# Supplementary material for: An Active Feature Selection Strategy for DWT in Artificial Taste
Source: Hindawi journal article supplement (doi:10.1155/2018/9709505), 2018-01-01
Supplement: f1 [file 9709505.f1.zip]

Archive with 63 entries (63 files):
- beer-hi-1.txt
- beer-hi-2.txt
- beer-hi-3.txt
- beer-low-1.txt
- beer-low-2.txt
- beer-low-3.txt
- beer-med-1.txt
- beer-med-2.txt
- beer-med-3.txt
- blackTea-hi-1.txt
- blackTea-hi-2.txt
- blackTea-hi-3.txt
- blackTea-low-1.txt
- blackTea-low-2.txt
- blackTea-low-3.txt
- blackTea-med-1.txt
- blackTea-med-2.txt
- blackTea-med-3.txt
- maofengTea-hi-1.txt
- maofengTea-hi-2.txt
- maofengTea-hi-3.txt
- maofengTea-low-1.txt
- maofengTea-low-2.txt
- maofengTea-low-3.txt
- maofengTea-med-1.txt
- maofengTea-med-2.txt
- maofengTea-med-3.txt
- oolongTea-hi-1.txt
- oolongTea-hi-2.txt
- oolongTea-hi-3.txt
- oolongTea-low-1.txt
- oolongTea-low-2.txt
- oolongTea-low-3.txt
- oolongTea-med-1.txt
- oolongTea-med-2.txt
- oolongTea-med-3.txt
- puerTea-hi-1.txt
- puerTea-hi-2.txt
- puerTea-hi-3.txt
- puerTea-low-1.txt
- puerTea-low-2.txt
- puerTea-low-3.txt
- puerTea-med-1.txt
- puerTea-med-2.txt
- puerTea-med-3.txt
- redWine-hi-1.txt
- redWine-hi-2.txt
- redWine-hi-3.txt
- redWine-low-1.txt
- redWine-low-2.txt
- redWine-low-3.txt
- redWine-med-1.txt
- redWine-med-2.txt
- redWine-med-3.txt
- spirit-hi-1.txt
- spirit-hi-2.txt
- spirit-hi-3.txt
- spirit-low-1.txt
- spirit-low-2.txt
- spirit-low-3.txt
- spirit-med-1.txt
- spirit-med-2.txt
- spirit-med-3.txt
