# Supplementary material for: An Active Feature Selection Strategy for DWT in Artificial Taste
Source: Hindawi journal article supplement (doi:10.1155/2018/9709505), 2018-01-01
Supplement: f1 [file 9709505.f1.zip › beer-hi-1.txt]

21539 22070 21690 22035 21528 21861 21470 22132 21616 22144 21685 21997 21520 21964 21687 22049 21507 22200 21636 22089 21396 22004 21521 22238 21707 22028 21362 21921 21421 22190 21367 22040 21528 22118 21720 22011 21713 21893 21667 21926 21649 22057 21904 21934 21893 21936 21650 21917 21760 22128 21632 21856 21904 22080 21766 21861 21597 21957 21696 22124 21893 21946 21702 21792 21706 22113 21864 21692 21536 21815 21618 22436 21922 21888 21660 21744 21922 22263 21890 21970 21559 21692 22055 22233 21585 21889 21632 21756 22204 22114 21636 21098 21687 21749 21856 22215 21684 22016 21792 21728 22021 22152 21624 21852 21904 21851 22301 22072 21287 21098 22185 21765 22240 21875 22112 21607 22175 21807 22134 21696 21885 21760 22074 21915 22117 21704 21836 21629 22008 21962 22253 21741 22092 21572 22177 21853 22200 21584 21923 21646 22082 21793 22246 21532 21976 21600 22050 21798 22146 21475 22048 21841 22214 21671 21990 21520 22167 21792 22070 21561 22090 21600 22332 21804 22005 21442 22113 21773 22253 21624 21890 21542 22263 21711 22125 21484 22050 21648 22255 21751 21981 21410 22060 21749 22324 21656 21931 21587 22190 21761 22145 21381 22081 21755 22258 21533 21479 21480 22228 21504 22538 21513 22187 21652 22024 21655 22251 21653 22083 21672 22156 21576 22185 21652 22032 21537 22029 21665 22113 21867 21870 21733 22132 21463 22053 21675 21847 21447 22115 21809 22071 21623 22150 21594 22057 21668 22086 21313 22011 22032 22032 21671 22033 21968 21906 21821 21916 21704 21997 21776 21986 21816 21966 21655 21960 21608 21924 21668 21893 21687 21867 21600 21955 21549 22096 21659 21895 21686 22133 21664 22150 21733 22203 21802 22184 21653 22259 21808 22240 21548 22240 21843 21971 21813 21897 21751 21944 21856 21924 21583 21837 21896 21760 21666 21717 21699 21748 21688 21744 21941 21644 22362 21909 22196 21769 21960 21652 21934 21784 22233 21726 21952 21747 21896 21989 22005 21848 22101 21579 22144 21678 22128 21683 22022 21821 21929 21803 22041 21722 22220 21526 22129 21600 22137 21632 22097 21767 22016 21671 22113 21626 22212 21680 22156 21703 22084 21658 22263 21517 22159 21622 22125 21699 22150 21642 22273 21514 22147 21707 21995 21539 22219 21417 22243 21664 21896 21717 22228 21649 22144 21621 22000 21647 22216 21438 22128 21683 21882 21604 22305 21632 22145 21474 22311 21332 22048 21628 22081 21480 22248 21390 21913 21733 21763 21512 22029 21624 22002 21609 22113 21329 22000 21578 21960 21404 21961 21441 21924 21648 21925 21719 22204 21428 22049 21489 22122 21701 21548 21768 22021 21708 21912 21744 22101 22071 21916 21697 21884 21653 21985 21811 21984 21574 22168 21527 21838 21932 22105 21680 21811 21873 21913 21030 21781 22040 21722 21666 22026 22152 21628 21701 21819 21742 21744 21760 22022 21769 21680 21719 22273 21756 21639 21739 22098 21657 21806 21922 21878 21702 21688 22054 21922 21547 21735 22185 21638 21641 21936 22089 21404 22202 21911 22208 21399 22016 21798 21935 21593 22225 21986 21833 21745 22089 21770 21762 21697 22155 21685 21985 21850 22240 21607 21852 21675 22349 21704 21853 21673 22084 21540 21943 21776 22183 21483 22139 21691 22192 21521 22151 21767 22212 21527 22242 21751 22267 21527 22076 21722 22308 21495 21989 21554 22328 21602 21947 21564 22257 21714 22146 21734 22225 21680 21964 21712 22299 21616 21916 21664 22332 21604 22083 21481 22183 21603 22048 21449 22112 21608 22087 21514 22120 21716 22103 21744 22077 21365 22085 21513 22001 21511 22178 21347 22056 21424 22203 21548 22019 21617 22098 21671 22016 21557 22148 21592 21936 21426 21936 21907 21866 21601 21856 21749 21977 21570 21895 21726 21964 22016 22028 21692 21925 22070 21848 21715 21737 21831 21980 21783 22117 21563 21789 21664 22312 21857 21632 21739 22076 22022 21721 21768 21843 22020 21710 21686 21702 22252 21819 22129 21693 22057 21928 21980 21768 21857 22021 21849 21924 21993 21696 22034 21857 22384 21873 22058 21720 22188 21796 21876 21516 22023 21847 22016 21681 21920 21861 22162 21636 21896 21708 22304 21718 21798 21607 22274 21911 21932 21079 22217 21790 22118 21497 22084 21724 22201 21499 22039 21689 22308 21645 21952 21655 22207 21651 21978 21544 22371 21717 22109 21397 22080 21696 22259 21481 22101 21789 22183 21561 21900 21700 22272 21552 22036 21472 22092 21498 22053 21533 22057 21684 22190 21486 22084 21560 22168 21444 22022 21547 22209 21586 22016 21536 22172 21554 21952 21612 22267 21640 21985 21408 22171 21467 21705 21710 21936 21616 22123 21588 22016 21853 21871 21639 21773 21779 21829 21696 21939 21684 22016 21790 21733 21815 21694 21835 21888 21778 21959 21595 21927 21757 21584 21863 22007 21808 21690 22260 21904 21872 22057 21726 21799 21840 22311 21615 21760 21726 22254 21789 21736 21594 22167 21920 21768 21856 21472 21833 21826 22215 21838 21898 21810 21608 21665 22149 21827 22188 21654 22137 21612 22061 21821 22263 21687 21912 21767 22199 21778 22090 21479 22160 21793 22075 21417 22205 21753 22062 21510 22142 21742 22167 21488 22386 21665 22023 21714 22307 21526 22190 21688 22115 21586 22278 21684 22018 21900 22064 21664 22288 21553 22259 21746 22166 21655 22088 21481 22170 21515 22230 21489 22010 21645 22055 21638 22065 21369 22208 21415 22189 21417 21936 21544 22026 21634 21936 21811 22182 21543 22197 21408 22124 21928 22176 21653 21884 21687 21972 21609 21974 21632 21925 21610 21957 21636 21949 21609 22101 21568 22199 21432 22213 21504 21781 21568 21912 21636 21768 21537 21843 21847 21849 21782 21787 22000 21812 22092 21796 22186 21575 22146 21722 21947 21996 21909 21725 21710 21296 22090 21479 22036 21670 22048 21632 22008 21641 21894 22045 21671 22029 21832 21785 22052 21808 22199 21752 22248 21620 22375 21506 22237 21640 22032 21786 22147 21696 22048 21862 21990 21746 22124 21578 22244 21544 22253 21444 22197 21685 22180 21670 21985 21656 22068 21665 22241 21355 22294 21555 22198 21645 22084 21707 21824 21626 22134 21733 22153 21528 22044 21713 22233 21468 22152 21709 22082 21556 22166 21589 22114 21561 21971 21623 21998 21359 22081 22083 21933 21394 22297 21403 22121 21582 21687 21733 21921 21696 21984 21813 21882 21669 22023 21575 22005 21637 21901 21620 21917 21763 21821 21469 21969 21431 21915 22096 21719 21697 22221 21623 21780 21983 21619 21776 22189 21676 21884 22155 21733 21664 22131 21879 21833 22112 21987 21805 21932 22167 21648 22293 21698 22115 21762 22128 21628 22049 21885 21847 21859 22075 21679 22006 21850 22213 21392 22159 21860 21956 21639 22136 21616 21968 21818 22183 21504 22166 21825 22060 21617 22252 21628 21961 21705 22215 21583 22034 21708 22173 21510 22343 21611 22032 21497 22295 21637 21996 21664 22177 21509 22119 21729 22244 21520 22339 21548 22157 21444 22165 21668 22154 21680 22072 21520 21995 21543 22096 21857 22088 21685 22087 21484 22092 21568 22059 21504 22246 21548 21958 21671 21868 21642 21293 21587 22055 21575 22008 21709 22105 21541 21966 21735 22082 21456 21992 21699 22101 21547 21879 21947 22061 21599 21988 21726 22102 21739 21967 21952 22105 21462 21736 22009 21979 21916 21863 22064 22044 21568 21825 21937 22038 21908 21779 22144 21837 21737 21496 21959 21591 21883 21915 22192 21494 22101 21999 21932 21568 21912 21773 22076 21532 21942 21943 22032 21408 22114 21860 22132 21426 22011 21764 22033 21261 22144 21883 22184 21349 22007 21781 22272 21480 21997 21772 22240 21494 22215 21645 22278 21439 22098 21696 22353 21414 22096 21690 22290 21626 22119 21605 22369 21714 21953 21560 22292 21683 22018 21403 22120 21692 22032 21531 22144 21702 21927 21543 22101 21554 22055 21583 22067 21721 22056 21381 22095 21629 22083 21682 22035 21639 22114 21763 21818 21637 22135 21448 22049 21776 22094 21617 21995 21635 22116 21584 21975 21856 22272 21596 22125 21858 21933 21806 21469 22007 22173 21607 21876 21760 22171 21760 21808 21828 22244 21671 21751 21882 21809 21805 21704 22249 21898 21739 21717 21993 21833 21688 22449 22108 21613 22101 21501 22044 21935 22049 21706 22215 21673 22048 21754 21848 21932 22132 21624 22227 21681 22023 21882 22028 21672 22298 21504 22237 21635 22008 21878 21913 21801 22094 21616 22236 21423 22254 21532 22240 21684 22089 21802 21992 21607 22236 21494 22342 21528 22272 21607 22284 21444 22234 21624 22158 21622 22144 21632 22160 21658 22104 21563 22281 21636 21955 21533 21904 21691 22047 21638 22156 21627 22124 21387 22236 21581 22304 21556 21968 21504 22156 21824 22092 21741 22028 21619 21948 22016 21898 21602 22021 21683 21900 21748 21888 21632 21814 21751 21857 21687 21695 21968 21704 21752 21746 21965 21866 22059 21865 22048 21833 21736 21731 21744 21968 21748 22179 21596 22238 21844 22087 21718 21637 21664 21783 22095 21652 22119 21712 22301 22083 21733 21827 21975 21712 21554 21680 22024 21848 22004 21883 22089 21632 22273 21473 22235 21556 22234 21262 22241 21627 22030 21681 22135 21702 21980 21682 22114 21804 21899 21752 22021 21717 21999 21857 22056 21639 22141 21643 22199 21603 22156 21587 22090 21735 22119 21576 22165 21658 22077 21681 22087 21596 22205 21656 22016 21584 22108 21569 22057 21785 22193 21652 21941 21584 22173 21583 22095 21575 22023 21408 21920 21690 21979 21618 21984 21848 22076 21787 21815 21565 22125 21480 22086 21714 22112 21608 22029 21730 21892 21592 21877 21571 22076 21760 21630 22117 21722 21908 21922 21835 21766 21653 21705 21725 21906 21671 22305 21738 22085 21578 22002 21660 21810 21570 21952 22049 21787 22125 21981 21797 21826 21976 21596 22080 21578 21968 21968 21819 21790 21859 21760 21880 21708 22155 21692 22182 21497 22260 21654 22040 21756 21934 21852 21888 21666 22223 21600 22305 21547 22121 21612 22060 21764 22007 21808 22190 21571 22263 21369 22231 21608 22130 21755 22050 21697 22232 21646 22168 21603 21958 21799 21941 21676 22262 21522 22167 21668 22106 21613 22066 21516 22176 21746 21796 21588 21923 21455 22156 21519 22272 21513 22062 21518 21952 21634 21879 21888 22152 21415 22130 21321 21854 21551 22056 21989 21985 21737 21996 21745 21947 21689 21994 21705 21879 21814 21882 21703 21806 21696 22212 21869 21853 21908 21865 21597 22008 21689 21623 22225 21864 21832 22220 21848 21819 22139 21729 21734 22119 21672 21808 22132 21540 21856 22173 22224 21785 22177 21509 22130 21814 21874 21826 22143 21518 22082 21867 21960 21696 22173 21447 22215 21685 21971 21677 22188 21683 22037 21713 22032 21698 22217 21609 21994 21688 22213 21648 22187 21721 21990 21569 22266 21463 22136 21737 22154 21495 22235 21579 22086 21760 22146 21504 22261 21801 22050 21629 22309 21445 22184 21646 22112 21351 22131 21690 22071 21627 21920 21818 21984 21496 22085 21350 22122 21560 21965 21530 22016 21474 21973 21492 22108 21742 22157 21709 21993 22039 22073 21697 22040 21612 22081 21556 22093 21664 21901 21753 22042 22140 21975 21644 21837 21990 22180 21511 21873 22188 21617 21702 22150 21865 21872 21621 22198 21655 21797 22088 21789 21617 22068 21751 21713 21847 21959 21639 21892 22038 21799 21669 22144 21630 21755 22232 21346 21940 21687 21999 21591 22252 21523 21849 21910 22036 21724 22088 21974 21952 21828 22163 21632 22080 21736 22081 21300 22141 21741 22145 21623 22007 21463 22320 21699 22561 21814 22116 21568 22297 21636 22040 21800 22067 21651 22281 21536 22188 21739 22034 21612 22216 21573 22233 21386 22222 21496 22327 21406 22259 21632 22071 21665 22292 21686 22144 21463 22091 21559 22156 21654 22077 21632 22049 21522 21916 21597 22085 21449 22101 21454 22133 21504 21984 21344 22000 21748 22018 21856 22007 21640 22087 21651 22144 21658 21984 21813 22085 21725 21935 21584 22048 22001 22025 21580 22116 21664 21892 21629 21850 21715 22061 21867 21787 21559 21889 21993 21999 21057 21826 22200 21792 21607 21636 22039 21799 21690 21719 21995 21878 21835 21616 21953 21864 21793 21907 22106 21860 21742 21661 22664 21895 22128 21715 22041 21654 21966 21735 22044 21599 21799 21904 22036 21495 22276 21780 21974 21685 22199 21551 22124 21836 22076 21648 22192 21735 21948 21791 21914 21655 22281 21568 22085 21776 22098 21624 22298 22040 22212 21600 22038 21728 22113 21588 22354 21462 22372 21497 22092 21732 22161 21665 22130 21514 22270 21601 22233 21623 22089 21740 21903 21664 22081 21586 22120 21431 22172 21496 22152 21648 21866 21697 22316 21526 22080 21723 22114 21357 22080 21575 21993 21594 22089 21952 21977 21655 21911 21639 21851 21639 22130 21498 21951 21383 22052 21576 22057 21718 21857 21664 22023 21799 21930 21671 21837 21744 21965 21523 22008 21860 22032 21586 22125 21621 22131 
22128 21340 22103 21504 21527 21419 22219 21512 21974 21432 22071 21546 22180 21198 22041 21184 22332 21527 22240 21339 22059 21527 22053 21539 22135 21193 22102 21185 22176 21268 21941 21278 22253 21168 22144 21749 21815 21472 15351 15139 15832 15578 16225 15917 16335 15760 16684 16043 16900 16537 17051 16433 17099 16835 17483 16913 17604 16909 17860 17281 18112 17449 18195 17332 18210 17671 18409 17754 18453 17617 18695 18023 18838 17943 18730 18214 18950 18424 19009 18356 18952 18282 19265 18638 19408 18631 19171 19046 19499 18892 19632 18823 19456 18978 19853 18803 19912 18967 19574 19120 19769 19081 20011 19245 19666 19456 19870 19548 20053 19698 20067 19159 20075 19287 20321 19419 20115 19247 20239 19424 20391 19725 20311 19719 20349 19836 20608 19483 20174 19773 20357 19826 20688 19613 19853 19804 20545 20421 20433 19973 20532 19940 20770 20140 20599 20178 20485 20179 20541 20128 20523 20237 20745 20083 20745 20327 20696 20217 20790 20272 20709 20172 20775 20631 20960 20587 20540 20604 20871 20509 20808 20370 20981 20645 20952 20715 20743 20633 20660 20493 20967 20984 20755 20469 55 57 57 62 151 2273 5749 7728 9213 10423 39177 28521 24989 23128 22588 22259 21967 21405 21680 21594 21224 21230 21621 21376 21256 21732 21062 21575 21061 21308 21177 21377 21145 21447 20769 21696 21152 21560 21111 21129 21197 21194 21349 21367 20969 21350 21132 21389 20960 21594 21328 21519 21060 21728 20918 21537 20933 21625 21024 21524 20851 21712 20864 21736 20793 21777 20976 21653 20957 21702 21392 21651 21071 21703 21014 21594 21063 21696 20967 21653 21152 21694 21079 21513 21079 21636 21061 21607 21024 21579 21197 21587 21128 21556 21200 21564 21089 21472 21223 21678 21143 22085 21077 21725 21068 21816 21073 21583 21021 21735 20983 21606 21052 21722 21009 21707 21144 21472 21452 21547 20887 21572 21139 21599 21031 21712 20973 21895 20871 21780 20880 21617 20935 21783 21034 21652 21101 21719 20850 21691 21163 21645 20915 21338 21479 21642 21248 21498 21125 21644 21173 21703 21134 21730 20928 21747 21281 21609 21216 21661 21316 21734 20930 21730 21331 21796 21415 21531 21436 21778 21188 21367 21406 21364 21221 21844 21060 21468 21538 21397 21264 21872 21165 21493 21543 21611 21484 21716 21088 21605 21511 39 861 8859 11364 13207 14645 15333 15609 16564 16800 43554 29748 25984 23776 23680 22781 22326 22435 21865 22035 21892 22343 21225 22008 21681 21750 21363 21671 21461 21725 21808 21811 21208 21869 21624 21783 21548 21969 21303 21765 21461 21863 21279 21715 21466 21639 21295 21952 21407 21831 21140 21977 21355 21902 21323 21993 21315 21868 21377 22073 21211 21891 21398 21930 21184 21954 21324 21815 21617 22096 21307 21814 21171 22168 21134 21879 21320 21974 21184 21867 21504 21975 21200 22115 21498 21918 21117 22016 21303 22055 21033 22023 21092 21938 20982 22029 21349 21917 21004 21893 21274 21862 21204 21877 21267 21760 21190 21840 21096 21793 21328 21776 21095 21637 20969 21980 21152 21732 21164 21949 21227 21884 21801 21837 21134 21518 21280 21892 21125 21793 21209 21950 21215 21946 21285 21959 21191 21835 21402 21619 21298 21665 21453 21768 21392 21895 21450 21746 21333 21944 21691 21454 21258 21584 21799 21743 21262 21754 21513 21787 21431 21687 21575 21868 21364 21436 21468 21929 21320 21522 21591 21804 21431 21627 21644 21977 21533 21780 21509 21722 21462 21500 21385 21737 21544 21440 22045 21461 21648 21189 22148 21617 5037 13209 16187 17155 18021 18020 19053 18871 19350 19072 29680 25050 23913 22627 22738 22165 22528 21554 22081 21815 22196 21610 21779 21465 22183 21392 21938 21232 22121 21435 21848 21489 22051 21495 21911 21409 22103 21470 21923 21139 22096 21416 22107 21034 21477 21412 22113 21281 21735 21463 22023 21353 21801 21488 22128 21355 21949 21315 22228 21344 22075 21274 22104 21188 22074 21239 21877 21335 21910 21317 21944 21234 22126 21327 21864 21167 21999 21145 21947 21136 22007 21347 21965 21283 21923 21527 21911 21487 21898 21345 22002 21162 22016 21353 22082 21531 21930 21520 21901 21393 21596 21237 21949 21521 21655 21497 21865 21599 21832 21352 21777 21468 21475 21446 21688 21696 21949 21472 21815 21499 21867 21559 21321 21314 21762 21883 21769 21220 21671 21716 21777 21231 21561 21764 21977 21297 21639 21619 21924 21535 21767 21515 22001 22109 21394 22135 21416 22012 21235 21937 21831 21908 21527 21959 21726 22019 21401 21783 21569 21923 21367 21877 21591 22030 21515 22250 21483 21787 21611 21793 21388 22034 21141 22152 21237 22035 21340 22231 21451 21845 21487 22315 21350 22086 21248 22185 21146 22179 21447 21952 21303 56 16653 19367 19537 20386 20061 20985 20236 20794 20420 29289 23881 23321 22148 22461 21431 22270 21568 22115 21392 22102 21426 22016 21196 21653 21442 22065 21234 22059 21064 21845 21158 22081 21523 21897 21228 21914 21107 21820 21360 21777 21492 21909 21431 21991 21883 21965 21562 21778 21418 21844 21589 21807 21408 21792 21445 21935 21443 21886 21336 21628 21551 22119 21655 21792 21665 21907 21446 21984 21511 21460 21811 21703 21424 21804 21345 21547 21687 21528 21260 21822 21405 21655 21819 21611 21929 21830 21488 21885 21717 21558 21837 21351 22100 21394 21930 21605 21705 21508 21867 21543 22058 21491 22071 21416 21973 21563 21936 21577 21702 21584 21905 21447 22057 21480 22101 21293 22092 21239 22202 21248 22077 21303 22182 20933 22043 21381 22030 21416 22076 21415 22165 21396 22149 21351 22192 21395 22022 21329 22077 21331 22061 21241 22048 21527 22105 21170 22279 21173 22241 21188 21989 21237 22018 21376 21958 21419 21788 21304 21978 21447 21772 21298 22018 21253 21933 21424 22128 21572 22125 21154 21986 21264 21721 21277 21618 21427 21812 21333 21810 21623 21801 21404 21867 21408 21930 21408 21909 21322 21848 21363 21756 18639 20602 21035 21299 21040 21046 21274 21383 21223 36327 22999 22692 22003 21805 22028 21677 21753 21666 21559 22187 21785 21971 21577 21536 21817 21640 21723 21774 21543 21936 21735 21808 22066 21344 22241 21373 21990 21608 21547 21639 21948 20980 22007 21338 21999 21697 21867 21526 22062 21251 22017 21300 21585 21354 21687 21306 22126 21224 21912 21317 21819 21385 22029 21208 22060 21287 21798 21406 22083 21069 22216 21248 21899 21397 22045 21157 22176 21326 21774 21558 21962 21250 22248 21347 21852 21191 22125 21033 22138 21233 21984 21141 22158 21162 21857 21299 22021 21164 22132 21297 21941 21216 21925 21066 21909 21704 22069 21448 21925 21588 21803 21407 21997 21721 21908 21422 21974 21316 21900 21455 21708 21417 22003 21284 21751 21488 21925 21229 21981 21845 21648 21558 21925 21688 21905 21505 21890 21320 21725 21674 21832 21334 21905 21773 21612 21396 21857 21719 21414 21689 21945 21603 21792 21699 21711 21879 21749 21972 21429 22212 21607 21918 21202 22019 21612 21763 21617 22028 21480 21611 21609 22024 21451 21928 21598 22139 21313 21852 21623 21986 21268 21701 21361 22219 21321 22237 21585 22055 21227 22281 21383 22050 21174 22087 21376 22017 21149 22185 21310 22200 21149 22180 21412 21956 21243 22192 21399 21960 21111 22137 21388 22086 21145 22093 21221 22029 21265 22081 21446 22077 21575 21897 21356 22032 21307 22081 21369 21988 21200 22017 21359 21900 21467 22024 21380 21680 21317 22039 21351 21606 21374 21968 21740 21804 21344 21946 21584 21692 21498 21994 21380 21750 21356 22029 21412 21643 21555 21982 21740 21735 21314 21916 21922 21668 21821 21817 21909 21821 21395 21883 21805 21724 21473 21712 21574 21977 21376 21689 21674 21870 21252 21658 21748 21949 21774 21207 21875 21475 21984 21523 22321 21632 21896 21652 22088 21557 21824 21365 21805 21632 21934 21413 22137 21463 21990 21218 22279 21396 22104 21272 22097 21573 22024 21313 22044 21496 22033 21353 21899 21493 22187 21229 21939 21537 22103 21257 21975 21384 22223 21168 21994 21435 22134 21201 22110 21392 22092 21220 22187 21445 21925 21190 22272 21257 22117 21259 22215 21307 22003 21536 21981 21391 21799 21399 22032 21223 22222 20962 22113 21385 22035 21153 22016 21380 22121 21314 22119 21354 21982 21163 21907 21153 21867 21569 21232 21535 21909 21478 22153 21383 21875 21201 21898 21362 21771 21483 21775 21760 21773 21493 22061 21618 22027 21515 21784 21515 21945 21617 21789 21750 21747 21922 21764 21831 21654 21745 21576 21817 21504 21703 79 59 5866 9637 12124 13728 14279 15195 15321 43492 43365 30476 26635 24738 23722 23208 22764 22737 22055 22266 21944 22474 21763 22576 21690 22168 60 56 12040 16020 16974 18494 18023 19146 18628 19632 43383 32432 26405 25253 23286 23765 22272 23058 21800 22822 21573 22579 21583 22352 21729 22204 21712 63 12441 17249 18232 19555 19305 20418 19719 20653 19899 37293 26442 24793 22737 23208 22411 22731 21649 22573 21595 22365 21479 22023 21368 22161 21577 21920 8257 18004 18970 20430 20567 20680 20247 21010 20272 21239 27239 24353 22780 22821 21299 22567 21760 22293 21776 22140 21659 21964 21959 21796 21562 21789 21598 17600 20199 20599 21054 20931 21165 21309 21513 21281 43369 23669 22739 22240 22435 21939 22007 21920 21965 21728 22009 21705 21853 21686 22075 21540 22385 21290 22211 21671 22045 21532 22032 21476 21961 21627 21975 21668 22036 21568 22630 21577 22085 21541 21959 21489 21874 21623 22112 21525 21943 21593 22119 21437 22140 21445 22152 21277 22248 21242 22325 21124 22378 21217 22328 21319 22217 21432 22041 21442 22035 21530 21948 21461 22196 21396 22204 21103 22285 21225 22113 21357 22084 21313 21549 21170 21970 21271 22024 21082 22042 21320 22189 21251 22214 21096 21907 21229 22058 21237 22340 21189 21849 21386 21986 21525 21997 21312 21961 21485 21875 21650 21613 21604 21808 21589 22068 21559 22263 21300 21704 21366 21698 21728 21817 21399 22087 21175 21888 21507 21591 21866 21482 21720 21987 21410 21797 21633 21671 21687 21476 21669 21925 21597 21428 21615 21647 22087 21291 22244 21397 22225 21530 21949 21784 22075 21301 21909 21689 21831 21815 22039 21336 22126 21268 22057 21544 22003 21385 22105 21270 22136 21450 22048 21571 22119 21733 22347 21258 22240 21462 22065 21406 22201 21138 22304 21202 22036 21449 22027 21178 22238 21451 22030 21461 22029 21289 22333 21333 22217 21243 22201 21063 22007 21447 22060 21382 21868 21160 21965 21270 22139 21015 22058 21319 22069 21189 22007 21302 22018 21896 21837 21568 21536 21268 21985 21293 22055 21507 21681 21385 22125 21269 21856 21566 22009 21434 21949 21445 21597 21648 21962 21392 21883 21636 21645 21776 21938 21401 21649 21668 21510 21312 22014 21596 21783 21689 22012 21458 21840 21632 21423 21453 21830 21461 21789 21555 21996 21408 21013 21776 21542 22074 21319 21936 21244 22073 21474 21795 21920 22105 21479 22004 21768 22042 21505 22058 21472 22192 21405 22176 21332 22011 21601 21901 21597 22189 21315 22346 21476 22102 21473 22138 21261 22486 21438 22130 21383 22301 21377 22132 21425 22257 21193 22215 21505 22096 21378 22199 21389 21943 21479 22219 21219 22340 21239 22078 21287 22093 21085 22109 21264 22093 21022 21917 21577 21883 21167 22155 21137 22176 21332 21959 21498 22001 21132 21640 21258 21745 21193 22052 21239 21556 21277 21898 21428 21796 21703 22039 21149 22007 21321 21879 21393 21860 21440 21972 21436 21706 21486 21789 21505 21911 21359 21899 21413 21585 21504 21889 21262 21915 21479 21723 21672 21765 21661 21811 21717 21701 21260 22156 21565 21689 21891 21785 21431 21827 21805 21533 81 57 5361 10228 13120 14103 15763 15840 17473 16819 43361 35641 28536 25480 24338 23304 58 13911 17415 18089 19096 18999 19778 19389 19933 43367 33197 26951 25404 23517 23575 3634 16677 18300 19836 19744 20699 20192 20803 20224 43360 30405 26284 23575 23705 22550 6307 17373 20080 19957 21277 20589 21153 20658 21546 20978 28762 24001 23924 22660 23188 72 20120 20078 21230 20763 21888 20880 21687 21139 21825 25713 23500 22660 22612 21681 22452 21482 22456 21318 22177 21436 21907 21480 22221 21679 21685 21383 22135 21291 21952 21461 21863 21451 21749 21269 21963 21329 21825 21538 22080 21409 22092 21460 21707 21580 21769 21465 21964 21272 21767 21640 21594 21715 21796 21497 21953 21274 21985 21527 21696 21734 21593 21868 21837 21471 21747 21120 21863 21554 21899 21943 21575 21847 21650 21842 21827 21605 21841 21552 21559 22115 21550 22258 21230 21844 21398 21891 21684 21782 21629 21731 21632 21920 21550 22197 21316 22052 21321 22130 21427 21960 21699 21825 21615 21809 21440 22170 21434 22178 21255 22217 21302 22157 21222 22247 20903 22036 21501 22064 21504 21997 21443 22054 21448 
21934 21680 22060 21723 21956 21723 21804 21708 21905 21713 21799 21757 21709 21693 21864 21687 21903 21830 21742 21900 21734 21671 21777 21925 21504 21861 21734 21751 21847 21856 21734 21904 21781 21870 21856 21656 21784 21831 21685 21925 21732 21895 21822 21821 21888 21903 21794 21832 21751 21783 21745 21859 21674 22021 21847 21928 21721 21857 21773 21944 21737 21976 21568 21966 21646 21943 21748 21699 21688 21875 21684 21985 21637 21856 21383 21143 21090 20927 21052 21020 21448 21241 20963 20726 21189 20992 21409 21294 21053 20977 21173 21096 21463 21314 21061 20672 21242 21074 21400 21230 21093 21047 21202 21176 21476 21209 21176 20993 21268 21208 21117 21424 21044 21020 21136 21544 21203 21196 20986 21257 21288 21433 21267 21126 21056 21264 21184 21435 21302 21191 21058 21300 21272 21552 21193 21206 21067 21441 21255 21473 21244 21373 20736 21376 21293 21467 21233 21235 21109 21504 21333 21405 21117 21453 21214 21518 21308 21324 21068 21549 21287 21525 21205 21339 21223 21616 21233 21473 21095 21504 21284 21572 21241 21420 21134 21624 21248 21608 21127 21584 21263 21632 21269 21541 6152 10569 13185 14973 15699 16374 16361 17411 17335 41290 23518 22552 21646 21849 21294 21700 21341 21752 21201 21606 21401 21492 21171 21633 21325 21598 21661 21666 21230 21741 21106 21632 21305 21435 21277 21611 21250 21635 21203 21792 21146 21632 21327 21629 21076 21653 21496 21632 21340 21776 21399 21766 21639 21591 21414 21452 21440 21544 21440 21496 21464 21542 21382 21536 21463 21522 21421 21486 21349 21625 21305 21744 21281 21587 21296 21648 21296 21625 21219 21607 21342 21706 21225 21810 21195 21799 21296 21842 21268 21770 21371 21796 21260 21850 21271 21787 21385 21685 21384 21699 21490 21713 21321 21688 21552 21659 21410 21568 21447 21485 21516 21476 21447 21479 21470 21686 21933 21311 21698 21524 21577 21629 21641 21600 21882 21560 21573 21668 21415 21722 21559 21636 21737 21593 21725 21447 21820 21474 21808 21583 21676 21504 21697 21558 21852 21445 21834 21488 21807 21649 21268 21617 21701 21623 21813 21581 21800 21477 21748 21570 21627 21603 21811 21447 21889 21511 21708 21584 21696 21526 21913 21387 21830 21609 21702 21549 21881 21408 21884 21576 21641 21548 21848 21539 21873 21585 21552 21640 21858 21384 21912 6215 15365 16797 18049 18062 18717 18775 19377 19041 19635 26037 23808 22240 22212 21702 22063 21622 21870 21499 21861 21399 21842 21546 21761 21655 21781 21530 21985 21483 21820 21362 21860 21530 21790 21581 21891 21428 22144 21341 21816 21393 21854 21444 21944 21586 21829 21573 21749 21492 21736 21551 21760 21589 21863 21515 21829 21581 21966 21432 21824 21510 21804 21470 21804 21796 21671 21592 21775 21623 21873 21641 21992 21565 21897 21564 21949 21471 21710 21577 22073 21527 21708 21701 21832 21656 21786 21794 21659 21473 21763 21808 21570 21582 21751 21728 21620 21587 21843 21749 21728 21577 21981 21852 21815 21858 21674 21655 21505 21838 21787 21616 21703 21766 21732 21569 21703 21807 21693 21665 21742 21817 21511 21804 21837 21924 21521 21767 21733 21888 21526 21872 21707 21738 21465 21863 21714 21873 21431 21853 21656 21893 21476 21857 21681 21895 21511 21907 21646 21947 21543 21930 21595 21980 21505 21896 21620 21999 21440 21897 21692 21915 21559 21906 21738 21959 21527 21779 21759 21984 21519 21981 21718 21957 21625 21792 21541 21931 21668 21701 21636 21888 21626 21804 21617 21924 21673 21622 21580 21890 21584 21772 21520 19237 19785 20515 20809 20937 20630 20937 20620 21095 26522 23129 22382 22265 21859 22049 21831 21921 21716 21947 21720 21837 21742 21938 21652 21981 21633 21824 21675 21734 21573 21808 21713 21786 21608 21776 21772 21622 21523 21783 21598 21658 22051 21908 21780 21860 21592 21645 21588 22017 21441 21660 21613 21949 21680 21799 21627 21905 21873 21634 21673 21812 21820 21722 21632 21802 21827 21732 21627 21583 21954 21771 21243 21691 21901 21664 21659 21609 21847 21748 21606 21689 21854 21799 21671 21825 21863 21796 21884 21573 21856 21741 21879 21584 21403 21725 21868 21728 21923 21728 21861 21693 21795 21639 21909 21696 21851 21765 21858 21672 21864 21504 21933 21749 21920 21541 21853 21667 21957 21648 21784 21656 22007 21693 21799 21445 21911 21669 21833 21616 21924 21706 21958 21561 21910 21591 21927 21594 21952 21558 21821 21634 21861 21527 21856 21679 21914 21621 21952 21609 21969 21384 21832 21591 21901 21442 21760 21593 22035 21622 21875 21773 21899 21832 21785 21788 21780 21588 21849 21918 21861 21693 21824 21733 21905 21649 21837 21808 21879 21646 21936 21649 21883 21695 21632 21696 21768 21775 21803 21570 21994 21605 19440 20935 21080 21170 21559 21369 21364 21347 21718 21344 22836 22184 22054 21837 21937 21820 21910 21714 21921 21856 22023 21825 21860 21669 21683 21958 21788 21790 21515 21647 21699 21879 21833 21897 21719 22261 21605 21858 21736 21883 21849 21747 21479 21879 21680 21832 21760 21734 21710 21992 21696 21777 21741 21959 21696 21798 21658 21898 21673 21765 21665 22000 21602 21833 21702 21952 21494 22024 21675 21920 21670 21984 21728 21891 21786 21872 21685 22000 21513 22084 21677 21904 21601 21850 21614 21892 21441 21990 21560 21882 21558 21891 21617 21877 21575 21940 21593 22052 21520 21895 21548 21692 21653 21721 21637 22026 21705 21634 22004 21935 21864 21865 21861 21760 21751 21775 21616 21931 21701 21855 21775 21872 21721 21865 21660 21807 21608 21877 21543 21739 21549 21908 21642 21841 21575 21858 21746 21700 21645 21770 21816 21723 21749 21741 21825 21655 21968 21640 21853 21740 21936 21671 21817 21792 21689 21699 21638 21581 21825 21678 21833 21681 21832 21825 21593 21819 21640 21714 21715 21761 21767 21713 21917 21618 21908 21481 21933 21608 21846 21690 21896 21772 21861 21805 21704 21696 21767 21771 21831 21575 21922 21783 21444 21354 21802 21475 21816 21619 21685 21609 21760 22835 22198 21747 22068 21552 21993 21703 21924 21736 21865 21789 21967 21575 21937 21609 21956 21708 22377 21788 21930 21641 21890 21662 21952 21720 21836 21735 21881 21670 21972 21453 21945 21623 21912 21698 21895 21589 22005 21531 21954 21667 21746 21633 21967 21028 21937 21620 21905 21619 21912 21580 21942 21567 21798 21743 21707 21642 22025 21553 21975 21828 21796 21665 21946 21618 21730 21866 21661 21564 21952 21784 21767 21853 21866 21587 21945 21576 21824 21884 21753 21702 22032 21589 21740 21988 21745 21927 21742 21869 22041 21926 21704 21603 21837 21904 21597 21771 21846 21836 21624 21933 21799 21666 21746 21928 21642 21824 21808 21879 21745 21928 21800 21766 21709 21904 21632 21836 21743 21932 21600 22016 21667 21841 21583 22007 21661 21858 21698 22008 21555 21904 21746 21879 21494 21963 21719 21868 21590 22071 21713 21801 21684 21904 21709 21882 21623 22001 21618 21875 21632 21943 21515 21964 21723 22023 21608 21959 21645 21863 21806 21904 21843 21958 21682 21949 21658 21862 21589 21905 21688 21904 21683 21929 21817 21893 21751 21981 21696 21948 21720 21911 21728 21996 21771 21817 21697 21958 21921 21735 21674 21837 21991 21847 21585 21814 21817 21808 21660 21848 21925 21703 21704 21843 21916 21722 21654 21818 21836 21765 21705 21836 21975 21697 21773 21770 21864 21701 21856 21867 21820 21713 21867 21833 21746 21735 21901 21739 21772 21675 21860 21786 21801 21697 21933 21798 21847 21684 21962 21802 21905 21751 21929 21729 21931 21872 21920 21763 21935 21683 21927 21753 21901 21795 21944 21748 21958 21738 21881 21738 21981 21655 21868 21777 21920 21705 21974 21772 21980 21696 22002 21609 21840 21752 22195 21652 21879 21804 21749 21593 21970 21709 22030 21659 22029 21735 21944 21575 21927 21589 21832 21617 21872 21706 21757 21833 21860 21738 21749 21676 21879 21715 21930 21675 21896 21780 21980 21698 21893 21760 21869 21648 21784 21779 21909 21575 21683 21827 21895 21580 21831 21699 22017 21711 21832 21764 21783 21650 21906 21923 21760 21632 21888 21979 21772 21676 21915 21747 21761 21756 22045 21963 21819 21907 21784 21978 21793 21734 21824 21870 21602 21879 21815 21705 21948 21842 21788 21962 21798 21785 21724 21728 21781 21883 21729 21994 21735 21844 21731 21827 21800 21882 21701 21888 21554 21952 21703 21947 21751 21895 21735 21864 21712 21937 21646 21960 21720 21947 21669 21957 21561 21973 21701 21986 21760 21856 21688 21920 21680 21959 21714 22080 21655 21958 21669 21696 21729 21928 21611 21985 21663 22005 21562 21897 21591 21972 21557 21991 21487 21898 21572 22008 21671 21804 21636 21917 21655 21937 21696 21921 21671 21879 21799 21786 21782 21793 21815 21832 21739 21754 21709 21765 21766 21952 21824 22041 21736 21812 21905 21793 21866 21807 21604 21797 21815 21811 21736 21917 21620 21990 21710 21840 21673 21715 21765 21944 21831 21788 21969 21760 21744 21826 21740 21829 22059 21849 21872 21752 21742 21843 21802 21790 21948 21706 22007 21569 21921 21883 21889 21643 21933 21719 21893 21700 21928 21782 21952 21744 21813 21796 21904 21793 21690 21767 22413 21722 21952 21760 21872 21698 21966 21685 21911 21696 21897 21701 21913 21761 21934 21742 21898 21671 21875 21735 21933 21676 21891 21735 21861 21707 21927 21675 21853 21655 21943 21626 21924 21676 21812 21760 21900 21612 21737 21650 21825 21630 21989 21696 22020 21634 21888 21616 21883 21603 21877 21743 21917 21528 21842 21582 21906 21676 21825 21697 21805 21760 21779 21913 21888 21768 21697 21664 21774 21719 21922 21686 22005 21665 22020 21929 21862 21595 21778 21689 21805 21844 21824 21884 21862 21761 21650 21952 21884 21750 21696 21820 21853 21781 21961 21799 21868 21897 21781 21799 21861 21882 21545 21863 21765 21771 21693 21752 21798 21773 21784 21906 21587 22011 21546 21902 21703 21882 21815 21811 21815 21913 21696 21959 21564 22007 21710 21897 21748 21803 21711 21955 21543 21943 21782 21943 21745 21856 21797 21975 21668 22001 21659 21869 21668 21875 21671 21869 21623 21938 21565 21922 21685 21942 21671 22000 21702 22003 21683 21920 21526 21808 21641 21765 21900 21899 21601 21748 21662 21883 21675 21874 21697 21824 21725 21872 21641 21912 22071 21888 21702 21771 21715 21871 21653 21928 21624 21799 21816 21682 21744 21981 21706 21760 21819 21794 21771 21937 21696 21798 21889 22086 21668 21917 21784 21809 21856 21643 21839 21933 21816 21744 21873 21740 21987 21822 21864 21815 21939 21824 21923 21788 21676 21922 21856 21623 21932 21775 21771 21796 21955 21569 21908 21836 21752 21644 21952 21696 21908 21809 21920 21709 21989 21718 22016 21824 21979 21550 21995 21744 21827 21685 21960 21596 21891 21785 21896 21694 22044 21767 21981 21797 21879 21590 22001 21686 21961 21596 21901 21769 21818 21687 21975 21640 21808 21696 22039 21692 21935 21672 22158 21691 21888 21545 21836 21719 21770 21584 21958 21582 21905 21832 21798 21734 21872 21776 22024 21752 21937 21680 21870 21696 21826 21650 21818 21667 21837 21689 21932 21699 21848 21872 21850 21832 21976 21621 21738 21794 21906 21632 21849 21900 21889 21731 22007 21570 21824 21865 21853 21696 21894 21794 21760 21713 21911 21664 21797 21824 21920 21920 21725 21645 21761 21848 21722 21792 21882 21833 22208 21974 21796 21811 21830 21958 21701 21860 21780 21812 21661 21939 21687 21866 21865 21890 21728 21992 21737 21879 21831 21888 21688 21970 21740 21921 21781 21873 21718 21956 21632 21936 21765 21899 21748 21959 21702 21920 21648 22047 21610 21938 21621 22002 21079 21911 21733 21896 21745 22002 21658 21968 21683 21877 21562 21959 21850 21838 21712 21900 21764 21909 21986 21907 21692 21928 21649 21889 21459 21961 21611 21980 21697 21725 21705 21888 21713 21674 21591 21936 21771 21847 21696 21772 21764 21888 21656 21834 21687 21860 21677 21926 21712 21858 21867 21914 21670 21672 21917 21883 21785 21773 21608 21993 21733 21733 21748 21949 21734 21801 21783 21944 21748 21885 22164 21920 21797 21751 21794 21978 21837 21709 21721 21958 21941 21584 21752 21709 21946 21749 21809 21851 21860 21610 21874 21894 21789 21762 21861 21765 21832 21863 21889 21584 21943 21736 21767 21760 21907 21861 21895 21801 22013 21746 22018 21517 21890 21745 21792 21793 21908 21611 21942 21736 21902 21815 21756 21729 21964 21587 21978 21607 21958 21753 21761 21778 21888 21699 21913 21692 21948 21686 21944 21725 21904 21699 21947 21671 21847 21741 21864 21707 21896 21574 22009 21841 21741 21670 21896 21704 21880 21705 21908 21649 21907 21615 21956 21655 21989 21788 21633 21670 21847 21867 21806 21528 21974 21812 21851 21735 21960 21760 21919 21721 21826 21728 21242 21668 21832 21735 21773 21696 21845 21612 21909 21817 21993 21747 21907 21579 
37720 34805 38984 35686 37867 35643 36234 35274 37234 35297 36241 36010 35367 35168 36852 35155 37491 36618 35808 37309 35643 34864 35767 37605 32626 36816 35600 35874 36848 36745 35608 37143 36012 37153 36728 34561 35848 36639 35029 37575 35543 37303 36640 36608 36975 37555 36049 36493 35927 36066 35643 36912 34870 38496 36954 37605 35510 36789 35994 37755 35713 38143 33488 38074 34640 37888 35760 35152 34900 37089 34913 38185 34448 36631 35461 35207 35808 37533 35420 39125 42965 38146 33184 37609 35820 35598 34528 36608 35131 38009 36359 36646 33848 37738 35495 35061 34128 38210 33523 37826 34396 38693 35079 36561 37205 36944 35788 34448 35244 37226 35285 37789 38330 38016 39022 33372 39786 40019 37830 40399 40800 42509 40716 39208 38227 40307 39683 42560 41152 40109 38396 40853 40631 33429 39682 40121 38713 42326 40664 42816 40759 42056 34816 41280 41104 42984 40518 40533 39149 32688 41043 42260 39435 42728 40458 33245 40805 41325 38698 33600 40640 33263 39819 41568 40512 34267 40114 42784 39154 32695 40376 33747 40295 42300 39478 34408 39912 34208 39029 33728 40449 34306 40365 33464 22468 28813 35991 35713 33255 40283 40551 30034 39064 40048 44544 34032 34448 36736 40884 35249 41388 35979 39820 34256 41768 43107 39884 34383 41142 34320 34695 34532 40279 35979 38800 34203 40819 42603 40981 34481 40025 34481 39840 36065 39269 34224 41232 34757 38372 34659 42768 34388 41224 35928 41920 36005 34448 33895 41880 42722 42416 33504 41936 43155 42853 33588 41480 33234 42510 33197 42060 43237 41763 34628 40849 35735 40496 34019 40503 34490 40512 34569 40045 34377 41333 35442 40197 36395 39984 36451 40605 36792 40384 35986 41781 36301 40360 36984 40613 36326 41677 35238 41508 35360 42736 35515 41049 35153 33172 34570 41784 33642 42325 43248 33280 42448 42784 43200 43142 35293 37800 41245 35249 32881 33545 34385 34314 33718 37036 33456 33526 34519 42026 35657 33588 34091 35543 33873 35480 42408 36752 42605 36406 33992 34773 32444 34838 33402 36732 42368 36872 42688 36768 34447 40334 34347 35078 34368 36293 33828 36004 42708 35972 33488 34344 33949 36237 42456 37336 32981 35111 33552 34772 32947 37328 41817 36786 34176 35081 33394 37102 41778 37504 33664 34304 33257 36564 33223 36880 33753 33125 34133 36708 41576 37593 23675 28936 33369 36762 37271 33920 34482 40664 37488 33707 40384 37202 40912 40836 35404 39232 34456 37062 43136 37268 41986 36852 33349 35472 34636 35891 33074 38064 42957 36778 41497 37070 33136 36016 33856 37072 42124 39936 41638 36560 41687 37200 42293 38035 33792 36407 33680 35672 42775 35823 33570 35362 33836 36957 33009 36405 33882 38080 42246 36555 32825 36087 42733 36548 36080 34871 33760 35963 34420 36903 34433 38250 33796 37120 33649 37905 42949 35668 33703 39093 33305 35117 35124 36432 34501 35930 36007 34706 42496 35992 36118 33478 33728 35785 35309 34148 33739 36604 35814 35277 33656 38284 36945 36488 36821 34849 34619 32551 36579 36141 34040 35168 35712 35433 33496 35131 36441 35213 34600 35701 36422 32922 36114 36743 37532 32928 35719 35554 36929 33062 36772 35349 35596 42552 37356 35277 36982 42350 37236 34560 37129 42665 37100 34886 37267 32960 37239 34598 37924 33452 37542 34112 38199 32751 37004 34228 38624 42199 37528 35152 37536 33674 37150 35669 38081 33245 35792 36097 38132 33230 38240 35462 37954 34451 35864 33228 37651 34726 35108 34170 36864 34392 36180 34144 37408 34889 34235 33648 36939 33644 35733 32731 39184 35429 32175 35336 37003 33616 36928 33504 38728 45632 40642 42816 41688 37177 38860 36776 37496 35330 37948 35399 36711 35824 37648 34520 38300 34304 36215 34936 35515 33625 35998 35220 35948 34019 35602 35826 34289 32889 35916 34073 34502 38752 37392 35916 36820 33880 34432 33677 38290 42304 34944 34272 37936 34804 36213 34485 37191 37064 34249 34734 36192 36475 35448 34050 36120 36512 35473 34451 33880 37742 35989 40598 35360 37388 34552 34682 34064 36776 35703 34070 34934 36897 36298 34889 36311 37076 36096 37259 33712 36593 35800 37267 33657 41906 35840 37040 35353 37528 35376 36923 35232 36096 34449 37350 34944 36872 35760 36791 34740 36845 32563 37659 35864 37347 33307 36836 34755 37926 34375 35840 34480 38629 35315 36246 42361 37792 34848 36554 34049 37403 35267 37943 33628 37298 34012 37642 34005 37607 33539 36464 34198 36864 33168 36569 35115 37416 34368 37655 34212 37958 41664 36730 34017 37316 42248 35762 33917 38603 34428 37060 35996 37360 36474 36034 36064 35840 33756 36694 37596 37019 35244 36240 35584 37219 34460 36663 36133 37276 34597 37488 34472 37252 35362 34039 34807 35618 36041 36322 33504 38314 34188 41211 37331 38548 39542 33751 41536 41743 41651 35629 41125 37096 40363 39128 36896 37696 36548 37431 35288 37421 36747 38682 36514 36864 34800 34875 37926 36132 36176 32983 34526 35034 37224 36643 37287 35529 41224 34313 36730 35542 37312 36855 35792 42824 37568 34803 36435 35496 35549 35328 38301 34995 35754 35766 38082 34992 36121 34608 37188 34872 35687 34597 38265 34026 36507 35173 37709 43008 38789 35064 37317 34818 38070 35387 37134 36056 36896 35020 38284 32965 39062 35113 37112 33971 36710 34320 37009 42259 38660 33544 37104 33525 37047 34200 37088 33804 37600 33999 38736 32886 37180 33396 34984 34496 35346 34304 38501 35328 34148 38304 38029 36985 37051 37001 35526 35881 36054 34048 37641 35232 37020 36116 36902 35468 36957 34698 36380 34053 37056 33408 35618 33440 37174 34445 36522 33787 36692 35662 35022 34496 35715 36304 35544 35765 35765 36388 34678 37873 34357 36888 35698 37552 34964 36384 35904 35040 35056 34291 33767 36291 34967 36555 34852 36435 36407 33974 36439 34306 35127 35281 35546 35845 35206 37587 34220 37224 42853 38118 34128 36656 35056 37104 35889 36949 36403 35153 34849 35802 35924 36640 33792 37348 36101 42222 41745 36471 42698 36608 34297 34908 34074 35400 36918 40603 35952 39040 33353 38324 35365 37464 35584 36985 36201 38304 33866 37577 34210 37788 35328 42307 36336 37673 34472 36985 34816 37668 35392 36594 35730 37198 34805 38024 42642 38160 34524 37292 35062 37263 33925 38496 33314 37697 34801 35584 34166 38216 38084 37760 34276 37192 34324 37273 33804 37718 33879 36056 35904 35313 34353 38507 33441 38178 36521 36048 34627 37796 34221 35328 36969 34837 33520 37600 35944 35856 36960 37015 33880 37772 33696 36171 37264 35900 35147 38438 33988 35571 38258 35733 37717 35852 37159 38778 37734 35172 34013 36656 37184 34131 35832 36725 36667 34269 37740 36352 34643 35565 37535 34456 36216 36125 37272 35675 37544 36162 35749 35344 37128 34123 36545 35916 37697 33878 38184 34822 36549 33987 38613 34885 36748 35023 38488 33549 37049 35680 37256 42996 38442 35599 37035 33902 39168 35360 36210 34869 37100 35409 37175 34468 38375 34272 37047 34126 37834 33058 37943 35632 38604 34152 38016 34643 36996 36408 37174 36760 38006 34921 37968 34696 36885 33913 37168 34973 37098 34997 37616 36480 37216 35960 38388 35001 37866 35401 37496 35384 38448 36019 36425 35024 37927 37553 35752 34816 36680 38534 36960 33766 36257 36444 36123 34660 36634 37639 35334 35068 36660 37542 35488 34547 36352 36652 35765 35206 36590 38332 35125 35912 35787 36889 35190 36657 37139 36527 35235 37076 36633 35664 35667 37398 35801 35827 34912 36791 36037 36209 35012 37768 36242 36872 34906 37991 36294 37276 35959 37671 35496 37754 36953 37395 35768 37921 35027 37673 35922 37410 36167 37768 35748 37975 35701 37204 35680 38384 34775 36992 35847 37346 35271 38147 35937 38272 35000 38386 34243 36409 35751 40480 34647 37212 36311 35827 33913 37930 35456 38679 34853 38692 35809 37741 33848 37622 33956 36390 34161 36816 35248 35963 36594 36866 35670 35770 34849 37179 35400 37624 35009 37095 35904 38268 35097 37157 35538 37145 34336 35818 35911 37409 33840 34824 36452 37328 33824 36552 35146 38341 35612 36459 35658 36044 34396 37180 37632 35552 34055 36857 38389 35956 34853 37527 35816 35575 35867 38936 38247 36627 37405 35959 38250 36104 35592 36256 37163 33988 37185 36522 35248 37856 36682 36080 38041 36246 36036 35460 35297 35920 37326 35489 38413 35787 36626 35534 36499 36120 37212 35192 36906 33364 37607 35334 37952 35984 37317 35750 36880 35151 37624 34614 37861 35401 37958 34835 37927 33628 38074 35244 38194 35586 36675 34953 37296 34773 38032 35297 38985 34800 37927 34850 34832 35370 37513 34323 38158 34979 38550 33655 37148 34033 37986 33565 38384 43155 37568 33617 38416 34985 36200 34231 37536 34739 37607 34960 37412 34944 37217 36328 36015 35949 36011 36484 36502 35768 35816 35360 35707 35735 37699 36360 38792 35653 36240 37280 36064 37003 36493 33987 36065 36486 36352 35529 37594 34263 38299 35460 36468 34838 35285 35713 37717 36739 36084 38048 35584 35515 36356 35684 36519 39107 36930 36941 35768 35778 36692 36240 36168 37896 35296 38668 33635 37360 37352 37120 34552 37748 35559 37187 35090 37517 36022 37728 35584 36358 36061 37157 36048 35078 35803 42689 35720 37712 35560 36882 35036 38135 35076 37478 34962 37208 35207 37431 35672 37797 35865 37248 34931 37075 35736 37800 34944 37105 35736 36934 35366 37687 35008 36905 34720 37866 34448 37416 34928 36215 35499 37272 34241 35552 34379 36310 34522 38308 35013 38363 34295 36871 34082 37237 34099 37080 35936 37608 33070 36456 33875 37156 34916 36352 35018 36316 35508 35884 37467 36993 35748 35009 34453 35875 35473 37429 35047 38544 34736 38360 37736 37015 34112 35715 35024 36308 36649 36304 37285 36992 35653 34380 37655 37321 35848 34876 36421 36964 36009 38028 36367 37056 37300 36008 36274 36926 37249 33378 36944 35789 35897 35184 35706 36144 35958 35893 37258 33909 38660 33427 37296 35315 37179 36533 36363 36498 37491 34957 38050 33666 38584 35480 37225 35726 36322 35470 37920 33504 37816 36033 37920 35722 36683 36177 38311 34752 38391 34837 37092 34692 37057 34914 37123 34462 37594 33763 37360 35047 37769 34986 38276 35256 38517 35061 37309 33089 35977 34379 35671 37261 37415 34004 35618 34743 37270 34992 36952 35050 36232 35601 36870 34439 37281 39234 37080 35213 35872 35320 37226 34610 37493 34320 36192 36329 34839 35472 38368 35316 35444 36519 36049 35914 37664 34967 36100 37062 39296 34806 37559 35971 36232 36704 34537 36792 37844 36400 35538 36995 35706 38336 36676 36929 36524 37800 36356 37592 36128 34893 37402 36749 34480 37656 36120 35936 36038 37952 33601 37196 36676 35765 34419 37656 34967 37255 36280 37368 35421 38357 35472 38231 36372 38375 33576 38438 35640 36484 35008 37888 34052 37073 36064 37153 35240 38804 35979 38400 36236 37301 33923 38356 35079 37996 34052 37319 35856 36425 35112 38256 34396 36041 34896 38804 35207 37888 34791 40032 35338 36924 33348 36519 35501 35769 33585 37861 33937 37165 36536 36183 35584 36880 35738 38437 35840 37665 34793 37094 34944 36350 34407 36353 34755 36680 35078 37655 35203 36653 36937 36819 36521 38161 34407 35543 36000 37243 34134 36712 37333 37091 35588 38673 33639 36174 37022 36984 34939 37152 36059 35480 35203 37482 34578 36090 36290 37360 37423 35638 34545 35521 36673 35445 35881 37192 36657 40407 38389 36154 36340 36552 38004 35240 36806 35872 36258 34771 37728 35175 36963 37045 37106 35366 38306 35730 37257 36704 36980 34968 37989 35752 37458 36019 37021 35408 37845 34154 37472 35810 37366 35732 38082 35240 37324 34352 38983 34272 37588 34381 38368 38912 37654 35682 37124 35680 38445 34714 37878 35025 37120 33592 37978 36890 36780 35148 37253 35690 37392 38208 37466 35144 37520 34481 36992 42546 38327 34360 38198 35097 35538 35191 36903 35256 34772 33904 37461 35995 36856 34932 35795 35623 36933 34546 36512 35112 36792 35016 37568 35154 36752 37159 37508 34830 34643 37556 37394 36082 35941 34020 38347 35692 35552 35664 38000 35669 36192 36084 37760 35753 37351 40043 37523 36232 35904 36006 38221 36849 35399 35411 37936 37915 33685 35625 35338 37840 35863 36231 36909 36889 34182 36928 37236 36224 35584 36942 35768 36480 37072 37104 33650 37828 35605 35857 35472 37345 36985 37364 36280 38788 35757 38378 33136 36920 35675 35889 36004 37299 34312 37735 35595 37383 36544 35946 35424 38051 33923 38144 34282 37908 35931 35608 35782 36933 35156 37432 35142 37868 35064 37717 35655 37136 35160 37947 34968 36818 35815 36888 35355 37120 33690 38536 36717 35840 34744 37097 35153 37066 35254 37258 34484 37313 34470 37801 34757 38320 36156 34215 34677 36792 37152 36401 32999 38039 36344 36920 35739 37915 35576 37696 35510 36369 35335 40489 34861 36428 35718 35936 34885 36690 34223 37322 36469 38458 35859 37369 33884 
21912 22257 21973 22243 21984 22187 22359 22263 22292 22169 22059 21943 22010 22199 22017 22336 22013 22078 22179 22076 21845 22221 22441 21941 22293 21870 22048 22006 22265 21948 22241 21963 22320 22168 22021 21947 22352 21888 22211 21849 22194 22033 22341 22008 22482 21792 22374 22084 22151 21924 22321 21767 22452 21800 22300 21855 22091 21867 22502 21772 22517 21593 22389 21863 22343 21863 22051 21879 22277 21699 22309 21855 22375 21888 22229 22064 22164 21784 22377 21513 22369 21693 22277 21662 22194 21933 22162 21861 22210 21791 22273 21663 22084 21716 22164 21760 22159 21689 22212 21584 22293 21520 22255 21810 22304 21767 22278 22226 22353 21536 22035 21754 22093 21728 21920 21969 22213 21818 22080 21851 22282 21804 22263 21972 21877 21927 22187 21981 22155 21632 22328 21766 22148 21877 21884 21984 21721 22211 21971 21879 22257 21735 22104 21858 22124 22006 22116 22089 22090 21569 21728 21442 21916 21629 21997 21521 21720 21572 21919 21628 21880 21464 21938 21691 21970 21536 21742 21521 22048 21591 22024 21355 21969 21608 22112 21563 21891 21484 22030 21655 22056 21615 21814 57 5133 8000 10301 11053 12619 12621 13372 13291 13763 34503 28646 26279 25625 24576 24531 23745 23872 23186 23506 23129 23284 22720 23153 22464 22871 22616 22557 22231 22623 22141 22520 22176 22448 22045 22197 21856 22372 21959 22346 21713 22343 21915 22119 21648 22208 21565 22098 22005 22056 21641 22080 21689 21854 21784 21937 21888 21876 21664 21920 21763 21863 21736 21939 21771 21837 21778 21911 21555 21981 21681 21857 21600 21817 21663 21933 21594 21872 21623 21854 21531 21856 21494 21988 21376 22055 21451 21937 21662 22036 21535 22070 21549 21980 21689 22017 21599 21909 21556 21979 21624 21916 21623 21824 21696 21927 21597 21856 21782 21598 21658 21796 21717 21733 21728 21909 21804 21719 21875 21632 21914 21767 21847 21601 21841 21831 21802 21789 21792 21947 21768 21764 21884 22266 21974 21492 22028 21632 21902 21824 21806 21751 21876 21727 22001 21629 22097 21528 22095 21633 21973 21754 21793 21843 21864 21673 22030 21480 22100 21665 21806 21743 21952 22023 22067 21546 22016 21653 21809 21733 22099 21399 22173 21627 21854 21703 22072 21703 22125 21663 21998 21674 21957 21644 22113 21581 21987 21692 21968 21616 22016 21628 5110 9859 11772 11891 13307 13224 13840 13814 14509 14325 29333 26568 25888 24892 24652 24147 24149 23690 23816 23042 23519 22842 23194 22572 23098 22414 22877 22426 22836 22535 22789 22340 22400 22188 22528 22173 22627 21949 22301 21808 22410 22408 22311 22297 22348 22018 22233 22061 22325 21942 22232 22058 22292 21818 22199 22032 22229 21976 22145 21998 22021 21854 22106 21900 22304 21934 22300 21652 21897 21980 22187 21719 22051 21947 22141 22119 21958 21993 21931 21797 21973 22060 21721 21732 22058 22167 21851 21782 22141 22036 21717 21841 22210 21815 21935 21902 22065 21721 21806 21828 22086 21790 21817 22127 21848 22080 21836 22114 21881 22396 21982 22057 21660 22054 22020 21996 21555 22006 21945 22069 21613 22106 21888 22045 21577 22138 21792 21968 21716 22204 21856 21952 22125 22090 21766 21981 21692 22132 21713 21968 21731 22078 21696 21956 21718 22139 21734 22025 21732 22177 21752 21952 21680 22178 21703 22034 21714 22162 21728 21992 21454 22167 21728 22053 21475 22078 21720 22078 21623 22115 21661 22112 21508 22176 21578 22167 21596 21990 21600 22089 21677 21984 21496 21996 21634 21933 21560 22012 21568 21721 21395 49 11063 13054 13719 14724 15025 15554 15392 16194 15851 29537 25733 24847 24141 24052 23224 23557 23125 23243 22733 22957 22625 22784 22400 22647 22358 22629 22247 22460 22166 22512 21918 22442 22147 22393 22099 21569 22175 22372 21970 22009 21984 22146 22030 21915 21867 22065 22237 22107 21682 22125 22067 22140 21760 21913 21940 22204 21611 21814 21911 22119 21826 21808 21825 22045 21873 21907 21846 22093 22447 21785 22028 21833 21944 21552 21927 21814 22144 21648 21928 21966 22089 21820 22048 22003 22016 21879 21799 21670 22040 21825 22033 21719 22035 21782 22016 21611 21935 21745 22091 21565 22081 21703 22098 21711 21917 21671 22082 21728 21969 21389 22117 21680 21965 21383 22144 21720 22103 21422 22061 21708 22165 21576 21914 21703 22117 21656 21818 21616 22075 21673 21903 21720 22148 21595 22084 21543 22029 21677 22153 21586 21905 21583 22020 21564 21646 21401 21957 21489 21806 21565 22004 21556 22023 21424 22077 21853 21887 21457 22002 21731 21794 21555 22080 21956 21990 21667 22025 21458 21982 21532 21881 21664 22094 21736 21776 21708 21915 21731 21982 21751 21892 21741 21662 21802 21928 21993 21888 21436 22057 21651 21693 12827 14950 15561 16800 16764 17097 17604 17723 17713 43636 25884 24508 23717 23468 23347 23008 22904 22720 22843 22635 22466 22184 22624 22186 22619 22255 22190 22012 22404 22218 22353 22241 22194 21999 22119 22033 22266 22028 22293 21668 22069 21968 22293 21864 22199 21727 22195 21867 22219 21763 22065 21861 22302 22243 22215 21795 22249 21988 22080 21780 22226 21562 22204 21777 22087 21639 22246 21658 22039 21730 22245 21621 22244 21792 21960 21788 22071 21623 22247 21646 22187 21606 22016 21676 22140 21405 22084 21544 22163 21716 21981 21632 22153 21553 22082 21540 22253 21524 22184 21482 22022 21804 21893 21960 22137 21612 21993 21553 22186 21655 22121 21424 21955 21628 21933 21766 22068 21780 21980 21808 21875 21587 21976 21662 21989 21596 21939 21629 22029 21543 22020 21607 21992 21560 21863 21623 22124 21756 21847 21765 21845 21865 21852 21889 21675 21922 21843 22006 21698 21870 21884 21916 21624 21744 21714 21871 21795 22089 21825 22121 21712 22007 21719 21803 21809 21925 21976 21825 21869 21943 21760 21961 21680 22036 21398 22081 21536 22102 21668 22084 21736 22088 21685 22022 21671 21859 21729 21988 21733 22087 21551 14620 18059 19321 19017 19822 19477 19801 19712 20070 19943 24562 22971 23164 22340 22855 22223 22663 22211 22580 22166 22416 21852 22450 21725 22349 21809 22192 21789 22040 21978 22209 21451 22048 21654 22132 21706 21904 21557 22183 21649 22180 21574 22080 21688 22156 21711 22203 21782 22151 22103 22088 22095 22232 21760 22188 21883 22033 21960 22102 21888 22224 21678 22075 21941 21888 21949 22008 21923 22036 21876 22039 21976 22146 21774 22023 21877 21906 21869 21894 21748 21996 21905 21862 21897 22082 21764 22028 21959 21675 21914 22165 21591 22034 21875 21664 22070 21986 21947 21942 22060 21728 22082 21959 22023 21958 22136 21909 21897 21899 22090 21728 22140 21760 22163 21653 22172 21875 21892 21719 22315 21554 22129 21808 22276 21657 22175 21815 21996 21757 22188 21716 22007 21806 22176 21554 22199 21755 22139 21514 22188 21826 21989 21689 22164 21690 21945 21841 22203 21601 22036 21531 22202 21391 22031 21688 22032 21557 22134 21732 21840 21588 22017 21445 22151 21684 22233 21506 22174 21797 22241 21521 22171 21723 22162 21925 22151 22136 22004 21629 22084 21858 21895 21728 22089 21795 21959 21789 22023 21721 21888 21735 22073 21785 21943 21736 22016 21737 21945 21749 22091 21941 21963 21713 22197 21722 21778 21829 22183 21778 21883 21922 22064 21824 22197 21732 21969 21658 21724 21685 22088 21888 21570 21975 21808 21991 21735 22216 21672 21962 21817 21889 21885 21664 21892 22038 21754 21899 21850 22047 21592 22238 21719 22097 21754 22151 21839 21976 21590 21936 21734 22113 21576 21827 21774 22149 21680 21836 21640 22184 21766 21885 21632 22151 21652 21952 21667 22159 21662 21933 21688 22238 21751 21918 21575 22229 21806 22032 21539 22286 21600 22010 21540 22076 21656 22103 21576 21986 21781 22023 21608 21965 21609 22177 21588 22007 21718 22007 21537 22176 21605 22151 21542 21741 22023 21806 21491 21829 21585 22035 21719 21957 21564 21944 21697 21815 21615 21872 21735 21879 21664 22017 21806 21877 21935 21895 21868 21687 21693 22008 21866 21705 21755 21943 21831 21578 21729 22215 21792 21767 21863 22215 21681 21656 21869 22082 21640 21769 21941 21703 21554 21790 22014 21829 22058 21767 22136 21793 22037 21825 21962 21797 21959 21992 21906 21853 22039 21517 22103 21848 21897 21832 22023 21796 22038 21703 22070 21863 21947 21831 22016 21810 22144 21862 22259 21616 22218 21812 22100 21801 21995 21861 22133 21723 22220 21724 22219 21574 22179 21607 22164 21731 22201 21689 22193 21757 22121 21782 22224 21732 22285 55 17 3665 5571 6333 7319 7602 8450 8343 9150 36146 30570 27981 27335 25921 25781 24989 24990 24493 24276 23794 23884 23560 23857 23675 23469 23079 811 8016 10040 10893 11734 12098 12747 12960 13426 13437 31345 28496 27138 26249 25634 25223 24637 24625 24467 24329 23949 23911 23588 23499 23485 23163 23394 10359 13048 13898 14983 15007 15776 15920 16146 16469 39172 28503 26415 25819 25033 24551 24512 24228 23967 23874 23699 23790 23383 23415 23231 23236 23035 23257 15236 17005 17097 18083 17847 18567 18333 18947 18844 28722 25568 25027 24304 24137 23674 23792 23440 23380 23173 23169 22976 23086 22818 23090 22720 22990 16329 19681 19700 20352 20135 20636 20352 20774 20457 20994 24560 23975 23287 23365 22851 23266 22608 22961 22578 22898 22456 22784 22456 22685 22569 22656 22315 22619 22279 22542 22242 22579 22289 22491 22208 22344 21986 22434 22144 22616 22466 22406 22109 22447 22036 22492 22002 22466 22109 22452 21998 22356 21935 22327 22077 22320 22064 22100 22148 21600 22273 22060 22120 22051 22127 22168 21958 22297 22026 22370 21788 22332 21825 22355 22004 22189 22131 22057 22276 21922 22157 21879 21957 22113 22235 22116 22317 22023 22167 22085 21996 22212 22243 22094 22279 21364 22241 21768 22333 21931 22347 21965 22085 22132 22038 22073 22325 21899 22282 21768 22323 21913 22280 22001 22054 21937 22148 21894 22314 21845 22401 21810 22288 21874 22060 21942 22190 21863 22306 21794 22403 21915 22136 21938 22222 21736 22280 21707 22218 21853 22328 21876 22248 21778 22241 21805 22262 21824 22043 21799 22185 21748 22225 21706 22080 21899 22148 22152 22136 21776 22252 21667 21802 21920 22121 21760 22260 21893 22178 21955 22152 21815 22128 21925 22165 21767 22184 21973 21902 22106 22104 21688 22017 21853 22119 21968 22193 21955 22151 22006 21976 22037 22135 21739 22048 21852 21916 21944 21906 21794 22086 21961 21840 21990 21950 21831 22016 22000 21959 22359 21764 22182 21916 21856 21975 22007 21855 22032 21974 21929 21921 22119 21872 22051 22001 22124 21979 22168 21848 22208 21981 22103 21649 22280 21812 21972 21904 22255 21745 22145 21842 22122 21643 22232 21703 22033 21897 22234 21527 22269 21835 21996 21881 22222 21732 22156 21841 22113 21097 22265 21704 22096 21635 22187 21648 22113 21675 22106 21593 21981 21862 22064 21740 22146 21624 22092 21624 22241 21739 22150 21859 22183 21607 22161 21531 22091 21801 22066 21850 22184 21852 22091 21834 22135 21696 22084 21944 21966 21843 22151 21665 22029 21934 22002 21868 22125 21829 22019 21851 22101 21941 21923 22135 21809 21825 22007 21971 21894 21914 22016 21527 22022 22115 21959 21892 22128 21680 21921 22097 21802 21809 22241 21945 21789 22007 21848 21897 21963 22197 21687 22154 21962 21968 21975 22145 21904 22032 22016 22109 21684 22171 21937 22000 21881 22121 21637 22083 22064 21995 21839 22248 21659 22084 21861 22019 21928 22183 21600 22256 21849 21995 21867 22268 21592 22213 21722 22273 21860 22077 21736 22224 21765 22179 21629 22200 21655 22203 21809 22209 21779 22092 21802 22220 21689 22195 21642 21940 21808 22162 53 4368 5997 7482 7735 8807 8727 9747 9473 43622 30802 28696 26980 26502 25317 5149 10615 12247 12731 13395 13356 14151 14140 14566 14478 31104 28297 27428 26184 25968 6496 14731 15490 16446 16490 16844 17021 17442 17260 17565 29784 27734 26482 25741 25148 24868 17609 18711 18771 19015 19384 19730 19497 19632 19607 29363 26148 25224 24652 24759 24207 20196 20790 21376 21329 21295 21171 21627 21197 21481 21523 24591 24313 23705 23949 23563 23945 23094 23783 23344 23139 23140 23217 23175 22965 22984 23094 22688 23127 22727 22780 22635 22881 22528 22887 22606 22800 22503 22831 22247 22784 22479 22553 22466 22709 22259 22790 22327 22661 22336 22480 22240 22710 22054 22790 21910 22654 22160 22494 22247 22515 22139 22685 21934 22605 22407 22622 22199 22390 22163 22616 22029 22458 21860 22470 21952 22521 21925 22421 21959 22344 22171 22218 22065 22421 21911 22501 21623 22501 21804 22408 21841 22374 21910 22330 22008 22309 21945 22412 22040 22080 22125 22151 21619 22256 21920 22180 22007 22150 21931 22297 22001 22249 21959 22133 21831 22305 21794 22204 22027 22272 22023 22366 21868 22300 
22055 21904 22016 21867 22157 21785 22272 21654 22169 21915 22188 21608 22390 21626 22283 21587 22073 21728 22196 21614 22352 21984 22025 21667 22166 21582 22181 21573 22133 22017 22080 21712 22139 21422 22290 21505 21863 21796 21832 21453 22119 21687 22158 22149 22080 21813 22032 21701 22157 21715 22110 21923 22428 21891 22137 21581 22142 21765 22089 21869 21834 22267 22086 21883 21882 21687 22354 21792 21895 21831 21854 21945 21929 21728 22258 21788 21965 21841 21923 22226 21927 21848 21960 21799 22475 21807 21725 22589 21583 22235 21968 22076 21768 21954 21899 22133 21559 22320 21677 22001 22035 21971 21995 22092 21757 22343 21671 22332 21640 22144 21990 22045 21879 22199 21861 22323 21355 22371 21744 22198 21856 22049 21797 22160 21816 22195 21569 22395 21415 22347 21636 22129 21825 22033 21840 22144 21720 22354 21559 22432 21644 22236 21793 22016 21891 22040 21741 22122 21719 22242 21529 22157 21599 22164 21829 22206 21924 22101 21826 21995 21696 22036 21477 22027 21425 22379 22069 21983 21827 22109 21858 22138 21515 22080 21717 22293 21610 22224 21662 21952 21869 22193 21864 22077 21667 22103 4905 6358 7507 7501 8006 8182 9319 30555 27396 25336 25056 23824 23228 22647 22692 22087 22139 21475 21756 21174 21139 21756 20604 21036 21213 21493 21656 21712 20864 21941 21268 21840 21440 21586 21619 21472 21629 21614 21386 21580 21320 21623 21334 21760 21295 21687 21220 21848 21217 21814 21143 21879 21191 21877 21286 21770 21065 21848 21191 21877 21072 21844 21157 21936 21081 21809 21147 21847 21111 22037 21209 21880 21208 21893 21728 21867 21241 21945 21171 21849 21239 21809 21325 21781 21312 21744 21421 21808 21487 21700 21452 21629 21441 21530 21441 21617 21504 21577 21459 21643 21440 21628 21405 21836 21239 21787 21269 21739 21195 21742 21330 21506 21384 21525 21232 21849 21119 21459 21567 21897 21129 21911 21146 21756 21436 21883 21045 21829 21372 21552 21280 21732 21351 21744 21255 21545 21447 21915 21234 22045 21024 21830 21490 21391 21875 21514 21712 21696 21325 21829 21571 21658 21405 21749 21453 21494 21466 21902 21269 21767 21414 21708 21639 21445 21468 21990 21242 21463 21466 21458 21707 21906 21809 21537 21650 21623 21467 21785 21562 21564 21568 21456 21771 21671 21498 21687 21527 21657 21517 19687 19824 19902 20296 20180 20213 20631 20152 20164 23197 22560 22231 22264 22048 21888 22464 21799 22073 22083 22299 21729 22276 21834 21859 21971 22211 21687 21920 21893 21957 22068 21946 21778 21749 21728 22002 21445 21943 21877 22000 21360 22064 21737 21751 21629 22217 21553 21757 21745 22069 21430 22075 21703 22096 21336 21993 21681 21896 21362 22073 21576 21755 21517 22123 21470 21766 21559 22155 21424 22047 21681 22076 21241 22025 21672 21963 21429 22023 21699 22007 21255 22034 21697 21881 21410 22095 21590 21852 21518 22215 21433 21960 21362 22100 21584 21341 21373 21890 21427 21869 21547 21952 21559 21782 21587 22052 21428 21904 21478 22112 21441 22073 21719 22114 21428 21882 21777 21900 21325 21808 21397 22020 21607 21895 21980 21962 21577 21875 21481 21931 21543 22023 21575 21895 21552 21903 21720 22029 21488 21906 21412 22194 21519 21973 21576 21527 21662 21801 21613 21330 21570 21925 21597 21815 21568 21768 21819 21457 21624 21865 21955 21776 21700 21719 21842 21655 21555 21672 22103 21560 21527 21738 22183 21624 21581 21707 21981 21796 21345 21925 21931 22107 21690 21879 22247 21888 22198 21863 22154 21892 22006 21781 22116 21920 21905 21840 22098 22026 21935 21672 22058 22130 22038 21648 22170 21829 22158 21624 22200 21793 22263 21653 22167 22016 22198 21600 22161 21930 22391 21533 22018 21729 22324 21722 21415 21805 22309 21734 22020 21748 22343 21825 22029 21687 22388 21736 22144 21716 22241 21937 22123 21723 22208 21899 22212 21546 22231 21827 22376 21556 22383 21680 22503 21700 22186 21673 22134 21817 21984 21748 22218 21633 22224 21618 21955 21849 22264 21320 22067 21632 22310 21624 22085 21555 22202 21537 22027 22113 22270 21916 21995 21722 22300 21586 21882 22033 22104 21946 22103 21782 22083 21850 22133 21735 22103 21690 22283 21598 22071 21751 22144 22048 21832 21790 22002 22200 21704 21752 22170 22359 21969 21946 21806 21644 22419 21642 21962 21713 22120 21809 21952 21715 22003 22156 21873 21801 21850 22245 21792 21856 21770 22375 22031 21879 21979 22356 21726 21863 21713 22044 21847 21897 21796 22168 21953 21898 21671 22200 22009 22023 21757 22256 21890 21966 21696 22262 21601 22095 21987 22078 21843 22357 21586 22455 21793 22260 21833 22003 21757 21907 21840 21869 21844 22323 21798 22178 21715 22339 21575 22277 21736 21995 21806 22343 21528 22322 21831 22520 21731 22358 21767 21988 21785 22352 21570 22073 21601 22177 21426 22354 21701 22072 21657 22087 21842 22284 21767 22112 21536 22131 21632 22146 21771 21850 21705 22202 21693 22279 21592 22110 21709 22134 21532 22310 21875 22167 22476 21923 21901 22087 21561 22190 21777 22080 21839 22051 21639 22156 21741 21727 21645 22290 21936 21643 22173 21770 21664 21906 22263 21926 21792 22265 21828 21878 22216 22034 21662 22245 21735 21893 22216 21927 21761 22059 21794 22161 21821 21905 22306 21980 21798 22240 21643 21681 22247 21777 22144 21641 22198 22103 21858 21972 21912 21947 22155 21653 22208 21541 22208 21711 22151 21815 21991 21997 21983 22049 22019 21886 22172 21740 22282 21655 22423 21543 22377 21561 22276 21812 22301 21796 22278 22070 22317 22087 22410 21639 22464 21615 22379 21613 22294 21507 22308 21476 22389 21504 22310 21549 22369 21635 22315 21580 22235 21705 22057 21753 22231 21658 22305 21861 21876 22023 22128 21681 22049 21639 22332 21735 22248 21639 22247 21490 22250 21747 22199 21638 22278 22167 22102 21617 21354 22202 22073 21687 21987 21776 22185 21745 22247 21703 22176 21504 22101 21940 21941 22104 21888 21978 21716 21896 22159 21733 22384 21625 21949 21935 21808 22231 21995 21913 21771 21739 22394 21838 22016 21664 21987 22265 22138 21842 21785 21559 21851 21879 22069 22272 21559 22234 21683 22167 22040 22133 21949 22083 21866 22263 21553 22133 22005 21957 21808 22117 21248 22295 21770 21979 21777 22053 21784 22334 21547 22350 21755 21938 21973 22199 21754 22313 21824 22406 21890 22240 21863 22376 21639 22208 21767 22242 21736 22316 21687 22171 21858 22025 21635 22409 21648 22276 21805 22272 21568 22214 21746 22263 21776 22176 21575 22024 21765 22067 21583 22227 21640 22102 21676 22273 21720 22231 21557 22201 21687 22169 21606 22036 21352 22206 21672 22199 21991 22074 21781 22176 21747 21963 21923 22011 21564 22235 21810 21906 21688 22193 21905 22016 21936 22325 21797 22103 22057 22032 21635 21792 22187 21764 21811 22120 21945 21836 21783 22232 21750 21830 21961 22059 21721 21874 22320 21975 21856 22043 22221 21736 22388 21943 22089 21945 22371 21618 22055 22017 22187 21632 22102 22071 22227 21616 22101 22013 22177 21581 22205 21962 22016 21558 22217 21953 22136 21700 22388 21895 21982 21762 22236 21808 21945 21677 22336 21692 21922 21680 22368 21713 22050 21562 22347 21696 21964 21684 22258 21783 22242 21787 22264 21596 22090 21679 22336 21689 22263 21572 22244 21723 22162 21684 22241 21755 22322 21746 22237 21696 22243 21640 22317 21429 22081 21900 22220 21335 22197 21637 21728 21381 21792 21822 22240 21794 22033 21767 22056 21794 21960 21963 22117 21678 22062 21672 22152 21728 22094 21799 22062 21789 22327 22007 22162 21499 21817 21718 22187 21907 21952 21792 22101 22129 21982 21825 21876 22012 21675 21801 22009 22166 21836 21670 21799 22258 21848 21745 21750 22423 21734 22245 21945 22458 21648 22171 22128 22277 21623 21947 21893 22136 22028 21860 21739 22319 21707 22177 21712 22245 21824 22018 21760 22322 21776 21863 21748 22164 21952 21993 21249 22259 21899 22081 21717 22291 21848 22125 21451 22197 21769 22247 21703 22369 21882 22121 21616 22375 21763 21941 21667 22417 21742 22064 21838 22336 21584 22221 21611 22381 21666 22038 21793 22058 21720 22231 21955 22241 21601 22262 21516 22116 21760 22221 21585 22215 21531 22055 21391 21978 21696 22106 21851 22309 21765 22264 21845 21912 21808 22081 21701 22000 21641 22045 21442 22005 21719 21932 21939 22064 21792 21904 21805 22213 22020 21991 21701 21880 22071 21952 22160 21933 22293 21993 22004 22126 21953 21798 21703 21898 21803 22007 21884 22220 21667 22309 21784 22234 22257 21978 22071 21905 22125 21888 21990 21757 21847 22039 21799 22134 21841 22044 21965 21997 21959 22030 21992 21943 21977 21925 22019 21943 22117 21989 22119 21857 22167 21828 22182 21835 22197 21768 22065 21728 22203 21803 22291 21685 22212 21602 22445 21536 22411 21418 22327 21642 22187 21769 22092 21877 22087 21801 22018 21896 22445 21740 22188 21814 22224 21840 22174 21709 22071 21568 22267 21594 22209 21452 22241 21589 22133 21569 21878 21641 21895 21718 22538 21777 22135 22200 21683 21624 22293 21785 22152 21685 22099 21733 22071 21776 21934 22253 22279 21644 22056 21744 22221 21854 21944 21987 21710 21848 21849 21730 21778 21840 21962 21539 21800 21776 21760 21747 21776 21633 21739 21888 21845 21789 21916 21933 21937 21894 21874 22615 21756 22401 21594 22392 21714 22282 21868 22166 21899 22182 21883 22033 21981 21969 21952 22264 21868 21916 21981 21888 21824 21928 21887 21986 21804 22260 21583 22263 21756 22278 21478 22403 21623 22272 21532 22359 21698 22184 21688 22213 21712 22217 21768 22055 21923 21883 21907 22155 21770 22198 21617 22373 21723 22304 21580 22221 21726 22022 21713 22068 21747 22114 21708 22269 21585 22346 21436 22188 21815 22102 21536 22192 22050 22162 21684 22085 21416 21911 21717 21845 21575 22122 21649 22182 21830 22064 21853 22045 21699 22032 21684 22190 21776 22183 21573 21893 21888 21936 21908 21771 21965 22309 21881 21863 21927 21970 21921 21751 21782 22276 21729 21967 21859 21877 22255 21803 21612 22172 21796 21763 21605 21960 22251 21373 22462 21766 22035 22067 21978 21781 22258 21800 22183 21841 22069 22040 22036 21719 22238 21637 22092 21946 21878 21798 22196 21575 22423 21821 22235 22004 22162 21779 22368 21623 22245 21845 22057 21761 22307 21640 22336 21692 21976 21753 22208 21782 22336 21644 22281 21897 22017 21688 22325 21626 22259 21655 22243 21425 22177 21706 22148 21767 22107 21602 22101 21593 22182 21822 22016 21507 22144 21600 22136 21542 22231 21581 22192 22103 22337 21698 22400 21472 22065 21703 22157 21751 22173 21854 22080 21800 22010 21804 22208 21571 21904 21795 22163 21742 22050 21799 21912 21860 22162 21544 22040 22280 21930 21831 22313 21792 21847 22079 21927 21678 21895 22060 21717 21704 22221 21729 21751 21970 21966 21778 21791 22464 21664 22202 21826 21870 21976 22318 21749 22052 22045 22090 22157 22144 21856 22151 22031 22242 21607 22347 21829 21904 21851 22227 21735 22247 21934 22142 21836 22329 21847 22072 21785 22323 21483 22263 21835 21947 21683 22378 21595 22046 21881 22293 21451 22380 21805 22039 21659 22320 21671 22081 21872 22137 21705 22409 21706 22113 21612 22397 21536 22114 21800 22214 21596 22208 21591 22140 21633 22106 21952 22192 21680 22093 21411 22144 21555 21834 21815 22295 21848 22196 21892 21920 21737 22133 21543 22022 21677 21981 21664 22061 21805 21948 21798 22016 21788 22179 21744 22016 21868 22045 21756 22247 21523 22152 22341 21940 21874 22235 21716 22125 21589 21959 22093 21873 22280 21897 22272 21789 22022 21783 21649 22075 21648 21862 22349 21753 21969 22265 21779 21760 22105 21969 22241 22007 22080 21679 22139 22040 22265 21787 21888 21869 22243 22115 22029 21609 22247 22033 22214 21685 21873 21668 22354 21815 22073 21645 22241 21870 22312 21734 22127 21858 22294 21723 21989 21735 22369 21836 22080 21466 22253 21878 22341 21581 22029 21765 22368 21621 22032 21650 22400 21795 21911 21616 22383 21898 22016 21424 22321 21920 22147 21594 22352 21645 22107 21597 22311 21715 22180 21745 22071 21675 22200 21783 22151 21618 22201 21833 22266 21447 22326 21533 22075 21672 22215 21691 22225 22158 22307 21405 21872 21686 21952 22098 22103 21723 22233 21975 21941 21803 22000 21574 22009 21750 22164 21967 22090 21659 22097 22130 22333 21848 21644 22064 21976 21943 21903 21668 22272 21555 22154 21601 21842 22279 21894 21960 21863 21664 22272 21788 22283 21813 21751 21955 21720 22080 21911 21920 21957 22167 21592 22004 21853 22215 21637 22326 21731 22006 21988 21995 21954 21904 22060 21991 22082 22146 21683 22359 21545 22260 21707 22300 21804 22006 21981 22130 21841 22153 21911 22157 21717 22294 21664 22333 21468 22412 21650 22288 21693 22256 21769 22306 21817 22100 21792 
