# Supplementary material for: An Active Feature Selection Strategy for DWT in Artificial Taste
Source: Hindawi journal article supplement (doi:10.1155/2018/9709505), 2018-01-01
Supplement: f1 [file 9709505.f1.zip › beer-hi-2.txt]

21911 22000 21461 21865 21824 21921 21573 22108 21728 21975 21624 22055 21805 22093 21666 22368 21678 21838 21902 21942 21495 21952 21989 21853 21427 22157 21765 21975 21504 22151 21612 21717 21735 22214 21667 21781 21725 22018 21573 21908 21778 22057 21728 21984 21969 22016 21731 21784 22209 21688 21755 21997 21888 21928 21722 22168 21704 21769 22087 21803 21717 21880 21991 21987 21804 22101 21628 21888 22114 21802 21583 21828 22184 21613 21921 21969 22096 21415 22225 21645 22051 21902 22094 21508 22072 21877 22008 21784 22284 21636 21800 21981 21976 21472 22197 21882 21703 21784 22144 21569 22104 21929 22023 21679 22137 21669 22234 21795 22016 21684 22378 21601 22065 21895 22087 21576 22165 21674 21882 21991 22052 21604 22298 21703 22076 21881 22100 21680 22288 21373 22136 21788 21840 21664 22179 21456 22326 21671 22055 21751 22033 21643 22315 21401 22166 21785 21999 21760 22256 21428 22345 21488 22017 21704 22130 21584 22320 21294 22253 21589 21999 21679 22068 21633 22272 21415 22184 21687 21898 21689 22087 21644 22236 21493 22145 21760 22020 21788 22144 21485 22316 21662 22240 21681 21992 21577 22034 21674 22182 21380 22139 21609 22250 21578 22004 21560 21991 21627 22071 21596 22121 21523 22144 21648 22054 21734 21867 21688 22160 21645 22157 21297 22148 21849 22165 21633 21914 21601 21990 21552 22153 21556 21678 21805 22109 21739 21752 21504 22154 21211 22196 21617 22076 21591 21817 21603 21928 21894 22141 21941 22066 21691 21930 21721 21898 21873 21831 21543 22048 21676 22070 21664 21894 21669 21933 21761 22023 21617 21993 21537 22054 21960 21895 21729 21385 21865 21838 21650 21988 21742 22166 21655 21826 21676 21664 21865 21751 21744 21920 21669 21856 21738 22176 21831 21999 21604 21700 22264 21781 21764 21609 21649 21943 21534 22161 21847 21868 21785 21744 21728 21153 22130 21737 21879 21799 21760 22242 21636 22165 21734 21760 21702 21687 22108 21718 22055 21749 21753 21917 21575 22199 22197 21714 21991 21751 22113 21708 22057 21728 22010 21654 22221 21806 21896 21687 21974 21547 22108 21575 22284 21704 22016 21796 21801 21703 21883 21798 22044 21725 22027 21610 22214 21529 22304 21414 22250 21696 22046 21677 21991 21836 21864 21920 22173 21614 22233 21636 22224 21703 22254 21555 22103 21671 21963 21760 21945 21794 22032 21752 22140 21620 22178 21513 22247 21381 22235 21544 22167 21639 22001 21798 22202 21703 22136 21641 22258 21520 22320 21565 22284 21527 22181 21720 21964 21688 22115 21717 22167 21473 22187 21556 22144 21617 22134 21742 22029 21747 21929 21777 22182 21499 22336 21463 22259 22110 22200 21532 22160 21536 22071 21657 21933 21671 22108 21600 22200 21531 22005 21733 22060 21529 22119 21463 22287 21574 22023 21543 22069 21591 22208 21407 22143 21552 22134 21488 22009 21511 21826 21408 22124 21379 22144 21572 22089 21498 21852 21782 21920 22039 22199 21481 22091 21512 22040 22054 21859 21913 21959 21734 22016 21712 22035 21725 21902 21740 21809 21613 21965 21609 22131 21768 22109 21818 21893 21458 22057 21547 21825 21863 21719 21509 21953 21857 21906 21900 21680 22109 21802 21623 22009 21591 21797 21891 21760 22046 21834 21960 22256 21711 21796 21872 21677 21765 21738 21685 22222 21735 21643 21907 21785 21731 21987 21806 21664 21653 22133 21585 21610 21804 22404 21636 21751 21865 21783 22181 21620 22176 21709 21902 21723 22044 21642 22368 21825 22028 21514 21960 21964 22134 21626 21719 21456 21900 21504 21826 21597 21892 21713 21973 21648 21947 21663 21996 21685 21985 21589 22024 21484 21961 21493 21671 21523 22105 21712 22096 21904 22146 21623 21881 21364 22081 21769 22293 21689 22272 21536 21941 21585 22253 21764 22226 21619 22059 21405 21877 21496 22112 21760 22336 21735 22246 21591 22086 21424 22162 21490 22148 21585 22256 21719 22410 21704 22341 21744 22264 21718 22113 21734 22056 21453 21901 21424 21921 21443 22111 21576 22313 21435 22144 21619 22090 21379 22211 21463 22312 21576 22066 21558 22025 21554 21967 21536 22023 21636 22209 21720 22168 21664 22042 21610 22135 21636 22051 21513 22005 21433 22295 21431 22036 21623 22019 21588 22163 21622 22004 21746 22004 21708 22023 21381 22154 21650 22179 21707 22056 21738 21605 21889 21856 21686 22087 21975 22009 21947 21911 21766 22037 21709 22098 21597 22066 21367 22035 21724 22035 21624 21837 21649 21920 21575 22103 21738 21985 21674 22021 21459 22048 21662 21937 21625 21696 21879 22088 21770 21872 21392 21732 22225 21858 21726 21696 21583 22273 21729 21753 21749 21920 22055 21639 21644 21710 21981 22220 21688 21770 21764 22276 21838 21744 21896 21869 22153 21898 21527 21831 21991 22002 21702 21763 21997 21888 21805 21825 21962 21876 21726 21667 21951 21561 22368 21524 22016 21960 21863 21440 22012 21760 22049 21472 22246 21904 21998 21697 21997 21916 22016 21557 22071 22032 21971 21496 22087 21901 22052 21760 22236 21704 21926 21659 22305 21617 22048 21777 22176 21489 22019 21858 21925 21654 22241 21792 21888 21740 22112 21589 22076 21721 22167 21467 22229 21730 22009 21399 22327 21706 21967 21678 22326 21776 22118 21716 22083 21544 22263 21721 22027 21644 22345 21435 22141 21681 22111 21506 22387 21418 22091 21655 22215 21469 22247 21604 22005 21700 22183 21534 22117 21747 21976 21591 22311 21604 22026 21717 22296 21516 22056 21737 22212 21671 22194 21453 22155 21408 21961 21546 22225 21521 22008 21624 22036 21518 22152 21600 22010 21808 22241 21550 22062 21532 22025 21596 22242 21415 22020 21601 22119 21347 22173 21460 21980 21672 22031 21773 22006 21735 22080 21666 22199 21521 21932 21655 21940 21741 21492 22058 22000 21972 22000 21670 21993 21726 22105 21611 21830 21696 22096 21444 21980 21632 21888 21708 22051 21733 21865 21774 21956 21543 21978 21554 21813 21800 21862 21771 22000 21829 21738 21973 21873 21684 22157 21588 21747 21813 21835 21961 21690 21676 22056 21677 21754 21880 21815 21735 21902 21590 21785 21908 21724 21654 22012 21861 21660 21969 21816 21548 21933 21822 21673 21842 21769 21640 21825 21985 21749 21929 22139 21735 21722 21979 21774 21828 22209 21656 21840 22387 21858 21705 21867 22116 21688 21996 21883 21432 21522 22263 21738 21848 21912 22047 21488 22084 21816 21918 21888 22060 20970 21998 21864 21915 21536 22022 21847 22044 21716 22242 21506 22016 21912 21985 21720 22088 21686 21814 21765 22144 21576 22020 21905 22131 21357 22301 21862 22044 21509 22166 21608 21843 21675 22152 21691 21993 21561 22233 21646 21960 21676 22305 21541 22005 21627 22300 21712 22312 21555 22185 21713 22267 21618 21949 21428 22113 21749 22226 21761 22097 21544 22128 21341 22161 21601 22158 21664 22208 21740 22244 21785 22288 21659 22232 21801 22262 21831 22228 21788 22257 21797 22293 21734 22246 21612 22176 21544 22174 21463 22046 21436 22108 21373 22080 21623 22008 21628 22135 21518 22087 21741 21998 21594 22116 21577 22009 21588 22105 21507 22138 21720 22120 21472 22194 21517 22002 21915 21969 21563 22045 21490 22237 21540 21965 21883 22128 21549 21614 21914 22171 21816 21911 21359 22114 21457 22117 21576 21847 21619 21990 21603 21952 21452 21905 21688 21952 21703 21947 21705 21871 21715 22050 21722 21880 21719 21988 21698 22080 21768 21907 21530 22186 21750 21890 21761 21941 21864 22026 21722 21847 21468 21920 21740 21751 21560 22032 21745 22000 21665 21814 21797 22019 21906 22196 22193 22330 22110 22179 22168 22167 21945 21888 21915 22017 22137 22135 22096 22184 22216 22166 22189 22176 22162 22219 22024 22035 21888 21719 21741 21833 21739 21706 21819 21692 21708 21713 21680 21848 21969 21707 21901 21844 22265 21877 22227 21764 22093 21478 21866 21440 22071 21524 22080 21859 22086 21778 22194 22018 22021 21598 21711 21512 21916 21788 22124 21848 22184 21784 22112 21689 21937 21537 22236 21743 22197 21891 22085 21688 21738 21685 22039 21787 22247 21760 22085 21556 21895 21625 22175 21771 22201 21541 22280 21334 22103 21784 22138 21793 22032 21462 22036 21641 22316 21712 22107 21536 22065 21641 22247 21691 22100 21450 22191 21717 22319 21562 21931 21448 22197 21818 22128 21549 21940 21648 22282 21736 22109 21461 22038 21792 22183 21533 21959 21584 22185 21818 22037 21546 22100 21601 22048 21528 22116 21669 22074 21445 22219 21595 22129 21560 21975 21559 22234 21648 21965 21526 22072 21645 21938 21811 22215 21585 21973 21533 21907 21709 22118 21463 22056 21595 22048 21495 22086 21677 22059 21568 22229 21749 21943 21751 21859 21655 21971 21638 21979 21632 22027 21667 22327 21718 22108 21673 22035 21711 22016 21573 21898 21788 21888 21569 21965 21806 22009 21621 21902 21812 21981 21537 21912 21931 21896 21597 21860 21909 21832 21688 21715 21991 21889 21699 21830 21888 22004 21786 22110 21832 21920 21716 22227 21760 21688 21660 22136 21667 21685 21721 22165 21647 21838 21810 22025 21652 22020 21927 21889 21705 21774 22154 21779 21708 21992 21952 21844 21765 22186 21684 21729 21792 22087 21733 21637 21800 21904 22098 40567 32728 30104 28738 27782 27736 26733 26804 23721 25265 24695 25360 25015 25210 24816 25197 24777 24886 26213 26050 25385 25519 25202 25352 24744 25282 24881 24924 24669 25184 24264 25068 24609 24959 24332 24911 24434 24768 24477 24833 24104 24783 24308 24757 24136 24912 24416 24555 24225 24676 23909 24759 24042 24458 24154 24760 23878 24613 24145 24568 23958 24651 23921 24443 23965 24658 23696 24715 23928 24401 23872 24652 23691 24369 23949 24407 23709 24559 23911 24224 23881 24551 23696 24359 23936 24348 23697 24506 23862 24202 23719 24472 23680 24467 23534 24257 23576 24451 23606 24236 23732 24298 23655 24160 23837 24088 23721 24320 23605 24612 23620 24284 23460 24183 23652 24357 23541 24280 23561 24060 23521 24241 23607 24390 23645 24181 23685 24016 23774 24224 22995 24124 23719 24161 23552 24175 23715 24103 23700 24097 23572 23980 23784 24128 23573 23969 23687 24053 23641 23926 23778 24036 23635 24131 23680 24097 23651 24024 23729 24076 23764 23958 23693 24012 23767 23714 23746 24144 23674 23877 23565 23841 23949 23748 23613 23792 23831 24278 23926 23904 23885 23814 23990 24159 23796 23812 23721 24186 24051 23872 23640 23755 23828 24245 23887 23811 23628 23728 23872 24176 23855 23865 23761 23677 23751 23879 24185 23824 23655 23457 24165 23717 24263 23781 24080 23529 24066 23824 24108 23741 23808 23657 24049 23792 24020 23737 24013 23573 24010 23739 24212 23780 24129 23424 24042 23701 24281 23656 24116 23489 23944 23705 24277 23752 23994 23416 24104 23629 24181 23703 24184 23408 23911 23481 24112 23744 24252 23557 23692 23399 24058 23557 24228 23671 24237 23243 24000 23539 24307 23620 24199 23223 23946 23376 24291 23608 24328 23517 23987 23362 24166 23542 24180 23594 24064 23343 24023 23568 24282 23604 24036 23304 24088 23463 24192 23520 24025 23373 24162 23512 24192 23491 24010 23703 23973 23483 24039 23504 23928 23456 24036 23462 24087 23559 24055 23365 23989 23341 24068 23313 24016 23462 23959 23296 23983 23514 24028 23416 24001 23431 23337 23477 23964 23496 24001 23531 23863 23484 23751 23502 24089 23558 23874 23537 24219 23462 23885 23640 23932 23532 23859 23440 23919 23452 23993 23649 23828 23608 23727 23371 23874 23642 24032 23646 23758 23652 23720 23540 23812 23873 23811 23676 23632 23756 23492 23792 24087 23776 23790 23552 23853 23496 23941 23892 23751 23674 23526 23570 23798 23734 24072 23781 23708 23380 23500 23664 23924 23834 23674 23591 23608 23564 23479 23868 23653 24045 53 16926 19370 21376 21602 22294 21969 22289 22091 22492 37264 27727 25725 25234 24429 24613 18665 22064 22260 22916 22339 23063 22799 23357 22915 40177 26422 25395 24474 24865 24313 19549 21873 23028 22754 23516 23114 23540 22829 23532 23121 26661 24774 24839 23901 24501 17511 23097 22897 23544 22808 23670 23168 23926 23143 23944 25309 24886 24033 24587 23906 24323 22770 23687 23392 23985 23416 24297 23136 23976 23356 26149 23777 24283 23515 24439 23575 24243 23488 24222 23456 24321 23620 24103 23383 24013 23524 24169 23404 24064 23223 23888 23473 24061 23380 24096 23372 24044 23632 23981 23357 24080 23436 24076 23554 23864 23501 23960 23511 23891 23533 23936 23484 23794 23607 23991 23510 23810 23442 23644 23497 23984 23522 23788 23741 23688 23631 23876 23623 23633 23512 23616 23857 23707 23576 23634 23375 23927 23789 23710 23450 23777 23489 24064 23808 23670 23559 23602 23671 24002 23705 23738 23441 23452 23591 24009 23792 23773 23473 23462 23694 23690 23834 23714 23855 23281 23785 23537 24096 23628 23900 23429 23883 23659 24011 23684 23619 23435 23940 23719 24039 23479 23936 23399 23978 
21472 21793 21506 21815 21427 21804 21428 22039 21591 21946 21714 21920 21561 21943 21546 21840 21575 21833 21601 21793 21489 21687 21557 21703 21542 21715 21405 21807 21616 21650 21490 21681 21369 21658 21579 21796 21581 21344 22007 21038 21982 21464 22023 21093 22020 21531 21750 21396 22096 21353 21943 21342 22272 21296 22043 21398 22182 21221 22209 21175 21923 21413 21959 21361 22114 21326 22080 21325 22057 21350 21895 21341 21984 21751 22011 21651 21736 21384 21914 21276 22083 21291 21833 21122 22138 21129 21835 21296 22010 21004 22208 21320 21863 21296 21965 21112 21949 21236 21722 21209 22064 21166 21917 21267 21943 21104 21934 21597 21826 21513 21973 21212 22038 21525 21785 21313 21994 21821 22042 21773 21695 21466 21904 21385 21995 21314 21853 21454 21870 21456 22012 21474 21851 21596 21971 21507 21873 21260 21944 21655 21728 21550 21869 21489 22133 21454 21930 21681 22074 21735 22160 21427 22214 21525 21543 21521 21968 21463 21975 21233 21989 21776 21428 22030 21656 21767 21785 21600 22024 21777 21560 21905 21721 21380 21984 21942 21961 21644 21779 21923 21813 21518 21848 21259 65 6760 14136 17302 18461 19597 19726 19917 20480 20043 40375 25952 23762 23282 22477 22805 22199 22058 21720 22299 21634 22353 21648 22199 21664 22080 21799 22038 21804 22308 21412 22266 21390 22201 21822 21783 21908 22339 21840 22073 21640 22147 21585 22005 21741 21833 21653 22031 21683 22189 21344 22166 21464 22228 21601 21952 21496 22005 21639 22149 21459 22048 21635 22101 21545 22056 21449 22103 21504 22263 21289 22312 21468 22048 21568 22051 21590 21995 21430 22191 21325 22229 21414 22137 21496 22032 21601 21998 21519 22174 21371 22359 21257 22272 21383 22263 21482 22017 21449 22029 21417 22272 21230 22241 21333 22220 21431 22155 21537 21917 21575 22007 21543 22153 21472 22259 21275 22240 21348 22216 21504 22108 21352 22025 21484 21847 21248 22089 21289 22199 21315 22037 21415 22116 21413 22135 21393 21857 21429 21784 21540 22181 21224 22119 21147 22070 21073 22120 21233 22103 21234 22238 21586 22146 21369 22180 21155 22107 21383 22279 21614 21893 21703 22045 21493 21944 21546 21808 21486 22154 21484 21667 21355 21611 21840 22222 21389 21900 21696 22081 21648 21981 21589 21786 21485 21952 21409 21793 21383 22019 21382 63 11988 18830 20375 20720 20600 21450 20764 21187 20951 43357 24846 23265 22313 22343 21833 21969 21965 21590 22037 22113 21893 21848 21826 21958 21475 22258 21636 21980 21879 21893 21666 21921 21845 21798 21710 21937 21488 22113 21637 22016 21660 21576 21929 21523 21828 21729 21796 21653 21489 21929 21601 22007 21561 22083 21680 21716 21857 21557 22228 21723 21754 21892 21664 21658 21971 21495 22062 21468 22259 21458 22097 21476 21931 21848 21720 21748 21984 21672 22160 21395 22128 21433 21947 21664 21777 21738 21838 21695 22115 21352 22151 21584 22059 21587 22004 21666 21853 21627 21932 21487 22202 21459 22001 21653 21859 21448 21986 21472 22369 21143 22295 21539 21979 21533 22177 21376 22160 21288 22083 21697 21879 21516 22336 21225 22286 21393 21996 21562 22116 21396 22244 21233 22288 21479 22189 21449 22245 21333 22161 21492 22042 21576 21958 21460 22249 21447 22114 21658 21834 21573 22240 21296 22242 21476 22086 21410 22339 21209 22217 21360 22043 21239 22078 21360 22076 21259 21913 21543 22125 21373 22125 21301 22048 21603 22148 21508 22064 21300 22589 21341 22125 21239 21856 21557 22215 21344 22100 21520 22144 21521 22345 11989 20410 20473 21105 20855 21683 21435 21832 21175 21816 24331 22844 21686 22063 21588 22030 21480 22017 21532 22082 21603 22059 21420 21704 21545 22071 21444 22033 21692 21907 21585 22009 21790 22117 21675 21888 21444 21747 21515 21968 21565 22000 21996 21966 21922 21885 21574 21649 21296 21760 21611 21661 21744 21764 21714 22140 21766 21867 22042 21903 21805 22101 21785 21943 21667 21664 21632 21639 21534 21559 21462 21709 21349 21607 21586 21561 21536 21641 21642 21582 21606 21777 21868 21913 22003 21955 21896 21838 21917 21895 21840 21656 22242 21681 22285 21704 21944 21499 22009 21315 21892 21489 22160 21619 22285 21725 22056 21607 22016 21587 21850 21493 21933 21728 22272 21664 22224 21766 22150 21384 21990 21389 22144 21640 22183 21579 22141 21410 22001 21731 22146 21582 22235 21607 21795 21591 22163 21687 22264 21109 21925 21477 22066 21637 22243 21572 21922 21351 22139 21613 22258 21482 21899 21536 22139 21588 22225 21323 22092 21524 22213 21548 22125 21270 22328 21425 22272 21235 22033 21477 22311 21591 22034 21333 22154 21656 22181 21369 22026 21538 22272 21382 22080 21433 22306 21472 22037 21429 22257 21267 22094 62 20653 20690 21674 21232 21719 21165 21677 21225 21881 25096 22683 21698 22277 21555 21953 21516 22097 21564 22141 21531 22102 21276 21949 21460 22197 21296 22061 21538 22065 21514 21965 21408 22161 21329 22021 22103 21739 21689 22019 21539 22147 21473 22243 21927 22112 21557 21871 21476 21845 21744 22088 21583 21954 21589 22057 21489 22165 21808 21975 21639 21989 21406 21883 21473 21919 21914 21852 21713 21785 21514 22030 21712 21526 21701 22080 21620 21715 21752 21649 21637 22125 21520 21626 21755 21865 21565 22262 21720 21621 21877 21776 21824 21806 21720 21648 21563 21975 21485 21553 21944 21781 21421 22176 21835 21505 21548 22009 21756 21617 22043 21596 21504 22197 21649 21809 21865 21870 21645 21978 21659 21296 21996 21600 22010 21360 22172 21451 21792 21655 22288 21287 22307 21643 22043 21705 22008 21632 21830 21852 21788 21568 22053 21707 21665 21763 22194 21579 22020 21636 21843 21676 22071 21330 22253 21559 21961 21521 22297 21432 22174 21943 21871 21581 22149 21376 22089 21747 22004 21559 22306 21426 22065 21483 22075 21583 22297 21253 22109 21556 22067 21575 22345 21188 22091 21704 22161 21431 22176 21382 22274 21574 20678 21180 22188 21088 22112 21371 21911 21373 22164 34827 22649 21763 22053 21543 22218 21398 22241 21617 21936 21504 22188 21431 22184 21559 21960 21547 22361 21347 22236 21537 22128 21372 22180 21161 22277 21416 21984 21432 22155 21433 21995 21473 22009 21564 21858 21401 22108 21582 21939 21688 22107 21261 21896 21348 22017 21213 22089 21623 21844 21353 22193 21177 22016 21468 21920 21280 22011 21473 21981 21790 22209 21710 21888 21402 21964 21872 22003 21548 21749 21478 21944 21431 22125 21465 22023 21371 22096 21648 21712 21580 21984 21400 21864 21712 21976 21684 21865 21776 21959 21564 21998 21627 21810 21526 21959 21621 22044 21435 21937 21556 21815 21330 21747 21623 21934 21735 21883 21333 21779 21955 22005 21714 21981 21597 21736 21328 21747 21609 22107 21993 22045 22032 21888 21839 21867 21623 21799 21795 21696 21773 21724 21504 21744 21552 21705 21456 21576 21461 21800 21641 21741 21551 22162 20992 21345 21768 21622 21681 21670 21671 21504 21707 21892 21762 21175 21946 21528 21889 21486 22001 21728 22077 21760 22195 21634 22152 21549 21798 21623 21910 21835 22235 21608 21908 21799 22178 21691 21916 21465 21961 21835 22000 21466 22035 21608 21977 21668 21794 21521 22189 21624 22135 21414 22083 21633 22043 21627 21938 21510 22256 21554 22124 21379 22117 21597 22337 21527 22060 21292 22000 21400 22336 21651 22197 21373 21989 21296 22065 21537 22308 21673 22223 21621 22085 21383 22055 21233 21991 21382 22374 21511 22245 21520 22344 21576 22393 21531 22322 21511 22160 21574 22167 21593 22337 21526 22228 21585 22221 21446 22168 21593 22188 21559 22177 21537 22220 21414 22272 21348 22159 21340 22113 21295 22042 21292 22069 21363 21984 21324 22023 21301 22007 21541 22263 21548 21760 21337 22104 21536 22047 21216 22016 21216 22016 21397 22234 21480 22149 21364 22180 21270 21947 21301 21719 21255 22005 21520 22232 21552 22042 21242 22025 21466 22073 21240 21755 21655 22031 21667 21957 21495 22027 21412 21956 21554 22016 21451 21861 21479 21864 21491 21923 21741 21781 21533 21912 21461 21905 21607 21965 21687 21799 21398 21809 21441 21973 21802 21895 21561 21616 21448 22087 21789 21909 21568 21540 21696 22059 21768 21837 21540 21721 21865 21953 21803 21716 21493 22052 21814 21853 21419 21506 21739 22706 21683 21619 21376 21878 21828 21863 21566 21590 21635 22022 21719 21651 21453 22000 21921 21802 21392 21687 21931 21785 21694 21457 21676 21682 22044 21629 21853 21578 22154 21451 21926 21523 22204 21641 21824 21648 8582 16738 19179 19593 20468 20401 20501 20294 20903 43347 28577 23800 23319 22566 23093 21884 22417 21965 22120 21462 22256 21745 22231 21498 22255 21832 507 15557 20480 20434 21011 20759 21527 20936 21319 20896 38166 24293 23196 22187 22696 21895 22122 21742 22400 21692 22029 21523 22380 21675 21989 21623 22289 2165 19764 20322 21465 21231 21642 21159 21975 21095 21783 26683 23657 21870 22457 21891 22387 21424 22184 21744 22210 21390 22256 21720 22224 21450 22165 21639 17315 20326 21684 20929 21682 21073 21813 21080 21978 21130 24064 21865 22528 21660 21597 21554 22058 21530 22064 20293 21283 21063 21808 21126 21797 21143 22006 19815 21504 21078 21676 21094 21739 21197 21892 21116 32215 21838 22087 21394 21993 21367 21704 21568 21803 21376 21873 21524 21764 21504 21889 21478 21761 21539 21984 21467 21984 21451 22016 21511 21776 21462 21804 21467 21786 21326 21917 21519 21796 21541 21877 21427 21912 21546 21845 21611 21814 21397 21725 21657 21837 21399 21913 21552 21588 21847 21837 21431 21803 21636 21661 21689 21901 21511 21606 21872 21760 21266 21970 21683 21604 21684 21837 21481 21773 21922 21720 21376 21837 21748 21558 21516 21946 21511 21520 21873 21686 21721 21769 21730 21671 21601 21657 22034 21290 21872 21546 21964 21262 22063 21665 21886 21506 22081 21594 21670 21679 21988 21365 21741 21696 21798 21313 21940 21621 21667 21490 21997 21423 21875 21511 22167 21561 21944 21667 21957 21328 21986 21559 22174 21344 22072 21511 21777 21406 22067 21591 22039 21384 22168 21497 21913 21352 22077 21587 21906 21261 22112 21501 22313 21303 22062 21536 22346 21195 22160 21541 22096 21306 22066 21382 22269 21384 21861 21372 22205 21623 22089 21202 21935 21397 22005 21504 22031 21269 22012 21546 22153 21318 21968 21371 22097 21248 22119 21213 21837 21440 22092 21293 22039 21120 21852 21627 21976 21443 21845 21278 21864 21507 22022 21244 22112 20502 21938 21344 22074 21296 21993 21251 21895 21348 22016 21379 21916 21276 21917 21551 21988 21329 21773 20769 21881 21555 22021 21457 21792 21287 21757 21559 21926 21522 21930 21378 21906 21612 21984 21511 21895 21458 21853 21468 21905 21500 21888 21574 21711 21241 21865 21523 22017 21626 21817 21431 21687 21446 21949 21635 21861 21463 21564 21466 21911 21765 21897 21607 20961 21428 21835 21955 21750 21734 21559 21761 21584 21853 21968 21688 21564 21712 21589 21677 22000 21633 21673 21494 21613 21554 22035 21832 21709 21464 21432 21488 21843 21987 21750 22017 21592 21824 21305 21904 21526 22108 21564 22029 21320 21777 21632 21927 21721 21877 21533 21778 21494 21923 21817 22072 21596 21908 21367 21831 21560 22135 21624 21968 21505 21794 21442 21989 21616 21968 21472 21738 21389 21948 21560 22167 21543 22002 21352 21891 21460 22087 21537 22171 21511 21864 21292 21917 21532 22201 21537 22126 21529 21923 21304 22099 21449 22169 21385 22049 21178 21987 21416 22156 21510 22169 21477 21837 21208 22003 21528 22089 21557 22010 21234 21975 21411 22119 21468 22134 20710 21949 21248 22060 21425 21920 21261 21884 21402 21991 21587 21989 21382 21897 139 15532 18264 20189 19917 20640 20227 20933 20389 21075 31796 25165 22839 22776 22000 22369 16992 20224 20434 20995 21003 21400 21113 21385 20982 34665 24315 23293 22176 22328 21797 17341 20050 21205 20977 21417 21159 21419 21257 21744 43339 24202 22413 22235 21942 22353 16478 20692 21019 21202 21377 21793 21310 21609 21073 21409 24001 22736 22094 21914 21979 12413 20964 21677 21424 21526 21136 21506 21808 21819 21479 23349 21967 21972 22074 21954 21753 21672 21439 21685 21853 21668 22018 21657 21879 21546 22181 21670 22125 21456 21724 21541 21969 21782 21929 21389 21704 21699 22035 21615 21958 21425 21897 21589 22146 21546 22126 21313 21994 21716 22117 21600 21760 21425 21997 21585 22100 21360 21826 21301 22139 21530 22117 21357 21879 21415 22123 21605 22030 21272 21967 21463 22178 21468 22057 21175 22000 21483 22156 21441 21860 21265 22074 21536 22156 21080 21880 21472 22091 21564 22123 21403 21938 21303 22135 21261 22057 21283 21799 21487 21986 21343 21866 20836 21907 21437 22165 21242 21905 21424 21832 21452 21973 21281 21813 21153 21873 21369 21942 21398 21885 21253 21906 21520 21956 
21894 21557 21829 21806 21848 21694 21976 21664 21963 21780 21999 21760 22027 21751 22036 21731 21907 21689 21841 21535 21786 21376 21761 21443 21657 21405 21853 21481 21836 21521 21847 21552 22007 21660 22023 21800 22007 21634 21962 21705 21971 21623 21982 21735 22001 21678 22080 21455 21844 21557 22055 21497 21890 21604 21879 21614 21863 21538 21723 21538 22103 21649 21907 21492 21909 21524 21766 21563 21860 21666 22004 21655 21945 21651 21990 21925 21731 21957 21731 21808 21788 21967 21665 21958 21739 21794 21796 21929 21616 21826 21872 21833 21888 21923 21732 21890 21828 21799 21734 21840 21783 21821 21776 21867 21570 21909 21768 21913 21751 21908 21587 21905 21824 21906 21778 21968 21603 21851 21845 21767 21752 21929 21607 21891 21752 21804 21780 21945 21647 21961 21679 21846 21815 21850 21708 21948 21687 21883 21856 21772 21754 21943 21624 21958 21671 21864 21785 21830 21700 22002 22122 22007 21766 21825 21700 21984 21644 21989 21654 21928 21780 21993 21741 21920 21568 21935 21699 21898 21813 22233 21748 21881 21694 21997 21689 21944 21724 21936 21775 21987 21568 21960 21683 21948 21804 21796 21621 21866 21754 22020 21720 21880 21629 22035 21616 22032 21700 21892 21690 21961 21846 21764 21664 21911 21719 21937 21724 21953 21567 21923 21719 22021 21627 21954 21569 21875 21610 21961 21536 21966 21591 21987 21624 21918 21658 21836 21624 21968 21691 21903 21627 21991 21738 21883 21680 21843 21760 21850 21657 21854 21701 21896 21715 21760 21731 21801 21749 21859 21778 21872 21696 21875 21736 21840 21737 21888 21665 21891 21541 21847 21601 21937 21799 21958 21650 21828 21856 21925 21561 21785 21687 21913 21699 21741 21874 21688 21973 21733 21857 21801 21760 21844 21697 22004 21779 21722 21731 21780 21830 21840 21660 21836 21648 21946 21597 21959 21651 21817 21746 21678 21865 21735 21799 21808 21579 21873 21677 21981 21684 21892 21804 21678 21778 21805 21847 21752 21760 21827 21667 21815 21712 21815 22026 21607 21884 21738 21917 21655 21917 21760 21847 21880 21818 21768 21809 21780 21798 21628 21936 21809 21862 21792 21828 21817 21728 21892 21979 21861 21744 21760 21869 21777 21983 21655 21968 21722 21924 21689 21899 21752 21813 21852 21881 21801 21871 21792 22001 21663 21911 22045 21879 21636 21900 21761 21789 21908 22032 21785 21931 21656 21933 21664 21988 21664 21986 21856 21940 21661 21952 21799 21809 21805 21905 21674 21953 21701 22034 21594 21973 21691 21949 21725 21852 21796 21905 21755 21844 21735 21964 21573 22033 21493 21916 21728 21914 21776 21761 21733 21909 21765 21940 21649 22061 21589 21953 21693 21923 21637 21871 21703 21861 21646 21864 21730 21871 21640 21970 21467 21936 21697 21959 21712 21777 21696 21960 21596 21873 21618 21932 21704 21904 21640 21970 21672 21907 21700 21656 21716 21913 21773 21850 21675 21767 21725 21953 21628 21884 21791 21901 21679 21863 21684 21993 21707 21829 21770 21902 21744 21885 21648 21869 21715 21860 21776 22080 21733 21921 21686 21799 21660 21911 21790 21835 21754 21889 21837 21946 21736 21766 21782 21989 21533 21877 21689 21812 21829 21797 21853 21959 21660 22016 21783 21849 21900 21860 21624 21875 21625 21937 21770 21751 21894 21799 21633 21944 21677 21776 21870 21800 21605 22048 21763 21651 21871 21917 21649 21716 21984 21742 21724 21719 21874 21831 21796 21581 22295 21657 21773 21795 21950 21735 21856 21753 21792 21656 21789 21719 21863 21750 21868 21862 21861 21889 21876 21876 21931 21828 21916 21835 21863 21833 21888 21847 21924 21788 21940 21734 21927 21691 21882 21677 21883 21737 21724 21753 21945 21855 22041 21797 21915 21612 21828 21703 21853 21756 21893 21725 21810 21666 21857 21705 21953 21837 21937 21742 21917 21594 21806 21703 21896 21785 22048 21774 21965 21638 21977 21607 21780 21584 22025 21648 21905 21599 21876 21724 21997 21744 21990 21720 21923 21697 21908 21743 21965 21760 21957 21696 21986 21760 21911 21686 21933 21696 21977 21638 21948 21722 21969 21620 21925 21645 21911 21723 21971 21672 21907 21592 21760 21678 21900 21590 21885 21688 21863 21657 21961 21622 21983 21731 21880 21648 21960 21703 22024 21477 21905 21637 21956 21604 21890 21697 21883 21655 21849 21561 22075 21698 22009 21908 21687 21664 21920 21697 21869 21737 21888 21717 21841 21672 21824 21671 21916 21724 21837 21655 21982 21720 21942 21693 21873 21709 21930 21545 21922 21774 21956 21654 21712 21605 21937 21833 21953 21670 21645 21784 21948 21760 21741 21649 21888 21843 21786 21685 21830 21880 21920 21699 21750 21842 22036 21741 21788 21664 21794 21911 21819 21633 21532 21707 22016 21711 21742 21575 21975 21829 21802 21578 21937 21796 21749 21729 21857 21833 21779 21528 21959 21839 21797 21595 21643 21862 21835 21945 21640 21940 21696 22028 21736 21952 21653 21648 21926 21960 21797 21785 21780 21958 21752 21809 21865 21944 21692 21801 21817 21898 21696 21914 21892 21841 21590 21867 21848 21956 21685 22004 21735 21776 21709 21952 21701 21865 21740 21912 21693 21883 21829 21882 21755 21993 21716 21792 21743 22021 21736 21874 21778 21860 21621 21985 21703 21946 21699 22001 21722 21880 21767 21904 21527 21947 21751 21830 21701 21957 21579 21974 21799 21472 21651 21973 21677 21941 21780 21875 21580 21960 21728 21888 21769 22006 21232 21879 21751 21925 21617 21975 21710 21883 21634 21933 21760 21908 21687 21938 21728 21932 21721 21971 21763 21811 21623 21867 21678 21788 21735 21853 21561 21914 21731 21869 21689 21936 21770 21896 21744 21869 21623 21879 21524 21868 21650 21824 21506 21911 21622 21767 21851 21722 21517 21744 21957 21701 21906 21883 21504 21940 21636 22011 21684 21745 21739 21821 21791 22011 21707 21911 21767 21932 21748 21892 21735 21927 21610 21965 21665 22135 21672 21959 21990 21916 21868 22021 21817 21932 21680 21897 21728 21836 21831 21940 21821 21991 21770 21861 21874 21910 21570 22004 21767 21833 21928 21820 21830 21984 21734 21682 21897 21828 21721 21946 21753 21822 21853 21825 21687 21902 21752 22012 21918 21872 21605 21972 21773 22053 21900 21813 21672 22005 21731 21820 21807 21746 21728 21780 21888 21760 21608 21828 21842 21767 21899 21696 21825 21836 21862 21650 21829 21845 22039 21846 21889 21721 21769 21868 21872 21696 21852 21859 21703 21815 21893 21739 21739 21901 21815 21669 21884 21717 21834 21671 21972 21713 21873 21844 21796 21632 21772 21883 21840 21747 21976 21741 21818 21692 22039 21722 21920 21739 21934 21671 21961 21718 21943 21568 21920 21827 21861 21558 21891 21768 21929 21606 21967 21712 21992 21750 21864 21546 21923 21687 22023 21729 21927 21976 21721 21735 21940 21701 21995 21764 22000 21777 21888 21670 21857 21708 21923 21653 22219 21873 21767 21832 21708 21736 21722 21632 21742 21557 21780 21572 21808 21616 21840 21709 21944 21647 21928 21651 21816 21650 21779 21560 21904 21550 21687 21655 21865 21690 21984 21593 21989 21361 21975 21600 21820 21665 21955 21611 21988 21677 21747 21627 21925 21646 21973 21610 21825 21544 21986 21672 21845 21723 21939 21728 21925 21318 21740 21519 21850 21607 21869 21864 21901 21671 21730 21760 21849 21716 21842 21548 21831 21762 21839 21717 21994 21677 21845 21712 21889 21725 21964 21616 21864 21690 21881 21677 21833 21809 21888 21683 21995 21639 21888 21853 21876 21755 21904 21717 21856 21705 21737 21675 21799 21627 21856 21676 21843 21642 21737 21711 21777 21751 21784 21691 21868 21705 21877 21677 21824 21688 21792 21780 21805 21632 21856 21696 21848 21740 21836 21739 21672 21629 21744 22055 21882 21719 21751 21747 21932 21920 21984 21831 21677 22013 21880 21933 21698 21786 21708 22080 21533 21811 21777 21856 21735 21881 21872 21956 21858 21796 21737 21824 21719 21687 21696 21843 21723 21892 21825 21864 21696 21898 21699 21760 21753 21892 21760 22011 21846 21816 21573 21745 21732 21873 21737 21972 21832 21811 21799 21765 21708 21896 21784 21959 21667 22288 21612 21905 21798 21923 21831 21843 22112 21760 21723 21955 21847 21911 21718 21779 21771 21917 21779 21872 21848 21872 21734 21995 21723 21888 21485 21935 21729 22057 21681 22051 21731 21943 21785 21998 21662 21773 21688 21957 19633 21414 21152 21632 21533 21992 21465 21888 21545 21954 21490 21797 21542 21925 21549 21923 21688 21877 21665 21829 21611 21849 21654 21815 21646 21777 21655 21894 21593 21927 21501 22024 21436 21980 21421 22092 21489 13522 16721 18944 19301 20153 19745 20466 20260 20567 31313 23140 21960 21968 21628 21897 21687 21960 21591 21782 21816 21929 21591 21924 21768 21908 21582 5358 18926 20820 20867 21299 21058 21368 21154 21511 21159 25700 21975 22022 21657 21824 21409 22037 21712 21811 21602 22056 21655 21849 21463 21896 21803 21712 16540 21190 21265 21473 21253 21760 21395 22057 21447 21798 22944 21801 21901 21881 21595 21673 21879 21851 21473 21693 21909 21832 21516 21793 21927 21821 21600 20360 21369 21562 21338 22035 21568 21636 21580 22012 43224 22155 22103 21853 21571 21846 21924 21888 21780 21692 21465 21489 21616 21804 21879 21453 21846 21756 21293 21465 21880 21522 21573 21592 21808 21327 21717 23704 21975 21488 21965 21816 21699 21755 21923 21684 21757 21690 21895 21420 22033 21760 21863 21696 21896 21673 21899 21736 21821 21550 21938 21665 21782 21642 21891 21424 21918 21795 21857 21571 22006 21719 21902 21694 21909 21481 21941 21592 21709 21707 22048 21512 21943 21756 21963 21544 22039 21536 21874 21609 21924 21487 21987 21766 21784 21627 22049 20850 21865 21657 21949 21528 21895 21684 21713 21748 22052 21562 21837 21530 22040 21448 22061 21482 22004 21591 21944 21473 22018 21591 21869 21463 22033 21673 21707 21769 21877 21465 21812 21645 21981 21435 21952 21474 21988 21405 22092 21459 21906 21640 21815 21540 21879 21625 21952 21490 21901 21703 21792 21426 22005 21671 21709 21569 21917 21669 21838 21723 21831 21783 21921 21657 21830 21454 21904 21606 21848 21554 21977 21673 21821 21473 21824 21655 21789 21051 21760 21670 21837 21523 21832 21767 21793 21549 21658 21948 21804 21542 21649 21748 22007 21671 21669 21478 22035 21825 21720 21480 21696 21781 22035 21813 21751 21964 21653 21813 21815 21627 21694 21511 21893 21938 21845 21494 21847 21538 21917 21858 21834 21601 21527 21565 21922 21825 21921 21928 21547 21708 21738 21977 21717 21833 21664 21655 21681 21858 21813 21825 21592 21771 21792 21880 21751 21779 21604 21721 21703 21831 21824 21937 21884 21680 21666 21952 21784 21831 21414 21860 21740 21829 21815 21969 21482 21730 21722 21955 21729 22055 21634 21664 21561 21999 21664 22057 21740 21770 21413 21864 21750 21959 21705 21942 21744 21736 21563 22005 21713 22039 21514 21805 21443 22033 21624 22068 21592 21744 21467 21876 21686 21991 21623 21911 21451 21795 21676 22018 21783 21991 21522 21871 21692 22006 21716 22003 21511 21720 21609 22027 21485 21914 21555 21907 21670 22087 21656 21990 21603 21831 21560 21927 21550 21833 21613 21879 21682 21913 21560 21944 21558 21847 21397 21748 21704 22062 21575 21941 21537 21792 21392 21915 21763 21905 21601 21800 21564 21776 21593 21913 21669 21844 21639 21831 21410 21897 21712 21866 21562 21837 21570 21690 21592 22019 21728 21796 21577 21801 21454 21869 21687 21996 21672 21761 21585 21581 21553 21873 21953 21831 21665 21709 21826 21682 21845 22007 21770 21781 21518 21685 21595 21888 21856 21935 21610 21666 21657 21672 21828 22016 21722 21696 21571 21837 21570 21981 21974 21871 21549 21664 21469 21837 21964 21835 21937 21761 21801 21496 10923 16598 18824 19508 20064 20015 20316 20625 20708 20672 24642 22276 21882 21642 21962 7776 20041 20711 21027 21137 21524 21319 21609 21065 21447 25268 22516 22029 21992 20958 21783 19992 21434 21440 21785 21424 21552 21536 21835 21583 27434 22221 21959 21753 22017 21867 20208 21121 21577 21399 21858 21553 21757 21237 21668 21504 22625 21848 22044 21703 21856 19492 21774 21608 21866 21452 21768 21589 22039 21591 21888 21915 22118 21714 22016 21574 21894 21445 21911 21705 21928 21582 21843 21561 21984 21677 21872 21588 21944 21645 21969 21526 21928 21428 21828 21575 21907 21574 21944 21367 21809 21713 21895 21677 21776 21579 21896 21756 21816 21513 21735 21576 21900 21696 21905 21655 22040 21570 21945 21632 21777 21573 21718 21520 21939 21690 21749 21642 21581 21760 21911 21625 21707 21429 21622 21877 21829 21629 21661 21427 21901 21895 21825 21576 21859 21633 22078 21801 21837 21562 21623 21531 21863 21847 21792 21561 21966 21588 21937 22008 21769 21956 21737 21749 21688 21927 21796 21903 21378 21742 21753 21860 21833 21770 21591 21681 21728 21877 21878 21825 21440 21792 21792 21970 21570 
37088 33522 36445 36387 36709 35232 38105 34597 38096 35944 38708 35624 38697 36038 38663 35668 37368 35116 36564 33376 35958 41362 35879 42289 34920 41948 37243 42856 36952 32931 36725 33254 38576 34773 38602 36227 38713 34321 37961 35310 38118 34529 38328 35801 38448 35088 39004 42807 36952 33536 38964 43125 37390 34055 37192 34359 36991 33145 35408 33060 39463 34569 37289 42877 37728 33032 35594 33626 36720 34656 38432 34816 37830 34594 38316 35494 38172 35713 38283 34872 38294 34848 36864 33910 36544 35084 36432 34299 37100 34128 37532 33857 35428 33213 36776 33651 37248 35828 34106 33025 34844 42146 34859 42663 35352 33301 33671 33103 35911 42352 34218 33691 36333 37260 35856 37927 34150 36839 36782 35920 35725 37664 34288 37092 35785 36248 35856 37870 34752 37987 35174 36712 36512 36823 35287 37888 35185 37292 36749 35892 35841 37931 34328 37897 34964 36842 36050 36538 35073 38401 39792 38880 35877 36405 35061 38087 34529 38312 34661 37498 35904 38428 35894 37360 33449 37810 35200 37226 36423 40919 35893 37239 35241 38560 35162 37729 35544 37542 36137 38356 33495 37804 35024 37880 36330 36087 34304 36915 35882 38416 35404 37085 34565 38656 34156 38373 35152 37047 35093 38001 36797 35682 34492 37449 35563 37664 35551 37819 33884 37488 35552 38512 34593 37755 33593 37008 34193 37956 33084 38053 34077 38259 34361 37538 34684 36569 34280 37852 35232 37488 34540 38432 35744 37309 34781 36647 35527 36777 34640 36899 35198 37104 35387 35472 35520 36188 35803 36908 35843 36896 34944 37065 35564 36483 35659 36930 34662 37101 33332 36743 33968 37576 36346 37993 34504 36360 36719 37627 33624 35907 35091 37421 35194 35736 37000 34985 38148 35670 36797 36248 35497 36610 35043 38439 36048 35433 35515 35809 36552 36507 34690 36571 34340 37797 34171 38009 34622 36362 35655 34961 36968 35725 36272 36119 33835 36917 35019 38350 34985 37045 36306 34992 35767 36359 36882 35767 35480 36468 34766 36428 35129 36448 38622 34315 37184 35664 37608 34732 37574 35575 36844 37138 36484 35711 36215 35857 36161 34407 37495 36305 36965 35938 36435 36448 35338 37062 38368 37057 35584 35473 37137 35859 38500 34793 37889 35510 37484 35111 37331 35796 36369 36864 37259 36270 37280 35960 38449 35008 37483 38933 37404 34282 37229 35652 36162 37301 38531 36132 37781 34585 37760 34576 38212 34598 38169 36760 37740 34848 37691 36352 36241 36374 37287 34883 37792 35242 38556 34042 38096 35244 37996 35681 36832 36083 37285 36012 36644 35719 38065 33753 38489 43081 37824 35411 37442 35761 35607 35561 37392 35815 37696 34500 39080 34035 37750 35274 37550 34405 37207 35320 36945 34585 36828 35460 37248 34344 37952 42839 37863 35112 38051 35208 35779 34884 37876 34064 36937 34188 37616 35176 37109 34336 37952 34800 37305 35106 34451 35185 37432 36007 36801 34977 35808 35572 37804 34496 37180 36338 37420 35162 37024 34920 38392 35445 36514 35824 37389 35599 37348 34357 37081 35378 36812 35745 39005 35719 37454 35072 36232 34669 37451 36236 36710 35885 37048 36777 37915 35613 35748 35958 38384 33385 37041 35094 36208 36554 36183 36969 38129 34761 38220 36176 36811 37344 36904 34299 37048 34419 37596 35872 35896 37219 36320 34216 37688 35072 35661 37146 36139 34098 38592 35828 34536 37207 37668 34487 35188 38096 35864 35467 35458 36989 36696 36088 33866 41399 34865 35920 36112 38029 35784 36696 35872 35904 34487 36096 35479 37052 35840 37040 36994 37002 37102 37104 37089 37827 36511 37530 36769 37104 36648 36976 36898 37543 36117 37719 35650 37707 35232 37185 35027 37286 35684 35466 35817 37859 37155 38858 36289 37596 34256 36374 35287 36928 35932 37211 35635 36205 34608 36749 35240 37811 36822 37712 35864 37616 34001 36302 35273 37128 36066 38693 36084 38199 34441 38176 34300 35776 33591 38465 34405 37197 34260 36997 35510 38566 35648 38374 35424 37545 35093 37264 35954 38187 35588 37962 34986 38193 35587 37511 35051 37777 34977 38204 34442 37849 35512 38027 34289 37538 34624 37461 35601 38134 34819 37320 33891 35397 34936 37239 33926 37262 34984 37022 34665 37977 34401 38432 35643 37088 34352 37845 35365 38416 42860 37575 34422 37802 34059 36960 35053 37296 34736 36753 33584 39204 35158 38606 37416 35168 34456 37282 35064 37111 35687 36938 35419 36573 34736 36213 34892 37456 35536 36722 34708 38312 35421 37786 35274 36980 35416 37629 33393 37336 36019 37869 34656 35072 34034 37581 36672 37872 34857 34502 35840 37904 35577 35767 34412 36864 36763 36038 34999 36480 37137 37408 35188 35740 36570 38647 35923 36045 34512 35936 37526 36612 34215 33090 35191 38232 35589 35755 33756 38185 36651 36260 33737 37558 36124 35797 35421 36773 36640 35943 33004 37952 36948 36205 34073 34416 36876 36740 37928 34372 37641 34939 38576 35636 37713 34638 34251 37527 37996 36248 36037 35847 37981 35826 36225 37019 37816 35153 36181 36432 37277 34969 37425 37143 36662 33895 37024 36739 37869 35079 38438 35805 35714 35350 37698 35237 36977 35714 37354 35242 37297 36592 37248 36011 38439 35381 35876 35891 38533 35632 37002 35843 36835 34346 38169 35371 37844 35205 38408 35538 37088 35905 37145 33202 37857 35988 36546 35178 37952 33924 38093 36368 42547 34835 38144 35074 37783 35921 37127 33808 37828 35389 36935 35844 38581 40273 37467 35970 37612 34230 38219 35431 37312 34246 37740 35534 37272 35159 37624 35401 37678 35501 38137 35801 36327 34433 37039 35030 36008 35691 36929 33585 37352 35584 37159 35104 37522 35853 37144 35589 37132 34471 37201 32982 36903 34445 36215 32640 37370 34364 35785 36906 35458 32989 35393 37960 35260 37237 37380 32629 37553 34304 38656 34997 35593 35744 36564 36310 38752 35460 37496 35934 37697 35756 37081 35749 37713 34215 38112 34717 39936 34907 38044 38457 37621 37120 38571 36564 37724 34807 37209 35383 36603 36690 37735 36633 38520 35917 36960 37058 37450 33584 38371 35980 36608 37601 36536 36554 38155 35685 34820 37216 36472 35456 37843 35936 36569 36984 36434 35126 37351 35800 38641 37748 36979 34162 37993 36048 38912 37429 36434 34759 38528 35658 36453 36507 35648 35303 35809 36945 35525 34007 36335 36611 35888 37376 34951 36356 36640 36975 34443 36481 36761 38870 36871 37097 35478 35793 37029 36952 34944 36800 36954 35337 36457 37229 35814 35736 37397 36552 34794 37211 35431 36560 34902 38021 35312 36992 36680 36076 34088 35756 37314 36550 35778 38133 35885 36424 35100 38820 35545 37352 35803 37808 34965 38002 35456 37896 33506 37232 36553 36983 33528 37056 35731 37657 34189 38223 35207 38298 35895 36897 33348 37453 35161 38616 35548 37708 38128 35541 35680 37692 35236 38512 35744 38320 35918 36948 34805 36748 35280 37543 34645 40754 37197 35948 36461 35304 35465 35421 34032 35713 33460 35738 33514 36005 34040 36402 35380 37729 34737 37497 34589 36265 34408 35842 33416 37032 33524 35000 34625 36930 35072 38067 34063 38279 41604 38547 33946 36375 34641 37888 34349 38199 35092 35723 34464 37545 34620 38121 34235 36311 33207 38104 34807 36701 35561 37762 35401 37577 41152 35910 33132 36672 34217 37069 36949 37456 34956 35379 35461 36785 35297 36561 33380 36535 35617 36835 35425 38395 35093 36705 35145 37020 35632 38054 34133 36807 35083 37175 35041 36553 36256 36947 34997 38481 34576 36884 36993 37091 36025 37146 35433 36666 35244 35590 34915 36209 34502 36583 34896 36661 34433 35568 35458 35784 35914 35888 35153 37008 35257 37129 35036 36245 34944 35847 35847 36344 34096 36608 34931 36647 35712 36620 35793 34690 34464 35456 38990 37332 35552 35875 35749 37689 37433 38193 36761 35011 38744 37225 37877 35094 35972 35246 39002 33417 36227 35811 36702 35714 37216 36955 37917 36882 36085 35641 36272 35513 35088 34842 36667 35565 37081 36444 36923 34940 37216 35145 35459 35819 37083 35536 38736 36873 36363 33688 35545 35436 36995 35675 38064 36576 36369 36283 35768 35238 37120 35952 38111 34832 41035 34419 37208 36212 37591 36726 36744 39398 35645 35520 37926 36953 37572 35438 35904 35904 37613 35991 36917 36712 36944 35616 38532 35662 36939 42992 38240 35542 38981 34976 38832 35665 37923 36103 38593 34898 35914 34922 37932 33617 41862 39423 34247 33153 38200 42696 37224 33376 37718 42841 36468 33272 37495 33536 37457 34989 37123 34670 36480 34277 36736 34591 36424 34560 35765 34658 37136 33988 37632 43201 38809 42445 38565 42347 39697 42793 30610 32477 35840 40093 39531 34899 42356 40514 33197 45389 40656 38144 38025 34508 37188 35175 37889 34076 35865 36324 37681 34070 37408 35761 37288 33922 24901 35809 35630 36144 40803 38413 41662 39507 33099 39376 36785 38341 38640 34753 36231 41863 39008 35264 36294 33948 38786 34816 36744 42699 37440 36410 35124 30694 39488 40482 42802 40592 35702 41728 39176 42626 36457 38023 36336 37432 37280 34114 34726 37223 36976 42618 35496 37405 36545 32928 35869 37724 36656 33860 41082 41912 33833 41168 38922 33543 34097 33653 38573 40523 40332 39840 37132 33672 36633 37533 37019 35928 35060 42548 43109 34392 36176 37296 42602 37046 35938 40860 42839 37426 32947 33504 33684 36009 41349 35624 36085 38304 42757 38496 36438 35149 35911 37572 34939 35959 35032 37277 42152 38896 35640 37032 34944 37099 34880 37328 35575 36573 33477 37560 34688 35899 34384 37097 41975 37888 36216 36812 33648 38480 35565 37393 35261 37380 42841 38125 33922 35275 35286 38660 32888 37792 35968 38125 33303 38732 33113 36886 34184 37415 43108 38667 35900 35890 34466 38724 36281 37036 34664 37968 33070 37184 34919 35172 35616 38805 33670 36649 33120 38548 42408 39445 42951 38768 34129 37687 42648 38683 34128 37069 42701 38901 34968 35275 35776 37154 42644 36562 34588 38323 42496 38011 42682 38564 42144 39687 42688 37540 34358 36416 33149 37141 34422 37653 42868 37719 35361 35875 42032 38861 35025 35341 33472 37504 34836 36688 35576 36629 36096 37460 34696 36473 42567 37444 34164 36608 33357 38120 34933 36539 42615 36570 34715 36109 38441 35596 34754 36688 33024 36344 35887 36008 33460 34485 37849 36328 33262 34271 35601 38672 35008 34707 42651 38999 36548 35337 42616 35208 35936 38697 36509 35925 37993 34645 36320 36490 34512 35113 32878 37052 37723 36824 42952 37136 33160 37488 36873 36631 33977 33049 33538 37346 36465 37490 37633 33500 35137 35584 38229 35473 36583 34520 34604 34762 36748 36405 36422 33829 35821 35888 37108 35941 35923 33979 35347 35234 36625 36308 37696 37303 34794 34549 37660 35972 36662 42040 37120 35724 36539 36508 38073 42897 35750 35415 37928 35519 39051 34324 34440 33445 38577 34617 38940 35811 35792 41973 37161 35844 38093 35310 37792 35592 35509 33616 38485 35335 38858 32985 36224 42293 38885 34400 38967 33955 35456 42634 37345 35052 38450 34534 37460 42593 36423 34885 38339 36177 38505 33012 37141 35132 38552 35380 38533 33049 35186 34096 38621 43056 37782 33527 37254 34830 39383 34663 38320 34148 36573 33447 37604 33543 36489 34323 37196 34855 37408 33489 37648 33544 36731 41843 35953 35116 39106 33924 37733 33176 35776 41528 37824 35808 37260 33999 36003 33578 35588 33910 37376 34839 36582 34496 36580 41875 37517 35188 36965 33580 36653 33516 34930 33766 38391 35442 36024 33705 36108 42530 37444 35178 38439 34832 35546 33700 33771 33209 36886 37888 36741 34663 35301 36325 34836 36713 38726 35936 35959 33016 34837 33981 36845 36736 37961 34242 34519 34550 34631 36367 38290 35543 34882 33562 36608 33527 38275 38293 37376 33536 34384 42656 37037 38133 36817 37714 35688 36204 42842 33472 31344 34648 31965 37967 38044 41077 33659 34381 33968 34880 41024 37445 34459 37969 30424 37814 34787 37880 39127 33082 40970 34389 38342 42581 42456 44131 39116 38464 37647 36010 37526 42327 42393 36324 41920 33506 32849 36561 34000 44884 41304 38340 35957 38397 37232 39819 39021 33869 41798 37058 33376 35886 40339 34859 32488 34359 36618 38871 35387 36677 31846 35754 34006 36912 42466 35993 33872 38760 34113 36866 37632 39788 35389 38256 33760 37099 42408 37812 35303 37532 33940 36616 33565 38016 35079 36864 33798 37635 34635 37980 33136 37425 42148 36709 33804 37285 33714 37659 41808 36490 35253 37280 35045 35653 33789 37043 35927 36321 32880 35536 33559 37184 34960 37216 34733 38584 33629 37765 34166 35733 33638 35267 32724 37627 35123 35751 34381 33781 35393 37490 34444 35245 42178 34592 37112 36595 34554 34696 42087 37668 37405 36459 33616 36776 34229 39268 36369 36765 33579 34289 33114 36925 36912 35944 33530 37992 33863 37571 38610 35927 37883 35707 35792 34912 37681 36119 37530 41545 36044 35848 36839 36634 35840 33961 34741 35253 37129 37235 36453 42097 36184 35920 38036 33590 
21450 21737 21395 21748 21365 21697 21271 21538 21287 20892 21380 21717 21048 21449 21173 21442 21160 21577 21127 21568 21251 21686 21313 21687 21288 21681 21303 21773 21291 21858 21174 21777 21338 21728 21349 21767 21228 21665 21319 21632 21169 21588 21140 21497 21117 21617 20720 21588 20983 21537 20928 21417 21059 21501 21136 21544 21291 21531 21189 21607 21292 21595 21094 21729 21256 21578 21056 21602 21138 21513 21236 21441 21149 21477 21138 21494 21200 21506 21240 21424 21128 21457 21098 21431 21178 21360 21048 21366 21026 21408 21252 21356 21142 21513 21225 21568 21234 21547 21288 21598 21408 21479 21319 21672 21383 21492 21453 21589 21481 21656 21440 21343 21187 21403 21055 21212 21273 21579 21609 21556 21129 21252 21179 21611 21408 21201 21133 21366 21467 21224 21165 21538 21177 21205 21463 21147 21234 21408 21529 21282 21547 21277 21548 21213 21635 21130 21589 21042 21568 21609 22203 21826 22084 21787 22180 21687 22335 21571 22256 21815 22004 21830 22169 21719 22228 21668 22170 21909 21967 21917 22199 21752 22171 21858 22149 21912 21896 21829 22279 21655 22230 21703 22189 57 4070 7967 10568 11267 12964 13069 14495 14279 15255 37681 28424 25928 25308 24492 24440 23573 23995 23367 23468 23136 23382 23049 23191 22681 23197 22631 23174 22513 22787 22440 22861 22548 22884 22254 22853 22201 22797 22247 22550 22567 22663 22272 22625 22157 22577 22556 22631 22544 22460 22244 22400 22153 22584 22006 22417 21968 22578 22109 22300 22249 22364 22137 22395 21917 22454 22080 22351 22163 22182 22095 22325 22024 22349 21888 22370 21911 22351 22109 22210 22025 22169 22108 22273 21976 22264 21797 22360 21991 22073 22042 22056 22255 22164 22193 22184 21862 22252 21354 22534 21937 22151 22133 21847 22187 21941 22083 22031 21836 22291 21856 22341 21869 22245 21863 22020 22061 22327 22229 22019 21914 22118 21908 22316 21842 22137 21990 21932 22055 22197 22209 21921 22151 21998 21712 22144 21558 22337 21870 22061 22308 21666 22360 21852 22178 21905 22116 22093 22384 22023 22166 21911 22122 21833 22261 21932 22250 21990 22054 21943 21904 21994 22113 22076 22057 21953 22166 21861 22299 21821 22282 21969 22164 21909 22116 21961 22016 22033 21991 22022 22204 21925 22295 21800 22277 21781 22301 21812 22104 21939 22120 21889 6428 11994 14708 15538 16450 16473 17347 16956 17833 17388 28353 25190 24755 23930 23832 23419 23696 23052 23366 22875 23308 22535 23189 22565 23129 22615 22798 22502 22677 22489 22774 22361 22736 22234 22762 22298 22705 22146 22638 22349 22412 22195 22417 22240 22592 22029 22666 21981 22567 21853 22651 22028 22410 22033 22314 22030 22351 22108 22428 21891 22470 21970 22345 22003 22412 21911 22316 21878 22391 21990 22272 22016 22316 21848 22377 21832 22338 22060 22160 21951 22221 21874 22344 21862 22286 21787 22119 21836 22160 21933 22198 21808 22316 21708 22293 21911 22340 21816 22239 21876 22206 21949 22195 21864 22156 22057 22255 21896 22132 21984 22103 21927 22245 21927 22217 21993 22216 21943 22231 21805 22297 21981 21997 22228 22053 21803 22199 21974 22097 21863 21767 22241 21973 21799 22272 21936 21981 22202 22009 22106 22126 21925 22286 21891 21850 22149 22063 21980 22108 21834 22077 22069 21953 21994 22160 21912 21943 22254 21973 21939 22149 21983 21936 21965 22180 22225 22029 21902 21863 22016 22455 22132 21964 22235 21849 21928 21878 22247 21909 22387 22023 22289 22085 22190 21943 22135 22040 22052 22016 22165 21997 52 15168 16905 17361 18135 18228 18805 18669 19124 18972 28438 24557 24120 23466 23511 23035 23292 22866 22829 22369 22814 22449 22740 22465 22637 22198 22517 22131 22609 22224 22727 22188 22576 22068 22320 21863 22515 22203 22536 22057 22503 22020 22318 21827 22289 21957 22417 22051 22517 22017 22489 22043 22470 21900 22374 21857 22264 21751 22156 21900 22301 22017 22297 21914 22390 22024 22395 22013 22377 21970 22400 22011 22376 22008 22390 21974 22406 21844 22326 21729 22269 21806 22233 21859 22228 21754 22568 21880 22148 21786 22201 21952 22066 21803 22363 21945 22321 21847 22168 21833 22361 21633 22140 21608 22107 21654 22311 21899 22201 21840 22178 21700 21945 22175 22105 22022 22232 21937 22249 21911 22305 21690 22357 21656 22164 21991 22228 21824 22145 21921 21873 21845 22197 21961 22126 21847 21632 21793 22158 21957 22092 21828 22124 21873 22161 21942 22135 21793 22060 21820 22103 22122 22077 21961 21868 21779 22272 22055 22091 21831 21812 21901 22247 22107 21868 21676 22114 22118 22052 21831 21853 21955 22282 21980 21976 21881 22215 22150 22025 21782 21965 22260 21998 21792 21856 22069 22131 22008 21559 21866 22226 21989 17175 18631 19577 19441 19675 19560 20155 19951 20039 43621 24005 23303 22703 22862 22570 22776 22348 22492 22161 22553 22056 22324 22331 22464 22137 22361 22188 22464 22291 22123 22206 22551 21820 22168 22243 22265 21772 22372 22184 22173 21917 22350 22057 22154 21970 22412 22016 22124 22034 22329 21755 22247 21992 22281 21879 22343 21879 22065 22049 22312 22231 22197 22017 22379 21748 22296 22048 22357 21780 22257 21876 22148 21937 22295 21629 22311 22005 22208 21745 22324 21824 22199 21926 22285 21649 22353 21900 22060 21888 22351 21637 22228 21927 22209 21820 22277 21833 22135 21960 22261 21661 22317 21996 22280 21808 22384 21815 22181 21703 22232 21667 22315 21772 22176 21914 22176 21541 22266 21712 22183 21891 22313 21996 22123 21762 22031 21680 22189 21712 22215 21754 22127 21588 22245 21771 22092 22010 22205 21915 22212 21802 22178 21960 22189 21769 22112 21884 22121 21683 22201 21730 22103 21668 22135 21548 22099 21703 21996 21810 21828 21655 22187 21800 22056 21993 22119 21787 22275 21788 21929 21932 22100 21792 22151 21804 21952 21947 22131 21570 22194 21863 21975 21929 22080 21866 22272 21967 21856 22103 21978 21751 16918 20187 20470 20785 20992 20597 21111 20828 21112 21123 23361 22469 22549 22091 22168 22394 22022 22184 22249 21905 22071 22156 22114 21852 22291 21857 22017 22185 21975 21783 22311 21829 21986 22062 21989 21778 22275 21933 21760 22231 22092 21757 22265 22042 21383 22184 21800 22301 21713 22392 21956 22071 22003 22121 21824 22129 21873 21936 22000 22103 21772 22032 22041 22149 21920 22277 21967 21909 21912 22153 21780 22174 21937 22066 21816 22120 21927 22016 21949 22130 21600 22215 21912 22333 21732 22244 21880 21980 21889 22144 21596 22072 21918 22100 21632 22199 22012 22173 21736 22193 21880 22087 21678 22246 21856 21988 21683 22216 21900 22085 21677 22184 21860 22191 21521 22049 21796 22212 21898 22186 21607 22035 21677 22247 21813 22315 21850 22213 21725 21905 21600 21980 21612 22027 21687 22043 21802 22151 21836 22156 21847 22214 21836 22232 21799 22252 21824 22219 21797 22248 21769 22249 21703 22168 21761 22168 21693 22208 21744 22253 21796 22177 21936 22188 21701 22192 21817 22108 21949 22245 21690 22133 21863 22149 21667 22053 21624 22039 21626 22146 21697 21988 21692 22010 21735 22070 21623 22340 21857 22117 21739 22065 21623 22087 21751 22006 21568 22136 22002 21753 21760 22101 21720 22070 21716 22009 21761 21982 21618 22078 21728 21890 21698 22139 21943 22218 21719 22031 21717 21921 21877 22145 21702 21937 21906 21904 21814 22087 21815 22192 21804 21873 21649 21704 21731 21746 22025 21953 22005 22022 22025 22192 22079 21997 21977 22016 21692 21937 21827 21892 21739 21856 21575 21823 21760 21851 21648 22026 21785 21825 21789 21728 21629 21681 21636 21700 21569 21804 21589 21760 21792 21921 22032 22130 22066 22153 21965 21951 21933 21913 21888 21809 21815 22005 21728 21750 21833 21484 22035 21723 22139 21744 22185 21872 22050 21865 21888 21632 21835 21618 21855 21692 22068 21783 21989 21879 21975 21810 22071 21592 21920 21822 22009 21793 22118 21778 21977 21911 21883 21623 22135 21849 22030 21816 21977 21478 21811 21703 22128 21842 22108 21828 22029 21447 22004 21766 22063 21882 22064 21632 21913 21659 22103 21806 22103 21786 22133 21573 22092 21769 22201 21660 22018 21570 22184 21689 22186 21608 21911 21607 22192 21768 22087 21448 22020 21725 22205 21755 22012 21557 22071 21769 22109 21699 21998 21820 22252 21871 22040 21621 22086 21744 22267 21670 21980 21724 22080 21677 21904 21686 22144 21672 22016 21609 22097 21751 22095 21830 22021 21813 21996 21670 21944 21810 22112 21592 22029 21679 22110 21692 39 8203 11453 12379 13879 14184 15006 14915 15385 15292 31671 26732 25643 24593 24590 23808 23820 23409 23596 23148 23320 22832 23240 22816 22953 22576 22940 8891 14130 15759 16780 16848 17134 17527 17896 17739 18098 28123 25859 24684 24229 23805 23917 23481 23592 23125 23360 22972 22939 22913 23003 22800 22608 22797 15267 17312 18220 18680 19008 18936 19216 19499 19585 33712 25548 24566 23804 23495 23583 23321 23056 22856 23223 22887 22774 22539 23040 22577 22583 22451 22904 18423 19511 19971 20156 19985 20289 20563 20534 20395 26697 24030 23367 22995 23259 22848 22721 22615 22576 20903 20664 21373 21290 21376 21175 21529 21248 16924 19546 20173 20010 20340 20266 20428 20291 20612 20430 22906 21941 21989 21584 21632 21625 21751 21336 21632 21434 21752 21287 21772 21287 21501 21461 21555 21167 21682 21356 21319 21341 21639 21152 21587 21267 21544 21208 21635 21260 21432 21312 21584 21025 21666 21276 21323 21271 21653 21036 21539 21333 21525 21097 21633 21166 21362 21225 21649 20943 21653 21228 21382 21184 21650 21148 21445 21237 21560 21045 21632 21252 21313 21236 21634 21154 21495 21285 21499 21086 21646 21239 21664 21148 21597 21031 21571 21081 21508 21063 21687 21098 21624 21201 21529 21123 21303 21359 21441 21011 21563 21016 21525 20999 21568 21028 21577 21149 21539 20974 21477 21152 21403 21334 21535 21128 21496 21140 21521 21204 21353 21277 21532 21142 21367 21255 21515 21027 21527 21205 21420 21193 21559 21191 21349 21184 21504 21201 20741 21191 21463 21172 20776 21160 21453 21189 21376 21117 21534 21233 21381 21137 21549 21289 21329 21068 21546 21316 21342 21081 21512 21257 21380 21242 21244 21472 21533 21210 21341 21152 21492 21495 21278 21135 21325 21272 21662 21287 21213 21249 21336 21434 21415 21184 21231 21096 21464 21591 21423 21164 21251 21205 21521 21505 21256 21209 21235 21159 21228 21504 21300 21470 21157 21264 21161 21522 21328 21512 21191 21303 21295 21506 21317 21383 21174 21255 21284 21482 21298 21447 21232 21346 21188 21517 21294 21563 21131 21268 21174 21588 21285 21518 21213 21238 21153 21617 21294 21461 21189 21483 21069 21514 21291 21591 21297 21505 21127 21409 21237 21614 21229 21536 21138 21339 21104 21604 21291 21641 21156 21366 21032 21613 21290 21712 21177 21704 20947 21530 21229 21656 21267 21540 21101 21492 21177 21607 21305 21570 21145 21367 21153 21675 21255 21684 21176 21504 21110 21671 21177 21588 21080 21577 21071 21570 21216 21492 21061 21460 21092 21504 21355 21562 21209 21506 21104 21432 21116 21642 21176 21545 21046 21554 21143 21549 21101 21485 21109 21471 21027 21501 21286 21476 21224 21504 21137 21465 21179 21549 21319 21505 21112 21448 21070 21453 21335 21495 21197 21506 21128 21423 21176 21601 21297 21463 21208 21414 21079 21532 21368 21516 21312 21326 21202 21497 21134 21491 21448 21423 21229 21374 21440 21259 21335 21600 21319 21391 21216 21275 21307 21417 21480 21596 21216 21294 21195 21303 21386 21716 21399 21295 21176 21208 21067 21511 21625 21412 21243 21265 21094 21351 21552 21553 21288 21314 21544 21173 21324 21280 21620 7571 11350 12812 13878 14450 15121 15271 15667 15480 36604 27292 25749 24695 24233 23660 12062 15723 16946 17313 17852 17814 18151 18041 18562 18344 27513 25217 24628 23899 23921 12037 18035 18499 19046 19009 19631 19370 19821 19456 19654 26504 24905 23867 23831 23063 23236 18890 20116 20077 20646 20158 20500 20241 20793 20403 26752 23242 23319 22803 23104 22639 20616 20768 21095 21011 21478 21169 21474 21277 21365 21143 23261 22437 22596 22279 22461 22165 22420 22043 22222 21943 22177 22016 22180 21831 22114 21703 22203 21760 22087 21592 22278 21560 22048 21600 21975 21469 21852 21639 21908 21500 21837 21413 21731 21488 21860 21488 21776 21288 21608 21569 21914 21476 21641 21525 21620 21507 21711 21386 21614 21287 21686 21432 21641 21368 21847 21314 21653 21426 21610 21328 21297 21431 21660 21464 21465 21303 21354 21577 21676 21328 21390 21252 21456 21672 21509 21377 21467 21232 21431 21579 21558 21351 21313 21166 21489 21684 21554 21318 21309 21356 21215 21556 21464 21668 21262 21389 21244 21637 21396 21641 21492 21380 21376 21591 21429 21581 21243 21433 21349 21559 21436 21596 21068 21552 
21085 21572 20950 21372 20975 21446 21027 21527 21069 21399 21133 21600 21157 21696 21161 21639 21131 21569 21144 21587 21173 21536 21220 21607 21218 21379 21027 21315 21029 21408 21067 21237 20855 21358 20901 21388 21123 21251 21097 21333 21095 21294 20901 21255 21029 21242 21047 21320 21085 21572 21198 21614 21312 21563 21505 21735 21163 21258 21376 21301 21607 21289 21594 21328 21707 21379 21543 21303 21378 21257 21371 21226 21508 21207 21333 21143 21408 21327 21365 20960 21367 20782 21264 20873 21272 21021 21411 21071 21484 21095 21536 21191 21559 21079 21568 21193 21722 21258 21747 21269 21718 21205 21704 21203 21694 21126 21774 21212 21765 21173 21722 21198 21644 20845 21433 21011 21524 21195 21683 21203 21465 20844 21629 21099 21696 20857 21312 21144 21780 20949 21639 20935 21786 20977 21610 20992 21536 21154 21612 21176 21314 21028 21588 21028 21528 20971 21517 20803 21675 21016 21774 20909 21608 20993 21572 21167 21576 21126 21774 21037 21365 21190 21411 21063 21554 20934 21683 20973 21480 20962 21527 21132 21454 20953 21558 21269 21506 21001 21569 21087 21457 21159 21269 21349 21325 21255 91 82 0 81 76 85 1420 43456 43702 37148 32352 29404 27577 26268 25720 24577 24311 23885 23185 23685 22749 23225 22784 22742 22587 22821 22384 22432 22309 22329 22298 22460 22181 22183 22088 22113 21969 22418 21952 22320 21728 22124 22109 21953 21981 22414 21841 22373 21712 22321 21745 22153 21941 22035 21821 22308 21746 22331 21584 22248 21056 22199 21908 22016 21872 22259 21715 22337 21527 22346 21586 22185 21813 21984 21868 21969 21751 22381 21475 22477 21516 22345 21748 22085 21893 22051 21684 22345 21586 22614 21361 22389 21602 22375 21673 22249 21738 22096 21682 22401 21479 22470 21319 22367 21621 22265 21723 22179 21818 22096 21688 22343 21590 22375 21539 22391 21504 22510 21575 22268 21559 22281 21504 22221 21586 22357 21600 22298 21376 22114 21646 22457 21516 22225 21476 22070 21624 22097 21650 22375 21314 22253 21594 22379 21408 22385 21623 22182 21467 22096 21428 22184 21473 22148 21384 22344 21351 22343 21315 22378 21492 22251 21367 22284 21519 21543 21925 22405 21839 22192 21193 22257 21463 22180 21368 22291 21746 22019 21577 22142 21693 22084 21700 22281 21545 22217 21383 22295 21687 93 87 75 3015 5793 6955 8232 8955 9854 43634 43689 37472 32352 28871 27367 25505 25277 24344 23802 23539 23360 23264 23131 22649 22807 22273 22779 22203 22897 22037 22336 22185 22157 22363 22113 22100 22333 21894 22394 21860 22408 21799 22243 22039 21922 21941 22001 22044 22017 21988 22298 21462 22507 21656 22472 21705 22067 21906 21913 22211 22024 21852 21839 22101 21909 22215 21782 22197 21696 22373 21570 22039 21874 22042 22039 21842 21906 22120 21958 22103 21931 22093 22239 21977 22098 21883 21915 22272 21956 22183 21644 22330 21592 22233 21740 22205 21944 21909 21891 22216 21705 22466 21425 22306 21687 22108 21712 22568 21845 22317 21718 22253 21836 21904 21921 22196 21668 22261 21408 22263 21817 22121 21729 22417 21447 22336 21755 22112 21749 22256 21540 22470 21377 22471 21699 22160 21696 22471 21444 22322 21721 22173 21773 22200 21719 22407 21517 22279 21760 22151 21705 22407 21346 22492 21629 22225 21746 22429 21616 22400 21624 22244 21358 22297 21613 22173 21579 22215 21480 22404 21626 22145 21584 21945 21536 22391 21799 22230 21337 22324 21376 22199 21392 22252 21417 22144 21589 22213 21793 22169 21207 117 57 6755 9338 11733 12511 13899 14299 14785 14532 43734 34729 30272 26938 25913 24503 24634 23549 23557 22902 23088 22097 22867 22338 22725 22140 22657 21854 22248 21979 22336 21799 22568 22000 22312 21575 22234 21786 22222 21920 22452 22023 22192 21993 21943 21446 22208 21845 22027 21735 22528 22011 22148 22188 22407 22085 22512 21936 22203 21717 22172 21498 21986 21534 22256 21696 21926 21529 21888 21708 21811 21710 21951 21654 22053 21556 21976 21803 21942 21740 21987 21760 22149 21585 21912 21573 21893 21899 21638 21911 22048 21976 22017 22197 21954 22418 21931 22531 21927 22285 22010 22115 21744 22016 21983 22183 22021 22176 22186 22152 22197 21934 21879 22002 21943 22087 22128 22280 22065 22423 21776 22125 21599 22155 21916 22363 21825 22294 22231 22025 21627 22371 21976 22325 21925 22253 21687 22401 21907 22516 21880 22258 21666 22196 21869 22453 21883 22331 21509 22279 21873 22399 21952 22233 21562 22382 21850 22486 21735 22187 21617 22490 21792 22496 21426 22357 21728 22612 21724 22205 21683 22466 21844 22369 21657 22281 21891 22503 21902 22243 21754 22600 21657 22235 21634 22560 21778 22551 21439 22583 21577 22359 4365 12424 14326 16199 16621 17997 17752 18457 17964 43671 31872 28041 25030 25036 23524 23681 22746 23265 22272 22935 22016 22985 21969 22233 21845 22619 21873 22547 21651 22600 21570 22369 21600 22554 21425 22263 21872 22564 21767 22417 21454 22528 21645 22596 21900 22376 21556 22518 21703 22148 21643 22306 21584 22166 21744 22296 21544 22323 21661 22201 21741 22414 21664 22389 21692 22368 21648 22133 21742 22279 21520 22380 21777 21978 21849 22276 21655 22166 21812 22034 21484 22386 21687 21949 21868 22194 21684 22452 21760 22216 21859 22401 21831 22091 22038 22157 21706 22505 21865 21921 21993 22255 20950 22101 21929 22027 21623 22439 21917 21989 22225 22071 21567 22189 22074 21973 21888 22224 21865 22400 22165 22025 21580 21955 21984 21648 22080 22043 22112 21854 22305 21780 22176 22211 21813 21915 22079 21809 22017 22016 22182 21973 22127 22071 21968 22322 22240 21693 22220 22038 21945 21893 22354 21670 22288 22028 22288 21953 22459 21731 22130 21859 21833 21907 22432 21649 22321 21986 22119 21811 22395 21635 22408 21969 22128 21772 22322 21559 22311 22023 22301 21657 22455 21652 22368 21881 22375 21768 22537 21698 22376 9997 16626 18053 19701 19118 20535 20085 20594 20401 21140 28455 25851 23868 23452 22765 23300 22169 22819 22210 22473 22069 22736 21693 22586 22106 22267 21936 22595 21510 22572 21883 22263 21690 22539 21593 22584 21616 22529 21815 22374 21597 22432 21667 22272 21609 22617 21632 22181 21731 22396 21591 22253 21545 22391 21616 22272 21563 22492 21525 21781 21879 22337 21428 22410 21592 22134 21652 22583 21476 22338 21704 22315 21617 21945 21804 22400 21427 22256 21661 22327 21762 22033 21632 22429 22305 22379 21514 22420 21631 22259 21765 22356 21717 22215 21697 22423 21748 22128 21668 22399 21650 22155 21725 22414 21516 22256 21876 22161 21627 22224 21737 22169 21751 22273 21648 22331 22101 22251 21858 22114 21639 22172 21878 22318 21820 22090 21652 22167 21788 21937 21587 22283 22152 22536 21911 22308 22103 22471 21911 22255 22144 22295 21968 22219 21970 22196 21833 22214 22023 22128 21790 22129 21938 22187 21992 22071 21867 22082 21922 22080 21947 22232 21912 22086 22127 21518 22141 22017 21985 21878 22360 21917 22289 21865 22198 21691 21920 21793 22058 22070 22304 21992 21883 22196 22261 22189 22065 21893 21977 22135 22350 21905 22100 21896 22218 21893 22031 21691 22272 21950 22285 21651 21627 21916 22294 21844 21992 21308 22551 21900 22151 21593 22090 21951 22522 21845 22278 21489 22177 21752 22476 21884 22452 21671 22084 21468 22353 21887 22505 21908 22392 21826 22229 21527 22077 21462 22410 21717 22539 21865 22548 21856 22441 21810 22503 21753 22488 21705 22437 21684 22278 21144 21926 21405 22020 21337 22064 21367 22003 21504 22096 21537 22144 21569 22159 21443 22330 21436 22149 21607 22483 21513 22361 21643 22309 21612 22295 21423 22129 21681 22266 21556 21815 21539 22329 21596 22219 21765 22372 21639 22250 21411 22276 21440 22163 21172 22188 21654 22209 21732 22329 21392 22357 21289 22242 21448 21845 21202 22336 21368 22231 21860 22135 21889 21793 21352 22189 21366 22297 21799 22154 21608 22116 21575 21888 21680 22232 21761 22125 21569 21961 21756 22107 21553 22304 21617 22218 21661 22208 21528 22285 21520 22176 21767 22033 21469 22147 21881 22214 21869 22020 21489 22042 21900 22127 21666 21971 21588 22117 21833 22124 21697 22028 21814 22403 21648 21872 21674 21869 22083 22272 21579 21934 21692 22812 22213 22272 21812 22051 22085 22452 21815 22017 21619 22364 21907 21959 21529 22048 22129 22225 21658 21871 22036 22103 21941 21910 21883 22044 22282 21949 21901 21928 22257 21789 22001 21787 22213 21940 21928 104 85 84 75 75 1612 2829 3597 4089 5087 43676 43683 35464 31781 29016 27559 25802 25541 24748 24469 23575 23810 23319 23384 22567 22905 22800 96 73 4107 7141 9250 9936 11433 11735 12451 43623 43693 36640 32138 28596 27655 25927 25245 24203 24495 23680 23548 22936 23469 22806 23277 22488 23136 92 7509 10782 13671 14080 15420 15590 16829 16209 43664 36616 31589 27616 26689 25195 25140 23768 24109 23367 23678 22615 23282 22689 23132 22240 22951 138 10457 13412 16374 16718 18125 17942 18992 18368 19456 37168 30413 26499 25815 24282 24304 23299 23672 22801 16733 17426 18785 18756 19936 19513 20309 19613 11351 14877 16910 17502 18546 18137 19120 18620 19561 18541 26584 23151 22777 21574 22039 21253 21376 21138 21421 20927 21388 20935 21292 20835 21465 20796 21214 20930 21376 20736 21453 20718 21301 20792 21287 20743 21207 20767 21175 20567 21367 20798 21252 20856 21182 20810 21369 20870 21105 20789 21335 20722 21097 21020 21207 20580 21418 20835 21136 20970 21236 20771 21111 20994 20919 20960 21514 20727 20911 21167 21229 20771 21280 20999 21079 20866 21344 20771 20920 21127 21181 20764 21141 20971 20951 20746 21452 20844 20903 21145 21066 20764 21165 21206 21276 21186 21083 21350 20967 21092 21006 21321 20667 21206 21139 21169 20845 21235 21108 20994 21088 21286 21371 20999 21143 21199 20712 21248 21083 20933 20825 21303 20887 21120 20962 21424 20883 21150 21031 21321 20783 21363 21010 21390 20678 21368 21023 21248 20758 21367 21047 21292 20693 21499 21099 21405 20712 21392 21044 21286 20544 21420 20952 21383 20578 21352 20905 21408 20513 21376 20913 21472 20661 21219 20721 21467 20903 21169 20528 21388 20901 21494 20776 21300 20702 21396 20887 21413 20723 21252 20870 21556 20708 21346 20632 21404 20606 21336 20633 20507 20644 21464 20595 21328 20659 21357 20779 21316 20807 21301 20685 21161 20673 21421 20636 21476 20465 21409 20641 21479 20587 21338 20595 21170 20574 21480 20837 21325 20579 21051 20696 21413 20807 21192 20648 21191 20751 21480 20854 21350 20736 21264 20662 21338 20777 21282 20676 21231 20711 21376 20968 21329 20848 21228 20634 21211 20736 21422 20806 21260 20685 21305 20758 21273 20992 21213 20807 21134 20629 21078 21025 21312 20920 21144 20729 21031 21089 21453 20781 21053 20747 20986 21043 21633 21073 21117 20794 21166 20781 21419 21013 21216 20655 21088 20690 21337 21236 21184 20853 21013 20797 21095 21296 21330 20885 20921 20854 21026 20910 21126 21127 21153 21228 20768 21021 20951 21299 21038 21348 20859 20976 20897 21319 21099 21402 21140 21443 20848 21114 21079 21333 21152 21154 21028 21027 20893 21291 21042 21467 21015 21335 20685 21147 21003 21425 21120 21433 21031 21046 20801 21400 21051 21545 20924 21560 20695 21253 20957 21491 20963 21312 20888 21271 20738 21325 20939 21592 20896 21408 20597 21269 20753 21539 20953 21614 20777 21346 20579 21441 20920 21543 20983 21441 20871 21192 20796 21507 20997 21555 20725 21262 20868 21440 20661 21571 20693 21313 20558 21472 20854 21386 20800 21322 20702 21346 20915 21384 20888 21528 90 145 82 620 1610 3689 3691 4975 5071 43647 41344 34536 29808 27884 25778 113 2437 7362 9005 10756 10919 12366 12299 12967 43613 41689 33418 30056 27287 26295 115 7783 11376 13972 14640 15840 15814 16835 16196 16978 38626 31795 27957 26724 24753 4932 11562 15197 16519 17648 17671 18572 18546 18901 18546 35755 28872 26725 25083 24245 23235 16074 17924 19488 19835 20025 19789 20224 20164 20829 30369 25956 23971 23418 22848 23047 22488 22328 21927 22112 21760 21895 22109 21817 21274 21465 22003 21674 21984 21565 21652 21383 21731 21659 21794 21454 21481 21461 21605 21576 21733 21156 21591 21351 21721 21389 21706 21223 21490 21315 21771 21313 21658 21115 21596 21393 21751 21383 21946 21061 21568 21333 21793 21232 21535 21006 21809 21255 21821 21036 21541 21033 21812 21142 21788 20749 21562 21087 21768 21237 21617 21031 21531 21190 21780 21114 21639 20843 21743 21070 21768 20999 21655 20952 21671 21063 21675 20930 21516 20875 21683 21061 21537 20997 21495 21053 21657 20927 21690 20781 21736 20951 21606 20867 21578 20850 21538 20919 21667 20983 21577 20883 21389 21108 21655 
