# Supplementary material for: An Active Feature Selection Strategy for DWT in Artificial Taste
Source: Hindawi journal article supplement (doi:10.1155/2018/9709505), 2018-01-01
Supplement: f1 [file 9709505.f1.zip › beer-hi-3.txt]

43456 43448 43318 43464 57 7537 17128 19641 21291 21753 22057 22208 22545 22852 22796 22609 22773 22940 22912 23335 22613 23192 22953 23536 22965 23112 23097 23538 23225 23080 22985 23526 23253 23450 22929 23605 23143 23609 22974 23408 23244 23664 23025 23545 23066 23751 23143 23410 23014 23683 23233 23685 22928 23544 23211 23808 22412 23610 23052 23892 23052 23709 22881 23759 23237 23758 22938 23685 23193 23820 23123 23501 23194 23912 22905 23634 23156 23701 23053 24055 22992 23754 23141 23486 23149 23639 23047 23842 23009 23769 22945 23751 22928 23776 23031 23697 23077 23642 23143 23579 23047 23548 23249 23625 23285 23680 23228 23561 23207 23603 23195 23515 23116 23512 23220 23545 23104 23448 23302 23328 23147 23296 23171 23383 23030 23233 23211 23481 23261 23510 23442 23706 23604 23658 23372 23502 23148 23398 23164 23300 22990 23240 23201 23473 23509 23692 23398 23345 23698 23241 23697 22963 23522 23178 23495 23329 23731 23432 23556 22868 23373 23232 23629 23245 23723 23282 23604 23173 23360 23062 23680 23278 23821 23188 23685 23218 23500 23096 23730 23175 23837 23092 23845 22871 61 14697 18205 18714 20149 19781 20748 20464 21368 21017 35712 27789 26148 24622 24999 24123 24600 23480 24199 23420 24242 23536 24089 23313 23928 23404 23997 23394 23968 23200 23765 23237 23874 23091 23836 23070 23625 23257 23860 23270 23639 23315 23704 23373 23660 23247 23631 23133 23729 23271 23601 23211 23568 23111 23860 23300 23591 23133 23361 23397 23736 23364 23417 23240 23540 23648 23616 23180 23271 23279 23739 23450 23392 23355 23362 23616 23598 23425 23360 23331 23520 23756 23504 23221 23445 23402 23374 23738 23386 23549 23118 23824 23396 23651 23188 23436 23344 23727 23398 23490 23190 23833 23228 23869 23165 23607 23434 23696 23321 23519 22995 23913 23296 23703 23034 23661 23258 23924 23136 23652 23174 23925 23265 23589 22984 23902 23254 23861 22997 23800 23260 23925 23157 23682 23206 23920 23109 23617 23264 23784 23047 23541 23090 23827 23022 23649 23041 23655 23185 23634 22935 23781 23057 23704 23072 23616 23210 23740 23076 23601 23118 23655 23216 23989 23217 23771 23193 23539 23240 23715 23204 23669 23238 23597 23200 23433 23127 23680 23258 23557 23268 23665 23386 23541 23357 23671 23446 23696 23273 23732 23207 23328 15469 19104 19895 20823 21108 21568 21368 21385 21704 41831 27841 25580 24953 24653 24081 24118 23739 23782 24096 23355 23917 23576 24029 23488 23777 23564 23744 23178 23648 23637 23751 23239 23757 23479 23729 23136 23814 23296 23815 22981 23762 23360 23767 23119 23758 23365 23756 23161 23712 23257 23872 22949 23824 23201 23831 22897 23896 23255 23819 22962 23900 23268 23587 23130 23780 23313 23633 23093 23863 23183 23639 23116 23941 22930 23671 23087 23756 22928 23651 23148 23649 23176 23678 23188 23572 23140 23648 23096 23797 23072 23772 23105 23638 22886 23793 23164 23502 23060 23672 23154 23452 23203 23599 23136 23400 23221 23664 23168 23512 23320 23606 23091 23393 23267 23485 23097 23340 23434 23568 23174 23300 23520 23504 23193 23334 23479 23512 23127 23352 23445 23431 23244 23537 23449 23406 23089 23466 23462 23370 23036 23623 23388 23261 23200 23691 23693 23219 23385 23329 23755 22979 23728 23351 23557 23247 23717 23464 23476 23352 23766 23271 23605 23395 23725 23105 23704 23407 23664 23127 23776 23431 23591 23085 23758 23235 23573 23205 23862 23083 23546 23213 23947 23117 23592 23204 23883 22902 23808 23203 23785 22872 15520 19590 21335 20992 22076 21846 22581 21897 22615 22183 28135 24853 24880 23913 24275 23488 23968 23386 23975 23239 23879 23458 23740 23141 23792 23160 23761 23076 23754 23216 23698 23049 23620 23297 23680 23089 23474 23288 23593 23079 23479 23271 23625 23232 23606 23232 23639 23200 23536 23161 23616 23236 23640 23296 23561 23651 23468 23195 23648 23441 23465 23315 23437 23110 23404 23349 23604 23552 23680 23272 23468 23217 23152 23259 23424 23481 23687 23609 23529 23444 23582 23379 23360 23205 23318 23337 23471 23385 23074 23637 23159 23723 23286 23662 23416 23648 23474 23716 23432 23724 23417 23687 23437 23730 23301 23820 23348 23726 23260 23726 23214 23707 23002 23454 23216 23665 23204 23908 23339 23813 23095 23625 23014 23769 23273 23814 23151 23686 22956 23696 23158 23868 23200 23609 23032 23754 23272 23862 23244 23526 23195 23824 23248 23824 23108 23616 23003 23632 23063 23769 23198 23588 23210 23625 23162 23757 23207 23644 22951 23670 23052 23654 23168 23766 23029 23668 23134 23577 23126 23626 23197 23641 23223 23571 23060 23492 23181 23534 23120 23516 23131 23513 23171 23537 23171 23604 23084 23520 23083 23372 23145 23271 20631 21818 21957 22386 22250 22519 22539 22734 22633 28067 24677 24148 23737 23776 23570 23597 23538 23633 23489 23639 23513 23424 23385 23422 23363 23417 23325 23636 23789 23424 23746 23319 23701 23221 23577 23186 23560 23190 24037 23105 23562 23077 23352 22994 23493 23155 23633 23126 23673 23258 23673 23277 23765 23317 23794 23365 23780 23200 23700 23249 23489 23044 23488 23140 23686 23137 23816 23220 23864 23209 23827 23030 24304 22863 23584 23047 23740 23117 23825 23239 23851 23243 23747 22934 23504 22933 23731 23115 23725 22979 23758 23031 23376 22997 23575 23080 23688 23105 23584 22962 23680 22988 23552 23047 23764 23033 23689 23104 23692 23000 23575 23156 23541 23055 23547 23024 23520 23248 23662 23200 23544 23081 23511 23040 23639 23261 23488 23120 23555 23278 23332 23297 23658 23307 23536 23666 23334 23404 23623 23367 23527 23316 23268 23456 23745 23353 23405 23149 23340 23402 23763 23460 23375 23238 23227 23431 23784 23247 23242 23205 23383 23624 23447 23572 23355 23392 23062 23704 23287 23708 23192 23453 23173 23687 23372 23568 23183 23401 23264 23781 23341 23655 23044 23558 23195 23676 23290 23449 22984 23671 23356 21952 22324 22853 22533 23264 22808 23435 22753 23237 22768 24659 23714 24064 23123 23784 23181 23888 23320 23850 22848 23655 23228 23834 23248 23791 23074 23708 23228 23817 23222 23620 23132 23849 22923 23488 23011 23773 23045 23602 22905 23648 23226 23543 23034 23701 23027 23784 23022 23695 23017 23616 23114 23655 23032 23702 23015 23628 23129 23496 23204 23600 23236 23557 23117 23355 23143 23707 23108 23559 23250 23607 23213 23613 23147 23497 23125 23504 23205 23355 23043 23392 23367 23507 23124 23303 23287 23687 23391 23332 23168 23485 23592 23399 23040 23262 23427 23708 23319 23271 23001 23552 23560 23384 23125 23274 23594 23446 23248 23082 23448 23200 23750 23192 23521 23072 23626 23308 23584 22999 23552 23413 23671 23057 23511 23276 23709 23181 23472 23146 23735 23239 23478 23136 23825 23345 23734 22964 23726 23267 23703 23008 23626 23153 23778 23063 23558 23157 23829 23145 23586 22976 23808 23155 23701 22872 23696 23140 23818 22929 23586 23165 23893 23146 23519 23068 23789 23118 23629 22853 23765 22941 23656 22856 23661 23045 23565 22980 23575 23260 23644 23024 23499 22965 23687 22999 23574 22886 23623 23028 23623 23029 23672 23175 23444 23018 23461 23323 23690 23090 23514 23164 23725 23011 23565 23004 23573 23175 23477 23267 23400 23225 23617 23106 23325 23239 23685 23273 23354 23024 23624 23393 23457 23175 23216 23150 23435 23540 23757 23404 23381 23256 23301 23064 23158 23121 23297 23212 23467 23387 23656 23546 23628 23463 23333 23323 23223 23443 23004 23466 23301 23580 23204 23653 23364 23635 23289 23607 23319 23517 23147 23296 23052 23531 23248 23646 23309 23722 23227 23541 22906 23499 23009 23672 23293 23776 23140 23704 23044 23512 23001 23657 23216 23725 23171 23559 22914 23745 23205 23725 22871 23744 23093 23752 22857 23687 23248 23654 22888 23789 23171 23468 23210 23764 22905 23764 22976 23655 22932 23567 23012 23645 22950 23680 23152 23537 23079 23640 22997 23552 23008 23701 23008 23512 22903 23657 22922 23682 22907 23450 22983 23526 23147 23624 23185 23527 23126 23388 23101 23517 23098 23631 23176 23592 23144 23440 23009 23437 23146 23515 23485 23321 23122 23343 23173 23361 23104 23332 23067 23416 23068 23290 23136 23313 23027 23164 23056 23192 23184 23384 23399 23704 23464 23467 23348 23336 23186 23153 23131 23392 23601 23752 23541 23412 23635 23275 23383 22933 23458 23160 23761 23338 23691 23204 23513 23120 23547 23303 23652 23249 23546 23079 23597 23215 23813 23035 23481 23116 23713 23282 23540 10837 17698 18818 19982 19790 20813 20720 21328 20745 43455 30535 27338 25255 25106 24384 24669 23572 24280 23744 24118 23271 24182 23447 23848 23184 24101 23364 16750 19281 21027 20640 21838 21596 22129 21610 22464 40275 27992 25425 25205 24036 24640 23650 24306 23616 24130 23116 24004 23399 24231 23421 23802 23319 55 18956 21591 21273 22224 21544 22681 22076 22533 22348 30368 25404 24981 24039 24224 23797 23916 23474 23923 23338 23734 23335 23644 23406 23667 23227 23749 16706 21453 21713 22629 22244 22675 22455 23036 22608 23085 26131 24440 24124 23927 23628 23957 23506 23749 23508 23415 23744 23499 23355 23667 23207 23916 23348 21316 22615 22648 22955 22976 22674 23271 22926 23324 23015 24267 24007 23542 23729 23491 23342 23477 23657 23364 23888 23143 23762 23248 23584 23419 23399 23288 23586 23176 23656 23077 23578 23469 23404 23415 23688 23176 23809 22888 23708 23249 23681 23307 23454 23356 23760 23254 23719 23070 23936 22896 23728 23139 23665 23219 23528 23223 23704 23140 23820 22956 23880 23050 23699 23189 23634 23192 23742 23079 23816 22949 23925 22927 23758 23240 23726 23182 23528 23249 23608 23217 23740 23114 23827 22912 23840 22801 23776 22934 23756 22997 23561 23002 23698 23115 23585 23151 23495 23001 23767 23032 23792 22963 23719 23077 23693 23088 23620 23129 23685 23013 23630 23138 23727 23072 23599 23049 23514 23120 23606 23243 23473 23240 23548 23146 23579 23075 23641 23286 23589 23137 23516 23104 23300 23200 23729 23158 23431 23096 23436 23040 23524 23225 23554 23159 23424 23160 23253 23299 23434 23527 23437 23325 23388 23055 23539 23012 23638 23075 23630 23193 23348 23302 23192 23456 23232 23412 23335 23280 23396 23090 23501 23303 23729 23101 23212 23651 23112 23800 23089 23656 23148 23586 23332 23356 23348 23328 23300 23607 23229 23581 23193 23543 23283 23504 23334 23460 23282 23386 23277 23593 23125 23738 23061 23636 22891 23736 23185 23700 23173 23581 23195 23517 23144 23716 23015 23832 22990 23797 22887 23705 23079 23732 23152 23589 23085 23751 23088 23760 22966 23833 22850 23776 23104 23767 23044 23705 23232 23456 23161 23639 23144 23659 22929 23882 22912 23790 22920 23671 22892 23624 22988 23680 23082 23523 23046 23748 22951 23424 23126 23499 23079 23608 22852 23645 22896 23696 23009 23443 22989 23622 23009 23576 23147 23617 23033 23552 23262 23442 23094 23485 23097 23621 23068 23527 23241 23520 23020 23619 23165 23416 23287 23505 23371 23530 23088 23420 23034 23516 23259 23484 23123 23494 23188 23629 23364 23404 23089 23197 23210 23547 23364 23474 23184 23239 23204 23680 23437 23365 23084 23516 23043 23447 23511 23622 23215 23163 23126 23145 23120 23298 23516 23645 23323 23350 23308 23168 23238 23149 23273 23127 23400 23224 23717 23277 23616 23271 23271 23021 23433 23108 23592 23274 23595 23362 23576 23321 23589 23238 23520 22936 23424 23076 23616 23192 23744 23338 23811 23248 23957 23028 23571 23040 23724 23145 23794 23157 23680 22897 23477 22977 23727 23137 23762 23253 23720 23416 23527 23026 23776 23149 23879 23095 23662 22791 23681 23040 23848 57 16466 17988 19733 19924 20870 20644 21277 20730 21384 36690 28504 25812 25498 24365 24513 16904 20498 20723 21821 21483 22180 21895 22339 21860 41448 27376 25932 24605 24717 23836 17774 20440 22174 21722 22544 21920 22728 22350 22893 22192 27448 24944 24930 23958 24288 16326 21707 22117 22800 22344 23126 22564 23054 22760 23028 26648 24883 24078 24143 23658 23729 22160 23124 22857 22946 22771 23341 23045 23212 22795 26081 24186 23976 23693 23783 23663 23717 23329 23573 23650 23631 23296 23399 23591 23520 23174 23437 23632 23523 23209 23340 23688 23459 23193 23277 23596 23481 23272 23381 23574 23470 23172 23319 23644 23425 23592 23076 23624 23323 23703 23054 23687 23310 23669 23252 23680 23236 23432 23271 23600 23304 23426 23223 23599 23387 23414 23197 23753 23115 23516 23189 23840 23109 23453 23215 23783 23095 23604 23290 23799 23152 23505 23251 23685 23029 23703 23260 23726 22913 23719 23220 23553 23117 23785 23082 23552 23132 23783 22966 23725 23163 23749 22919 23761 23159 23450 23076 23836 23198 23650 23221 23671 22965 23785 23261 23529 23168 23844 23041 23799 22882 23634 23037 23619 
21408 21889 21719 21435 21597 21677 22147 21715 21973 21445 21864 21511 22137 21672 21942 21345 21926 21747 21977 21593 21717 21520 21973 21601 21886 21420 21831 21686 22102 21612 21827 21351 21998 21738 22122 21516 21821 21323 21015 21610 21076 21471 21046 21652 21120 21473 21163 21445 21255 21648 21111 21444 21338 21708 21300 21533 21187 21623 21382 21557 21360 21490 21556 21531 21317 21402 21556 21681 21347 21387 21340 21864 21444 21472 21203 21660 21585 21429 21296 21388 21801 21564 21886 21241 21637 21308 21890 21368 21937 21382 21666 21357 21724 21539 21746 21532 21881 21421 21836 21293 21705 21260 21871 21413 21884 21549 22037 21436 21989 21312 21632 21208 21896 21163 21745 21152 21773 21126 21837 21223 21944 21125 21937 21117 21955 21238 21949 21223 21997 21358 21936 21397 21895 21416 22080 21361 22008 21223 22004 21020 22001 21160 21993 21217 21863 21191 21812 21333 21840 21319 21784 21174 21985 21257 21929 21161 21938 21147 21671 21191 21830 21375 21847 21352 21761 21324 21756 21271 21815 21472 21753 21352 21704 21305 21677 21288 21782 21380 21773 21429 21693 21320 21550 21399 64 7262 12833 15175 16504 17341 18237 18382 18743 18705 35740 26805 24643 23640 23005 22375 22210 21836 21888 22023 22082 21748 21710 21723 21430 21859 21735 22055 21499 21697 21431 21852 21717 21889 21719 21696 21451 21953 21633 21813 21287 21906 21463 21941 21605 21984 21303 21949 21473 22100 21495 22071 21275 21993 21424 22107 21415 21792 21294 22016 21504 22044 21221 21928 21298 22201 21342 21937 21171 22061 21525 22055 21505 21779 21342 22165 21556 22013 21120 22024 21383 21969 21241 21831 21296 21962 21417 21937 21190 21856 21337 22019 21195 21889 21244 21985 21188 21936 21267 21813 21429 21835 21307 21664 21449 21896 21441 21815 21177 21753 21468 21865 21417 21856 21408 21844 21512 21778 21393 21967 21665 21853 21445 21737 21769 21788 21420 21499 21628 21800 21556 21991 21393 21974 21598 21645 21381 21915 21752 21678 21495 21660 21925 21767 21443 21367 21733 21642 22103 21192 21925 21481 22005 21480 21683 21588 21871 21628 21540 21443 21925 21588 21956 21273 22040 21500 21928 21349 21971 21573 21639 21311 22048 21501 22056 21176 22103 21528 21974 21220 22060 21461 22045 21143 22252 21385 22112 21128 22144 21448 22001 51 11377 15956 18194 18359 19663 19365 20029 19545 20562 40608 27232 24020 23597 22464 22497 21904 22331 21893 22064 21453 22154 21290 22121 21300 22100 21271 22039 21459 22056 21307 21968 21456 21942 21398 21762 21431 21773 21321 21811 21433 21891 21446 21821 21495 21852 21406 21623 21351 21861 21505 21607 21559 21844 21505 21373 21619 21771 21415 21555 21609 21705 21393 21709 21813 21802 21460 21656 21713 21739 21616 21789 21815 21587 21424 21867 21693 21577 21402 21864 21797 21625 21664 21469 22062 21376 21827 21449 21942 21436 21617 21575 21996 21341 21778 21613 21941 21320 21896 21633 21917 21185 22133 21543 21689 21367 21968 21555 21803 21222 22069 21416 21805 21383 22039 21491 21753 21431 22099 21335 21948 21271 22171 21432 21832 21312 22144 21302 21881 21308 22119 21383 21825 21469 22173 21371 21812 21377 22144 21079 22095 21271 21899 21175 22051 21310 21783 21475 21964 21173 22030 21413 21927 21144 21911 21280 21897 21149 22071 21373 21877 21317 21937 21353 21939 21453 21871 21316 21665 21384 21826 21655 21803 21511 21747 21293 22088 21405 21700 21253 21831 21570 21776 21341 21959 21588 21603 21445 21864 21589 21697 21666 11477 17367 18960 19732 20366 20174 20480 20661 21015 20759 26513 23745 23211 22285 22120 21816 22245 21787 21798 21658 21771 21984 21567 21831 21470 22092 21482 21707 21599 21954 21611 21741 21617 21952 21655 21900 21519 22075 21498 21745 21335 21938 21516 21874 21321 21992 21575 22101 21352 21940 21441 22036 21474 22039 21284 21795 21277 21999 21504 22141 21436 22029 21226 22000 21297 22053 21441 22152 21457 21980 21258 21810 21227 21910 21458 22156 21399 22167 21203 22004 21116 21880 21108 21781 21139 21816 21432 21904 21389 22016 21306 22016 21370 21962 21159 21929 21237 21869 21266 21839 21331 21850 21397 21876 21365 21867 21337 21868 21378 21797 21427 21920 21473 21805 21442 21706 21564 21790 21433 21882 21478 21972 21384 21745 21399 21730 21672 21815 21469 21676 21500 21753 21726 22011 21460 21451 21351 21729 21870 21797 21292 21612 21491 21772 21840 21803 21376 21536 21512 21736 21917 21761 21419 21647 21957 21540 21996 21479 21947 21282 21817 21673 21904 21616 21812 21365 21664 21469 21956 21555 22097 21527 21959 21398 21813 21348 21654 21355 21960 21493 22058 21527 22061 21456 22007 21526 22009 21385 21944 21278 21845 49 18604 19424 20739 20217 21176 20610 21468 20912 21643 27461 23704 22068 22496 21740 22235 21577 22200 21484 22183 21223 21961 21161 21888 21178 21888 21421 21928 21306 21849 21337 21840 21169 21921 21092 21843 21159 21824 21130 21883 21280 21921 21273 21860 21381 21911 21463 21952 21481 21954 21409 21820 21440 21836 21367 21701 21269 21143 21384 21703 21225 21880 21461 21925 21565 21866 21504 21925 21616 21756 21468 21612 21478 21533 21528 21917 21815 21895 21579 21735 21641 21603 21525 21481 21574 21784 21736 21901 21719 21809 21465 21543 21355 21579 21613 21586 21812 21614 21991 21376 22055 21218 21867 21568 21843 21612 21863 21465 21681 21415 21808 21569 21990 21572 22001 21370 21744 21391 21957 21644 22097 21351 21831 21258 22011 21399 22035 21497 22029 21088 21891 21307 22128 21504 22233 21248 21902 21264 22101 21388 22100 21437 21939 21299 22028 21414 22075 21009 21777 21283 21995 21506 22129 21459 21862 21261 22057 21277 21892 21163 21958 21404 22038 21369 21748 21161 21918 21427 22073 21195 21917 21082 21993 21344 21978 21205 21965 21303 21965 21286 21756 21355 21864 21466 21863 21308 21821 21270 21829 21472 21848 21452 19396 20365 21315 21024 21439 21049 21351 21061 21681 36341 23020 21851 21985 21600 22023 21653 21793 21567 21561 21504 21904 21577 21651 21430 21779 21843 21812 21458 21561 21410 21989 21625 21696 21383 21665 21812 21794 21461 21530 21600 21664 21851 21515 22049 21289 22006 21496 22048 21431 21664 21559 21848 21572 21675 21472 21876 21509 21937 21479 21835 21470 21995 21408 21969 21414 22028 21515 22002 21292 21823 21383 22036 21397 21733 21319 22092 21568 21966 21181 21975 21426 22116 21365 21850 21252 22087 21393 22068 21241 21949 21363 22132 21319 21842 21321 22002 21526 22023 21111 21994 21293 22054 21113 21908 21385 22001 21319 21933 21351 22050 21417 21984 21150 22037 21417 22085 21180 21767 21213 22000 21288 21748 21223 21936 21330 21781 21297 21895 21385 21810 21309 21844 21441 21817 21335 21703 21497 21870 21345 21915 21307 21998 21399 21740 21233 21811 21522 21796 21369 21804 21623 21714 21517 21611 21629 21746 21444 21814 21556 21860 21576 21565 21371 21822 21832 21705 21440 21517 21749 21856 21519 21404 21605 21904 21568 21479 21712 21442 21975 21607 21737 21361 21910 21632 21828 21265 21798 21702 21897 21313 21751 21529 21989 21539 21693 21322 22022 21560 21937 21372 21885 21472 21992 21345 21961 21485 22163 21411 21799 21303 22061 21476 21786 21255 22120 21468 22037 21184 22020 21328 22204 21319 21905 21083 22024 21447 22050 21373 22130 21483 21926 21304 21812 21164 21959 21234 22139 21349 22084 21244 21945 21307 22048 21368 22016 21607 22067 21236 21952 21069 21760 21365 21920 21220 21888 21206 21965 21276 21914 21433 21894 21367 21733 21236 21795 21354 21772 21450 21900 21476 21899 21333 21930 21296 21738 21408 21829 21541 21941 21270 21700 21365 21808 21754 21823 21368 21924 21559 21796 21488 21637 21487 21768 21540 21560 21473 21900 21367 21548 21553 21687 21408 21692 21816 21560 21626 21975 21351 21662 21841 21464 21448 21720 21574 21291 21952 21519 21836 21317 21935 21638 21866 21438 21888 21562 21972 21522 21743 21447 21838 21541 22007 21498 21939 21457 21821 21224 21745 21504 22106 21445 22121 21465 22029 21430 21901 21350 21929 21206 21773 21211 21888 21347 22022 21200 21816 21248 22029 21129 21876 21140 21857 21154 21816 21208 21904 21253 21996 21424 22141 21440 22209 21328 22077 21064 21959 21121 22076 21213 21969 21259 21899 21231 22046 21324 21785 21340 21968 21132 22032 21092 22064 21149 22018 21314 22071 21224 21956 21228 21805 21504 21880 21306 21927 21303 21831 21401 21924 21362 21762 64 10807 14394 16803 17385 18477 18290 19207 18800 43331 33065 26933 23958 23565 22510 22498 21920 22319 21697 21693 21793 21964 21755 21680 21760 21789 151 10652 16528 18620 19276 20144 19761 20137 20459 20439 43362 28016 24412 23129 22651 22541 21981 22016 21923 21815 21836 21717 22034 21351 22155 21581 21785 57 16347 18503 20090 20259 20758 20711 20910 20756 21342 31082 24969 23147 22722 21970 22480 21582 22116 21812 21860 21565 22138 21371 22169 21632 21921 21549 12897 18780 20661 20190 21352 20573 21467 20992 21460 20996 25940 22728 22932 21636 22430 21598 22169 21455 22209 21313 22272 21199 22108 21468 21987 21543 21826 18608 21096 20599 21700 20981 21738 21006 21821 21056 36560 22633 22576 21544 22169 21481 22091 21383 21938 21376 21855 21340 21938 21143 22059 21095 21942 21287 21875 21378 21856 21194 21936 21201 22087 21461 21872 21472 21818 21418 21813 21305 21789 21313 21939 21435 21780 21422 21829 21507 21649 21358 21933 21313 21959 21373 21964 21337 21658 21530 21774 21628 21705 21233 21923 21307 21908 21515 21725 21530 21444 21633 21627 21703 21681 21381 21904 21353 22058 21493 21827 21591 21613 21594 21974 21793 21511 21599 21701 21323 21858 21362 21997 21581 21592 21782 21248 21751 21475 21865 21588 21807 21511 21808 21442 21929 21495 21889 21559 21868 21604 21872 21604 21687 21651 21781 21573 22195 21509 22084 21345 22087 21218 21970 21392 22009 21400 21912 21479 21829 21483 21997 21528 21988 21376 22062 21290 22128 21288 22072 21337 21999 21440 21880 21426 21998 21365 22109 21294 22072 21133 22172 21198 22144 20792 22039 21470 21959 21515 21748 21401 21952 21368 22043 21305 22137 21191 22149 21179 22120 21255 22156 21214 21985 21291 21881 21303 21760 21386 21661 21239 22007 21265 21999 21107 21965 21220 21979 21213 21991 21377 21865 21362 21809 21362 21770 21300 21885 21369 21804 21405 21743 21495 21909 21511 21824 21376 21749 21305 21901 21332 21869 21319 21863 21434 21752 21451 21691 21483 21721 21400 21786 21285 21817 21286 21836 21473 21703 21521 21565 21639 21635 21753 21680 21489 21779 21402 21764 21632 21901 21431 21709 21613 21511 21891 21537 21553 21635 21303 21879 21494 21953 21539 21465 21840 21563 21617 21797 21903 21548 21975 21249 22004 21441 21935 21655 21783 21624 21929 21485 22050 21431 21907 21655 21595 21630 21933 21556 22115 21185 21953 21555 21865 21409 21984 21360 21989 21624 21924 21443 21964 21323 22077 21445 21939 21480 22183 21309 21914 21415 22048 21436 21780 21219 22075 21406 22151 20615 21869 21263 22035 21461 22151 21258 21948 21216 22039 21383 22176 21415 21835 21169 22039 21497 22058 21520 22112 21229 21901 21252 22119 21299 22023 21201 22007 21216 21981 21177 21964 21344 21991 21429 21808 21312 21852 21251 21745 21021 21886 21269 22050 21273 21911 21143 21930 21192 21892 21667 21972 21384 21865 21385 21945 21517 21878 21351 21821 21451 22133 21330 21847 21451 21929 21433 21867 21456 21765 21323 21665 21280 21895 21447 21786 21505 21783 21450 21589 21413 21843 21708 21920 21574 21718 21313 21577 21572 21907 21557 21744 0 6712 14144 17077 17866 18667 18855 19233 19478 19963 43355 28832 24903 23640 22814 22722 11799 17581 19062 19897 20188 20706 20719 20610 20712 43349 27905 24512 23829 22540 22544 11917 18720 19787 20711 20588 20944 20948 21315 21093 43371 26688 24055 23003 22849 22081 12193 19057 20811 20624 21332 20839 21489 21240 21658 20792 26161 23173 22960 22181 22263 7385 20622 20797 21567 21057 21843 21224 21945 20948 21842 24681 23098 21929 22286 21655 22400 21453 22093 21469 22336 21472 21943 21453 22178 21426 21847 21476 22064 21550 21873 21453 22128 21364 21991 21259 22167 21169 21966 21388 21947 21280 21943 21352 22061 21264 21760 21484 21865 21339 21917 21324 21989 20523 22108 21255 22021 21294 22052 21225 22009 21271 22041 21472 21792 21287 21932 21471 21946 21368 21892 21428 21832 21327 21909 21402 21861 21300 21929 21485 21809 21400 21814 21440 21674 21472 21853 21405 21689 21545 21754 21441 21776 21547 21693 21293 21923 21631 21752 21519 21875 21440 21666 21765 21700 21303 21863 21531 21671 21517 21957 21511 21498 21819 21740 21613 21822 21679 21592 21690 21819 21495 21618 21821 21591 
22108 21669 21480 21687 22017 21749 21909 21471 21807 21676 21974 21621 21892 21580 21888 21711 21901 21572 21909 21518 21919 21643 21993 21574 21926 21598 21913 21650 21939 21720 21996 21792 21902 21619 21830 21615 22070 21575 21860 21688 21856 21737 21904 21608 22157 21568 22095 21709 21789 21763 21837 21859 21964 21705 21627 21607 21964 21712 21771 21504 21843 21945 21924 21504 21696 21776 22056 21773 21817 21789 21827 21916 21875 21671 21689 21319 21705 21322 21705 21471 21724 21453 21559 21510 21913 21301 21809 21437 21635 21320 21865 21541 21768 21360 21725 21594 21735 21549 21700 21480 21876 21446 21685 21518 21689 21418 21664 21433 21704 21453 21797 21495 21818 21489 21797 21632 21943 21618 22024 21693 21965 21813 21773 21767 21892 21709 21830 21543 21697 21571 21691 21545 21558 21485 21575 21296 21613 21465 21685 21696 21984 21884 21879 21550 21745 21669 21734 21586 21486 21642 21665 21910 21709 21924 21696 21573 21383 21643 21601 21736 21602 21852 21756 21847 21537 21674 21589 21866 21752 22004 21728 21783 21520 21687 21591 21940 21675 22000 21628 22003 21459 21840 21652 21954 6369 11968 13550 15161 15789 16916 16977 17721 17478 43342 25368 23307 22272 22340 21763 22085 21480 21920 21548 21766 21429 21768 21326 21863 21610 21832 21445 21768 21318 21895 21516 21915 21456 21751 21504 21916 21555 21760 21518 21788 21621 21965 21445 21816 21589 21805 21559 21841 21562 21741 21605 21853 21627 21808 21536 21696 21450 21962 21735 21851 21508 21573 21719 21947 21604 21713 21540 21799 21837 21751 21466 21600 21583 22024 21610 21635 21444 21620 21798 21980 21624 21610 21584 21751 21756 21820 21864 21633 21775 21698 21858 21763 21634 21603 21827 21775 21808 21485 21656 21809 21889 21720 21594 21557 21959 21736 21847 21453 21788 21841 21882 21636 21872 21565 21914 21761 21820 21424 21880 21689 21893 21515 21835 21622 22055 21493 21812 21600 21937 21738 21954 21486 21908 21772 21955 21399 21959 21583 22055 21499 21830 21623 21800 21520 21819 21584 21891 21545 21927 21613 21915 21479 21863 21387 22031 21360 21882 21601 21952 21620 21809 21554 21788 21599 21815 21555 21764 21651 21849 21573 21889 21634 21801 21432 21792 21632 21824 21591 21819 21745 21876 21530 21712 21856 21841 21520 21623 21783 21802 21485 21581 3157 14817 16599 17803 18688 18960 19064 19473 19863 19889 27361 23381 22596 22167 21777 21814 21927 21914 21829 21546 21926 21876 21829 21556 21893 21799 21556 21582 21803 21782 21550 21538 21856 21792 21834 21555 21932 21699 21614 21677 21839 21783 21819 21598 21943 21712 21893 21557 22025 21705 21704 21527 22035 21595 21796 21609 21937 21623 21721 21649 22005 21587 21821 21649 22062 21513 21794 21639 22038 21356 21895 21577 22023 21393 22009 21548 21883 21539 22018 21527 21910 21424 21988 21442 21882 21408 22103 21468 21169 21539 21934 21495 21778 21633 21929 21501 21762 21677 21866 21594 21819 21744 21784 21897 21842 21571 21817 21568 21863 21613 21797 21597 21893 21689 21761 21401 21913 21734 21880 21572 21842 21667 21763 21440 21897 21664 21714 21516 22032 21654 21676 21596 22104 21565 21871 21648 22050 21682 21641 21709 21877 21545 21688 21943 21725 21488 21511 21831 21778 21575 21728 21932 21587 21580 21765 21920 21504 21728 21825 21808 21536 21897 21838 21736 21641 22004 21729 21625 21644 21926 21696 21780 21760 21901 21529 21890 21744 21861 21435 21921 21787 21900 21516 22017 21655 21883 21512 22045 21665 21972 21527 22052 16649 19209 19635 20516 20411 20847 20695 21160 20843 33111 23181 22695 21847 22056 21518 22112 21560 21873 21545 22098 21625 21863 21562 21975 21516 21841 21395 21936 21426 21824 21376 21965 21533 21873 21408 21875 21591 21853 21538 21898 21649 21895 21778 21849 21705 21888 21521 21870 21645 21975 21496 21876 21543 21748 21520 21911 21764 21843 21617 21827 21507 21719 21777 21994 21729 21879 21609 21705 21575 21640 21552 21915 21854 22012 21696 21768 21608 21821 21515 22125 21482 21606 21609 21760 21792 21692 21706 21792 21828 21819 21973 21701 21980 21737 21809 21843 21588 21637 21571 21484 21677 21429 21702 21419 21747 21611 21824 21632 21834 21816 22010 21818 22016 21653 21932 21634 21733 21526 21896 21697 21956 21709 21996 21534 21802 21543 22045 21674 22023 21483 21863 21600 22087 21723 21920 21434 22043 21614 22016 21705 21936 21429 21962 21656 22145 21660 21991 21469 21901 21490 21840 21608 22004 21539 21769 21642 21904 21463 22043 21479 21764 21497 21909 21591 21932 21683 21982 21542 21728 21550 21944 21664 21850 21592 21920 21720 21947 21584 21777 21513 21753 21504 21795 21588 21879 21647 21864 21705 22029 21782 22023 16459 20493 20900 21321 21275 21421 21378 21472 21416 21461 23369 22244 21721 21687 21555 21765 21813 21704 21676 21604 21490 21623 21529 21673 21504 21744 21569 21616 21653 21568 21651 21591 21754 21543 21827 21771 21782 21720 21732 21742 21864 21861 21965 21860 21884 21768 21927 21841 21991 21778 22021 21884 21841 21649 22009 21498 21718 21578 21832 21673 21991 21673 22032 21690 22055 21751 21952 21564 21940 21467 21797 21542 21872 21581 22009 21700 22017 21800 21991 21602 21722 21461 21816 21664 22026 21691 22058 21478 22001 21556 21719 21472 22016 21666 22009 21685 21831 21553 22327 21534 21932 21678 22108 21544 21899 21449 21200 21469 21943 21671 21941 21625 21911 21562 21902 21764 22026 21604 21843 21559 21847 21460 21895 21732 21920 21619 21874 21644 21808 21668 21963 21788 21836 21568 21869 21605 22004 21775 21835 21581 21648 21547 21993 21792 21650 21537 21627 21652 22063 21789 21853 21510 21753 21730 22056 21821 21728 21455 21675 21865 21985 21767 21717 21897 21649 21782 21795 22009 21728 21686 21557 21815 21883 21905 21669 21616 21731 21932 21895 21890 22074 21716 21760 21960 21856 21943 21596 21813 21749 21941 21684 21608 20642 21634 21603 21892 21557 21667 21434 21892 21685 24796 21941 21960 21703 22088 21778 22058 21573 21808 21608 22045 21686 21949 21385 21861 21681 22147 21701 21897 21515 22034 21724 21996 21564 21973 21649 21942 21541 21755 21656 22065 21633 21892 21660 22023 21708 21953 21543 22072 21593 22044 21550 21859 21344 21911 21673 21952 21619 21752 21684 22018 21608 21873 21613 21869 21707 21869 21519 21808 21657 22003 21560 21908 21510 22003 21633 21856 21603 21748 21821 21972 21688 21801 21589 21931 21857 21906 21546 21629 21683 21909 21675 21677 21575 22016 21769 21781 21497 21653 21980 21985 21632 21698 21588 22151 21728 21706 21701 21687 21707 21814 21906 21556 21881 21753 22048 21668 21692 21720 21907 21882 21671 21618 21963 21827 21808 21556 21921 21783 21888 21725 21815 21864 22000 21673 21769 21685 21937 21622 21802 21602 21961 21760 21892 21491 22024 21756 21984 21511 21861 21688 22016 21578 21867 21624 22067 21686 21743 21575 22038 21735 21859 21404 21928 21677 22103 21616 21888 21734 22049 21627 22093 21632 21999 21591 21889 21548 22005 21671 21885 21586 21895 21579 21828 21549 21793 21659 21921 21626 21824 21628 21976 21559 21764 21587 21985 21684 21879 21537 21895 21783 21904 21519 21969 21658 21970 21600 21854 21641 22087 21664 21901 21605 21936 21793 21957 22045 21774 21838 21993 21635 21795 21596 21894 21965 21926 21715 21747 21619 21725 21550 21658 21656 22010 21980 22105 21875 21913 21616 21841 21673 21767 21625 21813 21941 21890 21879 21778 21955 21725 21978 21671 21705 21604 21705 21634 21832 21792 21895 21923 21875 21842 21952 21708 21704 21664 21812 21699 21903 21800 22089 21753 21880 21564 21597 21533 21920 21719 22086 21747 21943 21607 21712 21612 22071 21761 22031 21445 21924 21779 22021 21455 21926 21747 22001 21452 21912 21705 21985 21733 22040 21776 21704 21690 22054 21444 21960 21652 21878 21563 22007 21696 22057 21692 21969 21697 22103 21678 22036 21672 22037 21546 22023 21619 21927 21240 21929 21532 22072 21637 21809 21756 21845 21623 21899 21647 21996 21755 21842 21634 21891 21615 21876 21616 21869 21701 21939 21724 21917 21647 21888 21697 21873 21559 21713 21559 21835 21592 21782 21563 21825 21719 21879 21782 22041 21984 22075 21920 21930 21660 21821 21548 21684 21377 21548 21615 21920 21972 21921 21648 21719 21637 21600 21582 21433 21819 21831 21972 21799 21984 21632 21689 21670 21819 21904 21939 21824 21848 21597 21806 21835 21912 21808 21988 21568 21943 21714 22027 21655 21738 21776 13102 15013 16285 16972 17761 17988 18419 18427 18950 32308 24553 22738 22592 22136 21897 21762 22134 21810 21879 21751 22070 21648 21920 21724 22105 21368 4999 17057 18961 19229 20263 20150 20473 20480 20932 20625 26971 23204 22661 22000 22180 21708 22039 21698 21965 21440 22044 21636 21888 21689 21905 21512 22048 15220 19593 20389 21071 20821 21485 20993 21453 21231 21441 24240 22817 22112 22232 21746 21929 21724 21991 21475 22000 21671 21815 21699 21863 21664 21943 21643 19214 20647 21328 21335 21529 21424 21671 21394 21873 43212 23024 22248 22080 21948 21943 21619 22092 21735 21831 21869 21876 21942 21916 21528 22018 21557 21888 20793 21317 21824 21613 21532 21713 21386 22021 21558 24664 22193 22171 22144 21837 21834 22030 21762 21798 21917 21644 21985 21635 22018 21858 21735 21868 21899 21773 22004 21666 21988 21760 21783 21835 21950 21777 21981 21632 22039 21821 21930 21742 21766 21882 21875 21690 21928 21744 22025 21481 22023 21721 22016 21737 21803 21783 21693 21685 22019 21628 22048 21397 22065 21689 21933 21720 21788 21706 21953 21703 22071 21548 22060 21504 22027 21677 21979 21801 21852 21738 21973 21691 21984 21543 22104 21526 22113 21542 21993 21484 21879 21557 21819 21606 21848 21652 21872 21666 21845 21505 21915 21404 21908 21509 21852 21585 21879 21638 21893 21577 21956 21513 21885 21598 22022 21553 21909 21648 21789 21712 21837 21687 21865 21635 21935 21475 21913 21447 22009 21504 21985 21552 21889 21604 22016 21725 21830 21735 21811 21612 21856 21440 21936 21494 21972 21594 21854 21742 21633 21765 21752 21735 21726 21698 21817 21608 22006 21560 22089 21548 21893 21662 21688 21644 21809 21947 21717 21874 21781 21614 21799 21558 21939 22036 22018 22040 21660 21944 21548 21872 21661 21889 21787 21723 21815 21673 21787 21785 21760 21890 21681 21932 21589 21907 21755 21788 21801 21770 21796 21798 21744 21961 21633 21889 21580 21973 21824 21927 21678 21844 21836 21761 21761 22255 21741 21990 21615 22042 21436 22025 21684 22056 21632 21908 21760 21797 21717 22231 21632 22017 21571 22051 21548 22016 21629 22016 21624 21867 21797 21696 21816 21921 21607 22089 21404 22017 21604 22003 21480 21960 21584 21888 21725 21896 21517 22024 21537 21884 21752 21950 21640 21889 21658 21949 21340 22045 21651 21861 21527 21961 21679 21949 21450 21965 21568 21985 21660 21648 21702 21825 21435 21984 21542 21830 21705 21832 21621 21913 21616 21778 21661 21831 21516 21995 21623 22237 21620 21968 21633 21773 21498 21977 21863 21894 21645 21811 21545 22005 21796 21840 21588 21894 21543 22001 21817 21936 21611 21691 21517 21809 21907 21885 21719 21804 21583 21651 21684 21967 21939 21885 21683 21736 21645 21549 21571 21734 21888 22130 21861 21875 21977 21831 21819 21848 21654 21591 21863 21764 21938 21844 21908 21809 21879 21764 21559 21578 21753 21696 21898 21802 21948 21735 21926 21819 21934 22103 21818 21595 21777 21760 21957 21743 21972 21795 21885 21623 21785 21688 21999 21769 22000 21760 21947 21771 21735 21650 22009 21737 22056 21667 21879 21510 21856 21657 21972 21707 21933 21671 6950 14319 16375 17041 17916 18195 18554 18685 19304 19111 26096 23266 22546 21995 22365 4759 18347 19388 20322 20419 21027 20700 21115 20837 21157 26571 23542 22405 22249 21769 22197 18839 20761 20741 21372 21217 21651 21162 21601 21151 28526 23157 22428 21982 22371 21772 19148 20876 21433 21207 21687 21525 21750 21403 21769 21533 23216 22182 22098 21731 22044 18995 21380 21422 21728 21648 21721 21485 21736 21712 21875 22608 22138 21728 22121 21842 21879 21575 22038 21717 21790 21547 22043 21773 21767 21605 22033 21703 21722 21510 21953 21794 21713 21715 21963 21830 21649 21555 22027 21753 21760 21591 22073 21673 21687 21683 21801 21911 21699 21669 21764 21977 21763 21721 21799 21954 21828 21798 21803 21920 21911 21744 21824 21943 21744 21868 21715 21969 21588 21882 21817 21835 21509 21920 21824 21937 21575 21995 21760 21852 21525 21981 21721 22084 21639 22017 21725 21684 21730 21957 21641 21879 21680 22034 21496 21965 21761 21888 21621 22065 21640 21879 21625 22061 21772 21899 21798 21916 21552 21991 21799 21989 21657 22065 21571 21937 21681 21905 21533 21997 21576 21882 21645 21940 21539 
39494 34933 42656 35413 38366 35908 37409 42912 36820 34915 38139 34416 37013 33767 36843 35521 37393 33605 37312 33088 37600 34600 38388 33752 37520 34154 37388 34466 37726 35384 38452 36034 37410 34340 36474 34435 39089 33926 36743 34936 36650 35671 37152 34087 40064 33590 39533 35536 36129 35698 36724 36963 38121 35312 34480 34128 37988 35223 35873 32561 36547 37904 37590 32627 34784 35649 38856 36088 36432 36196 36507 37520 37200 34944 34999 36360 39187 35730 34351 33063 38010 36364 36025 37772 36312 38848 37962 33079 35016 38728 36499 38891 33641 36949 36594 37602 35395 35840 36912 38631 36498 35242 35425 37085 35948 33801 34496 37817 36922 36528 34260 35831 36736 42800 36464 34105 37840 34240 38400 35312 38157 36476 35980 35867 37087 35424 36512 33394 34882 33559 35029 33256 33328 42784 34080 40544 34488 42503 35283 34864 38067 37355 37338 33536 35524 34737 35513 33703 42778 34721 34552 37346 35416 37479 34964 33600 41600 34774 33866 35418 33896 36750 35913 36864 33124 34679 33796 36899 35776 38469 35431 36048 32747 34945 33920 37609 35008 38299 34506 38464 42611 36789 34480 37767 25363 33648 30640 37216 34416 34656 35412 33482 30581 41568 43273 42384 41265 42134 35998 39317 42830 37660 33433 35627 42156 35968 41216 37289 34208 36407 42359 35960 41005 37536 32999 37440 42337 36193 32536 37345 33502 35370 32973 35914 34301 38112 42451 36615 33872 36272 33604 36498 33554 35666 34052 36864 34514 36047 32980 34755 42317 38304 35808 36903 32732 33485 35361 37943 34064 35125 33079 36128 36760 35928 42580 34149 33888 38368 34258 34202 42129 34468 36097 38279 34360 34054 33500 35778 35879 36457 36918 34236 35990 34997 36759 35736 34192 33943 36416 36085 36130 42950 34842 36176 37065 35373 33913 33356 37975 35608 36848 42579 36352 36627 37248 34276 36821 33707 37376 35661 36456 41939 37370 35107 37170 33017 36574 34322 38981 43076 36582 33847 37576 35680 37840 43009 37606 35920 37947 42008 38368 34096 38960 43241 36875 34465 36038 32768 36401 33621 37063 33348 37586 34370 37504 42904 37366 41848 39119 41499 37456 33989 37632 34268 36145 33319 35926 34195 36400 33447 35509 34496 36736 33687 36945 34236 36132 42133 36176 34098 36194 33992 36439 35672 37035 33139 34971 36652 36641 32796 34248 35993 36208 42937 34194 21574 33168 31428 34234 33112 36071 37600 31632 36032 36363 44257 43220 34537 40209 36011 36369 37747 37537 36637 33328 37499 37105 36600 33377 37095 36320 33392 33712 36225 35960 33480 32945 36556 35924 36579 33452 37594 35204 34282 34884 36811 36112 36530 34098 37846 35193 37164 33536 38491 35320 35088 33089 38572 34169 35953 34130 37600 34492 35367 34373 38509 33949 36493 34421 39075 33009 35877 34440 38668 41656 37574 33780 38557 41795 38912 33498 37223 33256 38256 33257 37277 41985 38533 42312 37486 41813 39895 42836 39898 33408 37701 43109 36148 34201 37588 43206 35917 34983 36954 33968 36448 35576 35880 37177 36644 33644 36341 33383 36941 34353 36085 34076 37121 35107 35560 41841 37721 35668 37089 33587 36483 34758 35650 42080 37529 34592 35155 32848 38328 34672 34789 33920 39360 33862 37145 34352 38707 34964 34362 35290 37124 33368 34816 37879 35664 42628 33255 36534 35824 33799 35209 37672 33901 33647 35636 37344 32631 35168 36352 36128 32979 37124 36788 35584 34374 38413 35543 34358 34344 37532 34961 35801 35474 37356 33168 36928 35572 36935 42395 37757 36217 37312 32964 38257 34765 37266 32805 38809 34752 38011 33237 38705 31993 38797 33768 32027 41799 36522 34534 39264 36275 34432 40723 35730 36855 38928 33169 39324 33576 36901 33348 39236 34521 36992 33576 38185 33016 36459 41786 37815 42140 36557 41376 38424 33376 36900 41767 37378 34058 36871 33128 37121 34466 37248 35824 36801 35253 36914 32929 37010 34597 38233 42976 37357 33440 35553 32734 37376 35703 36696 34193 36416 32800 35328 35783 38416 35551 37241 34231 35110 33718 34161 33110 37413 37018 38725 35035 35650 34018 36490 32999 39687 42994 34426 34071 35392 35880 35067 35169 35863 36428 36550 38216 35258 38257 35733 36219 36663 33808 34222 33531 42656 35290 42155 35451 42141 36041 34242 36205 34086 36507 36337 38656 36544 38309 34664 37644 34263 35506 33002 37013 35056 37828 35441 38453 33365 36096 33362 38833 34949 38609 43018 37381 33888 39325 35697 37344 42306 39169 34449 38208 35320 37536 42268 38287 34624 39752 34840 38454 42856 37715 42855 36802 34081 38390 33320 35684 34377 37072 42709 39216 43008 35961 42970 37713 34081 37618 35024 38342 33360 35186 33411 37639 34583 36740 33856 37257 35369 37955 33699 35705 32858 35733 32512 35965 33760 37171 34721 36833 35271 38719 36086 38650 30016 31708 36308 41064 40871 42448 41776 42752 42291 42852 43020 41333 35681 35096 33419 35616 36337 35116 34800 33924 42651 34735 33053 34678 32468 35349 33458 33904 34461 33297 34391 33892 35748 33330 36392 35920 35959 35312 35433 35744 36893 36989 38241 36943 37304 35751 37712 36676 38534 35924 38540 37360 36683 34433 38561 43110 35707 33687 36391 34838 38451 34941 38437 35149 39020 36041 37730 33657 37600 42775 36480 33269 36774 33897 38556 35169 38352 36212 38520 34042 35360 42488 36613 34539 38523 35276 38964 42864 38743 33506 35399 42412 38567 34736 38596 35115 36617 33347 41704 33536 37589 35049 39559 33376 37254 42455 40112 42960 38235 34997 37772 34453 37456 33607 37301 35697 38571 34092 36616 33625 36746 42458 37602 35549 37332 34344 36928 34468 36034 34656 38082 36160 36640 33416 37029 34135 38390 36184 36717 33907 34203 33318 38311 36016 34400 33004 34329 34352 39180 36322 36969 32853 35672 35410 38853 36725 35346 42624 35244 36978 38278 35975 35365 37197 34456 35888 36112 38650 35444 34966 33415 36368 37328 37328 34820 33984 35429 37683 37385 37120 39168 35410 35456 37909 36781 37969 34087 36290 35803 37815 34963 34007 33512 34056 33938 37000 33521 34610 42152 37367 35059 37094 37861 38021 35367 39232 35952 38999 33796 36017 34026 38864 35112 37993 41778 37216 34893 39889 35346 37221 33037 38445 35578 38467 33712 38087 34500 37752 33329 35855 34497 38931 34336 37020 34700 38584 35384 37809 33463 38952 34075 38750 33605 36789 41209 37752 34908 37674 34349 35680 34853 38327 34147 36931 34339 37078 35381 37124 33191 35989 34620 38484 33544 37184 32855 38401 34307 36618 34077 35584 36565 38096 35040 36176 33880 37671 36896 37301 33376 34392 34868 37360 35001 34924 33712 38154 35909 35958 42956 34889 38240 38336 34200 34917 33700 39959 35511 35192 35105 35048 35278 36338 37275 33420 37106 35893 38679 34775 35045 35264 37339 37264 34944 34091 38065 36592 36148 33365 37351 36128 36950 35605 36478 36915 38376 34928 35749 34967 37632 34375 36144 33931 37949 35570 37082 42925 38795 36018 38134 33024 36821 34976 38232 33808 37024 34295 39043 35117 35882 33751 38637 35808 36906 41936 37824 35061 39587 34208 36870 35616 38784 34611 39433 34245 38624 34111 36972 33393 38472 34997 37322 33783 37217 33882 36332 33484 35901 34723 37414 34421 36226 34412 38064 33697 35522 33801 38138 34976 37227 33157 37184 36125 37165 33195 37901 34706 37967 33920 36849 34441 39357 34668 37349 34140 37472 36096 37991 38967 36086 36756 38476 34425 36041 33973 37104 38240 37709 35425 35730 34253 35489 33437 34480 34427 38555 38403 39687 37303 37527 34119 36513 34857 35804 34359 36295 37833 37132 37329 35856 37949 35671 38233 34978 35175 33920 35139 34135 36413 35921 37320 37636 37205 36649 37760 35333 35073 34448 36192 35127 37483 36165 39392 36002 37120 33624 33986 33152 37220 35538 39289 35899 37930 34287 35050 34130 39180 35747 38850 42476 37784 36009 38548 42784 37898 35849 38448 42548 37661 35297 38209 35652 38672 35824 35098 34992 38899 42368 38215 34560 37095 33697 38597 35016 38928 35235 38011 35105 39574 35146 38598 34843 38667 33441 38549 34384 37650 40402 37871 33229 38965 34485 36156 35872 36749 34459 37303 34729 38418 36072 36612 34208 37085 34464 36980 34093 37064 35208 37745 35554 37596 34741 36884 35050 36971 33632 35105 33536 36585 33843 35849 33639 36274 35497 37240 36015 38793 38257 39424 37532 37730 34747 36525 33367 34738 41418 33622 34304 37264 38138 37561 34380 35402 34323 33728 33750 42112 36819 36699 38112 36368 38160 34173 34965 34699 36485 37169 37843 36361 36720 34120 36288 36714 37399 36180 38272 33491 37818 35299 38678 34800 35584 35537 35860 35944 39556 35666 33884 36192 40899 41377 36504 46215 45867 36303 34037 39763 37476 35658 39904 36384 37294 35963 39152 34440 37292 35527 39552 41748 31224 36123 36332 39379 40591 39473 42823 31895 36694 33440 40093 41075 35221 38298 40357 35456 38854 35140 38152 42184 39126 34387 36868 35084 37217 32807 38531 38129 33210 41519 38912 35904 42912 37735 42636 40779 42439 42228 36916 39504 41029 35879 37658 35554 38473 42828 38637 35015 36444 35154 37021 34554 37868 34596 39072 34048 40832 41563 33373 41787 35146 41600 37264 40420 39120 41216 39264 38065 38023 34358 39333 35855 36647 37195 37072 37866 37589 33056 38249 33595 36829 35483 40992 36520 34332 33046 35079 41624 38792 33628 35351 40389 40486 39914 36920 36640 38768 35755 36151 37636 34517 38180 34407 38317 36924 35741 37025 37417 36016 38487 34727 38222 35586 36053 36699 38022 35904 38387 34192 38784 36668 37699 35859 35748 37195 37168 35095 37520 35594 38580 42906 38966 35575 38261 35725 36321 36082 35237 34945 38450 34520 38616 41952 39279 35201 37793 35394 36043 35212 37796 35344 39234 33511 38920 32693 38550 35093 38321 36331 36869 35675 38157 35259 38107 33476 39344 33200 39434 33413 38329 42925 37584 33553 36437 34102 36608 34474 36827 34658 36680 32681 37432 41960 37568 32896 36696 33760 37164 34394 37136 33763 37767 32944 37235 34139 38448 33433 37288 34359 36084 35116 36689 35136 36967 34353 37851 42777 37773 42553 38944 32693 38087 33320 36944 34024 38153 35688 36512 35720 36313 34202 36608 42116 37830 43012 38388 34057 36864 35831 34178 35675 35712 35683 35559 34981 36384 34048 38489 33548 39256 33520 37088 34836 34861 34384 36161 38000 35461 36993 36002 34294 36192 33479 37660 38613 38499 38816 34788 37714 33420 36793 34803 37012 36177 35553 36458 34861 36068 36024 35481 37031 34890 37664 33961 37282 36006 36064 36213 35812 36038 36164 35536 38021 34285 36984 33787 38088 36352 37735 35059 36597 36664 35645 35584 41340 36031 38400 34524 38728 42418 38888 34988 38848 34202 37220 35544 36145 35376 40945 34315 38315 33722 38799 33479 38164 34616 38217 34346 37047 36208 34918 36284 37476 34272 39289 42058 38664 34103 38467 42789 38230 33717 36849 35628 37124 33080 38348 33207 37135 35793 38006 34386 36991 34663 37968 41429 39204 34683 36896 33191 37910 35179 37992 42496 38464 33512 38129 34768 34265 35079 36314 42388 38409 33382 36416 35244 36448 34338 37392 34106 35719 34764 36594 32943 38406 34544 40992 34435 37864 34282 35877 42956 38546 37194 37255 34617 36257 33321 38460 36171 36501 33792 37057 33415 38320 36544 37584 34344 35069 32964 36074 37380 37434 35561 36227 33985 34431 34795 38232 37890 37457 35026 35476 34529 33424 33488 35447 36920 39795 37134 37177 38304 36759 36584 36705 34597 33912 36971 35671 37666 36709 37340 36289 37288 35686 33624 33568 35740 34880 37208 36262 37929 35781 37608 36612 37847 39624 36585 34069 35726 35473 37968 35991 38080 36242 37384 34476 35953 34916 38656 35929 38332 35601 37970 35968 35699 34381 38576 35751 38885 34866 37221 32850 36560 34640 38017 35424 37792 34957 31527 38692 40697 36338 35792 38417 32201 33537 39912 38518 40969 41827 33820 38450 42507 28796 39840 41176 41189 42240 38218 34598 39049 36096 39399 46311 45094 43049 41504 36064 40425 35575 35014 34710 41600 40261 34726 39388 34096 39444 47016 41070 43128 38723 42404 36137 38540 36433 42262 40374 35305 33003 35648 41939 36063 33292 40791 40587 39553 35716 38821 36968 41536 42487 35617 34288 35343 42885 35829 35111 37087 34261 39877 35516 39744 36773 37301 33835 38630 35505 36140 33424 38787 36080 35864 34080 38500 35392 35399 32789 37681 36100 35223 35289 38104 36651 34433 33360 38574 35977 35486 33972 39106 34976 35058 34904 36154 37536 35194 34736 35569 38225 35815 35424 36232 37814 36496 36192 36332 37368 37563 35611 36263 37964 35594 37031 35380 38021 33852 37120 36481 36736 32847 37223 36336 37696 33842 38441 35593 36836 33073 38264 35531 39150 34601 38325 35689 34871 35368 37955 34485 37212 34775 38541 42968 38499 35715 36936 34351 38928 34420 37207 34425 39081 35954 37376 36224 37523 33287 38376 36386 38384 34730 38944 33748 37577 34912 37216 33307 38464 33712 37109 34598 37643 33290 
21139 21513 21238 21636 21154 21383 21133 21555 21160 21590 21003 21395 21208 21684 21081 21606 21029 21368 21134 21551 21155 21420 20994 21649 21245 21505 21079 21245 21061 21461 21179 21475 21106 21571 21345 21403 21184 21352 21168 21559 21215 21423 20995 21432 21149 21333 21205 21284 21110 21687 21207 21368 21265 21333 21433 21462 21139 21209 21108 21570 21152 21254 21099 21447 21424 21310 21079 21306 21207 21572 21343 21203 21309 21508 21475 21373 21143 21196 21371 21454 21287 21507 21159 21529 21273 21222 21015 21479 21446 21225 21379 21200 21417 21320 21359 21095 21590 21335 21476 20904 21384 21231 21495 21065 21299 21303 21592 21213 21320 21221 21487 21376 21426 21189 21569 21303 21413 20951 21537 21230 21529 20939 21446 21307 21516 20992 21339 21335 21543 21138 21392 21143 21515 21146 21344 21191 21655 21146 21392 21180 21632 21165 21356 21152 21486 21068 21297 21159 21605 20939 21201 20921 20599 20720 21069 20935 21064 20992 21193 21061 21082 20907 20969 20852 21184 20903 21265 20936 21065 20617 21019 20816 21234 20880 21274 20803 20915 20667 21120 20875 21315 20914 21267 57 4922 7105 8937 9401 10496 10472 11055 11105 11887 33051 28473 26248 25479 24291 24233 23516 23773 22947 23216 22528 22887 22428 22623 22117 22343 22030 22231 21898 22162 21724 21991 21541 22071 21640 21993 21464 21825 21396 21813 21489 21747 21411 21719 21467 21775 21432 21585 21360 21574 21442 21698 21292 21519 21107 21486 21321 21458 21251 21088 21139 21560 21300 21376 21179 21200 21409 21600 21200 21249 21007 21527 21560 21358 21132 21163 21188 21519 21409 21310 21200 21144 21340 21474 21181 21317 21271 21159 21510 21189 21367 20994 21326 21239 21448 21206 21364 21175 21408 21285 21376 20965 21354 21229 21478 21086 21282 21111 21504 21181 21303 20919 21300 21160 21559 20962 21286 21079 21520 21115 21411 20999 21525 21098 21497 20777 21448 21058 21529 20957 21305 21043 21479 21013 21325 21005 21494 21111 21500 20933 21520 20918 21317 20854 21375 21027 21347 20993 21399 21053 21338 20932 21320 21046 21351 20956 21280 20966 21355 21023 21272 21008 21459 20992 21196 21010 21396 20949 21200 20929 21401 21015 21216 20866 21365 21060 21252 20933 21401 21113 21184 20951 21360 21120 21088 20899 21362 21103 21189 20902 21376 21051 2958 7391 9530 10168 10922 11453 12113 12183 12355 11951 29696 26787 25521 24641 24528 23808 23414 23189 22932 23104 22536 22538 22336 22592 22200 22162 22096 22197 21872 21985 21865 21989 21609 21820 21649 21985 21526 21625 21590 21825 21345 21573 21399 21881 21286 21625 21372 21727 21205 21489 21363 21645 21013 21509 21242 21681 20969 21533 21116 21632 20819 21569 21191 21483 20960 21476 21211 21408 20945 21429 21215 21925 20956 21536 20965 21489 20984 21379 20955 21200 21060 21207 20996 21229 21089 21390 20820 21272 20971 21328 20884 21339 20901 21355 20886 21283 20902 21218 20912 21377 20989 21190 20860 21307 20953 20781 20927 21262 20944 20985 20999 21267 20935 21210 20924 21275 21004 21195 20982 21259 21010 21077 21065 21332 20931 20905 21097 21232 20999 20995 21213 21115 20890 21000 21337 21152 20849 21053 21298 21134 20865 21117 21134 21015 20894 21094 21184 21067 21060 20984 21367 20736 21117 21071 21191 20889 21299 21188 21111 20984 21235 20996 21027 21082 21367 21034 21191 20940 21208 20830 21336 20999 21134 20829 21352 20998 21025 20829 21260 20928 21173 20905 21334 20872 21056 20877 21380 20840 21169 20886 21380 0 10093 11550 12867 12749 13895 14006 14798 14599 15069 28705 26150 24388 24014 23217 23265 22485 22743 22327 22531 22038 22251 21995 22088 21590 21849 21541 21906 21351 21721 21405 21788 21286 21691 21451 21683 21278 22038 21279 21598 21273 21529 21176 21579 21186 21347 20995 21472 21192 21378 21089 21489 21018 21451 21122 21403 21120 21216 21120 21219 21140 21461 21142 21196 21025 21149 20885 21162 21052 21438 21316 21301 21093 21185 20912 20892 21013 20978 21107 21309 21263 21383 21253 21264 21143 21174 21305 21149 21340 20939 21265 20873 21109 20850 21172 20929 21289 21006 21280 21079 21340 21129 21249 21120 21271 21036 21312 20836 21106 20847 21113 20925 21236 20985 21337 20948 21384 21029 21316 20853 21084 21016 21192 21003 21386 20872 21130 20732 21355 20937 21415 20812 21196 20589 21339 20963 21283 20883 21178 20816 21341 21001 21410 20745 21050 20757 21335 20764 21335 20935 21147 20736 21220 20917 21221 20924 21244 20643 21175 20697 21257 20807 21223 20611 21197 20746 21143 20818 21230 20960 21199 20751 20979 20864 21164 20855 21130 20797 21200 20979 21252 20955 21248 20916 21140 20913 20696 20887 21112 20871 21053 20963 12800 14359 15312 15669 16311 16353 16762 16914 17143 40024 24928 23833 23339 22938 22799 22466 22404 22170 22212 21989 22042 21929 21943 21829 21840 21591 21705 21533 21403 21597 21364 21626 21305 21664 21361 21575 21354 21560 21370 21485 21323 21393 21243 21477 21175 21332 21021 21621 20982 21273 20847 21249 20995 21351 21072 21465 21025 21487 21093 21460 21111 21396 20940 21735 20769 21244 20893 21351 20980 21428 20999 21490 21069 21476 20937 21334 20960 21124 20851 21321 21031 21420 20992 21444 21024 21376 20897 21163 20778 21450 20993 21287 20815 21245 20760 21394 20884 21276 20920 21285 20839 21281 20837 21393 20766 21309 20897 21240 20773 21153 20888 21179 20928 21266 20887 21113 20812 21143 20828 21187 21007 21295 20935 21256 20830 21093 20897 21282 20918 21151 20960 21135 20775 21149 21057 21189 20909 21017 20784 21089 21148 21224 21015 21020 20800 21235 21232 21161 20900 21015 20796 21156 21264 21054 20935 21439 20822 21292 21133 21059 20928 20877 21042 20951 21147 21132 21239 20726 21097 20949 21324 21048 21104 20834 21169 21131 21299 21026 21107 20855 21197 20960 21349 20889 21106 20827 21287 21100 21389 21015 21147 13975 17828 17919 18531 18240 19019 18792 19289 18993 19403 23029 22615 21945 22224 21590 21887 21244 21878 21368 21832 21220 21416 21150 21653 21213 21440 20896 21379 21184 21565 21057 21409 20940 21487 20874 21364 20961 21367 20983 21305 20858 21162 21041 21383 20873 21239 20684 21309 20997 21332 20820 21268 20862 21402 20950 21269 20709 21267 21035 21241 20836 21263 20919 21228 20868 21157 20820 21269 21002 21240 20848 21145 20919 21322 20948 21181 20828 21304 21111 21101 20896 20992 21023 21290 20971 21030 20780 21157 21107 21123 20887 20943 21272 21250 21009 21056 20928 21238 21080 21053 20913 21001 21165 21176 20849 20909 21047 21261 21288 21012 21022 20960 21285 21153 21212 20759 21231 20997 21344 21352 21003 21084 21292 20908 21037 21014 21274 20957 21176 20914 21241 21009 21147 20673 21146 21031 21272 20968 21216 20976 21443 20883 21125 20930 21318 20942 21040 20797 21336 20995 21288 20708 21324 20932 21431 20767 21261 20926 21327 20802 21076 20867 21318 21015 21226 20637 21285 20849 21388 20831 21203 20808 21243 20772 21173 20941 21229 20825 21090 20869 21318 20806 21223 20672 21306 20804 21257 20722 21246 20847 21165 20769 21165 20989 21172 20855 20921 20811 21331 20845 21126 20679 21311 20911 21180 20865 21155 20917 21181 20902 21097 20852 21281 20985 20989 20815 21269 21083 21089 20869 21055 21149 21185 20975 21104 20861 20981 20776 21068 21139 21320 21137 21172 21012 21049 20845 20950 20935 20948 20736 20865 20839 21027 20901 20988 20995 20905 21264 21057 21326 20941 21277 21076 21191 21003 21175 20822 21031 20899 20954 21036 21164 21081 21272 21003 21248 20864 21091 20907 20676 20898 21333 21025 21272 20998 21227 20828 21091 20905 21262 21025 21298 20982 21137 20912 21330 20925 21305 20727 21237 20963 21418 20743 21259 21041 21321 20662 21297 20952 21215 21313 21387 20909 21145 20952 21401 20801 21237 20882 21252 20736 21239 20920 21230 20904 21288 20848 21369 20826 21197 20840 21237 20698 21248 20775 21353 20684 21184 20709 21189 20951 21218 20845 21061 20781 21166 20910 21121 20942 21237 20855 21108 20759 21290 20851 21051 20805 21099 20916 21174 21017 21188 20992 21208 21037 21272 20995 21251 21006 21240 20963 21076 21001 21183 21038 21025 20909 21014 20903 21217 20827 21073 21075 21290 21227 21184 21010 21022 20914 20918 20860 21017 21184 21112 21133 21117 21298 20872 21115 20810 21192 21089 21199 21093 21159 21079 21056 21012 21224 21180 21184 20978 21172 20909 21363 20948 21276 20773 21351 21063 52 1870 5086 6256 7586 7556 8652 9010 9783 9633 32680 28984 27572 26073 25552 24797 24776 23914 23927 23443 23607 22880 23235 22724 22971 22295 22848 4967 9301 10503 11903 11987 12868 13000 13588 13377 14189 29425 27505 26049 25641 24473 24672 23827 24003 23311 23557 22953 23228 22672 22867 22497 22808 22210 11190 12807 14109 14357 15275 14649 16027 15761 16128 34550 27274 25472 25004 24065 23984 23630 23580 23001 23175 22704 22918 22482 22471 22387 22487 21977 22428 14919 16398 16652 17335 17383 17796 17629 18213 17957 27510 24823 24024 23673 23419 22901 23061 22599 22669 22389 22349 22440 22311 22120 22223 21911 22359 15714 18547 19121 19309 19560 19609 19561 19977 19665 20089 23762 22872 22814 22366 22481 22289 22080 22092 22128 21899 22208 21616 22016 21744 21842 21746 21184 21732 21879 21479 21800 21030 21719 21590 21552 21591 21780 21455 21801 21267 21714 21326 21691 21505 21410 21392 21650 21383 21657 21197 21734 21101 21655 21275 21605 21393 21365 21367 21644 21219 21651 21063 21664 21137 21600 21251 21576 21299 21461 21198 21595 21134 21665 20979 21673 21217 21585 21193 21364 21288 21314 21249 21543 21171 21668 20995 21607 20793 21561 20973 21607 21084 21447 21130 21472 21232 21402 21186 21372 20930 21505 20998 21627 21072 21493 21101 21625 21124 21424 21092 21371 21030 21465 21035 21425 21041 21607 21044 21344 21139 21391 21249 21304 21201 21350 21146 21392 21019 21422 21095 21457 21044 21350 21097 21289 21170 20690 21218 21228 21095 21306 20855 21442 21090 21450 21109 21348 21088 21186 21127 21217 21315 21231 21348 21272 20981 21335 21126 21433 20964 21387 21030 21208 21088 21125 21262 21127 21418 21178 21248 21254 21004 21254 20983 21393 21197 21120 21366 21047 21405 21196 21435 21056 21399 21185 21198 21196 21336 21130 21305 21139 21415 20877 21435 21084 21397 21165 21236 21099 21417 21089 21436 20985 21430 20964 21440 20882 21436 21045 21401 21112 21321 21132 21304 21129 21333 21083 21373 20988 21447 20848 21477 20967 21418 21061 21245 21138 21275 21088 21422 20933 21522 20817 21495 20871 21456 21017 21353 21110 21254 21045 20618 21013 21464 20907 21436 20985 21444 20813 21420 20958 21213 21002 21313 20964 21280 20775 21352 20951 21201 20943 21230 21046 21333 20827 21389 20929 21330 20836 21481 20999 21295 20912 21274 20838 21360 20984 21196 21096 21160 20956 21255 20931 21363 21002 21297 21108 21240 21114 21321 21044 20588 21040 21248 20932 21230 21015 21315 20886 21167 21027 21363 21120 21236 20916 21224 21175 21345 21093 21109 20839 21231 21223 21239 21068 21144 20999 21143 21331 21350 21068 21088 20983 21057 21101 21443 21325 21180 21068 21130 21010 20992 21003 21251 21319 21427 21050 21103 21044 20983 21085 21045 21081 21014 21258 21096 21385 21137 21348 21079 21240 20963 21077 21110 21141 21133 21248 21227 21360 21257 21303 20979 21276 20796 21191 20954 21353 21022 21394 21165 21405 21065 21025 20824 21234 21024 21379 21036 21429 21037 21284 20951 21195 20918 21332 20999 21408 21056 21321 20792 21239 20957 21373 21030 21372 20852 21117 20853 21405 54 4131 5598 7128 7607 8765 8916 9761 9657 43732 30310 28364 26507 26129 24892 7117 10163 12119 12350 13208 13175 13945 13835 14508 14150 30774 27972 26929 25850 25501 7303 14157 14791 15783 15837 16589 16316 16896 16712 17214 29575 27232 25789 25529 24696 24589 16649 17748 18063 18651 18391 18766 18564 19047 18837 28892 25536 24822 24273 24154 23532 19620 19979 20541 20378 20613 20256 20754 20543 20678 20977 24122 23572 23312 22832 22797 22846 22823 22453 22392 22378 22495 22128 22215 22393 22327 22048 22171 22071 22304 21901 21877 21943 22117 21877 21863 21856 22016 21663 21688 21911 21880 21639 21655 21839 21769 21953 21556 21796 21641 21736 21345 21785 21674 21690 21367 21817 21653 21660 21389 21729 21585 21648 21489 21687 21576 21674 21381 21792 21462 21480 21332 21760 21477 21388 21394 21632 21455 21501 21358 21752 21396 21555 21392 21772 21102 21569 21350 21738 21179 21680 21380 21543 21227 21725 21287 21541 21257 21745 21178 21562 21255 21707 20981 21752 21287 21435 21207 21674 21221 21504 21292 21596 21063 21603 21257 21803 21089 21733 21090 21557 21148 21504 21104 21577 
21787 22274 21707 22095 21896 21639 22134 21936 22282 21687 22085 21659 22278 22020 22105 21592 21925 21904 22229 22001 22004 21639 22099 21954 22340 21723 21867 21755 22392 21866 22056 21560 22159 21946 22265 21792 21895 21782 22267 21868 22151 21589 22131 21783 22380 21675 22001 21669 22356 21888 22177 21657 22182 21913 22310 21687 22004 21637 22324 21812 22173 21513 22172 21737 22356 21688 22146 21733 22243 21863 22055 21645 22175 21811 22327 21623 22096 21803 22280 21587 22042 21593 22379 21511 22016 21577 22195 21751 22120 21670 22197 21693 22029 21623 22075 21726 22001 21541 22120 21767 22125 21511 22144 21565 22215 21653 22055 21536 22272 21648 22069 21775 22200 21859 22120 21751 22088 21866 22074 21593 22087 21817 22058 21624 22073 21775 22227 21715 21637 21819 22177 21655 22016 21761 22156 21767 21975 21540 22260 21869 22055 21662 22382 21858 21986 21622 22264 21820 21897 21686 22371 21569 21893 21719 22387 21683 21943 21748 22385 21736 21910 21830 22298 21767 21192 21892 22095 21714 21920 22220 22024 21768 21795 22195 21884 21779 21843 22084 21904 21779 22132 21857 21804 21723 22272 22224 14483 14814 15566 15351 15816 16087 16160 27521 25916 24378 24338 23846 23801 23181 22858 22471 22514 22475 22810 22112 22059 22523 21876 22186 22022 22297 21894 22043 21556 21992 21865 22160 21735 21239 21495 21954 21721 22152 21405 21692 21498 22155 21717 21892 21316 21607 21593 22070 21634 21856 21225 21832 21598 22109 21412 21709 21329 21997 21602 22037 21289 21738 21376 22103 21585 21796 21312 21898 21559 22017 21319 21879 21423 21946 21411 22071 21271 21851 21349 21984 21300 21729 21277 21859 21481 21839 21199 21869 21383 21899 21361 21885 21360 21907 21424 21650 21355 21681 21542 21801 21413 21719 21352 21880 21563 21746 21336 21665 21474 21837 21419 21888 21374 21828 21435 21687 21237 21688 21662 21751 21409 21483 21731 21793 21360 21728 21386 21949 21395 21517 21285 21845 21709 21620 21554 21671 21939 21607 21373 21580 21817 21874 21613 21264 21684 21635 21916 21393 21608 21517 21935 21624 21448 21416 21900 21665 21732 21332 21786 21627 21850 21366 21863 21644 21744 21308 21888 21587 21824 21211 21912 21592 21776 21236 21777 21571 21873 21186 21938 21530 21830 21224 21829 21584 21909 21120 21931 21713 22122 20571 21445 21254 21684 21176 22104 21715 22261 21531 22425 21559 22168 21589 22290 21564 22109 21597 22215 21817 22088 21542 22299 21764 22027 21626 22313 21632 22128 21645 22043 21617 22058 21690 22170 21686 21992 21725 22156 21794 22072 21756 22145 21717 22044 21891 22219 21717 21992 21589 22065 21908 22093 21754 22250 21792 21893 22080 22109 21861 21929 22103 21661 21715 21834 22248 21897 21736 21846 22172 21800 21768 22060 22129 21988 21710 22181 22045 21785 21844 22146 22081 21882 21863 21735 22375 21679 21861 21820 22261 21760 21835 22084 22199 21767 21986 22009 22173 21520 22249 21904 22105 21585 22119 22073 22049 21668 22293 21884 22140 21561 22400 21858 21959 21653 22305 21786 22223 21728 22349 21857 22302 21688 22368 21771 22110 21607 22357 21648 22114 21774 22281 21664 21963 21849 22337 21545 22096 21789 22451 21553 22295 21626 22048 21623 22160 21677 22081 21655 22157 21628 22388 21604 22140 21557 22161 21802 22159 21608 22202 21652 22012 21696 22216 21782 22150 21856 22167 21750 21972 21851 22103 21710 22060 21903 22041 21696 22185 21842 21991 21632 22139 21841 21989 21707 22325 21728 21912 21697 22151 21751 21924 21834 22384 21690 21984 21959 22310 21704 21831 21781 22329 21770 21942 21674 22310 21847 21884 21722 22230 21760 21971 21851 21815 22202 21816 21871 21754 22391 21761 22036 21800 22163 21898 21879 21841 22187 21927 22064 21729 22264 21907 22023 21607 22201 21950 22089 21510 22183 21920 22391 21607 21996 21679 22231 21807 22258 21613 21990 21467 22183 21701 22421 21843 22293 21587 22292 21489 22220 21731 22361 21844 22304 21792 22016 21433 22129 21600 22196 21722 22434 21687 22181 21568 22041 21554 22064 21660 22092 21920 21981 21632 22151 21591 22343 21820 22208 21604 22246 21584 22086 21663 22056 21682 22031 21796 22069 21742 22055 21822 22200 21942 22063 21748 21982 21785 22007 21603 22001 21760 22217 21996 22084 21636 22096 21860 21934 22016 22339 21754 21741 21674 21868 22040 22232 21705 22046 21868 21805 22151 22208 21816 21818 21880 21788 22256 22071 21664 21822 21853 21960 22324 22132 21844 21784 22324 21944 22275 21849 21979 21681 22103 21967 22266 21997 22007 21679 21872 21800 22165 22013 22278 21965 22066 21711 21925 21774 22112 21713 22339 21790 22323 21888 22392 21845 22368 21740 22144 21420 22070 21591 22275 21329 22192 21521 22209 21588 22279 21657 22347 21673 22326 21805 22345 21913 22294 21916 22305 21881 22345 21917 22346 21838 22314 21568 22215 21597 22240 21671 22195 21609 22223 21752 22219 21696 22209 21607 22106 21693 22135 21591 22165 21628 22132 21655 22292 21735 22336 21674 22023 21637 22018 21696 22160 21843 22173 21747 22048 21663 22157 21761 22023 21699 21972 21689 22071 21489 22007 21905 22148 22058 22150 21892 21909 21846 22003 21822 21975 21734 21783 21881 22165 22277 22114 21629 21845 21841 21889 21807 22010 21888 22296 22293 22178 21804 21829 21733 21184 21833 21598 22168 21991 22290 21939 22126 21686 21899 21720 22075 22027 22295 21921 22016 21769 21951 21803 22272 21844 22212 21646 22194 21614 22091 21765 22384 21924 22107 21656 21967 21738 22256 21897 22249 21741 22115 21540 22189 21832 22376 21741 21959 21480 22346 21815 22475 21585 22169 21504 22344 21894 22313 21679 22443 21595 22338 21836 22323 21555 22173 21652 22261 21588 22144 21680 22173 21786 22191 21824 22187 21715 22165 21682 22315 21732 22179 21690 22113 21764 22128 21622 22111 21665 22248 21898 22075 21589 22033 21753 22217 21728 21969 21682 21937 21813 22180 21764 22026 21226 22012 21864 22145 21767 21936 21685 22011 22139 22119 21719 21931 21633 22144 22125 21888 21971 21991 21648 22183 21952 21857 21711 21888 22176 22305 21570 21879 21766 22274 22149 21748 21861 21831 22031 22072 21688 21897 21667 21771 22208 21926 22032 21440 22213 21949 22241 21824 21977 21776 22224 22000 21993 21672 22164 21936 22255 21631 22032 21793 22375 21934 22053 21458 22101 21943 22300 21627 21973 21760 22432 21720 22101 21511 22216 21808 22240 20992 22056 21731 22479 21754 22237 21437 22261 21812 22405 21610 21993 21776 22327 21847 22138 21669 22364 21858 22231 21450 22089 21611 22120 21544 22080 21741 22218 21689 22034 21674 22057 21639 22037 21472 22004 21711 22202 21696 22323 21646 22152 21648 22144 21625 22148 21733 22004 21620 22128 21737 22097 21578 22100 21835 22043 21724 22012 21796 22179 21735 22107 21606 22198 21697 22001 21819 22055 21943 22056 21750 21804 22177 21860 21908 21846 21909 22120 21794 21954 21649 22253 21736 21908 22176 21854 22369 21933 21976 22131 21956 22285 21850 21729 21760 22332 21849 21970 22058 21720 22235 21984 22119 21671 22115 22064 22116 21908 21916 22021 22201 21681 21957 21859 22191 21858 22039 21762 22161 21867 22140 21652 22160 22016 22267 21620 21917 21734 22299 21686 21953 21721 22338 21767 22128 21610 22279 21770 22211 21749 22164 21765 22432 21782 22211 21659 21985 21632 22274 21860 22308 21907 22336 21734 22177 21710 22103 21553 22156 21613 22172 21760 22196 21621 22165 21752 22091 21680 22202 21623 22048 21568 22069 21588 22162 21605 22338 21667 22272 21737 22098 21655 21880 21696 22051 21681 22047 21800 22089 21856 22039 21657 22052 21782 22032 21772 22149 21817 22148 21669 22244 21728 22040 21798 22395 21671 21721 21729 22111 22148 21861 21888 21953 22054 21744 21783 21974 21898 21217 21784 22429 21723 21835 22052 21804 21733 22195 21784 21879 21699 22212 21629 21698 22052 21515 22215 21991 22291 21591 22036 22027 22288 21847 21785 21821 22240 21965 22006 21685 22043 21808 22261 22068 22162 21620 21932 21751 22080 21914 22300 21833 22305 21815 22096 21559 21860 21461 22129 21011 22125 21615 22237 21773 22325 21868 22274 21832 22365 21852 22263 21701 22298 21694 22163 21628 22135 21620 22019 21548 22025 21640 22195 21778 22404 21745 22415 21492 22166 21628 22171 21656 22176 21824 22148 21773 22016 21681 22079 21507 22275 21668 22228 21615 22134 21637 22199 21746 22265 21676 22229 21687 21920 21893 22184 21663 22023 21871 22087 21742 22037 21764 22136 21858 22022 21768 22523 21741 22124 21636 22049 21578 22134 21824 21954 21586 22342 21795 21975 21680 22133 21857 21940 22024 21910 21861 21897 22225 21856 21837 22225 21656 21813 21836 22214 21776 21939 22197 21831 21712 22289 21740 21753 21781 21912 21769 21880 22255 21975 21912 21953 22230 21596 22393 21804 22009 22006 22067 21682 22093 21703 22027 21993 21964 21792 22192 21924 22083 21995 21900 21783 22320 21824 22225 21877 21908 21866 22153 21624 22343 21687 22195 21941 22068 21897 22105 21664 22307 21505 22266 21795 22080 21915 22118 21702 22336 21533 22288 21779 22104 21769 22211 21685 22328 21537 22306 21633 22039 21808 21911 21776 22306 21612 22364 21731 22269 21668 22141 21639 21779 21714 22208 21684 22149 21777 22187 21678 22082 21607 22020 21763 22217 21693 22231 21543 22173 21648 22283 21796 22114 21667 21997 21703 22219 21744 22151 21811 22109 21904 22096 21741 22162 22151 22193 21815 22178 21750 22147 21739 22016 21782 22049 21755 22021 21639 22121 21740 21906 21901 21744 22061 22129 21760 21857 21737 22210 21891 22055 21735 21728 21750 21960 22175 21978 21920 21748 21847 22240 21716 22283 21793 21929 21909 21943 22279 21893 22061 21797 21902 21831 22060 22295 21773 22092 22243 21593 22226 22101 22254 21885 21972 21955 22175 21943 22102 21828 22186 21677 22192 21600 22110 21751 22136 21916 21888 21891 22318 21898 22080 21742 22337 21637 22326 21592 22274 21673 22198 21880 22104 21941 21935 21829 22052 21753 22285 21639 22439 21626 22327 21637 22204 21784 22093 21879 22007 21815 22055 21760 22292 21576 22432 21604 22288 21567 22371 21661 22220 21808 22001 21845 22155 21815 22093 21770 22260 21608 22272 21629 22218 20839 22211 21540 22240 21699 22197 21700 21906 21763 22041 21833 22176 21553 22200 21813 22287 21510 22084 21640 22099 21633 22191 21751 22080 21703 22141 21779 22205 21680 22181 21753 21991 21607 22221 21868 22031 21845 22073 21835 22096 21667 21988 21751 22261 21722 22135 21834 21916 21834 21976 21913 21854 21649 21880 21799 22181 21855 22173 21861 21837 21920 21864 22264 21965 22016 21872 21742 21815 21867 22230 21648 22016 21713 21803 22129 21884 22091 21808 21701 21955 21779 22433 21804 21787 22091 21801 21955 22237 22293 21897 22197 21532 22243 21638 22120 22005 21933 22001 22111 21831 22208 21691 22122 21814 22034 22005 21898 21884 22127 21617 22314 21669 21959 21879 22071 21651 22185 21751 22083 21954 22097 21675 22368 21685 21959 21800 22295 21632 21965 21754 22401 21843 22079 21545 22166 21847 22348 21756 22506 21485 22297 21777 22377 21664 22244 21515 22160 21815 22410 21873 22068 21775 22107 21637 22251 21853 22311 21760 22150 21456 21971 21578 22268 21713 22230 21674 22173 21643 22001 21552 22040 21754 22102 21712 22168 21712 22054 21585 22470 21649 22215 21798 22350 21700 22158 21621 22068 21646 22076 21687 22176 21701 22077 21831 22217 21724 22020 21730 22041 21617 21632 21736 22016 21794 22094 21755 22090 21714 21941 21488 21993 21729 22160 21892 21979 21846 22018 21824 21765 21941 22198 21820 21865 21729 21817 21706 22149 21939 22041 21917 21882 21750 22149 22239 21857 21899 21820 21641 22215 22293 21878 21741 22035 21612 22011 22228 22057 21868 21778 21612 22119 22144 21978 22212 21733 21926 21863 22279 21885 22126 21526 22123 21927 22246 21799 21837 21852 22217 21962 22066 21670 21956 22011 22235 21776 22075 21792 22245 21852 22119 21610 22085 22071 22305 21781 22009 21689 22240 21856 22175 21632 22272 21810 22106 21575 22131 21933 22289 21478 22132 21767 22322 21617 22008 21718 22393 21673 22098 21616 22369 21731 22001 21739 22416 21699 22008 21623 22313 21843 22205 21654 22285 21861 22158 21612 22435 21512 22349 21760 22109 21586 22025 21816 22173 21569 21960 21946 22129 21736 22022 21777 22204 21534 22205 21582 22161 21490 22091 21731 22172 21556 22011 21801 22098 21701 22096 21767 22051 21985 22168 21814 21991 21565 22128 21797 22017 21607 22151 21747 21975 21730 22169 21815 22028 21761 22023 21800 21914 21984 22117 21798 21937 22022 21962 21802 22164 21655 21770 21709 22139 21891 21879 22108 21826 21738 21997 21891 21857 21780 22344 21722 21729 22401 21736 21781 21979 21876 21851 21781 22177 21804 21761 22237 21857 
