# Supplementary material for: An Active Feature Selection Strategy for DWT in Artificial Taste
Source: Hindawi journal article supplement (doi:10.1155/2018/9709505), 2018-01-01
Supplement: f1 [file 9709505.f1.zip › beer-low-1.txt]

43473 39128 37212 37405 53 3652 10856 16101 17556 19764 19601 21066 21556 21931 22000 21716 21392 23024 22313 22592 21296 22376 23350 22471 21607 21768 22788 24035 21960 21550 22079 23078 23872 22315 21351 22063 22993 24183 21500 21717 22040 23410 23553 22364 21476 22253 23276 23991 22312 21668 22840 23466 23292 22386 21440 23330 23136 23511 22167 22208 22208 23470 24017 22468 21862 22000 22869 24150 22518 22469 21760 22580 23575 23216 23089 22234 22068 23504 23135 23372 22229 21735 22517 22939 23583 22641 23169 22485 22758 22532 23366 23086 23029 22549 22636 22561 23298 22904 23268 22850 22664 22471 23296 23193 22876 22665 22807 22400 23216 22853 23430 22580 22646 22772 23328 23060 22918 22343 22968 22880 23585 22626 22856 22192 23305 23030 23063 22217 22743 22880 23528 22658 23141 22193 23440 23103 23212 22520 23002 22528 23636 22638 23432 22471 23049 22698 23417 22837 22983 22123 23265 22847 23725 22240 22896 22388 23542 22938 23193 22112 23181 22769 23722 22375 23026 22721 23426 22671 23327 22156 23234 22582 23782 22455 23040 22695 23452 22743 23137 22396 23721 22445 23079 22233 9625 15735 18371 18000 20129 19720 20808 19639 21234 20746 31310 25879 25495 24216 24837 23194 23506 22976 23956 23031 23378 22637 24048 22529 23332 22518 23722 23096 23287 22543 23283 22905 23848 22560 23136 22696 23574 22556 23073 22528 23920 22473 22948 22235 23713 22858 23380 22163 23410 22805 23640 22503 23151 23070 23248 22209 22969 22866 23515 22580 22894 23004 23289 22404 22973 22831 23603 22602 23097 23186 23086 22197 23271 22640 23131 22252 23270 23108 23117 22285 23488 22756 23056 22104 23454 23233 22711 22890 24151 22357 22450 23555 23049 21914 22692 23009 22697 21941 23789 23041 22091 23280 24136 22256 22647 23895 22672 21583 23716 22741 22235 22194 23511 22848 21976 23343 23345 21844 23578 23680 22232 22508 24322 22456 22444 24053 22633 21824 24185 22307 21844 23537 22662 21493 23106 23018 21972 22797 22993 23201 22396 23417 22893 22660 22949 23314 22279 23387 22957 22720 23024 23200 22320 23364 23040 22816 22892 23412 22475 23182 23157 22824 22840 23462 22435 23382 22865 22870 22773 23445 22368 23444 22983 22784 22871 23616 22384 23396 22991 22969 22840 23579 22196 23478 23093 23040 22513 23794 22741 23158 23025 22949 15932 20048 19658 21273 21095 21372 21170 22377 20848 34074 26500 24836 23893 24266 22786 23957 22558 23652 22744 23287 23003 23368 22313 23936 22563 23076 23077 23208 22510 23912 22503 23558 23092 23256 22388 23925 22340 23513 22965 23151 22697 23780 22121 23635 22725 23136 22732 23693 22196 23650 22605 23073 22649 23076 22713 23302 22237 23753 22312 23233 22943 23434 22353 23958 22386 23554 22839 23024 22752 23458 22272 23534 22332 23335 22543 23050 22688 23146 22231 23476 22567 22925 23041 23580 22437 23577 22243 23467 22727 22989 22699 23053 22327 23197 22198 23671 22535 23091 23048 23013 22748 23558 22188 23429 22408 23205 22529 22918 22792 22980 22244 23884 22248 23403 23218 22150 23164 22857 22189 22963 21593 23996 22505 22836 23801 22048 23410 22711 22308 22924 21447 24135 22452 22752 23720 22051 23337 22809 22044 23027 21440 24069 22076 22944 23448 22060 22968 21832 23866 22507 21866 24198 21797 23503 22020 23235 22320 22147 24110 21910 23199 21917 23719 22532 23207 22550 22945 22710 22690 23125 22897 22997 23125 22738 23072 22652 23336 22440 23306 22469 23484 22471 23260 22976 22812 22648 22732 23173 22832 22887 22830 15924 20117 21006 21599 21379 22100 21275 22711 21472 22605 26178 25250 23482 23809 23372 23351 22824 23079 23232 23111 22932 23040 22955 23796 22737 23553 22621 23237 22354 23675 22222 23370 22304 23691 22272 23464 22183 23687 22338 23589 22267 23729 22856 23413 22586 23195 22506 22946 22880 23057 22597 22973 22835 23095 22650 23040 22949 23125 22656 22967 22915 23060 22768 23117 22936 23108 22710 23189 22912 23334 22662 23040 23001 23042 22500 23033 22860 23096 22700 22944 22880 22857 22544 22896 22810 23010 22356 23229 22643 23363 22081 23561 22521 23495 21784 23616 22183 23752 22244 23658 22218 23785 22222 23590 22055 23812 22016 23405 22105 23716 22321 23457 22105 23682 22149 23168 22320 23566 22448 23075 22667 23162 22965 22965 22726 22954 23206 22940 22716 22794 22998 23066 22512 23297 22546 23591 22297 23376 22353 23610 22221 23448 22841 22880 23265 22310 22656 22784 22722 23751 22176 23739 21544 23885 22308 22377 23276 21850 23932 22126 22232 23427 22052 24093 21760 22914 22485 22702 23991 21961 22348 23200 21733 24242 21905 22770 22500 22716 23877 22086 22748 22890 21948 24252 21712 22586 23290 21914 24076 22183 22219 23185 20113 21841 21992 21829 22705 21764 23102 21952 22960 27593 24068 23477 23554 22716 23250 22823 23280 23113 22817 22722 23150 22666 23645 22442 22967 22858 22824 22998 23405 22452 23151 22686 22931 23224 22855 22617 23389 22188 23494 22763 22987 22584 23320 22327 23777 22312 23168 22792 22916 22784 23517 22161 23147 22594 22870 22951 23406 22373 23373 22534 23092 22857 22997 22306 23584 21952 23605 22776 23017 22317 23384 22083 23726 22375 23072 22499 23125 22388 23790 22219 23207 22551 23026 22896 23097 22264 23540 22288 23206 22845 23047 22297 23520 22068 23531 22813 22884 22327 23461 22224 23448 22914 22980 22280 23577 21955 23664 22592 23014 22400 23544 22112 23593 22775 22912 22348 23116 22375 23759 22311 22884 22682 23120 22324 23596 22483 23033 22479 23390 22072 23371 22976 22773 22519 23190 22209 23480 22823 22833 22560 23328 22285 23289 23176 22808 22455 23385 22647 22209 23808 22927 22032 23152 22568 22083 23831 23290 21991 22994 22935 21745 23438 23507 21735 22528 23416 21665 23547 23504 21760 22444 23433 21813 22578 24240 22765 22240 22464 23218 21793 23837 23646 21965 22290 23556 22076 22636 23847 22685 22862 22585 21265 21592 22792 22883 22295 22151 22788 22512 22432 22885 24224 22737 23123 22992 22801 22406 23528 22615 23046 22487 23360 22355 23081 23063 23353 22217 22903 22875 22952 22579 23647 22584 22891 22359 23416 22166 23033 23040 23101 22294 23192 22720 22804 22848 23616 22120 22503 22543 23369 22057 23412 22921 23220 22058 23209 22569 23313 22149 23767 22672 22775 22263 23385 22711 22884 22476 23780 22787 22940 22346 23524 22437 22984 22605 23882 22093 23258 22505 23216 22007 23456 22951 23134 22098 23001 22700 23232 22279 23858 22426 22962 22305 23485 22322 22967 22662 23639 22175 23012 22366 23387 22123 23092 23005 23411 22127 23563 22482 23268 22320 22924 22920 23351 22253 23152 22753 23209 22202 23222 23069 23152 22073 23031 22661 23318 22141 23155 23222 23298 21948 22890 22996 23064 21797 23184 23872 23021 21744 22578 23028 23373 21680 22244 23680 24125 21752 22439 22720 23395 21661 22346 23660 23877 21809 22562 22561 23570 21674 22372 23945 23488 21768 22647 22882 23480 21932 22066 23757 23126 22723 22507 22986 22868 22949 22496 23385 22828 22706 22477 23101 22798 22637 22977 23319 22240 23387 22649 23226 22220 23320 23033 22993 22408 23191 22816 22932 22699 23492 22400 23013 22543 23376 22291 22962 22904 23562 22140 23248 22705 23176 22129 23560 22784 22932 22375 23248 22697 22992 22148 23652 22647 22982 22456 23281 22500 22827 22529 23704 22404 23072 22422 23476 22160 23252 22921 23408 22040 23244 22631 23232 21980 23668 22681 23000 22484 23277 22580 22833 22723 23564 22076 22999 22496 23383 22011 23360 22912 23172 22105 23136 22692 23232 22067 23521 22887 22928 22253 23168 22645 22944 22464 23698 22534 22853 22389 23324 22393 22838 22968 23399 22213 22796 22553 23261 22134 23226 23004 23225 22088 22988 22758 22945 22125 23781 23395 22218 22139 22824 23149 22371 21788 23817 23866 22327 22116 22681 23248 22298 22133 24150 23124 21843 22213 23012 23112 21957 22628 24246 23056 21917 22156 23555 22352 21801 23376 24092 22257 22156 22685 23023 22841 22344 23404 23044 22778 22695 23108 22855 22632 22836 23472 22352 23205 22761 23016 22256 23271 23209 23012 22400 22989 22632 23095 22392 23517 22757 22873 22362 23304 22664 22789 22395 23618 22569 22956 22383 23396 22453 22823 22755 23616 22210 23168 22316 23507 22135 23190 22869 23186 22100 23173 22600 23019 22074 23632 22920 22944 22336 23154 22652 23009 22140 23739 22666 23118 22278 23381 22597 22894 22287 23860 22656 22785 22448 23141 22663 22907 22257 23708 22592 13831 17913 20341 19224 20652 20573 21972 20830 21269 39456 28672 25018 24335 23823 24245 22695 23547 23072 23397 22433 23712 23261 23049 22656 23251 22839 23013 17093 20729 20994 20997 21096 22277 21658 21037 22358 33909 25398 23888 23521 24359 22519 22355 24055 24323 22142 22660 23009 23252 21620 23320 24098 22241 10653 19572 21586 20880 21073 23118 22923 21262 21868 22246 28293 24149 24116 23673 23536 22772 23315 23240 23085 22849 23624 22882 22901 22726 23489 22390 23088 17233 21281 21337 22296 22311 22385 22128 23075 22136 22569 25146 24424 22858 23636 23296 23465 22621 23235 22860 23067 22554 23815 22653 23104 22480 23640 22253 21057 22017 23182 21661 23108 22204 23320 21927 23072 22791 24552 22765 23521 22725 23085 22561 23829 22537 23115 22460 23627 22108 23240 23012 23051 22588 23223 22587 23015 22588 23912 22195 23296 22435 23578 22253 23281 23112 22923 22550 23271 22739 22857 22708 23681 22092 22465 22706 23204 22248 23447 22992 22825 22112 23211 22553 22768 23200 23511 21833 22948 23183 22222 22607 24285 21520 22474 23370 22295 21935 24270 22806 22292 22408 23607 21700 22542 23940 22761 22127 22735 23235 21676 23406 24077 21735 22127 23069 22661 22613 23091 23268 22332 22859 22907 22600 22969 23438 22348 22964 22901 22877 22490 23527 22637 22901 22649 22911 22474 23632 22544 22924 22599 23445 22135 23286 23062 23024 22472 23140 22717 22873 22611 23562 22160 23184 22756 22925 22426 23776 22251 23284 22418 23362 22052 23636 22688 22922 22369 23456 22053 23552 22732 22903 22314 23626 21928 23340 22855 22940 22336 23326 22540 22903 22696 23488 21943 23200 22670 22990 22265 23787 22208 22802 22624 22925 22710 23724 22125 22681 22675 23143 22348 23661 22560 22841 22409 23371 22225 23376 22981 22769 22416 23385 22144 23329 22856 22269 22497 23585 21838 23081 23757 22128 22411 23525 21670 22817 23730 22043 22225 23581 21683 23174 23749 21879 21578 23424 21914 22491 24076 22307 22309 23250 21917 22949 23357 22328 22997 22859 22751 22773 23528 22397 22976 22852 22854 22701 23492 22836 22744 22519 23058 22188 23541 22619 22823 22541 23257 22242 23416 22912 22851 22370 23355 22325 22917 22928 22972 22566 23307 22552 22900 22569 23619 22087 22857 22488 23329 21924 23457 22652 22969 22511 23397 22330 22888 22776 23552 21965 23113 22496 23159 22157 23654 22496 22988 22336 23366 22144 23143 23010 23016 22208 23349 22487 22953 22520 23735 22001 23193 22582 23255 22012 23620 22757 22759 22205 23318 22371 22824 22999 23442 22231 22983 22691 22816 22694 23618 22253 23046 22471 23288 22028 23216 23433 22183 22397 23464 22028 22240 23945 23302 21766 22602 23200 22034 22551 24293 22310 22332 22279 23490 21574 22474 23961 22260 22223 22839 23261 21761 23267 24176 21965 22149 23040 22621 22689 23056 23072 22392 22961 22898 22608 22741 23524 22565 22784 22501 23214 22251 23255 22946 22811 22096 23268 22734 22739 23109 23209 22331 23153 22592 22927 22602 23640 22080 22994 22634 23033 22217 23593 22554 22976 22310 23467 22108 23193 22693 23387 21914 23113 22659 23137 22279 23655 22576 22886 5160 17758 18656 20167 20420 21536 20176 21303 21020 21728 30614 27012 24489 24216 23095 24056 17201 20992 21250 21989 21046 22132 21777 21975 21691 33568 25534 24759 23717 23581 23000 18698 20485 21801 21744 22565 21518 22853 22427 22331 21552 26317 23444 24140 23735 22711 16287 21869 21399 21589 23417 22340 21632 22459 22485 21509 26453 24576 22708 23377 23471 22022 22845 22972 21497 22353 23133 22232 21731 23928 22704 24167 23072 23672 22858 22919 23780 22608 23283 22896 23243 22496 23499 23072 22845 22647 23287 22384 23482 22976 22888 22547 23409 22309 23339 22953 22820 22445 23405 22325 23481 22901 22968 22441 23548 22138 23435 23005 22835 22434 23456 22109 23516 22873 22905 22297 23500 22048 23578 22768 22949 22400 23497 22092 23358 22880 22860 22244 23536 22071 23529 22686 23111 22342 23579 22016 23598 22832 22884 22290 23624 21933 23591 22816 22819 22457 23552 22117 23401 22672 23077 22420 23428 22086 23459 22682 22939 22408 23352 22183 23297 22919 22801 22471 23428 22098 23515 22432 22932 22614 23013 22236 24074 21768 22594 22962 22459 22216 24183 21575 22501 23223 22112 22836 23860 
22416 21702 22071 21199 22810 21722 22285 21923 21707 21526 22086 21253 22147 21163 22379 21394 21740 22076 21946 21393 22677 21068 22273 21826 21778 21697 21868 21883 22088 21229 22660 21623 22061 22021 21527 21801 21963 20436 21718 20960 21533 20547 21350 21008 21554 21050 21370 20855 21729 20866 21448 20584 21629 21440 21368 20875 21225 21100 22128 20912 21733 20757 21453 21123 21824 21363 21696 20697 21655 21224 22056 21093 21433 20698 21767 21591 21528 20996 21293 21212 22037 21146 21691 20902 21466 21155 21693 21555 21742 21415 21494 20832 21742 21413 22243 20995 21546 20759 21812 21568 21829 21424 21533 20893 21693 21418 22181 21212 21745 20896 21688 21646 21805 21250 21250 21201 22023 21362 21808 21012 21468 21625 21879 21623 21614 20960 21576 21492 22049 21784 21348 21143 21870 21728 21617 21090 21461 21533 22080 21158 21520 20987 21679 21681 21681 21166 21257 21319 22083 21351 21799 21143 21303 21641 21842 21897 21492 20726 21897 21673 21775 20747 21215 22299 21552 21100 20650 21032 21940 21977 22101 20750 20807 22262 21493 21143 20435 21487 22836 20941 20583 20737 22160 22515 12574 12281 15136 14933 15141 14547 16256 17257 16093 15275 25934 25195 24477 22725 22024 22833 22679 22575 21364 21858 23328 21665 21048 21302 22351 22714 21504 21792 22016 21985 21768 21675 21507 22368 21509 21731 21185 22081 22079 21658 21249 21782 21773 22073 21417 21721 21754 21794 21625 21446 21416 22160 21231 21488 21414 22025 21655 21709 21347 22089 21255 21619 21177 22007 21713 21534 21368 22260 21304 21403 21426 21808 21341 21464 21429 22237 21128 21403 21517 21922 21144 21468 21419 21981 21005 21825 21711 21824 20840 22104 21132 21513 21117 21888 21251 21387 21486 21945 20845 21998 21552 21799 21074 22321 21102 21447 21384 21602 20969 21504 21377 21953 20847 21963 21595 21457 21276 22179 21129 21872 21581 21688 20977 22208 21007 21600 21543 21782 20973 21946 21120 21505 21312 21865 21184 21513 21332 21651 21112 21882 21603 21600 21511 22330 20900 21926 21461 21582 21373 22314 21081 21840 21582 21647 21271 22231 21293 21850 21637 21595 21278 22181 21251 21682 21785 21677 21361 22135 21209 21773 21868 21666 21231 22185 21275 21550 21884 21605 21222 22199 21191 21739 21820 21550 21093 22114 21228 21346 21747 21528 21095 15820 16721 17555 18780 18344 18229 20008 18864 19023 20266 25446 24130 24608 21897 23086 22786 21400 22608 22199 21147 22424 21104 21465 21819 20875 22051 21620 20553 22338 21208 20497 22437 21351 20567 22277 21211 20673 22730 21081 20992 22880 20978 21422 22743 20948 21665 22749 21155 21380 22639 20753 21899 22073 20695 21571 21655 21243 21728 20893 22103 21289 21493 21831 21516 21168 22291 21433 21769 21892 21405 21684 21877 20976 21916 21436 21403 21676 21584 21564 21819 21440 21873 21481 21524 21964 21850 21473 22602 21460 22197 21792 21576 21864 22240 21192 22193 21376 22359 21685 21783 22157 22240 21571 22632 21409 22364 21505 22066 21672 21937 21890 22029 21401 22629 21696 22313 21984 21883 21849 22208 21559 22246 21197 22633 21988 22176 21968 21892 21801 22231 21429 22113 21265 22535 21941 22202 22094 21913 21864 22210 21443 22124 21193 22579 21663 22320 21845 21936 21529 21753 22059 22116 21366 22630 21332 22420 21419 22488 21598 22148 22011 21795 21748 21782 22144 21888 21803 22147 21426 22103 21346 22503 21325 22356 21383 22407 21505 22181 21815 21899 21656 21766 21976 21943 21725 22243 21416 22103 21285 22615 21333 22267 17761 19875 19181 20223 19894 20302 20066 20442 20640 20194 23281 22482 22589 22026 21992 21965 21584 21760 21097 22301 21162 21959 20949 22103 21288 21921 21423 21932 21252 21808 21767 21464 21280 21533 22030 21023 21561 21031 22557 20877 22000 21020 22163 21376 21737 21917 20977 21582 20796 22760 20580 21729 20456 22919 20772 21993 20631 23076 20824 22119 20548 23072 20782 22288 20768 23079 20936 22458 20640 23224 20679 22223 20749 23057 20701 22288 20839 23157 20832 22158 20594 23152 20877 21705 21060 22349 21575 21015 22156 21488 22466 21442 22213 21361 22304 21227 22170 21260 22411 21352 22016 21127 22276 21221 21914 21404 22261 21357 21835 21161 22385 21256 21994 21386 22388 21504 21891 21670 22098 21838 21874 21708 21721 22167 21581 21819 21732 22049 21765 21413 21952 21590 22343 21399 22333 21192 22421 21192 21810 21440 22002 21750 21768 21645 21542 21824 21890 21756 22230 21141 22476 21027 21985 21459 21995 21851 21696 21377 21895 21546 22309 21179 22145 20978 22354 21546 21909 21680 21762 21791 22245 21277 22113 21352 22320 21477 22119 21782 21712 21751 22059 21204 22160 20992 22290 21664 21698 21482 21845 21443 22400 17856 20331 19985 20914 20757 20838 20613 21033 20704 21590 22163 22443 21834 21865 21935 22120 21543 22208 21068 22409 21419 21538 21755 21607 21565 22184 21179 21873 21608 21673 21881 21793 21260 21947 21124 22258 21786 21430 21381 21831 21206 22365 21315 21659 21611 21604 21677 22238 20992 21684 21596 21459 22247 21824 21168 21856 21511 21394 22734 21129 21271 22283 21058 22471 22404 20773 21397 22086 20579 23034 21655 21303 21943 21267 21423 23033 20707 21383 22214 20714 22748 21442 21168 22199 20695 21866 22912 20896 21278 22416 20757 22190 21968 21193 21641 22233 20668 22711 21985 21242 22048 21717 21732 21848 22184 21445 21961 21792 21606 22106 22042 21504 21895 21825 21569 22160 22245 21601 22181 21501 21966 22100 21665 21520 21992 21496 21942 22055 21949 21345 21917 21824 21772 22051 21884 21445 22045 21587 21775 21893 22343 21199 21871 21725 21906 21475 22528 21344 22027 21617 22101 21316 22564 21462 22024 21665 22210 21184 22576 21408 22093 21504 22227 21229 22518 21991 21767 21610 22292 21251 22389 21896 21861 21403 22472 21507 22009 21981 22336 21248 22134 21708 21571 21913 22439 21179 21920 21688 21902 21493 22481 21831 20544 20448 21531 20482 21653 21455 21405 21088 21739 22809 22432 22305 22536 21367 22119 21848 21971 21594 22513 21878 21736 21560 22202 21564 21731 22152 22432 21345 21991 21888 21813 21476 22549 21770 21742 21618 22263 21583 21979 22219 22071 21556 22213 21915 21344 22296 23003 20859 21543 21834 22640 21068 21655 23034 22516 21049 22178 22340 21874 20806 22864 22947 21325 21302 21718 22375 21376 20935 22939 22860 21320 21747 22279 22327 21166 23075 22860 21127 21229 21708 22304 21081 21597 22784 22076 21607 21660 22311 21507 21837 22169 22301 21379 22161 21713 22135 21389 21964 22260 21954 21629 21968 21883 22057 21782 22261 22193 21987 21453 21967 21793 22276 21431 22284 22144 22084 21600 22039 21802 21890 21500 22611 21914 21889 21433 22041 21868 22177 21319 22679 22051 21892 21350 22055 21732 22029 21303 22608 21934 22136 21273 22176 21596 22279 21242 22311 22127 22002 21201 22045 21692 22148 21361 22199 22046 22337 21168 22113 21651 22232 21196 22509 22056 22120 21373 22017 21575 22329 21312 22133 22300 22316 21125 22181 21626 22241 21465 22509 21981 21928 21468 22131 21760 21863 21853 22593 21622 21985 21713 22361 21447 22146 22215 22103 21382 21900 21805 21745 21608 22506 21816 21670 21504 22145 21737 21664 21946 22624 21277 22400 21916 22233 21222 22499 22787 21689 21071 21696 22173 21893 20905 22587 22971 21746 21266 21888 22351 21066 21536 23393 21903 20961 21463 22647 20915 21383 22983 22549 20960 21879 22141 22053 20707 22586 23015 21076 21408 22037 22004 20904 22514 22176 21932 21527 22086 21935 21817 21679 22514 22056 21637 21844 22142 21910 21717 21960 22566 21706 21817 21594 22279 21420 21873 22029 22276 21270 21536 21836 22000 21453 22389 22209 21909 21496 22238 21890 21998 21319 22485 22023 21927 21523 22240 21666 21821 21739 22737 21789 21834 21079 22385 21860 22091 21396 22867 21893 21922 21524 22407 21713 21813 22061 22709 21619 21837 21557 22599 21559 21895 21764 22738 21319 22117 21782 22423 21394 22126 22032 22363 21587 22007 21738 22371 21286 22580 22016 22096 21527 22223 21964 21930 21794 22784 21444 22096 21608 22464 21351 21931 22166 22427 21400 22187 22008 21900 21496 22528 22110 21863 21510 22019 22008 21909 21555 22567 21915 21646 22051 22113 21922 21220 22109 23207 21624 21286 21527 22502 21264 21775 23127 22189 20884 21985 22113 22208 20783 21956 23188 21974 20927 21468 22280 21868 20836 22323 22689 20988 21199 21553 22400 21303 21010 22212 22412 21490 21787 21396 22378 21575 21713 12950 9593 11081 10622 12539 13735 13580 14164 14881 37865 30493 27736 25670 25076 23331 23977 23207 22569 22708 22691 22323 22337 22164 23040 21909 22076 2673 10997 13540 15285 16088 17377 16545 17566 17273 18348 33161 29056 26337 25351 23273 23881 22651 23239 21961 22854 22583 22552 21920 22462 22038 22311 21817 9981 14104 16736 17297 18767 18693 19034 19164 20243 19216 30016 26103 25280 23153 23373 22780 23204 21793 22624 22190 22424 21640 22995 22083 21355 21367 22041 18212 19904 20590 20920 20027 20700 20804 20756 20453 21456 22906 22123 21786 22345 21365 21809 22048 21828 20889 21549 21881 21120 20952 22576 22275 20692 21087 21068 20622 19935 21621 22323 20636 20391 20835 21809 22183 21294 22951 21504 20996 21436 22109 20672 20955 22777 21796 20745 21074 21956 21223 21280 22259 21252 21458 21252 21752 21026 21732 21848 21783 20973 21527 21511 21277 21328 22187 21091 21462 21168 21750 20898 21810 21594 21405 21111 21660 21343 21271 21423 22087 20985 21568 21260 21855 20928 22142 21527 21404 21271 22219 20999 22317 21617 21628 21703 21984 21264 21585 21755 22120 20963 21766 21512 21659 21199 22464 21512 21703 21287 22106 20987 22026 21849 21861 21302 21841 21539 21645 21692 22246 21355 21964 21328 21719 21686 22195 20985 22208 21561 21687 21315 22279 21121 21696 21751 21589 21301 22274 21300 21474 21307 22039 21044 21811 22009 21744 21351 21850 21702 21200 22389 22295 20577 21517 22086 20701 21431 23058 20935 21155 21655 21413 21079 23018 21648 20742 21877 21780 20635 22938 21766 21015 21365 22246 20656 22109 23082 21358 21776 21698 22156 21324 22397 21807 21546 21645 22193 21460 22115 22104 21620 21629 22205 21193 22231 21982 21864 21678 22220 21481 21743 22089 22199 21352 22000 21770 21782 21783 22225 21287 21961 21612 21733 21856 22321 21160 22001 21667 21775 21652 22613 21101 21990 21707 21607 21710 22329 21148 21840 21712 21931 21683 22400 21218 22087 21697 21911 21542 22692 21332 22221 22019 21863 21964 22567 21159 22137 21888 21847 21779 22707 21273 22352 21953 22263 21456 22515 21587 21779 21637 22075 21428 22532 21873 21639 21745 22336 21282 22474 21973 21490 21527 22195 21676 22116 22233 21489 21313 22041 22009 20960 21985 23109 20922 21618 21926 22232 20676 22546 23066 21112 21352 22237 21689 20994 22927 22790 21001 20925 22327 21511 21145 22887 21623 21239 21905 22010 21752 21657 22700 21750 21934 21488 22184 21452 22321 22074 21535 21573 22016 21605 21844 21953 22407 21232 21975 22029 21953 21378 22440 22010 21677 21504 22410 21217 22032 22083 22031 21435 21976 21806 21716 21577 22664 21312 22304 21734 22189 21110 22584 21735 21712 21458 22448 21350 21864 22008 22380 21187 22086 21733 21968 21467 22712 21504 21921 21489 22428 21216 22238 22062 21806 21327 22293 21411 21950 22066 22183 21308 22136 21797 21991 21525 22626 21738 21771 21607 22272 21404 22117 22149 21712 21877 22285 21712 21815 22094 21975 21678 22103 21810 21632 22097 22323 21009 22024 22208 21618 21224 23160 22288 21193 21443 22556 21673 21271 22908 22736 20890 21654 22384 21265 21232 23192 2501 8695 11125 13340 13866 13372 15028 16556 14373 14848 33624 28761 26352 25318 24342 23153 10795 14567 15941 16877 18014 17884 17879 17992 18647 33624 29125 26630 24937 23688 23925 12362 16291 18128 18866 18656 19571 19495 19596 19675 34253 27475 25740 24136 23529 22931 15498 17216 19432 19558 20487 19848 21456 20294 20989 20449 27281 24017 24329 22716 22804 17544 20198 19847 21735 21175 21207 20528 21906 21097 21513 25031 24023 22240 22682 22464 22455 21778 23144 21572 22478 21909 22473 21585 22968 22052 22154 21806 22530 21522 22695 21959 22040 21838 22537 21382 22625 22299 21998 21678 22421 21404 22629 22091 21931 21800 22553 21471 22866 22176 21369 21816 22472 20891 23032 22490 21511 21968 22363 20898 23200 22321 21115 21658 22607 20807 22864 22377 21264 21769 22293 20728 22409 20956 20818 21176 21322 21228 21627 21778 20917 21685 21475 21200 21575 21848 20888 21568 21523 21268 21789 21376 21237 21892 21440 21590 21693 22148 20999 21636 21590 21492 21975 22210 21145 21952 21568 22042 22023 21988 21191 22340 21681 22165 22023 21911 21594 22448 21143 22409 21806 21632 21491 22322 21209 
22408 20772 22113 21542 20809 22861 21273 21428 22971 21034 22569 21920 21385 22136 20923 22033 21601 21586 22183 21880 21641 22217 21559 21984 21818 21619 21652 21444 21976 21609 21524 22198 21641 21963 21897 21581 21918 21628 21820 21819 21426 22328 21536 22024 21921 21713 21905 22033 21323 22149 21485 21825 21622 21736 21747 21828 21340 22543 21385 22252 21760 21717 21792 21814 21454 22027 21218 22263 21307 21884 21956 22027 21644 22352 21204 20656 21984 22315 22481 21357 20635 21146 22063 22277 21572 21902 21545 21459 21624 22099 22117 21767 21713 21696 21563 21981 21905 22060 21602 21456 21461 21979 22128 21744 21719 21767 21349 21648 21888 22189 21592 21384 21590 22041 22039 21720 21313 21648 21952 22251 21515 21549 21416 21900 22053 21767 21370 21616 21655 22101 21799 21947 21327 21938 22084 22022 21690 21856 21393 22100 21751 22235 21142 21576 21608 22161 21888 21933 21198 21748 21872 22442 21447 21529 21365 22103 22076 21889 21245 21687 21926 22387 21396 21648 21521 22186 21869 21971 21286 21729 21731 22509 21397 21685 21520 22197 21816 22013 21265 22240 21532 21955 21275 22002 13795 16759 17200 18625 19107 19876 19365 20009 20191 36178 25834 23758 22763 23001 21741 21878 21371 22312 21789 22032 21336 22247 21609 21989 21240 22170 21939 21925 21248 21808 21774 22461 21389 21653 21412 22253 21680 21948 21408 22413 21504 21817 21265 22189 21818 21910 21189 21858 21813 22405 20845 21665 21738 22081 21384 21587 21696 22355 21492 21624 21584 22120 21524 21716 21677 22342 21475 21582 21857 21909 21297 21671 21813 22214 21316 21744 21792 21904 21290 21786 21855 22190 21213 22069 22220 21934 21449 22725 21464 21185 21616 22130 21581 21081 22240 22356 20992 22444 22631 21556 21352 23152 21579 21030 22086 21991 20752 21591 22229 21965 20833 22486 22551 21322 22002 22805 21286 21769 22848 21470 21086 22717 21354 20795 22369 21854 20721 22121 21675 21091 21261 22229 21097 21257 22447 21953 20892 21984 22096 21604 22009 22113 21703 21864 22243 21498 22016 22135 21770 21818 22235 21702 21824 22093 21728 21483 22224 22189 21704 22125 21016 21547 22237 20957 21716 22080 22030 21543 22257 21778 21964 22081 21816 21511 22250 22057 21715 22091 22158 21589 22417 21409 21834 21928 21932 21347 22292 21479 21590 21956 21879 10167 18679 19461 20368 20948 20890 20519 21651 20663 21416 27913 24192 22673 22882 21714 22323 21767 21741 21750 22039 21221 22199 21332 21806 21586 21613 21744 22035 21211 22263 21520 21719 21926 21888 21248 22353 21360 21824 21931 22433 21410 22460 21593 21945 21849 21960 21479 22400 21335 22075 21849 21813 21824 22240 21312 22231 21514 22115 21549 21731 21831 21889 21136 22301 21387 21766 22023 22039 21568 22455 21280 22336 21747 21767 21783 22171 21236 22189 21308 22007 21718 21805 21455 21927 21218 22368 21451 22044 21984 21799 21735 22104 21273 22260 21598 21832 21571 21650 21826 21751 21328 22400 20976 22070 21859 21685 21846 21813 21461 22000 21253 22234 21549 21472 22523 21820 21787 22788 20908 22530 21236 21558 21728 20859 22795 20800 21459 22976 20999 22631 21548 21719 21603 20756 22656 21453 21694 22652 21000 22631 21488 21686 21615 20774 22840 21500 22217 21893 21101 21811 20569 22545 21284 21920 22424 21142 22180 20893 22319 21376 21833 22544 21047 21853 21021 22257 21438 21948 21751 21699 21703 21484 22204 21545 21958 21359 22208 21673 22040 21921 21569 21608 21568 22157 21639 21997 21725 21991 21715 21802 22019 21453 17848 19863 21354 20747 21668 21123 21644 21185 21587 30672 23968 22530 21876 22327 21769 21882 21815 21642 21776 21568 22260 21329 22024 21248 22331 21520 22164 21263 22283 21451 22200 21561 22221 21476 22086 21777 21840 21446 21866 21952 21765 21685 21705 22016 21928 21888 21969 21640 21927 21735 22116 21462 21880 21538 22269 21365 21900 21564 22247 21385 21895 21505 22273 21323 21877 21281 22264 21276 21914 21376 22168 21426 21896 21576 22147 21205 21992 21405 22266 21428 21949 21711 22064 21680 22343 21843 21824 22016 21860 21738 21751 21963 21831 21650 21790 21881 21773 21565 21952 21808 21735 21373 22023 21655 22024 21328 22145 21511 21984 21469 22048 21686 21980 21395 22128 21370 22357 21617 22214 21201 22391 21208 21966 21510 22200 21303 21888 21542 22016 21895 21962 21820 21580 21930 21672 21473 22008 21700 22297 21337 22215 21228 22498 21053 21808 21808 21578 22540 21193 21815 21292 22220 22224 21249 22587 20615 22808 21392 21505 22341 20724 22709 21186 21303 22201 20920 23122 20966 21451 22281 20896 22692 21568 21748 22541 20952 23184 20960 21676 21941 21106 22871 21256 21221 22423 20695 22840 21245 21351 22384 20663 17421 20177 21222 21655 21331 21907 21636 20897 22008 21341 24753 22756 21877 21909 21872 21550 22311 21473 21800 21945 21600 22186 21610 21584 22023 21272 22036 21894 21769 21715 21953 21344 22279 21363 21776 21959 21565 22000 22100 21586 21914 21635 21734 21959 21613 21483 22213 21383 22141 21867 21783 21464 21957 21185 22289 21667 21851 21615 22033 21386 22421 21412 22283 21768 21593 21707 22357 21348 21969 21669 21703 21970 21884 21319 22136 21472 21943 21988 21745 21477 22120 21338 22412 21356 21981 21760 21904 21537 22407 21240 21961 21893 21685 21849 22332 21325 21998 21760 21619 21785 22224 21287 21868 21746 21740 21840 22135 21360 22109 21675 21751 21824 22212 21408 21990 21730 21751 21940 21670 21616 22179 21408 21854 22023 21872 21680 22085 21669 21751 21862 22167 21321 21885 21696 21767 22032 22032 21538 21928 21845 21564 21815 22346 21056 21804 21884 21711 21347 22826 21480 21747 21857 21872 20939 23107 21425 21624 21861 21696 20845 23094 21874 21476 21713 22344 20593 22407 21868 21312 21632 22464 20606 22579 22580 21129 21465 22183 21703 20951 22839 21790 21201 21703 22346 20792 21737 23016 20963 21899 21960 21853 21548 20887 21847 21302 21648 21917 21403 21608 22216 21636 24393 22348 22199 21436 21963 22170 21623 21773 21975 21736 21495 21873 22221 21447 21786 21633 22083 21422 21960 22004 21544 21580 21973 21616 21634 21769 22246 21361 22124 21838 21991 21292 22386 21592 21738 21473 22280 21468 21838 21879 22208 21265 21881 21624 22215 21229 22127 22009 21878 21504 21960 21849 21894 21281 22313 21872 21698 21664 22019 21678 21797 21381 22425 21529 21747 21484 22279 21169 21863 22007 22225 21333 21848 21644 22087 21239 22080 22055 21704 21280 22071 21815 21667 21520 22521 21552 21803 21366 22141 21529 21697 21905 22334 21410 21963 21427 22330 21377 21734 21799 22379 21528 21805 21607 22266 21296 21752 22024 22135 21251 22112 21660 22243 21312 21936 22001 22232 21001 21760 21664 22166 20945 21736 22629 22327 20915 21785 21830 22311 20786 21145 22505 22976 21271 21377 21220 22650 20996 21127 22418 22818 21158 21413 21321 22624 21291 20898 22306 22896 21103 21616 21497 22593 21096 21053 22308 23108 21376 21466 21679 21952 21798 21315 21966 22171 21633 21577 21841 21943 21488 21734 22272 21991 21672 21622 22034 21537 21647 22071 22099 21323 21783 21896 21944 21305 22057 21905 21626 21577 22041 21633 21600 21880 22385 21437 21888 21500 22219 21257 22030 22034 21914 21419 21867 21805 21944 21233 22259 21967 21808 21430 22016 21825 21840 21213 22321 21816 21720 21472 22114 21662 21595 21565 22373 21193 22128 21563 22240 21232 22030 21907 22039 21293 21974 21757 21879 21412 22324 21720 21889 21541 22252 21299 21920 21905 22344 21179 21816 21639 22163 21252 22037 21943 21976 21366 21825 21720 21843 21324 22298 21937 21648 21568 22135 21837 21601 21568 22460 21632 21977 21526 22215 21328 21799 21941 22245 21341 22030 21568 22172 21239 21978 22166 21768 21144 21699 22053 21754 20810 22371 22763 21763 21015 21484 22145 22057 20588 22020 22662 21312 21225 21895 22304 21291 20669 22669 22613 21248 21456 21854 22291 20880 21824 23025 21792 21303 21243 22371 22029 21068 21932 22128 21756 21608 21686 21986 21829 21493 22245 22081 21431 21672 22067 21521 21545 22151 21925 21402 21686 21864 21979 21239 21908 22114 21605 21323 21856 21805 21513 21572 22303 21910 21679 21846 21911 21715 21605 21701 22407 21674 21831 21572 22081 21543 21667 21873 22345 21221 21837 21675 22064 21203 22107 21990 21869 21228 21888 21770 21971 21175 22145 21883 21882 21367 21923 21751 21791 21389 22376 21795 21831 21521 21888 21856 21781 21356 22308 21837 21731 21598 22061 16473 19239 19254 21061 20434 20520 20619 20988 20769 30371 24640 23810 22334 22109 21666 22364 21240 22072 21954 21959 21271 21831 21829 21960 21233 22195 11730 18638 19989 20823 21191 20803 20839 22443 21258 20824 26601 24369 22723 21312 22144 23300 21607 21341 21296 22572 21616 21217 22868 22285 20843 21457 22351 16041 18912 21574 22229 21145 20897 21357 22122 21019 21026 25238 23201 21737 21978 21884 22016 21431 22001 22335 21605 20993 21920 21808 21514 21841 22259 21488 18678 20657 21536 20999 21938 21801 21415 21974 21947 29908 23400 22535 22566 21417 21879 21744 21943 21320 22221 21886 21594 21253 22040 21847 21784 21680 22448 20137 21504 21243 22112 21385 21614 21706 22276 21210 24673 22324 22231 21354 22503 21847 21756 20793 22066 21736 21640 21760 22391 21352 21864 21792 21912 21208 22509 21753 21735 21422 22272 21544 21688 21817 22380 21224 21878 21836 21831 21384 22336 21851 21721 21424 22309 21422 21725 22033 22024 21345 21833 21876 21765 21410 22452 21217 21807 21554 22358 20848 22603 22496 21104 21202 22513 20608 22112 22923 21414 21296 22103 21970 20897 22248 22807 20929 21132 22059 21884 20597 22858 21904 21177 21328 22672 20834 21341 22561 21755 21896 21685 22016 21423 22162 21749 21559 21622 22102 21441 21863 22082 21583 21927 21973 21623 21764 22096 21568 22048 21970 21712 21611 21852 22217 21377 21799 21796 21796 21360 22378 21772 21608 21540 22217 21203 22131 21913 21725 21484 22213 21419 21839 21990 22037 21430 22024 21715 21632 21767 22076 21488 22002 21675 21675 21709 22321 21209 21858 21824 21979 21217 22360 21544 21891 21450 22253 21131 22374 21822 21635 21433 22240 21357 22059 21781 21810 21349 22156 21451 21819 21948 21821 21361 22048 21669 21713 21891 22164 21301 21888 21814 21607 22016 22255 21259 21845 21984 21099 22406 22779 20788 21433 22445 21014 21879 22893 20887 21677 22194 20780 22218 22697 20961 21493 22441 21000 21873 23012 20919 21463 22389 21159 21528 22793 21048 21685 22088 21377 21938 22023 21463 21552 22097 21457 21817 22183 21498 21792 21854 21836 21638 22145 21878 21614 21952 21769 21584 21811 22169 21375 21776 21847 21616 21691 22340 21384 22011 21777 21776 21371 22293 21777 21735 21396 22204 21376 21834 21911 22040 21315 21921 21742 21824 21424 22407 21544 21809 21527 22318 21288 22089 21856 21857 21599 22011 21767 21729 21872 22216 21366 21969 21653 21952 21193 22409 21769 21749 21434 22227 21211 22054 21911 21961 21380 21857 21755 21641 21750 22405 21373 21800 21551 22175 21231 22083 21808 21645 21399 22147 21517 21712 22087 22247 21005 21696 22125 21399 21600 23048 21099 21678 21821 22231 20562 22378 22692 21120 20586 22258 21819 20861 22156 22937 21019 21504 22398 21668 20725 22624 22188 21157 21281 22521 21523 21635 22296 21599 21762 21865 21962 21473 22077 22072 21474 21339 21961 21748 21620 21973 22078 21351 21758 21885 21632 21604 22294 21474 21760 21734 21967 21366 22423 21637 21846 21457 22150 21281 22048 22042 21781 21401 22033 21768 21570 21697 22377 21330 21949 21587 22201 21261 22061 21875 21728 21931 21976 21776 13788 18208 20314 20018 20505 20242 21200 20298 21016 20967 26877 23587 23069 22144 21953 10059 19256 19784 20983 20986 21511 20632 21691 21525 21225 27036 24186 22259 22263 22276 21761 18157 20855 20896 21185 21588 22041 21091 21671 21576 28176 23776 22999 21372 22023 22154 18237 20704 22514 21009 21355 21818 21929 20736 22898 21595 23075 22272 22100 20969 22948 19509 20684 21401 22168 20515 21825 22853 21388 21331 21888 23239 21216 22581 22244 21566 21665 22103 21640 21757 22064 21810 21648 21888 21857 21423 22072 21879 21569 21760 21820 21537 21863 22262 21309 21790 21910 21628 21837 22105 21358 21837 21863 21590 21875 22236 21347 21815 21824 21637 21700 22270 21435 21847 21807 21621 21869 22119 21410 21868 21829 21549 21767 22259 21268 21881 21778 21672 21776 22204 21399 21974 21720 21863 21867 22103 21392 21971 21745 21782 21796 22221 21297 21934 21754 21603 21780 22259 21306 22032 21547 21770 21892 22009 21552 21891 21720 21588 21851 22275 21388 21937 21677 21538 21821 22248 21425 22130 21433 21866 22226 21487 21219 22435 21007 21722 22715 21210 21184 22608 20587 22201 22521 21151 21452 
42828 35395 39504 33451 35497 37342 40628 42272 38912 38171 34035 37309 41688 40150 37193 38647 34070 33625 40360 37261 34437 40709 33847 38021 36526 34277 34340 42148 38384 34269 32832 40421 34631 38057 37364 33944 37529 34487 36397 36562 42065 42052 33256 38362 37568 35304 37221 38667 41301 40192 43164 36704 34336 35488 35688 36423 41330 34042 41581 41451 35755 35379 35867 36393 42544 38999 40154 41607 41312 37488 37932 38847 34571 41874 40128 41353 39623 38720 34124 34096 38913 34452 32805 42136 41344 41417 34977 35637 34385 34592 36416 37376 41952 42969 42454 38960 37571 34584 36525 39201 41455 40216 41082 41312 42722 35533 37190 36952 35677 40896 38576 40634 34112 38711 38981 35458 40839 34525 37643 41365 33244 33324 41792 37538 39008 36001 41659 34313 34571 39445 36425 38023 41443 37891 39286 38683 35180 36660 41669 39648 36069 41110 39488 33762 33895 39923 37122 37873 40041 35847 36882 43067 42824 33449 41472 39859 39415 37216 40631 35317 37556 42609 42036 34588 32780 40252 37351 38237 40768 35649 35504 43876 42208 35283 32711 40376 36520 38813 40426 41043 33380 37849 40738 38616 33352 33251 37542 32775 37890 36280 40720 37888 40012 37044 38326 37079 36386 38866 35921 37179 41814 41824 36435 38481 41260 41457 34392 38343 40425 40411 37978 37708 40070 36283 35959 43364 42188 34848 41824 41582 34999 37875 41813 43072 32904 36309 40320 40755 36643 37448 39832 36951 36414 42598 36602 34631 35557 39142 41715 34115 34809 42074 43126 34586 33523 39532 33100 35128 34944 41906 43031 34200 36709 37443 40776 35094 36335 40739 41149 35751 35880 37148 40775 36212 37076 40617 40392 39346 40978 38013 42483 36068 42496 39906 34200 39680 34072 38534 40962 42331 37620 43117 35191 33317 41170 40523 33986 37858 39363 38660 34853 33891 40824 38429 35944 43472 34172 40997 38632 36715 40684 35976 36897 42800 39021 35940 41472 35789 42189 37240 34743 39673 35124 38689 40564 41152 39072 40448 43520 38192 36624 38148 39360 34134 38555 39673 35466 36816 41136 43256 38556 40162 35993 36405 41110 35392 36250 39528 35481 42840 40976 40704 35306 39888 38037 33506 41010 37763 35330 39018 38851 33488 41039 35991 38072 39248 36478 32928 41009 39161 35470 39448 40256 34064 42521 42208 36864 37585 37782 41447 41561 43142 34221 37784 37360 35270 33582 31363 40946 37297 36534 32390 34320 34060 41804 40340 41536 35296 37390 35302 41728 36135 35803 35755 38870 40278 40860 41356 36596 33735 34205 35419 38677 40256 41606 33048 35352 37552 37019 40036 42200 41648 36517 37789 42832 42167 43576 34294 37781 36885 37986 42912 42651 41696 39560 36976 36459 36280 40880 40988 41260 33145 39527 33650 35432 36615 37095 38981 41760 42071 36012 38656 38976 33517 43145 40741 41936 36024 35866 36055 40343 40449 40768 41193 38935 35506 36357 42664 38017 40096 42297 42842 39127 38276 36381 35702 39460 40697 41415 34361 36407 33624 34292 36297 35913 40935 42549 37719 39233 37067 35042 36697 36416 42556 38618 40403 41158 33730 42315 44388 36841 36153 36267 36736 33290 40140 33640 35232 36305 36529 35463 42437 38643 37818 34897 33326 35322 34025 34757 34616 42487 35456 35027 37486 34873 42619 35232 34392 35080 36893 43044 41074 37464 39008 36481 32989 33301 40407 37504 42816 39500 40428 36841 41952 41639 36812 33452 38168 37064 38024 41264 42687 38192 36022 35106 35237 42745 40977 33552 37869 41813 40720 35052 38637 37590 33565 33911 33268 40040 34664 38515 35714 38466 35456 36133 38536 42664 35127 36183 41471 35173 34609 38912 34555 39540 33978 48679 39499 33460 36929 41984 36090 37210 36554 34400 35633 33355 41088 41313 38720 40128 42196 33088 39922 40761 41612 42830 40818 33792 40817 42864 39605 35990 36487 42353 37266 37788 35832 34962 35168 38217 37674 37012 38104 34353 37666 35745 39606 42699 37408 33143 41393 41856 37568 33632 41127 41909 37578 32711 40919 41424 37395 40566 41480 40820 37677 41416 40376 42256 37433 33632 39852 40139 38510 42128 41671 42368 38318 35576 38887 34828 41975 36954 36352 38282 36946 35665 35879 38144 36765 34438 36087 37224 36007 33689 37607 36196 35687 41793 38903 34828 38408 41069 40038 33134 37985 42848 38966 35139 38233 41884 39898 41869 42456 34458 40641 40032 42870 40237 38370 32908 40374 41166 37180 33266 38181 37400 38093 36555 33766 37560 34779 42507 38792 35193 41418 41571 41094 40482 43784 38738 36248 36113 33722 33385 39692 36667 40757 41067 40867 40352 34490 33386 36407 41522 32923 41823 34956 35584 39570 41160 40835 37016 40044 37570 42592 41576 36614 35328 33314 35479 33590 37058 40577 37337 34944 37751 38888 37616 40257 40367 43092 34845 36896 40567 41741 42584 34411 29985 39190 40289 34868 41123 37600 34296 36520 38551 41536 36785 36113 37184 37460 36954 33513 41606 42868 36416 37880 33913 40306 34347 33528 38528 40513 38850 37312 35872 35312 37792 41230 41588 41834 35969 38087 33792 38233 39489 33880 37376 34343 35512 38066 34392 42795 41024 41975 40420 37294 36135 42480 38259 39719 41462 34965 36885 34432 38523 41798 43064 42240 41609 35919 33933 35239 42115 41620 38291 34861 35232 37997 37329 41234 40083 42670 38244 38359 35767 42695 39939 41478 42944 41832 38669 35593 37131 33173 42514 40594 38257 37303 35060 36784 41925 41552 38827 35602 34248 35944 40640 40996 37264 35692 35658 36486 40037 41555 39979 35125 35864 36300 40601 41974 38656 35543 35906 37700 34840 33947 40231 41939 37233 38715 37003 34731 39251 34896 35863 36952 40297 41300 37604 34967 35824 38477 38572 33221 37430 36794 33609 36386 42032 38368 36370 37290 35512 41360 37078 42688 36037 36827 36913 37219 39968 42231 34549 36909 34910 36163 39793 37138 42688 35547 41876 33452 42576 37300 40823 34322 42922 33871 33968 33853 38936 42708 40805 35470 37285 37172 36185 39825 35462 41984 35584 35654 38912 37477 37340 37986 37026 33401 36416 36865 40888 34548 37547 42035 34327 40595 34424 43608 42433 40962 42547 38456 40327 34621 35874 38291 35611 43008 37328 40989 42706 36336 34210 39185 42357 38219 38578 33341 33611 38076 34112 34099 35714 41088 41701 40046 36921 38528 40876 42665 34129 35553 42544 41457 42912 37075 37328 40505 40539 37430 34311 40738 40572 40273 38834 37280 32607 37773 36866 37231 40585 41897 37145 35072 34428 38424 35072 36112 41629 43119 33432 35664 42783 41642 39712 37250 38746 40886 41472 36945 34472 39340 40614 39268 39200 35240 40389 39456 36624 34746 32704 43744 33568 36236 41607 40380 33298 34890 37218 42074 42151 38411 42284 42173 41760 35848 36280 42541 33292 36263 34211 41263 40832 35968 38487 40131 40416 39591 34832 41008 40984 37796 38529 40969 37860 35596 34486 40079 37224 35609 34703 41828 37042 36025 36565 41728 35483 39252 43958 38665 40688 41691 40308 35184 37401 39192 42812 36908 39424 42194 41384 34705 40720 36698 41533 37744 39130 34187 42887 34449 38602 38525 41663 40084 41521 42882 35424 37699 36219 40984 38419 40448 34400 33644 36504 37942 42755 35893 40960 38697 34845 34247 38505 33204 34534 39193 39611 41350 36325 37169 37817 41004 39236 37394 34446 33626 38688 34282 33751 37015 42464 42726 37254 43084 41205 40553 38964 38720 37572 42256 37394 36424 37807 40282 41489 38528 36226 42212 38549 36498 36514 40196 41879 36560 35355 42418 39837 34931 34000 33604 42224 40102 39844 33827 40736 40300 38958 37453 38912 41032 38414 36103 37287 41975 41991 35580 37064 33288 41072 41049 37586 37344 41971 40054 36500 34483 40042 40334 38960 38061 38210 41708 36648 35351 36672 41143 41731 37925 34388 33286 39904 36898 33982 33296 43096 34392 38166 33135 40693 41161 36520 37856 41186 41670 38992 33541 40139 40661 38465 40276 35862 39168 35273 38912 35944 35621 42336 36663 35720 37905 42912 40147 39160 33360 38272 35054 40682 40438 37536 41415 41054 34480 35127 34433 39899 42456 37258 41444 36392 36337 39073 36016 40984 40760 42583 39003 38578 37832 39734 36046 34040 34893 38166 36630 42957 41450 39400 42496 35015 39069 33014 33163 39947 37768 41958 35269 36871 38379 40567 37517 39639 34255 41169 36919 36406 32868 33381 41610 37641 35177 36676 37557 35392 34056 35079 42628 35107 36634 33565 39040 33523 34614 36962 42060 40434 36968 34960 38822 40048 39893 38544 37259 40329 37142 35840 38136 39817 40007 37495 37270 41794 37833 35976 36274 41849 42608 36396 36687 32921 36806 36714 35986 41504 41771 36982 35597 34028 39008 30192 39184 39703 38512 42170 32515 33323 37560 35072 45837 35541 37179 42069 40032 34816 42205 40576 39341 37985 38168 40694 36864 36584 37920 40305 40736 31826 32889 37304 35930 39852 35677 36096 43139 40608 35929 46416 43782 36083 40764 39954 41931 34460 41353 40864 34221 33908 39911 37441 41472 36391 42408 42609 37234 35911 33664 40800 39450 36632 41650 40011 38103 37944 41959 41120 35876 38247 37353 38336 42419 38740 42242 34385 37490 37424 36161 32860 36468 41287 42928 33798 33752 32839 37536 37739 36279 42115 38379 38092 40920 43182 33927 33763 41927 37536 35604 37901 41047 41172 37580 33993 40237 38878 36976 35948 34736 42817 39419 32730 40353 39630 41840 34595 35155 41047 40248 35824 41699 41272 41739 44118 37208 35964 35584 38963 35635 34273 35424 42624 41674 37159 35965 37360 39978 44112 36201 35715 42185 41248 33427 34819 36384 42465 40409 37357 36696 36672 41600 41985 37172 35506 41905 41894 42503 35896 38600 38576 41400 36845 37089 35784 41840 43357 40329 36691 33357 42019 36194 34475 43314 39015 39979 43928 33468 39363 38148 42087 40870 39864 38160 36595 41120 36898 36885 39202 39272 37360 33408 37111 37166 39714 41148 35154 35765 41430 33992 35853 37137 35042 38224 42413 40320 35973 33610 34181 39424 42350 37364 39221 34132 37554 38258 34507 35588 39232 33543 38471 38144 35217 34219 36768 40801 41697 36539 36075 36049 41345 42687 36128 34039 33024 40613 40128 40082 37632 35661 42805 41024 42441 37168 38432 38845 42372 38752 35450 34056 35776 39216 42832 38740 35048 34902 35320 41610 40284 37008 36313 38377 40114 42320 33498 37075 42448 41602 39430 42551 36864 34357 42164 41127 41857 39392 36104 36229 41418 40296 42722 36854 37963 36663 41493 38933 34892 35172 37136 40086 41072 37173 36422 34215 38208 41512 40696 36963 38164 39008 42756 36872 35328 42208 43492 38091 37408 37824 36627 35029 40349 35458 40784 35649 37241 42987 43378 37824 37128 38921 37070 42710 42896 39802 33208 36262 38153 35097 39205 41608 37928 38721 42808 33546 39259 42544 36737 40508 43210 36184 36971 36676 34376 39741 37312 34372 37654 35864 33601 36234 40216 42144 35985 36864 34076 35074 41814 41831 38979 35944 35696 41761 41713 36055 35728 41680 40898 41578 36864 37546 38741 41137 37696 35851 36264 41963 42981 33527 36151 33138 41658 40864 39613 36841 36840 34240 38672 35972 35447 36904 40684 41832 38307 34669 37656 39898 42832 36108 35805 42233 41164 40363 39144 37666 38101 41625 37056 36006 34388 35728 42551 42119 36393 33601 40356 40664 39495 36264 34576 41851 40177 33241 34978 39385 41365 38048 35001 39872 42084 34149 39017 39032 35098 36563 41030 32984 42280 35557 38710 33437 41048 36743 36423 40104 38249 38039 32633 42600 34935 34785 34400 40351 39584 40689 44184 33400 34184 41272 34435 35523 36981 38054 42688 39665 39251 42753 41788 38300 35776 34192 38100 39432 41696 36260 37383 34133 33891 41314 42828 35811 35568 38275 41725 43184 34669 36707 42416 40245 40711 38914 38925 36085 41891 38851 35808 33495 34905 42340 41361 38283 33937 40506 40672 39389 37254 35388 37659 38192 35785 33170 38320 41016 37901 32230 39788 39840 40928 37959 37677 39255 34992 39552 39861 38016 34148 39388 35340 37680 37728 32986 33383 35028 32964 40048 40995 41796 41542 41703 41379 35744 38518 36395 36392 39618 33938 38693 38832 35012 33529 42627 37235 38962 41863 38919 40146 39281 34520 43634 37948 41639 36695 37671 34604 37575 34113 39440 41145 39616 37640 38199 32231 34105 41773 40339 32435 36264 37170 41728 41464 37205 41512 40144 34336 40908 33941 34521 39559 34432 35948 38880 36338 34310 36870 36836 42361 39398 37416 33570 35379 36428 33120 36941 41344 41307 36412 37424 34470 36690 39593 41799 37012 37101 33928 37037 41049 41618 36743 36308 34360 34972 41440 42659 37160 36519 34325 37083 39852 42062 37304 36592 33495 35757 41235 40621 37433 35858 34711 35649 40618 42176 38464 35415 37056 37161 39664 41756 38405 35751 35948 36056 40916 40960 38037 35939 34039 35768 41248 41164 38722 33577 35687 37083 38676 33347 37042 35350 33725 36812 41196 41975 37888 35061 33036 36447 41072 42316 40049 42450 37314 40836 43285 40533 43155 38197 35560 35759 39984 39696 34395 33189 40520 44153 39896 42667 
24428 22894 24104 22962 23378 23500 22379 24497 23117 23149 24551 23060 24128 23824 22772 23584 23315 23555 23573 23079 23956 23307 23334 23920 23454 23712 23744 23157 23676 23107 23754 23268 23335 23755 23650 23461 23735 23028 23823 23163 23719 23163 23312 23624 23453 23300 23961 23032 23855 23538 23461 23495 23872 23087 23799 23005 23993 23011 23499 23640 23434 23443 23838 22914 23992 23324 23455 23335 23383 23396 23598 22911 24064 23361 23718 23465 23569 23442 23587 23315 23714 22912 24081 23003 23517 23657 23501 23376 23815 22980 23714 22954 23719 23171 23312 23714 23476 23218 23920 23180 23894 23489 23414 23440 23331 23533 23540 23007 23969 23181 23725 23828 23208 23672 23501 22807 24012 22420 24260 22860 22976 24523 23081 24117 23474 22743 23861 22474 23990 22918 22848 24458 23082 23906 23585 22776 24113 22813 23570 23113 22613 24531 23162 23867 23237 23500 23179 23300 23757 24322 24928 24005 24393 23866 24660 24429 24508 23990 24313 24290 24874 23930 24259 23848 24758 24400 24412 23860 24285 24026 24945 23925 24249 23755 24721 24357 24322 23796 24523 24242 24671 24000 24278 3252 15461 16284 17220 17632 18470 17808 18297 18337 18980 32662 28292 26647 26842 25568 25655 24826 25600 25113 25041 24345 25054 24711 25235 24285 24813 24816 24661 24021 24453 24529 25111 24153 24421 23898 24977 24485 23953 23944 24769 24218 24644 24000 24551 24441 24485 23853 24392 24368 24996 23936 24139 23973 24683 24177 24424 24057 24890 24001 24182 23827 24647 24344 24357 23962 24777 23945 24058 24053 24557 24036 24163 24170 24847 24401 24197 24005 24576 24020 24048 24228 24719 23872 24255 24587 24192 23691 24603 24172 24013 23353 24840 24380 23896 24076 25393 23657 23893 25123 23848 23123 25040 23903 23323 23994 25032 24134 23685 24779 25135 23655 24207 25184 24263 23335 25275 23641 23312 24788 24028 23080 24495 24462 23620 23575 24624 24010 23517 24719 24280 23408 24875 24460 23559 24545 25223 23852 24297 24576 23878 23957 24308 24066 23746 24605 23858 24035 24389 24011 23661 24486 23919 23820 24295 24025 23688 24249 23832 23733 24180 24046 23613 24441 23804 23800 24195 24066 23558 24449 23793 23854 24108 24201 23629 24405 23799 23784 24115 24276 23629 24432 23669 23854 24215 24264 23639 24055 23921 24038 23683 24353 23626 15063 17832 18678 19345 19612 19171 20099 19564 19920 20261 28103 25861 26234 24872 25153 24931 24985 24417 25101 24037 24824 24364 24311 24330 24587 23855 24709 24034 24263 24115 24240 23872 24411 23735 24332 23979 24278 24024 24325 23517 24673 23744 24045 24202 24240 23640 24571 23730 24030 24195 24128 23771 24586 23885 24368 24103 24024 24007 24301 23638 24448 23530 24395 23895 24045 23893 24171 23445 24582 23651 24107 24152 24380 23833 24576 23793 24361 23936 23947 23920 24374 23556 24477 23737 24071 23865 23818 24100 23916 23618 24522 23857 24038 24103 23897 23979 24205 23490 24244 23491 24192 23652 23832 24175 23424 23735 24334 23297 24320 23937 23645 23873 23682 23995 23876 23127 25002 22873 23905 24464 23311 24448 23838 23518 23967 22774 24936 22752 23784 24778 23402 24582 23531 23560 23831 22830 24950 23373 23650 24752 23416 24567 23648 23691 23588 23049 25015 23338 24649 23426 23296 24128 22912 24879 23717 24130 24232 23156 24373 22756 25009 23526 24680 23532 24231 23679 23729 24177 23516 24286 23414 24216 23636 24030 23861 23721 23734 23621 24155 23848 23986 23717 23938 23692 23644 24231 23419 23982 23390 24218 23799 12503 18637 20240 20167 20855 20971 20634 20928 20960 21376 28553 25984 25251 24677 24527 24235 24724 23879 24481 23696 24563 23883 24433 23958 24188 23704 24108 24019 23897 23710 23783 24129 23864 23861 23784 24144 23920 23959 23860 24097 24140 23853 24172 23717 23962 23616 24445 23419 24206 23282 24531 23492 24359 23351 24464 23665 24280 23340 24483 23432 24262 23342 24400 23655 24218 23406 24253 23323 24297 23371 24323 23329 24325 23303 24487 23598 24345 23449 24407 23501 24256 23264 24437 23409 24109 23316 24352 23386 23879 23562 23993 23730 23854 23600 24048 23686 23879 23611 23924 23824 23532 23689 23799 23867 23929 23708 23617 23922 23749 23824 23729 23921 23736 23762 23616 24015 23638 23593 23819 23733 23835 23388 24120 23433 24320 23531 24125 23316 24327 23388 23985 23392 24070 23549 23833 23826 23748 24027 23723 23674 23804 23741 23872 23944 24178 23013 24740 22876 23612 23932 23600 24135 23468 23913 23185 23834 24274 23399 24521 22681 24583 23784 23639 24230 22896 24772 23270 23284 24538 22617 24768 23413 23416 24352 22843 24651 23142 23269 24406 22697 24901 23085 23400 24356 22768 24632 23481 23394 24517 22697 24313 23868 19292 21429 21040 21974 21880 21766 21975 21861 22119 30822 25208 24678 24256 23927 24352 23752 23687 24070 23588 24313 23536 23702 23958 23615 23951 24000 23541 23847 23637 23773 24029 23720 23872 24075 23316 24136 23605 23784 23621 23879 23450 24379 23280 23767 23759 23558 23603 24099 23421 23905 23586 23681 23847 23893 23557 24076 23424 23844 23899 23634 23335 24088 23128 24124 23642 23821 23458 24048 23137 24320 23303 23481 23592 23746 23366 24208 23101 23716 23719 23664 23808 23691 23469 24178 23205 23986 23832 23552 23264 24169 23115 24135 23438 23873 23388 24037 23056 24168 23516 23666 23380 24017 23088 24247 23365 23770 23497 23962 23162 24247 23400 23752 23485 24053 23145 24234 23172 23735 23652 23572 23540 24201 23206 23717 23661 23686 23319 24262 23418 23752 23448 23923 23233 24201 23188 24202 23579 23805 23239 24135 23619 23606 23388 24080 23129 23799 24111 23303 23489 24077 23205 23337 24593 23368 23403 24405 23081 23190 24716 23343 23351 23928 23419 22975 24472 24098 23169 23847 23721 22752 24535 24016 23051 23364 24196 23172 23035 24849 23543 23136 24041 23828 22647 24342 24223 22945 23143 24373 23248 23397 24041 19881 22048 22235 22957 22226 22851 22973 22523 22642 22991 24762 24037 24099 24022 23332 23572 23729 23468 23356 24114 23650 23563 23391 23951 23402 23490 23799 23912 23202 23643 23620 23432 23362 24129 23426 23703 23280 23976 23192 23740 23825 23849 23325 23756 23596 23450 23461 24128 23079 23634 23335 23973 22997 23644 23610 24116 22964 23650 23468 23856 23085 23876 23744 23589 23192 23686 23532 23614 23004 24045 23733 23482 23623 23768 23447 23516 23504 24098 23006 23205 23290 23984 23060 23652 23733 24036 23047 23624 23495 23753 23047 24064 23584 23525 22512 23885 23468 23421 23210 24181 23073 23669 23274 23961 23337 23417 23452 24180 23299 23532 23271 23880 23362 23471 23616 24074 23211 23535 23274 23981 23226 23541 23677 24103 22990 23509 23260 23915 23320 23437 24111 24276 22700 23340 23465 24301 22916 23088 24240 24683 23164 23208 23043 24141 23847 22681 23883 24686 23095 23196 23070 24192 23453 22565 23556 24752 23278 23093 23049 24234 23281 22581 23923 24725 23239 22976 23058 24104 23631 23001 23626 23801 23775 23063 23467 23637 23579 23158 23808 23792 23296 23254 23506 23548 23208 23536 23984 23168 23669 23307 23908 23112 23658 23691 23706 23015 23636 23517 23277 23363 24049 23338 23543 23188 23870 23375 23404 23380 23990 22938 23590 23339 23798 23003 23814 23659 23699 23119 23607 23386 23848 22951 23860 23616 23609 23257 23725 23527 23469 23309 24057 23447 23537 23080 23952 23063 23568 23545 23955 22869 23620 23303 23975 22905 23832 23607 23341 23751 23761 23388 23456 23537 24052 23073 23744 23169 23971 22964 23623 23622 23960 22944 23630 23343 23808 22924 23741 23728 23541 23074 23569 23546 23541 23044 23980 23525 23377 23129 23701 23306 23368 23520 24039 23019 23463 23220 23947 23152 23360 23635 23987 22873 23445 23492 23832 22598 23564 24367 23604 22745 23191 23837 24025 22487 23270 24528 24153 22614 23206 24133 23457 22464 24167 24436 23296 22926 23292 24114 23205 22456 24500 23799 22883 22423 23769 23864 22628 23066 24442 23424 23072 23429 23559 23587 23004 23724 23783 23383 23463 23440 23712 23170 23569 23812 23240 23333 23328 23747 23151 23400 23684 23812 23032 23535 23512 23332 23125 23876 23687 23397 23276 23510 23516 23453 23041 23991 23483 23321 23154 23744 23385 23276 23309 24179 23159 23540 23073 23916 23095 23722 23543 23811 22972 23524 23304 23863 22887 23607 23676 23815 22953 23552 23420 23746 22790 23947 23499 23469 23123 23573 23384 23655 22940 23845 23677 23501 23089 23639 23424 23552 9207 16343 16713 16457 17417 18168 18127 18328 17994 19047 29530 26679 25121 25542 24869 24711 24633 24992 23845 24367 24125 24554 23673 24252 24320 24164 23669 15826 18449 19307 18901 20257 20247 19459 19834 20437 20644 26791 25474 26496 24935 24125 24072 24896 24515 23281 23977 25368 23489 23781 23912 24714 22903 23988 19798 20176 19938 20451 21418 21518 19975 21521 22387 30803 25880 24770 24957 24055 24188 24393 24308 23721 23939 24075 23806 23700 24298 24087 23786 23655 24234 20135 21045 21671 22131 21520 21884 22105 21831 21787 28022 24866 24484 23896 24545 23616 24052 24075 24179 23508 23965 23903 23948 23338 24221 23934 23767 19712 22608 22393 22617 22656 23415 22583 22876 22481 23244 24626 24345 24188 24139 23553 23975 23777 23854 23356 24318 23588 23811 23432 24204 23251 23914 23905 23939 23432 23949 23609 23730 23504 24421 23543 23743 23400 24135 23191 23917 24009 23689 23349 23836 23742 23605 23653 24205 23276 23456 23560 24017 23243 24081 23872 23630 23842 23973 23576 23233 24461 23832 23143 23543 24194 22740 24432 24299 22912 23393 24173 23314 22834 24861 23640 23124 23200 24480 22801 23305 24684 23786 23063 23777 24176 22665 23969 24658 22957 23043 23808 23416 23501 23847 23649 23696 23714 23568 23344 23747 23938 23143 23591 23714 23590 23409 24149 23266 23628 23636 23644 23469 24117 23364 23585 23382 24002 23041 23831 23865 23584 23308 23727 23580 23497 23629 24040 23015 23680 23607 23504 23256 24223 23120 23957 23497 23710 23170 24102 23591 23664 23403 23809 23070 24100 23343 23648 23235 24083 22997 23787 23680 23593 23544 23859 23429 23536 23613 23810 23081 23739 23489 23403 23399 24113 23083 23731 23534 23351 23490 24072 23048 23628 23569 23605 23113 24120 23337 23557 23315 23885 22976 24001 23372 23721 23400 23792 22780 24337 23536 23236 23197 24261 22456 24128 24182 22954 23139 24162 22405 24491 23767 23151 23301 24192 22420 23914 24272 22849 22952 24298 22456 23900 24399 22839 23259 23843 23095 23572 23712 23136 23477 23629 23154 23621 23869 23040 23342 23640 23422 23158 24014 23164 22784 23450 23499 23044 23947 23453 23484 23248 23791 22984 23768 23592 23360 23150 23873 22912 23815 23697 23429 23189 23744 23393 23312 23349 24076 22956 23296 23203 23847 22832 23761 23634 23450 23092 23678 23302 23430 23447 23987 22933 23595 23368 23629 22995 24028 23188 23451 23162 23849 22936 23779 23526 23584 23101 23625 23457 23411 23427 23936 22924 23541 23416 23636 22983 23925 23421 23360 23110 23736 23283 23361 23620 23930 22979 23608 23545 23319 23233 24111 22956 23528 23273 23939 22621 23881 24227 22839 22947 24246 23079 22907 24405 23832 22809 23255 24103 22834 22822 24633 23431 22906 22966 24407 22438 23460 24506 23237 23056 23429 23987 22493 23874 23751 23118 23216 23700 23159 23316 23751 23402 23259 23325 23574 23289 23312 23874 23221 23552 23239 23722 22922 23640 23593 23219 23247 23735 23069 23430 23590 23447 23513 23653 23399 23269 23475 23808 22972 23363 23381 23563 22944 23910 23373 23412 23043 23861 23158 23349 23445 23848 22883 23528 23464 23420 22896 23975 14016 15977 16820 17647 17542 17756 17900 18739 17732 34300 27616 26345 25092 25744 24598 16309 18405 19847 19047 19927 20144 20307 19713 20212 20343 27522 25854 25970 24534 24720 15709 20066 20362 21369 20851 21296 20979 21589 20724 21697 27551 25564 24716 25018 23766 24852 21427 21009 21429 22785 21256 21699 23136 21675 21483 27702 24960 23997 25379 23869 23553 22402 22605 22013 23689 23552 22062 22528 23444 22781 21962 25455 24268 23512 23768 23916 23569 23657 24261 23376 24114 23783 23617 23417 24072 23683 23751 23616 23853 23195 24090 23556 23634 23369 23985 23158 24010 23660 23395 23353 23897 23149 24048 23504 23654 23328 23938 23062 24073 23601 23611 23351 23857 22999 23978 23364 23696 23351 23837 23093 24060 23513 23639 23232 24022 22928 24118 23540 23669 23273 23945 22953 24247 23192 23656 23368 23906 23240 24216 23296 23895 23344 24015 23108 24127 23594 23762 23313 24060 23172 24235 23205 23704 23546 23778 23107 24119 23460 23616 23379 23827 23080 24149 23533 23715 23568 23568 23289 24185 22832 23494 23798 23008 23542 24576 22743 23178 24177 22643 24088 24288 22785 23520 23895 22720 
22876 22551 22437 22421 22589 22301 22800 21693 23463 21988 22569 22723 22528 22423 23071 21921 23027 21889 23013 21977 22520 22433 22637 21877 23315 21848 23059 22281 22564 22310 22528 22395 22569 21788 23260 22115 23006 22465 22360 22383 22487 22350 22724 21721 23281 21991 22560 22897 22478 22222 23904 21444 23047 23018 21570 22890 21557 22682 22221 21045 24020 21650 22594 23632 21726 22692 23063 21341 22965 21417 22871 22052 21127 23555 22196 22071 23760 21481 22887 22577 21958 22602 21829 22983 22114 22159 22888 22232 22560 22653 22103 22658 21984 22675 22160 22201 22643 22503 22123 23234 22168 22760 22353 22262 22324 22313 22351 22471 21866 23285 22135 22767 22470 22292 22461 22759 21906 22925 21697 23145 21879 22651 22439 22464 22427 22765 21837 22836 21746 23068 21980 22550 22544 22594 22351 22952 21647 23058 21805 22786 21938 22618 22694 22320 22339 22562 22176 22671 21738 23312 21484 23162 21737 22991 21984 22695 22480 22392 22116 22169 22645 22105 22497 22397 22538 22440 22247 22720 21775 22735 21639 23169 21351 22737 22595 22028 22513 21642 23489 21903 22299 23164 21287 22701 20835 23948 3808 2364 3008 5195 5632 5373 5383 29824 30361 27255 25780 25114 26440 26375 24283 22961 24695 24142 23837 22474 23454 24736 22542 22478 22830 23173 22681 22349 22176 22828 22631 23000 22199 22453 22871 22503 22132 21993 22542 22903 22118 21875 22199 22625 22439 22039 21706 22457 22240 22492 21602 22444 22565 22258 21497 22461 22192 22560 21625 22359 22439 22204 21543 22368 22125 22376 21589 22756 22332 22058 21556 22838 21851 22297 21450 22674 22196 22251 21780 22799 21701 21820 22068 22407 21508 22056 22001 22560 21435 22576 22334 22928 21591 22931 21561 22005 22216 22458 21317 22556 21776 22412 21425 22706 22111 22244 21832 22962 20951 22066 22165 22229 21410 22920 21678 21976 21849 22572 21444 22170 22119 22532 21290 22791 21861 22132 22075 22933 21413 22721 22051 22230 21647 23029 21743 22140 22305 22189 21190 22716 21625 22159 22155 22493 21301 22721 21613 22027 21963 22594 21293 22817 21980 22307 21703 22580 21402 22400 21868 22003 21960 22514 21447 22672 21863 22079 22011 22326 21607 22265 22039 22103 21780 22460 21505 22338 21885 22016 21956 22471 21491 22183 22195 22263 21525 22599 22081 22007 22208 5393 5973 8681 8411 9653 10819 10929 10823 12193 28725 30151 28226 26280 27271 25543 24213 26681 24107 23840 25383 23347 23525 24889 22442 23895 23916 22229 23691 23458 21781 23731 22676 22036 23367 23190 21624 23461 21959 22578 22711 21647 22677 22682 21131 23380 22128 21485 22538 22513 20992 23509 21934 21457 23257 22197 22651 22823 22398 22582 22696 21964 22777 22266 22112 22530 22294 22522 22403 21885 22967 22245 22071 22752 22128 22162 23069 22283 22679 22551 22280 22151 22888 21792 22776 22162 22196 22070 22023 22435 22348 21826 22841 21995 22310 22665 22318 22225 22659 21524 22668 21645 22401 21921 22149 22477 22816 22005 22829 21644 22756 22154 22274 22134 22134 22073 22432 21511 23037 22076 22592 22187 22130 22225 22508 21829 22578 21504 23061 21354 22474 22275 22355 22165 22442 21868 22408 21412 22917 21760 22491 22391 22162 22245 22390 22024 22424 21741 23177 21461 23011 22036 22337 21696 22190 22351 22440 22148 22656 21590 22518 21372 23130 21556 22775 21495 23019 22045 22399 22432 22113 22036 22177 22272 22592 22032 22646 21704 22517 21593 23205 21433 22861 21572 23021 21740 22643 22261 22153 21827 22176 22410 8917 10471 11937 13207 13553 13968 15499 14701 15879 15159 30071 27521 27385 25513 25927 24405 24921 24396 23855 23624 23389 23632 23437 23290 23232 23077 23158 22985 23313 22648 23025 22291 23557 21814 23014 22038 23914 21645 23335 21653 23883 21916 23431 22044 23096 21934 21961 23660 21676 22529 21388 23831 21624 22999 21239 23760 21555 22983 21265 23867 21789 22884 21219 23515 22103 23016 21248 23664 21879 22974 21203 23671 21307 22656 21184 23680 21801 23024 21288 23724 21466 22567 21287 23655 21317 21941 22127 22673 22503 22095 22437 22240 22449 22443 22483 22178 22712 22336 22493 22066 22717 22081 22377 22039 22703 21959 22231 22267 22804 22049 22319 22073 22669 21991 22094 22312 22437 22415 21955 22757 21980 22908 22047 22825 21699 22941 21674 22587 21780 23008 21876 22542 22312 22276 22424 22455 22176 22309 22496 22339 21964 22823 21648 23150 21824 22663 21946 22803 22432 22487 22294 22260 22393 22678 21930 22962 21520 23236 21545 22544 22119 22281 22548 22389 21993 22494 22044 23041 21632 22571 22063 22273 22560 22179 21695 22647 21970 23157 21716 22599 21835 22683 22460 22442 21960 22862 21684 23268 21568 22665 22256 22376 14208 15079 15851 17413 16685 18670 17384 18476 18279 27548 26805 26272 24519 25111 23464 24084 23446 23563 22968 23283 22778 23767 22235 23097 22695 22712 22907 22821 22397 23185 22197 22849 22935 22448 22221 22983 22044 23392 22216 22682 22434 22510 22279 23303 21760 22529 22576 22375 22855 22592 22003 22869 21912 22337 23329 21776 21371 23176 21323 22956 23348 21480 22067 22957 20939 23889 21869 21929 22669 22057 22027 23874 21329 22023 23051 21205 23066 23156 21352 23136 21428 22473 23640 21561 21813 23137 20919 23553 22955 21633 21856 22490 21489 23909 22182 21872 22568 22249 22189 22693 22601 22029 22553 22190 22327 22797 22208 22234 22620 22144 22167 22781 22280 22164 22486 22224 22616 22671 22045 21991 22800 21739 22688 22665 22103 21897 22797 21960 22230 22629 22369 21953 22515 21727 22626 22691 22356 22055 22607 22071 22235 22423 22859 21715 22487 22372 22253 22071 23164 21786 22701 22193 22482 21913 23074 21660 22967 22038 22474 21780 23268 22004 22743 22043 22708 21598 23077 22016 22586 21991 22770 21619 23146 22347 22343 21250 22877 21847 22560 22464 22535 21894 22561 22369 22231 22240 23109 21508 22432 22224 22576 17421 19476 19077 19613 19367 20817 19436 20897 20645 20711 23840 24682 23433 23320 23096 23856 22244 22976 22798 22839 22086 23339 22681 22400 21463 22929 22419 22240 22467 22904 21880 22570 22391 22551 21901 23190 22498 22222 22028 22936 21929 22418 22899 22208 21833 22587 22396 21425 22280 23918 21805 21551 21667 23151 22150 21108 23048 23839 21088 22128 22314 23137 20894 22148 23591 22837 21063 21736 22515 22812 20860 22581 23640 21960 21464 22803 22229 21085 22593 23953 21897 21697 21857 22991 22381 21892 22750 22640 22084 22484 22553 22487 22003 22280 23121 22137 22195 22192 22706 22020 22434 22656 22821 21858 22376 22025 22776 21920 22219 22506 22883 22049 22535 22382 22689 21744 22486 22674 22767 21816 22460 22112 22696 21541 22603 22531 22842 21703 22587 22247 22724 21609 22598 22505 22943 21504 22896 22063 22970 21653 22577 22299 23185 21830 22504 21856 22967 21831 22421 22419 23168 21808 22464 21879 22993 21863 22441 22345 23114 21598 22574 21802 23071 21661 22317 22344 23205 21691 22596 21975 22754 21973 22304 22115 23247 21625 22582 22096 22961 21466 22825 22456 22789 21853 22747 22297 22387 22003 23053 22235 22231 21785 22880 21935 22260 22608 22713 21842 22474 22433 22486 21771 22995 22545 22297 21856 22575 22296 21991 22545 23168 21568 22307 22208 23242 21462 21825 23498 23336 21081 22024 22206 23177 21102 22087 23631 22461 21248 21957 22924 21903 20919 23244 22426 21362 21610 22945 22104 21236 22977 23815 21381 22048 21976 23086 20882 22816 23616 21905 21897 22522 22604 21636 22429 22634 22661 21929 22279 22381 22428 21807 22566 22790 22359 21951 22418 22548 22087 22096 22918 22417 22080 21933 22665 22136 22119 22297 22983 22010 22135 22164 22631 21589 22555 22543 22809 21673 21870 22091 22808 21709 22862 22532 22292 21831 22494 22308 22599 21480 22902 22436 22519 21517 22557 22128 22744 21539 22836 22420 22144 21997 22640 22318 22337 21731 23015 22144 22442 22021 22697 21973 22234 22001 23191 22026 22201 21872 22946 21967 22067 22296 23252 21828 22403 21810 23110 21528 22502 22447 22865 21591 22616 22095 22421 21856 23126 22080 22370 21774 22791 22041 22216 22239 22987 21716 22552 22140 22773 21604 22454 22636 22896 21665 22409 22197 22725 21534 22900 22691 22127 21639 22448 22621 21575 21514 23857 22713 21357 21614 23155 21588 21237 23077 23729 21324 21818 21772 23197 21497 21372 23303 23360 21133 21930 22057 22811 20958 22295 23671 22762 21292 22023 22548 22643 22074 22030 23005 22515 22159 22177 1837 6085 7409 8105 10396 10587 10759 11328 12105 12411 31852 30746 30168 27931 27292 26482 26439 25018 25576 25281 24624 23847 24276 24071 24033 23080 24289 8240 10315 11329 13203 13686 14303 14539 16205 15287 32086 30653 30005 27942 27237 26542 26801 25031 25271 24320 25112 23775 24385 24151 24360 23026 23831 23433 12620 13101 15739 16166 16656 16487 17636 17610 18103 29801 29620 27432 26694 25435 26048 24615 24576 24262 24928 23158 24204 23530 23864 23003 24234 23628 14658 14519 16962 17307 17881 18863 19409 18477 19605 19605 28427 26624 26840 25609 24760 24327 24939 23712 23735 24361 24357 22437 23483 23574 23829 21834 24556 19703 18491 19081 20476 21043 19806 20064 22448 21455 20413 24241 25751 23289 23457 25147 24117 22514 23100 23805 23121 22152 24535 23774 22297 22998 23156 23056 22643 23739 22930 22728 22727 23371 22637 22679 23079 23210 22360 22918 22955 22718 22487 23568 22725 22855 22489 23252 22116 23000 23220 22996 22284 22935 22656 22728 22400 23422 22226 22921 22489 22923 21901 23430 22542 22665 22277 23089 21884 23265 22788 22533 22262 22987 22221 22546 22686 23460 21816 22768 22445 22803 21760 23528 22294 22676 22104 23137 21825 22787 22791 22586 21837 23015 22181 22813 22676 22761 22130 22928 22456 22400 22401 23332 21853 22691 22584 22658 22613 23288 21840 22592 22577 22601 21919 23321 22312 22590 22081 23117 22052 22585 22954 22653 21945 23058 22329 21634 23458 23331 21348 22226 23128 21508 22386 24110 21523 22573 22964 22247 21249 24045 21785 22081 22553 22193 21461 23953 22692 21648 21896 23318 21222 22252 23021 22027 22617 22246 22633 21959 22987 22792 22231 22250 22715 21915 22948 22296 22368 22119 22835 21855 22697 22628 22169 22170 22753 22108 22524 22736 22693 22110 22741 22044 22289 22792 22795 22068 22683 22247 22393 22395 23050 21800 22632 22249 22379 22289 23145 21810 22701 22409 22336 22512 22886 21734 22701 22308 22340 22232 23184 21686 22599 22330 22355 22217 22853 21917 22504 22166 22378 22382 22876 21596 22661 22222 22408 22016 23019 21570 22737 22302 22551 22029 23285 21856 22677 22275 22688 21729 23131 22216 22449 22112 22944 21624 22870 22538 22253 21964 22841 21504 22424 23316 22200 21595 22416 22880 21288 22330 23990 21895 21878 22016 23195 20956 22919 23648 21595 21586 22799 22656 21063 23113 23449 21168 22124 22603 21667 21648 23498 22542 21843 22450 22498 22190 21993 23074 22513 22064 22226 22692 21856 22631 22872 22178 21970 22644 22280 22098 22503 22878 21865 22368 22274 22679 21670 23086 22243 22363 22005 23004 21957 22379 22539 22826 21763 22606 22288 22279 22256 23261 21681 22897 22088 22775 21559 23037 22309 22324 21940 22909 22128 22377 22372 23113 21513 22643 22108 22563 21671 23192 22152 22438 21929 22959 21632 22694 22489 22349 21821 22981 21839 22483 22381 23044 21598 22512 22373 22418 21895 23088 22225 22370 21962 22934 21671 22608 22538 22264 21984 22798 21943 22560 22536 22434 21799 22432 22224 21939 22771 23451 21052 21921 22568 22553 20992 23642 23141 21437 21719 22900 22242 21017 23094 22961 21138 22019 22503 22660 3555 7940 10268 9449 10566 11709 12912 11557 14016 34619 32079 29911 29605 27760 27270 11681 13159 13552 14796 15781 16042 15949 17392 17255 33015 31895 30962 28512 28557 27279 14365 15360 17085 16964 17869 18544 18861 18407 19325 19192 30368 29345 28439 26349 26589 17962 18023 18635 20230 18945 20270 19933 20647 19940 21408 27888 27511 26169 25988 24810 25772 20393 21412 21127 22055 20915 22245 21847 21856 21276 26200 25065 24680 24507 24744 23273 24128 23621 23630 23127 24299 22848 24053 23217 23623 22538 24033 22658 23376 22839 23467 22332 23720 22960 23163 22741 23284 22218 23632 22688 22940 22640 23192 22152 23572 22453 22649 22681 23041 21789 24272 22328 22234 22736 23182 21722 24341 22059 22395 22966 22761 21394 24208 22624 22080 22729 22827 21344 24146 22115 22199 22753 22088 22379 24417 22323 22391 23047 22723 22664 23087 22823 22499 22956 22768 22508 23124 22983 22537 23024 22427 22816 23077 22744 22377 23051 22397 22583 22956 22912 22215 22853 22284 22400 22743 22579 22095 23045 21951 22866 22668 22264 22020 23060 21828 23056 22517 22432 21977 23141 21685 23243 22439 22662 22141 
