# Supplementary material for: An Active Feature Selection Strategy for DWT in Artificial Taste
Source: Hindawi journal article supplement (doi:10.1155/2018/9709505), 2018-01-01
Supplement: f1 [file 9709505.f1.zip › beer-low-2.txt]

43475 43472 43664 43478 53 11791 18006 19936 21117 22085 21776 22321 22616 22521 22157 23032 22292 22838 22829 22473 22669 23169 22160 23136 22860 22848 21931 23275 22375 22854 22823 23394 21888 23153 22628 22784 22544 23588 21948 23180 22481 23216 22120 23594 22670 22779 22315 23427 22218 22914 22690 23454 21889 23182 22473 23299 22151 23650 22833 22847 22835 23334 22516 22916 22775 23692 21975 22567 22562 23155 22130 23677 22791 22832 22240 23187 22538 22757 22760 23684 22324 23063 22548 23229 22127 23280 22931 23081 22230 23063 22732 23068 22272 23860 22915 22221 22358 23115 22784 21975 22524 24307 22424 22125 22269 23527 22942 21757 22850 24245 22289 22038 22311 23458 21944 22128 23828 23890 21853 22306 22886 23335 21650 22262 23527 23030 22694 22528 23126 22969 22725 22710 23426 22902 22725 22464 22937 22940 22682 22612 23554 22663 22901 22343 23358 22737 22761 22848 23604 22540 23006 22349 23478 22359 22800 22706 23648 22118 23485 22509 23283 22109 23453 22880 23304 22149 23106 22565 23069 22208 23665 22778 23052 22427 23450 22165 23281 22906 23313 22024 23298 22575 23040 22341 10752 15623 18330 18572 20297 19611 20407 20339 21380 19910 31337 26080 25721 23393 24716 23569 23490 22861 23640 23023 23095 22981 23936 22640 23098 22602 23485 22491 23050 23221 23351 22228 23192 22938 23280 22295 23276 23207 22838 22263 22976 23285 22216 22558 24241 22597 22167 22260 23632 21944 22349 23864 23637 21750 22564 23317 22565 21523 23657 23960 22061 22404 23004 23067 21764 22752 24391 22260 22439 22743 23075 22774 22503 23673 22912 22651 22666 23160 22968 22609 22720 23524 22848 22775 22649 23354 22404 23127 23168 23021 22435 23017 22861 22860 22376 23665 22848 22824 22272 23264 22509 22939 22876 23536 22145 22954 22465 23353 22088 23597 22959 23163 22425 23475 22464 22928 22744 23767 22037 23649 22688 23348 22120 23493 22905 23049 22528 23463 22490 23050 22968 23430 22035 23248 22756 22934 22272 23818 22414 22994 22340 23595 21933 23504 22919 23056 21767 23475 22407 22988 22936 23496 22101 22436 22813 23003 22276 23445 22810 22793 22412 23256 22656 22767 22733 23718 22218 23106 22585 23374 21996 23651 23562 22155 22097 23191 22898 21735 23005 24058 21876 22421 22392 23441 21481 22950 23900 22051 22184 23046 23025 21708 16947 20585 19553 20210 20859 21934 20640 20592 22496 33286 26377 24647 24486 23023 23600 23608 23394 22848 23139 23135 23034 22529 23545 22840 22946 22610 23409 22795 22952 23247 23301 22417 23200 22848 22919 22234 23640 22774 22826 22363 23508 22349 23127 23001 23549 22114 23238 22614 23376 21977 23701 22759 22964 22359 23249 22659 23176 22273 23715 22790 22985 22249 23257 22746 22983 22391 23719 22400 23009 22261 23524 22087 23168 23063 23338 21985 23360 22617 23062 22202 23719 22636 22940 22260 23491 22565 22941 22868 23735 22415 22967 22484 23320 22384 23012 23056 22931 22312 22984 22745 22876 22577 23666 22139 22935 22577 23519 21768 23760 23399 22135 22141 23224 22701 21706 22741 24226 22328 22181 22291 23380 21416 23032 24069 22843 21756 22564 23255 22685 21592 23665 23920 22035 21959 22720 23158 22240 23338 23036 22760 22426 23172 22631 22575 22947 23456 22420 22837 22688 23160 22247 23466 22953 22752 22727 23288 22708 22851 22851 23499 22311 23063 22570 23289 22121 23561 22917 22982 22319 23122 22599 22800 22448 23786 22384 23185 22344 23547 21917 23392 22957 23059 22262 23257 22605 22942 22465 23758 22105 23110 22397 16067 19101 21750 21463 21856 21605 22304 21792 22198 21687 27653 24200 23897 22797 23735 22481 23141 23066 23468 22231 23033 22671 23417 22216 23370 22999 23192 22359 23136 22818 22948 22614 23748 22517 22928 22574 23356 22403 22502 23463 23582 21728 22719 22865 23283 21521 23922 23757 22157 21958 23278 23097 21781 22665 24320 22321 22283 22510 23435 21614 22682 24137 22016 21651 23441 22588 22328 23373 23041 22736 22540 23309 22375 22952 23258 22605 23072 23192 22592 22821 23168 23233 22263 23112 22790 22869 22433 23433 22432 23018 22487 23200 22026 23481 22915 22792 22373 23333 22558 22960 22968 23303 22214 23266 22670 22986 22295 23779 22411 23024 22246 23512 22124 23187 22888 23146 22404 23303 22601 23045 22484 23801 22196 23104 22334 23414 21991 23228 22951 22880 22041 23114 22625 23097 22118 23484 22813 23116 22005 23191 22599 22692 22497 23572 22731 22704 22816 23267 22713 22916 22223 23440 22958 23217 22149 23184 22547 23328 21984 23224 23082 23149 21780 22651 22820 23569 21703 22370 23640 24210 21802 22521 22404 23459 22352 21768 22742 24311 22791 21916 22183 23112 23168 21940 21981 23889 23782 22157 22029 22390 23278 22803 20173 21240 22566 22362 22274 21809 22795 22352 22634 26756 24231 23593 23629 22697 23153 22616 23381 22681 22732 22473 23595 22835 22936 22471 23228 22734 23032 22040 23372 22969 23483 22161 23338 22481 23416 22279 23040 22773 23692 22587 22852 22272 23188 22552 23346 21999 23260 22841 23600 22130 23079 22323 23253 22663 23003 21960 23418 22862 23270 22023 22997 22279 23500 22578 22792 22100 23441 22829 23700 22160 23213 22159 23329 22620 23314 22096 23076 22691 23586 22501 22724 22528 23027 22809 23051 22212 22921 22797 23568 22630 22727 22336 22997 22488 23384 22325 22571 22360 23657 23368 22272 21985 22557 22936 23327 21934 21753 22514 24124 23649 22168 22008 22725 23176 22883 21602 22103 23380 24236 23182 21968 22166 22402 22968 23473 22383 21555 22925 23082 23444 22423 22789 22548 22958 22924 23028 22368 22863 22914 23477 22674 22727 22857 23019 22759 22909 22031 23000 22954 23420 22520 22674 22250 23146 22507 23413 22144 23051 22820 23593 22349 22840 22237 23096 22550 23373 22144 22947 22492 23719 22576 22929 22183 23106 22577 23364 22064 23142 22832 23624 22163 22977 22204 23268 22587 23218 21959 23297 22940 23515 22069 20894 21589 22935 21965 22596 21879 23296 22515 22926 21696 23979 22736 23639 22255 22912 22912 23680 22699 22900 22456 22979 22816 23260 22087 22664 22528 23532 22849 22729 22514 23045 22762 23249 21987 22146 22671 24081 23675 22834 21552 22441 22279 23374 23023 22193 21810 23250 24077 23744 22253 21908 22132 22578 22724 23527 22634 21705 22055 24166 23469 22337 21799 22500 22929 22813 23148 22315 22784 22902 23442 23064 22853 22384 22956 22854 23124 22412 22620 22547 23500 22945 23254 22328 23123 22593 23228 22960 22999 22103 23169 22791 23575 22606 22713 22060 23482 22328 23304 22532 22816 22037 23302 22749 23621 22213 22900 22012 23085 22304 23485 22401 22876 22087 23204 22760 23672 22272 22921 22102 23176 22340 23579 22541 22851 22032 23116 22796 23609 22530 22897 21963 22976 22186 23402 22565 23112 22049 22963 22452 23660 22996 23175 22029 22973 22296 23323 22647 22805 22166 23040 22951 23533 22736 22786 22254 23158 22377 23204 22900 23170 22151 22259 23032 24150 23680 23014 21948 22064 22171 22379 22832 23521 22864 22144 21749 23128 23774 24029 22689 21943 22139 22515 22649 23559 22839 22066 21543 22565 23239 24002 23552 22597 22644 22373 22651 22715 23160 22973 23143 22457 22652 22337 22994 23057 23538 22992 22970 22190 22819 22572 23060 22744 23301 22736 22968 22172 23349 22987 23661 22770 22887 22204 23104 22511 23133 22714 23322 22273 22897 22203 23515 22790 23661 22083 22990 21995 23144 22317 23232 22617 23236 22153 22791 22350 23385 22784 23768 22573 23287 22112 22891 22360 23309 22690 23237 22171 22718 22338 23436 22771 23574 22375 22899 22025 22992 22246 23526 22449 22888 21911 23072 22820 23685 22756 22648 22248 22430 22465 23337 22509 22746 22160 23299 22939 23507 22605 22769 22116 22618 22496 23182 22724 22552 21790 23120 23693 23336 21854 21998 22324 22464 22948 23469 22103 21756 21671 23097 23648 24175 23593 22858 21701 22183 22600 22727 23210 23313 22329 21705 21580 22922 23684 24016 23372 22233 22689 22163 22853 22716 23192 22751 22789 22248 22688 22851 23405 22967 22967 22272 22764 22488 23136 22877 23255 22288 22720 22343 23264 22983 23433 22528 22787 22214 22952 22401 23272 22776 22948 22051 23046 22779 23607 22711 23105 22041 23008 22214 23273 22586 23254 21805 23186 22730 23654 22504 22901 22070 22935 22217 23412 22615 23164 22071 23441 22669 23568 22121 22888 22389 23013 22435 23384 22487 22749 22211 23553 22784 23287 21861 23064 22605 23257 22609 23307 22203 22868 22244 23465 22819 23499 14500 18393 18920 20507 20103 21156 20885 21432 20632 39697 27688 26038 24477 24267 22854 23389 22892 23555 23072 23035 22076 22556 23265 24328 23840 23233 21746 16949 19274 20621 21818 22071 20950 20638 20885 22147 33358 27367 24632 22961 22504 22834 23083 23704 22599 22022 22157 23616 24181 24032 22436 22389 22909 10593 19860 21263 22032 21472 21863 21938 22695 22537 22595 27648 24420 23280 23488 23174 23698 22685 22904 22722 23724 23198 23655 22701 22848 22528 23253 22641 17585 20655 22020 21469 22720 22333 23258 22312 22504 21816 26041 23325 23977 22945 23268 22231 23362 22917 23883 22603 23173 22240 23480 22471 23436 22749 23327 19824 22219 22052 23364 22581 23339 22183 22681 21913 23443 23398 23854 22630 23072 22391 23475 22981 23845 22715 23017 21968 23103 22295 23528 22697 23191 21984 22861 22451 23564 23047 23397 22311 22904 22430 23201 22678 23344 22448 22717 22420 23410 22875 23661 22791 22985 22016 23076 22552 23158 22903 23360 22367 22048 21862 23264 23840 23479 21753 22120 22374 22618 23008 23557 22192 21751 22051 23662 23929 23769 22263 21895 22063 22515 23097 23183 21907 21731 22652 24001 23969 23152 22112 22190 22903 22465 23251 22727 22685 22322 23328 23031 23159 22456 22564 22583 22941 22860 23189 22305 22602 22619 23617 22930 23264 22240 23100 22538 23223 22800 23121 22170 22912 22489 23552 22977 23388 22105 22858 22432 23161 22593 23408 22073 23040 22665 23718 22458 22929 22056 23168 22313 23503 22485 22779 22354 23520 22872 23232 22069 23128 22183 23320 22648 23324 22033 22962 22540 23640 22832 23185 21913 22976 22478 23520 22293 22875 22144 23492 22836 23511 22089 22919 22304 23244 22637 23208 22082 23046 22964 23434 22279 22691 22373 23146 22752 22940 22287 23360 22882 23326 22273 22919 22502 23342 22493 22736 22416 23616 23424 22707 21593 22506 22612 23212 21532 21876 23150 24252 22752 22139 22060 22624 22976 23383 21825 22089 23251 24220 22976 21848 22113 22430 22912 23509 22006 21792 22388 24100 23694 22567 22580 22957 23257 22749 22765 22355 23200 23116 23146 22215 22774 22631 23200 22725 22585 22562 23536 22837 22826 22430 23030 22795 23098 22231 22977 22885 23515 22136 23032 22381 23540 22295 22852 22724 23650 22498 22860 22257 23219 22568 22951 22165 23639 22666 22809 22072 23254 22666 22740 22263 23503 22688 22872 22159 23149 22570 22903 22268 23744 22704 22811 22161 23309 22585 22849 22577 23656 22405 22938 22144 23424 22328 23008 22609 23683 22144 22966 22214 23400 22092 22991 23001 23196 22357 22968 22635 22872 22251 23489 22832 22688 22448 23013 22724 22757 22708 23495 22144 22896 22552 23433 21888 22816 23766 23238 21530 22722 23244 22276 21743 24016 23132 21899 22199 23483 22213 21749 23346 23266 21687 22443 23053 22731 21529 23539 23957 22409 22060 22566 23047 22313 23200 22992 22808 22343 23024 22908 22581 22737 23381 22645 22700 22497 23085 22260 23204 22976 22981 22464 22988 22795 22665 22281 23418 22802 22869 22221 23300 22354 22776 22787 23432 22034 22302 22565 23260 21923 23417 22592 22873 22204 23392 22298 22829 22718 23625 21957 5854 16730 19607 19173 21217 20736 21204 20510 21607 20918 31269 26069 25354 23178 23818 23161 18271 19568 21809 21647 22144 21035 22172 21613 22028 32152 26887 24160 23808 23098 23927 17269 20726 21634 22699 21383 22467 22180 22467 21653 22995 25804 23992 23346 23753 22881 17157 21624 23044 20992 22066 22581 22241 21314 23594 23246 24768 23077 23694 23029 22151 23380 23180 21768 21978 22199 22902 21340 22615 23881 22582 24484 23313 23709 22029 23296 23179 23058 22593 23101 22848 23061 22458 23684 22665 22767 22598 23191 22750 22693 23114 23444 22266 22946 22697 23259 22147 23220 23165 22801 22413 23168 22706 22823 22548 23629 22762 22865 22413 23386 22536 22912 22759 23730 22069 23305 22402 23559 21988 23191 22805 23544 22128 23040 22558 23397 22112 23177 22752 23524 22070 23153 22352 23516 22240 22876 22767 23684 22408 22807 22319 23424 22249 22990 22632 23663 22133 23022 22137 23395 22301 22891 22714 23575 22198 22967 22244 23361 22471 22632 22434 23564 22675 22647 22358 23114 22628 22736 22369 23496 22511 22528 22464 23093 22859 22056 22602 24167 23369 22034 22176 22695 22881 21697 22641 
21188 21840 21596 22000 21622 22132 21712 22519 21608 22016 21536 21573 21712 21866 21783 22000 21623 22054 21700 21953 21605 22024 21612 21984 21696 21829 21948 21838 21711 21610 21997 21596 21713 21619 22002 21527 21483 20987 22673 22921 20927 22103 22127 21818 20975 23015 22567 21189 21916 22464 21751 21239 22939 22794 20965 21729 21937 21938 20662 22376 22512 21319 21852 21581 22219 21289 22217 22188 21465 21560 22050 21755 21557 21990 22507 21671 21956 21553 22311 21294 22208 22173 22075 21399 21934 21824 21870 21287 22599 21869 21570 21445 22132 21547 21660 21708 22528 21577 21842 21371 22405 21219 21849 21910 22497 21291 21899 21355 22367 21276 21890 21787 22687 21216 22444 21523 22132 21181 22223 22009 22016 21124 21859 21603 22069 21301 22682 22011 22106 21221 22016 21667 21899 21120 22140 21745 22000 21424 21975 21863 21644 21735 22641 22141 21803 21768 22115 21968 21642 21379 22429 22129 21938 21854 22225 21742 21467 21853 22887 21017 21814 21768 22298 20822 21613 22933 22663 20721 21463 22111 21296 20757 23024 21435 20951 21283 22203 20757 21067 22707 22233 20643 21408 22175 10194 14567 16737 16117 15701 16250 16839 17478 16617 17665 26516 24665 23233 23029 22646 22113 22189 22672 21661 22121 21725 22151 21258 21985 22048 22021 21107 21815 21514 21839 21269 22292 21712 21571 21772 21917 21606 21625 21223 22298 21570 21460 21203 22107 21287 21664 21693 22274 20755 21504 21356 21873 21000 22106 21556 21345 21207 21821 21399 21674 21446 22250 21225 21688 21143 21959 21117 21708 21688 21998 20937 21677 21514 21651 20816 22034 21705 21687 20993 21772 21423 21599 21059 22129 21577 21251 21196 21865 21072 21589 21760 21831 20960 21608 21479 21645 20908 21837 21760 21708 21100 21606 21284 21251 21700 22486 20569 21037 21464 21701 20263 21595 22472 20647 20898 21696 21629 20391 22001 22577 20555 20985 21456 21886 20205 22171 22561 20794 21039 21959 20901 20874 22612 21762 20645 21124 21838 21083 21660 21608 21669 21099 21572 21444 21222 21513 21936 21100 21905 21324 21661 20843 21858 21715 21419 21079 21746 21444 21428 21613 22047 20971 21398 21143 21981 20915 21622 21673 21613 20907 21504 21383 21500 21231 22281 20963 21593 21069 22026 20796 21664 21601 21898 20880 21536 21484 21504 21296 22218 21227 21659 14805 17794 17348 18785 18914 19523 18584 19148 19289 19660 25285 24357 23271 22448 21793 22630 21509 21852 21936 22187 20979 22300 21517 21794 21093 22140 21677 21450 21339 21719 21239 21471 21762 21925 21077 21499 21430 21677 20977 22007 21719 21231 21160 21952 21027 20867 22469 22167 20427 21400 21595 21879 20363 21841 22720 21334 20541 20448 21601 21173 20363 22052 22724 21203 20798 21346 22024 20677 20782 22538 22122 20544 21693 21591 21611 21005 22067 21741 21290 21243 21710 21341 21266 21694 22000 21029 21653 21405 21882 20901 21749 21719 21651 21025 21671 21461 21445 21135 22198 21397 21569 21214 22003 20977 21677 21779 21835 20867 21692 21456 21467 21299 22262 21024 21562 21079 22080 21122 21687 21668 21864 20907 21683 21521 21580 20958 22100 21440 21548 21243 21840 21490 21389 21321 22285 21211 21588 21292 21827 20827 21947 21694 21431 21129 21680 21375 21440 21249 22393 21315 21634 21422 21845 21002 21788 21801 21431 21152 21708 21654 21357 21357 22153 21124 21517 21235 21922 20901 21927 22510 21253 20876 21464 21991 20759 21323 22995 21072 20865 21235 22120 20582 21367 22817 21196 20916 21337 21975 20408 21688 22763 20871 18533 19781 20167 18869 20384 20993 20104 20427 20135 20960 22712 22349 22289 22274 21197 21911 21593 21527 20999 22071 21837 21362 21181 21687 21509 21478 21294 22183 21568 21558 21153 21910 20971 21670 21634 22009 20739 20975 21227 21908 20906 22032 21685 21572 21072 21801 21316 21487 21321 22265 20984 21360 21095 21874 20955 21552 21568 21975 20811 21589 21360 21755 21429 22221 20963 21551 21353 21792 20945 22104 21475 21358 21152 22032 20858 21908 21555 21447 21203 21739 21253 21321 21624 21920 20890 21404 21469 21490 21303 22031 21287 21353 21223 21749 20949 21835 21643 21088 21157 21844 20915 21200 22620 21589 20519 21350 22119 20762 21027 22960 21360 20697 21264 21980 20600 21008 22697 20957 20927 21545 21785 20439 22031 23047 21232 21174 21351 22037 21642 21563 22396 21699 21409 21457 22002 21806 21647 21436 22128 21776 21443 21317 22046 21287 21429 21795 22341 21274 21559 21380 21896 21521 21640 21164 22289 21863 21825 21153 21861 21670 21623 21039 22212 21724 21866 20968 21851 21421 22105 21056 22069 21711 22118 20939 21680 21372 22052 21152 21632 21719 22317 21326 21752 21236 22052 21445 21553 21257 22416 21733 21677 17862 19813 20033 20759 19896 20705 20732 21516 20228 21038 22576 22637 21760 21743 21600 22362 21864 21521 21184 21783 21635 21469 21066 22080 21905 21745 21088 21292 21358 22082 21331 21447 21754 22299 21056 21122 21239 22096 21879 20830 20612 22391 22797 21828 20453 21024 21658 22352 20936 20596 21952 23075 22459 21328 20755 21173 21628 22008 20507 21160 22449 22935 21493 20752 21627 21190 21932 21566 21729 21000 21819 21944 22132 21453 21365 21485 21769 21735 21952 21248 21686 21811 22474 21592 21674 22052 22233 21968 22328 22048 22231 22133 22889 22416 22361 21489 22416 21868 22426 22032 21981 21767 22805 22112 22285 21318 21967 21616 22640 21771 21920 21616 22796 21933 21829 21575 22253 21690 22548 21537 21933 21680 22701 22128 22254 21444 22103 21603 22412 21658 21827 21413 22631 21948 22190 21008 21472 20996 21784 21309 21574 21319 22227 22417 22339 21509 22113 21760 22401 21803 21815 21542 22327 22144 22522 21396 21940 21699 22323 21699 21656 21580 22800 22902 22135 20583 21445 21476 22110 22391 21350 20890 22392 23113 22305 20693 20983 21031 21921 21328 20336 21216 22501 22452 21169 20434 21073 21175 21972 20505 20423 21767 20841 21272 20459 20999 20777 21466 21144 20887 20826 23091 22286 22002 21201 21600 21314 21820 21077 21396 21446 22192 21588 21457 21643 23536 22645 23156 22104 22153 22216 22954 22163 22197 21566 22177 21737 22500 21814 22001 21339 22579 22089 22583 21403 22055 21431 22200 21918 22248 21412 22081 21917 22849 22008 22336 21130 22099 21623 22420 21652 21848 21495 22714 22309 22384 21241 22113 21509 22353 21536 21846 21031 22009 21939 22600 21275 21664 21243 21879 22040 22007 21426 21869 21313 22016 21504 21249 20904 21440 21253 21790 21270 21347 20944 21681 21918 22218 21371 20662 20983 21280 21558 22147 20839 20480 20922 22044 22762 22302 20885 20480 20967 21113 21587 22043 21393 20493 21049 22349 22789 22324 21046 20583 21031 21226 21484 21741 21843 21109 21223 21477 22047 21725 21600 20957 21328 21703 21529 21402 21856 21390 21313 21007 21861 21713 22120 20969 21504 21144 21655 21432 21654 20962 21359 21325 21991 21734 21981 21069 21227 21133 21551 21124 21920 21194 21427 20764 21720 21432 22233 21500 21735 20776 21515 21496 21772 21378 21681 20864 21409 21270 22183 21476 21717 20683 21558 21560 21650 21273 21907 21289 21257 21029 21789 21511 22106 21335 21539 20709 21445 21024 21561 21121 21943 21393 21493 20839 21495 21361 21965 21789 21922 21131 21232 21127 21897 21186 21867 21432 21318 20992 21655 21717 21975 21623 21294 20612 20910 21433 21315 21617 22034 21257 20452 20982 22123 22550 22650 21560 20967 20505 20920 21053 21597 21783 21949 21106 20709 20360 21156 22528 22762 21575 20872 20292 20912 21292 21201 21900 21332 21568 20913 21223 21392 21985 21770 21698 21062 21379 21126 21540 21552 21734 21115 21440 21672 22535 22202 22226 21470 22022 21721 22239 21944 22020 21323 21796 21821 22528 22038 22230 21267 21912 21927 21986 21762 21926 21143 22075 21909 22632 21818 21913 21142 21974 21307 22093 21803 22187 21427 21671 21234 22223 21912 22592 21754 21875 21205 21798 21409 22136 21645 22156 21434 21719 21763 22328 21976 22466 21271 21784 21212 21970 21424 22199 21653 22056 21136 21767 21660 22274 21948 21888 21159 21920 21628 21911 21623 22266 21594 21640 21347 22088 22029 22471 21831 21858 20922 21500 21632 22187 21953 21543 20870 21542 22613 23111 22313 21381 20758 21433 21715 22420 21895 20983 20917 22364 23009 23042 21843 20909 20928 21664 22189 22259 21081 20875 21674 23031 23016 22391 21007 21029 21644 21387 22135 21709 21607 21233 22040 22205 22332 21792 21536 21521 22354 21617 22036 21765 21930 21169 7770 11184 13333 13768 14693 14289 14715 14889 15580 36243 30843 27115 25596 23848 23972 23320 23485 22157 22391 21824 22498 21981 22660 21652 22065 21281 4651 11289 15238 15828 16738 16689 17832 17367 18423 18021 33138 27641 25777 24056 24448 23185 23341 21823 22579 21755 22582 21978 22486 21288 22152 21959 22689 10158 15309 16107 18391 18125 19285 19220 19940 18866 19558 28672 26595 24615 23986 22337 21369 21049 21492 21348 21653 20935 21091 21123 21730 21666 21964 21095 19237 19742 20568 20343 21153 20569 20666 20196 21031 21520 23636 21787 20848 21020 21324 21466 22083 21328 20421 20647 21702 22443 22576 21623 20891 20507 20978 20093 20981 21409 21184 20316 19975 20313 21509 22244 24124 21294 20928 21362 21211 21772 21408 21752 20876 21435 21156 21951 21803 22071 20932 21236 21066 21451 21367 21673 21379 21322 20854 21703 21623 22144 21400 21221 20897 21452 20967 21831 21372 21791 21022 21296 21173 21856 21734 21896 21249 21348 20819 21664 21041 21734 21387 21494 20723 21757 21450 22274 21367 21479 20750 21747 21153 21879 21491 21863 21158 21901 21644 22714 21947 22082 21269 21853 21530 22324 21639 21736 21248 22016 21979 22647 21758 21691 21336 21952 21505 22345 21293 21693 21489 22510 21982 22183 21256 21808 21423 22036 21719 21937 21392 21645 21715 22467 22037 22097 21230 21813 21493 21889 21733 22061 21351 21600 21789 22500 22245 21910 20779 21233 21488 22338 21841 20937 20746 22172 22824 22871 21164 20951 21403 21495 22315 21549 20703 21039 22336 23159 22573 21607 20750 21432 21392 22115 22317 21561 20500 21401 22591 21782 21846 21141 21984 21474 22028 21640 21792 21249 21868 22007 22385 21684 21490 21354 21720 21817 21849 21159 21971 22064 22294 21349 21554 21324 21976 21736 21757 21244 22423 22009 21936 20983 21920 21319 22119 21621 21693 21253 22405 21907 21888 21101 21906 21427 22233 21165 21735 21434 22395 21768 21858 21048 22257 21404 22304 21248 21647 21523 22471 21729 21924 20986 21763 21478 22228 21557 21680 21408 22249 21792 21713 21254 21942 21524 22153 21248 21828 21619 22505 21773 21641 21191 21865 21773 21899 21133 21989 22051 22167 21198 21767 21430 22061 21485 21667 21604 22281 21824 21447 21477 21955 21698 21500 21437 22780 22476 21197 21044 21424 22048 21667 20577 22458 23023 21752 21049 21466 22202 21487 20756 22349 22833 21287 20951 21579 22160 21421 20631 22409 22902 21290 20904 21836 22018 21313 21649 21960 22200 21225 21889 21676 22054 21320 21914 22017 21945 21263 21711 21782 21691 21424 22295 21729 21553 21787 21941 21625 21735 21742 22426 21614 21691 21314 22121 21197 22023 22017 22119 21079 21848 21654 21920 21031 22411 21527 21519 21605 22197 21412 21658 21648 22366 21143 21610 21544 22158 21102 22391 21795 21704 21431 21972 21681 21784 21312 22459 21399 21584 21411 22295 21058 22096 21851 21948 21109 21895 21673 21824 21287 22613 21763 21699 21328 22043 21204 21937 22038 21987 21112 21760 21718 21818 21100 22351 21766 21504 21187 22004 21420 21571 22190 22589 20667 21568 21810 22148 20647 22840 22624 20872 21435 22037 21987 20643 22333 4778 9425 12288 13816 15158 13811 15355 16849 15617 15321 32716 28474 25185 25375 24119 23209 11513 15173 16701 17328 17516 18727 18476 18151 18285 33559 28012 25783 24864 24026 22665 13623 16435 18455 18307 19625 19645 19499 19706 20169 32168 27223 25221 24603 22891 23195 15091 18496 18636 20593 20224 20443 20188 20914 20396 20861 25769 24864 22816 23041 21089 20229 20064 21085 21056 21521 20461 21269 21009 21120 20535 22768 21767 21421 21121 21923 21083 21513 21635 21844 20839 21873 21207 21520 21067 22140 21544 21233 21181 21549 21216 21169 21361 22033 21165 21453 21095 21832 21031 21537 21691 21588 20920 21536 21511 21464 20889 22080 21485 20872 21001 21631 21319 20492 21777 22681 20864 20662 20918 22016 21064 20431 21685 22805 20625 21030 21207 22068 21073 20421 21831 22748 21431 20530 21410 21736 21801 20576 21639 22089 22203 21225 21997 21573 22057 21209 21835 22089 22213 21085 21834 21508 21978 21127 21793 21965 21889 20975 21469 21420 22131 21349 21463 21674 22267 21188 21703 21368 21947 21482 21448 21608 22297 21327 21728 21196 22043 21381 21551 21495 22415 21428 21805 21212 22205 
21397 22576 20725 22809 21144 22567 20707 23184 21268 22630 20696 23088 20997 22546 20685 23047 21365 22024 21429 22118 21680 21975 21427 22215 21571 22060 21371 22165 21513 21737 21543 22055 21637 21664 21738 21916 21760 21377 21922 21763 22036 21477 22041 21474 22205 21506 22190 21203 22327 21368 22071 21232 22286 21301 21816 21529 22086 21701 21238 21765 21777 21977 21818 21696 21607 22016 21677 21511 21760 21714 21944 21379 22231 21306 22521 21262 22369 21729 21671 21353 22157 21414 21575 21785 22288 21229 21888 21586 22071 21177 21991 22231 21782 21380 21826 22016 21603 20857 22752 22398 21175 21203 22203 22208 21079 21193 22893 22048 21051 21473 22217 22048 20881 21948 23022 21289 21329 21353 22535 21209 21005 22519 22759 21284 21625 21729 21868 21450 21460 22160 22072 21469 21664 21755 21915 21652 21418 22153 22001 21552 21534 21911 21664 21462 21653 22173 21735 21527 21550 22056 21877 21546 21617 22312 21705 21801 21413 22135 21248 21821 21923 22234 21328 21886 21679 22104 21180 22091 21952 21719 21369 22066 21655 21623 21821 22336 21275 22357 21537 22243 21136 22187 21943 21691 13368 17344 18060 18741 19299 20177 19550 20046 19637 36373 25770 23562 22867 22538 21626 22058 21825 21889 21397 22342 21765 21652 21348 22117 21619 21641 21800 22413 21398 22248 21617 22119 21287 21982 21988 21994 21069 21793 21728 22155 20905 22416 22243 21118 21133 22211 21883 20824 21931 23128 21196 21644 21592 22513 20519 21938 22842 22112 21019 21414 22421 21458 20713 22871 22247 21156 20752 22473 21715 21171 21929 22088 21544 21520 21777 21969 21639 21424 22061 22037 21534 21975 21899 21864 21483 21848 22228 21331 21781 21753 21941 21399 21945 22016 21760 21431 21794 21888 21824 21390 22321 21584 21873 21509 22189 21501 21772 22005 22136 21287 21902 21664 21808 21440 22344 21600 21709 21436 22277 21268 21928 21991 22115 21332 21868 21776 21762 21424 22443 21376 22129 21551 22184 21129 22257 22092 21784 21901 22134 21512 21841 21799 22235 21218 21956 21801 21791 21440 22451 21563 21749 21453 22272 21397 22106 21903 21874 21486 21921 21724 21688 21396 22395 21814 21739 21400 22136 21440 21600 22060 22426 20978 21612 22278 21271 21085 23063 22052 21091 21240 22490 21350 20839 22427 22528 20860 20984 22373 21287 20945 22916 10800 17582 19241 21031 20437 19744 21364 22229 20445 20826 27593 24025 22398 22266 22323 21569 21312 21812 21952 21370 21850 22148 21701 21680 21789 21861 21569 21580 22250 21385 21234 21705 22068 21376 22131 22055 21805 21639 21840 21903 21634 21589 22245 21277 21813 21618 22144 21299 21944 21874 22032 21303 21835 21751 21968 21239 22116 21973 21815 21541 21952 21750 21969 21168 22265 21895 21808 20858 22064 21765 21668 21873 22258 21221 21857 21511 22237 21154 22161 22012 21836 21456 21970 21776 21681 21557 22379 21608 21776 21405 22085 21639 21664 21793 22348 21354 21893 21784 22039 21199 22272 21896 21576 21464 22102 21473 21367 22205 22147 21031 21712 22259 21163 21004 22935 22138 21136 21261 22356 21784 20811 22586 22464 20928 21305 21915 22384 20480 21876 22821 21865 21063 21460 22452 21094 21633 22085 21920 21556 21779 22016 21600 21650 22312 21875 21496 21573 22017 21623 21575 22123 21824 21504 21696 21917 21605 21573 22283 21796 21622 21504 22180 21429 21783 21896 22085 21384 21768 21824 21913 21293 22325 21904 21613 21532 22176 21548 21735 21819 22236 21224 21848 21705 22020 21312 22247 21850 21764 21390 22296 21447 21889 17895 20368 20402 21255 21288 21399 20834 21888 21520 30586 23917 22904 22007 21817 21586 22489 21360 21787 21531 22202 21377 21862 21994 22167 21181 21870 21657 22072 21201 22386 21892 21692 21868 22133 21681 21544 21804 22773 21248 21565 21601 22472 20866 21371 22713 21992 21081 21498 22376 21250 21030 22786 22400 21223 21489 22285 21677 20825 22533 22692 20931 21132 22399 20928 21433 22663 21856 21521 21766 21952 21416 21952 22219 21435 21573 22019 21511 21579 22337 21521 21680 21669 22058 21296 22001 22002 21587 21559 21990 21659 21685 21984 22045 21379 21889 21895 21656 21531 22384 21560 21335 21687 22103 21197 22222 21838 21713 21320 22061 21675 21627 21701 22263 21218 21837 21670 21874 21242 22451 21736 21703 21411 22191 21479 21700 21830 22233 21216 21794 21776 22035 21200 22144 21999 22029 21271 21933 21530 22316 21159 22038 21953 21667 21216 22016 21789 21855 21219 22152 21929 21955 21354 21844 21632 22195 21341 21712 21937 22059 21010 21301 21682 22348 21124 21176 22265 22891 21257 21255 21234 22679 21524 20772 21777 23096 21824 21210 21389 22041 22161 21020 20920 22633 22630 21469 21117 21419 22284 22184 20792 21200 16964 20773 21091 21130 21450 21636 21848 21357 21522 21969 24729 22309 21955 21728 22104 21784 21516 21565 22313 21971 21664 21547 21792 21874 21696 21316 22008 22052 22141 21300 21802 21554 22234 21422 21691 21799 22246 21523 21760 20865 21941 21719 21925 21181 21993 21934 22117 21209 21780 21467 22245 21752 21754 21287 22215 21911 22042 21227 21804 21530 22205 21383 21611 21508 22263 21959 21912 21090 22041 21359 22202 21525 21716 21140 22062 21862 22313 21347 21667 21455 22039 21846 21915 21180 21812 21843 22357 21363 21611 21016 21818 21812 22133 21325 21696 21713 22528 21777 21536 21001 21730 22059 22087 20821 21113 22355 23182 22126 21255 21340 21516 22133 21801 20480 21950 22745 22814 21355 21168 21432 21667 22452 22060 20771 21126 22113 22917 22164 21467 21699 21481 21921 21957 21570 21480 21932 22154 22192 21582 21543 21372 21958 21923 21529 21382 22058 22069 22117 21361 21767 21545 21861 21817 22057 21219 21698 21953 22377 21365 21890 21481 22031 21843 21894 21184 21841 21871 22434 21678 21588 21361 21885 21766 22078 21192 22228 22055 22362 21396 21832 21427 22127 21824 21910 21254 22146 21876 22224 21168 22404 21489 22197 20452 21387 21298 22294 21780 21853 21338 21936 21479 25158 22120 21863 21832 22464 21655 21656 21065 21952 21823 22016 21319 21927 21809 22260 21639 21567 21461 21821 21815 21910 21138 21872 22254 22850 21687 21165 21159 21607 21760 22734 21412 20751 21172 22599 22947 21688 20997 21565 21315 22158 22485 21762 20524 20984 21922 23001 22629 21317 21159 21517 22125 22294 21692 21288 21771 22032 22143 21764 21504 21755 21655 21776 21960 21481 21618 21925 22246 21858 21523 21505 21752 21582 22144 21880 21601 21431 22112 22044 22059 21263 21763 21489 21955 21834 22165 21570 21641 21410 22379 21943 22084 21305 22036 21435 22125 21761 22165 21336 21656 21624 22417 22042 22096 21237 21743 21414 22072 21696 22139 21254 21740 21603 22405 22179 22256 21408 21781 21351 21989 21680 22231 21317 21734 21459 22310 21913 22363 21556 21761 21346 21900 21658 22221 21539 21661 21547 22272 22032 22123 21294 21847 21767 21906 21793 22189 21453 21657 21426 22102 22150 22839 21396 21158 21248 21577 21590 22469 22321 21691 20726 20928 21540 22934 22987 21835 20768 21570 21252 22084 22384 21981 20721 21031 21607 22932 22791 22358 21188 21114 21239 21623 21872 21952 22008 21635 21410 21414 21872 21976 22200 22069 21875 21490 21605 21993 21672 21760 22181 21930 21723 21313 21621 21701 22112 22027 21969 21325 21748 21968 21817 21839 22161 21504 21658 21259 21927 21849 22403 21892 22024 21147 21921 21399 22071 21700 22231 21430 21539 21314 22098 21913 22396 21747 21901 21261 21812 21668 21973 21542 22299 21457 21707 21345 22198 21944 22540 21972 21857 21296 21808 21413 21955 21616 22183 21439 21675 21468 22327 21932 22299 21333 21831 21307 21920 21714 22149 21349 21524 21683 22333 21920 22049 21254 21952 21428 21930 21768 22233 21431 21516 21333 22375 22401 22384 20663 22085 21456 22436 22293 21519 20650 21151 22117 23142 22649 21988 20888 21239 21186 21392 21725 22675 21924 21227 20591 21569 22248 22972 22790 22038 21025 21240 21552 21607 22041 21888 21740 21361 21685 21808 22043 22168 22144 21724 21530 21697 21651 21661 22039 21960 21536 21421 21870 22005 22304 22030 21728 21296 21888 21530 21897 21904 22112 21433 21622 21401 22102 21979 22309 21472 21745 21564 21906 21545 22200 21521 21676 21190 22081 21909 22312 21319 21756 21463 21966 21749 22179 21498 21615 21320 22157 22034 22072 21220 21991 21409 22148 21797 21896 21254 21853 21581 22332 21865 21929 21411 21889 21440 22148 21716 21773 21092 22022 21770 22450 21869 21632 21248 21861 21480 17336 19128 20199 20012 20253 19976 20775 20800 21249 30327 24679 22684 23008 21877 22413 21766 21721 21279 22227 22388 22729 21254 21156 21194 21398 21644 12256 19144 20153 19608 20908 21841 22423 21755 21186 20433 26807 23130 22628 22577 22607 21290 20949 22250 22985 22653 21608 20905 21511 21308 21969 22137 21618 15845 19553 20984 21541 21801 21559 21181 21191 21467 21355 24985 23000 22218 21632 21744 22097 22386 22039 21653 21536 22327 21527 21940 21837 21972 21380 21621 18446 21154 21568 21999 20976 21563 21295 21689 21608 30328 23218 22190 21700 22358 21952 22220 21243 21760 21436 21973 21703 22213 21378 21712 21263 22080 21899 21120 21175 21520 21142 21800 21312 21953 21719 22148 24266 22482 21935 22560 21952 21989 21303 21804 21852 22009 21632 22316 21702 21784 21389 22176 21879 22511 21728 21705 21312 21917 21527 22132 21777 21857 21184 21796 21735 22396 21888 21902 21120 21829 21577 21831 21671 22284 21590 21696 21143 21735 22133 22937 22449 21824 20932 21191 21405 22503 22274 21416 20465 21363 22043 23129 22160 21575 20848 21649 21220 22103 22308 22128 20556 21412 22370 23100 22082 21184 21185 21941 21720 22028 22051 21789 21508 21611 22117 22225 21644 21435 22063 21697 21920 21959 21600 21364 21781 22045 22275 21921 21504 21446 21790 21584 22135 21797 21652 21223 21916 21932 22370 21714 21671 21296 21725 21543 22093 21801 21820 21185 21865 21853 22311 21447 21766 20983 21952 21760 22287 21373 21657 21657 22311 21920 21725 21514 21820 21497 22159 21662 21760 21152 22092 21826 22359 21636 21726 21465 21880 21658 22199 21304 21668 21517 22444 21840 22032 21164 22132 21520 22183 21685 21828 21236 22018 21856 22296 21273 22040 21442 22152 21735 21654 21293 22163 22001 21997 21289 22065 21586 22160 21425 21617 21731 22477 21797 21580 21114 21708 21784 22404 21216 21149 22528 22986 21750 21161 20632 21779 22309 22162 20588 21225 22436 22976 21424 21107 21217 21773 22384 22084 20709 21143 22311 23221 22390 21258 21192 21367 21927 21899 21495 21552 22188 22101 21704 21460 21046 21642 21995 21760 21465 21664 22247 21896 21491 21514 21808 21848 21948 21240 21792 22052 22176 21406 21722 21479 22088 21621 21559 21817 22365 21655 21598 21543 22108 21847 21756 21324 22258 21958 21772 21402 21901 21729 22007 21168 22309 21899 21670 21385 21924 21753 21865 21309 22292 21894 21754 21652 21897 21793 21785 21258 22342 21799 21584 21395 22044 21744 21670 21543 22372 21591 21830 21381 22309 21498 21756 21732 22450 21197 21908 21612 22097 21171 21979 22019 21920 21435 21881 21913 21911 21147 22240 21831 21615 21385 22167 21537 21610 21888 22768 20864 21771 21509 22134 20601 22196 22813 21483 21191 21842 22409 21047 21472 23033 21576 21172 21707 22399 20599 21624 22873 22158 21024 21423 22180 21780 20705 22008 22085 21476 21799 21957 21677 21472 22201 22115 21418 21904 21773 21880 21625 22071 22128 21331 21805 21828 21941 21335 22135 22072 21708 21520 21860 21737 21622 21732 22372 21427 21926 21466 22175 21414 21857 22000 22119 21307 21896 21872 21699 21477 22391 21563 21719 21431 22289 13216 18621 19866 20443 19840 20640 20528 21008 20209 21220 26754 23727 22392 22581 21583 11031 18816 20697 20356 21470 21081 21613 20683 21428 21438 27251 23686 22918 22102 21745 21626 19223 20353 21059 20937 21821 20992 21742 21746 21760 27826 23637 22540 21949 21682 22539 18342 20451 21013 21997 20567 21591 22662 21606 21040 21326 23988 21710 21440 23216 22157 18433 20517 22110 21544 20813 22644 22509 20739 21600 21952 23552 21000 22686 22649 21330 21203 21888 21904 21339 21825 22177 21565 21564 21878 21899 21539 21721 22248 21669 21701 21543 22055 21579 21682 22000 22232 21409 21688 21858 21782 21341 22176 21950 21643 21405 21870 21795 21632 21565 22371 21679 21809 21441 22256 21395 21724 21769 22469 21313 21844 21490 22158 21560 21719 21927 22332 21383 21896 21328 22253 21619 21713 21681 22453 21572 21668 21435 22103 21753 21603 21575 22354 21538 21750 21436 22162 21757 21696 21581 22487 21549 21741 21442 22128 21600 21713 21568 22330 21720 21715 21617 21944 21826 21767 21320 22268 21913 21861 21415 21960 21811 21653 21045 22777 22247 21056 21194 21696 22422 21725 20641 22956 22256 21138 
41944 34112 34757 36535 39211 34138 34475 40472 40545 34938 34312 39424 37728 33577 34294 39177 41783 38737 42362 40005 34956 38235 42263 41104 33911 38954 41911 40448 33120 35468 33337 38932 34471 34427 35521 37498 35552 41427 37684 35808 38608 42864 39131 42743 41066 32912 40409 40130 42135 41861 39532 40280 41635 41147 36552 33088 39202 35282 40469 35933 35848 38215 36569 34912 34136 38185 35088 32853 35361 35193 37717 41644 41283 41192 44213 40622 39412 41167 41612 41921 37136 35956 36544 37945 36505 32928 36786 35410 38188 42272 41435 41707 42772 41711 39640 41440 40795 36323 39509 35681 34515 39159 33823 32795 38595 32802 41049 33573 39571 40884 41010 42704 36390 37968 39281 40848 41307 41736 33832 39872 37987 44133 36670 40567 34576 35385 37012 42426 42763 40229 39273 42926 34830 35911 37563 34528 41960 40299 38625 33352 33107 37392 34551 42435 34871 40327 35876 33147 33304 38759 37270 33367 34033 41461 35449 36201 42002 40296 40180 36788 37609 41024 41194 37612 35156 39402 39841 39680 37867 35568 41664 39241 34820 34368 36521 41706 40913 42356 33402 40937 39161 40704 38122 35254 28409 38724 37241 34137 39985 39648 32939 38080 33777 39001 37551 34553 37273 33526 34247 38914 36524 37067 41868 42264 36016 34455 41207 39940 34468 34321 36032 42768 42112 41253 34417 39744 40942 38619 38400 38520 38684 36140 35329 40072 36865 42572 41360 39399 39368 40851 37514 35783 37805 40172 40023 34624 33768 43574 32754 37552 37113 39468 38112 42112 43009 42710 34997 37459 41267 39520 34954 43305 35641 39537 37831 39329 33357 32631 35660 38011 34536 41851 39424 38888 33402 38111 37463 36950 42935 37014 40854 41413 36211 35859 37799 42000 38158 38358 35584 42300 36297 36952 36288 41862 41952 33880 36924 32848 40407 43351 36195 38611 39964 40969 37634 34572 36045 42087 42215 34100 35317 42240 41499 40593 37782 38569 39777 41305 37286 35749 35584 41927 43429 41703 40032 33768 40182 39248 41336 39648 36064 37344 39974 32955 36475 36301 41079 40237 38064 36304 36293 42086 43435 34013 35723 42528 41254 42091 39856 37701 37079 42980 37768 35549 34890 41634 43013 36672 35793 41734 40113 42249 34138 38968 42944 37780 34279 41134 40790 39008 39643 38969 38852 40448 43792 41754 36356 42979 33480 36168 37637 42448 41046 37305 37783 31609 31873 39209 38229 42293 34891 41453 41164 42674 36119 46681 40313 43008 41707 42052 33792 40727 36469 37735 41728 37069 39895 35331 34696 36109 36936 33542 33632 41043 41897 40553 35432 38999 41480 40148 39239 36500 34485 36422 37523 34252 33810 40998 40896 36634 34169 39600 40977 38016 37094 38515 41106 36941 35936 37896 40569 39818 38345 36585 33288 37603 35844 38037 39436 41536 37547 36196 36352 38896 35920 34631 36966 41189 40394 37024 32976 40970 39463 40192 38868 36752 42292 38314 35804 34819 33425 42400 34313 35633 41992 39584 34650 34432 35953 42042 41728 37458 35977 38841 40200 41160 37370 33677 42332 39795 42765 42056 41080 40128 38304 35232 41233 39772 37871 38242 40045 39128 40616 42295 36172 35739 34176 42902 37035 41002 37816 42375 31872 36893 36821 37012 38534 42554 43383 39052 34357 39251 37479 33454 35812 38250 33920 34308 41474 37344 42952 33990 38299 34524 33687 39766 36439 32544 34784 37553 34147 33562 41271 36268 34327 32440 40077 42384 36376 37169 39353 41728 35963 36277 37510 40929 42064 37408 34379 33067 39940 33507 35601 36503 41004 40350 36903 35243 38369 40881 41449 37035 35719 41795 41625 42752 37381 35624 41168 42007 40653 40807 42139 36103 36962 32796 47984 39240 37880 38784 36561 33754 43428 41689 36408 33232 40473 41664 37216 38498 40376 40024 37334 34682 39018 39945 42609 37376 35153 36949 39953 35014 33139 36145 36404 39986 33896 33847 43094 36352 41804 35962 38287 38732 43123 42664 40400 38208 36330 42297 40547 42976 41773 35218 35805 33437 35116 36908 39170 43031 37020 42340 35383 36656 32919 35603 37692 42020 37994 40973 42613 33988 38401 33030 33682 41704 33152 34598 34688 38918 40726 38670 38551 33959 33481 38263 34832 34930 38081 39031 41736 37322 37368 34567 33136 42149 33703 41345 35330 39585 40135 41135 36957 35276 40936 39360 35077 34448 35096 41344 40257 36998 34784 36940 40457 43361 35840 35305 41923 40932 43062 35401 36517 40975 40129 36200 35712 38683 39820 39892 38877 38864 40719 38026 33194 41552 39761 38928 37965 34820 39893 38448 36276 37072 40168 40108 37848 38017 41560 36884 34129 40429 41624 35380 37655 39168 37782 41060 35075 41997 39136 39702 41584 37973 40388 40589 40416 35505 32855 34916 35795 39715 36423 40032 42008 39088 40139 38041 36896 34832 34628 42624 39473 42353 41623 40541 35524 39694 35469 35143 38656 39176 42560 34544 36626 41616 33172 37912 36356 41624 38204 35426 39430 36045 32903 33537 41549 38376 34625 33344 35785 36984 34931 40846 38767 38954 40256 40960 36453 33344 40832 42436 35477 36262 41112 33237 35377 36180 37824 35545 37575 39884 38640 37924 39784 40194 36070 42701 41416 35970 35841 40773 41068 37741 38859 40454 36464 33100 40612 41943 34544 32625 41269 38322 37448 38666 38896 41864 40886 33280 35125 39046 39301 37105 41712 41636 35020 42599 39158 36895 37584 39777 36444 36745 42201 41863 34536 37722 36508 36288 39912 41394 35158 35206 33101 35664 32937 37510 35497 39089 39533 35915 39027 42320 41089 40121 40549 41523 33197 39800 36352 31565 37846 36152 36762 41584 39600 42295 35041 42995 39328 35271 38985 39735 37994 40128 42922 35464 42744 37766 38071 33588 42520 38008 40107 40488 34072 33280 41621 38224 37666 33167 41452 39253 39298 39856 41638 36121 33321 36832 36465 39008 40240 35216 37816 42496 41909 37319 42843 39168 36843 37229 39545 36790 37300 42864 35283 33749 41356 37611 35808 39323 39850 41008 39283 42375 42012 36792 42201 40306 36473 37424 40323 40023 37227 40704 39571 42552 43113 40896 42537 42101 41008 41671 36101 36952 41313 37796 42930 41315 39912 37243 36549 43067 34997 34469 38404 37840 36776 38298 41240 37972 36330 41201 34693 33743 42402 36865 36528 37424 39105 37057 41386 37240 35133 39548 39702 34386 35441 35946 41856 35339 39493 34586 38114 34999 37546 33740 40867 40400 43736 35912 32363 37389 37555 38947 34840 40938 39741 33228 39808 41588 35328 40571 36138 38501 40348 35814 32528 35792 34662 35635 37902 42840 34488 37552 41184 37015 33041 32492 35584 33834 39594 37248 33995 42201 39744 39008 39236 40732 35936 42752 38249 36692 40192 33691 34286 41753 42828 38220 39296 41081 38851 42517 40217 35787 40141 41344 34774 34208 42517 39076 39387 40520 36140 42003 39357 35044 40016 40439 35893 34054 42467 40628 41254 42000 36240 41542 38634 34848 40964 41244 35829 42496 41937 37741 42419 33671 35496 41227 37528 34695 40856 33444 34662 33360 40833 38700 39991 41045 37085 35861 37255 36072 40559 42784 34931 42000 39799 40152 37288 41733 39650 40173 33908 33784 43184 42001 35403 34775 36688 33197 37901 38856 36800 34958 33437 40019 39397 42464 38640 34766 38047 34329 37856 36554 42168 39907 39180 40622 34650 36849 37753 38610 34400 41764 42294 37200 38189 40612 39351 37264 42811 34418 38288 34820 35424 40334 37848 35612 40832 34549 35097 39424 38852 38156 41322 35935 37850 36520 36880 40053 32724 34450 40348 37928 36901 42577 37366 38535 39494 37616 42006 39529 35208 40982 42445 33523 40752 39593 37633 42729 36043 37405 40519 36488 34645 38128 33333 41440 42624 35648 41251 40827 37985 33626 37968 36880 40631 36338 42023 38216 34149 40379 42736 35259 42594 42272 37979 41675 41490 36907 41111 37584 35286 39925 41584 33202 34832 41960 37609 38864 40408 37898 42189 37925 35784 40960 42552 33237 41093 42736 42766 42615 34455 39158 42440 43186 41752 33396 33715 39424 39900 40528 35196 38202 36458 40496 39832 41736 35873 35131 37437 40354 33643 33410 40950 38753 36487 38732 37952 40395 33420 34071 38708 37053 35707 41429 35255 36096 38912 40231 39881 35637 33079 34872 34467 34704 38794 38040 33080 42048 37430 38661 41477 38981 35456 40576 37147 33152 37140 37197 39496 42421 34610 41792 39801 38524 41736 42752 35968 33580 37152 33361 40352 33081 34723 39697 39352 37558 41622 41395 36167 42660 38484 35905 40304 43161 34774 40917 40404 38793 39208 40205 38711 41987 40113 36340 37175 40303 37173 33939 41811 37256 37713 42049 37332 42147 40121 35444 35924 38631 38665 35936 43008 37449 34144 39895 37143 42656 39605 38413 40028 37910 40408 37385 35360 35268 40052 45776 36330 35313 38631 37287 42840 36052 35424 40759 41112 42720 36130 40243 39469 39989 42007 34752 36970 38432 39402 33345 36621 36649 42912 36240 39584 42240 38720 40374 34820 33890 34471 40584 37414 41264 38902 35276 33956 36587 32932 40800 38257 40073 34328 34849 32565 37394 33265 36091 33568 39680 40034 42912 41908 39414 38898 40896 34307 35470 39347 42577 39148 34710 32915 41678 33432 37600 36808 38105 41584 34586 30647 38991 33523 38565 37441 33737 40851 35272 33995 45302 41464 40822 35287 42147 37988 40880 40742 35736 42272 38470 35378 40679 41671 35374 40560 39280 37520 38795 39827 32965 39078 36274 40758 38040 35568 39818 42549 43713 38292 33720 37621 38436 41079 36488 36800 38679 34211 41608 35409 35893 41812 40377 37477 44089 35677 35200 40724 37813 33253 39668 35968 36785 39542 36221 35724 42640 37226 37448 38816 36673 33721 36555 34903 41250 34119 34813 39256 35858 39938 38263 43110 36568 36904 39952 42229 44145 41443 42181 42786 41929 39222 40364 40087 33949 35852 34380 39968 39824 41691 39889 32963 41747 42519 40183 39328 39639 39789 37908 35432 38615 39014 36293 32705 34096 39633 40930 34667 42293 39508 35181 37319 38144 33920 41372 36220 38985 41318 37689 32635 42157 36441 33636 39936 36326 34455 40192 37696 37787 42296 35499 34858 40538 35829 33349 39392 36359 36437 39638 37186 37014 41756 42744 36068 37800 37808 35565 41505 42071 34933 34593 41658 37578 35665 32848 36336 42968 40588 34976 35432 39120 39565 36551 42304 34512 35526 42570 37410 34675 40608 41008 34896 32977 42888 36784 38511 39616 39941 32969 40329 35176 36384 40261 38587 36816 41392 40775 38884 42342 40200 35885 34544 40792 40361 38639 38692 40846 39188 33890 39788 42229 34457 35494 43476 36486 33762 38912 35388 35888 42434 40182 39611 33368 38508 35875 39454 33799 35841 41616 40238 33408 40103 43085 38642 42040 39205 40178 36169 42308 39452 34754 39273 41911 41480 42824 40616 39943 41922 37984 37456 43104 33568 40364 39712 35268 42387 38600 34524 38473 35579 42569 34825 41189 37362 42955 33234 36000 36690 37940 40369 36113 38839 40227 42213 35725 42817 39563 34480 33506 36320 42391 34962 34051 33260 39472 36999 35929 41111 41399 38205 35942 41856 37671 35496 38686 39461 41788 37608 34849 41609 37749 35916 36993 41123 41558 37434 35921 34440 37189 36052 36008 40320 42208 36534 33655 41636 39093 35673 34747 33312 42104 34272 36478 41622 41892 43274 36228 35495 42968 40290 37496 34261 39272 39712 38532 38620 37457 42448 37508 37541 37608 39442 41015 36873 34464 41578 40532 33319 34002 36869 36170 35963 35892 32810 39729 33572 40363 36983 42912 40197 36813 42659 38571 42627 39573 33741 39416 35511 42822 33756 34180 37349 40192 37909 42418 40552 36032 34468 38476 39412 42791 36588 38006 35072 42394 40924 39892 42272 37383 36023 37104 34440 39194 39785 41372 36631 36456 37834 41409 40279 39280 35400 32736 36696 35648 34289 35392 42217 42457 37888 42680 40780 42240 37109 38384 39915 41241 37386 36949 35159 42690 42994 33984 35425 42266 41554 36867 32995 36020 42340 35949 33527 32070 37290 39952 40330 37545 36804 42544 34417 33895 34116 34588 34361 41062 42928 38922 34424 34268 41970 42688 43527 36279 37837 39589 35810 34258 39273 41269 38560 37165 36629 37332 35856 35630 35456 39077 35621 33504 37904 34932 33536 39878 42568 38090 38664 33135 33872 34840 33989 37840 41332 39532 35506 42073 41232 40384 30583 32007 39532 33341 35661 34816 43783 35078 33737 37639 34182 37434 35491 34940 40984 40244 37133 37193 41434 36663 40244 33900 33468 37041 37401 33280 35313 41017 34988 35116 33312 38918 33925 34752 38269 40960 42096 35248 36764 35992 41412 40367 38209 34624 41940 37421 36185 34089 33601 42201 35365 36231 42180 41328 42050 35760 35814 43272 41211 36905 42805 40465 33672 35382 37696 41968 42010 37443 41024 41543 34516 35163 34816 43079 33865 34585 42278 39904 36029 34048 33674 41894 33376 35687 42266 40296 36196 34910 33826 43484 33824 35691 42154 39936 34007 35127 33348 41728 35564 35308 34086 37676 36458 35873 40960 41651 37712 37024 42183 38208 36437 34560 38144 36582 41226 38313 39927 35104 42712 35858 33640 38221 41120 39288 
23005 24112 22812 23240 22878 24201 22827 23124 23040 24112 23056 23064 23151 23890 22883 23143 23032 23782 23020 23431 23185 23645 23125 23277 23321 23587 23472 23273 23499 23314 23575 23330 23515 23443 23623 23321 23504 23189 23657 23279 23413 23217 23573 23239 23163 23424 23552 23381 23057 23559 23282 23676 23129 23790 22917 23995 22896 23770 22772 23944 22915 23552 23137 23703 23320 23383 23374 23404 23441 23520 23290 23312 23409 23504 23007 23609 23060 23924 23032 23820 22829 23944 22784 23545 23108 23595 23487 23488 23283 23355 23485 23409 23031 23715 23097 23897 23073 23676 22892 23837 22976 23377 23420 23283 23543 23281 23127 23447 23200 23731 23049 23737 22788 23837 22920 23244 23667 22801 24364 22688 22976 23611 22892 24320 22645 23896 22491 23883 23607 23272 23897 22416 24351 22863 22821 24000 22440 24543 22613 23180 23597 22587 24440 22494 23224 23468 23168 23632 23081 23252 24137 23683 23360 22917 23868 23578 23456 23637 24200 23191 23695 23233 24090 23165 23740 23648 24116 23144 23693 23463 23757 23330 24120 23402 23662 23251 24128 23157 23708 23719 24032 23201 23744 2859 14469 15634 17147 16999 17209 17111 17860 17701 17809 32176 28303 25961 26073 24974 25389 24190 24845 24708 24349 24130 24423 24153 23976 23834 24646 23985 23947 23639 24327 23556 23977 24029 24388 23362 24006 23744 24291 23293 23812 24580 24212 23269 23721 24303 23367 23198 25070 24186 23149 23284 24593 23633 22970 24524 24293 22873 23277 23787 24239 22656 24071 24730 23607 23308 23673 24406 22884 23320 24729 23736 23451 23735 23789 23744 23325 23944 24040 23638 23531 23655 23850 23562 23334 24178 23780 23552 23431 24140 23286 23810 23875 23965 23332 23736 23681 23816 23192 24022 23888 23493 23365 24001 23521 23502 23633 24258 23207 23704 23499 24104 23109 23975 23769 23704 23479 23943 23590 23557 23585 24229 23131 24200 23461 24087 23159 23978 23808 23625 23283 24004 23353 23611 23708 23979 23271 23687 23665 23619 23255 24229 23354 23921 23386 24069 23009 24017 23751 23495 23840 23951 23485 23596 23567 24052 23222 23697 23524 23810 23154 24072 23812 23558 23301 23768 23653 23575 23472 24180 23132 23553 23533 24128 22722 24103 24435 23176 23208 23845 24093 22692 23488 24839 23410 23330 23392 24485 22636 24096 24648 23261 23249 14707 17869 17268 18452 20060 19033 18613 18870 19853 19567 27159 26217 25334 24724 24418 24661 23993 24055 24289 24312 23660 23884 24029 23921 23488 24211 23882 23609 22828 24133 23496 23680 23904 24064 23325 23773 23680 23904 23226 24187 23873 23485 23261 24050 23347 23644 23754 24269 23200 23507 23440 24086 23119 23914 23808 23982 23181 23095 23644 23834 23095 24037 23846 23744 23232 23655 23639 23696 23134 24116 23565 23725 23335 24020 23255 23674 23595 24037 23136 23799 23540 23900 23047 24083 23596 23568 22866 23824 23627 23510 23343 24247 23456 23527 23267 23939 23113 23663 23796 23836 23207 23654 23718 23452 23409 24455 23105 23333 23648 23865 22461 23919 24489 23080 23140 23581 24207 22706 23129 24727 23305 23280 23335 24330 22807 22999 24310 24328 22713 23811 23829 24036 22512 24094 24103 23312 23714 23538 23629 23074 23748 23849 23325 23192 23569 23675 23336 23547 23991 23176 23577 23544 23719 23071 23890 23760 23374 23247 23711 23579 23433 23341 24094 23095 23858 23405 23823 22989 23723 23705 23523 23168 23665 23565 23569 23168 24135 23255 23640 23205 23961 23018 23756 23660 23637 23156 23681 23473 23441 23309 24200 11175 18672 19350 20327 19656 20615 20677 20736 20228 20837 28141 25670 24230 24970 24248 24097 22891 24287 23630 23710 23794 24316 23281 23990 23413 24088 23156 23783 23855 23866 23260 23683 23669 23638 23353 24199 23603 23213 23277 24175 23488 22805 24027 24745 22875 23379 23818 23925 22498 23952 24353 23213 23168 23437 24135 22811 23149 24725 23388 23278 23264 24366 22553 24152 24350 22876 22747 23495 23767 23033 23954 23683 23495 23313 23809 23175 23733 23850 23315 23275 23832 23455 23476 23738 23850 23167 23497 23656 23452 23351 24136 23296 23676 23395 23862 22987 23948 23659 23350 22737 23945 23121 23572 23561 23719 23104 23633 23540 23616 23114 24116 23319 23590 23158 23991 23084 23549 23696 23590 22992 23710 23408 23441 23282 24125 23216 23679 23223 23971 22949 23783 23639 23912 22921 23520 23242 23909 23016 23572 23501 23949 23009 23535 23494 23556 22964 23834 23638 23648 23015 23481 23330 23873 23094 23357 23373 24019 23192 23627 23241 23909 23060 23188 24064 24541 23049 23089 22982 24016 23787 22614 23556 24633 23719 22763 22682 23620 24121 23073 22693 24376 24417 23232 22849 23160 23891 23841 22371 23217 24352 24419 22953 19180 20703 21196 21659 21171 21367 21797 22148 21454 30182 24882 24537 24001 23577 23557 24129 23821 23508 23433 23546 23584 23396 23090 23822 23773 23725 23133 23971 23259 23930 23202 23368 23356 24013 23100 23452 23111 23738 23498 23541 22929 23836 23601 23857 22930 22896 23158 23983 23207 23369 23220 24071 23632 23664 22923 23602 23152 24005 22991 23449 23389 24135 23352 23445 23188 23516 23200 23961 23221 23380 23273 24089 23537 23726 22859 23655 23090 23747 23394 23382 22967 23676 23625 23735 22828 23447 22932 23621 23372 23382 22799 23437 23384 23953 23136 23150 22976 23389 23440 23620 22423 23276 24107 24304 23002 22749 22970 23260 23993 23631 22208 23156 24310 23843 22487 23159 22912 23776 24007 23097 22208 23435 24245 24537 22987 22707 22897 23081 23606 23303 23188 22926 23665 23675 23454 22954 23241 23165 23504 23620 23319 23132 23685 23556 23447 22973 22767 23109 23734 23266 23219 22913 23560 23526 23831 22980 23447 22976 23637 23321 23237 22917 23627 23458 23858 22984 23474 22937 23553 23279 23468 22741 23485 23340 23623 22984 23671 23053 23809 23278 23365 23017 23977 23525 23763 22825 23734 23085 23904 23026 23355 19652 22415 22279 22375 22048 22588 22359 22979 22017 22551 24614 24446 23335 23573 23175 23659 23512 23585 22944 23721 23607 23863 23008 23287 22952 23383 23345 23461 22791 23623 23596 23757 22619 23032 22934 23432 23828 23632 22413 22560 23417 24548 23713 22916 22625 22938 23399 24115 23175 22415 22528 23542 24311 24419 23260 22576 22905 23019 23877 23463 22160 22679 23719 23556 23570 22925 23321 23040 23392 23536 23398 22943 23261 23464 23784 23081 23221 23149 23368 23361 23556 22888 23157 23363 23799 23603 23532 23025 23387 23191 23776 23437 23407 22924 23485 23454 24036 23423 23373 23139 23429 23149 23849 23273 23339 22793 23635 23484 23983 23257 23255 23146 23519 23117 23861 23255 23335 22934 23705 23351 23968 23155 23296 23058 23485 23071 23701 23405 23672 22855 23626 23380 24139 23380 23334 22860 23409 23079 23680 23362 23751 22954 23309 23212 23910 23462 23223 23017 23473 23199 23799 23417 23413 22879 23482 23451 24004 23623 23390 22726 23365 22787 23664 23808 23833 22691 22557 22787 23973 24384 24576 23429 22949 22809 23065 23433 24269 23528 22837 22428 23536 24281 24550 23557 22901 22732 22388 23111 23830 24071 23808 23057 23021 23431 23480 23801 23672 23464 23045 23325 23133 23318 23334 23622 23475 23329 23000 23175 23223 23682 23604 23881 23316 23253 23033 23258 23192 23715 23407 23456 22809 23484 23397 23899 23534 23682 22984 23346 23144 23473 23187 23916 23309 23328 22872 23533 23361 24105 23463 23611 22918 23543 23057 23541 23229 23831 23336 23539 22874 23500 23345 23995 23441 23598 22800 23572 22323 23467 23304 23930 23305 23452 22820 23601 23337 24087 23258 23324 22951 23573 23077 23761 23351 23488 22832 23501 23401 23883 23262 23205 22945 23369 23152 23760 23088 23239 22697 23367 23368 23936 23410 23171 22771 23642 23057 23946 22791 22434 22672 23941 24322 24251 23081 22748 22996 23040 23168 24069 23799 23330 22469 22461 23213 24379 24310 24048 22765 22679 22872 22945 23280 24041 23969 23250 23060 23157 23566 23584 23695 23171 23096 23015 23739 23115 23353 23435 23424 22848 22965 23029 23643 23473 23463 22765 23287 23040 23315 23208 23729 23139 23143 22805 23409 23348 23858 23432 23431 22846 23608 22947 23568 23332 23580 22848 23250 23128 23811 23348 23559 22782 22759 22941 23552 23328 23257 22715 23442 23317 23923 23260 23446 22728 23400 22982 23771 23045 23212 22861 23671 23421 23766 23047 23200 22997 23286 23129 23652 22836 23268 22967 23810 23429 23665 22805 23443 23132 23421 23120 23731 23232 10522 14496 16363 16875 17776 17681 17925 17387 17956 18192 29401 26605 26104 24800 24685 24335 24840 24488 24121 23372 23986 23632 24213 24416 23975 23079 22919 14941 18736 19768 19949 18731 19029 19188 19547 19943 20679 27727 25383 24027 24426 25028 25600 23940 23504 23537 23655 24152 24701 23897 22921 23604 23812 24155 18689 19989 19918 20535 20515 20768 21041 21235 20848 30624 25538 25120 24747 24733 23911 24109 23761 23973 23904 24197 23681 23607 23339 23996 23885 24276 23568 19939 20575 20840 21175 21975 21610 21747 21180 21893 27287 25438 24416 24076 23605 23941 23459 24268 23636 23832 23115 23891 23703 24304 23791 23830 23101 20023 21644 22589 22432 23009 22468 22693 22039 22888 22627 25490 23782 23751 23283 23731 23394 24027 23601 23701 23060 23759 23466 24142 23555 23637 22979 23748 23217 23735 23557 23954 23173 23362 23271 23936 23737 24000 23181 23495 23184 23709 23402 23968 23594 23736 22997 23560 23442 24084 23743 23837 22807 23003 23321 23322 23527 24403 22956 22618 23043 24215 24531 24303 23110 22958 23212 23307 23690 24236 23230 22573 22565 23351 24500 24224 22805 22848 23474 23388 24023 23981 22714 22433 23344 23415 23877 23515 23223 23153 23407 23405 23713 23258 23105 23296 23724 23726 23561 23040 23391 23174 23521 23507 23636 23008 23239 23268 23796 23641 23633 22905 23509 23033 23489 23429 23697 23173 23265 23034 23821 23540 23797 22909 23666 22965 23739 23383 23495 22800 23552 23320 24021 23200 23279 23181 23435 23399 23729 22968 23293 23187 23890 23520 23731 22801 23545 22949 23552 23312 23716 22812 23490 23521 23885 23194 23216 23118 23461 23216 23841 23011 23292 22968 23856 23506 23661 22941 23353 23028 23782 23089 23255 23056 23919 23545 23469 22916 23341 23221 23771 23026 23256 23416 23913 23143 23099 23079 23396 23302 23890 22588 22949 23840 24639 22894 23071 22812 23651 23893 22945 22212 23277 24204 24256 22934 22834 22871 23736 23996 23022 22306 23452 24285 24418 23037 22862 22873 23096 23919 23680 22858 23058 23665 23477 23296 22999 23316 23427 23595 23178 23097 23380 23739 23494 23127 23201 23440 23439 23514 22861 23447 23593 23748 22935 23468 22994 23714 23335 23166 23136 23881 23375 23168 23028 23516 23340 23261 22921 23879 23468 23411 22917 23403 23255 23621 22742 23628 23409 23709 22905 23440 23366 23605 22751 23739 23399 23570 22992 23488 23180 23588 22789 23728 23472 23463 23090 23544 23379 23291 22885 23919 23332 23394 22863 23553 23159 23264 23056 23945 23172 23321 22961 23671 22861 23320 23451 23738 22891 23323 23172 23633 22823 23579 23556 23503 22988 23466 23378 23232 23145 23991 23040 22939 22941 24023 22895 22605 24210 23617 22552 23008 23857 23385 22313 23866 23944 22702 23238 23745 23224 22742 24043 24239 22589 23112 23296 24041 22349 23143 24311 23477 23108 23101 23605 22831 23473 23580 23252 23104 23236 23518 23160 23091 23695 23057 23212 23127 23648 22885 23371 23536 23525 22968 23310 23356 23449 22800 23799 23262 23113 23047 23640 23185 23169 23239 23873 22812 23544 23044 23586 22716 23748 23325 23292 22897 23616 23184 23146 23239 14248 15182 16809 16832 17812 17014 17991 18073 18188 33861 27872 26074 25393 24967 25253 15408 18455 18733 19872 19157 19822 19945 20421 19463 20192 27648 25976 24871 25463 24705 15328 19923 20778 20733 20816 20874 21485 20587 21241 21016 27617 24944 25195 24777 24111 23895 21066 21496 21087 22525 22796 21200 21539 22273 22363 26152 25200 25357 23694 23526 24160 22168 21632 22320 23817 22183 22503 22434 23511 21936 22339 25426 24266 23449 23628 24127 23525 23720 23964 24096 23311 23719 23779 23535 23494 24037 23862 23459 22773 23873 23563 23403 23552 24143 23342 23645 23427 23868 23229 23824 23823 23697 23324 23698 23591 23798 23115 24048 23603 23466 23837 23757 23441 23506 23363 24230 23261 23649 23133 23952 23380 23367 23390 24103 23064 23645 23198 23974 23281 23485 23273 24114 23417 23521 23228 23895 23468 23388 23107 23925 23431 23409 23099 23772 23345 23403 23080 24089 23488 23399 23146 23669 23364 23323 23187 24003 23477 23348 23004 23574 23534 23532 22967 23911 23652 23467 23191 23496 23376 23604 22862 23867 24005 23169 23024 23417 23895 23471 22323 23896 24416 23349 23046 23509 23994 
22115 23022 22165 22887 21959 23007 22000 23077 21955 23074 22138 23040 22375 23128 22150 23006 21960 22967 22251 22828 21816 23153 21957 23140 21729 23022 21664 23203 21782 22927 21579 23338 21660 22948 21627 23190 21698 22735 21696 23215 21847 22633 21877 23089 22080 22474 22224 22759 22301 22547 22512 22213 23269 21733 22621 21312 23488 21582 21967 22080 22839 22563 22371 23180 21495 23691 21644 23303 20909 24035 21075 22448 21627 22528 22702 22048 23010 21177 23912 21632 22493 22097 22848 22465 22659 22557 22151 22845 22184 22157 22369 22520 22729 22153 22760 21866 22973 22032 22515 22232 22674 22689 22265 22389 22245 22496 22699 21249 22947 21664 23084 21715 22447 22308 22547 22487 22501 22119 22561 22208 23083 21761 22977 21629 23233 21773 22519 22264 22304 22567 22283 21989 22638 21930 23060 21732 22937 21977 22837 22330 22432 22199 22499 22228 23192 21984 22791 21625 23062 22169 22770 22295 22371 22516 22565 21812 23103 21805 23343 21669 22541 22144 22574 22619 22225 22146 22477 22167 22935 21856 22952 21719 23084 21944 22477 22373 22294 22887 22231 22210 22358 22124 23352 21375 23143 20890 7223 8350 9589 11112 10748 11537 11861 34301 32013 30592 29760 28056 27043 26759 26199 25310 25152 25658 24570 24331 23887 24583 23776 23502 23788 24428 23040 23552 23301 23780 22669 23706 23495 23508 22549 23235 23064 23374 22184 23845 23040 22806 23109 23461 22520 22809 22756 23576 22176 23070 22571 23187 22085 23195 22967 23072 22133 22983 22545 23013 21980 23478 22720 22704 22191 23161 22407 22555 22775 23475 21847 23053 22294 23303 22000 22729 22743 23237 21956 22928 22473 22948 21906 23220 22936 22479 22108 23146 22349 22452 22626 23251 22088 22683 22176 23177 22008 22881 22920 22592 22051 22814 22693 21841 22561 24021 21888 22041 22085 23651 21063 22901 23810 22020 21742 22621 22980 21206 22751 24153 21772 22042 22229 23213 21203 22745 23617 21604 22059 23207 22043 21495 23301 22912 22240 22126 23080 22181 22320 22935 22746 22188 22433 22596 22167 22513 23173 22155 22628 22347 22981 21970 23095 22807 22336 22272 22821 22528 22416 22112 23264 22243 22437 21985 23007 22084 22528 22709 22755 21993 22569 22541 22420 22049 23417 22139 22542 21980 22963 22000 22496 22565 22989 21748 22580 22579 22539 21820 23232 5751 8495 9652 12234 11936 13245 13609 15160 13981 32691 31157 30478 27784 28295 26533 26089 24983 25676 24424 24381 24086 24770 23117 23607 23405 23872 22598 23797 23651 23130 22832 23513 22855 22898 23138 23683 22422 23059 22768 23264 22147 23629 23068 22050 22070 23282 22588 21680 22693 24391 22103 22167 22420 23674 21603 21780 23467 24238 21574 22286 22553 23434 21431 22240 23975 23562 21447 22302 23016 22850 21469 23779 22868 21975 22726 22523 22785 21911 22956 22887 22339 22427 22599 22619 22168 22440 23271 22196 22504 22211 22976 22114 22439 22856 23091 21898 22662 22632 22608 21826 23249 22496 22440 22135 23078 21952 22448 22677 22810 21973 22695 22441 22543 22102 23357 22439 22351 22000 22989 22329 22449 22662 23003 21720 22620 22203 23063 21676 22977 22496 22725 21781 22775 22445 22423 22166 23143 21862 22743 21956 23266 21752 23019 22696 22853 21834 22625 22280 22400 22184 23220 21892 22496 22154 22969 21860 22777 22762 22693 21911 22615 22439 22327 22080 23323 21840 22605 22138 23189 21408 22452 23561 22912 21257 22034 23024 21675 21685 24032 22108 21575 21724 23297 21333 21912 23760 22261 21547 22180 23089 21402 9778 12626 12188 13518 14751 15815 16081 16064 17671 17340 30112 28407 27790 26469 25329 25316 25344 23932 24167 23652 24161 22997 23713 23629 23593 22660 23112 23048 23313 22508 23692 22818 22880 22377 23321 22563 22747 22840 23575 22161 22812 22320 23324 22087 23022 22831 22938 22128 22897 22614 22604 22130 23404 22519 22677 22213 23255 22080 22563 22605 23394 21648 22697 22391 22547 22240 23275 22239 22663 21993 23079 21677 23284 22432 22595 22157 23260 21806 22929 22673 22501 22034 22951 22320 22371 22624 23042 21807 22640 22582 22504 22069 23261 22198 22496 22201 22988 21624 22907 23160 21923 22032 23165 21930 21824 23532 23125 21319 22065 22944 22264 21321 23927 22970 21552 21738 23326 21146 22208 23765 22206 21713 22261 23116 21661 21560 23980 22539 21680 22337 22608 22446 21841 22747 22772 22209 22064 22285 22531 22560 21907 22940 22470 22192 22625 22583 22379 22334 21845 22918 22794 22423 21808 22445 22065 22849 21793 22508 22667 22784 21862 22532 22224 22983 21794 22365 22355 23168 21827 22577 21875 23030 22061 22246 22165 23270 22304 22244 21543 22845 22357 22427 21572 23049 22420 22623 21845 22697 22204 22892 21745 22742 14541 16410 16217 17545 17526 18825 18510 18979 18772 29004 27201 26048 24554 24839 24249 24279 22945 23789 23619 23885 22455 23625 22699 23466 22288 22731 22699 23648 22410 22599 22329 22916 22669 22136 22101 23874 23413 22086 21421 22221 22673 23309 21607 21487 22474 24064 22423 21520 21981 22503 23113 22528 21161 21681 23511 23994 22089 21676 21850 22992 22903 21837 21238 22424 23121 22835 22731 21884 22384 22094 22791 22414 22007 21973 22528 22784 22987 22063 22174 22063 22622 22412 22425 21595 22481 22638 22848 21882 22036 22112 22343 22059 22631 21639 22062 22158 23033 22296 22324 21701 22471 22079 22843 21636 22381 22168 23240 22317 22307 21873 22494 22159 22480 21543 22725 22359 23209 21871 22313 22029 22633 22318 22736 21640 22265 22102 23124 22437 22094 21849 22579 22190 23010 21576 22373 22263 23392 22592 22743 21722 23175 22315 23001 21741 22155 22308 23012 22273 22321 21957 22301 22030 22804 22166 22314 21732 23021 22399 22309 21736 22455 22248 22930 21740 21525 21850 23737 23429 22368 21152 21563 22231 23261 22006 21361 22784 24165 22903 21619 21969 22182 23113 22871 21368 21532 22964 24082 22546 21575 22087 22485 18460 18516 19172 19746 20761 20721 20513 20435 20754 20976 25444 24123 23746 23971 24051 22848 22699 22464 23059 22832 22830 22097 22776 22481 22904 22052 22166 21830 22548 22360 22448 21527 22528 22384 23174 22290 22297 21632 22476 21990 23004 21847 22475 21787 23020 22613 22773 21607 22496 21836 22796 22273 22705 21516 22378 22083 23176 22577 22482 21799 22596 22065 22912 21926 22305 21831 23063 22313 22853 21539 22714 21863 22968 22297 22343 21988 23049 22660 22911 21893 22504 21888 22720 22460 22813 21889 22400 22699 23320 22433 22455 21927 22669 22182 23011 22481 22203 21611 22691 23591 23840 22016 21728 21710 22176 22707 23297 22456 21223 21194 23078 23819 23849 22597 21568 21559 22163 22757 23286 22264 21188 21464 22928 23622 23862 22501 22112 22129 22236 22553 22592 22811 22195 22088 22267 22787 22755 22971 22345 22237 21983 22470 22400 22888 22241 22202 22202 23046 22777 22843 21840 22478 21840 22631 22306 22869 21982 22243 21779 22816 22516 23321 22227 22331 21948 21863 21951 22989 22390 22929 21755 22263 21920 23061 22664 22729 21634 22472 22352 22812 22336 23009 21739 22407 22000 23092 22600 23088 22026 22369 21722 22565 22203 23048 22376 22772 21703 22503 22082 23176 22543 23307 22274 22513 21669 22601 21911 22558 22455 22876 21984 22388 21723 22619 22429 23216 22311 22314 21858 22987 22016 22906 22412 22760 21623 21916 22104 23451 23632 23444 21838 21581 21742 22221 22478 23076 22726 21879 20864 21696 22590 23833 23608 23213 21832 21501 21420 22018 21848 23203 22631 21767 20838 21659 22533 23627 23180 22635 22373 21760 22528 22227 22421 22607 22816 22199 22071 22310 22951 22919 22678 21920 22186 21671 22414 22272 22528 21846 21974 22174 22901 22407 22314 21574 22386 21776 22454 22246 22680 21863 22001 21832 22870 22475 22864 21549 22624 21745 22809 22123 22700 21513 22274 22134 23121 22471 22788 21716 22189 21786 22549 21784 22829 22245 22509 21433 22468 22111 23124 22407 22816 21802 22256 21867 22471 22288 22875 21907 22213 21649 22720 22244 23262 22356 22717 21482 22452 21878 22645 22201 22853 21672 22131 22005 22918 22547 22999 22045 22138 21762 22469 21977 22825 22293 22434 21646 22341 22561 23194 22281 22021 21297 21879 21901 22841 22807 22159 20792 21314 22490 23954 22439 21591 21148 22051 22227 23256 22534 21735 20858 21817 23052 23597 21767 21519 21808 22267 22751 22958 21523 21056 21868 22368 22889 22776 22217 21922 22442 22082 22618 22493 22118 21849 22389 22499 22956 22682 22421 21872 22349 2873 6557 8461 10530 10954 11752 12135 13371 13779 14729 33449 31590 29428 28610 27377 27547 26243 25791 24743 25479 24883 25277 24032 24048 23361 24065 23175 9133 10701 12855 12896 14885 15279 16679 16423 17104 32634 31792 29423 28871 27338 27356 25621 25686 24995 25785 24698 24686 23431 24113 23409 24094 23607 23797 11950 14187 15239 17175 17182 18176 17312 18503 18113 31170 29045 28360 26480 26055 25329 25876 25217 25243 23776 24256 23552 24079 23589 24139 23513 23459 13968 15910 16745 18577 18310 18696 18572 19861 19436 20468 28780 26880 25089 25819 25995 26249 24704 23402 23035 23724 23353 24517 23552 22716 21824 22615 23783 20281 20536 19815 19294 19768 20145 20617 21159 22083 21528 24622 23984 25304 25200 24177 23881 23032 23331 22263 23410 23240 23599 22999 22743 22733 23198 23360 23464 23000 22858 22345 22936 22624 23300 22812 22896 22231 22848 22693 23502 22869 22877 22115 22745 22248 22793 22417 23198 22592 22660 21973 22848 22667 23463 22823 23126 21899 22837 22090 23240 22481 23020 21815 22701 22326 23503 22775 22830 21767 22847 22049 22937 22284 22940 21623 22592 22323 23271 22377 22507 22026 22968 22025 22885 22327 22552 21696 22760 22452 23563 21857 22407 22210 22672 22226 22990 21895 22481 22088 23083 22692 22946 21741 22413 22528 22692 22471 22883 21921 22305 22261 23125 22739 22931 21997 22302 22028 22651 22428 22836 21928 21616 22129 23959 22823 21953 21386 22436 22213 23356 22429 21438 21120 23063 23799 23072 21175 22029 21689 22663 22999 22634 21131 21423 22743 23968 23383 22400 21276 22032 22018 22777 22578 21923 22224 22466 23094 22771 22640 21914 22473 22332 22754 22435 22064 22029 22719 22809 23045 21868 22691 22051 22775 22199 22238 22043 22979 22747 22614 21955 22659 22242 22883 21761 22358 22189 23207 22513 22608 21845 22460 22188 22970 21964 22585 22311 23269 22189 22384 21466 22640 22363 22855 21687 22457 22560 23154 22164 22390 22125 22728 22172 22985 21541 22448 22281 23243 22392 22394 21719 22493 22226 22932 21726 22503 22460 23317 21830 22348 21456 22643 22376 22755 21600 22749 22671 22769 21720 22591 22011 22935 22083 22109 22059 23165 22482 22365 21958 22528 22400 22663 21628 22896 22689 22504 21635 22401 22522 22765 21161 22308 23534 23215 21188 21984 22185 23169 21341 21674 23596 23095 21239 22128 22342 23015 21078 22108 23615 23024 21142 21850 22375 22956 21019 21776 23713 22217 22009 22092 22762 22135 22077 22425 22992 22066 22284 22225 22756 22244 22092 22557 22946 21873 22316 22279 22569 21656 22871 22717 22390 21954 22531 22407 22294 21828 23100 22247 22400 21892 22947 21838 22344 22471 23010 21631 22579 22049 22669 21688 22970 22530 22400 22038 22582 22231 22340 22210 23084 22104 22560 22056 22880 21536 22829 22468 22809 21532 22505 22242 22665 21727 22993 22199 22447 21781 22935 21643 22480 22432 23035 21527 22567 22091 22577 21831 23145 22306 22251 21900 22985 22061 22183 22427 23093 21852 22216 22112 22701 21543 22892 22700 22220 22200 22634 22471 21588 22443 23896 21847 21940 22523 22768 20812 22906 23520 21884 21591 22450 22635 3811 7821 11072 10137 11163 12039 13931 12474 13733 35828 32589 30337 29619 28706 26880 11566 13572 14820 14903 16096 16694 17201 16795 18035 34151 32178 30402 29560 28100 27030 14500 16663 16521 17723 17897 19203 18366 19750 19569 19638 30352 29568 27949 26899 26273 18736 17915 18977 19271 20419 19342 20810 20775 20954 20160 28870 27343 26425 25434 26425 25001 20772 20625 21978 21196 22003 21916 22432 21127 22218 26214 26234 24410 25635 24597 24140 23639 24583 23374 23576 23363 24432 22615 23720 23159 23810 22460 23686 23427 23296 22645 23297 23137 23069 22515 23682 23154 22838 22568 23648 22463 23008 23101 23514 22203 23189 22720 23178 22059 23235 23830 22477 22071 23016 23348 21889 21923 24239 23376 21921 22120 22821 23371 21607 22471 24337 22994 21700 22081 22663 23312 22182 21329 23558 23846 22528 21728 22293 22957 22617 22397 22661 23177 22112 22514 22355 22841 22528 22328 22568 23116 22281 22453 22444 22996 22279 22353 22506 23344 22473 22340 22656 22708 22521 22460 22166 23160 22560 22492 22234 22762 22468 22472 22071 23440 22453 22564 22012 22899 22357 22727 21898 23327 22303 22459 
