# Supplementary material for: An Active Feature Selection Strategy for DWT in Artificial Taste
Source: Hindawi journal article supplement (doi:10.1155/2018/9709505), 2018-01-01
Supplement: f1 [file 9709505.f1.zip › beer-low-3.txt]

43477 43476 43476 43472 54 8944 16008 19898 20590 21710 21568 23072 22188 22304 22475 23040 22298 22796 21893 23417 22619 23006 22020 22919 22540 22976 22013 23499 22722 22784 22359 23159 22625 22779 22199 23594 22482 22832 22400 23217 22167 22935 22982 23236 21744 22761 22935 22971 21536 23212 23932 23210 21475 22844 22864 22905 21597 23597 23995 22656 21703 22496 22941 23116 21536 22113 23649 23757 21777 22414 22579 23472 22140 22641 23529 22997 22701 22392 22952 22977 22784 22438 23253 23149 22569 22496 23085 22877 22993 22540 23635 22822 22709 22521 23190 22684 22861 22656 23673 22412 22912 22320 23460 22480 22857 22787 23557 22007 23146 22543 23296 22132 23663 22645 23043 22279 23513 22400 23046 22920 23399 22064 23047 22596 23287 22076 23708 22584 22964 22264 23482 22226 22947 22768 23341 22280 23105 22644 22879 22416 23739 22439 23012 22168 23367 22300 22930 22912 23437 22144 23095 22753 22856 22593 23616 22242 22999 22541 23319 22159 23405 22893 22684 22272 23289 22496 22666 23084 23271 21888 22728 23175 22135 22012 24298 22592 22402 22348 23489 21637 23053 23952 22340 22122 11223 16151 17709 20445 21021 19182 20216 21092 20740 19838 30986 26445 24140 23996 23617 23479 22976 23984 22975 23047 22984 23252 22607 23693 23173 22947 22691 23397 22342 23360 23139 22837 22793 23182 22807 22890 22874 23578 22192 23207 22802 22841 22357 23676 22542 23183 22442 23453 22191 23368 22799 22976 22230 23641 22134 23383 22921 23240 22400 23204 22622 22849 22726 23608 21948 23341 22598 23079 22509 23616 22379 22968 22425 23228 22279 23728 22612 22994 22209 23488 21928 23736 22711 22935 22433 23412 22182 23236 22988 22732 22077 23284 22165 23224 23025 23079 22368 23134 22804 22737 22799 23545 22007 23049 22871 22681 22484 24218 21968 23092 23063 22677 21577 24104 23225 21981 22256 23644 21721 22732 23880 21936 22169 23512 21538 22928 24071 22656 21984 22789 23000 21677 23573 23530 22384 22621 23390 22252 23159 23057 22804 22478 23081 22844 22767 23083 22965 22522 23143 22515 22907 23109 22893 22577 23194 22520 22855 23015 23047 22501 23193 22681 22768 22810 23513 21991 23127 22467 22896 22797 23207 22129 23309 22344 23161 22826 23015 21983 23417 22068 23296 22856 22867 22287 23165 22133 23749 22016 23261 22540 23081 22464 17937 18985 20963 21040 21292 21606 22247 21056 22408 31346 26528 24326 23988 23145 23655 22576 23985 22326 23264 22982 22902 23040 22833 22515 23461 22205 23620 22656 23015 22800 22957 22718 23508 22450 23372 22209 23195 22720 22482 22777 22531 22711 23947 21784 22794 22806 22500 23724 22087 22551 22569 22503 24124 21780 22507 22935 22029 23978 21928 22325 23383 21592 24168 21961 22369 23258 22245 23471 22189 22944 22635 22849 23083 22631 22528 23081 22492 23521 22300 22800 22826 22864 23142 22807 22615 22858 22518 23390 22144 23124 22404 23198 22836 22840 22444 23056 22448 23530 22036 23168 22224 23515 22592 23137 22672 22933 22729 23447 22160 23524 21899 23622 22016 23020 22653 22900 22834 22927 22320 23201 22412 23616 22198 23401 21864 23734 22156 23122 22536 22903 22788 23291 22353 23348 22172 23652 22567 23241 22708 22868 22880 22966 22295 23556 22028 23717 22092 22959 22737 22727 22919 22801 22361 23284 22312 23508 22196 23025 22460 23201 22875 22784 22567 22824 23029 22989 22533 22912 22532 23668 22148 23386 21514 23756 22705 22572 23162 21771 23834 21925 22788 22263 23264 22905 22112 23556 21549 24136 21681 23093 21543 17335 18782 21224 20128 23063 20764 21750 21719 22156 22258 26200 24805 23052 23995 22612 23240 22757 23328 22981 22621 22931 22936 23028 22786 22689 22789 23015 23031 22447 23397 22458 23565 22252 23156 22228 23463 22432 22963 22410 23254 22667 22921 22645 22724 22887 22893 22198 23260 22250 23571 22518 23552 22135 23797 22043 23282 22301 23447 22551 22897 22584 23080 22894 23104 22572 22856 22760 22761 22212 22977 22687 23176 21984 23345 22024 23736 21895 23382 21970 23696 21907 23296 22325 23500 22574 23132 22688 22740 22973 22723 22433 23116 22599 23363 22400 23319 22272 23631 22330 23317 22039 23696 22039 23086 22055 23518 22172 22833 22582 23240 22999 22506 23250 21642 23963 21821 22628 21947 23467 22955 21608 23319 21883 24072 21608 23595 21569 24156 21713 22787 21906 23608 22315 22429 22964 22490 23143 22801 23276 22369 23520 22259 23271 22323 23474 22254 22912 22509 23235 22693 22929 22768 22919 22992 23095 22752 22656 22946 22547 22553 22888 22733 22976 22216 23240 22517 23276 22568 23495 22160 23573 22072 23360 22016 23590 22023 23351 22028 23653 21968 23076 22465 23200 22247 23137 22499 23107 22663 23043 22493 22921 22886 20581 21191 22023 22284 22337 21982 22506 22523 22403 26823 24231 23208 23124 22569 23336 22561 23457 22359 23355 22365 23156 22440 23307 22304 23392 22485 23315 22256 23472 22218 23337 22048 23694 21963 23254 22197 23665 22141 23321 21924 24119 21775 23530 21499 24393 21908 23522 21562 24116 21913 23488 21450 24192 22135 23456 22248 23733 22129 23430 21889 23675 22200 23598 21821 23995 22137 23405 22582 23040 22886 22832 22829 23012 22972 22855 22966 22820 22895 22865 22896 22915 22920 22730 22838 22863 23033 22796 22880 22777 22968 22601 23230 22466 23113 22391 23585 21953 23200 22008 23713 22202 23377 22019 23617 22204 23492 22016 23547 22150 23450 22323 23478 22263 23245 22704 22871 22475 22837 22756 23056 22573 22949 22845 23320 22576 23126 22516 23081 22215 23565 22016 23239 22023 23786 21998 23424 22084 23544 22392 23372 22307 23220 22178 23076 22821 22708 22775 22732 22914 22915 22639 23135 22581 22932 22464 23478 22190 23239 22043 23673 22304 23329 22542 22812 22281 22659 23445 21913 22482 22059 23930 21834 22997 21665 23876 22368 23143 22289 22912 22439 22454 23576 21789 22903 21632 24179 21736 23495 22022 23535 22719 20777 22380 22232 22765 21916 23268 21932 22960 22135 22950 23424 23400 22720 22923 22492 22893 22842 22680 22472 22704 22937 22841 22752 22905 22764 22922 22648 23047 22594 23035 22568 23269 22200 23205 21989 23629 22054 23472 21989 23681 22391 23482 22248 23395 22531 23214 22660 22983 22363 22960 22887 22748 22535 22970 22870 22992 22424 22855 22849 22983 22538 22823 22614 23004 22427 23162 22240 23149 22313 23585 22048 23368 21921 23738 21961 23452 22042 23560 22408 23191 22803 22831 22338 22891 22915 22692 22532 22751 22993 22784 22717 22684 22988 22952 22669 23020 22458 22994 22553 23110 22317 23185 22612 22933 22664 22749 22969 22483 22535 22917 22528 22933 22535 22428 22423 23125 22503 22936 23016 22444 22676 22373 22944 22299 23329 22428 23271 21784 24040 22018 23144 22247 23502 22024 22994 22446 23348 22756 22979 22900 22567 23168 22508 22573 22904 22676 23281 22221 23201 22137 23640 22255 22867 22551 23008 22852 22812 22561 23041 22584 23273 22451 23332 22108 23531 22005 22977 22440 22858 22817 22895 22205 23432 21964 23722 21841 23043 22304 23035 22775 22839 22250 23188 22196 23621 21953 23049 22240 23102 22631 22817 22282 23162 22118 23511 22067 23033 22325 22976 22634 23067 22464 23005 22529 23520 22101 23320 22119 23499 22652 22864 22592 22735 22698 23272 22281 23250 22231 23180 22811 22791 22482 23086 22286 23621 21947 22925 22670 22760 23236 22150 22608 22751 22571 23912 21660 22834 22147 22639 23776 21778 22917 21781 23301 23270 22067 22977 22501 22220 23868 21832 22366 23212 22141 23997 21702 22272 22934 22320 23537 22112 22918 22657 22949 23190 22517 22580 22977 22556 23264 22277 22999 22390 22996 22624 23042 22775 22737 22759 23108 22253 23189 22275 23336 22734 22932 22609 22961 22582 23405 22195 23256 22224 23172 22762 22775 22272 23236 22282 23658 22036 23120 22472 23030 22871 22736 22201 23288 22039 23683 21757 23104 22369 22873 22674 23111 22133 23284 21952 23566 22041 22867 22633 22697 22634 23530 21945 23062 22332 23169 22880 22864 22277 23461 21969 23511 22408 22417 22536 22966 22594 23234 22285 23099 22491 23056 22896 22712 22285 23327 22070 23456 22397 22748 22776 22485 22716 23456 21761 22985 22429 22252 24008 22093 21928 23590 21392 23464 23428 21873 22405 22908 21770 24161 21721 22416 23009 21655 23652 23016 21904 22696 22514 22024 24001 22496 22959 22771 22762 22551 23521 22176 22824 22848 22486 22903 23079 22328 22871 22777 22698 22935 23063 22567 23217 22280 23036 22952 22684 21840 15092 17330 19680 20224 20673 20134 21232 20467 21109 40452 28392 24693 24880 23602 23597 23264 23770 22340 23335 22720 23065 22428 23795 22036 23104 22679 23111 16922 20700 20818 21296 20993 22199 21202 22096 21642 34152 25305 24721 23453 23496 22810 24167 22714 23109 22588 23624 22519 23063 22765 23803 22240 23220 9377 19961 20250 22272 21912 22320 21499 22343 22124 22311 28107 25527 23840 23352 22888 23552 22797 22914 22539 23680 22483 22935 22442 23313 22514 22574 22851 18288 20387 21240 21457 22997 21973 21279 22604 23779 22048 24812 23208 24023 22580 22117 23556 24294 22549 22135 22272 23368 22664 21702 22802 24281 22184 22303 20313 22835 21673 21756 23093 22788 22551 22157 22838 22520 24021 22688 23315 23428 23104 22596 23057 22985 22771 22515 23621 23011 22736 22554 23029 22689 22874 22426 23677 22759 22697 22474 23144 22576 22961 22134 23511 22882 22962 22280 23173 22670 23041 22019 23248 22813 23594 22072 23155 22281 23415 22408 22778 22670 23772 22544 22807 22295 23124 22696 23300 21946 23305 22730 23676 21997 23001 22249 23440 22447 22791 22149 23466 22898 23250 21854 23114 22203 23470 22461 22912 22257 23456 22761 23415 21993 23077 22329 23418 22551 22752 22458 23553 22962 22919 22167 23365 22344 23382 22417 22759 22375 23511 22586 22769 22337 22976 22519 23303 22039 22673 22997 24187 23005 22440 21646 22657 22275 23345 22652 21702 21896 23393 23890 23352 21825 22200 22371 22845 23320 22769 21524 23309 23957 23354 21792 22168 22168 22951 23184 22667 21396 22332 23605 24016 22752 22258 22979 22494 23283 22676 22656 22406 23259 23281 23360 22425 22713 22233 22723 22832 23060 22189 22818 22851 23408 22551 22638 22356 22960 22556 23256 22343 22672 22665 23464 22761 22839 22268 23132 22617 23362 22187 22792 22517 23716 22717 22759 22320 22945 22384 23340 22133 22846 22268 23636 22884 23409 21932 23255 22178 23444 22394 22888 22059 23224 22695 23632 22464 22845 22132 22982 22396 23438 21895 23006 22644 23649 22403 22773 22313 23093 22340 23349 22412 22785 22362 23457 22861 23351 21931 23252 22257 23483 22294 22816 22062 23582 22781 23431 21987 23001 22215 23145 22588 22919 21968 23268 23033 23361 22216 22832 22308 22923 22711 23019 22123 23050 23048 23457 22027 22982 22369 23264 22465 22775 22122 23212 23048 23477 22482 22515 21947 22423 22551 23561 22567 21940 22835 24088 23174 21976 21984 22460 23060 23224 21612 21783 22988 24240 23143 22004 21859 22320 22743 23556 22359 21764 21900 23344 23861 23660 21700 22204 22576 22794 22995 21952 21552 22886 23878 24023 22371 21896 22609 22530 23114 22700 22628 22607 23472 22998 23045 22400 22840 22439 23118 22741 22436 22305 22983 23011 22887 22320 23352 22597 23163 22698 22644 22285 23233 22923 23388 22082 22982 22424 23247 22819 22760 22154 23200 22790 23513 22201 22945 22668 23196 22487 22763 22249 23366 22841 23456 22136 22896 22344 23220 22685 22839 22018 23368 22841 23272 21903 23464 22292 23438 22144 22912 22392 23766 22672 23018 21952 23314 22279 23342 22448 22718 22183 23433 22845 23208 21879 23022 22129 23441 22370 5807 16682 19905 19992 21120 20032 20931 20329 21504 21001 31392 25360 25556 23672 23557 22780 18105 20214 21672 20880 21929 21787 22616 21357 22254 32145 26545 23979 23815 23207 24307 17617 20884 21126 22193 21792 22545 21485 22505 22252 23082 25112 24407 23256 24071 22918 16531 20829 22774 22013 22283 21964 22581 22373 22487 21950 26528 24039 23312 22839 23461 22865 21719 21836 23211 22656 22529 22170 22826 22594 22853 24476 23661 23753 23452 21959 23037 22997 23374 21766 22392 23417 24288 22713 22082 22309 23030 23212 22213 21672 23949 23717 22253 21916 22733 23187 22615 21532 23208 23904 23408 21726 22646 22653 23474 21830 22036 23647 23522 21607 22412 22448 23488 22068 21865 23376 24065 22258 22055 22197 23463 21795 22008 23538 23992 22264 22362 22816 22742 23275 22309 22740 22933 23437 22320 22857 22371 23170 22901 22609 22540 23357 23104 22630 22456 22784 22801 22972 22392 23111 23147 22958 22249 22950 22519 23322 22324 22809 22813 23570 22743 22676 22485 23015 22694 23112 22183 23457 23075 22960 22320 23079 22538 23249 22065 22935 22932 23555 22215 22752 22297 23276 22501 22880 22676 
21513 21712 21776 21429 21928 21471 22375 21315 22187 20988 22672 20869 22199 20659 22981 20481 21689 21251 22102 21846 21426 21904 21071 22495 21086 22138 20665 22904 20699 21805 20696 22890 20635 21817 20623 22808 20816 21922 22443 21345 22069 21847 22264 21362 22485 21993 21982 21604 22199 21747 22061 21192 22579 21975 22122 21578 22227 21837 21916 21349 22584 21997 21968 21175 22259 21725 22443 21195 22283 22053 22337 21209 22070 21920 22218 21384 22539 22062 22321 21100 22327 21728 22467 21287 22263 22130 22307 21279 22228 21792 22181 21255 21729 21466 21196 21037 21317 21393 21209 20924 21850 21413 21169 21159 21431 21237 20754 22071 22324 20367 21099 21716 21293 20320 22227 22276 20543 20763 22024 20778 20588 22144 22378 20381 21146 21641 21224 20366 22335 22065 20360 21007 21903 21069 21011 22050 21392 21271 21024 21718 21088 21489 21641 21679 20819 20774 21448 21486 20848 21955 21509 21358 21158 21745 20786 21681 21659 21519 20900 21601 21386 21325 21317 22136 20919 21441 21161 21783 20896 22066 21416 21310 20960 21852 21042 21585 21493 21881 20823 21627 21321 21379 21040 22027 5336 9855 10838 12654 12068 14073 13870 14397 14119 15017 31641 28208 26335 25415 23362 23745 22868 22954 22129 23354 22049 22592 21912 22538 21470 22929 21917 21946 21664 22476 21345 22479 22240 22158 21750 22183 21833 21846 22042 22471 21303 22048 21888 21911 21418 22241 21114 20668 20971 21727 20189 22496 21632 20548 21004 21973 20189 21232 22560 20945 20676 21443 21312 20470 22139 22277 20482 21056 21811 20457 21229 22722 20776 21101 21589 21123 21234 21513 21733 21017 21589 21393 21095 21563 21661 20920 21444 21271 21207 21422 21960 20776 21551 21320 21099 21028 22099 21136 21316 21060 21778 20761 21978 21557 21294 20992 21831 20979 21591 21556 21366 20850 21850 21056 21341 21417 21928 20800 21605 21505 21576 21511 21940 20753 21677 21383 21583 21031 22221 21305 21637 21225 22008 20832 22081 21428 21316 20843 21844 20784 21600 21656 21585 21053 21788 20936 21539 21729 21475 21191 21704 21067 21625 21692 21329 20762 21821 21076 21469 21889 21627 21039 21556 21383 21271 21838 21678 21025 21819 21109 21281 22515 20745 20743 22055 20696 21696 22471 20589 21104 22066 20292 22737 20943 21763 22017 20759 21665 22460 20617 21257 14626 12566 15112 16227 15537 16544 17384 16829 18120 17099 32101 27882 25358 24711 23488 22584 22986 22146 22696 22243 22022 22098 22022 21967 22642 21427 22222 21718 22053 22157 21885 21556 22420 21337 22732 21332 22227 21872 22007 22077 22021 21487 22507 21191 22624 21543 22075 21601 21863 21912 22100 21433 22400 21251 22309 21778 22036 21751 21920 21798 22400 21363 22218 21490 22177 21898 21841 21719 21833 21961 22265 21319 22401 21105 22493 21624 22021 21653 22007 21778 22368 21555 22167 21192 22601 21399 21991 21828 21747 22053 21769 21586 22315 21303 22649 21514 22317 21807 21733 22233 21755 21613 22159 21396 23017 20840 21424 21344 20961 22563 20524 21223 21589 21932 21996 21012 22283 20370 22843 20992 21393 21860 20758 22656 20557 21324 21010 21302 22222 20407 21338 21184 20882 22087 20830 21461 21312 21267 21580 21198 21320 21343 21351 21739 20896 21665 21026 21697 21450 21309 21253 21290 21337 21783 21149 21753 20756 22077 21017 21591 21323 21267 21699 21319 21115 21773 21036 21623 20864 21844 20693 22150 20820 21597 21218 21553 21485 21257 21022 21437 21561 21529 21101 21894 21037 22231 20903 21867 20929 22259 21112 21869 18007 19948 19392 20168 19671 20650 20143 20489 20332 20485 23491 22875 22261 22196 22121 22149 21496 22235 21281 22418 21120 22163 21184 22454 21338 21719 21531 22007 21959 21673 21680 21381 21827 21655 21340 21993 21332 22109 21284 22060 21105 22470 20816 21852 21056 22236 21549 21253 22076 20769 22404 21004 22119 20656 22642 21146 21098 21870 21115 22493 21064 22103 20368 23021 20519 21735 20637 22644 21093 21358 21709 21284 22245 21061 21900 20970 22194 21100 21603 21104 22058 21362 21041 21737 21233 21794 21302 21386 21394 21651 21799 20789 21989 21022 22215 21207 22125 20972 22290 20858 21732 21080 22128 21242 21639 21481 21737 21620 21681 21387 21565 21755 21531 21277 21609 21487 21642 21088 22055 21019 22124 20994 21991 21060 22244 20818 21921 20983 22282 21197 21797 21325 21701 21624 21504 21376 21373 21703 21496 21272 21327 21690 21346 21295 21681 21616 21888 21070 21941 21185 22044 21199 21860 20998 22151 20986 21767 21127 22255 21190 21658 21473 21847 21504 21506 21613 21671 21829 21480 21715 21047 22682 20641 21414 21010 22288 21004 21187 21399 22024 21703 21191 21964 21649 21979 21016 22155 20849 22714 20769 22063 17209 21108 19209 20568 19415 21811 19930 20491 20925 20839 23075 22173 22151 22032 22004 21542 21974 21413 22188 21405 22008 21248 22065 21351 21977 21031 22245 21230 21960 20976 22129 20882 21784 21160 22209 21098 21773 21072 22283 20749 21788 20949 22294 20875 21813 20807 22236 20805 21941 20905 22126 20839 21661 20986 22161 21140 22005 20808 22333 20960 21889 20908 22375 21088 22117 21016 22244 20945 21763 20918 22374 21044 22109 20995 22381 20985 21995 21002 22354 21166 22041 21147 22099 21132 21949 21088 22203 21299 21975 21217 22152 21467 21956 21165 22064 20880 21670 22056 21264 21649 21162 22605 20688 21914 20760 22784 20949 21983 20697 22740 21116 22182 21361 21810 21424 21462 22535 20714 21575 20520 22991 20709 22068 20576 22742 21022 22192 21163 22055 21813 21315 22181 21207 21838 21113 22205 21176 21915 21328 22277 21312 22005 21443 21963 21307 21800 21804 21519 21475 21449 21765 21913 21609 21870 21461 21760 21423 21993 20968 21915 20904 22279 21179 22045 21143 22145 20906 21987 21565 21883 21143 21684 21740 21529 21397 21516 21836 21625 21613 21757 21736 21862 21424 22258 21192 21904 21262 22345 21073 22126 20969 22390 20231 21136 20468 21525 20695 21095 21415 21129 21166 23281 22444 22121 21853 22112 21650 21775 21549 22133 21281 21859 21072 22344 21292 22016 21250 22241 21196 22091 21297 22136 21291 22080 21780 21307 21461 21022 22617 20778 21923 20761 22677 21006 22184 21152 22252 20709 21575 22208 21184 21472 20828 22723 20832 21457 20736 22912 20682 21877 20541 23034 20492 22218 21087 22261 21431 21713 21795 21533 22069 21472 22083 21318 21698 21346 22200 21294 21836 21142 22110 21351 21904 21628 21772 21180 21691 21703 21567 21398 21493 21789 21473 21578 21441 21820 21677 21580 21767 21719 21864 21572 21638 21744 21625 21551 21716 21773 21703 21569 21849 21613 22032 21491 21794 21675 21838 21657 21736 21712 21728 21430 21738 21591 21840 21511 21497 21789 21513 21489 21578 21853 21647 21447 21860 21621 21880 21195 22173 21158 22321 21128 21959 21000 22176 21367 22152 21601 21452 21883 21440 21452 21483 21706 21917 21413 21998 21015 22291 21281 21622 21648 21512 21895 21646 21605 21318 22048 21676 21084 22208 20694 22416 21703 21127 21988 20488 22659 21302 21549 22199 20305 22774 21229 21335 22187 20551 22753 21402 21470 22263 20376 22671 21344 21379 22212 20940 22255 21471 21630 21606 21498 22039 21410 21447 21881 21326 22221 21186 21724 21623 21555 21862 21591 21465 22000 21147 22294 21241 21608 21626 21480 21901 21712 21479 22066 20961 22189 21472 21661 21541 21576 21733 21866 21415 22133 21041 22400 21112 21652 21485 21543 21750 21499 21276 22071 21107 22456 21228 21738 21477 21745 21592 22039 21088 21996 20989 22132 21607 21626 21566 21488 21492 21988 21228 21975 21099 22250 21466 21858 21564 21458 21873 21552 21660 22009 21208 22281 20982 21773 21625 21486 21876 21431 21322 21955 21073 22253 21072 21689 21616 21374 22209 21201 21401 22164 20639 22724 20855 21696 22140 20570 22780 21322 21219 22293 20425 22573 21745 21325 22055 20742 22388 22072 21124 21829 21285 21825 22119 21085 21936 20838 22086 21853 21562 21316 21984 21077 22225 21489 21920 21705 21325 21824 21823 21240 21795 21355 21856 21948 21440 21332 21984 21021 22289 21137 21369 21511 21391 21578 22137 21177 21909 21351 21646 21917 21526 21320 22120 21047 22353 21335 21828 21574 21755 21418 22444 20873 21774 21571 21504 21680 21962 21280 22044 21104 22361 21495 21568 21326 22029 21076 22429 21360 21738 21382 21740 21145 22208 21008 21662 21489 21629 21516 22185 20884 21827 21401 21552 21808 21732 21176 21790 21369 21685 21911 21498 21326 22036 21063 21832 21852 9890 14681 14576 14523 15568 15882 15887 16179 16653 33212 28954 26750 22641 22213 22933 22478 21805 23304 23024 21356 22168 22538 20967 23023 23168 21152 4515 11977 14837 15177 18073 17879 16887 17866 18848 19928 25856 27061 25819 23585 23649 23446 22080 22699 22820 22880 21781 22407 22101 22436 21505 21888 22073 17105 17783 19153 19521 19688 19860 20864 20153 20113 20077 24404 22686 22135 21932 22613 21592 22066 21681 22317 21271 22034 21917 22295 21045 21684 21294 22167 18204 19968 20349 21140 20024 20876 20348 21335 20174 20792 22763 22672 21285 21984 21315 21929 21057 21677 21560 22208 20943 21735 21112 22022 20946 21697 21515 20943 20231 21252 20866 21322 20467 21319 21240 21709 22137 21991 21328 22065 21052 21589 21724 21819 20893 21517 21400 21717 20831 21660 21687 21484 20961 21392 21390 21518 20873 21879 21669 21627 20903 21425 21312 21830 20829 21487 22043 21520 20445 21222 21446 21948 20909 20456 21743 22859 21644 20481 20917 21489 21599 20426 20606 22573 22473 21238 20349 21065 21341 22029 20992 20428 22122 22718 21472 20452 20893 21081 22039 21353 21242 21036 21860 21736 21773 20960 21349 21289 21611 21497 21287 20992 21771 21834 21890 20998 21379 21197 21858 21200 21351 21049 22025 21744 21708 20950 21767 21210 21883 21095 21346 21322 22042 21468 21253 20864 21573 21365 21925 21017 21408 21073 22107 21646 22213 20953 21735 20983 21913 21457 21559 20917 21750 21773 22165 21354 21328 21114 21767 21384 21682 20913 21840 21622 22307 21256 21501 21229 21687 21504 21984 21212 21657 21595 22278 21474 21616 21099 21927 21413 22085 21145 21512 21183 22260 21879 22069 20942 21649 21447 21899 21596 21545 21200 21913 21927 22116 21323 21603 21290 21906 21735 21829 21248 21959 22023 22140 21177 21497 21285 21932 21703 21728 21088 22055 22673 22320 20857 20936 21028 21784 22067 21897 20664 20777 22545 22925 21639 20777 21069 21481 21773 22349 21617 20769 20910 22034 22964 22374 21014 21208 21417 22199 21953 20791 21018 22416 23005 22529 21065 20539 21520 21395 22059 21645 21625 21230 21938 21920 21835 21127 21660 21560 21993 21785 21655 21318 22008 22092 22350 21266 21568 21558 21953 21648 21668 21091 21900 21926 22519 21569 21548 21700 21984 21653 21815 21109 22153 21984 22145 21132 21744 21288 21896 21525 21985 21137 21593 21394 22327 21783 22016 21069 21765 21501 22221 21310 21723 21408 22506 21797 21867 20939 21896 21356 22133 21115 21671 21369 22311 21851 21883 21088 21779 21264 22044 21504 21967 20979 21911 21814 22457 21604 21664 20660 22071 21571 22032 21104 21817 21623 22480 21661 21524 21204 21744 21623 21949 21108 21818 21702 22413 21752 21685 21264 21820 21495 22296 21191 21765 21897 22431 21533 21494 21351 21856 21583 21989 21441 21555 21685 22357 21770 21640 21227 21763 21543 22027 21350 21483 21541 22229 21879 21647 21208 21725 21616 22027 21264 21452 21548 22540 21803 21417 20950 21613 21772 22184 21160 21271 22549 23000 21083 20893 21711 21721 22347 21579 20577 21120 22452 23127 21492 20831 21104 21511 22038 21864 20645 21078 22486 23046 21832 20870 21072 2265 11045 13463 13289 13820 15216 16812 16891 15608 15324 32439 28685 25533 23575 23914 23930 12236 15099 16430 17547 17850 18354 17849 18880 18983 33632 27688 25170 24256 23764 22915 13005 16571 18793 18965 19047 19336 19607 19765 20126 32247 27655 25186 24112 20884 21540 19083 20490 20127 20445 20689 21239 20620 20608 20413 21134 22447 22044 21981 22247 21219 19999 20485 21314 20864 20885 20858 21696 21133 20900 20897 22037 21688 21792 20977 22101 21632 21513 20772 21648 21226 21958 20904 21437 21275 22209 21239 21453 21368 21802 21123 21292 21071 22140 21369 21320 21123 21658 21319 21527 20790 21771 21689 21667 20968 21076 21299 21915 21079 22027 21536 22092 20864 22134 21530 22248 21067 21828 21869 22164 21024 21779 21413 22213 21078 21820 21781 22241 21234 21453 21195 21975 21531 21467 21296 22561 21506 21628 21103 21896 21328 22019 20967 21828 21670 22408 20971 21859 21153 22042 21102 21570 21914 22162 21240 21397 21313 21880 21493 21543 21086 22077 22029 21972 20979 21514 21491 21894 21154 21581 21974 22007 21281 21547 21440 21872 21559 21445 21253 22149 21831 21511 21321 21733 21483 
21468 22126 21488 22174 21493 22212 21242 22368 21233 21998 21301 22313 21300 21904 21636 21945 21788 21904 21741 21696 21964 21789 21613 21664 21929 21849 21553 21710 21797 21982 21459 22024 21591 22018 21440 21934 21493 22105 21973 22176 21340 22391 21377 22224 21235 22524 21259 22199 21177 22464 21257 22197 21208 22385 21291 22024 21169 22365 21202 22064 21250 22413 21216 21901 21287 22389 21392 21784 21376 22415 21445 21866 21763 21849 21904 21614 21884 21672 21367 21873 22056 21601 21463 21605 21901 21804 21271 21904 22029 21542 21506 21866 21852 21519 21409 22276 21930 21610 21404 22079 21784 21644 21591 22352 21772 21804 21465 22181 21319 21776 21999 21869 21303 22003 21803 21701 21473 22299 21290 21916 21472 22228 21216 21860 21899 21917 21260 21882 21712 21744 21719 22486 21440 21893 21677 21975 21178 22119 21770 21697 20711 22050 21584 21633 21681 22517 21339 21784 21451 22222 21193 22305 21844 21701 21410 22161 21464 21715 21937 22093 21341 21803 21795 21736 21463 22377 21427 21646 21671 22194 20800 22027 22620 21425 21191 22322 21553 20877 22423 22744 20812 21539 22251 21499 14157 18665 18304 18829 19281 20729 19090 19912 21431 34485 25036 23447 22791 21689 22234 22225 21593 21203 21872 21734 21457 22144 21785 21644 21689 21873 21389 21850 22204 21301 21806 21845 21779 21294 22217 21561 21797 21540 22136 21239 22002 22016 21593 21801 22145 21952 21641 21893 22356 21227 21905 21737 21691 21719 22424 21229 21863 21721 21917 21264 22349 21661 21956 21571 22257 21208 22040 21864 21616 21392 22251 21511 21774 21992 22025 21369 21975 21632 21683 21897 22229 21232 22011 21728 21633 21909 22265 21243 21784 21846 21730 21628 22317 21173 21901 21641 21952 21285 22290 21667 21719 21409 22189 21176 22016 22249 21323 21813 22496 20836 21800 22949 21645 21160 21844 22111 20793 21991 22848 20830 21536 22242 20777 22288 22827 20969 21824 22077 21929 20691 22941 21944 21265 21765 22056 21497 21783 22297 21341 21771 21913 21734 21459 22222 21751 21715 21797 21719 21406 22199 21520 21760 21797 21735 21608 22280 21419 21889 21717 21956 21275 22259 21651 21722 21473 22129 21261 22361 21499 21745 21668 21840 21410 22421 21401 22127 21731 21709 21584 22319 21175 21856 21723 21824 21955 21701 21483 22295 21297 22085 21959 10779 18259 20453 19989 21191 20881 20968 20752 21364 20774 27485 23028 22647 21911 22007 22037 21861 21387 22144 21213 22237 21408 21738 21795 21600 21792 21960 21484 21988 21455 21890 21965 21673 21544 21792 21584 22343 21051 21989 21454 21610 22613 21184 21459 22251 20822 23153 20835 21662 21869 21164 22839 21089 21243 22408 20577 23001 21102 21495 22309 20860 22744 21717 21445 22585 20620 22968 21008 21599 22089 21287 22313 21462 21767 21988 21418 22162 21512 21613 22051 21408 22157 21391 21584 21604 21805 22114 21555 21595 21895 21668 22330 21324 21920 21675 21684 22045 21573 21573 22071 21528 22229 21490 21931 21449 22145 21965 21784 21707 21799 21617 22353 21463 22181 21128 22307 21250 21820 21736 21653 21914 21785 21504 22049 21562 22197 21383 22312 21254 22287 21745 21882 21682 21778 21684 22250 21348 22241 21137 22352 21413 21829 21758 21713 21909 21952 21445 22246 21253 22224 21317 21860 21704 21673 21997 21709 21552 22173 21457 22434 21272 21873 21511 21928 21895 21856 21960 21576 22316 21237 21651 21550 21880 22419 21216 22393 20608 22650 21712 21491 21866 21590 22651 21362 22144 21031 22454 21504 21230 22177 21389 22197 17275 20615 20573 21952 20783 21953 20664 21756 21185 30592 23723 22743 21840 21708 21954 21450 22144 21613 21894 21299 22069 21355 21728 21764 21816 22001 21977 21900 21540 22016 21625 21616 21881 21547 22246 21435 22119 21259 22373 21306 22016 21488 22180 21575 21847 21756 21686 21960 21638 21575 21639 21847 21733 21397 22128 21417 22347 21301 22107 21174 22336 21230 21893 21376 22160 21521 21824 21639 21741 21875 21846 21692 21653 21816 21811 21377 22119 21455 22347 21382 22241 21281 22481 21141 22041 21323 22203 21450 21843 21826 21752 22024 21645 21655 21707 21894 21709 21471 21936 21705 22091 21456 22251 21392 22493 21233 22332 20925 23015 20842 22190 20982 22544 21403 21468 22017 21592 22362 21456 22182 20848 22816 21181 21287 21550 22405 21537 21248 22165 21209 22857 21240 22501 20544 23008 20946 21703 21440 22053 21539 21543 21707 21860 21746 21584 22075 21568 22096 21547 21949 21463 22312 21395 21797 21480 22097 21504 21777 21869 21813 21892 21836 21865 21714 22025 21535 21760 21604 21938 21762 21408 22022 21655 22200 21894 22243 21368 22322 21395 22223 21295 22477 21296 22279 21129 22316 21159 22057 21201 22263 21333 16828 20274 21636 21271 21649 21421 21657 21645 21588 21413 24520 22566 21981 21944 21803 21880 21863 21648 21559 21936 21728 21723 21576 21864 21707 21598 21669 21904 21645 21576 21905 21645 22044 21409 22135 21425 22253 21428 21905 21999 21614 21466 21681 22126 21620 21250 21552 22231 21604 21404 21648 22250 21627 21409 21127 22746 21075 21806 20969 22737 21109 21509 21252 22579 21193 21456 21331 22344 21529 21728 21599 22295 21415 21796 21467 22187 21404 21837 21540 22246 21344 21871 21373 22249 21431 21832 21477 22187 21394 21989 21307 22357 21465 22197 21248 22389 21024 22099 21686 21953 21445 21867 21800 21831 21464 21800 21865 21728 21520 21706 21946 21637 21697 21568 21898 21730 21686 21854 21565 21819 21456 22204 21288 21947 21222 22402 21253 22087 21169 22146 20819 22183 21384 21979 21367 21856 21869 21768 21600 21675 21939 21713 21686 21641 21955 22134 21587 22249 21258 21964 21205 22294 21432 22259 21208 22400 21488 22229 21802 21767 21553 21572 22402 21344 22048 21044 22587 21430 22344 21251 22137 21431 21859 22170 21365 21764 20796 22993 20866 22330 20589 23064 21245 22419 21477 22039 21287 21495 22473 21063 21942 21268 21194 21126 21830 21293 21833 21417 21740 21931 21441 24514 22010 22272 21683 21912 21511 22099 21657 21943 21897 21754 21840 21496 22317 21355 21955 21367 22332 21328 22069 21249 22269 21301 22094 21480 21891 21463 21979 21838 21742 21528 21751 21868 21648 21578 21605 21955 21867 21811 21766 21839 21931 21804 21867 21729 21917 21596 22135 21465 21969 21469 22236 21352 22038 21203 22480 21345 22247 21184 22443 21364 22150 21356 21984 21348 21969 21699 21680 21457 21734 21893 21830 21767 21733 21933 22303 21816 21947 21618 21809 21568 22140 21337 21896 21312 22361 21235 22217 21037 22471 21060 22259 20788 23040 20933 22406 20580 23053 20888 22433 20437 23117 20939 22532 20487 23136 21128 22451 20572 23001 20777 22481 20583 23083 20873 22068 20943 22639 21213 21479 21803 21588 21945 21591 22050 21464 22269 21657 22016 21337 22095 21579 21597 21931 21633 22158 21472 21667 21797 21668 21776 21504 22036 21349 22277 21277 21876 21760 21978 21892 21703 21661 21611 21968 21626 21453 22181 21211 22332 21386 21946 21801 21640 21895 21831 21419 22120 21307 22384 21305 21881 21754 21761 21991 21779 21392 22155 21305 22467 21201 21932 21680 21725 22016 21669 21485 22093 21296 22422 21199 22019 21564 21985 21846 21816 21461 21952 21501 22393 21300 21857 21609 21895 21845 21745 21531 21985 21360 22373 21222 21909 21559 21763 21984 21661 21415 22229 21083 22574 20921 21896 21820 21316 22679 21157 21408 22137 21313 23097 20868 21648 21640 22046 22304 21234 21764 21782 20971 23080 20992 21506 22215 20893 22839 21201 21351 22603 20741 22209 21574 21568 22088 21387 22293 21448 21681 21961 21463 22103 21420 21674 21889 21417 22282 21351 21971 21464 21993 21908 21781 21762 21936 21548 22260 21429 21968 21622 21984 21980 21681 21587 21929 21309 22315 21145 21789 21655 21770 21968 21713 21415 22072 21238 22448 21244 21852 21798 21696 21930 21810 21352 22356 21150 22428 21558 21877 21730 21660 21861 21812 21504 22217 21287 22074 21824 21764 21457 22183 21229 22420 21238 21909 21755 21717 21783 21970 21738 22169 21266 22040 21945 21751 21671 21904 21533 22445 21203 21921 21718 21597 21921 21961 21463 21986 21344 22035 22104 21294 21739 21914 21067 23010 20993 21454 22482 20912 22017 22634 20983 21625 22048 20988 22892 21393 21376 22506 20592 22838 21719 21433 22011 22092 20900 23040 21206 21129 22012 21467 21760 22112 21555 21569 22069 21363 22007 21984 21722 21723 21743 21447 22214 21649 21624 21953 21511 21745 22332 21323 21889 21943 21593 16263 19724 19332 20523 20183 20332 20220 21096 20144 30404 24699 23232 22349 22701 21632 21774 21511 22141 21064 22180 21829 21701 21475 22137 21249 21852 11613 18707 19888 20738 20921 20842 20867 21731 20720 21219 27284 24029 21844 22454 22049 21777 21593 22032 21663 21628 21454 22438 21632 21690 21424 22183 21437 15300 19833 21075 20601 21389 21260 21573 20896 21805 21713 25283 22684 22407 21943 21810 21329 22345 21786 21664 21335 22102 21645 21504 21722 22409 21609 21420 18295 21163 21297 20678 21304 22820 21731 21008 21349 30298 23840 21416 21799 23187 21497 21115 21351 22182 22105 20876 21259 22977 22117 21092 21399 22377 21498 19491 21608 22711 21389 21354 21572 21853 21824 21285 24601 22737 22039 21489 21360 21712 21888 21395 22037 22153 21647 21431 21721 21869 21777 21338 22065 22197 21638 21688 21805 21921 21847 21255 22138 22064 21964 21276 21778 21713 21933 21170 22071 21987 22099 21259 21846 21404 22237 21547 21621 21537 22342 21570 21860 21941 21962 21841 21809 21228 22069 21927 22344 21300 21790 21400 22189 21416 21643 21483 22291 21933 21765 21393 21856 21564 22324 21517 21684 21509 22388 21776 21704 21369 21930 21419 22176 21520 21721 21495 22391 21762 21681 21504 21749 21681 22183 21284 21697 21632 22404 21828 21743 21668 21844 21780 22041 21154 21824 22045 22514 21268 21371 21510 21775 21991 22535 21516 20952 21059 22983 22537 21624 20955 21908 21415 22502 21878 21120 20625 21856 22817 21866 20938 21654 21373 22533 22080 21060 20744 22253 22807 22692 21254 21313 21330 21599 21960 21669 21444 21658 22107 22156 21729 21467 21761 21595 21938 21914 21702 21417 21845 22048 22211 21703 21633 21543 21920 21835 21901 21286 21574 21885 22228 21698 21499 21536 21811 21770 22072 21232 21797 21799 22323 21730 21552 21872 21804 21803 22075 21267 21747 21796 22423 21830 21712 21319 22313 21424 22313 21475 21607 21591 22363 21924 22077 21341 21666 21366 21959 21793 21993 21236 21888 21723 22476 21450 21779 21533 22029 21856 22094 21249 21753 21659 22396 21959 21834 21339 21885 21480 22290 21297 21733 21496 22410 21831 21970 21180 21615 21461 22276 21671 21723 21405 22321 21931 22043 21299 21834 21466 22045 21719 21820 21263 22052 21938 22120 21305 21754 21483 22224 21528 21592 21528 22292 22007 22036 21058 21826 21415 21946 21813 22216 21207 21099 21548 22941 21617 21201 21181 21737 22327 22007 20558 21360 22480 23010 21843 21139 21413 21608 22299 22345 20718 21072 21849 23056 22400 21638 20884 21398 21406 22491 22023 21043 20809 22700 22907 22167 20925 21488 21261 22045 22235 21595 21434 21601 22128 21974 21549 21537 21777 21683 22030 21712 21490 21620 22139 22214 21852 21435 21661 21685 22033 21614 21470 21711 22099 22096 21833 21373 21908 21489 22061 21656 21461 21529 22097 22098 22080 21279 21901 21508 22128 21807 21622 21544 22188 22012 21810 21212 22249 21460 22124 21661 21660 21362 22076 22016 21935 21326 21787 21565 22236 21365 21723 21672 22476 21780 21667 21367 21840 21607 22304 21456 21563 21488 22317 22104 21818 21348 21876 21456 22200 21484 21730 21335 22375 14039 18547 19072 19910 20064 20836 20484 20608 20080 21077 26758 23837 22199 22343 21888 11259 18060 20320 20935 21532 20737 21306 20791 21560 20933 27152 23603 23225 22041 21879 21736 18760 20419 21330 20745 21449 21565 21996 21045 21525 27826 23984 22192 21835 21997 22576 18153 20475 20859 21657 21490 21680 21074 21900 21861 21735 23352 22619 22003 21831 21305 19558 21102 21454 21226 21685 21668 21974 21013 21913 22080 23744 21461 21928 21808 22314 20952 21415 22477 22924 21253 21383 21600 22055 22320 21413 20588 22555 22829 21751 20924 21515 22212 21837 20608 21941 22829 22288 20841 21509 21571 22663 21073 20985 22176 23043 21599 21360 21456 22656 21480 20811 22122 23081 21546 21125 21258 22355 21871 20857 22080 23024 21417 21278 21273 21879 21998 21377 21588 21972 22315 21658 21623 21607 22080 21813 21463 21593 22144 22153 21613 21545 21689 21847 21976 21376 21712 22119 22120 21329 21677 21762 21975 21431 21670 21941 22349 21709 21575 21519 21789 21860 21842 21335 22054 22103 21740 21427 21765 21704 22025 21317 21779 21868 22260 21415 21617 21495 22116 21799 21703 21444 22344 21665 21653 
42539 40212 42890 40679 43208 40967 40647 42334 40504 38792 40978 41935 41030 37383 34276 37820 36121 37201 35817 34897 37988 36279 34283 34435 37572 36881 33370 35227 36136 38385 42637 38753 34155 38279 42176 38071 43056 39878 38279 40192 41528 42920 41860 40912 40560 44242 40856 40887 39905 43251 40684 40777 40130 42631 41168 38714 39586 42560 40145 39080 40247 43008 40237 37604 40854 42822 41905 36187 41363 43168 42715 37315 35772 36800 37192 38393 36080 33543 37394 37888 34506 34227 37100 36632 40583 38708 35664 39063 41721 41269 40272 43572 40839 40800 39424 33357 38580 38999 40390 40493 42392 35890 34851 37744 36188 36866 36816 34560 37736 34009 42726 37137 41060 38775 36441 35176 42536 41888 40986 37760 42537 41103 40121 37056 37404 37680 40449 37400 35168 35483 35484 43446 42436 37536 35052 38257 39751 40009 35973 35004 34793 38728 33722 34080 34752 43796 41744 36197 42517 41216 40043 41680 36884 35215 41803 40274 42697 35651 37670 39578 41601 36582 36152 35520 42632 42752 42496 34887 34837 40327 35492 38712 34720 41952 40148 41888 33589 36331 42925 36231 35677 33175 41138 43310 37480 33413 39215 35267 39750 35016 37685 36731 42337 39457 39896 43751 36825 35084 40944 40992 34176 39917 37085 35621 42363 39984 36195 34452 34972 36957 41856 37074 40704 41081 36608 36771 35944 40854 41011 33774 36088 33132 39713 40628 38656 38392 34054 36098 39816 37897 34498 37141 42097 40613 37472 35685 35145 35459 42650 40665 37287 35477 37581 40279 42393 35061 37851 33689 41036 40123 38912 37004 34105 41442 41522 33197 35848 38320 38680 41808 38557 34201 34860 37216 40960 40328 38951 35447 34169 37344 41412 40784 36117 36751 35448 34396 41728 39873 37585 34480 37665 40740 41500 34973 35448 41821 40823 39767 38464 41283 41425 36536 43441 36173 36146 38241 34626 39282 36800 39851 35611 38517 36993 36016 32988 40789 35440 41159 37158 37511 36299 39381 37778 34456 38173 37833 40403 35960 38869 43125 36405 41496 41696 36184 37479 35648 42467 41227 36132 35367 36130 35457 42000 40960 33009 35356 36124 35681 34024 41056 42406 37364 35437 37821 40720 41505 34768 35377 42525 40060 40671 42457 43424 36023 34640 36420 41884 43059 42216 40297 35720 35360 33593 41780 40004 36874 35562 36295 37944 35255 42848 41847 40989 39564 38236 31744 39012 42521 37747 39949 36436 37360 34774 41439 35412 45649 39538 35236 37478 38785 38872 37073 41832 39953 40359 41344 41997 35915 36120 33821 35821 37897 42901 38579 42791 37369 38253 34932 33153 35753 33607 41944 38640 38512 42629 34496 34412 39420 42688 41565 36038 40403 36137 34791 37078 39552 37260 38664 40654 42725 33296 38743 39057 43204 41946 36555 35992 35340 42284 34466 33398 38257 37607 34283 39280 40920 41911 42838 36183 38278 42183 40295 32977 34151 38807 41867 40448 42148 33920 33880 36272 39560 33630 33927 37191 34725 41804 41392 37603 35001 34829 38887 33792 33541 39140 33145 40773 43016 38082 42496 40128 38359 36055 35309 36234 34185 41905 42987 40668 39170 41733 40386 36677 35539 34561 37360 36106 32527 38627 33672 40427 41966 41836 40524 41782 35888 37240 34869 35747 34870 41089 41561 41240 39296 42087 42292 36820 36036 35225 37385 37768 42435 41402 40525 40887 41249 37088 35146 34792 38540 35481 33187 40225 42619 43151 40752 37232 32974 37432 37360 36759 37974 33703 41590 40616 34757 33369 37019 42743 40203 42841 33423 34886 35025 42816 37264 33968 34982 41398 39959 38249 43300 32887 40220 40375 42068 40813 39074 33589 33024 37554 35568 37786 34064 35769 39607 48039 37106 36184 36501 35276 37782 42484 39988 34496 37126 40853 39380 41735 35587 35588 36321 38444 38340 37397 33216 38151 34457 33969 37120 33481 40977 42624 40123 40631 42592 41237 38516 42776 40576 33984 36780 35895 34993 37868 34455 33676 34344 36791 35610 41782 39904 42279 42432 41201 39904 39787 41898 40636 37416 41388 40168 33074 36168 34432 35744 37090 36805 35110 34515 36260 36328 41472 40055 42893 42480 41939 41240 40772 43600 39560 38971 41248 40977 42638 37015 36434 35761 38466 34673 34612 35245 37170 35418 42817 37845 35328 39428 42459 41574 41837 44010 40609 42144 37317 39171 36187 40581 37779 33506 41805 42931 38685 33984 42093 42598 40679 36131 36545 39812 40960 33677 42472 33392 39880 40313 40251 37389 40367 43928 32801 38603 37152 35319 42019 39223 33372 33227 35172 36811 35655 33591 39189 33546 39133 33586 37918 42742 41889 42052 36443 42672 39680 32715 35671 37124 36438 37096 36704 37031 35276 38557 33509 35360 33933 37576 35659 41704 38803 34822 40424 37336 41112 41813 41923 42092 41307 41251 43776 41021 41558 39321 41871 39808 39168 39953 41625 41477 34232 40264 34450 40468 34630 42112 34921 34487 33678 41858 45183 34333 38392 37861 36421 37120 37125 34342 33508 37445 35414 35509 33568 36784 35373 34050 34656 37103 34594 33529 37136 34620 38755 41989 40290 42283 41605 42389 37559 38792 34404 42506 35111 39911 34357 40049 33368 40939 34177 41824 34540 41120 34692 41793 39355 36224 38519 36497 37456 35929 38936 32973 39965 34270 39704 42481 41464 42201 33405 35207 34155 41448 42392 36352 42713 40844 42156 37039 33173 40975 41392 37513 41883 41453 42580 36786 42758 40853 41898 38657 41152 42434 42938 40895 40247 42784 38144 39559 35168 37794 42429 37384 36196 36649 42496 36386 37040 35368 32717 35048 37824 34444 34916 33349 37120 35529 34936 36928 33706 36443 42256 40945 40832 38194 40249 42629 40602 39623 39625 39963 36036 40460 41792 38596 41856 36944 37216 35745 33808 34826 37721 35308 34945 34343 37868 39930 34009 41088 40547 38284 40073 41613 42434 41601 40176 42504 43008 41240 36469 35879 33325 33388 42244 41449 38927 38218 34370 42102 42199 40541 40152 42532 37187 40309 41792 35916 35462 38636 36188 41883 33613 39208 40704 42948 43137 39154 40935 43257 43776 38806 37968 40432 40012 39189 36684 40896 36809 42097 35941 37781 42272 45099 39048 41108 35200 37312 32992 39329 34802 37867 37350 35880 36497 42856 42167 41873 38216 41827 42203 41264 39392 40269 41728 41152 39748 42877 37458 42729 38656 36864 35829 32961 35760 37031 34375 33604 33955 37828 37231 36365 35788 36819 37832 36308 37160 35463 37608 34010 39956 42776 38348 42849 41356 41625 38983 40073 43442 41652 41496 39766 43320 41848 40209 41718 38360 41421 38276 35248 34675 42313 35864 37201 36608 35879 35584 37785 41720 36567 38020 34240 36152 33383 39896 41456 37393 40816 42468 40621 40991 38424 43543 38595 41399 35520 38890 37136 42625 33308 39267 36515 42838 42579 40455 37380 33388 31808 39874 39125 43295 33347 38741 35354 43315 33575 39639 36425 39073 37427 35130 40093 43061 36608 33809 37761 34073 38688 42609 41825 34900 38218 41367 39885 34011 33992 37664 34282 40080 42679 35048 36137 34665 35626 32512 38459 41527 41481 40944 37281 35531 38233 37174 35349 34737 34187 37850 34436 42452 40641 40355 42127 41959 38160 36296 34312 37239 36696 42199 39920 41234 42547 41241 37461 35896 35618 38467 36038 41538 40357 41144 43524 40175 37892 34795 35552 38241 34890 42854 39815 40793 43011 40394 38708 33704 38154 36829 36379 42548 38000 43244 42965 41093 37036 34176 37254 36791 35704 33190 38108 41440 42626 40474 37621 33679 35603 38104 34876 42053 41185 38964 34243 36817 37197 36495 40960 35528 39394 41926 40215 41104 40056 36297 34321 34166 38884 41459 40471 35866 35913 37591 39586 37477 32732 40641 36852 37154 39845 41720 34717 34712 40509 33863 33280 39116 41924 41719 42580 35162 37984 42760 39936 42314 35122 37015 42105 41558 41829 38413 42586 38744 37417 36032 35601 37529 33463 41061 42466 38220 34432 38064 38357 34969 33774 37545 41152 42022 39561 36342 34677 35760 37905 35345 42066 39348 40532 43139 40777 37079 36192 34923 37606 36292 41360 42313 39712 43056 33810 37108 35456 34643 36896 36285 32544 40597 40981 39436 36429 35680 42368 40752 40585 42885 40688 37632 36032 35384 36052 38020 35702 40198 40503 38907 38007 36004 34887 37056 33328 43013 40248 37657 35443 34059 37381 38080 42768 38530 41255 38970 39584 41035 35988 37441 38603 38969 37550 42621 43694 36897 38468 34856 37676 34456 38581 37828 37763 41712 41633 44017 33461 36891 35493 42229 39050 39517 36706 38944 40071 39289 38826 42829 35815 39470 33611 33381 39017 41696 38968 38252 35548 35525 35866 42441 41026 34645 34199 37769 33001 35527 41863 41456 37312 37987 33968 39235 34680 40112 32549 39563 41319 40366 38880 39132 46346 36636 41115 42455 35912 34066 35890 32897 39958 38480 40379 36720 35221 42625 40259 40308 37061 30599 33384 36183 34602 36800 36050 36192 35532 34509 40044 43560 40320 36851 43211 39098 35968 33889 38378 34988 34347 42456 43285 34420 34976 41878 40741 42667 39098 36070 38492 33507 41672 40611 33871 36272 36390 35233 42320 35602 42658 38226 36314 41093 42272 36283 34544 41255 39751 34730 32465 35276 42583 34443 42009 40056 39748 40865 34392 40752 36886 35559 37496 41426 45404 37898 42024 36583 40792 43200 39461 41680 40641 39769 36464 40480 38656 39810 38800 42037 42722 43306 32277 33879 35605 41772 41750 33825 36864 36320 40657 35016 35800 38838 42920 41728 35380 36921 41808 39020 40155 34862 42262 35732 37139 35884 41245 39253 40716 34563 34859 36316 37465 36891 40424 40185 39072 38209 40672 36022 35227 37783 39522 39447 38496 39581 40597 36985 41943 41398 33689 34199 33016 41776 33754 36758 37798 38107 36680 36263 40253 39362 37877 41994 41025 36432 41761 40816 42200 34817 42833 41708 38064 35841 41649 36948 33632 41577 33288 34745 32743 42279 35971 35090 41600 37910 42275 40385 32999 35287 42985 43024 35912 34833 32466 35621 34817 40404 40743 35241 34060 42343 36697 35910 34618 36576 35872 38791 39366 36448 38983 43878 40704 42023 33112 35946 38501 33656 32755 36971 38384 38832 33616 34104 37276 37268 42184 44023 37492 38792 33578 36615 36660 36997 37093 34574 41741 33728 38928 38342 34840 41293 36948 35300 40192 41072 41312 34468 37859 34857 42157 34916 39653 40213 35616 42668 35872 34048 37576 37524 35238 41994 37032 38734 40807 35480 34186 33268 37233 36754 37440 40709 33897 37284 40870 35223 43031 33349 36224 35804 39073 40228 36369 36300 41785 35672 33210 36712 36295 36326 39318 40568 35984 36070 42872 36827 35156 41094 41856 42224 41970 42992 34555 33941 42250 37760 39429 41591 34911 41545 38340 36102 38440 40348 37169 35609 43352 42761 36257 33280 38613 36801 39552 40264 36060 34761 42581 38379 36699 41418 37605 42745 41581 40969 35822 42850 42968 36960 38067 39797 34643 42464 41408 35128 35488 41993 41963 38041 38997 40965 36825 42631 39256 35633 36443 40601 39048 37808 39776 41096 36097 42885 40970 33217 33680 32860 41137 38929 38748 38322 36497 42138 38148 36480 40668 40281 39117 33544 38118 34231 39718 40004 35840 41925 38939 33024 41208 43534 39175 36839 39200 42135 34349 41520 42277 35082 38266 36943 39168 42445 34624 36256 41815 42325 44012 38994 38261 35754 35504 37921 40333 37233 42711 40789 39190 41220 34306 42144 34240 39600 38330 33579 32984 35677 34925 38688 35226 42709 34528 40040 40899 37056 42432 35085 34944 38538 34413 42647 35800 39480 39407 36751 41848 37525 42852 39458 34670 42455 33432 39264 39508 39205 40936 37626 32778 39505 36626 34328 33119 40321 38866 36344 40073 41296 42704 40121 34966 34608 41377 39496 38431 38029 41329 36401 33708 40887 41830 35840 34722 43307 36161 34741 41668 36752 34234 41250 42540 33992 42551 42144 39735 36592 41332 37299 42324 40784 43040 35765 41335 42745 36224 32000 37280 36821 38190 35945 31680 32864 38231 38766 37632 37841 40802 42324 37225 36740 37191 40871 37335 33186 34471 40817 35719 33401 36864 41833 35350 41228 39029 37412 35456 34274 41864 41320 35057 42350 34008 38372 38276 33159 38978 39277 40454 36914 38656 33958 38128 42852 36660 34648 42668 35008 38358 37404 37012 35751 42368 34986 38507 36758 40964 33008 38803 42661 40516 35204 34615 38100 37881 37584 39122 36627 42560 37850 36213 41672 37384 42200 43867 38248 40347 41942 34055 38984 41688 42278 33526 33720 36873 35912 36948 33032 40472 36915 33160 37722 37068 41171 36250 32832 33469 34932 38331 37780 40217 39315 34341 41255 42560 35018 42577 36020 39802 39807 33476 38899 40454 42368 37524 36323 39096 39079 42192 40966 40768 37490 38635 41573 34049 37997 41877 34880 34390 34120 38960 36494 42666 34272 39652 40178 34496 33236 34916 36802 38157 41435 35383 39804 39820 41257 35234 35564 38256 42409 35080 37794 42264 35648 33764 33010 36032 36831 36616 41358 39200 39777 35841 42147 36033 35108 38542 41127 36170 37078 41239 42371 34489 42939 39914 36452 35288 42181 42224 34903 34526 
23240 23469 23206 23095 23456 23284 23566 22963 23610 23020 23717 22635 23733 22758 23873 22859 23579 22790 23792 22882 23311 23015 23592 23143 23451 23177 23375 23367 23473 23258 23221 23478 23287 23277 23144 23526 23141 23143 23207 23446 23215 23070 23280 23213 23264 23023 23532 23200 23502 22928 23668 22999 23650 22759 23639 23035 23597 22873 23710 22996 23679 22217 23765 22887 23821 23029 23720 22817 23888 22967 23736 22798 23853 22716 23461 22812 23747 22839 23391 23051 23590 23195 23328 23313 23343 23359 23380 23205 23152 23307 23280 22880 23664 23047 23629 22896 23740 22930 23756 23017 23673 22710 23873 22753 23325 22936 23575 23113 23287 23257 23256 23431 23426 23274 23158 23579 23063 23086 23203 23296 23265 22899 23525 23028 23707 23493 23699 22807 23882 22779 23631 22775 23722 22820 23361 23062 23629 22935 23277 23098 23261 23340 23808 23261 23153 23468 23124 23301 22917 23747 23896 23348 23703 23666 23388 23549 24196 23285 23600 23420 23913 23112 23825 23750 23512 23481 23854 23245 23165 24336 23961 22760 23310 24107 23208 22983 24825 23479 23177 23236 24367 22501 23552 3659 14394 15944 17517 17424 16698 18220 19052 17339 17737 31904 27068 25536 25601 25126 24257 24476 24413 24082 24033 24474 23829 23939 23954 24003 23514 24222 23894 23644 23561 24088 23318 23904 23952 23623 23921 23981 23610 23584 23792 23977 23219 23733 23698 23665 23336 24218 23528 23773 23379 24145 23154 24248 23588 23630 23290 24106 23177 23905 23809 23703 23500 23916 23450 23587 23575 24210 23162 23762 23667 23638 23417 24256 23235 23355 23453 23758 23061 24239 23513 23619 23383 24023 23041 24194 23448 23701 23396 23985 23083 23887 23821 23524 23255 24094 23109 23730 23808 23682 23436 23737 23556 23432 23853 24056 23042 23552 23904 23132 23882 24579 22739 22573 24032 23574 22684 24496 23812 23095 23147 24387 22355 24438 23797 23095 23172 24258 22711 23216 24489 23220 23104 23758 23573 23030 23791 23571 23427 23257 23829 23068 23580 23836 23329 22973 23712 23321 23582 23797 23465 22956 23824 23045 23697 23786 23303 23303 23837 23248 23589 23684 23527 23395 23676 23348 23399 23659 23476 22863 23794 23146 23654 23664 23420 23121 23939 22991 23734 23563 23433 23169 23843 22935 24076 23015 23542 23457 23424 23292 23943 22857 23563 14955 17435 18493 19255 18817 19511 19217 19637 19729 19784 26720 25920 24273 25116 23825 24279 23916 23872 23971 24154 23409 24171 23210 24130 23717 23849 23495 23655 23318 24072 23104 23611 23552 23523 23757 23357 23255 23676 23049 24517 22607 23408 23744 22712 24435 23092 22956 24166 22397 24807 22734 23148 24036 22468 24299 23328 23028 24176 22317 24535 23094 23095 23927 22608 23880 23586 23491 24002 23106 23575 23379 23174 23805 22988 23815 23353 23325 23521 23117 23595 23342 23095 23728 23069 23918 22859 23488 23415 23280 23643 23120 23113 23669 22940 23977 22960 23459 23415 23332 23497 23371 23143 23522 23052 23959 22960 23594 23176 23687 23528 23579 23144 23364 23360 23521 23149 23891 22905 24002 22887 23509 23365 23491 23507 23435 23321 23464 23273 23911 23031 23677 23080 23591 23543 23440 23098 23676 23244 23823 23104 23904 22905 23927 23223 23499 23360 23325 23475 23593 23384 23939 22893 23947 23187 23468 23564 23282 23650 23297 23063 23792 22999 24033 22969 23525 23120 23864 22787 23412 23619 23031 24267 23113 23399 23190 23417 24111 22833 24068 22256 24640 22572 23432 23026 23639 23816 23133 23960 22425 24465 22824 12076 17366 20463 19275 20401 19223 21368 19965 20468 20500 28214 25240 23986 24470 23774 24208 23603 23623 23736 23562 23978 23474 23840 23147 23962 23049 23610 23116 23773 23328 23408 23522 23296 23695 23320 23173 23557 23405 23424 23101 23732 23176 23961 23100 23867 22936 23922 23067 23482 23328 23675 23206 22858 23394 23303 23580 23293 23094 23572 23205 23760 23479 23830 22939 24008 22939 23811 22853 24080 22801 23537 23089 23653 23504 23444 23408 23276 23553 23400 23286 23274 23447 23281 22995 23764 22998 23850 23120 23818 22799 23886 22924 23373 23257 23415 23513 23430 23298 23434 23521 23477 23341 23183 23610 23207 23141 23458 23440 23191 23063 23656 22960 24153 22901 24221 22210 24652 22528 23439 23031 23555 23385 22922 23993 22424 24100 23338 24003 22374 24432 22703 23184 22945 23693 23310 22796 23755 23256 23450 23126 23416 23277 23671 23168 23470 23043 23664 23061 23258 23362 23385 23575 23069 23708 23035 23714 23289 23696 22935 23788 22800 23513 22994 23751 22887 23415 23224 23479 23405 23599 23397 23302 23479 23382 23083 23264 23410 23176 23060 23309 23319 23347 22934 23465 23361 23448 22997 23747 23005 23851 23127 23774 18704 21303 20759 21655 20827 22114 21031 21729 21051 30803 24432 24430 23306 24229 23048 23703 23231 23824 23261 23464 23301 23757 23104 23449 23284 23472 23509 23344 23459 23280 23617 23377 23271 23188 23581 23204 23265 23114 23662 23048 23702 22708 24039 23090 23862 22579 24209 23143 23946 22521 24245 23143 23994 22520 23453 23052 23835 23202 23493 23510 23795 22778 23906 23226 23955 22609 23957 22995 23713 22913 23607 23056 23465 23137 23511 23063 23492 23196 23543 23040 23567 23067 23686 22411 23645 22959 23668 23077 23622 23173 23433 22931 23466 23252 23360 23061 23112 23427 23287 23344 23193 23381 23341 23308 23351 23392 23115 23255 23304 23200 23392 23258 23666 22764 23357 22775 23818 22743 23681 22695 23883 22928 23710 22935 23686 22945 23600 23191 23306 23112 23223 23399 23362 23232 23292 23405 23314 23134 23479 23106 23369 23129 23684 22865 23435 22704 23846 22924 23669 23131 23368 22916 23460 23314 23303 23002 23261 23552 23466 23292 23233 23297 23128 23078 23796 22581 23249 22327 24339 22539 23890 22120 24523 22748 24137 22546 23894 22791 23705 23462 23158 22901 22584 24372 22648 23772 22381 24176 23223 23715 22949 19731 21520 22287 22223 22131 22388 22144 22705 22361 22639 24525 23787 23488 23322 23659 23036 23373 22880 23784 22824 23653 22992 23576 22810 23516 22937 23464 22868 23508 23149 23398 22977 23279 23383 23320 23271 23184 23463 23281 23260 23360 23154 23339 23060 23569 22994 23421 22800 23763 22760 23514 22721 23811 22743 23663 22653 23987 22909 23632 22676 23808 22944 23620 23148 23530 22901 23431 23264 23272 22953 23262 23320 23330 23172 23206 23396 23306 23280 23306 22840 23328 22896 23784 22708 23337 22841 23738 22807 23510 22769 23764 23018 23628 22858 23612 22894 23518 23224 23330 22878 23440 23200 23348 22865 23400 23148 23661 22919 23405 23339 23238 22792 23182 23552 23027 22749 23225 23468 23328 22723 23564 23598 23219 22745 23863 22831 24049 22925 24119 22145 24236 22945 23168 23066 23416 23063 23004 23244 23306 23507 22439 23522 22863 23718 22893 23156 23311 23181 23457 23120 23298 23063 23436 23241 23001 23645 22736 23767 22757 23313 23002 23325 23157 22755 23192 23089 23384 23283 22894 23680 22712 23749 22921 23904 23240 23219 23412 23168 22887 23691 22678 23844 22770 23369 23224 23136 23368 23158 22868 23740 22611 23787 22805 23283 23175 23093 23366 23216 22884 23718 22784 23853 22653 23315 23001 23304 23406 23230 22818 23508 22905 23780 22818 23296 23129 23267 23420 23125 22891 23651 22775 23892 22708 23202 23269 23100 23502 23318 22946 23719 22447 24428 22442 23018 23594 22420 24313 22608 22745 23961 22103 24458 22538 23287 23131 22744 24303 22766 22754 23963 22109 24216 22952 22935 23882 22252 23965 23541 23142 23290 22956 23379 23252 22983 23549 22786 23586 22919 23105 23336 23011 23520 23045 22973 23380 23018 23702 22875 23352 23094 23296 23407 23024 22855 23437 22756 23765 22730 23274 23099 23207 23400 23098 22836 23605 22656 23789 22673 23281 23088 23225 23317 23200 22896 23685 22657 23756 22973 23425 23191 23229 23239 23520 23090 23545 22839 23684 23015 23578 23170 23129 23197 23626 22831 23415 23076 23248 23319 23168 22868 23668 22613 23744 22913 23649 23232 23168 23175 23755 22725 23296 23050 23280 23473 23063 22856 23579 22647 23649 23024 23327 23196 23392 23036 23718 22510 23214 23216 22879 24079 22768 22698 24035 22080 23794 23765 22800 23014 23664 22202 24327 22641 23385 23870 22235 24020 23253 22775 23680 22852 22843 24220 22709 22726 23997 22429 23136 23722 22813 23143 23332 22931 23475 23496 22912 23292 23079 23061 23547 23060 22915 23424 23029 23400 23423 23097 22885 23692 22734 23449 9977 14032 15641 16921 16624 17319 17638 17473 17458 18260 29184 26771 25927 25200 24367 24860 24175 24154 24092 24148 23433 23983 23695 23640 23731 24183 23127 15328 17877 18759 18464 19728 19419 19495 19335 19897 19389 27476 25725 25276 24243 24441 24160 24094 23585 24431 23814 23745 23148 23958 23681 23619 23404 24363 17324 19538 19645 20720 19910 20707 20884 20910 20276 31584 25975 25184 23989 24595 24188 23930 23424 23951 23788 23642 23347 24192 23735 23393 23456 23799 23744 19681 20518 22372 22086 20901 21303 21801 22241 21142 26519 25784 24887 23464 23220 24012 24263 22980 22952 24519 24340 23058 23062 23492 24243 22814 23392 20961 22055 21536 22280 22499 22783 22091 22596 22854 22975 24355 23831 23655 23871 23424 23513 23845 23554 23258 23463 23512 23648 22947 23640 23799 23667 23031 23424 23458 23568 22935 23681 23640 23699 22984 23516 23283 23818 22938 23615 23626 23656 22935 23344 23150 23858 23162 23354 23245 24016 23451 23389 23169 23621 23361 23407 22970 23768 23612 23621 22848 23264 23045 23849 23318 23338 23225 24103 23299 23346 23191 23535 23319 23767 22948 23407 23198 24029 23225 23259 23076 23512 23342 23810 22935 23273 23189 23936 23283 23340 22941 23427 23454 23654 22916 23464 23356 23983 23288 23279 23303 23385 23410 23474 22775 23557 23549 23843 22748 23232 23060 23718 23504 23319 22436 22986 23607 24422 24173 22828 22902 23050 23627 24070 22768 22379 22830 24312 24327 23563 22504 23044 23411 24128 22696 22484 23144 24303 24213 23369 22454 23165 22868 23851 23761 22758 22994 23221 23790 23387 23104 23185 23207 23304 23609 23241 23093 23009 23538 23652 23511 22855 23223 23092 23361 23378 23241 22775 23427 23419 23751 22967 23216 23092 23368 23367 23488 22713 23432 23425 23702 22848 23236 23012 23495 23240 23382 22652 23360 23391 23817 23027 23188 22607 23481 23153 23755 22895 23225 23143 23900 23223 23205 22925 23290 22973 23648 23172 23301 22660 23407 23356 23767 22784 23332 22816 23568 23252 23264 22679 23441 23275 23909 23060 23130 22834 23268 23204 23680 22880 23207 23095 23923 23011 23222 22806 23392 23040 23694 22855 23165 22978 23739 23437 23159 22877 23283 23071 23673 23031 23055 22834 23687 23493 23484 22775 23304 23069 23650 23091 23061 23137 23770 23251 23145 22903 23245 22959 23639 23200 23287 22593 23130 23554 24246 23202 22616 22640 23479 23768 23051 22165 23146 24119 24204 22684 22831 22679 23342 23793 22960 22088 22941 24150 24303 23107 22581 22784 23048 23412 23991 23005 22207 22786 24121 24294 22915 22592 22343 23043 23961 23332 22375 22392 23396 23808 23272 23043 23003 23193 23350 23505 22846 23029 23309 23701 23473 22962 23045 23104 23029 23392 22858 23200 23303 23635 23275 23020 23069 23137 23117 23592 23090 23027 23116 23701 23375 23093 22896 23183 22956 23633 22982 23030 22877 23609 23433 23133 22893 23234 23082 23680 22965 23107 22994 23771 23354 23287 22698 23239 23024 23595 22872 23257 23134 23845 22934 23213 22992 23309 23194 23572 22747 23168 23058 23726 23104 23074 22882 23201 23101 23580 22763 23144 23005 23873 23199 23173 23380 13721 15400 16903 16664 17128 17092 18152 17974 18279 33519 27661 25982 25488 24362 24770 15898 18806 18592 19420 19241 20104 19620 19749 19663 20631 27333 25715 24203 24983 24463 15539 19128 20706 20744 21325 20489 20935 20650 21390 21007 26985 25261 25240 24599 24311 24042 20542 21253 21678 21141 22047 21995 22129 21410 21863 27603 25191 24001 24633 24232 24073 21270 22462 22528 22980 22054 22842 22974 23017 21872 22789 24176 24493 23650 23429 24267 24635 22976 23485 23183 24118 23988 23036 22461 24087 24613 23725 22784 23250 23874 24008 22409 23600 24536 24028 22651 23218 23412 24370 23053 22601 23743 24685 23337 22925 22951 23847 23248 22556 23428 24629 23365 22848 22936 23800 23819 22541 22881 24465 23594 22839 22958 23819 23793 22536 23339 23568 23848 23090 23256 23180 23570 23346 23082 23232 23809 23638 23101 23187 23200 23522 23495 22995 23308 23613 23680 22932 23363 23179 23696 23032 23250 23425 23820 23148 23241 23036 23494 23428 23309 22880 23680 23556 23622 22893 23322 23360 23586 22898 23447 23539 23767 23031 23353 22962 23601 23312 23173 22993 23872 23477 23277 22359 23580 23322 
22637 22169 23251 21948 22621 22491 22352 23015 22136 22869 21744 23465 21744 22634 21526 23470 21985 21949 22697 22160 23046 21773 23159 21610 23381 21633 23274 20904 24164 21253 23205 20864 24148 21142 22947 21133 23706 21422 22373 21596 23147 21933 22220 21934 22786 22495 21773 22797 22129 22944 21747 23012 21875 23303 21984 23031 21760 23186 21829 23040 21633 23522 21772 23074 21213 23594 21613 23053 21029 23491 21729 22487 22025 22931 22117 22387 22350 22673 22452 22384 22533 22231 22792 22217 22481 22151 22848 22199 22332 22471 22409 22689 22172 22788 22085 23005 22056 22730 21808 23013 21802 22607 21892 22781 22265 22304 22455 22391 22709 22273 22481 22109 22733 22033 22289 22216 22528 22455 22066 22695 22234 22771 22119 22855 21671 23086 21724 22720 21675 23035 21891 22533 22112 22883 22241 21921 22199 22636 22373 22422 22453 22185 22640 22199 22208 22144 22580 22304 22085 22516 22380 22432 21812 22616 22062 22786 22493 22881 21747 23156 21559 22831 21592 23223 21729 22560 22020 22859 22449 22656 22183 22308 22413 22389 21947 22592 22008 22892 21744 22863 21691 23108 21673 22666 21708 23098 7864 9788 10003 11851 11043 12889 13015 33191 31018 30167 28350 27534 26854 27011 25032 25635 24642 24916 23990 25105 23416 24174 23460 23978 22795 23988 23259 23206 22822 23759 22535 23255 23308 22904 22515 23206 22647 22729 22868 23412 21901 22901 22847 22827 22148 24245 22835 22350 23047 22931 21411 24229 23113 22000 22176 23816 21468 22659 24023 22432 22120 23217 22679 21400 23830 23100 21576 22336 23335 21651 22832 22999 22601 22564 22856 22522 22481 23008 22608 22247 22720 22553 22400 22711 22808 22153 22641 22635 22327 22726 22921 22093 22578 22593 22509 22144 23420 22378 22504 22259 22865 21768 23111 22589 22384 21954 23077 21694 22904 22592 22656 21945 22856 22244 22362 22449 23079 21693 22693 22346 22448 22456 23136 21605 22612 22218 22727 21799 23216 21987 22604 22105 22955 21686 23304 22425 22548 21907 23012 21687 22957 22598 22377 21959 22969 21877 22637 22675 22341 21998 22946 21700 22867 22520 22279 21943 22898 21942 22401 22731 22555 21974 22663 22208 22682 23328 21561 21884 23136 21021 22965 23293 21493 21714 23145 20853 23634 22248 22050 22396 21828 22588 23588 21025 22140 22761 21063 23335 22706 6127 9680 11175 11085 14208 13765 14662 15071 15142 32296 30988 28860 28130 26573 26386 25957 24801 24464 24848 23572 24653 23168 23840 23372 23235 23608 23131 22813 23601 22430 23593 22822 23001 22856 22688 22759 23317 22499 23297 22052 23203 22624 22816 22295 22955 22069 23453 21894 22941 22018 22830 22657 22469 22080 22996 21863 23412 21706 22770 22247 22593 22665 22480 22022 23088 21790 23225 21874 22625 22087 22726 22541 22534 21914 22853 21892 23360 21529 22576 22075 22612 22689 22395 22291 22433 22338 22947 21937 22793 21824 22800 22284 22551 22172 22631 22203 23013 21726 22693 21845 22993 21584 22209 22657 21555 23443 22089 21926 23412 21063 24080 21685 22158 22407 21931 23622 21755 22720 21753 22697 23026 21737 23403 20998 23847 21523 22156 22871 21365 23886 21812 21536 23108 22126 22716 22537 22792 22880 22017 23082 22080 22461 22615 22297 22821 22196 22401 22778 21961 23109 21964 22643 22370 22438 22730 22264 22265 22421 22389 23009 21830 22743 21601 23009 22093 22631 22263 22784 22596 22670 22289 22477 22378 22755 21880 23040 21616 23321 21850 22708 21803 22977 22263 22732 22284 22243 22458 22368 22044 22567 22310 9321 11002 13120 14144 15164 15552 16566 16537 17632 17608 31063 27893 28264 25554 26004 24619 25197 24008 24427 23687 23540 23668 23309 22965 23114 23149 23179 22471 23451 22295 23529 22233 23175 22130 23360 22487 22178 22697 22973 22573 22775 22583 22243 23520 21757 22238 22666 22436 23425 21867 23388 21479 23996 21506 22997 21324 23576 22103 22433 23018 21683 23648 21879 22981 21235 23883 21593 22353 21732 23116 22407 21975 22785 22149 22873 22292 22245 22289 22706 22224 22288 22384 22389 22791 22456 22859 21898 23073 21876 22640 22122 22736 22653 22744 22647 22166 22649 22377 22415 22336 22682 22308 22103 22592 22389 22585 21924 22884 21941 23016 21905 22921 21556 23253 21607 22810 21859 23072 22143 22552 22464 22479 22641 22387 22069 22224 22556 22278 21909 22512 22224 22916 22158 22957 21833 23232 21847 22937 21712 23463 21819 22977 21625 23225 21556 22640 21814 23052 22091 21961 22413 22272 22656 22215 22405 22245 22658 22325 22154 22456 22423 22499 22000 22752 22049 22989 21989 23045 21582 23384 21361 22912 21205 23768 21234 22240 21535 23652 21523 22122 22016 22433 22839 21917 22360 22172 23196 21943 22954 21367 23670 21453 14854 14592 18199 16529 18282 17191 19451 18862 19387 27748 27553 25691 25229 24481 24412 23940 24044 23591 23276 23354 23525 23034 22986 23059 22950 22805 22375 23152 22510 22716 22560 22883 22487 22166 22633 22689 22642 22348 22450 22686 22490 22183 22457 22579 22409 22272 22519 22593 22411 22287 22438 22759 22247 22344 22402 22658 22620 22360 22666 22585 22573 22256 22226 22550 22404 22259 22277 22756 22539 22219 22559 22574 22692 22372 22455 22475 22661 22215 22407 22576 22517 22480 22319 22664 22416 22387 22193 22656 22490 22480 22355 22543 22417 22311 22721 21893 22529 21602 23249 21473 22880 21194 23792 21417 23191 20969 23991 21485 23269 21126 23605 21715 22777 22356 22077 21886 21548 23564 21314 22472 21093 23803 21690 22963 21560 23024 22081 22752 22339 22237 22060 22263 22557 22151 22429 22051 22788 22276 22487 22264 22720 22860 22420 22556 22007 22641 21800 23176 22032 22777 21888 22711 22193 22739 22043 22640 22055 22393 22633 22408 22344 22291 22555 22695 22214 22588 22064 22561 22031 22860 21632 22564 21745 23110 21568 22871 21721 23124 21847 22888 21847 22855 21744 22498 22252 22284 22012 22148 22539 22353 22249 17894 18870 19737 19712 20881 19681 21020 19841 21621 20293 25793 23611 24460 22445 23715 22761 23198 22516 22868 22819 22533 22763 22471 22865 22592 22600 22519 22668 22762 22332 22596 22192 22621 21815 23523 21237 22953 21215 23936 21521 23406 21206 23495 21733 23142 22139 22400 21845 22244 23048 21578 22065 21728 23389 21600 22425 21126 23742 21554 22894 21120 23569 22032 22791 21975 22560 22076 22663 22173 22513 22253 22218 22695 22151 22344 21978 22876 22237 22615 22565 22264 22329 22231 22894 22107 22540 22043 23137 21904 22713 21749 23207 21879 22964 21719 22968 21815 22851 22010 23077 22047 22875 21768 23173 22079 23015 21652 23276 21790 22967 21748 23057 21756 23007 21910 23073 21576 22927 21696 23237 21905 23065 21647 23272 21808 23021 21626 23192 21606 22634 21690 22900 21828 22667 21815 22877 21901 21975 22193 22375 22576 22288 22068 22420 22055 23015 21961 22763 21709 23106 21718 22484 22265 22571 22397 22427 22242 22293 22451 22618 21547 22869 21737 23157 21295 22439 22000 22423 23232 21474 22018 22296 21591 23764 21397 22826 21495 22814 22791 21852 22479 21827 22285 23287 21377 22656 21420 22855 22935 21741 22563 21713 22441 23338 21741 22315 22368 22166 23000 21959 22685 21967 22736 22463 22231 22527 21998 22533 22572 22196 22810 21913 22857 22185 22305 22389 22116 22453 22799 21956 22798 21725 22730 22482 22256 21997 22656 21859 23174 21633 22657 21925 22625 22441 22455 21937 22546 21976 23176 21651 22611 21646 22952 22107 22353 22103 22533 21789 23181 21576 22780 22016 22476 22566 22462 21784 22952 21717 23101 21732 22657 22091 22604 22491 22209 21894 22688 22081 23141 21837 22694 21940 22721 22484 22548 22308 22118 22532 22560 21561 22805 21792 22874 22185 22477 22165 22350 22344 22776 21722 22801 21595 23108 22439 21828 22419 21731 22388 23411 21673 23056 21380 22540 23209 21635 22218 22165 21670 23818 21046 22428 22314 21848 23705 21510 21696 22827 21335 23808 21109 21965 22660 21712 23025 22135 22368 22294 22358 22351 22739 22090 22405 22227 22176 22759 22016 21958 22812 21764 22869 22459 22204 22427 22185 22328 22944 21792 22684 22201 22413 22615 22323 21888 22809 21593 22848 22293 22567 22135 22518 21984 23180 21523 22539 22135 22257 22393 22800 21767 22645 21991 22482 22521 22265 21796 22789 21547 23169 21707 22585 22123 22572 21863 23279 21716 22502 22337 22227 22400 23098 21713 22728 22160 22410 22447 22721 21625 22823 21865 22484 22644 22535 21213 22811 21575 23012 22389 22240 21981 22797 2223 6317 8673 9977 10749 12593 11893 13673 13964 13976 33523 32350 29501 29468 29024 26496 25744 26226 24761 24176 25777 24631 23324 24279 23945 22424 24124 9885 9824 12235 13971 14919 14053 17010 17446 15669 33432 32631 30594 27898 28903 27418 24945 24993 25327 24624 24227 24250 24693 23817 23543 23453 23941 23286 11727 13957 15155 15475 16745 17373 17879 17643 18892 31924 29837 28274 27458 26525 25559 24871 25436 24525 24151 23687 24393 23712 23564 23365 24168 23112 14525 15199 17519 17589 18297 18693 20160 19335 19972 19520 29046 27163 26169 25408 25851 24348 24116 23523 24343 23501 23479 22987 24272 23256 23329 22713 23837 18347 19298 19955 21268 20164 21059 20641 21824 20903 21484 25245 25729 24028 23894 23483 24238 22999 23381 23348 23855 22519 23190 22535 23560 22505 22796 23053 23664 22177 23096 22374 23449 22276 22730 22897 23573 22374 22737 22379 23228 22133 22208 23310 24187 22509 21781 21875 22825 23222 22201 21179 22946 23933 22232 21723 22693 22705 23259 21506 21789 23272 24262 22720 21770 21782 22881 23267 21911 21252 22869 23917 23543 21616 22255 22518 22489 22942 22432 22242 22541 23096 22737 22316 22105 22756 22354 22921 22350 22199 22447 23296 22519 22318 22296 22739 22465 22933 22089 22249 22490 23115 22633 22385 21753 22702 22561 22837 21893 22509 22585 23255 22107 22359 21956 22660 22152 22968 22151 22455 21957 23281 22400 22667 21663 22717 22016 22823 22318 22377 21694 22857 22571 22888 21549 22647 21883 22989 22199 22423 21589 22804 22441 23145 21817 22310 22160 22628 22396 22503 21422 22716 22292 23259 21927 22424 21991 22740 22118 22992 21821 22336 22102 23104 22576 22784 21898 22520 22155 22905 22039 22295 21834 23040 22603 22555 21725 22432 22016 22774 22229 22253 21932 22988 22697 22644 21421 22423 22072 23105 22247 21505 21641 23302 23466 22986 21356 21737 21657 22859 22762 21765 20966 22616 23500 23913 22268 21567 21365 22101 22171 23273 22021 20987 22069 23714 23099 21718 21420 21942 22381 23235 22114 21101 21431 22550 23271 22663 22149 21778 22596 22145 22867 21925 22179 22293 22851 22775 22332 21884 21830 22294 22688 22419 22300 22245 22888 22682 22473 21698 22545 22027 22794 22296 22387 21787 22651 22612 22664 21675 22258 21927 22747 21923 22196 21851 23000 22598 22744 21803 22387 22238 22464 22227 22727 21862 22136 21952 23142 22261 22256 21900 22551 22227 22868 21563 22563 22310 23216 22087 22186 21927 22513 22272 22833 21687 22251 22124 23209 22474 22837 21449 22675 21959 22925 22232 22432 21820 23090 22469 23019 21594 22347 21779 22805 22217 22558 21650 22421 22663 22854 21687 22592 21869 22802 22208 22643 21509 22544 22382 23146 22282 22464 21888 22757 22299 22400 21637 22788 22385 23057 22181 22053 22013 22448 22394 22618 21583 22377 22567 23080 22192 22230 22037 22545 22322 22928 21500 22629 22464 23073 21934 22283 21910 22540 22316 22624 21688 22225 22805 23614 21448 21546 21730 22917 22572 21301 21424 23289 23748 22807 21149 21869 21757 22791 22711 21576 20992 22759 23524 23447 21360 21634 21682 22713 22839 21726 20892 22658 23576 5485 7108 8677 10370 11897 13161 13952 12472 13707 35578 33953 29802 29265 28224 27614 11553 12689 14708 15870 16724 16204 17159 17135 18242 33763 32375 30960 29893 28198 26903 14534 15989 17131 17949 17873 18851 19426 19796 19181 19624 30709 29643 27630 27152 26805 18300 17653 18360 19123 19808 20077 20298 19923 21390 20973 29265 27754 27305 26278 25480 24855 21413 21178 21406 21221 21851 21775 22072 21172 22265 26680 26396 24565 25065 24327 24646 23394 24056 23817 24612 23086 23547 22991 23754 23311 23537 22363 23928 23255 23415 22457 23298 22992 23344 22258 23488 23137 23471 22268 23001 22491 23499 22445 22771 22634 23741 22557 23133 22170 23480 22310 22752 22385 23488 22279 22791 22077 23120 22489 22461 22662 23481 22159 22713 22041 23174 22528 22477 22138 23232 22767 22829 22026 22955 22397 23182 21575 22915 22503 23354 21864 22731 22104 23164 22221 22461 22183 23409 22251 22573 22052 22941 22397 22440 22089 23143 22757 22796 21812 22883 22253 23031 22155 22313 22311 23365 21869 22512 22081 22891 22321 22400 22066 23197 22661 22375 22049 22614 22311 22838 21748 22807 22710 22717 21848 
