# Supplementary material for: An Active Feature Selection Strategy for DWT in Artificial Taste
Source: Hindawi journal article supplement (doi:10.1155/2018/9709505), 2018-01-01
Supplement: f1 [file 9709505.f1.zip › beer-med-1.txt]

43312 43496 43527 43496 100 6233 14179 16800 19108 19347 20519 20160 21041 20778 21296 21387 21693 21485 21583 21595 21798 21387 21666 21163 21693 21229 21857 21556 21757 21483 21857 21875 21700 21713 21614 21549 21760 21507 21703 21634 21738 21710 21829 21657 21896 21528 22105 21165 22059 22154 21975 21809 21852 21478 21657 21717 21856 21544 21668 21762 21912 21892 21781 21962 21696 21844 21782 22004 21822 22066 21682 22032 22000 22122 21876 21812 21516 22064 21417 22272 21411 22164 21402 22144 21461 22125 21669 22017 21760 21828 21864 21789 21828 21810 21784 21767 21774 22000 21738 21911 21672 21927 21590 21853 21684 22076 21627 22056 21762 22087 21714 22097 21345 22151 21508 22123 21448 22104 21481 22177 21433 22176 21559 22070 21566 22180 21538 22052 21688 21732 21614 22075 21593 22073 21677 21968 21594 22028 21617 22032 21607 22063 21592 22108 21561 22150 21623 22112 21687 22108 21478 22148 21504 22200 21508 22188 21511 22243 21556 22123 21625 21680 21538 22120 21608 22001 21540 22022 21808 22083 21527 22230 21843 22116 21489 21974 21525 22125 21622 22157 21348 22174 21479 22001 11215 17029 17952 19031 19175 19464 18988 19920 19644 20410 26757 24078 23582 22493 22321 22454 21765 22436 21824 22439 21605 22061 21837 22296 21564 22345 21392 21888 21486 22042 21862 21948 21624 21853 21813 22263 21581 22337 21522 21998 21680 22071 21677 22008 21671 21839 21712 21959 21842 21688 21768 21702 21981 21712 21760 21680 22034 21723 21972 21735 21805 22105 21864 22227 21833 21911 21833 21894 21914 21888 21950 21783 21881 21728 21993 22013 22005 21924 22008 21724 21867 21768 22110 21700 21658 21817 22007 21912 21889 22136 21930 20929 22133 21686 22125 21840 22279 21568 22039 21413 22128 21768 22064 21748 22087 21947 21804 21874 22093 21777 21821 21800 22186 21606 21984 21848 21941 21616 22080 21785 22039 21537 22167 21852 22128 21571 22128 21917 22029 21626 22076 21784 22046 21661 22062 21760 22265 21554 22132 21607 22020 21658 22152 21637 21988 21786 22182 21455 22080 21655 22145 21520 22144 21719 22136 21521 22232 21601 22104 21559 22250 21405 22217 21691 21938 21651 22192 21376 22062 21722 22124 21594 22201 21661 22025 21781 22151 21512 22169 21609 22078 21645 22274 21460 22208 21495 22044 21589 22126 21531 22159 21749 18304 19609 20629 20362 21111 21014 21255 21049 21147 28036 24373 22712 22649 22184 22454 21612 22544 21734 22108 21924 22410 21592 22224 21732 22204 21716 22280 21650 22160 21488 22232 21719 21916 21611 22082 21792 21952 21478 22413 21570 22184 21747 21950 21799 22112 21984 22075 21533 21986 21632 22037 21853 21654 21543 22058 21885 21984 21947 22107 21849 22016 21954 21827 21738 21933 22101 22035 21549 21895 21784 21848 21832 21870 21988 22059 21780 21878 21652 21959 22209 21925 21812 21842 21752 22090 21959 22083 21760 21667 21536 22177 21949 21791 21791 21930 21751 21928 21933 21911 21814 21742 21923 21867 22016 22210 21999 21491 21671 21109 22125 21805 22154 21793 21980 21469 22031 21710 22188 21753 21992 21779 21873 21631 21824 21962 22008 21884 22025 21772 21954 21607 21981 21689 22161 21863 22055 21669 22008 21580 22188 21671 22226 21901 22160 21680 21964 21484 22000 21650 22215 21721 22160 21724 22228 21432 22096 21547 22144 21712 22237 21792 22172 21737 22053 21517 22145 21676 22160 21668 22230 21600 22076 21496 22084 21614 22246 21674 22272 21667 22169 21498 22048 21494 22162 21686 22220 21720 22203 21738 22112 21540 18080 20039 21217 20918 21696 21105 21721 21325 21753 21213 24396 22677 22664 21958 22326 21832 22333 21692 22151 21712 22169 21687 22248 21654 22083 21532 21981 21609 22158 21640 22119 21554 22288 21557 22080 21654 21954 21863 22144 21672 22124 21600 22133 21705 22128 21393 21465 22172 22184 21744 22080 21644 22016 21511 22024 21468 22012 21601 22177 21709 22041 21700 21994 21634 21804 21447 22023 21693 22154 21629 21930 21665 21924 22245 21872 21430 22073 21944 22092 21815 21831 21795 21924 22359 21877 21636 21827 21902 22031 21904 21845 21820 21955 21818 21925 21669 21712 21687 21913 22066 22241 22004 21901 21728 21696 21722 21845 21864 22050 22103 22073 21889 21853 21952 21572 21712 22075 22249 21697 22086 21619 22182 21783 22293 21671 22037 21652 21992 21783 22003 21842 22085 21957 22100 21796 21977 21544 21896 21541 21990 21769 22136 21765 22193 21795 22183 21639 22124 21671 21942 21641 22026 21679 22059 21804 22221 21699 22256 21699 22076 21824 22084 21568 22104 21686 22121 21743 22238 21735 22196 21629 22220 21653 22026 21538 22189 21655 22204 21696 22295 21692 22206 21652 22090 21465 22103 21606 22231 21696 22236 21690 22295 20474 21479 21580 21585 21294 21797 21452 21965 21516 24643 22424 22632 21853 22536 21730 22168 21733 22201 21704 22227 21678 22159 21679 22212 21544 22161 21593 22048 21511 21955 21641 22103 21605 22092 21623 22222 21636 22244 21688 22118 21456 22144 21593 22032 21588 22053 21658 22017 21546 22103 21496 21856 21536 22087 21696 22357 21840 22369 21721 22118 21344 21943 21513 21944 21497 21939 21518 21990 21559 21968 21632 22087 21752 22119 21693 22126 21748 22128 21755 22112 21745 22041 21729 22036 21756 22080 21824 22219 21877 22019 21781 22121 21984 22061 22039 22105 22066 22049 22004 22093 22058 22050 21793 22006 21678 21789 21977 21513 21750 21917 21616 21932 21768 21776 21980 21981 22042 22133 21852 21878 21761 21827 22075 21796 21922 21969 22164 21084 21995 21772 21980 21740 21928 21648 22151 21571 22228 21767 22041 21905 21980 21796 22029 21635 22064 21828 22056 21939 22008 21678 22034 21638 22056 21863 22141 21690 22144 21607 21965 21696 22139 21856 22172 21613 22053 21692 22204 21813 22152 21552 22202 21772 22233 21538 22001 21652 22187 21740 22084 21632 22186 21740 22181 21579 22132 21749 22160 21573 22056 21600 22272 20677 21723 21367 22144 21523 22039 21383 22100 21640 21970 21687 22432 21803 22157 21428 22204 21773 22091 21489 22319 21701 22214 21642 22334 21628 22097 21632 22133 21697 22141 21534 22107 21638 22080 21670 22118 21765 21965 21589 22051 21672 22065 21650 22172 21582 21932 21536 22128 21690 22049 21749 22065 21628 22348 21412 22173 21670 22034 21864 22187 21575 22154 21271 22131 21856 22042 21440 22000 21667 22114 21572 22002 21776 21929 21914 22000 21738 21972 21425 22004 21587 21788 21666 21984 21842 21952 21748 22095 21754 21850 21784 22012 21966 21833 21952 22029 21879 21936 21652 22080 21889 21813 21860 22066 21642 21947 22097 21961 21829 21732 21994 21756 21900 22075 21793 21792 21746 22076 21808 21973 21996 21927 21816 21840 22180 21905 21736 22051 21726 21780 21716 21826 21633 21701 22165 21718 22233 21841 22069 21568 22087 21685 22010 21728 22173 21892 21912 22016 22077 21799 22003 21893 21921 21789 22042 21800 21960 21709 22161 21622 21786 21809 22132 21536 22096 21825 21968 21748 22120 21618 22064 21815 22133 21527 22259 21699 22016 21678 22184 21640 22086 21758 22123 21641 22184 21680 22070 21664 22193 21476 22233 21661 22178 21611 22248 21504 22344 21677 22196 21534 22205 21734 22050 21683 22212 21641 21949 21761 22135 21582 22273 21748 22057 21599 22202 21564 22230 21543 22176 21421 22172 21718 22016 21554 22169 21607 22154 21700 22031 21593 22087 21588 21671 21578 22156 21399 22208 21657 22086 21713 22231 21750 22178 21984 22235 21973 22160 22074 22016 22080 22053 21996 21625 22020 21625 21785 21620 21454 21703 21412 21814 21554 21892 21543 21914 21593 22011 21713 22000 21683 22086 21697 21996 21801 22090 21767 22180 21623 22040 21857 21923 21736 22050 21824 21701 21659 22095 21692 21697 22052 21968 21645 22001 21865 21816 21786 22085 21687 21792 21963 21824 21768 21925 21943 21628 21986 22144 21580 21882 22113 21797 21760 21943 21989 21882 21911 22048 21568 21984 21909 21421 22718 22085 21896 21767 22016 21609 22080 21574 22112 21599 22086 21888 22261 21678 21961 22025 21892 21591 21965 21824 21910 21856 22197 21661 22135 21749 22114 21693 22202 21841 22026 21805 22101 21626 22077 21770 22038 21577 22137 21704 22108 21648 22215 21559 21981 21754 22176 21557 22157 21733 22040 21694 22179 21600 22236 21715 22240 21511 22153 21637 22190 21579 22312 21550 22361 21726 22137 21540 22225 21712 21981 21748 22199 21632 22224 21685 22075 21748 22244 21542 22224 21569 22107 21544 22191 21640 22080 21741 22278 15666 18935 19110 20141 20003 20668 20366 20961 20484 36373 25392 23917 22447 22861 22608 22553 21850 22230 21722 22528 21770 22209 21696 22128 21753 22016 22132 18526 20290 20417 20690 21576 20778 21235 21076 21792 28776 24208 22892 22745 22244 22296 22015 22621 21944 22483 21910 22231 21800 22147 21752 21984 21972 12134 19672 21101 21051 21519 21079 21854 21280 21888 21628 25216 23314 22472 22461 22453 21819 22167 21721 22276 21754 21952 22140 21850 22242 21916 21884 22059 18297 21100 21280 21538 21459 21527 21685 21709 21463 21566 24076 22640 22447 21934 22245 21744 22288 21687 22146 21792 22279 21874 21967 22017 22169 21820 22081 20857 21584 21412 21877 21575 21857 21716 21828 21653 22036 22255 22412 21761 22357 21806 22215 21858 22057 21847 22229 21810 22268 21661 22235 21725 22210 21680 22115 21742 22198 21720 22205 21689 22276 21543 22278 21664 22246 21610 22187 21701 22088 21707 22236 21728 22192 21671 22231 21556 22232 21689 22136 21741 22116 21688 21696 21669 22206 21551 22368 21683 22248 21552 22118 21614 21976 21680 22094 21688 22151 21613 22208 21576 22147 21648 22060 21611 22024 21333 21915 21667 22341 21592 21985 21743 22004 21617 22192 21457 22344 21492 21975 22163 22068 21868 21543 21514 22193 21902 22168 21593 21909 21799 22112 21804 22096 21767 21908 21769 22084 21751 22028 21690 22200 21688 21850 21716 22016 21805 22107 21897 21945 21589 21954 21216 21964 22000 21937 21824 21959 21737 21985 21926 21881 21657 22193 21569 21881 22034 21899 21927 22088 21680 22346 22081 22095 21784 21947 21854 21764 21686 21967 21838 22016 21840 21897 21769 20781 22182 21916 22045 21603 22108 21552 22039 21687 21990 21716 22085 21840 22033 21790 22176 21857 22052 21792 22100 21591 22016 21787 22282 21510 22153 21632 22125 21749 22244 21577 22069 21824 21965 21682 22197 21660 22001 21837 22177 21597 22097 21745 22220 21594 22187 21741 22117 21575 22176 21743 21958 21625 22229 21661 22128 21572 22272 21660 22080 21636 22336 21615 22052 21742 22250 21448 22071 21744 22192 21543 22163 21706 22154 21582 22272 21698 22393 21644 22240 21632 22250 21610 22103 21607 21988 21701 22131 21575 22009 21747 22216 21844 22087 21643 22197 21504 22006 21545 22067 21687 22231 21680 22220 21266 22072 22157 22187 21326 21892 21862 22194 21685 22194 22209 22027 21930 22067 21780 21696 21568 21991 21537 22209 21712 22230 22003 22098 21568 21805 21645 22046 21803 21664 21582 22053 21960 22017 21927 21833 21540 22186 21673 21834 21707 22245 21696 21910 21875 22234 21888 21739 21798 22065 21709 21984 21671 22060 21984 21973 21645 21843 22072 21800 21678 21763 22040 22020 21735 21780 21824 21940 21719 21698 21924 22063 22011 21797 21788 21801 21928 22104 21972 21579 21941 21876 22171 21550 22112 21808 22204 21888 21840 21688 22161 21900 22020 21711 22144 22004 21871 21709 22089 21809 22085 21803 21994 21594 22315 21812 22140 21412 21991 21831 22190 21684 22085 21579 22167 21720 22164 21536 22119 21705 22204 21752 21980 21697 22186 21668 22048 21561 22144 21766 22172 21648 22112 21689 22247 21664 22108 8913 18323 19205 20492 20057 20952 20632 21280 20768 21280 27379 24588 23122 23086 22177 22498 18471 20828 20892 21702 20974 21761 21296 22007 21300 29248 23867 23425 22361 22616 22016 18822 20514 21522 21235 21884 21346 21490 21589 21730 21510 24101 22646 22739 21972 22543 17686 21537 21120 22016 21446 22102 21509 22097 21492 22052 23857 22379 22589 22401 21873 22136 21095 21816 21504 21546 21659 22016 21836 22141 21680 23465 22224 21984 21824 22260 22065 22321 21921 22204 21902 21836 22164 22213 21624 22232 21974 21962 21812 22087 21873 22136 21900 22172 21928 22168 21779 21998 21725 21941 22176 22032 22022 22032 21833 21849 21703 21810 21992 21716 21919 21865 21990 22083 22101 21957 21936 21861 21881 21973 21697 21857 21719 21967 21889 22086 22024 22135 21843 22044 21680 21857 21821 22085 22018 21773 22244 21628 22091 21790 22016 21460 22007 21727 22211 21852 22241 21858 22100 21536 21900 21626 21938 21944 22080 21987 22080 21882 22258 21762 22001 21687 21959 21609 22165 21808 22174 21757 22162 21809 22064 21738 22085 21559 22081 21828 22132 21774 22276 21641 22279 21728 22189 21482 22113 
21417 22136 21734 21879 21453 21685 21792 21800 21329 21936 21877 21764 21799 21991 21903 22168 21908 21743 21425 21895 21775 21722 21708 21837 21692 21736 21670 21520 21417 21595 21728 21843 22038 21763 21857 21523 21458 20814 20265 20841 20384 20882 20407 20997 20425 21015 20458 20981 20433 21069 20455 21088 20373 21161 20460 21232 20321 21274 20385 21280 20361 21294 20345 21380 20404 21349 20573 21161 20480 21186 20602 21222 20887 21380 20568 21027 20613 20992 20608 21084 20535 21109 20380 21280 21028 21209 20952 20983 20705 21277 21043 21336 20616 21186 20859 21256 21164 20755 20332 21265 21143 20960 20666 21223 20441 21431 20365 21522 20830 21272 20714 21306 21325 21260 20945 21403 21195 21362 20656 21360 20935 21255 20777 21304 20752 21223 20822 21369 21008 21413 21094 21208 20714 21430 21047 21270 21025 21334 20994 21319 21045 21105 21219 21340 21332 21228 21143 21062 21309 20704 21120 20981 21149 21200 21200 21098 20986 21275 20997 21233 21052 21395 20923 21475 20849 21208 21006 21079 20825 21158 20930 21256 20769 21367 21162 21152 21437 20759 21239 20841 21687 21175 21351 20819 61 1518 4477 5748 7597 8002 9167 9149 10165 10491 30316 26277 24846 23363 23015 22218 22359 21798 21952 21476 21717 21217 21531 21081 21533 21044 21628 20923 21543 21051 21425 21056 21571 20811 21570 20790 21600 20792 21593 20818 21564 20744 21579 20759 21600 20827 21543 20904 21576 20872 21527 20793 21570 20835 21671 20861 21614 20827 21640 20845 21557 20867 21543 20895 21552 20932 21513 20920 21596 21030 21494 21012 21509 20941 21663 20917 21639 20928 21669 20887 21768 20759 21504 20865 21516 20667 21572 20818 21365 20858 21536 21178 21438 20852 21493 21062 21604 20792 21554 20852 21553 21064 21585 20880 21790 20973 21752 21195 21580 20850 21424 20894 21477 20907 21016 21009 21888 21028 21415 20933 21439 21239 21576 20845 21082 20890 21719 20681 21699 20886 21638 20747 21681 21383 21579 21009 21532 20917 21488 20865 21689 21321 21407 21351 21696 21140 21348 21044 21613 21163 21340 21399 21118 20914 21377 21132 21365 21217 21385 21314 21252 21457 21298 20933 21595 21175 21185 21392 21497 21453 21715 21303 21431 21476 21644 21272 21385 21205 21238 21206 21389 21038 21461 21447 21367 21362 21381 21371 21579 21283 21224 56 9042 11799 12459 13973 14544 14714 14866 15420 15381 32885 26711 24835 23516 23195 22036 22474 22062 22123 21664 21844 21489 21583 21555 21557 21345 21623 21277 21554 20994 21653 21499 21435 21032 21703 21305 21546 21096 21748 21072 21472 21223 21701 21159 21552 21017 21735 21120 21703 20924 21844 21158 21760 20918 21681 21273 21768 20936 21671 21184 21861 21090 21568 21020 21863 21139 21649 21021 21821 21143 21829 20989 21703 21059 21886 21100 21550 20967 21762 21197 21805 21144 21545 21093 21652 21312 21797 21445 21637 21134 21877 21194 21806 21133 21660 21084 21907 21040 21920 21190 21690 21079 21860 21097 21637 21123 22219 21221 21723 21139 21573 21460 21752 20999 21808 21138 21840 20983 21904 20699 21615 20587 21981 21205 21975 21504 21642 20753 21904 21426 21413 21066 21696 21026 21716 21207 21473 20887 21861 20883 21613 21019 21167 21020 21646 21009 21765 21365 21321 21198 21760 21292 21645 21021 21605 21073 21797 21137 21632 21316 21620 21561 21249 21447 22001 21270 21560 21373 21393 21989 21621 21127 21875 21721 21676 21252 21506 21459 21196 21193 21489 21658 21851 21259 21363 21538 21453 21479 21460 21469 21856 21712 11751 15325 16668 17040 17344 17677 18189 18507 18658 18425 26839 24295 23040 22349 22388 22016 22119 21913 21424 22325 21570 21792 21302 21794 21206 21913 21415 21768 21621 21733 21569 21699 21456 21559 21259 21757 21399 21751 21580 21669 21549 21560 21195 21666 21240 21899 21312 21964 21389 21889 21063 21669 21132 21863 21271 21904 21318 21972 21404 21875 21272 21726 21159 21869 21271 21936 21338 22040 21223 21884 21197 21750 21131 21848 21279 21885 21283 22024 21273 21975 21113 21859 21005 21898 21218 21964 21337 21968 21336 21926 21275 21708 21194 21741 21229 21844 21372 21914 21387 22055 21327 21893 21280 21893 21176 21943 21245 21968 21163 21969 21297 21719 21200 21770 21176 21808 21458 21760 21232 21912 21194 21836 20802 21886 21136 21829 21213 21952 21559 21826 21225 21492 21218 21670 21305 21815 21112 21747 21289 21641 21312 21797 21259 20920 21176 21711 21427 21772 22075 21664 21283 21712 21679 21820 21260 21746 21016 21806 21120 21923 21415 21751 21696 21680 21367 21674 21261 21917 21196 21767 21370 21587 21280 21709 21678 21670 21639 21883 20937 21461 21527 21609 21540 22047 21833 21591 21584 21558 21226 21657 21406 10178 17494 18813 19516 20048 19907 20240 20113 20129 20272 26737 23271 22809 22113 22174 22196 21945 21910 21801 21549 21873 21396 21687 21575 21263 21426 21592 21626 21335 22092 21320 22215 21364 22121 21448 21826 21421 21641 21497 21730 21625 21732 21735 21792 21627 21798 21526 21774 21380 21686 21387 21872 21411 21910 21399 22042 21424 22112 21443 21949 21335 21815 21309 21815 21194 21813 21316 21806 21403 21878 21344 21978 21399 22004 21475 22008 21479 22043 21445 22060 21317 22035 21473 22058 21446 22070 21314 22088 21303 21986 21366 22037 21358 22074 21284 22087 21265 22090 21384 22057 21473 22006 21431 22005 21412 22006 21374 21963 21269 21926 21207 21901 21113 21953 21384 22043 21222 22223 21136 22104 21286 21998 21287 22003 21285 21809 21296 21753 21278 21851 21482 21892 21329 21943 21330 21938 21267 22000 21159 21938 21477 21773 21153 22033 21382 21835 21063 21814 21656 21729 21446 21965 21256 21665 21345 21585 20960 22189 21356 21879 21308 21859 21745 21575 21353 21968 21326 21767 21366 21896 21226 21821 21487 21675 21317 21991 21633 21808 21540 21837 21451 21899 21640 21674 21757 21735 21621 21921 21824 21858 21586 21591 19225 20853 20737 21085 21115 21244 21205 21273 21109 27879 23115 22345 21649 22110 21876 21600 21543 21898 21773 21482 21575 21917 21610 21595 21748 21770 21621 21569 21723 21876 21597 21781 21760 21729 21660 21268 21984 21721 21841 21330 21983 21575 21984 21464 21953 21673 21848 21550 21839 21537 21740 21738 21742 21575 21794 21501 22075 21511 21751 21413 22083 21469 21958 21350 22006 21426 21929 21506 22115 21572 21649 21412 22090 21485 21927 21433 22055 21274 21916 21390 22144 21405 21844 21377 22043 21487 21873 21379 22059 21367 21896 21409 22102 21350 21904 21329 22129 21278 22084 21392 22128 21181 22011 21492 21991 21330 22090 21425 21962 21481 22082 21453 21804 21564 22096 21225 22045 21577 22068 21230 22141 21421 22074 21186 21989 21393 21889 21255 21883 21388 21990 21511 21933 21360 21968 21346 21846 21237 21909 21347 21883 21223 22112 21313 21888 21180 21944 21359 22084 21358 22160 21258 21539 21280 21997 21305 21779 21253 21888 21306 22055 21441 22069 21248 21436 21924 22150 21545 21927 21361 21730 21318 21794 21488 21736 21436 21931 21383 21896 21512 21806 21229 21892 21480 21271 21829 21672 21582 22044 21575 21612 21485 22026 21390 21663 21671 21764 22044 21667 21985 21500 21737 21785 21507 21568 21771 21856 21607 21804 21700 21773 21462 22147 21384 21740 21607 21744 21504 21819 21632 21433 21652 21956 21452 21863 22184 21719 21994 21413 21949 21421 22167 21251 22151 21447 22039 21308 22113 21511 21818 21533 22048 21479 21853 21641 21901 21527 22095 21460 21902 21389 22068 21273 22103 21444 21991 21463 22020 21479 21916 21656 21926 21455 22061 21511 21871 21592 22016 21360 22050 21440 22024 21402 22130 21429 21937 21484 22025 21317 22039 21437 21925 21392 22212 21280 21949 21501 22103 21272 22272 21372 21978 21440 22071 21320 22073 21492 22033 21476 22061 21521 21906 21493 22081 21387 22135 21385 21970 21269 22229 21385 21970 21260 22098 21388 21997 21364 21853 21142 21943 21428 21610 21293 22062 21303 21707 21310 22176 21207 22016 21253 22016 21123 22043 21341 21943 21405 22039 21042 22436 21944 21991 21208 22139 21518 21684 21447 21817 22011 21465 21107 21937 21275 22119 21561 21673 21305 22049 21411 21749 21547 22126 21655 21949 21381 22064 21252 21671 21620 21867 21581 21998 21396 22041 21740 21654 21332 21673 21889 21579 21440 22042 21649 21496 21557 21770 21434 21693 21756 21699 21648 21780 21528 21875 21981 21767 21675 22094 21552 21909 21945 21760 21502 22146 21456 21844 21845 21623 21741 21767 4977 9588 10897 11528 13217 13056 13893 13751 14715 39476 30123 26089 25208 23654 23401 22961 23076 22346 22235 22107 22162 22139 22424 21761 22384 21718 65 10256 14313 15385 16502 16663 17286 17217 17784 17244 34356 27205 25712 23622 23815 22553 23093 22120 22766 21815 22632 21669 22474 21580 22356 21504 22353 6471 15381 16721 18487 18377 19362 19040 19682 19186 20033 29052 25905 23472 23559 22445 22818 22066 22354 21912 22119 21809 22337 21538 22401 21413 22337 21555 14707 17820 19757 19638 20472 20077 20877 20373 21015 20317 26084 23273 22967 22157 22365 21881 22314 21559 22336 21452 22141 22029 22060 21392 21991 21415 21463 18750 20716 21066 21345 20664 21788 20756 21848 20829 28253 23086 22592 21989 22187 21834 22203 21362 22250 21496 22069 21990 22011 21568 21929 21249 22087 21698 22045 21736 22113 21653 21851 21553 21684 21913 21915 21491 21735 21373 22032 21369 21975 21584 21888 21712 21447 21884 21570 21932 21703 21638 21846 21807 22151 21728 21934 21781 21658 21826 21504 21757 21745 21731 21975 21705 21928 21852 21504 21794 21344 21812 22379 21736 21320 21829 21488 22355 21220 21897 21398 21753 21805 21917 21775 22009 21533 21895 21703 21821 21697 21903 21463 22031 21479 22101 21139 21932 21509 21997 21552 22136 21377 22018 21458 21921 21600 21776 21345 22208 21360 22051 21521 21960 21518 22100 21317 22030 21496 21921 21475 22068 21226 22160 21376 22061 21404 22208 21216 22215 21377 21993 21376 22181 21315 22065 21560 21925 21436 22027 21444 21941 21475 22145 21319 22095 21537 21929 21356 22347 21307 22056 21512 21937 21420 22071 21252 22007 21453 21935 21429 22248 21545 21678 21303 22033 21169 22023 21323 22023 21211 22154 21371 22123 21109 21930 21335 21814 21603 21902 21405 21383 21528 22251 21463 22103 21443 21804 21295 21925 21431 21984 21394 21807 21205 21979 21515 21701 21401 21980 21658 21398 21376 21838 21474 21794 21751 21926 21626 21856 21819 21895 21737 21862 21792 21724 21445 21738 21790 21504 21543 22110 21659 21286 21625 22071 21865 21685 21847 21697 21750 21862 21925 21780 21529 21808 21862 21693 21666 21745 21939 21744 21759 21845 21655 21701 21352 21879 22025 21399 22056 21536 21846 21666 22013 21556 22182 21558 21944 21764 21965 21804 21676 21649 21844 21462 21894 21426 22167 21478 22018 21351 22075 21511 22002 21333 22124 21531 21991 21511 21977 21632 21369 21505 21988 21522 22019 21341 21937 21544 22057 21399 21907 21442 22080 21392 21911 21410 22140 21487 21914 21292 22167 21542 22120 21285 22073 21507 22169 21281 22039 21464 22128 21354 21968 21524 22035 21477 21959 21455 22078 21425 21983 21393 22114 21514 21971 21364 22243 21406 22003 21294 22016 21363 21941 21385 21943 21401 21848 21388 21773 21452 22001 21248 22008 21403 21972 21287 21546 21361 22034 21301 22176 21356 21983 21504 22032 21372 21957 21568 22023 21513 22136 21390 21744 21732 21553 21362 21924 21112 22237 21306 21952 21353 21618 21549 22097 21727 21923 21376 21862 21519 21664 21345 21827 21463 21904 21564 21894 21589 22164 21520 21817 21429 21908 21969 21831 21481 21986 61 8780 11267 12944 13953 14354 14714 14936 14993 15498 33197 28155 25328 24400 23204 23522 12052 15579 16922 17528 18072 18215 18167 18343 18346 34615 27882 25572 24225 23399 22728 13206 17377 18663 19320 19482 20413 19523 20327 19904 37263 26861 25030 23584 23207 22505 14534 18464 20067 20213 20327 20642 20872 20865 21038 21137 26221 23753 23137 22346 22579 15672 20489 20809 21494 21037 21671 21063 21740 21251 21734 24576 23438 22256 22413 21862 22378 21861 22456 21827 22326 21712 22180 21522 22288 21635 22327 21596 22097 21461 22140 21608 22365 21603 22286 21204 22067 21369 22114 21515 22220 21559 22320 21529 22191 21445 22155 21419 21968 21445 21983 21511 22142 21655 22069 21649 22204 21455 22039 21463 22057 21383 22077 21391 22166 21467 22080 21443 22009 21527 22002 21475 22017 21435 21961 21427 21789 21393 21987 21393 22017 21529 22029 21360 22148 21458 22111 21634 21583 21470 22136 21216 22221 21910 22034 21831 21865 21313 21575 21709 21920 21358 21941 21790 22032 21224 21965 21515 21915 21421 21989 21359 21839 21389 22078 21776 21893 21578 21753 21385 22145 21864 22029 21177 21877 
21959 21786 21961 21722 21998 21733 21964 21733 21888 21562 21790 21620 21891 21776 22007 21701 21991 21706 21958 21590 21693 21713 21988 21713 21969 21725 21974 21637 21838 21783 21863 21674 22049 21703 21957 21660 21944 21681 21888 21720 22052 21665 22007 21612 21882 21904 21853 21701 21987 21741 21896 21590 21672 21808 21824 21691 21863 21772 21785 21622 21961 21541 21891 21675 21960 21600 21946 21451 21895 21720 22020 21495 21913 21920 22128 21124 21227 21046 21020 21128 21184 21155 21141 21122 21096 21203 21157 21187 21225 21124 21217 21177 21234 21225 21261 21077 21333 21072 21357 21038 21348 21013 21366 21034 21345 21040 21449 21072 21341 21192 21379 21170 21339 21224 21320 21179 21377 21147 21275 21221 21429 21239 21272 21272 21295 21199 21377 21213 21422 21175 21443 21104 21505 21113 21440 21171 21492 21174 21537 21061 21505 21118 21527 21144 21528 21138 21524 21222 21367 21253 21460 21265 21416 21255 21435 21293 21468 21296 21496 21235 21544 21191 21568 21112 21537 21312 21472 21208 21459 21162 21513 21047 21425 21184 21479 21271 21491 21312 21443 21224 21547 21264 21430 21067 5911 7534 8843 9363 10439 10278 11098 11558 12026 32096 23511 22110 22102 21450 21749 21396 21251 21442 21393 21599 21413 21317 21667 21206 21358 21248 21208 21271 21472 21351 21520 21169 21050 21249 21431 21220 21255 21285 21559 21472 21484 21304 21368 21236 21420 21288 21466 21291 21542 21245 21605 21182 21559 21264 21693 21278 21621 21275 21571 21248 21552 21317 21612 21248 21506 21368 21558 21344 21587 21283 21683 21319 21636 21272 21658 21356 21477 21321 21645 21291 21459 21290 21353 21267 21444 21476 21436 21437 21337 21227 21493 21678 21290 21495 21319 21656 21420 21465 21482 21583 21248 21573 21427 21495 21419 21549 21520 21408 21424 21535 21554 21399 21562 21450 21291 21559 21481 21520 21367 21614 21479 21751 21409 21632 21504 22035 21409 21587 21447 21765 21390 21611 21463 21533 21413 21653 21400 21488 21359 21647 21393 21507 21485 21642 21391 21563 21467 21696 21277 21672 21460 21697 21319 21645 21461 21564 21411 21728 21322 21689 21401 21665 21370 21748 21413 21546 21504 21691 21305 21654 21448 21588 21472 21680 21486 21673 21522 21632 21435 21760 21376 21712 21445 21445 21494 21778 21329 21719 21355 21686 21521 9768 13467 14698 14966 15510 15641 16152 16083 16394 16317 24752 22533 22279 21640 21930 21570 21712 21392 21889 21331 21713 21435 21664 21408 21809 21182 21667 21336 21530 21321 21666 21229 21559 21428 21613 21365 21771 21470 21821 21459 21714 21660 21722 21397 21744 21509 21770 21466 21673 21512 21750 21412 21701 21572 21613 21292 21592 21466 21677 21395 21659 21377 21625 21425 21287 21434 21796 21601 21510 21270 21587 21644 21625 21424 21490 21440 21689 21606 21649 21533 21564 21658 21606 21472 21515 21307 21735 21613 21570 21472 21632 21408 21648 21832 21677 21486 21555 21476 21651 21752 21688 21488 21560 21381 21479 21392 21706 21905 21637 21592 21489 21552 21504 21651 21579 21773 21515 21621 21484 21652 21673 21719 21575 21728 21068 21459 21609 21676 21587 21765 21632 21648 21597 21667 21556 21761 21608 21763 21560 21692 21468 21659 21568 21752 21586 21787 21554 21690 21499 21569 21440 21725 21600 21856 21562 21804 21512 21639 21397 21687 21507 21790 21604 21806 21527 21715 21523 21657 21536 21801 21550 21840 21591 21777 20955 21768 21447 21772 21544 21831 21584 21836 21527 21725 21349 21636 21488 21784 21623 21813 21601 21799 16959 18262 18237 18889 18705 19205 18873 19335 19036 27734 22533 22260 21810 22029 21623 21793 21505 21826 21672 21637 21469 21730 21472 21808 21459 21830 21429 21720 21437 21820 21387 21697 21512 21784 21477 21877 21519 21702 21424 21720 21608 21760 21559 21819 21417 21740 21546 21801 21369 21699 21529 21570 21708 21582 21702 21739 21621 21863 21309 21728 21398 21784 21444 21737 21483 21745 21352 21561 21504 21780 21689 21799 21635 21764 21462 21646 21539 21490 21512 21815 21814 21888 21656 21687 21453 21557 21489 21719 21563 21591 21706 21952 21800 21699 21524 21635 21457 21634 21629 21706 21645 21767 21721 21810 21771 21721 21637 21707 21514 21606 21592 21775 21881 21880 21848 21674 21954 21489 21664 21431 21787 21643 21767 21622 21783 21703 21841 21536 21417 21498 21766 21648 21688 21699 21835 21704 21776 21651 21746 21737 21707 21504 21804 21637 21820 21652 21885 21591 21879 21696 21737 21613 21804 21548 21676 21619 21864 21616 21873 21718 21848 21657 21827 21666 21719 21536 21840 21605 21842 21634 21888 21648 21860 21595 21799 21513 21782 21528 21873 21640 21904 21614 21903 21569 21857 21531 21798 21495 21781 21556 21857 17664 20391 20425 20851 20622 20896 20696 20903 20704 21003 22816 22321 21809 22045 21669 21991 21568 21858 21381 21738 21491 21805 21639 21812 21651 21898 21609 21787 21552 21794 21453 21787 21465 21831 21564 21888 21638 21972 21529 21826 21477 21772 21175 21732 21563 21785 21549 21883 21617 21866 21495 21860 21515 21824 21574 21898 21785 21907 21578 21880 21469 21704 21509 21782 21488 21683 21420 21667 21492 21752 21558 21815 21577 21752 21486 21895 21559 21964 21609 21720 21506 21698 21584 21603 21475 21570 21440 21737 21677 21812 21702 21864 21654 21737 21683 21713 21659 21705 21677 21574 21706 21727 21561 21736 21520 21641 21688 21679 21687 21747 21625 21877 21756 21917 21872 21735 21670 21703 21685 21736 21587 21690 21713 21633 21751 21975 22039 21767 21693 21605 21694 21889 21741 21720 21920 21656 21901 21692 21882 21703 21648 21708 21924 21596 21861 21767 21773 21788 21680 21589 21792 21675 21885 21751 21831 21619 21776 21497 21833 21756 21846 21731 21767 21504 21805 21721 21877 21707 21740 21717 21913 21700 21882 21492 21817 21722 21873 21623 21736 21572 21898 21712 21834 21603 21883 21644 21850 21558 21852 21688 21921 21579 21062 21260 21655 21344 21572 21387 21704 21465 21576 23255 22193 21770 21869 21634 21977 21641 21833 21620 22004 21706 21831 21592 22025 21670 21856 21537 21910 21691 21736 21554 21875 21659 21948 21568 21901 21602 22067 21655 21965 21595 21869 21636 21929 21560 21928 21568 21981 21584 21792 21499 21889 21632 21763 21591 21790 21842 21970 21635 21928 21703 21711 21947 22035 21719 21922 21594 21859 21797 21760 21588 21806 21652 21920 21565 21861 21710 21716 21809 21796 21607 21897 21536 21867 21575 22217 21616 21883 21561 21719 21687 21864 21512 21710 21760 21956 21579 21728 21702 21921 21673 21762 21829 21761 21725 21770 21896 21645 21491 21764 21863 21786 21601 21883 21701 21741 21769 21840 21632 21767 21879 21664 21710 21827 21826 21798 21570 21914 21709 21701 21821 21916 21479 21810 21836 21553 21796 21689 21766 21602 21937 21773 21754 21773 21914 21722 21792 21874 21751 21638 21776 21760 21692 21747 21877 21762 21734 21787 21860 21660 21801 21777 21842 21456 21909 21689 21729 21709 21873 21500 21847 21743 21827 21607 21920 21693 21806 21681 21922 21516 21882 21671 21858 21649 21938 21624 22333 21720 21880 21549 21984 21657 21789 21656 21995 21504 21927 21637 21848 21127 21955 21719 21808 21713 21931 21610 21888 21735 21853 21512 21989 21628 21851 21705 21955 21572 21956 21617 21842 21569 21864 21666 21864 21691 21940 21499 21843 21651 21847 21512 21920 21564 21857 21605 21970 21559 21933 21675 21782 21584 21968 21591 21885 21531 21818 21560 21873 21637 21747 21648 21939 21577 21785 21776 21665 21557 21836 21520 21746 21556 21830 21529 21869 21607 21876 21633 21956 21623 21943 21747 22010 21780 22019 21800 21830 21916 21863 21641 21746 21695 21533 21708 21728 21600 21696 21719 21961 21996 21744 21861 21795 21705 21979 21658 21728 21792 21730 21642 21682 21776 21766 21600 21913 21576 21813 21864 21851 21666 21736 21714 21486 21649 21872 21668 21858 21843 21942 21661 21696 21804 21873 21526 21933 21701 21696 21869 21591 21856 21776 21891 21549 21828 21836 21753 21700 21845 21801 21777 21687 21867 21691 21937 21766 21913 21621 21902 21739 21830 21705 21963 21744 21453 21763 21837 21643 21847 21754 21774 21617 21903 21697 21757 21737 21901 21578 21856 21716 21952 21619 21922 21682 21772 21729 21911 21632 21824 21718 21905 21524 21991 21699 21874 21660 22016 21588 21915 21674 21896 21639 21972 21689 22034 21700 21941 21390 22017 21696 21854 21752 21929 21690 21968 21646 21988 21632 22016 21603 21856 21716 21930 21699 13856 14503 15225 15611 15931 15907 16288 16092 16611 26673 23431 22259 22272 22164 21830 21789 22078 21597 22121 21655 22053 21971 21886 21577 22029 21430 11933 17353 18177 18185 18702 18197 18823 18855 19137 18909 25015 22756 22215 22069 22029 21882 21751 21632 21696 21613 21844 21664 21933 21777 21749 21717 21931 16590 19361 19853 20266 19997 20391 20362 20673 20392 20627 23419 22281 22272 21996 21868 21834 21919 21960 21745 21922 21776 21770 21880 21801 21914 21713 21673 19644 20736 21207 21041 21102 21174 21161 21430 21155 32022 22600 22416 21856 21846 21728 21939 21609 22023 21686 21920 21779 21804 21816 21792 21783 21747 21789 21184 21252 21668 21541 21568 21639 21587 21601 21765 23410 22237 21756 22016 21750 21926 21760 21808 21780 21802 21753 21866 21702 21966 21593 22016 21628 21912 21706 21889 21718 22076 21731 21912 21607 21954 21504 21990 21609 21944 21677 21894 21696 21838 21691 21863 21703 21958 21540 21932 21543 21921 21696 21853 21714 21760 21736 21850 21641 22007 21521 22016 21538 21947 21605 21831 21668 21889 21637 21900 21581 21880 21814 21953 21869 21867 21622 22289 21699 21866 21512 22021 21610 21808 21596 21959 21544 21913 21573 21872 21706 21926 21697 21953 21397 21947 21457 21447 21603 21826 21741 21530 21632 21832 21521 21866 21536 21848 21640 21692 21831 21863 21613 21940 21704 21730 21706 21920 21765 21783 21777 21735 21795 21837 21549 21895 21654 21832 21771 21716 21559 21985 21592 21617 21871 21795 21704 21783 21851 21716 21598 21995 21698 21741 21945 21863 21767 22027 21589 21830 21739 21798 21643 21788 21899 21735 21585 22036 21741 21831 21907 21753 21874 21592 21876 21716 21722 21783 21896 21976 21713 21778 21731 21666 21816 21718 21802 21753 21873 21699 21786 21786 21878 21637 21893 21736 21890 21691 21902 21691 21760 21826 21927 21513 21844 21743 21921 21569 21923 21755 21882 21602 21904 21692 21776 21659 21988 21653 21841 21688 21941 21672 21954 21696 21963 21632 21890 21655 21937 21537 21955 21731 21884 21568 21984 21767 21725 21620 21949 21714 21848 21648 21944 21659 21880 21636 21952 21760 21923 21683 21904 21657 21843 21673 21907 21696 21989 21818 21923 21657 21882 21706 21867 21603 21917 21513 21898 21752 21874 21591 21667 21603 21804 21377 21957 21479 21968 21726 21746 21841 22048 22020 21825 21995 21959 21856 21817 21660 21665 21700 21866 21779 21672 21781 21801 21639 21960 21555 21699 21556 21939 21582 22016 21714 21754 21448 21944 21741 21754 21666 21905 21943 21767 21716 21726 21979 21792 21607 21589 21872 21824 21619 21749 21910 21830 21607 21625 21657 21883 21712 21760 21568 21869 21872 21820 21457 21789 21848 21808 21543 21691 21898 21726 21574 21747 21913 21909 21424 21899 21890 21700 21969 21696 21788 21603 21832 21660 22266 21712 21929 21813 21824 21693 21809 21875 21817 21691 21732 21777 21911 21810 21818 21649 21866 21725 21912 21707 21775 21749 21917 21731 21810 21591 21904 21821 21955 21605 21806 21740 21917 21703 21917 21642 21997 21728 21833 21633 21906 21738 21992 21638 21816 21626 22004 21710 21872 21546 21940 21696 12994 15294 16368 16530 17156 17033 17399 17164 17695 17491 24663 22840 22436 22048 22200 12104 18309 18684 19348 19384 19772 19524 19823 19435 19890 24869 23183 22230 22179 21811 22088 18997 20348 20340 20726 20577 21052 20769 21073 20778 26027 22658 22350 21982 22225 22000 19873 20738 21241 21093 21260 21286 21467 21328 21600 21322 22761 21996 22151 21968 22057 20033 21455 21290 21768 21340 21817 21807 21792 21632 21864 22468 22320 21687 22099 21741 21894 21717 21908 21746 21827 21595 21915 21625 21715 21656 21589 21559 21917 21732 21860 21920 21895 21657 21785 21728 21868 21984 22024 21700 21859 21675 21705 21723 21720 21646 21921 21905 22057 21851 21815 21649 21671 21564 21728 21602 22088 21626 21720 21816 21955 21926 21920 21815 21775 21633 21778 21800 21755 21783 21917 21896 21851 21517 21683 21873 21894 21790 21593 21846 21828 21975 21752 21847 21792 21947 21697 21723 21728 21786 21867 21827 21765 21845 21801 21819 21636 21760 21664 21832 21753 21957 21765 21943 21732 21909 21664 21741 21641 21856 21680 21946 21815 21960 21751 21952 21704 21851 21536 21789 21680 21895 21707 21914 21737 
38087 36100 38040 35521 38565 35692 38067 35667 36938 33562 36050 34184 37081 35745 38703 35281 38464 35330 37957 33949 35121 35183 38241 35314 38016 35676 38184 34439 36679 36084 37065 34872 38753 35387 37960 34755 37708 34905 36896 35360 38807 34735 38651 34304 37145 37152 37008 35214 38310 35908 37132 33920 34652 36078 36277 35188 37031 35888 36016 34308 37953 33344 37034 34978 37880 33900 37778 42584 37616 35400 38402 43144 37777 37432 39736 36551 39187 35252 37443 33565 38416 35899 35529 35584 37895 37056 38528 38355 37624 33543 36148 34969 36546 35616 36257 35501 36232 36210 34407 37144 37056 37516 37438 35189 34464 34102 38056 34610 36626 34272 35767 34713 41568 40338 41160 39996 41648 39621 40808 40373 42416 40749 40634 40612 41197 40306 41677 40430 42434 40004 42506 38968 32797 38860 42213 39848 43011 39888 33295 38230 32750 39001 33293 39010 33120 38907 33057 40000 41911 40528 42668 40625 42187 40654 42608 41173 42900 40916 43120 40640 33418 39744 33556 38783 33224 40583 42688 40219 42727 39752 33056 38157 42138 39779 43031 40919 43140 41097 42560 40394 33625 40080 42388 38804 30941 27816 30708 26246 27496 25538 34397 29729 34705 43791 44653 40130 39696 42601 36086 41683 40472 42423 41975 34489 41913 41303 34976 39906 41786 40268 40084 40769 42702 41851 33056 39318 38426 40225 42509 40337 40560 40877 33820 42336 43142 41145 41792 40504 42316 40896 42844 41152 33504 40432 34286 39718 33760 40087 35377 40627 34517 40552 33820 39889 33385 40884 34401 39916 32827 41378 33720 41026 34057 40522 35142 41088 34461 40326 34804 41436 42998 41415 34810 40759 42728 41033 41701 40694 42450 42960 42641 42753 41590 40584 43165 35310 40666 43280 41458 34767 42016 42912 43143 34336 39904 33835 42032 43340 42529 33792 32633 41552 42206 33677 33184 41767 33796 42272 41112 33848 42659 33092 41560 34553 42754 36182 41870 34356 32433 38470 41960 34121 42343 35985 41800 34528 42560 33580 41866 34829 41680 42970 42053 34956 41592 33046 42758 34707 41847 33933 42568 35200 40618 34925 42354 35308 41083 34793 42464 33900 41840 35576 41037 35279 41805 34898 41587 35927 41991 33600 32392 34976 40851 34781 42200 34052 42337 35008 42859 35145 32832 33927 42240 35767 41323 35348 42296 42720 43274 36120 41101 35712 41552 35237 32832 30727 29472 32261 35334 31152 32407 37781 37485 28983 39562 36536 33449 41202 34525 37592 33568 34981 41472 37296 41238 35424 42330 34789 41671 36471 39826 34898 41113 33340 40936 34836 40298 33792 41968 34568 41536 36154 42743 36852 42530 35512 34643 35354 41764 35783 32792 35642 42559 35122 32705 35624 41856 35428 33513 34164 40663 34026 42483 35261 41732 34983 41400 34608 41973 41070 42509 36336 33946 32673 40300 34022 34343 34279 41840 43087 42448 35340 34055 34297 33156 33419 34488 33994 42336 33289 40913 35906 34304 33395 42314 34359 41654 34549 36434 34986 42861 33754 42496 34807 35687 34901 42592 33728 41491 43120 41900 35479 37252 34385 33738 42635 33536 32392 34338 33716 35846 32955 34151 42682 34758 34759 35427 33718 35215 38492 42631 34451 34789 33757 35639 34048 34196 33968 34628 33280 35476 33988 35620 33382 34972 42538 35034 33329 35609 33682 36020 33303 34896 42995 33846 41945 35852 33808 36597 33556 36152 32744 34336 41708 35365 32717 36010 33957 36263 33152 35188 32913 34464 32881 36071 33453 36369 34001 35719 37441 35747 42422 36129 33194 36524 33623 36518 33160 35447 41377 34485 42550 36192 34432 36303 33927 36176 35573 39232 39255 35885 33510 38833 35693 40400 37532 38248 33542 41079 36441 38768 34544 35954 32633 36236 34664 34275 42643 35716 42440 36397 42520 36818 42242 35596 42408 36739 41810 35276 32704 35748 42695 37450 33207 35017 41878 35569 34013 35392 33555 36423 42071 35938 33298 36109 41650 35377 33056 33336 35124 33797 35054 35696 34293 36944 41110 35544 41784 36156 42232 35897 42888 35936 41400 33792 32416 35667 35024 36216 34310 35547 42508 34848 33127 42598 33082 36345 36385 36944 34553 35013 42477 33779 42647 35756 33621 33856 35106 37683 36185 35125 32868 34134 42280 34472 34459 35128 34496 35783 35408 36184 35926 35416 34312 35241 32805 33911 33709 35946 37216 37152 36757 34856 37778 42856 34817 42263 36407 34525 35800 34281 35992 35264 36570 32995 41976 43286 36076 34295 34845 35056 36667 35136 35652 34496 35568 35579 35291 32481 36087 34340 36384 34449 37304 34034 37176 34935 35588 34260 36190 33337 34739 34193 36804 34069 36922 35417 36667 34642 36443 34615 35417 32932 36352 34080 36512 34200 36872 34325 36763 34070 36188 32852 35813 32948 36876 34314 37079 34338 37444 33565 36694 33229 36024 43021 36263 33369 36693 32578 41592 42349 36408 33581 36247 34323 36650 34357 37660 36597 41703 36480 38984 34901 38442 33497 36689 41657 35899 42871 36672 34484 36188 34517 37184 34187 36048 33201 35872 42531 36411 42624 36937 33625 36833 34379 38000 33205 36247 42727 36139 39770 35628 33622 35906 33450 37200 34214 36912 43067 37145 33032 36144 33655 37122 36036 37380 33774 37002 42796 35403 32784 35800 42635 35242 42055 34981 42757 36032 33478 36362 33720 35629 42928 37610 33675 37944 34224 35232 32599 34824 33533 33916 42554 33804 41957 35895 34976 36202 35170 36845 34592 35556 34927 35156 34688 35139 34928 33594 35091 35652 33512 35397 32720 34224 34844 35019 35047 35716 34352 37084 35943 37608 36977 35728 34753 35195 34936 35458 33801 34920 35174 34132 35828 38281 38971 35985 35200 34039 35120 36966 35840 35300 37320 34568 37344 35131 37184 35315 34262 35157 37440 34028 36872 35884 35959 36041 34721 33793 35808 34912 37313 35957 36648 34292 35622 42954 36901 35925 36745 35564 35843 32512 36213 35421 37140 35368 35648 35335 37442 35100 37172 42856 36738 35463 36992 34456 35459 33494 37144 35155 36556 34054 37235 34486 36736 33490 36724 34951 37425 33881 38247 40440 34883 41079 33778 41650 35367 42546 33919 41580 40669 36006 37156 34230 38164 34496 36535 34212 38400 35313 36628 33827 38496 34873 36645 33116 37279 35206 35496 33282 36999 34772 37825 33473 37296 33989 38986 34816 38136 34144 37040 34269 37590 33492 37415 33448 38272 33706 35798 43063 37368 34145 35616 33959 36068 36592 38050 34397 37473 35345 35438 37959 38789 35616 37432 33993 36818 36216 35489 33728 36261 34448 37266 33748 36848 35400 35217 36196 36049 34195 37168 33032 36981 33818 40602 34265 37248 33594 35363 35061 36851 32781 35200 35450 37837 33901 35213 35120 37412 34886 35539 36528 35617 35552 35757 37146 34595 42792 35930 37067 36046 33938 37228 35213 35738 35799 36471 34096 35764 37263 34551 35304 36464 36420 36152 33505 37337 35424 35121 36544 37514 42914 36512 36672 33344 35927 35032 35704 33898 37584 36016 35850 35938 37464 35484 35882 37022 35948 34329 35626 35456 35057 35702 37152 35641 35562 36100 36853 34683 36160 35818 36588 42317 37707 35113 35392 35331 36985 43040 37179 35946 36502 34215 37277 35248 36341 34845 37403 32966 37074 34925 36753 34432 37601 34316 41869 35576 37095 33496 38010 34704 36114 34503 38473 32650 37574 34410 36619 39208 38103 35590 36083 35222 37741 34204 36864 35718 36951 32809 38244 34504 36851 35241 37908 33621 37763 34226 36514 33512 36783 34648 36853 35184 37672 43181 37031 34561 36804 32772 37207 33621 36696 34118 37944 33680 37707 35008 35911 33600 37829 34067 37284 33264 36300 33422 36896 34374 35687 34272 37702 33783 35916 35697 34599 33401 36512 32780 35483 33330 36416 33088 37024 34249 36950 34240 37788 34503 37856 35843 38624 35961 38498 36220 36547 37541 37128 34471 35552 35288 33213 35126 35268 33783 34774 35424 38003 38548 35642 36941 36144 35224 38312 34720 35252 35876 35405 34362 34737 35640 35712 33808 37365 33652 36252 36904 36948 34656 35457 35186 42912 34744 36843 34701 36726 36751 37840 34869 34833 36202 36993 33080 37671 35236 34856 37107 34028 36624 35717 37159 33512 36322 36640 35880 35036 36706 36247 35830 35084 37072 35201 37607 35803 37461 34371 37336 35802 36529 35233 38116 35621 42605 35994 36748 34535 36801 35873 35954 34144 37440 35073 35968 35624 37395 33761 36593 35274 37697 34345 37383 34889 35788 35415 37496 34144 36203 35372 37236 32977 38368 35228 36967 34696 38218 33861 37484 34882 37098 34496 38004 35132 38520 35144 37785 41920 38656 35020 36912 35769 37665 35108 37892 34631 38199 34172 38202 34136 36611 35276 37632 35159 33673 30389 37906 32615 35762 35512 39233 37716 31685 36378 43328 41629 41231 40304 36730 36203 39362 34247 39692 34853 38893 38281 37464 33796 38634 42332 34290 39370 38300 38467 33768 38440 35136 35387 38272 36201 39605 36259 40844 39379 38894 37351 35968 34080 34804 34241 36576 34537 37756 35896 35777 35367 37733 31521 40301 36296 40370 37845 41871 41623 34279 41522 33778 43276 41632 41237 38699 37171 36643 37716 37998 35736 37447 35768 35779 37111 36256 37485 35288 34789 33708 34360 39973 38210 39040 39749 39625 42384 39633 43297 34564 42429 36960 36796 35351 37750 34216 38572 35096 37317 35976 36258 36324 35911 36064 35753 36149 39496 40296 34865 33178 33248 34298 33736 33817 35621 43035 41465 36135 38279 35873 37610 35557 36097 35848 36223 35852 36999 35194 38152 34019 38199 34502 37292 35266 37008 35409 39168 35682 37344 34250 37756 32618 38224 34240 37687 35047 37160 34945 36696 35187 37024 35328 37954 33224 37576 33464 37356 34952 36914 35242 35473 35495 36775 34432 38631 33002 38135 33189 37857 34167 36584 34676 36992 34379 37204 33923 37017 36416 37849 37234 37169 34365 41121 35352 36953 32793 38387 34250 36029 33964 37959 33290 37345 33712 36792 35280 37574 35088 37785 41896 38243 42506 42788 34375 36317 35803 33080 33927 36393 32896 36848 33017 36553 34304 34988 36614 37081 34332 37632 35174 35408 35181 37303 35814 36056 35827 35660 36112 36741 33513 37200 34604 36416 35933 35253 33545 38119 33920 34060 37178 36169 35105 36017 36928 35292 34048 38453 35125 35728 37868 37144 35908 38699 34007 36416 35766 36139 34515 35984 37368 35749 33724 38513 35904 36616 37408 35913 37008 33850 36960 35288 35397 36036 37149 38145 35328 35764 35533 34583 36256 35373 36172 35848 37012 35165 35971 36007 37163 34395 37138 35557 37034 35194 37367 35210 35456 36357 37741 32968 36503 35911 37470 33560 37472 36024 37217 33978 37063 35125 35651 34706 38220 34656 36544 34951 37773 34775 37770 34973 38105 34183 36969 34710 37615 33181 37808 35616 37243 33442 38011 35946 35609 34172 37943 35301 36664 34322 37688 34805 37057 34276 37654 35512 37563 35008 37105 34660 36656 34848 37325 34938 38340 36531 37595 34688 37153 35269 37072 34080 37530 32937 37112 35792 36996 34028 34632 33970 36160 41453 38222 42954 38226 35692 35619 36600 38702 38541 36499 38572 38208 36800 36471 34672 34545 34983 36944 35937 34695 35911 36208 34459 37832 33520 35015 33304 37661 33931 38180 35316 35808 42270 38034 35890 35833 34610 37191 37991 35940 35255 35540 38330 36000 34202 33780 36803 36314 34284 35699 37397 36608 34228 34308 34533 37250 35175 35448 33367 37025 36954 36504 42460 36448 36728 36141 33368 35026 37211 35624 33632 35635 37451 37464 42008 37633 37129 35092 38006 34976 36026 34027 36400 34662 41233 35338 37643 36438 36314 35177 36197 37125 36480 35176 35428 35778 37520 36288 36437 34427 36929 35610 37340 35392 36040 35791 37616 35594 36205 33984 37063 36623 37978 34171 36277 35681 37605 35351 37574 34453 38524 35425 36583 34195 37178 35677 38314 34440 36241 34368 38408 35474 36880 33351 37586 34965 34424 38864 40327 30676 36960 36160 40097 37609 33431 30853 35277 36890 42907 38992 40647 35763 39648 33772 40275 41047 35392 32183 35785 41562 36608 37865 41003 41159 40608 36548 39169 37133 41418 41430 35058 32896 38129 35113 38356 35336 40416 35014 42136 38658 40902 38556 36274 34620 40327 38928 40480 40869 42954 41288 34076 41000 36472 38509 40197 38121 39096 37998 42754 41034 35904 41299 36663 36530 35924 34066 36802 43245 41859 35381 39448 35944 37200 35433 37270 35713 36496 34069 37482 34443 35250 34466 33840 33473 37491 35533 36812 37392 37376 34688 35958 35317 37003 38176 38580 35169 36867 34979 35148 35500 35296 34504 37388 37323 39054 37063 36530 34440 34792 33511 35189 33888 39094 34504 35240 36285 37949 37710 37425 36561 36088 34200 35719 36096 35961 36064 37616 37229 36966 33072 34793 36965 37212 36220 33927 36655 36451 38325 35835 36864 35937 37944 35095 35499 35283 35981 37121 36560 35763 36737 36234 36556 34253 35411 34464 36416 35862 37981 35840 37922 35552 37398 34562 35733 34368 36624 34742 37816 36562 37952 35993 37739 35170 36880 33031 36032 34714 37255 35372 37443 35697 
23842 24028 23634 24045 23494 24128 23825 24169 23825 24236 23704 24152 23630 24159 23493 24186 23720 24243 23773 24249 23699 24059 23635 24348 23706 24164 23789 24172 23815 24104 23605 24037 24204 24126 23771 24227 23715 24176 23634 24104 23681 24138 23654 24145 23783 24147 23554 23785 23640 24135 23719 24214 23618 23960 23689 24020 23633 24085 23716 24069 23570 24161 23596 24119 23720 24123 23606 23915 23777 24045 23762 24109 23524 23878 23534 24071 24004 24119 23444 24156 23712 24210 23737 24035 23993 24041 23779 23767 23527 24091 23690 24059 23901 24125 23717 24087 23769 23964 23473 23580 23749 24071 23589 23979 23497 23839 23609 24037 23829 24084 23573 23619 23884 24123 23812 24039 23715 23734 23874 23962 23863 24060 23836 23772 23709 23849 23862 24027 23568 23798 23638 23840 24019 23808 23671 23955 23735 24055 23878 23858 23808 23870 23719 24157 23887 23888 23784 23946 23918 23200 22904 23303 22832 23305 23013 23347 22661 23309 22725 23388 22756 23361 22856 23297 22870 23180 22894 23191 22828 23235 23073 23389 22836 23080 22916 23217 22847 23178 22999 23243 22726 23323 22737 55 5657 7923 8483 9451 9313 10697 10352 11224 10896 35322 30124 28529 26787 26372 25512 25466 24896 24933 24597 24648 24030 24334 23947 24252 23936 23954 23819 23944 23897 24163 23625 23738 23510 23940 23463 23928 23533 23914 23895 23693 23397 23783 23302 23698 23329 23648 23141 23446 23394 23492 23260 23408 23463 23453 23454 23424 23375 23450 23319 23465 23328 23278 23470 23389 23208 23376 23286 23317 23280 23463 23342 23348 23373 23381 23275 23413 23214 23363 23099 23267 23114 23440 23444 23535 23150 23328 23239 23176 23257 23040 23184 23338 23213 23168 23337 22984 23633 23172 23351 23175 23366 23136 23538 23222 23250 23192 23456 23237 23228 23255 23440 23123 23337 23338 23317 23040 23500 23140 23376 23079 23507 23149 23416 22992 23493 23121 23287 23067 23414 23184 23276 23144 23417 23095 23319 23040 23527 23115 23345 23101 23479 23093 23370 23159 23533 23094 23431 23099 23441 22961 23470 23081 23431 23010 23495 23054 23356 23069 23539 22918 23548 23084 23441 22996 23509 23027 23375 23100 23452 22993 23475 23074 23315 23140 23458 22967 23466 23075 23418 23063 23544 22902 23531 22964 23355 23075 23518 22949 23512 22986 23479 10727 13588 14132 15585 15545 16269 16261 16689 16583 17303 28770 26913 25507 25481 24688 24952 24218 24555 23821 24141 23796 24235 23831 24071 23509 23937 23560 23985 23324 23957 23408 23680 23405 23783 23456 23445 23249 23792 23047 23943 23265 23702 23400 23296 23268 23698 23557 23639 23232 23724 23250 23599 23030 23675 23217 23307 23230 23543 23391 23553 23371 23508 23296 23654 23368 23477 23095 23618 23248 23410 23216 23397 23461 23559 23270 23492 23129 23434 23383 23287 23206 23360 23392 23572 23249 23373 23132 23340 23515 23542 23169 23499 23049 23278 23443 23495 23334 23318 23227 23288 23404 23527 23460 23324 23338 23374 23244 23491 23203 23381 23552 23184 23520 23254 23571 23168 23625 23243 23466 23591 23321 23319 23535 23396 23446 23371 23474 23244 23491 23251 23528 23405 23565 23202 23494 23188 23512 23310 23552 23253 23608 23195 23417 23064 23475 23230 23685 23278 23562 23257 23488 23298 23465 23108 23584 23202 23627 23268 23573 23563 23447 23108 23549 23232 23607 23244 23612 23169 23783 23053 23532 23109 23644 23179 23664 23181 23586 23126 23449 23082 23658 23193 23669 23236 23612 23183 23596 23125 23476 23159 23584 9517 17440 18088 19044 18877 19570 19381 19982 19720 20234 28881 26061 24727 24824 24080 24355 24015 24184 23661 24020 23584 23892 23584 23826 23511 23981 23417 23865 23338 23820 23312 23795 23440 23703 23382 23730 23366 23730 23333 23768 23346 23603 23293 23689 23621 23764 23272 23625 23264 23600 23325 23569 23349 23730 23460 23677 23328 23588 23375 23482 23256 23481 23167 23643 23309 23775 23345 23735 23338 23565 23299 23425 23319 23568 23592 23688 23376 23383 23191 23372 23232 23353 23259 23529 23502 23744 23552 23512 23344 23553 23363 23282 23187 23351 23516 23703 23542 23570 23336 23289 23299 23320 23419 23460 23385 23610 23552 23523 23399 23414 23437 23411 23177 23244 23117 23509 23556 23362 23608 23501 23687 23220 23508 23066 23658 23340 23607 23302 23632 23505 23620 23368 23464 23412 23492 23300 23459 23351 23673 23348 23607 23365 23641 23566 23487 23175 23592 23323 23662 23290 23640 23390 23697 23377 23648 23296 23458 23180 23602 23244 23605 23313 23694 23287 23729 23315 23625 23508 23540 23152 23604 23292 23777 23286 23712 23337 23723 23191 23639 23118 23601 23161 23680 23267 23760 23283 23796 23278 23670 23190 23701 23131 19092 20237 21170 21043 21603 21371 21808 21460 21844 32016 25458 24183 24404 23728 24148 23620 24058 23508 23928 23392 23896 23391 23960 23274 23797 23387 23853 23539 23812 23228 23557 23452 23737 23350 23623 23392 23736 23271 23705 23348 23706 23256 23688 23232 23638 22871 23549 23217 23612 23262 23727 23287 23733 23334 23782 23380 23831 23336 23777 23229 23474 23138 23587 23196 23528 23234 23600 23169 23584 23358 23672 23383 23594 23404 23652 23393 23641 23452 23661 23312 23607 23304 23573 23360 23622 23345 23557 23351 23584 23349 23499 23280 23554 23401 23459 23367 23417 23431 23447 23413 23448 23468 23607 23367 23667 23622 23669 23704 23723 23520 23687 23381 23519 23378 23665 23412 23449 23430 23596 23480 23590 23619 23586 23658 23512 23514 23539 23330 23334 23706 23438 23632 23501 23661 23350 23735 23232 23627 23392 23552 23519 23664 23463 23705 23463 23512 23394 23433 23488 23697 23433 23698 23360 23562 23403 23703 23403 23749 23426 23734 23320 23616 23379 23803 23432 23686 23312 23562 23360 23835 23382 23641 23828 23802 23383 23730 23229 23733 23392 23754 23379 23607 23314 23844 23351 23665 23347 23821 23319 23786 23185 19641 21855 22616 22223 22882 22455 22941 22433 22711 22613 25193 23829 24070 23659 24016 23420 24055 23525 23844 23390 23887 23411 23940 23264 23893 23347 23826 23312 23721 23335 23879 23284 23700 23394 23776 23300 23698 23432 23706 23483 23796 23350 23755 23188 23777 23419 23796 23288 23645 23547 23947 23292 23765 23235 23768 23336 23469 23318 23690 23398 23780 23376 23361 23380 23462 23735 23890 23429 23665 23382 23690 23450 23562 23403 23760 23311 23688 23344 23733 23372 23628 23590 23688 23309 23698 23481 23847 23305 23706 23520 23780 23248 23568 23588 23552 23512 23545 23503 23570 23472 23577 23673 23508 23409 23594 23603 23412 23507 23815 23517 23538 23447 23680 23397 23697 23714 23579 23415 23575 23552 23493 23495 23801 23387 23385 23542 23816 23078 23596 23740 23447 23666 23714 23182 23239 23718 23452 23672 23569 23864 23414 23895 23524 23685 23385 23638 23591 23586 23712 23719 23648 23605 23643 23799 23465 23666 23596 23719 23465 23882 23472 23652 23377 23834 23388 23642 23586 23773 23475 23781 23545 23635 23481 23800 23431 23789 23515 23782 23424 23880 23527 23641 23451 23877 23324 23813 23496 23771 23359 23925 23365 23702 23424 23873 23345 23886 23403 23753 23396 23924 23365 23767 23473 23828 23320 23873 23456 23706 23377 23921 23328 23751 23489 23861 23168 23948 23377 23786 23343 23859 23303 23809 23312 23878 23339 23783 23348 23752 23424 23859 23541 23883 23603 23704 23405 23815 23322 24125 23313 23817 23235 23789 23419 23856 23268 23936 23415 23872 23431 23996 23402 23985 23542 24004 23544 23947 23399 23740 23426 23783 23470 23758 23540 23661 23457 23799 23351 23733 23518 23687 23391 23795 23272 23769 23441 23705 23463 23714 23445 23499 23436 23744 23410 23758 23571 23645 23516 23729 23804 23744 23555 23832 23607 23735 23779 23648 23471 23719 23436 23592 23614 23797 23511 23703 23821 23683 23556 23683 23463 23621 23631 23718 23621 23675 23829 23746 23583 23633 23444 23531 23542 23129 23865 23562 23712 23424 23698 23586 23675 23353 23749 23648 23580 23479 23772 23532 23719 23752 23695 23555 23745 23557 23783 23757 23924 23560 23700 23598 23921 23463 23832 23609 23709 23520 23811 23527 23660 23524 23808 23447 23748 23560 23927 23360 23854 23496 23788 23483 23920 23446 23651 23572 23902 23369 23842 23503 23813 23400 23970 23436 24017 23478 23949 23304 23950 23455 23811 23468 23941 23397 23843 23484 23833 23448 23965 23426 23865 23519 23848 23481 23968 23392 23909 23353 23952 23361 23847 23462 23831 23566 7018 10512 12048 12508 13405 13391 14007 13839 14689 14465 32464 28244 27104 25926 25930 25148 25415 24666 25009 24628 24908 24326 24807 24576 24727 24103 24450 13396 16508 16775 17468 17905 18440 18139 18924 18573 19105 29044 26935 25664 25437 25000 25145 24768 24935 24424 24612 24343 24380 24354 24176 24204 24300 24329 17926 19441 20367 20355 20719 20768 21280 20893 21155 33414 26730 25445 25229 24930 24872 24412 24693 24281 24707 24200 24426 24261 24469 24435 24155 24288 24294 20416 21693 21696 22041 21913 22024 22429 22220 22432 28117 25196 24833 24400 24352 24544 24041 24404 23951 24416 24080 24256 24056 24165 24098 23869 24077 20059 22398 22927 22784 23207 22890 23288 23040 23252 23004 25573 24280 24519 23993 24242 24016 24225 23957 24078 23936 24183 23975 24258 23771 24275 23737 24221 23786 24156 23904 24109 23814 24163 23783 24241 23653 24277 23753 24252 23703 24150 23753 24101 23721 24001 23796 24170 23734 24133 23689 24110 23710 24085 23769 24029 23769 24199 23758 24180 23596 24187 23530 24220 23597 24080 23611 24248 23665 24018 23621 24109 23536 24064 23655 24098 23592 24041 23656 24020 23558 24053 23036 24272 23653 24175 23655 23947 23945 24168 23522 24092 23534 23982 23828 24007 23595 23769 23508 23998 23719 24021 23596 23797 23492 23992 23749 23968 23836 23904 23609 23884 23860 24080 23632 23808 23773 23948 23690 23917 23727 23790 23975 23884 23639 24008 23620 23844 23760 23751 23719 23936 23783 23762 23995 23879 23754 24083 23717 24160 23828 23809 23772 23850 23743 23808 23838 23945 23731 23691 23892 23751 23783 23991 23773 23753 23803 23642 23928 23506 24029 23728 23944 23625 23995 23212 23903 23690 24005 23637 24035 23828 23938 23830 24012 23702 23780 23859 24007 23498 24027 23733 23981 23536 23992 23732 23863 23743 23958 23792 23882 23671 24016 23531 23950 23735 23820 23602 24005 23628 23910 23624 24061 23561 23923 23655 24067 23506 24036 23682 23981 23516 24064 23644 24022 23456 24088 23654 24135 23516 24064 23633 23836 23639 24084 23552 23891 23681 24064 23744 23927 23613 24070 23453 23991 23616 24121 23502 23997 23539 23942 23591 24055 23531 23842 23568 23918 23755 24128 23625 23975 23527 24217 23506 24055 23625 24032 23538 24033 23700 23930 23410 23915 23490 23831 23622 23892 23271 23912 23639 24033 23687 23938 23312 23964 23648 23823 23624 23991 23434 23835 23389 23953 23488 23943 23718 23874 23621 23911 23518 23822 23571 23824 23570 23731 23514 23991 23780 23601 23632 23831 23737 23744 23616 23897 23651 23708 23688 24012 23716 23811 23664 23824 23843 23838 23700 23864 24039 23936 23671 23852 23812 23943 23568 23738 23757 23990 23592 23754 23680 23968 23783 23756 23649 23911 23812 23641 23951 23184 23703 23963 23846 23520 23831 23729 24064 23679 23776 23732 23906 23763 23814 23708 23799 23863 23921 23632 23831 23767 24008 23690 23755 23667 23981 23710 23862 23541 23922 23696 23993 23616 23854 23752 23927 23723 23683 23480 24008 23727 23997 23730 23799 23592 24064 23637 23909 23593 23983 23652 23962 23464 23943 23645 24073 23535 23927 23568 24021 23591 23994 10181 12630 13191 14439 13948 14969 14926 15625 15421 37677 29477 27681 26357 26200 25417 14843 17421 18688 18699 19331 19031 19573 19280 19916 19456 29458 26722 26423 25564 25676 14242 20000 20352 21178 21088 21599 21289 21671 21399 21847 28524 26545 25303 25466 24780 25102 20647 22204 22033 22827 22229 22896 22587 22868 22687 29068 25376 25233 24731 24541 24480 22620 22721 23517 23239 23533 23155 23520 23079 23309 23041 25202 24429 24576 24259 24532 24253 24308 24086 24521 24082 24368 24078 24392 23842 24391 24079 24273 24208 24333 24183 24160 23964 24202 24249 24255 23983 24145 23927 24049 23922 24000 23958 24200 24198 24111 23859 23982 23956 24071 23838 24221 24032 23970 23905 24278 24197 24313 24051 23965 23996 24041 23810 23886 24040 23945 24074 24258 24087 23993 24023 23973 23973 24105 23809 23927 24163 23907 24281 23881 24236 23737 24064 23791 23976 23975 24199 23880 24076 24014 24071 23863 24112 23803 24020 23817 24020 23867 24108 23866 24185 23863 24130 23747 24072 23826 24088 23847 24132 23940 24096 23811 24098 23794 24108 23674 24000 23733 24167 23789 24212 23829 24192 23748 24050 
23080 23557 23211 23216 23064 23357 22993 23340 23323 23392 23488 23585 23436 23393 23005 23337 23424 23302 23245 23416 23279 23737 23417 23258 23176 23276 23088 23175 23262 23491 23225 23431 22966 23060 23032 23337 23068 23549 23580 23529 23000 23378 22950 23104 22998 23644 23241 23293 23096 23233 23202 23494 23458 23023 23156 22881 23237 23127 23708 23243 23301 22933 23083 22929 23552 23116 23372 23123 23292 23033 23464 23190 23248 23272 23384 22711 23424 23227 23551 23152 23300 22800 23442 23111 23655 22974 23349 22945 23496 23077 23472 23097 23428 22785 23666 23010 23625 23119 23393 22893 23501 23015 23627 23083 23501 22853 23457 22996 23607 23088 23354 22897 23219 22973 23621 22951 23552 22869 23349 22936 23671 22968 23543 22721 23360 22941 23641 22882 23456 22722 23428 22948 23506 22925 23280 22874 23488 23109 23453 22839 23271 22887 23545 23024 23507 22864 23570 22945 23683 22964 23477 22640 23510 22791 23561 22817 23317 22779 23490 22784 23553 22785 23184 22801 23491 23088 23352 22789 23409 23031 23584 22922 23609 22712 23311 22843 23442 22475 23353 23096 23386 22679 23284 22620 23360 22858 79 233 75 111 77 63 75 22092 22140 21257 21165 20268 20240 19314 19513 18810 18988 18536 18688 18137 18187 18061 18045 17897 17973 17704 17765 17593 17793 17389 17830 17225 17866 17289 17655 17100 17679 17143 17741 17074 17640 17169 17615 16985 17623 16919 17611 16901 17644 16859 17691 16859 17701 16860 17728 16762 17698 16825 17669 16849 17737 16842 17693 16888 17655 16937 17653 16958 17598 16921 17734 16839 17761 16878 17700 16885 17773 17001 17733 16974 17703 17063 17814 17016 17419 17189 17736 17142 17729 17008 17367 16963 17667 17303 17607 17218 17818 17287 17963 16980 17578 17033 18069 17136 17966 17385 18071 16884 17922 17227 17825 17113 18075 17410 17628 17649 17923 17961 18198 17165 17226 17633 17933 17616 18002 17618 17777 17958 17932 17568 17723 17441 18016 17623 17861 17527 18412 18201 17731 17392 17925 17584 18041 17513 18306 17469 17866 18311 18023 17491 18216 17932 17965 17642 18125 17859 17877 18194 17801 17948 18432 18000 18025 18087 18247 17639 18158 17851 18001 18132 18067 17719 18197 18037 18144 18168 18294 17908 18375 18306 18081 17938 18332 18096 18466 18168 18448 18088 18763 84 91 77 72 189 1238 1265 1383 2164 23972 25113 23911 23575 22425 22406 21693 21094 21015 21050 20572 20513 20253 20170 19847 20075 19851 20167 19629 19919 19567 19566 19344 19777 19287 19490 19213 19723 19165 19470 19223 19592 19081 19334 18981 19552 19044 19239 18896 19549 18923 19210 18759 19495 18978 19453 18776 19504 18933 19389 18786 19349 18913 19509 18839 19260 18873 19484 18906 19368 18664 19421 18880 19541 18778 19360 18820 19607 19000 19437 18769 19340 18935 19482 18999 19508 18819 19379 18999 19529 18848 19483 18807 19511 18999 19620 18873 19409 18787 19488 18862 19478 18894 19513 19098 19435 18947 19682 18737 19474 18637 19511 19033 19694 18944 19636 18927 19235 18583 19475 19429 19556 18891 19660 18843 19575 18935 19216 18714 19826 19688 19672 19050 19381 18903 19822 19072 19672 19146 19091 18858 19466 19286 19841 19451 19729 19196 19104 19193 19690 18968 19783 19213 19783 19207 19534 19341 19599 19060 19499 19122 19993 19654 19449 19621 19577 19494 19348 19485 19659 19479 19762 19571 19593 19287 19652 19472 19665 19800 20039 19329 19661 19247 19767 19281 19569 19655 19897 19926 19844 19513 19687 2645 3825 4592 5735 6557 6917 6871 7483 7406 7754 25917 25108 24243 23922 23092 22515 22213 21942 22036 21450 21464 21029 21553 20819 21272 20969 20928 20701 20961 20440 20759 20391 20768 20536 20649 20621 20525 20503 20480 20175 20544 20189 20708 20320 20715 20281 20455 20139 20345 20090 20509 20269 20507 20326 20601 20100 20504 20257 20346 19975 20463 20120 20531 20148 20636 20083 20571 19880 20497 20025 20669 20116 20753 20169 20640 20088 20408 19923 20487 19950 20685 20081 20762 20023 20768 20023 20592 20051 20522 19949 20563 20135 20685 20222 20664 20242 20616 20269 20657 20007 20530 20050 20761 20140 20809 19994 20829 19985 20698 20070 20550 20135 20631 20174 20775 20157 20647 20225 20566 20214 20686 20203 20767 20151 20652 20067 20736 20045 20932 19893 20818 19936 20870 20189 20928 20440 20737 20144 20875 20281 20523 20001 21060 20384 20869 20421 20776 19968 20648 20146 20713 20484 20269 20258 20659 20425 20792 20691 20848 20288 20814 20052 20860 20374 20761 20252 20640 20531 20797 20419 20807 20456 21029 20458 20736 20245 20490 20456 20814 20806 20881 20583 20695 20393 20645 20597 20534 20554 20839 20641 20921 20861 9544 10610 11473 11565 12233 12520 12836 12969 13211 25267 25431 24064 23713 22908 22531 22332 22150 21719 21875 21465 21815 21632 21811 21650 21475 21450 21472 21714 21126 21600 20860 21527 20871 21350 21092 21381 21101 21345 21249 21256 21096 20832 21017 21037 20979 21192 21073 21320 21083 21347 21071 21398 20917 21417 20809 21295 20663 21319 20753 21349 20883 21345 20953 21504 20939 21445 20996 21448 20981 21429 20944 21318 20820 21508 20921 21212 20711 21294 20776 21353 20704 21220 20800 21240 20803 21338 20731 21395 20809 21348 20761 21338 20779 21405 20727 21448 20679 21352 20752 21289 20688 21522 20342 21377 20920 21455 20950 21559 21001 21573 20996 21653 20954 21697 20837 21505 20764 21428 20720 21824 20923 21396 20886 21347 20928 21399 21143 21312 20979 21522 20780 21675 20839 21446 20850 21529 20845 21580 20814 21553 21156 21268 20717 21694 20854 21437 20842 21614 21191 21494 21079 21499 21041 21413 21396 20958 20663 22151 20813 21510 21001 21671 21304 21301 21030 21537 21060 21447 21098 21136 20996 21583 21021 21397 21001 21726 21475 21516 21047 21481 21150 21824 21177 21504 21275 21760 21072 21335 21342 21627 21594 15520 15754 16725 16952 17418 17428 17765 17626 18208 17762 23821 23367 23096 22135 22371 22424 22302 21762 22022 21958 21918 21685 21805 21728 21839 21557 21703 21716 21813 21807 21698 21642 21707 21585 21686 22392 21218 21645 21687 21968 21281 21670 21561 21913 21319 21610 21553 21779 21538 21548 21653 21752 21624 21730 21617 21703 21431 21529 21605 21895 21333 21909 21449 21961 21442 21717 21405 21904 21383 21908 21620 21925 21325 21728 21453 21981 21354 21929 21430 21961 21250 21859 21509 21958 21354 21845 21515 21926 21324 21948 21414 21927 21296 21916 21491 21991 21175 22128 21426 21978 21313 22148 21421 21831 21451 22058 21353 21770 21467 22099 21373 21925 21633 22017 21509 22094 21555 21928 21424 22119 21330 21848 21399 22166 21326 21991 21449 22163 21553 21859 21440 21927 21397 22005 21460 21958 21767 22136 21480 21998 21394 22151 21161 21966 21368 21840 21313 22206 21600 21925 21349 22045 21719 22240 21456 21485 21911 22151 21781 21864 21536 21998 21409 21969 21625 22237 21544 21957 21443 21813 21968 22200 21649 22106 21603 22067 21463 21958 21461 21861 21591 21995 21456 22052 21737 21907 21639 22128 21687 21763 21716 22069 21835 21901 21823 21880 21536 22144 21575 21787 21769 21979 21864 21904 22099 21659 21735 22153 21816 21785 21951 21911 21740 21939 21936 22055 21676 22348 21607 21975 21934 21889 21604 22064 21898 21934 21884 21478 22268 21784 22209 21691 22377 21715 22123 21805 22268 21720 22309 21843 22165 21885 22186 21913 21877 21915 22133 21804 22084 21821 22240 21745 22323 21760 22114 21911 22250 21648 22215 22023 21984 21870 22282 21835 22136 21885 22299 21619 22394 21794 22180 21812 22421 21715 22237 21945 22192 21760 22417 21794 22224 21882 22385 21617 22408 21817 22198 21722 22509 21600 22377 21774 22400 21732 22434 21790 22228 21808 22418 21736 22278 21900 22407 21633 22366 21856 22304 21831 22515 21634 22377 21709 22411 21753 22278 21843 22324 21700 22371 21673 22325 21783 22455 21878 22338 21814 22161 21618 22369 21754 22224 21651 22488 21400 22604 21779 22521 21968 22312 22081 22467 21543 22477 21799 22096 21708 22505 21592 22304 21905 22166 21721 22014 21918 22332 21889 22401 21786 22266 22264 22535 21920 22357 21861 22129 21832 21878 21819 22224 21989 22347 22067 22567 22048 22004 22101 22327 22262 22229 22103 22471 21916 22227 22300 22099 21879 22328 21976 22218 22113 22208 21901 22358 22188 22227 22274 22388 22130 22119 22186 22258 22225 22184 22146 22359 22293 22279 22256 22213 22154 93 82 75 79 93 71 73 551 855 1764 30519 30214 28882 28376 27475 26979 26455 25917 25506 25344 24961 25018 24562 24924 24249 24603 23928 1686 2965 4446 5159 5880 6300 7001 6965 7662 29479 31561 29706 29311 27820 27778 26504 26743 25735 26041 25190 25543 24728 25198 24324 24949 24006 24699 6927 9082 9095 10933 10823 11880 11705 12455 12235 31160 29504 29043 27245 27401 26135 26292 25472 25488 25012 25325 24539 24896 24101 24841 24009 24576 12882 13376 13543 14874 14884 15895 15704 16415 16069 16852 28515 28010 26596 26352 25078 25494 24715 24898 24241 24839 23780 24461 23552 24239 23555 24043 23302 18324 17900 19142 18955 19628 19232 19332 19463 20179 19254 25801 24662 24409 24746 24338 23958 24148 23617 23887 23633 23958 23296 23319 23465 23549 23049 23555 22860 23488 23037 23475 23477 23440 23360 23400 23140 23360 23042 23147 23049 23140 22752 23447 22970 23340 22887 23144 23033 22861 23047 23059 22692 23132 23000 23514 22813 22992 22807 22849 23117 23041 22930 23133 23056 23387 22919 23169 22744 22730 22736 22772 22851 22955 22885 22679 23089 22849 23256 22494 23054 22629 23162 22927 23252 23013 23099 22560 23121 22826 23016 22903 22889 22878 23088 22580 23259 22575 23009 22835 22949 22740 23023 22550 23057 22704 22992 22822 22684 22598 23260 22542 23133 22821 22952 22672 23211 22435 23176 22665 23028 22611 23210 22405 23233 22600 23064 22567 23271 22322 23200 22582 23110 22591 23223 22347 23069 22656 23121 22544 23157 22642 23015 22614 23201 22375 23219 22614 23165 22528 23171 22443 23184 22480 23048 22583 23201 22532 23055 22491 23094 22383 23072 22712 23072 22419 23008 22416 22997 22449 23157 22355 23249 22407 22648 22828 23148 22562 22937 22279 22951 22300 23226 22722 23258 22189 22481 22412 23161 22258 23044 22514 22737 22694 22764 22669 22688 22535 23080 22612 23147 22448 22971 22439 23128 22937 22751 22727 23118 22656 22715 22824 22858 22679 22861 23035 22852 22887 23097 22852 22758 22656 22977 22711 22576 22682 23251 22465 22887 22598 23083 22663 22700 22869 22943 22540 22679 23012 22924 22726 22903 22820 22885 22617 22662 23252 22669 22897 22512 23002 22727 22969 22425 23034 22762 23244 22531 23197 22758 23048 22866 22905 22853 22884 22829 23156 22752 22980 22660 23159 22749 23071 22582 23120 22741 23342 22515 23071 22832 23107 22567 23130 22729 23064 22746 23063 22680 23181 22599 22953 22654 23139 22711 22951 22563 23200 22705 23243 22523 23168 22748 23153 22440 23164 22646 23160 22551 23136 22639 23212 22392 23104 22629 23232 22549 22963 22675 23245 22636 23015 22616 23245 22697 23173 22589 23362 22648 23225 22464 23124 22488 23119 22519 23168 22612 23056 22551 23037 22725 23077 22589 23029 22628 23152 22558 23121 22460 23360 22786 23144 22228 23364 22419 23136 22480 23152 22392 23163 22022 22827 22705 23335 22568 23057 22940 23274 22816 23185 22255 22959 22493 23311 22528 22801 22740 23271 22743 23017 22472 23065 22561 23299 22606 23022 22369 23280 22487 22992 22845 22938 22657 22855 22702 23000 22519 23116 23028 23090 22804 22829 90 72 77 741 1079 2044 2247 2565 2855 32496 32396 31121 29696 28838 28053 4953 6295 7205 7732 8490 8774 9404 9635 9865 31184 32983 31787 30861 29398 28919 10606 11407 12444 13103 13657 14216 14771 14579 14542 14823 32408 30834 30301 28816 28663 17616 16134 16610 17473 17682 18117 18124 18144 18179 18669 30366 29479 28197 28028 26944 27028 20454 21213 21072 21579 21227 21738 21211 21433 21201 27244 26826 26804 26018 26112 25662 25644 25015 25666 24960 25431 24670 25033 24473 24943 24495 25037 24336 24750 24051 24584 24086 24664 24089 24614 23970 24480 23598 24231 23684 24333 23700 24455 23721 24394 23763 24186 23684 24336 23705 24004 23458 23989 23597 24151 23553 24155 23635 24144 23399 24069 23394 23872 23317 23866 23408 24036 23319 23970 23221 23782 23209 23671 23321 23848 23430 23928 23327 23726 23238 23831 23003 23923 23085 23895 22972 23888 23121 23503 22967 23352 23016 23819 23785 23503 23244 23721 23180 23936 23712 23882 23165 23694 23239 23849 23444 23565 23603 23597 23139 23639 22928 23424 23084 23703 23501 23642 23175 23427 23425 23636 23014 23484 22893 23510 
