# Supplementary material for: An Active Feature Selection Strategy for DWT in Artificial Taste
Source: Hindawi journal article supplement (doi:10.1155/2018/9709505), 2018-01-01
Supplement: f1 [file 9709505.f1.zip › beer-med-2.txt]

43488 36120 33145 31723 55 5050 12561 16814 17849 19495 19126 19957 19721 20391 20432 20566 20597 20762 20789 20901 21114 21211 20995 21359 21200 21399 21059 21571 21161 21462 21179 21724 21228 21446 21326 21669 21328 21773 21279 21767 21324 21772 21378 21868 21381 21784 21447 21687 21452 21895 21603 21965 21307 21914 21416 21879 21478 21792 21535 21968 21355 22039 21287 22053 21474 22212 21544 21948 21458 22096 21493 22107 21414 22080 21517 21808 21562 21877 21636 21985 21398 22148 21454 22035 21596 21855 21594 22056 21235 22056 21483 21946 21541 21824 21661 22104 21460 22025 21549 21917 21543 22034 21385 22104 21414 21990 21605 21985 21577 22204 21584 22184 21909 21997 21555 21918 21543 21965 22000 21847 21452 22080 21384 21997 21479 22144 21387 21958 21676 22040 21496 21988 21585 21902 21656 21941 21640 21984 21369 22103 21764 21980 21614 22051 21551 21998 21696 21940 22130 21838 21582 22050 21877 21938 21833 21942 21558 22074 21648 21795 21975 21751 21577 22049 21590 21773 22011 21672 21686 22228 21643 21832 22023 21712 21806 22140 21936 21795 21824 21949 21885 21869 21382 21564 11654 16172 18509 18810 19404 19543 20052 19735 20445 20338 27252 24161 23368 22971 22720 22365 22097 22104 22223 21975 22216 21754 22170 22009 22184 21721 22314 21667 22219 21810 22096 21706 22244 21654 22129 21871 22086 21804 22156 21594 22235 21744 22038 21812 22168 21454 22247 21591 22161 21737 22122 21641 22321 21507 22274 21667 22099 21678 22277 21479 22238 21718 21939 21788 22096 21642 22256 21671 21937 21755 22176 21092 22273 21604 22140 21591 22208 21504 22113 21664 22153 21512 22155 21765 22221 21568 22168 21629 22093 21736 22162 21560 22113 21656 22048 21477 22240 21513 22325 21474 22124 21657 21656 22144 21769 21399 21645 21496 22068 21559 21725 21767 21988 21640 21895 21848 21845 21800 22052 21680 22131 21397 22107 21595 21751 21656 22010 21894 22054 21792 21879 21864 21677 21753 22130 21761 21866 22061 21817 21827 22236 21564 21994 22066 22008 21678 22169 21844 21901 22069 21861 21858 21936 21851 22016 21828 21834 21782 21799 21793 22146 21702 21712 22230 21780 22077 21623 21782 21899 22112 21618 22048 21771 22071 21860 21996 21869 22039 21622 22019 21889 21840 21872 22184 21568 22152 21704 22008 21713 22119 21396 22103 18040 20212 20364 20944 20947 21560 20833 21732 21291 28544 23937 23310 22163 22816 21960 22428 21928 22200 21854 22392 21682 22403 21707 22064 21696 22162 21638 22310 21568 22282 21671 22304 21745 22071 21680 22229 21514 22274 21591 22272 21655 22060 21544 22094 21589 22213 21576 22171 21576 22020 21593 21880 22016 22134 21740 22200 21589 22056 21590 22020 21952 22165 21562 21959 21572 21979 21602 21772 21704 21896 21860 22262 21944 21984 21863 22229 21494 22116 21664 22204 21649 22122 21584 22113 21960 21883 21669 22016 21585 21980 21676 22008 22004 21963 21728 21997 21746 21880 21659 22132 21719 22150 21776 21958 21844 21932 22022 21901 21770 22000 21656 22221 21841 22023 21863 21765 22107 21760 21853 21815 21670 22048 21761 22060 21846 21921 21875 21687 21987 21589 22291 21847 22247 21661 22016 21824 21842 21853 21767 21927 22034 21764 22132 21932 22105 21814 22024 21785 22032 21597 22230 21700 22240 21664 22265 21623 22256 21493 22149 21445 22251 21721 22192 21613 22152 21655 22115 21685 22153 21720 22192 21654 22144 21675 22145 21612 22212 21659 22183 21682 22176 21725 22146 21721 22123 21776 22100 21737 22112 21710 22119 17711 20649 20661 21518 21032 21705 21258 21815 21344 21907 23864 23022 22018 22488 21951 22517 21676 22416 21876 22081 21668 22296 21888 22277 21912 22297 21860 22136 21521 22311 21588 21622 21716 22119 21597 22096 21689 22131 21611 22294 21306 22238 21330 21920 21917 22006 21353 22124 21553 21932 21786 22062 21751 21991 21638 21952 21696 22063 21824 21762 21825 21891 21832 21943 21928 21777 21868 21766 22053 21824 22068 21769 22053 21884 22198 21778 21985 21920 22117 21812 22006 21607 21432 21808 22211 21444 22249 21670 22064 21621 22147 21725 22193 21733 22055 21653 21976 21689 22028 21710 22153 21746 22161 21762 22103 21693 22042 21896 22042 21824 22208 21735 22038 21824 22103 21752 22061 21776 22092 21802 22036 21725 21965 21736 22016 21717 22041 21687 22052 21672 22144 21692 22035 21742 22058 21742 22003 21773 22025 21781 22092 21783 22148 21651 22180 21544 22209 21531 22216 21669 22226 21818 22128 21681 22246 21560 22184 21658 22154 21530 22121 21496 22057 21610 22132 21780 22402 21137 21771 21997 22136 21428 22224 21993 22070 22006 22024 21382 22103 21504 22080 21768 22168 21670 21814 21517 22240 21591 22017 21920 21976 21623 20928 20993 21286 21150 21769 21472 22010 21434 21699 24292 22448 22276 22016 21902 21911 21938 21959 21785 21799 21700 21961 21882 21826 21901 21895 21856 21928 21792 21861 21924 21788 21911 21728 21735 22221 22100 21708 22184 21691 22112 21880 22025 21836 21937 21967 22016 21904 21865 21960 21954 21778 21988 21913 21977 21835 22129 21822 22146 21847 22013 21692 22070 21808 22056 21664 22109 21741 22093 21664 22160 21703 22107 21705 22185 21639 22199 21687 22221 21664 22176 21623 22220 21572 22208 21609 22232 21621 22181 21628 22199 21614 22157 21620 22214 21505 22203 21505 22232 21569 22301 21560 22179 21522 22142 21593 22068 21506 22176 21797 22141 21880 22064 21752 22112 21616 22119 21616 22155 21568 22206 21550 22156 21735 22240 21568 22165 21478 22238 22016 21950 21660 21897 21460 21783 22028 21985 21641 22116 21560 22099 21628 22130 21700 22129 21639 22136 21681 22160 21804 22125 21729 22135 21742 22193 21524 22221 21745 22165 21602 22189 21760 22142 21792 22127 21826 22147 21862 22177 21769 22047 21828 22024 21797 22061 21661 22093 21879 21981 21825 21992 21826 21832 21696 21383 22291 21541 22057 21815 22294 21694 22153 20709 21778 21574 21901 21725 21896 21703 21969 21858 21978 22328 22260 21931 22070 21863 21966 21738 22063 21744 21976 21843 21860 21672 21549 21741 22147 21620 22132 21681 22222 21650 22190 21620 22233 21614 22236 21524 22274 21548 22224 21440 22300 21607 22274 21629 22180 21740 22108 21781 22048 21794 22055 21752 22144 21699 22209 21572 22268 21995 22145 21552 22087 21654 22088 21478 22136 21563 21984 21648 22137 21664 22120 21617 22104 21550 22200 21868 22032 21431 22263 21616 22281 21931 21921 21625 22101 21624 21632 21734 22304 21731 22144 21760 22057 21908 22066 21879 21926 21780 22045 21684 22024 21692 21937 21564 21968 21817 21988 21804 21925 21798 21760 21586 21848 21912 21825 21692 22120 21829 21925 21911 21936 21774 21716 22157 21932 21670 22020 22074 21794 21795 21984 21745 21831 21793 21943 21628 21657 22128 21854 21940 22032 21946 21754 21706 22097 22309 21774 21966 21934 22251 21564 22216 21840 21936 21707 22049 21666 22023 21890 22366 21622 22088 21893 21847 21804 22043 21607 22188 21863 22116 21652 22246 21714 22012 21797 22080 21673 22212 21776 21977 21673 22280 21568 22188 21849 21948 21551 22232 21632 22113 21739 22166 21547 22234 21666 22080 21675 22272 21456 22256 21627 21967 21710 22279 21485 22224 21772 22372 21692 22310 21516 22164 21710 22128 21664 22288 21440 22231 21508 22008 21658 22105 21508 22132 21504 22158 21710 22026 21559 22071 21464 22157 21556 22167 21665 22007 21741 22066 22023 22211 21450 21790 21478 22253 22061 22046 21452 21969 21665 21943 21768 21479 21742 22133 21589 22146 21662 21716 21824 22058 21619 21974 21735 22043 21748 22152 21528 22098 21656 21864 21804 22053 21547 21940 21664 22172 21766 21973 22023 21890 21441 22144 21617 21598 22064 21926 21751 21930 21733 21902 21879 21862 21930 21921 22048 22003 21980 21816 22016 21875 21794 21924 22071 21808 22212 21779 22132 21644 21895 21846 22231 21674 21954 21757 21869 21869 21828 21760 22002 21616 22145 21623 21987 21767 22162 21669 22295 21519 22178 21742 22012 21801 22018 21634 22236 21613 22172 21736 21987 21739 22198 21556 22134 21632 22069 21771 22061 21672 22225 21401 22233 21648 22062 21624 22186 21575 22289 21335 22196 21678 22101 21738 22122 21604 22213 21652 22171 21719 22020 21719 22185 21644 22288 21488 22156 21504 22175 21586 22039 21749 22140 21559 22093 21569 21985 21554 22110 21751 22000 21584 22130 21491 22087 21845 21942 21723 22000 21500 22201 21548 22215 21665 21867 21600 22056 21609 22144 21513 22074 16357 19378 20073 20544 20551 20770 20795 21300 20776 36448 24971 23675 22947 22887 22186 22592 22016 22396 21965 22209 21988 21835 22182 22041 21826 22130 21678 18717 20225 20754 21429 21418 21627 21427 21401 21505 28398 24197 22816 22664 22335 22242 22393 21941 22003 22098 22372 21844 22375 21896 22368 21786 22046 11863 19899 21024 21475 21320 21893 21446 21792 21313 21975 25088 23272 22381 22330 22069 22468 21792 22423 21721 22220 21852 22036 21879 22116 21794 22214 21600 18944 20476 21703 21395 21817 21532 21895 21524 22156 21421 23808 22168 22517 21968 22119 21876 22224 21720 22341 21628 22232 21790 22092 21719 22221 21607 22320 20407 21796 21405 21975 21479 22028 21664 21815 21432 22209 22231 22282 21818 22203 21688 22112 21797 21943 21630 21959 21610 22140 21729 22188 22365 22289 21700 21728 21852 22080 22039 21945 21618 21868 21649 22240 21829 22201 21538 22122 21692 21987 21930 21888 21537 22213 21871 21895 21881 21827 21693 21915 21817 21850 21716 21955 21632 21830 22208 21916 21585 22136 22033 21753 21874 22081 21785 21760 22016 21793 21978 21923 22119 21956 22151 21650 22379 21355 22011 21927 22212 21767 22052 21969 22053 21633 21982 21826 22048 21501 22215 21778 22123 21591 22107 21697 22203 21682 22046 21673 22241 21600 21975 21735 22237 21632 22063 21712 22282 21608 22066 21638 22293 21627 22064 21520 22242 21737 22176 21462 22141 21768 22196 21815 22104 21714 22339 21569 22043 21608 22081 21782 21936 21806 22126 21912 21975 21648 22167 21612 22043 21892 22028 21869 22312 22071 22176 21424 22311 21808 22112 21761 22238 21697 22233 21690 22041 21864 22117 21645 22055 21309 22023 21899 22179 21696 22053 21769 22088 21801 21730 21766 21814 22004 22088 21718 21664 21969 22285 21893 21913 21747 22100 22022 21788 21646 21851 22007 21875 21870 21821 21812 22087 22119 22266 21873 21728 22290 21904 22007 21504 22092 21807 22076 21966 22073 21923 22173 21752 21916 21740 22125 21721 21992 21684 22123 21705 22063 21621 22163 21723 22118 21575 22103 21775 22252 21408 22099 21688 22272 21576 22119 21623 22344 21593 22071 21649 22220 21660 22080 21638 22223 21747 21964 21591 22297 21657 22348 21605 22249 21584 22085 21540 22292 21539 22032 21508 22198 21568 22075 21469 22230 21661 22062 21508 22128 21523 21767 21400 22185 22055 22123 21678 22224 21621 22016 21580 22141 21712 22072 21696 22087 21543 21941 21456 22082 21708 21856 21704 22057 21868 21858 21937 22377 21879 21866 21761 21988 21848 21883 21529 21975 21906 22016 22096 21927 22057 21800 21476 21877 21963 21932 21720 21895 22464 22260 21975 21451 22273 21693 22212 21794 22136 21910 22131 21540 21964 21988 22090 21613 22067 21756 22227 21627 22022 21636 22199 21840 22060 21700 22069 21862 22148 21574 22227 21728 22184 21490 22196 21671 22225 21716 22140 21662 22256 21634 22060 21597 22252 21681 22433 21559 22163 21762 22105 21548 22053 21722 22266 21613 22039 21670 22253 21568 22081 21575 22076 21760 22092 21661 21793 21672 22180 21504 22024 21488 22272 21522 21927 21163 22282 21796 22176 21415 21903 21551 22147 21383 9143 18563 20109 20533 20947 20864 21331 20967 21504 21139 27490 24168 23288 22448 22392 22108 19057 20608 21205 21000 21451 21744 21746 21378 21521 28792 24264 22951 22465 22255 22049 19011 20820 21088 21560 21520 21934 21705 21530 21732 21843 24109 22796 22188 21933 21752 18399 21184 21346 21766 21353 22036 21692 22101 22044 21888 23337 22641 22421 22241 21824 22293 21312 21998 21672 22230 21505 22140 21685 22105 21703 23338 22071 22502 21960 22324 21565 22179 21830 22349 21768 21920 21583 22317 21772 22320 21848 22164 21652 22323 21735 21664 21573 22178 21743 22234 21661 22000 21672 22293 21746 22252 21572 22265 21660 22113 21752 22104 21632 22189 21799 22199 21792 22085 21832 22327 21561 22059 21573 22331 21580 22024 21431 22170 21368 22130 21680 22153 21553 22129 21482 22160 21688 22100 21760 21981 21746 22000 21612 21985 21481 22038 21703 21978 21820 21762 21696 22134 21960 21847 21511 22046 22026 21950 21765 21612 21641 22089 22073 21845 21756 21804 21967 22055 21872 21647 21539 21724 21816 21943 21810 21702 22021 21812 22304 21710 22140 21527 21931 21816 22177 22020 22243 21677 22144 
21352 22005 21931 22244 21461 22215 21891 21991 21521 21955 21644 22043 21417 21947 21588 21985 21456 21891 21787 22186 21836 21975 21711 21837 21512 21687 21388 21610 21479 21889 21601 22203 21866 21624 21357 21517 21578 22106 16950 17430 17176 17776 17240 18054 17459 17953 17783 18311 17971 18553 18188 18552 18348 18879 18432 18844 18418 19250 19000 18930 18838 18963 19093 19415 18897 19301 19310 19459 19654 19369 19277 19618 19541 20029 19797 19813 19543 19696 20127 19827 19869 19849 19863 20187 19665 19928 20045 20071 20126 20151 20117 20436 20144 20350 20672 20317 20621 20647 20971 20437 20374 20509 20773 20098 20998 20291 21017 20670 20544 20448 20809 20243 21038 20847 20760 20664 20902 20660 21060 20569 21149 20592 20975 20704 21160 20432 21280 20899 20961 20677 21265 20525 21203 20649 21255 20720 21344 20570 21445 20718 21235 20838 21416 20893 21522 20636 21408 20861 21306 20859 21572 20656 21576 20820 21423 20743 21593 20640 21563 20923 21344 20975 21538 20795 21626 20903 21398 21051 21530 20804 21636 20880 21837 21028 21610 20779 21639 20879 21573 20882 21605 21124 21623 20840 58 57 60 0 55 217 2492 2892 4962 4595 30978 25940 24836 22801 23303 21864 21810 21214 22071 21801 21682 20852 22060 20936 21559 20924 21366 20947 21619 20929 21649 21018 21361 21028 21557 20903 21586 21250 21682 20840 21513 20961 21494 21027 21304 21017 21205 21104 21605 21027 21633 21408 21280 21585 21756 21368 21400 21447 21315 21336 21756 21378 21411 21504 21399 21175 21659 21101 21614 21317 21588 21324 21617 21082 21679 21257 21345 21592 21405 21406 21537 21290 21139 21627 20635 21607 21255 21797 21453 21876 21385 21618 21385 21496 21429 21618 21376 21833 21447 21640 21430 21868 21232 21811 21417 21661 21414 22008 21255 21849 21268 21688 21400 21838 21102 22007 21418 21689 21445 21897 21315 21864 21186 21963 21301 21707 21337 21940 21182 21951 21308 21802 21261 21975 21094 22048 21212 21912 21273 21943 21362 22062 21187 21872 21403 21825 21257 21949 21197 21899 21373 21798 21311 22048 21098 21982 21285 21856 21132 21914 21187 21888 21201 21864 21261 21849 21235 22006 21219 21853 21120 21894 21303 21860 21002 21870 21157 21953 21042 21889 21025 21340 21480 21632 21550 21997 21096 22090 21214 21795 21172 68 5835 9391 10153 12032 12302 13197 13340 14208 13858 35600 28061 25618 24147 23628 22699 22709 21968 22425 22139 21984 21702 21906 21600 21820 21720 21688 21829 21477 21435 22011 21415 21852 21426 21460 21718 21655 21413 21844 21436 22048 21505 21501 21633 21700 21652 21779 21721 21629 21683 21632 22379 21453 21635 21611 21641 21226 21673 21367 21743 21667 21640 21603 21732 21507 21632 21584 21708 21655 21724 21465 21649 21337 21960 21479 21966 21252 21932 21367 21899 21444 21973 21426 21889 21431 21914 21392 22007 21287 22087 21284 22046 21308 21811 21420 21840 21323 21968 21200 22153 21184 22112 21257 21968 21387 21888 21363 21976 21293 22097 21255 21989 21359 21949 21404 21858 21440 22059 21255 22135 21271 21956 21220 21962 21315 21971 21271 21849 21312 21685 21280 21808 21306 21930 21127 21841 21312 21911 21138 21992 20936 21929 21472 21341 21060 21960 21335 21955 21831 21578 21432 21849 21465 21982 21673 21884 21304 21866 21308 21691 21312 21701 21322 21797 21265 21841 21443 21799 21527 21824 21379 21762 21530 21641 21779 21856 21805 21551 21836 21481 21901 21673 21888 21767 21933 21509 21850 21713 21761 21470 21858 21535 9739 14214 16057 16855 17521 17640 18066 18278 18673 18487 28672 25037 24220 23052 22935 22231 22319 21746 22301 22124 22017 21749 21916 21426 21959 21672 22101 21453 22151 21569 21970 21632 21973 21187 21925 21495 22080 21477 22025 21332 22109 21320 22092 21208 22044 21168 22086 21293 22151 21298 22084 21198 22165 21253 22166 21266 22154 21240 22188 21228 22116 21320 22121 21329 22052 21366 22036 21476 22051 21433 22054 21380 22074 21368 22011 21346 21880 21412 21884 21401 21698 21274 21788 21361 21822 21267 22066 21260 22041 21226 21974 21031 21701 20980 21889 21494 21734 21380 22178 21524 22087 21441 21968 21525 21977 21253 21989 21399 22046 21577 21986 21275 21751 21276 21790 21298 21960 21552 21803 21400 21874 21280 21907 21344 22054 21467 21856 21616 21792 21544 21828 21632 21705 21540 21619 21481 21591 21445 21622 21777 21757 21692 21538 21887 21579 21996 21615 21997 21578 21743 21472 22007 21620 22673 21414 22190 21571 21783 21403 21875 21267 21821 21233 21879 21581 21829 21584 22024 21516 22017 21305 21975 21303 22048 21341 22148 21283 22127 21529 22106 21279 22083 21370 22139 21266 22062 21314 22153 21384 22111 21408 8752 16602 19105 19088 20279 19687 20724 19991 21008 20145 29048 24018 23628 22188 22700 21702 22380 21537 22289 21446 22215 21384 22215 21357 22221 21303 22236 21349 22037 21466 21999 21531 21914 21517 21921 21468 21959 21402 22033 21520 22002 21448 21717 21360 22069 21372 21632 21379 22094 21228 21425 21859 21895 21354 21828 22011 21721 21248 21847 21342 21926 21702 21867 21634 21943 21613 21490 21603 21990 21355 21883 21548 21898 21728 21644 21705 21898 21924 21424 21767 21702 21687 21588 21779 21667 21719 21948 21837 21840 21920 21881 21727 21606 21677 21704 21880 21655 21667 21437 21575 21527 21623 21748 21659 21908 21525 21678 21691 22152 22333 21241 22086 21449 22249 21640 22018 21693 21885 21687 21833 21744 21900 21721 21650 21638 21846 21601 21824 21527 22061 21525 21984 21517 21913 21580 21891 21460 22073 21607 22134 21372 22107 21468 22077 21627 22123 21357 22093 21488 22095 21468 22144 21271 22163 21445 22169 21154 22179 21330 22151 21399 22135 21481 22183 21424 22132 21447 22087 21424 22064 21394 22048 21378 22098 21298 22093 21277 22123 21250 22075 21321 21990 21676 22123 21464 21819 21404 21890 21277 21792 21287 22084 18581 20687 20878 21270 20851 21691 20918 21536 20985 28856 23185 22721 21892 21553 21673 21960 21394 22112 21557 22016 21479 21993 21424 21992 21507 21991 21415 21997 21862 22092 21344 21748 21388 21742 21632 21923 21606 21575 21696 21606 21530 21669 21831 21833 22006 21518 21927 21508 21688 21855 21625 21678 21689 21848 21641 22162 21414 21720 21885 21800 21737 21701 21559 21798 21789 21322 21537 21680 21649 21095 22152 21379 21728 21339 21979 21379 21808 21561 22187 21317 21875 21927 22046 21536 21778 21767 22173 21585 21796 21591 22093 21203 21958 21658 21992 21657 22056 21648 22024 21351 21964 21609 22042 21347 22122 21609 22016 21443 22156 21525 21962 21467 22176 21485 21991 21477 22199 21508 22018 21415 22173 21222 22105 21512 22046 21316 22171 21496 21895 21393 22164 21519 21969 21520 22213 21387 22091 21479 22137 21383 22113 21287 21991 21476 21961 21413 22103 21325 21845 21504 22095 21304 21901 21241 22105 21895 22204 21318 22036 21353 21658 21089 21760 21372 21562 21208 22080 21094 22215 21271 22145 21373 21844 21475 21577 21287 22021 21552 21863 21387 21918 21289 22065 21586 21872 21476 21940 21560 21698 21554 21835 21447 21781 21754 21617 21854 21913 21479 22129 21639 21672 21946 21824 21785 21696 21712 21568 21826 21838 21450 21851 21671 21634 21652 21696 21623 21747 21762 21842 21926 21673 21501 22233 21607 21526 23124 21616 21698 21488 22391 21261 21977 21729 21756 21760 21849 21427 21854 21842 21745 21909 22092 21556 22139 21467 21897 21581 21987 21414 22016 21610 21985 21666 21947 21312 22028 21521 21984 21486 21563 21433 22237 21485 22001 21605 21835 21400 22188 21489 22115 21553 21995 21440 22183 21208 22188 21440 22030 21372 22176 21286 22173 21441 22010 21568 21533 21483 22153 21432 22104 21539 21947 21539 22191 21243 22231 21335 22119 21296 21863 21355 22049 21360 22170 21368 22080 21497 21783 21400 21989 21517 22181 21191 21873 21385 21612 21354 21977 20956 22112 21326 22045 22040 22097 21523 22113 21327 22072 21447 21880 21655 22023 21211 22024 21344 21997 21923 21984 21544 21979 21918 21861 21617 21973 21464 21783 21610 21997 21591 21788 21689 21504 21797 21892 21575 22210 21614 21789 21716 21751 21891 21641 21607 21973 21504 21763 21747 21720 21799 21607 21356 22037 21527 21724 21624 21543 21808 21556 21852 21875 21553 22123 22279 21112 21959 21749 21789 21724 21777 21688 22020 21388 22098 21563 21955 21933 21709 21556 22056 21504 22064 21509 21949 21534 21927 21651 22109 21584 21997 21322 1907 6659 8931 9943 11275 11328 12507 12256 13368 43473 32128 27621 25948 24282 24027 22800 23346 22266 22805 22016 22413 21783 22466 21635 22378 21464 65 8027 12900 14360 15671 15977 16993 16579 17728 16958 37585 28812 26733 24320 23987 22855 23101 22288 22670 21752 22392 21671 22282 21522 22185 21506 22196 3798 14032 16067 18121 17697 19248 18856 19441 19388 20140 31060 26790 24395 23605 22784 22969 22136 22336 22112 22368 22033 22162 21605 22145 21504 22190 21495 13094 17500 19368 19718 20566 20173 20792 20637 21084 20632 26611 24366 23056 22413 22296 22063 22288 21953 21857 21976 21706 21928 21861 21648 22176 21786 21853 18370 20163 20770 21121 20829 20970 22100 20889 21817 28246 24051 22543 22443 21907 22092 21874 22127 21930 21850 21755 21744 21691 22105 21560 22212 21582 22019 21656 22099 21534 22013 21400 22160 21523 22058 21600 22037 21421 22224 21926 22051 21552 22492 21389 22185 21488 21998 21544 22135 21285 22177 21478 22003 21437 22265 21308 22071 21595 21948 21417 22204 21488 21995 21393 22312 21066 22102 21417 21991 21392 22151 21328 21913 21456 22099 21527 22007 21369 22056 21271 21909 21171 21625 21609 21989 21979 22024 21421 21985 21530 21870 21182 21923 21464 21808 21510 21957 21807 21959 21403 21697 21378 22005 21490 22007 21645 21861 21781 21608 21895 21725 21481 21539 21776 21872 21524 21655 21561 22061 21719 21555 21607 21907 21605 21815 21701 21748 21874 21745 21549 21634 21872 21976 21559 20311 21712 21340 22396 21729 22016 21525 21948 21699 21991 21417 21824 21639 21900 21688 21760 21421 22099 21550 21975 21390 22016 21581 22187 21447 21900 21479 22098 21559 22078 21330 22016 21489 22193 21372 21959 21404 22250 21479 22249 21228 22113 21489 22153 21551 21960 21467 22181 21457 22003 21361 22099 21532 22107 21341 22169 21516 22130 21514 21828 21483 21901 21235 21848 21338 22120 21255 22026 21056 22112 21257 22033 21257 22036 22088 22007 21521 21959 21347 21936 21319 21891 21457 21835 21373 21863 21210 22028 21339 21917 21372 21859 21485 21845 21664 21829 21821 21722 22040 21739 21854 21721 21330 21536 21751 21742 21579 21496 21705 21921 21723 21568 21786 21945 21456 21080 21755 22024 21776 21750 21224 21815 21838 21389 21837 21444 22087 21398 21928 21768 22235 21547 21855 21565 21985 21610 21900 21521 22208 21409 21917 21574 21952 21601 21941 21492 22191 21308 21976 21546 22140 21433 21970 21454 22216 21123 22011 21402 22292 21340 22023 21373 22231 21383 22054 21397 22179 21500 22008 21373 22177 21488 22209 21266 22220 21247 22319 21286 22086 21380 22067 21299 22007 21430 22049 21169 22240 21392 21901 21199 22059 21277 21913 21221 21992 21559 21865 21576 21963 21714 22150 21422 21497 21581 21890 21412 21770 21466 21825 21873 21834 21401 21972 21723 21709 21605 22001 21653 21781 21338 21646 22070 21725 21500 21710 21714 22007 21412 21665 21696 21958 21815 21874 21436 21850 21975 21952 21736 21665 21685 22100 21665 21878 21621 21371 22068 21601 21937 21205 21869 21597 22036 21520 21905 21625 22025 21664 22022 21498 22110 21728 22110 21400 21979 57 6977 9731 11691 12191 13389 13464 14153 13965 14983 35863 29860 26132 25096 23714 23778 9803 14717 15786 17528 17289 18183 17616 18658 18133 37906 29064 26553 24493 24241 23085 11968 16081 18544 18856 20059 19655 20208 19847 20584 39229 28785 25011 24482 22904 23283 12602 18305 19399 20594 20016 21124 20476 21262 20480 21600 26588 24437 22974 23067 22023 15367 19160 21096 20964 21508 21019 21527 21272 21767 21204 25363 22824 22731 22054 22468 21900 22156 21799 22060 21775 22075 21704 21729 21700 22083 21815 21873 21523 21760 21998 22157 21576 21694 21285 21869 21959 22008 21741 21639 21696 22073 21760 21744 21904 21627 21930 21793 21827 20805 21984 21460 22229 21751 22139 21508 21741 21754 21992 21739 21920 21541 21880 21796 22216 21508 21981 21498 22157 21665 22084 21655 21861 21470 22137 21533 22115 21237 21939 21537 22163 21601 21938 21351 22160 21546 22202 21477 22053 21376 22206 21532 22233 21296 22033 21545 22194 21489 21911 21405 22166 21453 22212 21320 22077 21467 22080 21339 21964 21309 21824 21905 22067 21365 22053 21320 22320 21264 21940 21523 21829 21383 22029 21504 21559 
21952 21729 21893 21712 21865 21676 21952 21618 21926 21671 21779 21592 21779 21508 21760 21632 21783 21570 21768 21469 21801 21618 21850 21675 22008 21671 21976 21725 21929 21621 21808 21678 21906 21719 21991 21702 21896 21455 21968 21601 21907 21640 21845 21693 21937 21667 21891 21584 21827 21719 22017 21645 21704 21632 21845 21689 21893 21696 21936 21987 22135 21896 22037 21737 21824 21764 21888 21703 21831 21927 21697 21639 21875 21814 21811 20845 21185 20999 21236 21041 21195 20965 21302 20855 21417 20960 21294 20993 21269 20980 21330 21031 21337 21086 21429 21030 21353 21131 21340 21052 21484 21128 21399 21119 21421 21211 21506 21120 21376 20949 21421 21088 21504 20993 21575 21359 21489 21113 21703 21232 21504 21300 21605 21576 21541 21340 21637 21293 21504 21309 21424 21309 21564 21250 21347 21376 21554 21271 21652 21446 21543 21328 21595 21493 21496 21416 21622 21232 21398 21484 21457 21304 21648 21383 21464 21603 21489 21414 21770 21463 21563 21772 21465 21412 21829 21474 21484 21620 21725 21509 21801 21458 21523 21529 21559 21520 21638 21507 21671 21569 21423 21645 21527 21643 7838 9765 10549 12203 12613 13317 13657 14106 14411 30925 23441 22403 21984 21685 21479 21660 21513 21536 21440 21414 21458 21540 21170 21533 21470 21402 21332 21637 21306 21488 21497 21375 21456 21635 21373 21625 21415 21610 21456 21588 21344 21616 21433 21564 21459 21580 21403 21701 21334 21694 21465 21537 21484 21753 21386 21792 21421 21761 21483 21721 21562 21772 21476 21649 21506 21652 21463 21765 21464 21667 21507 21667 21418 21800 21416 21764 21488 21670 21442 21702 21433 21724 21461 21701 21395 21811 21424 21768 21464 21736 21371 21904 21504 21712 21552 21766 21500 21760 21473 21800 21292 21879 21690 21843 21666 21623 21701 21800 21435 21765 21561 21818 21632 21795 21842 21874 21648 21576 21712 21220 21488 21795 21521 21725 21384 21724 21644 21646 21728 21914 21411 21916 21657 21534 21475 21937 21442 21669 21678 21742 21504 21869 21491 21640 21606 21710 21554 21771 21508 21735 21593 21559 21757 21751 21465 21912 21513 21704 21745 21609 21513 21857 21832 21667 21907 21537 21872 21714 21800 21753 21703 21664 21809 21581 21714 21681 21530 21718 21833 21689 21840 21736 21751 21714 21807 21655 21888 21618 21837 21672 21671 11577 16172 16585 17361 17353 17710 17861 18240 17721 18469 24860 23090 22323 22113 21829 22053 21602 21876 21687 21860 21626 21863 21518 21858 21463 21810 21616 21738 21600 21870 21665 21877 21569 21769 21646 21659 21632 21805 21513 21872 21400 21913 21557 21793 21576 21700 21486 21775 21622 21855 21552 21861 21788 21832 21512 21760 21457 21783 21559 21801 21618 21781 21506 21764 21569 21549 21530 21523 21465 21765 21691 21815 21548 21916 21637 21632 21755 21808 21683 21792 21579 21826 21490 21888 21518 21760 21606 21768 21646 21764 21664 21613 21719 21863 21547 21845 21673 21840 21559 21877 21653 21617 21784 21671 21869 21656 21609 21877 21531 21857 21588 21596 21718 21706 21801 21696 21733 21655 21481 21911 21623 21849 21624 21616 21656 21704 21575 21735 21733 21709 21827 21645 21699 21742 21680 21719 21761 21742 21781 21749 21741 21740 21812 21659 21812 21535 21897 21527 21866 21451 21888 21584 21847 21703 21863 21681 21835 21687 21837 21664 21805 21700 21740 21717 21713 21658 21805 21693 21702 21698 21888 21705 21972 21660 21929 21639 21682 21632 21714 21710 21836 21696 21715 21713 22010 21685 21973 21698 22004 21652 21928 21658 18327 18983 19553 19554 20138 19904 20082 20056 20264 27537 23182 22251 22129 21829 21997 21617 21908 21605 21772 21414 21832 21572 21741 21547 21696 21383 21751 21654 21922 21825 21723 21648 21849 21665 21819 21491 21747 21731 21853 21568 21691 21665 21825 21564 21837 21625 21792 21719 21793 21659 21696 21597 21895 21543 21896 21524 21860 21635 21970 21623 21984 21501 22033 21583 21971 21632 21885 21803 21833 21539 21913 21609 21780 21576 21737 21568 21728 21704 21766 21698 21713 21700 21481 21868 21661 21865 21552 21888 21632 21797 21671 21777 21620 21892 21644 21799 21751 21862 21480 21870 21638 21873 21587 21881 21606 21882 21675 21911 21543 21856 21613 22003 21616 21881 21637 21902 21635 21906 21649 21961 21641 21895 21660 21911 21674 21895 21637 21893 21641 21896 21611 21895 21657 21891 21686 21856 21686 21833 21681 21859 21687 21904 21680 22065 21651 22040 21617 21642 21619 21785 21609 21739 21573 21667 21680 21702 21653 21879 21596 21832 21581 21979 21367 21865 21576 21742 21641 21869 21557 21799 21600 21868 21520 21814 21560 21836 21449 21953 21626 21844 21616 21872 21572 22029 21575 22028 21513 21909 21633 21901 21573 18291 20245 20860 20832 21134 20973 21325 21157 21479 21094 23520 22150 22289 21710 22097 21719 21989 21628 21906 21550 21924 21527 22084 21569 22096 21543 22070 21664 21928 21681 21967 21722 21841 21668 21320 21978 21692 21861 21662 21921 21715 21944 21774 21523 21815 21581 21850 22017 21788 21918 21693 21815 21741 21828 21751 21872 21777 21792 21705 21766 21747 21784 21764 21830 21732 21808 21761 22064 21771 22135 21756 21811 21715 21856 21745 21705 21729 21777 21684 21689 21700 21717 21641 21868 21697 21748 21739 21817 21680 21754 21751 21760 21752 21806 21731 21846 21761 21889 21716 21953 21617 21969 21580 21965 21554 22007 21594 21879 21742 22023 21709 21900 21924 21918 21798 21902 21509 21975 21547 21969 21525 21863 21616 21607 22010 21943 21984 21990 21920 21863 21506 21772 21836 21831 21643 21841 21682 21639 21659 21848 21533 21857 21607 21796 21653 21696 21733 21835 21782 21743 21696 21581 21904 21645 21679 21719 21699 21657 21598 21718 21692 21744 21650 21744 21687 21728 21792 21815 21745 21639 21716 21864 21934 21829 21888 21748 21886 21819 21921 21697 21968 21621 21722 21824 21767 21687 21920 21749 21788 21785 21799 21754 20904 21492 21509 21648 21368 21687 21127 21703 21634 23570 22245 21934 21912 21690 21918 21677 21895 21657 21901 21696 21959 21660 21943 21560 21963 21707 21912 21532 21969 21752 21930 21629 21952 21613 21925 21629 21896 21654 21880 21695 21842 21708 21757 21703 21993 21701 21890 21725 21908 21709 21938 21632 21979 21580 21991 21396 21982 21659 21817 21698 21963 21662 21951 21632 21905 21594 21885 21578 21896 21602 21841 21632 21847 21589 21926 21605 21915 21491 21915 21590 21911 21470 22009 21533 21964 21680 21908 21929 21627 21622 21857 21984 21995 21767 21891 21847 21888 21575 21952 21607 21814 21606 21956 21661 21969 21857 21861 21704 21770 21736 21924 21636 21797 21814 21954 21476 21888 21681 21776 21609 21966 21597 21863 21693 21841 21705 21632 21955 21681 21687 21728 21856 21901 21800 22028 21573 21730 21699 21927 21596 21703 21981 21759 21806 21943 21928 21735 21726 21717 21910 21560 21829 21867 21778 21716 21897 21718 21765 21820 21799 21593 21878 21805 21719 21701 21892 21673 21870 21783 21829 21587 21907 21755 21789 21771 21991 21424 21898 21779 21882 21635 21925 21706 21815 21733 21891 21586 21918 21731 21774 21728 22001 21529 21970 21712 22197 21651 21996 21622 21922 21696 21891 21669 21980 21675 21846 21737 21960 21583 21976 21661 21782 21712 21906 21568 21953 21568 21868 21667 21894 21654 21865 21637 21936 21613 21719 21694 21916 21750 21960 21520 21905 21621 21928 21624 22114 21573 21985 21447 21856 21497 22004 21605 21788 21686 21894 21538 21928 21674 21900 21779 21907 21513 21842 21659 21904 21621 21763 21635 21863 21665 21885 21649 21865 21593 21949 21680 21888 21658 21796 21697 21892 21591 21926 21699 21638 21829 21703 21746 22065 21688 21643 21843 21728 21777 21792 21625 21936 21716 21646 22000 21674 21549 21985 21718 21760 21905 21700 21799 21801 21799 21966 21677 21616 22016 21766 21870 21721 21892 21655 21957 21784 21941 21809 21836 21784 21829 21687 21844 21819 21851 21768 21715 21728 21843 21604 21897 21653 21869 21788 21282 21776 21906 21666 21944 21749 21821 21749 21894 21639 21943 21658 21847 21751 21737 21726 21922 21605 21970 21653 21931 21707 21879 21678 22002 21522 21984 21703 21872 21743 21884 21654 21959 21607 21997 21705 21848 21709 21874 21696 22016 21499 22010 21572 21976 21664 21843 21707 21847 21647 21900 21853 21941 21863 21737 21705 21950 21593 21901 21769 22039 21591 21749 21882 21803 21605 21958 21559 21632 21688 22031 21400 21560 21625 21856 21486 21962 21847 21781 21646 14949 15648 16491 16591 17073 16888 17507 17460 17592 27208 23579 22748 22471 21943 22251 21767 21908 21730 21571 21917 21712 21667 21929 21668 22007 21660 11788 17623 18463 18880 18951 19088 19576 19274 19752 19405 25436 23248 22592 22328 22043 21731 22170 21653 21363 22023 21604 21849 21792 21918 21781 21856 21753 16613 19333 20061 20174 20509 20509 20803 20667 20675 20745 24200 22631 22431 21877 22133 21962 21972 21785 21911 21768 21832 21725 21973 21533 21961 21673 21883 19341 20651 20919 21205 21136 21440 21104 21543 21202 32006 22785 22205 21914 22035 21731 22027 21725 21994 21686 21902 21730 21889 21690 22021 21449 21985 21572 21081 21250 21639 21472 21703 21483 21777 21507 21780 23450 22625 21824 22032 21632 21947 21619 21896 21645 22008 21696 22029 21550 21897 21499 21511 21936 21826 21807 21881 21480 21911 21736 21801 21755 21899 21743 21902 21608 21857 21735 21812 21500 21879 21644 21748 21890 21849 21664 22098 21658 21809 21808 21831 21739 22069 21632 21747 21888 21856 21637 21751 21878 21719 21435 21939 21697 21729 21750 21877 21756 21467 22736 21836 21830 21704 21917 21714 21645 21688 21826 21723 21763 21789 21825 21800 21771 21715 21895 21676 21824 21713 21963 21693 21814 21776 21930 21681 21767 21655 21952 21649 21738 21681 21930 21722 21911 21711 21916 21729 21716 21660 21961 21719 21923 21529 21915 21737 21922 21700 21892 21735 21977 21637 21833 21699 21960 21693 21969 21714 21933 21651 21865 21573 21910 21624 21800 21805 21857 21639 21893 21553 21674 21605 21977 21511 21744 21555 22016 21697 21909 21602 21699 21655 21998 21576 21863 21605 21922 21634 21957 21545 21787 21721 21893 21610 21780 21451 21979 21846 21917 21771 21760 21883 21866 21637 21740 21691 21970 21783 21731 21629 21735 21974 21827 21693 21673 21835 21957 21573 21764 21761 21853 21842 21902 21783 21550 21831 21784 21961 21544 21832 21845 21881 21768 21754 21808 21856 21725 21898 21733 21867 21781 21894 21587 21847 21799 21838 21521 21840 21767 21947 21735 21777 21766 21933 21664 21745 21657 21963 21692 21800 21632 21989 21685 21792 21571 21999 21721 21866 21591 21947 21725 21895 21530 22002 21655 21944 21516 22010 21596 21898 21521 21949 21671 21931 21786 22030 21696 21901 21561 21870 21624 21939 21843 21897 21881 21815 21742 21640 21744 21962 21376 21817 21655 21877 21568 22008 21809 21858 21578 21936 21819 21931 21305 21943 21745 21783 21657 21882 21735 21704 21511 21904 21749 21728 21472 21902 21971 21701 21600 21701 22037 21786 21568 21763 21881 21783 21672 21703 21872 21895 21624 21820 21883 21882 22233 21498 21877 21844 21901 21696 21768 21785 21925 21736 21719 21772 21888 21766 21704 21770 21825 21737 21937 21672 21879 21863 21780 21568 21895 21783 21861 21666 21888 21797 21900 21458 21870 21745 21976 21607 21784 21708 21961 21737 21660 21587 22000 21704 21924 21544 21907 21713 21987 21646 21816 21708 21978 21669 21868 21571 21985 21655 21868 21418 21942 21683 21861 21719 21737 21630 21969 21625 21854 21568 21944 21698 21944 21576 22048 21703 21948 21742 21893 21710 21897 21543 21838 13495 16424 16836 17389 17436 17758 17813 18176 17959 18352 24915 23472 22407 22276 22229 11499 18068 19306 19410 19549 19815 19951 19837 20019 19936 25997 23310 22600 22195 22053 21997 19066 19990 20580 20637 21035 20833 20916 20767 20921 26779 23308 22388 21929 21747 21776 19535 20815 21101 21026 21377 21429 21459 21440 21492 21435 23013 22347 22226 21975 21931 19814 21376 21489 21623 21352 21657 21617 21824 21623 21754 22468 22274 21938 22017 21768 21857 21817 21995 21792 21907 21554 21916 21735 21975 21648 21853 21668 21989 21751 21884 21561 21914 21722 21979 21731 21739 21623 21926 21708 21927 21344 21864 21635 21868 21649 21891 21601 21935 21792 21720 21573 21947 21638 21957 21539 21730 21656 21814 21597 22099 21761 21943 21426 21867 21966 21771 21561 21737 21517 21904 21657 21952 21752 21885 21640 21959 21728 21854 21658 21774 21720 21804 21724 22008 21463 21955 21790 21761 21592 21696 21945 21945 21604 21757 21637 21878 21883 21784 21627 21705 21701 21903 21703 21719 21696 21703 21768 21937 21426 22016 21795 21744 21973 21729 21846 21815 21736 21707 21820 21860 21748 21704 21798 21824 
37738 35520 37192 35161 36968 34907 37673 34231 37525 34944 35861 33793 35819 32674 35326 34024 35992 33494 35584 42720 36536 34179 36723 34971 38487 34987 38087 35670 37649 34383 36039 34992 37216 35521 38473 35270 37129 42768 38225 34048 37296 34356 36695 35225 37639 34797 37104 33652 36398 35492 38344 34672 35045 34030 36645 35058 37145 34946 37524 38419 40140 37328 38805 35760 36270 35648 36899 35320 36617 37753 35079 34400 37040 36412 36352 37898 37399 34885 37360 35153 35223 35184 38240 35849 35111 35643 35494 38176 34960 33544 35417 37147 37511 35266 35407 35888 38583 37191 36416 35127 36441 37287 35631 35472 36400 37284 35620 35914 34193 37272 36098 36950 32663 37265 33812 41603 43057 39318 35419 40064 32720 40576 34284 33504 33104 41147 34568 40788 32768 40896 42165 41360 33828 40004 41548 41623 33578 40459 34639 42248 33660 40809 34268 42822 43209 42314 34592 40020 41992 43136 42752 41122 34528 41647 42760 34367 42666 42336 36079 42656 33961 35748 42555 42215 36804 42608 43158 34528 35503 32768 36055 42363 33293 32953 33413 32620 34154 32653 34704 33430 42161 34840 33069 34361 31191 30735 28779 36410 30448 27592 31360 36214 29418 41207 43495 42924 38413 35107 42777 34964 32793 32810 41888 42291 42704 33460 39331 33412 42587 42187 41392 34600 40821 42907 43334 42289 42594 34624 41722 34624 42034 34391 42178 34048 41036 34269 42148 33873 42370 34049 41860 35419 41176 35432 42550 33424 42662 36138 41651 36149 42209 35856 42872 35744 33489 35721 42568 34712 32566 34267 42546 36035 42480 35024 32696 34560 41968 36359 41959 35904 42633 35065 42135 35431 42220 35751 42521 35446 41737 36580 41964 35949 42471 35805 41760 37389 32600 34944 33136 35607 42976 35793 42565 36389 40761 37475 35104 36663 34635 34340 35075 36050 42375 36021 33541 36304 34090 36012 36592 37018 34323 33495 34986 40072 42870 36421 32896 35431 41514 35712 34423 34459 35244 37417 42040 37760 34705 33171 42528 37952 42288 35050 34929 35714 32512 36992 42925 34598 34012 35258 33275 35772 32664 35525 33896 33462 35886 35888 42587 37634 32951 34946 35599 34121 32759 36667 36457 34736 37323 33151 36784 35235 36070 35840 35255 34453 36152 33850 35113 34772 33035 35218 36552 35045 36449 35533 35861 35200 36441 34689 36880 34176 36671 34724 34818 30000 38016 31354 39206 39596 33606 34955 38748 33656 30828 37461 39684 41948 39837 36713 38983 34057 36960 35127 36792 34384 36992 33059 36659 42673 36519 34057 35533 33800 37040 34633 37097 33538 35692 34520 34665 34000 36275 32856 36752 41784 37727 33554 35906 33575 34941 42849 36367 34320 36992 33251 36812 36081 36482 32761 35330 42346 36343 33601 36103 34146 35870 32624 35472 33458 33321 32939 32813 42416 36024 35160 36435 33368 37379 34392 34007 35862 36096 34938 35847 33804 36280 42775 37224 33080 35344 34076 35584 34528 35552 34480 34220 35393 37031 33461 36625 34849 36429 33615 37041 34606 34082 35821 34850 37096 34533 34093 37064 33255 36672 33792 33849 35268 35156 36178 34892 35527 34633 42729 37802 34512 36724 34280 33947 34400 35016 33708 35572 35557 35340 36472 34560 35048 35712 34728 35409 35571 35749 35952 35777 35784 35648 36247 34725 36202 33344 37136 33195 36875 42560 37225 33654 36758 35297 37031 34872 36656 35120 36712 34529 36298 35047 35616 35340 35188 34561 36311 35201 35136 34946 36880 35236 38018 34737 37592 34517 34791 34005 35148 35308 36592 34912 35288 35160 38560 35090 38123 35088 38407 34545 37453 34679 39861 36946 32677 32449 38915 36544 38512 38264 40368 46169 41280 41528 40035 36722 38619 34279 37220 34134 35757 41973 36731 33568 35671 33389 34776 41643 36149 34571 37383 36453 35545 34268 36721 34647 36485 42897 36054 35537 36928 33424 35020 34567 36325 33586 36631 34384 35826 35466 35984 34725 34828 34022 37217 33418 37021 32961 36696 34329 37942 34507 38056 43225 38919 34118 38058 34168 37272 36363 36602 33250 37351 34193 35753 33587 35507 33361 35184 35056 35688 34981 35161 34999 42711 37336 34836 36967 33228 36821 34103 36052 34880 35754 34165 37016 34467 36204 35904 36947 42729 37447 34397 36940 33862 37124 34105 37126 34968 37473 33426 36581 34311 38479 34146 37138 34384 37332 34353 37184 34456 37966 34478 37249 34702 37464 34877 37269 34391 37139 34424 37080 34291 37248 34635 37120 35016 36646 35000 36565 34841 36867 35124 37112 34764 38912 34644 38624 34266 34353 34173 35949 34129 35648 33620 34582 34655 35077 34509 37188 34025 36384 33876 38248 41814 37268 33653 35674 34372 37081 33524 36156 33822 36936 32800 36216 33420 36512 42416 38106 34457 36561 34064 36808 33572 38627 33888 38528 32987 37266 34243 37314 33717 39472 40292 36448 35733 39171 37744 41282 39635 43035 39056 44231 40339 41489 35616 39323 35642 38368 34511 37184 33510 37376 33210 39077 33638 39137 33512 39026 34640 37489 34900 38234 35523 36577 34733 40873 38453 35194 36929 34792 37408 35384 37709 36023 33027 36336 33904 36695 38369 36144 37594 35271 36452 35792 36424 35906 36903 35840 35904 35200 35698 35729 35889 35609 36521 35469 36089 35593 38824 36029 39989 36056 36352 35341 36656 35665 35208 35380 35778 34844 35004 34976 35344 34345 36967 35045 35637 35713 36401 34728 35792 35888 35479 35705 36352 35545 36719 35633 37038 35302 37801 34232 37953 33841 38101 33410 38592 34039 37173 35826 38640 35459 37267 37510 37674 36177 37398 32896 38152 33511 37926 33105 36929 34080 34092 38554 38028 38215 38477 37465 37124 32718 35668 36626 36672 34536 36526 34841 34413 34647 36636 33270 36663 34224 35957 34550 34821 35516 36664 35984 35888 34887 33797 37050 34586 35018 35425 35093 34568 34008 35270 35046 35485 34376 35433 35072 35280 35868 36464 35669 34432 35173 36864 37852 36613 36979 35712 37360 36592 37496 35072 37888 34386 35352 36248 35866 35088 37312 35853 36056 36008 36274 35840 36561 42816 33145 34158 41479 35328 39200 35409 34157 34368 41040 38016 37458 35099 37579 35033 37284 34663 37356 34944 38042 34742 37869 33496 38052 35398 37328 33208 37920 35776 37654 34582 37655 34370 37513 34588 37080 34602 37044 35352 36567 35271 35978 35260 38380 35254 37017 35611 37287 35416 37641 34140 38272 33843 38395 41873 38648 34837 36388 35008 38104 34852 38075 34179 37174 33961 37281 33757 37037 33977 36505 34091 36763 33904 37512 34150 37493 42953 37888 33963 37430 42808 38938 33393 37952 34800 37239 37716 34550 34220 36717 38154 38634 35972 37158 36917 36983 33801 37621 34268 36288 34085 37782 34848 37945 36893 36985 35152 35757 35509 37469 34285 36075 36372 37841 42720 37226 34903 35639 34118 38088 34179 36971 35237 36570 35236 34034 37856 34913 35047 35261 36656 37436 36154 38628 33775 35299 35079 37671 34052 35173 38358 36208 36364 37939 37641 35756 35568 35338 37383 33482 36429 37125 35859 35236 37222 35423 35717 36448 36293 33933 37065 36400 35532 35124 37050 34864 37101 36109 36548 33843 37276 36009 36165 35915 38490 42083 37524 35979 37213 34344 37536 35272 36458 35590 37146 33751 37512 35597 35952 35304 38410 33224 37897 35184 40472 34716 38416 34411 37386 34949 37120 34807 38224 35037 36704 35667 37912 34055 38048 34864 35904 35094 37222 33426 37712 33461 36930 34755 37146 34599 36938 34380 37491 34362 35437 35159 37461 35837 37914 32852 37137 34354 37472 34306 39475 33808 38129 42560 36978 43024 38784 34219 35968 34976 37152 33171 37405 34896 37237 35969 37367 32933 36455 34746 37088 34352 35628 34280 36976 34663 37312 34466 36928 33973 37936 34816 36889 34648 35971 34995 37032 34064 37522 35187 34306 36471 35280 35597 38981 35067 34448 36636 35336 35783 35885 34360 37479 35328 34537 38272 34915 33429 38113 35456 35448 37242 35090 36232 36216 36279 38186 35080 33979 38187 35840 37153 35475 37068 34704 37924 35978 37824 36301 36640 35914 36545 35113 36599 36557 36944 35725 35339 35272 36676 33997 37170 34602 37092 36091 40618 35898 37260 34672 37708 35863 36576 35800 37195 34503 37864 34689 36800 35928 35661 35568 37440 34146 37948 34644 37712 35392 37260 35021 38392 32999 37990 35361 36866 35932 37259 34605 38035 34277 38509 35344 36662 35388 36980 34936 38228 43200 38953 33677 38029 34585 36644 35351 36832 34695 37232 36967 37857 37143 35705 35200 37970 34023 37317 35862 38848 34114 35706 37189 36380 34100 37888 33666 33945 34823 38797 41885 33697 34252 36611 42943 38320 36964 36000 34501 35273 32469 30152 31285 36297 34649 31028 30176 31715 42360 35172 36060 43414 38272 41389 36106 37300 35479 33616 37510 35166 34688 37594 34726 38632 34778 32246 32391 30865 35200 36327 37660 33005 39611 34948 41189 44208 41689 34296 41687 39159 35699 40197 34761 41493 38888 34120 36726 35920 37608 36021 36680 35872 31639 40064 38603 39735 32441 32070 35336 34124 34039 34710 41429 35072 43054 37457 39997 38163 38177 36113 37527 35752 36480 35597 38169 33355 37920 34904 37280 40561 34168 36851 39995 39107 42227 38960 33511 39688 43075 36525 40811 37668 38791 35656 38689 35675 38419 35092 37360 35478 37033 35077 38496 42524 38524 33664 38488 40211 34652 42369 35559 42849 36115 32755 35687 43456 34851 36237 38485 34179 37898 34347 37072 34599 38466 35008 38704 33605 37161 43136 33264 37444 36440 36502 37229 42744 37818 35617 36215 35972 37360 35968 37393 34098 36714 35709 36241 43013 37568 34519 35601 37035 36848 34537 39287 34764 36153 36116 36649 35761 39128 34224 35664 36928 36728 34381 35827 37148 35524 42347 38040 35111 35381 35749 37140 35942 42690 36045 36630 36567 35111 37587 35280 34531 34845 36336 35545 35683 36140 36408 36112 35920 35312 37284 34919 36244 35224 38106 35280 36329 35703 37641 34901 35815 34647 37660 34477 35564 34800 37605 35484 37483 35542 37491 35489 35254 34626 37976 35571 37557 33168 37448 35688 37447 35084 37047 35728 38231 34444 36520 35136 37890 35281 37993 35300 37776 34598 36948 33696 37302 34298 36021 36329 36819 34470 37145 33369 34723 34017 38150 33019 35386 33411 38151 35106 37366 33989 35022 34624 38519 33708 36957 34135 37365 34243 37901 33399 36011 35424 37173 34196 35754 42496 38627 36873 37649 35987 35479 37311 37051 34400 35584 35128 37984 36161 35539 34524 35606 38160 36592 35226 34789 36649 38004 33750 35533 35564 36923 36645 37431 36135 33452 36540 35910 38037 33294 36364 36757 37253 35746 35828 36098 36699 35605 37223 35628 37108 35989 37200 33882 36783 36295 36760 32916 36362 35872 37976 35773 35802 35733 37801 34586 35584 34584 38081 35174 36072 34073 38292 35088 35875 33588 38583 35547 36980 34016 37895 35656 37303 33136 38304 34771 37712 32976 38496 34084 37168 32917 37880 34968 37717 36069 38740 35021 37362 33614 37040 34283 37701 36776 37287 37264 36538 35789 34265 35446 37997 41460 36672 34704 37098 33439 38404 36338 36813 33752 37454 36601 37799 41036 38147 35744 36049 34624 37132 35739 35080 32898 37008 35833 35299 42451 37676 38230 35257 33792 35046 38691 36128 33397 35575 37200 36116 34714 35192 36864 37348 34318 36373 37341 37267 41044 43276 37487 36705 37440 34961 35645 36000 37611 35584 35462 35804 36932 35783 35093 35744 36384 35639 37636 34775 37233 37106 35900 33363 37195 36110 36965 34650 36883 36192 37312 42475 37440 35708 38120 34293 35840 35236 38000 35722 34673 33756 38241 35200 37468 33252 37248 35275 38314 34649 36256 35253 38202 34865 36988 33649 38121 34784 36992 42135 38074 35048 36902 35520 35616 34480 37968 34450 36880 33426 37639 35079 37713 33671 38573 35382 37880 35864 37184 35420 37224 33419 36617 30055 28953 33629 39842 30377 33770 34390 37943 36219 40053 38471 43680 43076 41447 41130 29576 36848 40172 41303 33041 35632 37376 36123 37806 36902 40106 42269 34520 40480 39139 38629 37927 37537 33052 33645 38019 35888 36699 35325 36845 38064 42048 42757 37957 35848 35686 32643 35712 38940 37952 41551 42471 42848 42416 43145 42744 39302 42313 41065 38513 37888 35719 41312 43037 34763 41280 34856 34092 36200 34418 35760 43168 41408 37895 38480 35808 36802 36457 38560 36008 37382 33384 37392 35748 38282 34396 36880 34680 38324 36004 37260 33578 37349 35477 38326 35648 35750 34400 37530 35312 37697 41264 37120 34348 36966 34447 37088 33968 37828 35981 35312 33600 37856 34425 37904 33293 35293 34425 36288 34089 39384 35748 37910 42144 37383 38248 36009 33531 35508 32987 37008 34663 37653 35811 37344 34341 38016 35402 36921 34688 35877 35305 36216 35472 38471 42768 38235 36276 35602 33797 34788 37824 37946 34069 35904 34348 37072 37360 35971 34480 35159 35117 37477 35342 35449 34860 35200 35649 37651 42128 38545 36257 35534 38164 35520 36728 36491 35546 35287 36437 36842 35731 35072 36117 36294 
23991 24134 23832 24214 23860 24355 23904 24128 23748 24147 23632 24046 23777 24049 23714 24109 23753 24128 23709 24079 23642 24228 23733 24271 23840 24295 23816 24258 23754 24154 23772 24160 23872 24237 23811 24215 23603 24366 23731 24233 23795 24143 23680 24130 23767 24228 23868 24054 23694 24136 23764 24162 23559 24178 23809 24136 23451 24097 23822 24170 23469 24019 23799 24184 24160 24105 23712 23959 23814 24040 23795 24010 23788 24199 23808 24249 23875 24164 23899 24104 23794 24007 24014 23914 23784 23887 23941 24176 23772 23783 23777 24245 23869 23875 23782 23938 24008 23944 23723 23928 24106 23931 23787 23989 24164 23392 24070 23794 24152 23946 24173 23840 23740 23932 24155 24088 24114 23785 24135 23869 24069 23794 23953 23815 24263 23858 23960 23691 24093 23905 24160 23756 24059 23735 24241 23852 24182 23622 24137 23768 24246 23767 24088 23566 24218 23801 24288 23744 24084 22540 22679 22423 22354 22841 22554 22686 22727 22597 22567 22798 22146 22692 22676 22694 22657 22935 22529 22825 22663 22763 22679 22839 22656 22996 22668 22723 22877 22656 22670 22904 22679 22789 23003 26 4183 4745 6446 7177 8792 8751 9781 10023 10707 34816 30540 27864 26874 26112 25409 25017 24973 24489 24628 24167 24242 24125 24201 23791 24079 23731 23886 23662 23913 23543 23903 23552 23414 23626 23745 23436 23792 23398 23662 23383 23640 23299 23728 23152 23680 23334 23444 23370 23668 23067 23699 23233 23299 23261 23599 23143 23703 23103 23600 23235 23564 23155 23683 23072 23617 23225 23493 23184 23613 23127 23591 23243 23511 23164 23681 23085 23618 23137 23531 23239 23562 23063 23515 23142 23440 23432 23516 23031 23533 23107 23584 23132 23668 23044 23625 23132 23409 22878 23713 23044 23296 23480 23407 22920 23765 23280 23538 23099 23637 23241 23477 22924 23544 23254 23608 23256 23553 23383 23419 23071 23431 23344 23449 23214 23619 23068 23415 23400 23628 23315 23520 23282 23501 23248 23536 23213 23596 23315 23552 23284 23423 23341 23328 23172 23689 23237 23484 23458 23341 23284 23656 23258 23363 23597 23398 23285 23689 23450 23506 23477 23360 23355 23362 23098 23526 23519 23307 23525 23047 23674 23439 23416 23392 23659 23298 23546 23468 23547 23415 23473 23031 23619 23393 23570 23376 23588 23287 23718 23160 23701 23462 12157 14038 15325 15681 16656 16483 17323 17309 17824 17626 29173 26455 25977 25116 24985 24649 24845 24263 24590 24015 24390 23997 24281 23846 24272 23623 24276 23747 23911 23788 24001 23653 24065 23476 24106 23593 24011 23617 23861 23623 23952 23425 24020 23512 23904 23452 23910 23552 23879 23447 23779 23506 23862 23376 23878 23331 23844 23299 23901 23306 23723 23157 24015 23609 23959 23616 23801 23725 23431 23176 23925 23222 23368 23239 23752 23745 23756 23457 23735 23361 23746 23484 23763 23484 23836 23368 23762 23499 23556 23504 23656 23461 23589 23433 23852 23751 23661 23481 23618 23695 23497 23606 23609 23378 23799 23502 23587 23491 23575 23611 23540 23682 23572 23335 23678 22912 23893 23512 23580 23631 23552 23841 23482 23733 23537 23510 23188 23644 23704 23573 23561 23651 23402 23762 23460 23872 23406 23669 23479 23785 23660 23766 23530 23792 23544 23706 23458 23770 23530 23776 23572 23804 23547 23652 23447 23633 23479 23220 23524 23796 23449 23837 23408 23808 23457 23898 23386 23869 23395 23916 23370 23949 23337 23923 23312 23920 23311 23973 23325 23939 23351 23924 23413 23913 23367 23920 23364 23914 23300 23937 23330 11099 17522 19143 19083 19885 19640 20355 20016 20545 20372 29100 25753 25451 24700 24728 24185 24529 23993 24480 23904 24293 24169 24135 23817 24107 23749 24018 23548 23976 23681 23928 23735 23965 23639 23704 23877 23945 23669 24004 23695 23794 23585 23700 23713 23842 23578 23777 23494 23874 23788 23804 23591 23819 23785 23872 23877 23960 23680 23562 23706 23877 23722 23797 23592 23559 23668 23607 23645 23791 23656 23716 23523 23713 23561 23755 23558 23905 23448 23958 23573 23781 23568 23790 24128 23826 23783 23668 23757 23573 23697 23713 23773 23756 23660 23698 23665 23781 23663 23755 23808 23589 23731 23632 23844 23643 23761 23572 23868 23565 23803 23509 23860 23505 23896 23538 23943 23505 23891 23503 23898 23517 23907 23502 23952 23882 23954 23632 24026 23424 23975 23508 24005 23338 24001 23464 23949 23489 23943 23495 23959 23405 24047 23366 24041 23396 24069 23399 23893 23431 23928 23581 23872 23511 23813 23539 23892 23498 23835 23531 23834 23440 23864 23735 23810 23640 23949 23424 23859 23528 23932 23464 23714 23329 24018 23867 23852 23553 23534 23785 23507 23517 23278 23721 23682 23520 23771 23420 23781 23813 23840 23613 23742 19142 20808 21059 21344 21585 21609 21788 21760 21762 32054 25435 24679 24421 24215 24159 23945 24064 24094 24010 23893 23972 23879 23733 23764 23901 23759 23686 23773 23776 23804 23606 23773 23696 23759 23984 23721 24120 23433 24006 23502 23930 23664 23894 23653 24016 23718 23998 23564 23981 23658 23956 23456 23970 23501 23978 23539 24000 23432 24024 23573 24089 23559 24004 23511 24039 23445 24064 23463 24081 23546 24029 23515 23990 23528 24000 23559 23985 23528 23994 23426 24079 23453 24039 23449 24031 23493 24000 23552 24024 23560 23992 23575 23952 23535 23952 23585 23922 23547 23944 23559 24423 23464 24032 23398 23945 23560 23882 23453 23789 23479 23879 23530 23941 23347 23944 23564 23920 23424 23753 23493 24050 23366 23968 23834 24008 23554 23896 23490 23956 23467 23906 23424 23858 23396 23864 23693 23878 23740 23968 23710 23872 23562 23872 23465 23911 23578 23857 23535 23803 23635 23825 23641 23661 23737 23812 23751 23740 23734 23788 23697 23735 23686 23597 23688 23748 23878 23700 23832 23784 23716 23737 23652 23848 23520 23767 23581 23882 23628 23816 23507 23767 23296 23778 23904 23648 23785 23540 23814 23656 23880 23539 20021 22056 22713 22533 22993 22676 23024 22679 23072 22632 25362 24024 24462 23929 24229 23313 24144 23729 24010 23712 24118 23715 23991 23635 24000 23677 24009 23706 23942 23768 23931 23680 23860 23665 23840 23659 23960 23648 23783 23601 24025 23565 24065 23521 24102 23511 24096 23500 24096 23515 24020 23589 24005 23597 23934 23656 23861 23632 23911 23497 24100 23591 24032 23566 23856 23587 23976 23791 24024 23578 23954 23508 23959 23680 23936 23572 23937 23459 23900 23484 24054 23388 23695 23570 23951 23684 23857 23495 23874 23597 23552 23640 23895 23510 23881 23699 23971 23615 23716 23559 23848 23401 24011 23559 23744 23537 23974 23702 23866 23515 23917 23633 23849 23584 23776 23616 23819 23973 23858 23837 23891 23677 23805 23744 23925 23645 23657 23687 24071 23552 23828 23753 23770 23635 23652 23982 23660 23506 24002 23727 23760 23792 23888 23692 23588 23843 23692 24230 23751 24011 23753 23752 23657 24002 23602 23882 23791 23699 23681 23895 23641 23736 23792 23940 23643 23951 23680 23843 23680 24017 23439 24006 23657 23955 23682 24007 23692 23842 23708 24029 23446 23937 23657 23377 23624 24079 23552 23908 23629 23975 23552 24087 23625 23853 23633 24064 23418 24064 23651 24019 23602 24075 23488 24023 23672 23959 23552 24039 23563 23977 23689 24022 23584 24073 23500 24064 23656 23849 23586 23982 23497 24080 23592 23957 23572 23992 23501 23977 23507 23888 23543 23959 23520 24031 23457 24013 23491 23913 23580 24003 23345 23900 23576 23892 23771 24070 23433 23852 23403 23905 23652 23917 23371 24023 23624 23873 23584 23897 23304 24019 23580 23785 23664 23912 23664 24021 23657 23948 23662 23719 23564 24053 23733 23760 23805 23703 23771 23977 23632 23744 23728 23780 23825 23847 23630 24069 23735 23661 23872 23764 23574 24049 23685 23698 23730 23830 23756 23826 23721 23932 23727 23738 23652 23729 23817 23680 24000 23745 23953 23936 24055 23728 23926 23690 23803 23575 23962 23629 23818 23766 23718 23845 23885 23536 24013 23707 23859 23789 23991 23744 24050 23633 24047 23651 23955 23696 23911 23631 24083 23256 24031 23690 23912 23698 24000 23564 24029 23616 23974 23731 24052 23619 24135 23547 24073 23605 23989 23606 24016 23577 24086 23530 24086 23630 23937 23688 23664 23641 24096 23510 24104 23585 24010 23601 23893 23592 23947 23554 24048 23683 24050 23712 23799 23581 24046 23552 24046 23425 24005 23539 23948 23519 24008 23612 24041 23848 23986 23513 24064 23624 24007 23648 24028 23601 23900 23706 24123 23625 24132 23758 7111 11332 12821 13197 14459 14400 15023 15079 15673 15612 32372 28245 27279 26301 26044 25447 25390 25286 24964 24697 24960 24509 24798 24562 24469 24620 24398 14371 16876 17606 18515 18555 19120 19153 19203 19526 19614 29024 26809 25968 25841 25294 25152 25085 24647 24512 24899 24806 24511 24709 24434 24624 24364 24546 17820 19910 20360 20710 20897 20989 21175 21431 21355 33415 26674 26007 25205 25331 24858 24774 24636 24759 24509 24832 24306 24689 24234 24533 24237 24422 24224 20880 21434 22203 21892 22505 22085 22592 22316 22699 27968 25830 24734 25101 24472 24807 24320 24577 24306 24928 24140 24607 23933 24593 24038 24431 23932 20389 22388 23148 22756 23378 23010 23360 23062 23456 23095 25670 24274 24695 24020 24528 23978 24298 23904 24350 23765 24547 23881 24279 23964 24215 24029 24460 23717 23864 23793 24201 23902 24207 23793 24167 23763 24275 24010 23953 24097 24209 23667 24119 24009 23959 23971 24099 23399 24189 23984 24041 23949 24098 23906 23820 24071 23953 23847 24256 23831 24244 23975 24199 23782 23932 24230 24024 23691 24096 23885 23962 23611 24064 24239 23741 24008 23796 24130 23834 24114 23865 23943 23809 24142 23868 23998 23889 24195 23952 24000 23824 24192 23830 23992 23956 24059 23965 24503 23793 24175 23836 24152 23686 24182 23848 24116 23612 24123 23849 24159 23589 24166 23802 24184 23866 24125 23751 24213 23681 24066 23696 24185 23831 23905 23677 24180 23783 24181 23680 24135 23706 24086 23488 24055 23733 24036 23584 23921 23845 24082 23798 24033 23496 24076 23637 24108 23583 24196 23744 23991 23506 24008 23766 24192 23696 23882 23548 24007 23777 24006 23752 24224 23736 24072 23659 24032 23606 23968 23900 24160 23917 23911 23842 24179 23800 23920 23717 24149 24082 23944 23853 23804 23959 24112 23702 24005 23848 24214 23872 23815 23784 23861 23989 23828 23746 23735 24111 23681 24005 23735 23850 23782 23991 23977 23662 23799 24018 23800 24068 23632 24004 23793 24027 23701 24001 23783 24140 23757 23936 23744 24151 23773 23984 23689 24145 23769 23832 23658 24142 23766 24095 23614 24160 23724 24149 23547 24135 23735 24127 23704 24045 23753 24179 23524 24076 23735 24193 23680 24040 23671 24088 23559 24032 23820 24103 23672 24008 23603 24129 23500 24156 23949 24068 23427 24182 23694 24064 23983 23962 23598 23976 23654 23958 23552 24088 23597 23844 23672 23778 23789 23963 23893 24029 23668 23761 23720 23950 23752 23889 23704 23978 23895 23763 24013 23951 23728 23680 23922 24027 23831 24155 23887 24113 23894 23779 23680 24162 23738 23892 23701 24040 23819 23774 23738 24096 23639 23635 23890 23861 24112 23657 23911 23825 24045 23993 24016 23868 24022 23868 24000 23770 24151 23857 24049 23617 24078 23819 24103 23570 23979 23740 24123 23704 23957 23744 24151 23697 23957 23682 24140 23762 24200 23623 24148 23755 24112 23586 24096 23711 24144 23770 23992 23685 24174 23671 24115 23673 24077 23786 24093 23489 24178 23611 24061 23640 23987 23669 24085 23607 23873 23623 24198 23594 24032 23415 24087 23635 24021 23520 24041 23660 23719 23569 24051 23351 24073 23442 24089 23671 11283 12846 14325 14650 15648 15664 16174 16242 16480 37389 29982 27587 26679 25872 25724 15357 18387 18983 19438 19422 20001 19776 20014 19946 20303 29256 27146 26229 25914 25476 15265 20120 20928 21015 21497 21836 21776 21655 21836 21837 29022 26405 25837 25703 24583 25184 21225 22478 22442 22586 22592 22968 22680 22920 22705 28800 25783 25542 24964 24984 24727 22811 23177 23598 22997 23578 23362 23677 23416 23562 23263 25405 24700 24993 24416 24673 24279 24762 24317 24725 24389 24520 24172 24670 24181 25019 23978 24576 24121 24594 24041 24376 24109 24512 24138 24375 23901 24395 24055 24541 23943 24432 23980 24458 23971 24388 23964 24287 23981 24335 24123 24320 23772 24373 23872 24303 23840 24085 23878 24443 23841 24335 24198 24229 24104 24482 23809 24174 23815 24320 23922 24130 23891 24136 23815 24256 24137 24208 23865 24068 23831 24212 24093 24080 23719 24154 24018 24099 23693 23904 24020 24234 24027 23956 23975 23936 24082 24231 23943 24068 23872 24178 24049 24039 23858 24264 23827 24119 23923 23909 24264 23921 24197 24000 24157 23778 23997 23909 24150 23988 24184 23817 24038 23940 24164 
22232 22288 21597 22435 21571 22192 21638 22186 21995 22033 21750 22110 21633 22102 22051 21970 21827 22125 21868 22073 21827 22256 22041 22108 21815 21738 21608 21809 21599 21927 21920 22029 21902 21761 22235 21864 21698 22341 21987 21551 21717 21936 21783 22234 21740 22174 22128 22000 22009 21516 21949 21757 21982 21760 21664 22002 22007 21655 22056 21820 22251 21715 22251 21612 22171 21889 22071 21575 22452 21698 22287 21709 21882 21674 22209 21652 22009 21575 22212 21690 22110 21432 22243 21688 22292 21419 22180 21572 22231 21541 21992 21564 22256 21771 22117 21405 22208 21616 22256 21575 21751 21635 22072 21706 22043 21539 22151 21625 22125 21341 22023 21474 22093 21421 22103 21703 22084 21717 22064 21895 21918 21603 21928 21404 22307 21416 22217 21999 22108 21392 22084 21504 22082 21628 22002 21401 22057 21703 22075 21808 21716 21654 21894 21980 22364 21542 21805 21545 21676 21966 22104 21443 21910 21789 22029 21936 21895 21573 21884 21514 21847 22103 21806 21778 21947 21467 22163 21743 21507 22114 21696 22273 21648 21809 21398 21973 21936 21960 21671 21680 20939 22035 21811 22160 21476 21872 75 75 88 72 71 87 70 15965 16908 15696 16168 15017 15528 14545 15447 14678 15060 14167 15192 14092 14905 14171 14565 14050 14933 14329 14558 13899 14764 14112 14820 14146 14708 14345 14850 14109 14345 14005 14623 14407 14713 14384 14807 14450 14823 14322 14959 14743 14621 14361 15066 14649 14551 14727 14820 14470 14886 14776 14979 14843 14918 14513 15157 14773 14861 15048 14979 14832 15242 14938 14958 15256 15093 15078 15554 14940 15210 15470 15131 15032 15287 14931 15599 15271 14928 15632 15360 15242 15385 15664 15041 15573 15366 15417 15471 15736 15245 15687 15522 15426 15461 15769 15274 16041 15449 15675 15618 15943 15577 15945 15537 15957 15685 15827 15537 16206 15453 16084 15736 16007 15795 16204 15463 16256 15573 15971 15857 16281 15433 16454 15676 16283 15808 16289 15694 16487 15656 16455 15893 16292 15953 16493 15721 16539 15994 16327 16005 16594 15909 16679 16055 16630 15982 16643 16020 16628 16074 16615 16087 16640 15973 16551 15975 16628 16533 16581 16096 16767 16033 16821 16113 16597 16183 16962 16409 16837 16033 17017 16257 16983 16121 16925 16343 16555 16674 16609 16132 16928 16435 80 81 259 76 76 71 71 75 76 20970 21971 21169 20852 19550 19744 19188 19281 18679 18615 18391 18442 17975 18136 18247 17792 17597 18025 17879 17865 17746 17652 17920 17762 17354 17929 17482 17638 17472 17557 17660 17458 17536 17553 17321 17841 17230 17848 17424 17529 17169 16790 17444 17229 17647 17319 17899 17123 17858 17291 17716 17456 17720 17268 17789 17362 17655 17188 17831 17580 17849 17292 17920 17311 17856 17415 17757 17687 17609 17401 17837 17312 18043 17132 18077 17704 17959 17521 17829 17543 17637 17491 18044 17361 18144 17542 18039 17512 17982 17537 18119 17480 18135 17354 18222 17275 18083 17590 17953 17608 17867 17609 18029 17511 18238 17465 18297 17219 18212 17437 18162 17561 17945 17600 18140 17623 17975 17753 18054 17431 18163 17681 18289 17561 18358 17658 18332 17559 18352 17515 18368 17733 17722 17677 18072 17541 18165 17797 18423 17549 18086 17745 18249 17679 18065 17696 18302 17760 18459 17593 18167 17376 18411 17895 18078 17975 18320 17857 18537 17947 18105 18057 18264 18067 18356 17980 18327 18033 18396 18008 18442 18065 18389 18018 18403 18021 18447 17920 18573 18221 18408 18189 2823 3584 4763 5049 5863 5901 6444 6528 7079 7042 24000 23128 21637 21815 20621 20662 20263 20360 19854 19971 19552 19732 19561 19555 19267 19425 19031 19231 19002 19274 18839 19287 18901 19264 18740 19123 18858 19101 18887 19133 18816 19229 18721 19020 18709 18937 18759 18901 18728 19106 18688 19088 18676 18915 18640 18989 18657 19131 18640 19002 18658 19024 18675 19072 18737 19047 18672 19025 18668 19086 18608 19180 18587 19301 18459 19293 18446 19188 18381 19112 18567 19093 18535 19175 18433 19107 18492 19123 18393 19133 18578 19294 18403 19317 18158 19196 18581 19143 18441 19177 18641 19132 18552 19248 19315 19051 18759 19080 18737 19016 18708 18997 18883 19202 18645 19232 18621 19118 18891 19028 18979 18992 18870 18967 19245 18808 18969 18949 18944 18904 18799 18902 18912 18981 19009 18984 18823 19119 19076 18941 18949 19061 18759 19167 18795 19408 18809 19277 18930 19372 18989 19292 18923 19411 19239 18890 19147 18904 19253 19111 19392 18960 19415 19089 19394 19284 19416 19208 19231 19089 19251 19264 19511 19163 19385 19109 19440 19112 19342 19221 19369 19262 19304 19211 19389 19092 19383 19194 19383 19251 19458 19143 9524 10264 11153 11275 11907 11835 12503 12309 12888 23221 23191 21968 21834 21095 21100 20599 20663 20256 20467 20065 20294 19936 20171 19803 20208 19538 20096 19380 20062 19392 20064 19389 20101 19414 19984 19305 19989 19341 19907 19193 20089 19287 19857 19255 19920 19174 19776 18880 19995 19375 19773 19418 19795 19806 20022 19128 19699 19450 19972 19734 19823 19393 19961 19560 19577 19388 19770 19317 19859 19814 19831 19424 19804 19397 19971 19400 19947 19463 19964 19537 19872 19548 19881 19443 20013 19336 20065 19395 20027 19340 19872 19539 19959 19508 19859 19648 19802 19536 19655 19496 19687 19607 19866 19674 19686 19698 19680 20362 19869 20028 19770 19807 19577 19968 19730 20043 19497 19991 19601 19845 19361 19837 19809 19934 19665 19990 19500 20170 19521 19981 19445 20099 19516 20012 19543 20003 19512 20080 19609 20134 19676 20125 19559 20167 19688 20086 19641 20138 19681 20120 19683 20144 19652 20136 19568 20177 19610 20209 19545 20241 19646 20151 19620 20185 19667 20206 19703 20233 19653 20220 19552 20311 19557 20386 19584 20288 19645 20184 19628 20224 19575 20255 19564 20214 19417 20229 19541 20276 19493 20343 19515 15170 15408 16129 15735 16885 16279 17246 16621 17057 16892 22444 21922 21449 20801 20801 20386 20359 20280 20525 20203 20573 20070 20573 20051 20392 20186 20471 20050 20378 20066 20399 19942 20282 19788 20489 19797 20232 19972 20529 19849 20480 19885 20757 19968 20483 20023 20407 19975 20097 20119 20023 20117 20109 20144 20041 20332 20095 20007 20292 20097 20260 20124 20116 20193 20251 19931 20172 20173 19911 20007 20362 20557 19661 20220 20048 20297 19834 20348 20282 20448 20096 20480 20315 20340 20047 20567 20289 20532 20036 20438 20232 20647 19985 20600 20064 20252 20150 20547 19982 20288 19970 20579 19968 20279 20131 20691 19897 20407 20150 20633 19921 20560 20129 20629 19950 20687 20096 20583 19976 20742 20038 20524 19992 20744 20001 20509 20152 20684 19883 20558 20182 20615 19920 20644 20112 20608 19993 20773 19932 20696 20039 20611 19918 20701 19959 20869 20047 20713 20023 20474 20135 20567 19892 20689 19976 20604 19955 20688 20374 20771 19956 20506 20001 20194 20146 20571 19718 20732 20120 20645 20249 20679 19830 20570 20048 20406 20585 20443 20320 20648 20109 20613 20232 20658 20276 20645 20049 20625 19915 20598 20264 20364 20147 20708 20060 20625 20326 20589 20517 20540 20573 20796 20254 20544 20312 20551 20264 20532 20679 20262 20235 20629 20262 20475 20560 20420 20364 20480 20281 20711 20367 20200 20527 20393 20711 20615 20642 20103 20851 20672 20449 20216 20908 20103 20675 20455 20401 20442 20759 20311 20647 20621 20642 20498 20657 20158 20759 20560 20552 20461 20859 20257 20930 20439 20600 20485 20899 20332 20896 20352 20817 20462 20850 20268 20928 20270 20773 20464 20907 20328 21046 20338 20961 20397 20794 20357 20962 20193 21085 20361 20796 20423 20983 20244 21071 20367 20840 20457 20949 20375 21050 20160 20970 20407 20895 20467 21072 20280 20920 19892 20997 20315 20668 20359 20903 20492 21006 20232 20896 20327 20928 20264 21039 20069 20963 20244 21035 20263 20821 20045 21136 20442 21063 20589 20553 20422 20786 20192 21147 20666 21131 20697 20835 20565 20804 20265 21041 20377 20945 20631 20872 20589 20854 20277 20872 20598 20828 20747 20812 20585 20797 20803 21024 20641 20748 20980 20663 20653 20893 20470 21064 20591 20780 20977 20705 20637 21042 20469 20946 20569 20719 21084 20839 20674 20695 20370 21100 20581 20935 20985 20695 21417 20480 20700 20468 21212 20379 21235 20485 21054 20840 20631 20944 20797 20901 21136 20853 20845 20904 20722 20709 21037 20543 21197 20589 21170 20836 21037 20759 21128 91 81 56 77 73 643 724 1443 1477 2200 28357 28000 26241 26291 25034 24924 24133 24379 23375 23831 22800 23417 22496 22956 22396 22645 22171 2819 3563 5435 5351 6735 6544 7409 7376 7943 28368 29139 27285 26872 25373 25581 24474 24669 23777 23718 23229 23189 22759 23156 22572 23120 22088 22800 7417 9527 9794 10931 10817 12059 11784 12781 12343 28807 26993 26499 25417 25008 24283 24548 23463 23754 22907 23286 22667 22968 22705 22653 22133 22635 11973 12806 13472 14512 14781 15211 15707 15902 16077 16357 26346 25949 24474 24144 23536 23565 23400 22887 22525 22931 22426 22678 22070 22337 22503 22272 22074 17073 17289 18104 18035 18231 19020 18757 18817 18839 19382 23969 23878 22747 23040 22567 22489 22210 22288 22016 22208 21692 22264 21928 21850 21719 21994 21543 22174 21238 21948 21641 21806 21521 22050 21314 22069 21433 21776 21504 21864 21341 21952 21326 21843 21392 21837 21223 21914 21395 21684 21298 22007 21052 21873 21396 21561 21255 21891 21292 21762 21325 21888 21042 21905 21213 21956 21141 21777 21043 21679 21125 21761 20960 21890 21040 21791 21029 21888 21037 21500 21287 21812 21600 21799 21215 21654 21674 21496 21019 21552 20865 21736 21039 21237 21145 21452 21217 21697 21306 21658 21182 21621 21357 20970 21157 21517 21433 21499 21239 21858 21403 21591 21160 21739 21421 21349 21157 21316 21699 21287 21000 21328 21591 21446 21137 21312 21223 21642 21318 21280 21189 21806 21234 21213 21495 21088 21467 21462 21641 21002 21366 21255 21773 21257 21429 21348 21596 21297 21555 20919 21633 21287 21737 21156 21600 21199 21794 21229 21579 21006 21600 21232 21829 21072 21459 21229 21748 21249 21778 20973 21708 21220 21776 21181 21658 21182 21804 21245 21795 20992 21671 21332 21699 20973 21610 21216 21824 21087 21582 21146 21715 20982 21638 20983 21643 21257 21719 20944 21523 21000 21672 20989 21533 20769 21777 20975 21939 21435 21515 20681 21474 20787 21657 20918 21659 21284 21660 21255 21472 21307 21427 21446 21597 20904 21268 21259 21762 21315 21548 21405 21685 21223 21441 21223 21874 21385 21325 21082 21672 21309 21431 21424 21543 21500 21377 21120 21434 21274 21274 21289 21461 21463 21214 21533 21701 21508 21280 21799 21123 21556 21505 21211 21359 21722 21392 21456 21192 21688 21509 21583 21026 21659 21307 21393 21186 21580 21437 21816 21268 21763 21264 21454 21109 21789 21331 21654 21103 21768 21305 21751 21042 21815 21261 21722 21011 21856 21251 21766 21040 21754 21300 21814 21192 21721 21217 21856 20864 21705 21144 21868 20970 21800 21063 21712 20816 21733 21341 21684 21101 21780 21461 21680 20856 21775 20834 21403 21001 21974 20753 21983 20909 21073 21141 22007 21810 21736 21004 21773 21193 21483 21084 21725 21313 21667 21303 21700 21265 21824 21216 21455 21366 21608 21219 21441 21312 21792 21220 21427 21364 21660 21550 21453 21354 21584 21646 21492 21352 21560 21473 21888 21396 21416 21244 21680 21724 21729 21386 21652 21588 22060 21623 21322 21737 21388 21950 21291 21563 21227 21593 21483 21616 21265 21540 21556 21787 21174 21669 21242 21845 87 76 595 2005 2171 3199 3044 3850 3821 31304 29888 29082 27566 27345 26222 5862 6525 8142 8423 9504 9065 9906 9644 10685 30704 30835 29085 28722 27309 27174 10358 11805 12281 13529 13491 14576 13896 14964 14358 15143 30193 28884 27463 27200 25944 16375 15039 16679 16491 17462 16957 17936 17462 18417 17676 28840 26423 26662 25373 25534 24760 19050 19145 20432 19783 20085 19969 20360 20143 20549 25696 25064 24454 24608 23901 23783 23457 23904 23031 23680 23321 23214 22924 22880 23166 23126 22868 22856 22647 23088 22970 22693 22449 22518 22714 22912 22551 22483 22176 22645 22517 22302 22247 22297 22104 22763 22135 22121 21493 21899 22648 21985 22411 22060 22287 22045 22478 22157 22272 21895 22017 21998 22515 22173 22458 21841 22356 22104 22400 22032 22293 21714 22312 21958 22429 21872 22132 21824 22418 21961 22382 21643 22224 21884 22405 21811 22352 21613 22391 21724 22392 21799 22152 21689 22383 21864 22245 21609 22253 21795 22375 21701 22359 21671 22372 21632 22222 21592 22063 21714 22281 21980 22227 21506 22400 21783 21938 21557 22163 21510 22467 21214 22176 21523 22281 
