# Supplementary material for: An Active Feature Selection Strategy for DWT in Artificial Taste
Source: Hindawi journal article supplement (doi:10.1155/2018/9709505), 2018-01-01
Supplement: f1 [file 9709505.f1.zip › beer-med-3.txt]

43494 37670 34273 33015 143 3203 11355 16082 17613 18701 19033 19916 19896 20689 20505 21142 20776 21361 20846 21350 20860 21614 21181 21800 21284 21845 21242 21786 21131 22001 21299 22007 21482 22017 21513 21913 21424 21781 20949 22007 21578 22187 21460 22085 21461 22068 21486 22034 21460 22044 21594 21936 21600 22104 21487 21896 21548 21940 21413 22122 21513 22124 21621 21988 21555 21651 21493 22130 21701 22053 21409 22159 21693 21971 21510 21877 21717 21977 21924 22064 21644 21992 21623 22209 21734 22008 21760 22066 22048 21933 21691 21732 21660 21804 21801 21799 21792 22087 21966 22040 21582 21964 21788 21857 21859 22018 22133 22028 21625 21676 21552 21644 22186 21831 21956 21752 22133 21678 21865 21672 22131 21813 22009 21935 21932 21817 21939 21705 22264 21717 22163 21812 22213 21723 22060 21673 21991 21704 22112 21821 22230 21788 22146 21720 22125 21590 22023 21480 22084 21694 22230 21729 22257 21652 22216 21540 22026 21456 22022 21610 22204 21775 22245 21707 22200 21632 22091 21504 22048 21149 22196 21515 22123 21553 22117 21707 22137 21573 21972 21728 22096 21526 22128 21538 11972 16951 19457 19258 20419 20095 20550 20634 21092 20947 27184 23962 23568 22736 22505 22521 22385 21940 22260 21929 22144 21824 22278 22040 22135 21913 22268 21752 22062 21842 22106 22010 22213 21690 21788 21748 22156 21645 21897 21789 21940 22098 22205 21877 22021 21800 21883 21691 21925 21763 22144 22171 22002 21685 21773 21248 21807 21772 21935 22179 21997 21748 21613 21815 21491 22001 21605 22102 21876 22007 21784 22048 21828 21784 21751 21912 21825 22241 21825 22236 21740 22109 21563 21994 21605 22042 21668 22281 21866 22215 21666 22050 21621 21975 21709 22189 21804 22245 21741 22192 21544 21996 21432 22146 21696 22321 21691 22232 21623 22065 21573 22131 21656 22261 21796 22157 21712 22080 21504 22135 21585 22235 21546 22172 21617 22272 21573 21982 21324 21994 21851 21898 21911 22133 21644 22162 21489 22597 21687 22195 21527 22282 21505 22209 22011 21699 21380 22126 21748 22097 21482 22167 21681 22137 21744 21914 22089 21882 21614 22061 21690 22237 21607 22091 21520 21847 21984 22167 21846 21976 22038 22129 21719 21688 21597 21874 21656 21856 22049 22256 21944 21720 21742 21796 21650 21776 21696 21906 21940 21982 21703 21841 18094 20026 20640 20869 21277 21456 21449 21289 21376 27820 24553 22892 22831 22277 22383 21865 22455 22039 22198 21749 22127 21944 22174 21904 22038 21910 22291 21852 22062 21741 22252 21738 22033 21787 22234 21691 22045 21835 22267 21589 22144 21752 22100 21608 22261 21716 22093 21716 22249 21522 22171 21685 22149 21760 22262 21657 22074 21697 22257 21480 22210 21709 22206 21501 22253 21780 22008 21639 22272 21761 22032 21629 22286 21664 22093 21446 22169 21642 22076 21589 22093 21703 22119 21414 21975 21541 22146 21674 22096 21618 22063 21789 22064 21604 22151 21749 22159 21604 22063 21575 22223 21719 21577 21603 22145 21376 22098 21719 22095 21716 22151 21997 22104 21639 22039 21709 22000 21943 21999 21600 21988 21776 22084 21613 21936 21892 21918 21667 21867 21944 22257 21729 22180 21709 22023 21818 21968 21639 22000 22016 21831 22065 21940 21820 22085 21572 21720 21764 22080 21856 21931 21743 21892 21981 21975 21701 21726 21783 22381 22210 21685 22084 21693 22266 21734 21942 21575 22058 21928 22096 21849 21849 21594 22020 21913 22050 21711 22113 21545 22036 21761 22202 21719 21988 21645 21880 21702 22214 21714 22192 21638 18137 20067 20957 21107 21808 21381 21883 21408 21843 21356 24271 22571 22805 21987 22425 21687 22188 21680 22301 21820 22280 21766 22196 21626 22080 21534 22193 21735 22275 21778 22290 21647 22112 21568 22107 21249 22144 21610 22131 21579 22065 21953 22215 21656 22089 21655 21642 21477 22246 21660 22109 21568 22254 21560 21842 21988 21683 21561 21978 21535 21680 22197 22114 21543 22106 21505 22065 21843 22167 21992 22087 21815 22160 21687 21964 21604 22039 21618 22140 21912 22065 21783 21824 21738 21691 21589 21976 21706 21868 21836 21875 21824 21856 22004 22067 21938 21991 22050 22248 22004 22116 22240 22070 21910 22146 22098 22151 22100 22119 22005 22016 22051 21370 22028 21485 22061 21681 21972 21668 21955 21568 21786 21745 21737 21826 21807 21736 21926 21652 21940 21529 21990 21605 22009 21504 21977 21593 21862 21605 22048 21617 21995 21544 22057 21592 22007 21586 22051 21585 22050 21555 22077 21606 22116 21594 22117 21653 22231 21671 22246 21651 22292 21701 22277 21741 22230 21753 22250 21813 22240 21778 22195 21712 22293 21655 22247 21600 22222 21544 22153 21715 22049 21671 22090 21596 22120 21608 22046 21532 22109 21504 22193 20363 21689 21344 21985 21218 21924 21835 21962 21504 24216 22752 22288 21976 22144 21621 22152 21330 22158 21618 22064 21610 22099 21705 21888 21701 21916 21573 21998 21616 22056 21824 22098 21703 22016 21725 22024 22007 21984 21914 22169 22033 22071 21927 21904 21867 21768 21897 21993 21736 21876 21776 21911 21619 21998 21654 21696 21728 21869 21637 21786 21713 21830 21992 22145 22068 22118 22406 21662 22144 21761 22089 21830 22200 21746 22080 21813 22151 21947 22099 21813 22054 21832 22042 21677 21804 21667 22003 21577 21996 21577 21908 21504 21900 21635 21939 21632 21980 21568 22120 21628 22087 21686 22152 21670 22217 21724 22208 21694 22201 21689 22279 21653 22295 21705 22336 21717 22311 21735 22226 21696 22185 21703 22120 21672 22285 21417 22042 21604 22004 21496 22130 21488 22117 21590 22064 21661 22216 21624 22176 21657 22117 21757 22236 21571 22231 21692 22131 21549 22126 21618 22180 21682 22072 21775 22266 21783 21589 21888 22149 21743 22090 21664 21923 21698 22073 22002 22176 22032 22131 21765 21985 21649 21838 21918 21960 21984 22275 22019 22134 21939 22090 21900 21805 21728 21922 21783 21846 21890 21843 21838 22085 21176 21573 21721 21613 21659 21734 21629 21852 22164 21965 22260 21432 22528 21824 22241 21688 22185 21806 22282 21847 22095 21609 21978 21996 22117 21728 21972 21754 22138 21759 22009 21710 22248 21869 21912 21363 22140 21868 22214 21458 22181 21778 22203 21605 22155 21785 22231 21557 22094 21786 22215 21477 22183 21641 22188 21430 22205 21707 22084 21622 22214 21668 21976 21713 22250 21632 22019 21632 22298 21556 22140 21662 22213 21555 22048 21626 22084 21626 22007 21851 22183 21528 21927 21592 22114 21684 22173 21617 22093 21679 22126 21532 22251 21520 21568 21577 22145 21777 22024 21735 22071 21610 22072 21623 21974 22006 21944 21768 22041 21532 21985 21808 22085 21555 21591 21575 21981 22068 21734 21666 21659 22128 22016 21678 21859 21940 22172 21856 21943 21612 21960 22150 22055 21659 21657 21818 21968 22278 21848 22200 21804 22318 21749 21932 21677 22136 21827 22177 21786 21960 21943 22081 21933 22172 21705 21968 21841 22136 21691 22129 21735 22065 21559 22076 21771 22252 21673 22053 21632 22113 21696 22203 21671 22024 21548 22180 21688 22300 21691 22208 21464 22272 21637 22253 21717 22176 21638 21972 21610 22208 21764 22215 21619 22144 21467 22093 21566 22170 21551 22145 21592 21921 21561 22229 21582 22169 21670 22136 21508 22136 21302 22143 21594 22119 21417 22123 21735 22251 21639 22027 21795 22189 21430 22002 21588 21933 21549 22006 21774 22008 21607 22064 22105 21902 21734 22085 21942 21965 21677 21794 21645 21922 21687 21892 21932 22293 21817 21872 21616 21802 21582 21781 21927 22226 21786 21800 21576 21932 21837 21848 22161 22059 21943 21776 22006 21773 21976 21933 22032 21658 22160 21589 22009 21831 22097 21912 22060 21723 22034 21793 22096 21831 22195 21744 22001 21610 21957 21648 22204 21700 22183 21685 22064 21581 22179 21766 22295 21672 22074 21544 21952 21618 22236 21764 22241 21655 22069 21516 22177 21674 22326 21640 22100 21504 22118 21677 22265 21772 22151 21615 21997 21384 22139 21722 22279 21621 22200 21530 22369 21591 22158 21602 22141 21931 21978 21433 22059 21550 22258 21591 22165 21309 21813 21440 22113 21661 22080 21700 21894 21370 22279 22219 22152 21648 22058 21844 21684 21710 21914 21765 22033 21860 21724 21681 21985 21744 22065 21732 21884 21589 22016 21780 21907 21760 22055 21796 21956 21737 21874 21844 22041 22137 21866 21788 21873 21661 21792 22119 22151 21836 21608 21600 21786 21768 22071 21969 21773 21719 21906 22077 21972 21969 21586 22048 21397 22141 21832 22139 21892 22058 16810 19508 20097 20887 20672 21341 20909 21312 21146 36704 25113 23813 22717 22678 22119 22458 22034 22448 21868 22204 21794 22290 21849 22318 21806 22096 21575 19169 20260 21393 21049 21702 21056 21687 21330 21964 28143 24201 22648 22697 22054 22588 21995 22435 21760 22281 21731 22199 21624 22248 21783 22179 21559 12138 19922 21365 21083 21807 21264 22028 21560 22138 21432 25220 22656 22445 22087 22028 21921 22353 21847 22273 21525 22144 21634 22045 21798 22058 21748 21987 18308 21112 21636 21810 21549 21788 21901 21702 21986 21954 23424 22359 21935 22081 21924 22073 22171 21965 21585 21928 21870 22352 21933 21660 21733 21959 22001 21252 21560 21674 21520 21646 22090 21941 21836 21801 21826 22841 22061 21784 22172 21760 22215 21815 21851 21923 22288 21863 21913 21626 22055 21871 22162 21676 22151 21802 22158 21486 22148 21765 22005 21760 22154 21568 22178 21712 22071 21796 22102 21760 22146 21681 22220 21639 22292 21736 22272 21507 22294 21428 22315 21490 22265 21486 22273 21504 22216 21568 22272 21458 22264 21488 22309 21677 22300 21489 22185 21571 22132 21705 22103 21575 21485 21703 22041 21491 22233 21475 22235 21530 22125 21536 21845 21542 22289 21892 22101 21607 22232 21348 21877 21712 21624 21959 22064 21753 22022 21773 22195 21623 22090 21762 21993 21506 22086 21663 21605 21999 22049 21645 21972 21684 21760 21792 21777 21735 22052 21818 22001 22218 21696 21740 22139 21644 21996 21865 21705 22089 21898 21685 22127 21789 21936 22054 21864 21725 21844 21931 21754 22126 21600 22118 21593 22064 21582 22071 21953 22037 21925 21876 21819 22160 21675 22213 21408 22204 21689 22054 21925 22012 21745 21537 21719 22182 21610 22297 21527 22137 21655 22098 21808 21982 21732 22060 21671 22185 21606 22274 21499 22331 21450 22299 21522 22200 21636 22160 21671 22121 21698 22116 21670 22131 21542 22169 21509 22151 21673 22124 21638 22179 21682 22029 21618 22125 21748 22003 21559 22241 21804 22148 21524 22048 21463 22048 21687 21962 21688 22182 21618 22152 21691 22210 22013 21991 21611 21967 21768 22047 21656 22149 21713 22082 21612 21934 21692 21960 22091 21664 21868 21869 21819 21964 21680 22121 21256 21866 21615 21781 21863 21938 21865 21790 22035 21760 21728 21924 21607 22237 21783 22119 21784 21882 21916 21520 21888 21628 22144 21623 22382 21820 21927 21773 21870 21953 22053 21789 22001 21623 22074 21589 22115 21760 22002 21751 22120 21774 22052 21600 22150 21711 22228 21720 21972 21718 22220 21777 22269 21560 22132 21738 21984 21723 22151 21607 22313 21504 22235 21685 21860 21688 22103 21671 22256 21541 22195 21713 22112 21720 22197 21566 22185 21573 22064 21632 21944 21636 22144 21714 22011 21569 22102 21538 22150 21548 22106 21505 21909 21575 22055 21646 21709 21581 22066 21470 21648 21454 21760 21962 21946 21776 21812 21648 22010 21532 21893 21689 21845 21713 22055 21370 21993 21932 22024 21863 22017 21460 21962 21962 21840 21941 22069 21569 22071 22095 22109 21895 22077 21926 21858 21904 21976 21920 21976 21644 22124 21870 21729 21916 21512 22103 21799 21933 21637 22208 21700 9392 18770 20141 20442 21065 20921 21473 21160 21508 21036 27362 23772 23072 22615 22742 21908 19337 20601 21322 21219 21837 21257 21799 21614 21972 28160 24238 22720 22657 22158 22538 18475 21302 21187 21786 21384 22102 21546 22022 21669 22136 23376 23034 22217 22400 21844 18721 20885 21857 21376 22016 21505 22016 21561 22048 21874 23600 22227 22528 22016 22287 21648 21654 21360 21783 21483 22086 21709 22136 21608 22061 22579 22334 21874 22061 21789 22230 21887 21888 21724 22120 21624 22178 21824 22105 21696 22113 21649 21895 21968 22010 21612 21782 22135 21945 21638 22023 21843 22105 21796 22080 21665 21880 22103 21892 21641 22103 21728 21736 22112 21834 21654 22065 22032 21697 21659 22275 22028 21793 22066 21479 22247 21715 22036 21824 22186 21688 22069 21824 22171 21628 22008 21781 21964 21659 22249 21617 22009 21845 22096 21290 22167 21668 22092 21733 22049 21616 22247 21524 22303 21690 22200 21732 22016 21767 22192 21643 22193 21619 22248 21617 22222 21635 22139 21701 22134 21691 22133 21746 22091 21754 22044 21584 22385 21655 22081 21480 22152 21889 22040 21952 22080 21565 22111 21674 
21492 21870 21651 21939 21748 21717 21547 21915 21633 22145 21488 21911 21474 22216 21714 21888 21496 22024 21744 22090 21520 21792 21421 22085 21544 22210 21289 21929 21483 22241 21575 22191 21251 22089 21481 22281 21477 21999 20039 19809 20029 20023 19901 20189 20112 20525 20592 20615 20647 19319 20931 20673 21252 20737 21120 20620 21047 20896 20877 21046 21060 20967 21415 21159 21327 20971 21277 20781 21264 20869 21564 21100 21664 21120 21719 21095 21531 20919 21765 21102 21758 21162 21764 21099 21575 20983 22129 21111 21990 21165 21901 21090 21824 21018 21779 21240 21903 21335 21955 21328 21937 21261 21740 21157 21960 21136 21911 21091 21867 21226 21936 21203 21830 21252 21782 21308 21936 21159 22081 20943 21753 21017 21926 21274 21840 21341 21541 21263 22125 21402 21975 21613 21931 21103 21927 21461 21855 21358 21834 21216 21495 21506 21811 21436 21743 21421 21864 21521 21607 21234 21415 21425 21659 21495 21602 21719 22045 21942 21896 21391 21836 21727 21542 21337 21541 21690 21632 21866 21941 21797 21704 21413 21533 21683 21721 21631 21684 21990 21472 22016 21324 21991 21621 22028 58 55 61 2708 4198 5911 6551 7991 8579 9607 33166 28708 25773 25065 23554 23554 22693 22778 21944 22336 21936 22470 21751 22293 21821 22337 21445 22055 21337 21906 21555 22180 21527 22197 21536 22157 21340 22027 21223 22126 21409 22205 21528 22164 21488 22092 21366 21913 21259 22197 21414 22192 21512 22186 21376 22088 21307 21898 21173 21974 21482 22091 21484 21992 21323 22010 21223 22030 21485 22064 21216 21977 21359 22216 21449 22021 21270 21790 20620 21840 21493 22198 21520 22023 21479 21867 21461 21903 21719 21915 21376 21969 21569 22068 21559 21926 21338 21746 21528 21829 21826 21912 21653 21454 21322 21819 21258 21623 21773 21985 21728 21696 21423 22018 21537 21751 21688 21888 21975 22054 21626 21493 21554 21741 21632 21798 21891 21868 21893 21588 22068 21337 22168 21786 22081 21545 22019 21533 21824 21541 21867 21672 22019 21783 21913 21584 21765 21469 21847 21530 22159 21591 22136 21563 21991 21608 21957 21422 21964 21672 22032 21528 22251 21527 22006 21488 22028 21376 22147 21481 22194 21522 22208 21487 22053 21249 22016 21313 22181 21545 22191 21542 22098 21397 21969 21358 22267 21468 22202 21557 22123 64 7830 10610 12899 13063 14884 14862 15732 15642 16491 36612 29216 25824 24960 23279 23477 22317 22771 21844 22430 21668 22233 21530 21739 22093 22353 21572 22284 21457 22294 21948 22224 21294 22130 21368 22084 21851 22083 21512 21955 21603 21656 21360 22021 21774 21806 21793 21947 21501 22096 21644 21733 21580 22001 21736 21857 21708 21978 21481 21642 21945 21626 21504 21970 21541 21895 21565 22093 21738 21794 21463 22071 21454 21639 21755 22176 21539 21529 21751 21893 21463 21520 21739 21554 21249 21255 21917 21431 22145 21456 22176 21597 21952 21608 22133 21687 21765 21673 22029 21621 21842 21588 22050 21539 22029 21674 22049 21381 22183 21504 21866 21636 22083 21449 21872 21617 22212 21341 22026 21569 22127 21372 22073 21610 22137 21272 22076 21626 22124 21292 22354 21519 22236 21288 22142 21452 22213 21424 21928 21432 22198 21526 21965 21462 22140 21542 22161 21317 21906 21498 22279 21388 22087 21348 21989 21547 22120 21379 21766 21413 21920 21405 22065 21317 22094 21293 22059 21401 21763 21198 21925 21600 21760 21989 22056 21511 21902 21577 22073 21385 21984 21479 21626 21331 21968 21558 21988 21463 21657 21393 22093 21482 10569 14727 17057 17321 18426 18561 19154 19259 19633 19826 28888 25017 23980 22958 22569 22498 22663 22049 21804 21680 21680 21783 21975 21995 22058 22025 21848 21704 21785 21646 21665 21598 21774 21863 21894 21637 21811 21447 21828 21853 21560 21913 21479 22317 21460 22145 21501 21741 21408 21612 21760 21845 21925 21948 21873 22067 21581 22091 21496 21904 21309 21952 21320 21893 21600 22088 21587 22208 21637 22183 21645 22157 21557 22145 21584 22193 21423 22081 21445 22000 21397 21968 21346 21956 21319 21952 21287 22133 21158 22178 21399 21840 21454 22098 21515 22173 21533 22193 21584 22206 21560 22300 21540 22284 21255 22096 21386 22092 21339 22017 21606 22024 21492 22016 21429 22098 21382 22054 21333 22067 21456 22211 21419 22156 21429 22065 21196 22259 22055 22161 21431 21479 21672 21456 21876 21549 21517 22016 21450 21911 21825 22076 21420 22080 21573 21931 21357 22038 21549 21960 21626 21927 21671 22080 21777 21953 21687 21727 21573 21774 21415 21780 21634 21683 21557 21608 21650 22071 21580 21677 21352 21772 21450 21805 21686 21728 21666 21639 21860 21765 21715 21941 22096 22163 22135 22294 21712 21559 21905 21756 21987 8488 17840 19120 20123 20148 20716 20609 20931 21076 20969 28305 24533 22705 22508 21890 22115 21521 22138 21548 22016 21573 22097 21619 22096 21469 22128 21577 22132 21586 22039 21578 22149 21636 22238 21611 22219 21569 22235 21582 22251 21468 22151 21414 22118 21622 22057 21220 21981 21305 21943 21386 21931 21354 21958 21452 22024 21415 22123 21463 22215 21393 22129 21379 22061 21413 22063 21357 21968 21426 21934 21375 21985 21193 21971 21074 21944 21205 21921 21355 22201 21139 21931 21741 22182 21398 21883 21597 22049 21524 22036 21527 22107 21601 22004 21971 21912 21461 21981 21469 22000 21554 21982 21448 21938 21615 22053 21628 22113 21671 21959 21526 21867 21620 21474 21448 21877 21660 21603 21447 21840 21434 21858 21697 21895 21785 21869 21959 22168 21981 21992 21925 21911 21754 21973 21621 21622 21542 21864 21713 21808 22045 21613 22385 21712 21987 21721 21992 21803 21928 21745 21985 21512 22054 21666 22023 21521 22008 21446 22047 21597 22061 21499 22003 21427 22114 21240 22088 21474 21499 21548 22343 21879 22043 21440 22095 21504 22102 21480 22263 21544 22278 21472 22222 21493 22140 21427 21998 21285 22039 21499 22153 21588 19392 20397 21584 20906 21638 20844 21933 21079 21817 28509 23597 22146 22144 21555 22084 21521 22182 21332 22076 21487 22130 21325 21709 21623 22217 21465 21954 21325 21464 21654 22263 21204 21978 21330 21808 21772 21954 21521 21930 21577 21909 21623 21831 21842 21937 21336 21863 21792 21824 21459 21797 21752 21570 21488 21754 21911 21647 21516 22177 21577 21585 21671 22086 21393 21601 21728 22162 21467 21725 21655 22112 21506 21817 21629 21824 22140 21639 21909 21217 22125 21587 22100 21545 22055 21732 21772 21375 21895 21652 21968 21819 22042 21606 21956 21544 22164 21457 21753 21428 22132 21561 22119 21401 22169 21573 21970 21424 22112 21642 22167 21385 22199 21532 22184 21346 22056 21401 22361 21484 22012 21227 22187 21607 22107 21440 22071 21536 22169 21429 21985 21254 22112 21372 22166 21288 21975 21311 22034 21527 21928 21248 22021 21255 22104 21596 21899 21299 21991 21287 22018 21513 21696 21593 22002 22168 22140 21512 21802 21188 21868 21460 22019 21499 21720 21446 21888 21495 21971 21442 21879 21574 21728 21537 22208 21669 21542 21554 21911 21619 21960 21943 21797 21447 21566 21575 21722 21956 22085 21589 21751 21473 21611 21612 22038 21867 21858 21535 21180 21440 21671 21402 21722 21879 21328 21972 21488 22150 21542 22043 21634 21891 21480 22007 21815 21953 21692 21952 21494 22113 21575 22171 21605 22000 21723 22097 21431 21891 21544 22121 21568 22106 21454 21959 21347 21875 21476 22172 21525 22222 21486 22096 21303 21952 21571 22218 21555 22216 21497 22089 21385 21901 21754 22118 21691 22173 21480 22199 21396 22125 21323 22016 21273 22117 21472 22185 21396 21581 21328 22082 21707 22134 21432 22114 21243 21937 21252 22220 21274 22231 21778 21856 21784 22002 21255 22245 21497 22103 21299 21795 21713 21939 21400 22016 21916 21920 21504 22085 21670 21971 21565 22063 21372 21833 21517 21692 21645 22004 21830 21626 21792 21810 21718 22020 22071 22023 21355 21577 21767 21713 21776 21975 21856 21588 21504 21654 21702 21840 21994 21831 21653 21715 21644 22194 21768 21661 21991 21319 21789 21520 22163 21719 22068 21679 21661 21465 21801 21660 22175 21524 21867 21385 22144 21543 22167 21668 21925 21457 21907 21522 22045 21568 22172 21472 21972 21335 22050 21589 22192 21634 22140 21362 21952 21426 22188 21545 22243 21399 22072 21240 22054 21546 22185 21567 22084 21386 21962 21407 22232 21536 22228 21447 22104 21249 22057 21431 22037 21483 22079 21415 22024 21696 21987 21376 22141 21562 21991 21120 22008 21220 22055 2479 8480 9813 11801 11799 13069 12861 13901 13893 43366 31380 27943 25660 24281 23597 23242 22630 22448 21973 22320 21728 22044 21541 21781 21974 21975 60 9175 13185 15286 16152 17323 17649 18027 17582 17932 36939 29192 26170 24704 23353 22956 22452 22573 22173 22587 22125 21767 21885 22038 21828 22071 22213 4163 14374 16785 18867 18778 19937 19616 19959 19787 20198 31258 26304 24277 23420 22346 22638 22108 22597 21911 22298 21741 21959 21556 22331 21667 22102 21561 13462 17649 19889 19971 20904 20515 21158 20509 21324 20879 27057 23655 23244 22016 22705 21809 22575 21624 22165 21433 22257 21640 22279 21627 22039 21413 22178 18457 20806 20528 21495 20974 21652 21056 21863 21070 29212 23457 22883 21858 22322 21396 22177 21488 22265 21433 22033 21284 22048 21357 22012 21870 21504 21619 22368 21541 22113 21789 21944 21447 21991 21364 21943 21755 21673 21542 21933 21625 22097 21504 22005 21553 21960 21284 22088 21408 21930 21720 21780 21888 21586 21781 21785 21888 21768 21831 21808 21809 21886 21812 21633 21760 21808 21722 21868 21680 21840 21665 22135 21486 22134 21996 21401 22088 21620 22225 21638 21716 21644 22121 21504 21895 21776 21689 21662 21985 21547 22048 21590 21863 21625 22071 21335 21934 21752 22293 21444 22155 21408 21937 21545 22199 21330 22160 21577 21902 21504 22169 21409 22038 21520 22140 21296 22225 21344 22107 21562 22087 21389 22238 21525 21959 21651 22007 21507 22208 21258 22243 20722 22070 21340 22000 21475 21976 21543 22020 21204 22159 21369 22067 21328 22023 21358 22058 21637 21783 21763 21975 21419 21627 21147 22260 21419 21600 21528 22040 21859 21833 21568 21929 21403 21970 21547 21911 21440 21864 21472 22019 21371 21944 21527 21766 21476 21719 21720 21597 21691 21744 21971 21762 21991 21671 21703 21760 21608 21834 21494 21750 21634 21787 21636 21963 21479 21952 21207 21916 21527 21893 21829 20759 21924 21751 21892 21638 22056 21441 21785 21673 22155 21698 21703 21694 21879 21609 21856 21635 21908 21651 21905 21622 22007 21664 21833 21639 21930 21560 22094 21405 22176 21448 22144 21345 22157 21316 22156 21335 22145 21383 22085 21430 21957 21431 21943 21411 22032 21511 22080 21463 22118 21488 22127 21327 22183 21421 22123 21424 22001 21369 21986 21317 22115 21254 22055 21367 21988 21616 22163 21528 21977 21267 22000 21547 21898 21236 22058 21030 21991 21506 21917 21416 22080 21440 22112 21652 21984 21270 22086 21432 21835 21780 21962 21805 22114 21408 22007 21440 21877 21664 21630 21645 22018 21800 22209 21489 21880 21853 21549 21572 21776 21575 21935 21677 21751 21976 21599 21824 21872 21485 21729 21670 21787 22084 21527 21711 21739 22382 21640 21658 21457 22279 21376 21949 21525 21790 21748 21842 21649 21959 21692 21912 21656 21988 21481 22121 21464 22179 21743 22071 21701 22204 21456 22030 21633 22024 21479 22157 21384 22055 21543 22025 21450 22205 21319 22081 21483 22084 21369 22221 21309 22141 21473 21967 21430 22187 21383 22129 21532 22037 21400 22210 21348 22009 21398 22030 21401 22119 21346 21901 21771 22065 21363 22056 21248 22162 21310 52 6971 11301 12380 12995 14005 14707 14002 15229 14992 36305 29072 26618 24298 24073 22816 10615 14990 17080 17325 18230 18355 18471 18576 19005 37264 28684 26129 24676 23408 23155 12142 16981 18530 19504 19632 19862 20244 20608 20257 39726 28331 24740 23751 23372 22484 12949 18240 19897 19956 20576 21085 20786 20732 21342 21254 26565 24544 22825 22750 22370 15165 19529 20894 21056 21305 21405 21542 21207 21672 21308 25280 22752 23002 22010 22230 21709 22391 21754 22295 21703 22209 21609 22268 21690 22050 21588 22199 21516 21613 21570 22198 21286 22292 21513 22070 21441 22278 21367 22130 21629 22087 21312 22215 21518 22157 21568 22232 21321 22227 21476 22082 21296 22147 21331 22419 21828 21831 21318 22055 21432 22070 21354 22145 21349 22098 21296 22007 21400 21944 21990 22036 21829 22169 21330 21971 21912 21624 21447 22051 21736 21873 21754 21880 21725 22165 21266 21875 21770 21755 21766 21826 21738 22002 21664 21965 21383 21906 21299 21815 21297 21738 21633 21758 21504 21764 21402 21894 21442 21861 21597 21979 21610 21846 21716 22000 22061 21453 21633 21613 22382 21563 22134 21241 22033 
21563 22064 21585 21824 21558 22082 21720 21878 21669 21976 21585 21953 21586 21856 21547 21823 21857 21865 21636 21743 21576 21934 21720 21947 21701 22051 21738 21946 21801 21796 21685 21705 21947 21816 21664 21769 21678 22114 21584 21732 21678 21965 21811 21751 21661 21853 21959 21906 21618 21713 22013 21690 21666 21723 21877 21776 21697 21498 22055 21825 21922 21712 21912 21838 21280 21726 21877 21851 21796 21760 21869 21779 21969 21761 21947 21540 21897 21618 21937 21661 21400 21701 21952 21649 21879 21869 21922 21687 21616 21479 21670 21580 21745 21774 22016 21765 21753 21538 21823 21717 21648 21655 21959 21883 21920 21588 21737 21616 21640 21660 21650 21821 21957 21732 21596 21749 21625 21864 21779 21852 21749 21852 21743 21685 21735 21810 21749 21897 21781 21936 21758 21947 21587 21683 21512 21879 21761 21971 21760 21996 21739 21912 21655 21756 21794 21877 21675 21975 21776 21977 21735 21921 21595 21784 21678 21866 21669 21976 21735 21996 21760 21947 21687 21799 21613 21705 21676 21920 21734 22032 21623 22021 21686 21937 21674 21867 21557 21880 21584 21921 21655 22016 21656 21921 11585 14081 14845 15964 16175 17016 16953 17521 17275 31624 23937 22784 22490 22555 21917 22000 21974 21904 21610 21933 21777 21908 21563 21856 21592 21824 21667 21872 21744 21981 21724 21824 21489 21842 21573 21943 21557 21805 21956 21920 21677 21615 21676 21720 21672 21753 21641 21826 21952 21896 21795 21637 21738 21671 21577 21747 21768 22054 21978 21704 21740 21703 21879 21725 21869 21731 21881 21753 21772 21632 21817 21952 21827 21811 21893 21785 21938 21778 21802 21655 21755 21593 21863 21726 21927 21738 21915 21841 21870 21597 21751 21641 21845 21732 21960 21720 21922 21667 21799 21376 21874 21737 21975 21746 21984 21669 21845 21511 21845 21657 21974 21735 22008 21728 21878 21575 22023 21620 21952 21719 22029 21711 21958 21658 21862 21687 21813 21606 21931 21664 21924 21637 21840 21505 21865 21739 21928 21607 21904 21693 21904 21533 21787 21565 21890 21623 21893 21672 22021 21777 21920 21687 21838 22098 21862 21703 21813 21682 21991 21681 21868 21623 21835 21617 21811 21632 21901 21814 21888 21649 21605 21469 21805 21833 21732 21743 22008 21851 21801 21496 21793 21559 21796 21681 21761 21792 21944 21767 21696 21844 21676 13556 18112 18939 19555 19548 19761 19558 19607 19720 19991 25464 23208 22528 22064 22172 21936 21980 21940 21818 21723 21907 21939 21820 21686 21787 21841 21958 21733 21880 21772 21883 21669 21839 21808 21958 21560 21845 21766 21868 21487 21972 21811 21763 21665 21956 21683 21840 21798 21920 21751 21949 21759 21832 21665 21965 21681 21916 21719 21988 21529 21979 21728 21883 21628 22020 21688 21903 21713 21986 21672 21929 21688 22037 21653 21644 21568 22023 21688 21399 21643 21950 21652 21808 21581 21861 21943 21846 21602 21927 21653 21854 21613 21920 21816 22109 21523 21925 21867 21877 21489 22121 21449 22046 21671 21857 21619 21600 21889 21924 21851 21927 21628 21869 21664 21995 21568 21885 21722 21924 21602 21843 21767 21898 21672 21882 21760 21712 21526 21839 21961 21874 21472 21816 21703 22001 21685 21685 21649 21936 21905 21897 21650 21812 21956 21641 21745 21725 21776 21974 21618 21697 21700 21779 21828 21824 21642 21712 22048 21959 21785 21800 21840 21709 21961 21715 21699 21701 21863 21769 21916 21724 21656 21811 21932 21793 21895 21709 21793 21696 21935 21702 21981 21710 21787 22002 21928 21787 21965 21783 21932 21609 21956 18833 20279 20480 20859 20768 20987 20708 20906 20943 27927 23184 22641 22065 22025 21648 22001 21784 22031 21783 22005 21632 21782 21552 21914 21687 21997 21776 22000 21742 21874 21579 21785 21536 21941 21561 21901 21616 21952 21773 21957 21689 21696 21748 21840 21541 21926 21712 21945 21639 21992 21665 22011 21594 21742 21671 21860 21693 22027 21766 22005 21568 21898 21741 21686 21707 22039 21876 21852 21524 21824 21544 22057 21842 21724 21609 21895 21767 21937 21717 21792 21714 21967 21883 21862 21820 22080 21926 22009 21873 21991 21963 22034 21792 21956 21632 21694 21652 21675 21702 21667 21728 21723 21833 21940 21835 21884 21596 21685 21209 21303 21335 21961 21966 21788 21906 21638 21910 21679 21894 21705 21785 21744 21847 21809 21825 21794 21877 21784 21808 21725 21925 21730 21942 21701 21971 21712 21957 21773 21832 21766 21888 21768 21944 21614 21894 21636 21868 21667 21879 21664 21879 21680 21905 21198 22121 21553 21725 21636 21809 21553 21897 21600 21893 21643 21890 21687 21941 21747 21948 21736 22032 21776 21985 21741 22010 21742 21993 21634 21890 21654 21914 21706 21910 21651 21847 21777 21835 21592 21856 21589 22055 18230 21014 20922 21481 21284 21448 21356 21680 21321 21849 23226 22521 22071 22212 21913 22055 21538 22057 21618 21912 21618 21808 21767 21841 21773 21926 21814 21848 21696 21800 21678 21880 21738 21726 21547 21792 21696 21741 21667 21793 21737 21856 21819 21944 21916 22080 21882 21973 21863 21883 21657 21762 21703 21760 21735 21695 21744 21811 21710 21712 21712 21678 21632 22024 21792 21693 21867 21530 21698 21756 21844 21696 21936 21684 21974 21801 21991 21794 21894 21831 21838 21873 21911 21898 21960 21816 21920 21722 21942 21772 21903 21749 21888 21752 21896 21689 21923 21727 21876 21655 21884 21795 22001 21571 21737 21609 21760 21597 21899 21661 21847 21641 21957 21689 21968 21709 22023 21755 22019 21761 21979 21751 21989 21798 21991 21797 22017 21757 21972 21639 21979 21538 21876 21642 21878 22083 21752 21665 22059 21993 22087 21607 21761 21521 21851 21747 21936 21616 21977 21656 22003 21685 21761 21585 22002 21812 22027 21666 21943 21618 22060 21960 22006 21659 22018 21772 21957 21705 21900 21717 21861 21697 21859 21672 21829 21706 21749 21609 21760 21692 21712 21696 21689 21655 21774 21675 21819 21991 22037 21900 21890 21581 21111 21366 21643 21593 21769 21881 21832 21670 21482 23499 22160 21926 21819 21956 21671 21813 21806 21967 21878 21683 21809 21839 21836 21824 21699 21878 21768 21963 21688 21649 21747 21932 21732 21708 21740 21946 21809 21817 21646 21967 21785 21914 21604 21985 21797 21891 21665 21937 21735 21912 21494 21992 21685 21877 21625 22040 21770 21801 21697 22016 21691 22183 21792 21965 21588 21946 21800 22007 21609 21915 21622 21967 21521 21897 21819 21994 21596 21911 21696 21945 21314 22020 21786 21953 21506 22036 21733 21850 21673 21936 21592 21667 21575 21915 21677 21673 21928 22008 21723 21960 21656 21915 21888 21679 21812 21843 21652 21864 21204 21834 21748 21971 21415 21705 21674 22017 21719 21850 21584 21901 21892 21675 21664 21764 21836 21938 21717 21755 21681 21952 21885 21726 21692 21740 21804 22016 21595 21717 22007 21921 21882 21736 21859 21664 21837 21858 21844 21832 21792 21784 21920 21821 21854 21643 22007 21721 21961 21760 21869 21680 21876 21696 21962 21825 21957 21693 21710 21734 22018 21833 21952 21590 21882 21709 21991 21777 22022 21677 21836 21605 21968 21776 21984 21714 21882 21691 21899 21742 22008 21728 21940 21554 21675 21559 21923 21645 21976 21698 21853 21865 21897 21734 21942 21696 21948 21564 21848 21560 21878 21602 21968 21693 21973 21942 21794 21979 21957 21927 21874 21664 21927 21638 21865 21580 21904 21685 21987 21691 21728 21527 21952 21701 21851 21748 21936 21814 21728 21480 21719 21751 21765 21847 22047 21867 21866 21749 21735 21581 21833 21842 22004 21933 21803 21664 21696 21693 21714 21832 22032 21817 21709 21514 21774 21584 21431 21999 21760 21860 21488 22040 21777 22003 21824 21943 21806 21813 21717 21893 21836 21927 21834 21872 21692 21738 21696 21875 21793 21956 21787 21925 21512 21884 21792 22005 21763 21952 21629 21888 21659 21947 21781 22045 21725 21903 21554 21696 21678 22033 21735 22003 21680 21932 21655 22009 21756 21971 21739 21820 21571 21878 21736 22004 21693 22016 21648 21925 21599 21934 21632 21984 21705 21872 21634 21832 21575 21990 21691 21991 21600 21875 21797 21877 21595 21965 21736 21821 21650 21897 21680 21936 21629 21861 21992 21836 21581 21732 21617 21863 21689 21895 21648 21909 21648 21872 21719 21968 21609 21688 21679 21931 21696 22125 21776 21720 21903 21701 21629 21818 21984 22064 21627 21984 21602 21737 21709 21993 21932 21749 21608 21767 21620 21848 21928 21909 21620 21843 21760 21719 22026 21703 21797 21804 21936 21852 21924 21760 21936 21645 21812 21706 16813 17897 18312 18464 18684 18566 18929 18919 19222 27274 23888 22628 22572 22113 22208 21980 22041 21733 21969 21711 22005 21774 21897 21637 21958 21652 13228 18565 19731 19769 20109 20049 20528 20333 20591 20375 25497 23129 22624 22184 22225 21914 21997 21635 21964 21632 21978 21718 21937 21649 21712 21562 21904 17436 20257 20544 20951 20737 21159 21015 21281 21080 21473 23621 22725 22062 22104 21783 22216 21589 21866 21916 22065 21579 21958 21637 21881 21668 21872 21685 19974 20838 21351 21141 21486 21408 21676 21461 21696 31687 22925 22094 22000 21976 22027 21689 21892 21700 21835 21929 22033 21590 21802 21672 21743 21874 21840 21075 21386 21417 21845 21785 21545 21539 21717 21802 23268 22096 21843 22038 21750 21905 21612 21941 21786 21985 21860 21779 21771 21878 21770 21825 21532 21923 21803 21889 22068 21995 21869 21853 21751 21908 21561 21975 21785 21848 21775 21831 21709 21946 21691 22004 21622 21972 21788 22019 21539 21976 21529 22048 21536 21986 21560 22023 21556 21979 21565 22001 21565 22001 21622 21991 21494 21992 21386 21978 21600 21984 21667 21945 21655 21958 21779 21857 21639 21973 21427 21968 21890 21795 21676 21882 21441 21808 21864 21742 21737 21966 21849 22074 21611 21848 21731 21905 21589 21903 21686 21829 21613 22016 21642 22012 21649 21850 21960 21831 21717 21745 21611 21927 21658 21776 21867 21683 21656 21864 21699 21884 21873 21736 21800 21801 21650 22016 21680 21687 21837 21728 21844 21751 21905 22058 21580 21800 21900 21673 21955 21888 21792 21804 21803 21776 21909 21686 21931 21715 21789 21863 21760 21813 21879 21804 21960 21683 22016 21748 21908 21792 21856 21750 21985 21765 21929 21719 21947 21574 21971 21626 21969 21751 21857 21745 21780 21747 21927 21735 21925 21636 22010 21575 22018 21528 22057 21632 21984 21664 22012 21681 21952 21653 21998 21740 21955 21687 21983 21668 21917 21659 21865 21600 21796 21642 21869 21560 21856 21618 21960 21591 21908 21799 22072 21559 21988 21678 22055 21860 21917 21645 22022 21689 21962 21486 21896 21449 21973 21578 21865 21776 21885 21713 21842 21744 21851 21735 22117 21736 21865 21732 21736 21848 21968 21670 22048 21669 21971 21582 21754 21676 21740 21888 21742 21942 21882 21642 21815 21676 21945 21643 22044 21661 21785 21521 21942 21942 21824 21972 21540 21953 21797 21899 21788 21808 21863 21869 21816 21848 21733 21952 21737 21846 21798 21818 21719 21873 21722 21952 21600 21979 21787 21913 21768 21812 21815 21934 21642 21933 21614 21943 21728 21954 21790 21946 21643 21995 21568 21987 21696 22338 21760 21875 21684 21975 21574 21984 21697 22126 21747 21894 21632 21949 21504 21944 21741 21760 21716 21872 21607 21898 21629 21850 21732 21945 21651 22007 21596 22005 21637 21650 21647 21988 21369 21902 22018 21720 21895 22039 21719 21908 21812 21768 21658 21938 21641 22008 21698 21718 21697 21907 21639 21880 21705 21796 22034 21821 21613 21946 21769 21792 21857 21813 21617 21849 21730 21777 21748 21851 21678 21773 21699 21766 21840 21721 21753 21883 21733 21895 22524 21684 21814 21854 21799 21804 21870 21621 21889 14855 17603 18349 18788 18795 19059 19098 19243 18720 19528 25017 23143 22642 22277 21952 12662 18868 19842 20101 20501 20256 20603 20503 20688 20891 25815 23141 22826 22176 22203 21675 19520 20422 20953 20973 21367 21045 21334 21255 21435 26276 23287 22384 22112 21897 22119 19481 21052 21094 21648 21359 21632 21482 21686 21402 21718 22827 22503 21794 22170 21621 20096 21191 21601 21405 21781 21504 21880 21539 21879 21600 22740 21894 21643 21636 22032 21751 21924 21685 21959 21797 21863 21786 21958 21744 21921 21619 21819 21709 21782 21625 21809 21876 21736 21615 21899 21719 21751 21754 21943 21669 21754 21866 21773 21728 21936 21577 21836 21883 21787 21643 21905 21681 21747 21769 21526 22017 21825 21949 21640 21869 21827 21769 21853 21925 21751 21798 21837 21893 21616 21909 21802 21747 21728 21929 21664 21879 21765 21815 21681 21941 21648 21945 21767 21827 21773 21929 21623 21961 21711 21909 21753 21798 21730 21912 21664 22004 21639 22001 21634 21988 21637 21969 21664 21957 21645 21957 21736 21905 21769 21888 21587 21937 21666 21849 21665 21911 21537 21896 21672 21873 21602 22059 21660 21920 
33696 38776 33853 36192 33484 39040 35462 37124 34828 38071 33824 37744 33800 36586 33444 36582 36842 37031 34267 35812 33577 37703 35399 37952 35249 38819 35760 37857 36309 36054 34992 35153 37953 36401 34531 35712 34955 39507 33768 35354 34945 38146 36423 35912 34777 36908 38145 37344 34215 35142 38755 35152 34583 35456 37143 35751 35003 42901 39377 36544 37479 35184 37333 36801 40532 35777 37141 36957 36089 35479 37132 35975 38004 35680 37976 35396 37076 35943 37504 34294 35524 35408 37956 34520 36200 35676 38013 32992 37972 35812 38240 34376 38215 35878 37455 33943 37952 35932 37664 34071 38470 36170 38054 34075 38299 35732 37244 33920 38915 35632 38170 34035 37989 35553 33939 35709 34329 36821 35945 36841 35821 36831 35923 34978 35632 36201 35792 37242 36009 37569 36065 37986 33920 34844 32704 37124 35637 38144 35569 38456 35846 37348 34716 35821 35964 37156 34980 38253 35795 38236 35784 37449 34105 35824 34951 36945 34800 38072 35784 38464 35595 37968 35184 36232 34297 35152 34809 37296 35626 38459 34530 38471 35084 37632 34883 37061 33536 36987 33645 37354 34732 38210 34604 37396 30073 35784 34337 36116 38512 36064 35308 31168 38591 48840 39220 36253 43566 34168 37546 38393 38294 37248 34197 37729 35882 37287 33717 36592 33833 36176 34736 36837 35568 38378 35571 36252 42784 36880 33693 37825 33555 36253 37888 37424 35043 34336 34784 35248 34666 35773 34380 36311 37740 37216 36192 34353 35548 34841 33650 35629 35675 38915 38366 35196 35633 35217 37232 35627 37145 35577 37200 35888 35843 34064 36338 37682 36585 36352 37221 36064 37668 35872 36208 34664 35900 33941 36966 35613 37697 35701 37568 36666 37182 34132 35840 34382 36672 35480 37898 35392 37432 34784 36214 41368 37236 35685 38288 35734 38116 34849 36697 32946 36623 34630 38117 35776 38519 35427 37129 33811 38528 34304 37648 35545 38732 35591 37957 34696 36899 35113 36327 34085 37686 34580 37432 34402 36410 32677 36841 35776 37524 34262 37075 35242 37113 33287 36017 33679 36941 34456 37139 34758 38480 35920 37339 35149 36704 39338 37099 35328 36340 34837 38440 34944 36982 34459 36621 34177 36240 34084 37314 36425 36960 34448 33997 42661 36649 36628 35480 35873 38519 37028 36251 42883 36304 33606 35929 34827 35544 35885 37749 35937 34880 36527 34873 30560 37282 36525 32749 32506 34745 32710 33234 34256 37460 44274 41312 33435 38757 40389 37742 38367 37812 36504 35558 37351 37836 36553 34997 36082 36601 38002 35664 37080 35877 37325 34816 36811 36144 37976 33492 36642 35767 37035 43120 38384 36440 35735 34593 37809 35015 36442 36168 37364 35936 38016 36197 36491 34625 38133 34928 37454 35520 38264 33207 38221 35408 37299 34449 38350 35035 37468 35280 38199 34808 37587 34992 38698 34679 34408 33280 38518 35040 41971 34776 37973 34528 36067 33848 36864 37965 36831 33957 37621 34634 36883 34333 37277 36369 39704 33176 37482 37173 37205 42832 40074 42615 39248 35029 36741 34292 33728 36952 37528 36983 37760 34485 37080 34552 38475 33504 37248 35481 37466 33998 36615 35885 37236 34780 37147 35540 35074 32961 36706 38071 37088 42535 36601 35312 38400 35090 34928 34359 37475 37331 37300 34457 36186 37888 34472 35573 35552 35687 38156 34247 34912 34997 35863 36425 36278 34401 35015 38642 38200 36128 36102 36496 35378 38016 35414 35088 35100 37024 35843 37504 35532 34497 36257 37728 36080 37329 35421 35972 34883 37888 35223 38368 35462 36096 38389 37664 36200 38199 36166 37714 34212 37764 35031 40583 31764 36155 34904 37706 34547 36620 37323 40420 40736 35008 38967 38728 34440 38373 36002 38857 36193 38600 34196 35880 33192 37332 35147 38553 35803 38324 35880 37000 33863 35938 32962 37675 33600 37300 34096 37650 36021 37986 35125 34832 35612 36474 33264 37481 35168 37836 34544 38251 34709 38694 34051 35690 34853 36782 35232 38672 35872 38582 33515 37137 35840 34965 35269 38817 37175 36886 32960 36133 33200 38825 36723 35488 34107 37219 35915 37658 35451 35880 35204 38252 37426 37007 36520 39074 37750 38723 37141 38542 38263 38674 36022 37862 34163 35088 34396 34843 35099 34678 35235 35480 36552 37700 36769 37261 34039 34896 40072 41258 41608 38227 38267 36151 37267 34385 37344 35138 37168 35256 35977 35524 36847 36260 36405 36023 37168 35952 36115 35572 37598 35486 37796 35232 38116 35200 37949 36032 36490 35757 36935 35725 37751 34369 37136 34268 36967 34760 37216 34553 37204 34764 37216 40088 39913 33536 35484 34184 36147 33314 37141 33856 37113 34552 36983 35141 37780 35823 37897 35604 38472 35804 38230 35886 38626 35897 38440 34292 36978 34592 37402 35266 37376 34576 36791 35842 36693 33846 36589 33893 38912 39058 37894 36973 42816 40861 42532 41814 34990 41013 37019 41312 44231 39637 40776 37686 39130 33240 38868 34291 37265 34195 36020 35860 36588 35984 37600 36440 36711 34928 36050 34976 37053 35655 35562 33411 35768 34876 35712 34710 35943 35625 36669 36571 37777 37589 39117 37353 38247 37170 37376 34688 35528 35253 35460 35667 35281 35494 36298 35383 35065 35068 34916 34009 38348 35979 35200 37084 33133 34873 35828 36640 34912 37517 34922 38135 36304 38519 36112 37209 36708 36776 37043 37570 37328 37976 36407 37369 35481 37792 35910 37520 35853 36938 35772 37147 35087 37528 35752 37045 34713 37196 36157 38429 33724 35536 34101 35400 34049 37286 34820 36807 34424 37904 35121 37888 35445 38628 36072 38504 35707 38338 36004 38387 36262 38500 36279 38400 36105 38073 34544 38292 33192 36916 34427 37085 39244 35926 34600 38995 38536 39514 34352 35530 32852 36773 35781 37541 34104 38155 34597 38487 35098 35552 33686 38324 36355 38714 34733 37863 34241 38952 38056 38676 34856 38328 35939 37960 35304 37256 35428 36919 35054 36864 34743 36473 35227 35747 34126 35384 35056 35084 34853 34974 34627 35877 34930 36489 38521 38864 37424 37100 33920 38976 41744 34771 33872 35702 37206 36524 34785 42704 44482 40280 37808 36616 37901 34967 36331 36360 38321 37253 35003 36164 36869 36661 36312 35122 37114 35749 38134 35014 34386 35661 37688 35529 35232 35622 37852 36299 36448 34560 38240 36105 37466 34048 38150 36249 37178 34658 37611 35758 37350 43008 38633 35107 37126 34410 38626 35892 36215 35003 38231 35251 40389 36094 38192 33861 37768 36176 38717 34272 37496 34380 38226 32992 37123 36593 38454 34100 37435 34957 37818 40986 38641 36136 37840 32727 38476 35683 36786 34857 37512 33883 34624 33687 37467 35045 34756 37496 38597 35657 37911 34588 37508 37015 35136 36224 36712 34480 36816 39972 36759 35724 38128 42245 35490 34803 38328 35587 36772 33641 37303 37149 34982 34455 35556 36633 37680 35443 35926 34848 37664 37441 35640 35056 35607 36240 38279 34155 35280 38674 37572 37285 35565 36887 34534 36686 36821 36679 36504 35910 35898 37354 36631 36984 34551 38600 35544 38017 35566 37141 34763 36992 34932 37990 36480 38000 35277 35352 35537 38368 36690 37761 33947 37125 35405 38468 35913 38528 35088 36593 34111 37841 35769 38103 35307 37184 35201 37328 35840 38529 35431 37682 33389 34848 33512 37453 34612 38071 35094 36914 37029 37302 35632 37792 34981 37864 33657 36609 33449 37041 33968 37836 35266 38156 37888 36087 38357 38074 37831 37088 34555 37651 34433 36929 33792 37048 35033 38304 35261 35286 33157 37585 35226 36878 35723 37541 36437 35328 42640 35776 35896 35728 36857 39095 37253 37045 35840 35680 33842 36494 36624 38500 37924 36408 34544 34816 35142 35170 36450 38485 36538 35382 32845 35797 33592 42164 38968 35620 36824 42688 38961 35941 38557 36387 37955 36448 36400 35381 37175 36680 37752 36663 36933 35106 35616 34873 37064 36045 37877 36199 37632 32816 37111 35947 38598 35820 37720 34592 36870 34758 37931 36037 38963 35708 37512 33378 34816 34901 38546 35801 38545 34828 37656 34744 38592 35995 38144 35840 36467 33638 37042 35554 38438 35317 38248 34393 37528 34261 37728 34151 38040 35302 36868 34208 36400 33779 38280 35261 38460 33936 37040 36204 37162 34101 38093 35613 36559 34422 37184 34772 37504 34585 36887 38362 36748 33896 35357 34118 36968 35090 37268 34336 37324 34357 36832 35506 37904 34229 34856 35028 37723 34983 39863 35872 35303 37460 35219 34480 36352 38144 38976 34608 38051 34023 35536 35342 38405 37824 35860 34024 35758 34181 36610 37576 37474 34249 36621 35512 35440 38568 35380 36140 36232 37575 36901 37543 35550 37546 34615 36208 35171 33896 35424 39552 30848 33370 31911 35962 36194 39155 43466 38434 34707 33877 39458 40604 38479 38924 35702 38016 35562 38548 36069 37260 34393 37897 34517 36875 32091 34443 35047 38834 38180 32314 41083 33661 41460 44804 40581 34679 40232 40978 37686 38669 34418 38001 34162 38164 35462 37650 34478 35085 33461 37039 30225 39884 32576 37137 34652 39439 38051 40598 38696 42712 35584 35764 39136 39600 36242 40669 34095 36915 37544 39064 33975 37888 34432 37140 34720 36839 35024 37189 36016 41509 39448 43107 42096 35143 42499 35184 49560 38577 39650 38480 38256 38805 35182 37044 35093 36660 37703 38665 34007 36115 34713 35825 36997 36522 38518 41768 42363 37020 36072 33298 33045 35232 36179 41648 39508 36870 38792 35900 37266 34231 37728 36073 38247 36931 35960 35904 37159 35840 36391 33181 37443 36386 37072 38998 38672 37271 37008 35940 37298 33583 38186 36099 36698 36088 36659 35393 37836 35232 38446 34406 38016 36111 38506 33334 38009 33178 38563 33094 38094 33524 38536 33483 38236 33799 38338 33793 38344 34400 38419 43056 38638 41834 38497 33937 38032 34817 37824 34746 37914 36008 36796 34488 38119 42279 38200 37164 36164 34872 37152 42242 36394 36922 35820 35622 38156 36904 39243 34413 36610 35564 37240 33928 37417 35049 36490 34312 38192 34496 38578 34530 36729 37912 36737 35408 35597 34229 37643 34688 35627 37096 34977 34456 36823 35147 37206 37070 35560 36082 36215 34414 38192 34824 35042 36704 35340 36608 35920 37216 39045 33904 36001 37304 34872 37889 37016 35960 36248 36337 35706 37400 35030 37739 35398 36144 37063 35538 36341 37285 36309 37940 35024 38235 35768 37296 35961 36691 35817 38216 35848 37659 35553 37946 33739 38050 34440 37971 35985 36805 35672 35828 35732 37707 35763 37597 34304 38543 33889 38285 33088 38873 34201 38048 34592 38624 34950 37677 34624 38524 35776 37936 35185 38464 34770 37556 34794 36951 33863 35941 34387 37074 33470 36573 34185 37830 34077 37206 36328 39104 33728 38171 35073 39008 36965 37661 34629 38470 35153 37989 43044 37456 42490 38468 33827 36901 35747 37351 35280 36560 35559 36890 35730 39650 35685 36992 35513 35484 36678 37943 34856 38624 34886 38096 33975 35745 34848 35608 36920 35814 37814 37270 34451 36401 34884 37813 34592 38768 34916 35961 32870 37681 37880 36361 38092 33234 37719 36227 37387 36112 36116 37059 37207 36364 36724 35588 37704 35708 36736 36192 36422 35500 36992 35461 37702 33897 38263 36216 37484 35761 36258 36500 37830 34466 37750 34360 37862 35394 37797 36236 37881 34585 38489 33506 38227 34998 41696 35738 37120 34920 38253 33752 38021 35101 39832 35920 37197 34122 37937 32631 37612 35853 35517 35227 36875 34231 37174 34565 36738 35495 37856 34600 38633 34091 38503 34458 34340 34571 38208 41782 37663 38465 35448 37297 38914 35613 37276 36320 35696 34596 37598 34464 38464 35120 35316 34981 37322 34516 37037 35259 36002 38592 36680 34332 37800 35884 35888 36809 36406 34168 36720 35450 35776 35675 36893 35013 35907 35115 35692 36481 35440 35827 37307 35636 37287 44058 35234 36338 36964 36326 36260 37184 34349 36997 34343 32115 40027 34720 34762 37545 38006 39608 33836 32249 39256 40625 34995 41182 37955 31074 35202 35718 38641 32174 39862 33672 32024 33934 36425 38160 40448 36995 40151 40928 35072 32151 41783 37504 37660 41784 38435 41328 40608 42604 43238 42408 42624 39760 37426 39897 31965 38086 38829 34429 41624 34340 42679 35289 41817 35648 36920 43821 36355 40246 34509 38322 39972 34126 41907 36224 32534 36941 33250 37138 33866 35780 37190 34568 34155 38390 36009 37489 35044 38038 36248 37075 36060 37952 35623 37441 34330 36459 35387 35920 34359 36144 37050 35568 34391 37288 35541 35872 35845 37912 34855 35785 36992 36016 35328 37523 33804 36513 37357 36176 34519 37196 34894 35693 35785 33000 38247 36489 38040 34369 37088 36552 35824 36941 37656 35969 36160 36740 37240 34100 37335 36262 35755 35301 37637 34584 37200 35796 36480 34849 37769 34369 37800 35936 36512 35971 37665 34490 37972 35560 37389 35907 36155 35434 37325 34552 38411 34563 38384 34293 38199 34419 37969 34586 37923 34635 37924 35602 37251 35846 36945 33864 37564 34680 36737 34647 37462 33173 37018 34752 36951 33972 38982 34800 37300 
24243 23709 24132 23913 24320 23825 24370 23755 24224 24314 24326 23947 24326 23751 24104 23954 24259 23799 24048 23912 24293 23800 24219 23649 24270 23965 24219 23886 24217 23901 24379 23920 23968 23655 24085 24267 24034 23858 23872 24135 24238 23952 24328 23959 24273 23865 23985 23918 24309 23964 23916 23803 24240 24077 23978 23685 23925 24183 23831 24128 23900 24336 23922 24035 23938 24225 23971 23953 24068 24188 23473 24008 23931 24281 23822 24113 23821 24232 23789 24083 23956 24187 23691 24267 23982 24183 23713 24228 23960 24332 23833 24248 23880 24119 23787 24263 23833 24041 23803 24320 23814 24143 23885 24245 23809 24114 23818 24332 23880 24056 23673 24329 23708 24172 23756 24256 23684 24096 23703 24123 23910 24157 23947 24210 23715 24197 23607 24036 23797 24216 23662 23794 23735 24119 23633 23840 23565 24153 23724 24184 23933 24033 23835 24023 24000 24189 24038 24010 23848 23367 23836 23581 23959 23585 24056 23552 24031 23533 23958 23448 23805 23383 23907 23557 24021 23657 24039 23656 24070 23557 24001 23420 23982 23561 23894 23703 23873 23608 24071 23613 23991 23576 23818 58 9497 11005 12409 12530 13790 13843 14737 14469 15529 34080 29288 27185 26615 25622 25660 25117 25287 24745 24939 24590 24947 24584 24614 24391 24447 24471 24548 24288 24450 24256 24396 24092 24448 24355 24400 24295 24448 24198 24151 24253 24033 24097 24031 24187 24313 24254 24365 24014 24089 23751 24133 23902 24067 24192 24266 24105 23954 24014 23964 23842 24089 24132 24135 24171 23886 24088 23769 24228 23877 24244 24077 24251 24056 24220 23917 24103 23861 24093 23912 24170 24005 24265 23911 24168 23907 24114 23740 23996 23870 24225 23912 24364 23929 24264 23837 24164 23712 24211 23927 24300 23894 24257 23845 24176 23616 24265 23803 24307 23845 24306 23849 24160 23655 24388 23839 24238 23931 24288 23883 24253 23744 24169 23677 24184 23716 24192 23863 24306 23846 24188 23723 24100 23701 24151 23816 24205 23700 24237 23523 23971 23644 24309 23535 24268 23633 23878 23591 24151 23748 24252 24135 24042 23926 24195 24064 24239 23933 24178 23860 24033 23721 24150 23801 24094 23885 24221 23948 24013 23719 24087 23925 24089 24056 24169 23991 24027 23596 23974 23823 23939 23908 24076 24160 24282 24009 23955 23525 23884 24028 23986 23997 14669 16775 17454 17772 18625 18676 18842 18804 19433 19530 28599 26576 25721 25787 25176 25321 24674 24985 24763 24818 24545 24493 24361 24577 24407 24506 24189 24520 24336 24589 24051 24497 24269 24483 24152 24507 24218 24289 24081 24487 24038 24274 24096 24468 23850 24380 24087 24283 23952 24437 23997 24396 24016 24439 23865 24348 23969 24334 24035 24487 23932 24169 23968 24391 23828 24297 24010 24335 23796 24297 24012 24341 23744 24326 23940 24321 23773 24288 23792 24353 23776 24233 23879 24340 23940 23862 23847 24268 23829 24205 24023 24366 23708 24151 23734 24381 23748 24235 23965 24276 23845 24288 23873 24045 23831 24328 23767 24024 23829 24375 23972 24102 23911 24196 23383 24174 23905 24132 23810 24192 24140 24115 23799 24203 23941 23949 23990 24120 23980 23940 23901 24017 24192 24158 23662 24071 24057 24214 23884 24014 23978 24302 23968 24237 23809 24185 24124 23981 23879 23992 24037 24192 23899 23821 23799 24176 24151 23590 24231 24176 24303 23965 24073 23904 24196 23937 24214 24050 24033 23858 24030 23992 24164 24055 24108 23688 24229 24008 24253 23975 24123 23665 24662 23954 24225 24000 24212 23853 24018 23835 24244 11320 18999 19681 20391 20300 20672 20763 21320 21060 21468 28741 26304 25109 25290 24715 25110 24452 24892 24290 24537 24024 24615 24243 24604 24202 24563 24102 24425 23957 24293 24016 24512 23927 24465 23956 24448 23965 24321 23969 24289 24045 24233 23947 24157 23943 24417 23836 24333 23804 24352 24017 24182 23707 24292 23725 24278 23929 24158 23764 24453 23979 24384 23663 23925 23915 23949 23831 24119 23815 24167 24029 24195 23884 24178 23853 24171 24013 24243 23946 24283 24007 24224 23978 24006 23867 24067 23853 24087 23745 24017 23809 23931 23904 23979 23881 23912 23809 24066 23910 24037 23790 23990 24034 24009 23825 23944 23876 24039 23883 24009 24080 24015 23994 24151 24248 24086 24326 23916 24349 24069 24172 24007 24140 24024 24128 23995 24182 24088 24159 24050 24276 23893 24192 23886 24268 23917 24275 23928 24250 23968 24209 23934 24258 23925 24306 23929 24257 23908 24272 23941 24356 23927 24279 23895 24368 23888 24277 23900 24258 23795 24253 23767 24263 23718 24186 23321 23881 23936 24036 23662 24078 23671 24123 23718 24167 23785 24154 23753 24244 23808 24256 23822 24267 23766 24203 23783 24105 23833 24225 23751 24184 23735 20033 20873 21855 21527 22260 21868 22376 21726 22373 32040 25826 24833 24768 24183 24409 24137 24592 23982 24338 24053 24387 24096 24393 24020 24253 24230 24234 23922 24252 23881 24205 23881 24151 23981 24110 23893 24063 24004 23992 23863 24049 23810 23726 24133 24117 23861 23937 23896 24161 23965 23978 23917 24160 24257 24172 24088 24251 24252 24215 24084 24204 23890 23966 23984 23868 23869 23869 23954 23821 24066 23960 24032 23677 24149 23843 24006 23898 24128 24032 23985 23901 24140 23889 24111 23864 24243 23928 24215 23937 24268 23900 24238 23891 24288 23972 24180 23888 24280 23877 24286 23900 24243 23943 24308 23877 24229 23896 24186 23811 24192 23795 24224 23936 24117 23758 24182 23585 24074 23684 24126 23787 24165 23808 24180 23826 24278 23785 24269 23813 24296 23748 24282 23732 24153 23840 24167 23940 24261 23774 23936 23898 24180 23651 24273 23729 24131 23557 24192 23660 23941 24023 24111 23811 24057 23804 24169 23619 24352 24052 23838 23431 23895 23851 24032 23847 23943 23748 23887 23679 23936 23712 23984 23530 24016 23810 23949 23829 23894 23795 23866 23832 23921 23882 24130 24105 24198 23868 23952 23837 23877 23920 20012 22357 22914 23174 23201 23017 23007 23056 23047 23100 25708 24699 23968 24393 24042 24281 23977 24258 23823 24259 24034 24232 23978 24006 23928 24101 24019 24115 23726 24118 23923 24232 23724 24251 23962 24216 23821 24096 23860 24225 23825 24069 23766 24251 23881 24114 23767 24277 23830 24093 23757 24293 23822 24155 23797 24345 23713 24237 23861 24250 23671 24180 23895 24199 23754 24215 23822 24185 23641 24295 23767 24183 23676 24175 23909 24050 23761 24231 23904 24066 23744 24132 23769 24080 23671 24306 23637 24240 23491 24225 23628 24068 23814 23764 23818 24064 23808 24229 23736 24056 23828 24155 23800 24020 23792 24064 23792 23947 23740 24117 24003 23895 23860 23917 24032 24068 23813 24036 23822 24135 23873 24023 23719 24101 24085 23853 23824 23958 24087 24035 23868 23838 23778 23978 24098 23731 23701 23898 24226 23756 24112 23788 24214 23876 24153 23872 23957 24098 24044 23985 24192 23888 24025 23836 24196 23868 24231 23783 24069 23925 24090 23899 24240 23847 23997 23619 24144 23851 24249 23792 24016 24017 24192 23847 24206 23809 24126 23712 24132 23757 24307 23803 24145 23615 24481 23758 24258 23864 24210 23705 24143 23728 24297 23655 24200 23779 24128 23666 24113 23762 24067 23792 24005 23744 24232 23603 24075 23918 24252 23623 24242 23615 24061 23944 24133 23730 24162 23725 23986 23930 24152 23834 24046 23801 24153 23767 24012 23784 24028 24000 24065 23751 24074 23712 23921 23905 23992 23776 24087 23861 24141 24055 23945 23570 24025 23945 24008 23941 24103 24122 23884 23702 24148 23787 23899 23931 24229 23978 23837 23729 23880 23712 23864 23985 24162 24017 23661 23847 23745 24128 23884 24193 23976 23997 23792 24188 24007 24122 23973 24047 23863 23884 23303 24078 23931 24195 23913 24088 23629 23924 23844 24212 23821 24230 23727 24161 23757 24123 23833 24277 23826 24171 23696 24157 23708 24243 23799 24224 23732 24086 23767 24173 23812 24237 23776 24157 23627 23885 23819 24193 23866 24204 23729 24023 23512 24161 23681 24176 23780 24192 23626 24148 23640 24082 23650 24141 23821 24080 23453 24073 23769 24130 23706 24208 23736 24020 23697 24247 23784 24195 23767 24106 23415 23842 23591 24121 23783 24078 23667 24247 23865 24099 23967 24133 23700 24019 24007 23966 23868 24109 24084 23853 23592 23943 23920 23895 24029 24169 23838 23809 23788 23963 23737 23996 24090 23975 23718 23833 23858 23991 24016 24095 23786 23822 23863 23905 23926 24118 23887 23779 24128 23801 24112 23921 24165 23851 23808 23627 24016 24001 8192 13194 14481 14898 15755 15843 16404 16403 16935 16709 31657 28005 27116 26169 26023 25413 25387 25083 25245 24819 25105 24592 24844 24171 24872 24506 24800 14737 17787 18269 19248 19187 19918 19599 20089 19739 20517 28567 27097 25991 25891 25142 25245 24897 25251 24720 25143 24531 24775 24379 24821 24248 24823 24380 18510 20032 20878 20771 21456 21287 21688 21241 21684 32668 27055 25767 25706 24951 24843 24536 24890 24525 24900 24344 24462 24177 24688 24315 24722 24278 24583 20711 21888 22034 22452 22291 22608 22416 22644 23024 28248 25760 25130 24782 24727 24663 24589 24342 24665 24458 24272 24176 24263 24171 24520 24215 24199 20250 22770 23075 23218 23040 23253 23149 23406 23531 23290 25796 24612 24824 24393 24495 24222 24456 24199 24456 24088 24224 24199 24375 24148 24136 24082 24418 24075 24257 24088 24463 24064 24184 24056 24295 24059 24469 23945 24354 23985 24265 24041 24307 23956 24363 23945 24414 23712 24408 23734 24407 23806 24442 23729 24408 23777 24438 23817 24392 23800 24391 23790 24375 23801 24398 23828 24387 23688 24339 23866 24345 23947 24260 23787 24150 24151 24009 23882 24276 23715 24265 23761 24195 23684 24166 24101 24347 23730 24218 23884 24184 23890 23794 23889 24161 23901 24192 23804 24234 23896 24250 23895 24155 23840 24178 23800 24192 23824 24238 23877 24064 23865 24071 23925 24181 23819 23997 23994 24055 23965 24142 23921 23894 24135 24119 23972 24276 23960 24014 24021 23848 24122 23988 23843 24252 23958 24089 24101 23187 24200 23874 24038 23897 24099 23953 24167 23900 24245 23949 24235 24000 24066 23968 23843 23900 24187 23850 24243 23553 24227 23867 24119 23944 24058 23987 24156 23924 24200 23804 24291 23872 24267 23799 24167 23936 24096 23876 24294 23860 24210 23792 24320 23691 24312 23657 24300 23845 24283 23805 24281 23799 24282 23784 24231 23801 24248 23724 24208 23707 24182 23691 24184 23723 24074 23837 24265 23796 24215 23664 24201 23663 24199 23652 24180 23959 24200 23744 24228 24034 24173 23524 24208 23617 23918 23762 24161 23779 24122 23767 24072 23936 24115 23971 24096 23752 24053 23962 23964 23859 23994 23881 23880 23836 24088 23793 24132 23900 24259 23765 23953 23939 23941 24083 23890 24173 24251 23892 23943 23917 24144 23858 24262 23989 23959 23936 23814 23989 24069 24166 23923 24287 23720 24169 23907 24087 24012 24050 24009 24144 23876 24156 23757 24072 23946 24087 23933 24069 23881 24279 23847 24285 23799 24169 23865 24012 23796 24104 23779 24232 23649 24262 23875 24178 23815 24105 23760 24240 23625 24295 23697 24186 23831 24095 23782 24175 23553 24267 23767 24133 23808 24072 23757 24294 23591 24209 23824 24087 23716 24065 23657 24142 23744 24123 23786 24088 23740 24183 23779 24312 23712 23700 23755 24192 23759 23772 23619 24105 23782 24167 23708 24156 23805 24044 23826 24054 23908 24178 23641 24050 23847 23885 23842 24167 23675 23907 23854 23855 23804 24157 23773 23980 24167 23886 23782 24084 23747 24040 24161 23904 23641 24231 23768 23933 24125 23856 23773 24172 23737 23991 23950 23625 24231 23840 24071 23951 24183 23869 24116 23829 11850 14128 15157 15479 16343 16492 16886 16865 17418 37047 29580 27308 26669 25866 25988 15523 19040 19207 19928 19752 20357 20071 20386 20201 20755 28728 27171 26140 26039 25333 15462 20033 21359 21304 21959 21443 22124 21804 22109 21783 28967 26220 25914 25318 25579 24840 21719 21991 22769 22368 22980 22625 22952 22592 23125 28432 25909 25014 25254 24636 25017 22383 23584 23164 23602 23355 23527 23338 23378 23286 23411 25344 24861 24557 24515 24421 24562 24276 24399 24307 24592 24356 24455 24134 24528 24036 24380 24208 24280 24250 24405 24212 24273 24221 24499 24007 24279 24264 24134 24189 24378 24338 24117 24205 24271 23971 24135 24238 24067 24120 24348 24145 24013 24323 24194 23794 24293 24142 23901 24420 23994 24166 24087 24225 23886 24240 24151 24170 24095 24330 23966 24196 24038 24344 23857 24362 23959 24116 24077 24340 23798 24372 23991 24221 24015 24337 24032 24355 23925 24271 23968 24144 23996 24284 23937 24344 23856 24391 23831 24366 24195 24420 23904 24337 23868 24341 23911 24296 23972 24279 23900 24233 23847 24514 23898 24267 23852 24302 23824 24359 23906 24173 23812 24175 23824 
22225 22321 22359 22487 22573 22391 22152 22455 22289 22568 22207 22264 21954 22607 22298 22720 22058 22467 22050 22665 22094 22646 22016 22507 22133 22743 22123 22606 21893 22650 22144 22658 21748 22583 22038 22803 22016 22488 21980 22784 22140 22985 21908 22607 22120 22577 21843 22658 21979 22695 21847 22642 21987 22486 21917 22546 21967 22469 22074 22647 21879 22560 21883 22455 21820 22421 21674 22849 22032 22615 22091 22445 22102 21743 21836 22544 22069 22390 22108 22561 21976 22261 21907 22256 21915 22363 22115 22175 21984 22404 22219 22292 22075 22468 22199 22202 21941 22447 22183 22133 21921 22411 22113 22235 22048 22647 22282 22340 22082 22448 22456 22222 21785 22249 22477 22394 21763 22132 22216 22057 22676 22135 22337 22292 22415 22081 22045 22072 22379 22248 22574 21898 22491 22247 22407 21888 22532 22072 22471 21690 22248 22121 22625 22038 22467 22097 22712 22019 22361 22054 22601 21962 22352 22064 22638 21910 22400 22016 22688 22032 22459 22039 22616 21723 22380 22037 22604 22054 22416 22057 22520 21801 22485 21911 22531 21907 22544 21881 22712 21844 22493 21995 22137 21960 22535 21723 113 78 79 74 73 73 73 25033 24081 23712 22552 22528 21760 21953 21510 21581 20929 21172 20687 20832 20196 20552 20179 20749 20184 20679 20012 20521 19876 20279 19763 20761 19776 20470 19784 20557 19714 20273 19600 20204 19466 20232 19731 20309 19870 20329 19718 20276 19441 20167 19778 20237 19629 20168 19719 20299 19667 20254 19675 19656 19541 20289 19792 20141 19660 20296 19584 20348 19521 20349 19525 20247 19801 20351 19717 20584 19528 19729 19704 19585 19662 20241 19753 20003 20099 20352 19937 20203 19784 20183 19820 20231 19907 20342 19760 20224 19901 19946 19788 20214 19975 20347 20133 20320 19893 20048 19964 20211 19971 20490 20413 20455 19889 20154 19987 20105 19971 20311 20238 20344 20543 20384 20011 19559 20058 20340 20277 20623 20329 20224 20123 20008 20439 20253 20484 20177 20439 20215 20213 20123 20300 20263 20344 20269 20529 20325 20633 20183 20621 20107 20460 20509 20456 20424 20736 20237 20647 20279 20572 19962 20602 20140 20773 20257 20853 20214 20651 20079 20645 19943 20727 20279 20933 20216 20902 20111 20659 20044 20770 20201 20862 20322 20866 20355 20785 20138 20695 20154 20843 927 3051 3109 4564 4491 5597 5239 6165 5991 27620 26890 26454 24832 24646 23577 23945 22887 23263 22075 22636 22076 22477 21668 22135 21431 21945 21300 21703 20912 21831 21065 21550 21005 21628 21051 21159 21001 21389 20728 21399 21121 21432 21031 21207 20830 21216 21216 21312 20744 21276 21120 21203 20777 21218 21194 20912 20456 21262 20975 20881 20939 21410 20664 20880 21075 21189 20588 20928 21122 21092 20675 20935 21047 21016 20891 21008 21089 20993 20768 20839 20936 20817 21163 21132 21164 20825 21203 20775 21271 20800 20934 20875 21238 20668 20976 21108 20936 20733 21109 20916 21026 21312 21253 20783 20994 20791 21353 20764 21063 20930 21214 20505 21194 20834 21143 20504 21437 20806 21032 20710 21404 20829 21101 20721 21403 20839 21129 20679 21441 20795 21182 20449 21429 20717 21333 20598 21321 20860 21369 20626 20955 20880 21376 20793 21120 20730 21491 20782 21328 20535 21408 20660 21384 20753 21217 20648 21235 20788 21240 20769 21219 20676 21237 20797 21275 20525 21197 20635 21304 21223 21316 20589 21173 20869 21463 20903 21241 20624 21436 20766 21304 20944 21481 20629 21208 20687 21120 20868 21381 21105 21037 5575 7719 8603 9926 10040 10994 10905 11377 11799 12279 27464 26824 25319 24886 24081 23452 23157 22880 22728 22955 22581 22346 22064 21957 21723 22145 21628 21972 21779 22042 21532 21578 21274 21659 21432 21606 21455 21548 21860 21916 21331 21097 21559 20738 21642 21303 21785 21309 21603 21408 21643 21238 21563 21194 21284 21328 21551 21221 21628 21332 21762 21255 21666 21116 21536 21147 21565 21022 21464 20975 21530 21057 21426 21195 21635 21105 21602 21207 21715 21180 21798 21200 21721 21188 21760 21142 21795 21077 21818 21046 21733 21088 21577 21055 21568 20969 21484 20987 21417 20891 21415 20867 21614 20815 21652 20950 21651 20875 21693 20904 21755 21044 21653 21001 21260 21161 21361 20920 21494 20852 21457 20967 21523 20828 21435 20653 21075 21121 21149 21090 21253 20746 21713 21071 21559 21147 21158 20976 21590 21045 21504 20985 21322 20926 21513 21058 21494 21163 21402 20861 21262 20525 21513 20866 21222 21116 21098 21216 21089 21326 21397 21167 21636 21392 21792 21472 21542 21568 21617 21589 21821 21581 21543 21440 21587 21316 21413 21314 21362 21202 21156 21377 21328 21139 21013 21831 21230 21511 21372 21705 20953 21397 11618 13296 13739 14608 14945 15512 15581 16101 16116 26883 25652 24993 23908 23847 23144 23229 22666 22837 22355 22567 22185 22423 21888 22252 21828 22154 21617 22053 21505 22039 21672 21832 21360 21895 21371 21870 21195 21813 21200 21895 21287 21899 21301 22064 21384 22002 21415 21972 21421 22012 21389 21984 21434 21995 21443 22035 21393 21975 21276 21847 21133 21782 21473 21814 21121 21771 21293 21570 21645 21918 21291 21793 21205 21897 21278 22085 21365 21776 21197 21975 21260 21808 21303 21772 21180 21848 21799 21929 21816 21429 21178 21565 21150 21693 21141 21674 21168 21747 21356 21329 21171 21568 21077 21623 21126 21412 21179 21581 21337 21392 21385 21719 21684 21741 21816 21809 21749 21826 21683 21565 21449 21546 21365 21493 21590 21509 21223 21657 21285 21349 21152 21602 21403 22038 21241 21462 21324 21348 21671 21462 21392 21079 21445 21057 21623 21228 21728 21479 21710 21448 21671 21422 21580 21325 21701 21319 21724 21319 21785 21424 21815 21459 21811 21369 21878 21463 21938 21349 21895 21418 21863 21386 21863 21297 21850 21200 21747 21143 21731 21050 21799 21282 21868 21340 21994 21401 22004 21412 21848 21351 21776 16041 17743 17611 18723 18267 19168 18731 19456 18894 19041 23858 23741 22788 23063 22144 22674 21916 22416 21628 22061 21450 22183 21569 22204 21327 22003 21373 21928 22101 22040 21344 22121 21516 21610 21353 21829 21499 21989 21316 21848 21460 21917 21469 21672 21366 22016 21428 21862 21863 22062 21234 21523 21525 21947 21397 21675 21470 21825 21472 21632 21787 21617 21400 21809 21991 21701 21454 21703 21777 21442 21341 21829 21556 21424 21622 21854 21522 20919 22112 21536 21680 21583 22026 21553 21547 21614 22027 21412 21144 21660 21840 21425 21768 21632 22017 21417 22024 21637 21878 21392 22021 21528 22066 21370 21966 21472 22016 21460 21795 21442 22075 21504 21919 21079 22119 21502 21996 21171 22016 21511 22040 21372 21890 21407 22082 21551 21851 21527 22087 21549 22147 21305 21832 21274 22066 21405 21973 21344 21973 21810 21944 21467 21848 21382 21820 21445 22034 21578 21788 21409 21796 21568 22067 21290 21988 21235 21860 21980 22049 21412 21959 21802 21842 21412 22019 21517 21849 21155 21949 21496 21931 21504 21805 21684 21635 21459 22000 22040 21890 21437 21556 21596 21671 21824 21764 21628 21836 21421 21607 21916 22192 21665 21543 21609 21595 21613 21968 21881 21826 21449 21616 22138 21893 22020 21423 21900 21357 21594 21652 21874 21781 21915 21635 21591 21768 21995 21748 22087 21607 22016 21470 21748 21595 21987 21753 22035 21536 22080 21499 21835 21397 22039 21578 22149 21603 22022 21397 21828 21460 21988 21504 22249 21539 22172 21429 21976 21427 22008 21575 22186 21629 22060 21504 21888 21566 22065 21555 22241 21369 22124 21432 21902 21627 21923 21371 21985 21499 22187 21568 21891 21423 21919 21328 21979 21416 21917 21405 22001 21387 21751 21339 22054 21961 21806 21675 21921 21579 22085 21470 21952 21425 21893 21424 22001 21705 21909 21702 21626 21645 21920 21582 22101 21760 21984 21303 21613 21876 21653 21607 22107 22007 21791 21793 21610 21634 21824 21812 22146 21622 21686 21774 21736 21719 21911 21889 21833 21412 21867 21465 22055 22108 22039 20971 21532 22005 21672 22024 21656 22071 21478 21655 21675 22097 21796 21940 21680 21719 21539 21968 21628 22151 21718 22037 21510 22080 21585 22123 21820 22063 21639 21877 21592 22020 21666 22209 21624 22071 21363 21888 21598 22144 21723 22167 21487 21934 21374 22171 21595 22254 21613 22045 21329 22115 21607 22199 21677 22232 21469 22009 21719 22240 21433 22142 21447 22199 21256 22067 21715 21954 21550 22096 21388 21972 21421 22227 21364 22250 21779 22208 21060 93 79 2107 2560 3797 3753 4848 4570 5655 5511 31491 29817 29080 27656 27329 26440 25940 25312 25286 24506 24615 24140 24308 23723 23799 23277 23597 4121 6937 7911 8860 9123 9844 10184 10760 10965 32086 31037 29408 28154 27324 26616 26631 25657 25132 24720 24682 24280 24630 24136 23680 23727 23588 24103 9447 11415 11843 13235 13463 14575 14437 14976 14923 30836 28919 27945 27021 26418 25449 25335 24406 24567 24075 24430 23864 24129 23391 23657 22860 23552 13192 14594 15064 16173 16237 17344 17235 18067 17711 18331 27848 27589 25627 25664 24529 24656 23593 24424 23542 23949 23230 23553 22808 23375 23004 23433 22766 17924 18004 19495 18984 20138 19596 20135 19662 20519 20018 25435 24124 24264 23355 23758 22903 23420 22680 23255 22540 23102 22368 22820 22528 23223 22494 22759 22523 22965 22285 22823 22305 22669 22545 22729 22548 22755 22272 22685 22141 22839 22244 22644 22103 22500 22329 22435 22231 22391 22503 22430 22247 22219 22593 22178 22465 22493 22514 22040 22630 22065 22482 22152 22493 22279 22311 22267 22183 22040 22224 22352 22143 22501 22528 21754 22288 21959 22731 22039 22576 22080 22251 22247 22341 22086 22518 22223 21997 22283 22500 21824 22603 22041 22332 22116 22490 21975 22407 22080 22430 21897 22582 22016 22221 22007 22480 21933 22528 22117 22576 21862 22592 21905 22380 21954 22479 21744 22653 21760 22342 21943 22485 21841 22592 21881 22424 21969 22372 21976 22613 21752 22633 21703 22492 21816 22331 21841 22320 22064 22444 21796 22387 21725 22314 21711 22087 22083 22450 21924 22540 21613 22711 21425 22373 21824 22176 22007 22316 22404 22452 21768 22282 21908 22421 21779 22240 21932 21960 22144 22204 22019 22360 21661 22317 21806 22375 21847 22215 21760 22156 21928 22006 22224 21975 22177 22139 22054 22133 21819 22070 21959 22305 21691 22144 21618 22115 21767 22295 21774 22401 21730 22229 22322 22030 22605 21997 22666 22132 22183 21973 22150 22032 22067 22007 21909 22077 22103 22136 22048 22039 22095 22029 22279 22069 22241 21953 22413 21996 22375 21945 22499 21776 22420 21676 22485 21730 22477 21705 22496 21837 22314 21904 22125 21911 22190 21885 22339 21831 22395 21816 22464 21688 22472 21728 22488 21824 22401 21832 22233 21800 22326 21735 22378 21751 22336 21616 22485 21677 22241 21765 22312 21769 22261 21696 22509 21722 22487 21602 22406 21570 22450 21872 22006 21592 22195 21374 22404 21864 22380 21834 22170 22172 22177 21696 22355 21837 22133 21591 22116 21787 22219 21969 22167 21766 22443 21763 21944 22186 21897 21684 22151 21805 22492 21816 22176 22092 21851 22102 22183 21812 22449 21820 22087 22357 22116 22091 22245 21777 22185 21744 21902 22371 21643 22453 21804 22145 22120 22158 22017 22395 21959 22086 22005 22167 21940 22327 21773 22330 22009 22235 21820 22330 21729 22466 21927 22160 21933 22365 21665 22394 21958 22190 21901 22397 21646 22437 21867 22215 21885 22439 21688 22489 21857 22213 21935 22436 21632 22389 21911 22218 21863 22560 21616 22528 21784 22167 21737 22400 21624 22337 21824 21973 21552 22371 21831 22262 21613 21957 21760 88 1406 3597 4025 5131 4861 6567 6119 6628 33692 32221 30492 29334 27737 27148 7008 9163 9808 10842 11076 11949 12340 12649 12342 33720 32347 30872 29396 28901 27483 11768 13164 14375 14785 15543 15943 16325 16157 16789 16964 31654 29559 28672 27157 26850 17149 16585 17316 18281 18391 18828 18958 19437 19122 19111 29693 27872 27296 26179 26013 25336 20520 20489 21094 21150 21303 20816 21572 21048 21283 26243 26089 24913 24601 24626 24664 23914 24454 23824 23954 23577 24048 23280 23772 23351 23792 22980 23714 23096 23406 22929 23607 22743 23349 22867 23444 22487 23352 22759 23079 22671 23287 22554 23161 22659 22972 22482 23300 22432 23157 22342 23059 22220 22981 22447 22916 22224 22892 22301 22676 22234 22770 22082 22823 22214 22624 22087 22870 22532 22575 22144 23079 21832 22781 22455 22792 22132 22632 22138 22541 22243 22578 22367 22765 22592 22490 22225 22660 22177 22444 22259 22787 22379 22743 22257 22401 22306 22304 22105 22397 22484 22426 22246 22309 22136 22379 22159 22400 22227 22728 22092 22722 22100 22332 22276 22044 22711 21838 22763 22295 21896 22298 22715 22068 22616 
