# Supplementary material for: An Active Feature Selection Strategy for DWT in Artificial Taste
Source: Hindawi journal article supplement (doi:10.1155/2018/9709505), 2018-01-01
Supplement: f1 [file 9709505.f1.zip › blackTea-hi-1.txt]

43479 43476 43480 43476 51 50 1887 13345 17774 20171 21562 21837 21186 21494 21303 22092 21830 22584 22016 22385 22400 22242 21881 22424 22499 22996 22645 22631 22171 22352 22473 22807 22359 22793 22144 22528 22318 22994 22802 23200 22180 22528 22497 23042 22439 22840 22263 22994 22082 22870 22521 23301 22850 23178 22262 22789 22470 23190 22564 23000 22324 22735 22267 23432 22790 23240 22246 22930 22433 23250 22304 22855 22127 23111 22753 23542 22482 22856 22469 23224 22392 22941 22231 23191 22797 23537 22291 23118 22151 23274 22453 23096 22325 22965 22760 23445 22556 22853 22481 23190 22707 23074 22503 22775 22676 23660 22487 23021 22318 23303 22502 23228 22144 23190 22848 23468 22634 22835 22442 23288 22471 22939 22240 23289 22923 23028 22412 23186 22590 22953 22231 23060 23001 23304 22250 22990 22760 23068 22300 23040 23008 23389 22443 22902 22839 23094 22688 22664 22198 23513 23412 22641 22056 23280 22716 22697 22060 23157 23432 23737 22117 22419 23072 22843 22500 22118 22967 23884 22826 22180 22794 23196 22616 22193 22199 23456 23736 22641 22002 22976 23122 22710 22145 22408 59 11575 14983 16330 18359 18466 19513 19485 21014 20572 33591 26480 25213 24199 23765 23268 23618 23712 23528 22868 23402 23022 23183 22442 23489 23168 23405 22515 23132 22840 23226 22692 22946 23130 23388 22468 23086 22824 23260 22240 23209 23064 23336 22341 23088 22822 23116 22362 23112 22969 23429 22263 23184 22692 23114 22177 23244 22648 23592 22290 23233 22565 23123 22352 22944 22881 23539 22365 23033 22681 23178 22436 22944 22712 23597 22799 22972 22369 23338 22373 23121 22383 23500 22923 23098 22206 23232 22524 23072 22228 23312 23073 23128 22331 23317 22503 23280 22080 23222 22844 23416 22261 23210 22577 23156 22189 23232 22747 23406 22415 22907 22752 23064 22503 22850 22878 23436 22516 22937 22768 22984 22446 22811 22854 23462 22536 22821 22714 23220 22556 22683 22556 23485 22534 22824 22704 23040 22369 22426 22727 23815 22786 22377 22604 23253 22792 22793 21923 23277 23698 22915 21871 22989 23004 22656 22020 22931 23742 23049 22016 22929 23109 22759 22243 22272 23424 23878 22364 22432 23076 22871 22469 22283 23238 23693 22157 22594 23127 22798 22361 22634 23378 22708 22738 22846 23008 22411 22913 22986 23305 22492 22801 16404 20721 21211 21642 21382 21400 21584 22215 21970 37590 25528 24640 23476 23480 22908 23479 23136 23607 22981 23296 22744 22926 22438 22954 22342 23151 22817 23561 22968 23633 23056 23536 23048 23488 22756 23394 22603 23147 22448 23016 22168 22984 22279 23104 22277 23175 22489 23335 22625 23427 22580 23260 22432 23142 22358 23246 22507 22816 22195 22956 22241 23099 22778 23488 22945 23592 22763 23367 22374 23015 22126 23069 22375 23080 22390 23305 22585 23216 22455 22976 22400 22769 22134 22753 22537 23181 22680 23505 22888 23612 22880 23412 22570 23075 22140 22960 22289 23086 22504 23287 22570 23283 22668 23263 22725 23162 22484 22998 22585 23040 22592 23197 22636 23160 22440 22711 22608 23433 22901 22728 22491 23079 22697 22715 22722 23376 22376 23315 22711 22988 22589 23245 22324 23141 22364 23623 22171 22881 22503 23392 22497 22506 22653 23097 22760 22708 22991 22821 22695 22117 22662 23429 22455 22812 22253 23832 21953 23157 21996 23761 22340 22999 23140 22224 23158 23223 22205 23208 22552 22568 22982 22229 23060 22711 22044 23779 22359 22227 23666 22736 22912 23748 22220 22829 22794 22647 22944 22446 23397 22464 23104 15735 21293 21528 22005 21672 22214 21852 22103 22140 22316 25241 24182 23187 23761 22731 23424 22663 23552 22757 23173 22865 23069 23108 22937 22576 23296 22504 23493 22423 23127 22745 22930 22739 23584 22246 23136 22653 22900 22675 23607 22293 23064 22529 23228 22386 23564 22832 22837 22254 23280 22665 23001 22229 23424 22880 23256 22149 23141 22340 23255 22617 22965 22272 23322 22901 23534 22480 22870 22409 23108 22422 23231 22584 23095 22170 22952 22299 23443 22682 23355 22493 23184 22248 22836 22148 22868 22311 23127 22333 23317 22504 23174 22480 23128 22632 23191 22532 23194 22524 23236 22452 23145 22408 23213 22455 23168 22355 23080 22520 23098 22404 22968 22241 22872 22368 23112 22800 23468 23042 23397 22568 22780 22295 22796 22369 23033 22677 23115 22560 23226 22360 22734 22412 23159 22949 23425 22749 22818 22201 22909 22705 23206 22596 22868 22615 22712 22119 23040 23168 23655 23016 22579 22099 22372 22458 23277 22882 22678 22043 22199 22804 23772 23592 22864 21836 22458 22951 23031 22505 22710 21941 22896 23633 23695 22404 22180 22839 23215 22637 22554 22083 22806 23529 23594 22147 22343 23052 23006 22316 22082 22280 23515 21784 21509 21938 22208 22417 22311 22229 21984 22884 26401 23640 22912 23411 22964 22953 22474 23161 23240 23210 22535 23108 22798 22940 22631 22800 22925 23320 22378 22927 22744 23072 22403 22785 22877 23377 22492 22768 22761 23018 22439 22740 22768 23511 22365 22945 22688 23535 22148 23288 22796 22865 22429 23127 22436 22825 22548 23483 22549 22802 22593 23114 22336 22898 22728 23552 22409 23003 22544 23104 22045 23285 22823 23166 22264 23240 22391 22839 22684 23512 22273 23024 22595 23021 22129 23159 22786 22991 22210 23237 22326 22851 22517 23552 22415 22832 22563 23019 22254 22960 22864 23024 22288 23147 22384 22645 22647 23398 22435 23005 22581 23155 22328 23192 22868 23273 22208 23254 22384 22896 22424 23545 22327 22837 22600 23079 22197 23223 22821 22796 22549 23140 22648 22816 22912 23109 22408 23145 22455 22738 22669 23405 22388 22928 22579 22976 22448 23401 22487 22939 22664 22857 22299 23380 22636 22801 22752 22977 21999 23440 22944 22248 22893 22864 21935 23537 23027 22151 22983 22881 22017 22711 23640 23607 22208 22279 23107 22808 22200 22432 23387 23653 22445 22055 22119 22708 22983 23209 22983 23216 23035 23172 21417 22317 22392 22456 22281 22376 22227 22410 22281 22252 23559 23040 23213 22920 23244 22787 23100 22377 22740 22528 23185 23095 23287 22529 22610 22661 23100 22377 23079 23061 22767 22474 23076 22605 22935 22986 22764 22561 22737 22859 22746 22560 22833 23046 22651 22670 23168 22304 23195 23008 23090 22196 23158 22534 23317 22304 22787 22226 23162 22829 23168 22820 23020 22440 22981 22165 22830 22306 23075 22378 23255 22509 23483 22535 23561 22333 23168 22176 22804 22208 23100 22726 23175 22791 22400 22220 22736 22454 23425 22549 23421 22361 22983 22200 23308 22836 23247 22135 23057 22520 23408 22249 22808 22457 23248 22778 23053 22223 22829 22438 23379 22373 23005 22091 23200 22806 23066 22249 22747 22473 23568 22372 23031 22376 22848 22721 23043 22658 22583 22498 23424 22856 22787 22808 22896 22349 23004 22570 22727 22473 23062 22341 23100 22532 22637 22810 22997 22169 23365 22313 23001 22860 22481 22597 22738 22985 22907 22290 23713 21875 23092 21920 23927 21837 23191 21865 23924 21859 23066 21878 23816 22257 22704 22338 23155 22999 22545 22969 22116 23382 22974 22371 23194 21995 23469 22986 22216 22807 22592 22474 23850 22290 22549 22959 22401 22503 23783 22323 22389 22847 22807 22570 23088 23077 22229 23034 22636 22997 22338 22999 23001 23126 22409 22657 22584 23015 22627 22621 22722 23340 22983 22976 22348 22844 22447 23040 22704 22802 22244 22934 22823 23420 22840 22860 22404 22712 22274 22853 22429 23128 22475 22996 22223 22842 22312 23098 22696 23393 22895 23444 22831 23268 22471 22944 22128 22773 22292 23150 22200 22639 22248 23028 22375 23126 22316 23138 22260 23013 22412 23111 22482 23121 22396 23075 22413 23029 22360 22988 22264 22847 22132 22779 22082 22849 22147 23033 22535 23463 22698 23468 22792 23348 22381 22838 22072 22901 22559 23058 22551 23265 22593 23126 22444 23120 22181 22872 22033 22855 22393 23255 22775 23496 22692 23216 22629 22920 22272 22884 22543 23209 22483 23000 22567 22742 22158 22913 22816 23273 22961 22964 22412 22744 22343 23123 22657 23033 22423 23069 22099 22893 22844 23525 22722 22726 22234 23063 22880 22933 22567 22557 21842 22666 23207 23918 22697 22247 21999 22916 23084 22715 22380 22134 22679 23682 23619 23471 22400 22025 22481 23224 22660 22968 22089 22356 23303 23771 23323 22708 21881 22508 22908 23152 22485 22192 22140 22890 23316 22787 22797 22452 23138 22528 22957 22262 23127 23065 23004 22377 22937 22785 22808 22285 22807 22956 23093 22378 22832 22702 22916 22383 9256 17454 20270 19884 20795 20458 20849 20334 21462 43460 27320 24473 24615 23538 23751 22798 23816 23241 23378 22848 23485 22709 23122 23026 23744 22664 23200 17696 21450 20543 22034 21532 21752 21521 22232 21368 38669 24899 24845 23255 23681 23209 23637 22584 23750 23079 23376 22522 23498 22631 23348 22572 23710 50 20701 21440 22099 21196 22457 22090 22274 21797 22647 26407 24216 23501 24009 22809 23356 22993 23296 22496 23600 23010 22980 22852 23176 22585 23058 23151 17812 21163 22405 21907 22117 22469 22912 21925 22774 22068 24509 23264 24057 22935 22901 22984 23350 22185 23724 23303 22263 22996 23080 22418 22220 23069 23860 20753 22217 22727 22323 21575 22843 23502 22490 21925 23026 23240 22504 22673 23626 23863 22796 22182 23152 23204 22643 22626 22587 23429 23117 23264 22328 22929 22810 23104 22848 22999 22720 22769 22433 22836 22835 23414 22954 23306 22617 22819 22328 22830 22408 22743 22277 23112 22997 23513 22510 22779 22453 23259 22575 22792 22856 23194 22395 23171 22428 23212 22673 23218 22405 23495 22066 23332 22595 22792 22649 23288 22097 23191 22766 22765 22622 23463 22148 23225 22747 22866 22500 23566 22147 23187 22814 22964 22536 23505 22284 23035 22834 22951 22544 23242 22282 23100 22286 23336 22407 22893 22933 22721 22573 22829 22824 23060 22669 23008 22716 22800 22623 22834 22757 22901 22740 22826 22974 22685 22443 22971 22563 23250 22165 23035 22453 22956 23348 22140 22580 22538 22417 23824 22010 22693 23014 22224 22817 23626 21989 22241 23050 22373 22280 23816 22775 22606 22877 23028 21965 22837 23653 23277 22154 22562 22870 22752 23091 22402 22826 22784 23361 23070 22854 22332 22958 22539 23168 22497 22705 22372 23266 22903 23427 22581 22721 22309 22826 22457 23136 22604 23192 22460 22881 22293 22901 22321 23035 22680 23475 22756 23518 22864 23517 22740 23451 22596 23344 22532 23168 22560 23092 22518 23024 22328 23021 22380 23149 22283 22937 22370 23071 22394 22865 22313 22928 22451 22934 22512 23130 22434 23174 22622 23352 22845 23522 22799 23360 22607 23202 22596 22962 22389 22667 22268 22904 22461 23181 22714 23072 22648 23117 22520 22867 22528 22772 22094 22403 21953 22609 22948 23724 23601 23740 23224 23155 22016 22123 22243 22949 23056 23105 22404 22997 22193 22023 22556 23424 23668 23557 22519 22615 21980 22208 22958 22813 23111 22473 23010 22195 22836 22953 23275 23075 23063 22397 22775 22672 23118 22423 22952 22189 23004 22890 23280 22354 22805 22455 23202 22464 22929 22456 22842 22660 23458 22724 22960 22344 23288 22515 23124 22112 22808 22503 23532 22584 22785 22317 23296 22483 22929 22053 23054 22758 23356 22428 22908 22496 23056 22368 22862 22089 23060 22906 23287 22212 23017 22465 23047 22214 22816 22647 23424 22669 22853 22384 23082 22447 22727 22529 23362 22550 22713 22636 23005 22546 22644 22800 23445 22713 22652 22572 23066 22572 22288 22746 23754 22649 22304 22965 22736 22131 22341 23440 23425 22728 22112 23005 22780 22417 22197 23307 23592 22202 22387 23040 22619 22099 22249 23489 23197 22060 22794 22976 22487 22909 22822 23296 54 15723 19414 20386 20058 21035 20809 20659 20725 21115 34625 25144 24070 24493 23280 23367 18752 21410 20909 21920 21800 22007 21363 22352 21673 39953 24865 24856 23408 23636 23168 19212 20805 22192 22065 22657 21506 22664 21862 22444 21752 25655 23773 23620 23092 23628 16066 21957 22208 22718 21904 23127 22052 22656 22115 23239 24430 23748 23288 23516 22520 23680 22228 22768 22258 23115 22161 22681 22544 23373 22210 25068 23117 23662 22537 23717 23066 22920 22785 23281 22624 22848 23111 23418 22404 23154 22851 23365 22321 23311 23128 22603 22784 23018 22449 22595 23594 23402 21957 23172 22772 22490 22248 23932 22967 22216 23085 22790 22065 23092 23668 22679 22248 23255 22599 22151 23420 23488 22033 22897 22964 22596 22966 23031 23211 22372 23048 22729 22848 22402 23239 22991 22627 22694 22963 22505 23085 22965 22839 22497 23140 22534 22725 22599 23445 22594 22897 22649 23091 22290 23040 22998 23028 22344 23325 22455 22966 22253 23479 22601 22971 22552 23126 22144 22967 22757 23303 22142 23230 22452 22848 22391 23379 22882 23162 22209 23148 22468 23136 22279 22749 22373 23405 22930 23360 
22293 21658 21687 21350 21692 21798 22176 21890 21576 21433 21531 21400 21860 21687 21779 21339 21652 21508 22127 21969 22220 21737 21868 21179 21931 21413 21982 21482 22081 21682 21931 21396 21936 21145 21803 21286 22167 20941 20763 21672 21191 21740 20855 21280 21091 21600 21220 21621 21050 21523 20773 21491 21166 22092 21648 21878 20914 21697 21096 21881 21451 21795 21177 21024 21724 22614 22192 21845 20725 21578 21733 22017 21383 21186 20801 21949 22600 22385 21088 21339 21792 22128 20764 21300 20966 22274 22708 22819 21833 21265 21447 22249 21637 21584 20973 21960 22552 22700 21933 21380 21925 21828 21999 21789 21707 21604 22295 22009 21934 21515 21981 21981 21907 21632 21839 22016 22344 22062 21849 21577 22118 21753 21991 21367 22167 22129 22020 21437 21995 21963 21902 21464 22016 21993 22455 21365 22109 21699 22165 21336 22053 21877 22557 21469 22027 21537 22393 21547 22159 21316 22425 21917 22217 21336 22345 21561 22048 21093 22075 21785 22641 21404 22058 21803 22226 21751 21911 21628 22656 21687 22008 21504 22448 21413 22156 21130 22420 21920 22451 21295 22193 21715 22295 21414 42 59 50 49 58 55 46 131 69 59 43377 31285 26976 24143 23695 22057 22310 21672 22587 21785 21790 21480 22071 21430 21579 21324 22290 21751 21874 21127 22086 21362 21735 21212 22296 21544 21841 21212 22179 21220 21754 21400 22389 21560 21747 21252 22069 21424 21789 20813 22473 22092 21539 21221 22208 21477 21290 20903 22322 22347 21593 21024 22164 21513 21476 20802 22359 22409 21700 20778 22177 21677 21446 20828 21385 22237 22661 21295 21237 21877 21877 21186 21127 21836 22929 21700 21174 21837 22017 21835 21362 22016 22058 21977 21365 21928 21665 21853 21533 21619 22057 22122 21463 21825 21831 21776 21492 21593 21817 22295 21592 21766 21776 21915 21671 21595 21685 22456 21414 21892 21838 21944 21632 21705 21708 22362 21725 21827 21538 22204 21512 21776 21399 22423 21584 21828 21463 22137 21126 21735 21416 22554 21596 21878 21159 22210 21486 22017 21074 22172 21750 22386 21144 22167 21640 22063 21216 22099 21898 22273 21348 21960 21587 22056 21576 21765 21519 22555 21271 22028 21473 22165 21408 21851 21664 22593 21277 21851 21590 21953 21298 22135 22006 22249 21319 22357 21331 22117 21152 22610 21773 59 53 56 3121 7086 7545 9392 9405 10530 10485 43376 34420 28132 24699 24032 22411 22465 21590 22071 21446 22222 21621 22010 21386 21920 21626 21908 20925 21547 21057 21888 21344 21756 21440 22147 21689 22249 21888 22377 22063 22517 22113 22315 21556 21799 21717 21710 21184 21201 20867 21194 21099 21591 21542 22087 21857 22119 21585 21755 21235 21554 21301 21409 20790 21152 21180 21976 21928 22669 22429 22725 22389 22217 21785 21906 21136 21167 21038 21654 21728 22164 21628 21819 21699 21275 21602 21363 21563 21180 21789 21304 21973 21760 22189 21960 22065 21966 21869 21589 21669 21352 21474 21559 21647 21449 21737 21575 21967 21550 21893 21672 21920 21389 21637 21335 22043 21832 22212 21531 21525 21504 22098 21483 21789 21698 22313 21067 21872 21511 21728 21570 22348 21291 22081 21296 22189 21307 21984 21493 22087 21624 21936 21592 21922 21623 22082 21403 21904 21582 22103 21398 22084 21509 21929 21401 22084 21327 22044 21281 22380 21000 22177 21270 22254 21312 21770 21529 22026 21142 22472 21240 21965 21644 21918 21397 22417 21033 22184 21632 21846 21572 22076 21181 21997 21063 22261 21217 22083 21679 21741 21256 21873 64 9785 12216 14068 14444 15532 15341 16474 16023 16617 33066 26196 23562 22673 21980 22163 21755 22171 21504 22098 21216 22407 21185 21898 21559 21873 21787 21598 21139 22089 21197 22298 21690 21684 21317 22109 21168 22263 21591 21504 21214 22123 21195 21961 21888 21649 20959 21778 21666 21614 21067 22017 22324 22095 20801 21442 21371 21981 21732 21513 20868 22400 22416 22422 21255 21109 21229 21582 21712 22255 21461 21200 20799 21666 22197 22780 22458 21687 20816 21076 20868 21625 21336 21578 21463 21717 21679 21947 21827 22112 21770 21700 21655 21596 21856 21504 21879 21552 21788 21586 21987 21734 21888 21779 21945 21850 21856 21810 21911 21753 21816 21552 21760 20988 21683 21293 21546 21267 21750 21677 22187 21809 22331 21804 21990 21312 21520 21390 22017 21555 21854 21370 21863 21050 21793 21480 22260 21821 22138 21376 21734 21314 22050 21533 22027 21277 21850 21221 21751 21371 22403 21757 22381 21509 21952 21146 22119 21466 22135 21309 21729 21101 22318 21770 22204 21280 21805 21475 22156 21399 21948 21088 21895 21714 22486 21369 21797 21136 22288 21258 22176 21057 21870 21537 22428 21277 21870 21496 22208 21360 21962 63 15070 17214 18465 17957 19223 18765 19480 18717 19622 32704 25271 22406 22401 21719 22364 20810 21844 21392 22573 21673 21875 21376 22179 21361 21959 21095 22186 21818 21939 21227 22022 21313 22111 21129 22285 21745 21901 21253 22176 21481 22411 21152 22097 21656 21897 21375 22066 21838 21747 21628 22301 21229 21905 21688 21967 21124 21656 22119 22200 21037 22027 21617 21537 20873 21880 22493 21781 21106 22227 21393 21156 21542 22708 21440 21282 21888 21655 20788 22041 22445 21608 20976 22308 21490 21185 21627 22839 21303 21495 21972 21614 20807 22164 22458 22272 20832 22084 21523 21287 21511 22697 21364 21393 22024 21569 21504 21661 22295 21405 21911 21606 21861 21284 21761 22018 21948 21440 21920 21664 21521 21757 22249 21712 21608 21724 21879 21173 22049 21815 21704 21566 22071 21341 21942 21953 21965 21445 22004 21065 21661 21527 22250 21234 22024 21480 21713 21548 22422 21277 22071 21441 21804 21248 22437 21383 21922 21548 22359 21156 22446 21536 21872 21510 22117 21070 22451 21368 21948 21424 22095 21006 22077 21545 22479 21242 21971 21580 22044 21300 21830 21672 22548 21632 22053 21111 21884 21128 21988 21267 22091 21255 17508 19564 20839 20248 21141 20548 21305 20605 21289 34503 23967 21815 22041 21328 21944 21161 22133 21453 22579 21704 22385 21261 21910 21410 22151 21415 21924 21771 22460 21036 22121 21523 21947 21393 22475 21116 22039 21429 22283 21287 22031 21353 22382 21193 22026 21269 22101 21510 22135 21108 22136 21793 21906 21237 22222 21482 22311 21303 22071 21017 21731 21081 21905 21820 22166 22359 22024 22329 21849 22012 21819 21111 21353 20851 21224 21504 22332 21824 22904 21600 22299 21080 21144 21054 22016 22434 21968 21997 21325 21008 21186 21737 22741 21508 21429 20984 22048 22531 21613 20983 21507 21955 22823 20992 20957 21687 21696 22203 21559 21836 21257 21910 21996 21731 21671 21510 21760 22103 21670 21911 21540 21795 21655 22022 21953 21754 21350 22022 21585 21962 21319 22104 21833 21715 21506 22334 21368 21772 21872 21938 21441 22340 21261 21846 21729 21799 21574 22484 21274 22199 21514 22017 21420 21825 21813 22055 21456 22289 21251 22158 21261 22480 21123 22132 21185 22495 21073 22127 21233 22503 21298 22279 21419 22184 21677 21829 21477 21792 21685 22059 21216 22045 21119 22317 21536 21990 21363 22116 21190 22502 21056 21743 21399 21931 21405 22427 21133 22144 21490 22243 21257 22464 21595 21968 21377 22275 21256 22008 21579 22569 21344 21795 20727 22245 21481 21941 21307 22486 21756 22069 21086 21940 21340 22080 21584 22067 21198 22209 21893 22406 21479 21784 21159 21935 21369 22125 21580 22145 21579 21838 21225 22101 21635 22290 21865 22458 21751 22117 21223 21692 21025 21517 21212 21866 21416 21937 21825 22061 21783 22330 21854 22183 21776 22060 21560 22144 21797 22041 21298 21546 21300 21925 21479 22065 21749 22227 21884 22345 21826 22148 21543 21825 21455 21048 21412 21559 21013 21015 21073 21664 21831 22618 22528 22674 22286 21598 21645 21424 21712 21281 21785 21394 21978 21725 21963 21609 21766 21934 21604 21353 21509 21624 22091 22122 22227 21981 22151 21714 21712 21339 22034 21703 22049 21580 22041 21485 21652 21478 22168 22067 22402 21868 21991 21296 21835 21521 22263 21516 21966 21362 21680 21680 22459 21873 22046 21233 22103 21488 22177 21336 21799 21218 21875 21482 22530 21701 22176 21085 22077 21510 22160 21587 21908 21217 21981 21735 22460 21696 21965 21223 22214 21401 22099 21068 21924 21473 22422 21700 22265 21120 21841 21378 22201 21390 21981 21069 22016 21747 22489 21415 22001 21472 22185 20617 21913 21483 22438 21662 21995 21279 22267 21363 21798 21298 22396 21858 22116 21303 22198 21504 157 40 64 54 2136 3539 5280 5559 6637 43360 43372 30362 26297 24251 23607 22252 22189 22121 22755 21341 21992 21766 21873 20736 21865 22352 63 59 5463 8768 10501 12698 13619 12487 13940 13942 43264 33435 27723 25527 23596 22101 22907 21928 21473 21963 23142 21621 21432 22038 21899 21267 21254 63 7837 13280 15256 16292 16187 17321 17472 17418 17446 40656 28043 24324 23377 23121 22020 22235 22064 22023 21467 22304 21923 21742 21781 22013 21287 21841 5407 15879 17522 19000 18873 19213 19591 20049 19058 19992 28608 24361 22688 22985 21728 22249 21656 22240 21381 22457 21695 21910 21547 22254 21408 21792 21546 16961 18945 20424 20291 20881 20026 21130 20782 21223 34107 24592 22088 22272 21216 22420 21896 22202 21237 22154 21481 22039 21430 21817 21546 22537 21516 22199 21081 22030 21325 22244 21395 22188 21221 22087 21009 21856 21543 22323 21856 22338 21716 22262 21640 22327 21754 22249 21455 21713 21122 21968 21515 21906 21409 22437 21335 21943 21611 21761 21565 22302 20936 22375 21872 21539 21466 21085 21615 21896 20808 21969 21623 21489 21295 22067 21562 21446 21703 21559 21169 22165 21515 21239 21783 21818 20967 21979 21457 21448 21856 21423 21673 21511 21613 21879 21805 21384 22156 21470 21871 21841 21581 21561 21582 21897 21671 21486 21714 21871 21673 21556 21647 22039 21842 21593 21760 21824 21752 21389 21971 21335 22192 21085 22019 21408 22104 21669 21708 21300 22045 21354 22353 20978 22031 21488 21865 21451 22265 21077 21957 21636 21848 21433 22517 21268 21867 21346 22178 21174 22273 21683 22007 21063 21813 21446 22000 21111 21884 21299 22564 21577 21997 20919 22076 21201 22205 21541 21711 21318 22167 21785 22231 21486 21651 21143 22321 21422 22009 21555 21845 21138 21687 21373 22173 21767 22461 21856 22499 22008 22233 21469 21811 21147 21349 20868 21120 20696 21112 20783 21275 21008 21282 21168 21402 21161 21481 21122 21360 21160 21655 21114 21377 21191 21504 21468 21521 21649 21543 21863 21448 21512 21309 21457 21322 21442 21517 21828 21838 22260 21923 22202 21866 22213 21779 22043 21516 21685 21180 21632 21351 21933 21586 22068 21564 22089 21575 21987 21335 21990 21036 21694 21142 22114 21572 22409 21689 22436 21487 21907 21063 21860 21399 22120 21444 22095 21793 21952 20933 22109 21671 22469 21775 22407 21287 21831 21162 22080 21400 22167 21229 21877 20890 22074 21287 22510 21696 22035 21085 21990 21565 21968 21539 21721 21285 22205 21864 22144 21224 21871 21440 22061 21459 21809 21031 21661 21818 22713 21521 21264 21410 22209 21432 21443 20647 21721 22406 22656 21261 21215 21625 22145 21376 21285 20951 22475 22517 22201 20819 21772 21613 21988 21696 21261 21780 21797 22234 21402 21635 21729 21861 21652 21392 21504 22073 21949 21687 21331 22032 21399 21672 21414 22306 21799 21646 21476 21993 20730 21716 21305 22310 21645 21864 21393 22083 21399 21699 21555 22407 21344 21872 21473 22071 21044 21912 21879 22395 21339 21902 21516 22024 21152 21825 21720 22420 21111 22144 21465 22044 21147 21907 21808 22277 21080 22077 21416 22076 21164 22515 59 55 59 3000 4495 6595 7464 8577 8266 9808 43362 35061 27159 25447 23703 23258 55 7849 11129 13051 13709 15081 14356 15274 15221 43382 33506 27537 25401 24033 22208 101 12037 14917 16535 18307 17815 17260 17920 18379 43247 31735 26645 24971 22521 22804 3778 15553 17714 20077 18958 19055 19792 19739 18936 20038 30241 24503 23392 22736 22533 7689 18657 20389 20358 20656 20918 20684 20591 20868 21344 27139 23656 22481 22455 21684 22702 22024 21891 21801 22160 21743 21816 22016 22435 21331 22193 21486 22310 21153 22337 21717 21847 21571 22149 21149 22097 21696 22362 21116 22187 21399 21848 21299 22418 21377 21959 21545 21984 20999 22179 21730 21980 21296 22208 21170 21828 21732 22283 21091 22158 21428 21793 21263 22605 21413 21946 21255 22173 20939 21834 21704 22300 21085 22178 21312 21720 21552 22436 21341 21943 21467 21773 21099 21915 21847 22039 21240 22146 21360 21723 21397 22352 21541 21617 21556 22052 21280 21273 22197 22296 20757 21920 21544 21446 20997 22702 21828 21104 21639 21936 21042 21076 21693 22736 21840 21294 21141 22096 21645 21641 21047 21037 21549 21922 
22041 21845 22403 21646 22416 21886 21947 21200 21672 21447 21898 21637 21829 21220 21693 21675 22453 21988 22134 21663 21680 21295 21841 21441 21846 21737 22068 21560 21671 21258 21682 21385 21984 22096 22684 22643 22840 22540 22348 21725 21227 20926 21443 21141 21847 21966 21799 21064 21378 22397 22579 21143 21345 21594 22110 21640 20971 21869 22875 21728 20996 21777 21966 21797 21492 22289 21963 21527 21499 21696 21914 21553 21477 22183 21808 21209 22005 21936 22288 21495 21731 21704 22157 21472 21902 21186 22086 21747 22468 21726 21796 21355 22141 21504 21817 21179 21859 21922 22349 21673 21743 21537 22144 21467 22052 21328 21887 21891 22343 21507 21719 21618 22054 21469 21707 21443 21954 21946 22232 21504 21680 21735 22040 21604 21568 21879 22302 21527 21702 21559 22134 21511 21725 21489 22262 21864 21596 21529 22058 21547 21760 21351 22210 22100 21852 21233 21586 21927 21901 21673 21184 22129 22779 21601 21069 21764 22068 21547 21383 21147 22543 22615 21618 20856 22139 21911 21777 20951 21875 22816 22197 20888 21531 22097 21901 21429 21092 22050 22857 22151 21188 21382 22167 21796 3268 10442 14043 16123 16446 17321 17816 18521 18423 43335 26825 24085 22425 22197 22095 22114 21664 21575 21713 22226 21874 21586 21722 21877 21568 21511 21587 22231 21945 21776 21407 22003 21557 21617 21545 22169 21869 21656 21554 22062 21364 21641 21605 22324 21855 21724 21447 22056 21576 21893 21399 22185 21946 21749 21551 22001 21463 21912 21191 22252 21824 21815 21325 22120 21589 21752 21324 22215 21879 21840 21364 22092 21580 21908 21515 21777 21805 22321 21387 21728 21638 22028 21380 21672 21749 22284 21587 21707 21607 21959 21495 21527 21745 22408 21602 21737 21536 22000 21417 21805 21440 22411 21797 21694 21345 22149 21559 21932 21213 22272 21941 21973 21270 22023 21616 21904 21212 22132 21986 21795 21328 22196 21548 22154 21248 22119 21931 22091 21272 21930 21677 21858 21321 21803 22070 22169 21277 22012 21765 22122 21034 21660 22428 22320 21551 21143 21728 22000 21476 21123 21763 22812 22311 21171 21458 22221 21472 21143 21452 22869 22376 21531 21016 22227 21732 21753 20891 22352 22772 21689 20934 22081 21691 21723 20981 22496 22469 21702 21007 22123 21778 21371 21960 22061 21802 21392 22021 21786 21780 21433 22073 34 17895 19493 20009 20321 20729 20583 20660 20981 20560 27321 23137 22273 22307 21971 22423 21993 22208 21600 21672 21423 21532 21617 21927 21773 21909 21673 21840 21559 21997 21344 21774 21328 21529 21303 21609 21409 21848 21616 22031 21807 22172 21942 22295 21943 22341 21980 22317 21809 22200 21524 21804 21297 21688 21268 21861 21664 22042 21784 21978 21581 21887 21595 21911 21509 21773 21249 21789 21428 22089 21786 22297 21933 22437 21957 22247 21565 21768 21321 21722 21458 21969 21607 22064 21664 21912 21527 21936 21690 21782 21576 21722 21221 21771 21373 22177 21933 22446 21959 22379 21693 22021 21603 21975 21501 21824 21333 21585 21310 21792 21303 21680 21457 22011 21988 22304 21801 21697 21307 21952 21760 21788 21387 22272 21833 21474 21456 22177 21281 22051 21936 21497 21643 21819 21803 22061 21392 22097 21250 22615 20951 22165 21085 22816 21070 22161 20721 22873 20851 22214 20912 22759 21153 22236 21162 22384 21574 21932 22050 21557 21676 21075 22801 21318 21833 22829 21328 21959 22336 21048 21952 22272 21016 22181 21426 21960 21671 21162 21760 21794 20878 22752 21724 21656 22214 21357 21959 21605 21969 21579 21687 22037 18922 20485 20634 21477 20778 21251 21031 21573 21104 36388 23224 22732 21787 21592 21872 21941 22067 21508 22176 21440 22318 21414 21894 21878 21688 22000 21628 22103 22002 21360 22082 21877 21655 21616 22119 21322 22332 21760 21541 21569 21996 21416 21905 22046 21709 21533 21893 21788 21805 21468 22337 21904 21898 21208 21966 21448 22129 21527 21744 21398 22384 21852 21907 21285 21849 21482 21945 21730 22083 21385 21713 21591 22225 21881 22284 21702 21863 21227 21831 21417 22038 21591 22082 21776 22217 21740 22155 21608 21984 21401 21709 21270 21676 21328 21720 21370 21740 21327 21801 21299 21729 21228 21729 21318 21860 21392 21783 21354 21843 21541 22085 21702 22139 21690 21904 21504 21872 21472 21666 21277 21889 21745 22311 21956 22343 21817 21945 21442 21728 21632 22072 21810 21973 21543 21777 21296 21680 21801 22320 21972 22176 21441 21736 21401 21850 21748 22007 21647 21638 20935 21449 21964 22317 22513 22613 21507 21109 21335 22311 21875 21711 21274 21056 21693 22698 22653 21958 20919 21340 21789 22099 21415 21377 20973 22166 22694 22280 21219 21186 21846 22029 21592 21296 21114 22477 22616 21867 20929 21658 22121 21792 16253 20320 21573 21769 21624 21131 21712 21639 21564 21257 23675 22391 22447 21969 21705 21863 21885 21688 21545 21675 22181 21942 21595 21528 21968 21624 21735 21353 22120 21947 21843 21444 22042 21710 21868 21303 22016 22009 21755 21517 21992 21731 22155 21320 22208 21916 21643 21692 21960 21437 21623 21906 22198 21488 21829 21825 21804 21335 21970 21974 21975 21335 22053 21523 21824 21264 22126 21888 21815 21473 22093 21760 21638 21747 22346 21484 21916 21712 21365 21333 22293 21859 21785 21445 22039 21440 21686 21760 22318 21327 21988 21604 21327 21124 21955 21841 21932 21288 22080 21405 21607 21827 22307 21377 21927 21669 21453 21258 22121 21812 21897 21249 22183 21539 21798 21697 22435 21507 21884 21595 21872 21232 22279 22004 21981 21463 22038 21481 21546 21958 22283 21304 22021 21469 21742 21691 22285 21367 21957 21711 21793 21232 22299 21704 21762 21833 21829 21313 22290 21813 21677 21708 21909 21452 21965 22116 21696 21584 21977 21301 21664 22583 21489 21543 21975 21192 21705 22627 21713 21006 22228 21452 21358 20940 22368 22579 21388 21041 22144 21639 21640 20936 22181 22552 22929 22442 22295 21621 21351 21136 21440 21084 20375 20631 20936 20830 21013 20963 21088 21029 21141 24466 21638 21810 21717 21981 21872 22247 22109 22252 22060 21740 21392 21840 21708 21920 21793 21636 21894 21979 21441 21783 21876 21736 21623 22256 21446 21859 21667 21866 21860 22174 21802 21970 21880 21760 21544 22329 21388 21814 21952 21924 21380 21781 21639 22254 21640 21781 21361 22005 21891 21893 22025 21909 21735 21765 21341 21545 21524 21862 21751 22101 21706 22349 21575 22432 21505 22087 21445 21650 21251 21955 21794 22161 22024 21947 21435 21660 21563 22274 21635 22381 21446 21829 21198 22062 21918 22040 21369 21744 21593 22387 21564 21751 21377 22104 21969 21956 21538 21606 21616 22336 21436 21892 21128 22065 21837 22096 21639 21797 21309 22280 21657 22112 21482 21735 21555 22105 21900 21832 21391 22336 21492 21720 21575 22069 21550 21735 21659 22119 21222 22184 21856 21552 21715 22112 21352 21980 21418 22055 21581 21614 21892 21779 21600 22275 21124 22048 21472 22232 21491 21916 22127 21744 21537 21632 22312 21659 21481 21845 21891 22160 21338 22232 21264 22724 21000 22029 20988 22529 21991 21314 22000 21239 22296 22232 21049 21975 21392 21660 22693 21297 21489 22186 21170 22040 22560 21179 21870 22199 21315 21430 22440 21660 21878 21669 22065 21475 21888 22074 22088 21497 21832 21718 21926 21859 21624 22047 22276 21747 21566 21626 21729 21803 22078 21632 21524 21485 22289 22018 21976 21363 21710 21789 21965 21839 21992 21763 21748 21307 21613 21751 22246 21997 22349 21917 22053 21552 21645 21429 21804 21499 22190 21459 21877 21540 22007 21703 21969 21632 21885 21395 21712 21318 21773 21347 21733 21249 21793 21269 21785 21417 21755 21332 21683 21330 21752 21314 21664 21487 22042 21683 22119 21726 22136 21543 22035 21632 21977 21449 21816 21312 21669 21387 22119 21792 22332 21908 22259 21997 22258 21708 21887 21308 21804 21332 22001 21625 22158 21600 22016 21468 21968 21349 21611 21229 21814 21689 22319 21973 22218 21488 21679 21489 21942 21769 21994 21581 21909 21472 21652 21545 22049 21812 22373 21776 21849 21327 21848 21746 22049 21560 21959 21251 21649 21723 22705 21869 21595 21077 21504 21901 22067 21656 21533 20928 21670 22426 22872 22070 21286 21013 22090 21917 21697 21424 21312 20961 22118 22631 22585 21352 21200 21593 22272 21667 21486 20915 21095 21749 22753 22656 22090 20995 21351 22073 21839 22144 21463 21725 22016 22275 21657 21604 21912 21833 21148 21438 21844 22202 22049 21650 21669 22024 21692 21656 21530 22048 22100 21797 21451 22101 13379 17141 18166 19486 19204 19107 19323 19559 19230 37981 23875 23255 22200 21952 21866 22126 21590 21682 21997 22096 21337 22103 21550 21736 21143 22105 27 19012 19682 20541 20083 20449 20663 21034 20244 21032 28323 23055 21808 22464 22128 21937 21520 22144 20928 21649 21709 22322 21403 21813 21729 21916 21344 14091 20244 20874 20621 21421 20513 21161 21338 21747 20726 24849 22496 22268 21298 22444 21835 21703 21551 21940 21540 21819 21929 22060 21232 22120 21491 21646 18853 21416 20746 21562 21252 21450 21115 22098 21357 43228 23016 22227 21272 22257 22560 21546 21648 22013 21116 21312 22496 22091 20995 21913 21928 21702 20935 21463 22095 20993 21324 21929 21749 21032 21927 22736 25064 21549 22160 21664 21408 21113 22011 22795 22048 21018 21728 21849 21795 21608 21529 21612 22151 22104 21939 21517 21560 21445 21815 21765 21888 21736 21736 21559 21508 21397 21883 21842 22135 21901 22245 21962 22076 21333 21729 21048 21908 21687 21584 21700 22358 21581 21674 21590 21907 21437 22385 21251 21936 21276 22263 21666 21924 21859 21810 21523 22393 21360 21816 21917 21840 21307 22391 21281 21806 21947 21881 21251 22372 21436 21750 21774 22139 21395 22342 20876 21673 21930 22136 21508 22405 21244 22060 21725 21756 21600 21770 21688 21943 21536 22155 21440 21831 21431 22291 21257 21990 21394 22301 21185 22064 21306 22230 21319 21774 21766 21803 21966 21494 21561 21831 21505 22567 20995 21818 21880 21589 22496 21120 21382 22305 20877 22437 22325 21092 21483 22243 20896 22189 22535 21246 21374 21996 21063 21382 22624 22391 20973 21475 21657 22076 21829 21372 21878 21927 22097 21826 21385 21576 21675 21888 21969 21624 21609 21828 22231 21936 21833 21296 21808 21191 21845 21870 22007 21555 21668 21525 22097 21947 22369 21985 22247 21870 21980 21291 21670 21209 21654 21167 21876 21537 22028 21581 21931 21412 21828 21477 21876 21466 21943 21553 21978 21560 22020 21453 22043 21569 21957 21443 21962 21728 22071 21656 21946 21509 21957 21418 21893 21462 21915 22001 21931 21472 21657 21248 21812 21339 21765 21657 22144 21871 22305 22036 22220 21879 21939 21442 21670 21321 21655 21456 21857 21679 22070 21850 22183 21570 21800 21367 21201 20839 21180 21339 22429 22568 22760 22182 21625 20954 21186 21446 22158 21981 21806 21766 21095 21025 21728 21745 22657 22410 21997 21820 21378 21711 21819 21879 21696 21155 21470 21468 21607 22085 22193 21979 21364 21704 21878 21989 21569 21784 21327 22029 22040 22156 21455 21666 21452 22048 21639 21803 21365 21702 21877 22360 21651 21749 21498 22064 21548 21919 21296 21821 21885 22371 21510 21682 21561 22123 21474 21865 21241 22068 21936 22030 21382 21721 21735 22059 21458 21709 21403 22301 21766 21856 21312 22205 21652 21895 21330 21760 21913 22238 21360 21959 21719 21840 21351 21933 21919 22107 21303 22119 21569 21722 21286 21828 21937 22240 21234 21835 21784 21332 20901 22023 22535 21591 21063 22225 21565 21440 20978 22016 22528 21753 21025 22191 21790 21408 21191 22550 22429 21215 21451 22170 21687 21366 21393 22574 21940 21465 22016 21552 21645 21653 6460 16845 18418 18946 19145 18919 19271 19692 19593 19200 27479 22954 22461 21627 22112 29 19195 19728 20492 20171 20373 20729 21153 20358 20788 28844 23289 21852 22362 22076 21984 18462 20661 20527 20858 20876 21747 21044 21207 21216 32236 23032 22362 22176 22312 21383 18806 20394 21166 21170 21982 20980 21522 21344 21624 20969 23601 22468 22040 21714 22238 17965 21020 21596 22065 21033 21888 21431 21476 21052 22049 22953 21973 21789 22065 21500 21782 21984 22136 21371 22032 21561 21696 21424 22369 21994 21664 21531 22026 21620 21512 22281 22026 21047 22109 21604 21153 21163 22772 21714 21137 21995 21658 21096 21973 22599 21611 21046 22189 21469 21099 21999 22648 21061 21773 21778 21443 21151 22676 22000 21520 21990 21581 21483 21686 22159 21875 21424 21749 21770 21504 21511 22034 21728 21449 22043 21568 21514 21979 22173 21261 21892 21692 21824 21235 21925 22032 21819 21506 21985 21505 21632 21736 22308 21432 21687 21678 21906 21431 21838 21959 22020 21284 22093 21491 21792 21449 22342 21595 21735 21689 21838 21568 21623 21674 22422 21621 21847 21296 22056 21633 21859 21432 21576 21449 
39072 36901 42598 34871 42445 37640 38053 39800 34917 42414 37542 34400 36448 40058 35394 34905 43127 38587 40047 35077 34678 40907 36839 42221 37018 35696 39030 33577 34757 40257 35043 41625 38372 39381 35462 34896 36870 33575 41926 35812 40292 37240 42375 39532 37032 38241 36355 38323 41580 43081 34392 39240 41424 34235 39652 34443 37493 37239 37588 35369 37450 35888 38192 36258 42816 41613 38378 33283 42954 35219 37429 33392 42593 40791 38644 33828 42671 37594 35533 33800 35577 42136 33438 35232 36038 35492 37063 40458 39539 36536 34530 36651 37840 34391 32799 35278 38370 36418 42784 40680 41975 41333 41355 40303 43064 39978 37288 35414 33559 35826 34324 34095 38852 42891 35658 42268 38087 37959 40963 32796 34560 35607 38667 34075 33255 37143 41686 33440 35040 33513 39793 33110 35430 42720 41607 37159 34024 32968 38852 33561 35384 41476 40791 39627 37008 40256 33897 37632 37488 34871 39424 39901 36776 33996 38444 35723 39031 33575 41616 39600 33914 34521 34088 36018 40064 37713 35858 37304 37143 36588 40610 36570 33199 39226 37559 42282 38912 38901 37333 40163 39843 41773 40535 36260 22832 27300 35594 38003 29851 38798 34536 31576 40825 41917 38738 40489 43073 40882 39839 39742 34684 33707 35095 40723 37224 33772 35303 37120 33433 32781 33639 40900 38088 35813 42089 38816 33616 34055 33178 40083 37344 34572 33222 39015 41632 34660 34002 41602 37321 35544 42407 39168 33755 37096 41952 40682 38096 35904 33543 38328 42773 37641 39940 41371 36536 36524 41222 39881 34072 35665 41067 41051 37505 36578 41488 39638 33932 37214 33013 35650 36328 41691 42080 35572 34306 38565 41627 34955 35716 41304 34098 35219 34133 38026 43121 33504 35515 42471 34240 35542 32939 38196 42166 36653 42096 43041 36487 35223 41201 40199 33805 37594 40224 41142 38052 38291 40556 38842 34187 37049 40112 39971 38412 36237 40947 40672 33587 39863 40166 39995 37958 39585 40569 37847 35072 36758 41111 36528 39175 40384 40873 38883 35885 39701 38193 34723 42791 41880 33893 39211 35442 38313 42707 39255 35840 36657 41792 39832 42564 41233 42752 39622 42600 37658 42412 33541 37600 40945 35702 35802 36574 41913 36599 35096 36933 39190 35313 35477 37565 43488 43724 35536 37857 39954 35986 41761 38164 39259 36372 41546 38784 36141 35840 42212 39469 18150 34840 31853 37504 40961 35076 33158 33757 37399 32701 43776 40555 41269 41824 38392 43016 38752 40606 34048 34624 42224 33421 34011 37624 36016 37419 34883 36440 33607 38460 41270 36165 40979 33340 40832 34362 41739 36927 34067 38758 36582 40272 37989 41634 38168 42089 38544 41968 36504 40552 33161 36144 40712 35147 40295 37127 34560 38712 36020 38241 33956 37395 34109 37442 32860 35830 40086 36359 42069 39616 36159 41472 38048 43064 38288 41355 33965 35616 41051 35648 42345 38304 34304 38807 34642 37296 33216 37439 35088 35928 33573 35298 40098 36084 41793 40460 38016 43275 38409 42668 35512 38533 34180 38227 43258 36608 41252 33965 40960 36128 40983 34954 42344 39042 38416 41459 36448 35021 40986 37937 35576 36033 41787 41223 36820 42609 42624 40506 40730 39125 37690 43078 34852 36482 36361 39148 41714 39629 40293 34800 37280 40224 38964 36637 38592 40138 34848 37372 36213 40720 36789 36334 39284 41160 39720 42454 33949 37586 38885 33559 34761 38441 36524 41052 36800 37024 41009 38292 41849 38390 37816 41065 37934 40456 42304 38176 34990 39411 35612 36000 36416 35941 35443 34456 40648 41833 38350 34208 37937 33908 34993 38688 36261 31818 33433 42554 35512 40197 38286 33741 38589 39254 41304 36120 36132 33811 36792 37859 39170 32853 39971 42285 42121 42320 37477 37216 34995 38281 34493 39486 38592 41464 39424 37300 34728 33971 39722 41248 42168 35746 33240 33353 38348 42044 37543 39028 35495 33223 37089 36096 36377 42651 42154 37398 37298 39961 38365 42396 40055 33337 35413 41782 42581 37120 37413 40705 37035 42832 38163 35520 39242 41821 35505 33974 40688 37408 41364 35380 37029 40379 36887 42112 39006 34128 39079 35828 40773 35878 40116 34199 38035 41957 35640 40441 35072 40906 35541 41634 35926 41331 36450 40840 35645 40214 35612 40993 37045 41578 36314 41459 36934 33283 39179 35296 40054 35232 37125 32586 36747 42496 34912 40628 37248 35687 41728 38114 42194 36716 37933 42285 35593 34049 38978 36352 38208 33468 35705 40576 34917 36162 41552 38322 40221 42423 35804 41856 37036 35720 38690 34798 34292 37035 42428 38338 41920 44058 34907 32726 38796 41433 41984 37394 35552 40482 38264 35282 35398 35128 37959 37033 41337 36384 39500 42296 41792 37849 40224 35592 41168 40368 39782 36897 38784 33960 40510 39193 43660 34832 37091 36885 34624 39704 36076 39304 40947 33881 35712 34248 39069 35241 34410 33495 40208 36272 42675 43632 38386 35337 37026 37417 34990 33225 34774 40304 38016 34144 32864 37778 34330 35607 41417 39885 38177 36820 42256 39072 35520 37015 41002 38487 38768 36096 32997 38189 35626 40032 41120 40689 37721 34595 35002 37880 42519 34713 37203 40632 42902 36834 36437 36288 41349 38244 38281 38423 41436 39168 33159 36198 40200 40084 37140 36552 42568 39815 35625 34316 35650 42022 43143 37798 35200 41696 41472 41680 37179 36096 42312 39142 42244 35259 35430 41811 41613 38500 34100 41344 39109 38067 36699 37760 40657 39257 42186 34492 36418 41617 41745 37960 34850 42581 40615 39965 36455 37296 40162 40663 33441 36051 34994 42868 33120 37120 34087 36823 40123 41509 38722 38529 42773 39045 42937 33636 37871 41495 41056 38759 42900 36086 35142 41393 41986 38234 35595 35992 40052 41792 35382 35557 36571 36560 40871 41491 36633 35001 35201 37377 42496 38448 39731 35079 33546 38128 40977 34711 34155 42672 33667 38208 39817 35352 34649 35173 37719 40876 42696 41946 37355 42145 34385 41624 38264 39794 34652 34208 36836 40368 33812 37782 43128 41897 34620 41462 39207 42256 38948 41742 33965 36840 35996 37762 37425 38530 38080 39280 44407 34737 36181 35385 38384 37019 41284 39968 41394 39264 35816 41526 36721 35284 37319 36064 34231 37138 38390 42309 36353 37074 35573 34400 40964 42588 37209 34773 36963 36854 40360 36396 38068 37181 35544 33156 41733 42000 36634 37748 37592 41568 36195 34455 41242 34507 35904 41431 38825 37274 37268 38646 37542 35771 35747 41409 33574 32791 36779 35936 39502 35354 42134 34059 42601 32983 39309 42512 34721 40138 38119 36091 40026 38656 38113 42496 34967 33587 40936 34519 42496 42676 36866 39991 39320 37749 38772 41809 35773 33908 42405 33909 35828 41418 39692 38208 37989 33196 33933 33928 41600 42576 37392 39012 39127 36883 39305 34620 36105 41050 41384 34875 39415 42941 36008 33417 39446 37449 36570 41944 41988 43141 35649 33760 39033 33614 35564 34704 39768 40296 40496 36906 33240 35200 39424 41498 38518 42196 39316 34024 34195 36994 35984 33803 41079 39104 38818 42624 41145 43176 37799 40141 35691 33089 33925 41478 34952 42720 37011 37240 39936 41478 41113 40466 35849 37523 38817 37809 33382 38360 40983 38560 40571 41616 41096 38486 38417 41643 34944 35337 40647 43016 40729 39650 38880 33726 39648 37255 40739 41184 42474 43240 34978 37126 34816 38929 42825 37259 39255 39392 43145 36781 35411 37576 36984 34309 38976 41236 35976 33680 34231 35346 36288 39363 34219 32823 42752 41592 38627 38243 41637 35651 36129 38192 36960 38368 35803 35661 40992 34560 35847 41111 38812 42325 37888 39020 33336 34419 42105 36541 43129 40836 42756 37461 33206 38581 35376 38007 34156 37272 41810 35371 40976 36183 41377 35826 40100 36184 40463 36226 42074 36242 41109 35189 41024 35958 40848 34714 42954 39089 35078 39776 35740 39848 33555 38608 34199 38176 42504 36615 40779 34986 41705 40064 36064 41912 37561 41352 38828 41304 35496 37462 41026 36480 41126 38656 34484 40089 34020 38196 42738 38221 41515 34513 40274 36539 35056 41875 38452 40896 42920 35411 42734 38091 35904 38426 33976 37318 42533 34742 33233 38648 36358 42388 35995 36820 41376 36917 35672 38776 33563 37961 40309 34588 35456 35430 37152 34107 38467 32624 37245 39177 34665 33186 36608 34752 42736 37613 39257 40818 37984 39430 37781 35100 41885 41049 37456 39744 35001 34120 41271 39923 34104 40864 34967 42884 37079 38891 35892 36035 34717 39323 37692 41569 39447 37021 39690 42854 35881 38259 41301 34872 33896 37248 36653 39447 42576 36908 40656 39014 34560 34680 38420 35192 34480 32978 38528 39514 36342 42510 39660 28940 37124 38424 32041 38656 38170 40551 33109 39240 35888 38080 41798 40784 37936 37081 39976 34059 34722 38513 39379 41424 39860 33664 35431 39281 39692 18308 36192 34083 32613 38444 42340 34391 37976 40103 38086 44733 39938 36288 43032 39984 37872 32832 39560 37004 34442 35265 41639 42273 36640 35448 37493 41216 36566 40039 36448 33575 42062 32476 39280 41415 36002 34816 37400 43495 41744 40966 43311 37042 35328 33527 37597 33202 36395 37681 39121 40233 39840 43100 34876 35248 41895 35079 33466 40020 42598 39405 39513 41800 40807 39157 41040 40640 41365 33913 33201 34136 38709 39191 40880 43675 39851 37696 37516 37620 35210 37056 42673 39954 37609 41158 37909 35813 37880 37792 35816 40016 33635 39791 34675 41684 39256 38872 36671 38740 37954 35388 36778 36164 34027 32978 34002 39976 39638 37953 33124 33280 42181 36742 35777 36951 35565 35504 33554 32553 41600 37549 36653 40055 37576 41186 38248 39338 41369 35684 38210 37397 35152 33560 34935 42112 34152 34744 33799 37264 42474 42722 40546 37762 40667 41621 34865 37442 36968 36281 32981 42464 41671 36560 37632 36576 41040 42908 40879 36583 37985 37312 40282 42444 42624 36107 35930 40039 41971 42244 36717 34853 37601 39920 32880 42402 40753 39246 35747 35862 33810 35704 34895 37888 33058 39994 42267 36935 42358 41684 40583 38589 41787 41912 39884 39063 41060 41154 41364 36196 35745 36327 38187 43031 33881 36549 32691 33785 37431 36490 37114 33952 43296 39049 41771 41734 36680 43020 42137 38912 43056 41388 36600 40620 33760 40386 42037 38747 38569 41750 34732 42574 37903 42784 34950 39196 36675 41728 37418 37786 39440 36520 41696 33878 34839 36887 38075 34333 34077 36353 41048 37766 36664 40622 36307 39984 36927 37190 38752 33552 34533 32960 39243 38125 42327 38509 41344 37380 38333 40925 34986 39968 34744 39667 37202 33136 38480 33960 37688 41963 36696 42760 37349 42656 38230 33437 38127 33515 38324 42663 39217 33665 37888 42400 38312 35433 39240 34669 37816 32904 37840 42145 37480 42619 37869 38466 37888 42543 34921 39946 36420 41392 35973 34609 39620 37414 41540 38882 40960 37504 37861 42288 35053 41031 34894 42206 37060 35143 39100 36940 40521 33728 35973 41712 40064 36224 39708 41536 43244 34183 36064 40381 34593 37196 39633 42500 40448 38608 36496 35690 38848 37948 35392 35584 34764 42560 38891 36614 41480 35719 36512 37298 34953 39408 42912 42995 34516 39234 40567 38571 41617 35345 37127 38441 33618 35781 41297 38968 38819 40199 42889 34936 42354 38960 34604 36269 41608 35397 37111 42176 34824 35740 42922 39195 33504 37632 40661 36769 37386 42418 33145 34688 33434 39756 42773 37296 40445 39216 37704 38844 41758 35685 35664 39104 42536 35680 41944 41898 36022 36704 40774 40984 34688 37264 41136 35702 37456 41201 41600 38333 35596 36472 41548 38036 37818 39778 41149 40050 33714 35338 40630 36617 37703 40945 40435 36888 35952 41188 36864 38656 33691 33890 38336 40873 33947 41961 37702 38323 33281 35746 37802 40742 36400 41760 40117 33842 42886 40597 42731 40508 35329 41559 41909 34372 37651 42663 38568 33330 34442 34448 26253 33849 40682 36297 38531 36332 39830 34534 33031 38679 45556 38705 43531 34816 39384 18327 38409 34467 31831 39383 41600 35117 39218 41431 35500 39404 42176 37122 42268 39521 38157 31208 33776 32480 36053 36273 35761 38084 40148 40064 45848 39584 42401 40390 41808 42006 35116 41687 39845 39597 38568 37618 32928 40984 34475 37408 34944 43137 39002 35349 41095 36419 37891 34050 38919 38166 37031 42370 43031 38585 38912 38441 38296 36263 39018 43182 36256 38146 39968 41957 38738 33680 34802 41848 42510 38741 34631 33112 38464 34279 32629 41105 38831 38423 39828 34166 39185 39684 36467 35271 38994 38672 34749 38637 38264 34512 34203 38073 40665 42997 39243 38825 35027 38324 36026 35820 42284 39777 35236 38327 32855 38242 33964 42795 35269 40256 37316 42006 36049 35816 32530 32712 38432 35442 42339 39197 33545 32729 38199 40488 40672 37289 35133 36244 40326 37784 38566 36672 32661 38096 32752 33911 35401 41477 42424 35399 34935 37220 42377 37012 38135 38547 40647 39723 43088 36214 42377 42289 34368 35605 35013 36704 33399 34290 34704 42699 34639 36820 40609 39076 34348 36848 42193 33888 42269 
22922 23417 22721 23153 22819 23399 22965 23537 22812 23081 22846 23545 23345 23856 23074 23092 22944 23160 22999 23296 23205 23566 22999 23069 22759 23383 23325 23693 23405 23623 23181 23136 22796 22610 22441 22731 22752 22973 22846 23392 23387 23536 23002 22798 22577 23349 24036 23964 22848 22521 22881 23478 23049 22477 23352 24102 23383 22481 22893 23276 23249 22834 23447 23413 23173 22735 23159 23139 23112 22836 23499 23449 23027 22917 23183 23136 23100 22821 23744 23109 22955 23250 23325 22855 23474 23337 22970 22861 23351 22752 23731 22611 23138 22869 23290 23156 23405 22984 23005 23371 22996 22789 23343 22793 23698 22540 23399 22956 23271 23186 22932 22812 23491 22580 23575 23109 23159 23072 23408 22884 23191 23175 23486 22664 23140 22951 23308 22576 23767 23170 23048 23059 23336 22935 23053 22825 23570 23208 23088 22640 23113 23040 23104 22656 23532 23265 23440 22679 23246 23989 23794 23654 22980 23913 24518 23946 22880 23214 23875 23799 23277 23190 23940 24736 23733 23105 23511 24162 23517 23189 23448 24618 24323 23626 22964 23777 23917 23093 23185 23317 24353 24555 23440 46 8574 10614 12075 12647 14301 14797 15445 15130 16532 32913 28252 26502 26396 25932 25504 24776 24938 24795 24690 24174 24476 24689 24587 23949 24385 24149 24322 23764 23920 24164 24594 23836 24014 24001 24152 23657 23987 24131 24374 23453 24105 23859 24049 23485 23822 23745 24448 23541 23909 23671 23989 23416 23844 23879 24424 23285 23873 23573 24146 23305 23776 23720 24301 23426 23749 23668 23928 23484 23612 23598 24295 23475 23760 23425 24211 23445 23892 23064 24164 23735 23741 23232 24070 23501 24102 23084 23943 23931 23910 23195 23889 23581 23804 23173 23820 23722 24146 23115 23748 23525 23931 23285 23683 23712 24165 23309 23605 23439 23769 23432 23478 23487 24149 23415 23536 23524 23845 23417 23464 23601 24121 23382 23625 23397 23864 23345 23289 23425 24064 23629 23482 23343 23805 23349 23402 23288 24166 23730 23274 23348 23904 23444 23349 22923 23816 24410 23887 22791 23664 23833 23406 22885 23179 24256 24310 22849 23309 23799 23457 22917 22933 23746 24528 23393 22842 23564 23733 23245 22769 23755 24531 23568 22780 23641 23671 23232 23084 23607 24440 23403 23377 23657 23330 23271 23508 23994 23209 23441 23424 23521 23129 12088 16135 18149 18581 19004 18671 18684 18724 19243 19200 27284 25852 25432 24688 24788 24155 24312 23977 24437 24251 24544 24276 24471 23988 24128 23573 23878 23542 23946 23664 24135 23688 24103 23701 24023 23609 23991 23561 23878 23493 23820 23808 23888 23156 23740 23227 23632 23070 23633 23080 23937 23433 24149 23641 24205 23780 24080 23593 23783 23291 23548 23072 23577 23258 23726 23451 24032 23415 23809 23265 23793 22690 23589 23265 23565 22970 23644 23327 23997 23636 24046 23447 23835 23223 23446 23136 23410 23224 23824 23473 23939 23385 23856 23179 23580 23165 23577 23029 23449 22944 23462 23105 23522 23110 23616 23366 23766 23488 23909 23481 23744 23401 23488 22969 23404 23532 23588 23383 23555 23078 23767 23602 23446 22880 23529 23368 23271 23567 23808 22962 23418 23238 23528 23568 23104 23276 23111 24045 22986 23312 23171 23783 23249 23191 23226 23733 23495 22883 23104 23833 23106 23118 23035 24200 22794 23508 22823 24207 22862 23725 23472 23269 23315 22612 24336 23110 22720 24185 22998 22809 24357 22920 23476 23966 22763 23727 23372 22702 23785 23349 23288 23466 22565 23675 23146 23379 23527 23175 23190 23322 23302 2008 18540 19538 19483 19918 19936 20421 19905 20370 20269 27494 25101 24755 24399 24087 24302 23898 23762 23835 24049 23730 23736 24054 23299 24238 23425 23784 23552 23490 23671 23957 23073 23707 23521 23559 23747 23719 23223 23686 23387 23397 23415 23976 22976 23560 23383 23618 22975 23917 23577 23608 22929 23582 23233 23767 23053 23469 23334 24035 23375 23593 23091 23503 23111 23731 23215 23376 22951 23751 23508 23985 23209 23347 22794 23610 23015 23491 23144 23552 22948 23360 22817 23371 22945 23529 23160 23784 23367 23872 23498 23887 23351 23738 23287 23719 23409 23798 23357 23859 23329 23880 23416 23912 23430 23988 23467 24023 23430 23833 23392 23757 23328 23671 23068 23303 22823 23184 23030 23509 23193 23466 23041 23331 23032 23403 22902 23126 22984 23610 23525 23778 23216 23241 22863 23367 23174 23575 23072 23501 22880 23116 22935 23496 23473 23776 23521 23360 22775 23009 23142 23565 23253 23169 23043 22835 22501 23309 24013 24071 23055 22593 22716 23670 23517 23095 22726 22597 23040 23982 24105 23632 22489 22841 23427 23340 22422 22638 22618 23816 24065 23296 22472 22736 23436 23251 22901 22490 23197 24072 23787 22919 22714 19664 20631 20442 20736 21039 21696 21364 21272 21068 40040 24576 23834 23479 23843 23901 23736 23191 23505 23489 23515 23088 23369 23669 23908 23168 23245 23286 23453 23245 23104 23260 23872 23224 23222 23184 23381 23463 23067 23350 23808 23250 23252 23117 23493 23116 23192 23399 23559 22781 23523 22964 23210 22736 23724 23396 23310 22919 23527 22936 23079 22992 23828 22939 23203 23054 23609 23253 23166 23225 23675 22679 23449 22999 23357 22644 23721 23273 23191 23044 23462 22970 23048 23158 23617 22597 23348 22937 23159 22634 23779 23148 23143 23001 23513 22796 23079 23114 23721 22778 23353 23029 23312 22658 23655 23123 22996 22929 23319 22637 23130 22961 23818 22784 23457 23065 23336 22608 23548 23193 23231 22934 23483 23271 23024 23126 23693 22731 23384 22993 23240 22895 23705 22958 23132 23063 23432 22713 23642 23213 23096 22930 23360 22737 23241 23454 23141 22879 23374 22820 23147 23419 23143 22758 23363 22500 22852 23361 23620 22673 23493 22887 22577 23601 23524 22352 23540 22885 22461 23265 24075 22784 22729 23401 23359 22938 22535 23452 24155 22880 22593 23332 23313 22885 22984 22408 22442 22457 23084 23303 23072 23214 19075 22173 22523 22672 22986 22843 23074 23000 23189 23049 25015 23496 23253 23316 22982 22957 22750 23014 22948 23229 23116 23420 22999 22973 23080 23656 23280 23013 23034 23360 22729 23400 23373 22912 22894 23457 22844 23648 22574 23340 22670 23741 22743 23388 22833 23425 22899 23032 23115 23379 22889 23076 23040 23627 22560 23037 22566 23245 23171 23380 23240 23255 22901 23385 22576 23005 22665 23257 22960 23497 23016 23694 22832 23744 22737 23482 22739 23084 22582 23223 22978 23440 23264 23341 22796 23061 22604 23394 23026 23755 22780 23366 22536 23279 23083 23346 22769 23053 22845 23549 22769 23124 22559 23287 23225 23271 22980 23063 22825 23536 22734 23404 22468 23251 22985 23393 23089 23114 22537 23353 23058 23625 22739 23042 22600 23355 23275 22584 22642 23256 22991 23201 22619 23346 23226 22897 22995 23546 22753 23207 23333 23008 22945 23559 22694 23297 23144 22893 23005 23265 22798 23213 22606 23605 23016 23272 23362 22598 23127 22591 23760 22631 23265 22701 23680 22588 23399 22523 23841 22405 23226 22504 23746 22478 23025 22931 23065 23534 22528 23248 22632 23440 23560 22473 22982 22893 22983 23975 22343 22831 23421 22364 23530 23752 22279 22955 23341 22423 23344 23925 22540 22647 23193 22915 22933 23244 23387 22584 23069 22858 23312 22888 22784 23042 23490 22842 22893 22691 23066 23160 23117 22694 22998 23137 23569 23180 23127 22819 23060 22711 23236 22868 23159 22714 23091 23040 23453 23169 23536 22780 22882 22443 23145 22560 23186 22838 23328 22927 23386 22967 23206 22827 22993 22508 23015 22713 23512 23129 23588 23160 23535 23080 23617 23105 23600 23030 23636 23048 23434 22800 23432 22960 23512 23058 23523 23125 23613 23104 23650 23143 23482 22954 23266 22696 23129 22570 23056 22608 23172 22855 23356 22918 23288 22743 23368 22473 22928 22582 22894 22567 23079 22780 23360 23096 23708 23061 23394 22720 23049 22511 23040 22831 23340 22880 23366 22825 23093 22936 22960 22574 23249 23197 23528 23160 23268 22583 22967 22713 23316 22928 23136 22838 22862 22552 22976 22995 23407 23248 23281 22649 22886 22965 23248 22873 22820 22411 22862 23092 23756 23641 23352 22308 22564 23015 23400 22839 22780 22293 22756 23565 24045 23225 22436 22460 22816 23351 23169 22794 22558 22307 23360 23855 23744 22639 22416 22952 23389 23137 22935 22515 22231 22676 23695 23943 22813 22885 22814 23282 22721 23261 22419 23394 23235 23252 22649 23169 22936 23000 22625 22897 23168 23406 22726 23053 22989 23136 22916 22848 22897 23548 55 10737 13065 14646 14518 15322 15656 15832 15211 16217 30232 27120 25479 25793 25353 25096 24231 24883 24199 24496 23946 24790 23974 24073 23933 24331 23940 12699 17318 18218 17457 18662 18108 18492 18378 19246 18468 27057 25824 25586 24539 24724 24630 25092 23971 24684 24017 24646 23592 24693 24134 24244 23591 24257 18405 19309 19862 20634 19680 20586 20130 20428 19937 35021 25746 25033 24461 24750 23988 24160 24301 24374 23628 24281 23756 23758 23764 24407 23525 23911 23700 21041 20669 21787 21439 21447 21490 21657 21208 21898 26922 24664 24056 24208 23914 23495 24416 24336 23133 24107 23599 23282 23734 24716 23955 22957 23640 19239 21899 21960 23148 22990 21736 22439 22658 22346 21732 24890 24715 23425 22994 23746 23831 22822 22884 23351 24377 23789 23414 23141 23736 23300 23587 23439 23204 23207 23718 23563 23790 23663 23569 23055 23326 23127 23692 23350 23555 23106 23521 23119 23927 23207 23404 23181 23616 23223 23350 22979 23894 23332 23215 22780 23648 22973 23507 23480 23136 23016 23618 23079 23320 23008 23367 23339 23527 22821 23801 23040 23255 23288 23450 22827 23719 23096 23304 23200 23495 22748 23520 22970 23252 23019 23416 22864 23637 22969 23208 23174 23377 22792 23767 22928 23314 23393 23488 23060 23752 22646 23527 22796 23719 22983 23564 22928 23578 22873 23468 23081 23520 22949 23239 23206 23513 23060 23556 22827 23689 22805 23272 23110 23313 23543 22637 23089 23456 22619 24039 22412 22993 23428 22550 23861 23504 22482 23150 23255 22543 23913 23697 22422 23116 23483 22688 23191 24040 22807 22876 23040 23583 22762 22333 23449 23432 23440 22742 23201 22919 23308 23232 23251 22752 23191 23287 23648 23146 22947 22834 23195 23068 23431 22983 23088 22680 23269 23204 23648 23296 23162 22549 23115 22816 23251 22913 23280 22870 23371 23079 23489 22971 23405 22924 23313 22753 23224 22653 23063 22596 23024 22651 23058 22670 23061 22608 23077 22511 23088 22612 23112 22557 23110 22679 23137 22771 23040 22671 23126 22597 23085 22543 23136 22701 23208 22963 23391 23046 23304 23058 23284 22893 23236 22864 23542 22727 22902 22606 22972 22829 23320 23160 23563 23223 23747 23287 23528 23040 23034 22558 22596 22599 23255 23370 23571 23385 23183 22681 22620 22306 22657 23118 23909 23912 23795 23168 22508 22317 23067 23402 23267 23129 22989 22776 22630 22880 22935 23494 23247 23396 22743 22909 22944 23401 23065 23064 22984 22885 22761 23417 23280 23370 22697 23156 23072 23228 22812 23051 22476 23345 23163 23570 22906 22994 22749 23392 22839 23304 22516 23218 23154 23582 22656 23071 22800 23421 22754 23330 22535 23304 23176 23437 22565 23108 22937 23310 22743 23048 22766 23424 23209 23425 22471 23114 22999 23172 22548 22995 22953 23642 22838 23034 22647 23339 22787 23158 22501 23496 23201 22980 22768 23351 22787 23032 22840 23581 22935 22924 22961 23344 22874 22992 22773 23593 23139 22712 22915 23328 22785 22372 23458 23946 22753 22535 23273 23274 22758 22405 23256 23962 22860 22383 23191 23065 22670 22537 23798 23795 22966 22458 23358 22887 22677 23000 23501 22662 22971 23040 23088 7771 12207 14615 14576 14539 15318 15107 15246 15492 43648 27751 26324 25514 25511 24723 13203 17721 18474 17815 18520 18326 18735 18205 19297 18769 27488 25934 25837 24856 24848 12454 20124 19580 20449 20231 20695 19941 20807 20724 20787 26600 26005 24665 24821 24332 25015 20548 21606 21520 21892 21259 22206 21917 21719 21610 27544 24619 24533 24458 24682 23593 22336 22368 22779 22313 23265 22576 22784 22576 22880 22452 24363 24177 24256 23574 24137 23591 23634 23577 24326 23508 23596 23649 23801 23460 23573 23780 23905 23257 23847 23436 23312 23344 24563 23253 23241 23905 23508 22747 23732 24404 23347 22882 23933 23245 22841 23862 24357 22830 23328 23592 23335 22852 24284 23708 22819 23641 23405 22880 23417 23873 23201 23388 23353 23416 22934 23161 23541 23629 23015 23525 23130 23125 23335 23869 23020 23468 23160 23552 22906 23832 23365 23111 23111 23511 23196 23116 23320 23816 22842 23456 23235 23340 22752 23703 23415 23445 22821 23611 23003 23273 23116 23817 22970 23304 23170 23367 22703 23538 23402 23369 22798 23547 23089 23435 22706 23269 23240 23824 23056 23163 22731 23556 23091 23401 
22793 22265 21904 22408 22656 22493 22528 22077 22341 22646 23139 22933 22598 21911 22418 22189 22568 22190 22896 22374 22336 22027 22477 22371 23116 22567 22948 22126 22480 21864 22277 21945 22583 21955 22691 22101 22728 22123 22929 22134 22744 21852 22532 22094 23040 22564 22886 21649 22603 21958 23043 21856 22581 22331 23270 22147 22400 22089 22808 22077 22397 22322 23212 21815 22934 22027 22990 21818 22649 22421 23218 21577 22467 21968 22891 21920 22672 22532 22849 21752 22717 22231 22466 22155 23113 21682 22635 22153 22355 22521 22465 22007 22727 21865 23360 21319 22891 21356 23539 21607 22290 22236 22103 23207 21667 22048 22578 21732 23537 21123 22336 22567 21611 22990 23069 21306 22224 22601 21775 22009 23780 22485 21809 22328 22325 22353 22018 23026 22488 22107 22193 22523 22329 22144 22465 22952 22386 22109 21984 22554 22317 22300 21921 23000 22593 22183 21998 22507 22172 22849 21901 22333 22169 23073 22423 22618 21681 22592 22203 22874 21765 22405 22196 23124 22331 22784 21650 22472 22128 22605 22150 22824 22055 22353 21786 22912 22286 23170 22153 22689 21661 22489 21705 22581 21951 22587 85 199 60 83 78 72 78 36652 32079 28224 26880 25344 25217 23435 23033 22037 22727 21367 21440 20930 22007 20910 20775 20312 21003 20248 20749 19743 20923 20461 20295 19815 20681 19729 20139 19609 20761 20027 19954 19639 20424 19509 20160 19096 20419 20279 19993 19255 20377 19720 19877 19028 20817 20334 20093 18697 20304 19772 19847 18833 20751 20821 19847 18773 20366 19848 20034 18752 20369 20864 20283 19111 19287 20077 20264 19447 19180 20225 21177 19668 19202 19904 20303 19712 19136 20023 20920 20072 19525 20084 19859 20118 19435 20130 20213 20432 19648 19820 20133 19974 19713 19898 20234 20453 20043 19840 19971 20105 19615 19898 20022 20739 19812 19865 19917 20293 20011 19952 20344 20871 19915 20071 20004 20519 19790 20224 19821 20935 20179 20080 19683 20579 19840 20020 19862 20952 20073 20156 19925 20748 19808 20338 19488 20790 20352 20780 19534 20694 20033 20630 19672 20518 20359 21024 19677 20555 20183 20613 20035 20335 20216 21160 19865 20326 20118 20843 19970 20332 20178 21128 19995 20595 20291 20768 20059 20320 20319 21177 19781 20803 20293 21088 19773 21274 20570 20832 19908 21031 20125 0 118 80 80 2586 3725 5627 5455 6603 43612 37955 32487 30289 27780 26861 25168 25111 23876 23678 22757 23232 22610 23282 22714 23123 22386 22595 21646 22192 21240 21929 21038 21824 21197 21888 21191 21879 21383 21959 21527 22053 21447 21873 21360 21783 21234 21581 20953 20709 20754 20744 20167 20659 20296 20959 21178 22146 22103 22600 22212 22392 21965 21649 20791 20537 20180 20759 20817 21808 21419 21832 21335 21405 21217 21229 20886 20583 20199 20454 20651 21742 21862 22222 21862 21374 21537 21175 21139 20715 21047 20644 21050 20954 21485 21273 21389 21225 21213 20986 21599 20889 20984 20971 21019 20701 20929 20675 21047 20614 20956 20653 21073 20611 21756 20924 21530 21181 21047 20823 21911 21272 21160 20993 21518 21114 21211 21160 21657 20453 21333 21076 21422 21411 21094 20940 21383 21170 21528 20311 21686 20876 21847 20758 21813 20865 21894 20686 21845 20743 21903 20715 21809 20937 21521 20773 21523 21307 21223 20877 21231 21343 21576 21088 21940 20447 21774 21164 21329 21047 21756 20537 21664 20589 21849 20825 21381 21304 21685 20741 22037 20997 21577 21331 21181 21005 21536 21029 21569 20719 22132 20471 113 1521 7421 8391 10994 10915 13252 13048 14027 13258 38512 31335 29162 26132 26480 24226 24592 23463 23955 22976 23301 22704 22807 22672 22752 22023 22839 21617 22743 22235 21997 21851 22475 21415 22855 21916 22167 21703 22267 21268 22584 21863 21600 21657 22317 21087 21945 22363 22349 20705 21537 21413 22319 21141 20947 21616 23056 22311 21712 20535 21382 21621 22413 21459 21080 20768 22164 22605 22786 21571 21045 21060 21291 21411 22063 22029 22108 20931 21043 21265 22181 22122 22875 22728 23126 22637 22621 22068 22141 21641 20860 20708 21199 21380 21170 21309 21024 21390 21097 21335 21192 21555 21150 21435 21452 21771 21507 21571 21744 21866 21854 22026 21975 22305 22085 21946 21443 21563 21053 21573 21369 21953 21504 22001 21436 21771 21389 21565 21113 21787 21623 22196 21715 21959 21063 21684 21163 22018 21496 21944 21364 21771 20994 21680 21451 22263 21875 22199 21184 21560 21262 22151 21512 22140 21223 21966 20949 21915 21641 22412 21396 21791 20966 22023 21432 22011 21111 21649 21167 22035 21813 22349 21161 21808 21431 22058 21113 21935 20936 22329 21615 22252 21031 21844 21414 22112 21180 21702 21265 22476 21784 21920 7296 12589 13891 14813 15224 17023 16839 18041 16962 36524 29249 27195 24755 24506 23447 24319 22937 23047 22365 23299 22109 22689 22014 22881 22327 22421 21605 22600 21881 22272 21379 22427 22234 22377 21414 22482 21772 22345 21334 22281 22113 22473 21329 22250 21641 22048 21498 22699 21771 21957 21794 22245 21369 21642 21880 22683 21265 21892 21832 22021 20938 22288 22774 21930 20716 21836 21897 21651 21032 23141 22312 21160 21556 22280 21484 21372 22485 22523 20736 22172 21688 21825 20823 22856 22405 21218 21808 22155 21166 21463 22675 22464 20753 21543 22172 21770 20776 22460 22647 21180 21658 22165 21469 21497 22371 21992 21654 21745 21997 21600 21671 21923 22299 21383 21845 21975 21271 21285 22198 22272 21598 21937 21928 21697 21625 22200 22099 21344 22121 21648 21688 21672 22588 21591 22127 21729 21925 21524 22497 21991 21665 21792 22011 21216 22260 21988 21869 21731 22131 21317 22393 22033 21941 21547 22257 21437 21895 22069 22181 21368 22283 21712 22044 22044 22138 21345 22309 21345 21863 21824 22675 21239 21961 21646 22277 21412 21802 21800 22599 21401 22000 21765 22309 21540 22213 21319 22264 21072 21888 21014 22016 12329 16614 17191 18781 18533 19558 19259 20072 19468 20151 26019 24647 23095 23272 22285 22936 21984 22820 22085 22983 21820 22260 21626 23095 22261 22488 21293 22519 21910 22171 22009 22833 21275 22236 21965 22071 22082 22074 21703 22253 22146 22137 21667 22114 22153 22061 21912 22677 21535 22136 22139 22279 21413 22035 21888 22683 21538 22320 21460 22004 21269 22140 22117 22618 22726 22279 22535 21575 21723 21920 20919 21346 20910 21371 21601 22768 22294 23224 21784 22657 21541 21287 20974 22085 22510 22454 22613 21779 20931 21255 21393 22844 22008 22549 21037 21606 22749 22239 21760 21202 21777 23242 21769 21821 20942 21908 22316 21984 22261 21527 21926 22043 22122 22119 21989 21607 22193 21953 22426 21948 21699 21996 22285 22352 22087 21675 21852 21968 22621 21841 21978 22155 22000 21555 22327 21781 22000 21761 22109 21844 21927 21936 22124 21633 22224 21325 22456 21742 22006 22113 22277 21824 22694 21376 22384 21459 22365 21669 22150 22128 21976 21610 22010 22103 21920 21681 22152 22113 22093 21552 22307 21738 22536 21613 22519 21582 22889 21380 22400 21641 22202 22053 21942 21494 22325 21323 22771 21276 22405 21787 22168 21801 22691 21101 22272 21728 22009 21882 22701 21383 22272 21922 22163 21699 22933 21869 21964 21559 22478 21700 22176 21491 22762 21893 22167 21687 22300 21641 22599 21495 22000 21848 22809 22073 22247 21335 22439 21659 22482 21867 22169 21393 22144 22021 22798 22079 22614 21810 21912 21416 22656 21607 22436 21899 22477 21959 22297 21508 22007 21383 22042 21671 22672 22372 23236 22925 22871 22124 22436 21808 21666 21355 21472 21072 21394 20953 21453 21089 21353 21052 21213 21061 21174 21003 21483 21154 21671 21750 22406 22500 23133 22944 23346 23056 23332 22861 22835 21632 21547 20898 21357 21397 22371 22378 22558 22126 21864 21988 21849 22198 21883 21845 21459 21952 22045 22385 22555 22562 22385 22178 21905 21765 21789 22055 21898 22325 22003 22172 21811 22002 21504 22087 21973 22707 22461 22681 21896 21975 21632 22336 22166 22461 21864 22169 21792 21991 21770 22653 22352 22631 21624 21984 21641 22523 21751 22291 21463 22112 21568 22769 22272 22760 21717 22153 21753 22629 21778 22421 21415 22176 21944 22845 22008 22224 21533 22196 21991 22499 21649 22260 21329 22437 22055 22854 21583 22209 21472 22519 21824 22340 20891 22105 21473 22679 22186 22498 21479 22366 21905 22574 21652 22157 21760 22987 21841 22304 21697 22576 21701 22158 21490 22880 22135 22254 21617 22565 21892 22508 21468 22484 99 85 86 1349 3504 5483 6479 8487 8128 9243 43677 40974 34634 31706 29588 29193 27062 26471 25927 25726 24261 24885 25468 24518 23093 24035 23930 65 460 7487 9265 10395 12495 13206 12909 14587 43629 42960 34404 32160 29695 27991 26277 27345 26287 24615 24853 25090 24072 23705 24334 25283 23344 23124 3326 8983 11911 14274 15626 15589 16934 16900 17504 43674 35915 30979 28549 27234 26419 25426 25273 25125 24681 23906 24474 23795 23588 23811 24115 23079 3492 11186 14724 16089 18249 17906 18825 18874 19492 18826 35676 29760 27381 25865 25664 24367 24576 24220 24256 23209 24165 23102 23412 23342 24051 22976 23304 14040 17832 18551 19899 20357 20920 19949 21248 20501 21402 26960 26512 24597 24443 23123 24109 23143 23572 22720 23285 23129 23779 22608 22984 22473 23492 22456 23253 22232 22863 22033 23085 22620 23606 22711 23021 22161 22637 22136 23056 22517 23015 22441 23065 22384 23004 22542 22656 21870 22985 22621 22921 21866 22734 22250 22550 22352 23399 21681 22619 22408 22336 23018 22807 21847 23655 21397 23056 23180 21762 22450 23662 21678 22516 23477 22317 21957 23751 21661 22201 23300 22368 21784 23818 21900 22051 23425 22057 21998 22799 22215 22304 23063 21788 22745 22400 22235 22357 22272 22472 22492 22055 22919 21744 22580 21923 22919 21879 22785 21969 22835 21850 22652 21927 22822 21794 22731 21720 23127 21964 22505 22189 22412 22552 22321 21943 22820 21605 23141 22041 22634 22119 22382 22224 22905 21635 22557 22146 22263 22439 22870 21632 22564 22172 22561 21917 23171 21606 22640 21941 22935 21736 22569 22324 23032 21959 22141 21939 22767 21992 22805 21591 22504 22074 23143 22261 22652 21785 22432 22026 22730 21963 22363 21715 22647 22417 23035 22380 22466 21685 22438 21888 22576 21948 22737 22178 22705 22151 22326 21671 21710 21411 21595 21209 21750 21544 22295 21962 22583 22496 23029 22728 23068 22949 23175 23106 23350 22872 23292 23137 23241 22896 23088 23237 23446 22944 22499 22826 22480 22752 22265 22617 22311 22316 22134 21989 21911 22225 22106 22520 22063 22599 22145 22589 22157 22401 22068 21762 21928 22157 21673 22219 21573 22369 22144 22967 22398 23046 22446 22855 21946 22458 21555 22455 21801 22583 22044 22699 21814 22500 21672 22119 21673 22737 22300 23202 22276 22713 21552 22554 22089 22729 22137 22733 21793 22430 21507 22378 22018 23278 22232 22669 21504 22365 21733 22867 21972 22064 21696 22272 22196 23062 22273 22396 21734 22616 22161 22497 21781 22213 21745 22953 22534 22887 21623 22253 22263 22666 21955 21776 21618 23329 23201 22903 21303 21890 22554 22550 21575 21646 22129 23395 23121 22003 21435 22366 22547 22217 21400 21522 22195 23430 22724 21897 22276 22301 22473 22021 21984 22481 22771 22414 22149 22020 22555 22126 22227 21774 22832 22408 22245 21969 22591 21925 21993 22007 22921 22105 22231 21750 22700 21977 22285 21895 22967 22138 22299 22033 22692 21772 22253 22272 23095 21632 22486 22075 22650 21920 22247 22117 23008 21867 22454 22023 22678 21643 22589 22230 23071 21835 22571 22027 22520 21731 22972 22312 22448 21656 22903 93 145 571 5543 6284 8550 9244 10453 10242 43668 43690 39204 33367 31397 28984 98 5255 11051 12544 13980 14781 15955 15631 16653 43632 43691 36275 32962 30519 28989 232 11146 14587 15193 16605 18472 17984 17965 18903 20398 40435 33449 30885 28855 26672 7630 14852 16512 17923 19609 19039 19257 20887 21351 19624 36422 31079 28195 27035 26519 26007 17634 20281 20810 21004 21507 22167 21793 21470 21837 31280 27095 26224 25466 24944 24134 24733 23898 23705 23847 24439 23314 23681 23448 23767 23078 23527 23480 23648 22493 23703 22756 23076 22954 23811 22486 23304 22768 23280 22227 23654 23024 22969 22592 23235 22238 22812 22854 23415 21946 23360 22464 22999 22150 23593 22402 22856 22528 23028 22101 23311 22698 22695 22215 23160 22203 22932 22049 23495 22117 22704 22422 22793 21804 23168 22622 22613 22496 22972 22085 22759 22674 23045 21946 22775 22251 22551 21889 23164 22683 22712 22226 22941 21888 22053 22280 23713 22196 22072 22744 22439 21332 22860 23401 22257 21820 23074 22003 21601 22753 23608 22097 21755 22104 22904 22103 22074 21370 22839 23545 23448 22097 21475 22358 22459 
