# Supplementary material for: An Active Feature Selection Strategy for DWT in Artificial Taste
Source: Hindawi journal article supplement (doi:10.1155/2018/9709505), 2018-01-01
Supplement: f1 [file 9709505.f1.zip › blackTea-hi-2.txt]

43480 43489 43480 43490 55 47 14812 18760 20889 20605 21884 21668 22684 22165 23131 22199 23106 21913 22592 21985 22961 22344 23002 22169 22824 21953 22862 22461 23352 22795 23184 22051 22811 22437 23242 22196 22911 22082 23022 22598 23496 22564 22806 22301 23205 22634 23034 22440 22686 22422 23492 22575 22924 22144 23172 22533 23040 22176 22871 22322 23387 22933 23175 22252 23041 22665 23014 22476 22784 22776 23411 22663 22860 22560 23136 22725 22995 22432 22792 22774 23393 22545 22793 22689 23168 22537 22784 22072 23001 23228 23219 22227 22648 22935 22963 22416 22176 22860 23863 23296 22287 22357 23328 22515 22460 22384 23681 23308 22146 22478 23237 22594 22567 22186 23610 23344 22261 22661 23141 22515 22140 23225 23641 22283 22109 22892 22955 22317 22249 23126 23010 22655 22777 23021 22672 22777 22936 23405 22553 22753 22894 22871 22387 23092 22998 22862 22569 23097 22699 22634 22764 23415 22487 22957 22660 23124 22263 23346 22874 22798 22832 23158 22417 22882 22966 23021 22316 23272 22480 22784 22761 23389 22284 23185 22350 22845 22447 23553 22568 22871 22628 23023 22157 23498 53 15766 18573 20331 19844 21092 19809 21033 20256 20676 31620 25857 23712 24261 23344 23698 22952 23969 22611 23485 22912 23512 22615 23897 22641 23384 22722 23313 22518 23798 22733 23095 22806 23237 22530 23674 22841 23031 22748 23193 22178 23524 22822 23170 22752 23175 22171 23596 22685 22922 22641 23033 22262 23460 22721 22873 22707 23069 22374 23427 22700 22785 22796 23086 22311 23488 22665 22893 22712 23040 22231 23319 22816 22806 22659 23090 22265 23543 22520 22953 22704 22457 22327 23878 22193 23060 22569 22209 23497 23217 22065 23344 22778 22417 23511 23432 21960 23370 22570 22105 23413 23129 22078 23201 22584 22212 23434 23197 22114 23208 22633 22190 23634 22957 22297 23243 22631 22155 23649 23136 22608 22825 22962 22416 22898 22957 23253 22390 23081 22708 22778 22433 23210 23004 22725 22547 23032 22821 22976 22555 22705 22838 23500 22709 22864 22407 23200 22714 23111 22560 22657 22325 22915 22666 23330 22940 23565 22912 23521 22900 23505 22896 23363 22576 22880 22473 23164 22638 23152 22263 23303 22798 23401 22196 23112 22388 23224 22544 23074 22080 23175 22698 23524 22691 23143 22174 23018 22411 23324 22432 23168 22810 18448 20095 21399 20916 21657 21548 21722 21394 21818 38289 24919 23764 23776 23259 23506 23036 23680 22814 23376 22477 23783 22306 23496 22704 23095 22685 23371 22614 23260 22319 23372 22769 23040 22635 23133 22349 23418 22481 23168 22894 22889 22784 22871 22944 23033 22454 23418 22340 23172 22439 23403 22289 23076 22543 23393 22378 23092 22407 23284 22798 22797 22935 22457 23479 22784 22327 23196 22054 22912 23537 22166 22477 23137 22073 23823 23130 22053 22753 22987 22803 22128 23013 23798 22724 22076 22605 23064 23002 22523 22132 22805 23568 23799 23191 22478 22096 22272 22715 22688 23018 22730 23192 22580 23017 22463 22727 22351 22679 22538 22784 22576 22848 22599 22778 22528 22808 22352 22762 22327 22752 22273 22748 22313 22893 22312 22832 22432 22736 22267 22775 22336 22867 22352 22988 22445 23160 22664 23318 22689 23178 22441 23141 22414 23104 22368 23114 22134 22903 22113 23046 22583 23473 22733 23628 22456 23054 22137 22980 22464 23296 22533 23171 22430 23204 22282 22856 22588 23529 22823 23319 22279 23031 22212 23208 22517 23144 22353 22984 22066 23053 22743 23521 22584 22676 22361 23042 22562 23068 21752 22983 22048 17092 20951 22311 21432 21902 21581 22516 21608 22137 21529 25200 23587 24048 23256 23249 22513 23229 22976 23159 22585 22853 22891 23588 22870 22970 22380 23192 22790 23012 22435 22861 22851 23479 22788 22732 22391 23246 22674 22784 21952 23028 23488 23172 21940 22861 23019 22620 21944 22313 23318 23752 22151 22309 23117 22957 22144 22307 23290 23680 22372 22320 23100 22784 22337 22199 22882 23872 22728 22140 23016 22837 22222 22504 23349 23526 22388 22600 23000 22416 22680 22862 23397 22608 22792 22722 22912 22384 23193 23052 22762 22651 22864 22519 22873 22989 23176 22345 23097 22509 22664 22865 23332 22312 23187 22569 22761 22692 23542 22382 23063 22711 23175 22312 23495 22308 22983 22493 22836 22641 23432 22292 23186 22422 22908 22788 22838 22532 23068 22119 23424 22472 22953 22491 22960 22406 23632 22294 23118 22471 23108 22269 23446 22317 23010 22441 22889 22478 23458 22129 23308 22293 23095 22776 23028 22529 23081 22100 23274 22812 22890 22492 22902 22678 23330 22250 23191 22423 23365 22590 22946 22508 22955 22561 23584 22080 23265 22428 22960 22826 22869 22596 22938 22503 23353 22254 23096 22392 22636 22945 22993 22567 22969 20650 22468 21795 22340 21874 22107 22439 22508 22150 26293 22870 23864 22567 23332 22624 22633 23329 22615 22766 22967 21878 23876 22429 22720 22677 22201 23441 23127 22356 22945 21968 23616 22788 22637 22613 22070 23655 22281 23014 21979 22609 23441 22092 23137 22320 23210 23159 22391 22824 22105 23553 22783 22819 22669 22240 23786 22652 22803 22717 22787 23448 22361 23144 22457 22794 22964 22707 22709 22717 22880 23069 22560 22919 22314 23268 22356 23039 22540 22592 23008 22776 22636 22836 22456 23296 22320 22994 22263 23515 22372 23218 22809 23059 22847 22843 22642 22662 22491 23337 22296 23090 22243 23341 22600 23079 22455 22698 22823 22896 22560 22971 22088 23506 22144 23270 22106 23502 22261 23334 22128 23169 22673 22804 22583 23148 22642 23323 22345 23177 22131 23528 22157 23298 22329 23287 22616 23063 22344 22804 22690 22836 22543 23015 22732 23068 22641 22896 22151 23496 22057 23352 22272 23500 22349 23255 22381 23136 22608 23072 22393 22889 22806 22808 22640 23028 22460 23369 22279 23152 22421 23191 22557 22969 22489 22791 22840 22769 22597 22859 22870 23192 22489 22929 22286 23399 22248 23276 22445 22960 22913 22850 21225 21760 23151 22009 22592 22050 22592 23085 22110 22551 22338 24045 22248 23356 22272 22694 23338 22222 23040 22753 22894 23413 22400 22976 21980 23872 21845 23144 22076 23675 22364 22677 22579 22450 23592 22093 22956 21950 23271 22336 23149 22589 23040 22823 22922 22551 22584 22999 22705 22818 22634 22994 22958 22720 22800 22696 23393 22252 23026 22284 23291 22425 23086 21893 22918 22899 22757 22715 22834 22591 23228 22342 23059 22050 23385 22236 23269 22505 23212 22563 23011 22416 22766 22861 22790 22620 23189 22515 23292 22361 23079 22077 23532 22090 23289 22193 23217 22736 22994 22417 22787 22735 23076 22490 22970 22190 23517 22210 23146 22276 23464 22407 23287 22285 22871 22742 22897 22517 23084 22556 23318 22396 23011 22183 23310 22247 23200 22229 23252 22549 23051 22475 22976 22649 23290 22464 23062 22257 23356 22186 23098 22324 23016 22801 22880 22596 22773 22770 23188 22387 23001 22256 23394 22382 23028 22380 22685 22935 22721 22737 22921 22560 23276 22378 22928 21994 23407 22394 23004 21895 22688 23232 22244 22863 22233 23475 22891 22248 22723 21817 23660 22048 23132 22290 22999 23085 22597 22688 22087 23418 22570 22923 22692 22668 23179 22282 22723 22096 23835 22055 23244 22677 22546 23644 22306 22981 22299 23305 22415 23104 22481 22784 22983 22659 22892 22729 22663 23088 22486 23036 22216 23336 22385 23084 22515 22985 22733 22860 22480 22788 22761 23112 22386 23005 22219 23270 22233 23192 22424 23191 22649 22952 22440 22720 22816 22864 22580 23089 22608 23308 22292 23159 22000 23463 22230 23296 21787 23150 22682 22834 22485 23000 22458 23414 22182 23174 22070 23496 22349 23091 22336 22840 22735 22839 22466 23017 22268 23396 22214 23281 21722 23020 22814 22713 22663 22914 22503 23172 22262 23260 22125 23460 22550 23069 22441 22817 22764 23081 22583 22954 22195 23337 22480 23049 22410 22708 22888 22743 22666 22965 22581 23208 22328 23092 22395 23067 22683 22801 22521 22628 22896 22724 22650 22854 22356 23552 22148 23044 21985 23637 22784 22537 22519 22153 23648 22254 22925 22528 22535 23447 22069 22785 21839 23671 22164 23029 21805 22564 23496 22151 22958 22213 23335 22852 22743 22667 21899 23692 22365 22816 22720 22618 23155 22356 22976 22281 23264 22416 23002 22656 22936 23004 22658 22753 22726 22826 23149 22440 22950 22188 23407 22281 23186 22279 23045 22729 23021 22395 22784 22920 22736 22590 22777 22752 22928 22596 22951 22295 23377 22201 23143 22660 23030 22722 22872 22519 22811 22720 22968 22471 11095 18419 20473 20011 20698 20349 21216 20347 21280 43478 27558 23878 24321 23095 23552 23332 23409 22891 23316 23157 23613 22636 23363 22391 23651 22500 23504 18251 21629 20768 21977 21144 22355 21217 22412 21408 40908 24432 24248 23251 23585 23374 23256 22986 23021 23232 23111 22999 23216 23073 23121 22823 22992 50 21362 21280 21999 21424 22669 21620 22404 21449 22878 26009 24476 23025 23238 23673 22824 23104 22314 23937 22319 23131 22663 23464 22912 23088 22236 22834 17888 21377 22103 21298 23285 21515 22845 22007 23016 22049 24621 23204 22741 23965 22449 23156 22400 23482 22568 23288 22590 23126 23025 22913 22850 22649 23256 21255 22359 22300 22679 22559 22432 22722 22264 23236 22100 23628 22429 23691 22467 23237 22448 23388 22802 23073 22570 22838 22937 23008 22765 23093 22393 23541 22361 23193 22148 23552 22227 23267 22215 23528 22261 23302 22249 23329 22597 23126 22432 22903 22941 22889 22517 22916 22837 23081 22564 23122 22136 23594 22180 23308 22409 23282 22528 22960 22636 22832 22798 22953 22575 23128 22413 23448 22181 23226 22194 23488 22439 23109 22465 22816 22866 22840 22730 22915 22514 23375 22372 23006 22367 23251 22644 22874 22567 22677 22820 23112 22534 23008 22009 23603 22505 22542 22731 22256 23271 22973 22477 22818 21824 23688 22482 23009 22519 22131 23453 22577 22578 23161 22199 22887 23488 22170 23125 22969 22262 23786 22260 22806 22886 22273 23140 22817 22768 22784 22880 22439 23473 22468 22985 22576 22528 22949 23024 22609 22936 22205 23392 22712 22816 22583 22834 22422 23518 22276 23221 22427 22771 22889 22921 22444 23084 22182 23416 22565 22951 22502 23060 22518 23484 22096 23304 22235 22825 22860 23080 22345 23227 22376 22765 22823 23220 22285 23296 22468 23080 22749 22909 22474 23098 22322 23227 22864 22757 22349 23092 22276 23211 22885 22901 22512 23222 22178 23177 22903 22817 22442 23094 22261 23026 22950 22788 22656 22856 22192 23368 22607 22828 22700 22916 22196 23355 22760 22807 22784 22884 22129 23768 22456 22816 22730 22195 22775 23684 21893 22738 22896 22531 22529 23834 22430 22565 22763 22341 22442 23816 22391 22432 23025 22777 22010 23591 23325 22391 23105 22485 22570 22778 23297 22345 23100 22580 22571 22777 23261 22480 22965 22641 23157 22392 23392 22448 22741 22664 22860 22252 23021 22949 23040 22330 23285 22319 22720 22777 23297 22236 23176 22432 22954 22145 23386 22710 22792 22536 23142 22260 23143 22785 23076 22324 23158 22464 22771 22576 23425 22336 23252 22349 22845 22414 23589 22251 23072 22431 22956 22094 23461 22672 22816 22560 22983 22116 23105 22770 23015 22248 23245 22372 22700 22701 23391 22385 22856 22642 22871 22261 23352 22560 22830 22679 22964 22211 23236 22770 22701 22640 22883 22277 22739 22921 22965 22150 23127 22540 22220 23274 23431 21898 23256 22443 22140 23600 22912 22259 23126 22295 22804 23452 22115 23048 22755 22256 23736 22233 22901 22544 22123 23360 23142 22196 22947 22999 22471 23429 22304 23122 21985 22762 23040 22617 22715 22840 22260 23060 22743 22881 22633 22816 22625 23254 22316 23173 22306 22817 55 16758 19780 20496 20355 21289 20274 21290 20694 21426 34845 25123 23841 23816 23094 23996 18823 21480 20877 22370 21241 22312 21465 21849 21968 42344 24421 24215 22924 24192 22768 19673 20367 22320 21835 22296 21960 22348 22085 22760 21952 24990 23252 24156 22727 23751 15693 22100 22180 22640 22062 22509 22616 22615 22313 22573 24844 23578 23177 23439 23184 23264 22115 22878 22608 22893 22568 22712 22503 23072 22392 25014 22744 23808 22593 23383 22213 23975 22403 23395 22551 22616 23383 22464 22746 22256 23744 22249 23026 22204 23548 22528 23141 22706 22576 23367 22608 22801 22326 23690 22247 22860 22244 23683 22346 22625 22626 23064 22833 22655 22711 23092 22757 22656 22679 23132 22848 22689 22768 22961 23044 22563 22880 22881 23022 22405 23006 22704 23157 22829 23105 22584 23262 22190 23260 22680 23174 22347 23181 22674 23257 22483 23499 22295 23278 22215 23586 22249 23379 22389 23271 22457 23201 22705 23254 22508 23313 22410 23385 22325 23232 22118 23655 22215 23095 22137 23467 22326 22977 22608 23087 22613 23028 22700 22865 22356 22856 22839 23008 22514 22938 22607 23147 22390 23348 
22129 21605 22050 21717 22279 21858 21773 21425 22200 21415 21895 21182 22116 21873 22360 21240 22103 21567 22048 21251 22273 21786 22327 21197 22472 21540 22084 21056 22088 21810 22299 21330 22061 21617 22311 21266 22199 21111 21255 20593 21907 22348 22424 21608 21199 21466 21536 21799 21795 21453 21289 22074 21841 21878 21335 21512 21767 21747 21452 21645 21218 21929 21930 22164 21319 21739 21566 21814 21528 21612 21469 22273 21838 21713 21280 21754 21632 21984 21505 21564 21549 22347 21559 21770 21430 22103 21357 21632 21081 22051 21746 22406 21323 21820 21511 22187 21485 21730 21365 22415 21724 21963 21280 22296 21345 21893 21198 22357 21669 21850 21388 22212 21451 21920 21089 22361 21678 21963 21426 22229 21136 21874 21666 22485 21536 21998 21637 22084 21345 21862 21816 22291 21181 22269 21496 22258 20925 22259 21782 22168 21319 22262 21302 21813 21696 22605 21366 22044 21623 22039 21165 22321 21847 21925 21572 22248 21611 21851 21936 22205 21232 22128 21447 21978 21512 22507 21446 21847 21604 21837 21167 22419 21808 21837 21671 22090 21143 22109 22464 22060 21123 22351 21397 21128 69 42 63 2214 4566 7896 8983 8953 10435 10191 43394 33883 28224 24847 23918 23613 22078 23150 23056 22200 21840 22440 21415 21934 22807 21807 21677 22265 21333 21603 22752 21681 21700 21867 22029 21746 22245 21795 21676 22059 21975 21397 22191 21822 21733 21869 21550 21515 22280 21623 21811 21652 21895 21347 22349 21504 21882 21671 22092 21401 22310 21596 21751 21846 21814 21479 22331 21459 21976 21678 21955 21111 22356 21703 21957 21577 21776 21394 22421 21298 22237 21361 21724 21570 22483 21184 22225 21717 21865 21825 22215 21286 22215 21229 21875 21774 22235 21334 22265 21684 21935 21795 22112 21216 22349 21453 21908 21677 22162 21340 22196 21432 22123 21877 22016 21304 22237 21304 21993 21807 22169 21329 22234 21399 22125 21278 22580 21451 21898 21463 22208 21698 21921 21651 22543 21523 21968 21367 22261 21365 21824 21112 22084 21940 22395 21513 21771 21312 22165 21675 22089 21369 22144 21306 21768 21351 22032 21411 22069 21333 21892 21210 21677 21328 22030 21634 21933 21126 22029 22475 22430 21296 21294 21441 22183 21918 21645 21003 22119 22460 22743 21754 21408 20871 21691 21491 22264 21766 21213 21884 22675 56 0 7859 11043 12213 14534 13213 14903 14479 16243 43382 33015 25786 25308 23194 22973 22577 22402 22320 22019 22489 21623 22140 21641 22268 21767 21765 22151 21856 21691 22301 21747 21741 22040 22084 21652 22425 21257 22210 21571 22097 21485 21957 21895 21693 21687 22161 21617 21898 21431 22373 21443 22017 21591 22261 21418 22172 21465 22184 21709 22018 21559 21849 21787 22103 21286 22233 21252 22304 21703 21761 21324 22338 21121 22600 21500 21828 21377 22210 21365 22000 21709 22406 21229 21978 21376 22223 21219 21959 21435 22531 21767 22267 21196 21776 21390 22041 21491 22230 21586 22092 21321 21920 21261 22131 21453 22428 21793 22560 21742 22688 21783 22548 21846 22528 21812 22485 21802 22505 21810 22412 21894 22375 21808 22391 21773 22253 21722 22458 21797 22305 21613 22162 21580 22084 21360 21712 21291 21952 21376 21963 21527 22103 21716 22125 21761 22229 21657 21961 21481 21679 20899 21194 21127 22253 22421 22912 22177 21920 21072 21178 20933 21730 21925 22153 21453 21600 20976 21344 21686 22656 22552 22039 21715 21222 21015 22011 22001 21909 21440 21406 21075 21873 22232 22042 21935 21425 21803 21677 22263 21762 21811 130 12488 15329 16848 17176 17296 17449 18083 17979 18259 31206 25111 23252 23284 22592 22660 21751 22193 22026 22145 22165 21845 21674 22383 22089 22168 21274 22057 21715 22168 21553 21751 21591 22429 21760 21997 21329 22176 21512 22461 21111 22120 21768 22380 21189 22199 21536 22279 21470 21848 21645 22513 21357 22010 21626 22084 21379 21764 21768 22444 21430 22048 21639 22126 21175 21816 21504 22605 21431 21970 21667 22154 21277 21874 21735 22327 21271 22185 21620 22477 21113 22220 21660 22168 21407 22276 21311 21920 21657 22576 21289 22244 21479 22102 21128 22413 21619 21825 21648 22035 21173 22487 21729 21789 21703 22016 21152 22280 21772 21801 21447 22103 21527 22149 21927 21803 21605 22069 21139 22350 21685 21942 21781 21729 21451 22716 20972 22248 21448 21344 22572 21863 21476 22085 21024 22103 22438 21283 21879 22170 21423 21558 22616 21551 21573 21972 20838 22231 22272 21191 21952 21533 21205 22838 20966 22272 21502 21073 22295 21779 21699 21698 21563 22033 21947 21616 22025 21357 22272 21683 21977 21730 21594 21880 22030 21603 21912 21431 22097 21852 21813 21612 21677 21904 21992 21381 22202 21285 21946 22033 21728 59 16256 17844 19569 18765 19895 19275 19811 19985 19836 31424 24376 22504 22979 21713 22448 21559 22242 21851 22042 21714 22318 21522 22644 21304 22434 21791 21931 21776 22042 21604 22227 21270 22544 21262 22185 21123 22164 21803 22017 21514 21908 21715 22058 21358 22272 20960 22596 21273 22261 20992 21931 21787 21909 21557 22091 21502 22336 21385 22055 21088 22413 21671 21928 21421 22033 21800 22256 21454 22197 21054 22496 21283 22245 21325 22032 21800 21850 21595 22045 21517 22459 21329 22203 21257 22412 21300 22272 21292 22063 21841 21800 21526 21903 21573 22402 21285 22101 21114 22378 21461 22235 21523 21646 22176 21752 21793 21977 21330 22715 20906 22254 21235 22391 21776 21790 21511 21405 22445 21336 21813 21197 22425 22285 21125 21857 20943 22838 21212 22184 21341 21959 22252 21507 21649 21233 22557 21360 22029 21664 21910 22312 21356 21707 21265 22152 21711 21915 21687 21587 22199 21603 21895 21434 22302 21546 22000 21406 22287 21578 22085 21668 22039 21691 21763 21752 21682 21987 22027 21591 22108 21270 22439 21315 21942 21454 22502 21531 22024 21470 21912 21863 21888 21671 21927 21592 22304 21452 22058 21088 22445 21313 17973 19755 21144 20580 21291 20629 20937 20870 21079 34153 23942 21943 22711 21477 22232 21289 22649 21424 22143 21559 21800 21925 22103 21709 22084 21544 22366 21521 22147 21272 22753 21164 22400 21121 22551 21308 22272 21419 22088 21853 21897 21451 21733 21780 21976 21554 22268 21511 22333 21469 22059 21119 22588 21205 22363 21335 22251 21705 22191 21473 21966 21944 21878 21528 21923 21876 22085 21608 22156 21171 22329 21461 22187 21429 21880 21847 21885 21587 21697 21921 21789 21661 22025 21851 22322 21248 22223 20803 22760 21152 22290 21270 22084 22229 21620 21747 21280 22460 21704 21814 21933 21015 22936 20931 22309 21126 22256 21845 21948 21600 21180 22574 21284 22191 21513 21880 22329 21521 22144 20947 22859 21283 22106 21940 21741 22240 21483 22043 21255 22300 21533 21745 21600 21649 22096 21596 21898 21660 21935 22108 21563 21926 21314 22194 21659 22008 21560 21677 22000 21796 21893 21829 21442 22299 21399 22178 21535 22261 21629 22008 21524 21799 21808 21961 21603 22119 21414 22471 21252 22190 21216 22515 21356 22232 21398 22055 21818 21998 21561 22093 21329 22476 21312 22146 21191 22421 21399 22258 21536 22012 21782 22003 21388 21940 21755 22080 21453 22113 21564 22323 21482 22285 21298 22491 21416 22223 21358 22163 21829 21977 21463 22065 21650 22343 21291 22294 20987 22689 21414 22211 21445 22056 21792 21939 21553 21896 21865 22019 21668 22011 21182 22553 21272 22284 21632 22056 21731 22011 21398 21736 21913 21912 21721 22549 21412 22372 21248 22124 20877 22733 21292 22105 21134 21711 22465 21376 21809 21145 22362 22119 21115 22209 21008 22512 21799 21857 21483 21385 22723 21294 21945 21625 21722 22295 21335 21944 21224 21952 22328 21370 21991 21386 21973 21824 21841 21633 21653 21941 21939 21652 21909 21483 22273 21572 22000 21633 21801 22076 21760 21877 21781 21493 22392 21351 22126 21424 22071 21895 21888 21763 21709 22009 21895 21491 22085 21114 22487 21421 22161 21584 22064 21820 21885 21571 21885 21893 22130 21500 22114 21313 22541 21226 22421 21285 22239 21705 22018 21503 21798 21901 21933 21673 22033 21317 22535 21209 22327 21192 22432 21447 22291 21401 21936 21895 21821 21664 22069 21605 22244 21265 22124 21070 22611 21386 22389 21327 22134 21722 22048 21402 21911 21829 22365 21329 22172 21268 22439 21349 22293 21733 22023 21782 21953 21589 21756 21915 21893 21632 22063 21624 22179 21526 21960 21241 22533 21346 22174 21248 22211 21736 21958 21849 21444 22220 21892 21596 21742 21412 22619 20956 55 77 6848 7117 9910 9457 12037 11222 12143 43351 43083 30009 24872 24205 23088 23032 22912 21778 22151 21178 22964 21533 22321 21593 21733 22210 59 54 9351 13456 14235 15191 15459 16263 15976 16480 43370 32704 25872 24505 23095 23248 22339 22661 22378 22296 22063 22240 21744 21837 22068 21934 21778 16 10721 15495 16743 17797 17939 18585 18310 18500 18535 38672 26599 24533 22437 23364 21874 22753 21853 22647 21851 22392 21523 21947 21957 22102 21573 21921 7426 16876 18465 19029 19282 20452 19416 20429 19400 20877 27501 24453 22440 23124 21792 22646 21702 22194 21980 22027 21612 22052 21807 22250 21572 22230 21653 17594 19505 20741 20288 21641 20391 21342 20426 21495 34128 24212 22135 22423 22069 22132 21632 21881 22039 22088 21778 22042 21424 22555 21440 22145 21239 22439 21623 22147 21583 21810 22189 21833 21444 21592 22370 21452 21738 21187 22542 21344 22141 21591 22012 22317 21549 21760 21157 22850 20979 22304 21506 22010 22261 21432 21815 21153 22646 21440 22102 21312 22067 21946 21774 21714 21687 22133 21986 21696 21897 21578 22426 21416 22004 21512 22133 21689 21918 21526 21683 21836 21845 21651 21911 21257 22471 21319 22169 21460 21709 21911 21799 21682 21802 21370 22467 21330 22222 21336 21979 21808 21970 21513 22519 21242 22530 21178 22324 21409 21990 21874 22005 21508 22183 21036 22472 21484 22072 21382 21972 21587 22539 21227 22151 21702 21775 21792 22273 21154 22199 21207 22275 21737 21972 21603 22515 21317 22456 21255 22170 21373 21821 21950 21976 21492 22073 21333 22213 21751 21888 21632 22040 21693 22375 21394 22149 21487 21562 22333 21892 21578 22001 20801 22500 21981 21227 21856 21749 21230 22856 21335 21383 21965 21661 21256 22807 21495 21661 21862 21217 21829 22573 20961 22152 21629 21159 22205 21907 21831 21685 21879 21489 22000 22007 21626 21857 21856 21496 22112 21915 21765 21652 21933 21296 22118 21953 21702 21620 21543 21273 22588 21515 21859 21570 22012 21273 22438 21463 22085 21479 21888 21551 22468 21229 22327 21322 21889 21656 22339 21184 22242 21404 21885 21530 22535 21126 22279 21340 21957 21367 22695 21266 22092 21546 22060 21261 22541 21431 21923 21629 21991 21014 22606 21565 21930 21507 22159 21094 22456 21775 21833 21572 22101 21221 22005 21842 22152 21264 22263 21448 21824 21478 22418 21450 22022 21689 22061 21061 22412 21977 21748 21733 22039 21548 21356 22253 22392 20885 22081 21568 21298 21396 22881 21243 21703 21934 21767 20859 22624 22063 21259 21910 21693 20954 22126 22451 21338 21722 22182 21377 21415 22352 21739 21792 21754 21839 21516 21974 22061 21787 21627 22019 21689 21598 21940 22266 21443 21895 21554 22082 21353 22295 21533 21904 21612 22429 21317 22256 21640 21966 21652 21981 21405 21947 21879 22066 21281 22242 21329 21861 21723 22242 21256 22248 21142 21965 21798 21992 21384 22104 21138 22384 21591 22051 21414 21911 21305 22567 21161 22324 21841 21802 21785 21976 21358 22146 21319 22332 21656 22088 21419 22016 21655 22507 21170 22303 21179 21858 21850 21976 21632 21937 21112 22343 21467 21955 21529 21728 61 52 4437 8745 9354 11611 11506 12471 12400 12895 43370 33740 26304 24763 22398 23614 45 11445 13659 14951 16743 15819 16744 16823 16333 43369 31737 26905 23743 23241 23600 1727 14304 16246 18722 18732 18151 18781 18048 20044 43357 30887 25397 23629 23569 22384 6050 16515 19240 19299 19977 20036 20243 20365 20316 20096 28847 24480 23120 22457 22341 8935 19148 20296 20683 21184 21002 20822 21025 21170 21070 27031 23584 22566 22575 22120 22467 21820 22706 21670 22428 21358 22717 21381 22528 21508 22376 21657 22371 21600 22024 21826 22237 21557 22000 21873 22161 21525 21981 21758 22110 21678 21973 21782 22049 21755 22248 21747 21975 21565 22087 21627 22203 21559 22054 21724 22046 21562 21877 21841 21905 21608 22087 21896 21888 21697 21795 21973 21882 21543 21657 21943 21927 21543 21703 21927 21873 21669 21554 22306 21446 21696 21452 22412 21552 21481 21632 22490 21353 21740 21211 22567 21248 21792 21127 22556 21323 21778 21161 22408 21537 21584 21713 21923 22106 21463 22488 21722 21775 21555 21947 21853 21565 21869 21824 22049 21681 21912 21680 22038 21366 22327 21393 21943 21403 
22199 21223 22003 21287 21777 21873 22147 21454 21557 21680 21994 21238 21431 21458 22400 21868 21280 21333 22291 21461 20965 21819 22837 21763 21060 21253 22152 21508 21199 21303 22689 22237 21123 21192 22105 21426 21494 20903 22131 22584 21984 20803 21539 22045 21773 21664 21355 21987 22043 21824 21395 21794 21831 21662 21514 21501 22182 22248 21669 21688 21709 21788 21467 21479 21737 22252 21863 21671 21546 21993 21568 21787 21313 22101 21648 21552 21265 21966 21464 22071 21184 21848 21949 22112 21248 21798 21697 21808 21521 21354 21130 22464 22293 21517 21050 21911 21912 21649 20821 21384 22336 22528 21050 21145 21927 21658 21037 21231 22329 22373 20918 21164 21817 21804 21224 21304 22423 22204 20863 21772 21781 21655 20992 22604 22521 21920 20879 22216 21770 21560 21614 22041 21894 21292 21904 21562 22096 21276 21967 22016 21492 21713 21872 21844 21424 22016 22168 21351 21840 21732 21495 21239 22011 21847 21517 21642 21803 21478 21684 21992 21799 21410 22012 21473 21504 21719 22276 21382 21856 21646 21796 21378 22243 21571 21657 21655 21741 21202 21918 21941 21700 21495 21939 21461 2963 12354 15541 16577 17213 16986 18391 17716 18168 43328 25738 22342 22821 21897 21677 21744 21940 21093 22220 21767 21601 21620 21810 21111 22085 21773 21616 21479 21687 21110 21978 21801 21637 21589 21917 21376 21660 21827 21889 21360 22007 21293 21744 21831 21719 21428 21904 21323 21966 21830 21640 21648 21872 21288 21904 21834 21560 21582 21804 21382 21898 21921 21685 21485 21820 21259 21767 21808 21689 21368 21973 21532 21715 21901 21617 21611 21752 21036 22112 21738 21421 21696 21587 20797 22592 21643 21174 21731 21248 21440 22702 20808 21920 21557 21233 21327 22643 21092 21583 21701 21355 21768 22785 21201 21565 21665 21278 21564 22615 20892 21888 21601 21053 21768 22656 20985 21775 21573 21276 21373 22060 21559 21621 21922 21586 21603 21632 22152 21766 21461 21703 21767 21400 21401 22023 22082 21959 21556 21531 21861 21575 21191 21170 21696 21820 22204 21721 21803 21292 21772 21773 21917 21603 21779 21317 21657 21521 21723 21345 21653 21360 22087 21496 21891 21646 21647 21270 22066 21941 21926 21120 21884 21403 22055 21543 21626 21283 22331 21798 22069 21293 21501 21307 21776 21591 22003 21353 21654 21656 22272 21175 449 17767 19219 18983 20309 19189 20025 19778 20336 19869 28064 22676 22752 21509 22203 21370 22299 21190 22125 21344 22169 21778 21725 21761 21635 21646 22282 21117 22036 21593 21644 21711 22134 21063 21930 21467 21780 21421 21650 21917 21675 21632 21980 21334 21895 21227 22121 21408 21940 21484 21935 21486 22024 21477 22055 21327 22038 21568 22099 21168 22070 21073 22348 21687 21353 21810 21226 21709 22552 20716 21499 21876 20952 22529 21581 21026 21792 21835 21056 21386 22723 21875 21047 21745 21943 21929 21024 21351 22586 22660 22083 20956 21123 21415 21608 21870 22153 21721 21541 21512 21360 21729 21828 22206 22040 22074 22033 21981 21837 21904 21783 21784 21688 21831 21808 21800 21696 21937 21793 21941 21760 21931 21803 22020 21879 22181 21991 22069 21899 22074 21830 22117 21949 22272 21932 22304 21715 22007 21492 21762 21360 21628 21225 21686 21250 21760 21484 21988 21674 21989 21421 21847 21809 21748 21114 21756 21584 22244 21955 22134 21600 21906 21179 21741 21461 22126 21434 21841 21385 21536 21368 22195 21902 22370 21769 21840 21189 21824 21681 21981 21459 22049 21143 21767 21847 22320 21745 21838 21223 21877 21544 22125 18144 20109 19789 20860 20814 21204 20423 20896 20859 36561 23062 22344 21594 21818 21729 22320 21802 21600 21389 22037 21648 21830 21280 21641 21730 22274 21680 21633 21415 22034 21497 21843 21173 21737 22034 22406 21655 21323 21625 22025 21481 21169 21352 22745 22112 20977 21366 22252 21684 21585 20899 22324 22551 21584 20878 22112 21694 21532 20826 22295 22544 21429 21035 22176 21770 21651 20839 22089 22634 21570 20871 22184 21690 21541 21168 22416 21898 21377 21904 21589 21980 21290 21933 21969 21550 21657 21824 21717 21493 21927 21959 21408 22016 21585 21530 21479 22164 21584 21698 21731 21941 21367 22250 21611 21612 21867 21725 21228 22131 21620 21570 21622 21761 21108 22153 21712 21650 21730 21867 21355 22252 21239 22048 21468 21518 21856 21974 21447 21989 21478 21862 21867 21729 21589 21928 21184 22190 21738 21659 21671 21860 21260 22086 21790 21588 21692 21936 21157 22351 21341 21927 21492 21728 21745 22039 21431 22112 21522 21680 21973 21687 21688 22165 21505 22340 21169 22101 21357 21936 21788 21642 21619 21933 21013 22400 21254 21988 21472 21664 21879 21641 21703 21873 21319 22309 21497 21879 21594 21585 21852 22028 15424 20712 20551 21643 21105 21608 21208 21381 21424 21536 23596 22345 21351 22353 21456 21978 21569 21281 22436 21976 21289 21985 20902 22203 21898 21258 21907 21304 21811 22276 21096 22071 21213 22163 22001 21290 21798 21126 22521 21336 21838 21755 21368 22773 20939 22172 21277 21888 22295 21088 21791 21303 22126 21848 21511 21661 21008 22166 21495 21828 21718 21248 22194 21394 21901 21593 21560 22058 21469 21860 21469 21741 22078 21504 21745 21443 22104 21773 21582 21669 21474 22006 21713 21703 21346 21543 22195 21360 21773 21177 22221 21416 22005 21568 21560 21974 21715 21719 21803 21469 22208 21340 21994 21321 22009 21751 21687 21509 21560 21946 21952 21504 21817 21360 22274 21190 22073 21105 22231 21340 22063 21923 21888 21929 21671 21642 22055 21545 22193 21384 21851 21188 22287 21177 22056 21477 21947 21719 21965 21490 21708 21868 21632 21612 21859 21850 21848 21612 21917 21125 22428 21166 22061 21281 22240 21426 22061 20790 22059 21651 21870 21331 21584 21913 21669 21702 21820 21391 22283 21228 22081 21529 22085 21639 21932 21531 21856 21912 21655 21515 21511 21639 22021 21604 21833 21219 22330 21241 22025 21389 21792 21923 20772 21310 20960 22342 21004 21816 21504 21488 22031 24709 22275 20959 22722 20998 22046 21401 21517 22400 21191 21994 21667 21687 22388 20971 21815 20852 22861 20856 22144 20964 22353 21937 21613 21447 21351 22570 20932 22010 21393 22183 21465 22034 21716 21793 21882 21608 21632 21433 22060 21473 21840 21597 21896 21761 21831 21660 21314 22327 21339 21860 21357 22150 21587 22000 21575 21605 22017 21405 21781 22136 21616 22198 21267 21950 21305 22221 21309 22080 21549 22032 21670 21837 21527 21676 21956 21680 21636 21914 21579 22185 21372 21850 21232 22344 21329 22136 21408 21832 21812 21692 21556 21798 21748 21935 21633 21817 21261 22325 21266 22136 21303 22189 21447 21979 21365 21619 21895 21655 21671 21977 21579 22035 21453 21763 21227 22329 21330 22147 21464 22030 21782 21735 21474 21757 21692 22048 21568 21791 21285 22309 21351 22054 21378 21839 21883 21649 21753 21654 21615 22228 21345 21987 21184 22240 21543 21961 21560 21592 21935 21565 21654 21632 21384 22240 21223 21948 21066 22363 21433 21889 21436 21527 22455 21112 21788 21077 21784 22313 21144 21863 20896 22807 21056 22230 21515 21866 22167 21272 21655 21174 22320 21457 21929 21436 21688 22228 21318 21765 21042 22737 20774 21952 21445 21385 22176 21485 21887 21454 22121 21626 21780 21575 21569 22137 21513 21827 21337 21614 22196 21372 21879 21314 22137 21477 22007 21964 21771 21948 21630 21659 21540 21750 22119 21506 21828 21273 22253 21299 22125 21287 21934 21830 21665 21506 21480 22003 21607 21741 21873 21461 22197 21302 21914 21260 22300 21372 22112 21405 21847 21920 21645 21682 21872 21397 22262 21255 22062 21331 22192 21632 21957 21452 21600 21962 21686 21693 21908 21222 22325 21319 22071 21401 21673 21967 21613 21745 21626 21625 22344 21176 22135 21333 22156 21721 21757 21459 21748 21795 21881 21620 21954 21221 22183 21615 21786 21448 21476 21912 21640 21676 22257 21571 22227 21338 21975 21666 22065 21895 21734 21597 21517 21933 21710 21682 21700 21112 22674 20961 22193 20974 21977 21992 21514 21632 21034 22573 21380 21921 21196 21460 22455 21011 22030 21031 22711 21261 21925 21425 21440 22535 20992 22048 21271 22185 21718 21368 21819 21068 22390 21516 21784 21955 21608 22162 21378 21824 21383 22173 21469 21997 21535 21592 22045 21544 21848 21634 21696 22091 21536 22016 21344 22256 21382 21998 21413 21931 21672 21935 21640 21433 22087 21513 21784 21739 21912 21814 21664 21750 21307 22275 21337 21973 21988 21825 21881 21725 21467 21635 21856 21851 13776 18168 18450 18815 18755 19317 18996 19624 18826 38464 23431 22924 21870 22073 21504 21725 21836 21731 21557 21625 21527 22099 21340 21831 21178 22185 23 19521 19077 20563 19600 20492 19853 20909 19836 20763 27896 23490 22092 22134 21491 21632 21786 21665 21493 21552 21920 21587 21664 21636 21819 21761 21655 14283 19484 20877 20535 21072 20430 21513 20489 21165 20267 25362 21829 22308 21901 21598 22282 21253 21655 21142 22622 21041 21933 21235 22209 21483 21713 21712 18656 21132 20381 21480 20381 22342 20416 21766 20745 42507 23008 21943 21703 21376 22608 20984 21903 21312 22311 21505 21841 21537 21706 21928 21573 21664 21435 21001 21010 21377 21284 21717 21601 21540 21516 21239 25831 21782 21989 21286 22274 21339 22024 21633 21819 21744 21837 21572 21537 21962 21777 21610 21799 21264 22120 21440 21881 21113 22208 21216 22043 21184 22249 21223 22041 21544 22077 21592 21863 21445 21547 21875 21665 21638 21714 21733 21806 21389 21932 21063 22387 21281 22049 21224 22004 21784 21644 21447 21581 21816 21890 21514 21779 21302 22400 21127 21930 21184 22123 21538 21826 21479 21527 21873 21590 21708 21809 21322 22256 21303 21933 21589 22069 21731 21632 21650 21784 21624 22088 21315 21952 20973 22232 22282 21112 21976 21234 21821 22132 21069 21996 20905 22389 21621 21585 21684 21043 22262 22077 20804 22161 21819 21345 22553 21093 21792 21641 20876 22421 21975 21476 21764 21420 21734 21912 21637 21696 21666 21352 22040 21849 21732 21689 21408 21882 21894 21440 21801 21460 21829 21974 21518 21771 21777 21259 22137 21440 21836 21546 21536 21922 22131 21277 21939 21455 21891 21878 21574 21612 21504 21285 22312 21220 21911 21543 21591 21746 22231 21303 21865 21462 21584 21697 22253 21161 22057 21408 21549 21829 22017 21297 22081 21264 21588 21767 22182 21166 22084 21365 21611 21813 21943 21223 22070 21436 21492 21956 22176 21290 22026 21479 21457 21906 21879 21425 21897 21395 22032 21909 21715 21507 21881 21419 21827 21985 21458 21664 21796 20770 22396 21966 21012 22077 21638 20985 22834 22089 21008 21975 21675 20839 22129 22253 20948 21961 21605 20867 22183 22584 21021 21747 21773 21161 21652 22130 21453 21834 21682 21558 21380 22188 21635 21670 21788 22027 21390 22119 21824 21468 21690 21804 21304 21929 22023 21888 21426 22011 21459 21445 21714 22209 21345 21873 21574 21847 21386 22277 21639 21639 21638 21928 21448 21672 21959 22060 21153 22092 21399 21616 21683 22304 21184 21858 21597 21862 21334 22293 21470 21857 21569 21902 21088 22273 21808 21668 21545 21945 21399 21934 21944 21921 21381 22107 21355 21709 21640 22384 21261 21824 21584 21671 21204 22082 21847 21595 21547 21892 21273 21933 21893 21687 21540 21893 21548 21765 21940 21820 21400 22114 21556 21542 21588 22640 21311 21749 21700 21526 21325 22690 21037 21708 21600 21198 21925 22485 20736 22167 21430 21279 22678 21261 21812 21665 20829 22580 21671 21417 21875 21481 21573 22500 21552 21785 21776 21288 22265 21447 21889 21564 21435 22016 21911 21532 21830 21482 21897 21920 21540 21639 21587 21521 22294 21227 21992 21498 5836 17434 18484 18867 19136 18910 19789 19015 19719 19626 27437 22985 22085 21888 22265 32 19512 19261 20363 19689 20912 20096 20464 20359 20487 28930 23312 21984 22007 21319 22296 18134 20587 20679 20804 21115 20837 20890 21037 20917 32407 23055 22392 21351 22534 21219 18549 20269 21144 21192 21221 20992 21216 21446 21164 21193 23139 22368 21882 21740 21881 18138 21000 21238 21371 21584 21593 21574 22037 21472 21784 22698 21983 21301 22436 21277 21944 20842 22759 21008 22050 21416 21707 22017 21282 21608 20978 22566 21000 21888 21065 22514 21182 21693 21387 21749 21958 21504 21645 21316 22355 21153 21655 21139 22222 21640 21564 21664 21744 21582 21640 21495 22061 21649 21656 21549 21830 21730 21523 21761 21664 21958 21430 21714 21602 21920 21828 22011 21473 21877 21452 22129 21380 21972 21704 21922 21466 21937 21888 21997 21394 22101 21235 22219 21235 22011 21109 22166 21320 21997 21424 22053 21461 21964 21386 22180 21265 22008 21352 22306 21158 22024 21093 22353 21280 21868 21305 22029 21655 21703 21788 21707 21532 21564 21853 21781 21504 21576 21809 21868 21421 22071 21404 22016 21221 
40885 40496 38768 40931 36019 37018 39978 42761 33797 34623 38373 40512 42531 42720 42663 37395 40448 41415 41671 42854 37708 36608 37024 35795 38215 40324 40118 32921 39925 41143 35480 41132 39190 39818 39744 42240 43232 37056 39896 34259 38111 35620 33175 38822 36112 34528 41472 38588 39044 36440 41780 36260 36673 34802 32778 42913 40682 41325 35032 34901 35316 36016 42665 43187 35958 41222 37312 34969 33244 38320 33508 36009 40847 39737 37493 35520 41728 38949 42202 34077 32684 42961 33866 34220 33827 38407 42883 35321 35281 41128 42368 34681 35049 37277 32912 33883 34657 41755 35738 33869 41676 39450 33123 34116 36068 42756 42184 36183 35783 36118 40226 35715 36586 36297 40119 40965 43138 41016 36732 35861 35977 34636 37240 34407 43840 37728 36600 40647 36032 33399 34153 38708 37325 40800 37367 33608 39080 40692 38498 38400 42931 35526 36889 36643 41960 38528 40244 41728 36736 35499 43060 40788 38965 37015 33076 34235 36249 42727 35172 38296 36396 41849 38944 42736 32883 35328 41080 41856 36951 34596 35973 41424 41329 33900 34504 34598 35728 39768 37752 37911 35152 42944 38100 42632 29965 27219 31189 30843 37879 35744 40664 33568 38196 41445 37286 42029 37047 37337 35030 35472 37691 38800 40909 36102 33944 34072 36144 39058 39429 36137 34054 42696 35425 38936 38342 36332 34374 33779 37521 41392 34900 36458 37088 41377 38946 41024 35746 36656 35527 42034 37430 41243 38400 36660 34313 34208 36824 40644 37344 36664 33450 33725 36153 41593 37479 37548 35067 42856 36781 40465 36048 36130 35048 41472 38432 33233 35183 37376 34225 34153 35654 38052 39530 35818 42168 35185 33792 35491 33959 34435 39494 35719 40000 42252 35911 35522 37305 33576 40088 41496 35168 38616 34068 35080 41515 35919 36224 39841 33848 34532 40588 33777 34511 36458 36945 33997 38304 35773 34700 37603 36112 33672 40423 41998 39320 33772 34184 37376 33776 33922 33945 39810 35928 42530 35561 35863 41769 42151 38918 39300 38259 33483 33056 36816 33807 39876 39621 35056 36416 40676 35656 36328 40751 36044 35957 37618 34130 35840 41004 34868 32804 35410 41207 34816 41272 39625 43046 37480 34610 34587 40388 39205 37945 37687 38816 37376 42042 39324 33524 34247 40527 42199 36425 39154 41002 43393 41409 35952 33984 38448 41568 34840 34459 40850 39928 22968 33583 38971 36940 40902 39270 38060 35168 40972 36512 41664 35336 35904 32791 40564 41881 41864 40045 40107 41356 40451 35936 35577 35584 34303 34455 41192 39396 38784 34084 34333 35415 39893 38633 37776 42817 36136 42216 34695 37553 35025 34031 38203 41306 37554 40401 39954 41969 37960 42932 38212 43031 38785 42896 39350 41513 38984 33561 39349 39511 39316 38550 42216 35373 41448 36471 40201 35590 33556 34579 42998 37345 37216 33336 33702 37728 35991 36695 38108 41792 36021 37110 38347 35668 37928 37760 37794 41632 34454 34770 39197 37407 39024 42247 34340 37093 40064 35602 33216 32592 41163 35672 36423 40788 38896 39338 38737 38512 36854 37184 36112 35895 34906 36588 36135 36098 34892 37617 36068 37814 35553 37746 36392 38432 37369 40431 38688 39271 37506 39264 36679 39744 38190 41065 37929 41461 35596 38698 42951 35928 41344 34664 40129 35153 40052 35661 42776 38565 34938 38346 42324 37159 36196 35715 38980 36006 33588 40870 38179 40029 34032 37193 39826 35952 42514 40214 42480 36908 41715 33269 41368 40758 37619 42298 36106 36521 39768 36440 34845 38347 42624 39072 39468 36008 36864 41589 35911 36757 40291 37357 33253 39792 38105 39006 35584 36232 35767 39834 42326 36630 36371 41127 39619 42098 34237 36335 35429 41513 36472 33845 41676 38993 34453 36469 40416 34600 35348 41031 34983 34148 41992 38848 43128 37031 39657 35792 38569 42690 35016 41130 34596 38540 42913 39771 41515 36297 39504 37617 41657 41472 35155 33657 36479 41696 34080 33536 36291 39447 35365 33082 35680 41491 33685 42088 38400 40208 36011 34534 36023 39336 34935 33461 36194 40296 35257 33201 39184 42652 37570 41528 37394 33956 38176 40805 38027 38136 33577 34479 36211 35360 42852 38023 38208 41828 38542 33848 32997 42636 40357 33836 34892 35482 37776 41781 41440 34534 34104 37029 35635 40204 40069 34402 33416 34162 35521 38817 40134 35321 34368 35350 37083 41603 41476 40728 38880 42785 33360 36568 38240 42540 38681 42858 37226 37195 35489 33828 37472 39549 40706 35876 34712 34794 36798 40369 39488 36352 33771 34968 37521 39456 42450 41762 37963 42920 35632 35608 38864 42445 39749 33042 34564 38144 35192 34890 40034 32832 41704 39712 39688 41811 37807 36150 34392 34189 37738 37851 42396 40566 38469 42592 34800 37223 34458 35192 36979 41158 41864 43304 37584 34016 33621 36726 38678 30155 34277 32681 34322 38740 34135 39816 41776 42216 33313 34816 41970 41792 42314 42618 38517 33643 40368 43087 38473 40813 38465 36736 40737 37495 40359 37580 40881 36529 41159 38903 39402 40336 40301 38672 40812 36395 39034 44088 41572 36981 35984 41511 36696 37207 40308 40868 37137 41624 38720 36430 40960 40120 36915 32944 34630 37443 40231 43267 36748 35416 39944 40601 41890 37671 34021 33303 38873 42884 37143 42832 36086 39383 32691 35498 42256 39736 36144 33857 34661 42481 38870 35379 35235 41318 33617 40437 41541 36216 39680 41095 42209 38861 33555 33265 38064 35438 35460 36306 42725 40787 41528 38680 41216 38864 36064 35086 32765 33217 37743 37831 32599 36294 41319 41331 39996 39409 38971 41162 41581 39505 37670 37015 37714 34973 34333 38955 33432 40321 41731 37191 39695 41717 39936 39068 42873 38268 35624 38153 42880 35552 37037 34134 34085 36822 36824 36752 34225 37545 39068 43010 39936 39337 40675 41060 42321 39432 35660 39080 34677 37087 41232 33849 37390 34841 35097 36424 41922 41673 40513 39376 33261 39169 34624 37627 33289 36551 37405 34736 32907 32744 34278 38464 34083 36518 40136 42070 40696 38806 41985 36151 37610 35108 41016 37355 42048 37936 36416 32520 42418 39169 36150 41200 37776 35696 37570 39002 42016 33297 42188 40163 38617 34832 35016 42419 37826 36592 36096 37376 36184 39715 37466 42073 37976 34370 42369 41794 34262 36789 38682 41805 40728 42849 38899 35369 35972 37222 34081 33990 42136 39312 42752 36794 34129 37056 35669 36624 34695 40776 42167 41677 37109 41655 40222 34058 38247 33877 33963 38297 42123 36225 39797 34209 40488 40619 38240 41013 41159 41319 39297 33635 38358 34891 36688 33179 34710 37813 34820 34153 37362 33861 40344 41878 37085 40114 42121 41380 40100 41936 36727 36320 35080 33321 36048 35656 37943 34261 36369 40459 42051 40592 40078 41171 40793 42726 38628 41744 34525 37262 34727 34797 38176 33899 38626 42656 36022 40330 42081 41367 40170 42689 39032 36109 35701 42544 36323 35092 38656 33504 36169 40647 41842 41808 39204 41626 37096 37389 34478 35782 34562 34327 40738 41475 38596 39628 41008 33632 37922 33520 33677 37825 33777 34440 34050 41419 41120 40495 38121 38517 42451 42608 37332 42368 33445 43162 39201 36214 38581 36000 41696 39383 37232 36423 36697 38136 41010 33219 36842 40336 40578 34906 39565 41713 42706 37958 42401 35208 40800 41226 36001 38019 35942 35173 37667 42425 41959 40398 43157 37816 42626 40072 34573 35768 33752 33370 39846 33065 36370 41331 34534 40402 41896 37536 40944 40200 42960 39008 38136 36000 37928 34601 34664 33090 35632 39823 32823 36301 40544 41512 41088 40160 40989 38023 36649 34640 32568 42452 38835 34358 35703 36993 42560 40900 41082 37712 40416 41721 41997 39712 42215 37127 37409 34632 34744 36855 41819 41601 40635 39374 41335 40531 34337 37888 42535 34122 37952 35084 35136 37280 40192 42024 41435 39499 42055 35095 38265 34412 35570 34388 34257 41835 39808 40208 41425 40300 35653 35978 42497 35987 36119 37237 34240 37752 40245 40656 34649 35936 42275 42936 37666 34376 34778 41024 33845 40792 41495 38538 34726 38914 37464 35633 34077 32901 37664 35456 34792 34988 38832 35168 37213 40473 37803 38295 38464 32954 33948 37927 34194 41412 37690 40034 42600 43648 38069 38852 38231 35818 40480 37788 42152 42368 33894 37209 38736 40717 40616 35613 41496 36806 38471 42696 33258 35776 37920 34099 39939 41625 36545 41745 40640 42992 38912 33547 33688 38848 33337 36572 34224 34797 39436 33139 38169 41236 41300 41888 38835 42178 38039 34832 37863 34378 42147 39701 33063 35772 35720 37332 36448 34512 35724 40980 41431 41557 38423 38321 36482 37264 35634 42676 34587 36644 36818 33016 38192 30660 34979 34137 40182 36920 33472 34839 40707 43549 38238 37287 39242 32714 35408 36614 35572 33451 34276 33028 39360 41445 36914 39683 40596 18315 31335 37473 32904 32844 31747 35918 36808 36002 35133 39973 43985 39792 40080 43104 34403 35958 34597 42837 33557 37250 33888 34408 34149 36444 35634 34633 38323 31929 36240 32597 38135 42314 33193 31718 39400 40656 43180 36878 41536 37588 34135 41207 40475 34914 39127 34871 37991 37904 40420 40759 43167 35546 35072 32953 38968 41820 42979 42024 42275 42080 36021 34839 43091 39083 38040 35387 41273 34502 37465 37591 40784 41989 32976 36464 33108 35056 37520 33705 34396 42248 37896 37719 41536 40818 35585 33936 33001 32742 40284 38553 36066 38400 40772 41288 41643 38737 34311 36451 35568 36714 33563 32971 37880 35919 34118 36197 40174 39860 42262 37510 39104 40599 40099 39107 39643 41344 40520 39003 33335 39208 33997 36957 42396 33717 37037 34664 34282 35127 35520 36365 41798 37970 38546 42649 40840 39008 40250 38646 36052 34426 42370 34191 36233 37082 32902 35776 40824 42546 39411 37810 39584 40035 33317 36257 42844 33480 36908 33908 35148 36187 41048 41299 41222 38052 33964 39033 35696 34051 34304 35808 34226 39188 41111 37960 37719 40935 41530 39127 38298 40325 36755 39865 38706 38602 36831 42579 34656 33632 34775 38096 41388 39628 35608 39984 36663 41252 34000 38666 36004 34408 36204 42767 38633 42729 35945 42100 35840 37362 34425 34803 34560 41280 38912 36956 35495 35025 41686 37448 37296 42116 36502 42437 36818 38232 33127 35776 35810 40390 40178 42304 36904 33360 32853 37280 39953 40843 38016 42752 37441 37249 33712 34060 32529 40457 41774 40320 37696 33463 33861 35513 41030 41228 37220 42608 33944 34896 41285 39696 39159 41905 33739 36437 38436 40807 39382 40403 33959 35762 40362 39796 39371 41776 34524 36308 37958 40345 39346 42469 43146 38200 40227 40907 38808 43008 42745 37568 37362 42100 37540 41838 38727 37557 35415 32717 37072 42202 36760 38288 42501 34805 36004 35019 42560 38504 37768 39448 34504 37584 36888 39432 37658 38369 35048 36049 39744 41527 37324 38098 34192 36089 40448 34288 37920 35827 35963 39459 34582 39705 42742 36883 34880 33440 41332 40698 34544 34693 35995 38660 41936 40088 36484 42647 35340 36240 40794 37863 38738 37091 42084 39024 42663 42696 35520 40565 41480 37253 33718 36737 41671 41482 34742 34393 34232 37480 42352 34986 38038 39156 39384 39555 42112 34341 34848 41318 39737 36951 34139 36870 41228 41671 43072 37104 33559 37292 38528 41184 36371 34673 33212 37760 41993 38056 37873 37559 41676 39950 41771 35638 34256 42218 40767 36488 33646 34785 39793 39313 37029 34098 33312 36968 40556 37996 37309 35172 33079 37078 33385 35603 37688 36555 41755 39819 33562 33125 33590 34542 41111 36004 35063 32980 41040 35479 38192 35328 33804 39846 37760 43610 34843 40216 42418 41063 35432 40450 36442 34648 35942 33948 34816 41952 37403 42838 33958 43473 33590 35896 35704 40564 41586 42752 37357 33650 42222 38538 37665 33201 36416 42800 37553 37447 33192 34315 33782 32739 41266 40561 38530 43107 30369 29868 30754 35241 38144 36186 35460 37136 34604 33506 44816 39056 39472 37099 41355 18132 31264 39477 41620 34614 36489 38455 42422 41719 32218 39931 42016 38374 38820 41267 41472 38420 33377 34105 35328 39083 36103 36480 38231 36908 47488 40000 42728 41846 33729 40016 32186 40349 39314 39867 40320 37508 39953 42544 39782 40018 40482 42325 37504 35748 37188 38096 37622 40420 42002 33892 33845 33536 38537 42562 36215 35448 38480 40962 43112 40998 37993 36122 36304 37544 38839 42088 35577 38400 40576 34273 37360 33954 37413 37018 38448 43855 40176 35379 41747 36028 38006 32610 34392 40784 42400 39524 34859 39091 41088 34520 33504 34368 35460 33831 34176 42906 39472 34571 34437 33361 36435 35427 32952 35440 34487 37889 42290 35495 33920 37248 36424 38759 42730 37457 42514 40057 41713 38326 35187 37400 42672 37958 36965 38612 41801 39771 40512 41090 40560 38967 39090 40288 41184 38815 42080 39196 42740 38357 41782 40500 40548 38730 41479 41728 39666 38648 38864 42180 40667 37269 40944 38992 34816 35240 36013 35337 33090 33413 36849 35975 32536 33408 36119 37031 42253 39532 42100 38550 40276 
22766 23749 22848 23509 22936 23211 22901 23606 23499 23388 22778 23372 23341 23316 22763 23191 23817 23989 22567 23168 23495 23072 22524 23168 24136 23967 22603 22921 23493 23101 22667 22714 23883 24032 22738 22613 23286 23532 22307 22539 23146 24125 23941 22929 22983 23228 23384 22859 22984 22999 23693 23308 23045 22899 23553 23032 23032 22746 23400 23328 23180 22802 23381 23047 23719 22603 23247 23368 23576 22854 23133 23030 23239 22993 23006 23287 23779 22875 23240 23209 23260 22648 23225 23279 23629 22726 23438 23025 23261 22497 23471 23184 23258 22518 23399 22958 23335 22595 23373 23152 23409 22519 23424 23017 23467 22564 23642 23150 23111 22891 23445 22755 23308 22675 23821 22992 23062 22983 23409 22667 23301 23193 23564 22743 23063 23083 23355 22995 23041 23207 23661 22765 23081 23088 23207 22806 22970 23367 23538 22892 23017 23251 23205 23077 22561 22933 24149 23322 22585 23367 23424 23641 23152 23366 23559 23613 23020 23803 23281 23205 23489 23973 23312 23447 23229 23669 22888 23963 23402 23384 23364 23461 22980 23628 23577 23363 23226 23617 23112 23256 23523 23748 22913 52 9571 13050 14572 14942 14841 15440 14848 15897 15606 33600 27182 26530 25184 25456 25172 24896 24508 24713 23876 24408 24422 24576 23855 24536 23612 24110 24210 24285 23599 24289 23984 23884 24081 24084 23495 24238 23580 23676 23680 24371 23316 24233 23505 23643 23724 24097 23319 24134 23399 23623 23936 23904 23324 24065 23465 23525 23816 23821 23215 23951 23378 23540 23796 23903 23305 23889 23334 23488 23725 24065 23104 23783 23341 23414 23766 23845 23273 23793 23412 23727 24000 23376 23318 23738 22935 23895 24178 22848 23872 23399 22710 24368 23431 22959 23719 23440 22714 24225 23952 22935 23816 23651 22747 24055 23769 22909 23812 23319 22850 24384 23536 23015 23730 23363 22730 24194 23719 22883 23814 23260 23177 23573 23920 23169 23431 23373 23425 23040 23534 23641 23583 23094 23543 23345 23520 23051 23234 23528 23821 23246 23273 23222 23624 23159 23585 22822 23349 23264 23842 23495 23476 23082 23352 22985 23490 23182 23656 23324 23713 23175 23488 22992 23304 23023 23895 23476 23588 22768 23384 23098 23683 23100 23381 23225 24014 23310 23402 22881 23891 23015 23641 23184 23461 22841 23349 23431 23886 23145 23270 23013 23677 11707 16803 16926 17254 17590 18207 17383 18628 17569 18577 26348 26085 24917 25004 24412 24480 24011 24262 24256 23927 23786 23938 23770 23975 23334 24434 23696 23987 23896 23800 23582 24314 23554 23825 23842 23569 23648 23804 23463 23712 23136 24114 23281 23848 23625 23408 23395 23486 23702 23424 23446 23373 23772 23290 23436 23408 23797 23030 23381 23456 23604 23978 22887 23671 22924 23765 23960 22871 23217 23799 22712 24269 23506 23023 23635 23351 22880 24238 23959 22908 23026 23560 23671 22871 23054 24293 23774 22993 22673 23081 23375 23805 23511 23114 22637 22932 23693 23991 23845 23504 23565 23158 23200 22909 23193 22968 23448 23155 23342 23191 23355 23109 23343 23250 23400 23133 23353 23084 23416 23086 23355 23068 23440 23077 23449 22869 23226 23085 23403 23008 23174 23047 23222 22755 23162 22808 23180 22955 23296 23127 23592 23471 23861 23385 23776 23420 23796 23239 23576 22818 23253 22837 23475 23117 23645 22932 23377 23106 23178 22696 23227 23004 23725 23388 23746 22915 23245 22887 23576 23042 23418 22248 23310 22681 23236 23186 23845 23346 23587 22732 23304 23029 23543 23076 23140 22863 23239 23060 23832 23338 23652 1012 18096 18543 19363 19081 19596 19142 20153 20001 20049 26452 25062 24246 24424 23852 24064 23577 23643 23872 24171 23504 23488 23408 23927 23503 23598 23117 23460 23571 24009 23217 23305 23335 23661 23230 23254 22787 23521 24048 23799 22736 23340 23681 23287 22720 23108 24091 24064 23153 22709 23489 23410 23054 22656 23489 24344 23243 22606 23511 23541 23023 22669 23744 24246 22970 22660 23156 23603 23205 22574 23552 24220 22980 22678 23482 23188 23113 23057 23671 23212 23142 23104 23453 23184 23128 23436 23506 22917 23405 23193 23351 23161 23657 22983 23081 23289 23255 22824 23476 23379 23058 23197 23221 22780 23456 23397 23115 23045 23373 22844 23296 23382 23461 22862 23519 22778 23395 23324 23147 23121 23360 22665 23780 22973 23392 22999 23159 23028 23720 22637 23590 22826 23117 23261 23280 22839 23400 22725 23388 23367 23396 22790 23532 22951 23253 23339 23184 22967 23382 22541 23737 23069 23213 23048 23283 23052 23640 22720 23441 22904 23088 23291 23143 23113 23233 22711 23725 22664 23637 22817 23223 23287 23126 22873 23389 22503 23675 22868 23328 22852 22997 23324 23177 22964 23290 22660 23522 23121 23080 22980 23209 23004 19630 19858 20839 20309 21281 20746 20828 20941 21223 39569 24872 23641 23866 23078 23901 23499 23364 23344 23045 23496 24013 22733 23605 22984 23325 23914 22484 23563 23153 23015 23998 22446 23621 22972 23287 23848 22607 23266 22684 23885 22976 23313 23092 22494 24154 22473 23579 22737 22969 23943 22536 23502 22885 23548 23320 22768 23103 22903 23463 23137 23002 23266 22610 23618 23017 23233 22975 23028 23397 23000 23202 23093 22987 23539 22896 23379 22743 23225 23233 23063 23047 22977 23282 23181 23027 23223 22935 23613 22753 23400 22651 23579 22806 23200 22932 23050 23241 23200 23011 23202 22781 23682 22647 23388 22925 23284 23141 23194 22939 23075 22964 23481 22895 23258 22566 23788 22560 23488 22583 23576 22663 23416 22734 22978 23191 23093 22993 22632 22809 23557 22798 23315 22556 23741 22681 23467 22600 23357 22963 23222 22767 23030 23216 23074 23022 22948 23127 23494 22694 23405 22444 23736 22535 23429 22716 23542 22727 23465 22557 23305 23026 23318 22804 22954 23182 23115 22941 23128 22641 23627 22656 23394 22814 23368 22944 23266 22845 22999 23236 23018 22967 23123 23044 23297 22871 23155 22489 23621 22728 23254 22379 18582 21783 21529 21784 21321 22713 21504 22253 21961 22016 24649 22665 23477 22537 24119 22941 23468 22853 22751 23961 22688 23301 22931 22839 23878 22552 23179 22391 24080 22293 23368 22829 23373 23180 23077 22912 22552 23988 22358 23261 22707 23513 22723 23326 22818 23144 23244 23008 22896 22759 23391 22938 23040 23003 23240 23040 22834 23130 22664 23558 22672 23313 22739 23450 22801 23252 22800 22950 23391 22995 23037 23142 22809 23622 22589 23399 22441 23579 22625 23336 22647 23286 22933 23170 22734 22954 23095 23033 22919 22728 22848 23543 22682 23265 22485 23643 22605 23401 22659 23127 23012 23037 22976 23239 22951 23342 22759 23095 22512 23697 22408 23379 22525 23527 22892 23272 22757 22985 23141 23104 22943 23149 22920 23488 22820 23244 22542 23585 22592 23415 22072 22990 23083 23040 22912 23189 22920 23341 22859 23173 22519 23540 22731 23328 22722 22953 23194 22837 22985 23216 22840 23488 22556 23317 22704 23417 22956 23092 22828 22864 23267 22977 22976 23138 22664 23672 22551 23282 22453 23688 22939 23248 22887 22629 23714 22489 23476 22810 22952 23782 22408 23282 22274 23897 22365 23386 22476 23025 23616 22450 23320 22604 23734 22665 23306 22766 23059 23441 22545 23041 22332 24028 22943 23070 23098 22848 23432 22684 23225 22595 23358 22941 23142 22821 22727 23245 22982 23049 22973 22740 23458 22660 23117 22583 23504 22720 23201 22797 22983 23158 22944 22997 22831 22741 23349 22729 23146 22430 23632 22528 23352 22290 23143 23096 23028 22811 22931 23191 22937 22848 22678 22658 23629 22453 23357 22372 23540 22673 23271 22674 22898 23095 23094 22800 23121 22469 23621 22440 23310 22852 23316 22903 23125 22679 22855 23156 23095 22733 23218 22439 23498 22686 23206 22742 22965 23149 23008 22944 22819 22403 23666 22440 23380 22521 23222 23047 23015 22748 23178 23077 23217 22602 23243 22608 23304 22997 23005 22880 22813 23261 22970 22951 23245 22705 23479 22614 23268 23161 23044 23173 22892 22944 22802 23084 23093 22903 23004 22296 23941 22200 23501 22778 23143 23383 22481 23108 22384 23651 22645 23125 22876 22854 23740 22167 23323 22264 23759 22833 23037 22849 22529 23834 22245 23318 22576 23280 23493 22567 22809 22563 23318 22947 22999 23069 22691 23459 22679 23143 22663 23463 22732 23124 22860 22744 23260 22844 22935 22984 22798 23408 22577 23190 22545 23493 22608 23243 22721 23320 22817 22970 22735 22842 23160 22896 22922 23160 22953 23227 22765 23116 22471 23467 22721 23200 22695 23024 23049 23009 22746 22884 55 10856 12862 13920 14081 14588 14496 15385 14659 15703 30524 27360 25765 25741 24952 24950 24283 24416 24524 24213 24115 24269 23799 24384 23680 24117 23375 13024 16160 17497 16960 18359 17491 18326 17635 18903 17858 27764 25665 25681 24794 24922 24332 24453 24486 24209 23975 23925 24272 23859 23925 23895 24091 23973 18118 19255 19425 20129 19695 20203 19687 20738 19840 35061 25267 25856 24340 24613 24108 23969 24629 23736 24000 23302 24823 23298 24111 23631 24439 23633 23936 19936 20922 22045 20708 21609 20726 22412 20765 21907 26475 24914 24472 23893 23719 23476 24567 23465 23969 23331 24119 23448 23972 23413 23737 23815 23484 18772 21806 22582 22267 22400 22587 22468 22599 22297 22593 24129 24311 23299 23803 23063 24026 23181 23821 23008 23745 23478 23399 23383 23507 23523 23675 23255 23586 23137 23992 22919 23696 22888 23973 22925 23698 22789 23990 22962 23742 23191 23737 23175 23563 23109 23309 23412 23304 23181 23495 23414 23790 22917 23544 22704 23883 22900 23735 22976 23415 23346 23357 23092 23324 23346 23567 23147 23527 22783 23987 22835 23671 23052 23600 23159 23408 23115 23131 23464 23264 23146 23350 22794 23785 22795 23485 23013 23465 23389 23156 23255 23505 23048 23758 22768 23594 23131 22999 23911 22582 23566 23113 23313 23899 22508 23638 22792 23553 23668 22616 23536 22960 23230 24165 22767 23328 22998 22575 23890 23223 22881 23433 22881 23297 23539 22756 23461 22956 23018 23335 23337 22938 23261 22925 23369 23285 23088 23153 23222 23158 23694 22738 23527 22937 23033 23444 23215 22907 23319 22728 23531 22981 23188 22999 23204 22831 23682 22752 23552 22833 23128 23248 23201 23005 23343 22568 23677 22955 23141 22891 23213 22576 23721 23027 23204 22978 22669 22587 23751 22795 23452 22956 23261 22976 23668 22583 23380 22984 23482 22895 23805 22632 23280 22788 23159 22919 23667 22674 23310 22816 23266 22769 23666 22769 23342 22855 23003 23175 23552 22678 23340 23083 22985 23138 23488 22658 23431 22882 22753 23626 23164 22688 23471 22720 23069 23910 22519 23057 23108 22664 22775 23901 22813 22688 23426 22673 22967 24004 22715 22800 23334 22941 22400 23837 23351 22385 23460 23136 22663 23473 23099 23016 23100 23054 22706 23305 23327 22862 22981 23157 22689 23073 23285 23210 22870 23381 23216 22896 23008 23633 22725 23132 22975 23409 22557 23625 23033 22951 22977 23284 22674 23279 23191 23309 22631 23407 22761 23040 22813 23693 22567 23280 22959 23248 22601 23564 23062 22985 22890 23191 22503 23388 23061 23114 22798 23276 22625 23158 23207 23488 22568 23326 22701 22921 22986 23616 22571 23264 22903 23304 22514 23562 23021 23062 23053 23330 22898 23078 23246 23369 22705 23325 23062 22868 23073 23402 22607 23338 22792 22964 23089 23627 22699 23024 23097 23365 22221 23572 23377 22471 23205 23021 22241 23702 23362 22496 23362 22989 22519 24068 22467 23029 22912 22429 23828 23020 22540 23386 22437 23357 23780 22368 23412 22760 22437 23261 23125 22873 23120 22490 23375 22889 23090 22983 22862 23008 23381 22632 23285 22067 23016 23285 22937 22980 23047 22479 23558 22777 23177 7366 12193 13627 13966 14140 14723 14290 15483 14656 43632 27639 26331 25868 25262 24796 13433 16611 18103 17342 18467 17800 18865 18414 18428 18321 27952 26056 26053 24785 25188 11992 19754 19468 20469 19865 20136 20512 20364 20272 20485 27244 25894 24855 25058 24065 25141 20448 21659 21182 21804 21676 21807 21460 21608 21858 27340 24874 24465 24576 24149 24119 21895 22715 22541 22630 22851 22820 22695 22718 22727 22599 24609 23840 24041 23350 24538 23264 23982 22984 24592 23459 23912 23431 23703 24309 23152 23506 23028 24528 22978 23838 22916 24170 23446 23825 23379 23781 23714 23564 23290 23549 23864 23398 23335 23239 23594 23635 23146 23687 23611 23400 23348 23497 23556 23552 23251 23621 23424 23563 22839 23773 23152 23584 23426 23748 23136 23688 22942 23815 23082 23719 23121 23801 22925 23685 23067 23789 23034 23713 23085 23850 22875 23613 22810 23949 22790 23650 22885 23886 22836 23645 22917 23840 22828 23721 22920 23901 22804 23606 22773 23929 22775 23517 22726 23748 23065 23393 23216 23328 23116 23228 23397 23346 22971 23296 23196 23232 22912 23389 23185 23534 22753 23675 22777 23367 
22521 22551 22441 22282 23015 22256 22577 21907 22882 22720 22860 22017 22749 22295 22592 21801 22881 22562 23080 21788 22769 22263 22837 21800 22821 22551 23055 21829 22704 22247 22713 22134 22600 22408 23262 21856 22476 22220 22842 21760 22450 21883 23217 22620 22583 21807 22892 21989 22488 21577 22807 22483 23134 21831 22604 22193 22811 21999 22563 22599 23138 22019 22327 22215 22791 22127 22603 21984 23032 22505 22461 21892 22876 22162 22554 21593 22918 22808 22220 21937 22897 22112 21936 22025 23744 22736 21619 22019 22873 22272 21607 22665 23723 22432 21543 22061 22999 21876 21652 22115 23561 22371 21629 22532 22672 21693 21871 22923 22742 22320 22105 22832 22199 22300 22366 22885 22336 22316 22576 22416 22093 22240 22671 22901 22050 22345 22334 22596 22065 22380 22705 23024 21970 22334 22285 22569 21880 22477 22488 22964 21977 22359 22219 22880 22121 22338 22140 23150 22101 22419 22122 22896 21895 22303 22262 23202 22321 22305 21990 22932 22183 22609 21768 23203 22454 22567 21829 22886 21933 22535 21707 22861 22658 22804 21817 22799 22171 23001 21672 22943 22419 22881 21598 22852 22067 22629 263 3701 4063 7678 8027 8781 11351 43661 43036 38468 33281 30298 29475 29216 26203 27049 26034 25222 25056 26272 23981 24742 24316 23704 23854 25325 23226 23671 24137 23152 23514 23812 23415 23040 23760 23642 23063 23457 23357 22901 23370 22868 22971 23532 22963 23014 23227 22587 23132 23415 23105 22688 23245 22529 22999 23070 22864 22592 23216 22477 22643 23061 22915 22561 23019 22378 22632 22919 23191 22235 23116 22116 22777 22868 22640 22498 22850 21944 23434 22726 22637 22472 22883 21896 23410 22224 22900 22375 22988 22112 23372 22137 22784 22348 22784 22029 23340 22225 22827 22341 22667 21854 23399 22069 22858 22169 22864 22360 23391 21783 22871 22192 22585 21957 23309 22049 22852 22349 22797 21937 23000 22438 22638 22105 23172 22007 22587 22273 23323 22122 22606 22205 23040 22127 22690 21933 23141 22642 22979 21754 22714 22360 22737 22087 22740 21852 22681 22617 23200 22528 23024 22183 22480 21796 22428 21884 22493 21889 22496 22054 23089 22736 22740 21693 22259 22135 22915 22088 21857 21975 23608 23138 22599 21399 22069 22352 23120 22455 21959 21361 22100 22875 23876 22617 21865 21561 22556 22408 21661 99 1671 5103 8625 11201 11499 14256 13388 14563 43641 42922 35136 32282 28912 28316 26912 26396 25493 25328 24580 24603 24776 23996 23945 24208 23255 23833 23524 23357 23469 23297 22980 23583 23059 23320 22951 22967 23255 23183 22757 23485 22440 23109 22563 23256 22553 22985 22851 22859 22528 23006 22828 22758 22392 22898 22690 22726 22358 23026 22336 23331 21949 22992 22283 22960 22684 22547 22209 23174 21910 23460 22299 22903 22352 22768 22007 23324 22362 22548 22148 22896 22365 22625 22205 23421 22237 22585 21848 22830 22207 22985 21984 22678 22075 23253 22624 23328 22423 22736 22052 22598 21897 22887 21999 23019 22131 23041 22097 22951 22160 23056 22209 23067 22272 22941 22309 22945 22364 22889 22218 22863 22283 22933 22343 22961 22210 22778 22311 22842 22244 22850 22223 22737 22044 22651 22087 22656 21712 22436 21792 22144 21687 22407 21704 22209 22164 23243 23042 23680 23207 22902 21789 21775 21270 22217 22512 22994 22409 22380 21773 22201 21438 21818 22336 23600 23481 23079 21741 21685 21877 22953 22631 22534 22169 22088 21380 22219 22827 23737 23162 22194 21837 22225 22759 22231 22502 21996 22224 22185 22678 22745 124 5697 10219 12931 14681 15315 16327 16411 17524 18064 41099 33100 29507 27295 26672 25425 25041 24205 24345 24169 24393 23552 23416 23065 23687 23200 23479 22713 23202 22960 23624 22867 22783 22632 23345 22656 23448 22149 23018 22922 23249 21988 23030 22553 22909 22090 22960 22601 23459 22150 22647 22480 22988 22191 22540 22506 23258 22169 22564 22488 22912 22233 22511 22456 23413 22325 22536 22225 23069 21963 22437 22361 23186 22145 22663 22284 22873 21852 22752 22592 22769 21761 23040 22112 22808 21893 23296 22133 22603 22128 22686 21637 22967 22503 22805 22019 22992 21956 22428 22493 22898 21791 22915 22222 22296 22466 23033 21814 22892 22043 22562 22055 23239 21764 22869 22113 22272 22414 22962 21779 22936 21878 22447 23090 22135 22399 22534 21313 23450 22305 22041 22502 21924 22320 23571 21387 22871 22047 21685 22341 23797 21839 22293 22439 21973 22487 23406 21337 22952 22005 21936 23400 22063 22177 22344 21409 23112 22982 21746 22669 21723 22321 22683 22232 22417 22357 22420 22828 22131 22576 22072 22656 22551 22109 22551 22033 22360 22960 21956 22618 22176 22538 22625 22233 22393 22912 21834 23158 21989 22614 22182 22023 9752 13985 15830 17424 17357 19371 18552 19457 19094 37879 30804 27520 25730 25030 23986 24701 23099 23929 23066 23232 23237 23180 22695 23250 22083 23559 22419 23059 22342 22758 22814 22968 22232 22915 21972 23357 22161 23063 22176 22701 22628 22779 22299 22889 22280 23220 21912 22922 21677 23273 22024 22821 22161 22551 22553 22563 22249 22823 22219 23188 21784 22955 22122 22841 22439 22558 22126 22552 22179 23122 21849 22787 21824 23179 21845 22931 22044 22320 22471 22468 22297 22088 22042 23153 22001 22873 21687 23023 21907 22783 22080 22566 22461 22405 22256 22656 22018 23158 21778 22748 21774 22884 22179 22459 22220 21948 22993 22112 22406 21898 21322 23765 21349 23063 21657 23055 22246 22751 22008 22080 23168 21670 22704 22374 22232 23034 21579 22709 21283 23745 21493 22888 22069 22598 22810 21846 22343 21590 23440 21675 22666 22059 22589 22744 22343 22135 22161 22729 22362 22321 22350 22535 22689 22221 22336 22008 22820 22096 22480 21926 22816 21969 22637 22317 22442 22537 22112 22308 22327 22224 22732 21946 22466 22039 23007 21799 22674 21824 22891 22133 22541 22035 22173 22528 22402 22224 22528 22024 22864 21846 22684 13077 18183 18202 20091 19569 20960 20358 20907 20464 20883 27607 25367 24022 23735 23043 23914 22331 23307 22361 23216 22630 22896 22299 22550 22726 22647 22408 22832 22403 22886 22167 23044 21795 23343 21753 23032 21779 23234 21965 22905 21549 22815 22491 22657 22121 22384 22512 22535 22251 22820 22474 23048 22023 22725 21730 23248 21836 22933 21847 23121 22103 22816 22049 22605 22477 22429 22327 22410 22208 23075 21915 22718 21762 23220 22021 22778 22338 22656 22392 22581 22161 22086 22621 22272 22336 22417 21879 23415 21648 22823 21344 23754 21358 22912 21749 22317 23149 21640 22536 21829 23268 22282 21734 22460 21406 23801 21303 22922 21637 23015 22566 22159 22137 21626 23357 21595 22641 22088 22093 23529 21511 22619 21459 22875 22186 22439 22605 22119 22825 22007 22664 22004 22656 22375 22433 22287 22106 22803 22160 22384 22495 22346 22865 21948 22623 21927 22828 22315 22387 22192 22155 22641 22496 22317 22537 21941 23012 21875 22743 21939 22453 22546 22308 22251 22330 22471 22592 22144 22583 21968 22984 21739 22757 21728 23168 21849 22727 21887 22411 22400 22547 22120 22993 22067 22872 21927 22669 21634 23105 22001 22688 21854 22784 22197 22613 21882 22391 22471 22479 22187 22748 22004 23161 21724 22863 21767 23164 21798 22931 21989 22567 22438 22509 22088 22821 21896 23126 21804 22821 21744 23111 21851 22897 22377 22544 22432 22418 22195 22332 22417 22759 21792 22619 21574 23114 21814 22839 22082 22830 22237 22503 22144 22224 22444 22494 22159 22507 22053 23360 21639 22698 21328 23447 21774 22745 22130 21987 23172 21572 22791 22198 21771 23586 21328 22886 21527 23008 22188 22242 22144 21629 23296 21771 22576 22226 22244 23725 21369 22883 22538 22011 23399 21475 22574 22030 22540 22492 22375 22260 22295 22502 22391 22256 22307 21945 22912 22157 22419 22181 22225 22766 22194 22167 22453 21854 22955 21863 22821 21827 22491 22560 22238 22313 22284 22208 22979 21767 22784 21790 22897 21989 22741 21948 22481 22477 22336 22085 22471 22308 22569 22021 22674 21624 23165 21686 22860 21401 22637 22344 22479 22024 22261 22444 22679 21991 22673 21811 23124 21653 22881 21736 23001 22035 22645 22013 22386 22485 22400 22090 22696 22103 23083 21721 22832 21526 23203 21766 22900 21824 22721 22218 22592 22181 22731 22016 22941 21872 22610 21637 23100 21944 22898 22480 22606 22353 22424 21986 22313 22600 22453 22269 22656 22313 22805 22113 22496 21741 23205 21617 22807 21780 22011 23017 21805 22393 21994 22775 21897 22389 22184 125 88 371 3968 5715 9685 8789 11197 10796 13233 43664 42710 36640 32408 31650 28118 28038 26632 26610 26265 24564 25433 23801 25639 24138 24325 23928 119 2840 8071 11140 12967 14226 15168 15088 16469 43633 43699 36823 32085 30497 27874 27524 25985 26599 25053 25431 24680 25073 24439 24500 23800 24119 24115 4035 9992 13420 15569 16450 17124 17842 18532 18739 43663 36146 31089 29441 26808 26653 24928 26072 24166 25162 23760 24739 23808 24188 23351 23832 23583 4000 11655 15449 17461 18384 18806 19674 19584 20485 19884 35776 29212 28391 25420 25925 24234 25166 23879 24505 23432 23891 23650 23746 23067 23424 23420 23380 14235 18263 19393 20365 20397 21121 20505 21953 20672 21832 27592 26599 24379 24643 23673 24135 23369 23488 22904 23063 23283 23176 22855 23213 22437 23904 22446 23421 22147 23840 22431 23431 22186 23871 22472 23285 22533 22966 23504 22244 22616 22062 23743 22025 22891 22256 23081 22899 22537 22593 21675 23780 22009 23180 22168 22721 23240 21958 22899 22151 23150 22166 22935 22329 22437 23047 22308 22582 22544 22889 22647 22486 22550 22024 23227 22035 22999 22382 22888 22647 22487 22539 22448 22704 22853 22016 22798 21931 23200 22406 22672 22160 22315 22717 22785 22213 22785 21687 23156 22121 22738 22055 22498 22582 22723 22168 22715 21922 23280 22023 22872 22126 22391 22343 23232 21741 23015 21888 22896 22539 22428 22211 22704 21659 23179 22203 22533 22225 22611 21879 23296 21656 22949 21890 22474 22530 22631 22160 22723 21751 23179 22208 22560 22215 22520 22281 23169 21811 22981 22113 22513 22629 22478 22251 22808 21524 22969 22325 22235 22368 22168 22390 23353 21309 23066 22323 22093 23398 22212 21969 22765 21772 22214 23479 22080 21902 22862 21678 22535 23285 21797 22482 22403 21384 23026 22989 22070 22856 22157 22179 22477 22935 21979 22536 22341 22072 22600 22829 21821 22669 22212 22201 22340 22986 21788 22766 22254 22305 22643 22548 22150 22769 22144 22363 22594 22520 21979 22733 22125 22607 22496 22362 22228 22772 21617 23032 22208 22499 22217 22548 21828 22989 22325 22380 22202 22677 21645 22967 22412 22494 22117 22832 21921 22653 22601 22597 21815 22790 21901 22464 22442 22880 21703 23120 21873 22322 22317 23088 21719 22935 22059 22419 22173 23155 21767 22739 22305 22627 21623 23016 22520 22403 21979 22755 22061 22531 22528 22615 21773 22997 22130 21943 22204 23605 22260 21955 22652 22382 21251 22907 23079 21735 22006 22670 21562 22452 23127 22896 21324 23096 21980 21515 23009 23227 21244 22708 22199 21831 21852 23465 22481 22172 22597 22437 22230 22512 22843 22109 22426 22415 22289 22073 22894 22192 22365 22281 22601 21932 22528 22544 22404 22343 22596 21836 22283 22650 22519 21800 22892 21415 22295 22415 22954 21856 22545 22073 22741 21786 23143 21960 22483 22117 22583 21868 23159 21781 22745 22028 22437 22284 23005 21741 22815 21995 22720 22304 22632 22005 22689 21767 23118 21872 22529 22149 22605 21913 23217 21671 22910 21964 22668 22381 22549 22119 22695 21445 23156 22179 22467 22098 22325 22405 22945 21667 22736 22038 22665 22384 22315 98 51 2015 6304 7320 9870 10345 11899 12506 43648 43680 40027 34368 32513 28592 122 5785 12195 13458 14960 15515 15947 17771 17355 43619 43673 36641 34598 30105 29347 721 10305 15525 15940 18027 18379 19269 19781 18952 19835 40769 34603 30652 28800 27060 7591 14505 16793 19031 19295 20840 20203 21025 20615 21399 36662 31240 28218 27298 26211 25814 17927 20317 21003 21732 21452 21994 22023 22151 21697 31220 27776 26056 25134 25021 24537 24327 23911 24148 23725 24468 23069 24077 22745 24265 22872 23911 22712 24010 22880 23701 22787 23284 23153 23303 22676 23110 23076 23111 22656 22929 23015 23143 22720 22778 23008 22955 22576 22917 22760 22935 22541 22856 22900 22876 22371 22692 22871 22813 22372 22836 22857 22706 22361 22689 22747 22887 22283 22751 22576 22941 22282 22775 22634 22629 22329 22380 22919 22401 22313 22412 23096 22720 22585 23248 22111 22673 22133 22435 23243 22176 22296 22343 23092 22423 22285 22588 22876 22575 21860 23093 22043 23158 21881 23686 21539 22638 22235 22862 22552 22205 22638 22343 22772 22339 22932 22155 22679 21949 22976 22072 22466 22439 22577 22427 
