# Supplementary material for: An Active Feature Selection Strategy for DWT in Artificial Taste
Source: Hindawi journal article supplement (doi:10.1155/2018/9709505), 2018-01-01
Supplement: f1 [file 9709505.f1.zip › blackTea-hi-3.txt]

43472 43474 43474 43472 55 2345 17824 21344 21085 21824 21963 22538 22113 22360 22263 23093 22553 22562 22394 22935 22357 22552 22452 23324 22616 22768 22445 23042 22369 22498 22577 23537 22502 22401 22876 22936 22396 22190 22844 23822 22528 22162 22801 23091 22598 22060 22302 23750 23093 22115 22791 23028 22497 22252 22727 23770 22809 22196 22432 23133 22556 22160 22660 23728 23040 22384 23029 22656 22785 22325 23170 23072 22901 22580 23104 22761 22807 22296 23101 23057 22989 22497 23151 22587 22794 22496 23445 22889 22845 22536 23152 22510 22784 22528 23530 22579 22832 22630 23082 22573 22861 22528 23507 22530 22819 22452 23245 22318 22936 22746 23515 22206 22946 22682 23220 22776 22976 22344 23500 22860 23166 22187 23200 22464 23081 22181 23052 22768 23485 22231 22952 22688 23130 22250 22812 22829 23396 22377 22951 22636 23096 22794 22811 22467 23588 22596 22828 22557 23115 22432 22759 22493 23486 22878 23072 22345 23143 22641 23127 22320 23176 23028 23157 22260 23048 22745 22976 22312 22738 22914 23399 22727 22650 22505 23196 22744 22745 21876 23073 23547 23431 21904 22459 23022 48 14828 18728 20244 20996 19688 20064 20851 20682 20027 31662 25432 25346 24267 22964 22642 23556 23424 23029 22354 23457 23994 23250 22954 22963 23277 22743 23072 22565 23506 23144 23043 22629 22952 23028 22972 22862 22768 23034 23515 22903 22840 22763 23243 22583 23008 22476 23496 23005 22918 22394 23279 22705 23171 22327 23217 23010 23489 22538 22921 22603 23162 22807 22950 22535 23452 22848 22990 22313 23293 22600 23154 22171 22994 22621 23544 22541 22917 22530 23299 22423 22891 22295 23445 22940 23105 22221 23216 22611 23143 22104 22966 22316 23513 22730 23027 22286 23362 22560 23008 22338 22866 23000 23476 22660 22967 22456 23405 22395 23190 22240 23160 22870 23363 22262 22887 22567 23239 22452 22940 22310 23250 22960 23219 22239 23077 22759 23099 22451 22698 22514 23445 22950 22785 22560 23187 22490 23003 22215 23084 23060 23388 22288 22648 22724 23083 22544 22209 22318 23619 23539 22544 22033 23098 22848 22583 21941 22717 23603 23429 22133 22143 22548 23146 22600 22419 21991 23336 23724 23339 22056 22486 23104 22992 22543 22292 22215 23543 23860 22567 22704 22758 23108 22519 22828 22415 23299 23061 22854 22483 22848 22889 18220 20326 20804 21296 21919 21363 21482 21447 21934 39296 25217 23566 23610 23377 23900 23190 22985 22820 23572 22761 23137 22360 23459 23020 23480 22416 23223 22769 23148 22474 22976 22775 23600 22546 22964 22495 23340 22482 23095 22261 23513 22807 23133 22166 23255 22471 23182 22256 23169 22823 23395 22305 23021 22650 23239 22298 22855 22809 23561 22251 23045 22594 23191 22375 22908 22644 23620 22472 22906 22551 23232 21844 22829 22632 23591 22503 22970 22589 23224 22504 22812 22214 23485 22814 22995 22339 23213 22605 23380 22240 22922 22896 23405 22521 22830 22656 23164 22506 23127 22336 23016 22906 23349 22433 22780 22752 23172 22484 22856 22200 23008 22987 23396 22308 22471 22608 23213 22639 22519 21840 23072 23683 23575 22336 22209 22561 23322 23049 22748 22274 22182 22508 23736 23560 22733 21960 22720 23053 22811 22508 22449 22018 23081 23704 23508 22272 22107 22900 23160 22567 22292 22176 23016 23368 22900 22764 22415 23155 22644 22949 22464 22608 22852 23328 22850 22697 22485 23107 22709 22913 22600 22618 22788 23419 22833 22827 22452 23246 22558 23062 22258 22839 22785 23445 22592 22744 22365 23140 22522 23298 22210 16989 21015 22185 21338 21830 21674 22432 21735 22193 21492 25613 23725 23809 22642 23410 22775 23478 22544 23013 22516 23656 22565 22975 22712 23192 22298 23168 22858 23528 22438 23015 22652 23056 22140 23174 22802 23333 22180 23328 22529 23160 22189 23198 22872 23545 22553 22956 22435 23274 22441 22908 22293 22758 22695 23642 22679 23057 22186 23135 22567 23208 22306 22992 22127 23104 22733 23585 22852 23181 22608 22823 22345 23029 22582 23151 22516 22929 22336 22630 22281 23044 22777 23403 23017 23261 22679 23197 22552 22806 22439 22866 22616 23143 22668 23110 22580 22954 22381 22695 22028 22593 22432 22876 22843 23616 23463 23676 23101 22632 21920 22164 22030 22632 22972 23268 23033 23186 22759 22756 22488 22677 22054 22128 22144 22860 23215 23817 23544 23165 22281 22100 21927 22212 22547 23124 23144 23098 22661 22683 22394 22264 21996 22158 22663 23315 23290 22969 23262 22892 23112 22503 22791 22324 22871 22651 23104 22721 22892 22567 22807 22606 22871 22502 22652 22356 22793 22661 23168 23044 23416 22992 23379 22684 23008 22336 22772 22275 22848 22508 23086 22694 23006 22600 22935 22408 22953 22349 22827 22183 22952 22468 23354 21400 22607 22144 22880 22257 22578 21756 22342 21761 26424 22971 23543 22871 23477 22588 23267 22552 23645 21934 23164 22308 23013 22071 22888 22365 23212 22685 23547 22873 23427 22657 23159 22217 22891 22272 22903 22295 23069 22521 23315 22549 23217 22387 23175 22279 23045 22186 22869 22206 23060 22597 23552 22776 23367 22823 23450 22716 23100 22238 22903 22176 23161 22565 23254 22483 23129 22379 23201 22747 23096 22011 22792 22235 23240 22827 23521 22840 23310 22473 22819 22258 22980 22634 23127 22633 22961 22477 23031 22124 22721 22294 22944 22758 23335 22929 23436 22803 23040 22374 22755 22265 22809 22374 23111 22651 23142 22661 22945 22533 22755 22416 22382 21896 22598 22156 22878 23192 23691 23607 23788 23377 23041 22565 22487 22009 22220 22125 22786 22938 23286 22999 23191 22761 22695 22471 22536 21906 22120 22311 22940 23251 23824 23628 23426 22979 22824 22009 22085 22120 22775 22947 23201 23108 23104 22791 22734 22470 22549 22538 22309 22631 22357 22821 22706 22946 22690 23289 22922 23376 22974 23156 22712 22810 22438 22666 22392 22675 22412 22810 22752 23067 22814 23072 22644 22946 22432 22872 22952 23009 22402 22759 20826 22314 22197 22868 22663 22997 22561 23091 22598 22989 23002 23248 22423 22936 22252 22935 22296 22876 22450 23142 22648 23225 22613 23264 22556 23040 22343 23277 22530 23181 22317 23028 22236 23033 22093 22695 22113 22939 22340 23276 22602 23466 22788 23561 22752 23512 22850 23662 22792 23328 22572 23086 22572 22976 22228 22809 22116 22978 22308 23164 22277 23180 22488 23281 22544 23196 22460 23078 22261 23014 22680 22971 22285 22920 22053 22681 22274 22700 22192 23034 22467 23207 22471 23328 22743 23606 22813 23457 22784 23509 22869 23426 22732 23502 22704 23268 22622 23056 22405 22880 22193 22812 22234 22749 22257 22819 22468 22957 22585 23137 22625 23120 22539 23031 22469 23026 22425 22946 22255 22967 22329 22755 22240 22656 22176 22717 22416 22848 22683 23213 22871 23552 23248 23735 23175 23416 22770 22748 22154 22406 22052 22108 22060 22544 22765 23246 22996 23081 22831 22788 22498 22119 22470 22465 22134 22214 21945 22008 21964 22500 22628 23271 23354 23738 23623 23780 23634 23574 23152 23083 22409 22228 22055 22135 21984 22086 22297 22579 22951 22784 23064 22598 22884 22577 23096 22377 22685 22307 22828 22597 23012 22892 23228 23109 23252 23032 22904 22565 22720 22288 22771 22361 22890 22592 23069 22746 23080 22797 23109 22632 22916 22528 22836 22432 22820 22341 22634 22220 22869 22344 23296 22713 23370 22890 23382 22713 23152 22422 22861 22130 22839 22506 23232 22531 23094 22440 22972 22266 22919 22373 23012 22127 22788 22099 23060 22538 23217 22701 23465 22876 23388 22930 23476 22656 23214 22560 23032 22253 22827 22224 22919 22293 23057 22475 23222 22487 23216 22439 23088 22367 23025 22376 22743 22108 22812 22353 23284 22749 23501 22848 23498 22776 23364 22333 22983 22120 22888 22356 23145 22572 23149 22496 22971 22391 23043 22408 22718 22074 22685 22429 23121 22852 23410 22844 23131 22337 22741 22288 22785 22512 23021 22770 23175 22612 23143 22712 23072 22556 22900 22503 22756 22440 22423 21917 22066 22071 22633 22845 23428 23467 23872 23648 23445 22787 22400 22021 22084 21976 22491 22512 23064 23046 23086 22992 23178 22792 22797 22528 22653 22361 22358 22327 22174 21980 22103 22440 22259 22916 22675 23177 22833 23360 23008 23335 22964 23216 22791 22808 22585 22704 22329 22673 22343 22684 22327 23015 22567 23150 22624 23157 22593 22951 22606 22824 22439 22923 22471 22980 22444 23042 22221 22764 22109 22800 22405 22896 22461 23312 22650 23411 22893 23431 22804 23461 22748 23313 22480 23104 22116 22859 9725 19237 19756 20711 20303 21080 20427 21116 20541 43817 26121 24692 23254 23575 22765 23326 22628 23355 22851 23621 22987 23792 23121 23645 22929 23630 22787 19339 20375 21350 20977 22005 21457 22187 21504 22339 39978 25333 23633 23886 23025 23489 22928 23392 22885 23221 22720 22950 22362 22912 22449 22848 22502 44 20679 22033 21929 22726 22246 22825 22322 22770 22601 27857 24535 24213 23539 23476 23001 23047 22889 22999 22444 22509 22378 22784 22295 22305 22097 22405 16796 21729 22244 22628 22577 22688 22339 22679 22440 22386 24268 23225 22672 22812 22428 22175 22528 22576 23043 22769 23372 23078 23473 23048 23481 23261 23374 21461 22688 22492 22576 22040 22498 22182 22641 22147 22660 23158 23333 22942 23350 22866 23168 22584 23189 22472 22499 22365 23082 22279 22824 22264 23009 22355 22927 22528 23337 22602 23383 22857 23537 22763 23526 22801 23574 22796 23588 22910 23520 22832 23474 22790 23212 22448 23107 22134 22994 22196 23033 22151 22953 22248 23012 22502 23141 22642 23127 22713 23184 22572 23241 22418 23264 22406 23033 22404 23108 22449 23056 22340 22984 22253 22683 22106 22764 22343 23012 22616 23085 22725 23384 22983 23414 22978 23472 22968 23173 22677 23066 22553 22771 22128 22422 22016 22389 22257 22574 22592 23008 22921 23108 23097 23251 23008 23020 22624 22775 22565 22578 22151 22659 22217 22222 22060 22129 21924 22149 22374 22423 22400 22743 23108 22825 23192 22902 23356 23033 23275 23030 23266 23127 23331 23016 23296 22885 23162 22676 23040 22383 22804 22265 22813 22341 22720 22420 22946 22558 23057 22333 23117 22536 23165 22622 23216 22518 23296 22572 23216 22564 23177 22556 23328 22437 23308 22556 23254 22592 23215 22572 23160 22550 23139 22518 23225 22437 23178 22428 23297 22545 23208 22569 23156 22600 23156 22689 23205 22575 23232 22499 23025 22248 23029 22394 22919 22329 22954 22471 22942 22498 23059 22503 22919 22487 22943 22535 23035 22465 23024 22536 23031 22400 22680 22394 22840 22354 22593 22152 22284 21944 22118 21885 22172 21974 22297 22157 22274 22017 22213 22120 22324 22144 22417 22236 22541 22375 23232 23287 23331 23202 23282 23114 23268 23484 22953 23176 22848 23301 22972 23281 23015 23296 23040 23272 23020 23312 23075 23268 22873 23337 22824 23258 22769 23324 22843 22845 22520 22834 22338 22771 22174 22808 22151 22695 22118 22720 22014 22801 22341 23056 22417 23094 22373 23380 22520 23093 22222 23057 22405 23072 22295 23030 22419 23084 22503 23253 22456 23216 22517 23206 22496 23320 22441 23193 22504 23171 22414 23011 22353 22980 22252 22924 22140 22813 22192 22890 22097 22848 22156 23009 22508 23083 22528 23239 22766 23369 22800 23312 22860 23207 22817 23418 22902 23260 22864 23389 22759 23129 22496 22716 22085 22389 21834 22098 21900 22232 22254 22573 22413 22801 22508 22676 22660 22854 22736 22828 22778 22948 22695 22960 22853 23148 23088 23248 23093 22576 22392 22352 22071 22130 22370 22508 22764 22288 22676 22197 22629 22391 22741 22601 22800 22716 23046 22792 23087 22859 23328 22848 23297 22973 23449 22814 23232 23107 23316 22707 52 16593 20337 20320 20949 20521 21132 20626 21196 20609 35221 24470 24071 22988 23673 22914 19989 20805 21709 20888 22093 21423 22240 21585 22317 42423 25372 23752 24048 23254 23703 18513 21826 21530 22455 21687 22218 21605 22199 21653 22378 24461 24098 23292 24101 23258 16862 21881 23013 22382 22999 22488 22599 21997 22415 21958 24854 23143 23507 22850 23296 22737 22486 22312 22957 22475 22917 22553 22958 22390 22667 24343 22785 22384 22714 22800 23335 23426 23794 23577 23998 23457 23671 23036 22860 22400 22189 21989 22147 22263 22505 22522 22552 22568 22826 22840 23052 23280 22917 22920 22575 22852 22337 22896 22483 22871 22748 23161 22854 23290 22885 23383 23019 23441 23007 23468 22871 23211 22576 22828 22400 22701 22311 22789 22292 23118 22391 22991 22483 23013 22528 23199 22633 23325 22678 23253 22455 23083 22217 22880 22204 23049 22443 23479 22872 23463 22828 23400 22548 23196 22321 22920 22089 22776 22256 23137 21978 23056 22421 23044 22612 23132 22603 23038 22232 22920 22152 23041 22496 23374 22867 23580 22813 23221 22395 22679 22057 23025 22863 22904 22514 23040 22681 23184 22648 
21388 22355 21941 22391 21294 22341 21613 21760 21944 22030 21593 22407 21321 22647 21597 21929 21547 22188 21376 22499 21049 22128 21655 22022 21796 21900 21374 22393 21264 22592 21500 22209 21456 22048 21702 22419 21104 20960 21719 21369 22502 21354 21847 21408 22094 21283 21977 21271 22429 21569 21876 21533 22229 21287 21905 21377 22570 21525 22047 21314 22224 21456 21881 21357 22493 21624 21914 21497 22288 21585 21946 21424 22585 21312 21946 21440 22332 21578 21787 21511 22500 21442 21955 21695 22029 21322 21977 21749 22489 21296 21981 21673 22065 21322 22007 21817 22321 21287 22232 21561 21984 21158 21835 22391 22582 21007 22039 21812 21665 20951 22437 22565 21952 20899 22065 21939 21987 21496 21199 21809 22966 22087 21307 21457 22314 21508 21427 21251 22550 22666 21675 21044 22094 21983 21940 21594 21851 22369 21637 21851 21827 21969 21691 21701 21750 22203 22027 21697 21757 22085 21563 21924 21488 22177 22087 22075 21472 22151 21716 21697 21159 22115 21953 22302 21280 22026 21796 22065 21554 21835 21592 22528 21840 21961 21378 22277 21568 22583 21195 22120 21827 22469 21271 22064 60 55 0 4257 6430 8748 8648 10057 10313 11375 43442 32727 26906 25723 23760 23659 22156 22999 22024 22785 21475 22450 22077 22567 21524 22209 21698 22279 21360 22018 21539 22784 21683 22049 21345 22368 21431 22210 21060 22344 21839 22341 21181 22161 21628 22113 21461 21802 21853 22439 21461 21799 21688 22130 21291 21808 21527 22250 21898 22119 21265 22090 21620 22052 21152 21449 22021 22866 21725 21257 21465 22301 21358 21705 20866 21717 22534 22307 21137 21574 21872 21953 21219 21122 21716 22909 22128 21369 21232 22265 21976 21719 21120 21261 22138 22826 21705 21187 21432 22112 21850 21575 21604 21532 22191 21859 21915 21500 22036 21689 22203 21402 21642 22050 22112 21831 21671 21560 22019 21530 21830 21216 22074 21918 22191 21395 21817 21690 22147 21616 21761 21380 22336 21920 22094 21437 22188 21568 21980 21261 21878 21799 22420 21432 21839 21456 22245 21392 21860 21209 22304 21739 22242 21095 22227 21504 22076 21068 22064 21729 22497 21629 21873 21351 22320 21347 22139 20929 22257 21719 22477 21195 22105 21339 22336 21396 22016 21070 22304 21820 22239 21175 22068 21533 22156 21347 21830 21604 22656 21428 22045 60 58 7947 12041 12118 14185 14487 15405 14651 15710 43366 32600 26027 24393 22776 23089 22679 22867 21743 22272 21877 22360 21489 21997 21433 22544 21877 22005 21463 22240 21616 21968 21024 22210 22445 22315 21248 21477 21907 21995 21349 21218 22012 22907 21534 21195 21783 22261 21463 21245 21213 22555 22354 21750 20992 22119 21576 21519 20983 22359 22590 21685 21108 22090 21611 21603 20931 21892 22691 21915 21618 21684 22043 22016 21657 21624 22313 21783 21651 21733 21894 21608 21728 21448 22041 22009 21923 21329 21902 21739 21861 21413 21656 21801 22484 21746 21805 21504 22087 21540 21947 21370 21968 21779 22488 21560 21809 21390 22231 21520 22180 21171 21975 21760 22473 21485 21908 21349 22265 21431 21981 21044 22095 21688 22572 21508 21933 21297 22137 21541 22202 21397 21825 21174 22280 21869 22281 21330 21975 21523 22191 21422 22226 21006 22073 21565 22614 21409 21960 21351 22189 21440 22087 21272 21908 21826 22432 21398 21954 21361 22425 21376 22096 21072 22152 21762 22464 21440 21905 21323 22285 21402 22035 21140 21958 21811 22429 21411 21968 21597 22145 21480 21930 21095 22074 21984 22468 21335 21778 21621 22203 21398 121 12544 15902 16741 17465 16825 17824 17846 18399 18037 30848 24567 24175 23329 22478 21315 22027 22327 21961 21095 21895 22704 22112 21064 22308 21543 21504 21015 22316 22558 21587 21191 22297 21557 21505 21480 22855 22171 21197 21499 22266 21495 21364 21105 21856 22416 22862 21591 21104 21964 21751 21844 21624 21606 21514 22301 21949 22195 21440 21664 21815 21992 21664 21954 21433 21611 21606 22179 22016 22337 21971 22119 21395 21786 21511 22071 21676 22028 21510 22022 21416 21588 21464 22119 21777 22355 21965 22470 21827 22135 21439 21869 21279 22007 21459 22139 21664 22135 21339 21968 21541 21970 21193 21795 21234 22140 21625 22496 21870 22540 21581 22211 21149 21934 21239 21963 21328 22181 21641 22268 21461 22097 21360 21825 21178 21714 21288 22294 21730 22474 21567 22339 21395 22067 21021 21982 21351 22265 21497 22238 21287 21930 21404 22003 21125 21973 21657 22422 21740 22577 21897 22588 21505 22320 21213 21970 21304 22278 21560 22428 21496 22304 21399 22109 21364 22167 21318 21803 21208 21867 21466 22341 21850 22496 21901 22321 21596 22203 21420 21914 21337 21953 21519 22247 21703 22180 21483 22099 21811 22162 21344 52 15393 18591 18599 19699 19461 20399 20170 20686 20180 31544 24000 22572 21461 21661 21709 22167 22151 22400 22025 22377 21968 21919 21494 22055 21449 21377 20931 21223 21383 22209 22487 22960 22651 22602 21902 22326 21824 21569 20963 21147 21088 21752 21860 22240 21947 21920 21621 21697 21363 21457 20966 21088 21004 21465 21792 21772 22249 21933 22411 21940 22092 21585 21616 21472 21884 21747 22098 21825 21955 21773 21825 21577 21898 21269 21569 21620 22064 21920 22381 22007 22119 21492 21773 21456 21955 21585 22126 21685 21964 21491 21961 21274 21665 21285 21767 21578 22326 21817 22451 21827 22216 21464 22060 21305 21980 21400 21989 21653 22318 21640 22063 21402 22518 21248 22008 21064 21849 21214 22083 21490 22327 21844 22662 21797 22451 21539 22095 21214 21905 21202 21980 21399 22164 21621 22179 21477 22126 21078 22053 21256 21797 21239 22353 21733 22601 21784 22551 21556 22247 21240 21873 21163 21929 21351 22283 21689 22297 21520 22151 21393 21931 21517 22247 21155 21946 21001 21831 21220 22222 21568 22427 21730 22661 21805 22445 21512 22218 21518 22092 21193 21895 21339 22012 21495 22187 21647 22234 21577 22231 21504 22151 17648 20433 20029 20741 20320 20896 20608 21281 20856 35012 23591 22979 22162 22481 21900 22471 21792 22236 21473 21961 21241 21856 21447 22078 21668 22241 21874 22288 21762 22244 21665 22234 21712 22029 21499 21780 21565 21607 21072 21319 20928 21138 20969 21126 20871 21436 21352 22045 21873 22348 22376 22854 22513 22861 22619 22725 22185 22087 21335 21554 21382 21586 20946 21290 21134 21533 21597 22103 22018 22336 22002 22144 21826 21767 21820 21539 21936 21971 22004 21558 21653 21413 21637 21272 21746 21448 21760 21632 21816 21578 21784 21906 21989 21911 22075 21824 22317 22006 22386 22041 22237 21947 22285 21819 22196 21648 22065 21504 21740 21296 21772 21538 21888 21696 22188 21625 22229 21687 22121 21638 22090 21431 22005 21504 22091 21362 21826 21421 21768 21208 21921 21275 22057 21559 22353 21839 22533 21761 22535 21788 22493 21608 22283 21287 22016 21264 22093 21414 22221 21522 22301 21704 22332 21524 22184 21485 22087 21409 21827 21172 21943 21083 21871 21208 22064 21313 22256 21723 22596 21783 22717 21799 22559 21771 22403 21607 22062 21184 21948 21461 21976 21540 22297 21585 22350 21377 22330 21251 22080 21286 21985 21113 21992 21343 22294 21673 22556 21813 22601 21814 22322 21525 21992 21307 21768 21431 21848 21273 21982 21504 22253 21699 22128 21571 22137 21469 22065 21248 21853 21379 21710 21284 21856 21445 22231 21752 22491 22092 22624 21965 21873 21205 21508 21302 21724 21697 22250 21866 22023 21838 22115 21554 21763 21452 21481 20998 21114 20851 21437 21365 21947 21465 21937 22055 22560 22473 22835 22534 22514 21982 22107 21497 21481 20972 21234 20958 21383 21536 22065 22027 21969 21942 21634 21956 21756 21882 21310 21569 21470 21996 21792 22029 22019 22305 22124 22176 21849 21878 21473 21687 21512 22021 21800 22087 21733 21976 21483 22039 21232 21906 21410 21703 21356 22208 22005 22464 21808 22295 21441 21980 21340 21847 21315 22096 21398 22072 21504 22215 21677 22323 21613 22218 21468 22114 21420 22021 21166 21907 21081 21969 21460 22189 21753 22551 21840 22480 21741 22225 21486 21895 21288 22048 21360 22073 21229 22417 21531 22429 21526 22353 21605 22160 21475 22061 20744 22380 21515 22043 21173 21806 21089 21968 21472 22224 21595 22483 21742 22648 21806 22627 21734 22321 21684 22299 21547 21956 21346 21873 21253 22041 21522 22167 21711 22285 21592 22262 21707 22327 21497 22105 21536 22103 21405 22117 21577 22070 21152 21479 20896 21415 21251 21473 21208 21931 22002 22636 22429 22891 22596 22869 55 352 5217 7709 8815 10471 11202 12327 12323 43347 42371 29171 25280 23946 22746 22533 21977 22114 21572 21491 21120 21324 21254 21861 22082 21960 59 57 10573 13137 14439 14952 15809 15682 16044 16235 43367 31847 26256 24128 23421 22662 22891 22235 22446 21943 22384 21801 22124 21632 22082 21907 22000 0 10926 14823 16864 17167 18253 18009 18884 18619 19195 37667 27168 23966 23811 22648 23047 22341 22939 22136 22805 22016 22716 21936 22647 21911 22408 21640 7641 16311 18729 18794 19819 19494 20452 19607 20524 19848 28599 23622 23315 22054 22528 21739 22352 21455 22473 21348 21995 21217 22117 21223 22076 21514 22418 16884 20692 20570 21592 20829 21628 20878 21399 20659 34641 23393 22612 21749 22178 21600 22226 21724 22285 21719 22256 21600 22103 21559 22006 21945 22108 21546 21973 21222 21460 20907 21273 20992 21296 20896 21293 21056 21555 20837 21451 21162 21848 21780 22286 22191 22731 22493 22881 22587 22681 22551 22842 22389 22411 22032 21924 21344 21200 21691 21427 21682 21369 21788 21623 21957 21815 22098 21815 22016 21880 22011 21808 21959 21639 22007 21560 22000 21356 21888 21447 21825 21340 21673 21510 21778 21220 22080 21607 22173 21785 22472 21816 22482 21896 22308 21655 22341 21580 22064 21281 21988 21122 21917 21152 21972 21255 22008 21519 22290 21518 22225 21591 22298 21454 22196 21455 22200 21261 22241 21385 22093 21277 21845 21265 21731 21188 21749 21148 21950 21165 22126 21376 22288 21662 22100 21505 22305 21844 22478 21906 22592 21902 22492 21893 22373 21750 22263 21524 21970 21332 21928 21419 21921 21351 21849 21264 21749 21166 21440 21095 21463 21296 21868 20957 21301 21044 21258 20857 21356 20953 21329 21019 21398 21293 21596 21352 21562 21284 21559 21030 21203 21059 21309 20983 21008 21623 21443 21744 21427 21809 21440 21737 21556 21879 21656 21856 21713 21816 21489 21901 21539 21900 21418 21910 21395 21800 21504 21763 21411 21878 21375 21931 21391 21984 21545 21992 21662 22149 21658 22285 21681 22349 21682 22429 21698 22560 21785 22558 21798 22487 21760 22444 21824 22499 21890 22558 21828 22662 21780 22520 21715 22561 21760 22413 21819 22339 21839 22416 21645 22550 21376 22408 21451 22304 21169 22012 21220 21974 21179 21921 21271 21727 21171 21733 21136 21760 21099 21871 21173 22088 21390 22029 21651 22324 21415 22116 21521 21946 21495 22023 21708 22133 21742 22265 22042 22332 21911 22279 21962 22272 22016 22281 21880 22273 21774 22144 21149 21364 20986 21214 20918 21177 21049 21262 21080 21309 21153 21352 21809 21692 21999 21543 21989 21748 22043 21771 22013 21912 22219 22021 22292 22140 22338 21952 22356 22029 22273 21721 22276 21788 22087 21889 22017 21329 21735 21171 21793 21097 21811 21297 21917 21273 22176 21351 22113 21278 22103 21417 22232 21411 22295 21496 22364 21508 22202 21478 22236 21549 22212 21474 22183 21352 22124 21269 22016 21162 21953 21211 22083 21505 22203 21558 22182 21633 22299 21737 22375 21749 22449 21748 22619 21680 22579 21853 22536 21699 22430 21737 22250 21616 22236 21416 21857 21337 21777 21104 21688 21170 45 51 5202 8051 10114 10694 11938 12000 13078 12645 43296 32097 26567 24135 23576 22817 83 11278 14633 15600 16501 16675 17127 16525 16869 43367 31648 25387 23722 22531 22334 2342 13991 16133 17335 18426 19048 19313 19109 19542 43352 31016 25487 24150 23136 22881 6285 16960 18597 19367 19311 19959 19785 20658 19989 20480 28324 24608 23072 22976 22404 9264 19063 20825 20469 21091 20615 21232 20521 21335 20754 27450 23256 23308 22360 22917 22160 22839 21923 22688 21675 22025 21358 22077 21616 22097 21615 22252 21451 22336 21515 22343 21620 22369 21653 22409 21520 22016 21216 22012 21530 22374 21827 22637 21834 22754 21784 22503 21715 22492 21703 22295 21560 22186 21353 21888 21256 21787 21351 22095 21129 22033 21466 22005 21558 22189 21618 22242 21575 22217 21507 21935 21300 21473 21229 21440 21173 21927 21929 22658 22551 22926 22548 21936 21150 21366 20864 21250 20985 21592 21349 21907 21497 21829 21640 22103 22055 22179 21851 21713 21658 21500 21793 21571 22307 21940 22293 22163 22243 22018 21856 21428 21625 21600 22077 22003 21905 21655 22163 21719 21883 21584 21794 21296 21915 
21867 22264 21723 21908 21294 22061 21266 22344 21564 21550 21855 21223 22274 21963 21016 21973 21280 21481 22478 21009 21356 22086 21040 22826 21153 21869 22106 20918 22521 21586 21417 22208 20936 22387 22309 20961 21734 21825 21545 21947 21665 21435 21964 21412 22130 21833 21703 21868 21767 21417 22168 21248 21784 21702 21664 21990 21761 21367 21851 21288 22064 21709 21808 21571 21677 21863 21958 21493 22048 21389 21905 21927 21552 21592 21774 21366 21747 21756 21504 21352 21767 22062 21521 21511 21732 21776 21173 21403 21946 21992 21283 21719 21632 21763 21322 21878 21925 21953 21211 21773 21577 21790 21298 21875 21897 21935 21156 21946 21524 21717 21184 22096 21844 21849 21114 21948 21671 21815 21322 21554 21692 22215 21569 21622 21351 22087 21380 21747 21166 22165 21882 21731 21176 22008 21548 21782 21123 22112 21892 21819 21312 21940 21559 21894 21099 21937 21804 22120 21248 21725 21679 21808 21318 21614 21576 22267 21550 21583 21584 21907 21490 21520 21477 22301 21747 21592 21433 22017 21649 21573 21137 21632 21986 22407 21479 21248 21675 21969 21351 21149 21225 22661 22483 21667 3280 13668 15764 16592 16247 17976 18354 17507 17104 43328 25312 23009 21360 21591 22508 22823 21815 20903 21689 21956 21474 21016 21195 21987 21999 21442 21512 21588 21703 21329 21385 21803 21984 21957 21411 21562 21760 21682 21457 21283 21608 21935 21959 21225 21655 21644 21750 21468 21361 21801 22219 21506 21516 21639 21949 21381 21527 21126 21941 21865 21893 21265 21817 21564 21740 21312 21609 21657 22302 21597 21548 21362 21963 21431 21186 21105 21907 21816 22102 21213 21856 21657 21795 21300 21491 21492 22282 21741 21662 21316 21904 21594 21771 21333 21632 21590 22332 21464 21508 21456 22033 21536 21696 21192 21741 21793 22214 21316 21602 21561 21880 21428 21764 21188 22237 21874 22081 21285 21733 21627 21861 21352 21426 21440 22288 21729 21670 21221 21803 21609 21754 21390 21563 21819 22227 21385 21571 21481 21961 21425 21559 21093 22301 22211 22032 20977 21616 21928 21687 21315 20942 22010 22717 21687 20951 21495 22113 21467 21213 21228 22300 22471 22386 21052 21145 21849 21952 21086 21003 21188 22712 22464 21304 20864 21340 22029 21784 21257 20840 21739 22057 21905 21336 21736 21696 21776 21626 21348 21880 22268 22027 25 17705 18935 19191 19303 19200 19648 19961 20226 19514 27717 22887 22480 21769 21842 21260 21720 21909 22265 21398 21513 21675 21792 21179 21797 21271 22189 21945 21653 21376 21977 21522 22004 21127 21994 21923 22228 21360 21713 21579 21888 21348 21602 21672 22265 21492 21577 21478 21928 21387 21660 21273 22199 21863 21780 21177 22021 21434 21706 21137 22129 21798 21767 21285 22000 21483 21815 21065 22030 21808 22044 21209 21968 21467 21832 21141 22007 21804 22040 21175 21960 21545 21858 21429 21561 21696 22264 21508 21539 21488 22114 21505 21879 21256 21911 21859 22019 21232 21718 21495 21875 21424 21617 21190 22116 21923 21998 21222 21661 21531 21900 21493 21592 21060 22215 22293 22382 21248 21293 21721 22081 21390 21223 20896 21932 22504 22412 21269 21025 20951 21895 21905 21623 21248 20977 21809 22760 22312 21453 20928 21392 21909 21940 21316 21203 20997 22212 22659 22202 20951 21255 22010 21825 21626 21293 21513 21888 22164 21606 21461 21514 21835 21636 21703 21381 21569 22063 22195 21670 21505 21365 21748 21632 21634 21285 21621 21888 22176 21494 21546 21597 22077 21648 21114 21327 21767 21873 22149 21532 21522 21530 21956 17991 19907 19841 20810 20857 21014 20274 20647 20784 36387 23049 22033 21652 22321 21952 22097 21248 21929 21765 21797 21226 21924 21855 21754 21280 22038 21333 21803 21195 22160 21859 21680 21497 21998 21360 21690 21414 22357 21525 21596 21467 21947 21415 21726 21178 21800 21773 22171 21350 21644 21595 21905 21506 21817 21281 21643 21486 22326 21748 21904 21061 21777 21550 21891 21444 22080 21382 21422 21398 21831 21789 22212 21831 21975 21201 21561 21375 21919 21728 21815 21382 21329 21325 21553 21219 21621 21269 21846 21776 22272 21903 22148 21650 21787 21345 21504 21266 21895 21665 22031 21653 21819 21541 21623 21163 21303 20839 21248 21603 22475 22444 22777 22487 22040 21741 21793 21079 21088 20723 21136 21590 22162 21924 22002 21466 21399 21091 21020 21232 22040 22422 22560 22582 22678 22042 21588 20855 20953 21047 21786 22012 22069 21744 21666 21977 21551 21459 21376 21465 21500 21881 21846 22189 22084 22109 21621 21655 21435 21568 21530 21593 21648 21891 21811 21824 21697 21696 21865 21792 21504 21560 21191 21621 21607 22137 21943 22384 21879 22073 21834 21776 21512 21597 21308 21752 21508 21969 21677 21888 21491 21801 15509 20571 20561 20931 20697 21105 21010 21536 21413 21853 23976 22629 21972 22181 21436 21697 21132 21673 21426 21784 21406 22029 21639 22059 21553 21900 21441 21859 21380 21612 21136 21703 21589 22103 21859 22517 21843 22340 21934 22177 21610 21809 21223 21710 21344 22016 21612 22113 21560 21848 21442 21824 21328 22209 21392 21592 21216 21697 21561 22165 21779 22400 21777 22067 21472 21710 21248 21772 21378 21873 21520 22116 21522 21955 21405 21964 21252 21572 21188 21904 21794 22301 21889 22157 21521 21554 21239 21667 21519 22151 21636 21938 21509 21783 21239 21799 21184 21538 21469 22049 21848 22300 21972 22281 21770 22002 21597 21581 21159 21609 21453 21963 21764 22014 21715 21904 21475 20948 21344 21320 20972 21057 21101 21490 21705 22510 22419 22853 22343 22182 21349 21603 21053 21031 20877 21408 21710 22167 21909 21767 21404 21307 21274 21000 21012 21346 21559 22359 22412 22820 22376 22081 21957 21671 21093 21045 20817 21313 21548 21769 21917 21782 21843 21577 21736 21558 21643 21756 21712 21430 21404 21358 21609 21803 21947 21966 22154 22055 22142 22093 21996 21801 21714 21486 21650 21275 21495 21460 21740 21620 22055 21776 21024 21249 21527 21322 21643 21185 21476 21178 21383 24844 22005 21592 22074 21911 22172 21901 22272 21946 22224 21808 22011 21628 21761 21293 21549 21302 21794 21429 21838 21623 22023 21601 22016 21640 22067 21613 22068 21488 21885 21319 21804 21431 21934 21351 21559 21337 21730 21169 21534 21234 21667 21363 21796 21640 22133 21807 22340 21856 22248 21840 22372 21838 22125 21482 21827 21286 21701 21209 21691 21365 21895 21556 21981 21605 22122 21652 22039 21651 21941 21435 21771 21345 21921 21513 22011 21221 21697 21298 21890 21361 21796 21189 21670 21095 21639 21220 21656 21445 21865 21687 22163 21831 22199 21861 22264 21917 22282 21905 22147 21686 21869 21339 21669 21206 21677 21193 21728 21431 21808 21660 21939 21623 22048 21684 22114 21558 21808 21533 21835 21734 21741 21524 21456 20922 21243 20829 21303 21527 22144 21824 22361 22560 22768 22496 22450 21735 21540 20871 20935 20816 21167 20944 21160 21304 21916 21974 22094 22028 22144 21626 21641 21396 21336 21200 21474 21200 21095 20910 21125 21163 21863 22039 21987 22176 22473 22553 22763 22315 21865 21728 21380 21488 21353 21609 21579 21920 21808 21824 21564 21744 21602 21847 21584 21506 21454 21337 21579 21780 21856 22112 22016 22272 21987 22148 21884 21944 21813 21752 21541 21476 21385 21537 21580 22004 21675 21977 21713 21955 21431 21867 21400 22224 21500 21617 21206 21509 21424 21941 21786 22327 21844 22160 21693 21777 21267 21611 21405 21888 21647 21987 21645 22072 21685 21975 21427 21824 21555 21244 21449 21676 21282 21609 21196 21620 21245 21718 21444 22028 21904 22304 21888 22350 21908 22166 21763 21989 21383 21632 21196 21776 21449 21995 21702 22089 21558 21926 21398 21694 21414 21638 21217 21564 21214 21994 21592 22326 21888 22290 21719 21944 21395 21591 21294 21796 21571 21926 21640 22061 21676 21820 21379 21952 21390 21483 21440 22007 21868 22312 22007 22306 21876 21895 21412 21770 21462 21735 21168 21336 21056 21408 21232 21856 21765 22232 21999 22027 21540 21640 21492 21520 21052 21072 20887 21448 21649 22167 22394 22744 22535 22583 22016 21536 21346 21781 21185 21068 20817 21010 21037 21493 21517 21819 21903 22204 21946 21862 21856 21647 21673 21529 21592 21555 21574 21316 21461 21408 21562 21642 21784 21820 22085 22074 22126 22024 22213 21840 22249 21784 21898 21421 21569 21324 21461 21437 21655 21255 21621 21544 21824 21620 22113 21657 22027 21562 21875 21584 21844 21453 21291 21510 21809 21369 21822 21195 21496 21248 21778 21515 22128 21735 14392 17838 18625 18432 18738 18312 18781 18635 19052 37560 24164 22288 22336 21812 22180 21553 22025 21504 21832 21355 21888 21172 21700 21204 21574 21081 30 18619 19909 20030 20685 20205 20685 20243 20732 20041 28727 22520 22238 21376 21748 21240 21570 21376 21863 21606 21952 21602 22005 21657 21927 21602 21865 13832 19779 20117 20612 20499 20623 20343 20661 20267 20566 23793 21856 21104 21328 21166 21614 21391 21399 21504 22000 21972 21656 21479 22023 22155 22641 22568 19621 21333 21541 21162 21009 20544 20684 20532 20626 41512 22341 21497 21824 21913 22075 22041 21788 21802 21572 21652 21461 22120 21440 21791 21506 21396 21202 20387 21008 21297 21553 21848 21648 21993 21846 22091 25681 22515 22056 21876 21717 21732 21296 21527 21210 21726 21483 21864 21609 22000 21636 21905 21609 21809 21548 21831 21381 21897 21360 21497 21396 22065 21440 21911 21210 21705 21285 21880 21152 21511 21142 21477 21364 21783 21447 22145 21728 22080 21625 22205 21776 22274 21836 22222 21729 22065 21783 21921 21485 21767 21276 21732 21116 21657 21243 21701 21148 21606 21319 21940 21648 22073 21710 22080 21624 21947 21556 21823 21495 22295 21254 21705 21491 21555 21090 21597 21202 21660 21170 21702 21708 22368 22381 22570 22426 22784 22514 22666 22161 22376 21897 21784 21343 21408 20917 20818 20739 21089 21181 21506 21553 21871 21802 22112 21924 22131 21812 21751 21836 21729 21709 21572 21680 21447 21682 21587 21819 21625 21430 21352 21436 21430 21408 21213 21440 21338 21683 21531 21799 21768 22144 21928 22196 21959 22213 21945 22115 21897 22337 21813 22181 21792 22116 21643 22071 21545 21828 21479 21716 21320 21874 21360 21965 21430 21927 21479 21765 21451 21888 21344 21697 21280 21720 21230 21732 21231 21913 21389 21912 21415 22035 21619 22032 21795 22053 21683 21994 21603 22302 21895 22425 21841 22261 21901 22388 21952 22276 21845 22211 21852 22247 21896 22273 21948 22324 21888 22137 21826 22217 21888 22231 22012 22328 21994 22462 22206 22631 22333 22455 22307 22381 22230 22057 21626 22125 21943 22208 21990 22055 21962 22033 21755 21777 21588 21408 20912 21013 20929 21044 20928 20983 20859 21044 21296 21335 21394 21184 21461 21280 21356 21342 21622 21488 21665 21581 21509 21457 21808 21721 21732 21504 21800 21423 21664 21628 21775 21660 21803 21654 21956 21580 22069 21686 22040 21582 22016 21687 21928 21556 22007 21352 21936 21368 21731 21290 21693 21189 21764 21200 21598 21219 21621 21296 21878 21402 21910 21644 22109 21721 22137 21654 22232 21816 22162 21741 22336 21913 22347 21834 22323 21840 22426 21895 22213 21792 22277 21828 22119 21384 21744 21382 21722 21264 21474 21113 21538 21160 21528 21161 21472 21254 21707 21426 21772 21463 21825 21472 21822 21649 21964 21732 22133 21828 22049 21652 21802 21422 20979 20701 20993 20811 20935 20725 21016 20871 21066 20916 21161 20966 21252 21271 21687 21608 22473 22621 22753 22577 22609 22509 22368 22170 22018 22189 21998 22193 21999 21737 21607 21685 21623 21521 21408 21488 21315 21337 21148 21451 21287 21650 21379 21723 21669 21279 21504 21781 5617 17193 18137 18753 18723 19161 18993 19364 19152 19477 27136 23170 22043 22241 21614 29 18483 19746 19650 20214 19891 20315 19861 20247 19980 29277 22768 22516 21873 22251 21725 18928 20188 21163 20888 21373 21085 21526 21120 21411 31705 23410 21760 21824 21144 21649 17744 20749 20789 21760 20993 21303 21140 21537 21220 21627 23031 22343 21633 21824 21340 17754 20538 21217 21065 21575 21312 21768 21723 22042 21940 23837 22203 22288 21703 21661 21010 20982 20752 21072 20997 21529 21418 21760 21672 22044 21986 22197 21985 21913 21469 21615 21187 20995 20844 20980 21096 22070 22327 22044 22119 21997 22073 21742 21824 21553 21457 21345 21354 21317 21381 21233 21632 21479 21871 21486 21689 21529 21779 21706 21873 21712 21832 21635 21913 21481 21712 21263 21511 21239 21682 21337 21760 21469 22006 21787 22253 21832 22281 21783 22042 21512 21684 21216 21622 21324 21765 21330 21878 21408 21954 21494 22037 21605 22016 21476 21648 21177 21511 21309 21925 21797 22257 21927 22281 21667 22103 21376 21575 21097 21608 21225 21736 21448 21950 21624 21992 21485 21685 21314 21656 21440 21909 21688 22168 
37300 41301 35785 37280 40932 39385 40473 42161 33866 33396 36955 40298 41299 38360 37856 38288 40497 43043 43877 37974 41592 39536 38137 36936 39269 37306 39640 36984 43997 34087 41952 40744 37158 42605 41920 37531 35665 36375 33345 37856 34681 42304 38377 42010 40076 36746 35337 37040 35904 42066 40378 40221 36103 35160 34486 38312 35718 41712 37177 40645 39123 35488 36072 33616 34864 37045 38008 43008 39002 41984 37548 37780 33311 33667 35452 36258 40448 41831 38311 40080 40881 33696 36800 33450 35371 35662 38857 40336 38869 40847 40133 33337 36626 33152 35113 36290 38743 33463 39684 39424 39804 42434 36306 34360 34005 36544 38600 40502 39207 38896 40996 34189 36800 36872 39043 38016 34971 36457 41104 33552 34950 40780 33760 34198 41385 39666 41689 36033 39587 40312 37429 35630 39512 38680 33500 35831 38968 39561 37264 36610 40765 37909 33692 37096 38961 37782 36342 39684 40168 35761 35088 36074 41000 34533 33511 41357 33738 33848 33489 37263 42823 33105 42544 41938 36044 33828 42112 38656 34549 33584 38945 34192 38144 42805 43217 40321 35132 38019 41623 39680 40365 35159 43438 35105 22880 31213 33688 31048 38967 36266 40102 31332 36541 41366 42784 39096 41491 34234 43670 37232 36578 36764 35057 37834 42640 38016 40001 38521 38832 42338 33065 33602 35168 41041 41900 36595 38151 38092 42072 33827 35384 34796 42327 40916 34257 37856 38191 40301 34869 34375 35720 42593 41763 36468 40916 32906 32731 34280 37952 41692 33477 38896 37923 37095 37277 40365 36621 33610 35559 40730 34356 34515 41556 34377 33265 41274 38380 42437 40029 38992 37486 36385 39556 40342 36869 34652 36073 40749 43123 43176 41616 36072 34791 40797 37357 33994 35835 41184 34320 33762 41800 42795 33047 42090 38864 33139 34761 39654 35936 36006 40722 41157 34176 33432 37000 42124 35912 39632 41270 37241 39240 40815 35789 34466 36889 41369 42312 42384 41472 35707 34765 40087 36496 34176 35767 41808 33916 36440 40904 41920 33896 42640 38339 42179 33912 38640 41738 40960 38731 37590 34096 37472 35175 40928 37405 38679 35955 35132 37264 43063 39892 42938 40499 40432 41731 43721 42823 38614 39360 36945 37785 38890 37874 39707 35720 43044 41148 36198 41291 38979 36056 40330 36096 35736 38991 37416 41224 35753 34887 35656 34309 41200 37312 41493 38962 18183 32519 36234 39160 40373 38884 33712 37240 39827 32416 37720 37749 43334 36136 36609 40377 35498 37378 41452 42087 33171 34793 35856 39857 36342 40568 40769 38121 34685 41248 38468 32998 38274 39204 38562 37696 40903 41595 35464 33789 36864 41322 34176 34599 41312 43106 34050 42583 37846 41876 34948 40448 40870 37298 35929 39636 38691 42392 35520 39015 39896 36352 35904 40630 38533 43044 36814 38438 38831 36244 38867 40147 38103 42820 36788 39256 38822 36384 38720 39836 38088 33408 36688 42199 33824 34787 41196 32967 33043 42456 39848 32856 37110 40262 37691 36994 38556 40208 35552 42989 37424 42012 34459 39682 39750 37749 38682 40282 34964 33140 37162 42976 34153 38144 40912 41664 42880 40340 41047 35655 39168 41976 40541 36561 37702 43718 43073 40840 38052 37394 37360 37344 34490 39904 37591 36273 36151 41590 42854 37031 41564 37650 37794 40995 40152 37744 40664 35164 40603 37533 40417 38818 36537 34390 40791 33098 36806 40097 34292 42448 33171 36582 34256 35191 41545 33760 39152 40681 34994 32608 41409 35911 34081 34099 40570 34512 36872 40149 43140 33664 33955 39279 34455 39057 41472 36105 37009 40024 33350 32717 32894 37734 36576 36676 35782 35584 36212 37796 40456 34102 35024 39195 39376 38768 34564 41584 37992 39488 40160 37832 35857 36176 40197 37666 37157 35924 40362 38935 41365 36562 39936 40066 37120 34791 42865 38892 41491 35303 41932 42468 33394 33850 42551 38276 42240 35908 39648 36248 35953 40346 41635 34696 33969 37173 32706 36280 40509 34720 42828 42143 35975 37165 38401 35906 33451 37055 42273 39249 41771 42504 42138 36916 36208 40613 36880 38352 39926 33723 41785 37971 35415 36465 41624 41451 41515 33593 40016 34475 40375 36928 35736 40936 37748 39941 34608 36071 41265 32800 40141 37493 34690 38792 34701 36480 33282 34280 39500 41126 36312 39989 34214 43343 43430 36822 43684 39059 35964 36038 38685 38612 34897 38864 33987 39907 37685 38528 42725 42276 38997 38006 40152 38851 42908 33937 33997 35082 38776 33914 36212 37254 38336 36096 38680 39271 35702 34604 38125 33670 42368 41656 42884 43362 37536 36808 40608 39404 39904 34507 34612 42276 33693 32965 33764 34168 37078 36376 36308 35031 34855 36928 35925 32517 33233 39725 34475 34112 39875 38096 42400 37549 39296 36753 35752 32736 33929 40825 35946 32674 37878 35064 36912 42904 36533 31208 32818 32571 36810 34477 38720 37733 33042 41808 37201 39226 34876 38035 40472 42528 35332 39058 34963 41960 36166 41999 38996 34596 39047 33477 37191 42248 37203 41580 34466 38869 35380 33818 39507 37056 43963 37056 41920 38082 40330 34368 36176 40277 35558 41097 38493 34304 39481 33600 36594 42213 36563 40986 40730 41793 34113 39800 35154 33488 40028 36102 42312 36105 39130 42630 35677 39984 36007 41431 37251 32821 39448 33048 37818 42096 38327 40247 33746 39529 37291 36064 41632 37321 40245 33113 33171 40309 34917 33070 39939 34424 37591 32892 35928 40472 36489 39534 33254 42565 39072 36833 41548 38332 41389 36055 38454 34225 33773 39402 34292 42436 38416 35754 38784 35487 37143 42752 37496 41209 41216 37733 38266 39044 42901 35516 43840 43127 37496 42192 40673 41664 34344 38336 38197 36517 41728 35616 40262 37616 35944 41901 41348 40773 37744 37733 41308 33835 42135 42967 36983 42384 39480 38172 35000 38721 38304 35712 40827 33580 35680 37605 36032 36720 33743 35435 33440 34384 35767 35093 42148 42201 41888 34420 36241 37987 38265 40128 39237 40272 39717 38659 36352 35249 42872 34739 40560 43268 42791 35981 34176 38966 35830 37712 40192 33367 40928 34720 39571 42806 39975 41928 37774 38664 33940 39097 37650 40331 37594 41037 38088 40768 36334 38791 34551 35553 40835 33712 40736 36216 42188 37009 34458 38566 34042 38177 34372 39026 34443 38966 42802 37683 41219 36501 42329 38080 41664 33922 41184 35659 39445 33418 40056 34896 41478 36286 34281 39820 36641 41893 36952 41112 36723 42295 37043 39995 43008 36837 40706 35393 39981 35328 41549 37552 33431 38266 34190 39674 34624 38811 34659 37761 42455 36211 41274 37701 32952 38592 40292 35223 40662 37255 41536 36289 39765 34944 38808 34594 39973 34679 42247 37272 35148 40079 36830 40704 37158 41306 37866 41365 37519 40007 35194 37130 41440 35032 39918 35159 39770 35481 42272 36381 34675 37709 34501 38607 34997 39515 33659 36011 33248 36588 35584 35770 32890 42104 37171 40581 36166 40944 33381 39539 36424 42229 33915 36058 43426 43413 36068 33158 36211 37120 35555 39670 37088 39368 40937 37703 38256 39608 38803 39846 34573 34336 41600 41472 39975 42764 40014 39054 36987 39025 39680 37204 38888 38451 40200 43567 34104 36290 41808 37266 35399 41457 42944 41793 34427 33729 37248 36167 36289 33576 35420 33900 36741 33648 32532 42328 41589 34077 35751 36667 39474 38432 41078 38576 39984 37445 37841 36471 35778 33243 42449 41974 33393 33606 38361 35034 38200 35328 37907 42409 37409 41816 40848 43268 34524 39888 33001 41745 38055 36096 41937 36898 39961 35400 35808 40407 34470 41908 37190 34710 38276 34648 39028 35123 38258 42273 36577 33463 40402 42609 35187 40457 34368 39767 34369 40458 35557 42171 38889 37280 41411 37184 42246 37593 40269 35928 38406 41856 34360 39768 35861 42368 38824 35297 39337 33648 37508 41875 35510 41955 34628 39936 33767 40020 38594 33934 41702 37197 41329 35746 37768 41864 34276 40772 36248 33617 37501 34348 39069 35017 36432 41584 37953 41904 43192 42441 38976 37175 41613 38960 41617 37315 37397 41984 36096 42553 36002 39349 41315 38340 41844 40348 36871 35782 40842 38922 38853 33298 34157 42670 33121 38176 38385 36629 42276 34693 40197 42810 36264 33572 34099 38214 33113 41138 36215 39645 38604 35744 37596 38240 43010 33362 36404 37527 40728 38088 37051 36755 34701 34769 33019 33681 33308 33511 40772 42788 42089 33827 34264 35819 36448 39329 39330 40068 38661 40852 36712 41216 36152 37280 42282 33824 40992 42796 42744 34999 40320 34507 33105 36144 34184 39473 34784 38656 33665 37024 33664 36544 42565 41266 33078 36071 41656 36836 39976 43056 40320 36000 32957 39492 35704 29223 34598 32664 30066 33680 39464 34818 32998 37385 41240 41428 41417 41984 36520 40280 33536 38486 32668 36340 41584 37201 39577 35200 39813 33828 38492 18308 32053 36467 38067 34480 39949 34574 40024 35096 38034 38266 43954 41507 41624 35939 40288 33698 41207 37289 34137 37633 34005 38502 34737 37664 34017 36920 33536 35091 38824 33417 31856 33479 41240 34248 40428 33105 37127 36745 38729 41065 39815 34452 41812 42176 32838 38166 38146 34576 42720 38924 40250 34969 33768 33350 41091 33520 39354 37798 32512 34128 32288 33240 42157 42248 43291 36592 37488 39368 38952 36194 36231 33543 34328 42426 39864 42289 36544 32677 41512 40056 41813 37772 40781 33545 36572 34305 38355 36842 39521 36545 43876 39249 37217 35446 35456 40555 33378 39875 35752 42858 37192 34199 38244 34332 37194 34199 36160 33353 36538 41621 37505 41414 43304 42058 39262 42240 37796 40103 35424 40642 37304 39203 33080 39064 42848 41813 36320 42443 40087 35495 39016 34487 40685 35904 41058 36864 40973 35672 38999 36224 37493 43015 36193 40560 35679 39035 34745 40457 35364 39264 34226 41024 37915 34384 39125 35516 39028 34406 37920 33463 36578 43052 41799 40562 35431 42826 33772 38501 34198 39706 34819 39378 35292 35203 42042 42864 34266 42714 36416 43764 35402 40019 42528 37584 36007 41552 42032 37120 35664 34704 38516 39904 32822 33140 37111 36245 39448 37648 39949 36449 35937 36646 35472 35347 33504 34605 42360 35109 33801 36432 34368 42112 41639 42599 42537 42080 40456 42286 41570 35195 33145 36130 35685 39680 37705 40528 38295 40835 38098 39783 37431 41907 36647 40407 36112 39620 34695 39220 33483 36334 42858 35591 40960 37248 41412 38450 42340 38025 42956 36089 42518 37250 41226 35272 40369 35532 40336 35680 40464 37684 41904 37640 42216 39013 34423 38418 36248 38964 35097 38408 34171 41553 37568 42905 36913 41371 37656 42529 38019 41216 36992 40735 37064 41280 37390 41149 38153 41815 37212 40026 36577 40806 37165 41092 38912 41897 38692 43500 41106 35066 41963 43563 41933 42855 41226 39220 34505 39826 38080 40531 38562 39145 38148 38663 36066 35787 33720 41568 36773 37800 36947 38067 36843 37753 36433 38080 40687 41541 41943 39760 42746 40711 41741 41691 34584 42576 34921 33794 32708 42202 36364 35437 35444 32495 35947 42298 34808 34349 35997 34653 36269 34565 37812 33837 39056 35126 38656 33990 38176 35192 37511 33422 38568 41451 37792 41624 35792 40685 35414 39723 35802 39680 34262 40025 34505 40539 37377 41937 37685 34560 39680 35609 39968 34752 40813 36544 40045 35984 41714 37724 42226 36880 41824 36749 42851 37625 40797 36116 41222 36656 39859 41723 35787 41570 35665 40150 42777 39320 33254 39216 33137 39311 42616 40593 35543 42000 36109 42656 36693 42496 36876 34470 38003 35565 39899 36611 38812 34569 36123 42185 37833 34703 37356 35790 37095 34873 37668 36406 38424 36836 39501 37570 40232 40800 35359 34029 43250 35083 36015 33936 34224 43777 42476 40521 38584 40688 38784 40546 38882 35768 34162 34892 34331 32768 41541 42924 41327 41522 39553 42698 41093 34647 41507 35821 34740 40800 32778 35815 27680 37388 38115 34208 33756 38608 36849 40623 38595 32021 41232 40689 39129 41112 34528 18121 30260 34422 33609 39888 36643 41073 36352 40260 37536 44400 36562 43817 37376 41358 35699 36177 39736 39759 36523 41810 39008 33177 38594 42064 50072 43744 35843 36279 39158 34573 33500 34832 35312 35375 37394 41026 39328 33264 39909 34673 39239 42240 34488 36224 41315 34105 32456 39825 38583 33899 40661 35914 35553 38768 37827 37846 40804 41364 35505 34728 37552 37656 34800 38230 37719 33177 41901 35763 34717 38784 38365 40672 38440 37561 42805 34716 39645 37688 36147 37496 38778 39297 42105 39119 39989 38759 39331 35923 36277 33312 42224 41547 41728 41302 41886 40491 34291 42752 37551 42994 35376 33069 35792 35203 36982 35151 36449 34308 37382 42832 35424 40544 33156 40326 35040 41224 35745 42737 38902 36275 41336 36716 41308 36295 38797 32877 34707 39817 34503 41049 36000 41063 37392 41804 38088 43013 39060 34233 38184 42702 34606 39593 33106 40938 37840 36261 41183 37952 41366 34979 39570 41472 33992 38730 34178 40148 35713 42261 38298 34370 38247 43026 35309 40822 34739 42007 37691 35027 40072 
23139 22984 23307 23213 23206 23348 23701 22724 23660 22796 23857 23453 23040 23424 23006 23089 24208 22567 23033 23482 22603 24030 22961 23040 23809 22391 23995 23213 22969 23527 22660 23616 23807 22400 23266 23296 22592 23616 23036 23089 23068 23096 23195 23479 22820 23255 23123 23139 23426 23025 23158 23383 22811 23811 23031 23303 23144 23115 23204 23531 22753 23242 22871 23418 23184 23285 22995 23283 23021 23644 22645 23319 23001 23415 23163 23189 22924 23380 23014 23693 22623 23400 22695 23474 23214 23237 22935 23249 22980 23588 22848 23459 22729 23623 23160 23311 23088 23094 23255 23355 23079 23492 22708 23653 22908 23283 22887 23224 23030 23435 22789 23447 22598 23527 22944 23187 23043 23200 23271 23560 22873 23312 22872 23239 23362 22948 22839 23406 22836 23597 22776 22445 23059 22752 23800 22712 22741 23537 22213 23959 23186 22933 23281 22480 23733 23264 22715 23423 22371 23456 23297 23091 23665 23193 23447 22855 23571 23580 23645 22896 23513 23324 23413 22954 23275 23508 23761 23050 23221 23313 23620 23105 23148 22646 23552 24071 23799 22696 23205 23608 23342 22878 22625 40 11264 12541 13487 14630 14940 14504 14519 15497 16461 33992 26869 26048 25977 25201 24757 24064 24512 25337 24633 23602 24173 24544 23929 24064 23728 24405 24125 24147 23456 24172 23814 23852 23533 23653 24012 24233 23757 23612 23777 23888 23625 23619 23461 24238 23841 23766 23375 23924 23575 23524 23143 23976 23877 24037 23141 23727 23588 23840 23264 23425 23465 24135 23616 23616 23155 23952 23324 23859 22965 23699 23609 24099 23179 23552 23205 23906 23189 23552 23191 24038 23598 23646 23034 23762 23401 23591 22956 23494 23506 24073 23372 23585 22989 23770 23200 23731 22885 23673 23575 24021 23193 23249 23112 23788 23171 23386 22797 23858 23552 23749 22888 23572 23282 23608 22880 23437 23065 23841 23574 23554 23005 23576 23331 23479 23114 23345 23348 23863 23480 23264 23075 23607 23220 23274 22872 23604 23542 23690 22885 23365 23331 23552 22905 22865 23031 24138 23860 23079 22726 23631 23492 23414 22585 23328 24129 23941 22743 23011 23592 23352 23045 23035 22766 23939 24166 23488 22508 23343 23600 23276 23008 22685 23689 24101 24109 23107 22566 23452 23597 23133 23096 23059 23724 23287 23336 22907 23537 23217 23586 23057 22967 12268 16773 16729 17009 17431 17793 17595 17892 17724 18517 27075 26169 24777 24623 24371 24497 24055 24256 23578 24427 24135 24141 23384 23979 23662 23929 23257 23591 23693 24233 23527 23568 23446 24021 23287 23517 23060 24004 23709 23750 23040 23984 23314 23737 22970 23874 23694 23959 23027 23632 23370 23672 23287 23340 23341 24080 23204 23449 23301 23665 23293 23371 23364 23945 23093 23499 23144 23701 23150 23492 23064 23941 23414 23328 23094 23744 23076 23281 23049 23926 23247 23401 22928 23754 23122 23821 22816 23492 23515 23777 22939 23243 23269 23516 23042 23242 22977 23800 23481 23576 23011 23392 23304 23475 22592 23111 22992 23725 23564 23586 22849 23296 23312 23439 23272 22825 22631 23832 24020 23603 22545 23012 23575 23447 22958 22914 22651 23173 23810 24225 23642 22800 22596 23585 23541 23105 22630 22732 23616 24188 23970 23461 22428 23070 23560 23444 23482 22619 22821 23968 24096 23208 22915 23109 23542 23065 23099 22684 23276 23404 23645 23142 23015 23079 23394 23107 23346 22724 23300 23343 23648 23116 23061 22960 23496 22997 23335 22663 23482 23339 23617 22961 23015 23090 23420 22960 23444 22676 23456 23346 23593 715 18076 18578 19323 18976 19563 19246 20105 19937 20032 26445 25197 24401 24398 23600 23879 23467 24278 23671 23681 23273 24007 23269 23497 23441 24011 23088 23512 23273 23601 23031 23370 23513 23913 22918 23603 23240 23617 22890 23593 23438 23808 22901 23396 23168 23744 23031 23355 22845 23629 23428 23719 23094 23286 22968 23680 23092 23497 22973 23300 23073 23927 23351 23592 22870 23254 23040 23527 23176 23467 23031 23763 22801 23072 22953 23654 23412 23797 23292 23346 22817 23184 23047 23449 23247 23447 23069 23313 23016 23707 23035 23053 22716 23239 23037 23509 23365 23853 23489 23449 22941 22831 22571 22779 22805 23336 23400 23580 23149 23192 22260 22848 22546 22533 22772 22784 22933 23502 23701 24088 24106 23929 23176 22856 22472 22567 23053 23544 23501 23256 22892 23012 22749 22684 22403 22579 23049 23782 23957 24183 23785 23496 22852 22461 22544 23011 23405 23100 23352 23117 23267 22858 23189 23034 22973 22655 23224 23128 23536 23401 23630 23421 23579 23168 23200 22812 22969 22840 23175 22965 23325 23068 23392 23002 23220 22864 23068 22940 23089 22688 22949 22974 23407 23181 23667 23328 23652 23104 23373 22720 23057 22605 19193 20080 20880 20621 21096 20771 21182 20700 21220 39007 24514 23298 23529 23129 23783 23384 23973 23500 23941 23373 23889 23321 23574 22884 23269 22765 23168 22913 23535 23156 23562 22933 23383 22933 23441 22971 23426 22645 23119 22551 23229 22903 23654 23113 23714 23156 23552 22862 23248 22734 23095 22764 23253 22900 23416 23104 23472 22941 23240 22796 23443 22530 23040 22778 23354 23095 23616 23209 23829 23260 23527 22749 23244 22571 23160 22913 23509 23008 23282 22864 22605 22725 23014 22699 23182 23211 23588 23341 23574 22932 23153 22681 23000 22823 23237 23016 23401 22999 23212 22854 23029 22704 23124 22551 22918 22681 23175 23163 23598 23511 23840 23267 23175 22487 22677 22346 22603 22699 23078 23309 23552 23345 23331 22982 22969 22637 22785 22361 22449 22452 23228 22962 23480 23661 24075 23893 23662 22979 22540 22308 22446 22797 23412 23400 23397 23110 23009 22131 22820 22355 22461 22615 22591 22903 23442 23733 24013 24009 23562 23410 22988 23115 22747 22964 22656 22873 22771 23101 23009 23265 23101 23214 22967 23098 22871 23218 22622 23192 22793 22805 22631 22895 22880 23281 23058 23464 23297 23542 23121 23493 22976 18536 21149 21692 21437 21814 21803 22210 22002 22276 21848 24115 23164 23436 22914 23041 22871 23365 22908 23194 22673 22953 22734 23215 22959 23456 23190 23651 23172 23671 23121 23588 23049 23585 23140 23427 22807 23216 22598 23080 22572 23015 22592 23117 22765 23156 22811 23361 22940 23360 22948 23320 22780 23234 22727 23207 22749 23645 22721 23138 22493 23071 22600 23015 22548 23292 22848 23445 23064 23569 23244 23616 23145 23521 23000 23361 22875 23012 22669 23050 22528 22944 22578 23138 22577 23121 22676 23303 22952 23428 22929 23312 22866 23383 22907 23413 23000 23318 22848 23195 22764 23191 22713 23087 23095 23139 22848 23074 22691 22833 22528 22947 22813 23265 23022 23430 23111 23606 23157 23589 23191 23410 23143 23168 22964 23264 22647 22961 22584 22912 22628 23043 22840 23176 23000 23421 23136 23303 23016 22988 22808 22913 22647 22804 22504 22412 22272 22801 23056 23496 23537 23894 23920 24009 23901 24012 23559 23436 23022 22818 22330 22382 22341 22616 22724 22992 23030 23281 23309 23407 23175 23160 22841 22883 22839 22728 22919 22602 22505 22484 22901 22814 23300 23150 23529 23221 23462 23024 22991 22599 22817 22584 22909 22842 23079 23113 23206 22985 23002 22827 23049 22945 22861 22664 22845 22528 22848 22577 22857 22758 23213 23077 23407 23175 23493 23097 23390 22981 23133 22616 22988 22518 23054 22784 23191 22921 23355 22845 23142 22663 23136 22726 22921 22313 23072 22915 23400 23057 23564 23067 23463 22994 23444 22709 23144 22545 22883 22567 23055 22714 23211 22897 23386 22867 23348 22914 23304 22789 23120 22713 23207 22722 22976 22542 22837 22455 23040 22680 23377 23008 23592 23099 23489 23040 23277 22577 23033 22413 23055 22679 23316 22890 23351 22905 23299 22600 23222 22676 23082 22483 22912 22751 23239 23046 23589 23138 23417 22970 23221 22709 22872 22487 23081 22852 23260 22904 23104 22753 23424 22662 22849 22402 22784 22608 23096 22752 22992 22858 23463 23405 23740 23647 23840 23488 23434 22789 22554 22130 22297 22345 22848 22952 23261 23304 23365 22967 22906 22680 22680 22513 22384 22202 22581 22766 22691 22721 23217 23515 23781 23901 24020 23869 23802 23661 23289 23100 22497 22955 22576 22823 22580 22912 22740 23168 23092 23219 22957 23142 22961 22998 22775 22967 23239 23075 22935 22906 22656 22835 22385 22853 22734 23258 23079 23308 23170 23420 23069 23456 23143 23503 23118 23416 22716 23148 22576 22968 22476 22900 22449 22941 22754 23237 22857 23265 22848 23356 22872 23209 22628 23143 22643 46 10087 12805 12979 14022 14121 14987 14889 15535 15239 32166 27138 26527 25303 25413 24454 24660 23997 24269 23767 24303 23719 24297 24008 24258 23798 24208 11882 16743 16188 17600 17239 17830 17416 18048 17731 18467 27223 26405 25281 25429 24888 24983 24669 24879 24425 24643 24083 24384 23797 24211 23792 23885 23405 17984 18778 19618 19485 20135 20067 20384 20215 20463 34937 26263 25250 24996 24542 24534 24152 24255 23948 23992 23739 23919 23901 23924 23655 24125 23649 23274 19532 20341 20598 21127 21422 21991 21687 21942 22127 27748 25550 25228 24749 24480 24132 23625 23709 23420 23660 23372 23766 23577 23804 23447 23753 23676 19111 22043 22404 22231 22428 22235 22080 22213 22528 22199 24462 23307 23539 23252 23613 23492 23964 23665 24135 23621 24064 23529 23924 23335 23591 23022 23460 23032 23279 23065 23386 22912 23540 22996 23591 23040 23655 23189 23654 23170 23609 23245 23748 23335 23635 23279 23628 23099 23545 22922 23655 22927 23530 22845 23548 22969 23285 22832 23226 22851 23200 22962 23338 23085 23642 23228 23909 23472 23684 23311 23886 23503 23866 23428 23635 23122 23436 22946 23126 22816 23168 22838 23240 23024 23372 23122 23507 23229 23531 23177 23402 23133 23447 23132 23264 22892 23072 22940 22867 22541 22580 22423 22657 22458 22855 22841 23232 23249 23897 23936 24069 24039 24219 24072 23946 23768 23835 23655 23504 22872 22638 22519 22615 22923 22762 23122 22791 23173 22969 23290 23081 23345 23324 23322 23105 23348 23191 23424 23126 23359 22903 23377 23015 23144 23122 23222 22772 23367 22835 23035 22586 23160 22673 23088 22599 23089 22620 23133 22713 23200 22968 23320 22962 23331 22816 23324 22752 23264 22775 23239 22844 23296 22929 23418 23004 23408 22977 23491 22958 23525 22715 23388 22801 23317 22656 23033 22709 22954 22626 23094 22585 23124 22557 23127 22695 23215 22699 23172 22659 23104 22683 22891 22703 23019 22721 23013 22624 22903 22631 22966 22637 23112 22743 23093 22811 23105 22737 23181 22735 23057 22876 22983 22686 23401 22197 23417 22967 23040 22899 23044 22822 22930 22818 22945 22877 23033 23000 23071 23248 23482 23296 23446 23382 23434 23424 23520 23312 23068 23340 23069 23383 23056 23394 23142 23421 23104 23150 22973 23275 22992 23275 22880 23095 22791 23069 22711 23136 22805 22932 22630 23040 22758 23057 22699 23163 22762 23225 22675 23264 22806 23604 23101 23626 23155 23702 23114 23669 23172 23696 23123 23668 23096 23680 23221 23554 23117 23361 22793 23219 22637 23104 22512 23040 22471 23031 22404 22913 22442 23007 22580 23119 22496 23141 22776 23085 22880 23289 22674 23316 22947 23223 22784 23258 22831 23191 22842 23225 23020 23319 22988 23354 23007 23399 23093 23228 22790 23068 22816 22956 22611 22934 22617 22797 22711 22975 22905 23215 23269 23710 23787 24065 23584 23854 23747 23664 23691 23689 23552 23668 23433 23443 23274 23394 23072 22972 22647 22637 22301 22485 22585 22848 22805 22805 23015 22753 23044 23184 22455 22509 23053 22883 23086 22976 23139 22983 23122 22941 23341 23035 23369 22976 23336 22904 23223 22854 23064 22760 23014 22677 7598 11667 13350 13475 14173 13957 14671 14325 15079 43637 28312 26178 26045 25088 25462 13033 17553 17531 18435 18078 18734 18432 18788 18311 18775 27740 26405 25056 25073 24324 12373 18544 19732 19433 20145 20189 20449 19928 20481 20052 27570 25453 25398 24672 25024 24386 21064 21207 21809 21332 21731 21195 21683 21434 21896 27463 25394 24656 24803 24438 24642 22183 23000 22707 22965 22486 22706 22282 22525 22260 22632 24134 24020 23751 23953 23789 24199 24104 24199 24103 23642 23195 23040 22851 23056 23209 23431 23528 24122 24202 24437 24464 24583 24343 24304 23946 23715 22823 23035 23360 23237 23618 23288 23519 23371 23580 23468 23688 23534 23733 23543 23733 23429 23575 23142 23500 23068 23279 22925 23424 23067 23603 23426 23858 23485 23990 23575 23888 23506 23829 23292 23568 23049 23425 22809 23207 22766 23497 22904 23515 23061 23564 23205 23637 23147 23496 23040 23307 22717 23319 22807 23497 23127 23685 23272 23882 23430 23815 23425 23485 22921 23154 22743 23364 23180 23505 22881 23529 23119 23629 23088 23432 22845 23174 22889 23256 23379 23842 23431 23631 23104 23358 22865 23091 22799 
22280 22937 22407 22673 22507 22891 21751 22837 22025 22904 22560 22503 22176 22874 22055 23317 21798 22113 22287 22421 22405 22792 21938 22811 21801 23224 22220 22666 22201 22650 22131 23313 21601 22921 22256 22624 22590 22718 22032 22933 21889 23087 22349 22422 22008 22773 21812 23327 21997 22565 22323 22491 22657 22884 22136 22907 21875 23040 22622 22449 22209 22695 22118 23061 21678 22785 22016 22932 22560 22071 22259 22666 22196 23416 21543 22887 21911 22606 22920 21656 22535 21847 22474 23327 21291 22851 22065 22537 22969 21686 22487 21819 22590 23204 21369 22837 21525 23256 22423 22289 22711 21914 22781 22375 22354 22299 22224 22544 22646 22049 22537 22088 22656 22427 22322 22339 22501 22339 22916 21844 22411 22160 22520 22650 22359 21988 22867 21709 23223 22072 22493 22240 22376 22469 22528 21847 22793 21719 23112 22241 22575 22169 22632 22222 22851 21866 22723 21883 22801 22315 22395 21975 22713 22055 23032 21748 22921 21799 22820 22325 22307 22040 22630 21869 23116 21777 22709 22123 22409 22523 22660 21808 23011 21624 22898 22224 22549 22141 22331 22294 22873 22001 22873 21891 22875 22402 83 3476 5664 7896 8703 9877 10765 43654 43697 38501 33620 31947 29106 28512 26637 27095 26083 26192 24615 25413 24450 24815 23817 24375 23981 24873 23559 23888 23343 24196 23141 23719 22739 23991 23417 23847 22513 23595 23003 23439 22616 23178 23023 23830 22511 23229 22792 23316 22784 22721 22661 23764 22796 22912 22203 23214 22603 23493 22041 22822 22929 23639 22231 22379 22684 23170 22365 22158 22072 23747 23415 23208 21600 22519 23020 22530 22104 22332 23255 24018 22474 21873 22272 23248 22276 22290 21773 22740 23421 23769 22114 21922 22674 22880 22178 21850 21900 23247 23069 22450 22423 22223 22890 22285 22575 21946 22788 22897 22863 22277 22340 22646 22697 22266 22426 22140 22876 22709 22717 21888 22647 22450 22625 22129 22310 22198 23027 22679 22570 22000 22779 22119 22796 21882 22740 22564 23042 21912 22538 22306 22612 22391 22352 22009 23124 22469 22698 21881 23010 22156 23181 21607 22807 22536 23101 21745 22663 22351 22924 22053 22528 21729 23083 22609 22904 21718 22701 22210 22776 21752 22528 21888 23145 22488 22681 21799 22820 22140 22649 21923 22737 22396 23221 22009 22642 22021 22996 22011 22768 121 1413 6295 9619 10229 12753 13169 14484 14453 43623 43533 36650 32194 29928 27434 27128 26084 25825 24542 24800 24400 24990 23864 24018 23283 24183 23197 23657 22694 23792 23753 23746 22397 23388 23303 23287 22625 22407 23257 24361 22784 22145 22834 23353 22279 21949 22643 23972 23584 22317 21885 23314 22598 22697 21668 23311 23700 22709 21607 23100 22517 22411 21654 23307 23708 23275 21489 22622 23033 22468 22435 22359 23197 22505 22433 22444 22775 22450 22449 22498 23040 22880 22582 22229 22704 22511 22695 22011 22618 22833 23101 22343 22309 22359 22768 22135 22453 22179 22763 22689 23040 22040 22475 22294 22859 22090 22465 21937 22944 22743 22839 21898 22473 22337 22916 22071 22571 21771 23239 22544 22856 21719 22602 22176 22947 22008 22784 21709 22440 22284 23222 22369 22647 21783 22762 22286 22611 21837 22463 22260 23094 22459 22999 21699 22720 22122 22841 21954 22483 21847 23077 22572 22885 21851 22438 22166 22848 22183 22581 21776 23162 22469 22917 21580 22647 22214 22710 21920 22419 21627 22912 22572 22883 21765 22503 22264 22658 22119 22349 22198 23129 22520 22824 21816 22570 22332 22761 22117 22272 22150 23139 131 5860 10222 13222 14443 15918 15710 16476 17431 18923 40875 32938 29141 28172 26217 25575 24080 24124 25137 25077 22775 23503 23719 23174 22209 24140 23943 23065 21917 23452 22872 22618 21965 24005 23424 22204 22227 23425 22383 22235 21987 23803 23408 22364 21494 22208 22861 22878 22248 21905 22599 23008 23237 22500 22423 22213 22863 22530 22579 22372 22182 22380 22849 22967 22967 22408 22325 22039 22649 22280 22833 22439 22656 22342 22497 21863 22553 22496 23140 22728 22898 22229 22261 21808 22507 22166 22606 22298 22819 22200 22684 22072 23045 22132 22413 21680 22521 22195 23034 22606 23235 22294 22853 22083 22426 21805 22505 21987 22871 22245 22968 22006 22776 21745 22601 21816 22599 21704 22424 21880 22905 22437 23168 22603 22994 22001 22530 21824 22791 22245 22937 22123 22866 21869 23096 21752 22320 21677 22677 22210 23223 22548 23097 22240 22747 21801 22363 21931 22679 22000 22794 22084 22953 21827 22656 22124 22528 21605 22462 21830 22828 22177 23095 22457 23305 22344 23000 22009 22600 21665 22387 21675 22627 22151 22828 22297 22701 22096 22624 22053 22575 21655 22325 21799 22492 22234 22973 22468 23192 22491 22955 22171 9412 13342 16033 16579 18117 18211 19281 19291 19899 37856 30769 27211 25964 24293 23765 22944 23184 23183 23608 22921 23619 23816 24379 23904 23902 23311 23068 22060 21953 21717 22528 22704 23255 22913 22969 22760 22831 22392 22632 22103 22310 21488 21812 21815 22903 23195 23670 23589 23846 23214 22968 22048 22299 22247 22047 22256 22123 22752 22504 22737 22377 22455 22080 22291 21927 22222 22070 22528 22540 22746 22960 22874 22754 22571 22335 22236 22071 22445 22418 22724 22418 22589 22173 22501 21845 22247 22080 22762 22612 23087 22632 22817 22186 22450 21971 22147 22023 22743 22323 22885 22090 22634 22033 22605 21805 22288 21773 22368 21956 22738 22453 23249 22430 23008 22339 22923 21972 22398 21707 22405 21841 22788 22011 22920 22095 22785 21910 22619 22145 22472 21676 22303 21671 22395 22162 23072 22479 23159 22363 22761 21835 22488 21582 22483 21921 22835 22101 22816 21920 22680 22120 22772 21776 22345 21568 22467 21961 22944 22372 23072 22597 23045 22235 22876 22320 22933 21693 22499 21552 22468 21923 22811 22004 23012 22055 22794 22141 22776 21782 22736 21909 22656 21824 22181 21714 22337 21841 22767 22265 23117 22483 14520 17449 19434 19335 20189 19822 20408 20128 20920 20532 27964 25088 24604 23547 23800 22976 23419 22621 23020 22368 23296 22285 22519 21843 22295 21911 22486 22025 22843 22569 23419 22733 23474 23125 23596 23389 23731 23319 23379 22561 22748 22067 22097 21586 22024 21479 21744 21283 21852 21734 22311 22256 22439 22505 22952 22608 22839 22284 22458 21928 22460 21981 22401 21813 21964 21417 21577 21354 21859 21803 22544 22566 23259 23143 23211 22977 22736 22926 22653 22868 22376 22624 22198 22377 22025 22234 21859 22065 21927 22049 22049 22078 22112 22112 22062 22328 22141 22622 22415 22560 22437 22589 22421 22676 22199 22649 22087 22345 21981 22427 21953 22173 21983 22090 21656 22267 21905 22455 22328 22839 22387 23058 22685 23092 22447 23149 22528 22785 22154 22579 21729 22298 21806 22388 21817 22549 22065 22816 22203 22941 22157 22801 21937 22624 21906 22495 21681 22332 21504 22265 21872 22686 21953 22701 22340 23035 22456 23001 22563 23069 22243 22721 21777 22395 21616 22447 21699 22548 21842 22924 22048 22882 22269 22872 22127 22716 21953 22765 22423 22451 21793 22391 21731 22631 22056 23086 22344 23273 22376 22937 22221 22689 21734 22427 21607 22545 21914 22836 22082 22880 21993 22745 21947 22570 21353 22481 21830 22678 21695 22325 21601 22439 22197 22846 22350 23090 22519 23113 22473 22859 22113 22439 21748 22318 21768 22459 22058 22625 22214 22804 22224 22534 22113 22064 21381 21763 21824 22664 22929 22935 22770 23552 23333 23746 23121 22932 22123 22081 21358 21578 21184 21760 21185 21841 21541 22305 22292 22912 22668 22765 22247 22518 22086 22603 21750 22113 21789 21637 21416 21974 21976 22711 22788 22671 22987 22535 22579 21975 22161 21948 22248 21986 22137 22364 22609 22426 22446 22329 22379 21960 22232 21811 22022 22240 22696 22563 23017 22689 22921 22483 22747 21973 22165 21863 22538 22316 22907 22011 22662 21991 22511 21874 22517 21904 22381 21725 22265 21745 22214 21846 22573 22249 23014 22442 23085 22420 23013 22006 22552 21733 22420 21590 22536 22036 22844 22184 22818 22172 22555 21929 22092 21728 22389 21672 22701 21499 22436 21604 22653 22037 22969 22391 23061 22487 23219 22457 23019 22274 22912 22043 22541 21702 22365 21628 22407 21839 22761 22120 22887 22041 23005 22080 22792 22009 22640 22031 22515 21240 22423 21841 22291 21669 22216 21877 22685 21623 22313 22208 22904 22320 23015 22533 23177 22446 23124 22564 23006 22263 22305 21607 21879 21429 21735 21256 21762 21818 22440 22327 22849 22656 113 85 512 3216 6371 7422 8920 10055 11245 12073 43681 43249 38040 33968 31859 30113 29016 27756 27031 25893 25380 24539 23977 24231 24034 24247 23926 120 2597 8232 10893 12874 13966 15092 15463 16395 43575 43603 36416 32240 29461 28189 26983 26695 25900 25920 25355 25480 24823 25261 24612 24713 24130 24424 3896 10500 13108 15320 15890 17303 17312 18413 18199 43657 35347 31467 28496 27566 26114 26168 24922 25321 24267 24986 24001 24525 23824 24269 23601 23883 3440 12303 15170 17529 17655 18885 18707 19760 19056 20311 35040 30349 27317 26922 25431 25655 24597 24960 23952 24525 23367 23872 22835 23628 22704 23315 22689 14667 17456 19874 19925 21099 20679 21433 20922 21627 20960 28299 25416 25040 23972 24114 23055 23468 22759 23393 23045 23661 23203 23858 23265 23859 23285 23808 23351 23681 22949 23264 22674 22839 22151 22439 21911 22151 21636 22080 21929 22118 21666 22004 21578 22244 22313 22947 22797 23265 23005 23322 22889 23210 22857 23000 22572 22584 22298 22447 22624 22277 22652 22200 22407 22092 22279 22280 22294 22099 22349 22435 22638 22601 22968 22829 23127 22795 23266 22817 23025 22415 22753 22396 22425 22095 22578 21885 22368 22120 22585 22226 22836 22372 22963 22278 22946 22141 22785 22124 22809 22004 22808 22017 22620 22016 22602 21966 22539 21798 22550 21952 22800 22242 23095 22502 23233 22504 23313 22503 23342 22505 23164 22480 22980 22160 22740 22087 22556 21810 22720 21671 22592 21736 22602 21747 22508 21833 22633 22037 22784 22324 22964 22379 22976 22173 22770 22152 22707 22044 22635 22138 22723 22040 22635 22130 23063 22045 22301 22005 22354 21591 21902 21330 21927 21643 21994 21696 22200 21665 22018 21650 22123 21421 21787 21392 21543 21232 21562 21351 21591 21811 22144 21753 22072 22071 22310 22813 22411 22641 21981 22481 22279 22320 22249 22359 22277 22400 22208 22390 22167 22397 22241 22474 22112 22472 22135 22393 22168 22421 22163 22507 22045 22473 22113 22555 22135 22576 22216 22625 22221 22711 22183 22879 22102 22932 22096 22926 22179 22855 22138 22858 22218 22880 22265 22855 22209 22968 22209 22725 21902 22759 21895 22571 22021 22552 21975 22509 21957 22620 21792 22683 21631 22548 21600 22500 21660 22455 21713 22461 21597 22376 21817 22562 21973 22585 21977 22493 22291 22989 22400 23152 22498 23141 22554 23144 22691 23127 22555 23129 22728 23114 22551 22961 22487 22701 22193 22457 22148 22197 21687 22016 21675 22007 21610 21696 21281 21809 21691 22002 21749 22433 22136 22305 21876 22572 21950 22281 21952 22106 22391 22134 22386 22137 22540 22256 22507 22397 22528 22422 22415 22318 22581 22368 22559 22265 22472 22039 22512 21969 22395 22026 22312 22016 22199 21984 22428 21953 22462 22045 22781 22279 22893 22454 23173 22412 23223 22407 23153 22316 22987 21928 22505 21653 22448 21627 22334 21573 22385 21668 22259 21581 22393 21543 22397 21667 22612 21843 22648 21760 22738 22026 22737 22096 22653 22117 22822 22049 22748 22128 22919 22034 22913 22097 22785 22103 22814 21991 22611 21861 22375 21740 22375 21651 22272 21785 22389 21956 22607 22084 97 86 2429 5392 8305 9452 11313 11700 13132 43640 43682 40965 36114 32334 30449 139 7095 11133 13653 14457 15851 16018 16449 16480 43640 43725 37523 32976 30337 28865 972 10428 14683 16258 17869 18599 19398 19665 19602 20172 41602 34528 30701 28680 27258 7568 13563 17091 18612 19702 20150 20992 20953 21600 21361 37468 31055 28937 26968 26376 25228 18098 19673 20958 20855 21753 21412 22272 21720 22277 31040 28072 25997 25780 24659 24825 23951 24357 23424 24040 23109 23894 23316 24046 23568 24251 23495 24192 23242 24082 23139 23778 22789 23291 22371 23052 22264 23591 22565 23159 22615 23382 22724 23481 22605 23426 22451 23114 22327 22959 22158 22738 22184 22776 22277 23088 22502 23369 22807 23523 22983 23491 22769 23366 22681 23275 22158 22663 21954 22400 21868 22381 21937 22834 22587 22596 22251 22866 22885 23166 22701 22951 21915 21916 21513 21925 22071 22887 22961 23543 23507 23853 23488 23680 23185 22807 21817 21992 21536 22364 22429 22304 22688 22324 22781 22535 22762 22453 22409 22097 22294 22336 22701 22760 23147 22809 22898 22311 22691 21872 22375 22083 22765 22453 22672 
