# Supplementary material for: An Active Feature Selection Strategy for DWT in Artificial Taste
Source: Hindawi journal article supplement (doi:10.1155/2018/9709505), 2018-01-01
Supplement: f1 [file 9709505.f1.zip › blackTea-low-1.txt]

38471 37074 34210 32901 0 8259 15336 16109 18090 18951 20657 20932 20955 20681 21764 21705 21936 21366 22003 22089 22017 21539 21872 22145 22785 21499 22054 22053 22656 22384 22379 21908 22931 22042 22503 21830 22695 22588 22641 21879 22387 22350 23156 22154 22412 22052 23058 22448 22816 22016 22976 22323 22984 22100 22822 22722 22904 22461 22708 22118 23296 22147 22853 21840 23049 22638 22915 21935 22616 22104 23317 22181 22998 22081 22706 22472 23170 22620 22939 22002 22721 22487 23367 22055 22612 21923 22912 22631 23161 22414 22869 22070 22912 22557 23309 22183 22616 22216 23111 22594 22772 22129 22702 22093 22942 22536 23299 22096 22585 22021 23246 22652 22847 21962 22700 22349 23332 22067 22646 22020 23161 22710 22788 21980 22544 22593 23376 22280 22634 22062 23096 22763 22676 22104 22726 22595 23400 22322 22618 22107 23077 22763 22829 22094 23069 22493 22876 22157 22616 22705 22823 22354 22272 22712 23636 22117 22035 22416 23149 22667 22200 21657 23488 22728 22489 21556 23183 23856 22584 21376 22762 22983 22845 22000 22480 23783 22307 21468 22679 22959 22515 21831 23168 23816 10497 14568 19569 18743 18493 19749 21078 20234 19877 21400 29894 25724 24552 24646 23467 23341 23414 23368 23056 22904 23004 23503 22802 22871 23220 22893 22310 22967 22689 22736 22446 23090 22695 22562 22816 23125 22221 23253 22791 22758 22742 23341 22492 22987 22912 22812 22616 23344 22744 22821 22824 22769 22327 23520 22106 23193 22696 22620 22567 23197 22152 23108 22633 22855 22398 23417 22209 23170 22624 22793 22532 23249 21996 23166 22671 22779 22436 23351 22164 23150 22796 22948 22504 23220 21952 23209 22434 22688 22532 23165 22074 23356 22305 22868 22549 23217 22075 23087 22669 22512 22686 23228 22309 23118 22615 22842 22409 23312 21960 23304 22545 22817 22553 23095 22048 23130 22327 22784 22533 22706 22249 22966 22211 22965 22441 22516 22343 23042 22215 22839 22537 22656 22643 22789 22029 23218 22330 22505 22722 22745 22048 23264 22337 22209 23368 22661 22438 23834 22172 23081 23278 22174 23032 23533 21812 23388 23296 21931 23175 23489 21756 23251 23072 21992 23213 22666 21752 23330 22295 21956 23170 22478 21585 23412 23181 21849 23276 22976 21836 22816 22848 22183 23091 22496 22505 22577 22586 22451 22932 22496 22598 22651 17446 19266 20596 20367 21376 21120 21304 21741 21770 30258 26385 23873 24137 23618 23529 23040 23584 22377 23435 22778 22844 22612 22849 22563 22855 22097 23416 22345 22842 22960 22952 22145 23494 22264 22944 22682 22856 22543 23368 22002 23279 22178 22977 22291 22691 22739 22812 21992 23428 22327 23081 22567 22857 22498 22872 22201 22933 21959 23458 22167 22874 22762 22709 22582 23031 22092 22889 22105 23329 22217 22987 22682 22798 22444 22763 22304 23027 22004 23330 22095 23016 22250 23130 22241 22890 22709 22624 22442 22514 22854 22670 22657 22858 22326 22688 22199 23344 22280 23001 22136 23097 22165 22641 23015 22448 22603 22970 21863 22775 21577 23957 22029 23160 22905 22177 22683 21578 23602 22123 22497 23269 21880 23380 22422 22215 22744 21607 23661 22301 22827 23277 21760 22882 21383 23401 22126 22090 23680 22289 22700 23533 21968 22722 22571 22708 22784 22222 23180 22254 23072 22521 22474 22592 22502 22777 22722 22310 23178 22130 22956 22364 22833 22438 22597 22762 22607 22642 22762 22485 22706 22182 23303 22180 23175 22204 22908 22124 22784 22684 22769 22621 22994 22028 22886 21909 23338 22060 23208 22257 23156 22094 17339 20098 21283 21370 21962 21458 22085 21435 22688 21415 26328 23526 24010 22830 23061 22957 23032 22573 23255 22118 23240 22053 23267 22298 22931 22784 22658 22530 22708 22436 23062 22172 23464 21888 23192 22020 23268 22278 22816 22696 22701 22549 22615 22531 22700 22192 23379 22487 22933 22772 22583 22571 22619 22383 22832 22151 23160 22296 23054 22734 22541 22695 22553 22375 22621 21864 23836 22116 23111 23040 21858 23128 21888 22902 22288 21754 23974 22196 22788 23191 21880 23208 21846 22757 22407 21589 23857 22208 22765 23580 21819 23143 22424 22165 22433 21451 23727 22354 22495 23136 22224 23124 22359 22727 22364 22522 22568 22680 22265 23202 22464 22917 22689 22469 22624 22608 22542 22760 22008 23298 22204 22897 22690 22729 22713 23004 21964 22919 21993 23220 22221 22716 22701 22668 22416 23190 21992 23075 22203 22723 22341 22587 22472 22859 22012 23329 22044 23037 22509 22691 22481 22796 22337 22796 21947 23335 22228 22947 22600 22904 22438 23245 21900 23207 22038 22869 22233 22661 22665 22773 22256 23244 22204 22976 22469 22663 22423 22949 22152 22937 22004 23312 22141 22715 22720 22760 22290 23325 22216 23015 22667 22573 20669 21697 21517 22104 21536 22753 21806 22204 22336 26363 23425 23875 22450 23337 22967 22480 22897 23020 21756 23096 21912 22059 22940 21924 22417 22557 21357 23734 22166 22249 23794 22213 22893 23696 22044 22835 23492 21910 23201 22726 21741 23345 21977 22125 22806 21782 21821 23254 21698 22680 22688 22103 23020 22236 22472 22808 22662 22057 23058 22356 22451 22988 22672 22173 23119 22275 22566 22688 22657 22021 23159 22232 22561 22829 22784 22439 23340 22042 22957 22481 22564 22573 23005 22156 23044 22120 22711 22226 22535 22498 22864 21936 23444 22116 22729 22642 23233 22136 23328 22044 22968 22538 22701 22518 23100 21889 23095 22020 22705 22373 22728 22259 23127 22114 22876 22276 22817 22238 22948 21947 23116 22255 22613 22546 22842 21841 23036 22151 22478 22689 22799 22017 23266 22089 22816 22754 22800 22184 23267 22439 22662 22757 22800 22131 23168 22656 22692 22776 22709 22417 23248 21689 22697 22841 22584 22299 23512 22164 22914 23378 22129 22564 24038 22064 22189 23687 22186 22372 23841 22004 23056 23521 22063 22792 23623 22021 22965 23344 21912 22967 23462 21867 22921 23482 22151 22855 23545 21884 23057 22990 22124 21272 22152 22365 22135 22872 22219 22452 22721 22423 22259 23927 21989 22656 22958 22722 22190 23177 22359 22572 22379 22889 22209 22705 22643 22868 22083 23094 22376 22518 22617 23296 22192 22897 22681 22536 22275 23316 22592 22661 22605 22812 22092 23402 22543 22889 22641 22839 21885 23409 22220 22689 22658 22785 22011 23280 22203 22596 22528 22934 21904 22980 22332 22720 22285 23047 21973 22977 22433 22674 22258 23050 22081 22900 22252 22736 21899 23150 22241 22713 22322 22607 22260 22862 22030 22812 22293 22528 22493 22753 21988 22939 22313 22371 22552 22620 21997 22932 22411 22410 22494 22890 22212 22528 22477 22220 21965 22891 21579 22487 22866 21787 22314 22764 22368 21870 23143 22294 21612 23271 22466 21871 23023 22383 21824 23116 22641 21786 23153 22476 21655 23337 22327 21639 22961 22287 22753 22298 22487 22356 22856 22164 22703 22450 22376 22544 22592 22045 23138 22275 22487 22775 22688 22259 23224 22171 22457 22839 22670 22019 23197 22695 22835 22679 22695 22384 23127 22052 23057 22576 22737 22436 23255 22030 22912 22666 22675 22216 23360 22013 22924 22601 22624 22235 23356 22701 22796 22676 22996 22145 23360 22072 22913 22725 22858 22302 23369 22196 22949 22604 22694 22183 23243 22275 22903 22569 22820 22240 23224 22026 23080 22551 22569 22540 23032 21917 23003 22260 22545 22445 22823 22092 22871 22251 22629 22404 22525 22352 22824 22003 22700 22400 22598 22160 22784 22041 22857 22381 21980 22407 22519 21415 23504 22404 21699 22661 22460 21312 22912 22340 21544 23014 22423 21316 23114 22389 21552 22861 22469 21706 22139 22839 21955 21964 23200 22988 22203 23008 22340 22532 22604 22630 22227 22919 22064 22505 22696 22613 22242 22860 22227 22508 22420 22624 22249 22915 22012 22951 22331 22412 22472 22791 21949 22877 22174 22624 22714 22762 21925 23113 22173 22534 22621 22794 22057 23367 22472 22850 22631 22758 22125 23242 22060 22683 22704 22688 22024 23312 22131 22634 22622 23062 22028 23376 22162 23018 22666 22754 21970 23336 22219 22482 22616 22818 21913 23370 22071 22733 22512 22912 21843 23224 22149 22461 22487 22672 21990 23008 22343 22439 22511 22591 21931 23017 22242 22468 22489 22641 21927 22413 22487 22590 21712 23015 22485 21990 22939 22892 21672 23319 23017 21856 22720 23716 22021 22961 23431 22080 22618 23538 22087 22946 23532 22188 22156 23904 21497 22097 23800 22232 22519 22738 22660 22395 23126 22128 22937 22840 22552 22741 22896 22131 22965 22499 22528 22501 22788 22073 23047 22395 22472 14287 18531 19071 20459 19941 20594 20551 21286 20308 36377 27195 25044 24036 24229 22791 23552 22998 23186 22528 23632 22451 23248 22728 22904 22102 23350 22273 17732 20001 20909 20459 22029 21009 21504 21459 22052 30004 25769 24030 23971 22839 23395 23033 23092 22483 23594 22699 22932 22759 22985 22048 23309 22551 13562 19074 21454 21385 21689 21762 22405 21495 22279 22156 27194 23887 24075 22957 22933 22442 23277 22654 22626 22609 23480 22790 22168 23136 22661 21568 22712 18575 20952 20665 22809 22122 21421 22120 23413 21908 21981 25946 23156 21773 23053 22877 22364 21879 23554 23484 22134 22421 23914 21671 21555 23123 22519 22497 20679 22288 21946 22172 22375 22614 21893 22682 22617 22289 23219 23603 22539 22593 22533 23040 22257 22544 22633 23084 22249 22839 22802 22801 21972 22929 22454 22721 21953 23047 22391 22668 22480 23315 21930 22733 22610 22919 21928 22864 22474 23281 22064 22830 22689 22699 21914 23088 22325 22754 21960 23169 22458 22838 21960 23360 22161 22619 22028 23048 22274 22670 22561 23195 22056 22884 22692 22838 21767 23068 22248 22720 21994 23078 22322 22581 22467 23210 22306 22821 22711 22857 21881 22941 22434 22821 22027 23042 22660 22647 22308 23285 22151 22347 22304 22868 22364 22041 22750 23816 21864 21948 23322 22502 21261 22296 22984 22507 21600 23243 23690 22320 21343 22941 22669 21975 21569 23280 23707 22049 21384 23085 22844 22141 21688 22504 23851 22231 22326 22639 22727 21943 22534 22567 22717 22199 22628 22945 22533 22081 22852 22473 22465 22068 23020 22629 22864 22441 23208 22125 22440 22264 22881 22209 22436 22417 23320 22151 22472 22616 22889 22035 22561 22473 23004 22002 22762 22627 22788 21859 23162 22115 22692 22112 23079 22331 22695 22476 23213 22125 22712 22618 22909 21914 22705 22363 23043 21756 23016 22557 22617 22217 23346 22558 22452 22360 22949 22074 22562 22321 23112 21981 22936 22656 22823 21893 23051 22352 22663 22052 23024 22576 22533 22382 23220 22156 22484 22288 22959 22369 22544 22584 23127 22236 22659 22861 22577 21889 22131 22711 23379 21989 22032 23264 22338 21431 21892 23165 23252 22016 21888 22880 22817 22336 21928 22691 23864 21936 21568 23025 22615 21952 21742 22934 23858 21405 21575 21981 23253 22964 22167 22664 22881 22630 21964 22414 22737 22954 22281 22424 22624 22738 22256 22423 22305 23141 22165 22488 22021 23084 22677 22644 22061 22692 22481 23008 22221 22734 22748 22767 22119 22487 22437 23296 22028 22487 22187 23120 22388 22723 22148 23202 22057 22700 21913 23035 22545 22752 22036 23201 22183 22984 22088 22829 22594 22766 21768 22953 22302 23170 22081 22732 22615 22780 21948 22657 22415 23188 22101 22648 22550 22832 22055 22728 22351 23288 22466 22599 22539 22861 22263 22410 22435 23179 22725 22482 22629 22632 22247 22483 22362 23220 22216 22362 22033 22897 22720 22528 21959 23042 22528 23233 21879 22524 23545 22229 21210 22670 22766 22717 21633 22990 23629 22503 21308 23266 22421 21991 21700 22880 23726 22158 21239 22261 23209 23086 21927 21802 23052 22306 22528 22005 23014 22730 22584 22148 22304 22656 10401 17184 18932 19941 20558 20380 20547 20554 21546 20492 29803 25300 24712 23748 23558 22647 18436 20019 21201 20672 21769 21752 21772 21186 21731 30528 26268 23788 23809 22718 23291 18091 21036 20929 21893 21651 22684 21580 22400 21473 22388 25320 24161 22840 23164 22712 18923 20547 21824 21544 22652 22378 22437 21412 22259 22305 25715 23591 23185 22488 23454 22784 21971 21509 22423 22184 23170 22112 22543 21972 22695 24496 23439 22631 22901 22272 23175 22648 23187 22466 22538 22321 23044 22788 22689 22016 22520 22535 23380 22351 22112 21692 23136 23628 22294 21378 21835 23023 23813 21784 21621 22214 23330 23560 22279 21701 21845 22825 23936 22195 21751 21640 23232 23701 22377 21762 21772 22795 23816 22582 22045 22477 22595 23097 22295 22396 22333 22917 22704 22710 22080 22608 22595 23126 22387 22345 22092 23061 22669 23111 22000 22871 22604 22925 22240 22650 22561 23159 22557 22628 21927 22540 22501 23264 22141 22467 22132 23138 22567 22851 21883 22857 22456 23240 21947 22626 22518 23069 22501 22172 21934 22868 22491 23053 22031 22600 22456 23010 22291 22756 22033 23289 22184 23013 22091 
21512 22278 22293 22233 21874 21952 21457 21956 21655 22221 21819 22441 22125 22362 22016 22076 21473 21726 21539 22039 21885 22165 22071 22412 22088 22093 21480 21812 21341 22087 21497 22439 21785 22620 21767 22039 21478 20454 20593 20574 21121 21129 20940 20418 20887 20925 21385 20929 20697 20999 21313 21236 20915 20568 21560 20881 21357 20545 20520 21653 21309 20923 20241 21034 22455 20858 20520 20043 21336 21861 21404 21459 20596 20066 21225 21680 22129 20832 20212 20324 21718 22492 20889 20455 20398 21165 22206 21313 21817 20796 20264 20796 21893 22587 20903 20189 20679 21809 22645 21092 20759 20920 20889 21573 21273 21924 20983 21199 20903 21763 21578 21444 20892 21251 21368 21859 21184 21113 20937 21749 21701 21283 20794 21379 21447 22046 21005 21324 20865 21772 21596 21557 20844 21287 21489 22091 21091 21432 20773 21672 21568 21632 20855 21600 21250 21884 20901 21509 21463 21739 21041 21312 21316 22016 21483 21383 21136 21827 21357 21644 20800 21949 21157 21778 20843 21872 21435 21651 20741 21633 21403 21811 20819 21507 21642 21539 20879 21637 21306 21821 20825 21814 21760 21765 11655 13856 7069 9070 9474 11157 11223 11857 12199 13413 30148 28278 26740 25701 24208 24546 23517 23625 22419 23248 22857 22991 21970 23124 22118 22521 21889 22840 21978 22208 22003 22742 21644 22565 22272 22176 21890 22779 21868 22188 22348 22285 21749 22646 21090 22179 22311 22134 21499 22736 21660 21863 22284 22499 21520 22913 21736 22217 22473 22075 21772 23218 21589 21538 22959 21792 20913 23577 21528 21636 23304 21759 21283 23415 21170 22051 23106 21891 21156 23400 21531 21492 23181 21627 21416 23442 21243 22232 23093 21471 22304 23140 20928 21903 23104 21591 21625 23318 21824 21706 22634 21673 22137 22227 22295 21685 22659 21872 22181 22407 22001 21952 22557 21805 22336 22160 21879 22108 22385 21405 22329 21737 21819 21861 22132 21568 22393 21936 21997 22105 22436 21609 22339 21475 22097 21724 22053 21819 22431 21437 22403 21656 22017 21936 22280 21433 22813 21910 22179 22180 22409 21548 22830 21419 22456 22153 22154 21696 22601 21709 22311 22178 21900 21924 22627 21381 22492 22016 21916 21915 22667 21236 22511 22145 22107 21738 22733 21460 22487 21960 21852 21963 22625 21261 22595 21841 22007 21789 22548 21322 22536 5407 10377 12454 14319 14086 15671 15126 16443 15961 16411 31872 28155 26279 26112 24340 23821 23687 23129 22694 23459 22237 22993 22453 22292 22158 22407 21792 22557 21522 22594 21725 21607 21990 22176 20910 23177 21405 21463 23196 21573 22032 23108 20984 22848 21440 21972 21728 21242 22039 21783 20983 23308 21606 22103 22862 21143 22490 21913 21278 22157 20909 22933 21559 21553 23296 21319 22359 21863 21968 21868 21915 22219 22326 21849 22562 21626 22413 21827 22184 21779 21979 22375 21736 21920 21789 22254 21973 22101 22110 21681 22045 21731 22683 21383 22461 21574 22704 21881 22323 22004 21920 21769 22064 22016 21959 21762 22752 21481 22581 21623 22369 21554 22116 22081 21987 21799 22327 21696 22353 21388 22756 21424 22178 22125 21848 21901 22328 21864 22181 21360 22819 21469 22485 21585 22324 21477 21884 22081 21892 21513 22881 21459 22368 21993 22004 21689 22122 22009 22462 21648 22615 21281 22469 21867 22039 21677 21984 21841 22129 21735 22737 21465 22576 21515 22551 21695 22208 22231 21986 21985 21880 22051 22125 21669 22632 21465 22404 21395 22681 21705 22096 22404 21691 22107 21968 21669 21771 21328 23095 20903 22568 20620 13416 14279 15865 18087 16892 18509 17735 19185 18679 18555 29293 25063 25264 23381 23353 22454 21889 23851 21811 22742 22739 21437 22389 20845 22921 22187 22027 22478 21575 22373 21617 22445 21347 22197 22278 21768 21970 21826 22343 22137 21894 22454 21431 22257 21422 22433 21673 21892 22263 22112 22013 22528 21331 22474 21700 22418 21560 22147 22236 22340 21749 22564 21408 22330 21454 22433 21639 22076 22137 22212 21842 22551 21355 22443 21248 22628 21561 22072 22192 22052 21749 22444 21517 22433 21335 22542 21544 22182 22034 22256 21773 22627 21174 22579 21401 22470 21642 21895 22016 21873 21621 22629 21393 22519 21596 22022 21780 22208 21935 22240 21332 22727 21358 22395 21888 21912 21935 22003 21946 22159 21446 22529 21586 21969 22244 22021 21968 22407 21395 22321 21337 22488 21686 22028 22299 22162 21814 22894 20932 22519 22005 21523 22131 21023 22481 21629 20696 23318 21201 22170 22627 21073 22449 21236 21972 21812 20694 23214 21449 21155 23091 21704 21732 23133 20961 22583 21465 21685 21914 20745 22480 21762 21859 22243 22001 22015 22587 21456 22265 21712 21966 21975 21735 22263 21940 21512 22548 21726 22075 22307 21927 13664 17352 17589 19444 19232 19868 19648 20058 20234 20512 26546 25715 23720 23367 22961 22682 22215 22943 21632 22760 21792 22143 21930 22473 21348 22409 21444 22466 21602 22016 22101 22201 21483 22695 21453 22032 22084 22251 21627 22645 21323 22597 21729 22000 21794 22316 21380 22480 21742 21889 21828 22167 21600 22404 21324 22342 21648 22067 21751 22252 21320 22445 21533 21879 21922 22212 21381 22488 21708 21876 21779 22126 21325 22580 21644 21863 22187 22438 21795 22624 21601 22315 22138 21841 21943 22412 21149 22372 21800 21568 21964 21520 21604 22077 20700 22819 21280 20874 22642 21628 21049 23269 21309 21504 23112 21707 22033 23134 20875 22712 22253 21080 22528 22544 20939 22569 22286 21092 22505 22101 21211 22069 21879 21696 22197 21472 21840 22061 21895 21962 21952 21608 22287 21687 21751 22263 21907 21589 22455 21623 21783 22052 22072 21442 22557 21659 21815 22137 22144 21367 22713 21431 21879 22069 22126 21281 22572 21425 22013 21985 22368 21424 22761 21461 21943 21959 22248 21288 22858 21222 22130 22130 22275 21606 22755 21481 22127 22016 22231 21669 22792 21419 22211 21971 22074 21479 22666 21382 22076 21978 21914 21707 19621 20020 20636 20813 21281 20397 21802 20768 21175 25207 24078 22401 23178 21941 22053 22164 22307 21758 21957 21920 22265 21451 22329 22117 21879 21938 22641 21383 22353 22135 21589 21285 22682 21702 21427 22258 21906 20731 22529 21902 20880 22587 21709 20523 22825 21457 21063 21545 22102 20705 22007 22010 20977 21656 22080 21025 21684 21948 21320 20823 22657 21969 21169 22446 22216 21034 22091 22179 21435 22375 21875 21840 22016 22252 21495 22145 22136 21619 21989 22264 21611 22325 21790 21783 21879 22097 21319 22334 21751 22017 21911 22131 21559 22244 21387 22112 21857 22176 21549 22272 21627 21831 21917 22181 21250 22380 21442 21927 21744 22294 21255 22496 21525 21888 21803 22564 21281 22459 21941 21898 21941 22534 21216 22464 21703 22064 21596 22461 21290 22436 21971 21808 21865 22403 21299 22193 21459 22101 21725 22516 21192 22374 21510 22058 21704 21998 21693 22088 21380 22299 21708 21751 22054 22029 21384 22214 21569 21962 21828 22017 21286 22601 21544 21894 22195 21911 21399 22683 21413 22028 22838 21756 20972 23139 21820 21031 22807 21561 20736 22993 21312 21149 22892 21469 20596 22825 21312 21144 22757 21549 20640 22884 21440 20923 22871 21576 20602 23131 21735 21077 22343 21702 21713 22064 22110 21546 22513 21042 21783 22200 21898 21872 22502 21621 22258 21975 21713 21829 22410 21403 22391 22006 21565 21831 22168 21287 22371 21541 21983 21879 22376 21277 22314 21693 21941 21705 22037 21453 22325 21399 22187 21671 22181 21235 22373 21307 22198 21651 22078 21723 22312 21328 22087 21747 22073 21479 22325 21277 21967 21783 22327 21131 22417 21940 21994 21760 22465 21175 22433 21847 21943 21694 22327 21240 22509 21777 21871 21767 22435 21248 22423 21986 21729 21860 22231 21280 22292 21556 21860 21866 22085 21544 22205 21277 22092 21809 22089 21368 21979 21399 22272 21705 21083 22284 21689 20484 22832 21409 20811 22857 21652 20592 22284 21765 21091 21852 21935 20556 22340 21494 20879 22281 21581 20765 23211 21409 20811 22400 21668 21705 22061 22105 21328 22235 21623 21585 22082 22087 21620 22039 21880 21797 21662 22232 21543 21803 21920 22159 21437 22213 21523 22168 21782 22004 21523 22246 21643 21779 21914 22416 21288 22436 21797 21963 21799 22586 21257 22424 21383 21496 20951 22076 21077 21509 21569 21410 21046 22135 21040 21474 21600 21570 21097 22048 21141 21390 21493 21573 20837 22029 21270 21364 21753 21761 20955 22261 21009 21660 21696 21520 21275 22021 20865 21725 21599 21248 21348 21881 21046 21685 4592 9119 10979 12617 12199 13687 13799 14134 14064 36075 30268 27908 26941 25056 23621 25113 22896 22236 23648 22320 21351 23576 21585 21340 22258 22181 3575 10031 13127 13820 15433 16464 16003 16453 17575 17583 31879 29590 27404 24792 24075 23968 23753 22605 23525 22342 22248 22576 22460 21929 22365 22229 22403 9154 14277 16288 17193 17808 19129 18289 19161 19496 19268 29367 27242 25020 24283 22868 23584 22888 22636 22212 23152 21936 22156 21924 22496 21687 22389 21952 15035 16464 19104 19281 19847 19539 20788 19911 20432 20556 27005 24155 24104 23016 23148 21824 23012 22333 22596 21735 23078 21665 22103 22083 22288 21560 22211 18544 20480 19741 21248 20967 21234 20810 22045 21060 25703 24144 23403 22279 22484 22160 22596 21511 22609 22206 22359 21553 22764 21589 21909 21561 22465 21857 21897 21984 22698 21626 22244 22712 21883 20920 22465 21936 21705 20854 22648 22872 21763 20935 22976 21579 21110 21281 22615 22153 21203 22100 23240 21411 21080 22327 22065 21313 21137 22433 22884 21152 21760 22629 21916 21889 22201 22190 21475 21938 22097 22101 21494 22346 22161 21864 21821 22584 21772 21713 22152 22064 21324 22115 21933 22291 21351 22178 22153 22040 21376 22663 21554 21977 21625 22305 21730 21989 21797 22759 21504 21846 21826 22215 21476 22167 21745 22528 21208 22374 22060 21850 21239 22160 21679 22346 21191 22449 21979 22057 21162 22312 21619 22439 21328 22258 22008 22098 21289 22128 21878 22200 21297 22529 21858 22097 21664 22692 21518 21876 21585 22395 21601 21852 21847 22656 21420 22027 22008 22082 21461 21854 21824 22418 21312 22181 22087 22094 21264 22100 21740 22127 21075 22432 22465 21479 21170 22707 21602 21085 21444 22387 21728 20992 22427 23108 21187 21583 23119 21635 20777 22483 21781 21912 20895 22473 22695 21528 21369 23236 21464 21001 22792 21505 21673 21779 22231 21800 21857 21895 22436 21766 21847 22235 21941 21484 22079 21880 22139 21312 22295 22084 22131 21415 22528 21671 21908 21354 22400 21957 21900 21760 22713 21337 21960 22069 22069 21369 22021 21748 22552 21680 22040 21888 22220 21376 21877 21808 22668 21321 22117 21753 22311 21744 21842 21565 22730 21479 21890 21671 22407 21592 21888 21635 22796 21469 21936 21720 22464 21842 22043 21694 22549 21479 22203 21171 22444 21991 22090 21123 22518 21641 22368 21197 22134 21927 22134 21493 21782 21787 22565 21617 21843 21444 22374 22005 21826 21415 22547 21645 21953 21335 22090 22179 22016 21394 21509 22213 23012 21309 20985 22474 21856 21331 20960 22321 23200 21330 20894 22141 22073 21870 21402 20976 22847 21641 21348 20951 22544 22582 21508 20800 22760 21806 21119 21301 21872 22493 21656 21793 21990 21897 21767 21720 21662 22468 21649 21632 21927 22204 21719 21720 21909 22644 21954 21765 21872 22083 21552 21807 21539 22672 21485 21943 21129 22420 22085 21857 21282 22454 21806 22235 21495 22068 21991 22203 21180 22245 21530 22359 21285 22253 22004 22067 21322 22344 21588 22188 21192 22222 21978 22135 21241 22149 21856 22567 21313 22058 21888 22064 21539 21948 21624 22821 21731 22035 21136 22357 21924 2849 7669 11275 12019 13537 13079 14233 14701 15014 14467 32796 29072 27555 25248 24455 23647 11767 13988 15725 16294 17809 17191 17709 16871 18370 33920 29216 26432 24599 23760 24634 13001 15947 16472 18304 19881 18832 18816 18781 18641 33513 28124 25728 23734 23993 24540 15011 16922 18087 20059 21382 19946 19504 19693 20728 21293 26600 24853 23629 23852 23369 18434 19349 20288 20940 21723 21018 21355 20938 21415 21696 25168 23531 22990 22464 23001 22496 22745 21831 22112 21936 22752 22173 22288 21504 22172 21890 22796 21760 22089 21485 22536 22220 22272 21272 22149 21846 22921 20898 22011 21687 22481 22088 21897 21447 22039 21730 22833 21572 22088 21376 22699 22015 22275 21394 21895 21815 22677 21507 22086 21405 22509 22050 22151 21321 22177 21806 22742 21238 21941 21514 22371 21944 22149 21399 21943 21889 22629 21457 21785 21771 22344 21952 22125 21537 22340 21853 22407 21771 21906 21543 22473 22221 22475 21426 21591 22007 23152 21779 21091 21522 22653 22851 21618 20610 22099 22291 23144 21496 20904 21430 22622 22833 21704 20687 22101 22325 22743 21176 21257 22477 22217 21984 21392 20773 
21651 22039 21453 22368 21595 22289 21389 21595 21176 21794 21239 21754 21595 21904 21823 22027 21844 21984 21208 21640 21392 21792 21419 22071 21573 22295 21849 21954 21483 21648 21198 21756 21632 21802 21975 22193 21646 21959 21078 21376 20864 21000 21232 21742 21498 23059 22364 22818 22138 21632 20884 21015 20692 21543 21864 21896 22724 22553 21719 21392 20823 20756 21259 21431 21058 22389 21847 23057 22497 22501 21912 21635 21520 21430 21384 21927 21477 21639 21548 22138 21763 21768 21104 21815 21771 22436 21386 21816 21229 21856 21665 22101 21648 22011 21165 21937 21696 22208 21292 21716 21280 22140 21881 22004 21640 21959 21299 22023 21780 22357 21344 21605 21380 22249 21867 21909 21113 21902 21733 22328 21356 21684 21640 22184 21810 21789 21242 21729 21776 22307 21518 21643 21477 22208 21805 21767 21230 21768 21830 22295 21427 21575 21679 22043 21574 21821 21620 22382 21587 21827 21032 22134 22288 21811 21021 22279 21927 22208 21081 21984 22275 22088 21330 21293 21874 23068 21114 20873 21637 22528 21835 21200 21645 22959 21223 20919 21128 22612 21858 21283 21906 23079 21144 20900 13751 17629 16833 17889 19228 19474 18395 19849 20393 31335 24984 24465 22914 22145 22349 22177 22046 21593 21991 22200 21766 21549 22065 21713 21555 21577 22004 21856 21573 21870 22103 21585 22033 21984 21873 21595 22212 20796 21730 21988 21690 21465 22170 21413 21564 21986 21746 21249 22136 21493 21643 21978 21792 21430 22299 21857 21779 21952 21921 21575 22406 21379 21862 21937 21800 21205 22354 21376 21804 21927 21344 21477 22346 21788 21826 22007 21780 21320 22347 21495 21760 22001 21856 21367 22352 21560 22039 21841 21915 21664 22381 21361 22000 21896 21621 21378 22321 21546 21828 22013 21411 21295 22435 21318 21847 21811 22260 21408 22346 21384 21848 21909 21770 21557 22257 21378 22133 21739 21667 21821 21935 21293 22171 21648 21712 21834 22011 21282 22152 21634 21608 21723 21793 21447 22145 21358 21698 21722 21771 21270 22087 21243 21813 21681 21136 22215 21680 20778 22931 21214 21321 22822 21113 21217 23124 21304 21609 22880 21560 21104 23120 21317 21934 22775 21280 22080 22812 21137 22480 22368 21463 22077 23025 21286 21716 22912 21568 21877 22496 21644 21879 22074 21576 22093 21920 21515 21896 21897 21624 22073 21907 13190 18140 19355 19420 20320 20057 20306 20303 20263 20845 26632 23701 23552 22057 21909 22262 21959 21676 22396 21480 21971 21921 21799 21860 21872 21412 22053 21273 21923 21584 21539 21621 21896 21174 22155 21456 21661 21952 22144 21443 22257 21289 22216 21577 21685 21624 21662 21505 21979 21281 22265 21445 21968 21862 22005 21737 22076 21228 22090 21264 22061 21349 21640 21999 21997 21675 22149 21228 22150 21205 22231 21399 21777 21875 21740 21777 22083 21271 21956 21166 22412 21537 22194 21414 22112 21417 21959 21789 21735 21744 21640 21998 21728 21742 21989 21400 21792 21223 22311 21378 22285 21353 21980 21448 21789 22020 21933 21824 22234 20841 22123 20685 22860 20924 22191 22231 21125 22057 20928 22313 21517 21550 23083 21101 22378 21963 21168 22032 20816 22659 21621 21719 22544 20967 22411 20919 22102 21280 20896 22609 21328 21316 22054 21696 21977 21601 21888 21701 21376 22161 21591 21905 22016 21543 21909 21721 21722 21650 21463 22198 21536 22088 21685 21578 21565 21634 22075 21664 21867 21842 21579 21760 21268 22284 21646 22144 21544 21922 21427 21719 21981 21547 21762 22114 21415 21880 21199 22280 21479 22183 21368 22075 17730 19779 20649 20855 20899 21200 20838 21264 20760 28640 23815 23368 22037 22120 21731 21837 22016 21936 21671 22195 21177 22224 21359 22117 21376 21769 21976 21686 21779 21827 21344 21909 21339 22341 21350 22293 21293 22112 21360 21661 21786 21735 21729 21781 21464 21856 21179 22264 21365 21867 21892 21814 21734 21826 21345 21879 21248 22343 21510 21777 21939 21677 21888 21897 21225 21940 20864 22740 20569 21680 22607 21306 22259 21379 21824 21668 20681 22833 21165 21644 22693 21391 22395 21531 21347 21819 20678 22972 21120 21312 22817 21228 22296 22055 21176 22321 20714 22167 21658 21472 22210 21462 21996 21839 21418 21927 21714 21542 21719 21371 22066 21653 21857 21972 21492 21991 21712 21493 21815 21216 22184 21579 21536 22031 21876 21745 22145 21282 22157 21432 21902 21425 21645 22033 21752 21344 22198 21491 22112 21682 21706 21677 21815 21560 21833 21211 22244 21336 21901 21925 21852 21805 21917 21480 22036 21205 22194 21373 21720 21814 21820 21432 22363 21449 22168 21602 21714 21661 21656 21760 21766 21289 22429 21474 21972 21756 21824 21787 22029 21233 22129 21244 22097 21369 21552 21707 21728 21158 22288 21155 21985 17949 20338 21026 21432 20951 21621 20901 21751 21200 21317 24087 22645 21736 22565 21993 21895 22148 21676 21698 22623 20909 22520 22264 21122 22435 21887 21065 22223 20631 22493 21378 20837 22452 21918 20585 22752 21114 21358 22784 21564 21928 22617 21165 22500 22117 21243 22320 22566 21082 22530 21804 21289 22038 21609 21650 21732 21580 21749 21808 21428 21707 21692 21463 21808 21732 21351 22036 21696 21613 21637 21897 21367 22052 21568 21458 21952 21655 21413 22295 21707 21843 22007 21712 21681 22231 21396 22121 21799 21660 21785 21773 21319 21964 21272 22073 21468 21589 21711 21793 21251 22375 21419 21779 21922 21568 21482 22232 21320 22231 21597 21714 21749 22064 21388 22215 21621 21632 21707 22102 21203 22161 21411 21712 21685 21824 21406 22267 21488 21826 21645 21636 21621 22005 21185 22293 21407 21704 21841 21901 21218 22125 21434 21577 21826 21824 21175 22249 21326 21661 21860 21784 21197 22211 21408 21643 21905 21842 21163 22596 21423 21379 22472 21442 20580 22566 21249 20930 22540 21343 20865 22952 21062 21416 22748 21412 20868 22919 21193 21370 22716 21764 20992 23111 21147 21124 22801 20769 21120 23005 21453 21665 22188 20480 21072 21739 21449 21236 21958 21436 21345 21843 23717 22119 22232 21739 21487 21754 21848 21389 21509 21833 21976 21344 21952 21774 21765 21783 22137 21411 21926 21853 21764 21361 22249 21440 21493 21765 21752 21219 22101 21485 21621 21696 21774 21153 22171 21408 21706 21470 22024 21329 22032 21608 21751 21581 21995 21299 21810 21677 21802 21232 22145 21461 21559 21719 22035 21154 22181 21573 21556 21728 22082 21239 22262 21596 21767 21837 22294 21215 22176 21605 21653 21719 22016 21293 22124 21577 21605 21788 21936 21259 22144 21466 21765 21762 21893 21385 22135 21424 21661 21728 21927 21143 22187 21812 21262 22053 22043 20952 22553 21809 21224 22447 21859 20953 22277 22423 21373 22160 22723 21189 22177 22627 21298 22179 22597 21025 21975 22743 21425 21927 22897 21177 22184 22480 21520 22061 21713 21436 21831 21998 21365 22064 21856 21472 21968 21682 21523 21870 21424 21817 21609 21559 21859 21689 21361 21811 21692 21569 21613 21895 21185 22071 21453 21639 22009 21828 21433 22304 21450 21719 21969 22272 21277 22221 21395 21689 21772 21845 21216 22264 21419 21654 21866 21777 21223 22202 21459 21562 21735 21734 21216 22256 21299 21610 21793 21939 21197 22241 21410 21751 22080 21819 21164 22399 21304 21482 21827 21862 21233 22400 21278 21944 21824 21762 21595 22220 21351 22071 21775 21690 21847 22041 21345 22215 21639 21668 21817 22077 21305 22049 21670 21733 21817 22016 21103 22194 21717 21117 22093 21584 21053 22398 21443 21212 22316 21889 20977 22389 21541 21317 22148 21395 21026 22359 21192 21214 22352 21436 21088 22460 22115 21143 22406 22673 21285 21892 22281 21603 21965 21852 21568 21928 21968 21521 21932 21937 21509 21892 22020 21355 22048 21909 21658 21851 21950 21440 22080 21580 21651 21827 21783 21380 22102 21513 21657 21647 21753 21379 21988 21325 21838 21568 21664 21703 21831 21161 22201 21433 21597 21793 21824 21138 22165 21536 21748 21561 21844 21252 22006 21526 21664 21664 21907 21152 22256 21361 21600 21771 21824 21237 21996 21485 21645 21596 22032 21113 22226 21371 21832 21280 22089 21287 21815 21717 21833 21256 22181 21539 21639 21756 21797 21399 22038 21409 21611 21701 21773 21207 22119 21845 21570 21740 22215 21223 22145 22541 21520 21883 22916 21339 21963 22723 21417 20820 23096 21135 21126 22705 21368 20880 22963 21216 21152 23018 21648 20598 22304 21388 20691 22441 21522 21517 22009 21632 21440 22146 21540 21625 22070 21776 21735 22140 21465 21925 21958 21635 21911 22109 21527 21888 21914 16588 18291 19075 18880 19576 19541 19554 19469 20248 28616 24746 23591 22603 21976 22698 21559 21779 21973 21860 21168 22283 21332 21662 21611 21912 21190 13136 17803 19392 19805 20480 19922 20576 20531 20807 20082 26995 23856 22908 22039 22654 21645 21878 21806 21817 21226 22152 21387 21869 21370 22065 21366 21792 16368 19815 19767 20822 20992 20811 20764 21644 20736 21013 24906 23195 22038 21992 21948 22257 21549 21950 22081 21793 21180 22052 21733 21421 20884 22569 21966 18373 20594 21996 20736 21530 22352 21011 20254 22288 27002 22423 22129 22804 21810 21248 22208 22624 21295 21353 22672 21389 20573 21960 21735 21400 21625 21896 20663 20903 21588 21692 21528 21591 21968 21378 21362 24016 22244 21671 21669 21900 21865 21408 22081 21901 21713 21441 22204 21480 21524 21828 22120 21582 21586 21811 22249 21497 21792 21931 21669 21252 22148 21490 21665 21228 22137 21683 21707 21243 22248 21403 21628 21484 22039 21481 21667 21685 22193 21256 21942 21766 21824 21229 21683 21735 22170 21264 21956 21792 21741 21327 22365 21385 21680 21309 22136 21420 21717 21773 22193 21349 21967 21852 21749 21248 22157 21422 21517 21742 21955 21516 21607 21675 22314 20904 21785 21812 21890 21147 21771 21632 21936 21131 22121 22258 21843 20789 22357 21735 21212 20994 22566 22072 21292 21844 22931 21458 20962 21479 22468 21464 21169 22176 22991 21242 20825 21586 22328 21511 21081 21896 22957 21239 20627 21642 21833 21664 21252 22030 21828 21570 21760 22111 21512 21338 21632 21862 21552 21372 21929 22019 21529 21654 22031 21714 21305 21531 21821 21935 21387 21864 21858 21670 21202 21987 21655 21710 21313 22159 21744 21821 21661 22273 21437 21617 21456 22082 21381 21533 21672 22126 21413 21845 21824 21733 21205 22125 21419 21632 21249 22129 21651 21786 21514 22288 21345 21704 21862 21775 21095 22066 21639 21892 21120 22211 21735 21805 21251 22336 21324 21593 21576 22018 21401 21658 21816 22153 21355 21708 21808 21811 21175 21607 21804 21970 21368 21937 21984 21918 21269 22274 21436 21527 21191 22064 22039 21712 21169 22670 21728 21080 20954 22599 22316 21492 21287 22953 21912 21720 20866 21944 22785 21345 20573 22176 21939 21545 20827 22393 22741 21364 20526 22080 22316 22272 21335 21738 22166 21465 21547 21432 21978 21908 21844 21444 22010 21731 21622 21511 21915 22029 21604 21420 21413 21868 22118 21504 21538 21609 22002 21767 21704 21504 22213 21431 21484 21397 22054 21999 21680 21208 21712 21660 22052 21541 21685 21923 21831 21205 21586 21733 22237 21216 21673 21821 21829 21336 21516 21467 22320 21446 21666 21270 22167 21560 21815 21237 22192 21386 21625 21204 22109 21780 21922 21289 22387 21481 21636 21193 22042 21834 21927 21159 22083 21511 21792 21165 22090 21864 21721 21227 22101 21573 21725 21181 22040 21960 21817 21252 21709 21735 22151 21323 21652 21678 21893 21332 21120 21161 22754 21256 20905 21456 22517 21819 21287 21750 23008 21079 20855 21788 22137 21283 21143 21841 23043 21111 20727 21433 22505 22151 21398 21132 22729 21736 21371 21556 21888 22181 21599 21444 21349 21960 22061 21655 13585 17787 18841 19287 19274 19845 20084 19799 19435 19868 26400 24162 22574 22244 22174 13081 17939 19507 20110 20864 20320 20520 20261 21136 20943 26793 23463 22775 22321 22656 21737 18344 19441 20978 20992 21021 20493 20967 21024 21716 26807 23728 22288 22592 22139 22090 18160 20415 20852 21617 20881 21152 21080 21799 21426 21653 22824 22789 22034 22436 21531 19533 20583 21753 21569 21613 20967 21440 21438 22099 21265 22800 21687 22210 22022 21915 21541 21849 21414 22018 21750 22038 21560 21522 21408 22103 22061 21688 21062 21399 21993 22755 21344 20896 21490 22616 22617 21770 20693 22155 22193 22311 21067 20825 21046 22459 22731 21323 20684 21169 22361 22756 21148 20788 20968 22373 22820 21307 20925 21684 21978 21895 21460 21221 21888 21741 21993 21505 21413 21748 21927 21730 21501 21323 21620 21855 21994 21312 21556 21682 21981 21715 21719 21513 22109 21612 21891 21548 21647 21824 22104 21635 21851 21280 21819 21773 22165 21342 21558 21613 22078 21670 21741 21248 22152 21528 22053 21490 21594 21710 22068 21604 21760 21432 22211 21478 21990 21221 21976 21835 21864 21286 21699 21222 22123 
34725 38804 42692 42427 34368 41190 42069 34318 39456 36166 40472 36049 34065 37056 36733 38752 36750 38160 40001 34475 41441 36159 42186 39517 33847 41416 37056 37872 42988 34620 39905 36048 34088 36117 38304 40557 34736 38053 38616 41442 36198 37536 40176 35996 42981 39669 42476 36896 40008 34240 36210 37901 34380 33241 36788 37208 35728 33715 35352 41472 36128 34866 40329 42524 38505 42729 37172 39299 43728 44080 37704 34378 32673 42008 41845 33283 34855 42458 39987 36468 39392 37827 37552 35015 32863 41488 35154 42616 34537 36220 35386 37844 38216 38704 38966 37778 37348 42188 34819 39368 33073 37261 38784 35239 41160 37095 37303 34263 33705 39577 35309 40003 41408 41419 37357 37472 39072 37536 35655 41740 41767 35136 34229 40224 36406 36181 40407 35624 35685 41558 33289 34375 42627 40768 36553 35894 40345 35876 36539 41559 42445 34071 34992 38869 33792 36480 34209 42476 34146 36423 37935 39996 41356 36549 38016 41408 37975 40576 38822 38237 41269 39506 41261 41104 37216 39525 39168 36402 34340 33063 36591 39740 34715 38465 40387 37143 38987 34534 36760 40647 37465 39760 39318 36646 32828 32528 33776 35203 39211 31729 40525 36128 41735 46316 39449 44408 38045 39923 42376 40514 39168 34096 38419 40620 35949 33456 38879 35345 33403 33557 38372 36791 33690 37048 39672 33888 38503 38232 37076 34087 40513 35808 35416 38240 35136 42535 40519 42226 33881 38133 35743 40089 40038 43136 34849 38184 36000 42189 41888 36991 35961 37725 37504 33836 42449 41891 37217 37724 36172 39968 42215 41634 36521 37744 41323 43016 42370 36244 36416 38705 35952 40966 42379 43356 35826 38448 36786 41767 42189 33698 38774 36727 37616 34592 42480 41784 38601 37258 34426 41379 41920 33565 36323 38804 42181 41270 43201 41352 37092 36390 41156 41994 42321 41861 36952 37460 35879 33466 41040 41712 40179 35943 34736 36531 37944 40960 40576 34509 35034 36560 38784 40627 40120 34386 33952 35448 35984 42440 40110 41819 35264 35399 35882 40448 39623 40697 36561 34871 38881 40951 34957 35178 37931 40264 41252 37008 39097 40129 40231 40981 34359 37248 33457 38552 39993 41169 38017 36647 40431 39233 36837 39098 43389 42488 42988 39664 39232 40785 35460 37539 33441 37024 43481 34791 37221 39248 33738 39415 37504 33066 37017 37305 34304 39136 37495 36549 38124 40777 41579 41081 38496 40846 41225 40684 36373 36043 36154 34133 38996 37552 41382 38330 34972 42603 43029 38464 37577 36359 36864 36936 41928 39221 40663 37776 33691 33077 34160 37061 39634 40301 42483 35082 37680 39725 42509 41484 40976 40920 33929 34889 34192 34669 32568 38186 40601 41589 42620 38236 37013 38632 35767 39222 40393 39570 40344 39360 41557 34547 38632 38681 35076 39922 40436 40170 40152 41221 42185 36087 37130 35736 35798 39257 40730 38081 39697 42851 33428 40304 42214 39731 42249 38371 36284 35705 35521 34248 38503 35447 35761 38369 41857 36153 40273 41936 41749 41704 41744 38528 42417 36450 38439 37894 36362 40998 36234 39901 34573 37169 37028 40709 41282 39246 39172 36881 41701 33293 33299 39606 39136 42565 38469 39447 38656 35628 34891 34216 35383 33375 37395 42817 37260 39552 40563 36548 34357 40857 41120 39152 35044 38208 34041 36864 35196 41291 40267 34178 37189 38331 33488 37303 35491 35393 34372 42553 40862 33237 39133 35126 33664 33563 34061 39219 34672 37056 36642 33840 35397 40304 41515 34795 39648 33368 37336 42214 35766 38379 33585 35487 39528 42289 37379 40144 41356 43124 40825 41768 39588 33612 35107 33787 36169 36599 39708 36129 40193 35121 47648 37976 42680 39032 39813 35714 36736 38311 37653 34976 40470 39864 40857 41952 39988 41539 36056 38135 35084 35885 36504 41160 37635 41456 42249 41712 41709 41138 39669 41521 35028 35948 35712 35417 35928 42458 36972 39818 41430 41872 37376 37169 36417 35594 36368 41265 37504 40064 42301 33098 35680 37760 35052 36900 37301 40258 37900 36038 35864 33080 34555 34536 40822 41508 41849 36535 34695 34176 36736 39625 34587 35340 41872 43028 33581 41232 36784 34213 38421 38848 40864 36838 40311 41568 39320 39693 41873 34933 40220 34808 42384 40861 42808 38786 36992 42116 37992 35312 33193 35352 41719 39250 34689 36759 38108 42924 38804 35236 42864 36792 39925 40481 34037 32877 38704 37149 35696 39799 40693 40392 42368 37681 42138 34841 38560 35851 41126 40810 43146 39790 35002 35169 34950 36422 33440 36470 40133 41198 41389 37668 37685 36909 36432 37626 42752 38930 40096 40597 42019 35608 36352 36469 42171 42636 42728 40438 34133 35137 34728 34432 35412 35712 40692 43212 42928 38377 35994 36300 36142 38748 40337 39972 40629 39574 41838 33494 35201 35270 39360 41312 39649 38400 36136 41126 38052 42232 37576 34387 36549 35916 39686 41191 40709 35157 35488 33831 38248 37408 39917 35044 34956 34788 36782 43863 41648 39121 43092 37812 38480 41168 33945 43574 41843 36225 43047 37840 33249 35788 38989 41728 36365 33575 37426 34632 39547 43748 40087 40720 41784 34180 38521 33393 36149 40704 38964 34281 34312 35387 33716 35676 36104 42077 35594 35072 42597 36393 35488 41482 38866 35028 34251 34244 37184 41774 39076 33539 42240 37984 34771 41929 41816 35574 36697 38727 35233 34794 40976 41926 40044 36454 34680 35963 35940 41126 38304 40499 39419 42796 34199 35400 35975 40212 42688 42496 36224 37467 33526 42640 41146 41208 41292 34328 35152 35762 38864 41839 41129 34532 34018 35243 39465 40087 40216 42181 35389 34967 36231 42019 41765 42965 36690 34600 34155 34209 38503 39712 41600 42410 35392 36578 37431 40067 40097 42468 34020 36301 36288 39728 41337 41472 35030 36800 35936 39952 40852 41984 34791 37208 36644 39591 34325 42228 41860 43544 42575 33313 33700 40008 37005 33568 41398 36295 38168 38439 42040 36363 41895 36352 37936 39895 41820 35975 35570 37271 40108 39559 39032 36553 35158 38663 39120 42752 34928 40406 31748 38096 35824 42378 40525 38182 42394 41568 36949 36427 39842 41044 35975 43040 36154 36709 41832 33103 36471 38156 41241 37960 36040 35745 36057 39973 42161 37881 37046 35672 41429 41416 42353 43265 36071 35739 40096 39703 43126 34641 34837 35892 39242 40485 41954 35467 42709 38784 41195 38722 34160 35808 33856 38444 40918 36448 35003 36160 40096 40016 42731 33941 35408 38656 39376 40531 33872 33252 35192 39116 40604 41536 34242 35793 36744 41434 40536 40310 34295 34491 35419 38248 40972 40032 33906 33987 35968 37553 40497 39913 42802 36052 35608 37191 41717 40292 42152 35067 35284 37680 39393 40689 36488 40481 39145 39076 37289 33781 36149 40088 43496 37264 37318 41264 43177 42160 40180 35948 39751 40365 34903 40640 40529 34515 37763 38345 36213 42055 37972 37728 39750 40458 43498 33136 39028 35350 42257 36928 38635 41728 39148 36835 42508 38222 34942 32921 37016 41975 36695 34183 33498 36787 35077 41389 36568 35111 33451 34165 37236 39664 39431 42726 34777 38592 36544 42267 41664 42683 35794 38039 40987 40902 41169 42016 35344 35811 36726 39923 41448 42435 34868 36951 35842 40256 40817 42742 33865 35592 35537 39861 41239 41057 34386 35951 37765 40043 41157 42093 36199 39088 36677 39520 43048 41133 43050 36816 36985 40240 42512 40966 37999 36375 35622 34019 40725 41754 39523 36248 35064 36821 38833 41394 41081 34702 34602 36368 39369 41074 39014 34913 35530 36416 38288 39171 40565 35596 39146 39668 33793 38284 42893 42688 40359 41942 37340 37512 42652 33604 40888 40096 41993 38081 42408 40016 40341 42146 42614 38779 43392 40032 39541 42742 35373 40620 37277 41364 34280 38119 36934 33448 37440 37991 32960 37573 37748 32908 36944 38471 41704 38945 37536 34684 36855 38060 42160 39330 33912 34416 36429 36088 41483 39768 33048 34482 34592 35783 41545 38522 41336 36986 33433 34372 35192 36608 39475 40784 42484 34408 35944 36264 39059 40298 33201 35540 33504 36520 40151 38770 33161 34361 34422 37292 39188 41216 41697 34092 35833 36264 40356 38662 43075 34882 33927 38381 39121 40907 42002 36756 40424 39569 40944 36696 35415 36568 40231 40561 33431 34337 35811 36150 41914 39012 42005 34536 35105 35906 40068 40005 36944 33548 35560 40809 40484 40009 33864 32640 37161 37793 41447 38363 35844 42039 35905 39713 39478 39136 35596 41511 36391 38401 39996 39300 39200 34460 33255 41194 41972 34624 42928 33210 32871 38492 34185 41960 40080 33322 34234 39057 35801 35680 39992 42808 37909 38068 34405 37450 39791 33332 36827 37448 31468 39391 37804 35509 32924 32389 32448 31505 39830 47718 37034 35018 34386 38057 35537 33550 35813 38162 36920 39383 41549 41354 35041 34208 37271 39797 35984 34464 40679 35864 31520 36521 32852 32282 35477 38438 40547 37911 37985 38963 35273 34509 37085 36411 36445 40218 40087 41984 37425 41728 39264 41779 36167 40171 35939 35209 35721 37284 35819 35056 34373 34416 37696 38335 41076 38983 38456 38024 41264 33714 37912 39244 36154 39702 38976 35728 42204 36576 33971 38114 40496 33362 38365 34589 32981 41747 37986 40419 41345 40790 43128 40080 36663 36276 39992 40635 34674 40901 41676 35180 41777 33385 37787 35776 41728 34635 37095 34171 36645 33782 34980 32904 33816 37824 41520 41720 39784 41188 35124 34720 37237 37065 41788 39429 37575 35288 42141 40936 42920 33272 36312 39674 34038 33619 36221 41174 43239 36232 37788 34840 40076 40038 42969 34939 40197 40177 35127 35301 40480 41259 42240 34700 42738 39168 42936 35064 34957 40366 40406 38016 35833 36272 40355 35153 35665 40193 40404 38087 36000 35772 41319 42634 42007 34998 41003 40092 42304 35664 35945 40407 41627 38552 36961 35827 39994 40336 42433 33344 35659 37927 33003 34056 34840 41608 36899 36063 36260 37061 39424 36057 34088 37467 39249 39913 41352 36928 35431 42124 35989 40066 37595 33946 39025 40896 36837 38025 42421 37512 42894 43566 42903 39776 40269 39109 40535 36017 33696 41654 33226 38503 37241 38472 40592 33752 34275 36519 34531 40064 38935 36556 33512 35367 39808 32932 41111 34309 36885 33245 41565 37909 38599 33189 34416 38776 35342 40871 33444 36472 37944 41879 37152 36851 34800 39754 38503 34792 35308 40811 40502 35744 36570 34805 41008 42656 34464 42193 39441 41773 33562 34604 39840 42199 37040 36325 35578 39936 40097 42374 34368 40042 39968 34694 35969 32853 40992 41478 35364 36917 36096 38858 39117 34609 37031 38787 40816 35913 36359 40233 41905 41392 34189 33490 38266 41968 34884 36274 39996 41772 35520 36105 36340 39730 34372 36194 38039 41639 37914 38219 37711 40544 41280 42565 33479 39744 39052 39031 35238 39408 35312 35301 38472 37356 34464 41653 43073 41088 38496 37497 35405 36041 37741 36289 41259 33360 39955 37974 33416 35835 42592 36312 41488 32751 38873 41872 41254 41597 35883 40161 42808 33774 42016 38508 37408 36675 42246 38912 35683 34289 32806 37433 38796 34105 41984 42314 37329 39776 32724 32919 33969 38347 35960 35105 32469 40547 42534 43168 42152 39223 38840 34849 39840 35285 34633 38766 33358 34864 37510 36716 39980 33920 35496 41096 40128 35021 36544 36560 41164 33175 42548 41864 42633 34921 40416 40493 33632 36381 40372 40503 41878 34643 39790 39896 36019 37435 40779 42759 43156 34570 39745 38964 36721 37747 39593 39427 33104 35776 39592 39526 37059 35469 40288 39702 33843 35484 39781 38848 38048 36526 40170 35547 35673 40064 41380 34693 34904 37159 41169 39000 39584 36195 40217 36871 42291 44234 36934 40810 35987 38741 38792 36407 36043 39989 40832 39528 36744 39168 39210 35061 42176 44084 40469 42041 39351 35976 35538 41738 33641 36840 40396 34387 42127 41693 38180 39252 34820 30720 34172 35089 39975 39944 36074 38499 35664 41564 36517 43952 41526 34380 40928 40584 35600 35784 32117 38679 36065 40812 32453 40137 39124 37440 38187 43831 36907 41732 34968 35504 40025 41677 37713 37376 38035 32132 37338 37776 35328 38357 36426 41181 34279 39993 39542 38289 42311 36352 34147 36179 39132 38633 36400 42021 34864 36658 36384 38616 42972 33563 32421 33028 35704 33479 34160 37424 42128 42712 39781 40493 36528 35141 40520 38739 37712 33336 36672 42013 38645 35924 38743 33520 32729 41546 39877 39330 35080 38309 42012 38712 36301 41154 36585 42779 34769 34512 35618 34368 40042 40618 41972 38795 35927 38167 43424 36297 41191 34528 39373 42400 36411 39319 35425 37315 42416 36954 41072 37271 34924 38195 37408 42513 40441 37149 35845 38441 32784 41829 35924 37734 35504 43106 41511 34455 37004 38480 40900 33608 34698 38345 35436 35467 32818 39571 34354 37106 33389 34532 36208 39472 34466 36814 40421 36736 36000 40168 41624 33766 34184 39273 34904 35738 39972 40087 33187 38813 42869 34266 35285 39015 34100 35392 42101 40960 42992 38688 40285 38341 36812 36931 40680 35332 40107 40067 
23297 22784 23204 22802 23423 23144 23584 23307 23671 23145 23472 22761 23095 22807 23284 22802 23494 23063 23706 23311 23517 23028 23191 22695 23332 22887 23197 23220 23503 23345 23535 22935 23239 22881 23120 22802 23473 23172 23932 23512 24042 23511 23204 22537 22702 22226 22164 23044 22796 23968 23884 24148 23744 22849 22428 22613 22730 22742 23981 23658 24324 23755 23303 22981 22544 22267 22704 22450 22754 23424 22983 23655 23228 23670 23174 23312 22825 23010 22714 23223 22921 23008 23321 23237 23470 23553 23309 23312 22743 23053 22861 22976 22827 23216 22819 23399 22916 23543 23249 23715 23123 23089 22677 23192 22832 23158 23149 23340 23342 23559 23258 23469 22728 23047 22805 23165 22735 23587 22871 23747 23148 23645 23114 23364 22710 23017 22606 23390 22752 23262 23028 23227 23175 23520 23307 23557 22810 23178 22687 23008 22810 23201 22812 23415 23041 23635 23111 23698 23048 23976 24514 23603 23482 23894 24256 23880 23488 23786 25055 23505 23720 23235 24375 25050 23510 22902 24026 24380 24168 23463 24018 24931 23833 23098 23524 24649 24552 23527 24084 24952 23517 22877 23899 8509 16022 17325 19031 18968 18223 17997 20006 18423 18121 29783 26297 25312 24934 25224 24682 24567 24583 25057 24142 24140 24280 24411 24101 24020 24354 24335 24056 24244 24379 23745 23827 24487 23814 23958 24188 24106 23591 24384 23808 23845 24000 23957 23541 24189 23799 23831 23671 24318 23575 24009 23756 23826 23673 24001 23408 24335 23589 23820 23992 23914 23413 24361 23552 23863 23635 24076 23399 24273 23493 23747 23797 23969 23327 24253 23464 23683 23724 23961 23329 24240 23597 23766 23795 23985 23268 24356 23436 23812 23871 23960 23400 24439 23464 23623 23881 23898 23287 24143 23589 23680 23746 23862 23232 24213 23527 23735 23814 23973 23366 24204 23466 23702 23978 23845 23379 24320 23352 23905 23940 23765 23725 24263 23544 24069 23844 23971 23639 24237 23501 24000 23959 23760 23818 24067 23488 24065 23687 23635 23796 24083 23176 24178 23650 23321 24023 23293 23305 24020 22702 24094 23464 22784 24247 23642 22597 24509 23334 22793 24692 23613 22714 24553 23240 23074 24762 23289 23023 24949 23329 23439 24756 23306 22797 24656 23264 22848 24687 23204 23372 24020 23641 23424 24140 23630 23749 23937 23553 23620 24059 23620 23632 17385 19479 19482 20291 19781 20451 20207 20238 20382 20412 26341 25446 24354 24798 24464 24261 24252 24221 23718 24596 23802 24069 24171 24156 24016 24286 23496 24384 23688 23825 23895 24117 23356 24213 23470 24000 23549 23696 23745 23897 23280 24381 23644 24111 23704 23623 23772 24100 23301 24005 23277 24122 23335 23706 23816 23841 23527 24138 23200 24240 23362 23880 23382 23558 23763 23759 23485 24104 23289 24158 23281 23863 23332 23704 23785 23852 23437 24084 23232 23776 23148 24228 23393 24009 23281 23814 23356 23808 23646 23484 23515 23496 23777 24142 23673 23853 23377 23723 23218 24148 23327 24024 23468 23702 23335 23341 23911 23496 23650 24295 22775 24107 22664 24452 23093 23577 24257 23163 24226 22872 24075 23417 22536 24753 23092 23915 24205 23014 24009 22625 24210 23165 23491 24452 23000 24396 23136 23536 23781 22709 23801 23226 23406 23831 23458 23639 23584 23361 23584 23191 23972 23300 23502 23868 23424 23735 23561 23307 23593 23179 24022 23040 23863 23472 23534 23368 23369 23787 23705 23592 23724 23155 23724 22987 24071 23328 23920 23304 23731 23251 23405 23652 23561 23397 23888 23024 23703 22998 24071 23204 23970 14859 19844 20207 20683 21075 21261 21153 21491 21016 21462 26213 25597 24221 24751 24048 24015 23727 23892 23932 23863 23504 24257 23204 24113 23341 24045 23309 23672 23717 23708 23650 23896 23365 23701 23162 24122 23296 24000 23175 23646 23293 23538 23859 23625 23640 23717 23305 23844 23232 23852 23255 23457 23736 23526 23552 23727 23065 23741 23060 23907 23188 23411 23853 23465 23632 23899 22714 23882 22656 24041 22980 23075 24501 23079 24156 23175 22912 24077 22615 24228 22967 22888 24512 23249 24056 23532 22930 23751 22489 23635 23149 22758 24592 23160 23742 24032 22797 24150 23296 23355 23442 23008 23959 23605 23597 23687 23366 23561 23567 23040 23688 23062 23769 23137 23349 23629 23415 23507 23713 23040 23748 23081 23417 23232 23204 23611 23459 23200 23865 23002 23785 23187 23377 23184 23312 23364 23524 22988 23944 23080 23591 23491 23428 23412 23591 22968 23732 22965 23763 23034 23355 23585 23437 23364 23696 22861 23694 22942 23721 23243 23367 23429 23440 22876 24000 23147 23785 23401 23335 23338 23483 23211 23660 22848 23843 23067 23452 23492 23147 23210 23904 23046 23872 23147 23367 23349 23447 23139 23498 22894 23851 23067 20168 21420 21456 21655 22119 21404 22301 21735 22005 28280 24595 23942 23914 23233 24089 23272 23387 24064 23312 23218 24555 22598 23159 24355 23152 23774 24052 22731 24144 22710 23021 23815 22552 23932 23740 22593 23656 23079 22400 24264 23008 22759 24532 22941 23372 24400 22608 22845 24466 23137 23449 23680 23104 23623 23421 23240 23515 23452 22997 23659 23319 23116 23399 23312 22992 23604 23140 23202 23402 23588 22846 23702 23076 23328 23250 23292 23161 23374 22834 23703 22970 23232 23499 23406 22985 23886 23207 23629 23415 23399 23364 23632 22812 23769 22993 23381 23217 23420 22974 23471 22826 23701 23052 23152 23345 23322 22800 23820 22772 23492 23345 23330 23093 23950 22822 23565 23389 23274 23152 23693 22962 23577 23245 23229 23206 23707 22967 23680 23193 23377 23217 23411 22892 23554 22960 23285 23226 23270 22871 23684 22981 23292 23316 23312 22955 23602 22977 23206 23178 23127 22932 23544 22955 23371 23229 23072 22962 23370 22539 23539 23139 22574 23389 23751 22636 23067 23499 22477 23220 23405 22099 23716 23061 22284 23563 23283 22243 23700 22925 22302 23492 23109 22233 23521 23056 22326 23688 23047 22259 23492 23224 20172 22272 22184 22272 22199 22624 22250 22561 22528 22557 23840 23856 23316 23284 23442 23395 22892 23705 23523 23335 23232 23756 23243 23258 23428 23245 22870 23837 22954 23105 23152 23368 22752 23350 23144 23206 22830 23521 22885 23150 23158 23361 22810 23545 22834 23217 23236 23492 22772 23681 23076 23154 23324 23468 22785 23712 23072 23216 23185 23672 22912 23531 23277 23311 23041 23737 22983 23504 23287 23464 22977 23687 22976 23505 23275 23459 22809 23832 22635 23461 23367 23264 23104 23677 23017 23540 23309 23185 23184 23641 22786 23504 23259 23188 23239 23561 22882 23556 23305 23252 23150 23769 22863 23447 23948 23224 23313 24157 22704 23380 24108 22907 23520 24451 22656 22597 24279 23028 22449 24365 22656 22731 24282 22211 22711 24423 22745 22489 24158 22865 22323 24272 22679 22906 23707 23178 23454 23233 23286 23026 23584 22920 23309 23422 23185 23397 23399 22835 23488 23110 22992 23229 23243 22865 23554 23157 23104 23281 23360 22868 23488 22788 23286 22936 23008 23260 23269 22695 23591 22876 22991 22949 23431 22724 23496 22955 23159 22919 23400 22656 23281 22958 23113 22999 23494 22772 23244 22980 23157 22858 23430 22744 23218 23024 23143 22936 23401 22695 23407 22849 23148 22798 23447 22745 23423 22976 23173 22971 23367 22632 23553 22799 23121 23238 23213 22789 23753 22871 23104 23373 23172 22896 23680 22734 23309 23326 23376 23153 23560 22879 23265 23345 23305 23124 23701 22912 23527 23838 22832 23513 23848 22493 23740 24056 22829 23492 23878 22656 23756 23769 22715 23744 23925 22496 23785 23927 22857 23632 24095 22726 23044 24248 22985 22362 24176 23127 22928 23603 22857 23159 23404 23258 23042 23528 23124 23115 23468 23104 23013 23552 22400 23089 23409 23169 23009 23656 22866 23320 23258 23202 23142 23542 22802 23558 23146 23073 23161 23555 22731 23577 22932 23004 23188 23261 22712 23461 22784 23262 22921 23056 22923 23407 22804 23045 23122 23400 22679 23524 22832 23093 23048 23256 22612 23477 22643 23155 23043 23300 22723 23529 22990 23064 23172 23320 22679 23538 22863 23124 23117 23511 22690 23606 23096 23079 23150 23555 22996 23408 23237 23100 23183 23436 22766 23477 23175 23162 23097 23546 22671 23140 23484 22870 22805 24121 22811 22585 24132 22812 22254 24292 22673 22357 23231 23160 22192 23646 22999 22311 23507 23201 22175 23739 23095 22453 22505 23983 22712 22777 23683 22437 23201 23095 23029 23168 23268 22726 23377 23044 22928 23425 23130 22885 23598 23040 23070 23474 23220 22920 23737 22929 11681 16551 17518 17093 18260 17572 17994 18325 18155 17716 28024 25501 24935 24680 24505 23750 24539 23697 23896 23670 24099 23225 23848 23625 23893 23200 23996 16505 18475 19031 19502 18936 20012 19613 19911 19676 20364 25856 25280 24871 24555 23637 24265 23855 23913 23409 24199 23426 23622 23746 23895 23182 23895 23691 18962 19640 20885 20263 20531 20919 20936 20360 21061 28486 25074 24057 24551 24090 24036 23437 24240 23399 23392 23424 23869 23482 23066 23808 24328 23249 23500 21715 20839 20551 22668 21106 20835 21522 22209 21044 25449 24918 24269 23197 23923 24749 23689 22795 24293 23296 22503 23127 24160 23346 22980 23723 23506 20877 21997 22795 22089 22310 22739 22402 22102 22648 22414 23992 23380 23831 23524 23492 23352 23831 23069 23189 23460 23388 22872 23351 23276 23544 23174 23534 23341 23325 22768 23796 22912 23152 23040 23538 22935 23239 23324 23689 22975 23450 23297 23436 22791 23217 23220 23633 22776 23538 23400 23348 22796 23751 22861 23449 22701 23697 23208 23509 22989 23844 22910 23104 23186 23361 22656 23186 23175 23595 22922 23525 23206 22905 22832 23702 22941 23063 23109 23401 22848 23117 23271 23336 22967 23341 23422 23212 22717 23652 23000 23128 22829 23537 23214 23105 23072 23800 22885 22581 23008 23622 22712 22606 23779 24008 22869 23053 24249 22843 22089 23521 23336 23501 22571 23639 24229 22808 22228 23515 23595 23375 22686 23445 24184 22832 22247 22689 23575 23199 23072 23187 23526 23043 23170 23428 23100 22791 23069 23294 23321 22791 23391 23351 23171 22848 23577 23010 23036 22860 23463 23328 23328 23040 23621 22845 22999 22987 23500 23000 23119 23212 23657 22237 23109 23330 23184 22690 23175 23126 23495 22780 23596 23209 23101 22768 23723 22864 23043 22960 23462 22870 22969 23095 23723 22620 23256 23296 23214 22662 23490 22844 23117 22917 23483 22912 23152 23125 23742 22770 23106 23206 23256 22628 23195 23106 23398 22739 23488 23296 23246 22690 23604 22856 23112 22809 23579 23249 23261 22962 23655 22807 22980 23146 23287 22804 23160 23193 23616 23181 22821 23573 23348 22756 22592 23676 24081 22798 22630 23958 23050 22565 22674 23374 24336 22720 22174 23129 23510 22868 22668 23399 24222 22712 22184 23191 23617 23000 22898 22680 23924 23024 22675 23018 23223 23501 22804 22999 23354 23185 22942 23031 23179 23543 22931 23050 22636 23495 23287 23136 22656 23232 23161 23381 22937 23181 23357 23179 22619 23151 23101 23509 22777 23079 22893 23474 23083 23165 22812 23612 22764 23118 22640 23576 23113 23538 22685 23552 22908 23233 22549 23493 23318 23219 22587 23160 23101 23576 22693 23266 23364 23356 22708 23034 23197 23543 22845 23056 23231 23279 22747 23108 23077 23629 22792 23008 23000 23424 22905 23032 23085 23654 22821 22903 23045 23323 22968 22937 23177 23584 22855 22992 22828 23591 23165 22952 22666 23571 23024 23165 22447 23526 23901 23127 22277 22814 23776 23642 22624 23490 24266 22763 21961 23287 23468 23271 22384 23760 24025 22728 22032 22947 23687 23512 22761 22694 24007 23040 22434 22696 23401 23282 23111 22711 23326 23166 23376 22901 22825 23129 15242 16303 16932 17276 18029 17552 17610 17669 18331 30699 26426 25180 25197 24475 24462 16391 18929 19258 19404 19017 19569 19749 20224 19430 19696 26085 25736 24974 24765 23879 16933 19828 20944 20208 20555 20497 21339 21091 20971 20480 26282 25051 25036 23992 24005 23754 21360 21367 21863 21130 21848 21752 22106 21715 21698 26134 24896 23893 24156 23306 24083 21902 22828 22132 22445 22421 22982 22664 22581 22029 22436 24017 24279 23377 23488 23136 23689 23719 23616 23334 23393 23142 23875 23466 23777 23696 23196 22921 23940 23859 23224 22556 23226 23843 23908 23212 22427 23584 23904 23584 23080 22730 23987 23895 24316 22772 22349 23144 24120 24145 23335 22380 23062 24071 24374 22804 22293 22903 23681 23593 22904 23108 23373 23495 23305 23424 23045 23576 23254 23388 23139 23226 23496 23577 23359 23456 22970 23507 23160 23463 22950 23270 23418 23364 22901 23207 23076 23716 23068 23414 23000 23266 23272 23505 23188 23211 22791 23642 23112 23508 22823 23323 23232 23512 22894 23116 22785 23692 23116 23400 22988 23252 23348 23339 22950 23275 23015 23798 22801 23206 22720 23580 23424 23376 22993 
21485 22528 21780 21961 21429 22184 22167 22252 22559 22450 22546 22389 21992 22118 21605 21857 21916 22304 21792 22966 22157 22799 22241 22211 21710 21987 21479 21789 22160 22489 22345 22912 22005 22084 21557 21992 21792 22401 21796 22832 22000 23057 22086 22716 21818 22094 21237 22271 21506 22324 22069 22470 22209 22859 22049 22217 21432 22103 21512 22746 21747 23073 22014 23064 21962 22605 21588 22118 21240 22361 21639 22301 22017 22436 22315 22856 22141 22556 21496 22053 21457 22061 21623 22535 21653 22850 22151 22950 22130 22506 21784 22147 21492 21897 21468 22192 21784 22192 22230 22407 22475 22574 21700 21921 21504 21991 21357 22583 21891 23287 22373 23486 22199 21656 20964 21211 20728 21580 21940 21811 23299 22806 23497 23145 22391 22095 21129 20956 20908 21024 21496 21594 21448 22973 22368 23840 22752 22360 21536 21212 20601 21241 21333 21653 22272 21760 22873 22053 22768 22295 22005 21623 21719 21671 21895 22102 22177 22467 22508 22461 22490 22070 22184 21595 22007 21273 22465 21799 22875 22151 22768 22089 22162 21455 22059 21616 22372 22191 22536 22372 22696 21944 22065 21359 22075 21769 3082 3795 3317 4823 3567 4237 4557 22487 21885 22168 21829 22368 21006 21984 21303 21407 20114 21289 20673 21074 19848 21263 20699 20678 19844 21219 19912 20177 20498 20538 19516 20821 19974 20149 19984 20503 19520 20375 19943 20133 19603 20609 19605 20080 20045 20489 19434 20509 19725 20019 20006 19889 19639 20440 19292 20236 19845 19444 19656 20240 18847 19242 20512 19667 19117 20523 18695 19737 20006 19063 19426 20421 18752 19257 20343 19371 19196 20559 19023 19731 20139 18848 19584 20144 18419 20700 19686 18624 20359 19712 18495 19563 20213 18851 19494 20103 19761 19991 20231 19387 20050 19881 19833 19727 20103 19306 20287 19909 19690 20043 20020 19367 20397 19571 19660 20224 19979 19504 20709 19573 20092 20228 20154 19488 20561 19917 19971 20240 19824 19753 20749 19350 20305 20168 20140 19952 20695 19332 20419 19984 19943 20036 20485 19381 20572 19272 20347 19626 20073 19797 20410 19200 20566 19666 20029 19815 20314 19315 20387 19591 19927 20009 20176 19230 20885 19431 20136 20291 20341 19155 20728 19639 20032 19890 20354 19221 20865 19587 19915 20197 20403 19225 20928 19485 20324 20337 20301 19281 20812 6659 7857 8576 8752 8777 10200 9019 10581 9941 23186 23692 23625 22757 23264 21991 22218 21908 21907 21693 21760 20748 22080 20938 21376 21489 21072 20925 21755 20019 21580 21568 20275 21277 21340 19575 21563 20007 20460 20805 19563 21185 20242 19437 22264 19881 21389 21399 19867 21005 20949 19831 21195 19127 21453 19824 19479 21994 20249 20554 21777 19364 21405 19683 20359 20395 19744 21144 20212 20931 20573 20219 20580 20325 20743 20424 20194 21056 20302 20897 20224 20844 20200 20480 20663 20133 20285 20284 20715 20535 20434 20558 20535 20669 19887 21102 19957 21020 19697 21141 20564 20846 20599 20311 20394 20366 20078 20677 19763 21326 19841 21104 20068 20882 20058 20394 20583 20848 20293 20964 19908 20785 19731 20883 20172 20608 20651 20608 20320 20856 20059 20849 19728 21437 19798 20971 20356 20449 20395 20788 19948 20984 19741 21147 20587 20907 20421 20605 20292 20460 20337 20910 19746 21315 19349 20972 20633 20412 20329 20492 20269 20695 19955 21299 19860 21048 20002 21041 20154 20661 20742 20466 20676 20572 20504 20685 20079 21200 19756 20972 19911 20522 20250 20008 21600 20079 20848 20344 20617 20329 19761 21907 9780 12624 11597 13288 12650 12318 15176 13191 14838 13763 24621 23456 22381 24537 21907 23215 22241 21620 21645 20480 22822 21184 21297 22600 20363 21497 20900 21511 21316 21021 21853 20492 21513 20649 21625 20861 21070 21259 20839 21143 20689 21400 21100 20771 21723 20480 21571 20788 20943 20912 20793 21157 20870 20501 21698 20337 21429 20504 21176 20711 20882 20974 21008 20471 21690 20334 21613 20491 21216 20507 20714 20928 21092 20466 21539 20101 21724 20496 21032 20458 20778 21089 21281 20531 21665 20054 21476 20304 21248 20525 20964 20866 20978 20289 21840 20311 21459 20870 20771 20804 20925 20695 21025 20123 21952 20341 21015 20984 21160 20878 21381 20506 21314 20192 21745 19941 21198 21101 20900 20912 21176 20308 21591 20419 21409 20681 20567 21144 21473 20727 21650 20235 21575 20471 20629 20917 20741 21050 20915 19780 22360 20375 20862 21852 20111 21698 21210 19837 21504 19641 21797 20333 20321 22160 20271 21526 21627 19810 21656 20740 20375 21256 19740 21428 20631 19675 22681 20271 21344 22072 20271 21322 20680 21017 20903 20770 21218 20935 20610 21682 20871 21227 21271 20817 21084 21355 20443 21413 20583 21267 20772 20887 15143 15795 15497 17179 16245 17288 17239 17093 17569 24384 22867 23507 22144 22883 22039 21964 21957 21995 21056 22422 20568 21486 21581 21950 21016 22390 20815 22120 21030 21359 21219 21671 20873 21784 20771 21351 21110 21220 21072 21600 20327 22154 20697 21269 21399 21669 20492 22175 20732 21595 21473 21419 20873 22167 20716 21795 21047 21386 21025 22113 20581 21864 21226 21248 21221 21721 20552 21698 21302 21430 21149 21796 20597 21734 20908 21264 21195 21184 20954 21561 20513 21704 20849 21033 21379 21357 20541 22372 20909 21216 22375 20774 21413 22203 20126 22220 21598 20359 21919 20940 20119 21897 20304 21146 21384 20134 21819 20930 19771 22869 20027 20482 22871 20865 19968 22891 20795 20111 22807 20789 21471 21551 21224 21305 21928 20912 21262 21591 21109 21424 21735 20810 21688 21175 21026 21499 21603 20745 21752 21178 21184 21404 21707 20731 21712 21090 21105 21395 21525 20693 21921 21155 21195 21399 21600 20761 21809 20790 21524 21237 21495 20947 21866 20888 21168 21281 21615 20799 21857 20750 21629 21103 21335 21037 21732 20654 21660 21037 21376 21162 21935 20565 21785 21034 21469 20933 21796 20521 21895 20976 21219 18023 19090 18344 19129 19044 19699 18641 20315 19324 19747 22784 23032 21445 22671 21944 21779 21682 22519 20850 21709 21999 21772 20962 22369 21136 21397 21659 21673 20766 22208 21408 21549 20657 22092 21344 20964 21792 22178 20253 22417 22055 20565 22218 22157 20361 22440 22509 20743 21697 22909 20435 21991 22487 20814 21468 22940 20759 21707 22602 20964 20484 23053 20224 20502 22836 21105 21157 21879 21556 21021 22298 21171 21379 21831 21504 21074 21977 21376 21244 21960 21489 21085 22226 21124 21563 21780 21671 21232 22340 21061 21719 21741 21543 21325 22154 21025 21840 21728 21776 21159 22324 21024 21564 21585 21272 21008 22455 21240 21757 21671 21832 20962 22437 21095 21483 21781 21726 20818 22338 21046 21471 21639 21687 20800 22423 21005 21439 21521 21878 20760 22400 20944 21460 21632 21600 21084 22496 21171 21686 21673 21834 20857 22519 20833 21828 21617 21785 21365 22338 20893 22241 21520 21451 21513 22016 21149 22029 21815 21433 21625 21981 20805 22165 21104 21774 21392 21399 21067 21941 20924 21790 21905 21954 20332 22307 21257 20742 22208 21632 20426 22548 21288 20844 22089 22120 20560 22449 21504 20672 22149 21974 20363 22593 21720 20640 22272 21857 20530 22368 21276 21052 22098 21418 21516 21703 21647 21181 21968 21546 21556 21521 21366 21676 21681 21106 22112 21415 21431 21718 21769 21065 22244 21176 21587 21967 21761 21230 22377 21157 21722 21824 21740 21064 22515 21319 21732 21904 21740 21201 22492 21064 22231 21824 21768 21280 22517 21252 21943 21892 21927 21385 22467 21157 22124 21789 22048 21256 22597 21165 21735 21749 22360 21117 22488 21209 21527 21713 21883 20935 22565 21159 21754 21831 22016 20944 22453 21187 21563 21891 21655 20945 22474 21184 21664 21942 21309 21366 22446 21252 21937 21874 21835 21497 22457 21099 22128 21927 21832 21492 22656 20894 22344 22202 20839 22144 22350 20572 22776 21498 20907 22457 21843 20460 22338 22911 20879 22124 22723 20544 22509 22240 20775 22452 22088 20620 22582 22272 20692 22413 21945 21592 21851 22229 21168 22114 21745 21446 21857 22350 21385 22006 22053 21491 21497 22481 21391 21877 21920 21777 21528 22377 21328 21989 21945 21740 21344 22549 21062 21814 21772 21872 21013 22466 21303 21524 21783 21959 20899 22423 21257 21959 21276 22359 21280 22117 21538 21840 21543 22343 21275 22219 21645 22137 21120 22720 21513 21841 21846 22176 21316 22363 21483 22069 21592 22106 21433 22476 21061 22597 21405 21894 21820 22177 21105 22666 21500 21750 21937 22134 21243 6012 7999 9786 11119 11683 11426 13175 12817 13289 13291 28969 27131 26834 26176 25147 24137 25309 23784 23479 24501 23864 22496 24213 24085 22393 23408 24252 10414 12677 14552 13483 14944 16697 14814 15670 17842 28288 26732 28393 25835 24760 25121 24949 24605 23554 24461 23726 23500 23665 23813 23003 23260 23403 22937 13629 15782 15728 16423 17033 17736 17193 18028 18202 27630 26025 26171 25432 25034 23852 24754 23520 23445 23101 23878 22934 23036 22976 23841 22288 23019 16794 17432 17125 19092 18095 18783 18547 20005 19025 19616 25829 25578 23760 24448 23932 23733 22533 24037 22734 23005 22377 23432 22512 22691 22493 23301 22229 19581 19901 20400 19501 21379 20188 20679 20442 21272 20344 23872 23389 23991 22705 23169 23085 22826 21975 23021 22347 22602 21957 22923 22326 22500 21970 23144 22071 22151 22098 22507 21675 22208 22480 22897 21016 22762 23635 21728 20932 23700 22452 21841 20997 23098 23251 21660 21766 23887 21431 20851 22688 22391 21624 21077 22400 23648 21367 21201 23079 21751 20919 22122 22469 21703 22085 22307 22745 21895 22222 22547 22092 21634 22685 21987 21828 21923 22419 21734 21984 22078 22516 21493 22297 22419 22019 21400 22429 21997 22194 21377 22613 22032 22161 21709 22877 21628 22020 21941 22469 21716 22075 21837 23009 21403 22252 22198 22281 21299 22569 21794 22261 21477 22422 22304 22473 21258 22615 21655 22520 21360 22723 22167 22328 21188 22245 21947 22793 21587 22437 22231 22098 21323 23114 21492 21925 21396 22757 21910 22288 21772 22840 21672 21850 22155 22202 21497 22053 22041 22816 21629 22007 22247 22241 21300 22048 21958 22523 21416 22309 22585 22685 21287 22704 21720 21213 20748 22854 23008 21418 21778 23746 21761 20921 22893 22095 20663 21765 22607 22464 20816 22760 23436 21810 20519 23029 21734 20873 21256 22598 21549 21159 22903 22212 21744 21891 22710 21725 21767 22029 22346 21611 21885 22320 22365 21650 22134 22435 21909 21398 22484 21920 22037 21442 22607 21894 21825 21624 22731 21648 21936 21637 22396 21497 21813 21873 22695 21440 21964 22019 22406 21447 22014 21866 22829 21429 22157 21984 22359 21241 21968 21713 22789 21484 22039 21589 22529 21507 22179 21824 22972 21717 21967 21802 22545 21600 22032 21508 22789 21545 21794 21425 22619 22088 22261 21186 22792 21655 22336 21276 22396 22149 22187 21387 21882 22039 22745 21707 21875 21796 22528 21937 21985 21587 22808 21638 21931 21401 22576 22193 21803 21250 21862 21997 22853 21425 21529 22467 22173 21104 21050 22424 23563 21065 20799 22391 22391 21829 21084 22053 23696 21496 21383 20855 22854 23264 21543 20901 23303 22004 21804 20823 22631 23353 21451 21768 22216 22321 21722 21783 21993 22714 21724 21702 21703 22277 22030 21728 22091 22688 21735 21776 21853 22491 21803 21947 21920 22786 21697 21960 21523 22513 22117 22246 21338 22539 21767 22349 21331 22471 22112 22304 21335 22204 22033 22519 21391 22362 22193 22267 21132 22369 21824 22405 21380 22551 22135 22260 21229 22287 21991 22627 21365 22234 22100 22248 21385 21943 21903 22795 21397 21952 21811 22436 21920 22372 21120 22480 21904 8932 9533 11639 12431 13223 12656 14115 14351 15289 29412 28928 28026 27414 25984 25536 13332 15453 15033 15920 16161 17589 17635 17591 16941 29618 29404 29704 26670 25473 24576 16751 18401 17275 16605 18186 19613 20342 18703 18565 18337 28992 28487 25968 24151 24960 19725 20488 18795 18629 19988 21175 21337 20044 20136 20814 26966 25714 25146 24408 24885 24289 21350 20877 21085 21504 21895 21943 21664 20983 21731 24764 25056 23683 23783 22907 23706 23585 23506 22726 23015 22519 23529 22889 23571 22470 22626 22582 23463 22826 23146 21920 23149 22440 23310 22250 22485 22348 23165 22105 22535 22027 23312 22149 23080 21776 22204 22236 22949 22508 22651 21684 23104 22294 23158 21615 22459 22016 23000 22376 22397 21775 22871 22061 22987 21651 22635 22275 22789 21843 22580 21773 23112 22189 22839 22027 22281 22495 22653 22074 22234 21817 22971 22046 22413 21549 22608 22408 22554 21955 22224 21681 22736 22292 22780 21764 21710 22483 22722 22461 21577 21218 23367 22314 22247 21002 22371 22904 22619 22399 21495 21213 23515 22136 21989 21137 22019 23401 22040 21303 21202 22586 23745 21623 22089 21219 
