# Supplementary material for: An Active Feature Selection Strategy for DWT in Artificial Taste
Source: Hindawi journal article supplement (doi:10.1155/2018/9709505), 2018-01-01
Supplement: f1 [file 9709505.f1.zip › blackTea-low-2.txt]

43465 43584 42502 40320 50 12203 16993 20301 20144 21207 20875 22281 22081 22323 22007 22442 21642 22520 22233 23174 21906 22332 21891 22832 22628 22633 22170 22544 22065 22920 22409 23092 22159 22393 21861 22610 22437 22822 22753 22731 22259 22649 22008 22596 22407 23191 22465 23117 22249 22711 22036 22432 21922 22384 21979 23000 22970 23096 23364 22568 22532 22242 21346 21829 21804 22521 22920 23785 22849 23616 21980 22162 21994 21459 21667 21924 21902 22924 23280 23174 23599 22865 23344 22181 22148 22116 21404 21829 22317 23054 23101 23905 22625 23853 22273 22945 22124 21611 21626 21841 22465 22951 23488 22977 23554 22096 22597 22150 22488 22103 22737 22666 22932 22727 22611 22224 22506 22157 22656 22714 23001 22513 22968 22393 22317 22061 22717 22722 22785 22776 22629 22173 22343 22133 22492 22565 23201 22324 23112 22261 22563 21948 22512 22253 22956 22752 22896 22695 22744 22191 22639 21797 22513 22342 23138 22465 23214 22089 22674 22055 22547 22220 23074 22667 22809 22424 22924 21825 22580 22217 23125 22444 23328 22149 22971 22147 22595 21784 22903 22604 23144 22544 22749 21986 12775 16544 18798 19219 20485 19849 20901 19921 20624 19968 28904 25284 24844 23392 23985 23253 23564 22876 23098 22256 22845 21977 23047 22676 23531 22663 23454 22199 22893 22126 22584 22140 23081 22772 22881 22355 22776 21922 22620 22150 23258 22400 23468 22184 22968 22112 22562 21953 23027 22616 23066 22503 22738 21988 22630 22055 22640 22483 23271 22301 22800 22176 22573 22065 23122 22756 22770 22449 22872 22008 22592 22308 22907 22625 23221 22186 22786 22232 22511 22158 22945 22754 22771 22440 22676 21799 22427 22327 23010 22686 23564 22236 22697 22103 21798 21910 23105 23530 22864 22734 22321 21921 22029 21620 22392 23062 23972 22222 22349 21988 21555 22176 22958 23566 22740 22981 22108 21366 21779 22501 23600 22785 23176 22087 21557 21642 22177 22971 23168 23414 22172 21414 21679 22448 23471 22784 23119 21693 21730 22295 22340 22884 22516 23225 22169 22578 22097 22593 22668 22874 22726 22995 22167 22587 22554 23037 22481 22812 22362 22384 22352 22912 22807 22653 22260 22368 22063 22583 22589 23223 22196 22539 21992 22775 22742 22900 22676 22052 22042 22320 22415 23201 22397 23078 22134 22566 22272 23068 22582 22737 22089 22577 17288 20248 20205 21344 20609 21179 21002 21957 21572 30688 25345 24429 22832 23527 22840 23721 22447 23074 22156 22893 22217 23182 22750 22919 22424 22791 21906 22793 22544 23333 22389 23100 22304 22705 22016 23088 22728 23083 22480 22774 21927 22664 22210 23063 22540 23299 22165 22829 22006 22477 21970 22740 22544 23063 22616 22780 22153 22864 21901 22756 22435 23378 22510 23303 22061 22992 22177 22598 22161 23059 22776 22717 22247 22662 21917 22665 22555 23196 22444 22980 22140 22458 21946 22889 22624 22898 22636 22659 21987 22441 22274 23019 22502 23190 22058 22562 21929 22612 22317 23036 22929 22631 22148 22172 21889 22820 22895 23810 22208 22375 21747 21449 21559 22529 23165 23124 23473 22163 21532 21689 21938 23171 23088 23763 22613 23143 21893 21564 21640 22256 23142 23141 23543 22215 21856 21831 21881 23115 23009 23847 22071 23005 22145 21504 21760 22666 23264 22592 22938 22304 22486 22119 22468 22451 22960 22767 22631 22538 22648 22158 22327 22340 22700 22736 23076 22458 22928 22344 22375 22128 22392 22264 23044 22725 22700 22396 22548 21975 22548 22385 23168 22621 23040 22248 22790 22136 22502 21971 22653 22422 23025 17316 20432 20758 21424 20962 21776 21650 22531 21761 22565 25189 23895 22889 23101 22374 23244 22834 23168 22560 22829 22299 22829 21881 22677 22221 23075 22439 23344 22076 22827 22151 22548 22207 22850 22451 23113 22656 22845 22336 22724 21945 22551 22135 23081 22391 23325 22104 22816 22016 22518 22063 22539 22145 23035 22664 22994 22357 22785 21996 22483 22296 23194 22400 23245 22328 23312 22008 22840 22085 22657 22212 23194 22728 22954 22529 22793 22119 22579 21926 22701 22529 23232 22377 23217 22127 22521 22023 22522 22336 22933 22727 22868 22624 22585 22280 22576 21946 22426 22422 23048 22541 23320 22247 22792 22327 22496 21968 22704 22300 22892 22986 22858 22692 22892 21804 21862 22024 22732 22836 23970 22276 23040 22002 21543 21595 21752 22100 23201 23552 22967 22977 22325 21225 21801 22304 23512 22994 23658 22048 21744 21568 21528 21976 23144 23680 22443 22673 22248 21252 21816 22067 23079 23112 23845 22751 23642 21993 21948 21860 21477 22094 22693 23124 22479 23014 22251 22736 22049 22451 22156 22679 22473 22980 22884 22541 22631 22628 22009 22431 22413 22923 22567 23079 22226 22605 22208 22437 21904 22680 22511 22888 22666 20756 21383 22322 21537 22004 21666 22214 21990 22637 25742 24320 22791 23319 22353 22914 22157 22536 21899 22784 22698 23124 22604 22784 22149 22592 21885 22576 22260 23104 22336 23334 22181 23248 22101 22640 21939 22636 21912 22980 22599 23090 22601 22964 22688 22765 22229 23051 21856 22500 21999 22672 22262 23259 22508 23411 22212 23286 22007 22960 22208 22595 21994 22604 22130 22999 22343 23097 22581 23014 22649 22625 22364 22726 22017 22740 21768 22583 22205 23073 22490 23296 22183 23297 22151 23065 22039 22756 22134 22457 21954 22446 22092 22834 22560 23104 22753 22932 22597 22732 22577 22660 22294 22521 21986 22528 22081 22440 22059 22597 22340 23005 22433 23174 22504 23216 22359 23192 22384 23036 22219 22856 22422 22297 22082 21729 21878 21497 21512 21616 21514 21562 21549 21609 21689 22362 22196 22832 22896 23192 23720 23104 23735 22566 23312 22167 22981 22092 21927 22103 21479 21760 21384 21923 21943 22838 23170 23785 23155 23760 23047 22883 22564 22560 22880 22032 22564 22054 22393 22221 22592 22680 23005 22652 23032 22490 23151 22344 22671 22072 22311 22101 22378 22021 22497 21978 22642 21970 22492 22192 22873 22417 21211 21907 22507 22339 22838 22342 22724 22358 22705 22438 23618 22821 22836 22570 22836 22275 22806 22160 22827 22064 22760 22005 22703 21865 22697 21824 22565 21970 22576 22071 22888 22297 23080 22457 23215 22464 23188 22345 23269 22194 23116 22144 22785 22216 22544 22028 22537 21812 22704 21802 22493 22093 22873 22333 22964 22550 22984 22680 22973 22584 22806 22362 22918 22520 22807 22288 22731 22183 22630 21901 22753 21916 22404 22003 22402 21928 22423 22278 22565 22284 22732 22503 23088 22588 23209 22331 23118 22340 23061 22194 23072 22333 23047 22359 22976 22188 22999 22170 22567 22120 21904 21719 21623 21833 21420 21570 21592 21466 21809 21864 22608 22386 22936 23274 23292 23652 23178 23425 23223 23778 22981 23586 22511 22894 22229 22384 22112 21573 22010 21316 21717 21528 22000 22533 22497 22923 22733 22951 22768 22757 22840 22771 22784 22600 22743 22572 22528 22560 22366 22570 22600 22599 22192 22866 22138 22453 21898 22471 21971 22464 22284 22482 22288 22680 22519 23040 22444 23241 22442 23254 22338 23215 22164 23035 22215 23006 22098 22759 21991 22488 21826 22467 21866 22675 21949 23054 22158 22944 22368 23040 22488 23021 22667 22741 22528 22728 22392 22886 22288 22711 22250 22760 22028 22728 22160 23144 21983 22821 21911 22649 21850 22470 21997 22460 21997 22578 21924 22672 22228 22896 22261 23092 22455 23165 22412 23264 22393 23175 22185 23093 22137 22763 22233 22651 22148 22336 22116 22428 21945 22530 21923 22480 22080 22634 22088 22727 22160 22807 22482 22854 22224 22913 23002 23051 23316 23170 23667 22887 23449 22349 22818 22210 22514 22464 21601 22263 21850 22144 21299 21870 21202 21717 21900 22330 22713 23447 23053 23836 22755 23586 22093 22529 22089 22328 22528 21966 22404 22062 22489 22275 22697 22469 22947 22549 23016 22610 23129 22348 22690 22039 22468 22017 22318 21952 22481 22243 22794 22141 22690 22406 22898 22656 22946 22665 22790 22633 22828 22450 22716 22118 22941 21940 22680 21870 22686 21836 22650 21799 22493 21952 22742 22323 23156 22392 23256 22322 23127 22060 22917 22407 22586 22137 22457 21849 22480 21830 22826 22240 23101 22509 23076 22466 22826 22554 22695 22430 22663 22215 22736 21897 22440 21945 22769 22223 23308 22342 23089 22374 23335 22229 22977 22086 22598 22144 22368 21905 22581 22168 22630 22389 22948 22716 22940 22737 22789 22584 22641 22572 22580 22348 22062 22136 22464 21841 22465 21768 22075 21352 21805 21692 22231 22725 23425 23060 23809 22443 23468 22221 22984 21928 14966 17760 18196 19143 20482 20844 21266 21728 20520 35949 27142 23927 23334 22432 22841 22792 22589 23191 22624 23000 22930 23055 23020 22679 22699 22697 22400 17897 19492 20544 20729 21393 21351 22087 21449 22178 30315 25896 23729 23554 22664 22954 22425 22804 22212 22823 22326 22986 22745 23160 22771 23159 22716 13632 19340 21058 20763 21561 21269 21901 21447 22085 21740 27633 24098 24181 22876 23744 22333 23253 22199 23116 22252 22684 21980 22699 22013 22752 22093 22986 18125 21517 21766 22300 21859 22321 21732 22319 21463 22257 24140 23523 22588 23004 22727 23371 22665 23339 22464 23237 22149 22809 22400 22375 22001 22495 22099 21154 21916 22496 22294 22764 22731 22652 22912 22332 22169 23146 21746 22098 21441 21804 21524 22045 22208 22852 22919 23442 23149 23840 23001 23895 22480 23357 22029 22578 21562 22176 21768 22046 22034 21484 22302 22001 22457 22116 22388 22324 22519 22515 22621 22309 22546 22456 22832 22515 22900 22588 23057 22528 23187 22466 23210 22560 23161 22455 23235 22254 23187 22081 23102 22138 23123 22202 22892 22087 22966 22001 22832 22049 22807 22546 22739 22098 22562 21942 22517 21912 22503 21911 22475 21900 22541 21928 22832 22018 22891 22094 23013 22516 22978 22281 23056 22482 23048 22617 23016 22624 23088 22552 23047 22581 23095 22540 23143 22512 23031 22393 23076 22632 22977 22717 22884 22729 22981 22692 23021 22719 22963 22822 22899 22807 22737 22701 22663 22543 22633 22539 22711 22848 22520 22830 22336 22543 22258 22101 22187 23105 22208 22733 22305 23088 22361 23000 22179 22807 22240 22496 21584 22037 21962 21911 22290 22852 22152 22579 22091 22573 21906 22633 22324 22567 22241 22365 22326 22402 22266 22399 22201 22211 22073 22386 22038 22539 22194 22752 22311 22877 22549 22980 22753 22983 22807 22933 22760 22967 22743 23035 22753 22946 22628 22858 22657 22772 22464 22697 22372 22628 22192 22690 22315 22743 22222 22717 22089 22693 22032 22780 21910 22702 21831 22672 21936 22693 21866 22771 21747 22686 21800 22627 21835 22437 21924 22423 21831 22500 21991 22503 22052 22485 21965 22733 21992 22494 21892 22560 21920 22488 21966 22494 21824 22513 21991 22284 21904 22344 21946 22375 21929 22353 21952 22468 21909 22461 21904 22462 21911 22504 21862 22409 21862 22439 21917 22416 21902 22272 22032 22614 22417 22314 23269 22370 23317 22564 23346 22199 23207 22417 23276 22551 23372 22528 23717 23004 23656 22812 23760 23256 23699 23122 23424 22626 23065 22576 22919 22484 22656 22407 22521 22412 22523 22248 22437 22235 22471 22272 22631 22206 22428 22136 22454 21911 22290 21960 22447 21959 22297 21913 22448 21902 22563 21895 22506 21833 22602 21838 22656 21793 22619 21824 22741 21803 22696 21943 22868 21980 22631 22007 22720 22353 22793 22472 22730 22597 23026 22496 23091 22528 23053 22232 22893 22144 22765 21965 22723 21997 22613 21992 22393 21969 22492 21783 22467 22181 22733 22314 22870 22058 22968 22075 23214 22200 23169 22421 23050 22476 23096 22425 22779 22293 22653 22157 22476 22027 22366 21954 22375 21877 22587 21973 22678 22557 22562 23001 22624 10877 18077 20151 20520 21044 20963 21288 21445 21129 21126 29770 25113 23244 22492 22656 22441 17176 20423 20485 22217 21484 22819 21880 22860 22211 31002 25238 23626 23197 22805 22942 17690 20643 20842 21676 21658 22189 21703 22440 21781 22592 25178 24408 23252 23527 22890 18464 20930 21685 21454 22016 21559 22272 21879 22295 22065 25296 23584 23588 22657 22980 22171 21715 21676 22432 21900 22886 21952 23098 22254 23157 24118 23462 22292 22823 22295 22905 22557 22850 22733 22974 22741 23148 22444 22887 22066 22753 21904 22709 21554 23255 22469 23256 22504 22800 22026 22492 21882 23222 22293 22806 22653 23165 22595 23085 22172 22859 21915 22435 22340 22636 22182 22988 22272 23098 22438 23125 22573 22962 22300 22480 21837 22630 22230 22487 22568 22730 22944 22915 22976 22965 22002 22288 21508 21466 21752 22096 21832 23109 22279 23815 22900 23766 23108 23261 22639 22110 21364 21904 21724 22596 23083 22355 23659 23233 23369 22929 22070 21638 21709 21955 22498 22357 22637 22790 22900 22573 22678 22045 22364 22250 22502 22278 22952 22376 23120 22608 22631 21869 22816 22147 22533 22665 22758 22574 
22579 21559 22077 21996 21762 21724 21971 21685 22470 21031 22574 21874 21668 22909 21360 21485 22793 20642 21807 21667 21392 22493 21102 22317 22442 21100 23105 21696 21083 22915 21879 21104 23245 21132 21674 23043 20866 21933 21908 21464 21719 21303 22109 21688 22520 21479 22324 21448 21932 21366 21881 21316 22096 21747 22302 22071 22159 21744 22099 21366 21945 21288 22000 21605 22517 21763 22637 21600 22455 21543 21980 21160 21880 21254 22211 21873 22472 22082 22351 21851 22085 21696 22462 21364 21920 21344 22125 21716 22651 21690 22631 21388 22365 21395 22267 21399 21961 21187 22264 21971 22393 21997 22330 21750 22400 21278 21836 21508 22333 21911 22679 21612 22631 21504 22126 21295 22229 21686 22448 21968 22181 21615 22227 21267 21847 21587 22596 21709 22615 21577 21869 21296 22205 21833 22321 22197 22146 21861 21865 21340 21753 21606 22182 21988 22518 21770 22430 22096 21876 21312 21891 21525 22221 22192 22309 21911 22147 21362 21819 21360 22321 21769 22770 21722 22421 21557 21300 20781 22009 22471 22375 22829 21760 21508 21447 20644 21345 21780 22998 22120 23100 21403 21283 20859 2736 7341 10516 12078 12081 13235 12567 12555 12922 12798 31766 28928 27607 25917 25925 24055 24508 22706 22083 21655 21831 22244 23063 23460 22413 23356 21786 21410 21513 20999 21512 22400 22423 22089 21945 22176 21410 22069 21916 22530 21944 22599 21824 22219 21735 21680 21753 22091 22375 22197 22105 21761 21472 21769 21737 22033 21981 22614 21776 22103 21369 21991 21918 22380 22220 22170 21816 22055 21496 22007 21895 22548 21982 22487 21609 22004 21533 21964 21664 22375 22087 22101 21728 22119 21426 22075 21831 22554 21655 22568 21587 21971 21408 22137 21557 22545 21982 22195 21663 22181 21397 21967 21365 22467 21678 22704 21520 22106 21229 22016 21687 22365 22150 22231 21719 22161 21175 22160 21605 22696 21603 22363 21545 22043 21405 22336 21895 22515 21664 22250 21244 22029 21728 22684 21544 22553 21466 21869 21289 22317 22024 22310 21955 22098 21240 21827 21504 22651 21718 22784 21546 21878 21493 22588 22092 22307 21558 22048 21281 22340 21874 22714 21611 22024 21428 22109 21717 22325 22157 22077 21346 21833 21717 22502 21755 22384 21703 21799 21552 22291 22075 22184 21797 21973 21419 22162 21913 22612 21625 21982 21121 4121 10029 13118 14494 14788 14585 15891 16695 17926 16672 32640 27765 25361 24407 24940 24760 22886 22597 21941 21547 22769 22551 23628 21801 22297 21374 21222 21395 22674 23008 22179 22235 21497 20748 21575 22310 23321 21875 23099 21717 21081 20864 21762 22636 22497 22829 21608 21275 21168 21819 21320 22207 22054 22263 22188 22153 21591 21880 21490 21941 22112 22436 21850 22528 21713 21833 21621 21832 21925 22199 22444 22061 21697 21914 21614 22054 21868 22710 21703 22390 21704 21885 21454 22194 22241 22259 21960 21671 21384 21927 21878 22581 21750 22578 21504 21898 21399 22183 21911 22547 22113 22099 21447 21858 21614 22564 21829 22685 21528 22065 21261 22105 21540 22407 21944 22389 21696 22233 21331 21855 21720 22647 21692 22679 21555 22317 21591 21864 21427 22320 22027 22344 21911 22679 21377 21974 21369 22570 21689 22487 21399 22058 21320 21931 21435 22312 22059 22232 21693 22204 21464 21803 21522 22572 21765 22832 21547 22264 21500 21867 21214 22202 21813 22548 22087 22272 21628 21932 21146 21918 21696 22236 21716 22697 21683 22177 21555 21754 21527 22241 22091 22373 21908 21959 21533 21889 21315 21793 21659 22503 21837 22452 11294 14994 15841 17158 17399 18595 18762 18853 19101 19322 27555 25338 23729 23637 23350 24115 22503 23258 21405 21472 21050 21188 21472 22311 22784 22621 23026 21648 21315 21455 20637 21611 22365 22724 22392 23393 21435 21989 21249 20928 21213 22219 22468 22599 23089 21597 21608 21320 20738 21073 21050 21751 22351 23293 21765 22177 21856 21385 21783 21888 22346 21927 22683 21744 22413 21978 21711 21447 21926 22057 22327 22289 21978 21967 22405 21566 21705 21600 22200 22038 22541 21874 22357 21504 21776 21272 22131 21904 22466 22183 22088 21923 21419 21484 21690 21460 22071 21975 22553 21943 22684 21494 22338 21426 21824 21483 22383 21895 22480 22165 22240 21690 22194 21352 21872 21677 22597 21831 22788 21413 22265 21383 21936 21319 22247 21779 22420 21958 22265 21744 22061 21169 22040 21737 22592 21639 22483 20833 21795 21280 22288 21760 22538 22047 22291 21496 22097 21220 22162 21607 22705 21594 22693 21329 22437 21639 21812 21316 22089 21627 22560 22158 22052 21783 21481 21220 22021 21415 22401 21831 22670 21687 22659 21511 22272 21431 21928 21378 22305 21971 22386 22004 22129 21530 21903 21370 22053 21683 22434 21790 22508 12993 16933 17824 18915 18816 19827 19747 20506 20372 20641 27456 25152 23499 23072 22217 22262 21860 22130 21901 22888 21892 22786 21657 21797 21116 21384 20950 22174 22589 22487 22960 21879 22055 21806 20855 21101 20819 21646 22236 22949 22132 23392 22016 22839 21351 21760 21257 20741 20960 21455 21931 22465 23008 22179 23113 21948 22583 21512 21543 21554 20620 20997 21139 21673 22312 23216 22518 23127 22016 22107 21987 21748 21916 21352 21809 21334 21952 21981 22561 22060 22422 21848 22119 21719 22094 21893 21760 21440 21760 21472 22097 21723 22314 22127 22261 22101 22125 21903 21971 21583 22435 21587 21874 21352 21720 21515 22151 21751 22202 21796 22717 21783 22600 21614 22383 21623 22385 21559 22192 21380 22136 21353 21795 21200 21991 21202 22072 21421 22193 21493 22373 21607 22278 21641 22452 21888 22391 22065 22437 22057 22083 21905 22192 21786 22025 21429 22213 21293 21797 21203 22053 21456 22213 21766 22663 21627 22643 21753 22636 21476 22489 21581 22043 21434 21917 21156 22131 21536 22242 21766 22631 22075 22326 21901 22295 21829 22112 21303 21976 21285 21883 21557 22112 21680 22285 21789 22499 21752 22405 21923 22656 21870 19383 19879 21159 20613 21528 20721 21632 20869 21648 25206 24064 23080 22737 21908 22221 21448 21505 21069 21320 20872 21404 20969 21087 20844 21101 21210 21797 21864 22391 22455 22640 22999 22454 23052 22432 22992 21936 22725 21559 21920 21661 21047 21376 20631 21088 20867 21549 21736 22280 21622 22065 22182 22586 22266 22298 22220 22157 22060 22023 21947 21723 22071 21861 21889 21821 21906 21472 21751 21458 21649 21389 21831 21807 22199 21528 21962 21683 22433 21900 22441 22017 22470 21871 22515 21539 22391 21537 22536 21430 22220 21541 22236 21871 22275 21480 22103 21307 21863 21348 21913 21133 22133 21332 22087 21297 22327 21690 22314 21840 22427 22023 22387 22086 22257 21905 22272 21948 22261 21921 22192 21816 22139 21464 22172 21240 22099 21248 21779 21421 22002 21482 22419 21699 22551 21815 22705 21637 22576 21479 22468 21435 22528 21500 22104 21732 22221 21432 21947 21303 21990 21583 21879 21331 21808 21392 21913 21346 22134 21740 22233 21912 22337 22051 22334 22177 22248 22077 22183 22045 22103 21941 22000 21687 22119 21747 21736 21208 21125 20885 21079 21015 21549 21705 22220 22218 23159 22379 22947 22338 23352 21974 23084 21257 22313 21429 22003 21178 21532 21363 21252 21212 20873 20917 21099 21053 20972 20842 20830 20871 20992 21767 21685 22008 21748 22308 21758 22095 21984 22423 22082 22359 21972 22481 21771 22480 21735 22280 21731 22139 21824 21934 21539 21856 21284 21685 21393 21923 21577 22131 21822 22121 21861 22368 21943 22439 22031 22360 21945 22444 22056 22305 22016 22291 21936 22322 21927 22187 21713 22109 21421 22085 21207 22132 21195 21863 21255 21772 21288 21945 21520 22299 21596 22625 21705 22736 21511 22700 21479 22504 20925 22065 21280 21927 21298 21719 21319 21960 21541 22509 21885 22514 21850 22383 21847 22257 21946 22051 21453 22074 21221 21707 21453 22020 21637 22364 21847 22683 21825 22479 21911 22605 21644 22457 21511 22250 21553 21966 21659 21895 21292 21745 21073 21753 21013 21404 20900 21488 21030 22020 22056 22528 22823 22349 23044 21869 22399 21591 21403 21453 20656 21110 20711 21104 21097 21728 21789 22666 22248 23178 21864 22976 21369 22171 21363 21993 21576 21520 21782 21403 21815 21691 22330 21871 22511 21952 22409 21928 22503 21774 22063 21562 21692 21346 21783 21536 22136 21738 22205 21894 22419 22151 22250 22064 22165 21929 22099 21601 22128 21415 21889 21280 21781 21322 22017 21370 21888 21265 22119 21621 22405 21705 22791 21559 22596 21381 22249 21826 22144 21458 21803 5927 10172 11398 13331 13522 14441 14285 14813 14282 35636 29914 27744 25411 24762 23693 23962 23093 23539 22386 23353 22123 22985 21794 22503 21750 22157 3522 10615 13097 15504 16075 17115 17219 17596 17545 17799 32567 28823 25923 24891 23592 23443 22601 22912 22390 22965 22325 23060 22211 23089 22071 23028 21655 9511 13129 15232 16388 17795 18599 18979 19283 19950 20417 30254 27712 24997 24595 23089 22893 22572 21767 21806 20971 21462 21464 21961 21560 22235 22485 22439 15008 17510 18692 19303 19859 19841 20192 20006 20220 20281 26810 24774 23904 23146 23369 22354 23032 21929 22569 22199 22156 21732 21963 21560 22385 21952 22572 18759 20297 20633 21242 21115 21221 20921 21870 20678 25722 23334 23192 22160 22846 21872 22541 21949 22651 21949 22841 21815 22747 21666 22649 21625 22413 21545 22007 21274 22040 21344 21994 21366 21932 21237 22016 21639 22396 21760 22416 21772 22405 21939 22507 21800 22471 22017 22422 22184 22439 22199 22237 22069 22241 21997 22001 22141 22028 21950 22055 21850 22027 21671 22153 21623 22042 21344 21822 21558 21787 21280 21608 21095 21571 20633 20928 20695 21104 20918 21408 21366 21302 21099 21592 21721 21840 21779 22359 22193 22837 22311 23235 22257 23118 22354 23245 22304 23092 22327 22158 22183 22166 22183 22168 22030 22249 22043 22375 22215 22288 22080 22278 22112 22185 22064 21982 21953 22086 22176 22264 22160 22023 22018 21994 22048 21659 22034 21556 22071 21452 22200 21491 21895 21420 22179 21360 22032 21276 22028 21411 22310 21428 22060 21430 22146 21431 21948 21292 22036 21398 22082 21312 21856 21115 21985 21257 22158 21305 22220 21291 21977 21319 22016 21267 21891 21174 21898 21299 21818 21272 22094 21368 22065 21504 22187 21591 22443 22006 22502 21812 22636 21792 22544 21688 22508 21619 22487 21495 22441 21605 22627 21528 22284 21543 22368 21657 22368 21723 21705 21231 21440 21261 21543 21127 21259 21359 21048 21240 21003 20860 20843 20720 20973 20807 20923 20704 20903 20837 20858 20913 20935 21089 21235 21152 21670 21610 21895 21377 21745 22128 21696 22165 21835 22129 22009 22213 21916 22191 21988 22115 21944 22211 21857 21761 21556 22023 21654 21968 21399 21974 21665 21961 21570 22039 21657 21941 21256 21789 21504 21935 21308 21733 21401 21864 21309 21849 21205 21999 21218 21965 21277 22007 21424 22323 21497 22477 21440 22516 21417 22107 21597 21781 21479 22185 21566 22292 21668 22187 21717 22209 21958 22105 21879 22249 22023 22225 22049 22387 21993 22558 21929 22390 21888 22477 21950 22531 21863 22311 21993 22263 21814 22214 21804 22157 21740 22030 21632 22235 21601 22208 21578 22030 21421 21993 21457 22084 21137 21838 21044 21492 20857 21318 20853 21065 20744 20864 20686 20817 20775 20765 21036 21008 21280 21748 21161 22400 21354 23143 21938 23331 22234 23105 22327 23010 22410 22382 22223 22452 22248 21822 21975 21570 21857 21434 21717 21375 21566 21481 21776 21633 21746 21685 22107 21659 22177 21599 22503 21833 22650 21673 22503 21943 22439 21883 22358 21831 22155 21607 22189 21704 21927 21356 21679 21308 22177 21389 22340 21596 3059 8774 11713 12821 13966 14202 15058 15126 15565 15591 33526 28940 26917 24795 24378 23094 11337 13965 16050 16482 17677 17193 18481 17754 18900 33025 29681 26519 25295 23815 23607 12263 16107 16928 18607 18215 19569 18911 20240 19403 32840 28241 26130 24835 24147 23515 15757 17837 19522 19433 20330 19854 20496 20197 20587 20446 27152 24535 24663 23337 23329 17960 19607 19777 20201 20124 20937 21485 21035 22305 21839 25895 24352 22990 21781 21687 21696 21988 22726 21639 23333 22246 23492 22517 23015 22223 21993 21285 21032 20992 21568 23104 22330 22725 21987 22348 21698 21940 21525 22061 21847 22145 22306 22260 22337 22318 22163 22024 21533 21780 21546 21944 21767 22213 21673 22501 21770 22615 21894 22489 21714 21961 21312 21969 21419 21852 21792 22274 21989 22257 22080 22447 21916 22292 21460 22151 21257 22009 21364 22299 21504 22508 21519 22626 21832 22666 21860 22338 21445 21968 21144 22229 21471 22109 21980 22282 22108 22424 21654 22161 21369 21836 21414 22191 21383 22726 21696 22591 21604 22064 21323 21945 21395 22116 21932 22159 22134 22455 21337 21815 21494 22095 21564 22499 21709 
21468 22120 21225 22010 21298 21828 21821 21559 21827 21905 21444 22291 21253 21804 21685 21543 21506 21808 21431 22116 21237 22073 21655 21668 21901 21732 21392 22357 21330 21829 21875 21650 21335 22217 21068 21847 21513 21684 21639 21510 21776 21841 21411 22327 21211 21911 21837 21672 21463 21796 21394 22124 21063 22098 21649 21782 21902 21648 21411 22297 21242 21702 21699 21539 21571 21691 21505 22112 21094 22075 21728 21568 21759 21971 21292 21872 22664 21260 21548 21083 21016 20935 20842 21010 21956 22203 22512 22704 21514 21932 21098 20626 21440 20556 21109 21159 21808 22279 22981 21911 22547 21177 21351 21122 20701 20905 21876 22151 21804 22056 21521 21691 21512 21431 21404 21908 22125 21860 21861 21847 21347 21510 21522 21720 21939 22119 21618 21783 21643 21383 21480 21872 22023 21895 21929 21705 21585 21606 21281 21684 21753 22083 21661 22023 21527 21750 21576 21442 21377 22144 21852 22074 21946 21739 21539 21600 21330 21655 21735 22152 21632 22114 21453 21764 21351 21717 21660 22085 21929 21909 21507 21796 21226 21657 21461 22016 21733 22304 21354 21869 21344 21601 21399 22085 14570 17112 17792 18375 18308 18950 18560 19176 19241 32059 25255 23975 22533 22809 21781 22163 21492 21701 21419 22160 21868 22018 21701 21829 21288 21777 21083 21639 21558 22167 21664 22163 21297 21552 21339 21806 21736 22272 21841 21895 21397 22295 21193 21752 21286 22016 21639 22337 21273 21874 21450 21705 21350 22071 21704 22077 21833 21724 21175 21639 21644 22187 21632 22088 21430 21595 21232 21840 21717 22108 21883 21783 21544 21703 21161 21597 21568 22163 21668 22151 21371 21592 21270 21697 21628 22121 22080 21841 21522 21708 20854 21207 21511 22385 22000 22770 21063 21199 20914 20985 21048 22126 22506 22433 22244 21753 20632 21099 21442 22693 21980 22475 21227 21152 20939 21292 21792 22649 22720 21536 21098 21316 20971 22246 22400 22868 21586 21796 21162 20896 21531 22589 22739 21563 21165 21223 20894 21783 21946 22085 21626 21713 21382 21284 21536 21763 22214 21680 21741 21458 21491 21896 21972 21875 21592 21497 21483 21554 21999 21748 22000 21515 21479 21362 21927 21916 21938 21824 21578 21227 21607 21837 22165 21563 21649 21346 21551 21721 22024 21961 21686 21318 21618 21314 22095 21696 22067 21840 21488 21195 21971 13461 18173 18927 19610 19700 20437 20091 20696 19911 20414 25796 23913 22753 22662 21994 22016 21232 21687 21648 22187 21696 22169 21355 21638 21142 21879 21805 21981 21792 21770 21256 21549 21362 22149 21623 22236 21266 21871 21300 21569 21296 22136 21835 21762 21429 21565 21044 21604 21560 22103 21709 22282 21364 21788 21296 21653 21168 21940 21612 22056 21746 21787 21409 21472 21109 21650 21510 22144 21591 22212 21384 21542 21223 21895 21837 22052 21728 21685 21222 21750 21237 21853 21782 22262 21369 21793 21416 21632 21459 22146 21902 21796 21562 21651 21103 21619 21660 22237 21616 22076 21442 21376 21065 22064 22379 22045 21908 21399 20699 21137 21782 22768 22354 22903 21409 21704 21114 20922 21259 22519 22759 21737 21853 21292 20613 21186 21025 21838 22376 22954 21489 21824 21191 20716 21027 22119 22752 21863 21729 21280 20594 21088 21066 22052 22400 22887 21282 21254 21541 21330 21573 21785 22209 21728 21826 21504 21417 21329 21488 21576 21868 22118 21697 21787 21635 21363 21497 21345 21749 21888 22116 21752 22026 21567 21528 21345 21739 21696 22055 21913 21719 21545 21611 21297 21521 21626 22069 21888 22232 21453 21938 21851 17850 19281 20480 20663 20992 20973 20918 20568 20956 27335 23794 22633 22784 22045 22310 21410 21780 21430 21605 21347 21923 21760 22070 21815 21810 21468 21704 21143 21612 21476 22103 21716 22240 21475 21957 21856 21528 21095 21820 21580 22185 21752 21885 21514 21656 21150 21673 21521 22240 21735 22340 21597 22215 21363 21724 21141 21801 21703 22037 21957 21726 21497 21769 21243 21806 21191 21602 21532 22294 21442 22105 21293 21600 21268 21553 21282 22089 21835 21975 21815 21626 21283 21728 21297 21747 21577 22246 21523 22101 21766 21525 21353 21545 21376 22010 21822 22055 21863 21747 21581 21612 21168 21532 21449 22041 21718 22247 21513 22113 21347 21536 21158 21425 21233 22323 22510 21900 21892 21497 20636 21100 21102 22023 22216 22985 21888 22541 21120 21144 21105 21120 21645 22646 22784 21573 21312 21339 20612 21371 22189 23136 22131 22660 21073 20928 20795 21522 22068 22538 22768 21781 21746 21456 20926 21220 20668 21330 21916 22472 22193 21930 21557 21517 21619 21316 21508 21688 22092 21862 22087 21588 21846 21519 21399 21392 21562 21778 21896 22036 21660 21639 21694 21353 21439 21706 22112 21834 22190 21541 21950 21593 17591 19920 20791 21090 21432 21511 21469 21462 21287 21200 23993 21995 22072 21413 21632 21740 22055 21779 22304 21442 21863 21485 21419 21315 21936 21827 22096 21914 21784 21580 21730 21238 21682 21274 21724 21513 22272 21639 22208 21360 21945 21353 21707 21341 21554 21180 21772 21553 22132 21832 22052 21753 21773 21481 21767 21220 21768 21067 21627 21424 21958 21682 22272 21572 22179 21385 22056 21413 21738 21255 21449 21232 21778 21328 22061 21849 22169 21835 21864 21537 21639 21123 21650 21109 21689 21242 21729 21524 22021 21661 22240 21546 22235 21360 21895 21345 21640 21390 21514 21285 21603 21258 21847 21584 22055 21904 22080 21952 22016 21805 21836 21614 21680 21308 21795 21088 21636 21148 21417 21074 21273 21306 21552 21870 22066 22025 22385 22341 22849 22343 23061 22309 23120 22136 22984 21776 22620 21385 22017 21102 21203 21318 20881 21026 20903 20825 21170 21204 21853 21763 22451 22689 22499 22836 21667 22125 21488 21090 21777 21024 21336 21285 21303 21542 21589 22032 21995 21973 22019 21812 21943 21623 21594 21672 21392 21531 21304 21461 21624 21789 21843 22172 21861 22215 21745 22179 21666 22153 21738 22119 21482 21971 20400 21397 21171 21555 21355 21450 21189 21377 21269 23345 21920 21649 21411 21697 21256 21723 21334 21860 21594 21864 21408 22004 21641 22093 21862 22157 21757 22069 21785 21881 21719 21751 21617 21717 21466 21760 21290 21847 21139 21648 21249 21673 21452 21975 21608 22226 21655 22320 21725 22277 21593 22176 21446 22032 21457 21877 21770 21627 21402 21568 21163 21621 21085 21648 21174 21710 21329 21959 21517 22080 21864 22077 21894 22155 21900 22064 21826 21965 21872 21815 21743 21708 21413 21893 21140 21733 21216 21825 21116 21607 21188 21705 21191 21522 21127 21353 21066 21408 21417 21641 21975 22576 22261 22482 22374 22992 22284 23082 21982 22861 21465 22499 21175 21778 21376 21708 21072 21461 21337 21010 21036 20764 20937 20823 21012 21646 21556 22408 22400 22585 22741 22389 22400 21597 21973 21409 21739 21825 21568 21527 21506 21524 21376 21435 21354 21308 21533 21377 21619 21321 21538 21504 21735 21655 22000 21888 22035 21987 22012 22043 21789 21984 21693 21869 21669 21696 21746 21346 21872 21232 21697 21222 21641 21195 21517 21344 21670 21548 21977 21707 22277 21762 22276 21548 22223 21354 22214 21417 22102 21344 21831 21376 21512 21268 21552 21335 21616 21196 21752 21134 21857 21415 21864 21240 21898 21402 21941 21583 22093 21760 22213 21907 22019 21813 22019 21818 22071 21842 21927 21749 21793 21497 21750 21453 21606 21304 21870 21124 21708 21157 21628 21384 21845 21521 22035 21696 22202 21750 22256 21645 22288 21653 22231 21562 22140 21469 22092 21523 22263 21509 22269 21388 21827 21236 21389 21082 20843 21155 20872 20809 20919 20856 21477 21540 22184 21358 22044 22000 22489 22538 22560 22853 21947 22418 21420 21355 21404 20595 21356 20580 21159 21153 21114 21267 21805 22032 22016 21952 21924 21668 21850 21635 21655 21800 21506 21635 21272 21516 21493 21672 21816 22135 21885 22190 21696 22034 21511 22152 21595 21895 21536 21725 21670 21444 21367 21485 21232 21630 21415 21917 21485 22020 21748 22080 21696 22104 21845 22187 21856 21930 21845 21743 21558 21809 21334 21685 21217 21500 21463 21942 21684 22174 21723 22356 21601 22289 21397 22178 21395 21767 21493 21553 21335 21515 21189 21573 21385 21881 21672 22197 21952 22016 21712 21836 21410 21857 21453 21713 21076 21751 21264 21812 21696 22208 21751 22293 21591 22245 21543 22007 21424 21807 21172 21604 21385 21585 21175 21666 21170 21797 21341 21944 21556 22299 21604 22116 22219 22569 22677 22259 22459 21448 21455 21457 20492 21176 20584 21041 20934 21520 16663 19251 19584 20384 19077 19642 19245 18834 19075 28297 24502 23877 23464 22826 22453 21927 22218 21678 22032 21574 21632 21456 21422 21430 21509 21568 13097 18239 19786 20289 20359 20611 20545 20408 20800 20218 26224 23466 22668 22255 22380 22057 22263 21879 22261 21607 22132 21411 21795 21283 21600 21255 21465 15975 19514 20246 21066 21026 21344 21179 21354 21120 21205 24596 23078 21795 22053 21341 21819 21315 21683 21504 21991 21708 22348 21633 22242 21583 22236 21403 19084 20241 20842 20773 21184 20729 21516 21220 21765 27502 23612 22426 22243 21898 21827 21493 21773 21276 21698 21240 21576 21496 22025 21699 22285 21559 22181 20288 21472 21079 21528 21220 21202 20918 20891 20617 23660 22295 22683 22712 22424 22777 22496 22669 21847 22185 21399 21561 21568 20823 21417 20464 21289 20663 21157 21101 21393 21468 21670 21859 22355 21997 21994 21911 22010 21986 21990 21699 21920 21632 21947 21792 21996 21645 21865 21696 21741 21623 21467 21588 21421 21613 21327 21511 21287 21728 21240 21561 21206 21595 21267 21536 21325 21612 21504 21625 21274 21636 21458 21719 21430 21860 21598 22112 21648 22264 21772 22424 21761 22226 21643 22209 21580 22168 21429 22231 21334 22204 21321 21954 21382 22084 21396 22093 21360 21937 21367 21763 21708 21756 21496 21710 20600 21817 21241 21982 21338 21907 21369 21785 21528 21658 21510 21620 20881 21767 21319 21744 21178 21704 21382 21480 21240 21509 21264 21623 20935 21536 20984 21370 20804 21210 20880 21217 21079 21591 20968 20801 20849 20945 20826 20788 20958 21072 20839 20969 20955 21379 21297 21787 21304 21741 21008 20908 20928 21228 20992 21265 21072 21661 21850 21697 21917 21728 22034 21840 21805 21905 22091 21879 22045 21816 22119 21724 22179 21552 22038 21445 21799 21373 21479 21820 21475 21606 21440 21424 21562 21289 21532 21423 21498 21372 21473 21317 21417 21178 21639 21224 21581 21169 21649 21175 21655 21200 21719 21333 22004 21669 22098 21782 22152 21575 22063 21652 22114 21667 22160 21825 22259 21913 22202 21949 22097 21912 22122 21904 22061 21968 22065 21826 22036 21804 22055 21868 22025 21761 22080 21850 22023 21867 22124 21849 22108 21874 22098 21864 22115 21882 22081 21826 22075 21872 22077 21799 22109 21864 22144 21741 22036 21660 22176 21601 22019 21463 21829 21285 21632 21075 21301 20951 20662 20981 20800 20992 20704 20875 20878 20949 20757 21048 20714 21213 20932 21138 20929 21034 21205 21208 21269 21152 21165 20955 21538 21989 21733 21676 21929 21730 21969 21634 21974 21696 22011 21716 21964 21826 21913 21984 21955 21880 21990 22016 22016 21920 21977 22034 21952 22016 21968 22042 21910 22141 21888 22090 21876 22067 21852 22081 21777 22032 21726 21991 21696 21976 21538 22009 21402 21833 21284 21578 21181 21565 21321 21558 21405 21884 21349 21991 21328 22208 21400 22183 21560 22176 21448 22115 21658 22209 21748 22356 21760 22165 21668 21966 21428 21869 21353 21723 21179 21580 21206 21677 21073 21766 21475 21815 21570 21792 21700 21820 21861 21968 21909 21892 21966 22093 21877 22164 21693 21989 21091 21504 20962 21116 20964 13456 17432 18333 19310 19316 19181 20027 19534 20748 19649 27147 24352 23908 22915 22533 12832 17783 18733 19566 19298 20332 19639 20480 20113 20530 27404 23959 23438 22468 22413 22064 18413 19958 20614 20672 20775 20800 20846 20763 20999 26743 23796 22498 22134 21964 21924 18838 20528 21197 21414 21584 21653 21417 21401 20992 21203 23021 22423 21751 22362 21745 20234 20988 21637 21340 21421 21078 21581 20969 21393 21351 22944 22268 22259 21721 21936 21323 21620 21378 21625 21498 21851 21408 22171 21292 22315 21653 22186 21531 21733 21076 21596 21489 21767 21831 22176 21927 22188 21305 21674 21123 21533 21485 21927 21303 22144 21525 22288 21629 21850 21488 21524 21252 21601 21190 21904 21376 21801 21627 22005 21883 22114 21587 21801 21098 21489 21322 21509 21271 21748 21414 22537 21918 22899 22257 22514 21275 21095 20705 21146 20457 21350 21064 21265 22040 21761 22708 22471 22246 21728 20944 20800 20975 20849 21431 21784 21312 22963 22258 22299 21897 21648 21513 21345 21367 21494 21934 21788 22017 21943 21993 21510 21435 21376 21779 21483 21625 22007 22050 21632 21716 21345 21456 21680 21858 
42657 39965 40403 38850 40842 36663 36632 33638 36411 37296 42264 41708 40516 36461 35008 33271 32520 35944 42308 39905 40520 39424 34865 34623 37367 35522 41492 42477 41361 36790 37191 34450 41240 41030 38648 37029 32931 34704 34400 32711 35584 36603 41946 42200 40411 37725 36836 34752 42576 36325 41664 40068 38656 39491 34585 35879 37413 34354 41856 41760 40673 35380 35100 33156 33478 35008 32602 39304 38887 39477 35472 33368 36007 38132 40868 42661 40624 34413 41530 36739 41440 37176 35139 40848 39280 42560 41746 39427 36564 43647 36811 37204 39907 35123 37808 36339 40192 41665 35329 40241 42240 40231 41774 38407 38208 43330 38630 43440 36412 33879 40687 41067 32666 42135 42195 37580 39987 37026 37002 36866 41394 33080 32704 35150 37741 39904 34336 36003 34482 41637 42959 37216 38704 37457 37730 35292 33687 33969 40393 35072 35800 39264 34932 38608 33265 35665 33560 42045 41739 39968 37017 39255 38016 35842 33208 33696 40931 34905 35637 39888 34272 39472 42720 35940 41511 35632 34624 39266 37806 37498 32832 35893 40183 34820 42472 38563 35714 41334 41710 37412 41220 34190 41816 39602 31366 36776 34048 40391 39749 36443 31808 38581 39533 43883 42523 39580 33644 36504 35975 40134 43021 35484 42144 40193 37224 38453 35266 36498 40625 36023 38720 34592 33408 40149 34713 40064 40886 33451 41248 36588 35544 40933 36819 37360 41878 41754 40084 35930 40640 38474 34584 41739 40784 37226 42448 35509 41370 39520 35264 39328 36737 35504 39689 34613 34368 40438 34304 39184 42341 34352 40016 36662 35396 39587 37480 36146 33201 35144 39408 34244 33289 39984 34850 40023 41952 34111 40384 35203 34356 39687 39208 36742 32917 35096 36130 40066 33118 42234 38625 36381 38486 40193 36867 37680 38192 39993 43938 43243 41379 36012 33539 38800 42304 35668 38292 43589 40680 39369 37322 40788 36093 34996 35478 32960 38679 41024 37770 41175 42568 37543 33817 35973 39449 36496 33208 34172 35868 33645 39508 40437 36806 36087 37874 39396 34529 35159 41607 40792 33224 35584 40688 34932 35746 42368 43216 37461 38158 37217 33879 42851 43256 33671 38592 35801 38336 33088 42668 41772 37984 37587 37748 36366 33735 40197 34396 36672 40192 33850 34312 41169 33831 35319 38450 38148 35088 40960 34389 40771 39843 35082 39080 36554 42677 40231 38343 29632 38314 36508 33344 34247 42092 39059 34472 36724 42090 38016 38711 36175 34982 38372 38369 40199 35290 34272 40438 35125 40183 41760 34613 39144 37419 36432 38423 36004 35786 40181 33697 41328 40206 34635 40960 40521 37464 40806 33738 40477 40076 36889 35648 42176 34005 37977 34071 33324 39495 35531 41240 41752 36304 40621 34775 39279 37847 34265 38808 35769 36112 41856 42848 39264 34564 32715 39541 34164 40515 41762 33542 40141 37486 36818 38871 35479 34948 40096 35965 40343 37143 36020 41312 41924 36288 41949 34352 42396 40100 37595 36130 33540 34412 38987 34400 34583 41050 34288 39178 42320 41648 38656 38997 42676 39271 37474 41992 34844 38996 36080 36130 42036 38172 41984 35398 38977 37001 40453 44235 36702 35688 36966 40807 33610 39492 37960 36809 42358 38561 42929 36609 39898 34872 37879 39890 36112 37092 35509 40358 33383 38373 38482 38912 42464 37984 40609 40484 33478 40928 33895 35921 40564 35537 36381 32572 41872 41345 42937 33923 36960 39748 35200 36101 34304 41474 43283 41608 36050 36948 39639 35907 38580 33921 32871 41083 35975 34883 39016 37605 35568 33284 34124 40600 33112 34214 39058 37078 40919 42806 37991 36909 34988 39717 31729 33902 37216 37649 36897 32880 37156 44203 37615 34858 36048 38962 41760 42132 36124 42184 34382 41286 37811 35568 39145 36612 36250 42633 35415 39285 34349 42516 39916 35464 40823 42944 38293 36700 33009 38731 36593 33775 40344 35926 37376 32924 34393 39319 34984 32827 40689 35912 41863 34384 40777 41774 35729 39216 36368 35285 38712 38106 35673 42963 36120 40529 36557 39912 34112 33028 41264 42464 39879 41044 34069 40256 33530 40376 39561 36864 38345 36595 34381 40536 35519 40654 35959 33705 40993 33251 39392 35844 33030 41319 33573 41203 38855 36712 39095 37208 35811 33863 34083 39248 33294 42231 39067 35523 41200 33137 39441 41524 33261 39288 42198 40485 42000 44212 37669 37194 43044 34028 38752 39056 38755 40803 38857 37105 33717 38634 39273 38972 38852 34672 34864 36038 33659 40652 41602 33512 41617 40816 40322 40096 35060 38358 36849 35608 32821 38862 33623 36044 35976 35660 42229 37332 40104 34286 40960 37705 43312 40768 37872 33570 32886 34120 40794 32934 34776 39343 37096 39496 33930 36663 33153 41764 41830 33824 35703 37142 38676 34788 34398 35105 41401 42799 35525 39431 36747 40600 33483 37911 33996 32070 36457 35512 38553 42252 33235 42593 42857 41112 39929 39659 38696 39225 42160 34371 35597 39027 36056 41360 42456 37353 43008 42519 41290 37802 36588 39296 37604 35985 33744 35301 40300 35057 40464 35676 32849 40792 34695 40386 41548 38129 41552 35584 41408 33584 39592 35995 33317 39688 36640 38872 35982 35943 42767 36156 40039 35889 38506 34610 41846 38235 34949 40896 33788 40192 41862 39161 42153 35913 40376 42614 40416 36002 40940 39370 36960 40272 36902 36942 33140 34364 38884 34550 38883 35175 40358 35625 32888 38380 34881 40791 33552 40971 41584 37574 41323 34535 41730 33143 40528 34248 40231 37040 33652 38944 37280 39118 37864 38370 36482 36660 34336 34632 40875 36337 38490 34363 39217 42227 38672 40632 41116 33444 37024 39014 38729 42534 42304 37290 42176 39653 41824 40156 40072 38723 35850 34642 41585 38656 39073 40072 41189 36509 37861 36801 35865 39424 39983 37115 35738 43095 35568 43638 37232 34805 39891 42825 38935 35872 37731 41232 40909 41216 33508 33737 38376 38645 38314 38599 36391 37961 34514 33849 34612 41452 33496 40664 42775 34573 36096 36713 40292 37152 40891 35877 40324 34839 39969 35818 39818 42992 38471 41735 42112 39829 33632 41424 42674 40072 41668 40737 42562 37659 34491 41880 35279 40141 35729 41187 37075 33984 36818 41760 38743 34528 39464 37096 40237 36188 39178 36152 37236 35557 35872 34139 35277 42546 35767 40692 37050 39212 34446 40013 35018 42369 38576 34164 40676 34905 41501 35867 41216 34204 40012 42544 38777 42539 37466 35776 34469 41763 33664 39470 34464 38700 34414 39520 35516 41035 38319 33130 38918 37024 39413 37352 40219 37491 38964 36524 38226 37008 36532 35952 35228 41955 37440 39175 35733 39872 36564 39072 34354 39559 35373 39833 33077 38970 41591 38643 41849 42343 34678 38233 33920 41216 43589 42744 38832 41472 39880 38592 37504 42689 44032 40089 36021 41307 35522 38272 42673 41576 37890 38182 35168 37013 35907 37655 34601 33261 42352 42603 34488 35921 42570 42632 34421 38148 41947 36027 36336 33402 33008 32480 32724 41155 42632 41779 41236 33520 41314 34509 40996 33336 32383 35508 34631 38267 37037 38765 38464 38806 39040 36317 38151 35304 37089 34838 34843 35586 41224 37110 40133 35208 40096 34603 39843 33222 40984 34994 33302 38115 35432 41189 35848 41100 33616 40920 41664 40993 42315 39795 41317 36891 41367 33012 40215 33409 41189 34289 39755 35907 39204 36952 42160 37176 40352 37447 41923 38096 34076 39440 35643 40712 37588 38582 36496 38528 36540 39298 36747 37764 35866 36008 42964 36103 42560 34435 40724 37348 38951 35408 39369 34573 41472 36982 32929 38544 35049 40560 36004 41052 34806 41096 34816 40976 33792 39907 42952 39702 33192 41292 33081 41386 41962 36784 40266 42042 38901 36277 39379 36300 35640 36909 36160 42688 33450 40160 41782 39080 38449 43664 33866 33504 37050 38048 42728 42448 41920 42198 33598 41379 33241 39378 39396 39151 40552 36565 38528 38377 37842 37576 34733 36743 34340 34592 36010 32640 34133 40298 33124 42736 35018 36282 40034 37554 40640 35122 38555 33054 39776 34229 37242 33032 35451 34697 42144 42024 43264 40426 34732 42025 37873 43024 38743 35801 39056 35032 39428 36900 40593 36900 37717 36820 35931 33465 36103 41200 35232 39960 43216 43032 38144 34988 40320 35759 42036 34236 41186 42075 40498 41984 36133 42901 33665 41200 33234 39644 33824 41540 37452 34776 40506 37925 38373 35234 36608 41865 37064 42609 35537 38419 36008 40185 36443 34928 40393 36117 41424 34258 41033 33624 38600 42057 36760 39584 34144 41563 33986 39616 34773 39392 36310 41432 38000 33448 41448 34209 39511 41016 34188 35097 41243 43610 42682 43037 42765 32282 39383 33212 37922 37060 32736 32021 39277 32929 41237 37944 33851 39456 35120 37625 44352 45170 38550 43662 37173 43233 38053 40881 35212 38444 33760 33978 42155 42514 42522 33146 33235 35436 39184 35446 40490 41619 33588 32393 41602 35536 40042 42522 43991 35453 41402 42715 39312 41579 37524 41393 34464 39739 42144 36416 40656 34040 40283 42811 36717 32272 39927 38581 37928 41257 39991 41664 38991 40091 34796 39512 36284 38950 41556 36800 41004 35187 32495 38333 35370 42030 34503 40879 34232 40922 42230 38070 40066 36197 35190 39447 35044 32841 39875 35920 45880 35667 42811 41396 37524 36568 42951 36264 40569 35226 40256 33800 42720 38887 35268 41385 33864 40264 40618 42715 38975 33139 39899 39985 37020 36628 33442 35637 41485 35604 35528 42702 36778 43480 35546 36866 40487 42133 33869 33242 35768 42040 42653 41025 34353 39307 39084 41795 42914 35073 36865 42150 38861 38552 37647 38712 38368 38491 35248 37318 34147 37895 35997 38476 34676 36932 34952 35746 34407 42604 34072 42107 34608 41271 33197 40630 35520 40266 33764 39842 34236 40327 33190 41064 34422 32439 34178 40407 34432 42280 35767 42170 37109 34148 39367 34464 41184 36096 42728 35928 40760 34759 40517 33984 40021 42409 41319 41478 40935 41304 38067 41708 39456 41862 39784 41528 37921 41816 35975 35168 35849 42791 35680 33408 36316 40411 38592 41388 37620 41735 36280 32964 34469 32680 34024 36310 35880 41108 35771 39680 35274 41570 42952 40632 33043 40059 34608 37040 33025 37423 41696 35702 39974 36330 40015 38832 34084 37249 35448 36007 37032 35872 35257 37368 38322 36188 37443 37421 41603 40960 36332 40797 35987 37504 36762 36762 40245 37493 40359 38473 34891 36760 35040 37575 35384 38560 36608 36388 37291 39541 37440 39025 36469 39850 35656 40312 33424 38631 42464 36576 41827 43153 36692 42736 34374 41984 42216 33852 40602 33370 42168 43300 42052 42894 41367 42327 39945 34648 40024 34052 39355 34569 39633 34839 39637 35653 41191 38722 34895 39322 36102 39945 33952 39175 34594 39507 34890 39860 36569 41333 37700 40725 38237 39494 37514 39849 37327 39224 38075 39106 36532 38666 36379 39080 37184 38663 35728 39048 36937 38706 37237 39872 36983 39664 37160 39424 37049 39735 37376 39239 36536 39350 37043 39415 36428 39749 37056 39758 35944 38634 34771 40040 34108 38400 42752 36827 40681 34275 38424 40929 37543 34076 37521 35360 37283 34384 36320 36416 37222 35016 38088 34740 40098 37072 39104 37000 38093 40070 40057 40673 39371 39771 37666 33184 38179 35684 34860 37639 35509 38016 34291 38108 35008 38713 35396 38048 36496 37490 38200 38040 37216 38434 38400 38376 37478 38311 38712 37844 38370 38032 38901 37543 40208 37126 39424 37195 39173 36981 39225 35952 38494 35688 38492 35008 38096 33184 38517 41974 36865 40576 33923 39716 33868 40960 33703 41872 37517 41476 38739 41088 40675 41995 40769 33674 40000 42496 39968 34828 40512 35893 42055 35767 40148 34855 38116 42179 37424 41528 35795 39760 33936 39854 35170 38353 35848 42679 36778 33552 35785 35058 36432 36974 37977 37511 37172 38241 39625 37320 40119 35384 38355 38813 32668 37099 39072 37424 29348 29696 39730 40393 40420 39258 38187 32668 34712 33741 41812 43264 38752 37909 33498 32496 34196 33990 32887 39782 41331 34063 31424 38535 32464 44448 39525 43608 43600 43170 39143 41216 37519 33421 33783 35174 35244 36133 35138 37648 37802 37327 43603 40264 38278 37610 35208 32183 39770 42186 33905 34466 41953 42148 37577 40016 39372 43077 36224 42240 35957 39970 37888 34432 41220 42466 38834 34012 37353 41768 41805 38240 41522 41568 35691 37546 41248 34432 41366 34624 42880 37227 41787 40593 40983 42025 34876 40352 33431 35447 38400 34112 42656 36152 36676 40144 37909 40545 41117 35060 38945 33392 42752 38024 41070 39941 33248 41012 34759 36740 42667 33248 40001 34119 39664 37307 41411 36458 34519 38528 37442 39623 34007 36121 38786 42896 41394 33092 40449 35893 41992 33816 37541 37804 41262 43978 40984 39076 34586 39180 42624 41751 38576 40427 38916 35760 35497 43392 41442 35552 36905 35331 37696 36116 42240 36208 40780 38618 41312 41845 37529 34361 32770 41079 41959 43232 38119 36178 38400 38040 38535 32918 42184 41635 36152 42896 34696 38656 38921 34211 35166 41198 42535 35008 36762 
23248 23452 23435 22943 23799 22821 23306 23175 23201 23200 23156 23035 23716 22809 23680 23031 23531 23396 23274 22902 23691 22721 23524 22833 23403 23364 23162 23105 23704 22712 23612 23264 23407 23218 23644 23089 23909 22809 23342 23191 23211 23334 23184 23115 23737 22837 23763 23122 23306 23397 23255 22915 23668 22682 23445 22823 23437 23227 22996 23175 23629 22788 23717 23032 23290 23479 23141 22969 23661 22858 23309 23200 23048 23211 23032 22970 23755 22426 23925 23542 22834 24209 22923 22864 24377 22273 22961 23886 22333 23204 23314 22725 24050 22515 23484 23872 22784 24216 23098 22727 24576 22450 22860 23956 22263 23165 23197 22990 23233 23065 23196 23527 22834 23598 23216 23285 23511 23040 22997 23563 22875 23382 22903 23292 23482 23105 23215 23424 22689 23727 22734 23171 23303 23113 23237 23109 23104 23552 22985 23812 22863 23220 23307 23049 22944 23296 22945 23604 22684 22829 23403 23114 23085 22676 23372 23163 23576 23300 23201 22769 23120 22723 23153 23167 23712 23013 23462 22406 22985 22698 23310 23024 23661 23269 23314 23016 22611 22580 23113 22856 23664 22983 23639 7879 15894 16271 16923 16973 17860 17770 18083 17937 17870 28576 26049 24609 24683 23833 24189 23872 24375 23785 24337 23344 23808 23132 23558 23136 23705 23435 23902 23616 23558 23141 23591 22969 23444 23453 23873 23070 23638 22896 23247 22790 23561 23144 23793 23479 23557 23241 23519 22757 23207 23065 23797 23239 23648 22975 23412 22832 23228 23019 23609 23411 23303 22915 23234 22879 23331 23397 23745 22976 23399 23053 23093 22732 23323 23264 23580 23368 23285 22949 23149 22721 23194 23350 23672 23037 23385 22909 22922 22490 23318 23363 23789 24064 23177 22965 22880 22185 22857 23712 24346 23744 24215 22739 22688 22643 22423 23247 24020 24185 23040 22824 22652 22193 22681 23550 24380 23093 23484 22836 22191 22487 23598 24174 23283 23143 22749 22188 22592 23072 24087 23556 23600 22402 22183 22351 23668 24119 23409 23674 22851 22864 22797 23019 23187 23354 23256 23069 22814 22889 23040 23478 23093 23247 22853 22864 22822 23373 23426 23067 23065 23084 22784 23173 23244 23530 22863 23045 22821 23081 23090 23468 23242 23165 22721 22954 23072 23594 22948 23396 23239 22964 22720 23436 23333 23276 22875 23060 22688 23283 23177 23529 22790 16178 17465 18685 18969 19186 18820 19332 18964 19319 19385 26542 24422 24562 23853 23843 23547 24128 23697 23657 23088 23543 22920 23465 23386 23858 23069 23456 22980 23236 22870 23701 23334 23460 23080 23419 22663 23305 23038 23784 23101 23687 22833 23145 22698 23494 23190 23575 23314 23258 23013 23178 22755 23191 22941 23632 23219 23795 22804 23404 22880 23022 22716 23236 23006 23609 23224 23232 22819 23102 22690 23360 23143 23737 22834 23143 23014 23002 22844 23570 23268 23402 23139 23223 22647 22957 23016 23545 23072 23469 23296 23012 22642 23177 23127 23456 23218 23083 22759 22922 22848 23233 23285 23915 22827 22710 22395 22817 23198 23845 24048 22846 22444 22932 21984 22569 23143 23959 23482 23957 22622 22136 22352 22852 23148 23870 24081 23355 23288 22946 22038 22524 22915 23846 23722 24101 22615 22343 22430 22912 23527 23848 24183 23163 23299 22862 22048 22681 23255 23314 23266 23243 23028 22741 22948 22787 23223 23226 23523 23107 23311 22810 22881 22784 22980 22987 23385 23337 23196 23158 23033 22870 23201 22641 23132 23145 23559 22842 23260 22999 22880 22636 23202 23126 23336 23239 23102 22940 23061 22588 22987 22800 14889 19091 20219 19680 20273 19899 20141 20068 20697 20656 26549 24564 24108 23452 23639 23081 23489 23271 23784 23220 23842 22923 23434 22768 23105 22596 23321 23084 23539 23252 23224 22940 23361 22656 23111 22787 23388 23126 23652 22925 23400 22983 22951 22695 23259 22988 23612 23177 23196 22823 23165 22743 23082 22540 23196 23094 23632 22800 23397 22760 22995 22561 23004 22645 23441 23207 23467 23111 23189 22625 23140 22580 23286 23032 23666 22946 23556 22712 23053 22720 23064 22598 23393 23159 23375 23109 23083 22661 23051 22796 23233 23142 23506 23064 23541 22727 23120 22784 22896 22560 23079 23040 23427 23232 23169 23014 23186 22567 22973 22588 23008 23187 23684 23051 23709 22706 22455 22312 22741 23001 23793 24097 23287 23328 22894 22294 22667 22080 22804 23473 24210 23173 23359 22895 22122 22453 23144 23504 23733 23706 22784 22407 22720 22181 22932 23683 24220 22978 23243 21944 22263 22405 22868 23463 23649 23814 23669 23896 22696 22804 22691 22843 22803 23254 23224 23433 23223 23091 22807 23074 22717 22894 22762 23047 23192 23531 22916 23215 22728 22744 22680 23111 23137 23371 23288 23056 22856 23518 22710 22892 22821 23207 19805 21248 20824 21414 20975 21207 21033 21231 20950 27738 24340 24084 23552 23724 23440 23334 23036 23419 22635 23073 22871 23528 23172 23592 22790 23341 22454 22977 22578 23220 22872 23511 23201 23412 23072 23175 22732 23344 22503 23008 22852 22952 22898 23466 23051 23584 22843 23484 22791 23059 22736 22968 22527 23227 22688 23451 23170 23485 23257 23283 22888 23088 22672 23180 22605 23045 22644 23070 23012 23559 23123 23562 22900 23511 22728 23283 22848 22892 22519 23149 22850 23559 23106 23528 23304 23351 23221 23139 22981 23099 22742 23063 22637 22869 22778 23077 23023 23457 23144 23450 23046 23520 22824 23378 22788 23142 22744 23041 22795 22889 22669 23176 22835 23375 23066 23452 23106 23523 23414 23501 23801 23275 23709 22988 23326 22768 23068 22672 22521 23083 22332 22688 22282 22791 22000 22572 21954 22608 22447 22966 23195 23505 23695 24294 23695 24198 23453 24008 22759 23623 22517 22565 22742 22118 22332 22657 22786 22926 22680 23427 23352 23238 23537 23042 23316 22758 23062 22821 22775 22756 22864 22727 23128 23177 23261 23252 23277 23303 23096 23105 22979 22765 23561 22676 23148 22516 23191 22629 23156 22564 22919 19991 21584 21681 22044 21924 22360 22184 22820 22269 22618 23974 23925 23286 23724 23109 23662 23001 23582 22820 23488 22855 23536 22708 23373 22685 23223 22475 23018 22677 23021 22695 23002 22473 23047 22632 23142 22813 23404 23152 23488 23224 23424 23127 23218 22999 23098 22828 23319 22592 23184 22582 23258 22562 22996 22660 23000 22819 23282 23026 23586 23053 23630 23069 23719 22978 23616 22957 23640 22828 23461 22704 23237 23262 22952 22823 23073 22673 22987 22768 22944 22633 22930 22656 23206 22952 23407 23296 23463 23215 23437 23242 23481 23226 23437 23399 23362 23443 23436 23756 23183 23605 22784 22871 22720 22985 22732 22400 23006 22190 22839 22001 22482 22057 22568 22761 23156 22589 22635 23009 23255 23632 23724 23837 24306 23596 24200 22944 23768 22541 23113 22591 22504 22788 22597 22819 22656 22935 22949 23180 23165 23303 23153 23386 23206 23447 23245 23458 23141 23517 23079 23601 23061 23440 22918 23401 22747 23114 22769 22994 22983 22807 22659 22862 22672 22944 22605 23067 22664 23209 22945 23415 23144 23441 23281 23464 23241 23370 23161 23173 22927 23130 22671 23303 22509 23097 22487 23059 22537 23033 22691 23078 22873 23287 23136 23581 23171 23664 23024 23730 22883 23704 22883 23571 22882 23632 22785 23568 22752 23384 22711 23284 22786 23065 22806 22998 22534 23059 22839 22925 22585 22978 22624 23067 22644 23290 22873 23493 23159 23472 23253 23420 23340 23324 23138 23152 23068 23039 22816 23611 22672 23168 22620 23125 22559 23114 22567 23085 22551 22886 22551 22763 22466 22607 22552 22848 23116 23457 23617 23928 23785 24278 23639 24248 23150 23858 22883 23959 22759 23416 22577 22787 22651 22114 22423 22192 22389 23068 23308 23767 23943 23776 24123 23505 24128 23033 23244 22861 23033 22900 22838 22720 22833 22770 23159 23172 23072 23140 23364 23365 23186 23148 23068 22885 22451 22700 23077 22663 22898 22666 22860 22752 22869 23010 23354 23196 23597 23009 23648 22912 23618 22692 23492 22751 23287 22706 23440 22711 23155 22064 23121 22735 22993 22610 23151 22812 23430 23202 23479 23251 23255 23079 23050 22997 23163 22679 23145 22536 23067 22585 23022 22921 23489 23076 23540 23165 23637 23013 23470 22848 23234 22800 23047 22704 23059 22575 23088 22609 23264 22978 23532 23232 23338 23093 23089 22855 23122 22647 23085 22571 23069 22696 23018 22852 23225 23046 23576 23232 23647 23096 23523 22851 23676 22883 23344 22677 23609 22723 23072 22429 22395 22598 22277 22460 23092 23351 23798 24049 23976 24069 23555 13236 15290 16061 16648 15929 16727 17104 18025 18385 18992 27942 26766 24743 24727 24437 24068 24235 23596 23769 23492 23684 23736 23936 23855 24122 23591 23891 15901 18024 18481 18642 18664 19054 18932 19475 19476 19776 26668 25482 24951 24553 24212 24162 23808 23930 23399 23932 23275 23682 23427 23890 23677 24049 23618 19145 19347 20368 19771 20403 20048 20468 20129 20566 28128 25480 24353 24640 24105 24357 23995 24183 23764 23812 23531 23613 23121 23663 23085 23697 22967 23424 20230 21223 21255 21858 21284 22089 21212 21922 21175 25813 23949 23838 23424 23593 23164 23592 23287 23816 23552 23844 23596 23426 23338 23419 22939 23409 20130 21818 21701 22147 22080 22575 22481 23194 22679 23484 24002 24251 23016 23026 22944 22779 23043 22409 22564 22650 22656 23127 23182 23726 23727 24072 24335 23984 24388 23489 24204 23330 24021 22984 23760 22843 23328 22856 23127 23072 23067 23111 23032 22944 22992 22994 23066 22889 23016 22807 23242 22920 23312 23050 23560 23297 23479 23202 23580 23269 23648 23420 23664 23360 23520 23416 23495 23290 23504 23415 23567 23332 23436 23363 23457 23278 23348 23040 23268 22824 23113 22967 23301 22871 23012 22855 23489 22688 23376 22664 23245 22688 23176 22865 23163 22733 23190 22821 23125 22988 23261 23024 23412 23031 23475 23102 23238 22876 23191 22792 23235 22909 23233 23104 23480 23171 23421 23128 23316 23101 23154 23069 23480 23193 23534 23202 23765 23241 23783 23200 23814 23159 24084 23418 24320 23562 24345 23423 24257 23469 24369 23799 24433 23734 24417 23912 24433 23717 24390 23619 24388 23367 24230 23136 24039 23128 24344 23837 24360 23690 24336 23496 23424 23163 23273 23158 23255 23096 23075 23172 23252 23094 23140 23175 22919 23288 22789 23046 22765 23148 22785 23076 23015 23248 23149 23257 23191 23415 23227 23376 23067 23457 23168 23639 23281 23590 23226 23702 23205 23698 23079 23716 23095 23729 23116 23811 22951 23719 22951 23639 22857 23584 22791 23470 22837 23547 22851 23506 22732 23488 22677 23367 22704 23267 22935 23111 22985 23104 22951 23062 22760 23122 22874 23085 22820 23156 22958 23098 22825 23074 22948 23178 22933 23127 22885 23239 22376 23186 22807 23221 22920 23194 22922 23209 22895 23142 22790 23361 22834 23346 22866 23362 22908 23449 22890 23766 22922 23936 23022 24128 23201 24301 23797 24215 23819 24233 23844 24303 23830 24375 23906 24228 23801 24244 23921 23561 23557 23715 23547 23340 23249 23234 23196 23024 23277 22988 23239 22895 23048 22713 22920 22841 22865 22903 22946 22970 22878 22958 22887 22905 22984 22892 22957 23004 23029 22191 23185 23140 23033 22758 23129 23366 23217 22860 23127 22844 23229 22859 23377 22829 23462 22824 23435 22754 23438 22766 23527 22816 23591 22836 23624 23025 23709 23052 23670 23191 23648 23154 23274 22854 23104 22618 23152 22583 23080 22657 23354 22633 23195 22647 23242 22859 23157 22912 23211 22943 23319 23165 23310 23212 23449 23264 23665 23312 23517 23319 23460 22788 23191 22720 23121 22681 22991 22829 22994 22793 22976 22948 23177 22853 23360 22817 23406 23025 23842 23275 24119 23420 23835 14886 16318 16773 16773 16937 16914 16963 17066 16784 30404 25628 25344 25024 24473 25049 16550 19278 19450 20134 20047 19773 19962 19681 19416 18849 25729 25287 24807 24694 24456 16773 19764 20253 20538 20617 20950 20791 21058 20983 21002 26656 25118 24766 24155 24172 23778 20597 20925 21361 21042 21616 21285 21969 21549 22282 26192 25010 23996 23920 23495 23950 21661 22394 22336 22531 22672 22961 22576 22877 22183 22635 23609 23731 23337 24041 23493 24167 23503 23935 23499 23719 23280 23517 23040 23607 22995 23626 23349 23641 23547 23844 23127 23453 22894 23229 22468 23631 23080 23992 23405 23977 23368 23520 22924 23399 22891 23440 23210 23478 23438 23574 23552 23820 23534 23750 23239 23389 22956 23228 23171 23433 23060 23740 23264 23900 23430 23754 23360 23323 22900 22779 22428 23127 22793 22981 23739 23757 24461 24244 24329 24121 23314 23367 22732 22456 22759 22437 22820 23914 23345 24519 23986 24096 23601 23096 22540 22791 22336 22784 23331 23071 23669 23311 23732 23372 23120 22793 23307 23055 23174 23470 23451 23521 23591 23287 23276 22881 23236 22968 23671 23213 23709 23376 23431 22991 
22144 21935 22823 21600 22720 21715 22665 22456 21860 22759 22390 21826 23814 20896 22215 22536 21150 22246 21897 21975 23320 20912 23661 22057 21632 23649 21709 21620 23984 21405 22215 23717 21037 21582 23542 20706 22496 21548 22343 23203 21684 22819 22083 22621 22619 22052 22057 22717 21736 22294 22083 22285 22347 21952 22465 22592 21878 22941 21831 22491 22584 22123 21928 22821 21688 22564 21895 22437 22273 22159 21991 22892 21516 22864 22115 22196 22387 22313 20960 23159 21316 22604 22035 22151 21867 22491 21671 22822 21605 22649 22208 22126 22449 22619 21751 23206 21399 22404 22116 22220 21789 22674 21527 22732 21562 22752 22229 22187 22197 22535 21577 23222 21607 22624 22348 22210 21736 22576 21632 22647 21356 22880 22016 22180 22416 22272 21895 22999 21637 22616 21706 22310 22194 22103 22282 22566 21583 23048 21431 22369 21801 22087 22317 21875 22378 22816 21467 23894 21320 22392 23463 20939 22115 22242 21034 23096 21198 22284 22792 21141 23052 22823 21130 23888 21431 21507 23463 20810 22354 21806 21580 23200 21084 23454 21924 21654 22848 21659 22352 22062 22040 22213 22009 22061 22607 21719 10912 12234 13930 13250 14488 12984 13165 28117 27461 26894 26167 26060 26235 26420 25394 25287 23307 22698 22967 22671 23648 24183 24424 23781 24490 22489 22274 22122 21665 22845 22992 23462 22407 22701 22427 22274 22055 23025 22999 23017 22891 22528 22261 22339 22000 22368 22468 22928 22394 22759 22420 22141 21731 22197 22411 22807 22574 22311 21847 22133 21840 22768 22336 23091 22019 22259 21834 22165 21710 22538 22375 22659 22391 22481 21798 22119 21456 22621 22196 22995 21865 22467 21646 22075 21744 22747 22386 22642 22239 22304 21587 22055 21776 22729 21991 23116 21705 22849 21937 22156 21400 22423 22152 22855 22157 22429 21478 22088 21761 22711 22087 22964 21698 22305 21548 22102 21676 22869 22368 22489 21691 22257 21228 22264 21802 23075 21640 22567 21443 21975 21674 22706 22301 22349 21671 22237 21376 22185 22018 22839 21963 22808 21513 22299 21437 22713 22301 22559 21709 22381 21588 22417 21903 23049 21632 22381 21393 22242 22149 22633 22281 22261 21383 22088 21575 22841 22099 22798 21014 21909 21650 22585 22298 22475 21955 22246 21341 22220 22209 22980 21724 22251 21527 22352 22067 22774 22287 22528 21312 10272 12000 14510 13932 14949 14093 15315 16293 17175 29859 28035 26257 25632 24503 25683 25469 26105 23404 23245 22413 22498 23168 24333 24488 22848 22416 22112 21674 22678 23371 24360 22412 22348 21847 21408 22284 23430 23722 22843 23242 22238 20952 21546 22246 23938 22885 23598 21995 21794 22349 21863 22109 22376 23012 22157 22871 22024 22173 21815 22069 22200 22633 22642 22644 22487 22326 21888 21881 21946 22712 22371 22871 21958 22161 21654 22218 22302 22776 22440 22406 22128 22490 21655 22135 22135 22967 21985 22631 21875 22039 21466 22513 22280 22449 22320 22664 21498 22182 21896 22976 22026 22790 21748 22134 21568 22557 22296 22761 22228 22344 21500 22299 21326 22436 21965 23042 21825 22716 21554 22094 21628 22784 22180 22642 22320 22355 21692 22376 21448 22421 22032 23158 21760 22867 22080 22063 21419 22664 22246 22678 22033 22453 21680 22261 21558 22489 22135 23169 21895 22750 22272 22158 21390 22455 22192 22729 22119 22423 21760 22551 21288 22282 21843 22968 22056 22880 21789 22610 21734 22024 21413 22169 22210 22736 22248 22340 21705 22397 21488 22265 22121 22854 22145 22904 21663 22192 21572 21827 21590 22602 22208 13739 14562 15336 15540 16631 16517 17693 17805 19091 18164 27970 25332 24972 23746 23917 23886 24706 24890 24008 23977 22724 22466 22310 21321 22128 22711 24036 23149 24035 21916 21969 21591 21580 21403 22393 22915 23296 23770 22175 22169 21840 20893 21511 22064 23340 22837 23878 21772 21752 21456 21204 21169 21468 22225 23127 23865 22048 22327 22061 21872 21791 22646 22163 22709 22716 22423 22228 22241 21773 21884 21885 22573 22554 22831 22148 22566 22282 21949 21781 22198 22176 22827 22513 22455 22156 22545 21587 22044 21934 22796 22189 22976 21957 22408 21161 22071 21585 22103 21671 22640 22281 22720 22354 22263 21687 22222 21389 22221 21924 22706 22157 22871 21923 22673 21749 22066 21491 22599 22181 22786 22368 22388 21724 22254 21319 22122 21597 22819 22040 23040 21586 22440 21482 22039 21697 22878 22387 22634 21997 22376 21359 22152 21761 22745 22183 22992 21782 22368 21470 22168 21525 22726 22331 22890 22330 22565 21837 22369 21393 22001 21633 22811 22238 23072 21932 22692 21545 22268 21312 22337 21515 22697 22103 22891 22349 22576 21781 22405 21372 22322 22026 22922 21987 23019 21536 22066 21566 21984 21548 22472 22372 22761 16795 17610 17723 18699 17993 18852 18954 19747 19823 26459 24998 25239 23749 24362 22954 23147 22514 22846 22343 23238 22912 23143 22986 23104 21970 22042 21319 21878 22065 23392 23030 23945 22473 23271 22113 21504 21110 21295 21672 22726 23183 23073 23450 23008 23457 21960 21954 22007 20745 21271 21195 21924 22692 22896 22996 23911 22580 23660 21733 22274 21546 21158 21036 21175 22019 22608 22465 22816 22918 22204 22929 21840 22567 21672 22048 21719 22035 21814 22488 22443 22541 22448 22504 22628 22285 22250 22273 21884 22274 21625 21985 21797 22182 22230 22791 22373 22948 22001 22803 21928 22656 21993 22324 21811 21978 21552 22042 21402 22335 21811 22675 22326 22926 22307 22529 22395 22656 22327 22421 22172 22346 21790 22699 21555 22420 21352 22216 21378 22228 21335 22297 21385 22024 21429 22353 21792 22669 22009 22905 22135 22968 22007 23088 21773 22725 21719 22759 21115 22293 21589 22167 21313 22176 21510 22706 22179 22808 22247 22886 22326 22580 22435 22215 21968 22487 21301 22222 21277 22341 21643 22689 22153 23151 21897 23225 21939 22881 21628 22377 21704 22032 21579 22029 21432 22099 21667 22151 21521 22290 21827 22553 19046 20105 20016 20839 20779 21184 20994 21332 21243 21376 23941 23695 23409 23147 23111 22744 22723 22528 22344 22475 22727 22365 21674 21922 20919 21540 20560 21302 20909 21596 21356 22205 22129 22720 22710 23187 22897 23760 22614 23900 21975 23282 21590 22221 21687 21290 21156 20903 21058 20887 20997 21220 21400 22056 22458 22288 22893 22231 22942 22019 22836 21962 22720 22122 22754 22041 22477 21864 22304 22165 21936 21748 21998 21704 21853 21571 22219 21566 22190 21880 22300 22128 22533 22455 22637 22489 22610 22417 22667 22322 22438 22323 22643 22265 22370 22190 22423 22034 22330 21796 22565 21356 22246 21394 22196 21382 22081 21332 22264 21528 22506 21931 22605 22049 23003 22016 22895 22134 23161 21997 23187 21817 22775 21743 22792 21664 22396 21635 22090 21463 22123 21378 22343 21417 22406 21995 22880 22338 22789 22317 22674 22348 22660 22247 22531 22192 22365 22140 22304 22346 22215 22023 22389 21796 22004 21440 22127 21521 21870 21499 22167 21809 22104 21841 22516 22184 22734 22097 22897 22185 23009 22062 22997 22021 23243 21772 23013 21632 22061 21520 21190 21044 20959 20699 21255 21638 22096 21417 22135 22680 22957 23148 23096 23507 22517 23485 22475 23092 21864 22959 21901 22360 21767 22680 21633 22330 21924 21888 21637 21289 21595 21801 21667 22016 21517 22001 21604 22032 21753 22334 22044 22456 22247 22674 22651 22509 22537 22392 22493 22272 22365 22304 22028 22263 21786 22443 21670 21792 21548 21843 21514 22055 21730 22098 21659 22305 21739 22521 22019 22349 22061 22688 22144 22821 22010 23088 21943 23074 21875 22887 21633 22834 21587 22421 21620 22423 21698 22298 21563 22000 21499 22123 21504 22484 21914 22807 22344 22658 22411 22444 22192 22262 21960 22320 21617 22343 21479 22138 21379 22461 21734 22708 21873 23092 22091 23029 21925 23024 21725 22609 21856 22041 21620 22095 21517 22249 21767 22258 21787 22397 22080 22766 22461 22630 22368 22425 22308 22311 21998 22397 21796 22151 21549 21899 21283 21946 21002 21460 20741 21081 20974 21987 22307 23092 22828 23790 22644 23646 21687 22248 21623 21504 21463 20721 20992 20843 21125 21757 21964 22720 23298 22800 23473 22745 23456 21888 22560 21784 22237 21668 21845 21533 22185 22042 22428 22328 22557 22513 22450 22591 22201 22217 21429 21537 22055 21440 22040 21691 21913 21820 22457 22121 22916 22237 22867 21944 22921 21841 22749 21684 22364 21000 22347 21569 22123 21568 22089 21468 22112 21400 22555 21973 22759 22176 22723 22309 22416 22174 22496 21888 8309 9258 11461 11795 13765 13666 15223 14602 15975 14892 30319 28256 27734 26339 26090 25046 25241 24580 24770 24055 24828 24041 24379 23667 23858 23085 23911 11203 13492 13936 15217 15698 16925 16809 18126 17377 30416 28451 28154 26531 26179 25098 25132 24361 24187 23613 24192 23363 24195 23700 24220 24338 23833 24146 14640 15567 16384 15751 16995 16769 17696 18019 19013 28525 28104 26912 27232 25506 26273 24263 24992 23248 23831 22955 22135 22120 21911 21980 21856 22214 17000 18123 18517 19566 19264 20076 19604 20035 19995 19987 25619 25258 24410 24488 24010 24158 23781 23915 23637 23504 23329 23005 22503 22847 22163 22656 22181 19766 20049 21042 20897 21739 20873 22074 20960 21891 20853 24344 23133 23379 22423 23202 22273 23137 22456 23301 22727 23266 22736 23277 22805 23072 22865 22972 22455 22840 22114 22779 21929 22992 21791 22773 21692 22368 21651 22409 21785 22624 21824 22784 22032 22487 21890 22697 22031 22881 22245 22859 22436 23149 22336 23156 22313 23233 22281 23254 22221 23185 22263 22920 21959 23044 21875 22837 21922 22839 22027 23112 21815 22858 21753 22565 21726 21719 21670 21159 21152 20948 21344 21006 21107 21046 21015 20951 21095 21570 21313 21794 21739 22784 22695 22337 22208 22698 22673 22512 22845 22443 22970 22356 22894 22472 22937 22465 22807 22408 22633 22380 22769 22491 22960 22203 23016 22304 23164 22475 22969 22342 22971 22314 23060 22080 22889 21790 23008 21861 22834 21744 22857 21877 22950 21741 22738 21685 22730 21767 22949 21783 22916 21687 23035 21824 22927 21813 22645 21752 22753 21593 22653 22004 22471 21730 22439 21712 22907 21724 22832 21748 22597 22249 22260 21672 22529 21565 22344 21443 22244 21415 22101 21473 22078 21315 22199 21638 22281 21687 22470 22247 22740 22334 22834 22495 22800 22528 22635 22576 22748 22569 22730 22460 22669 22560 22647 22827 22637 22981 22167 22693 21985 23151 22139 22998 21976 22568 21860 22365 21910 21462 21665 21173 21618 21616 21546 21565 21961 21056 21904 21080 21665 20776 21456 20544 21206 20752 21365 21919 21605 22037 21637 22039 21637 22169 21703 21963 21804 21829 21690 21984 21639 22052 21604 22018 21690 21851 21515 22055 21635 21943 21690 22009 21596 22087 21560 22143 21837 22078 21610 22026 21777 22042 21718 22288 21963 22330 21714 22404 21703 22535 21615 22865 21678 23022 21720 22986 21805 22752 21750 22861 21673 22861 21765 23169 21877 23109 21766 23132 21966 23049 21967 22991 22158 22991 22154 22971 22082 22584 21732 22607 21642 22303 21687 22415 21687 22172 21674 22246 21797 22121 21611 22263 21415 22128 21397 22002 21493 22112 21641 22065 21431 22053 21406 22069 21479 22172 21359 22192 21349 21818 21330 21985 21207 21863 21085 21850 21536 21849 21880 21829 22537 21942 23342 22059 23441 22725 23395 22992 22519 22634 22082 21893 21636 21984 21346 21381 21174 21205 21134 21717 22087 21411 22338 21600 22064 21792 21496 22064 22043 22359 22213 22542 22276 22579 22508 22457 22722 22304 22520 22145 22531 21959 22156 21504 22029 21525 22132 21707 22043 21388 22065 21728 22501 21788 22817 21728 23021 21984 9885 10654 12986 12975 14737 14261 15535 15042 16210 30434 29612 27620 27357 25837 26361 13480 15373 15824 17024 17123 18237 18092 18691 18259 30826 29353 28640 26556 26440 25372 16589 16522 18414 18084 19507 18695 20198 19424 20668 19671 29409 27444 27259 25940 25913 18984 19508 19303 19884 19582 20577 20029 20763 20813 21127 27013 26523 25579 25379 23827 24016 20385 20781 21175 21899 21399 23380 22299 23554 22432 24992 23792 23181 22578 23284 23829 23388 24689 23846 24497 24057 23714 23260 22395 21984 21732 21577 22176 22895 22413 24327 23440 23110 22811 22125 22317 22237 22585 22336 23203 22574 23195 22823 22824 22481 22464 21999 22662 22056 22481 22427 22596 22672 22803 22759 22912 22674 22956 22273 22262 21927 22331 22059 22912 22108 23159 22292 23145 22336 22864 22170 22499 21787 22444 21481 22791 22128 22648 22275 22809 22625 22906 22492 23015 22054 22641 21542 22215 21766 22617 21621 23158 21941 23289 22311 23001 22036 22421 21528 22304 21797 22567 22327 22808 22427 22918 21831 22394 21408 22220 21437 22839 21989 23168 22165 22881 21937 22354 21761 22507 22151 22483 22588 22804 22308 
