# Supplementary material for: An Active Feature Selection Strategy for DWT in Artificial Taste
Source: Hindawi journal article supplement (doi:10.1155/2018/9709505), 2018-01-01
Supplement: f1 [file 9709505.f1.zip › blackTea-low-3.txt]

43944 43472 39089 38546 48 11545 16935 19904 20269 21668 21329 22180 22068 22458 21891 22112 21682 22553 22432 22276 22153 21428 23391 21484 22473 21399 23409 21585 22539 21380 23494 21767 23072 21888 22578 22078 22144 23251 21531 22784 21317 23719 22324 22585 22356 22780 22678 22544 22667 22129 22598 22050 22994 22117 22860 22215 23012 21610 22901 22509 22584 22176 22580 22820 22417 22475 22583 22427 22650 22344 22929 22046 22781 21966 23249 21900 22932 21952 23192 21789 22986 22304 22597 22240 22578 22604 22874 22313 22729 22296 22656 21978 23188 21851 23035 21785 23316 22169 23040 22455 22547 22106 22542 22553 22652 22500 22672 22610 22740 22088 23192 21775 23111 21869 23206 21976 22693 22560 22447 22389 22420 22624 22727 22395 22743 22429 22656 22299 23079 21899 22696 21948 23244 22307 22977 22053 23062 22615 22947 22330 22856 22343 22109 23473 21861 23016 21796 23317 22313 23100 21934 23052 22282 22927 22421 22557 22140 22125 23237 21824 22313 21722 23680 21600 22798 21304 23888 21674 23233 21285 23248 22511 22549 22503 22400 22556 22408 22832 22232 22530 22345 22887 22032 22633 12179 17913 18252 19868 19314 20645 19852 20651 19985 21016 27819 25864 24337 23696 23004 23194 23191 22878 22784 23020 22618 22919 22480 23149 22375 22857 22327 23264 21877 23020 21956 23392 22063 23152 21948 23371 22108 23079 22276 23016 22101 22688 22620 22576 22344 22572 22617 22856 22445 22945 22313 22712 22171 23191 22088 22792 22100 23134 21930 22764 21985 23352 22158 23081 22041 23040 22178 22929 22354 22774 22285 22679 22712 22400 22416 22382 22810 22405 22583 22471 22701 22711 22609 22679 22136 22394 22211 23314 21654 22720 21258 23908 21778 23299 22072 22697 21931 22425 23256 21815 22744 21330 23545 22092 22826 22798 21587 23208 21587 23063 22602 22458 22951 22029 22631 22048 23027 22195 22848 22464 22585 22297 22392 22855 22679 22583 22528 22386 22626 22103 23100 21976 23082 22135 22841 22072 22638 22604 22459 22449 22627 22423 22730 22004 23142 21879 22993 21880 22930 22033 22679 22604 22530 22540 22598 22368 22823 22044 23331 21939 23015 22370 22449 22313 22540 22291 22784 22041 23224 22048 22976 22184 22717 22155 22517 22546 22721 22032 23156 21968 23032 22178 22779 22073 22440 22682 22577 22457 22867 21993 22919 22169 18023 19277 20334 21001 21029 21172 21745 20726 21691 29555 26404 23691 23328 24005 22688 23109 23496 21690 23511 22227 22731 22212 21665 23634 22312 22794 23481 21985 23313 22601 21870 22959 21639 23170 22159 21908 23703 22342 22615 22674 22163 22928 22073 22834 22208 22324 22796 22519 22248 23104 22185 22941 22434 22496 22283 22374 22583 22592 22032 23264 21689 22741 22618 22710 22429 23015 21954 23000 22051 22870 22156 22491 22485 22840 21833 23292 21911 22953 22479 22508 22393 22839 22034 22858 21813 23175 22032 22602 22576 22664 22304 23062 21832 22976 22183 22630 22512 22585 22104 22976 21770 22973 22124 22586 22528 22643 21830 23190 22129 22720 22638 22488 22490 22813 21933 22886 22041 22823 22179 22299 22636 22613 21829 23111 22177 22485 22908 22688 22145 23365 21621 23107 22312 22157 22528 21512 22882 22174 21392 23592 21953 22277 23584 22164 22957 23138 21560 23259 22210 21975 22563 21595 22678 22344 21284 23234 22507 22003 23086 22197 22455 22903 22935 22395 23096 22197 22795 22616 22441 22575 22821 21991 22937 22247 22483 22443 22569 22013 22976 22300 22471 22473 22745 21877 23067 22431 22456 22380 22860 21876 23040 16882 20402 20741 21508 21258 21943 21016 22242 21372 21800 25486 24037 22565 23526 22416 22651 22679 22864 22018 23325 22112 22559 22631 22939 21984 22992 22228 22377 22340 22784 21801 23193 21957 22567 22488 22768 21902 22985 22152 22444 22498 22738 21965 22883 22384 22546 22261 22767 22118 22598 22277 22456 21968 22936 22208 22403 22567 22773 21725 23122 22592 21792 22960 22595 21616 23340 22821 21733 23099 23682 21840 22812 23593 22211 22423 23759 21985 22734 23656 22263 21575 23386 22101 21360 22956 22357 22248 22498 22681 22106 22565 22585 22617 22023 22795 22664 22352 22454 23153 22298 22425 22643 22616 21866 22873 22227 22734 22128 22947 22313 22479 22337 23079 22017 22713 22656 23000 22000 23168 22108 22438 22262 22871 21984 22583 22364 22992 21754 23040 22465 22731 21921 23212 22037 22512 21927 22982 22321 22717 22193 23302 22324 22528 22440 22829 21890 22567 22449 23129 21884 22666 22493 22779 21749 22818 22487 23088 21991 22817 22688 22724 22218 22331 22532 23192 22117 22429 22455 22837 22106 22425 22528 22949 22166 22469 22689 22710 22084 22080 22597 23624 22215 21850 23224 22376 21433 21979 22983 23599 21788 21701 22954 20717 21360 21110 21760 23360 21492 20978 21710 22770 26024 22760 22903 24107 22521 21867 21953 22720 23208 22258 22298 22507 22841 22604 22436 22460 23010 22296 22263 22320 22960 22573 22627 22097 23059 22333 22722 22017 22700 22734 22744 22112 22532 22332 23257 22102 22489 22096 23024 22427 22586 21901 22653 22397 23180 21943 22534 22211 23120 22391 22692 21967 23053 22277 22904 21926 22608 22421 23023 22465 22925 21845 23121 22244 22994 21892 22668 22632 22698 21925 22493 22216 23380 22057 22619 21711 23065 22486 23125 21853 23001 22310 23018 22193 22339 22003 22976 22673 22600 21762 22775 22448 23181 22500 22407 22131 22901 22711 22630 22112 22455 22212 23162 22518 23000 21861 21842 22875 22794 22986 21960 21375 22350 23050 23674 21789 21459 21585 22811 23664 22337 22464 22684 21533 22986 23000 23324 22147 21420 21675 22222 23126 22809 22957 21913 22284 22065 22996 22790 22647 22177 22355 22056 22442 22641 23138 22328 22571 22173 22517 22440 22918 22567 22673 22040 22456 22039 22885 22447 23160 22093 22404 21876 22629 22469 22739 22388 22702 21952 22579 21852 22755 22307 23254 22087 22992 21965 22471 21825 22544 22170 23055 21033 22144 21841 22441 21512 22288 21931 22944 22072 22928 22738 22981 22080 22551 21977 22781 22535 22992 22445 22769 22022 22613 22027 22978 22336 23140 22105 22695 22018 22464 22179 22977 22756 22694 22301 22436 21890 22469 22288 23083 22485 23117 22191 22840 22160 22353 21740 22552 22576 23068 23400 22325 21933 21921 21514 22710 22700 23639 22591 23170 21984 21440 21553 22458 22881 23138 23597 22253 22448 22128 21200 21700 21560 21964 22775 23751 22784 22635 22568 22038 22460 21944 22663 22594 23083 22586 23066 22246 22871 22295 22572 22312 22323 21975 22380 22001 22813 22576 22860 22619 22728 22553 22749 22272 22484 21792 22506 21852 22434 22134 22908 22421 23238 22304 23206 22112 22925 22004 22897 22040 22455 21905 22517 21867 22791 22375 22977 22573 22857 22498 22912 22295 22813 21958 22626 21796 22444 22151 23160 22535 23200 22147 23049 21991 22840 22375 22557 21817 22480 21815 22823 22168 22963 22570 22957 22668 22749 22407 22585 22292 22726 21986 22503 21932 22439 22067 22648 22528 22727 22471 23125 22509 23403 22287 23036 22272 21929 21799 21385 21455 22168 22003 22550 22876 23296 22888 23399 23559 22865 23605 22535 23229 22144 22888 22109 21813 22183 21408 21744 21357 21708 22299 22099 22631 22567 22787 22608 22764 22841 22645 22640 22391 22393 22860 22119 22608 21984 22414 21850 22397 21893 22434 22080 22471 22289 22826 22368 23121 22395 23260 22171 23001 22034 22737 22025 22826 22073 22689 22023 22448 21749 22382 21786 22571 21777 22656 22119 23030 22504 22972 22621 23018 22545 22800 22454 22724 22366 22774 22041 23176 22151 22680 22049 22720 21957 22372 21760 22518 22004 22776 22260 23072 22198 22863 22298 23188 22329 23235 22404 23194 22340 23109 22177 23061 22024 22838 22114 22587 22518 22701 22593 22371 22064 22403 22160 22272 21919 22230 21704 22295 21576 22116 21471 22170 22071 21780 21571 22104 22045 22557 22337 23127 22650 22932 22803 23061 23247 23176 22432 22893 22793 22912 22607 23105 23074 23101 22988 23216 23337 23117 22806 22541 23079 22578 23133 22485 23100 22388 23056 22575 23055 22548 23093 22583 23042 22455 23064 22461 23074 22436 23196 22490 23033 22516 23156 22464 23187 22477 23280 22448 23194 22423 23224 22425 23205 22356 23217 22384 23082 22406 23090 22364 23149 22292 23146 22341 22902 22240 22906 22322 22935 22377 23099 22277 22978 22264 23186 22338 23248 22372 23287 22348 23026 22341 23078 22413 23025 22357 22834 22230 22919 22263 22978 22244 23096 22300 23127 22391 23226 22411 15938 18259 20007 19832 20686 20304 21084 20501 21139 35497 27776 24713 24504 23276 23795 22986 23479 22808 23386 22634 23481 22669 23444 22706 23773 22707 23880 18036 21204 21048 22396 21640 22737 21844 22871 21498 31798 25752 25344 23866 24406 23252 24235 23283 24052 23271 23898 23215 23939 23181 23849 23264 23737 14148 20104 21303 21645 22096 21901 22238 21952 22251 22019 27121 23929 23314 22568 22868 22366 22700 22183 22613 22192 22743 22156 22712 22044 22613 22048 22432 17537 20832 20966 21865 21417 22211 21613 22205 21679 22324 24154 23360 22401 22930 22201 22712 21976 22732 21879 22585 21966 22629 22001 22568 21991 22628 22106 21206 21475 22507 21702 22548 21762 22610 21872 22612 21760 23715 22358 23161 22167 23205 22222 23040 22275 23146 22205 23148 22052 23089 22038 23031 22026 23067 22063 23092 22100 23210 22284 23300 22380 23269 22484 23085 22439 23228 22388 23186 22466 23191 22374 23201 22366 23220 22375 23287 22309 23188 22284 23287 22313 23588 22480 23581 22622 23720 22645 23950 22492 23993 23009 23605 23056 23606 23034 23529 23023 23585 23061 23131 22912 23180 22885 22838 22656 22857 21642 21641 21207 21732 21349 21741 22028 22096 22324 22153 22387 22029 22279 22308 22392 22393 22350 22176 22516 22287 22493 22252 22350 22048 22640 22245 22792 21994 22884 22257 23104 22326 23232 22352 23133 22487 23332 22368 23172 22519 22973 22395 22885 22229 22656 22180 22508 21821 22428 21700 22568 21792 22678 21734 22604 21805 22607 21948 22700 22342 22707 22316 22624 22252 22632 22289 22752 22455 22811 22458 22865 22536 22931 22578 23001 22487 22903 22496 22884 22217 22807 22023 22530 21749 22427 21850 22510 22070 22663 22421 22641 22080 23017 22134 23040 22200 23081 22349 23192 22356 23159 22450 23080 22480 22626 22167 22439 22020 22390 21912 22272 21933 22384 21871 22535 22135 22705 23219 22780 23512 23146 23521 23273 23181 23076 22509 22621 22208 22184 21420 21496 21621 21448 21989 22512 21863 23260 22256 23899 23069 23801 23032 23424 23057 22865 22755 21988 22281 21909 22276 22134 22396 22632 22701 22188 22701 22298 22976 22416 23059 22375 23098 22528 22823 22265 22548 22066 22429 21942 22470 22016 22768 22049 22679 22272 22601 22381 22711 22597 22921 22760 23064 22519 22990 22156 22668 21725 22455 21984 22647 21943 23064 22045 23192 22168 23219 22478 22864 22198 22724 21929 22455 21782 22720 21989 22797 22080 22692 22528 23031 22505 22933 22112 22647 21804 22334 22037 22703 22129 22988 22147 23207 22433 23032 22170 22504 21834 22503 21881 22612 22384 22678 22645 22912 22557 22870 22170 22376 22046 22473 22158 22860 22226 23088 22313 23064 22528 22761 22110 22208 21836 22325 22020 22402 23399 23204 22528 22240 21496 21425 21916 22708 22057 23852 22912 23441 21957 21760 21175 22012 21968 22101 23319 22625 23639 23260 22609 22266 21584 21345 22027 22244 22027 23722 23127 22938 22865 22423 22560 21809 22278 22225 22603 22231 22909 22473 23049 22604 22746 22264 22361 22055 22570 22503 22669 22599 22823 22665 22912 22317 22516 21811 22309 22183 22746 22080 23139 22324 22889 9648 17425 18471 19776 19344 20583 19936 20728 20545 21105 29831 26086 23729 23591 22442 23533 17574 20979 20813 21894 21280 21576 20979 21640 20993 30892 25369 24567 23332 23497 22369 18210 20013 21662 21213 22503 21548 22756 21932 22101 21295 25325 23310 23426 22980 23332 18185 21479 21143 22068 21573 22520 21782 23009 22066 22452 24292 23424 22451 22661 22772 22934 21801 22657 21974 22200 22001 22595 22052 23096 22446 24708 22752 22700 22167 22808 22799 23099 22421 22682 21791 22455 22233 23219 22605 23316 22359 21846 21422 22416 23081 23040 23193 21890 21640 22192 22147 23972 23081 22120 21317 22010 21879 22191 23697 23207 21981 21532 22043 22480 22282 23860 22993 22145 21305 22153 22277 22261 23712 23189 22292 21743 22041 22362 22625 22899 22900 22408 22577 21892 22325 22195 22922 22492 23001 22560 22318 22081 22272 22731 22816 22722 22841 22003 22296 22288 22736 22208 23139 22442 22999 22217 22485 21860 22551 22503 22802 22756 22992 22132 22448 22009 22636 22100 23164 22413 23018 22153 22440 21956 22688 22392 22682 22615 22951 22095 22536 21885 22836 22064 23280 22396 22897 21934 22614 
21002 22496 21900 22407 20784 22423 20832 23210 20647 21745 21671 21851 22273 21384 23092 20780 21955 20952 22909 21440 21297 22381 21088 22553 20949 23338 20839 21700 21073 21805 22362 21542 22624 21364 22071 21589 22272 21806 22425 21287 22397 21322 21997 21776 21841 21376 21829 21776 21801 21679 22089 21613 22009 21497 22412 21154 22121 21362 22624 21259 22363 21378 22326 21531 22098 22036 21604 21729 21653 22167 21874 21792 21788 21841 22001 21651 22487 20940 22108 20885 23264 20928 22336 21849 21639 21476 21235 22984 20944 22136 21165 22519 21554 21848 22770 21036 21900 20707 23377 21494 22304 21826 21904 21585 21242 23140 21219 22281 21447 22496 21804 22023 22140 21682 21963 21638 22219 22223 21882 22282 21633 22071 21546 22496 21184 22304 21487 22631 22006 22270 21698 22103 21573 22005 21988 21773 21726 21917 22048 21844 21773 22029 21933 22090 21588 22575 21217 22188 21273 22633 21281 22183 21361 22720 21122 22430 21104 22699 21271 22525 21323 22512 21515 22500 21391 22372 21365 22276 21714 22295 21569 21936 21911 21854 21610 21919 21898 22007 21760 21981 22005 22072 21881 22295 3783 8648 9783 11831 11515 12928 12666 14174 13250 14435 31132 29343 26339 25881 24153 24455 23152 23508 23008 22322 22597 21863 23284 21780 22681 21416 23127 21843 22534 22085 22155 21824 21584 22964 21238 22084 20729 23331 21077 22467 20934 23027 21323 22422 22236 21627 21484 21385 23015 21537 22375 21357 22505 21605 22289 21490 22421 21792 22345 21670 22187 21751 22061 22175 21834 21760 21961 22216 21776 21973 21817 22209 22276 21954 22325 21771 22080 21495 22520 21383 22155 21278 22843 21243 22336 21159 22684 21328 22543 21475 22391 21504 22192 21920 21881 21688 21942 22133 22225 21848 22327 21828 22220 21314 22826 21274 22493 21843 22035 21728 21719 22179 21991 21752 22128 21744 22263 21547 22656 21239 22503 21312 22634 21556 22109 21979 21730 21760 21799 22070 22022 21595 22680 21384 22469 21396 22613 21532 22305 21985 21497 21865 21367 22232 21981 21592 22739 20874 22555 20856 22652 20705 21960 22822 21066 22313 21282 22263 21654 20931 23253 21483 21945 22413 21019 22283 20907 22611 21216 21920 22131 21747 21940 22186 21737 22056 21440 22252 21697 22126 22233 21628 21990 21821 21925 22107 21397 22663 21314 22310 22061 4060 10199 12757 14235 15325 15268 16928 15951 17360 16698 32585 28154 26380 25126 24443 22910 23933 22348 23241 22403 22330 22197 22298 22016 22382 21613 22876 21661 22329 22044 21976 21930 22569 21493 22391 21362 22696 21245 22280 21916 22022 21814 22332 21462 22400 21510 22289 21559 21876 21973 22136 21539 22704 21372 22429 21630 22192 21626 21801 21962 22065 21400 22606 21004 22103 22100 21999 21869 22413 21060 22425 21549 21925 22209 21301 21877 21644 20673 23220 21304 21935 22876 21275 22389 21906 21323 22087 20845 22597 21415 21154 23084 21576 21814 23076 21052 22304 22443 21286 22340 21851 21809 21972 21863 21815 22007 21568 22128 21662 21699 22098 21709 21609 22513 21465 22283 21784 21712 22003 22025 21575 22286 21333 22215 21728 21863 21814 22098 21282 22609 21691 22286 21984 21803 21805 22223 21267 22352 21229 22500 21531 21941 22118 21796 21341 22741 21431 22306 21787 21992 21768 22229 21359 22331 21298 22176 21603 21975 21840 22171 21128 22496 21439 21918 21985 22204 21393 22760 21496 22239 22010 21996 21780 22653 21490 22209 21938 21819 21841 22472 21504 22325 22008 21774 21865 22592 21547 22151 22314 21487 21984 22823 10676 15676 16470 16487 18205 18184 17559 19276 18257 18601 28237 25549 23525 24150 22642 22176 22557 21641 21896 22394 21232 22201 22205 22038 21256 22036 22033 21531 22416 21641 22007 21906 21872 21747 22145 21712 21872 21882 21850 21573 22261 21590 21834 21913 22200 21383 22313 21669 21776 21959 22297 21373 22427 22042 21905 21895 22437 21309 22448 21962 21969 21805 22480 21168 22312 22058 22225 21706 22701 21376 22034 22041 22064 21429 22742 21253 22209 22074 22800 21206 22658 21537 22084 21479 22272 21446 22058 21846 22242 21120 22483 21701 21783 21702 22594 21417 22181 22099 22145 21352 22327 21613 22000 21510 22249 21729 21776 21893 22359 21222 22208 22208 22092 21552 22410 21513 21748 21664 22199 21199 21434 22212 22171 20785 22544 22819 21376 21288 23236 21550 21010 21878 22142 21238 21239 22170 23110 21362 21373 22950 21380 20634 22217 22066 21632 20869 22181 22612 21492 21798 22019 22016 21621 21681 22022 22209 21749 21798 22275 21943 21790 21808 21733 22641 21601 21962 21737 22195 21751 21786 21810 22532 21197 21893 22012 22063 21419 21902 21836 22627 21904 21966 21783 22158 21401 21942 21786 22746 21504 21904 21855 13661 16338 18300 18807 20331 19345 20011 19601 20772 20102 27468 24680 24603 22614 22543 21707 22732 22411 22496 21336 22441 21722 22512 21446 22283 22092 22241 21342 22029 21856 22663 21557 21904 21900 22185 21803 21816 21717 22532 21654 22133 21236 22228 22055 22077 21440 21859 21947 22653 21553 21376 21639 22510 22780 21825 20592 21861 22340 23121 21303 21025 21943 22377 22408 21323 20775 22345 22027 22621 21237 20841 21747 22568 22540 21475 21041 22869 21824 21286 21760 21832 22548 21723 21888 21482 22226 22343 21949 21451 22007 21897 22345 21727 21628 21437 22181 22132 21964 21251 22023 21890 22520 21895 21639 21623 22350 22089 22099 21516 21984 21629 22621 21641 22338 21424 21984 21748 22296 21609 22083 21292 22382 21712 22593 21399 21829 21253 22349 22073 22115 21440 21866 21376 22517 21568 22497 21466 21910 21564 22464 21996 22371 21792 22237 21381 21972 21716 22817 21445 22240 21068 22235 21544 22499 21985 22141 21450 21893 21387 22416 21749 22510 21347 21788 21302 21920 21865 22354 22006 22135 21223 21785 21678 22689 21745 22428 21646 21682 20788 21433 21522 22417 22933 21737 21628 21604 20545 21031 21925 22183 22272 23393 18389 19927 19776 19925 20333 21495 21925 21659 21953 25543 22945 22065 21507 22311 22345 22422 22296 21927 22101 21495 21710 21847 22233 22108 22480 21610 21868 21512 21877 21959 22275 22103 22086 21747 21922 21410 21938 21865 22580 21739 22442 21434 21877 21483 21729 21402 22299 22092 22375 21960 22130 21335 21790 21344 22457 21745 22753 21536 22291 21456 21894 21415 22457 22066 22380 21964 22141 21281 21975 21112 22000 21676 22477 21809 22653 21472 22329 21654 21783 21205 22336 21680 22472 21989 22444 22016 22325 21741 22300 21267 21834 21287 21824 21577 22299 21845 22631 21672 22583 21580 22113 21607 22017 21469 21812 21400 22001 21325 22232 22076 22416 22720 22243 22311 21661 21676 21602 20621 21347 20560 20975 21058 21651 22060 22771 22267 23345 21624 22616 21368 21509 21220 20869 20869 21006 21238 22332 22856 22087 22632 21632 22277 21611 21968 21564 21626 21382 21929 21715 22058 22135 22137 22156 22085 21946 21893 21700 22227 21431 21786 21324 21743 21459 21950 21720 22341 21799 22689 21810 22612 21554 22439 21416 22119 21325 21821 21220 22019 21516 22374 21788 22454 21968 22339 22057 22260 21948 21981 21927 22067 21493 21959 21341 22005 21080 21868 21294 21879 21377 22272 21791 22408 21761 22569 21640 22868 21515 22541 21330 22365 21155 22048 21223 21900 21287 21765 21313 22040 21382 22016 21545 22281 21888 22376 21979 22327 22211 22061 21896 22041 21648 22007 21412 21804 21465 21668 21143 21219 20747 21031 20915 21244 21281 21728 21735 22472 22320 23090 22190 23219 21561 22795 21356 22481 21352 21967 21345 21030 20971 20932 21236 20873 20867 20695 20852 21566 21968 21775 22215 21832 22505 21891 22438 22101 22418 21831 22400 21789 22345 21677 22196 21585 22103 21595 22002 21465 21700 21320 21712 21290 21738 21207 21854 21206 21852 21319 22053 21476 22144 21653 22363 21868 22394 21912 22380 21646 22328 21859 22464 21945 22456 22044 22453 22053 22424 22035 22257 22114 22423 21926 22338 21967 22409 21943 22368 22004 22373 22019 22322 22085 22252 22139 22157 21853 22282 21980 22147 21904 22213 21871 22172 21907 22149 21985 22169 22007 22235 22057 22256 22006 22038 22085 22171 22121 22061 22072 22108 22041 21962 22123 22112 22085 22003 22181 22128 22370 22220 22746 22323 22810 22405 22882 22569 22939 22523 23030 22560 22768 22445 22902 22600 22904 22529 22972 22439 22954 22460 22989 22289 22949 22071 22955 22529 22843 22519 22931 22033 22441 21856 22576 21898 22468 22000 22492 21908 22436 21891 22492 21938 22370 6644 10900 11940 13595 13479 14667 14196 15461 14842 36016 30223 28231 25585 25480 23735 24144 22828 23382 22282 23091 22073 22799 21789 22676 21642 22557 3821 10875 13073 15881 15645 17385 16688 18007 17156 18208 32408 29336 26052 25541 23730 24184 22681 23501 22091 23248 22043 23131 21925 22968 21783 22903 21728 10452 14002 16960 17287 18884 18211 19672 18779 20144 19251 30277 26487 25530 23729 23769 22648 23203 22354 22837 22173 22889 22029 22576 22049 22452 21847 22176 14349 17773 18387 19707 19591 20480 20144 20832 20416 20979 26577 24957 23665 23385 22633 22315 21744 21952 21389 21416 20995 21307 20918 21205 20800 21233 20760 18169 18850 20032 19729 20407 20041 20569 20151 20752 24869 23572 22017 22230 22465 21606 22126 21840 22293 21544 22073 21792 22134 21712 21920 21767 21863 21852 21957 21735 22227 21792 22403 21691 22350 21628 22515 21742 22560 21639 22389 21504 22421 21624 22528 21679 22599 21595 22520 21545 22388 21560 22549 21664 22388 21585 22200 21459 22381 21373 22455 21453 22485 21473 22720 21520 22662 21479 22664 21607 22612 21675 22745 21723 22716 21733 22705 21685 22889 21842 22437 21594 22176 21592 22210 21729 22309 21807 22120 21355 22012 21382 22035 21285 22080 21220 21996 21225 21926 21255 21864 21227 21778 21297 21949 21487 21869 21418 21962 21713 21958 21914 22050 22004 22209 21969 22083 22233 22130 22073 22373 22152 22401 21987 22432 22347 22109 21067 21883 20977 21248 20765 21034 20813 20943 20683 20741 20796 21016 21264 21221 21228 21203 21399 21361 21255 21632 21369 22250 21299 22731 21405 23123 21824 23328 22316 22275 22381 22150 22396 22002 22295 21880 22047 21721 21865 21563 21639 21488 21511 21596 21894 21769 21926 21539 22114 21467 22424 21546 22340 21643 22631 21689 22539 21918 22413 21785 22122 21530 21968 21379 21832 21258 21792 21224 21993 21284 22137 21633 22093 21703 22237 21901 22369 22077 22469 22038 22558 21869 22242 21516 22208 21333 21808 21156 22084 21533 22413 21464 22552 21498 22595 21495 22627 21820 22759 21659 22068 21307 22020 21201 21866 21137 22054 21214 22008 21273 22426 21655 22099 21969 22037 22108 22392 22029 22329 21792 22096 21424 21919 21348 21575 21280 21839 21419 21872 21535 22221 21505 22504 21703 22715 21915 22924 21968 22097 21634 21136 20726 20983 20631 21680 21306 21607 22087 21856 22987 22458 22545 22360 21504 21538 21006 20901 20865 20969 21159 21362 21334 23104 22176 23190 22230 21904 21879 21655 21764 21425 21726 21674 22224 21703 22513 21959 22281 21894 21936 21555 21609 21431 21866 21616 22032 22116 22206 22086 22347 21506 21789 21273 21801 21661 22184 21425 22469 21656 22741 21744 22314 21596 21798 21238 21757 21340 22088 22007 22410 21837 22183 21176 21857 21324 22338 21336 22464 21703 22458 21606 21803 21187 21842 21320 21799 21709 22200 21943 22479 21769 22327 21303 21736 21343 21892 21491 22528 21495 22537 21842 22309 21453 22023 21113 21881 21349 22189 21852 22213 21881 22441 21730 21884 21281 21863 21381 22090 21488 22377 21677 22520 21820 22376 21559 21770 21252 21703 21512 22016 22096 22337 2903 9440 10816 12961 12830 14087 14007 14809 14969 16643 33077 30275 26896 24869 23022 23561 11583 14045 17123 17347 18404 18193 17132 17304 17120 32605 28473 27821 25556 25008 23344 12323 14793 17009 17657 18520 20046 19667 20920 19832 31689 27808 25787 24233 23799 23406 15489 18060 19399 19446 19914 20137 20779 20505 21223 20882 26985 24527 23629 22766 22955 18269 20002 20755 21349 20807 21165 20984 21429 21029 22096 24864 24050 22696 22600 21995 22659 22489 22827 22118 22208 21569 22155 21403 22769 21899 22811 21778 22050 21308 22011 21971 22500 21709 22208 21362 22227 21585 22772 21825 22214 21424 21834 21559 22215 22152 22455 21397 22053 21376 22357 21556 22757 21795 22252 21228 22029 21586 22091 22125 22512 21774 21953 21457 22073 21659 22753 21753 22364 21452 22005 21280 22201 21937 22428 21852 22306 21297 21923 21447 22633 21743 22608 21698 21954 21376 21964 21671 22076 22092 22331 21805 22175 21401 21799 21402 22595 21707 22602 21709 22114 21475 21829 21443 22046 21999 22294 21833 22090 21065 21600 21732 22560 21869 23065 21948 21227 20669 21481 21747 21769 23096 22645 21707 20930 
21728 21402 21892 21689 21520 21678 21846 21366 21907 21325 22167 21280 22288 21111 21855 21417 21931 21511 21872 21753 21560 21637 21646 21757 21722 21266 22023 21363 22179 21306 22275 21309 21799 21453 21898 21722 21777 21783 21526 21431 21672 21760 22099 21321 22296 21237 22112 21096 22138 21493 21645 21721 21521 21541 21600 21629 22048 21399 22359 21163 21875 21177 22066 21689 21416 21937 21411 21529 21728 21514 22087 21248 22244 21303 21766 22232 21258 22022 21189 22192 21792 21979 21748 21545 21576 21601 21873 21844 21737 21802 21556 21733 21339 22253 21204 22120 21144 22227 21827 21933 21672 21659 21497 21545 21828 21795 21788 21734 21567 21792 21312 22427 21320 22169 21206 21926 21335 21660 21805 21716 21719 21588 21991 21893 21755 21847 21638 21796 21339 22208 21159 21934 21208 22357 21232 22147 21248 22216 21562 22218 21674 21525 21528 21206 22690 21219 22190 20755 22674 21436 22414 20852 22667 21553 22306 21446 21941 21435 21666 22088 21514 21463 21011 22648 20919 21893 20729 23023 20888 22168 21333 22108 21618 21814 21682 21915 21657 21774 21751 21733 21602 21671 22001 21408 14603 16587 18316 18059 19004 18560 19758 19228 19678 31223 25765 23300 22824 22360 22032 21729 21824 22025 21638 21881 21730 21889 21806 21625 21824 21609 21702 21440 22167 21198 21872 21135 22172 21144 21996 21260 22226 20753 22044 21397 21936 21293 21894 21769 21539 21584 21550 21973 22247 21660 21879 21488 21677 21357 22035 21431 21868 21417 22120 21304 21893 21167 22313 21225 22073 21277 22112 20889 22075 21495 21921 21464 21819 21856 21632 21611 21569 21940 21718 21702 21418 22013 21543 21890 21633 21556 21353 21472 22272 20925 22329 20480 22951 21056 22469 21267 22053 21186 21646 22365 21132 21828 20720 22485 21480 21809 22683 20992 22587 21351 21863 21580 21672 21830 21433 21686 21415 22130 21571 22011 21739 21592 21559 21499 21994 21651 21840 21696 21575 21715 21516 22248 21495 22077 21512 21833 21402 21664 21876 21697 21873 21704 21607 21733 21304 22257 21238 22152 21389 21868 21349 21681 21911 21696 21713 21794 21463 21733 21088 22268 21312 21829 21746 21737 21749 21779 21636 21806 21237 22232 21393 21991 21522 21703 21560 21659 21669 21829 21156 22328 21321 22185 21493 21776 21533 21492 21889 21844 21707 22226 21308 13722 17701 19336 19542 19863 20245 20138 20234 20828 19681 26628 22944 23278 21875 21667 22785 21851 21573 22768 21211 22531 21549 21243 21953 20679 22436 20788 20920 23027 21216 22230 22225 21056 22325 21024 21878 21491 21039 22048 21655 21796 21958 21299 21903 21616 21401 21712 21445 21736 21617 21267 22077 21299 21879 21680 21540 21718 21595 21750 21772 21239 22101 21385 21603 21909 21768 21679 22044 21235 22086 21492 21633 21469 21691 21376 21956 21131 22291 21318 21752 21923 21792 21726 22017 21295 21926 21300 21987 21381 21634 21695 21722 21480 22312 21450 22056 21649 21564 21773 22089 21239 22230 21400 21719 21472 21648 21298 22023 21162 22023 21421 21601 21945 21913 21539 22104 21162 22153 21654 21644 21693 21750 21608 21966 21223 22072 21444 21435 21812 21610 21203 22999 21209 22263 22009 21040 22332 21290 21425 22038 20800 22289 21270 20953 22721 21330 21523 22872 21149 22257 22016 20999 22299 21556 21149 22342 21714 21474 21863 21217 21783 21539 21440 21912 21697 21331 22038 20944 21651 22048 21666 21719 21989 21660 21816 21865 21703 21737 22095 21504 21952 21851 21721 21670 22057 21302 21819 21936 21827 21654 22163 21298 18510 19672 20303 20612 20955 20387 21297 20704 20987 27690 23960 22203 22472 21740 21786 21696 21846 21274 22036 21253 21939 21589 21746 21155 22065 21581 21594 21731 21804 21171 22077 21332 21721 21577 21767 21155 22117 21291 21737 21650 21847 21159 22163 21445 21621 21840 21950 21181 22135 21536 21543 21804 22151 21292 22116 21843 21649 21737 22592 21192 22026 22340 21431 21857 22967 21261 21843 22704 21591 20605 22944 21143 20794 22697 21372 20801 22880 21156 20776 22289 21690 20992 21322 22288 21485 20923 21963 21748 21224 21879 21840 21539 21915 22029 21628 21664 22055 21622 21280 21752 21712 21543 21365 21917 21511 21432 21781 21969 21260 21895 21949 22183 21329 22245 21447 21504 21812 21865 21249 21699 21667 21901 21194 22149 21654 21820 21390 22265 21392 21636 21768 21927 21372 21664 21782 22220 21305 21786 21860 21792 21062 22048 21453 21782 21247 22129 21751 21917 21143 22068 21481 21802 21306 22188 21513 21667 21418 22277 21281 21622 21163 21994 21896 21664 21152 21954 21619 21866 21251 22036 21793 21892 21344 22221 21440 21600 21107 22114 22103 21667 20832 22215 21781 21076 20981 22532 22461 21315 20705 22308 21888 17518 19329 21067 22119 20854 20149 21037 21984 21838 20788 23854 23656 21728 20718 21472 22533 22157 20930 21312 21942 21815 21888 21479 21644 22052 21541 21333 21570 21862 21921 21439 21575 21858 21786 21395 21520 21600 22148 21472 21651 21346 21985 21893 21718 21184 21684 21779 21997 21401 21696 21853 21947 21720 21742 21232 22091 21542 21910 21406 21691 21753 21927 21507 21775 21475 22144 21448 21792 21200 21618 21639 22107 21525 21743 21516 22369 21357 21667 21161 22008 21799 21753 21160 21657 21712 22279 21744 21636 21573 22092 21526 21746 21315 21972 21760 22183 20797 21470 21463 22080 21634 21895 21229 22022 21696 22105 21295 21649 21176 22066 21997 21799 21180 21350 21256 22592 21680 21656 20917 21218 22117 22394 22104 21344 20653 21736 22439 22939 21115 20906 20853 21705 22540 21993 21498 21256 20920 22232 22246 22947 21519 21514 21443 21437 21805 21854 22016 21496 21477 21320 21860 22049 21895 21853 21544 21370 21521 21767 22173 21628 21968 21469 21463 21511 21867 21892 21849 21665 21877 21168 21701 21772 22268 21458 21728 21472 21491 21268 21974 21909 21995 21708 21790 21236 21625 21357 22002 21762 22318 21538 22062 21373 20528 20701 21626 21517 21842 21613 21626 21276 21821 23127 22209 21815 22375 21655 22247 21456 21776 21357 21711 21358 22138 21857 21924 21627 22103 21159 21583 21626 22272 21600 22146 21383 21565 21171 21972 21859 22027 21879 21735 21585 21870 21167 21578 21353 21969 21720 22391 21488 21969 21166 20984 20968 22112 22552 22118 22486 21337 21057 21089 21032 21927 22394 22983 21405 21943 21233 20745 20767 21607 22017 22615 22685 22255 22609 21367 21193 21553 21472 21656 21979 22017 21844 21862 21656 21696 21618 21385 21589 21362 21385 21711 21929 21813 22186 21725 22225 21506 21783 21590 21481 21372 21402 21149 21664 21544 22104 21962 22055 21927 21920 21776 21701 21351 21795 21149 21616 21288 21800 21440 21894 21769 22312 21613 22186 21447 21897 21165 21687 21381 21612 21184 21748 21348 22087 21815 22145 21809 21863 21499 21781 21175 21666 21097 21634 21367 22030 21743 22387 21612 22359 21373 22165 21328 21897 21359 21479 21329 21600 21165 21862 21671 22050 21894 22056 21932 21984 21761 21776 21674 21722 21261 21585 20887 21184 21015 21658 21837 22715 22368 22912 21797 22822 21376 21976 21196 21760 20521 21004 21116 20684 20997 20931 20868 21015 21152 21985 21971 22465 22464 22446 22560 21719 22096 21520 21825 21447 21597 21392 21339 21461 21450 21389 21654 21521 21866 21848 21984 21888 22016 21936 22008 21926 21746 21882 21701 21801 21724 21371 21817 21134 21511 21271 21608 21457 21620 21463 21638 21613 21947 21696 22205 21778 22236 21685 22315 21543 22169 21353 21981 20825 21639 21277 21555 21319 21570 21189 21703 21280 21977 21260 21806 21421 22040 21504 22089 21881 22118 21867 21873 21667 21847 21644 21897 21665 21775 21419 21746 21223 21826 21199 21743 21212 21619 21188 21563 21276 21649 21582 21674 21353 21946 21671 22027 21682 22159 21831 22280 21879 22273 21796 22677 21760 22850 21714 22784 22092 22961 21781 22709 21515 22427 21159 22465 21166 22231 21239 21867 21345 22531 21296 22279 21250 22231 21113 21913 21155 21913 21141 21452 21411 21669 21596 21552 21710 21466 21016 21440 21516 21451 21333 21443 21604 21542 21632 21644 21609 21568 21594 21472 21760 21371 21743 21483 21965 21451 22118 21317 21872 21159 21714 21381 21718 21443 21763 21389 21763 21440 21774 21590 21800 21440 21738 21562 21746 21557 21814 21716 21786 21701 21824 21660 21778 21568 21765 21532 21827 21575 21825 21480 21834 21360 22272 21604 21738 21568 21728 21601 21716 21716 21865 21610 21881 21554 21770 21492 21797 21477 21723 21360 21753 16555 18453 18855 19456 19302 19749 19456 19532 19661 29063 24364 23114 22203 22381 21512 22030 21415 22009 21287 21751 21155 21872 21001 21505 20908 21285 11905 17634 18585 20000 19343 20205 19691 20338 19552 20253 25467 23405 21745 21894 21064 21702 20885 21483 20840 21383 20985 21367 21081 21575 21249 21317 21228 16075 19344 20117 20743 20597 21029 20793 21072 20804 21361 24617 23214 22337 22449 21852 22168 21820 22241 21640 22071 21575 22092 21633 22160 21724 22130 21793 19440 20429 21478 21184 21867 21274 21906 21261 21772 27265 23800 22187 22569 21738 22376 21775 22325 21729 22261 21687 22275 21754 22214 21707 22153 21639 22052 20253 21112 21074 21452 21191 21548 21181 21644 21172 23623 21925 21958 21357 21583 21159 21544 21208 21649 21173 21448 21075 21595 21162 21701 21286 21579 21206 21629 21228 21808 21138 21705 21146 21659 21177 21947 21280 21761 21353 21699 21191 21803 21340 21644 21216 21864 21255 21805 21164 21635 21152 21656 21173 21547 20882 21400 20689 21376 20681 21393 20599 21223 20700 20889 21265 21440 21424 21325 21616 21315 21454 21356 21768 21335 21911 21454 22102 21525 22241 22501 22598 22484 22817 22530 22773 21958 22112 21841 22137 21768 22069 21805 21735 21687 21728 21788 21604 21717 21715 21730 21698 21783 21770 21527 21527 21362 21527 21273 21504 21261 21664 21233 21915 21486 21249 21351 21703 21448 21686 21649 21697 21768 21751 21798 21816 21847 22000 21819 22118 21783 22181 21775 22145 21722 22048 21578 22054 21128 21671 21280 21667 21185 21660 21241 21709 21260 21584 21275 21589 21373 21632 21723 21772 21424 21870 21360 21986 21297 22131 21315 22245 21573 22339 21722 22288 21671 21925 21437 21880 21401 21575 21221 21561 21153 21696 21203 21697 21198 21707 21328 21751 21352 21775 21820 21939 21936 22088 21847 22133 21776 22023 21677 22027 21397 21732 20711 20936 20971 20854 21157 21414 21136 21940 21144 22411 21440 22641 22096 22934 22439 22683 22283 21463 20973 21056 20583 21216 20705 21335 20982 21391 21592 21319 22316 21566 22183 21769 22140 21796 21841 21700 21618 21562 21477 21293 21303 21319 21519 21301 21723 21399 21591 21874 21872 22005 22023 22054 22098 21960 21981 21639 21769 21324 21696 21248 21591 21363 21573 21568 21768 21348 21871 21388 22187 21524 22215 21744 22064 21527 21754 21269 21560 21120 21624 21270 21696 21693 21815 21890 22089 21890 22213 21583 21941 21271 21808 21111 21640 21025 21870 21397 22256 21532 22290 21818 21968 21440 21677 21067 21935 21380 21733 21548 21943 21804 22151 21718 21955 21262 21560 21140 21473 21507 21901 21391 22192 21695 22039 21575 21713 21221 21607 21190 21957 21478 21689 21829 21899 21998 22152 21731 21792 20731 21143 21252 22628 22032 22746 21938 21477 20868 21192 20544 21534 21821 22144 22755 22504 21843 21375 20809 20672 21076 21315 21108 22612 21963 22984 22246 21615 21097 20962 20533 21424 21604 21504 22057 21788 22172 21857 21738 21600 21411 21289 21629 21507 21589 21802 21845 21802 21785 21376 21543 21407 21472 21205 21799 21520 22016 21665 22258 21801 21769 21469 21594 21382 21656 21672 14192 17990 19324 19558 20046 19649 20061 19446 19911 19793 26416 23514 23474 22370 22135 12342 18267 19044 20689 20329 20748 20907 21105 20799 21040 26227 23732 22451 22661 21879 22471 18272 20365 20308 20704 20501 21348 20769 21163 21350 27505 23623 22665 21738 21927 21618 19057 20126 21640 21067 21634 20803 21429 21080 21433 21518 23811 22481 22373 21524 21684 19333 20929 20985 22016 21536 21853 21220 21517 21149 21611 22941 22501 22080 22063 21256 21792 21457 22195 21665 22186 21557 21460 21063 21297 21856 21899 22519 22311 21096 20874 21157 22350 22309 22355 21120 21124 20916 21359 22767 22551 21924 21528 20881 20785 21193 22952 22423 21816 20951 21198 21195 21352 22770 22587 21707 21154 20948 21213 21172 22763 22333 21720 21252 21331 21519 21542 22064 21852 22145 21639 21437 21271 21610 21660 21751 21984 21932 21343 21434 21520 21783 21610 22112 21832 21719 21381 21545 21238 21593 21754 21768 22024 22007 21686 21481 21637 21665 21394 22168 21764 22029 21523 21442 21105 22087 21688 21875 21827 21888 21224 21521 21373 21776 21333 22132 21740 21921 21363 21621 21287 21781 21660 22023 21655 
35256 41792 37362 35149 32704 34816 36688 41626 37633 41294 40563 40584 41399 39296 37239 42112 38060 33040 36748 35915 33408 34247 34470 35921 35413 40264 38854 41710 40617 41124 41452 41312 36528 42567 37548 35511 35818 36074 33032 42155 35020 35460 39449 41223 41612 40639 39707 38880 40114 43145 34890 35399 32856 33079 33671 34422 38602 42067 42605 39872 37319 39719 39168 35241 41938 37965 42040 33427 35189 32836 39296 40160 41209 41228 36000 32732 33552 35927 41911 38866 36628 37978 36752 34280 37890 39107 35048 38983 40360 36583 34030 36872 39472 39759 38068 40384 38912 31684 33523 42406 34519 40995 39681 36611 34935 36615 39968 37545 40983 38528 40749 33634 41297 40473 40167 37792 41415 34912 36339 35271 35459 33731 38397 37290 36035 36868 34374 35962 41366 40712 39728 37984 39994 42370 40408 40135 40193 40857 33769 40663 35048 32976 32834 39786 35417 40096 40768 35156 34983 42215 43104 36392 35152 33246 41312 42624 38091 42471 34900 39224 33009 42488 38016 34993 36902 37259 34929 39288 36521 40150 41423 39863 34352 36306 34846 37520 34681 35889 35896 35568 33908 34774 38392 41854 31778 31220 39482 37376 37047 31836 34872 39176 34432 44816 37812 41837 36997 42176 38760 35562 36268 38582 34508 37159 35473 37034 36405 34400 36195 34156 35045 42027 40540 40179 37088 39373 40408 39371 38640 40467 40985 35146 38824 41929 37828 40937 37440 35872 33208 33464 33324 38057 41216 34914 37221 42696 35290 41575 38953 42459 37327 42120 39936 40992 37433 39780 41858 40488 39421 40836 39663 36739 39352 43211 37782 42569 36840 36736 34107 34164 33393 37585 35453 35145 41990 39056 33536 36950 34247 33249 41302 42716 41305 37285 41958 31860 38144 38187 43412 40791 39146 39753 34711 42342 39368 36608 34583 43399 43009 36528 35392 37286 34347 41433 37296 33816 34600 36480 42252 35284 42068 40040 33824 38659 35864 33810 33472 42920 38743 34649 36440 34916 33702 35220 32835 40899 43279 39701 32936 36463 41865 34789 37012 35045 36980 35143 34149 35495 40768 41405 40621 40152 42010 37321 41456 35111 37479 34966 35196 35953 42646 35876 38488 41520 40992 36788 35688 35620 35792 35897 34225 36267 40371 41066 41925 38762 33031 35128 33379 34602 34692 36480 39301 41925 41352 40674 43178 36019 33262 42632 37356 36668 35366 40755 41187 32613 33119 40080 32768 36081 40118 39345 40130 36049 34149 35867 37968 42021 37400 34779 36144 36856 33677 36053 40144 33590 33365 40360 38048 34391 42743 35704 36748 39192 40022 41090 41034 38328 41952 37995 37236 42944 38615 38797 34801 35995 37984 40916 37750 34128 41768 35380 42305 35808 34151 40327 39560 41031 37504 34799 33076 35236 34004 35687 35831 40448 39724 41844 34336 37340 35749 35080 38796 40451 39528 42979 34530 42656 35457 41313 38104 39259 41546 41266 35994 37568 35974 35602 38356 41089 37856 40823 38576 41733 34473 35235 35424 42632 41877 42679 39214 34560 33509 35844 39360 40615 41137 42010 35760 42443 34604 40629 38861 39584 38807 42353 34240 37801 37516 33287 39332 39613 40192 34784 34375 35122 35747 34011 38101 40363 39282 42403 42688 36558 34167 39824 39086 40181 41609 38925 38064 42023 41006 42288 39050 35460 41224 40720 37461 35696 41057 33232 37184 39469 41315 38545 37805 41692 33657 39296 42154 35521 42528 37368 40070 36257 33220 41913 37613 35098 41124 38977 37188 34576 38616 34728 35426 38357 34732 36264 36999 35315 35603 39611 32720 37581 36980 35476 34739 38941 41001 36761 37600 36564 34587 40041 40896 31827 33812 40878 33488 37233 41687 40985 34544 37716 37664 39012 40887 43507 36011 36039 34904 36688 40544 38850 40384 37985 33969 35531 39344 39156 34016 33834 35440 36225 39570 39528 41271 35674 33704 35748 39341 39872 41008 35864 34409 36785 39556 40294 42577 34624 36440 38039 39907 40214 33202 33216 36132 40071 40962 39829 36889 34468 35568 34005 39605 38742 42000 42616 37092 38612 40573 36896 35373 33920 33432 37828 39399 35590 35424 41656 35658 37284 39346 35268 41217 35316 37309 41111 41424 43248 37330 38214 35792 40065 37459 36568 33253 37442 38816 34500 34433 38976 34444 40313 35936 35112 33315 41456 37867 33024 41968 36228 38061 40453 37529 38091 40484 41280 41357 42734 32889 36117 37015 40145 35328 34709 37348 39880 40161 34740 36408 41837 41637 41803 34522 35633 37712 41760 34791 35925 40781 41154 36262 36846 35933 38345 38791 42688 36252 40691 39991 36096 37582 39387 39184 42948 36528 40932 40686 33113 34605 41960 41497 40775 34560 39509 38584 37272 34576 39069 37965 34373 36924 40272 38828 36173 37057 41193 41158 42350 34136 38836 39683 39796 34897 35668 40787 36200 38464 37712 33394 43240 41325 34696 41414 37209 31436 39919 38661 39943 36352 39296 38319 38241 36864 35323 37922 35716 35315 34773 42354 33754 40056 37156 40807 38027 36579 36981 42869 34767 38763 33393 41072 33745 36853 37504 42604 34093 36712 36054 41761 33056 33675 39739 42640 34848 41186 38472 37317 35431 39469 35034 35881 38584 41964 35176 36923 38032 35411 35748 40074 39662 33443 37283 42038 35448 35829 37724 32840 35915 42679 40006 42496 36193 39719 34330 34379 39607 33207 35768 32896 42040 41896 35008 39417 38690 36400 35864 39340 34776 35064 41283 35712 34220 33555 39287 33201 35507 40940 38286 35604 40416 35942 42728 43008 39376 34363 37218 40408 38724 35039 39505 41133 34659 39494 39148 38729 36404 39728 41595 40459 34212 34662 34455 36768 40001 39872 42825 39796 41344 34251 35422 43040 38519 39245 36825 36224 35200 33460 38344 43107 40537 36968 40895 41360 38439 33289 32730 42114 42701 36672 36996 38328 42968 43104 41306 37081 38857 37456 37009 33261 41513 33152 35735 40353 34612 37872 42826 43008 33280 36995 37136 36868 34665 37080 39392 35319 35821 41397 42661 35633 42429 43232 40692 38406 37521 38632 35366 36125 40230 34582 41536 38684 35741 41799 33401 39020 41939 32512 34455 34288 32922 36471 34311 34273 40457 36756 40311 40779 36715 42523 35008 41176 42552 36002 41603 35745 41590 40229 37008 37557 34560 39529 39668 34166 34272 40856 34071 39728 41892 33984 39474 38224 37017 38761 37396 35752 33717 37029 39753 33899 41344 38264 35440 42637 43015 38374 39728 37710 37414 39492 33776 39624 43681 41656 38485 38721 38027 37793 42708 39021 42176 38231 40286 35018 35264 34134 38281 34732 35341 41412 34597 41652 40092 33527 42304 34797 38316 38484 36769 36992 34550 34837 34089 41546 34152 41344 41922 35752 37659 36452 40436 35800 40768 32903 35937 33825 42652 42018 42166 39712 34688 33107 39327 38173 39168 37866 37446 35777 35142 41461 36369 39424 34224 40504 36322 42085 37464 35890 41552 34584 40345 42673 37552 39732 35273 41564 34452 39424 35840 41273 39680 36653 39868 36393 37080 43137 36263 39731 34804 38744 34315 41617 38984 36052 42520 34509 42215 42117 40462 41169 37501 41812 43141 41418 34085 39514 37100 34928 38733 37315 38955 37840 38220 35729 35685 34816 35365 40437 33949 36445 39516 38043 34688 36673 35793 42104 37837 36283 36825 41391 38400 39971 35688 32426 37510 39117 34432 37505 37008 36166 37877 39207 38364 38229 43248 43403 43575 33991 35403 39226 32933 36261 42441 34406 41472 41649 42840 42752 42152 34855 32800 36852 36725 38171 37040 38328 37657 38623 37726 35736 37206 35218 36212 35476 41737 36681 39234 33108 40420 34242 42276 34496 42560 34662 34240 37895 34996 40717 36039 41014 35243 41750 33664 40128 41645 38649 36076 34464 40584 33659 41003 33737 39652 35442 40359 38443 40456 36565 42232 38978 32691 39221 37355 39782 37290 37080 34788 36807 34505 37191 34667 36010 42160 35915 40268 36569 40100 36096 40057 34469 39560 33833 40439 34608 33792 34694 41381 38103 34982 38644 34960 40216 36855 41195 37520 41139 36297 35200 35468 36984 35284 36080 39429 38444 36104 35637 32973 42786 39825 43381 39956 41248 40727 37363 41344 33699 40485 41561 40384 41266 39256 37644 39443 37648 39286 42628 42293 35077 33937 33098 35213 42535 38132 42185 33251 42356 41580 42602 34306 33160 33932 34327 34057 33291 33785 42323 35750 41758 36165 42899 38448 42635 39943 41216 37126 39546 35383 41572 35620 42273 35999 41816 35968 42071 36225 33884 36005 42061 35907 33537 35510 33449 36256 35234 35991 35157 36248 34660 35732 33368 35633 33108 36361 33783 36256 42660 36880 41381 41131 34242 35543 33357 35189 33904 35159 35222 36968 34200 37132 33372 35676 42776 36464 42752 35852 41323 36052 31077 30480 35185 31167 39859 35025 31177 32298 33890 41740 43596 40397 40960 42793 33110 38597 42245 38893 40912 36144 39377 37029 37688 32746 36576 40689 33684 32395 32173 37154 40691 40247 34668 41024 32768 40172 44656 43661 36027 37219 38362 35250 36417 42887 36245 41714 37932 41803 38889 33880 40027 41200 40516 37616 40351 39062 35020 33281 37857 35523 38276 35540 41440 35249 41176 42088 43335 37188 40171 36674 41003 34542 39201 33929 39316 34352 39832 35649 39745 36197 41344 42504 43060 39831 37296 40576 37469 40540 36064 43144 37659 40620 34172 35562 42279 36369 41838 35725 41299 35365 41152 36103 40715 35561 39990 34657 38754 40455 39095 38536 42547 40168 33559 39688 34613 39411 35545 37591 38054 41696 34272 39433 33386 39767 34587 39536 42461 38797 34184 39360 35307 40609 34059 39852 34711 40191 36294 39065 35391 39224 34892 39611 38118 40496 35789 41456 35392 39840 36492 41332 34713 39828 37047 40431 36563 39533 34469 39072 34672 39538 33593 36160 41740 34517 41264 34488 41572 33718 40159 34701 36493 40352 42256 42279 41530 34345 40883 42823 41836 35990 41335 37796 42634 39842 33253 40835 43958 34669 43328 36964 33334 36285 37994 39540 36772 40009 35884 39147 36515 35712 35080 35265 36013 33961 35270 35288 35381 34967 36023 35790 33127 32986 41271 33400 40371 32770 40296 34706 40140 37731 43017 40512 41747 35544 42248 35287 34384 34929 35650 35905 36160 36353 36882 38389 36646 39770 36240 40397 36271 39835 35598 38676 33826 38853 39064 35029 40332 34930 39565 34820 40348 35565 40322 33815 40505 34080 41690 34347 35354 35813 41901 37426 41408 38484 40827 40100 41186 41368 33940 41833 35704 41139 35120 37568 42472 37387 41923 34056 40049 33744 39137 35040 39874 35178 39926 35520 40933 36123 41351 36297 36495 37808 37650 39339 37010 39975 35874 38650 35094 38656 41920 35723 34709 36868 37616 36256 39392 42186 39226 37880 39244 42918 42459 35120 39258 38168 43200 35687 41363 42904 37896 38160 33317 39767 34640 41257 37859 42009 34147 41036 41984 33993 40384 36016 40018 36235 36613 35074 34094 33412 42554 41162 41222 41377 33432 40724 35745 41899 34275 36929 36965 38639 38790 39064 39512 38080 38490 34567 35737 41072 35125 39954 34182 41474 33932 33252 35574 41254 37505 41783 40805 33190 40695 35756 38872 33300 35717 40425 33657 38623 34380 40369 35101 35168 36462 37073 39441 37210 40802 34199 37741 40645 36322 39072 34424 37802 37232 41859 41333 33431 41136 36664 37953 42164 35271 38480 38023 41600 35840 33371 37814 36341 40101 35556 37924 40540 33643 38985 42725 33095 37285 41991 40581 35544 38828 33906 35113 40103 34408 39685 38112 42848 35365 36529 37408 38644 40033 35716 35876 34983 39264 40302 34832 38452 36152 37664 42776 36393 39723 32602 33028 36472 39743 36329 43631 37027 41936 35877 33909 38357 41104 39081 34530 38116 38628 41237 34636 38720 37360 32568 41717 34260 32440 38835 36196 40272 36995 35673 33794 41841 40976 34752 32700 33703 36118 36761 36240 36032 41322 33632 41984 42777 40332 36493 32788 38124 34727 41097 36453 35825 42709 34251 41507 34768 34683 37158 36448 40409 32983 38075 33792 38312 41728 37044 35441 44088 44636 44117 42658 40338 27652 39015 37467 34195 41033 35088 36741 38859 35833 37912 42619 36781 43157 35320 37268 43384 39640 41664 41041 34568 31955 41047 35248 39532 41571 46031 35866 35015 35588 37696 34208 37420 39147 34439 38444 34286 35440 42162 38784 42391 33384 37179 43401 42732 33269 34741 40220 37035 37712 38354 33118 36817 40064 33229 39283 34407 38185 43812 39409 39424 40368 36103 42399 40823 34865 40344 33689 42272 38744 40887 36951 37428 44059 42119 38960 36395 39425 42363 41953 42406 39013 39026 36872 41763 36807 33817 37380 33021 36141 35253 39788 38343 43008 36608 37325 40032 40128 41553 36539 34306 35220 39186 37238 40240 39696 36565 42085 35572 40116 41379 33424 33109 38755 36977 39864 34641 42312 40865 34363 34585 35855 38114 37808 41603 42538 33095 35957 34140 39363 36636 35508 41562 33588 40231 34140 35771 35696 38476 38824 35104 42707 34636 34565 41568 40370 35851 38736 33124 42016 39069 39505 35108 37095 36553 36973 40129 33088 41656 35959 41216 40053 35892 37457 41617 34583 40694 36170 34681 38608 34793 
23126 23616 22893 23410 23416 23220 23409 23158 23446 23268 22920 23424 23082 23756 22951 23906 22697 23704 22759 23798 23013 23372 23181 23296 23284 23320 23511 23151 23021 23418 23077 23602 22865 23866 22793 23515 22725 23682 23204 23376 23285 23184 23228 23111 23264 23469 22913 23750 22832 23634 22838 23762 23081 23215 23404 23092 23101 23253 23163 23566 22432 23781 22750 23512 22764 23586 23191 23723 23472 23101 23143 23424 23024 23718 22953 23897 22963 23184 23340 22793 23415 22675 23515 23530 22466 24297 22246 23716 22537 23837 23590 23205 24036 22406 23847 22644 23497 23873 22752 24503 22232 23282 22677 23645 23561 22192 24348 22256 23501 22726 23180 24000 23055 24471 22230 23309 22729 23058 23981 22802 24399 22584 23094 23380 22983 23146 23051 23284 23589 22872 23655 22809 23245 22889 23303 23355 23104 23623 23128 23001 23445 22942 23533 22995 23673 22813 23319 22881 23631 24275 22812 23753 22327 24215 22987 23902 22750 23488 22816 23557 23113 23050 22872 22656 23890 22566 23168 22391 24093 22457 23200 22904 23447 23262 23324 23099 23459 23162 23367 23155 23364 23113 23085 8567 15189 16475 16430 17638 16899 17739 17169 18103 17508 29580 25779 25425 24305 24616 24117 24018 23657 23808 23951 23846 23772 23524 23632 23155 23492 23607 23508 23616 23255 23826 23025 23575 22964 23936 22951 23829 22875 23881 23118 23794 23094 23671 22871 23553 23274 23211 23143 23148 23455 22695 23293 23440 23058 23433 23120 23618 23009 23407 23233 23461 22787 23450 22848 23741 22868 23676 22790 23812 23142 23704 23100 23502 22968 23399 23348 23225 22995 23072 23515 23079 23348 22784 23878 23176 23752 22822 23626 22832 23220 24100 22457 23705 22093 24345 22810 24000 22722 23539 22726 23212 23751 22669 23724 22315 23979 22831 22464 24361 22720 23349 23109 23275 23090 23111 23426 22903 23228 22898 23617 22360 23473 23143 23040 23059 23008 23360 23363 23306 23205 23077 23140 22725 23655 22988 23623 23024 23272 22850 23111 23376 23140 23290 23314 22887 23259 22745 23661 22943 23604 22931 23303 22920 23064 23317 23235 23128 23368 22707 23343 22672 23591 22788 23249 23232 23314 23146 23264 22981 23228 22627 23704 22250 23426 23251 23217 23055 23348 22791 23321 22702 23712 23017 23466 23055 23129 23035 22951 23392 23205 22761 23703 15687 18080 18244 18560 18733 18795 19205 19169 19081 19869 25441 25585 23817 24466 23898 23087 24173 23383 22888 24855 23299 24133 23809 22883 23879 22506 24007 23302 22287 24507 22914 23112 24405 22883 24026 23117 22810 23122 23085 23626 23351 23171 23619 22954 23457 23310 23138 23413 23237 23076 23403 22798 23699 22860 23468 23205 23209 23297 23387 22924 23543 22912 23354 22937 23099 23340 23248 22848 23676 23029 23541 23104 23090 23220 23476 22720 23525 22642 23494 22866 23133 23361 23376 23098 23636 22786 23588 22844 23275 22976 23050 23141 23229 22723 23794 22854 23279 23366 23332 22932 23698 22862 23651 22993 23107 23129 23541 22695 23612 22833 23362 22897 22997 23348 23228 22903 23599 22937 23457 23213 23125 23255 23369 22712 23569 23040 23008 23171 22936 22987 23156 22272 24241 22619 23360 23915 22716 23744 23229 22420 24047 22595 23195 23108 22275 23915 22760 22374 24359 22204 23238 24147 22833 23671 23816 22532 23392 23415 22771 23525 22925 23020 23158 22949 22916 23118 22750 23453 22872 22904 23297 23113 22807 23665 22891 23029 23432 23109 22805 23585 22829 23124 23335 23185 22857 23629 22732 23048 23288 23128 22720 15171 18224 19783 19891 20209 20071 20787 19913 20722 20452 26342 24654 24583 23393 24161 23604 23584 23460 23845 22877 23868 23183 23296 23312 23752 23026 23631 23326 23293 23287 23602 22805 23713 23208 23169 23239 23705 22736 23693 23143 23191 23168 23605 22969 23441 23347 23262 23117 23653 22858 23373 23280 22644 22872 23740 22915 23121 23580 23078 22583 24083 22712 22685 24183 22880 22234 24221 22702 22503 23287 23335 22141 23485 23223 22442 23079 23283 22122 23245 23500 22684 22407 23913 23734 22606 23695 23501 23015 23124 23583 23118 23081 23425 23066 22808 23514 23004 22871 22897 23456 22990 23009 23201 23504 22775 23450 23343 23267 22986 23734 22772 23034 23266 23194 22641 23180 23097 23193 22661 23568 23064 23111 23045 23714 23344 23184 23239 23293 22596 23560 22838 23197 22679 23510 23141 23400 22734 23697 22887 23128 22789 23469 22886 23012 23029 23660 23033 23182 23111 23467 22813 23048 23068 23627 22697 23308 23257 23296 22679 23186 23141 23772 22811 23004 22944 23442 22953 23118 23079 23741 22790 23080 23241 23239 22838 22977 23208 23692 22869 22752 23032 23512 22811 22570 23725 24183 22629 22426 23584 23513 22876 22625 20100 21945 20575 20172 20817 22082 21760 21020 21005 28692 24000 22929 23310 24137 24204 22579 23058 23417 23462 23091 23184 23079 23652 22982 22959 22919 23495 23257 23289 22932 23610 23027 23203 22640 23445 23444 23168 22725 23041 23165 23649 22882 23084 22913 23552 23152 23238 22752 23574 22894 23268 22857 23148 23277 23415 22809 23232 22793 23711 22936 23264 22693 23345 23286 23225 22772 23064 23008 23696 22941 23325 22583 23451 23219 23201 22677 23076 23207 23611 23144 23035 22649 23571 23175 23464 22664 23439 23028 23374 22769 23350 23319 23261 23044 23353 22681 23511 23122 23439 22767 23165 23281 23357 23068 23145 22733 23048 23229 23559 22797 22911 22470 23491 23792 23138 22571 22548 23262 24401 23175 23096 22681 22640 23517 23828 23644 23375 21960 22834 23800 24327 22808 22632 22413 23256 24060 23312 23056 22919 22139 22562 23234 23447 23305 23098 23193 22720 23184 23304 23513 22976 23073 23001 22970 23117 23439 23406 23138 22746 22997 22887 23520 23119 23422 22877 23092 22805 23264 23206 23552 23248 23093 22642 23091 23126 23630 23072 23659 22832 23180 22691 23081 22945 23645 23203 23304 22976 23353 22568 23105 22717 20640 21790 22513 21673 22235 21971 22141 21656 22512 22218 24344 23588 23360 22903 23459 22767 23058 23076 23718 23008 23564 22731 23096 22721 23146 23062 23577 23255 23197 22741 23165 22736 23246 23200 23657 22860 23337 22828 22971 22681 23198 23239 23495 23301 23233 23184 23637 22553 22770 22895 23697 23698 24193 22699 22614 22556 22291 22432 23767 24093 23501 23453 22585 21997 22459 22888 23560 23836 24337 22948 23331 22631 22274 22639 22176 22558 23371 23590 23034 23405 22871 22951 22946 22933 22961 23041 23068 23401 23447 23357 23369 23155 23028 23065 22832 23235 22604 22963 22960 23351 23175 23633 23189 23684 22977 23488 22791 23132 23005 22989 22787 23053 22755 23434 23181 23603 23287 23403 23212 23307 23015 23153 22780 23362 22593 22948 22784 23365 23034 23609 23114 23700 22921 23620 22737 23367 22936 22988 22608 23191 22906 23569 23303 23622 23229 23430 23043 23148 22748 23296 22614 23126 22592 22981 22861 23410 23158 23652 23121 23606 22865 23475 22878 23248 23035 23004 22769 22925 22624 22988 22709 23371 23293 23687 23953 23580 23729 22912 22752 23018 21991 22851 21985 22501 22549 22551 22790 23065 23552 23808 23802 24272 23693 24345 23475 24090 22822 23620 22695 22724 22801 22468 23109 22723 22965 22832 23004 23126 23374 23256 23493 23181 23608 23111 23490 22863 23189 22867 23233 22897 23055 22717 22931 22894 22988 22725 23059 22773 23364 23146 23552 23305 23425 23296 23268 23264 23312 23184 23183 23047 23163 22868 23317 22745 23161 22615 23081 22592 23117 22796 23335 23040 23467 23161 23670 23101 23766 22993 23718 22855 23722 22894 23561 22814 23504 22804 23210 22816 23018 22798 23063 22634 23063 22664 23182 22664 23271 22732 23469 23181 23470 23223 23594 23290 23472 23296 23370 23223 23218 23306 23297 23141 23166 23034 23177 22979 23183 22877 23121 22790 23124 22486 22920 22249 22698 22017 22864 21991 22752 22057 22606 22260 22540 22180 22492 22277 22564 22644 22554 22136 22476 22343 22528 22393 22600 22492 22503 22553 22713 22712 22828 22984 22839 23239 22890 23352 22967 23317 23152 23244 23121 23321 23131 23169 22796 23113 22858 23189 22839 23300 22960 23245 22909 23140 22809 23352 22935 23392 23044 23394 22778 23355 22952 23397 22871 23376 22881 23380 22677 23200 22691 23208 22697 23149 22629 23221 22697 23016 22635 23063 22672 23052 22691 23089 22616 23211 22675 23203 22657 23280 22780 23385 22785 23089 22624 23081 22727 23161 22598 23082 22560 23100 22585 23182 22656 23161 22650 23235 22637 23197 11691 15203 15721 16626 16423 17245 17020 17581 17291 17825 27959 26471 25212 25191 24633 24752 24106 24397 24022 24215 23799 24080 23735 24151 23832 24332 24057 16679 18377 18850 18790 19449 19293 19685 19507 20173 19889 27138 25858 25456 24842 24944 24537 24537 24092 24336 23854 24023 23810 23896 23413 23880 23351 23702 17833 19591 19881 19991 20170 20109 20313 20480 20439 28304 25203 24308 24370 23812 23898 23455 23860 23400 23752 23258 23752 23105 23693 23092 23398 23265 23595 20049 20929 20775 21240 20829 21377 21008 21594 20968 25921 23897 23994 23321 23872 23251 24148 23196 23248 23243 23642 23296 23565 23356 23498 23331 23506 20693 22103 22242 22465 22383 22535 22451 22570 22378 22631 24237 23933 23581 23876 23597 23869 23618 23821 23543 23778 23481 23847 23596 23718 23536 23747 23492 23748 23424 23773 23423 23745 23367 23672 23303 23680 23141 23632 23152 23701 23301 23633 23224 23578 23336 23612 23308 23653 23303 23686 23418 23719 23441 23713 23729 23882 23704 23968 23769 24051 23848 24106 23994 23426 22907 23165 22829 23076 22708 23175 22781 22906 22536 22700 22569 22641 22507 22523 22652 22385 22155 22947 23050 22632 23105 22608 23076 23018 23242 23107 23273 23148 23221 23450 23251 23306 23209 23441 23224 23412 23219 23313 23255 23424 23429 23473 23528 23520 23636 23399 23517 23332 23554 23076 23424 23075 23480 22951 23328 22751 23178 22743 23113 22836 23127 22948 23319 22639 23301 22905 23462 22871 23527 22899 23619 22848 23584 22922 23774 23181 23836 23111 23856 23120 23815 23139 23812 23252 23735 23274 23644 23136 23456 23070 23271 22995 23149 22824 23164 22666 23428 22702 23330 22772 23376 22976 23281 23182 23366 23305 23499 23413 23591 23429 23623 23367 23605 23328 23584 23196 23433 22914 23341 22689 23072 22932 23156 22884 23361 22831 23449 22872 23649 23019 24053 23233 24271 23778 23908 23728 23215 23005 22826 22454 22610 22157 22695 22039 23111 22624 22898 23076 22979 24183 23744 24285 24047 23751 23661 23125 23443 22784 22817 22582 22615 23198 22992 23420 23009 23178 23308 23160 23425 23412 23511 23521 23533 23428 23370 23503 23303 23392 22792 22949 22765 22928 22901 23232 22897 23420 22872 23556 22969 23696 23114 23756 23191 23612 23124 23400 22979 23074 22799 23098 22637 23450 22786 23302 23116 23419 23250 23579 23355 23668 23237 23372 22753 23076 22766 23091 22990 23263 22813 23592 22919 23742 23085 23763 23148 23360 22848 23111 22656 23232 22857 23269 23187 23467 23351 23691 22925 23321 22709 23175 22942 23127 22848 23440 22970 23761 23233 23722 23236 23298 22824 23168 22804 23196 23153 23243 23484 23562 23296 23521 23000 23304 22777 22984 22900 23268 22889 23777 23223 23984 23160 22602 22141 22913 23074 23077 24041 23922 23891 23732 22752 22498 22841 22963 22717 24061 23560 24375 23794 23569 22902 22606 22091 22970 22780 22868 24060 23727 24180 23676 22825 23047 22987 22654 23240 22963 23121 23312 23345 23505 23447 23143 23174 22866 22973 23034 23440 23080 23640 23268 23616 23227 23268 22789 22977 22749 23151 22976 23182 23258 23504 23392 23324 22735 23022 13858 15644 16040 16944 16640 17533 17213 17976 17516 31221 26572 25809 24804 24981 24749 16776 18187 18937 18624 19109 18707 19240 19008 19696 19241 27560 25628 25143 24284 24848 16390 19704 19968 20505 20640 20946 20337 20744 20309 20654 26244 25660 24801 25152 24309 24440 20308 21271 20936 21591 21633 22032 21498 21689 21150 26225 24322 24606 23851 24579 24012 22306 22133 22318 21950 22470 22556 22775 22597 22689 22003 23899 23299 23995 23526 24165 23428 23539 23079 23523 23628 23767 23994 24085 23012 23008 23217 23368 23239 24663 24120 23363 22379 23129 23910 24152 24217 23486 22717 22749 22908 24053 23722 24505 23692 22822 22642 22992 24198 24184 23714 23300 22602 22720 22925 24265 23848 24055 23152 22725 22359 23049 24349 23603 23698 23341 23172 22852 22720 23307 23473 23688 23676 23255 23094 23283 23365 23125 23695 23424 23232 22997 23360 23094 23337 23453 23568 23517 23609 22980 23120 23033 23437 23142 23736 23352 23468 23121 23238 22852 23319 23246 23527 23500 23731 22962 23179 22866 23505 22976 23831 23334 23594 22896 23183 22866 23392 23457 23684 23297 23469 22743 23196 22810 23777 
23477 23322 22144 21840 22925 21480 23752 20929 22529 21829 22452 22763 21767 23857 20705 22871 20966 23848 20963 22059 22253 21885 22988 21617 23691 21028 22261 21131 22912 22457 22219 22618 21895 21993 22215 22339 22561 21824 22848 21728 22530 21823 22806 21840 22093 22368 22124 22378 22028 22629 22167 21976 22742 21600 22778 21616 22787 22153 22336 22552 22088 22429 22128 22441 22347 22316 22935 21511 22629 21603 22609 22194 22421 22536 22179 21785 22664 21725 22873 21533 22844 21824 21769 22375 22211 21833 22340 22041 22685 21503 23095 21380 22865 21480 22927 21936 22400 22528 22007 21895 22383 22020 22679 21608 23077 21536 22615 21429 22851 21885 22400 22388 22131 21768 22555 21888 22821 21568 23185 21527 22603 21838 22319 22191 22293 22274 22444 21792 23170 21397 22753 21490 22822 22071 22729 22320 22209 21738 22708 21568 22776 21418 22923 21487 22417 21539 22611 21840 22288 22297 22135 22195 22267 22375 22272 21775 22545 21914 22696 21593 22928 21623 22392 22336 22087 22197 22016 22208 22617 21719 23204 21532 22365 21943 21943 22354 21378 23304 22069 21352 23412 20610 22453 21577 22013 22823 11465 12388 12623 13825 13638 14388 14299 30269 28140 28021 26224 27096 25131 25779 24321 25395 23987 23942 24714 22887 23539 22602 24617 22445 23552 21726 24417 22577 23559 22404 23341 22465 22999 23795 21669 22669 21395 24215 21522 23311 21121 23852 21928 23212 21920 22002 22456 22008 23100 21867 22715 21935 23065 21833 22677 21917 23063 21962 22775 21987 22841 22061 22534 22370 22388 21935 22363 22588 22311 22208 22131 22567 22373 22313 22259 22317 22422 22170 22709 21937 22541 21708 23041 21560 22600 21442 23120 21541 22815 21776 22765 21817 22413 22227 22135 22049 22139 22435 22483 22107 22743 21799 22520 21485 23005 22331 22831 22135 22297 21911 22167 22384 22350 22169 22335 22142 22541 21529 23096 21564 22896 21675 22532 21741 22341 22363 22093 22137 22167 22215 22420 21791 22922 21575 22711 21552 22880 21774 22313 22834 21446 22670 21542 22932 21529 20998 23896 21072 23242 20947 22903 21600 21532 23586 21336 22778 21977 21655 22764 20699 23345 20903 21572 23334 21229 22821 21397 22529 21906 21977 22560 22229 22266 22602 21626 22592 21867 22584 21784 22069 22508 22115 22333 22359 21931 22344 21597 22562 21863 10944 12714 13672 14389 15436 15305 16238 15559 17579 28567 29088 27287 26566 25578 25428 24269 24832 23277 24759 23270 23847 23596 23266 23159 23415 22584 23429 22191 23452 22291 22893 22732 23104 22407 23244 21943 23111 21861 23108 22117 22460 22533 22853 22034 23376 21800 22965 22359 22477 22345 22594 22088 22644 21673 23254 21984 22798 22479 22153 22343 22784 21686 22721 21770 22488 22016 22137 22628 22395 21464 23814 21376 22765 23586 21717 22688 22567 21135 22956 21148 22677 21944 21148 23715 21970 21936 23609 21105 23193 21769 21888 22377 20982 22386 22193 20976 22759 22112 21717 23073 22251 22308 22644 22036 22389 22704 21799 22625 22428 21898 22471 22211 22172 22528 21571 23035 21933 22197 22432 22263 22151 22923 21477 22581 22125 22145 22205 22580 21576 22746 21575 22742 21819 22327 22400 22617 21789 23100 21423 22819 22076 22066 21933 22217 21941 22470 21273 23125 21686 22145 22250 22619 21952 22952 21510 22818 22359 22291 21927 22961 21447 22989 21817 22255 22104 22324 21953 22551 21581 22557 21934 22027 22167 22441 21331 22992 21836 22039 22359 22439 21445 22806 21801 22000 22560 22487 21475 22672 21824 21568 22503 13100 13289 17236 15765 16318 18937 17525 17357 19992 17789 27281 27808 25188 24551 26299 23487 23719 24989 22680 23401 24659 22111 23247 24432 22304 22530 23160 22717 22372 23229 22168 22877 22872 22416 22519 23174 22147 22574 22731 22414 22262 23047 22105 22448 22715 21937 21978 23040 21452 22339 22584 22446 21591 23020 21782 22083 22445 22485 21515 23009 21824 22177 22359 22492 21417 23033 21762 22208 22321 22757 21715 22537 21997 22345 21712 22784 21607 22640 22016 22665 21463 22849 22264 22208 22057 23049 21721 22327 22453 22645 21376 23095 21744 22077 22168 22656 21512 22665 22164 22574 21543 22619 22485 22257 21914 23107 21824 22183 22417 22263 21555 22585 21953 22301 21589 22808 22184 21842 22307 23414 21369 21914 23569 21831 20692 23239 21940 21388 21546 22803 21596 21520 22028 23872 21451 20994 22488 22535 21233 21351 22869 22866 21292 22614 23644 21561 21465 22614 22611 22155 22103 22205 22824 21907 22029 22647 22201 21760 21969 22297 22807 21920 21792 21987 22713 22065 22228 22018 22915 21850 21979 22308 22583 21740 22233 22283 22885 21689 22079 22047 22560 21806 22120 22001 22928 21613 22283 22135 22682 21702 22087 22022 17512 17056 18144 18190 19655 19200 19704 19180 20869 25494 25246 23960 24679 23497 23624 22487 23619 22830 23166 22045 23127 22728 22940 21806 22634 22446 23234 21826 22424 22615 22660 21891 22259 22329 23223 21956 22110 21859 22905 22725 22439 21588 22403 22322 22983 21706 22114 22444 22522 21923 21627 21427 22949 22462 22317 21105 21882 23124 22579 21920 21205 21751 23801 22002 21609 20970 22466 23629 22562 22286 21420 21896 23632 21912 21437 21117 22977 23805 21789 21991 22030 22692 22391 22461 21731 22508 22203 22459 21815 22214 22643 22308 21851 22166 21788 22629 22055 22629 21734 22216 22528 22658 22066 22153 21752 22567 22247 22946 21793 22004 21612 22789 22409 22429 21617 22183 22032 22972 21620 22380 21312 22531 22214 22615 21873 22447 21440 22477 22091 22948 21689 22222 21359 22743 22211 22493 21639 22352 21499 22241 22153 22987 22000 22475 21733 22439 22033 23004 22376 22593 21342 22179 21513 22732 22043 23008 21702 22093 21547 22472 22439 22470 22040 22301 21408 22019 22075 23088 21985 22649 21729 22009 21581 22748 22714 22484 22665 22540 21221 21205 21277 22529 22814 23847 21799 22087 21437 20977 20937 21591 22436 20103 21092 19856 19479 19677 19190 20150 21174 22261 21495 25136 22832 22056 21866 22061 22673 22637 23285 22344 22933 22035 21969 22038 22436 22615 22737 22633 22279 21820 22024 21948 22902 22340 22952 21909 22249 21832 22034 21929 22871 22491 22676 22291 22430 21845 22409 21512 22277 22052 22986 21944 22947 22105 22114 21379 22656 21932 22896 22301 22359 21815 22401 21525 22343 22016 23111 21880 22919 21637 22293 21431 22245 21486 22425 21973 22913 22514 22391 21888 22304 21369 22263 21678 22902 22065 23106 22049 23062 21763 22784 21688 22317 21853 22066 21490 22350 21898 22688 22483 22708 22389 22444 22357 22294 21955 22208 21435 21852 21443 21715 21783 22343 22533 23641 22528 23777 21831 22874 21531 22161 21680 21143 21041 21152 21134 22455 22855 23069 23494 22651 23247 22073 22544 21575 20970 21374 20752 21564 22236 22434 22611 22679 22392 22346 22226 22018 22172 21655 21873 21721 22108 22144 22247 22171 22776 22253 22925 21933 22880 21845 22292 22007 22072 21607 22065 21589 22349 21957 22438 22145 22709 22490 22627 22225 22378 21825 22504 21374 22233 21413 22375 21672 22436 21981 23043 22088 23025 22121 23069 21836 23072 21728 22843 21573 22722 21364 22229 21632 22154 21496 22228 21450 22212 21781 22631 22201 22903 22376 22779 22214 22547 22030 22404 21742 21655 21627 22297 21495 22194 21408 22135 21464 22066 21755 22327 22140 22845 22122 22995 22214 22898 21824 22695 21824 22623 21778 22773 21911 21964 21629 21191 21125 20871 20998 20877 21038 21479 21555 22599 22804 23211 23540 22867 23574 22561 23542 22101 22832 21843 21952 21779 22272 21271 21420 21677 21857 21824 21911 21504 22263 21786 22400 22000 22279 22251 22563 22478 22501 22484 22385 22583 22505 22602 22497 22381 22369 22109 22289 22041 22334 21893 22625 21622 22432 21389 22273 21360 22205 21458 22116 21425 22135 21633 22277 21767 22216 21485 22251 21731 22552 21770 22644 21999 22631 22037 22760 22176 23081 21985 22749 22056 22916 21932 22920 22007 22901 21934 22855 22168 23015 22090 22971 22103 22956 22052 22979 22006 23155 22007 23049 21883 23023 22161 22973 22223 22976 22088 22901 22241 22929 22176 23019 22183 22924 22281 22926 22209 22963 22193 22944 22250 22933 22049 22993 22218 23008 22311 23208 22472 22865 22397 22961 22443 22703 22554 22704 21868 21975 21898 22101 21744 22385 22190 22584 22403 22699 22457 22832 22718 23084 22759 23521 22704 22140 22083 22314 22418 22296 22460 22244 22578 22013 22455 22179 22528 22288 22547 22514 22634 22160 8183 10243 12065 12869 14010 14387 15194 15291 16017 16023 30672 29353 28397 27264 26797 25892 25819 25146 25160 24530 24568 24129 24395 23795 24015 23521 23659 11956 14096 14862 16273 16348 17349 17317 17977 17932 30416 29193 28390 27042 26712 25810 25703 24888 24961 24303 24705 23865 24326 23696 24242 23538 23842 23312 15631 16373 17684 17657 18811 18461 19466 19136 19801 28114 27677 25718 25623 24320 24696 23717 24156 23140 23612 22979 23324 22770 23255 22421 22900 22365 16839 16985 18240 18322 19144 19007 19927 19489 20264 19571 26304 24500 24569 23184 23461 22491 22497 22392 21961 22336 21862 22096 21876 22272 21959 22053 22232 19457 20762 19814 21468 20306 21529 20520 21533 20716 22216 23700 24405 22863 24878 23321 24559 23074 23207 22951 23051 22829 22913 22820 22720 22739 22742 22592 22903 22616 22927 22845 22903 22852 22858 23028 22914 22980 22787 22904 22715 22875 22804 23047 22887 22967 22688 22946 22550 22840 22647 22836 22551 22784 22498 22802 22426 22805 22583 22832 22485 22802 22382 22744 22441 22979 22483 22938 22323 22853 22296 22893 22330 22913 22361 22960 22185 22916 22002 22863 21655 22113 21518 22288 21461 22148 21506 22203 21614 22211 21765 22221 21600 22528 21831 22391 21856 22624 21884 22518 21655 22288 21821 22388 21854 22776 21797 22876 21867 22909 22057 23013 22198 23169 22227 23075 22272 23051 22285 23015 22152 22551 22143 22108 21845 21973 21116 21378 20883 21371 20951 21725 20906 21831 20896 21956 21445 21949 21888 22025 22784 21912 22964 22110 23000 22112 23258 22656 23619 22785 23785 23061 23552 23186 23302 22931 22432 22403 22465 21995 22210 21838 21963 21738 21965 21642 22020 21863 21656 22067 22290 22233 22322 22272 22428 22468 22593 22389 22538 22427 22663 22354 22669 22443 22531 21667 22167 21387 22054 21559 22128 21774 22089 21779 22205 21154 22471 21799 23061 21984 23163 22083 23095 22035 22936 22007 22623 21942 22259 21415 22060 21423 22314 21527 22552 21952 22470 22131 22773 22383 22917 22473 22944 22289 22767 21943 22213 21485 22125 21613 22213 21703 22404 21600 22772 21665 22958 21776 23045 22017 22970 22100 23040 22249 22517 21742 22176 21504 22001 21570 22199 21617 22328 21792 22316 22192 22384 22378 22588 22679 22761 22325 22741 22062 22200 20907 21153 21095 21537 21124 22544 21671 23511 22170 23773 22722 22865 21961 21669 21296 21147 20615 21305 20965 21851 22221 21851 22830 22455 23652 23025 22493 21801 21083 21596 22027 21608 21595 22097 22348 22498 22640 22477 22556 21943 22013 21651 21812 21840 22289 21863 22686 22103 23056 22248 22712 21996 21919 21607 22351 21910 22323 22348 22647 22298 22677 22229 22595 21769 22049 21507 22118 21407 22570 21937 22957 22030 22343 21419 22285 21574 22487 22081 22709 22374 22865 21801 22076 21480 22227 21771 22754 21804 23154 22100 22997 22016 22333 21464 22240 21413 22401 22018 22580 22365 22913 22236 22512 21632 22037 21460 22366 21598 22812 21781 23095 22208 22887 21899 22489 21284 22361 21888 22343 22388 22648 22336 22861 22234 22452 21648 21993 21761 22157 21803 22816 22083 22816 22227 22440 8423 10790 11607 13342 13463 13847 15443 15725 16955 31736 29719 27837 26293 26601 25532 15671 15540 17800 17618 17472 16901 17071 16797 18182 30850 29828 29486 27885 26116 24855 15601 16599 18041 19282 18940 21152 20273 20529 18856 19193 28347 27183 27015 25754 26149 19267 19456 19456 19939 19817 20495 21168 21254 21159 21047 26325 25657 25188 24939 24232 24983 21256 22032 21416 21575 21154 21915 22071 22200 22055 25353 24052 23868 23503 24103 23239 24111 23051 23336 22513 23219 22834 23194 23132 23584 22456 22895 22081 22945 22263 23529 22610 22829 21723 22665 22472 23081 22666 22905 21787 22398 22016 22967 22223 23412 22089 22443 21753 22341 22534 23092 22592 23012 21602 22555 21844 23112 22205 23074 22168 22522 21553 22535 22500 22827 22470 22958 21732 22336 21672 22918 22000 23343 22253 22669 21642 22449 21722 22775 22637 22988 22174 22386 21792 22361 21882 22873 22144 23076 22219 22621 21779 22288 21678 22548 22611 22791 22265 22535 21664 22153 21907 22766 22085 23154 22387 22484 21414 22357 22124 22458 23233 23060 22275 21960 21052 21837 21613 23473 22741 23240 22037 21208 20760 21875 
