# Supplementary material for: An Active Feature Selection Strategy for DWT in Artificial Taste
Source: Hindawi journal article supplement (doi:10.1155/2018/9709505), 2018-01-01
Supplement: f1 [file 9709505.f1.zip › blackTea-med-1.txt]

43480 43489 42736 39866 51 6164 14890 18195 20363 20332 21195 21620 21948 21384 22371 22005 22286 21601 22388 22461 22544 22036 23032 22325 22508 22389 22890 22081 22725 22369 23060 22080 22956 22766 23063 22728 23445 22637 22683 22535 23276 22182 23112 22428 23108 22208 23096 22777 23008 22353 23546 22456 23068 22786 23304 22154 23303 22635 23144 22278 23267 22730 22931 22440 23511 22301 23211 22989 23194 22487 23588 22668 22986 22800 23450 22320 23162 22689 23141 22379 23172 22989 22929 22615 23797 22397 23248 23006 23402 22314 23533 22709 23124 22376 23381 22752 22923 22549 23340 22272 23205 23078 23213 22573 23397 22914 22916 22615 23255 22903 22992 22528 23558 22964 23013 22944 23401 22717 22984 22576 23637 22872 22883 22875 23310 22951 22961 22592 23657 22829 22801 23116 23399 22666 22583 22637 24096 23069 22358 23109 23464 23060 22284 22308 24084 23445 22578 22406 23117 23520 22437 22433 23768 23527 22806 21910 22809 23992 22919 22372 24167 23440 22309 22255 22996 23766 22379 22503 23895 23462 22738 22016 22753 23947 22841 22260 23597 23558 22664 22145 22764 23540 22666 23031 9344 15758 16777 17941 18460 19616 19288 19476 19655 20075 30670 26393 24990 25053 24128 23757 23530 23847 23317 23404 23175 23929 23256 23189 22918 23468 23384 23367 22784 23593 23145 23363 22721 23291 23309 23525 22542 23059 22748 23796 23030 23063 22987 23564 22774 23104 22791 23744 23067 23149 22679 23336 23175 23521 22443 23539 22889 23512 22593 23504 22949 23613 22871 23175 22854 23780 22890 23164 22457 23334 23188 23412 22433 23320 22709 23756 22816 23186 22727 23302 23136 23432 22356 23213 22705 23857 22842 23186 22510 23349 23040 23696 22580 23209 22677 23605 22970 23360 22496 23404 23064 23622 22794 23064 22990 23673 22847 23383 22400 23365 22965 23684 22896 23209 22356 23800 22968 23364 22361 23496 22860 23498 22980 23269 22493 23430 22887 23680 22842 22972 22575 23220 23229 23491 22756 22976 22684 23536 23029 23362 22588 23290 23114 23390 22978 22989 22656 23683 22991 23078 22625 23184 23312 23424 22405 23132 22849 23664 23041 22658 22504 23029 23901 23089 22226 22935 22980 23959 22528 22460 22731 23246 23688 22953 22176 22752 22694 24256 23072 22413 22797 23187 23938 23163 22213 22777 22844 24148 22771 22336 22533 23010 17985 19769 19542 19824 20448 22086 21687 21661 20725 32405 26180 24761 24832 23356 23082 23835 23703 24285 23379 22763 23177 23068 23787 23256 23440 22702 23232 23084 23372 23292 23175 22629 22976 22968 23736 23209 23321 22844 23005 22998 23141 23297 23440 23160 23142 22642 23249 22848 23760 23122 23474 22800 22997 22624 23232 23228 23473 23416 23488 22945 23216 22464 23160 22712 23493 22805 23667 22955 23511 22703 23048 22450 23385 22701 23150 23142 23540 22959 23276 22516 23008 22464 23163 22574 23640 22712 23840 22957 23724 22958 23596 22578 23192 22360 23296 22528 23308 22752 23318 23093 23473 23209 23557 23047 23552 22735 23328 22434 23076 22554 23172 22088 23584 22680 23754 22865 23740 22830 23573 22852 23124 22323 23173 22344 23293 22443 23218 22425 23324 22684 23302 22916 23223 22999 23266 23184 23303 23116 23593 22980 23531 22865 23488 22771 23460 22542 23268 22430 23309 22391 23169 22400 23082 22423 23121 22552 23016 22521 22968 22493 23040 22541 23287 22725 23168 22844 23162 22862 23195 22822 23244 23170 23276 22671 23160 22883 23160 22683 23136 22708 23279 22821 22976 22609 22984 22773 23093 22679 22969 22571 22906 16192 20142 20556 21412 21353 21740 21357 21608 21223 21553 25430 24029 23040 23115 22628 22919 22580 22642 22586 22737 22634 23063 22901 23253 23060 23164 23066 23443 23457 23724 23624 23760 23904 23573 23307 23527 23306 23488 23224 23648 23818 23725 23945 23739 24035 23670 23880 23737 24018 23644 24114 23657 24148 23467 24192 23450 24026 23282 24085 23771 24135 23556 23893 23146 23762 22990 23585 22887 23582 22840 23539 22786 23643 22839 23492 22912 23538 22903 23430 22944 23638 22890 23523 22801 23416 22844 23244 22795 23433 22836 23451 22758 23461 22794 23438 22813 23315 23177 23069 22792 23088 22563 22986 22553 23005 22711 22883 22565 22972 22472 22977 22558 23114 22515 23239 22686 23346 22671 23417 22964 23542 23084 23605 23107 23512 23085 23424 23241 23481 23108 23488 23065 23381 23173 23448 23154 23331 23059 23377 22979 23388 23043 23501 23058 23480 23027 23572 23061 23553 23046 23536 23063 23533 23019 23447 22679 23318 22638 23255 22522 23318 22521 23251 22606 23328 22629 23368 22603 23420 22760 23292 22390 23121 22403 23244 22467 23173 22432 23125 22349 23161 22678 23410 22650 23419 22703 23324 22700 23270 22615 23257 22584 21055 21296 22468 21770 22608 21992 22832 22107 22899 26769 24616 23553 23618 22755 23512 22952 23619 23008 23544 23142 23568 23178 23622 23192 23589 23136 23586 23247 23520 23238 23463 23172 23425 23168 23508 23196 23554 23125 23511 23268 23506 22971 23431 23033 23575 23192 23561 23229 23417 23154 23253 23108 23072 23055 23088 22742 22920 22565 23004 22391 22688 22156 22495 22105 22429 22416 22617 22582 22995 23104 22800 22754 23246 23488 24071 23174 24109 22722 23384 22476 22605 22414 22304 22533 22119 22108 22391 22330 23042 23189 23546 23829 23572 24022 23009 23642 22789 22578 22792 22258 22435 22043 22571 23062 23863 23552 24226 23243 24003 22621 22989 22191 23218 22730 22462 22925 22600 22896 22659 23201 23010 23584 22891 23552 22812 23216 22752 22961 22573 22984 22889 23371 23180 23320 23313 23168 23141 23014 22760 22935 22624 22852 22659 23024 22944 23150 22992 23648 23045 23653 22765 23545 22746 23265 22582 22891 22561 23021 22542 23264 23040 23444 23136 23464 23077 23335 23138 23175 22789 23200 22494 23079 22374 23027 22638 23126 22792 23517 22761 23510 22907 23762 22710 23637 22644 23457 22563 23303 22474 23105 22417 21249 21654 22531 21935 22820 22255 23242 22604 23319 22728 24161 23214 23540 23143 23344 22784 23306 22673 23216 22420 22978 22589 23539 22952 23739 22789 23737 22648 23710 22617 23529 22072 23248 22565 23116 22407 23364 22738 23547 23017 23457 23148 23404 22906 23447 22470 23168 22534 23105 22881 23460 22868 23729 22802 23693 22593 23597 22512 23590 22465 23054 22313 23065 22433 23239 22681 23552 23000 23490 23076 23388 23122 23303 23124 23172 22807 22569 22581 23092 22519 22916 22471 23125 22579 23176 22951 23522 22928 23622 22883 23575 22772 23156 22685 22893 22492 23064 22615 23278 22784 23444 23052 23397 23120 23369 23192 23168 22928 23265 22522 22829 22408 22671 22721 23259 23233 23504 23243 24184 23203 24182 22725 23440 22802 22509 22336 22125 22072 22357 22414 23192 23474 23624 23431 23637 23973 23224 23802 22807 23020 22469 22304 22522 21892 22344 22656 23333 23488 24199 23156 24119 22656 22658 22376 22080 22192 22960 23257 23616 24040 23261 23716 22859 23369 22930 22200 22247 22688 22632 23143 22967 23467 23298 23361 23209 23252 23078 23078 22843 23004 22618 22844 22609 22900 22919 23328 23237 23435 23044 23556 22925 23409 22775 23132 22860 22899 22546 22897 22519 23212 22921 23461 23063 23424 23172 23415 23114 23128 22877 22635 22670 23040 22484 22938 22605 23143 22862 23488 22979 23671 22932 23712 22855 23594 22590 23476 22587 23304 22176 23111 22432 23069 22509 23416 22917 23539 23095 23460 23066 23296 22585 23064 22345 23027 22717 23456 22817 23748 22570 23688 22508 23158 22428 23129 22676 23520 23063 23350 23040 23222 22517 23193 22360 22830 22572 23476 22890 23784 22616 23520 22528 23249 22471 23116 22197 23224 22523 23516 23024 23586 23011 23213 22772 22927 22365 22912 22391 23046 22845 23481 22944 23736 22610 23296 22672 23079 22401 23321 22833 23552 23028 23366 22993 23350 22904 23124 22468 23056 22295 22939 22506 23218 22813 23582 22884 23648 22752 23542 22637 23287 22625 22944 22464 23196 22878 23468 23156 23317 23232 23222 23030 23156 22676 22955 22494 22998 22876 23562 22888 23622 22680 23313 22686 22914 22343 23104 22903 23465 23313 23131 23078 22895 22241 22528 22757 23705 23367 24224 23200 23856 22630 22245 22151 22456 22709 23583 23902 23236 23552 22770 22871 22513 21848 22291 22314 23058 23388 24128 23037 23840 22501 22601 22295 22427 22171 22162 22511 23334 23604 23563 24035 23072 23127 22712 22023 22465 21938 22244 22792 23512 23575 24106 22966 23796 22678 22710 22994 22567 22803 22714 14510 17765 19470 19336 20295 19735 20284 20017 20147 41119 28079 25326 24864 24309 24154 23976 23744 23709 23569 23415 22901 22793 23189 22694 23101 22879 23272 17376 20381 20727 21713 20983 21819 21366 21492 21272 32873 25747 24813 23825 24087 23652 24001 23703 23863 23497 23627 23354 23482 23216 23420 23032 23386 9963 20182 20631 21613 21307 22061 21808 22594 22112 22912 28041 25459 23842 24449 23321 24214 22886 23825 22862 23527 22818 23303 22491 23273 22487 23217 22469 17843 20871 22279 22097 22855 22532 22880 22465 22688 22343 25536 23513 23584 23051 23715 22699 23511 22521 23324 22482 23200 22712 23467 22878 23577 22963 23478 21137 22995 22347 23351 22528 23290 22393 23379 22409 23120 23603 23739 23002 23313 22672 23422 22672 23244 22596 23187 22468 23178 22503 23328 22686 23433 22859 23469 23098 23543 23172 23431 23152 23406 23176 23352 23159 23227 22968 23214 22791 23192 22656 23106 22554 22976 22414 23000 22678 23037 22817 23330 22912 23457 23004 23620 23068 23530 23029 23644 23072 23916 23120 24156 22998 23940 22656 23087 22446 22484 22355 22105 22161 22128 22007 22436 22568 23168 23176 23709 24043 23520 23933 22912 23244 22917 23250 22724 22624 22656 22085 22341 21953 22322 22220 22448 22650 23076 22833 22821 23177 23587 23509 23736 23508 24320 23052 23519 23063 22938 23383 22832 23204 22523 22967 22595 23008 22872 23495 23109 23558 22983 23360 22901 23309 22848 23063 22688 22877 22541 22851 22512 22949 22727 23281 22998 23399 23185 23283 23190 23302 23015 23026 22914 22989 22483 23042 22449 22880 22624 23335 22862 23573 22880 23766 22684 23671 22742 23579 22582 23426 22544 23122 22510 22972 22326 23132 22341 23403 22513 23424 22792 23588 22796 23509 22928 23552 23064 23513 23070 23275 23076 23271 22860 23264 22705 23145 22652 23176 22478 23149 22352 23097 22612 23352 22770 23773 22768 23740 22600 23628 22549 23612 22564 23335 22354 23111 22484 22901 22470 23189 22725 23424 23032 23402 22992 23269 22699 23538 22690 23275 22340 22965 22329 23110 22764 23556 22924 23665 22804 23524 22641 23286 22725 22890 22564 22876 22436 23023 22742 23424 23129 23458 23141 23277 23062 23168 22993 23213 22967 23136 22761 23355 22542 22852 22328 22848 22465 22583 22822 23271 23143 23825 23269 24184 23074 24090 22606 23111 22551 22347 22427 22048 22100 22187 22297 23120 23457 23676 24024 23341 24034 23100 23833 22695 23030 22722 21926 22381 21883 22521 22833 23447 23415 23712 23480 24150 22820 23521 22761 22472 22853 22652 23133 22932 23604 22960 23616 22833 23317 22746 22985 22739 22710 22631 23098 22968 23441 23321 23163 23057 23053 22947 23172 22899 23116 22674 23102 22365 22853 22360 22791 22521 22979 22728 23206 22842 23437 22851 23589 22832 23658 22616 23607 22679 23351 21990 23177 22787 23008 22417 22912 22352 23100 22437 23340 22336 23364 22766 23536 22986 23489 22980 23261 22918 23193 22744 22770 22532 23187 22388 23130 22293 22934 22298 23120 22711 23414 22698 23724 22871 23729 22669 23739 22726 23753 22740 23712 22620 23520 22509 23274 22476 23177 22615 22954 22348 22984 5223 16811 17985 19479 19159 20164 19730 20609 20300 21063 31785 26775 24852 24694 24014 24092 18119 20457 20946 21479 21224 21952 21285 21783 21300 33299 25583 24581 23501 23648 23161 17930 20435 21643 21535 22092 21924 22315 22184 22697 22467 26531 24564 24547 24070 24295 17891 22513 22629 23178 22873 23370 22901 23623 23062 23693 25869 25107 23799 24682 23588 24512 22302 23773 22689 23557 22470 22993 21968 22429 22480 24887 23200 22855 22871 22641 22631 22308 23009 22723 22944 22723 22992 22802 23147 22829 23053 22704 22880 22702 22967 22725 23011 22866 23282 23009 23388 23062 23489 23107 23434 23064 23672 23094 23688 23062 23675 23079 23620 23004 23689 23055 23640 22979 23772 22969 23700 22946 23732 22994 23746 22885 23734 22884 23755 22856 23680 22857 23746 22805 23773 22787 23747 22716 23686 22716 23672 22711 23777 22656 23714 22775 23648 22665 23635 22704 23677 22633 23605 22449 23464 22529 23368 22217 23360 22413 23188 22087 23540 22509 23538 22773 23524 22612 23516 22529 23783 22755 23772 22597 23665 22820 23675 22824 23659 22772 23656 22907 23703 22953 23700 22914 23668 22983 23537 
22016 21590 22619 21904 21917 22119 22501 21436 22247 21840 22076 21561 22315 22019 22055 21688 22763 21546 22304 22109 22484 21365 22331 21775 22268 21392 22310 22115 22349 21609 22759 21848 22107 21459 22177 21952 22113 21297 21781 20250 21212 21273 21518 20327 21171 22079 21218 20954 22677 21232 20904 22209 22117 20391 21533 21892 21202 20473 21415 21978 20687 21112 22618 20855 21424 22696 21545 20883 22653 21972 20807 21585 22264 20896 21324 21811 21682 20716 21532 22288 20735 21403 22058 21841 21268 22322 21591 21515 21795 22000 21381 21751 21651 21901 21395 21761 21979 21544 21457 22259 21623 21913 22006 22070 21337 21723 21592 22093 21227 22167 21943 22201 21280 22113 21797 21750 21256 21873 21847 21904 21324 22225 21575 21965 21237 22028 21921 22056 21285 22137 21717 22038 21229 22061 21953 22045 21216 22229 21551 22080 21150 22038 21848 22382 21181 22045 21420 22435 21201 22153 21888 22275 21306 21816 21367 22627 21366 21903 21831 22360 21224 22123 21457 22473 21213 22253 21824 22375 21231 22005 21351 22687 21296 21975 21714 22348 21380 21916 21472 22608 21504 22168 22101 22336 74 2665 4423 7176 7131 8593 9071 10304 9990 10800 32401 29682 26231 25260 23904 24120 22951 23065 22387 23149 22132 22295 22243 22506 22043 22241 21614 22697 22000 22044 21524 22179 22109 22169 21536 22353 21644 22533 21615 21905 21840 22237 21475 21888 21624 22638 21656 21920 21728 22368 21830 21989 21370 22594 22080 21527 21112 21813 22758 22520 20794 21461 21366 23161 21888 21208 21169 22007 22417 21388 21103 22791 22155 22303 20909 21557 22613 22545 21925 21093 21264 22689 22144 22440 21129 21257 21937 22149 22387 21486 20976 21683 21687 23146 22293 21379 21238 21748 22984 22039 21161 21586 21879 22247 22189 21423 21923 21649 22557 21959 21644 21475 21984 22297 22073 21408 21804 21846 22433 21986 21775 21525 22192 22124 22187 21608 21719 21847 22393 21901 22337 21627 21752 21603 22141 22096 22348 21532 21857 21629 22560 21789 21863 21441 22114 22206 22269 21455 22178 21744 22470 21590 21884 21604 22224 21897 21989 21462 22323 21658 22496 21655 21944 21967 22441 21795 22021 21371 22604 21811 22338 21354 22078 21749 22496 21741 22124 21425 22327 21656 22352 21332 22182 21786 22335 21767 22027 21467 22448 21802 22451 59 8033 10361 12462 13169 14280 13595 14779 14568 15956 34210 29698 25876 25156 23986 23882 22683 22819 22118 22930 22140 22855 21847 22149 21473 22393 22084 22692 21760 22137 21530 22752 21813 22801 21571 22043 21436 22313 22040 22579 21787 22167 21271 22045 21396 22647 21884 22386 21607 21877 21513 22157 22244 22389 22003 22197 21394 21915 21513 22177 21614 22571 21702 22471 21783 22077 21452 21891 21497 22244 21976 22188 22115 22315 21963 22092 21371 22018 21605 22560 21757 22833 22131 22647 21749 21449 21043 21272 21034 21742 21376 21753 23028 22509 22816 22616 22147 22039 21420 21373 20885 21111 21063 21341 21307 22100 21423 22811 22071 23172 22345 22736 22103 21755 20992 21252 20820 21617 21671 21575 22196 22278 23021 22560 22970 22603 22549 22470 22359 22295 21924 21918 21409 21434 21388 21626 21779 21471 22097 21637 21875 21844 22364 21897 22016 22017 22003 22145 22071 22246 22080 22241 22229 22272 22296 22285 22250 22216 22182 22195 22288 22229 22360 22040 22421 22071 22384 22063 22332 21943 22425 21850 22345 21988 22295 22069 22304 22103 22288 21913 22259 22000 22381 22106 22499 22007 22400 22082 22325 22203 22452 22056 10252 14072 15875 16615 17398 17429 18038 17831 18433 18210 29338 25868 24453 23372 23255 22661 22662 22365 22599 22098 22405 21879 22344 21712 22333 21760 22216 21680 22148 21657 22185 21575 22186 21562 22503 21595 22256 21742 21937 21574 22296 21492 22173 21289 22109 21345 22263 21356 22268 21373 22091 21235 21999 21325 22001 21395 21984 21328 22110 21302 22073 21354 22130 21428 21891 21457 21829 21404 22000 21443 22176 21456 22144 21527 22325 21245 22039 21401 22062 21392 22147 21492 22192 21561 22116 21635 22497 21619 22135 21715 22222 21602 22129 21571 22104 21712 22423 21914 22613 21983 22727 21909 22700 21928 22534 21928 22607 21949 22656 21789 22621 21607 22583 21693 22620 21592 22455 21648 22150 21650 22080 21597 22068 21450 21902 21436 21858 21209 21751 21285 21540 21034 21392 20784 21385 20860 21390 21061 21376 20893 21220 21024 21176 21025 21019 20858 21164 21120 21133 21128 21348 21328 21368 21186 22480 21561 22768 21500 22912 21600 22960 21747 23111 21629 22796 21510 22725 21547 22729 21543 22962 21828 23044 21715 23004 21891 23127 21838 23075 21732 22909 21513 22636 21581 22198 21997 21897 22080 22171 22039 22064 11081 16348 18137 18818 19168 19555 19658 19841 19878 19968 28374 24862 23543 23001 22535 22435 22260 22172 22484 21888 22113 21847 22162 21719 22178 21704 22181 21686 22061 21466 22016 21464 22053 21575 22025 21729 22101 21661 22057 21449 22068 21442 21969 21670 22232 21705 22179 21405 21980 21298 21857 21392 21965 21646 22279 21783 22465 21874 22563 21842 22601 21800 22825 21760 22720 21623 22623 21609 22563 21522 22317 21496 22448 21647 22050 21271 22055 21337 22330 21572 22576 22094 22572 22096 22459 22034 22391 22151 22205 21738 22372 21383 22056 21287 22004 21516 22256 21744 22641 21772 22665 21633 22779 21517 22304 21479 22017 21301 21991 21384 22329 21851 22409 21788 22500 22076 22353 22137 22318 22023 22225 21592 22248 21328 22176 21592 22528 21753 22758 21613 22635 21537 22482 21613 22103 21356 21968 21393 22480 22029 22538 22135 22385 22059 22123 21834 22187 21640 22110 21466 21931 21510 22103 21686 22423 21959 22665 21854 22679 21682 22434 21577 22097 21626 21906 21500 22024 21427 22184 21762 22448 22150 22455 22144 22390 22253 22247 22016 22291 22025 21760 21404 21632 21170 21407 21542 21872 21757 22280 22230 22976 22337 19513 20220 21834 20678 21926 20448 21197 20277 20507 25856 23098 21938 21485 21214 21729 21974 22350 22459 22747 22981 22210 22604 22090 21401 21720 20928 21207 21013 21443 21211 21905 22155 22969 22385 23219 21816 22856 21538 21889 21332 21046 20938 21437 21616 22400 22665 22074 22592 21821 22312 21874 22038 21717 21915 21561 21978 21736 22234 21818 22297 22153 22288 22247 21998 22153 22004 21783 21845 21527 21736 21702 21835 21720 21967 21725 22041 21991 22503 22081 22705 21962 22611 21793 22598 21691 22096 21533 21985 21561 21878 21703 22347 22144 22489 22260 22328 22151 22126 21817 22147 21696 22117 21417 21927 21360 22007 21796 22433 21824 22594 21768 22683 21716 22533 22022 22091 21664 22073 21373 22090 21337 22305 21749 22535 22049 22464 22007 22388 21948 22307 21643 22020 21544 22239 21395 21958 21411 22134 21613 22448 21851 22717 21909 22667 21632 22560 21472 22023 21337 21989 21338 22476 22035 22583 22047 22359 21671 22101 21400 22136 21399 22102 21495 22256 21782 22627 21730 22688 21716 22400 21517 22172 21339 22050 21306 22129 21353 22406 21796 22649 21871 22416 21991 22326 21767 22258 21539 22222 21347 21991 21376 22104 21666 22516 21880 22695 21798 22639 21691 22545 21892 22058 21312 21932 21612 21949 21480 22193 21803 22432 22185 22417 22113 22366 22124 22126 21741 22344 21480 21957 21419 22002 21562 22040 21504 22184 21831 22351 21923 22559 21975 22951 21749 22517 21722 21624 21221 21433 20992 21804 21999 22598 22846 22172 22439 21849 21315 21385 21015 21604 22029 23100 22107 23002 21720 21612 21132 21089 21104 22208 22435 22545 22781 22293 22640 21812 21285 21297 21088 21616 22016 22784 22340 23211 22243 23217 21487 21948 21497 21149 20989 21451 21463 22342 22912 22248 22960 21789 22267 21632 21800 21549 22080 21917 22357 22272 22135 22121 22288 21639 21855 21636 21760 21696 21920 22048 22349 22062 22441 21931 22371 21751 22055 21840 21847 21492 21842 21568 22203 21893 22368 22183 22147 21943 22152 21575 21908 21494 21797 21595 22001 21927 22466 21889 22516 21575 22215 21392 21818 21367 22176 21749 22365 22133 22302 21848 22436 21447 21927 21426 22340 21933 22649 21602 22368 21607 21943 21271 21906 21440 22548 21987 22255 21879 22243 21369 22066 21229 22276 21745 22394 21882 22721 21592 22705 21574 22177 21350 22024 21557 22390 22067 22544 21939 22308 22065 22225 21622 22374 21355 22098 21431 22578 21824 22794 21697 22660 21520 22531 21542 22091 21303 22165 21507 22390 21857 22432 22066 22155 21933 3908 7755 10115 10510 11987 12039 13584 13193 14533 38912 32416 27440 26327 24192 24022 22671 23153 22357 22817 22029 22797 22333 22834 22529 22538 22297 55 8521 12708 13674 15163 15531 16725 16680 17543 16920 36117 29032 27056 24669 24393 23213 23069 22401 22658 21871 22436 21829 22471 21804 22388 21991 22521 6551 13817 16179 17664 18144 18423 18830 18889 18489 19025 30346 26464 23912 23230 22203 22320 21814 22332 22394 23008 22704 23463 22415 23447 22503 23515 22243 14364 16773 19155 18925 19173 19111 19265 19371 19897 19973 27364 24704 23945 22859 23255 23201 23069 23353 22745 23213 22230 22787 21935 22485 21901 22549 21812 18005 19604 19721 20252 20765 20651 21061 20891 21467 26729 24458 23213 23076 22723 22680 22373 22593 22593 22374 22455 22304 22400 22183 22363 22145 22148 22592 21853 22101 21789 21945 21614 21969 21504 21968 21654 22055 21767 22304 21940 22312 22069 22608 22128 22763 21952 22615 21800 22519 21784 22644 21612 22376 21627 22226 21621 22260 21748 22102 21645 21968 21559 22134 21352 22157 21506 22419 21940 22659 21981 22578 22048 22475 22030 22504 21890 22325 21633 22299 21398 22173 21360 22023 21623 22402 21798 22467 21879 22682 21857 22744 21703 22780 21575 22857 21675 22713 22065 22672 21480 22235 21434 22225 21606 22054 21367 22195 21660 22325 21981 22358 21856 22522 22062 22451 21967 22327 21710 22273 21415 22250 21345 22155 21575 22391 21793 22632 21874 22787 21865 22723 21708 22594 21668 22238 21330 22045 21429 22077 21477 22001 21552 22272 21955 22390 22200 22364 22240 22220 22000 22052 21680 22253 21467 21965 21507 21810 21356 21895 21617 22134 21899 22752 22110 23228 22112 23220 21676 22784 21565 22391 21586 21633 21854 21871 21350 21288 21096 21103 20993 21095 20956 21435 21502 22169 21525 22135 22001 22495 22585 22684 23157 21908 22487 21827 21520 21511 20980 21217 21081 21595 21668 21298 21553 21994 22429 22381 22210 22379 22121 21976 21454 21675 21880 21439 21819 21870 22069 21979 22120 22150 22539 21959 22412 21744 22176 21939 21943 21651 21877 21517 22264 21943 22468 22228 22477 22235 22235 22068 21942 21852 22151 21523 21881 21493 21968 21536 22295 21554 22187 21742 22425 21793 22498 22042 22627 21874 22587 21608 22461 21027 22196 21577 22005 21351 22070 21308 22332 21713 22587 21940 22502 22093 22357 22000 22155 21686 22193 21368 21997 21408 21833 21442 22141 21657 22429 21867 22704 21698 22801 21552 22491 21625 22115 21565 21963 21269 22119 21581 22468 22086 22311 22037 22238 21639 22269 21357 22103 21433 22406 21725 22515 21613 22749 21630 22643 21376 22082 21358 22000 21473 22360 21792 22168 21623 22417 21944 22352 22108 22381 22072 22312 22059 22125 21869 22141 21800 22195 21449 22218 21332 21851 21628 21991 21705 22193 21878 22420 22064 22877 22048 23241 22071 23100 21657 22611 21556 22545 21788 21470 20958 21056 20808 21289 21064 21632 21615 22389 21996 22512 22680 22532 23051 22375 22935 21942 22401 21911 22066 21817 21126 21560 20925 21167 20900 21340 20859 21109 21182 21698 21980 21873 22332 21921 22438 22258 22167 22240 55 7401 10294 11925 12648 13413 13784 13892 14734 14327 34904 29128 26955 24821 24107 22968 9489 13160 15634 16259 17373 17218 18007 17526 18274 35876 30195 26501 25728 23899 24144 10995 16179 17001 18962 18318 19502 18877 19670 19254 35840 28625 25996 24140 23853 22715 13676 16829 19078 19209 20320 19802 20480 20029 20560 20042 27608 24237 23797 22641 22830 16399 19726 19804 21120 20592 21623 21079 21876 21347 21953 25456 24331 23113 23266 22521 23006 22475 22893 22558 22659 22397 22657 22213 22482 22028 22528 22162 22597 22160 22474 22123 22452 21972 22380 21953 22731 21800 22316 21764 22669 21689 22496 21657 22275 21562 22120 21403 22159 21531 22137 21562 22192 21479 22160 21600 22138 21609 22123 21542 22053 21415 21764 21313 21953 21461 21668 21136 21435 20989 21469 20861 21379 20892 21313 20770 21216 20817 21236 20878 21269 20848 21303 20938 21253 21051 21291 21294 21609 21592 22039 22144 22363 22043 22344 22327 22599 22018 21593 21600 21655 22125 21734 22211 21551 22165 21447 21957 21512 21900 21811 22011 21847 21783 21771 21808 21765 21858 21818 21852 21745 21809 21789 22108 21504 
22236 21593 21524 21648 22153 21319 21710 21644 21992 21160 21723 21965 21555 21416 22276 21479 21639 22001 22166 20794 21701 21804 21997 20552 21507 22839 21593 20912 22464 22243 21109 20792 21619 22544 21253 21234 22715 22145 21131 21324 22407 21392 20896 21352 22857 20968 21259 22562 22554 20844 21259 21718 22504 20655 21059 22077 21785 21591 21751 21917 21528 21456 21490 22168 21568 21376 22026 21953 21325 21792 21825 21644 21291 21614 21941 21706 21376 22410 21365 21768 21797 21945 21196 21948 21635 21712 21523 22007 21441 21619 21274 22176 21144 21794 21687 21993 21159 22336 21583 21725 21552 22149 21284 21470 21452 22173 21249 21811 21850 22096 21153 21813 21545 21873 21161 21748 21963 21811 21340 22103 21749 21842 21166 21721 21973 22058 21181 21934 21595 22068 21211 21772 22136 21847 20972 22333 21932 21832 20701 21616 22683 21969 20871 21652 21572 22688 20832 21643 22662 22383 20837 21123 21447 22839 21233 21453 22187 22456 21306 21292 21865 22215 20825 21283 22752 22322 20789 21201 21622 22837 21261 21353 22345 22555 21149 20881 21389 22825 21264 21413 22141 21888 21576 21408 14875 17596 18182 18051 18965 19075 18954 18732 19150 34144 25597 23104 22749 22437 22196 21505 21809 22167 21813 21416 21918 21832 21783 21360 21619 21862 22042 21432 21621 21577 22257 21577 21629 21661 21916 21725 21675 21670 22081 21792 21922 21236 21696 21892 21799 21296 22063 21765 22082 21368 21621 21765 22117 21557 21717 21396 22288 21671 21650 21315 21874 21873 21943 21255 21894 21404 22361 21299 21718 21723 22209 21452 21575 20850 22263 21751 21872 21125 21829 21912 22172 21492 21579 21546 22199 21639 22116 21266 21793 21684 21999 21731 21884 21101 21739 21380 22325 21365 21798 21377 21979 21954 22072 21317 21968 21466 22352 21504 21743 21204 21940 21831 21960 21309 21956 21425 22252 21412 21622 21233 21864 22039 22125 21430 21558 21494 22348 21723 21760 21236 21778 21657 21931 21865 21913 21178 21752 21572 22327 21617 21632 21302 21824 21970 22097 21290 22043 21658 22188 21392 21699 21655 22054 21687 21603 21207 22294 21824 21925 21127 21623 21913 22385 20976 21127 21539 22823 22138 21344 20628 21376 22738 22506 21172 20736 21133 22707 22208 22152 20597 21578 22715 22533 21312 20679 20592 22731 22373 21511 20600 21592 13106 18983 19629 19170 19467 20104 20161 21634 20703 20000 25547 23541 23432 22756 21173 21127 21336 23104 22395 21849 21380 21472 21864 21760 22153 21650 21437 21332 21660 22061 21920 21417 21464 21528 21957 21648 22060 21924 21530 21319 21812 21753 21750 22061 21978 21474 21517 21517 22016 21729 22213 21750 21575 21195 21745 21617 21760 22009 21867 22068 21903 21447 21626 21498 21796 21534 22193 21760 22322 21680 21879 21309 21543 21222 21764 21792 21955 21877 22091 21504 21740 21283 21571 21426 21860 21463 22165 21623 22332 21761 22320 21760 21717 21145 21757 21142 21934 21433 21739 21707 21862 21963 22064 21969 22064 21836 22172 21511 21748 21233 21656 21443 21842 21353 22215 21582 22431 21684 22352 21729 22132 21241 21762 21211 21638 21100 21845 21204 21934 21239 22009 21609 21852 21624 21788 21833 21924 21976 22081 21932 22161 21985 22202 21629 22039 21659 22074 21376 21847 21301 21717 21177 21697 21349 21635 21348 21611 21199 21580 21325 21616 21248 21593 21537 21652 21348 21688 21452 21701 21314 21667 21456 21672 21412 21676 21570 21660 21405 21612 21307 21776 21623 21574 21419 21679 21363 21572 21444 21568 21337 21574 21344 18113 19507 20438 20169 20608 20391 20697 20305 20608 28339 23351 21700 21776 21202 21613 21315 21568 21213 21635 21211 21760 21541 22128 22001 22199 21948 22337 22243 22445 22551 22497 22715 22383 22259 22468 22343 22489 22312 22475 22530 22509 22613 22391 22803 22292 22765 22516 22741 22316 22878 22353 22816 21952 22764 22119 22705 21929 22692 22409 22819 22304 22849 22075 22343 21611 22113 21543 22072 21572 21973 21533 22091 21617 21996 21604 22075 21640 22052 21632 22068 21609 21928 21491 21877 21592 21808 21017 22017 21638 21898 21519 21877 21564 21931 21506 21712 21595 21592 21445 21567 21438 21534 21388 21624 21537 21469 21504 21565 21289 21485 21365 21760 21408 21837 21611 22052 21739 22086 21876 22147 21920 22088 21992 22112 22016 22045 21993 21852 21985 22070 21991 21920 21927 21850 21964 21824 21808 21784 21732 21875 21868 22025 21893 21989 21879 22005 21943 22064 21923 21969 21924 22135 22020 22101 21691 22107 21580 22054 21529 21925 21575 22002 21447 22003 21577 22142 21606 22109 21591 22097 21344 21911 21317 21962 21447 21830 21323 21898 21324 21901 21452 22011 21643 22204 21747 22160 21910 21894 21459 22055 21550 17562 20388 21408 21049 21596 21203 21767 21294 21909 21482 24487 22417 22379 21680 22163 21720 22231 21728 22167 21917 22279 21913 22118 21896 22113 21871 22262 21955 22117 21872 21939 21953 22092 21994 22217 21996 22119 21959 22103 22009 22028 21955 22205 22016 22169 21982 22154 21973 21920 21955 21924 21905 21844 21726 21863 21515 21842 21156 21809 21143 21399 20918 21216 20877 21112 21192 21460 21459 21969 21825 22509 21741 22226 22351 23092 22112 22929 21479 22097 21204 21301 21060 20764 21236 20791 20912 21217 21102 21770 22028 22473 22700 22393 22748 21870 22179 21402 21214 21496 20601 21269 20676 21241 21814 22464 22347 23041 21893 22664 21352 21613 21095 21532 21401 21024 21385 21385 21484 21459 21796 21841 22128 21781 22210 21626 21696 21674 21477 21355 21591 21678 21921 21984 21966 22064 21770 21865 21635 21557 21760 21284 21585 21352 21685 21768 22105 21833 22265 21800 22252 21565 22080 21497 21715 21379 21520 21410 21486 21389 21857 21816 22052 21992 22064 21949 21968 21881 21850 21655 21409 21313 21753 21319 21657 21403 21633 21728 22091 21824 22103 21722 22332 21609 22227 21557 22034 21415 21882 21333 21657 21298 21622 20304 21294 21072 21667 21340 22092 21720 22081 21867 24342 22409 22009 21950 21863 21569 21193 21340 21735 21248 21637 21444 22076 21747 22417 21736 22314 21442 22196 21341 22118 21282 21723 21299 21559 21274 21921 21507 22165 21875 22103 21959 21960 21672 21834 21320 21709 21244 21850 21764 22186 21805 22400 21654 22386 21504 22199 21256 22004 21336 21687 21273 21685 21267 21891 21630 22247 21858 22184 21933 21984 21829 21978 21651 21780 21632 22306 21268 21778 21209 21602 21354 21800 21537 21815 21699 22231 21784 22320 21581 22135 21357 21745 21497 21632 21296 21688 21340 22096 21788 22151 21808 22176 21975 22032 21930 21807 21552 21554 21337 21632 21158 21436 21488 21877 21847 22977 22112 22972 21952 22800 21421 22023 21609 21042 21137 20835 20836 21248 21070 22105 22199 22499 22550 22629 22889 21966 22453 21512 21562 21576 20759 21400 20587 21103 21216 21912 22320 23059 21914 22650 21265 21603 21068 20821 20883 21725 22020 22414 22740 22204 22644 21664 22073 21434 20919 21264 20710 21355 21753 21927 21996 22138 22016 21962 21801 21923 21622 21632 21592 21351 21527 21447 21521 21708 22027 22028 22071 21931 22219 21733 22112 21643 21769 21681 21457 21431 21639 21546 21873 21735 22124 22051 22021 22013 21929 21944 21760 21628 21628 21415 21601 21288 21511 21389 21760 21727 22032 21895 22279 21717 22296 21660 22284 21561 22007 21456 21719 21535 21629 21323 21626 21315 21863 21837 22176 21991 21989 21959 21861 21660 21824 21157 21632 21379 22092 21746 22433 21493 22099 21424 21752 21269 21825 21549 22148 21904 21985 21876 21755 21345 21873 21250 21608 21377 22018 21781 22281 21561 22167 21372 21782 21423 21735 21287 21710 21313 22142 21881 22152 22016 21969 21588 21861 21224 21652 21312 21639 21504 22112 21735 22341 21376 21934 21523 21716 21066 21910 21591 22311 21920 22126 21838 21953 21783 21960 21338 21702 21049 21646 21300 21904 21606 22269 21719 22248 21578 22238 21440 21908 21532 21667 21299 21891 21702 22194 22039 22038 21888 21901 21788 21884 21319 21760 21169 21666 21618 22129 21754 22293 21460 21905 21515 21596 21248 21711 21585 22204 22080 21886 21868 21830 21049 21320 21464 22151 22106 22898 21942 22800 21328 21216 21024 21195 21481 22416 22740 22328 22313 21456 21479 21600 20637 21032 21043 21782 22201 22941 21872 22778 21193 21383 21328 21110 20919 20893 21184 22030 22187 22469 22771 21842 21922 21530 20629 21306 20614 21205 21472 22167 22353 22990 21888 22624 21347 21474 21709 21467 21523 21519 21895 16665 18364 18653 19236 19001 19172 18982 18995 19086 29336 24183 23065 22581 22263 22390 21899 22031 21744 21740 21632 21321 21632 21308 21530 21426 21732 11442 18569 19613 20449 20053 20619 20009 20237 20171 20329 26441 23644 22433 22361 21998 22121 22032 21997 21842 21825 21832 21813 21784 21740 21524 21528 21387 15863 18944 20362 20248 20756 20816 21236 21024 21655 21021 25264 22775 22722 21788 22419 21409 22126 21365 21687 21269 21626 21089 21675 21136 21649 21172 21636 18448 20809 20936 21533 21430 21568 21409 21380 21224 29281 22890 22528 21554 21971 21207 21749 21185 21677 21155 21789 21383 21929 21493 22040 21753 22076 21629 21183 21270 22033 21408 22075 21361 21910 21184 21656 24038 22336 21498 21708 21176 21632 21533 21703 21184 21597 21101 21728 21281 21984 21462 22046 21608 22131 21869 22117 21845 22024 21944 21997 21889 21872 21752 21733 21453 21888 21383 21865 21185 21628 21165 21557 21248 21624 21413 21820 21541 22045 21761 22223 21733 22272 21665 22173 21797 22288 21788 22560 21680 22672 21539 22471 21476 21733 21085 21044 20968 20816 20812 21026 20857 21207 21398 22007 22201 22500 22772 22191 22752 21665 21677 21838 21505 20874 21200 21352 20641 21127 20675 21018 21177 21358 21239 21863 22153 21737 22022 22449 22246 22661 22311 22928 21747 22595 21671 21537 21604 21545 21659 21229 21563 21409 21511 21747 22039 21938 22183 21763 22044 21594 21859 21700 21518 21383 21368 21348 21529 21552 21728 21666 21940 21928 22076 21989 21968 21931 21825 21937 21648 21559 21618 21304 21523 21256 21501 21419 21894 21729 22436 21780 22208 21463 22056 21488 22153 21476 21915 21677 21504 21289 21573 21271 21634 21273 21924 21640 22055 21737 22130 21888 22184 21804 22096 21920 21955 21884 21943 21832 21823 21665 21763 21376 21752 21463 21640 21176 21796 21179 21687 21509 22059 21650 22363 21669 22301 21357 22099 21322 21927 21305 21877 21460 21607 21366 21593 21416 21979 21678 22248 21877 22043 21773 21932 21560 22259 21495 21639 21189 21674 21248 21723 21575 22204 21728 22336 21654 22215 21377 21814 21411 21590 21352 21629 21182 21727 21418 22026 21805 22087 21995 21969 21850 21765 21643 21777 21699 21814 21477 21752 21187 21760 21127 21410 21069 21447 21556 22081 21978 22656 22002 22804 21815 22897 21303 21954 21272 20933 21147 20823 20855 20960 21062 21980 22199 22518 22688 22153 22544 21909 22372 21408 21533 21517 20688 21018 20759 21248 21754 22181 22296 22561 22344 23012 21626 22272 21296 21100 21428 21383 21632 21797 22155 21875 22125 21652 21931 21706 21519 21640 21463 21410 21625 21801 21978 22040 21784 21955 21685 21589 21715 21703 21683 21369 21836 21222 21613 21328 21418 21490 21717 21626 22068 21769 22182 21831 22253 21632 22214 21436 22029 21358 21838 21286 21673 21444 21591 21400 21544 21175 21767 21347 21962 21598 21872 21687 22131 21938 22093 21829 21869 21696 21808 21549 21926 21265 21654 21267 21644 21268 21600 21200 21671 21453 21979 21565 22177 21718 22412 21559 22329 21461 22316 21536 22319 21447 22200 21427 21968 21868 21649 21373 21646 21146 21707 21297 13628 17008 18604 18418 19288 18848 19759 19461 20065 19761 26477 23847 22983 22337 22306 10935 18181 19514 20170 19863 20651 20007 20585 19997 20601 26304 23588 22057 21993 21512 21875 17941 20061 20339 20807 20816 21138 21048 21514 21351 28922 23841 23471 22541 22967 22352 19676 21003 22217 21703 22221 21845 22584 21790 22568 21629 24492 22408 23223 21975 22955 19265 22031 21080 22220 21024 21559 21056 20903 20877 20981 22425 21340 21318 20953 21211 20776 21187 21296 21539 21285 21464 21500 21559 21549 21635 21464 21376 21539 21355 21527 21521 21769 21802 21783 21904 21808 22203 21803 22001 21811 22131 21760 22209 21656 22081 21713 22175 21601 22129 21620 22188 21728 22232 21729 22131 21709 22219 21646 22240 21598 22310 21600 22208 21681 22221 21640 22320 21576 22222 21540 22260 21424 22199 21379 22198 21447 22261 21427 22128 21480 22189 21481 22089 21322 22131 21316 22056 21359 22021 21638 21644 21301 21846 21443 21600 21404 21813 21321 21937 21312 21920 21415 22016 21341 22041 21284 22241 21381 22338 21637 22384 21608 22449 21616 22284 21707 22316 21657 22272 21583 22286 21788 22262 21644 
40951 34183 32822 34145 39913 41327 35616 34424 38247 39448 35681 38181 33536 41809 41371 43110 34789 38385 40248 35621 35188 36226 38599 32753 32593 36950 33954 36498 43079 41414 39184 35510 34247 33264 40097 40370 35995 39784 39318 41304 42963 41867 36652 41408 37461 37401 40483 33952 33595 35936 40451 35603 43591 34470 38286 39465 36169 34024 35793 37610 33024 42104 43072 40439 33600 41268 38823 37971 41330 36169 36395 34439 40752 34523 37740 35600 41563 36865 35857 34743 40151 35815 35934 42753 42140 41862 43139 36415 37856 38982 39980 37336 34770 36598 41703 36855 35398 32842 42218 41800 40615 35904 38008 37356 40275 39793 36082 33871 39944 37395 35852 35024 33335 36884 39493 35827 38137 36426 41331 39873 35969 36584 39641 35579 38166 39080 39960 37986 34144 38929 40266 36025 39856 37008 37559 42118 37971 36551 34641 33979 35248 37981 36423 34477 33472 34980 35655 34456 34882 42608 36248 39001 42612 37383 40245 42759 40859 43360 41239 41024 37245 40877 36019 40641 36157 41656 35629 39812 34497 36900 40485 41680 42330 34149 39308 36432 41849 37070 40228 42198 40410 37134 33645 41618 34785 32093 38092 37111 36525 37671 36384 33984 38556 35378 45700 40136 36416 42992 40760 32888 36104 40266 36560 41985 37876 36569 36083 41345 34536 36884 38829 42269 34608 33632 41051 33932 34405 34695 37448 35632 34915 34676 39105 36037 37448 40325 35095 37043 36305 40616 39477 35911 39173 41681 34599 35680 39697 33640 35280 41641 41416 35129 34368 40899 37213 37053 37984 40472 37408 41962 42528 41146 35619 35518 40560 42660 34103 36045 41412 36135 36902 39060 36717 37376 40321 43024 34172 33184 40535 34657 39527 40480 36231 34877 38647 35641 37239 39016 35895 41476 42083 41904 36426 41481 38594 37936 39172 41172 38152 42709 42232 32850 35751 39832 37872 36742 37945 41147 38105 42163 41492 42160 34604 40148 37073 38912 40048 42400 33774 42788 42397 35831 35474 40216 36001 34625 37709 37068 37509 39728 35909 33530 41806 34420 33990 40758 36488 38051 39449 40880 39136 34771 40376 41782 35396 34647 38871 35210 33994 40024 41607 36535 37622 39184 34587 37425 42481 37615 39184 33304 36770 39995 41312 33721 41216 36086 43724 39815 34677 39168 35725 40459 40072 33528 33543 35665 33398 40592 34496 33105 35814 42358 33219 33146 33639 35468 36760 33675 38557 31789 38437 39407 34336 34609 37290 45257 44949 43620 36418 39619 39296 41320 39936 42928 37092 41557 42745 37200 35552 39990 34576 42336 41410 34905 39104 37485 42115 42807 33333 37871 34374 38957 37623 33168 40984 36417 35863 35785 39137 38373 42674 33358 32868 38133 35524 40704 35989 33747 39810 35803 34144 35409 38612 37227 39087 37649 42520 34659 42887 36354 33258 40284 35674 41647 34969 37216 41107 33625 40052 35820 35890 37941 37235 39529 32695 35520 40583 33844 41911 37104 42711 40464 34628 41841 35851 41555 35712 35348 39237 36145 39221 37927 42360 36034 35332 36920 38177 38984 38160 38983 36761 40295 33108 35552 40176 34711 42240 36872 41496 41081 34105 42992 35176 41862 35686 39781 40587 35793 40128 34539 38795 36869 39900 37975 40567 38806 34275 36765 34281 35977 36593 37526 38212 39264 37845 40096 38422 40720 34702 38796 34839 39145 41485 37096 40898 35595 39643 35178 41376 34560 41216 34499 40003 33942 41113 34279 39907 34123 32976 34304 41196 35174 42374 35457 40848 34956 42221 35000 41833 35126 33446 34534 41940 34464 40966 35925 34394 33569 42049 35369 41554 33805 42112 33685 41161 33888 41042 37874 32218 41992 39728 33271 41641 34693 40678 33298 44689 42968 35360 35650 39764 34453 40864 33591 40032 34455 40024 35636 33200 39491 38568 40768 38087 41912 41329 43440 34136 43432 36113 42697 41570 43464 42434 43893 41925 43776 33656 43767 34866 42634 36835 41363 36659 43800 36345 41741 37828 42134 36802 37775 36391 39859 35649 37672 35349 42603 37033 41419 37253 39392 42260 34553 39501 33536 38987 33669 38091 33344 39360 34312 38409 34081 39236 34437 38760 34208 38962 34284 37488 42944 37468 33888 36024 37944 38480 34451 37191 33181 37047 33616 37677 32717 34960 33952 33718 42215 34109 42296 33560 41568 34528 33004 42584 32857 33549 40581 43168 41944 35750 41712 36992 34284 38743 35840 39298 37190 39978 37516 39323 38468 39574 38432 39075 38568 36970 38294 39259 38633 37476 37776 36886 38112 36384 36121 35919 35451 37100 37088 38638 37315 38441 37376 38656 38041 38976 37697 38111 37577 40098 38598 39634 35306 39649 33896 38840 33206 37487 33808 38328 42551 38845 33829 40023 34244 39639 34136 39280 41280 37760 41088 38255 42549 36824 41212 37485 41167 37635 42496 39035 34631 40588 35957 39893 37597 37253 42545 39336 33600 31541 41305 41984 38491 34080 39813 36019 40847 37607 42860 45027 43080 42884 35031 40076 35480 41009 35543 40246 37792 41420 37709 39783 37306 39619 37415 41376 38176 39815 37074 37831 37913 39491 38583 40896 38691 39958 38272 39731 38816 38761 38084 40864 38486 40336 38576 40133 38368 37460 38016 37585 37339 36699 35623 37042 33038 36440 39308 36367 39343 42102 37104 39944 36594 38914 39816 42597 42821 38314 36480 43904 36125 40759 42512 39964 39656 38050 42964 39704 40024 41073 38483 35184 40192 35692 36559 40006 39112 35911 38605 43479 35831 42623 36400 37191 40406 42084 40472 43080 33721 40356 34254 40299 36528 43028 42488 39313 37376 34984 41305 34569 38816 33296 41689 37973 41763 41947 43122 42871 36343 36611 39680 36123 40581 34583 34853 34738 42651 41889 34269 34877 37413 38176 38279 38976 35941 37012 34344 33393 35366 40503 33929 41243 35213 35648 39547 36740 41402 36343 41226 33941 38968 43112 35672 41559 33046 41687 43216 42160 37077 36356 38842 38453 38999 38152 38032 37308 36864 34720 41880 41152 36097 41130 34850 41911 34455 35233 39424 36426 39656 35578 41880 34423 40807 33712 38498 42240 37497 41300 34881 40646 34533 40560 41073 38503 34850 41217 39632 35469 39131 37233 43101 42987 38976 38157 37172 33568 39824 41506 35968 40005 34520 42135 39495 35904 42608 35812 41659 42476 40760 41664 39973 40705 35780 40808 33834 40391 37652 32818 40009 37284 39682 38252 38036 34807 36544 40992 35603 40425 36977 35672 40384 36560 42312 34856 42356 32867 40537 40405 38681 41288 35350 40482 35189 40370 37345 34565 41152 37018 40368 38004 38213 36634 38272 34633 35788 34072 41299 40608 36003 40020 34119 41353 36326 33104 36336 35129 40972 36128 41561 34134 39952 41808 35912 42960 34402 40521 35124 41251 39479 36204 40073 36285 40114 38473 38598 37785 36564 33245 33218 41139 34308 39316 42438 42992 37444 36921 38491 39563 38679 37854 36413 42244 38954 34199 37965 39154 36072 35859 39955 38698 39669 40833 43904 34041 34613 37556 38261 43301 33123 33416 33416 34986 41690 33544 38936 40009 37522 41619 39592 37632 35081 40279 34274 38386 35862 36364 35570 38376 42881 36193 40680 35059 34471 39168 42373 37252 40256 34784 41492 36086 37723 38549 40077 38457 38136 36320 37589 34380 34000 33744 41400 33415 42301 33185 35106 38656 38740 39384 37923 40970 35808 39453 34666 35759 34807 42326 42624 34763 33221 36873 35728 39777 39072 38683 38915 37798 37848 35575 34387 34330 42020 34236 40506 33141 41660 35720 35673 38452 37416 41412 35637 41347 34910 41269 33803 38616 42400 35790 33327 34397 41088 34598 40884 37271 36801 40133 38672 38509 38195 37056 34716 36236 39424 34245 41472 39655 35787 42794 43277 39827 42136 36033 40477 36588 33466 39720 37303 38296 37149 36021 41269 37241 40172 34241 41358 38596 36068 41268 33783 40180 41907 36242 42336 35988 40762 35584 40816 40333 37392 39968 38447 38160 33868 36864 40147 34638 40682 34664 32454 39268 35833 41972 41641 38073 33074 35125 38355 37499 34042 41628 37587 39992 36932 37876 36152 37928 41369 35419 38224 34633 40665 37338 34140 41410 35727 41047 33948 41026 42340 37591 33207 34597 40736 37360 35205 40371 39053 38883 37067 37463 36133 37261 41194 35716 39445 34756 34073 39672 36010 41424 42713 37570 33052 33825 39897 35649 33685 40535 39244 37509 37128 36569 38279 41050 42727 40352 39776 37792 37909 36411 40972 40134 37908 39984 42964 42833 36189 41784 41986 42585 43224 34145 33719 37812 38202 36016 40608 38427 37024 36533 39844 41930 41224 39206 37095 36672 39503 38871 40640 43542 36731 36653 37519 33123 33457 40775 33573 39817 42628 40550 42252 39074 37106 34523 41309 42864 35677 42698 33320 32982 37120 32161 40120 33472 39120 37079 38794 36809 36887 37930 44800 42024 39712 34277 41350 42816 37680 38941 35691 35664 34061 40967 34310 40858 33319 41882 35712 28444 31744 33249 42080 38487 33655 37635 40211 39780 41312 44960 36007 42811 42560 38860 39900 38662 38710 36713 36435 36520 36404 35924 35668 32900 32818 41603 35488 35996 41317 40308 35036 35451 40226 37876 34744 37920 42068 36806 35658 36036 42730 42193 40215 41825 35392 40463 34589 38537 35057 38913 34560 39405 34373 30346 35338 36869 33272 42032 33672 41728 41779 40364 44386 37996 33244 33180 38007 40180 35981 39620 35152 39323 36305 41734 37895 43010 39006 35969 39241 34646 39833 40625 38808 41881 39584 41639 37664 39575 34672 39874 41909 43300 35605 39541 34247 33138 35137 39445 34252 38880 35440 40456 38315 42636 39238 34196 39779 37326 39776 36912 38523 37876 38673 37178 36960 35783 35572 42528 37197 41795 37249 39681 34583 39557 33657 39879 34418 41913 36715 33280 38824 35719 41016 35794 40935 34848 40308 36352 41167 36289 33604 34615 34841 33153 43277 43008 35924 38784 38209 37464 35573 35626 37775 36314 40064 41971 38936 40740 43825 36657 40738 36162 34637 34940 36600 32696 36232 39732 41513 33910 39018 34265 37738 39715 41760 40707 37264 40064 35787 38506 43120 41440 35210 41696 38008 35864 34240 34798 33036 33817 33192 34600 40290 33852 41731 33191 35609 38824 37783 40559 35896 38844 34062 36844 35048 32968 41576 41824 41589 33370 33057 35165 34542 37632 37608 39314 38512 38044 37867 36488 37688 34379 33509 34026 40704 33229 40066 43328 42534 37480 35488 42845 36148 40464 42885 39200 42827 40336 42842 37896 35043 32496 40552 33883 40465 34400 40420 37684 34348 38967 35751 39737 37104 40347 36436 39268 37495 38009 37332 37992 36568 36728 34656 35651 41334 35973 42664 34619 39496 36200 39787 35260 32752 38936 34531 42256 35048 41584 41888 39754 41255 37984 41011 37392 42480 34517 41527 34192 41829 38592 35096 40997 37378 38977 36096 37707 33510 41064 43306 34839 39712 34996 39938 35704 33736 40544 35515 41687 34824 40785 41708 36634 42013 34164 41243 34757 39746 35853 42026 38848 36491 39450 38698 38168 36901 35796 34508 35736 35114 36329 42752 36064 39736 35654 39093 41992 38822 42576 33668 39032 38354 34791 38393 36570 36532 37665 41068 38085 40477 37209 39424 36029 36294 37133 38375 38358 40764 44137 35504 40020 33616 37324 42336 42065 33593 32858 33996 37720 35144 39926 36001 40328 41568 33970 41824 39139 34534 40912 40816 39068 42252 42026 34352 36079 40120 37313 39977 34624 37724 35294 33100 34124 42542 42144 34656 36118 38250 38780 36037 37952 35079 33828 35235 35237 34891 41602 36864 40197 34505 40876 42300 43104 35684 34338 38949 35926 40343 36839 41353 34329 40641 42522 39052 41756 37014 40728 35058 42178 34304 41649 33479 39593 36021 41345 38253 34179 36812 35108 39832 37817 39605 36698 37200 34957 36071 33472 37449 40391 34789 40375 34664 40289 34021 39600 35022 42480 38616 33813 40087 35544 42631 33904 41767 42840 42064 33284 41804 42759 40834 42416 38217 37073 34471 41728 34818 39208 35468 40672 31600 35568 32539 40604 40058 35231 35124 31413 38041 35091 45072 38297 38818 41972 41758 33564 38208 32332 39296 36373 33948 37668 33230 37527 33457 43012 35079 38961 38561 32871 36875 35951 38411 41344 35888 35497 38999 38247 32938 41352 40652 37827 44000 34058 38440 42024 34406 37672 40840 35492 40880 36964 34080 36080 33808 34444 44551 42956 41651 38575 38516 39703 39040 38647 40960 37946 33709 37976 36841 36448 37644 42907 41661 41343 37512 40192 35316 39692 40762 33447 40524 42705 43361 33947 33344 34158 42357 41645 33477 41440 33407 32727 35635 36176 36069 37144 36155 40730 36535 38464 36437 39889 35656 40552 34719 39106 35367 40454 34149 39680 34368 40378 35513 40841 35649 39856 35543 40861 34774 40803 34311 41536 34082 40356 35034 40880 34504 41478 33852 40816 33363 41077 42183 40964 41825 40833 42709 41635 42454 39952 42885 40887 43042 39686 41249 40120 41104 39128 41888 38813 34389 34376 40776 36971 42337 34132 41784 36638 41104 37904 40844 37572 42208 38560 41552 39063 40688 41191 41877 42128 34640 42240 34321 42928 34369 41233 35568 41681 34881 40898 34221 41332 36291 41318 34693 
23181 23350 22811 23301 23361 23207 23336 23784 23168 23168 23349 23592 22736 23437 23244 23195 22887 23367 23307 22649 22852 24297 23251 22734 23574 23897 22733 22572 23027 24055 22391 22912 23963 23884 22505 22761 23292 24023 22292 22977 24238 23088 22604 24039 23723 22613 22587 23233 23796 22320 23171 24249 23639 22555 23347 23183 23319 22824 23203 23469 23192 22912 23453 23298 23020 22976 23306 23252 22990 23078 23575 22996 23024 23222 23468 22903 23037 22829 23670 22896 23145 23403 23495 22784 23388 23282 23059 22794 23388 23145 23062 22801 23624 22976 23383 23254 23429 22728 23588 23076 23071 23000 23521 22851 23102 22802 23752 22630 23485 23117 23502 22641 23400 23054 23371 22645 23172 23260 23214 22695 23696 23128 23143 22886 23515 22808 23091 22805 23680 22711 23335 23299 23281 22887 23512 23095 23080 22926 23650 22655 23201 22932 23610 22682 23271 23300 23239 22827 23674 24053 23141 23383 24522 24402 23378 22903 23607 24645 23525 23329 24838 24073 23067 23351 23980 24205 23145 23173 24656 24352 23224 23048 23656 24616 23380 23268 24429 24353 23164 23463 23671 24084 23356 4446 17005 17888 17591 17893 18085 18797 18399 18381 18651 29652 26402 25431 24992 25370 24733 24418 24561 24722 24057 24046 23976 24672 24064 23936 23696 24216 24169 24086 23756 24381 23969 23923 23533 23932 24072 24202 23472 23811 23595 24331 23661 23813 23853 24231 23544 23682 23456 24273 23798 23613 23340 23867 23840 24032 23291 24028 23671 24002 23193 23799 23666 24071 23310 23585 23289 24234 23605 23671 23185 23765 23773 23740 23171 23692 23370 24153 23309 23599 23369 23808 23668 23789 22986 23640 23237 24086 23465 23513 23140 23671 23585 24044 23125 23461 23393 24064 23506 23592 22973 23621 23613 23924 23284 23434 23222 24050 23549 23858 22969 23815 23449 23943 23073 23440 23168 24021 23504 23645 22951 23814 23450 23738 23552 23627 23181 23780 23384 23960 23348 23372 23073 23497 23660 23872 23204 23321 22940 23871 23462 23623 23037 23477 23488 23781 23442 23269 23113 23956 23392 23319 22983 23469 23616 23756 22925 23488 23281 24073 23339 23022 22925 23395 23930 23143 22756 23349 23581 24232 22886 22908 23495 23680 24071 23177 22730 23091 23199 24559 23424 22912 23313 23644 24369 23313 22744 23188 23205 24256 23089 22713 22928 16572 19421 19516 18581 18638 19136 20544 20231 20225 19252 25730 24846 24861 24848 23655 23897 24417 24353 24637 23927 23376 23611 23575 24248 23753 23632 23306 23632 23537 23816 23767 23576 23201 23495 23351 23926 23695 23753 23256 23323 23248 23461 23639 23832 23603 23574 23192 23421 23264 23939 23431 23726 23329 23274 23008 23472 23407 23533 23682 23670 23365 23469 22946 23271 23025 23543 23109 23939 23406 23859 23249 23400 22962 23425 22949 23463 23506 23782 23445 23530 22954 23213 22871 23286 22953 23512 22967 23908 23169 24024 23266 23838 23012 23272 22767 23313 22816 23593 23016 23452 23264 23522 23367 23628 23468 23662 23335 23567 22869 23252 22856 23296 22994 23465 22898 23924 23060 23836 23328 23870 23126 23329 22840 23311 22779 23191 22704 23418 22720 23370 22784 22739 22980 23390 23072 23234 23274 23520 23528 23590 23370 23712 23296 23719 23157 23664 23139 23577 22973 23592 22656 23228 22739 23196 22665 23252 22768 23280 22799 23151 22656 23202 22935 23136 22841 23120 22886 23120 22813 23109 23051 23040 22848 23094 22856 23008 22892 23114 22855 23141 22942 23118 22912 23078 22848 23017 22791 23017 22807 23052 22759 12968 18653 19755 19531 20202 19827 20397 19940 20473 19932 26211 24046 24263 23611 24038 23569 24016 23454 23747 23308 23805 23748 24055 24057 24102 24036 24145 24042 24106 24275 24064 24361 23927 24395 24139 24226 23994 24311 24051 24144 23992 24306 23812 24330 23494 24123 23801 24270 23675 24150 23527 24108 23236 23995 23296 24068 23123 23788 23185 24164 23488 24174 23391 23889 23089 23576 23014 23512 22948 23426 22926 23441 22972 23393 22920 23418 22937 23374 23004 23385 22980 23279 22989 23296 22953 23259 23143 23148 22960 23208 22939 23265 23505 23251 23111 23126 22899 23033 22816 22954 22672 23021 22657 23062 22605 22951 22793 23040 22641 23153 22801 23356 22962 23333 23052 23416 23208 23496 23265 23531 23412 23475 23261 23473 23335 23461 23267 23257 23156 23280 23220 23332 23121 23256 23056 23181 23056 23319 22998 23233 22999 23280 23140 23384 23112 23301 23114 23378 23119 23329 23224 23345 23208 23421 23289 23541 23056 23560 23093 23465 23047 23456 23078 23480 22966 23475 23046 23528 23149 23515 23088 23398 22800 23433 22876 23420 22851 23355 22816 23442 22983 23443 23083 23506 23064 23525 23245 23498 23111 23383 22935 23458 19844 21317 21095 21726 21197 21829 21376 21904 21516 29804 24332 24199 23515 23804 23288 23682 23312 23683 23367 23584 23314 23488 23305 23505 23359 23509 23376 23398 23314 23352 23338 23404 23345 23424 23302 23465 23311 23415 23296 23355 23255 23421 23309 23497 23304 23390 23312 23317 23272 23227 23229 23148 22997 22757 22813 23093 22566 22939 22505 22788 22451 22702 22447 22486 22885 23078 23111 23412 23456 23689 23488 23676 23594 24263 23319 24037 22677 23360 21975 22611 22644 22241 22345 22262 22257 22512 22750 23109 23415 23770 23977 23656 24043 23205 23430 22808 22580 22824 22102 22560 22080 22515 23120 23731 23649 24208 23206 23895 22779 23025 22837 22264 22621 22266 22667 22730 22855 22913 23216 23093 23463 23077 23489 22753 23031 22813 22843 22669 23004 22896 23271 23316 23288 23365 23169 23128 23064 22830 23058 22551 22743 22776 23055 23040 23459 23069 23429 23042 23484 22816 23328 22741 23093 22682 22873 22549 22936 22799 23323 23079 23377 23267 23377 23189 23232 23008 23057 22803 22892 22589 23138 22551 23017 22649 23065 22947 23475 23025 23606 23025 23580 22882 23429 22742 23316 22110 23154 22637 22936 22489 22976 19350 21700 21495 22265 21797 22589 22215 22622 22317 22544 23929 23409 23096 23237 22880 23661 22624 23228 22481 22963 22683 23244 23080 23674 22983 23668 22746 23481 22637 23407 23115 23067 22600 22996 22506 23235 22825 23450 23021 23359 23130 23133 22784 23127 22481 22940 22513 23061 22968 23409 23023 23579 22850 23590 22701 23445 22614 23232 22144 23111 22568 23031 22504 23407 22969 23521 23113 23341 23134 23144 22919 23123 22948 23168 22878 23187 22528 22912 22485 22881 22669 23157 22940 23228 22937 23559 22996 23501 22788 23352 22711 23090 22692 22845 22503 22994 22711 23303 23184 23431 23168 23384 23220 23136 23108 22981 22721 23056 22529 22817 22517 22730 22791 23200 23224 24013 23324 24000 23039 23808 22723 23273 23040 22392 22481 22230 22247 22612 22774 23377 23559 23747 23996 23691 23970 23233 23608 22808 22842 22776 22129 22724 21959 22392 22777 23290 23570 24116 23105 23712 22651 22873 22481 22208 22328 22916 23179 23703 24005 23376 23830 22677 23185 22048 22220 22450 22151 22617 22998 23124 23296 23234 23207 23193 23159 23063 22927 22745 22918 22604 22905 22666 22908 22890 23232 23156 23403 23063 23369 22850 23321 22777 23054 23036 22764 22564 22784 22750 23189 22983 23380 23172 23249 23225 23330 23092 22968 22737 23355 22601 22941 22573 22901 22718 22967 23026 23373 23013 23533 22793 23509 22760 23377 22650 23239 22679 23061 22725 22926 22629 22954 22632 23280 22937 23381 23191 23181 23054 23027 22843 22861 22512 22892 22629 23393 22897 23648 22775 23397 22646 23040 22631 23014 22632 23424 23160 23322 23048 23112 22585 23056 22515 22892 22511 23223 23011 23620 22829 23492 22555 23073 22453 22920 22615 23086 22615 23389 22981 23367 23098 23210 22888 23683 22551 22941 22591 23224 22736 23323 23050 23532 22712 23239 22777 22913 22435 23173 22801 23460 23094 23333 22921 23028 22781 23114 22604 23144 22454 22977 22636 23241 22995 23479 22963 23606 22729 23505 22661 23163 22692 22935 22488 23115 22930 23385 23176 23168 23062 23060 23041 23078 22613 22961 22577 22989 22886 23524 23058 23559 22732 23202 22808 22857 22512 23097 22877 23438 23329 23225 23152 23383 22488 22604 22665 23414 23350 24066 22967 23906 22595 22588 22233 22449 22776 23653 23784 23489 23754 22695 22318 22682 22028 22357 22361 23007 23458 24143 23292 23876 22572 22688 22515 22189 22543 22299 22494 23404 23597 23712 24020 23119 23461 23088 22041 22306 21971 22464 22886 23399 23593 24167 23104 23590 22567 22715 22803 22550 22817 22690 23124 11655 15970 16361 17227 16812 17339 17152 17330 17248 17651 27700 26044 25463 25110 24785 24429 24265 24002 23921 23849 23569 23783 23454 23516 23477 23796 23665 16519 18066 19071 18702 19399 19218 19216 19053 19343 19217 26709 25372 25155 24605 24746 24390 24327 24077 24000 23699 23797 23608 23779 23369 23534 23198 23693 18193 19688 19616 20297 20326 20983 20535 21140 20608 30321 25184 25070 24116 24541 23588 24175 23431 23741 23249 23526 23041 23531 23041 23480 23040 23607 23193 20877 21037 21687 21623 21692 21472 21592 21309 21672 25536 24537 23443 23971 23118 23566 22972 23457 22976 23540 23252 23731 23412 23910 23292 23986 23286 20743 21927 22771 22076 22862 22097 22672 22034 22612 22196 24136 23316 23465 22854 23314 22870 23268 22732 23206 22700 23349 22973 23566 23137 23597 23337 23702 23458 23654 23470 23597 23393 23525 23390 23335 23261 23261 23052 23572 22880 23220 22758 23223 22757 23179 22778 23108 22971 23352 23181 23691 23285 23791 23291 23751 23216 23863 23325 23808 23229 23832 23080 24007 23023 23699 22918 23190 22777 22515 22519 22375 22431 22918 22528 22928 22868 23697 23722 23958 24141 23515 23974 23151 23264 23012 22309 22866 22571 22965 22115 22624 22315 22704 22919 23076 23232 23424 23698 23795 23541 24167 23782 24316 23749 24308 23240 23801 22861 22889 23012 22727 23082 22746 23089 22765 23089 23144 23455 23299 23539 23037 23612 23015 23286 23409 22941 22970 22907 22881 22985 22873 23312 23124 23457 23301 23491 23365 23339 23255 23214 23233 23127 23013 23208 22652 23072 22677 23127 22956 23467 23165 23616 23128 23684 22912 23527 22861 23462 22816 23261 22752 23127 22698 23092 22593 23148 22753 23319 23026 23511 23150 23612 23263 23536 23221 23544 23267 23392 23161 23353 23067 23254 22906 23152 22730 23284 22792 23352 22544 23195 22533 23040 22768 23537 23004 23648 23047 23801 22812 23545 22789 23367 22791 23251 22652 23041 22692 23010 22760 23363 23077 23577 23255 23434 23123 23317 22935 22622 22599 23203 22645 23149 22711 23248 22970 23592 23080 23633 22906 23536 22842 23254 22977 22926 22585 22997 22615 23110 22883 23453 23241 23443 23310 23302 23176 23179 22943 23131 23012 23168 22791 23122 22646 23137 22536 22777 22615 22882 22944 23609 23312 24039 23369 24091 22893 23892 22817 23273 22663 22336 22517 22252 22428 22480 22497 23288 23656 23808 24064 23497 23802 23043 23518 22839 22868 23059 22148 22494 22313 22747 23209 23703 23655 24218 23738 24138 23110 23532 22681 22285 22693 22743 23049 23046 23537 23084 23553 22973 23383 22846 22952 22848 22857 22740 23168 23192 23357 23370 23197 23196 23074 22920 23012 22846 23537 22727 23060 22615 23031 22667 22996 22834 23143 23026 23351 23153 23512 23108 23636 22957 23616 22921 23360 22787 23144 22823 22998 22603 23014 22533 22997 22608 23189 22869 23397 23122 23383 23014 23540 23160 23411 23081 23218 22855 23217 22855 23580 22565 23015 22535 23073 22569 23057 22736 23172 22951 23529 23008 23543 22991 23632 22849 23616 22775 23542 22732 23498 22689 23314 22648 23191 22440 23026 22836 22996 22628 23065 22581 23057 13756 15899 16047 16966 16847 17549 17362 17960 17697 32416 27037 26125 25401 25057 24736 16333 18283 18804 18663 19145 18809 19309 19035 19366 19047 26776 25300 25012 24545 24627 15717 19901 20065 20569 20454 20938 20756 21239 20943 21733 26860 26245 25128 25606 24772 25309 21056 22494 21828 22732 22116 22757 21902 22858 21703 27456 24411 25152 24031 24802 23626 22754 22076 23059 22096 22519 22321 21822 22105 21713 22205 23208 23284 22817 23009 22717 23031 23058 23348 23181 23461 23426 23574 23478 23673 23442 23402 23337 23491 23340 23559 23536 23687 23552 23725 23575 23888 23479 23951 23416 23904 23415 23946 23287 23877 23346 23785 23298 23883 23245 23895 23316 23892 23250 23944 23228 23833 23237 23817 23182 23734 23150 23861 23082 23856 23149 23885 23159 23834 23058 23854 23008 23766 22881 23777 22904 23767 22963 23645 22976 23699 22915 23645 22900 23648 22832 23546 22904 23404 23336 23321 22790 23265 22922 23191 22869 23251 23350 23392 23000 23351 23297 23328 22882 23470 22897 23634 22864 23584 22913 23831 23093 23815 23088 23819 22964 23795 23039 23704 23097 23778 23043 23720 23268 23784 
22088 22182 23073 22144 22349 22708 22871 21741 22803 22308 22237 21972 22685 22089 22265 21871 23079 21710 21923 22432 22812 21547 22774 22144 22579 21541 22624 22384 22433 21949 23176 22249 22269 21744 22710 22375 22369 21836 23053 22008 22305 22179 22988 21722 22455 21830 23179 21591 22546 22483 22856 21664 22650 22110 22811 21686 22496 22396 22520 21629 23096 22158 22609 21660 22743 22280 22424 21878 23280 22008 22344 22222 22935 21783 22156 21913 23029 21963 22519 22349 23016 21721 22550 22266 22403 21602 22706 22410 22250 21833 23135 21945 22155 22431 22858 21379 22791 22378 21593 22040 23081 21820 21290 21902 23717 20992 21715 23418 22952 21044 22272 22489 22629 20823 22124 23620 21900 21735 23688 22665 21457 22479 22939 21889 21122 21883 23641 21350 22105 23536 22391 21297 22670 22803 21705 22333 22246 22414 21860 22417 22497 21902 22085 22822 22200 22128 22535 22688 21895 22174 22304 22594 21709 22400 22464 22156 22005 23164 21808 21595 22508 22316 21395 23040 21824 22704 22612 22555 21852 22955 21972 22458 22482 22704 21630 23203 21836 22459 22386 22856 21762 22989 22147 22423 22291 22645 2781 5389 4341 6041 6131 7470 6871 29419 27757 28034 25959 25808 24853 25120 23513 23991 23240 24277 22733 23078 22720 23211 22678 22475 22124 23014 22290 22199 21513 22281 22251 22201 21288 22203 21588 22465 21352 21751 21684 22359 21189 21671 21327 22528 21317 21506 21336 22013 21639 21424 20944 22609 21860 21044 20321 22060 22705 22260 20421 20782 21131 23179 21704 20701 21137 21889 22229 20871 20717 22430 21956 21867 20097 21205 22482 22210 21636 20414 20866 22381 21892 22080 20695 20759 21486 21959 22372 21301 20327 21159 21176 22962 22119 20731 20757 21358 22901 21521 20848 21143 21632 21840 21812 20914 21360 21147 22144 21632 21431 20970 21525 21968 21793 21228 21276 21336 22117 21717 21403 21077 21664 21677 21944 21266 21372 21152 21993 21459 22164 21417 21432 20900 21735 21888 21990 21216 21439 21257 22231 21606 21497 20933 21639 21754 21900 20914 21817 21275 22292 21252 21538 21355 22091 21592 21704 20984 21975 21276 22275 21320 21815 21606 22121 21441 21586 21122 22306 21428 22151 20939 21734 21436 22144 21607 21887 20924 22001 21363 22247 20987 21779 21514 22088 21653 21760 21156 22252 21464 22368 5197 8153 8951 11124 11597 12631 11977 13188 13467 31520 29442 28903 26305 26124 25632 25495 24192 24166 23307 24091 23175 24032 22881 22898 22345 23170 22880 23338 22312 22560 22135 23221 22037 23141 22048 22339 21588 22578 22272 22936 22180 22656 21549 22037 21628 22621 22040 22700 21830 21981 21415 21928 22020 22437 22229 22495 21748 21961 21331 21931 22084 22536 21852 22861 22030 22459 21577 21966 21258 22144 21832 22218 22121 22400 22177 22090 21064 21786 21450 22535 21624 23024 21987 23212 22245 22144 21287 21170 20692 21214 20632 21850 22677 22106 23221 22647 22831 22633 22068 22188 21041 21181 20839 20826 21167 21170 21398 22199 21522 23239 22322 23360 22353 22181 21287 21213 20471 21429 20813 21653 21959 21814 22816 22026 23174 22480 23172 22660 23318 22772 22840 22605 22343 22052 22051 21911 21885 21356 21632 21299 21836 21395 21995 21361 22100 21732 21741 21903 21967 22113 22064 22285 22119 22416 22233 22312 22060 22341 22065 22275 22183 22389 22295 22213 22284 22247 22349 22229 22364 22247 22448 22150 22360 22182 22477 22360 22365 22149 22361 22278 22478 22364 22341 22027 22372 22085 22397 22323 22416 22073 22297 9325 11895 13319 14385 15098 15838 16138 16677 16890 17237 29255 27849 26217 25708 24480 24704 23643 24107 23118 23553 22709 23363 22305 23183 22013 22932 21895 22797 21800 22557 21665 22455 21663 22338 21584 22519 21625 22386 21590 22312 21627 22311 21579 22233 21504 22429 21472 22213 21561 22311 21495 22382 21755 22456 21591 22317 21785 22345 21632 22259 21473 22103 21518 21989 21674 22205 21802 22456 21896 22593 21996 22726 21715 22656 21852 22420 21698 22595 21928 22535 21658 22612 21925 22703 21869 22800 21889 22739 21927 22790 22083 22733 22048 22650 22035 22754 22085 22945 21995 22835 21864 22844 21798 22742 21973 22855 21895 22832 21845 22823 21703 22395 21626 22455 21598 22143 21689 22122 21678 21844 21340 21960 21449 21944 21190 22023 21226 21962 21412 21890 21091 21857 21047 21954 21391 21824 21319 21878 21474 22126 21657 21532 20803 21366 21053 21495 20880 21203 20848 21297 20976 21046 20997 21086 21341 21818 21873 21884 21575 22124 21488 22267 21999 22242 21111 21930 21319 21773 21424 21661 21766 22685 21550 22430 21485 22564 21538 22815 21453 22444 21606 22001 21469 21688 21837 21423 21888 21762 22649 21901 21899 21735 14327 15555 17112 17164 17761 17952 18548 18553 19109 27298 26176 24818 24645 23698 23796 23088 23290 22528 22836 22318 22528 21956 22378 21966 22336 21795 22285 21891 22243 21958 22328 21864 22219 21719 22054 21719 22032 21743 22264 21749 22073 21696 22137 21457 22180 21612 22107 21699 22232 21879 22368 22056 22704 22190 22947 22178 23018 22081 22920 21952 22861 21862 22843 21824 22668 21701 22504 21790 22329 21630 22288 21632 22220 21376 22199 21512 22728 21965 22824 22327 22733 22253 22640 22257 22493 22103 22437 21764 22326 21415 22092 21507 22136 21634 22725 22106 23056 21941 23032 21865 23088 21637 22432 21536 22279 21348 22311 21751 22752 22163 22857 22425 22882 22333 22613 22362 22337 22033 22829 21556 22176 21252 22325 21824 22889 21952 23123 21846 22934 21672 22328 21488 22069 21468 22359 21779 22733 22142 22717 22301 22579 22256 22404 21737 22300 21691 22197 21493 22040 21753 22532 22145 22861 22159 22920 21897 22817 21794 22410 21564 22039 21715 22094 21468 22231 21816 22436 22265 22727 22321 22717 22345 22393 22348 22320 21881 22166 21419 22352 21532 21828 21395 21588 21625 22475 22500 23212 22629 23584 22343 23393 18220 20295 19051 20691 19300 19782 19707 19383 19440 19856 23759 24048 23115 23225 23112 23542 23584 23398 23905 22761 23172 22360 21527 21661 20928 21361 21351 22208 22626 22479 22709 23603 22498 23748 21965 22890 21252 21853 21536 21147 21224 21824 22065 22798 23392 22672 23241 22128 22327 22076 21976 21709 21963 21696 22284 22075 22582 22448 22569 22619 22489 22576 22133 22069 22313 21779 22064 21753 22016 22037 22135 21987 22273 22273 22718 22297 22732 22020 22811 22042 22776 21809 22388 21840 22319 21716 22016 21559 22156 21994 22576 22334 22635 22443 22343 22272 22312 21844 22380 21504 22368 21606 22121 21706 22304 22034 22775 22098 22944 22052 22969 21815 22704 22112 22245 21541 22123 21426 22351 21783 22531 22055 22819 22358 22684 22245 22601 21998 22466 21628 22391 21401 22179 21452 22102 21531 22419 22033 22905 22037 23090 22058 23059 21656 22564 21776 22090 21565 22379 21668 22708 22237 22771 22139 22566 21828 22621 21491 22241 21467 22356 21992 22675 22121 22957 21955 22937 21675 22515 21792 22027 21531 22171 21569 22491 21504 22826 22196 22896 22180 22682 22116 22544 21690 22391 21424 22315 21504 22234 21640 22519 21911 22820 22144 23142 21958 22848 21744 22438 21812 22120 21573 22163 21572 22208 21730 22528 22208 22764 22477 22654 22293 22317 22220 22284 21760 22423 21371 22032 21693 21998 21703 22436 22016 22631 22113 22981 22191 23046 22214 23072 21910 22468 21642 21703 21167 21748 21034 22024 22139 22999 23268 22557 22649 22342 21120 21545 20882 21992 22327 23380 22616 23513 21569 21615 21162 21154 21255 22187 23043 22971 23369 22704 23008 21808 21210 21486 20832 21891 22459 23414 22653 23623 21763 23345 21692 21941 21544 21105 21075 21432 21984 22890 23349 22712 23270 21862 22750 21979 22022 21677 22290 22231 22688 22615 22397 22154 22031 21850 22029 21722 22151 22167 22343 22280 22640 22297 22855 22103 22565 22004 22221 21898 21940 21732 22375 21784 22336 22343 22738 22480 22500 22267 22854 21703 22183 21640 22155 21907 22311 22159 22821 22135 22928 21824 22272 21840 22151 21495 22514 22304 22798 22441 22528 22256 22021 21555 22150 21814 22544 22245 22995 21857 22631 21692 22163 21577 22343 21724 22712 22359 22648 22139 22427 21554 22294 21536 22408 22032 23152 22045 23100 21828 22757 21792 22300 21532 22216 21616 22679 22358 22656 22416 22680 22116 22509 21740 22439 21309 22184 21761 22608 22063 23159 21864 23117 21664 22602 21867 22263 21366 22275 21894 22664 22227 22864 22421 22487 22215 22948 2019 6612 8115 10490 10971 12949 12711 14365 13483 15012 33656 32045 29418 28576 26944 26956 25715 26217 25053 25457 24759 24684 24225 24135 23803 23873 23192 8402 9977 12545 13509 15251 15482 16815 16313 17521 33703 32363 29561 28672 27009 26584 25342 25384 24503 24838 24228 24455 23757 24346 23800 24294 23582 23924 12666 14510 15890 16640 17093 17757 17313 18088 17829 30725 28212 26953 25544 25344 24550 24880 24891 25472 24486 25325 23786 24899 23252 24820 23053 24275 14135 16295 16764 17232 17548 18088 18788 19935 19965 20802 29143 27499 26936 25814 25717 24796 25102 23885 24651 23188 23466 22592 22762 22934 21949 22744 22175 18119 18251 19105 19697 20046 20884 21073 21450 21284 21755 25434 24850 24244 23981 23715 23670 23503 23275 23309 23016 23172 22824 22668 23155 22504 22805 22369 22663 22208 22576 22122 22465 22181 22576 22315 22753 22401 23125 22668 23344 22676 23204 22475 23130 22199 23147 22272 22905 22049 22823 22144 22407 21971 22360 21941 22455 21927 22300 21826 22489 21697 22515 21892 22612 22323 22911 22536 22977 22650 22850 22618 22700 22276 22593 22196 22691 21788 22788 21658 22400 21710 22503 22009 23040 22314 23298 22281 23176 22237 23248 22131 23119 21927 22788 21802 22723 21893 22389 21877 22601 21757 22315 21707 22331 21590 22549 21992 22913 22339 22864 22531 22785 22496 22839 22341 22805 21905 22849 21461 22480 21639 22583 22027 23000 22336 23329 22122 23281 22016 23043 21804 22659 22053 22445 21877 22313 21721 22310 21740 22578 21926 22665 22439 22980 22549 22728 22390 22395 22074 22960 21722 22404 21534 22165 21686 22566 22018 22581 22118 22689 22240 23314 22459 23681 22184 23370 21897 22659 21925 22070 21697 21368 21245 21366 21400 21213 21098 21228 21133 21444 21606 22183 22245 22845 23124 23263 23130 23099 23376 22824 23491 22230 22625 22136 21511 21723 20956 21382 21223 21947 22392 23216 22510 22847 22886 23687 22567 22753 22403 22209 22252 21819 22147 21697 22230 22048 22511 22356 23020 22474 22760 22369 22621 22208 22361 22144 21971 21761 22012 21880 22509 22453 22797 22650 22642 22443 22449 22223 22377 22090 22400 21594 22023 21767 22213 22133 22704 22241 22624 22160 22974 22284 23091 22118 23181 21895 22947 21757 22582 21815 22168 21619 22172 21561 22515 21797 22672 22173 22912 22339 22787 22328 22637 22194 22481 21831 22531 21486 22114 21683 22589 21852 22579 22145 23076 22129 23208 21958 23072 21815 22739 21798 22358 21473 22208 21540 22536 22200 22904 22427 22578 22285 22343 21797 22397 21479 22245 21589 22588 22052 23106 22064 23166 21805 22638 21687 22294 21537 22456 21811 22695 22358 22993 22328 22737 22361 22727 22455 22673 22345 22481 22279 22360 21932 22508 21625 22251 21557 22236 21713 22198 21905 22583 22137 22960 22122 23060 22342 23361 22303 23596 21939 23315 21716 22498 21825 22157 21483 21386 21113 21110 21224 21973 22081 22586 22385 23014 23368 23001 23434 22869 23480 22266 23148 22009 22340 21893 21585 21871 20953 21282 20925 21410 21244 21733 21367 21549 21617 22096 22343 22464 22588 22471 22743 22528 22560 22499 22333 22582 5005 8119 10034 11368 12284 12937 13573 13744 14327 35264 32943 30395 29021 27489 27008 10501 13238 14539 16251 16352 17628 17341 18439 17878 35801 32760 31448 28720 28545 26594 14174 15221 17187 17377 18645 18333 19351 18944 19653 19168 31193 28592 27848 26217 26192 16690 18102 18119 19529 19261 20316 19704 20738 20091 21034 28474 27560 25824 25914 24779 25104 20192 21575 21125 22044 21619 22512 21970 22480 21844 26700 25440 25271 24560 24605 23981 24082 23682 23748 23527 23623 23185 23527 22843 23401 22701 23437 22811 23181 22621 23215 22336 23021 22247 23069 22153 22837 22049 22723 22050 22678 22062 22612 22131 22547 22027 22548 22100 22517 22112 22592 21915 22474 21884 22331 21916 22563 21897 22451 21939 22235 21864 22097 21660 21723 21345 21621 21363 21760 21360 21849 21588 21848 21879 22232 21857 22056 21737 21895 21938 21927 22011 22392 22172 22405 22300 22819 22777 23207 22917 23696 23092 23749 23059 23964 22971 24064 22807 23068 22620 22766 22775 22647 22763 22506 22669 22323 22583 22358 22135 21955 22039 21894 22130 21946 22197 21873 22082 21801 22264 21804 22400 21872 22242 21789 
