# Supplementary material for: An Active Feature Selection Strategy for DWT in Artificial Taste
Source: Hindawi journal article supplement (doi:10.1155/2018/9709505), 2018-01-01
Supplement: f1 [file 9709505.f1.zip › blackTea-med-2.txt]

43448 43484 43465 43473 55 12521 18698 20301 22509 21819 21655 21543 22448 23424 23248 21907 21923 22294 23956 22455 22201 22477 22960 23585 22501 22148 23537 23168 23350 22105 22711 23428 23340 23223 22007 22434 24129 23254 22289 22309 22830 23950 23000 22256 22811 23044 23269 22904 22598 23447 23184 22893 22704 23008 23216 22950 22828 23406 22985 22856 22828 23130 23143 23015 23063 23591 23048 22927 22560 23176 23208 22916 22670 23624 22985 23015 22490 23235 23170 23256 22342 23313 22840 23424 22392 23114 23047 23476 22389 23338 22725 23360 22306 23277 22961 23399 22352 23544 22830 23249 22421 23228 23072 23232 22577 23613 22809 23073 22481 23418 22873 23128 22465 23777 22750 22973 22487 23287 22950 23097 22705 23622 22948 23044 22513 23267 22993 23112 22487 23658 22861 23264 22454 23594 23046 23464 22292 23319 22831 23106 22457 23216 23144 23141 22656 23376 22968 23118 22428 23040 23188 22989 22450 23517 22951 22832 22807 23289 22766 22862 22704 23936 22704 23027 23802 23279 22304 23504 23540 22680 21948 22772 23872 22286 22371 24199 23099 22305 23306 23869 22116 23269 23425 22683 9754 16283 18983 18619 18602 20049 20125 19070 19930 20480 29724 26094 25196 24142 24078 23698 23746 23253 23664 23498 23179 23370 23228 22968 23552 23085 23083 23010 23552 22743 23377 22969 23136 23153 23018 22948 23493 22528 23428 23060 23099 22948 23548 22480 23494 23081 23091 22957 23512 22387 23779 22820 23104 22965 23482 22504 23820 22778 23180 23108 23476 22404 23758 22805 23148 23072 23385 22237 23643 22477 23223 22966 23237 22634 23796 22424 23255 22971 23040 22647 23624 22414 23283 22903 23040 22652 23700 22446 23268 22896 23076 22653 23481 22456 23342 22621 23172 22984 22962 22889 23429 22457 23321 22964 22880 22895 23442 22381 23529 22955 23213 23183 23200 22711 23642 22451 23168 22455 22896 23121 22493 23197 23654 22149 23779 23356 22388 23736 23321 22412 24225 22244 23020 23983 22230 22535 24082 21934 23018 23045 22202 22896 22776 22272 23414 22072 23648 23399 22413 23906 23065 23049 23303 23133 22806 23576 22646 23023 23076 22736 22759 23177 22833 23349 22578 23431 22897 23078 23241 23237 22947 23658 22540 23015 22848 23260 22958 22996 23032 23275 22606 23730 22482 23329 22506 23260 22937 23427 22998 23040 22708 23065 16992 20139 19708 21528 20700 21285 21409 21697 21174 33169 25595 24940 23654 24083 23395 23531 23298 23783 22778 23952 22708 23408 23131 23155 22945 23069 22982 23514 22517 23800 22728 22755 23058 23059 22736 23472 22503 23520 22417 23670 22892 23136 23211 23215 22657 23234 22780 23389 22441 23511 22828 23648 23128 22961 22896 23095 22952 23447 22548 23761 22412 23009 22184 23365 23120 22562 23938 22508 22548 23271 22592 23656 22177 24204 22288 22743 23386 22303 23464 22531 24024 22638 22534 23485 22210 23536 22143 24055 22287 22662 22969 22945 23304 22628 23676 22577 23190 22701 23291 22898 22880 23296 22906 22888 22808 23130 23161 22639 23332 22715 23405 22704 23671 22496 23146 22544 23544 22547 23210 22723 23394 22808 23272 23049 23029 22880 22917 23056 23119 22530 23281 22680 23570 22432 23732 22304 23539 22304 23693 22496 23312 22563 23327 22810 23176 22759 23200 22908 23085 22967 23101 22665 23035 23010 22924 22604 23107 23034 23201 22581 23240 22824 23289 22570 23596 22368 23464 22259 23736 22544 23103 22773 23162 23016 23217 23066 22853 22883 22935 23152 22859 22780 22860 23056 23213 22594 23368 22755 23304 22556 23616 16122 20544 20164 22565 20864 21712 21499 22161 22373 21656 27106 23367 24148 22759 24105 22837 22880 22997 23185 23723 22548 23508 22545 23745 22440 24231 21970 23101 22620 23086 23367 22855 23616 22656 23430 22818 23512 22664 23354 22697 23495 22635 23242 22487 23576 22610 23158 22704 23499 22855 23060 22992 23187 22910 23193 23138 23048 22851 23058 23143 22919 22856 23032 23136 22889 22716 23194 23027 23072 22688 23081 22967 23099 22595 22983 22917 23198 22608 23249 22833 23232 22616 23329 22990 23092 22612 22957 23001 23044 22609 23123 22992 23187 22744 23157 23004 23084 22585 23174 22901 23300 22369 23276 22768 23270 22616 23237 22816 22992 22785 22896 23146 22928 22870 22933 23170 22870 22776 22839 23237 22860 22929 22899 23280 22914 23083 22700 23661 22425 23271 22582 23801 22189 23300 22157 24034 22263 23344 22716 23623 22539 23360 22771 23479 22656 23141 22912 23065 22864 22978 22643 22841 23157 22926 22659 22951 22966 23042 22695 22861 22988 23084 22823 22716 23248 22828 23084 22867 23223 22812 23031 23013 23089 22906 22929 23266 22987 23022 22871 22984 22593 23369 22697 23111 22508 23453 22573 23180 22376 23663 22325 23436 20292 22493 21408 22660 21889 22989 21848 22901 22188 27321 23677 23799 22831 23507 22953 23376 22760 23392 22739 23325 22548 23200 22936 23150 22684 23172 23088 23105 22872 23000 23092 23159 22592 23271 22407 23687 22392 23436 22506 23586 22581 23444 22619 23265 22803 23208 22558 23040 23113 22893 22829 22880 23288 22938 22948 23042 23024 23265 22797 23148 22322 23500 22547 23113 22117 24103 22104 23576 22585 23606 23273 22424 22986 22366 23578 22684 23293 22592 21980 24103 21771 23570 22592 23640 22618 23416 22551 22528 23696 22177 23282 22264 24068 22326 23317 22721 23077 23092 22914 22832 22821 23265 22743 23068 22813 23127 22999 22930 22967 22453 23515 22441 23366 22589 23389 22772 23210 22600 22956 23116 22766 22784 23001 23093 23312 22792 23159 22500 23601 22381 23392 22381 23566 22528 23492 22468 22980 22887 23086 22629 23016 22967 23044 22856 23153 22597 23445 22552 23268 22321 23723 22249 23568 22422 23068 22968 22955 22983 23296 22848 23306 22465 23211 22204 23629 22421 23567 22512 23203 22944 22912 22900 22844 22700 23503 22321 23305 22496 23476 22561 23351 22641 22823 23068 23163 22684 23223 22442 23572 22441 23296 20850 22217 22828 22408 22784 22759 22565 23558 21700 23360 23062 23349 23544 22294 23351 22583 23308 23289 22561 23160 22159 24121 22329 23177 22848 22230 23797 22926 22603 22902 21975 24151 22277 23255 22620 22151 24049 22510 23238 22670 22888 23043 23261 22593 23210 22712 23287 22991 22868 22934 22823 23107 23121 22683 23159 22362 23593 22756 22963 22807 23049 23026 23287 22402 23461 22674 23360 22778 23070 22846 23054 22612 23644 22285 23352 22561 22941 23050 23076 22817 23099 22273 23718 22375 23428 22445 22969 22982 23284 22600 23240 22405 23513 22645 23036 22688 22992 22804 23351 22392 23528 22342 23337 22944 22955 22784 23168 22216 23668 22400 23301 22490 22967 22928 23045 22715 23185 22296 23673 22573 23237 22588 22927 23008 23281 22622 23104 22373 23553 22584 23155 22695 23127 22749 23510 22374 23343 22518 22990 23040 22793 22909 23120 22537 23483 22586 23204 22766 22724 23083 23213 22324 23284 22314 23522 23323 22129 23375 22688 22263 24144 22048 23179 22490 22237 23927 22659 22628 22948 22112 23776 23297 22300 23512 22593 22166 24128 22030 23224 22585 22100 23865 22808 22789 22826 22796 23173 23418 22520 23398 22747 22880 23186 22701 22947 23073 22634 23171 22982 22823 22957 22824 22648 23573 22605 23168 22662 22849 22902 23347 22400 23353 22701 23001 23138 22912 22788 23164 22209 23523 22828 22892 22838 23073 22377 23667 22404 23332 22570 23056 22728 23604 22265 23460 22476 23011 22818 23490 22268 23402 22433 22885 22949 23111 22480 23309 22372 23296 22971 22968 22667 23203 22345 23288 23022 22931 22663 23255 22358 23352 22898 22906 22811 23058 22336 23482 22828 23025 22745 23296 21883 22966 23023 23272 22318 23381 22421 23003 23104 22993 22640 23345 22565 23197 23069 22884 22636 23256 22496 23107 23088 22902 22930 22994 22454 23385 22972 22878 22924 23067 22110 23864 22886 22447 23209 22391 22131 24196 22348 22833 23309 22538 21956 23954 22880 22103 23446 22656 22053 24068 22923 22276 23413 22055 22149 24056 22772 22156 23372 22640 22004 23985 23172 21953 23543 22684 22738 23150 23052 22454 23420 22657 22694 23084 23430 22478 23024 22825 23070 22599 23524 22656 22880 22928 23056 22488 23482 22977 22800 22959 22962 22415 23451 22858 22848 22647 23277 22457 23082 22980 23245 22465 23368 22503 23001 22860 23488 22217 23381 22496 23125 22661 23648 22720 22993 22754 23279 22279 23463 22903 22853 22770 23168 22562 23150 22976 23056 22551 23476 22487 23008 22754 23578 22208 23386 22616 23064 22459 23623 22541 14733 17898 19150 18870 20498 19697 20141 20071 20573 39969 28435 25212 24432 23603 24171 22857 23456 23376 23911 22820 23476 23001 23048 22562 23795 23204 22988 17671 20200 20473 21116 21442 21682 21097 22037 21443 32748 25409 25024 24152 23624 23104 23779 23034 22784 23063 24442 23500 22464 23088 23404 22482 22612 11484 20248 20071 22254 21392 21392 21443 23344 22137 21364 28226 24719 23404 23063 24406 23681 22117 23334 23536 22960 22454 23307 24171 23070 22161 23576 23241 17537 21453 22208 22429 21883 22400 22387 22581 22304 22401 25493 24115 23107 23351 23284 23205 22771 23228 23340 23271 22473 23422 22934 23096 22491 23510 23157 21225 22024 23030 22261 22625 22261 23341 22674 22601 22436 24264 22960 23410 22503 23690 23085 23158 22582 23591 22813 23123 22471 23765 22929 23184 22413 23576 22592 23393 22307 23528 23151 23495 22314 23363 22849 23160 22412 23268 22980 23701 22568 23033 22706 23339 22457 23014 22538 23720 22824 22984 22519 23467 22662 23372 22355 23168 23089 23410 22298 23181 22853 23271 22293 23034 22708 23629 22559 23011 22592 23468 22552 22956 22692 23581 22737 22919 22615 23424 22665 22940 22639 23580 22756 22745 22491 23454 22676 23158 22453 23616 23092 23104 22472 23371 22817 23034 22464 23089 23164 23338 22286 22862 22953 23062 22560 22464 23338 23922 22276 22091 23117 23354 22192 22294 22720 24044 23488 22300 22273 23652 22638 22395 22193 23960 23609 22425 21808 23479 22819 22651 21945 23553 23895 22647 21893 23452 23160 22593 22144 22725 23840 23897 22773 21987 22965 23169 22932 22557 23051 23152 23376 22393 23061 22984 23050 22588 22849 23140 23303 22704 22768 22864 23102 22590 22752 22901 23481 22641 22722 22917 23184 22770 22921 22948 23528 22639 22860 22679 23348 22637 22871 22575 23527 22854 22967 22567 23400 22412 23158 22345 23205 23050 23280 22364 23198 22736 23174 22408 23032 22976 23607 22263 23026 22835 23195 22635 22807 22721 23655 22724 22992 22532 23436 22449 23227 22210 23348 22919 23580 22418 22992 22685 23341 22774 22936 22698 23750 22563 22967 22606 23430 22435 23095 22479 23536 22981 23193 22252 23472 22554 23168 22192 23396 22919 23272 22186 23112 22747 23170 22420 22885 22788 23698 22544 22951 22616 23417 22529 23106 22194 23335 23001 23337 22668 22848 22624 23346 22543 23052 22392 23435 22997 23127 22311 23284 22832 23105 22732 22809 22727 23529 22899 22784 22601 23385 22601 23207 22337 22988 22991 23446 22449 22906 22810 23242 22628 22784 22319 23631 23299 22798 22145 23288 23111 22789 22242 22665 23776 23924 22352 22224 23293 23189 22435 22345 23083 24327 23812 22663 21788 23175 23213 22552 22295 22349 23474 23917 22466 21948 22999 23261 22445 22307 22256 23528 23964 22956 21827 22555 23405 22888 22458 22150 23143 24115 23227 22359 22632 22924 23213 22625 22809 22550 23394 23078 23281 22386 22944 23002 23146 22681 22848 22575 23315 23160 23084 22424 22845 22982 23191 22602 22836 22561 23376 23056 23207 22455 22999 22860 23173 22609 22810 22765 23514 22899 22913 22455 23200 22912 23042 22754 22878 22533 23612 22760 22945 22474 6663 16760 19309 18858 20063 20121 20538 19763 20419 20336 31668 25708 24586 23371 24071 23638 18721 19910 21143 21133 22060 21205 21893 21179 22292 33053 26201 23915 24045 23469 23856 17673 21132 21161 22042 22099 22784 21700 22355 22028 22836 25258 24479 23094 23657 23261 18302 21434 22348 21800 22529 22140 23074 22141 22657 22060 25488 23862 24096 23286 23343 22528 22272 22314 23120 22327 22717 22073 23026 22720 23488 24793 23454 22833 23468 23069 23501 22801 23381 22509 23346 23264 23567 22628 22935 22866 23483 22713 23366 22475 22926 22853 23575 23100 23124 22364 23284 22966 23178 22731 22953 22560 23434 23125 23634 22906 22813 22641 23390 22937 22984 22385 22477 23289 24058 23145 22324 22173 23185 23451 23046 22424 22289 22169 23496 23907 23760 22374 22029 22641 23672 22763 22606 22344 22105 23040 24112 23508 22330 21924 22944 23421 22922 22496 22272 22027 23322 24040 23355 22389 22009 22859 23622 22672 22666 22393 22928 23462 23147 23108 22350 23120 22977 23031 22516 22820 22738 23440 23113 22900 22514 23001 23006 23017 22694 22937 22544 23425 23125 23211 22283 23034 22867 23258 22664 
22381 21830 22251 21712 22072 21408 22023 21811 22434 22008 22663 22212 22631 21767 22083 21380 21932 21600 22595 21609 22150 21837 22308 21996 22466 22150 22453 21869 22016 21202 21431 20714 21045 20662 20999 20992 21583 21552 21559 22528 21379 22007 21698 22275 21776 21831 21249 22744 21755 21921 21491 22339 21822 22019 21345 22750 21717 21921 21447 22376 21656 21904 21173 22621 21891 21796 21613 22242 21895 21890 21664 22632 21628 21972 21717 22089 22095 21997 21494 22451 21872 22135 21399 22030 22195 22103 21011 22529 22241 21747 20880 21906 22820 21825 20987 22759 22433 21435 21001 22054 22442 21203 21347 23042 22321 21216 22049 22427 22138 21031 21399 23147 22083 21228 21717 22291 22361 21142 21551 22894 22316 21463 22215 21976 22470 21543 22083 22354 22253 21509 21956 21829 22557 21985 21832 21862 22147 21913 21915 21912 22449 21578 22108 22123 22400 21682 21843 21635 22573 21776 22164 22070 22492 21340 22421 21889 22190 21449 22327 22215 22187 21456 22583 21812 22212 21834 22572 21582 22169 21524 22779 21485 22197 22105 22467 21285 22445 21860 22241 21633 22513 21470 22041 21563 57 4744 8039 9161 10693 10409 11843 11815 12586 12087 33627 29013 26769 25059 25076 23136 23680 22979 22999 22156 23222 21824 22651 22162 22379 21904 22888 21736 22292 22290 22080 21763 22752 21490 22391 21816 22137 21830 22168 21783 22570 21717 22166 21968 22216 21854 22442 21272 22167 22172 21486 22321 22695 20865 23112 22269 21360 22586 22634 21011 22900 22306 21239 22347 22710 20992 23168 21780 21656 23113 21744 21516 23351 21328 21888 22952 21613 21604 23284 21516 21607 22812 21749 21992 22203 22025 22101 22583 21692 22026 22351 21760 21816 22481 21637 22024 21991 21977 21943 22057 21704 22436 21665 22077 21911 22010 21884 22439 21535 22441 21930 21974 22149 22304 21484 22712 21457 22192 21969 22041 21664 22159 21484 22599 21318 22378 21779 22130 21803 22549 21562 22807 21721 22295 22080 22320 21701 22807 21386 22295 22021 22167 21513 22670 21297 22552 21432 22429 21867 22032 21879 22441 21509 22599 21635 22428 22051 22292 21927 22709 21344 22342 21677 22156 21778 21959 21920 22535 21449 22688 21732 22197 22137 21960 21649 22128 21696 22528 21345 22607 21767 22032 22101 22016 21705 22181 21702 22368 21581 23073 21107 537 7870 11776 13621 13340 15396 15784 14657 17218 15920 34571 30402 25797 24852 23813 22785 23533 21798 23142 22900 21800 23398 21713 21730 23249 21399 22112 22256 21955 22584 21651 22674 22074 21910 22377 21792 21935 22501 21838 22224 21709 22358 22158 22073 22401 22048 21763 22480 21616 22440 21527 22647 21800 22042 22157 21977 21838 22135 21792 22440 21456 22801 21429 22461 21553 22310 21983 22002 22089 22299 21493 22420 21577 22604 21271 22777 21659 22325 21895 22197 21976 21995 22080 22379 21493 22772 21438 22571 21411 22792 21496 22291 21447 22440 22017 22237 22093 22055 21507 22310 21896 22439 21439 22775 21404 22552 21295 22721 21649 22191 21783 22240 21884 22144 22093 22062 21976 22060 22135 21866 21584 22074 21990 22391 21814 22710 21548 22575 21213 23214 21016 22125 21408 22466 21976 21936 22487 21532 22517 21441 23081 21253 21906 21553 22320 22064 21467 22029 21899 22433 21593 22793 21097 22583 21226 23232 20935 21954 21813 22263 21932 21710 21937 22263 22144 21984 22347 21660 22280 21518 22536 21761 21979 21909 22196 21902 22202 22080 21969 22112 21934 22217 21895 21799 21965 22032 22208 21684 22215 21776 22374 21581 10735 13578 16436 16238 18267 17204 18386 17837 18919 18485 29143 25804 24395 23292 22917 22766 22528 21865 22482 21857 22463 21668 22641 21564 22720 21569 22766 21429 22354 21516 22496 21953 22389 21778 22432 21921 22472 21856 22424 21824 22192 22093 22164 21856 21981 22244 21930 21841 22001 22055 22273 21686 22348 21844 22417 21587 22619 21504 22391 21645 22729 21408 22453 21494 22876 21201 22576 21520 22999 21110 22736 21000 23397 20938 22640 20992 23287 21085 22019 21013 23190 21111 22301 21044 23307 20928 22493 21110 23383 20822 22297 21191 22365 21813 21836 21856 22272 21882 21920 21770 22333 21890 21944 21862 22156 22072 21813 21808 22329 21852 21880 21985 22129 21871 22037 21897 22281 21940 21954 21930 22042 22162 21947 22144 22030 22087 21904 22277 22080 22116 21897 22328 22000 22129 21719 22333 21852 22384 21877 22466 21885 22497 21870 22346 21808 22592 21671 22297 21600 22766 21450 22242 21595 22621 21524 22205 21481 22529 21413 22402 21243 22813 21359 22481 21254 22949 21420 22545 21501 22552 21762 22516 21475 22421 21737 22455 21616 22247 22081 22123 21852 22016 22144 22038 21725 21852 22210 21960 21897 21936 22265 10739 16540 17955 19765 19835 19523 19653 19708 20821 19719 28256 24444 24423 22101 22480 21560 23299 21217 22192 21287 23432 20939 22571 21056 23278 20977 22736 21276 22684 21973 22086 22608 21820 22532 21608 22210 21576 22583 21904 22304 21803 22020 22145 22044 21799 21973 22199 21934 21845 21894 22214 21888 21989 22300 22016 22187 21904 22295 21475 22580 21409 22263 21411 22640 21483 22528 21559 22723 21744 22432 21461 22105 22093 22016 21883 22517 21799 22576 21442 22403 21545 22662 21517 22528 21495 22464 21671 22293 21514 21879 22048 21964 21873 22270 21925 22421 21498 22401 21355 22932 21251 22520 21393 22784 21400 22487 21748 22363 21937 22098 21846 22103 21960 22259 21777 22104 21561 22557 21510 22391 21406 22684 21493 22423 21518 21964 22221 22080 21865 21632 22596 21470 22128 21952 21708 22816 21280 22615 20992 23262 21013 22615 21433 22304 22022 21659 21706 21239 22940 20977 22324 21604 22139 22695 20951 22208 21091 23127 21539 21908 21949 21639 22631 21463 22367 21622 22248 21959 21997 21888 21684 22288 22258 21809 22023 21600 22540 21605 22343 21805 22187 22042 21850 22132 22113 21537 22717 21355 22528 21664 22383 22027 18427 19789 20741 20913 21349 20917 21315 20549 21792 26275 24342 22429 22377 22322 22365 21837 22368 21545 22768 21356 22499 21916 22549 21957 21989 21797 22363 21461 22828 21408 22505 21541 22444 21959 22003 21815 22165 21760 22382 21558 22615 21466 22184 22065 22087 21861 22336 21255 22802 21379 22578 21145 22212 22153 21879 21921 22144 21618 22647 21490 22481 21613 21909 22157 22149 21818 22202 21431 22690 21489 22331 21832 21879 21893 22530 21399 22475 21547 22125 22439 21454 22135 21536 21907 22732 20918 22597 21301 21722 22897 21201 22272 21697 21154 23353 20848 22499 21530 21367 22940 21431 21869 22072 21347 22324 22608 21271 22420 21469 21696 22165 21818 22050 22216 21871 22464 21547 22358 21091 21988 22372 21700 22176 22112 21681 22490 21472 22432 21885 22086 22263 21948 21788 22161 21516 22416 21931 22080 21840 21907 22067 22317 21464 22404 21635 22274 22102 21934 21905 22197 21464 22665 21319 22637 21526 21928 22045 22421 21492 22478 21467 22515 21840 22200 21833 22293 21757 22588 21324 22492 21543 22044 21936 22237 21411 22386 21353 22631 21954 22064 21773 22319 21655 22680 21391 22408 21654 22081 22072 22187 21464 22508 21221 22528 21937 22016 21850 22233 21328 22673 21657 22158 21804 22117 21664 22592 21456 22381 21504 21915 22152 22134 21649 22260 21534 22480 21866 21849 21807 22117 21262 22560 22035 21998 21911 21984 21451 23015 20992 22408 21649 21111 22567 22434 21124 22567 21367 21072 22766 22208 21303 22456 21382 21504 23046 21413 21803 22020 21040 22318 22770 21143 22169 22065 21077 22517 22784 21025 22162 21750 21767 22059 22480 21476 22279 21765 21854 22152 22359 21785 21953 21978 21939 21574 22481 21583 22182 21856 22087 21872 22481 21437 22375 21662 21911 22062 22595 21607 22196 21670 22016 21899 22556 21413 22321 21584 22030 22139 22275 21481 22331 21574 22060 22108 22185 21600 22516 21536 22281 22022 22119 21351 22567 21559 22115 22026 22260 21548 22308 21279 22089 22170 22124 21545 22474 21398 22201 21916 22477 21391 22394 21394 21989 22021 22296 21589 22387 21675 22173 22053 22400 21309 22513 21549 22049 21832 22744 21356 22336 21808 22039 21542 22699 21641 22053 21827 22205 21462 22663 21667 21922 21971 22085 21266 22600 22094 21937 21653 22263 21752 21961 22279 22311 21408 22488 21639 21472 21941 22955 20918 22355 21888 21778 20947 23031 22083 20983 22272 21676 20848 22371 22604 21049 21880 21997 21132 21976 22932 22261 20861 22605 21485 21223 22147 22946 20965 22100 22028 21474 21527 4583 8765 10473 12129 12423 13162 13873 14141 13847 39821 31448 27720 25971 25024 23482 23414 22968 22731 22141 22838 22538 22227 21908 22653 21763 22008 61 9479 12409 14956 15543 16578 16269 17835 17146 17336 35193 29727 26158 24792 23832 23993 22633 22763 22478 22775 21760 22381 22287 22868 21549 22642 21896 7013 12794 16915 17077 18036 18447 19218 18473 19229 19358 31652 26057 25246 23535 23573 22237 23384 22437 22630 21742 22771 21849 22391 21664 22980 21912 22130 13074 17385 18213 19489 19600 20871 19894 20390 20067 20836 26675 24619 23382 23717 22263 22567 22140 22517 21807 22223 22315 22730 21685 22397 21985 22258 21442 18664 20185 20865 20415 21435 20954 21689 20576 21817 27029 24576 22347 22920 22304 22464 21625 22193 22758 22671 21271 22366 22248 21883 21047 22050 23040 22393 20876 21889 22459 22029 21329 21248 22493 23300 21684 21127 22241 22297 21639 21541 21394 23225 22903 21479 21105 22649 21952 21846 20961 22332 23152 22874 21110 21495 22502 21882 21905 21481 22424 22301 22181 21429 22077 22153 22033 21637 21961 22251 22543 21900 21821 22077 22283 21679 21696 22131 22563 21709 22023 21847 22228 21707 22034 22076 22659 21944 21920 21734 22360 21632 21859 21632 22745 21753 21992 21572 22402 21686 22257 21424 22375 22196 22496 21324 22284 21831 22262 21356 22283 22186 22512 21358 22285 21872 22262 21553 22083 21728 22765 21660 21998 21872 22279 21087 21865 21666 22636 21840 22006 21728 22576 21521 22045 21497 22784 21799 22179 21398 22528 21632 22191 21285 22088 22016 22621 21471 22045 21969 22329 21564 21904 21847 22677 21430 22129 21657 22400 21378 21959 21467 22663 21794 22039 21539 22568 21667 22011 21536 22743 21953 21877 21737 22405 21584 21997 21425 22541 22089 22055 21396 22375 21669 22568 21334 22319 22110 22301 21524 22113 21896 22064 21476 22027 22122 22514 21479 21787 21816 22391 21955 21353 21760 23254 22157 21335 21452 22683 21818 21815 20740 22574 22949 21929 20854 22049 22392 21933 21410 21325 21320 23176 22729 21386 21205 22641 21715 21638 21080 22798 22913 21840 20905 22468 22246 21682 21086 21381 22887 22872 21042 21384 22442 21687 21616 21452 22361 22213 22345 21517 22147 21900 22104 21694 21871 22085 22524 21885 21682 22029 22177 21732 22005 21523 21821 22165 22361 21806 21756 21925 22267 21557 22036 21578 22599 22072 22106 21381 22114 21954 22049 21686 21808 21870 22679 21750 21914 21657 22444 21749 22038 21376 22322 22037 22528 21351 22032 21844 22256 21082 21861 21644 22689 21933 22044 21369 22360 21636 21705 21225 22345 21979 22480 21210 22197 21781 22245 21575 21882 21489 22586 22002 22032 21445 22411 21728 22085 21421 22155 22081 22573 21344 22177 21713 22448 21412 22080 21372 22592 21955 22264 21197 22340 21667 22168 21385 21938 21665 22501 22074 22033 21450 22559 21632 22312 21368 21948 21805 22611 21832 21969 21456 22498 21751 22136 21568 22016 21952 22637 22026 22117 21385 22288 21801 22207 21559 21909 21958 22647 21736 21829 21545 22490 21603 21992 21334 22256 22135 22585 21693 21860 21693 22336 21676 22213 21303 22323 22232 53 6721 10615 12025 13244 13095 13773 13960 15713 15349 34858 28512 26476 25381 24411 22970 9261 12976 16573 17249 16998 16241 17756 18130 17734 35105 28661 26667 26152 24717 23061 10345 15116 17782 18680 18455 18564 18858 20564 20361 35542 27615 25222 24480 24192 22999 13325 16539 18499 19349 21095 21324 20539 20022 20217 20839 27419 24933 23329 23085 22663 17528 19889 20935 20583 20953 21096 21600 21219 21355 21200 25267 23712 23569 22935 22830 21939 22263 22280 22621 21936 22528 21613 22221 22321 22731 21931 22040 21878 22358 22092 22361 21640 21970 21713 22584 22254 22308 21457 22167 21853 22497 21764 22231 21790 21972 21989 22729 21912 22081 21538 22421 21843 22171 21591 22057 21905 22750 21910 22400 21449 22181 21783 22567 21509 22279 21326 22237 21972 22669 21856 21993 21423 22401 21911 22185 21682 22007 21705 22761 22109 22416 21239 22295 21708 22445 21573 22301 21184 22261 21985 22768 21561 21959 21743 22544 21630 22112 21308 22114 21968 22711 21482 22026 21528 22487 21552 22231 21293 22294 21886 22792 21725 22087 21264 22473 21782 22220 21575 21869 22005 22715 21982 22072 21498 
21744 21824 21937 22161 21946 21975 21644 21543 21256 21470 21418 21704 21371 21792 21618 21999 21708 21903 21497 21543 21221 21504 21228 21643 21294 21880 21682 22169 21717 22296 21863 22288 21862 22255 21775 22086 21463 21769 21364 21616 21014 21424 21313 21600 21307 22004 21324 21768 21399 21691 21314 21850 21287 21774 21405 21815 21368 21880 21542 21968 21696 22164 21693 21975 21513 21850 21347 21693 21207 21504 21184 21686 21127 21689 21303 21228 21624 21742 21965 21465 21484 21308 22237 21559 21733 21576 22055 21600 21572 21255 22318 21494 21763 21522 22084 21351 21573 21273 22304 21378 21747 21715 22103 21163 21629 21521 22091 21202 21808 21833 22180 21168 21790 21333 22115 21131 21671 21888 22168 21117 21671 21769 22064 21097 21593 21665 22039 21135 21668 21345 22231 21403 21632 21512 22000 21561 21543 21313 22233 21197 21746 21767 22202 21303 21526 21324 22231 21533 21500 21652 22113 21164 21820 21513 21872 21200 21818 22035 21995 21193 22140 21893 21232 21699 22317 21354 20951 21336 22673 20886 21344 22442 22360 20776 21577 22043 21850 20503 21562 22039 20771 21270 22926 20844 13335 17031 17907 17128 17329 18158 19485 17634 18615 34737 24954 23307 22963 22036 21760 22355 21443 21554 22067 21716 20936 22080 21424 22009 22010 21618 21426 22124 21684 21524 22034 21735 21479 22103 21306 21509 21937 21479 21377 21984 21077 21689 21804 21368 21341 22135 21137 21750 21722 21510 21542 21823 21163 21948 21267 21703 21488 21813 21300 21968 21408 21611 21498 21818 21137 21844 21147 21991 21736 21539 21552 22020 21067 22129 21696 21669 21653 22121 21174 22032 21636 21620 21751 21794 21363 22219 21589 21778 21763 22146 21270 22228 21430 21840 21796 21741 21348 22221 21190 21684 21797 21529 21293 22215 21097 21733 21633 21600 21543 21825 21274 22102 21180 21970 21698 21543 22081 21786 21483 22608 20811 21780 21837 20876 21605 21950 20662 21916 21082 21831 22181 20954 21814 22356 20779 22421 22093 21267 22683 21714 21185 22920 20996 20768 22792 20640 21563 21726 20743 22036 21302 21350 21871 21382 21778 21932 21493 21897 21895 21438 22080 21646 21664 21920 21409 21527 21678 21474 22008 21207 21901 21820 21557 21959 21516 21454 22020 21256 21971 21228 21982 21682 21682 21909 21735 21376 22055 21552 22116 21383 22329 11271 17966 19014 19410 19545 19973 19674 20487 19600 20555 26489 23396 22737 22068 21568 22321 21181 21853 21507 21686 21591 21617 21789 22032 21282 22176 21258 21671 21712 21568 21485 21760 21582 22003 21218 22263 21412 21721 21784 21523 21456 21682 21349 22073 21207 22109 21143 21651 21712 21456 21533 21668 21527 21967 21397 22262 21082 21668 21440 21704 21704 21205 22465 21153 21456 21832 21152 22473 20663 22680 21097 21380 21864 20927 22049 20949 22225 21829 21088 21990 20814 22365 20816 22416 21422 21655 22408 20806 22144 20937 22631 21166 21665 21639 21701 21816 21688 21999 21329 21581 21609 21654 21917 21463 22065 21323 21784 21302 22034 21473 21628 21687 21724 21748 21494 22058 21475 21771 21608 22017 21482 21344 21773 21590 22042 21256 22074 21133 21968 21146 22196 21274 21780 21413 21987 21612 21942 21864 21594 21667 21580 21789 21481 21341 21917 21741 21767 21324 22042 21397 22117 21296 22234 21146 22037 21186 22282 21077 21953 21176 22253 21399 21934 21104 22101 21676 21621 21789 21559 21521 21562 21784 21809 21383 21856 21433 22115 21477 22269 21321 22072 21206 22313 21104 21908 21236 22066 21412 21734 21354 21771 21761 17941 20610 19635 21006 20169 21761 20233 20557 20953 28512 24463 21859 23106 20723 22250 20775 22884 20676 21616 21370 22450 21280 21274 22160 21232 22179 21166 22829 20795 21668 21531 21796 21668 21598 21750 21614 21644 21597 21857 21554 21910 21703 21985 21347 21720 21460 21896 21453 21675 21415 21773 21717 21428 21733 21591 21917 20754 22112 21514 22078 21409 22147 21234 22088 21435 22232 21234 22145 21524 22381 21177 22163 21211 22313 21115 21928 21239 22233 21153 22020 21168 22252 21200 22107 21207 22291 21147 22092 21077 22341 21050 22122 21170 22289 21184 21973 21169 22348 21191 22005 21044 22300 21145 21966 21171 22167 21301 22016 21301 22324 21120 22087 21440 22225 21129 22149 21427 22264 21205 22263 21617 22061 21317 22107 21523 22231 21213 22211 21297 22368 21072 22316 21058 22614 20942 22424 21203 21631 21572 21924 21115 21555 21912 21709 21272 21336 22328 21414 21319 21150 22600 21161 21431 21197 22449 20963 21654 21227 22192 21316 21879 21301 22144 21281 21931 21351 21904 21613 21877 21520 21801 21570 21952 21415 21846 21607 21881 21408 21464 21959 21465 21554 21483 21909 21507 21635 21643 21988 21385 21796 21738 17304 20269 20953 21175 20968 21585 21011 21422 20973 21723 23640 22432 21494 22326 21415 21840 21265 22247 21254 21909 21102 22396 21025 22080 21120 22374 21182 22190 21477 22157 21444 21915 21445 21612 21850 21632 21693 21638 21658 21856 21464 21907 21201 22215 21293 21848 21159 22205 21175 21991 21406 22207 21337 22105 21320 21885 21568 21796 21429 21577 21974 21518 21611 21488 22350 21149 22083 21376 21518 22103 21038 21960 20765 22883 21080 21863 21253 21401 22684 20640 22352 21528 22286 22016 21504 21488 21185 22892 20548 22272 21081 22808 20864 22280 21687 21504 22087 21376 21952 21280 22167 21393 21843 21767 21937 21624 21865 21536 21393 21924 21532 21789 21776 21714 21859 21506 21714 21243 22162 21280 21943 21304 22145 21391 21760 21523 21579 21901 21504 21648 21720 21863 21685 21664 21737 21285 22242 21060 22167 21304 22302 21336 21995 21453 21920 21686 21588 21561 21498 21911 21665 21717 21789 21112 22327 21096 22128 21337 22156 21579 21792 21486 21653 21882 21562 21661 21840 21395 22284 21150 22075 21482 21911 21643 21655 21542 21568 21939 21760 21656 21686 21252 22263 21296 21888 21436 21623 21928 21643 21584 21689 21284 21239 20628 21861 21088 21748 21713 21213 21836 21394 24007 22784 20973 22261 21104 22567 21760 21394 21703 21136 22701 21057 21952 21450 20830 22906 21143 22022 21493 21048 22843 20971 22147 21390 20797 22937 20608 22222 21621 21363 22149 21477 21808 21777 21410 21952 21776 21621 21696 21319 22095 21505 21774 21618 21409 22000 21517 21818 21751 21316 22132 21525 21576 21718 21643 21827 21860 21380 21966 21205 22092 21755 21519 21703 21725 21227 22293 21159 22146 21431 21736 21841 21587 21702 21789 21235 22325 21218 21984 21412 21635 21840 21783 21448 21909 21133 22201 21365 21889 21512 21722 21776 22000 21209 22160 21330 21649 21943 21578 21732 21711 21194 22337 21191 22048 21447 21573 21878 21824 21557 21824 21135 22352 21133 22039 21427 21510 21936 21609 21584 21767 21120 22316 21749 21552 21751 21960 21355 22103 21171 22077 21472 21971 21766 21471 21751 21810 20999 22246 21504 21705 21616 21080 22353 21767 21101 22148 21011 21357 22548 20758 22200 21505 20932 22940 20624 22071 21262 20918 22794 21504 21440 22055 21061 21890 22649 20679 22201 21384 20951 22961 20823 21996 21495 21160 22153 21478 21601 21722 21731 21793 22091 21325 21817 21571 21445 22017 21685 21437 21825 21690 21824 21768 21425 21760 21706 21271 22121 21451 21736 21596 21675 21638 21939 21225 22100 21382 21700 21992 21565 21490 22017 21512 21684 21873 21504 21706 21778 21217 22264 21457 21809 21639 21924 21423 22297 21184 21799 21614 21993 21508 22195 21153 22068 21463 21648 21751 22064 21090 22176 21253 21673 21892 21991 21195 22152 21316 21655 21888 21874 21282 21981 21431 21696 21940 21939 21200 22210 21388 21639 21680 22186 21135 22049 21398 21761 21641 22116 21231 22118 21366 21638 21881 22006 21180 22117 21362 21563 21810 21973 21232 22134 21499 21569 22006 21831 21467 21927 21305 21710 22136 21280 21720 22032 21102 21888 22377 20891 21986 21497 20874 22312 22700 21024 21632 21997 21199 21690 22574 20830 21662 21912 21048 22100 22443 20664 21862 21669 21318 21449 22736 20965 21666 22026 21297 21782 22253 21344 21872 21561 21753 21505 22065 21417 21703 21895 21517 21436 22055 21852 21481 21824 21633 21480 21736 22052 21477 21543 21853 21591 21676 21989 21571 21526 21926 20920 21633 21769 22082 21149 21912 21623 21709 21384 22285 21408 21728 21610 21824 21225 22286 21491 21530 21475 21963 21511 21801 21864 21711 21450 22021 21417 21606 21828 21968 21187 22085 21379 21680 21347 22388 21216 21761 21617 21772 21168 22322 21621 21591 21752 21843 16107 18420 18829 19028 19126 19616 19023 19697 19768 29744 24146 23479 21984 21987 21959 22282 21080 21771 21745 21785 21138 22112 21700 21523 21504 21968 10987 17879 19593 20308 19685 20691 20099 20458 20081 21133 26965 23426 22211 22501 21614 21581 21464 22784 21333 21083 21608 22136 21536 20906 22343 22316 20465 16140 19714 20045 20203 22101 20951 19959 21088 21306 20535 23987 23687 22867 20751 22050 22057 21789 20821 21805 22740 21647 20588 22251 21754 21256 20876 21985 18869 20053 21240 21230 21152 20952 21204 21639 21486 28637 23185 22344 21760 21404 21813 22026 21696 21303 22076 21561 21708 21277 22010 21869 21549 21377 21916 20311 20943 21326 21976 21445 21344 21248 21768 21208 23927 21812 22416 21879 21415 21421 22034 21345 21781 21320 22233 21616 21599 21404 22180 21335 21745 21281 22251 21657 21555 21199 21995 21543 21794 21159 21835 21842 21856 21170 21668 21742 21920 21189 21571 21702 22242 21394 21656 21498 22036 21344 21768 21061 22250 21837 21787 21174 21945 21542 21798 21200 21793 21844 22152 21325 21616 21536 21902 21221 21656 21518 22300 21413 21372 21620 21963 21345 21629 21717 22204 21388 21537 21603 21828 21826 21600 21376 22274 21698 21589 21392 22090 21444 21783 21239 22119 21831 21808 21136 22002 21605 21701 21195 21456 22120 22496 20823 21297 22028 21649 21319 21020 22148 22789 21408 20704 21456 22435 21275 21105 21068 22843 21767 20747 21291 22426 21437 21494 20915 22739 22344 21045 20795 22354 21597 21370 20773 22299 22725 21841 20532 21399 22244 21913 20903 20955 21632 22098 21751 21243 21764 21649 21660 21317 21752 22004 21776 21249 21804 21805 21597 21606 21433 22048 22023 21426 21530 21828 21735 21422 21432 21924 22115 21232 21536 21777 21852 21461 21463 21723 22083 21646 21496 21475 21934 21383 21622 21360 22261 21890 21766 21252 22075 21508 21996 21243 21972 21882 21928 21146 21844 21581 21881 21302 21696 21861 22194 21210 21525 21600 21978 21279 21539 21484 22333 21642 21687 21152 21808 21593 21873 21398 21533 21732 22247 21248 21617 21608 21953 21707 21636 21412 22290 21402 21589 21224 22234 21320 21962 21040 22128 21797 21704 21136 22185 21381 22183 21280 21688 21797 22060 21129 21664 21553 21846 21313 21602 21376 22319 21696 21613 21166 21991 21696 21882 21273 21545 21521 22265 21561 21459 21385 22114 21419 21861 21303 21734 21843 22133 21293 21568 21573 21914 21282 21572 21281 22180 21795 21672 21081 21781 21660 21776 21402 21632 21676 22338 21731 21524 21421 22139 21547 21575 20704 22004 22600 22096 20522 21746 22228 21664 21173 21072 22006 22914 21399 20781 21658 22498 21536 21331 20693 21832 22691 22140 20539 21209 22137 21520 21110 21016 22025 22855 21442 20822 20838 22249 21668 21347 20979 21440 22640 22543 20954 20876 21988 22322 21701 21682 21371 21850 22117 21736 21413 21457 21896 21677 21481 21427 21549 21904 22064 21646 21333 21597 22009 21607 21613 21661 21448 21806 22068 21737 21403 21474 21942 21625 21627 21267 21675 21944 22101 21383 21517 21534 21966 21449 21749 21351 21675 21853 22152 21366 21501 21645 21925 21486 21760 13092 18109 18960 19088 18939 19930 19603 19881 19594 19681 26248 24212 22622 22174 21352 10777 18089 19776 19611 20235 20304 21237 20578 20632 20188 27432 23445 22663 21801 21713 21754 18824 20214 20848 20238 21051 20886 21227 20623 21034 27690 24127 22422 22427 21427 21659 18359 20839 20750 21287 20616 21179 21115 21780 21545 21543 22778 22061 21924 22181 21316 19424 20535 21191 21268 22106 21480 21801 20923 21611 21577 23137 21682 22163 21249 21741 21877 22346 21736 21712 21198 21899 21736 21718 21098 21545 21392 22310 21792 21760 21216 21441 21539 22076 21453 21742 21122 21783 21876 22232 21485 21545 21158 21609 21751 21936 21393 21504 20929 22073 22401 21925 20832 21334 21932 22213 21267 21403 20810 21333 22380 22893 21639 20883 20495 21989 22177 21702 21609 21062 21222 22784 22712 22571 21004 20822 21664 22375 21386 21486 20785 21419 22587 22660 22000 21044 20694 22203 22241 21595 21159 20864 21429 23010 22427 21365 21312 21448 21977 21573 21584 21300 21596 21878 21966 21504 21381 21522 21928 21527 22040 21287 21536 21940 21969 21703 21405 21391 21952 21573 21616 21368 21427 21800 22116 
35713 36278 37696 40115 38056 38400 34564 33288 40054 42962 42410 35402 41745 36176 34165 38623 35368 37495 43059 33740 40056 32749 40087 34699 40775 37321 34920 40185 35567 41341 37312 41221 37168 41490 36320 39324 42817 36111 41494 34311 37698 42027 41137 34096 40977 38631 41229 35946 41879 35415 40839 37024 40822 36160 42000 36771 41568 37350 33335 37810 34998 40003 35415 38285 33011 36654 41383 35441 40044 32743 39365 35149 39085 35200 40943 37160 42007 36772 33264 38150 42360 38569 32960 37789 34419 39960 35159 40865 35312 39683 34695 40521 36704 41088 37196 40932 36960 40967 36514 41800 36960 39456 34432 37104 33324 35797 40448 33324 39184 43100 39066 33158 36341 41216 39900 39367 35063 36889 40144 39351 35048 35765 38860 38937 34104 34520 38778 39432 34822 41192 41277 42240 34376 32661 38176 33619 33237 40712 41184 40202 35847 35857 40602 41181 33296 40967 41248 33514 42869 34766 39504 39657 36629 32898 36745 39736 36586 38729 38661 39937 40204 37393 40152 35341 41798 41709 37578 41244 35245 36368 41160 43296 42459 35410 33706 38812 36891 32218 33338 38704 35269 40422 38203 36146 28215 35840 35607 37128 39188 38552 32058 32314 32640 41540 39101 42176 38672 38755 35598 42121 42612 33632 38992 35386 36997 39086 42080 38836 38766 34274 41947 40072 35050 32887 38433 35796 42789 39918 41096 33062 37536 42912 41799 38375 38664 35169 36208 41555 41681 40288 39255 35936 35420 32768 33067 36544 39596 38059 40501 35488 42607 36672 40787 38128 41837 34552 42864 36720 39111 36761 39408 38646 35633 33201 33051 38282 38620 39876 35083 34745 34480 39688 39783 38647 34356 34112 35826 35986 41569 41133 34117 35715 35692 39787 40635 41026 42450 36775 36082 35789 41271 41162 40000 35053 36106 33093 40704 41035 39040 35724 34166 33734 33236 36252 40528 39720 39863 38208 35098 33318 39040 36141 42847 34544 35664 35826 36708 36352 34115 37898 34112 37425 38651 36793 40404 37446 36460 42070 35616 42771 39818 40613 35584 35174 39549 37913 37527 35089 36248 33536 33536 35429 34863 38584 40960 41646 37524 41669 36071 37701 43013 37564 37384 42480 39344 34724 34439 37271 41904 33438 34840 42496 38823 40197 37600 36540 33505 37977 33000 42364 38695 40337 38341 40344 38592 34950 34796 37348 35749 41304 39296 33368 39477 41879 42156 26969 35825 37019 41135 32841 37088 34176 31815 32802 32665 45092 43349 36179 39066 33523 41499 40084 37130 32809 34838 33920 34057 36060 38480 40632 40296 40516 35084 35056 33336 42768 35783 33856 38448 40128 41618 42162 35746 35912 32971 42096 35090 41370 39448 40243 39918 39494 34673 35040 42201 33564 34522 33067 38150 41900 41584 38866 34787 41986 35380 35073 39926 43360 39574 42467 36748 39206 43526 34476 35063 38740 41625 37122 37218 38854 37329 40859 36729 38547 38457 35896 42377 35782 42509 42508 34916 42438 35863 39715 37216 34893 39536 34776 34380 35091 36258 34952 38642 41193 34112 34048 34458 37542 42718 39288 41349 36148 40853 38807 42716 34720 35028 35424 35639 42905 39296 42875 36216 34060 38293 42891 41472 36197 33882 38694 40368 39392 39377 38075 39360 40595 40740 36048 41992 38615 34308 37729 36966 33990 34614 33688 36042 42784 41736 37871 35873 35867 41082 39011 41968 39990 40788 41168 39513 38896 39761 41439 38816 37963 39639 41491 42197 38078 38785 39644 35027 34281 36080 33594 32745 33363 35776 36206 41728 36928 42310 39955 42932 41864 41362 39334 40136 41872 38960 37432 40304 39175 42043 35849 41427 36165 35610 35799 33175 33504 37664 39552 35772 39941 33088 37088 46464 45003 37337 39841 34964 41120 35520 37440 34123 33952 41497 43305 40713 40737 40098 40309 40517 39821 37163 35603 34630 33117 35916 34632 34012 35678 34283 34343 33997 36697 33362 37275 35297 38192 41475 35563 42405 37428 42622 35233 42073 36224 35384 42034 35840 33984 37524 35004 39392 33043 39209 42008 40220 40392 39446 42545 41168 40455 40018 33104 42432 39961 40299 40338 41864 39400 37697 40556 41170 39504 38577 39472 41356 39965 39857 40271 41576 39640 39559 38737 42100 38529 39864 39635 41444 39747 38344 39568 42240 40160 38771 38208 41622 39508 38343 39672 40448 41072 38505 40976 41938 39014 39561 42249 41050 39297 40115 42360 41547 40228 41634 34359 39065 41175 39912 33172 40881 40416 40880 40960 42322 38599 41818 38471 34600 37162 42740 40235 34809 33504 37354 39179 33560 37272 35392 40368 41344 42046 42282 41459 39640 34408 39360 42472 40244 43255 37664 34640 40253 40506 41117 37499 40952 39926 40696 37986 41633 37391 34372 37085 32804 36060 33495 37600 42184 37010 34256 37136 41771 42776 38388 42723 33648 42758 37702 32859 34136 34412 38187 41778 36304 35648 38763 40676 37451 39794 37495 33792 37643 42261 37870 35626 35414 42646 43266 42160 42440 36760 40360 41411 40523 37604 39046 42798 38147 39141 38912 42496 40120 40754 42960 40483 42470 37856 42460 34493 36730 34112 35109 34314 34516 36631 42493 37657 39884 41010 41107 36920 39571 40940 39943 38672 42133 41120 41544 39816 41139 37584 33477 35924 42189 34005 38098 33122 34108 42551 42496 39713 39435 41534 33280 39520 38320 38037 35296 37462 38582 37152 40315 42057 35584 33512 41800 33250 41264 38534 32640 42456 39879 37848 32658 40796 38824 36641 36002 41137 35296 32481 39265 41493 37970 40502 40487 41893 36968 35835 37649 34330 36929 33015 41489 37728 33231 36054 35661 35199 36880 32681 35052 40464 40214 40592 38129 40914 40036 42139 35761 32973 33658 37289 32602 34117 35248 37005 35049 34448 35544 40624 41176 38483 40380 41016 41858 41452 38790 42681 37638 35055 33728 33400 42828 37800 34720 35306 36128 38893 42058 38980 39782 41480 40288 34025 35812 42904 34884 37158 33587 34652 36426 41773 41578 39670 39488 42944 37821 34604 34598 33164 33262 37648 35565 34473 34904 40073 41607 40874 37158 42346 34720 37490 34586 33531 34919 40471 40656 33699 36843 38551 35771 35228 40056 36803 41681 39936 36304 37608 41397 38938 34086 35440 41589 35547 38916 35733 38204 37801 42482 36267 37835 39431 38656 43077 38442 37266 37637 39979 42008 35872 38075 33218 40768 34532 41475 40199 42956 36424 35832 41840 37967 35800 34288 34816 41072 39840 32858 35798 34135 41732 38577 33156 36285 35910 40896 40020 33238 33448 35243 34487 36422 36864 41524 38425 40075 39576 36123 33136 35120 35532 40280 41618 39781 39981 42508 35824 36586 33879 35047 36120 40312 42021 40288 38320 41990 34611 36418 36088 42285 37672 39306 40753 41846 37330 32800 35296 35648 38309 40152 40080 41254 34656 37860 33808 35355 35437 39765 42000 40163 38865 42596 33971 37061 36337 33487 36162 39320 42073 39473 39008 42309 33127 37440 34208 33509 35735 38730 41834 36057 33211 35767 37890 41640 39887 39750 39520 42616 38432 35862 42848 36208 36231 37704 41183 32812 35045 33990 38413 42128 36160 38947 39992 37936 41672 33852 34880 40448 32872 36729 38150 33435 39116 40619 37032 36452 32568 41856 39323 38513 37130 35061 34250 40523 41769 37562 38357 36014 38445 43162 39669 40187 42956 34266 35342 35511 35962 39482 41384 36666 33638 42200 38664 35121 42348 36672 35052 36230 35696 42028 35749 35202 40528 39952 42720 35831 33957 34854 34263 37689 40289 39589 41778 35303 38293 33809 42624 38682 32865 34712 36945 32587 35040 35755 39986 41443 42677 36538 34468 37414 42373 41772 39792 36455 34304 38337 32791 40368 39460 39193 42794 34632 35825 38870 38742 40221 40448 35036 37037 38537 40056 40085 41096 34920 36903 37040 40548 38592 42437 35176 37666 37865 39776 40736 41936 34732 34649 40343 39520 38951 41943 35877 34384 39524 40640 39912 41796 34614 37173 38626 39821 39883 41653 33945 36120 38189 40193 40099 43302 33856 38488 36775 42728 38020 41016 35577 39842 40576 35514 38465 39081 37050 42496 36885 38252 43088 36592 41562 35755 37732 34136 38520 40184 35203 34056 35889 34733 37308 38183 39472 43333 34304 36853 34816 40938 42612 36049 37428 34656 38534 40808 36145 41328 41401 37140 33588 35728 32605 38842 42196 35543 37296 33080 42124 39313 36999 42829 36582 34218 42552 35813 38823 42880 33697 36852 34040 34753 38326 33735 32896 37462 36931 34240 35712 39142 39565 37510 34498 35301 41486 41695 42021 35598 34110 36193 40209 41623 43176 33475 42531 38416 33032 36077 36889 35527 42368 38802 42202 34387 36368 37936 39823 39475 41733 35015 41297 42702 40209 35808 34135 35752 39334 41801 34583 33939 35634 36635 37900 40930 35336 37109 38336 33300 37254 34374 34945 38680 41079 44180 38488 38480 38199 41380 38745 36036 35648 36000 39046 39572 35216 32948 32358 37752 33979 35302 33044 40610 34495 34263 38540 42585 38759 39316 40209 43288 41015 43962 34682 33799 42330 36384 41255 38945 34152 39781 33074 36538 42087 42023 42778 38185 34416 38162 40059 39693 37514 37482 38529 41030 32839 39248 36223 37352 35157 38720 39131 36249 35783 36327 35897 34679 33134 41112 36096 40224 36487 38279 35620 38201 40374 40551 39348 37300 39897 34635 42841 48386 41208 42182 35772 41895 36624 38615 35021 40939 39458 33707 35100 40620 38837 37291 33543 41313 37738 41072 37552 41274 38355 42464 41460 40240 35892 39891 39080 36385 42496 37559 42199 42520 38880 41408 36199 40953 41216 34281 34129 41789 40500 41541 35914 40492 41472 34871 33385 39952 38720 33489 35889 39511 36848 36624 36723 39490 34816 35715 37324 39844 33809 35041 40905 41895 34804 42887 38922 41280 35936 38358 41248 36972 36179 39608 38032 33349 36036 39702 36176 36644 39928 41424 34299 32887 37250 40200 34716 32931 41351 42280 41997 34483 38081 41352 34786 35309 40617 41932 33388 33915 36325 36352 33852 41216 41323 35264 33848 41416 39595 42411 36360 40476 40013 36842 36160 38954 38560 34210 35072 39898 42459 39913 43648 36242 40696 38829 34550 41024 38092 39924 36560 41792 34593 42170 43239 40988 39057 38564 37274 35940 34930 40740 43056 42784 43273 37113 35957 41949 38475 35660 41984 34385 41564 35415 41533 36048 36631 32423 41699 41248 37716 36864 37404 34123 39279 36062 40519 35840 34401 34580 40960 35950 38469 35820 40098 36432 36391 34105 33941 42125 38938 38795 42182 33399 36306 35704 42180 42450 37768 39758 40272 33200 35678 36832 42572 42987 35856 39270 34708 42778 43024 38128 41816 34599 41248 41584 37296 35820 40128 39499 32858 38290 40622 38261 37318 37616 39334 36791 33888 37122 40903 35116 36897 40448 40219 33264 33681 38117 40872 33467 42649 42368 34690 35050 39078 36256 33933 36914 41830 33550 35335 41181 40240 34376 33943 37734 35313 34208 41760 41530 42145 34192 40016 41152 41196 38250 38032 39732 36323 35121 38912 40537 41834 40640 40618 35139 36104 39056 39201 34648 33244 36618 40890 34167 41224 42185 35186 34268 39514 38643 35023 37174 40567 33541 32730 41195 33792 42379 41989 39828 42368 37218 41008 35796 36704 39944 41058 33632 33526 37352 40553 33783 40388 40441 36330 34732 38559 36064 34656 35632 41834 34355 34773 41752 35820 32912 42027 40352 33652 33639 34233 38356 34336 39187 32496 35447 40779 34743 39528 38426 38676 37788 42039 35651 34578 43434 33372 41034 34620 36394 35360 40000 32867 39838 40141 32983 38807 37847 38656 37392 42281 36053 35959 41152 34905 41312 37808 42137 34952 33715 37173 36342 38272 41792 35440 34780 41700 37042 39767 35696 41984 42695 37442 35047 42710 42521 33792 37044 38928 34691 41152 34323 38567 34314 34211 34656 42193 36624 39072 35777 41968 42871 38131 34472 34406 40354 35118 37715 39595 41904 33334 33094 38048 42496 36082 41524 35184 36918 39941 41797 43447 34896 37571 42994 35803 35410 37823 36290 37664 36544 36953 33237 36240 33082 34087 42350 41971 34992 40336 41568 31744 37304 35026 33431 39978 40784 40560 33159 33401 39593 45035 43864 35465 36216 35238 35692 34907 39948 36087 40140 38544 36528 40326 33902 37952 37657 41126 43026 43303 42551 35063 40294 36261 34967 40706 33584 39672 39270 35980 33304 33239 36328 39168 37639 40433 41108 41417 32882 39714 40503 39744 42880 36535 37032 34302 33613 40085 35024 40070 40315 35979 37157 42072 35808 35111 39914 37539 35592 35351 38824 33451 41385 41857 36172 35507 39867 42379 33528 39128 42696 36120 38865 36184 37050 40904 43201 33684 39288 34290 35815 37543 41731 32850 36704 39208 42581 37927 35817 41178 37920 40819 40659 42202 35893 41181 42690 38081 34587 36336 32157 38180 40313 35368 34045 38266 40229 36289 35565 34033 37605 35824 34475 42393 41990 43224 35588 42116 34567 34787 38300 38198 34483 40633 41191 34317 39403 36119 42169 39112 43114 41959 41056 42534 38533 33783 33498 40616 34185 37067 38221 32654 41428 33132 37428 33208 38482 40887 33224 37572 38104 35376 41984 42218 38015 33756 33932 41440 42438 36388 39617 
23629 23417 23628 23211 23154 22878 23119 22958 23348 23251 23697 23395 23819 23318 23457 22775 23111 22839 23319 23004 23330 23018 23387 23087 23556 23222 23702 23192 23731 23149 23523 22967 23360 22729 23175 22671 23132 22695 23285 22848 23392 23086 23655 23256 23776 23331 23874 23493 23721 23351 23827 23383 23858 23355 23748 23274 23744 23110 23456 22913 23395 22775 23232 22784 23186 22793 23319 23005 23303 22892 23404 22903 23399 22968 23513 23095 23572 23149 23641 23132 23697 23157 23616 23168 23648 23173 23629 23157 23621 23212 23722 23257 23554 23104 23424 23021 23389 23053 23475 23158 23592 23271 23597 23194 23496 23095 23288 22977 23209 22914 23274 23081 23435 22905 23035 22392 22804 22503 23250 23632 24342 24103 24260 23700 23568 23199 22947 22409 22459 22152 22368 22359 22811 22975 23310 23527 23841 23759 23918 23775 23882 23515 23264 22848 22816 22674 23007 22825 22647 23253 23084 23020 22855 23724 23072 23079 23270 23507 22836 22896 22967 24000 22361 22997 24030 22999 22631 24109 23704 22612 22419 23390 23490 22341 22673 24272 23007 22694 23910 23380 22666 23761 23789 2499 14733 16215 17405 16408 16753 18141 17615 16913 17867 30058 25769 25062 25001 24064 24430 24220 23798 23785 24112 23518 23767 23768 23405 23517 23770 23209 23456 23444 23572 23248 23738 23114 23671 23506 23296 23527 23707 23003 23905 23229 23287 23451 23680 23074 23886 23291 23500 23384 23552 22754 23829 23048 23144 23378 23239 22924 23891 22897 23448 23342 23342 23063 23864 23003 23421 23381 23127 22926 23727 22720 23463 23104 23175 22900 23529 22567 23467 23146 23130 22944 23664 22636 23334 22871 23219 22862 23529 22616 23538 22842 23189 23049 23171 22806 23481 22659 23508 23147 23123 23257 23447 22714 23569 23124 23104 23256 23399 22755 23630 22926 23189 23261 22935 22913 23346 22819 23528 22412 23339 23303 22674 23811 23315 22615 24156 22928 22767 24095 22403 22752 24092 22070 23040 23476 22230 23045 23325 22471 23686 22528 22657 23569 22482 23207 23874 22593 24214 22854 22935 24103 22932 23034 23311 22832 22871 23442 22667 23177 22996 22966 23111 22848 23119 23248 22962 23515 22855 23071 23341 22856 22787 23408 22657 23168 22700 23458 22880 22740 23194 22986 22725 23413 22629 23414 22514 23611 22679 23172 22891 23180 23012 15707 17553 18519 17998 19280 18329 18978 19233 19022 18765 26394 24354 24786 23579 24440 23657 23735 23712 23689 23133 24006 22896 23699 23159 23559 23311 23215 23414 23613 23510 23968 22713 23484 23047 23314 23183 23316 23117 23605 22742 23710 22796 23238 23285 23055 23149 23104 23216 23489 22918 23711 22711 23214 22856 23184 23189 23118 23367 23299 22941 23511 22479 23729 22520 24070 22632 22896 23820 22257 23463 22601 23764 23063 22142 24112 22119 23307 22540 23544 22800 22923 24022 22171 23259 22692 23325 23513 22468 24055 22105 23455 22640 23292 22929 22759 23292 22792 23361 22857 23436 22796 22920 23108 23115 23196 22964 23452 22821 22953 22894 23137 23143 22787 23157 22881 23422 22844 23393 22632 23404 22568 23589 22640 23143 22755 23262 23046 23164 23177 22954 22942 22976 23176 23045 22608 23201 22759 23348 22323 23527 22491 23416 22513 23559 22720 23221 22454 23495 22670 23146 22716 23286 22913 23613 23091 22977 22982 23102 23201 22913 22912 23047 23162 22978 22787 23137 22810 23409 22782 23560 22550 23202 22477 23451 22667 23095 22967 23094 22950 23056 22930 22987 22997 23018 23225 22793 22920 22871 23242 23025 22715 12728 18418 20011 19159 20757 19171 20777 19436 21312 19692 26090 24590 24087 23996 23356 24384 22592 23915 22678 24193 22680 23480 22627 23792 23356 22793 23677 22603 23799 22615 23407 22919 22936 23082 23262 23076 22825 22956 23142 23124 22952 23132 22952 23301 22949 23559 22682 23351 22671 23628 22588 23157 22666 23435 22755 23181 22756 23362 22784 23052 22969 23228 22930 23125 22967 23145 22869 23113 22784 23133 22922 23497 23000 23114 22977 23212 23080 22891 22984 23052 23151 22969 22966 23149 23126 23040 22942 23296 23094 23017 22902 23261 23134 22967 22981 23160 23149 22944 22884 23191 23111 22880 22886 23003 23184 22885 22928 22853 23111 23044 23108 23205 23079 22932 23013 23399 23086 23089 22984 23584 22781 23275 22727 23033 22629 23267 22929 22945 22720 23350 22832 22715 22945 23204 22961 22712 22785 23854 22232 22877 22368 23907 22125 23069 22269 24032 22074 23236 22279 24081 21947 23351 22200 24008 22005 23321 22429 23269 22758 23089 22882 23234 22829 23098 22980 23216 23140 22848 22896 22808 23222 22784 22953 22698 23352 22640 23057 22528 23440 22528 23213 22709 23513 22533 23367 22551 23473 22602 23300 22634 23386 22648 20023 20256 21228 20975 21067 20793 21205 21197 21218 29017 24035 23693 23296 23210 23140 23337 23059 23040 23104 23132 23080 22885 23220 23050 23223 23017 23174 22965 23360 22888 23053 22607 23524 22517 23481 22573 23317 22870 23189 22680 22969 23121 22906 22923 22839 23142 22876 22937 23013 23011 23178 22923 23029 22709 23416 22692 23175 22429 23526 22517 23395 22662 23590 22539 23473 22061 22972 23485 22538 22976 22375 23965 22470 23402 22804 22352 24068 22008 23661 22503 23431 22980 23040 22889 22389 23832 22061 23480 22697 23808 22684 23296 22610 22549 23136 22753 22935 22912 23165 22862 23079 22904 22946 23214 22849 22957 22656 23412 22532 23343 22594 23139 22953 22978 22770 22800 23208 22823 23045 23147 22982 23073 22860 22997 22558 23528 22506 23326 22833 23403 22668 23351 22645 23003 23029 22921 22871 23019 23005 23089 22828 23063 22667 23412 22439 23233 22496 23446 22496 23433 22637 23131 22946 22897 22924 23206 23056 23190 22672 23149 22471 23634 22484 23381 22656 23048 23069 22992 22873 23024 22946 23288 22535 23205 22531 23481 22599 23415 22689 22896 23143 22913 22965 22960 22511 23532 22580 23201 22673 22966 23104 19620 21697 22039 21840 22431 21649 22286 21307 22359 22337 23537 23352 22647 23767 22704 23083 23095 22176 24213 22092 23652 22528 22594 23786 22218 23217 22732 22319 24224 22105 23645 22571 22696 23946 22056 23602 22676 22573 23174 22747 23087 23021 22536 23372 22705 23136 22823 22819 23269 22801 23070 22980 22624 23409 22563 23400 22735 22936 23245 22999 22877 23069 22652 23388 22784 23076 22869 22932 23093 22996 22703 23260 22661 23264 23050 22863 22949 23488 22690 23490 22432 23493 22689 23209 22980 22853 22959 23168 22431 23581 22477 23357 22612 22893 23087 22944 22843 23168 22328 23542 22588 23249 22733 22960 22674 23507 22514 23434 22471 23176 23154 22823 23011 23093 22593 23567 22407 23351 22656 22942 23083 23028 22930 23108 22505 23586 22478 23375 22714 22876 23123 22927 22858 23156 22768 23340 22912 22913 22917 23040 23058 23287 22543 23243 22675 22999 23313 22830 22935 23126 22272 23964 22394 23300 22756 22465 23759 23458 21952 23696 22627 22986 23872 22057 23532 22687 22309 24128 22020 23473 22723 22382 23912 22870 22081 23655 22916 22976 23781 22080 23604 22692 22204 23951 22760 23127 22986 22616 23482 22859 23004 23040 22893 22970 23335 22695 23154 22870 22965 23156 23244 22692 23140 23109 22914 23225 22835 23047 23046 22564 23400 22894 22905 22954 23273 22756 23534 22546 23388 22733 23046 23018 23306 22556 23373 22301 23093 23153 22900 22919 23235 22556 23429 22883 22995 22876 23134 22392 23493 22862 22968 22970 23126 22609 23611 22605 23259 22791 23086 22777 23502 22384 23465 22807 23257 22785 23554 22488 23277 22735 23089 22888 23428 22471 23416 22669 23125 22860 23541 22520 23057 22964 23139 22475 23561 22736 23089 22951 22853 22813 23555 22560 23271 22821 22937 22922 23500 22618 23088 22880 23127 22887 23433 22528 23402 22673 22960 23240 23291 22459 23379 22686 22514 23655 23247 22368 23670 22976 22613 23930 22630 22120 23804 22649 22407 23737 23321 22155 23736 22581 22455 23992 22930 22272 23648 22559 22432 23943 23385 22006 23751 22677 22423 23816 23216 22518 23210 23011 22591 23451 22945 22813 23072 22949 22770 23093 23313 22791 22908 23216 22144 22845 23252 23126 22628 23357 22734 22867 23150 23241 22631 23275 22755 22965 23023 23504 22606 23196 22937 22901 22576 23524 22885 22811 23077 23067 22546 23439 23017 22880 22919 23221 22647 22915 23080 23429 22459 23431 22666 23041 22977 23520 22529 23310 22902 22995 22684 23641 22683 22965 22890 23117 22593 23376 23115 23064 22776 23360 22812 23068 11243 15104 15424 16721 16254 16695 17053 17328 16664 17715 27733 26115 25268 25550 24172 24604 24171 24252 23630 24321 24043 23800 23528 24096 23412 23610 23668 16124 17139 18472 18442 18909 18432 19545 19127 19100 19013 26999 25145 24949 24477 25016 24050 23802 24289 23939 23365 23221 24272 24657 22936 23689 24055 23367 17681 20472 20175 19129 20504 20681 19864 19844 21242 30587 24447 24848 24779 24112 23313 24647 24546 23031 22712 24202 23565 23313 23001 24535 24084 22927 23669 20324 21147 20784 21543 21550 21419 20999 21529 21412 26048 24033 24192 24176 23700 23273 23888 23396 23416 23178 23939 23600 23316 23242 23672 23181 23473 20033 22448 21966 22031 22176 22512 21942 22229 22295 22772 23966 23616 23353 23796 23121 23288 23125 23911 23270 23233 23129 23699 22932 23364 23089 23822 23064 23260 22988 23709 22934 23411 22635 23779 23369 23336 22807 23729 23073 23383 22894 23383 23360 23800 22870 23356 23173 23559 23104 23164 23181 23813 23171 23250 22983 23681 23029 23488 22695 23673 23326 23486 22743 23378 23218 23409 22900 23406 23372 23821 22909 23299 23233 23430 22752 23103 23277 23812 22904 23220 23312 23328 22839 23092 23334 23661 23073 23095 23116 23547 22929 23156 22977 23776 23175 23047 22855 23684 23017 23058 22561 23545 23573 23490 22625 23352 23430 22993 22535 23177 24007 23871 22309 22925 23744 23349 22656 22602 23143 24332 23144 22350 23331 23518 22684 22631 23256 24221 23718 22327 22957 23876 22787 22873 22699 24175 23744 22387 22503 23876 23276 22848 22627 23056 23868 24080 22839 22900 23504 23092 22584 22727 23441 23396 23149 22796 23361 23063 23115 22749 23150 23444 23488 22791 23209 23319 23222 22938 23093 23380 23393 22758 23419 23204 23155 22855 23249 23289 23633 22896 22946 23184 23347 22903 23034 23136 23747 22927 23019 22871 23566 22931 23127 22756 23668 23147 23063 22821 23538 22950 23212 22659 23493 23209 23428 22631 23373 23104 23280 22669 23099 23208 23684 22735 23121 22960 23610 22738 22981 22689 23303 23280 23580 22656 23273 23060 23336 22845 23213 23157 23751 22647 23134 23027 23456 22764 23330 22694 23804 23024 23114 22689 23623 22725 23273 22636 23652 23207 23396 22503 23464 22995 23277 22692 23063 23179 23664 22784 23018 22939 23511 22817 23232 22613 23277 23179 23638 22802 23093 23077 23355 22825 23126 22726 23751 23154 23194 22622 23302 23207 23305 22686 23033 23162 23655 22948 23014 22837 23511 22970 23150 22766 23428 23367 23425 22694 23120 23154 23334 22851 22792 22839 24018 23680 22770 22449 23630 23297 22928 22460 23072 24126 23844 22203 22635 23673 23175 22913 22640 22744 24007 23891 22715 22233 23517 23501 22807 22528 22841 23978 23812 22336 22541 23602 23319 22647 22820 22454 23991 24099 23115 22106 23431 23752 22907 22733 22545 22901 23502 23379 22878 23046 23200 23271 22792 23208 22716 23367 23433 23414 22752 23129 23200 23200 22967 23007 22836 23595 23361 23500 22807 22967 23183 23298 22839 23125 22738 23496 23296 23224 22642 23243 23132 23240 22655 22955 23082 23648 23140 23219 22651 23296 23116 23177 22996 23091 23064 23660 23047 13645 15100 16342 16087 16784 16332 17445 17193 17584 32076 27031 25730 25839 24685 24819 15546 17989 18556 19276 18507 18968 18918 19592 18855 19510 26660 26320 25441 25416 24234 15597 19241 20446 19988 20465 20013 20653 20665 21024 20224 26672 25021 25403 24497 24536 24054 20649 21029 21740 21640 21978 21238 21440 21182 21997 26428 24865 23991 24057 23924 24676 21930 22808 21980 22380 22262 22978 22283 22572 22076 22452 24160 24531 23865 23958 23215 23771 23638 24081 23404 23432 23183 23682 23666 23994 23214 23461 23317 23937 23404 23559 23006 23439 23252 23996 23547 23523 23034 23497 23479 23729 23131 23463 23281 23387 23447 24025 23496 23168 22912 23879 23534 23275 22917 23083 23732 24568 23872 23249 22322 22958 23864 23808 22951 23049 22604 23486 24149 24476 23121 22445 22557 23532 23929 23253 22948 22807 23276 24368 24104 23297 22299 23444 23959 23920 23113 23034 22650 23424 24225 24110 22917 22534 23447 23594 23272 23276 23207 23044 23725 23466 23376 22914 23209 23416 23338 23076 23104 23136 23749 23525 23312 22870 23101 23399 23401 23097 23240 22882 23676 23421 23601 22919 23232 23289 
22613 22285 23033 22748 23127 22649 22806 22107 22384 21752 22234 22064 22528 22088 22696 22457 22907 22284 22553 21803 22171 21544 21952 21526 21968 22186 22808 22858 23367 23277 23834 23647 23971 23523 23708 23003 23162 22296 22349 21703 21612 21137 21518 21348 21605 21676 21843 21840 22022 21811 21253 21668 21993 21769 22055 21767 22113 22059 22504 22484 22872 22813 23113 22776 22857 22378 22334 22368 21856 22169 21684 22073 21677 22115 21868 22173 21941 22211 21984 22312 22080 22215 22124 22285 22366 22442 22176 22720 22263 22676 22173 22712 22592 22972 22416 23093 22519 22849 22509 22921 22257 22532 21991 22336 21875 22259 21540 22093 21717 22257 21852 22617 21938 22853 22247 22843 22200 22660 21835 22550 21504 22487 21633 22244 21613 22421 21765 22784 22272 23156 22348 23156 22312 22989 22405 22727 22203 22758 21769 22565 21768 22237 21481 22427 21537 22663 21860 22834 22232 22945 22001 22797 21822 22473 21543 22262 21602 22257 21596 22630 21899 22990 22219 22991 22368 23119 22205 22896 21949 22729 21799 22172 21445 22195 21745 22608 22151 22856 22322 22830 22197 22624 21937 22350 21471 22296 8899 9615 11295 10616 12376 12352 13183 33313 32160 29815 28684 27209 27184 25379 26084 24823 24950 24157 24553 23369 24449 23412 23705 23127 24160 22575 23513 23134 22988 22816 23175 22515 23350 22365 23049 22604 22595 22678 23321 22013 23121 22599 22555 22631 23213 21627 22988 22596 22115 23228 22924 21703 23841 22493 21789 23606 22741 21672 23566 22704 21700 23277 23028 21481 24068 21284 21781 23500 21593 21807 23630 21117 22016 23433 21329 21732 23614 21123 21859 22891 21731 22357 22496 22151 22016 22866 21763 22122 22554 21989 22083 22546 21753 22582 21926 22471 22432 22149 22167 22709 21762 22580 22325 22016 22180 22837 21653 23018 22040 22464 22493 22290 21803 22873 21659 22656 21921 22359 22104 22183 22055 22903 21501 22908 22126 22276 22267 22665 21717 23145 21754 22391 22432 22357 21770 22961 21561 22476 22130 22359 21847 22711 21728 22921 21488 22935 22108 22148 22422 22656 21792 23080 21465 22548 22432 22184 21841 22999 21325 22793 21561 22614 22037 22073 22311 22607 21972 23076 21813 22366 22395 22169 22176 22179 22295 22647 21664 23089 21658 22468 22133 22242 22116 21873 23104 21913 21961 22535 21703 7727 8551 12308 12976 12825 15513 14998 14891 17527 32119 30345 30483 27392 27380 25218 25654 25750 23603 25658 23749 23691 24791 22451 23179 23172 23271 23312 22818 23029 23187 22515 23598 22435 22944 23047 22404 22665 22580 22561 23000 22216 23316 22426 22857 22796 22393 22428 22471 22377 22956 21975 23154 21960 22778 22376 22434 22455 22369 22457 22789 21299 23189 21813 22848 21729 23104 22055 22533 22506 22364 21954 22400 22230 22862 21802 23121 21568 22604 21785 22873 22190 22621 22435 22379 21921 22725 22149 22848 21795 23194 21580 22812 21735 23091 21929 22545 22102 22449 22172 22561 22268 22582 21824 22733 22054 22832 21873 23129 21568 22652 21584 23040 21792 22370 22071 22420 22144 22761 22324 22228 22292 22183 22456 22289 22083 22215 22215 22838 21969 23224 21212 22956 21029 23815 21031 22138 21497 23018 22058 22299 22994 21516 22737 21494 23493 21031 22561 21392 23472 21381 21967 21900 22601 22451 21418 23204 22193 22449 22346 22578 21943 22282 22055 22672 21909 22081 22420 22292 22478 21993 22933 21731 22492 21627 22981 21793 22552 22124 22667 22163 22322 22226 22435 22187 22405 22588 22064 22097 22235 22306 22295 9235 12640 13286 15702 15279 17383 16406 17989 16996 18842 29728 28412 26563 26364 25232 24739 24475 24024 23568 23477 23523 23238 22757 23373 22872 23289 22503 23415 22048 23286 22087 23360 22016 23127 21806 23387 22077 22883 21858 23355 21920 22895 22020 22786 22374 22503 22566 22381 22481 22458 22704 22259 22320 22276 22615 22375 22144 22491 22349 22609 22017 22675 22656 22569 21994 22613 23053 21830 21968 22314 22584 22435 21725 22755 22027 22933 21800 23590 21197 23168 21530 23669 21161 22784 21802 22852 21880 22727 21652 23076 21505 22766 21991 22589 22213 22325 22267 22541 22076 22385 22254 22697 21943 22417 22125 22620 22109 22512 22588 22465 22305 22288 22375 22248 22405 22220 22423 22128 22593 22136 22423 21743 22945 21847 22533 21902 22881 21951 22505 21901 22930 21825 22505 21767 22893 21741 22551 21497 23079 21672 22612 21475 23158 21653 22647 21521 23127 21454 22890 21401 23240 21480 22823 21440 23107 21532 22833 21765 23056 21615 22784 21864 23076 21686 22963 21091 22378 22205 22533 21858 22280 22389 22343 21970 22098 22467 22151 22029 22290 22392 22151 22117 22377 22476 22197 22250 22638 22256 22545 22231 22714 21954 15571 16008 17333 16819 20010 17406 19735 18264 21174 26770 27333 24530 26291 22956 24670 22676 24613 21911 23848 21983 23601 22382 23337 22514 22831 23029 22428 22132 22199 23057 22201 22817 22107 23008 22209 22705 22272 22225 22640 22279 22505 22096 22792 22196 22352 22443 22635 22310 22443 22465 22043 22821 21956 22509 21725 23008 21674 22908 21650 23061 21751 22859 21773 23028 21849 22635 21845 22306 22394 22312 22163 22500 22238 22732 21646 22727 21506 23047 21675 22841 21948 22631 22231 22381 21901 22269 22376 22221 22180 22568 22064 22779 21871 22588 21664 23028 21668 22867 21932 22857 21890 22626 21701 22541 22161 22442 22055 22307 22445 22295 22234 22584 21609 23107 21595 22680 21647 22962 21828 22768 21865 22551 22301 22324 22076 22263 22669 22241 22283 22489 21838 23040 21350 22710 21150 23856 21483 22744 22037 22333 22679 21736 22031 21338 23584 21184 22880 21912 22677 22756 21509 22347 21218 23673 21469 22855 21726 21777 23521 21351 22583 21987 22630 22114 22422 22167 21899 22687 21988 22505 22135 21854 22901 21788 22711 22027 22560 22202 22263 22164 22094 22557 22596 21921 22656 21860 22710 22209 22307 21967 22037 18307 18999 19529 20120 19802 21275 19911 21416 20464 21053 24860 23891 23437 23463 22832 23615 22048 23224 22192 23381 22314 22801 22104 22446 22451 22867 21744 22863 21577 23155 21927 22856 21903 22455 22521 22640 21984 22602 21704 23095 21959 22448 22141 22626 22016 23025 21559 22992 21659 22943 22176 22237 22138 22484 22460 22453 22025 22604 21832 22727 22407 22201 22221 22369 21895 22983 21623 22809 21864 22757 22467 22176 22244 22371 21299 23105 22032 22554 22033 21437 23259 21929 21918 22375 21121 23561 22041 22004 22464 21605 22705 23157 21047 22945 21497 22597 22825 21236 22635 21808 21703 23621 20860 22660 22056 21460 23475 22074 21929 22073 21925 22599 22550 21972 22536 21623 22637 22272 22088 22361 22229 22603 22347 22045 22451 21977 22870 22187 22228 22069 22436 22263 22993 21504 22711 22068 22088 22445 22165 22225 22294 21664 22976 21652 22842 22008 22173 22256 22834 21675 22712 21895 22834 22135 22266 22087 22233 21532 23230 21450 22775 21737 22131 22383 22470 21841 22528 21637 22989 21987 22309 22137 22512 21775 23153 21600 22872 21765 22272 22388 22650 21701 22600 21554 23008 22033 22231 22040 23018 21778 23080 21465 23011 21647 22191 22189 22917 21464 22812 21865 22284 22387 22072 21969 22584 21799 22893 22149 22129 22173 21736 21806 22891 21628 22800 21788 22133 22421 22407 21737 22933 21907 21936 22675 22228 22081 22613 21203 22915 22866 21254 22779 21963 20939 23749 21717 21343 22864 21920 21223 23829 21360 21961 22512 21865 21914 23670 20791 22826 21940 21473 22992 22842 21010 22762 21941 21371 22716 23380 21409 22393 22149 21664 22925 22341 21959 22369 22298 21650 22573 22785 22045 22188 22568 21916 22321 22535 22186 22118 22565 21777 22728 22323 22090 22229 22439 21956 22455 22411 21993 22269 22472 21576 23045 22153 22195 22247 22112 21681 23044 21826 22539 22065 22211 21651 23049 21552 22525 21829 22329 21879 23168 21763 22421 22004 22700 21708 23063 21636 22406 22069 22294 21917 23157 21599 22665 21881 22512 21553 23165 21710 22488 21984 22600 21709 23031 21832 22452 22008 22766 21479 23085 21658 22362 22123 22613 21553 22871 22384 22221 21921 22547 21787 22368 22406 22354 21803 22752 21671 22233 22415 22423 21640 22745 21824 22172 22087 22989 21571 22648 22043 22532 21375 22986 22276 21846 22408 22175 20954 23016 22917 21200 21498 23056 21815 21411 23284 22771 21049 23030 21763 21388 22775 23359 20804 22435 21985 21443 21551 23563 22414 21203 22825 22057 21081 22956 23350 21269 22029 22611 2232 6449 9859 10133 11927 12711 13438 13542 14951 14380 34380 32096 30023 28298 27712 27077 25947 25172 25511 24545 24466 24144 24739 23345 23756 23587 23688 7630 11359 12994 13956 14934 16214 15889 16884 17171 35250 31784 30147 28672 27569 25931 26088 25604 25218 24027 24901 23919 24153 22997 24483 23503 23545 22976 12791 14135 15689 16840 17927 17184 18810 18536 18936 31040 30272 27856 26648 25424 25924 24741 24529 24112 24921 23396 23485 23386 23812 22800 23353 23221 15369 15392 17755 18133 19160 18721 19923 20009 20928 19435 28790 26519 26035 24343 24950 24249 24354 22939 24134 23105 23497 22560 23717 23287 23062 22403 23500 18233 19776 19710 21267 20773 20787 20683 21760 20905 21429 24704 25130 24088 23552 22911 23849 22905 22951 21848 23808 23703 22344 21803 23619 22567 22219 21872 23746 23772 22122 21269 23109 23143 22435 21491 22258 23580 23215 21202 22023 22876 22873 21733 21741 22486 24071 22816 21354 22129 23330 22124 22101 21337 22952 23712 22759 21865 22424 22756 22172 22367 22008 23064 22673 22450 21878 22716 22263 21901 22050 22432 22806 22533 21800 22582 22450 22427 22199 22549 22718 22704 21666 22672 22347 22455 21883 22293 22716 22912 21741 22543 22339 22716 22037 22380 22280 23174 22037 22131 22233 22823 22040 22389 21722 23137 22446 22354 21872 22967 21936 22628 21589 23099 22355 22673 21561 22855 22093 22641 21733 22464 22429 22884 21588 22569 22189 22452 21998 22365 22375 23188 21633 22404 22258 22706 21677 22400 22074 23323 21905 22319 21959 22885 22055 22400 21687 22778 22535 22737 21717 22694 22174 22615 21551 22705 22400 23074 21493 22707 22137 22607 21852 22307 22231 23223 21873 22240 22296 22608 21956 22328 22446 22944 21753 22402 22363 22633 21806 22297 21998 23099 22139 22152 22107 22865 21892 22274 21770 22967 22484 22615 21593 22741 22208 21863 21369 22765 22657 22836 21463 22096 22492 22284 21575 21543 22967 23668 21655 21211 22275 23143 21650 21392 21782 23774 23349 21920 20936 21928 22835 22453 21580 21491 22423 23831 22137 21232 22375 22771 22009 21372 21848 23808 22817 21219 20984 22919 22295 22008 21061 22769 23628 22224 20946 22599 22577 21968 22195 21827 22968 22491 22155 21624 22632 22287 22228 21784 22269 22575 22767 22043 21956 22309 22667 22091 22217 21812 22289 22803 22711 21763 22307 22194 22599 21479 21975 22023 22785 22566 22295 21685 22588 22183 22405 21689 22315 22467 23047 21783 22203 21792 22899 21965 22401 21683 22810 22388 22720 21527 22631 22201 22394 21870 22197 22063 23143 22086 22156 21907 22851 21948 22622 21490 22898 22301 22573 21407 22743 22167 22528 22221 22245 21989 22933 22225 22258 21856 22756 21844 22681 21689 22880 22439 22792 21431 22437 22120 22713 22031 22266 21709 23012 21966 22419 21408 22789 21947 22491 21888 22137 22231 23113 22145 22286 21741 22787 22024 22535 21693 22295 22231 23155 21968 22310 21633 22855 22065 22544 21897 22162 22064 23011 22205 22343 21802 22849 22057 22452 21830 22307 22464 22914 21875 22220 22038 22837 21933 22311 21685 22336 22295 22969 21857 22068 22093 22820 21833 22454 21560 5605 8389 10437 10871 13084 13328 14115 14144 14112 35691 34621 32040 29227 26695 26887 11138 13549 14210 15014 15848 18629 18499 17362 16827 35959 33340 30389 28509 26985 27133 15284 16815 17432 16540 17963 19517 19592 19118 18929 19616 32481 30684 28755 26112 24992 17004 18735 18714 19562 19570 19673 20133 21656 21893 21062 28782 26986 26752 25672 25209 24442 20653 20679 21636 22011 22285 21706 21589 21688 22272 26103 25201 24490 24281 23608 24291 24069 24136 23025 23104 23226 23686 22962 23482 22451 23042 23246 23608 22789 22700 22279 23123 22936 22994 22416 22687 22415 23553 22872 23129 22091 22599 22352 23222 22430 22855 22100 22593 22599 23383 22477 22532 21984 23194 22273 22686 22005 22605 22077 23328 22605 22939 21676 22593 22218 23141 22101 22804 21730 22771 22614 23303 22437 22594 21857 22836 22247 22775 22188 22467 21872 23370 22334 22918 21559 22382 22144 22941 22000 22711 21592 22734 22629 23052 21730 22343 22041 22981 22084 22564 21735 22694 22345 23139 21979 22265 21858 23094 21923 23083 21673 22688 22564 23315 22119 22403 21888 22775 22162 22446 21865 22293 22264 23180 22234 
