# Supplementary material for: An Active Feature Selection Strategy for DWT in Artificial Taste
Source: Hindawi journal article supplement (doi:10.1155/2018/9709505), 2018-01-01
Supplement: f1 [file 9709505.f1.zip › blackTea-med-3.txt]

43464 43484 43489 43479 49 11943 18346 20024 21067 21285 22130 22024 22682 22512 22899 22504 22680 22538 23143 22394 22553 22304 22741 22596 23193 22970 23559 22982 23495 22816 23089 22459 22805 22370 23048 22608 23357 22784 23396 22888 23376 22789 23237 22533 23152 22969 23349 22335 23082 22190 23061 22374 23237 22759 23655 22806 23524 23021 23631 23077 23687 23036 23655 22764 23511 22637 23269 22434 22959 22363 22977 22429 22863 22439 23253 22566 23324 22612 23495 22777 23531 22646 23168 22506 23221 22553 23117 22642 23072 22543 23232 22284 23204 22644 23176 22549 22932 22950 23063 22712 23075 22477 22892 22272 22704 22313 22473 22048 22306 22113 22501 22230 22644 21991 22215 22030 22285 22145 22585 22262 22895 22599 22957 22856 22951 22741 22999 23142 23599 23680 23890 23824 24079 24005 24080 24074 23415 23527 23211 23575 23173 23495 23185 23533 23232 23450 23267 23562 23177 23492 23183 23432 23248 23477 23150 23613 23105 23632 23125 23520 23164 23564 23067 23642 23045 23644 23079 23552 22939 23520 23004 23585 23063 23633 23016 23621 22971 23712 22992 23744 22916 23680 22903 23703 11045 17572 18429 19809 19510 20312 19861 20583 20003 20600 29584 26448 24564 24802 23753 24202 23471 24059 23180 23864 23212 23750 23093 23602 23029 23623 22797 23512 22663 23612 23010 23561 22853 23504 22925 23400 22712 23145 22763 23028 22616 22995 22585 22956 22441 22935 22384 22904 22431 22979 22444 22940 22454 22916 22855 23137 22989 23195 23223 23616 23353 23719 23732 24015 23645 24055 23976 24332 23946 24314 23936 24289 23979 24208 24040 24181 24019 24236 24058 24052 23912 24064 23959 24093 24081 24204 23929 24049 24084 23884 23616 23165 23473 23069 23492 23152 23408 22949 23209 22829 23009 22813 22871 22733 23128 22856 23104 22711 23136 22528 23054 22504 23019 22295 22856 22456 22857 22360 22828 22540 22913 22316 22964 22375 22999 22407 22976 22500 23129 22581 23424 22764 23503 22835 23463 22844 23535 22720 23472 22743 23424 22726 23464 22824 23372 22753 23372 22835 23406 22792 23377 22785 23477 22804 23411 22702 23338 22551 23396 22780 23336 22657 23307 22577 23055 22528 23169 22420 23169 22536 23328 22519 23042 22316 23046 22260 22990 22248 22936 22330 22912 22540 23171 22760 23349 23016 23449 22896 23462 23021 23662 23161 18295 19889 21101 21010 21612 21271 21740 21305 21764 31892 25846 23850 23543 22894 22702 22176 22682 22182 22346 22004 22290 22199 22230 21997 22036 21897 22209 21943 22127 21919 22122 21984 22075 22032 22634 22753 23078 22873 23226 23362 23644 23484 23554 23392 23048 23188 22775 23159 22728 23104 22720 22950 22801 22816 22636 22905 22690 22741 22441 22834 22866 23217 22935 23622 23070 23569 23081 23456 22897 23079 22773 23265 22665 22913 22493 22844 22359 22856 22457 23049 22636 23372 22826 23383 22821 23473 22825 23438 22790 23343 22595 23248 22584 23155 22416 23164 21987 22954 22467 23145 22540 23104 22477 23134 22433 23005 22311 23040 22376 22891 22311 23008 22193 22987 22287 23034 22410 23290 22757 23402 22966 23603 23034 23576 22871 23698 22919 23704 22902 23636 22854 23372 22768 23316 22777 23138 22536 22942 22410 22873 22370 22777 22467 23027 22720 23136 22885 23413 22952 23319 22879 23332 22843 23376 22944 23277 22791 23248 22804 22897 22514 22634 22633 22569 22296 22720 22288 22491 22137 22294 22272 22504 22058 22094 22060 22109 22057 22167 22081 22423 22598 22913 22299 22457 22470 22875 22848 23210 23408 23696 23518 17260 21004 21385 21993 21688 21943 21543 21792 21660 21857 25424 23936 23108 23116 22913 23275 22945 23304 23017 23552 23016 23316 22904 23120 22817 23170 22637 23097 22577 23479 22729 23081 22379 22934 22354 23080 22700 23111 22708 23296 22863 23649 23040 23608 22912 23417 22584 23149 22221 22873 22277 22999 22529 23202 22679 23443 22808 23334 22716 23250 22549 23150 22453 23127 22850 23328 22336 23049 22183 22912 22258 23320 22651 23483 23105 23517 22961 23405 22732 23302 22501 23093 22301 22863 22272 23191 22635 23286 22899 23336 22567 23131 22545 22967 22702 23143 22650 22996 22417 22806 22380 23041 22903 23497 23055 23514 23044 23381 22848 23096 22374 22692 22378 22502 22352 22848 22837 23418 23316 23185 22757 22706 22258 22476 22272 22105 22036 22541 22384 22900 23141 23875 23922 24151 23861 23541 22912 22674 22025 21980 21821 21880 21710 22216 22617 23003 23207 23529 23381 22937 23080 22712 22984 21947 23009 22467 22754 22437 22754 22728 23181 22980 23310 23149 23353 23064 23170 22553 22903 22258 22839 22336 22903 22608 23203 22859 23390 22710 23266 22581 23030 22517 23035 22327 23120 22380 22929 22347 22901 22607 23430 22912 21708 21788 22496 21969 22592 21728 22460 21669 22519 26217 24249 23168 23581 22890 23458 22759 23299 22529 23138 22651 23464 22551 23175 22336 23049 22274 22972 22291 22992 22189 22982 22400 23098 22625 23223 22877 23564 23056 23558 22995 23592 23032 23597 22765 23528 22705 23232 22496 23032 22448 22855 22272 22745 22215 22806 22439 23079 22657 23160 22903 23278 22869 23346 22915 23346 22886 23176 22722 23089 22536 22956 22573 22944 22599 22838 22495 22820 22415 22682 22229 22288 21872 22088 21949 22343 22373 22337 22261 22881 23117 23541 23584 23920 23896 23954 23849 23876 23438 23597 23314 23026 22351 22512 22721 22570 22128 21998 21842 21805 22539 22734 23048 22807 23244 22877 23181 22890 23159 22796 23099 22912 23015 22686 22876 22596 23352 22545 22785 22530 22700 22352 22799 22272 22885 22498 23160 22807 23351 23056 23488 23063 23520 22863 23502 22904 23383 22720 23116 22608 23328 22835 23324 22656 23221 22421 23040 22432 23025 22232 22856 22134 22919 22135 22908 22391 23063 22405 23081 22500 23224 22805 23328 22802 23441 22732 23414 22618 23405 22633 23396 22728 23373 22731 23383 22754 23464 22649 23417 22808 23297 22792 21601 22180 22976 22330 23168 22380 23136 22496 23200 22469 24024 22976 23529 22953 23368 22848 23316 22749 23176 22881 23288 22720 23211 22728 23288 22825 23427 22889 23216 22889 23276 22764 23296 22796 23161 22834 23242 22752 23390 23065 23463 23098 23495 23285 23568 23288 23607 23349 23562 23324 23443 23130 23528 22688 22628 22439 22784 22456 22583 22492 22898 22580 22820 22611 22784 22414 22565 22256 22343 21874 21984 21771 21913 21671 21796 22478 22377 22678 22350 22703 22374 22677 22338 22728 22428 22711 22528 22741 22488 22762 22519 22816 22566 22828 22685 23328 22917 23407 22991 23527 23063 23552 23080 23366 23020 23508 22916 23363 22851 23193 22498 23028 22328 22864 22186 22872 22432 23003 22528 22880 22790 23528 22216 23061 22412 23084 22372 23161 22616 23424 22665 23413 22736 23318 22809 23346 22760 23296 22408 22892 22245 22896 22337 23000 22504 23319 22736 23552 22849 23613 22919 23723 22752 23437 22519 22906 22241 22932 22264 23011 22506 23047 22423 23143 22501 23344 22653 23451 22660 23322 22464 22995 22167 22839 22305 22935 22545 23188 22757 23277 22832 23471 23006 23544 23020 23376 22565 22838 22373 22759 22511 23033 22454 22999 22521 23072 22756 23197 22800 23158 22897 23317 22711 22604 22019 22459 22378 23239 23110 23721 23592 24009 23693 23687 22983 22535 21992 22135 22174 22740 22357 22748 22864 23383 23350 23553 23199 23146 22426 22254 21788 21889 21881 22378 22635 23261 23832 23978 23652 23475 22727 22237 22112 22230 22646 22513 22926 22516 22981 22464 22919 22611 23113 22949 23258 22848 22935 22595 22695 22432 22760 22586 23146 23029 23468 23081 23270 22705 22816 22459 22887 22480 22936 22616 23099 22925 23097 22594 22848 22249 22837 22524 23142 22843 23591 22955 23296 22508 22937 22124 23019 22900 23008 22567 23264 22724 23271 22457 22805 22289 23097 22627 23549 22851 23545 22662 23183 22172 22945 22342 23127 22426 23054 22656 23367 22560 22916 22197 22837 22263 23287 22779 23535 22813 23564 22592 23113 22279 22896 22338 22950 22449 23115 22415 23221 22727 23307 22756 23105 22401 22833 22149 22961 22373 23399 22857 23616 22848 23316 22412 22889 22215 23090 22308 22947 22444 23031 22742 23301 22813 23253 22336 22759 22300 22894 22600 23202 22912 23474 22937 23123 22355 22693 22904 22876 22614 23180 22829 23173 22598 22734 22268 22790 22648 23428 23235 23527 22884 22935 22153 22189 22289 22792 22401 22791 22900 23611 23189 22141 21681 22493 22809 23816 23832 24008 23160 22551 21902 22353 22496 14672 18140 19719 20135 20452 20010 19999 19418 19419 39424 26910 25072 24959 24775 24496 23580 23200 22415 22754 22731 22857 23449 23212 23352 23043 23116 22560 17735 19569 20840 21242 21957 21767 22102 21685 21800 31952 25493 24034 23784 23403 23623 23306 23361 22759 22960 22759 23592 23257 23597 22999 23116 22464 10615 19033 21382 21319 22223 21939 22165 21725 21988 21793 28105 24475 24412 23488 23532 22884 23030 22546 23761 22632 23348 22888 23462 22476 22973 22521 23360 17935 22121 21914 22551 21719 22247 21843 22743 22039 22986 24854 24011 22705 23241 22502 23356 22941 23712 23025 23420 22544 22957 22670 23176 22631 23293 22828 21636 21786 22550 21912 22807 22460 23362 22563 22864 21880 23796 22352 23284 22676 23579 22701 23032 22412 23095 23081 23552 22960 23145 22327 22937 22576 23211 22542 23488 22720 23056 22346 23334 22780 23704 22822 23138 22292 22991 22513 23100 22758 23257 22829 22901 22298 22893 22647 23544 23104 23307 22421 22713 22552 23004 22561 23175 22856 23277 22502 22763 22312 23118 22847 23534 22951 23320 22538 22761 22474 23005 22690 23280 22896 23032 22311 22401 23068 24064 23618 23218 22019 22240 22365 22861 23291 23361 22342 21898 22471 23927 23832 23320 22021 22232 22064 22694 23141 23524 22382 22208 22042 23944 23808 23443 22189 22146 22497 22630 23047 23528 22647 21927 22273 23569 23888 23425 22200 22405 22431 23308 23360 22538 21743 22273 23410 23224 23278 22567 22714 22562 22912 22733 23248 22707 22679 22666 23244 23190 23104 22448 22770 22473 22881 22836 23187 22693 22688 22769 23384 23033 22983 22304 23033 22460 23115 22860 23091 22249 22873 22838 23502 22973 22885 22279 23424 22552 23245 22575 22733 22506 23384 22940 23296 22388 22817 22380 23270 22778 23059 22278 22876 22645 23548 23008 23085 22229 23013 22441 23271 22688 23047 22170 23188 22928 23602 22443 22928 22492 23080 22579 23336 22386 22793 22470 23537 22903 23274 22279 22918 22406 23163 22712 23202 22208 23346 22805 23608 22506 22882 22472 23149 22645 23253 22208 22880 22622 23648 22824 23040 22226 23011 22539 23416 22581 22768 22388 23330 23034 23303 22128 22998 22309 23326 22614 23147 22198 23281 22934 23331 22455 22826 22295 23040 22656 23284 22550 22756 22443 23432 22922 23077 22194 22921 22446 23172 22772 22944 22286 23067 22934 23453 22736 22729 22434 22944 22643 23264 22698 22750 22411 23360 23104 23241 22114 22784 22503 23014 22941 22980 22158 22466 23053 23862 22625 22135 22295 22602 22760 23447 22820 21962 21967 23040 23801 23049 22060 22658 22517 23475 22932 22222 21840 23313 23832 23584 22055 22412 22789 23423 22118 21988 23165 24044 23052 22177 22495 22580 23178 23363 22010 21976 22919 23673 23245 22418 22832 22583 23162 22818 22752 22341 23132 23104 23272 22432 22777 22600 22949 22882 23026 22403 23045 23064 23184 22471 22756 22517 23029 22822 22977 22309 22939 22718 23557 22720 22695 22472 22932 22812 23111 22328 22837 22913 23584 22661 22777 22517 23063 22765 23216 22401 22828 22453 23573 22790 22992 22250 22978 22484 23416 22393 22896 22584 23522 22741 22992 22336 6951 17007 19395 19008 20060 20085 21020 20270 20519 20080 31207 25538 24976 23450 23589 23258 18773 19993 21164 20845 21804 21287 22189 21368 21817 32552 26421 24137 23629 23341 23552 17885 21284 21033 22128 21917 22912 21620 22370 21813 22585 25374 24170 22839 23753 23369 17973 21001 22060 21959 22901 22168 22324 22256 23010 22569 25175 23392 23525 23079 23484 22584 22034 22503 23189 22235 22775 22365 23088 22363 22621 25088 24016 22624 22996 22795 23371 22981 22283 22804 24102 23671 22236 22496 22833 23286 23077 21824 22538 23672 23981 22677 22208 22921 23096 23266 22281 22089 23636 23867 22771 22201 22630 23144 23115 21888 22946 23930 23559 22079 22404 22518 23518 22932 21798 23016 23105 23302 22328 22843 22760 23104 22373 23028 23151 23200 22505 22834 22706 23156 22634 22784 23152 23120 22299 23151 22823 23164 22279 22977 22983 23366 22442 22917 22612 23213 22541 22809 22899 23411 22266 23033 22551 23321 22357 23048 22976 23335 22181 23123 22469 23361 22535 22828 22592 23546 22374 23135 22370 23353 22593 22856 22632 23555 22484 23000 22416 23308 22482 22903 22787 23488 22144 22814 22536 
23025 20967 22039 20761 23262 20997 22592 20967 22912 21377 22459 21474 22316 21336 21521 22726 21469 22173 21469 22717 21385 22327 21692 22249 21717 21849 22258 21647 22112 21795 22150 21882 21685 22400 21369 22373 21475 21897 22432 21920 21962 21248 21400 20954 21235 21112 21680 21787 22401 22275 22528 22046 22131 21565 21707 21715 21698 21545 21780 21196 21645 21239 21324 21071 21107 20902 21167 21298 21952 22467 22731 22439 22209 22579 22171 22567 22172 22452 22230 22251 21837 21769 21521 21784 21633 21770 21476 21977 21376 21929 21669 22010 21696 22155 21737 22235 21609 22088 21552 22312 21761 22442 21814 22544 21942 22475 21944 22455 22007 22440 21848 22513 21707 22519 21765 22560 21721 22448 21792 22412 21728 22320 21703 22304 21656 22423 21574 22311 21527 22301 21552 22188 21542 22691 21280 22100 21868 21972 20960 22294 20798 22708 21228 22592 21632 22119 21616 22281 21542 22261 21480 22217 21200 22114 21584 22082 21685 22324 21678 22391 21597 22250 21554 22162 21352 22384 21607 22256 21728 22158 21621 22137 21722 22066 21142 21877 21510 21624 21468 22149 21453 21866 21369 21713 761 5763 8665 9965 10483 11510 11781 12238 12375 12899 32343 28421 25895 24560 23452 22935 22390 22422 21965 22003 22339 21952 22152 21770 22037 21724 21989 21844 21996 21733 21997 21667 21898 21709 21917 21645 21939 21735 21977 21872 22230 21720 22263 21985 22299 21919 22389 22041 22441 21904 22369 21984 22471 21907 21959 21398 22048 21397 22165 21378 22032 21424 22090 21412 22048 21369 22312 21638 21961 21450 22135 21489 22320 21489 22298 21469 22200 21533 22254 21592 22241 21553 22544 21319 22378 21454 22091 21661 22167 21274 21866 21608 22134 21520 21984 21372 22196 21206 22040 21357 22012 21329 22215 21607 22018 21369 22064 21464 21941 21651 22230 21524 22232 21900 22379 21795 22393 22036 22647 22168 22523 22167 22629 22125 22675 22208 22672 22254 22920 22617 22955 22704 22929 22386 22727 22298 22711 22448 22965 22420 22505 22337 22705 22417 22681 22855 23239 22914 23127 22800 23086 22658 22621 22231 22224 21744 21822 21364 22020 21664 21850 21223 21192 21792 21520 21755 21464 21938 21499 21917 21835 22074 22026 22168 21979 22313 22065 22275 22031 22245 21844 22268 21809 22151 21710 22118 21767 22057 21836 21949 21719 57 8733 12520 13484 14919 14843 15781 15693 16357 16233 34981 28701 26519 24467 24256 23210 23567 22445 22945 22307 22891 21993 22673 21967 22727 22089 22745 21980 22595 21959 22662 21989 22779 22245 22855 22132 22880 22067 22832 21974 22710 21767 22588 21559 22345 21447 22118 21409 21997 21329 22147 21459 22413 21670 22315 21608 22618 21901 22521 21781 22498 21641 22336 21590 22117 21918 22123 21490 22016 21411 22007 21317 21843 21502 22208 21766 22348 21926 22448 22125 22626 22241 22648 22297 22599 22103 22388 22114 22515 21847 21784 21159 21211 20707 21032 20887 21149 21111 21527 21219 21289 21004 21369 21406 21801 21669 22207 22176 22272 22179 22565 22346 22648 22362 22533 22370 22453 22371 22016 22068 21773 22041 21669 22086 21587 21986 21673 22215 22025 21922 21605 21675 21436 21687 21527 21696 21485 21940 21650 22152 21837 22407 22021 22427 22251 22634 22177 22484 21899 22562 21775 22324 21667 22169 21795 22366 21616 22039 21517 21955 21365 21941 21441 22152 21543 22419 21696 22390 21729 22389 21842 22341 21793 22424 21815 22420 21861 22528 21741 22455 21652 22393 21509 22473 21629 22373 21524 22275 21520 22242 21596 22039 10022 14752 15697 17325 16984 18474 18071 19078 18192 19249 28781 26224 24118 24108 22982 23272 22494 22889 22306 22624 21902 22293 21505 21963 21496 21875 21353 21946 21483 22085 21732 22251 21866 22418 21948 22254 21989 22215 21864 22237 21617 21904 21646 21529 20887 21210 20860 21537 21717 22235 22489 23088 22989 23265 22791 22759 22290 21982 21346 21445 20897 21155 20847 21126 21152 21604 21661 22226 22359 22496 22164 22065 22004 21731 21913 21539 21983 21451 21688 21497 21883 21767 22066 22067 22505 22316 22413 22141 22269 21691 21849 21377 21901 21581 22021 21607 22111 21792 22283 21952 22349 21675 22088 21580 21904 21333 21953 21346 21920 21392 22272 21680 22349 21937 22728 22057 22675 21847 22245 21432 22009 21266 22120 21523 22435 21741 22364 21670 22265 21623 22224 21571 22583 21623 22025 21364 21961 21460 22336 21780 22760 21735 22769 22009 22713 22011 22485 21762 22125 21565 21950 21284 22055 21367 22350 21715 22553 21765 22470 21688 22159 21526 22134 21868 22263 21274 21893 21429 22213 21980 22344 22003 22615 22186 22537 21788 22217 21600 22049 21352 21813 21396 21866 21500 22161 21830 22492 21849 22424 21808 22083 10830 16561 17438 18301 18512 19084 19363 20463 20498 21481 29382 26072 24283 23425 22344 21895 21704 21319 20976 21281 21189 21549 21491 21972 21900 22379 22360 22559 22416 22563 22325 22576 22346 22339 22086 21816 22072 21691 22071 22051 21942 21730 21925 21785 21768 21626 21719 21504 21656 21745 22017 21952 22335 21933 22418 22135 22597 22023 22614 22257 22375 22196 22516 21844 22404 21694 22215 21616 21952 21251 21943 21337 21953 21440 21863 21456 21973 21569 22180 21618 22433 21765 22550 21767 22495 21703 22279 21692 22350 21575 22179 21509 22005 21569 22060 21618 22119 21356 21918 21171 22033 21206 22304 21331 22071 21601 22248 21831 22410 21863 22592 22136 22657 21968 22477 21751 22576 21437 22190 21204 22193 21415 21995 21173 22054 21412 22107 21610 22321 21859 22425 21837 22480 21829 22279 21828 22226 21593 22085 21257 22107 21686 22182 21521 21837 21361 21943 21290 21875 21075 21600 21079 21520 20856 21253 20972 21484 21189 21778 21547 22175 22068 22495 22473 23025 22913 23065 22818 23237 22886 23065 22777 22761 22147 22772 22567 22868 22571 22867 22662 22870 22561 22781 22631 22556 22166 22358 22528 21984 22283 21803 22381 18445 20494 20770 21179 21130 21399 21286 21464 21299 26893 23791 23125 22536 22552 22133 22336 21856 22240 21671 22056 21546 22125 21595 22029 21870 22237 21731 22237 21641 22236 21597 22123 21641 22121 21568 22160 21774 22341 21769 22255 21768 22389 21670 22233 21655 22395 21700 22530 21696 22574 21832 22562 21859 22657 22002 22695 21968 22715 22029 22536 22043 22596 21882 22702 22025 22775 21971 22793 22030 22528 21903 22565 21837 22460 21872 22517 21768 22439 21975 22599 21768 22744 21579 22327 21629 22394 21559 22187 21470 22327 21472 22132 21431 22077 21223 21812 21303 21849 21427 22137 21497 21817 21518 22036 21581 22106 21504 22153 21598 22220 21806 22310 21769 22377 21899 22421 21626 22040 21605 21875 21442 21517 21267 21376 20891 21000 20787 21144 21735 22240 22062 22469 22305 22680 22639 22984 22789 23254 22945 23110 22026 21747 21156 21285 21006 21080 20956 21391 21331 21533 21168 21549 21451 22018 21978 22455 22382 22139 22055 21767 21975 21463 21779 21477 21872 21785 22231 22157 22313 22293 22439 22208 22212 22071 22096 21784 21929 21417 21673 21399 21669 21458 22127 21038 21959 21639 22183 21879 22355 21920 22149 21705 21938 21372 21901 21403 21975 21517 22297 21768 22480 21943 22683 22047 22455 21699 22137 21360 21876 21315 22067 21191 22141 21454 22277 21504 22453 21707 22407 21485 21973 21328 21968 21597 22275 21722 22534 22003 22648 21965 22599 21807 22329 21472 21994 21106 22183 21052 22152 21481 22327 21716 22343 21873 22283 21792 22232 21540 22054 21241 21984 21220 22135 21703 22560 21912 22755 21949 22542 21651 22241 21337 21864 21311 22119 21544 22044 21693 22376 21741 22096 21386 21750 21376 22115 21912 22495 22085 22500 21840 22167 21493 21924 21398 22040 21520 22167 21808 22327 21970 22123 21425 21581 21424 22153 22568 23064 22832 22387 21185 21201 20861 21459 21256 21610 21622 22391 22296 22260 21323 21178 20769 21144 21553 22311 22951 23122 22494 22233 21174 21051 20928 21584 21408 21768 21818 22326 22263 22567 22021 21752 21014 20965 21016 21408 22145 22039 22427 22182 22673 22139 22224 21827 21824 21478 21817 21504 21906 21865 22225 22109 22304 21934 22049 21570 21761 21463 22061 21976 22407 22278 22360 21838 22178 21424 21841 21229 21937 21508 21997 21804 22285 21860 21731 21399 21888 21485 22499 21989 22600 22052 22291 21543 21856 21368 22104 21590 22061 21579 22444 21835 22288 21485 21943 21159 22101 21650 22551 21989 22506 21319 21883 21256 22265 21459 22183 21614 22412 21750 22107 3880 9302 10829 12824 13051 14406 14073 15109 14589 40142 31085 27820 24935 24598 23177 23419 22598 23127 22089 22463 21639 22275 21769 22609 22183 22777 67 9961 12963 15349 15108 16891 16600 17601 17013 18000 35031 29697 25722 24704 23130 23477 22848 23386 22638 22976 21703 22317 21907 22317 21800 22568 22072 7445 13153 16157 16985 18270 18615 19507 19305 19662 18869 30784 26226 24419 23354 23239 22578 23031 22164 22292 21632 22368 22295 23001 22625 22566 21357 21335 12961 16640 18346 19854 20117 20549 19839 19614 19567 20701 27658 25792 24186 23360 21937 21739 21390 21824 21691 22137 22464 22337 21290 21241 21223 22152 22713 19456 20898 21061 20500 20376 20166 21059 20977 21817 27168 24029 22138 21577 21597 22921 23301 22755 22081 21495 22107 21613 22105 21890 22479 21975 22016 21452 21924 22092 22519 22382 21947 21459 21827 21972 21979 22012 22301 21888 21740 21566 22039 21975 22489 22080 22469 21631 21767 21507 21991 21826 22311 22068 22084 21562 21736 21735 22461 22025 22560 22001 22183 21356 22000 21441 22192 21613 22272 21923 22231 21414 21936 21576 22464 22195 22610 21632 21829 21453 22134 21603 22332 21814 22001 21346 22342 21854 22745 21845 22023 21373 22125 21461 22429 21728 22083 21303 22156 21916 22688 21992 21806 21512 22137 21456 22449 21782 22235 21227 22199 21884 22718 21899 22254 21178 22568 21536 22414 21579 21969 21516 22551 21912 22458 21505 21792 21435 22072 21639 22473 21555 21901 21461 22481 22057 22395 21189 22109 21386 22389 21625 22392 21282 21948 21479 22621 21937 22312 21235 21987 21589 22268 21848 22208 21261 22087 21956 22561 22007 21948 21472 22301 21671 22367 21809 21990 21281 22406 22009 22353 21376 21905 21042 22109 21840 22339 21305 22214 22000 22682 21926 21748 21064 21951 21686 22403 21984 21736 20715 21959 22459 23202 22441 21126 21292 21730 22016 22439 21372 20903 21732 22886 22946 22185 20936 21390 21399 22055 22371 21751 20875 21602 22547 23161 21479 21170 21306 21665 21902 22485 21142 21157 22105 23151 22536 21520 20795 21778 21639 22414 21735 20864 21831 21975 22352 22127 21807 21361 21460 21777 22167 21889 21741 21603 22387 22272 22059 21540 22272 21704 22151 22005 21834 21335 21965 22165 22532 22039 21847 21593 22051 21760 22441 21511 21865 21715 22424 22188 22066 21485 21835 21585 22215 21901 22165 21392 21962 21799 22696 21829 21988 21405 21661 21585 22208 21667 21895 21366 22330 21980 22482 21619 21820 21415 22227 21771 22361 21220 22055 21652 22756 21783 22229 21095 22312 21696 22399 21527 21876 21608 22609 21963 22267 21280 21899 21473 22377 21610 22106 21799 22748 21522 21927 21288 22173 21760 22307 21131 22263 21920 22592 21534 21805 21437 22090 21827 22269 21268 22151 22037 22568 21445 21948 21472 22215 21657 22263 21312 22052 21641 22711 21617 21935 21768 22114 21710 22300 21440 21984 21856 22553 21797 21940 21466 21952 21562 22264 21747 21781 21633 22609 22029 21959 21394 22053 21702 22308 21657 21867 21736 22592 21996 22139 20997 21880 21611 22393 21747 21262 21209 22791 22741 21885 20736 21442 21597 22599 21493 377 7239 11895 12966 12665 13057 13845 14583 15712 15150 34025 28873 27638 25793 23863 22514 9883 14208 16451 15934 16320 17249 18873 18924 17792 34609 29319 26607 24997 23937 22884 11831 16087 18041 17873 18834 18977 19631 19581 19462 35200 28942 25937 24279 23099 22729 13545 17874 18836 19719 20285 21003 20452 20439 20332 20829 27253 24793 23222 23239 22880 17624 19187 20384 20645 21571 20856 21237 21284 21885 20944 25355 23226 23245 22429 22403 21957 23085 22243 22253 21619 22455 21986 22376 21367 22454 22080 22681 21472 22153 21525 22421 21879 22192 21569 22701 22115 22321 21393 22286 21699 22519 21272 22225 22052 22678 21376 22141 21555 22514 21678 21885 21843 22662 21909 21900 21584 22235 21814 22041 21548 22903 21716 21994 21487 22176 21893 22227 21264 22508 22108 22185 21453 22296 21826 21988 21562 22624 21969 22082 21581 22047 21808 22121 21324 22377 22124 22139 21376 22061 21804 22032 21339 22472 21991 21911 21559 22221 21919 22000 21410 22604 22631 22085 20749 21919 22250 21827 20816 22403 22903 22082 20923 21601 22144 21985 20891 22345 22923 21749 21167 21764 22325 21191 21163 
21221 22117 21208 22176 20944 22111 21454 21963 21281 21824 21666 21649 21447 21486 21816 21549 21714 21561 21792 22077 21554 22059 21240 21929 21107 22356 21216 22069 21378 21879 21296 21455 21760 21554 21673 21867 21363 21876 21142 22258 21301 22019 21394 21859 21360 21544 21898 21728 21789 21706 21648 21664 21179 22157 21167 22093 21132 22011 21347 21707 22080 21303 21765 21152 22295 21396 21728 21903 21168 21808 20531 22973 21043 22208 21477 21911 21031 21638 21008 21835 21347 22056 21717 22368 21664 22182 21863 22094 21872 22280 21908 22243 21856 22193 21698 22147 21887 22372 21896 22229 21853 22137 21828 22077 21682 21936 21554 21671 21088 21336 20922 20996 20634 21329 21248 21264 21145 21207 20791 20947 20539 20793 20519 20702 20589 20728 20546 20813 20634 20957 20770 21014 21001 21341 21174 21629 21753 21684 21584 21485 21648 21648 21637 21525 21728 21907 21799 21691 21821 21683 21735 21552 21616 21624 21824 21598 21888 21529 21866 21609 21808 21688 21899 21551 21780 21476 21831 21261 21494 21233 21488 21223 21563 21328 21753 21350 21639 21376 21897 21376 21824 21319 21760 21376 13763 16027 17680 18080 18829 18631 19307 19120 19564 33990 25839 23262 22924 22016 22422 21864 22114 21632 22165 21609 22075 21572 22076 21666 22088 21536 22089 21633 22048 21672 22081 21587 22161 21605 22020 21477 21969 21558 21846 21450 21768 21444 21714 21329 21797 21392 21773 21333 21729 21313 21675 21392 21669 21469 21973 21724 22006 21795 22248 21989 22189 22124 22177 22092 22224 22097 21660 21232 21569 21126 21685 21291 21504 21490 21560 21320 21860 21769 21531 20887 21229 20877 21307 21313 21553 21760 22173 21949 21987 22195 21899 21868 21755 21885 21738 21912 21772 22009 21700 21888 21777 21702 21669 21753 21800 21927 21603 21805 21741 21848 21472 21863 21306 21794 21405 21623 21434 21666 21465 21634 21384 21742 21354 21742 21096 21828 21646 21597 21402 21733 21197 21557 21125 21499 21166 21572 21159 21570 21082 21573 21104 21569 21136 21513 21112 21667 21210 21536 21079 21521 21222 21612 21140 21711 21275 21832 21335 21872 21376 21893 21495 22071 21685 22000 21895 22317 21808 22281 21773 22387 21749 22208 21686 21956 21642 22016 21474 21816 21219 21772 21216 21527 21131 21534 21111 21405 21271 21580 21228 21651 21303 11857 17860 19540 19664 20331 20093 20484 20320 20646 20232 26816 23367 22770 21975 21911 21336 21722 21623 21634 21372 21600 21336 21554 21156 21449 21139 21283 21286 21519 21217 21386 21015 21569 21669 21280 21160 21293 20870 21153 20816 20984 20744 20967 20992 21591 21483 21785 22040 21900 22108 21945 22093 21912 21911 21978 21956 21817 21705 21649 21573 21332 21327 21205 21450 21318 21671 21616 21904 21813 21964 21741 21925 21615 21814 21591 21632 21401 21570 21402 21817 21482 21722 21155 21536 21167 21658 21239 21513 21275 21650 21479 22023 21692 22221 21718 22240 21840 22284 21797 22325 21781 22247 21853 22117 21754 22136 21641 22017 21661 21984 21390 21768 21312 21973 21313 21696 21185 21594 21147 21529 21122 21688 21297 21739 21324 21640 21337 21975 21419 22145 21577 22064 21707 21952 21636 21945 21565 22032 21580 21687 21342 21764 21333 21022 21383 21589 21239 21464 21176 21431 21184 21766 21287 21852 20981 21324 21184 21891 21632 22349 22382 22827 22649 22896 22584 22596 22533 22652 22203 22119 22390 22624 22326 22071 21711 21703 21260 21400 21010 21100 20631 20865 20497 20999 20778 20721 20483 20647 20487 20493 21269 21425 18090 19983 20708 20745 20887 20669 20814 20797 20935 28979 23624 22259 21868 21287 21755 21338 21538 21257 21480 21244 21512 21584 21859 21935 21864 21787 22055 21826 22240 21826 22080 21771 21922 21497 21664 21161 21453 21209 21387 21138 21550 21415 21959 21682 22087 21615 22001 21372 21708 21316 21773 21685 21675 21211 21489 21128 21648 21341 22006 21649 22139 21797 22127 21844 22249 21703 22183 21507 21808 21296 21573 21027 21601 21212 21628 21589 22112 21573 22078 21584 21940 21446 21792 21280 21828 21255 21601 21184 21550 21409 22090 21773 22298 21839 22238 21834 22240 21773 21931 21322 21595 21097 21492 21248 21794 21536 22113 21744 21969 21629 21832 21500 21787 21342 21575 21003 21276 20793 21397 21943 22468 22642 22999 22557 22455 21538 21010 20528 20832 20524 20864 20876 21441 21685 22312 22225 22210 21769 21539 21167 21271 21152 20863 21345 21174 20935 21069 21006 21551 21848 21850 22099 21924 22170 21873 21889 21531 21624 21357 21365 21223 21413 21307 21688 21815 21915 21724 21868 21404 21731 21291 21704 21394 21488 21335 21429 21316 21888 21644 22005 21933 22204 21972 22204 21850 21924 21624 21647 21252 21477 21190 17273 20173 21312 21056 21527 21133 21498 20914 21436 20852 23906 21815 21785 21339 21856 21660 21900 21704 22187 21855 22189 21881 22167 21694 22081 21437 21928 21223 21792 21272 21660 21179 21560 21079 21571 21114 21639 21201 21783 21445 21989 21450 21929 21559 22176 21660 22100 21587 22024 21510 21769 21395 21792 21352 21753 20794 21901 21256 21706 21240 21599 21088 21485 21265 21553 21275 21628 21491 22048 21799 22248 21933 22326 22053 22519 22328 22739 22608 22848 22468 22400 21815 22240 21614 21361 20810 20818 20808 20878 20503 20841 20495 20833 20951 21457 21352 22176 22184 22407 22164 22328 21985 21992 21895 22178 21626 21573 21293 21399 21257 21543 21748 21482 21495 21306 21504 21334 21569 21703 21954 21735 21736 21929 22087 22005 22152 21932 22010 21810 21940 21632 21649 21472 21688 21261 21515 21240 21390 21369 21721 21575 21825 21596 22058 21713 22097 21735 22001 21660 22018 21736 22091 21704 21977 21571 21961 21457 21856 21425 21797 21251 21814 21299 21787 21236 21634 21273 21692 21229 21706 21261 21604 21185 21665 21106 21604 21062 21705 21034 21591 21095 21574 21139 21469 21174 21661 21148 21641 21157 21655 21312 21434 20118 21157 20864 21411 20843 21476 20957 21474 20836 23968 21762 21744 21134 21521 21137 21556 21290 21796 21476 21769 21480 21885 21497 21895 21148 21573 21201 21777 21302 21690 21381 21778 21382 21794 21393 21770 20993 21363 21008 21272 20716 21040 20905 21185 20776 21093 20918 21047 20769 21069 20782 20905 20776 21282 21076 21263 20937 21432 21100 21280 21108 21212 21013 21237 21072 21296 21017 21235 21227 21399 21168 21387 21234 21429 21520 21443 21581 21443 21559 21432 21546 21416 21623 21521 21584 21527 21607 21682 21787 21597 21691 21598 21744 21591 21969 21815 21907 21761 22049 21670 21816 21446 21664 21472 21689 21283 21593 21211 21464 21111 21470 21223 21671 21336 21818 21730 22177 21853 22200 21861 22204 21927 22283 21863 22280 21840 22249 21731 21776 21175 21585 21218 21453 21145 21592 21201 21625 21216 21854 21285 21699 21538 21953 21592 22028 21577 22203 21584 22073 21509 21856 21280 21691 21036 21531 21153 21783 21513 22103 21862 22245 21934 22144 21735 21960 21217 21669 21129 21638 21225 21746 21815 21765 21337 21753 21461 22000 21649 22103 21719 22116 21665 21935 21416 21625 21199 21561 21341 21777 21536 22169 21833 22289 21842 22272 21754 21856 21488 21671 21159 21462 20935 21672 21492 21649 21545 21933 21920 22293 22093 21977 21213 20963 20469 20736 20828 21454 21929 22581 22738 22744 22144 21946 20992 21024 20787 21025 21073 21431 21169 21370 21252 21689 21912 22228 22443 21696 20928 20763 20471 20928 21066 21543 21925 21708 21978 21888 22112 22080 22216 22029 22039 21576 21345 21320 21536 21424 21595 21443 21552 21616 21875 21888 21985 21671 21537 21226 21482 21300 21913 21848 22225 21963 21827 21448 21357 21306 21652 21383 21725 21527 21949 21829 22016 21575 21622 21193 21571 21296 21943 21913 22213 21765 21895 21216 21504 21430 21735 21362 21947 21627 22118 21568 21784 21113 21576 21310 21917 21677 22264 21860 22140 21767 21692 21276 21745 21545 21681 21351 22001 21709 22101 21507 21808 21061 21536 21136 21719 21504 22054 21777 22283 21728 22135 21442 21565 21164 21597 21421 21715 21292 21815 21324 22060 21708 21882 21345 21693 21067 21754 21431 21988 21733 22281 21910 22295 21625 21672 21216 21472 21292 21707 21319 21837 21611 22084 21745 22003 21453 21466 21216 21689 21608 22197 21952 22064 21435 21606 21244 21883 21420 21802 21505 22080 21780 21735 21120 21170 20809 21460 22025 22752 22504 22980 22201 21664 20806 21104 21188 21705 21874 22445 22115 21609 20725 20659 21000 21900 22455 23011 17212 18295 18256 18611 18497 19098 19137 19919 19273 29596 24685 23712 22744 21833 20894 20727 20677 22279 22693 22936 22293 21843 21421 21322 21596 21602 11128 17875 19535 20056 20599 20456 20541 20343 20291 20295 26770 23744 22855 22390 22021 21522 21517 21415 22152 21412 21936 21655 21618 21324 21429 21277 21826 16065 20008 20533 21004 20611 20627 20689 20899 20870 21309 24755 23021 21816 21714 21316 21683 21568 22161 21856 22107 21363 21408 21178 21861 21262 21901 21765 18909 20193 20816 20576 21259 21248 21904 21566 21649 28768 23088 21729 21930 21431 21981 21667 22151 21367 21575 21157 21799 21799 22176 21877 21982 21308 21568 20103 21189 21067 21635 21340 21998 21057 21303 21052 24336 22298 22459 21921 22011 21013 21879 21280 21795 21675 22021 21373 21577 21159 21937 21697 22384 21589 21932 21073 21704 21397 21879 21649 22081 21305 21536 21239 21958 21861 22196 21664 21721 21185 21524 21256 21760 21430 22058 21443 21560 21137 21697 21635 22173 21826 22026 21421 21540 21270 21750 21381 21895 21675 22065 21393 21587 21065 21675 21615 22168 21920 21959 20937 21178 21432 21548 21650 22348 21396 21211 20595 21612 22428 22957 21889 21148 20823 21485 21185 22453 21891 20928 20552 21540 22467 22913 22152 21297 20708 21346 21026 22344 21797 21195 20538 21440 22183 22951 22317 21417 20801 21429 21171 22037 22156 21096 20431 21421 22736 22496 20928 21103 21140 21369 21929 21847 21543 21225 21520 21797 22123 21929 21585 21301 21736 21560 21858 21888 21401 21216 21627 21923 22075 21856 21552 21313 21403 21571 21895 21558 21413 21283 21923 21965 22179 21420 21463 21357 21634 21604 21993 21373 21410 21409 22118 21975 21833 21328 21633 21378 22004 21735 21699 21054 21723 21772 22023 21320 21440 21383 21751 21516 22100 21456 21488 21271 22065 21888 22237 21371 21564 21428 21745 21673 21950 21178 21577 21583 22235 21651 21703 21280 21916 21344 22002 21646 21542 21049 21804 21907 22181 21325 21576 21417 21866 21536 22034 21230 21645 21605 22357 21684 21633 21273 21770 21504 22148 21319 21472 21271 22197 21922 21800 21172 21889 21400 21955 21653 21715 20993 22026 21674 22390 21328 21570 21244 21797 21701 21733 21064 21670 21606 22304 21783 21730 21241 21552 21415 21941 21600 21539 21120 21926 21883 22130 21253 21597 21667 21772 21667 21984 21267 21501 21448 22192 21850 21724 21238 21652 21254 22029 21612 21715 21007 21841 21960 22310 21576 21309 21336 21575 21690 22264 20781 21017 21708 22853 22500 21650 20768 21313 21165 21782 22333 21460 20931 22528 22726 22104 20887 21184 21120 21917 22106 21363 20451 21733 22647 21564 20907 21361 21745 22403 21136 20804 21665 22918 22276 21196 21056 21283 21881 22375 21621 21155 21729 22016 22123 21447 21504 21510 21754 21895 21655 21248 21628 21913 22027 21671 21366 21687 21611 21885 21576 21275 21674 21937 22153 21583 21417 21494 21723 21613 21954 21281 21388 21488 21973 21796 21465 21377 21629 21572 22004 21323 21393 21557 22272 21741 21581 21371 21729 21400 22098 21473 21598 21299 22120 21881 21911 21239 22160 21445 22057 21397 21596 21297 22234 13583 17869 18539 19377 19442 20080 19451 19704 19677 20433 26562 23665 22112 22213 21712 11031 17660 19623 20024 21064 20553 20717 20131 20805 20557 27576 23245 22485 22007 22432 21875 18144 19664 20765 20691 21415 20445 21141 21024 21799 27760 23479 22059 22282 21813 21878 17894 20610 21155 21408 20659 21459 20983 21701 21171 21112 23124 22823 22108 21792 21431 19264 20821 21653 20848 21696 21650 21818 20955 21521 21404 23131 21478 21837 22070 22542 20903 21697 21288 22279 21504 20788 21974 22968 22077 21084 21108 21557 21993 22220 20548 21037 22240 22780 21220 21145 21104 21968 21784 20921 20973 22512 22428 21266 21146 21376 22208 21441 20520 21739 22688 22232 20829 21176 21607 21879 21614 21144 21752 21981 21492 21381 21584 21853 21596 21285 21700 22018 21788 21335 21551 21757 21631 21273 21933 21993 21530 21382 21644 21620 21893 21285 21654 21961 21856 21245 22075 21465 21920 21053 21922 21851 21816 21220 21738 21616 21780 21225 21928 21911 21908 21068 21860 21403 22018 21193 21807 21867 22064 21095 21666 21442 22082 21193 21671 21801 22133 21149 21475 21516 21952 21121 21969 21820 21851 
40192 39926 40077 40293 37142 39904 42752 38463 40601 36512 34640 34354 42333 43264 36649 33525 35106 33472 35768 39257 33511 38992 40433 37873 39021 42211 40148 39352 41634 37523 40669 42900 35813 33319 34708 37063 41633 37321 39264 41344 41129 38734 41808 37175 41411 33473 37113 35380 36147 35223 34260 34417 39681 40327 39943 39715 39268 38893 41495 35577 39047 41107 35994 39156 41680 41985 35592 37520 39410 36281 32480 38469 38255 40550 42986 37704 38607 40845 41618 38501 35139 34800 35488 38970 38259 35599 40715 35130 35034 38680 37775 43784 36640 39272 39360 41957 43189 38050 38400 35379 34117 40466 35740 35816 33800 42703 43050 37963 42925 36702 41707 38912 33720 40967 40244 40418 39475 40248 35719 37166 32736 35305 32352 34432 33243 34629 32450 35596 33601 37274 35061 37715 37681 41472 39827 34677 35789 34842 33543 42763 34619 34216 34244 32928 35161 37328 36328 35164 36536 34962 35635 33173 33893 34135 36188 34080 36853 33120 36868 34169 36028 34924 37315 33638 35733 42576 36928 40507 43152 40539 42889 40582 33880 40839 36072 41400 34716 41256 37495 41414 36531 41152 35728 41320 33093 36787 32806 37032 35163 32949 40098 38218 32980 33616 38401 41868 38186 38375 42892 37207 39618 34252 40089 34336 39239 33700 39136 34769 39200 33145 39236 34352 38620 34836 39112 33984 39936 34274 38344 42850 38343 33603 36640 42420 35979 42227 35505 41044 36386 41563 36203 41224 35670 40854 35161 41496 35021 42695 38484 35593 38569 36252 41063 38614 40688 40020 40391 39602 40808 39575 34807 40009 33667 38864 35092 40755 32746 42547 33714 40809 37028 35834 33160 36390 40340 36595 41024 41088 33555 35360 40324 38201 38425 40632 37568 37120 36007 37366 35684 37347 35899 38644 35165 36909 35856 35156 34722 35797 36101 37734 34128 36288 35800 36696 42480 37365 40973 36237 42018 34711 42171 34907 42521 34484 41464 36032 41440 36047 38754 36537 34551 34028 41737 35841 39956 33677 38890 43232 39936 33738 39408 33667 38505 33776 38585 33628 38834 32998 38759 34864 39952 33193 38544 33024 40011 34378 39014 35617 40599 36679 41350 37148 41389 37440 43089 39573 35152 38286 37409 41890 36377 41302 36192 42539 36089 40464 35200 37845 34491 38207 42681 36625 40148 36036 39896 33347 39044 33396 38940 42156 40877 33987 40135 34709 40919 33217 34843 32378 33628 41089 39052 31853 40599 33992 39764 38368 42864 36588 38345 37635 41248 35688 34432 34126 41600 34096 41079 33584 39185 42566 39473 40776 40896 33395 39893 41849 38157 33592 34574 40320 39525 41024 36444 39277 35662 37523 34776 37444 37360 34017 42755 36309 38701 37408 39688 38032 39624 37522 37584 38304 37984 36521 35255 34372 33575 40972 41580 40223 42609 41324 35131 34004 37056 36416 38096 35888 37614 34491 36305 33996 33984 41744 33773 41740 36636 42771 35739 39338 33160 39575 34780 40393 33089 40476 34612 42739 38936 35210 40878 35589 40804 36704 41344 36404 41859 36231 41233 37185 39776 36022 39863 34575 38317 34880 38073 41915 35968 40746 38400 40984 35136 39571 34102 39281 33255 38720 35049 40647 35950 41097 34520 41184 38520 42291 40098 33911 38790 35456 37696 34311 37799 33787 38376 33866 34995 41360 35876 41202 38346 41825 34178 40372 42700 39849 42504 39792 35908 40752 37057 37648 41175 39716 37316 34122 42059 42849 37248 35072 37480 34132 34080 33326 34907 40696 40060 42791 34794 41778 39541 35680 35280 40341 41984 37924 38952 33859 35985 31893 37511 35308 34641 31705 33696 31801 31798 40240 42244 37762 37637 34560 34742 36475 34233 35685 35574 37076 40948 35439 41249 37280 40898 36186 41274 33376 40192 42881 40753 32992 33441 36784 37952 36976 36160 39056 36519 40871 36608 39085 36055 37468 43044 34843 39405 42722 40332 42001 39324 33638 41977 38360 34937 39383 34569 38377 41799 35520 40873 36186 34944 34904 40080 42999 39280 34459 41332 38806 34534 40007 36336 40041 36824 41197 35511 40448 32988 35989 40584 33888 37854 34025 39927 34578 33794 39336 33813 39248 33765 37609 42416 36197 40400 36609 40404 34160 39410 33620 41705 39604 36123 41472 37097 41191 36823 40896 36184 37782 41152 34304 38735 42930 40315 36199 32991 39416 35696 38024 34624 36423 43025 36444 41443 34023 37676 40616 35653 41772 38156 43280 35130 38865 34040 43180 33485 37527 32308 35557 32344 35779 36277 42164 35248 41512 41034 40811 36043 33217 39588 40736 39360 36747 41271 39857 37283 38615 37888 33660 36581 36814 39513 37641 40304 37209 37121 33267 34132 41508 41871 40538 42240 41315 35176 36440 37596 35541 37029 41942 35831 40816 35332 41611 42969 41666 42503 41208 37175 34491 38514 37920 40746 38272 40769 37019 37546 34328 34595 40071 42944 40077 38920 39767 40922 38305 33264 39072 43115 36988 42333 36354 38439 36620 36061 41377 36928 34695 37241 35145 40477 37264 40626 37424 40349 35392 39136 42560 37848 40355 36107 40400 34870 39720 33607 38561 33742 38903 34600 39741 36232 42347 38646 42521 37952 33687 39984 34847 39346 33998 38392 32924 35666 41733 36160 41358 36099 35584 37360 40276 35403 40281 34409 38430 43048 40643 33552 40492 34604 42787 38975 36409 41065 38039 41904 39216 44172 42157 36256 34248 36823 43236 42689 36825 40917 34561 41398 35879 35640 35507 36411 32186 35847 32132 35632 37275 42416 41632 40336 40502 42903 40372 41984 38528 38463 37444 40294 34593 33601 40745 42166 40617 33606 35552 42735 43399 41266 32864 41044 33749 35154 37778 35760 35504 37632 39500 38761 40024 37889 38730 36352 37729 34167 34328 42359 35238 40432 33223 40150 42011 41950 35704 33745 36291 33975 38888 35352 39337 35844 38441 34771 38326 35632 39466 35272 38213 33721 37932 42481 36983 42088 36435 40234 36560 40838 36346 40290 34424 40453 35304 40344 35415 40448 34188 39536 34785 38755 34119 38259 35325 38005 34090 38773 33784 39060 42902 39920 34968 39248 34546 39326 34823 40704 42486 39171 39541 36116 41960 36397 42612 37687 42648 36153 38976 35742 35515 39186 33040 38916 33504 40569 36246 42603 36091 42656 37655 43048 37634 39377 33815 39697 35975 40838 35257 41560 36041 41600 36247 41659 36039 37424 41621 37767 40472 34904 37861 36749 39624 35277 38693 36944 38336 35136 38512 35512 36657 35174 40475 38636 40725 37280 42192 39128 40538 39055 40193 37976 40466 38512 40721 38072 40429 40519 42144 39625 41968 40489 42437 33109 42135 34168 42200 33896 42009 33604 41785 34699 32807 33448 32999 34048 34736 36072 34089 35060 34036 35446 33957 37961 36573 37401 35661 38775 34889 36263 42327 34800 42374 35336 40580 34160 40027 42680 39373 42921 40596 35108 41113 36662 35461 40194 37143 40565 37159 40715 37933 41478 37320 41216 36714 41200 35792 35693 39686 33904 39903 42754 39571 34000 39712 34560 39826 37114 40723 35332 33056 37707 33896 38536 33825 40635 33828 39112 32962 36567 40416 35368 38049 33311 39120 36215 32874 39484 37112 41163 38041 39793 35858 37909 40080 34951 39005 34483 40136 35819 36400 35764 41256 36096 42544 38627 34545 39562 35650 39580 34785 37862 42024 34653 40011 33732 41305 36056 32978 40080 36776 41316 36832 40992 36064 36688 42673 35190 39481 42704 37414 34773 42720 34728 33257 37696 37437 41494 39766 38400 40256 37526 42664 34801 35840 42538 37974 34227 35747 35904 39672 38008 37392 37760 35441 37794 38488 42418 39764 41840 40432 35271 37350 40880 43401 35226 36681 35154 42650 37040 38477 33508 37520 35328 38212 37056 39506 39216 40834 38963 38992 33733 41146 41207 33264 41795 34325 42199 33520 33921 37032 36996 38280 35000 33040 40049 42994 41075 37708 36781 40818 38350 36612 42299 41924 41216 34711 41637 35851 33146 37901 36632 38304 33872 34193 39716 33800 40482 38137 37572 40820 35968 37312 39943 32749 42008 35976 41434 38225 34595 39652 33569 35804 38993 33744 40932 37834 35064 41205 37088 40052 36044 35089 40508 35863 33270 34697 41432 38691 35508 39505 32941 35980 38344 33096 38800 35616 32509 38776 35929 41378 35561 40001 42385 34007 39414 34253 42096 35609 40720 36697 41142 39271 35411 37179 41312 35440 38490 35968 42304 38562 35712 41267 37642 41608 34632 34635 39822 42663 41069 35560 41106 36977 34314 39127 35795 38540 42676 42940 40219 35254 33992 40448 37914 38963 42503 34394 40376 37493 42169 36490 32682 38901 35974 35680 38720 39562 35792 42419 38903 36084 43641 38824 40737 34719 35505 38664 39769 35403 36997 43224 39992 34315 34726 33911 37442 37384 43365 39244 38203 39842 39179 32808 31069 37728 38401 37008 39820 47657 36557 36140 35939 36576 36644 34956 34144 41253 35650 37973 41483 36936 42247 41365 34232 33818 35029 35197 32632 38002 33536 42166 33008 41216 40896 41032 37959 36608 37316 42616 38832 33008 32858 41931 40075 42092 37840 34761 34080 40997 42453 40976 36638 37168 37611 32576 37492 33381 33430 34134 36486 36224 41081 36864 39254 36465 35241 40857 35184 33353 39897 36880 39720 41731 42034 39938 37092 40503 37617 35840 36098 39671 35674 32823 40256 40183 37346 33774 34295 38281 39617 35601 37632 42387 38688 34868 40035 41914 34060 39303 36417 36290 40117 37332 38449 41060 33640 38663 39880 38688 34436 41222 38848 38336 41079 38506 42914 41808 43660 37812 38825 37920 37348 40448 36328 34961 38486 41924 33996 39424 37828 35104 42256 34171 37623 38471 35224 41763 37532 34490 39094 41056 33243 40333 38170 37060 40496 34713 35367 39579 33120 40039 35667 42183 39274 42464 33741 38952 35152 34266 40288 36581 38612 42329 33455 40331 35977 41592 37571 35024 38937 41795 34107 38322 35045 34374 40025 37525 38151 37141 39714 42324 33667 34307 41966 41977 40384 33513 34080 42768 38735 37165 39336 36046 42890 39925 43380 37481 36785 32661 32971 43106 37996 39984 40873 34725 41199 38056 42027 36422 39917 32757 41905 40768 38559 41933 42338 35719 42160 39853 38944 40192 38860 42496 42560 36064 43394 37044 39121 39252 41824 37936 36952 33408 40070 32976 36032 39877 37833 33808 40739 35720 33403 36695 36968 41908 40160 34691 37516 39392 36832 33250 40724 42240 33923 37233 33527 41856 40896 37799 38275 40426 42305 42978 41984 34476 33905 38344 41910 42145 42160 39996 38483 36700 40982 34432 41360 38720 35816 35112 38338 35656 35829 38634 41067 42338 42056 36189 32919 39264 42432 42997 40902 39228 37091 41184 42026 33889 41925 35905 34839 37972 39736 33889 33856 40981 34747 35219 40344 37668 41216 38685 34692 33181 38100 36344 37400 40423 41431 33879 41905 37260 33056 38457 40461 34764 34028 42085 35144 34163 40417 35988 32533 39696 41298 42730 40888 40784 37674 36183 39499 37193 41808 38208 34678 35264 37387 38656 34956 42496 41257 33772 40343 36343 35179 35542 38265 34875 34027 41240 36304 35434 40384 33435 41974 38083 33926 33090 38601 37723 37404 39808 40432 34319 34589 35777 34721 38065 40521 43361 42669 40616 37008 35512 40325 34672 40192 38935 34332 35251 37856 36692 37968 41701 33860 40952 41396 34036 34960 41206 35613 37830 35360 37144 43605 34743 34871 40802 39831 36151 42037 42711 37280 33240 35620 39415 36684 39531 38902 37768 39646 41718 42665 35911 35077 33486 36675 41462 35921 42517 39222 35606 34624 37760 41170 40072 38272 40725 37449 42547 34619 39296 35587 38257 39980 42648 32904 32629 35688 37301 34732 39918 34599 37415 38756 35002 41544 35337 34235 37287 33652 40480 35040 37636 40089 34166 41968 43208 35879 34304 37751 40567 41931 42977 38509 36160 42594 41773 34805 33479 38364 41285 41932 33780 40853 36000 33862 41633 35687 41721 39628 42764 34417 40727 39874 37399 37589 40537 40045 42551 39315 41977 34268 40609 41191 31254 35072 31937 40499 41703 38621 41920 34708 34209 42057 46010 36244 39479 40869 35344 34189 32895 33425 37662 38363 32836 34665 38960 35674 32875 46232 42045 43824 39060 42881 37329 38087 33928 35079 34312 42012 42723 39511 37888 36358 38325 44032 39473 41448 36626 37187 35520 33184 39200 41888 34251 42373 37997 35264 39521 39068 40173 37088 39658 36071 42305 39734 35952 34560 35852 34886 34375 36329 37381 32940 41728 40587 42967 37074 39219 33792 36628 35031 40548 41558 32819 35137 38165 38484 39453 38788 38988 33635 38347 40903 32791 38060 40967 36736 40053 39441 38848 38076 35992 36872 37667 43716 43248 40636 39464 41520 40725 42409 32540 35607 35112 40791 36196 39563 34336 37200 34351 39061 35882 38387 42928 41962 33907 36873 34010 40552 35259 38344 36161 41337 33846 35925 34624 40447 38017 38538 33216 41448 34695 34136 37120 40704 34790 37984 36781 40593 39477 42777 37664 38474 37587 36956 36375 40056 35817 34032 35757 40181 37744 37620 37368 38512 36920 42018 38656 39939 36658 37159 38935 38998 34757 42099 39448 39974 35065 36182 39920 39604 42908 33264 37621 38919 38163 36573 36944 
23976 22880 23835 22892 23950 23185 23751 23012 23680 22978 23549 23302 23275 23044 23382 23414 23216 23363 23232 23429 23974 23143 23735 22825 23670 22784 23994 23119 23715 23058 23391 23093 23273 23518 23313 23185 23655 23033 23512 22784 23885 22896 23683 23074 23424 23088 23216 23546 23375 23348 23438 23047 23305 22898 23878 22850 23587 22964 23620 23060 23255 23746 22945 23495 22798 23969 23265 23504 23682 22709 23482 22202 24480 22944 23921 22967 23458 22879 23232 23847 22752 23295 22380 24295 22872 23623 23553 22922 23253 22390 24480 22447 23923 22752 23826 22844 23093 24036 22643 23899 22407 23717 22516 23434 23205 23263 23053 23143 23568 23077 23271 23035 23541 23275 23489 23191 23386 22609 23371 23378 23175 23268 22938 23751 22839 23584 22925 23544 23041 23221 23427 23168 23399 23143 23416 23259 23011 23642 22825 23591 22702 23848 22913 23616 22848 23609 23077 23550 23176 23090 23088 23132 23109 23174 22852 23077 22842 23261 22918 23232 22855 23177 22825 23239 22912 23141 22816 23303 22862 23461 23119 23821 22976 23506 23048 23414 22944 23377 22712 23232 22915 23401 23053 3551 14484 15872 15823 16417 16267 16819 16423 17072 16817 30010 25962 25559 24329 24567 23764 24175 23524 23943 23459 23797 23392 23833 23353 23780 23232 23827 23227 23850 23197 23528 23092 23632 23097 23604 23248 23800 23325 23723 23447 23927 23620 23933 23568 23902 23578 23953 23488 23991 23591 23917 23600 23896 23525 23748 23014 23420 23018 23121 22697 22865 22522 22816 22579 22756 22599 22668 22806 22945 22867 22951 22935 23068 22780 22855 22843 22906 22583 22711 23063 23113 22814 23065 22906 22930 22692 22759 22554 22756 22493 22733 23015 22835 23154 22877 23181 22847 23168 23015 23320 23159 23385 23364 23528 23161 23298 23149 23444 23190 23448 23273 23696 23335 23763 23386 23716 23473 23788 23462 23751 23425 23801 23410 23811 23416 23799 23396 23682 23285 23618 23207 23547 23016 23328 22904 23287 22764 23366 22912 23389 22765 23351 22936 23328 22864 23435 23125 23472 23074 23448 22956 23446 22865 23364 22620 23232 22661 23198 22667 23184 22677 23146 22631 23161 22794 23165 22865 23434 22912 23535 23040 23629 23191 23608 23185 23655 23140 23614 23000 23525 23027 23340 22874 23255 22941 23209 23020 23239 23389 23744 22940 23141 15131 17288 17584 18098 17990 18620 18311 18882 18580 19161 26298 25559 24875 24992 24814 25066 24395 24611 24487 24672 24449 24378 24336 24633 24423 24719 24595 24303 24386 24476 24461 24599 24481 24553 24246 24253 23957 23931 23697 23505 23136 23085 22759 22504 22746 22890 23015 23005 23323 23223 23540 23386 23649 23495 23622 23366 23524 23352 23536 23208 23271 23056 23322 23084 23219 23003 23163 22850 23150 23232 23287 23057 23448 23260 23597 23449 23774 23475 23820 23360 23755 23219 23474 22998 23354 22822 23193 22888 23238 22707 23149 22664 23181 22743 23429 22949 23579 23153 23621 23001 23442 23161 23517 23238 23735 23193 23707 23189 23663 23184 23594 22915 23653 23031 23463 22974 23407 22944 23273 22885 23335 22878 23337 22905 23152 22868 23464 22855 23237 22641 23153 22737 23222 22887 23341 23048 23478 23145 23623 23349 23667 23402 23756 23443 23636 23184 23485 23025 23256 22983 23196 22772 23091 22767 23229 22799 22919 22512 22613 22459 22903 22897 23460 23459 23824 23791 23840 23812 24028 23749 23796 23756 23940 23732 23789 23552 23625 23410 23384 23187 23032 22874 23067 23263 23214 22929 22915 22764 22785 23010 23030 12501 18316 19164 19261 19694 19990 20425 20368 20481 20378 27086 25112 24800 24355 24224 23876 24036 23649 23757 23251 23377 23029 23232 23028 23199 22957 23296 23046 23477 23188 23703 23335 23726 23328 23597 23085 23367 23078 23384 22988 23333 22747 23276 22821 23172 22780 23361 23079 23751 23322 23852 23411 23746 23303 23623 23076 23415 22784 23187 22704 23093 22805 23181 22814 23552 23119 23681 23129 23641 23031 23575 22888 23360 22886 23444 22844 23154 22696 23353 22725 23383 23095 23649 23322 23751 23229 23680 23072 23312 22709 23062 22677 23189 22979 23462 23173 23566 23240 23560 23118 23337 22977 23241 22453 23513 22977 23010 22764 23133 22903 23511 23360 23577 23593 24124 23744 23744 23189 22755 22213 22426 22284 22885 23384 23878 23749 23656 23023 23129 22923 22881 22222 22897 22619 22633 22357 22909 23162 23767 24000 24314 24081 24373 24192 24109 23685 23524 22871 22430 22817 22741 22924 22961 23336 23215 23425 23227 23470 23127 23149 22997 23157 22948 22922 22947 22983 22836 23277 23233 23691 23318 23695 23323 23709 23105 23281 22812 23067 22689 22999 22821 23258 23129 23385 23093 23475 23264 23500 22992 23271 22825 22941 19224 20528 20326 20919 20782 21399 21166 21752 21272 29856 24393 24200 23343 23463 22965 23379 22774 23257 22952 23531 23177 23654 23301 23669 23143 23680 23002 23513 22999 23469 22990 23482 22954 23304 22883 23316 22945 23416 22822 23342 22704 23346 22703 23187 22637 23236 22891 23431 23095 23566 23352 23732 23323 23753 23365 23636 23204 23633 23215 23481 23095 23434 23010 23210 22702 23074 22661 22990 22733 23045 22724 23134 23002 23431 22880 23319 23056 23428 23349 23856 23723 23815 23737 23818 23304 23151 23140 23353 22855 22969 22747 22912 22534 22927 22710 22779 22388 22619 22506 22680 22921 23352 23396 23112 23272 23769 23966 24231 24197 23908 23599 23250 23426 23065 23152 22843 23054 22769 22928 22779 22847 22825 23019 23069 23243 23154 23421 23288 23497 23154 23454 23179 23329 23081 23239 22896 23096 22948 23147 22842 23193 22693 23087 22588 23012 22700 23147 22944 23387 22698 23089 22737 23183 22878 23439 23045 23506 23172 23620 23153 23704 23287 23746 23206 23712 23281 23713 23212 23661 23005 23461 22934 23202 22756 23413 22844 23414 22773 23364 22892 23330 22886 23316 22800 23178 22669 23317 22760 23095 22747 23198 19610 21732 21562 22216 21600 22193 21714 22199 21760 22304 23667 23485 23062 23317 22936 23270 22819 23104 22711 22990 22640 23010 22649 22959 22736 23238 22837 23096 22719 23104 22680 23001 22672 23017 22609 22907 22582 23150 22869 22884 22592 22958 22586 22720 22545 22802 22464 22785 22550 22965 22926 23309 23041 23623 23719 24064 23840 23926 23765 23980 23671 23887 23713 23787 23722 23960 23950 24072 23906 24240 24138 24215 24078 24209 24153 23819 23705 23410 23633 23392 23658 23374 23605 23410 23530 23444 23479 23269 23380 23225 23446 23264 23363 23225 23389 22871 22985 22755 23040 22832 23031 22912 23191 22829 23365 22887 23424 22363 23189 22817 23222 22832 23273 23008 23385 23049 23496 23160 23495 23128 23495 23043 23513 23033 23296 22870 23218 22680 23119 22672 23208 22702 23303 22848 23340 22896 23337 23017 23595 23207 23715 23300 23530 23067 23481 22785 23181 22615 23215 22624 23383 22685 23383 22731 23258 22872 23365 23067 23564 23211 23424 23048 23182 22654 23100 22578 23185 22769 23367 22898 23576 23212 23794 23271 23706 23206 23478 22964 23192 22806 23103 22648 23133 22746 23319 22517 23099 22960 23412 23085 23449 23153 23384 23013 23197 22752 23020 22668 23032 22631 23131 22961 23481 23516 23976 23601 23778 22742 22802 22424 22616 22621 23012 23193 22823 22842 23381 23496 23849 23737 22811 22355 22234 22155 22608 22751 23168 23254 23850 24039 24320 24105 24136 23548 23319 22757 22509 22691 22801 22738 22864 23024 23553 23577 23313 23413 23237 23438 23160 23319 22969 23061 22775 22939 23007 23283 23296 23524 23431 23577 23442 23335 22912 22914 22756 23098 23296 23104 22884 23362 23241 23397 22919 23072 22720 22999 23005 23476 23226 23701 23209 23502 22892 23093 22681 23222 22839 23219 22881 23431 23192 23409 22802 23047 22608 23218 23063 23589 23212 23627 22935 23195 22625 23243 22641 23245 22729 23399 23063 23607 23012 23297 22669 22947 22628 23347 23204 23760 23350 23619 22962 23114 22586 23146 22670 23328 22776 23247 22958 23632 23096 23512 22789 23136 22546 23044 22857 23272 23040 23612 23244 23739 23176 23632 22797 23063 22721 23285 23258 23287 22864 23497 23168 23643 23040 23257 22636 22961 22732 23254 23033 23679 23389 23664 23132 23338 22775 22997 22727 23044 22813 23225 23031 23549 22886 23037 22629 23059 22933 23553 23329 23687 23300 23338 22515 22921 22806 23124 22848 23200 23390 23811 23371 23232 22653 22393 22232 23036 23719 24217 23680 23124 22470 22667 22644 22897 22713 23434 23623 23719 10042 13722 14427 15446 16095 17028 17236 17885 17909 18123 29175 26608 25047 24626 24485 24437 24196 24697 24810 24247 23559 23053 23571 23635 23948 23921 24268 15604 17884 18208 18236 18123 18633 18705 18791 18769 19095 27004 26057 25176 24692 24279 24393 24261 24557 24385 24590 23639 23895 23640 23860 23568 24048 23833 18468 19124 19588 19441 20020 20217 20719 20523 20800 29878 25604 24583 24582 24039 24330 23992 24352 23932 23969 23320 23707 23532 24273 23858 24246 23490 23563 19848 21004 20681 21410 21193 21735 21296 21428 20794 26439 24403 24718 24103 24406 23668 23755 23176 23719 23287 23719 23616 23920 23410 23495 23058 23559 19917 22421 22249 22862 22199 22534 21916 22592 21991 22653 24308 24183 23425 23503 23015 23802 23531 24128 23559 23309 23123 23501 23101 23701 23430 23912 23048 23465 22844 23639 23476 23934 23175 23425 22902 23691 23049 23709 23442 23645 23011 23221 22953 23588 23509 23943 23493 23663 22903 23519 23117 23477 23279 23749 23280 23461 22912 23283 23174 23720 23557 23892 23286 23343 22880 23547 23080 23401 23277 23687 23338 23335 22823 23305 23476 24118 23954 23195 22508 23269 23017 23469 23697 23777 22633 22457 23031 23998 24320 24081 22727 22907 22909 23281 23923 23857 22761 22481 22763 23841 24256 24321 22510 22983 22578 23220 23778 24032 23080 22434 22705 23808 24253 24247 22850 22746 22992 23277 23988 23211 22261 22824 23674 24385 23830 23089 23013 22816 23274 23236 23652 23200 23111 22931 23491 23552 23504 22989 23247 23057 23275 23351 23548 23031 23054 23068 23488 23631 23360 22919 23147 23011 23469 23364 23493 22853 23206 23232 23706 23456 23277 22807 23768 23011 23590 23303 23247 22863 23413 23458 23661 22864 23208 22991 23399 23185 23586 22768 23297 23270 23824 23367 23424 22711 23357 23008 23545 23261 23541 22711 23277 23093 23878 23225 23138 22989 23385 22944 23736 22948 23176 22797 23694 23420 23719 22693 23389 22912 23367 23152 23469 22773 23254 23035 23848 23139 23250 22761 23336 23036 23709 22887 23173 22974 23739 23378 23456 22632 23510 22903 23477 23161 23197 22730 23552 23371 23725 22917 23207 23133 23431 23094 23586 22723 23264 23176 23760 23047 23190 22698 23325 23064 23607 22941 23074 22879 23527 23337 23709 22903 23220 22852 23463 23271 23360 22725 23264 23235 23795 23215 23184 22864 23236 23016 23570 23121 23075 22876 23469 23349 23703 22804 23084 22320 23284 23235 23552 22784 22927 23159 24144 23680 23260 22546 23040 23163 23987 23168 22503 22289 23480 24044 24223 23196 22607 22831 23697 23541 22816 22172 23176 23975 24297 22959 22741 22939 23060 23812 22758 22528 23939 24100 23119 22552 22362 23063 23949 22899 22324 22868 23947 24160 23210 22558 22887 23226 23318 23353 22774 23216 23388 23688 23127 22999 23235 23240 23288 23345 22984 23007 23205 23592 23153 23105 23276 23172 23299 23428 22760 23079 23168 23680 23348 23200 22789 23198 23024 23432 23171 23017 23000 23676 23351 23240 22792 23222 22960 23624 22998 23044 22914 23638 23373 23432 22711 23318 22823 23459 23171 23096 22723 23648 23332 23417 22624 23135 22780 23628 22917 13341 14602 16261 16256 16421 16119 16231 16561 17431 32870 27296 25745 25910 25207 25163 15239 17865 18064 19028 18439 18860 18573 19457 19226 19393 26921 26199 25289 25492 24607 15415 19160 20445 20179 20305 19835 20677 20248 20993 20145 26980 25573 25672 24544 24485 24090 20833 21172 21407 20974 21814 21752 21852 21024 21828 26568 25287 24352 24192 23907 24464 22023 22461 22153 22609 22528 22629 22023 22854 22700 22479 23841 24000 23907 24101 23101 23776 24551 24301 22900 23515 23496 24427 23127 22777 23593 24820 24147 23256 23023 23391 23886 24155 22791 23196 24271 24576 23159 23251 23063 24188 23815 22658 23201 24601 23893 22932 23249 23404 24177 23427 22457 23618 24576 23827 23252 23445 23579 23581 23293 23247 23873 23586 23128 23345 23459 23539 23524 23106 23661 23733 23270 23245 23517 23485 23312 23164 23900 23527 23355 23092 23406 23517 23462 22917 23644 23543 23528 23076 23541 23337 23394 22998 23892 23529 23264 23232 23503 23444 23397 22859 23684 23537 23632 22874 23445 23400 23576 22841 23596 23467 23609 22839 23488 23253 23585 22803 23621 23488 23440 23006 23521 23328 23354 22934 
22008 22334 23019 21561 22534 20894 23847 21170 22965 20972 23867 21532 23117 21696 22850 21800 22250 22637 22038 22521 21679 22983 21915 22695 22211 22664 22037 22210 22663 22077 22436 22237 22473 22377 22024 23031 21739 22784 22056 22892 21903 22288 22516 22194 22326 22169 22700 22349 22011 22947 21658 22848 21558 23030 22097 22720 22167 22322 22145 22129 22411 22473 22297 22699 22062 22568 21775 23095 21647 22860 21776 22991 21811 22408 22333 22327 22028 22347 22512 22494 22253 22249 22152 22369 21681 23173 21637 22844 21593 23031 21307 22749 22293 22489 21975 22305 22339 22221 22165 22733 21863 22531 21808 23122 21637 22822 21551 23093 21636 22898 21793 22813 21632 22513 22185 22388 21975 22360 22423 22304 22216 22349 22584 22502 22145 22756 21786 22699 21589 23073 21785 22817 22160 22408 22016 22133 22515 22372 22249 22616 22118 22492 21925 22954 21539 22572 21632 23207 21464 23066 21248 23709 21555 23061 21335 23552 21370 23105 22088 22567 21739 21819 23333 21452 22423 21167 23616 21377 22857 21589 22760 21941 22085 22839 21749 22224 21063 23908 21149 22973 21122 23561 21789 23035 21678 23160 9835 11273 12032 12944 13289 14096 14067 34918 32468 30899 29415 28625 27543 27047 26339 26003 25664 24869 24747 24133 24347 23860 23988 23607 23753 23222 23455 23282 23368 23196 23355 23110 23195 22821 23052 22778 23020 22529 22896 22328 22741 22508 22749 22323 22747 22297 22777 22253 22800 22028 22731 22249 22952 22163 22827 22309 22995 22305 23114 22326 23100 22275 23225 22344 23093 22272 23021 22314 22977 22311 22973 22407 22924 22391 23111 22285 22903 22019 22883 22168 23015 22254 23055 22225 23064 22228 23058 22400 22908 22293 22949 22379 23042 22105 22951 22064 22845 22032 22716 21942 22613 21954 22863 22025 22655 22069 22545 21939 22582 21904 22442 21991 22491 21861 22928 22052 22473 21856 22553 21761 22337 21884 22471 21696 22199 21532 21855 21296 21751 21123 21760 21448 21762 21497 21836 21419 21645 21576 22033 21463 21996 21584 21487 21060 21527 21174 21430 21126 21521 21436 22119 21876 22424 22512 23130 22339 22619 22583 23243 23050 23045 22929 22676 23003 22624 22985 22541 22768 22403 22483 22293 22360 22093 22261 21906 22113 21761 22128 21572 22145 21702 22159 21828 22350 21836 22319 22199 22584 22071 7685 10001 12474 13147 14695 14858 15825 15790 16529 33348 31895 29148 28267 26603 26477 24797 25221 24134 24535 23498 24168 23104 23744 23012 23405 22447 23381 22580 23279 21879 23278 22459 23062 22251 22842 22009 22619 21902 22637 21943 22797 22103 23059 22421 23332 22807 23317 22737 23437 22600 23450 22393 23148 22282 23227 22043 22800 21805 22473 21710 22387 21751 22493 22151 22853 22326 22926 22254 22869 22182 22758 22098 22690 22016 22418 21984 22828 22073 22656 21664 22359 21412 21893 21607 22277 21885 22472 21625 22406 22261 23328 23157 23771 23717 23969 23595 23880 23229 23472 23681 23771 23376 23328 22921 23032 22808 22493 22321 22466 21788 21480 21281 21896 21400 21429 20950 21223 21543 21733 22183 21976 22504 22172 22572 22216 22545 22208 22536 22432 22662 22552 22662 22273 22457 22219 22539 22080 22440 22037 22471 21786 22701 22092 22188 21723 22204 21645 22310 21856 22440 22097 22705 22192 22481 22005 22772 22294 23001 22363 23178 22406 23076 22245 22923 21993 22909 22111 22742 21947 22536 22089 22712 21861 22425 21687 22282 21605 22228 21528 22166 21451 22360 21407 22359 21423 22372 21497 22408 21800 22580 22103 10210 12305 14768 15212 16795 16457 17694 17235 18521 17935 30592 27745 27000 25532 25432 24019 24358 23206 23648 23108 23758 23158 23673 23240 23848 23040 23578 22941 23521 22864 23210 22405 22965 22189 22563 21915 22337 21760 22209 21644 22011 22017 22935 22866 23373 22728 22745 22349 22211 21864 22228 21700 21802 21323 21498 21253 21964 22192 22912 23099 23645 23680 23817 23648 23844 23242 23404 22637 22141 21399 21423 21028 21103 22250 22327 22675 22435 22761 22316 22646 22219 22378 22188 22272 22177 22235 21839 22066 22023 22561 22698 22955 22580 23110 22536 22947 22361 22742 22103 22304 21656 22239 21748 22549 22009 22864 22254 22757 22144 22607 21908 22469 21779 22201 21607 22235 21580 22413 21962 22968 22422 23095 22313 23010 21969 22535 21583 22192 21508 22235 21606 22595 22166 22704 22181 22808 21896 22620 21706 22876 21604 22914 21768 22483 21461 22281 21611 22456 22118 22853 22430 23049 22360 23101 22116 22817 21683 22438 21559 22085 21624 22408 21749 22764 22176 22905 22023 22528 21781 22434 21869 22524 21785 22087 21639 22306 22034 22663 22279 23111 22563 23063 22475 23051 22159 22551 21844 22283 21643 21962 21596 22204 14959 17376 17893 18947 18808 19042 18739 19323 19299 27607 25609 24660 24011 24268 24069 24375 23927 24619 24187 24392 23857 23876 23229 23157 22761 22340 21767 21692 21671 21569 21379 21305 21300 21684 22186 21960 22390 22163 22608 22459 22695 22482 22717 22535 22619 22378 22622 22205 22433 22056 22418 22178 22561 22097 22532 21987 22343 21708 22151 21768 22100 21724 22288 21941 22607 22091 22797 22440 23064 22563 23040 22535 23153 22426 22971 22454 23069 22346 22884 21943 22536 21812 22541 21559 22266 21568 22311 21527 22176 21720 22466 21815 22508 22184 22709 22146 22912 22005 22802 21952 22752 21709 22576 21792 22497 21747 22483 21995 22609 21793 22274 21654 22112 21658 22575 21828 22852 22006 23244 22176 22897 22365 23237 22276 23168 22441 22940 22097 22571 21920 22421 21613 22241 21585 21991 21568 22254 21790 22519 22128 22896 22217 22777 22301 22849 22182 22658 22175 22667 22241 22873 22273 22674 22279 22560 21885 22254 21774 21943 21703 22007 21659 22139 21588 21655 21392 21779 21367 21427 21141 21520 21109 21909 21469 21504 21266 21584 21310 21579 21285 21464 21420 21438 21432 22100 21716 21913 21972 22215 22426 21919 18033 18717 19698 19865 20386 20359 20738 20707 20962 20964 24856 23973 23300 22885 23095 22760 22983 22368 23064 22697 23034 22476 23030 22710 22652 22216 22480 22366 22806 22272 22934 22443 22865 22199 22842 22359 23008 22027 22699 22151 22598 21986 22717 22022 22741 22018 22752 21833 22773 21809 22433 21582 22451 21451 22226 21549 22231 21585 22272 21635 22193 21504 22319 21456 22247 21592 22331 21533 22457 21771 22756 21826 22487 21691 22878 22149 22441 22276 22807 21850 22793 21760 22573 21755 22609 21696 22528 21715 22520 21797 22599 21774 22575 21839 22517 22224 22808 22177 22860 22304 22745 22209 22711 22211 22633 22081 22576 21901 22241 21664 21996 21528 22087 21687 22295 21944 22752 22505 22927 22838 23379 23195 23459 23217 23847 23440 23792 23321 22859 21844 22048 21831 21883 21210 21583 21104 21504 21072 21487 21495 21728 21637 22122 21920 22284 22591 23104 22769 23047 22549 22501 22138 22155 21101 21127 20903 21296 22144 22119 22664 22370 22896 22580 22906 22488 22565 22013 22171 21956 22041 21917 22224 22127 22336 21978 22201 21962 22422 22223 22627 22185 22689 22281 22785 22130 22298 21803 21981 21761 22241 22084 22663 22400 23055 22403 23024 22433 22685 22263 22568 21724 22272 21584 22317 21909 22479 21709 22599 21903 22667 22074 22856 22010 22544 21698 22219 21435 22371 21884 22981 22401 23129 22314 22797 21930 22364 21666 22243 21571 22308 21618 22697 21784 22513 21825 22747 22084 22800 21913 22369 21520 22119 21577 22133 21897 22631 22000 22728 22324 23122 22391 23053 22391 22832 21632 22216 21297 22500 21856 22560 21645 22489 22040 22918 22217 22712 21815 22128 21440 22277 22118 22995 22513 23018 22214 22485 21664 22003 21744 22475 21903 22386 21933 22772 22253 22793 21645 22156 21643 22182 22313 23173 22763 23353 22087 21723 20958 21689 21548 21987 22326 22925 22851 22748 21896 21392 20851 21681 22060 23127 23536 23722 23245 23205 21877 21371 21364 21979 22016 22018 22422 22959 22775 22761 21539 21235 20791 21088 21288 22167 22726 23277 23517 23603 22626 22413 22184 21844 21974 21771 22413 22156 22184 21954 22500 22402 22472 22243 22076 21702 21864 21948 22410 22374 22873 22652 22963 22229 22275 21726 22154 22049 22790 21865 22412 22104 22664 22277 22804 22065 22051 21601 22369 22277 22929 22579 22899 21926 22144 21712 22280 22039 22510 22044 22788 22184 22555 21736 22330 21544 22438 21923 22844 22355 23195 22317 22765 21600 22437 22071 22549 21715 22791 22156 22576 21728 22153 21645 22599 22231 3721 6999 9898 10627 12197 12238 13624 13445 14880 14119 34908 31529 30732 28437 27885 26152 25894 24789 25669 24649 25240 24350 24561 23431 23649 22935 23525 7704 11469 12451 15139 15299 16740 16413 17339 16660 34725 31788 30816 28573 28269 26249 26007 24541 24877 24144 24611 24018 24418 23381 23508 22709 23369 23031 13165 14737 16717 17005 17847 17514 18715 18577 19356 31725 30130 27856 26840 25204 25132 24103 24649 24265 24755 23744 23589 22472 23174 22817 23201 23281 15404 16342 17376 17159 18162 18781 20496 21079 21506 20467 27911 25574 25066 24454 24337 24001 24709 24051 23405 22299 22098 23114 24197 24274 24460 23310 22665 17549 18799 19636 20251 20407 21551 21365 20549 19931 20898 25398 25610 25242 24819 22983 22265 22464 21936 23165 23003 23237 22537 22707 22279 23008 22921 23286 22916 22741 22192 22346 22539 22779 22739 22952 22488 22216 22123 22791 22906 23047 22714 22581 22000 22342 22096 22689 22349 22965 22385 22356 21854 22507 22443 22992 22883 22936 22114 22374 21865 22542 22139 22726 22181 22989 22199 22469 21676 22453 22208 23264 22554 23030 21985 22264 21845 21936 22205 22971 22212 22406 21734 22621 22364 23254 22240 22512 21636 22681 21905 22904 22163 22609 21473 22639 22368 23264 22325 22570 21637 22447 21957 22936 22286 22567 21537 22535 22140 23270 22467 22626 21454 22549 21868 22936 22195 22647 21553 22680 22445 23059 21904 22410 21936 22493 22189 22776 22011 22291 21724 22887 22445 23083 21886 22434 22113 22776 22053 22935 21562 22301 21747 22972 22495 23009 21656 22349 21468 22695 22249 22517 21623 22343 22169 23090 22389 22548 21626 22405 21920 22808 22157 22529 21636 22441 22352 23095 22103 22231 22003 22459 22263 22752 21732 22219 21848 23152 22215 22514 21396 22287 21901 22681 22311 22415 21226 22080 22657 23776 22735 21819 21185 21991 21955 23217 21797 21421 21108 23181 23569 23091 21315 21625 21742 22212 22883 22489 21037 21339 22489 23907 23061 21957 21101 21976 22235 23173 22144 21229 21242 23241 23457 22888 21088 21762 21676 22738 22820 21765 20953 21893 23552 23418 22071 21847 22380 21972 22610 22281 22232 21828 22442 22584 22896 22064 22072 22183 22439 22508 22213 21819 22128 22452 22918 22560 22261 21709 22262 21982 22730 22030 22144 21682 22767 22526 22710 21783 22199 21444 22392 22263 22777 21671 22179 22062 22959 22585 22479 21547 22379 21869 22709 22207 22260 21596 22507 22381 23100 22112 22179 21898 22388 21920 22785 21686 22274 22007 23063 22351 22807 21499 22499 21660 22688 22154 22497 21678 22832 22407 22932 21626 22236 21676 22502 22215 22509 21501 22698 22391 22586 21412 22400 21925 22919 21742 22249 21888 23268 22277 22376 21692 22295 22009 22897 21943 22210 21927 23040 22449 22313 21682 22565 21860 22934 21741 22173 21752 23077 22363 22801 21472 22894 21943 22838 21798 22153 21944 23008 22348 22611 21517 22390 21867 22667 22185 22261 21455 22354 22400 22689 21560 22328 21795 22613 22229 22331 21688 22686 22486 23040 21459 22150 21889 22508 22408 22321 21239 22304 23206 23420 21536 21696 21673 22753 22645 21528 20809 22704 23516 6088 7433 9853 11207 13538 14025 13460 13244 15110 37412 34596 30276 28468 27479 27644 10499 12052 13785 16632 18153 18095 16788 17095 17680 35977 33687 29611 28881 28012 27607 13880 15369 16941 18218 18663 19355 18992 19591 20150 20685 31462 29093 28089 26982 26199 17179 17417 19272 19918 20296 19928 20909 20648 21374 20913 28972 27319 26864 26035 25073 24162 20720 20988 21813 20935 22180 21952 22265 21132 22098 25977 25821 23936 24483 24131 24436 23022 23863 23055 23904 22994 23168 22954 24030 22871 23068 22338 23280 22721 23414 22158 22862 22776 23488 22245 22637 22361 23168 22584 22777 22085 23528 22704 22672 22173 22869 22544 22976 21767 23046 22784 23073 21903 22774 22108 23144 22192 22448 22477 23390 21657 22771 22000 23220 22006 22472 22169 23348 22205 22453 22167 23066 21865 22480 22572 23266 21854 22518 22020 23002 22240 22273 22227 23182 22312 22250 22039 22688 22309 22293 22465 23258 21969 22356 21997 22912 22016 22224 22589 23300 21907 21895 21828 22681 22426 21472 22417 24064 22759 21484 21928 22646 22715 21391 21796 23964 22613 21443 21836 22894 22371 21299 23252 23555 21470 
