# Supplementary material for: An Active Feature Selection Strategy for DWT in Artificial Taste
Source: Hindawi journal article supplement (doi:10.1155/2018/9709505), 2018-01-01
Supplement: f1 [file 9709505.f1.zip › maofengTea-hi-1.txt]

43449 43479 43477 43479 55 49 269 12455 17436 20151 20896 20756 21646 21136 21991 21415 21959 21527 22237 21672 22092 21761 21952 21785 21800 21594 21883 21655 22215 21988 22340 22008 22599 22286 22515 22409 22311 22385 22482 22208 22464 21873 22465 21803 22165 21761 22276 21845 22464 22001 22644 22188 22952 22229 22999 21984 22781 21968 22519 21751 22555 21820 22816 22264 22842 22380 22799 22356 22664 21920 22514 21894 22504 22036 23013 22335 23127 22010 22752 21809 22593 21735 22596 22119 22918 22552 22870 22417 22704 21906 22293 21946 22554 22374 23184 22182 23066 21991 22843 21998 22480 21838 22664 22032 22844 22400 22838 22574 22792 22609 22896 22608 22869 21927 22458 22237 23057 22391 22986 22150 22517 22319 22748 22696 22743 21890 22950 22442 22400 22385 22844 22045 23132 21970 22871 22746 22247 22952 23113 21867 22602 22676 22568 21816 22016 22840 23644 23126 22695 21898 21957 21687 21918 21757 22360 22829 23505 23388 23534 22698 21937 21718 22439 22752 22605 21632 22702 23521 22803 21667 22484 22735 22245 21932 23529 22356 22245 22770 22236 22887 22528 22697 22507 22743 59 7831 10463 13226 13561 15125 16114 16240 17040 15657 34977 26091 24806 23910 23216 23184 22966 23586 22912 23368 22572 22823 22347 22966 22664 23154 22728 23233 22677 23070 22551 22941 22552 22907 22290 22704 22059 22631 22102 22874 22245 23008 22197 23016 22107 23182 22200 23287 22137 23041 22107 22837 22066 22712 22116 23009 22705 22883 22677 23015 22034 22881 22480 23312 22065 22791 22565 22881 21982 23041 22242 22511 22384 22753 22134 22945 22263 22622 22695 22736 22397 22962 22336 22892 22321 23153 22336 22754 22220 23113 22340 22080 22485 22701 22768 22448 22372 22880 22296 23212 21952 22767 22511 22653 22733 23028 22019 22772 22532 22592 22240 23200 22496 22366 22382 22884 22056 22545 23246 23380 22017 22082 22400 23010 22581 21893 21849 23303 23457 22440 21641 22406 22359 22867 22880 22601 21735 22056 22706 23368 23448 23306 22400 21959 21632 22216 22359 22556 22800 22921 22777 22612 22712 22216 22610 22357 22840 22790 23035 22935 23072 22966 23120 22922 22934 22737 22561 22228 22437 22016 22633 22087 22574 22363 22912 22357 23094 22231 22785 22392 22814 22288 22886 22147 22844 22281 22858 22293 22830 22340 22816 22343 15540 17560 19129 19094 20071 19586 20692 20300 21369 35714 26197 24132 24147 23264 23449 22778 23169 22329 22923 22354 23163 22506 23143 22321 23000 22037 22865 22501 23360 22792 23366 22415 22708 22220 22976 22453 23081 22346 22795 22258 23248 22640 23021 22061 22824 22361 23035 22403 22887 22042 22775 22736 23308 22384 22601 22349 22893 22481 23006 22274 22728 22708 23284 22417 22646 22567 22852 22437 22369 22682 23479 22392 22377 22770 22684 21761 22650 23560 23353 21701 22720 22762 22372 21724 23601 22897 21961 22908 22535 21814 22997 23456 21969 22768 22688 21812 23243 23126 21982 22919 22700 22098 23152 22566 22537 22758 22076 23232 22488 22720 22544 22547 22450 23046 22275 22913 22370 22868 22690 22666 22551 22657 22728 22881 22296 22882 22182 23216 22451 22926 22404 22577 22678 22620 22495 22740 22324 23238 22231 22862 22060 23264 22247 23080 22171 22844 22553 22852 22318 22711 22693 22709 22259 22720 22648 22777 22511 22848 22656 22768 22416 22946 22574 22760 22396 22664 22679 22617 22236 22432 22656 22599 22310 22722 22660 22917 22272 23362 21958 22961 22049 23202 22224 22876 22630 22684 22519 22722 22885 22642 22336 15005 20071 21411 20729 21974 21018 21697 21579 21590 21520 25511 23814 23503 22768 23672 22371 23016 22407 23019 22981 22576 23381 22148 22402 22963 22025 23008 22233 22908 22952 22041 23057 22916 22283 23677 21979 22541 23456 21975 22449 23322 21858 22740 23016 22016 22912 22309 22794 22588 22604 22696 23101 22201 23218 22629 22565 22868 22901 22242 23206 22659 22472 22845 23026 22114 23046 22627 22578 22615 23047 22243 22950 22528 22664 22533 23121 22080 22912 22441 22755 22240 22938 22273 22845 22407 23073 22128 22996 22176 23047 22359 22625 22620 23056 22115 23335 22275 22631 22647 22612 22298 23064 22199 23175 22037 23372 22388 22976 22439 22931 22336 22832 22094 23264 22063 23047 22439 22915 22152 22657 21938 22656 21933 22892 22345 22893 22453 23088 22087 22832 22794 23025 22104 22764 22620 22565 22832 22734 22311 22987 22193 23164 22264 22896 22552 22873 22746 22331 22560 22372 22944 23229 21852 22830 22183 22580 23528 22092 22871 22052 23287 22632 22217 23121 21933 23689 21984 23152 21760 23781 21792 22828 21952 23271 22055 22540 22740 22371 23163 22196 22871 22236 23132 22561 22901 22620 22473 22866 22772 22488 22963 22296 21674 21378 22276 21882 21991 22129 22315 21749 22481 25714 23912 22817 22925 22604 22967 22490 23325 22185 22887 22657 22788 22652 23316 22126 22980 22478 22893 22275 23432 22256 22877 22326 23120 22168 23070 22872 22917 22188 22903 22523 22761 22522 23364 22234 22666 22262 22996 22392 22694 22229 23235 22729 22996 22261 22935 22464 23136 22047 22834 22551 23334 22621 22983 22155 22728 22313 22803 22584 23021 22353 22608 22198 22653 22416 23111 22755 23318 22839 23267 22839 23034 22647 22379 21868 22068 21755 22055 22022 22194 22024 22601 22196 22455 22257 22621 22398 21906 22276 22322 22121 22229 22228 22000 21925 21954 21704 21997 22024 22412 22541 22912 23153 22948 23317 22742 23093 22579 22659 22323 22461 22421 22776 22631 22978 22665 22788 22367 22623 22353 22568 22099 22941 22493 23121 22796 23169 22535 22905 22066 22753 22572 23100 22369 22836 22186 22668 22522 23416 22566 22921 22087 23139 22317 23001 22237 22710 22558 23406 22505 22678 22292 23095 22431 22529 21879 23097 22704 23189 22023 23045 22343 22918 22353 23058 22698 22828 22312 23165 22116 22650 22590 23302 22145 23062 22436 22940 22135 23200 22739 22580 22497 21505 21644 22716 22518 22417 22325 22548 21865 23061 22254 23196 22717 22803 22459 23559 22086 23096 22507 22089 23461 22627 22232 22977 21863 22993 23298 22037 22935 22389 22197 23754 21824 23095 22215 22926 23248 22166 22793 21965 23527 22487 22690 22417 22604 22981 22659 22640 22632 22810 22760 22613 22673 22775 22880 22560 22732 22599 23097 22635 22919 22406 23425 22296 23097 22284 23296 22218 23033 22154 23293 22155 23120 22241 23416 22238 23040 22320 23348 22369 23223 22181 23373 22103 23104 22099 23390 22024 23080 22065 23284 22208 22985 22210 23312 22213 22998 22161 23412 22191 22912 22341 23027 22508 22838 22839 22681 22217 22780 22606 23047 22124 23335 22048 23113 22220 23242 22481 22723 22806 22675 22355 22887 22470 23133 22120 23353 22360 23220 22777 22595 22465 22784 22793 22944 22356 23392 22260 22766 22956 22337 22528 22982 22040 22832 22216 22566 22925 22097 23094 22883 22199 23830 22324 22407 23608 22183 22445 23611 21848 22613 23488 22095 22435 23536 21968 22553 22424 22565 23009 22399 23064 22659 22497 22622 22882 22272 22830 22665 22560 22816 22920 22279 23242 22588 22561 22640 23149 22284 23228 22519 22652 22835 23093 22048 23313 22412 22653 22716 22867 22459 23382 22480 22869 22720 23119 22062 23192 22383 22805 22246 23132 22144 22848 22456 23125 22069 22967 22663 22836 22197 23335 22275 22869 22698 23064 22174 23379 22556 22684 22386 22980 22349 22913 22369 23061 22011 23084 22438 22759 22301 23291 22192 22933 22829 22632 21789 23357 22278 22656 22851 22919 22378 23398 22315 23313 22905 22720 22423 23407 22487 22420 22942 22983 21836 23405 22710 21933 23194 23024 22034 23707 21802 22720 22610 22330 22999 21915 23597 21989 22683 22144 23419 22069 22982 22077 23221 23543 21812 23111 22262 22571 23237 22297 22805 22645 22800 22921 22676 22175 22641 22681 22940 22392 22541 22282 22854 22469 22851 22602 22855 22097 23336 22320 22969 22500 22633 22784 22552 22325 22716 22872 22695 22427 22878 22632 23002 22312 23180 22199 23417 22007 23140 22068 23492 21979 23173 22104 23176 22317 22770 22737 22903 22138 22979 22450 23397 22345 23369 22375 23079 22223 22946 22201 22650 22044 22797 22109 22774 21883 22823 22084 22869 22049 22761 22384 22788 22181 22794 22425 22964 22489 23140 22384 23205 22515 23320 22640 22967 22293 22544 22307 22620 22676 22960 22832 22933 23018 23052 23183 23153 22951 23050 23332 23121 23458 23131 23512 23085 23145 22980 22544 22522 21830 22060 22232 22562 21990 23368 22477 23687 9441 15307 16093 17011 16809 16364 17166 17211 17961 43584 29152 24661 24377 23397 23184 22944 22969 22756 22945 23155 23066 23184 23124 23069 23264 22776 23005 17057 19703 20509 21108 20583 21120 20483 21074 21236 36676 24408 24325 23296 23261 22665 23312 23146 23272 22377 23159 22530 23713 22661 23253 22380 22965 52 20615 20872 21672 21191 21980 21338 22054 21307 21943 26068 23900 22924 23575 22757 23461 22826 23536 22628 23361 22423 22989 22544 23337 22881 23145 22428 18764 21314 22128 21954 22621 22133 22241 22231 22655 21925 24651 22935 23516 22732 22948 23128 23088 22664 23381 22348 23082 22322 23500 22180 23088 22157 23808 20764 22279 21825 23053 22736 22276 22733 21913 22776 23292 22339 23182 22358 23192 23259 22140 22663 22912 22160 23863 22439 22412 22912 22513 22670 23312 22580 22645 23060 22368 23191 22793 22664 22551 22940 22523 23312 22391 22826 22704 22932 22307 23393 22788 22600 21772 22975 22540 22703 22572 23361 22837 22829 22496 23104 22691 22804 22272 23150 22777 23032 22051 22964 22315 23235 22441 22812 22258 23353 22828 23383 22426 22626 22192 22956 22469 23239 22383 22785 22187 23169 22631 23383 22789 23314 22496 23028 22250 22760 22167 22918 22148 23016 22293 23109 22519 23148 22552 23130 22535 23022 22487 22935 22512 23029 22646 22768 22430 22838 22609 22874 22391 22890 22547 22973 22521 23029 22732 22976 22621 23081 22537 22887 22556 22793 21991 22008 22016 22513 23155 23744 23625 23385 22391 22144 21768 22176 22886 23120 22512 22660 21826 22734 23252 23783 23157 22368 21895 22855 23092 22600 22647 22192 22724 22773 23266 22584 22663 22617 23049 22517 22557 22592 23271 22901 22728 22505 23114 22518 22768 22404 23339 22656 22708 22607 22848 22328 22915 22896 22957 22092 23148 22358 22852 22397 23458 22316 23070 22422 22989 22224 23459 22226 22987 22489 23156 22272 23376 22504 22790 22551 22826 22472 23347 22230 23176 22122 23097 22694 22831 22472 22919 22160 23476 22309 23182 22534 23079 22644 22924 22444 22809 22832 23046 22610 22951 22312 23353 22176 23069 22297 23157 22453 23044 22640 22971 22633 22905 22499 22789 22912 22684 22485 22683 22866 22676 22664 22627 23061 22427 22861 22295 23352 22135 22784 22157 23412 22232 22619 22027 23553 22049 22839 22084 23600 22038 22646 22233 23565 22318 22550 22437 23325 22624 22486 22709 23516 22345 22909 22401 23162 22599 22920 22644 22897 22729 22221 22731 23182 22405 22880 22205 23256 22484 22825 22420 22696 22720 23104 22338 23149 22322 22842 22850 22743 22267 23095 22490 23072 22233 22891 22135 22817 22335 22822 22336 23047 22585 22825 22211 23351 22712 23150 22073 23058 22374 23144 22181 23256 22654 22737 22419 23150 22210 23504 22023 22960 22496 22848 22835 22825 22200 23089 22181 23498 22186 22960 22590 22808 22704 23224 22466 23161 22263 22981 22897 22859 22370 22916 22535 22735 22871 23157 22151 22896 22580 22685 22689 23285 22164 22934 22572 22643 23118 22872 22439 23163 22091 23754 21830 23191 22021 23644 22070 23216 22375 23187 22400 22632 23208 22561 22508 22473 23700 22048 22717 22475 23364 60 13818 17097 16867 19011 18818 18935 19456 18835 19434 34176 25749 23888 23428 23607 23025 18729 20744 20546 21438 21366 21085 21079 21783 21056 37452 24988 23563 23159 23568 22772 19904 21485 22178 21395 22181 21812 22492 21780 22255 22068 25335 23418 23360 22669 23392 17451 22236 21715 22885 22497 22934 22068 22367 21842 22741 24176 23816 22886 23520 22599 23075 21661 22692 22023 23054 22692 23250 22802 23228 22707 24974 23001 23488 22637 23176 22412 23162 22407 23003 22329 22992 22201 22694 22215 22742 22311 22917 22434 22986 22452 22901 22716 23377 23008 23402 22960 23363 22942 23444 23053 23368 22970 23260 22688 22610 22101 22445 22386 22998 23008 22940 22597 22573 22035 22118 22122 23176 23673 23656 22755 22178 22443 23228 22743 22517 21924 22656 23632 23344 22048 22732 22808 22882 22852 22241 23117 22977 23032 22392 23091 22741 22926 22570 23303 22543 22784 22754 22850 22331 23332 22712 22828 22669 23217 22421 23409 22522 23095 22437 22816 22354 23471 22345 23177 22479 22659 22801 23015 22502 23074 22124 23485 22327 22996 22385 22861 22749 23112 22428 22990 22390 23468 22230 23194 
21609 21126 20960 20764 20784 21431 22325 22472 22056 21177 20840 21503 21789 21318 21810 20916 21517 21540 22112 21547 21371 21146 21720 21391 21578 20919 21637 21767 22108 21358 21463 21414 21891 21265 21319 21351 22161 21221 21299 21261 21155 21056 21023 20755 21094 20664 20939 20695 20713 20548 20691 20837 21219 21079 21908 21164 22172 21022 21644 20625 20571 20208 20619 20636 20861 21248 21485 22064 21331 21846 20732 20844 20312 20487 20865 21235 21991 21332 21960 21298 21685 20981 20624 20461 20852 21255 21593 22131 21327 21857 20663 21173 20707 21329 21235 21628 21448 21557 21334 21346 21068 21318 21072 20998 20971 21315 21184 21553 21122 21565 21196 21365 20929 21413 21293 21479 21616 21615 20909 21210 21316 21843 21209 21568 20825 21889 21383 21340 21057 21937 20914 21495 20935 21815 20853 21575 20912 21563 21345 21894 20907 21466 21187 21577 21149 21226 20969 21879 21376 21987 21442 21970 21441 21959 21498 21779 21255 21488 20775 21370 20998 21627 21185 21465 20853 21882 21388 21328 20772 21470 21213 21368 21143 21977 21104 21379 21183 21265 21241 21748 20699 21723 20743 22023 180 59 55 56 56 50 68 49 57 15831 24312 35367 27440 25607 24121 23733 22877 22818 21976 22606 22216 22780 21799 22462 21894 22395 21763 22119 21566 22225 21737 22108 21473 22204 21671 22464 21840 22658 21973 22139 21800 21883 21657 21794 21664 21282 21006 21413 21093 21542 21430 22160 21660 22485 21367 21516 20768 20757 20855 21619 22483 21111 20889 20807 21729 22200 20822 21297 22259 21361 20915 22432 21248 21164 22032 21063 21703 21419 21289 21283 21447 21509 21469 21424 21516 21510 21319 21342 21463 21479 21612 21369 21330 21537 21412 21111 21639 20971 22105 20814 21601 21308 21405 21592 21609 20742 21542 21220 21292 21177 21989 21134 21526 21230 21693 21111 21788 21604 21640 20784 21463 21189 21825 21008 21465 21216 22098 21384 21382 20992 21629 21174 21721 21073 21352 21017 21835 21562 22018 21299 21847 20873 21472 21429 21650 21256 21729 21352 21636 21030 21291 21040 21475 21408 22087 21546 22102 21447 22011 21159 21570 21173 21489 20800 21353 20974 21654 21186 21523 21240 21554 21274 21491 21402 21617 21461 21628 21412 21617 21493 21652 21527 21722 21468 21724 21401 21659 21392 21617 21440 21653 899 51 3587 6879 8620 10338 11065 11980 12219 12887 43365 31047 26072 24617 23988 23975 23463 23725 23248 23004 22094 21794 21657 22343 22476 22311 21863 22004 21193 21434 21763 22528 22712 22272 22285 21659 22022 21849 22221 21752 22070 21382 22061 22280 22329 22152 21922 21613 22267 22077 22098 21537 21926 21814 22573 22062 22096 21652 22194 21060 21427 20867 21178 21231 21879 21209 21308 21056 21610 20992 21152 21259 22034 21072 21443 21250 21573 20801 21749 21542 21985 20903 21632 21219 21726 20992 21970 21256 21441 21236 21600 20865 22008 21361 21466 21315 21609 20883 22054 21065 21431 21164 21478 21164 21938 20985 21735 20381 21323 21481 21449 21308 21777 20928 21995 21142 21484 21216 21223 21639 21507 21248 21573 21117 22023 21098 21684 21265 21359 21623 21467 21316 21510 21351 21850 21073 21632 21072 21843 21202 21760 21248 20989 22253 20841 21719 20774 22051 21136 21760 21184 21842 21319 21708 21480 20809 22455 20959 21469 20891 22400 20989 21424 20932 22315 21030 21308 21315 21657 21623 21325 21327 21349 21848 21071 21977 21133 21654 21085 21829 21376 21451 21704 21298 21328 21315 21643 21454 21228 21607 21248 21764 16396 19296 18811 19516 19447 19882 19601 19752 19815 20192 24001 23408 21745 22054 21298 21942 21480 21472 21719 21684 21144 21714 21189 21899 20935 22076 21271 21591 21541 21608 21333 22133 21096 21761 21250 21568 21232 21632 21052 21787 20952 21820 21309 21456 21417 21792 21046 22033 21325 21607 21616 21528 21141 22125 21126 21078 21651 21471 21193 21994 21139 21856 21581 21394 21232 22075 21207 21449 21730 21600 21220 22008 21456 21306 21767 21504 21399 21939 21417 21350 21830 21661 20906 22249 21591 20763 22171 21636 20824 22606 21160 21336 22299 20793 21387 21805 21083 21741 20833 21853 21657 20759 22233 21504 21080 22391 20835 21798 20721 22516 20755 21720 21387 21415 22073 21070 21669 21383 21701 21305 21559 21345 21504 21440 21737 21361 21632 21135 21851 21678 21653 21116 21684 21211 21413 21703 21637 21197 21943 21061 22052 21166 22081 21336 21538 21528 21418 21201 21696 21371 22018 20966 21744 21206 21889 21570 21433 21129 21601 21547 21748 21015 21787 21032 22152 20972 21815 20951 22221 20956 21851 21202 21991 21478 21860 21328 21536 21620 21310 21281 21464 21412 21833 21155 21834 20955 22057 21235 21694 21476 21504 18603 20110 19803 20919 20361 21329 20612 21069 20864 20743 23208 22453 21524 21904 21414 21839 21878 21267 21367 21805 21117 22275 21604 20932 21450 21824 20912 21716 22421 20874 21457 21754 21399 21091 22341 22241 20761 21449 21605 21769 20759 22575 21808 20877 21072 21703 21755 20928 21164 21888 22114 21479 21316 21341 21754 21484 21441 21129 21920 21864 21949 21293 21296 21286 21669 21383 21826 21426 21617 20960 21658 21591 22073 21716 22188 21632 21980 21306 21668 20946 21323 20935 21506 21241 21750 21223 21665 21165 21789 21293 21811 21258 21915 21289 21802 21435 21862 21405 21896 21395 21891 21268 21744 21257 21828 21212 21779 21014 21975 21273 21564 21035 21297 21219 21794 21541 22187 21700 22272 21595 22071 21357 21765 21233 21560 21265 21760 21643 21780 21361 21663 21459 21704 21321 21275 21210 21947 21716 22203 21604 21603 21154 21657 21612 21732 21537 21699 20807 21226 22120 22720 22059 20983 21111 21994 21608 21372 20762 21371 22301 22433 21510 20915 21497 21953 21486 21120 21233 22548 21945 20942 21821 21512 21527 20998 22061 21772 21639 21305 21837 21632 21314 21806 22105 21189 21656 21437 21655 21101 22169 21760 21677 20697 21128 20650 21616 21164 21105 21111 21497 20895 23772 21504 22075 21504 21528 21653 22212 21142 22030 21195 21875 21725 21671 21458 21835 21005 22118 21256 21873 21506 21610 21715 22003 21173 21942 20875 22253 21298 22008 20743 21805 21712 21577 21504 21370 21856 22068 21296 21833 21120 22302 21120 21891 20967 22362 21184 22006 21126 22228 21146 21850 21366 21926 21681 21788 21466 21645 21771 21762 21447 21645 21837 21723 21499 21406 21976 21601 21533 21273 22462 21220 21446 21287 22413 21497 21591 21596 22120 21802 21511 22316 21622 22011 21214 22499 21605 22077 21434 22519 21297 22181 20963 22873 21115 21762 21712 21544 22246 21462 22311 21349 22086 21600 22149 21801 21819 22121 21693 21586 21898 21722 22082 21170 22406 21469 21974 21888 21719 21536 21693 21683 22167 21271 22390 21354 22049 21629 21881 21600 21943 21562 22200 21232 22298 21523 21699 21799 22200 21411 22346 21278 21984 21798 21712 21511 22022 21266 22118 21552 21928 21461 21968 21383 22040 21611 21861 21684 21582 22034 21973 21217 22425 21401 22033 22055 21938 21444 22368 21555 21376 21991 21730 21941 22263 21315 21313 22040 21656 21509 22230 21351 21879 21941 21760 21458 22247 21333 21791 21876 21699 21656 22058 21272 21781 22226 21286 21283 22891 21560 21266 22537 22040 21393 22791 21991 21049 22272 22228 21462 21517 22088 21571 21223 21947 22084 21120 21539 22709 21360 21399 22423 21590 21651 21838 22054 21287 22023 21648 21570 21856 22048 21522 21879 21639 21895 21517 22026 21577 21873 21552 22088 21319 22080 21802 21904 21574 22173 21353 21917 21655 21781 21563 22305 21344 22047 21930 21943 21429 22505 21279 21953 21399 22081 21577 21568 21832 22017 20805 22161 21462 22176 21540 22313 21433 22172 21462 21781 21844 22132 21504 21865 21351 22183 21934 21794 21337 22214 21648 22019 21495 21901 21216 21684 21642 21924 21559 21997 21713 21895 21422 21857 22121 21680 21321 22091 21372 22348 21312 21799 21632 22220 21518 21875 21687 22094 21674 21869 21897 21397 22681 21065 21984 21191 22761 21140 21952 21170 22753 21303 21877 22720 21003 21844 22742 21615 21655 21191 21112 21309 21289 21717 21964 22503 22153 22004 22009 21990 22138 21989 22022 21975 22032 22116 21932 21994 21936 21910 22027 21872 22123 21751 22040 21530 21834 21296 21637 21251 21904 21506 22299 21606 22392 21540 21923 21447 21792 21315 21713 21306 21746 21355 21944 21422 21739 21283 21774 21183 21678 21272 22090 21533 21313 21739 22085 22000 22054 21681 22025 21485 21976 21200 54 107 3466 5361 9447 16579 17537 17436 18226 35240 33600 25376 24411 23202 23186 22706 23079 22388 22778 21877 22394 21560 22263 21605 22249 21954 59 48 11443 13437 14436 14772 15861 15973 16499 15799 43366 29719 25152 23681 23328 23088 22393 21884 23034 21499 21972 21149 20666 20952 21376 22409 21831 13172 18232 19555 19722 20406 20075 20621 20379 20934 20261 35050 25053 23969 22605 23110 22226 22407 21770 22216 21936 22499 22277 22177 21766 22029 22041 22477 10581 18071 19534 20230 19712 20533 20050 20617 20391 20729 26374 24172 22640 22826 22524 22288 22105 22530 21719 22343 21768 22676 21537 22375 21601 22697 21480 18620 20295 21527 20893 21414 20970 21428 21191 21829 33435 23802 22208 22757 22120 22285 21804 22603 21650 22873 21587 22285 21744 22235 21689 22578 21424 22240 21840 22173 21883 22394 21234 22275 21629 22101 21985 21961 22042 22417 21655 22128 22060 22222 21427 22084 21872 22148 21445 22577 22055 22199 21495 22142 21893 22051 21519 22415 22219 22262 21369 21692 21740 22245 21935 21385 21725 22871 22705 22359 21254 21401 21397 21939 21908 22374 21869 21249 21693 22634 22711 22842 22417 21999 21329 21184 21393 21581 22255 21711 22071 21670 22354 21784 22181 21751 21870 21690 21812 21575 21911 21560 21885 21559 21923 21413 21965 21649 22053 21585 21947 21560 22119 21557 22107 21497 22032 21442 22000 21484 22108 21584 22247 21668 22370 21659 22163 21448 22130 21433 21929 21406 22400 21841 22667 21952 22456 21609 22068 21577 22331 21610 22281 21212 22025 21465 22575 22022 22340 21399 22130 21817 22205 21589 21969 21258 22471 22016 22469 21376 22175 21739 22248 21367 22188 21926 22557 21579 21984 21786 22172 21641 22057 22011 22222 21548 22363 21671 21956 21659 22602 21753 21842 21828 22138 21243 22001 22528 21653 21719 22209 21381 22044 22680 21569 21769 22136 21248 21473 22699 21932 21689 21970 20960 22759 21821 21785 21896 21298 22379 22393 21149 22296 21643 21923 22403 21696 22151 21373 22471 21580 22156 21744 21872 22200 21810 21877 21864 22038 22208 21703 22092 21293 22599 21420 22140 21460 22528 21414 22387 21336 22385 21512 22435 21520 22141 21990 22183 21583 22071 21803 22210 21569 22312 21688 22370 21283 22555 21478 22406 21590 22301 21700 22319 21652 22386 21591 22371 21433 22519 21339 22403 21367 22739 21497 22395 21222 22320 21661 22336 21318 22537 21362 22529 21257 22711 21302 22207 21172 22400 21485 22215 21609 21953 22121 21976 21760 22137 21416 22528 21643 22098 21229 21237 21488 22030 21308 21329 21489 21785 21552 21653 21525 21582 21604 21930 21752 21185 20809 22293 22423 22086 20884 21010 21361 21976 21206 21123 22325 21820 20669 21525 21380 21151 22440 20845 21368 21734 20897 22612 20935 21038 21872 21047 22147 21168 21884 21425 21271 21761 21626 21129 21789 21148 21783 21649 21304 21252 21733 21230 21651 21672 21647 21110 21688 21236 21520 21549 21893 20859 21618 21368 21361 21560 21692 21064 21830 20948 22238 20915 21755 20910 22242 20841 21833 20982 22047 21149 21891 21308 21829 21248 21780 21274 21524 21068 21756 21315 21813 0 55 4820 9173 9931 11825 12335 12943 13503 19318 43269 30312 24404 24451 22573 23131 2839 13152 15029 16503 15962 17155 17056 17475 17529 43369 29591 25399 23629 23271 22838 8547 15590 17676 18168 19237 18785 19107 19395 20290 43360 27928 24064 23552 23162 22739 8799 17783 20167 20517 19570 19772 20138 20536 20581 21125 27275 23623 22286 22217 22349 9263 20430 21795 21906 21784 21284 21228 20824 20897 21187 25344 23068 22118 22387 21987 21376 21318 21474 21174 21575 21229 21501 21177 21512 21116 21519 21190 21585 20995 21491 21175 21132 20954 21334 21037 21600 21314 21688 21081 21696 21368 21896 21543 22176 21577 22000 21261 21583 20922 21511 21191 21927 21111 21604 21161 21620 20876 21608 21436 22061 21512 21622 21008 21723 21216 21673 21040 21491 21504 22011 21082 21513 21243 21692 20752 21356 21237 22080 21129 21329 21260 21676 20876 21607 21595 21414 21153 21626 21018 21393 21679 21503 21282 21679 21016 21643 21709 21292 21410 21477 21076 21689 21604 21308 21392 21607 21084 22329 21055 21680 21297 21123 22375 21203 21472 21306 20845 22560 20573 21865 20860 21603 22224 21180 
22169 21625 21941 21408 21976 21226 21783 21700 22296 21729 22088 21360 22055 21896 22064 21472 21779 21149 22048 21913 22297 21256 21724 21732 21956 21446 21733 21381 22187 21831 21945 21432 22085 21763 21280 21360 22117 21938 22150 21318 21824 21697 21901 21524 21739 21959 22184 21154 21922 21782 21417 21137 22592 22408 21324 21319 22167 21449 21168 22229 22705 21269 21341 21985 21569 20936 22647 22082 21092 21936 21880 21216 21720 22673 21159 21944 21725 21902 21812 21889 21784 21968 21388 21557 21229 21781 21573 22438 21660 22282 21446 21803 21303 21696 21656 22221 21658 22040 21872 21961 21681 21960 21409 21719 21312 21686 21511 21908 21626 21906 21512 21584 21358 21783 21912 21980 21753 21754 21249 21948 21605 22314 21652 21541 21447 21982 21789 21575 21585 22061 21298 21979 21285 22376 21493 21935 21561 21493 21191 22513 22156 21408 21231 22148 21790 21421 20987 21137 21378 22034 21964 22332 22061 22032 21256 21111 20978 21340 20823 21800 22067 21833 20903 21900 22521 22145 20986 21677 21827 22125 21062 22050 22592 21596 21504 21888 21685 21836 22200 21442 21920 21462 22189 21356 25 7973 10992 12388 13632 14980 15383 16009 17076 43338 28022 23686 22841 22281 22065 21821 22289 21897 22478 21541 21671 21330 21942 21822 22019 21872 22050 22016 22044 21912 22105 21874 22064 21714 21942 21455 21762 21277 21796 21643 21900 21400 21990 21666 22042 21440 22318 21501 22038 21718 21920 21411 21754 21245 22073 21853 22061 21904 21897 21335 21808 21721 22499 21491 21835 21736 22151 21539 21773 21724 22169 21297 22149 21554 21672 21651 21883 21529 21959 21200 22392 21235 22171 21390 22337 21179 22168 21418 22413 21482 22096 21304 22306 21401 21927 21754 21667 21959 21708 21571 22153 21312 22291 21582 21877 21553 22064 21386 22213 21972 21662 21587 21904 21685 21587 21699 22567 21122 21383 21589 22103 21570 21185 21588 22772 22393 21732 20902 21724 21977 22087 21335 21075 21431 22404 22618 22618 21653 21225 20964 21382 21477 21960 22045 22102 21482 21226 20949 21360 22016 22004 22198 22112 22208 21767 21808 21460 21523 21410 21509 21606 21544 21621 21724 21724 21862 21920 22097 21833 22055 21776 22051 21841 21938 21528 21719 21626 21809 21575 21747 21437 21792 21361 21659 21428 21760 21417 21803 21474 21836 21432 24 15222 17496 17873 18846 18710 19497 19050 19607 19228 28042 23293 22637 21714 21974 21680 21973 21719 22321 22032 22483 21868 21919 21271 21881 21633 22161 21673 22001 21818 21810 21340 22052 21844 22352 21781 21933 21363 22064 21640 21861 21894 21760 21564 22321 21956 22243 21536 21691 21620 22056 21689 21741 21249 21924 21979 22299 21665 21604 21625 22118 21584 22263 21389 22076 22018 22016 21340 22085 21651 22252 21127 22114 22422 21629 21208 22266 21496 21129 21219 22696 22071 21107 21916 21920 21345 21833 22585 21683 21192 22214 21160 21268 22588 21745 21239 22091 21376 21717 22686 21279 21837 21658 21345 22020 21938 21540 21965 21575 22068 21984 21627 22018 21719 21632 22272 21503 22008 21440 21856 22007 21698 21719 21676 21722 22147 21394 21881 21417 22157 21765 21943 21661 21696 21981 21856 21713 21831 21539 22151 21494 22116 21381 22240 21626 22001 21454 21967 21735 22001 21536 21833 21856 21869 21666 21820 21987 21687 21661 21851 21945 21837 21719 21827 21921 21800 21727 21735 21978 21864 21623 21664 22009 21848 21437 21802 21596 22129 21305 22336 21377 21997 21559 22080 21788 21864 21937 21776 21710 21640 22016 21766 16694 19840 19463 20327 19755 20742 20391 20409 20762 41743 23152 22544 21931 22215 21314 22576 21517 21469 22113 21481 22017 21129 22469 21998 21344 22823 21175 22144 22413 21192 21510 22189 21545 22311 20914 22445 21980 21167 22368 22048 21095 22681 21676 21351 22708 21165 21822 22112 21719 21563 22080 21371 21910 21852 21587 21772 21901 21607 21920 21736 21635 21725 21930 21372 21856 21797 21591 21652 22176 21415 21929 21999 21734 21591 22092 21338 21808 21955 21833 21941 22409 21552 21687 21969 21920 21649 22311 21313 22017 21926 21687 21445 22109 21330 22022 21340 22171 21733 21757 21999 21971 21568 22359 21334 21976 21605 22109 21632 22084 21869 22066 21705 21944 21303 22348 21771 21806 21389 22069 21705 22244 21777 22123 21575 21920 21388 21760 21809 22328 21379 21952 21671 22040 21383 22295 21722 21799 21701 21756 21894 21930 21556 22095 21318 22377 21128 21964 21641 21904 22080 21352 21712 21760 21456 22673 21016 21653 21389 22154 21993 21415 22034 21126 22503 21423 21667 21336 22328 21548 21536 21892 21624 22481 21117 22176 21077 22681 21481 21690 21880 21814 22192 21453 21971 21458 22093 21984 21653 21832 21676 22144 15063 20387 21243 20822 21753 21225 21288 21348 21248 21517 24009 21964 22194 21594 22062 22101 21704 21625 22128 21500 22279 21808 21646 21506 22132 21299 22212 21893 21764 21438 22106 21593 21773 21900 22217 21276 22050 21627 21984 21337 22260 21728 21720 21481 22078 21612 21791 21521 22407 21949 21849 21342 21976 21723 21989 21324 22108 21888 22361 21524 21583 21366 21953 21732 22144 21617 21822 21384 21865 21755 22427 21953 22231 21762 21703 21296 21615 21299 21815 21692 21572 21659 21898 21861 22165 21894 22180 21957 22087 21719 21971 21527 21746 21563 21860 21156 21319 21190 21550 21440 21824 21812 22097 21988 22248 22048 22247 21961 21998 21828 21709 21832 21600 21826 21397 21576 21450 21783 21952 22119 22141 22236 22075 22132 21769 21672 21379 21668 21686 22083 21796 22002 21661 21880 21021 21859 21313 21783 21760 22308 21964 22004 21332 21818 21751 22188 21604 21943 21303 21779 21752 22386 21765 21901 21479 22062 21635 21915 21312 21884 21964 22289 21600 21815 21591 22160 21412 21728 21552 22500 21639 21744 21711 21944 21510 21709 21780 22348 21395 22016 21595 21822 21223 22322 21738 21744 21673 22130 21356 21763 22019 21979 20800 21717 21408 21586 21833 21841 21561 21760 21271 25863 22176 21827 21841 21926 21191 22739 21565 21728 21711 21296 22068 22528 21031 22231 21554 21649 22569 21156 21789 21751 21171 22793 21027 22228 21313 21848 22470 21144 21943 21258 22313 21688 21773 21704 21571 22060 21608 21767 21807 21969 21741 21959 21826 21916 21847 21815 21800 21824 21995 21739 21868 21352 22322 21431 21934 21354 22413 21468 22074 21275 22272 21262 22072 21351 22368 21332 22107 21381 22256 21380 22102 21372 22386 21284 22121 21206 22355 21457 21982 21392 22294 21478 21937 21423 22385 21345 21925 21488 22195 21659 21751 21894 21893 21639 21738 21922 22102 21443 22038 21578 22227 21200 22375 21360 21946 21648 21792 21644 21559 21878 21996 21557 22284 21340 21996 21458 22061 21735 21735 21988 21841 21626 21968 21632 22098 21223 22230 21778 21245 22320 21897 21287 22809 21393 21612 22440 21243 21492 21831 21217 22190 21118 22074 22038 21143 22168 22151 21024 22672 21966 21001 22300 22129 20984 22352 21530 21790 22214 21544 21776 21942 21568 21652 22039 21580 21816 22028 21669 21736 21896 21520 21893 21661 21675 21728 21945 21456 21997 21496 21803 21720 21883 21479 21960 21350 21936 21784 21783 21726 22100 21397 21856 21641 21997 21349 21948 21897 21783 21457 22349 21479 21977 21920 21824 21576 22393 21641 21636 21795 22236 21168 22116 21635 21901 21425 21928 21760 21703 21604 22297 21433 21733 21971 22048 21345 22513 21381 21903 21932 22187 21179 22213 21707 21540 21857 22157 21411 22153 21776 21652 21568 22016 21319 22189 21740 21661 21708 22098 21392 21797 21671 21869 21369 21946 21692 21349 21788 22109 21092 22321 20924 22569 21662 21521 22521 21041 21910 21228 22540 21408 21584 21345 22539 21040 22080 21493 21236 22880 20925 22128 21748 21338 22242 21993 21733 21494 21849 21830 22023 21824 21792 21712 21891 21894 21952 21619 21678 21525 22122 22108 21912 21532 22016 21465 22244 21498 21900 21648 21968 21703 22012 21770 21770 22005 21858 21721 21719 21923 21760 21542 21994 21840 21894 21526 21948 21875 21743 21687 21741 21713 22027 21498 21742 21712 22381 21579 22345 21522 22225 21491 21765 21280 21856 21264 21645 21223 21830 21244 21819 21205 21777 21232 21852 21367 21809 21441 21787 21554 21717 21404 21936 21536 22189 21611 22308 21629 22316 21650 21744 21397 21737 21594 21923 21817 21984 22093 21976 22304 22140 22319 22145 22361 22141 22648 22130 22616 22147 22655 22272 22083 21994 21649 21248 21006 21208 21366 21959 21559 22480 21688 12267 14865 16412 16305 15094 15916 16338 16921 17168 38064 24248 22989 22231 22060 21783 21533 21557 21826 21687 21870 21954 21889 22112 22063 22062 21996 33 17223 18246 19334 19056 19753 19151 19364 19513 19825 27511 22862 22140 22457 21558 21799 22061 22080 21651 21907 21653 22236 21584 22400 21496 21725 21309 12410 19432 20080 19959 20336 19890 20399 20070 20586 20198 24124 22050 22177 21795 22023 21771 22461 21712 22246 21387 21689 21321 22086 21979 22280 21272 21899 19073 21151 20541 21360 21437 21396 21168 21840 20905 43226 22910 21984 21835 21938 21760 21825 21408 22220 21685 22055 21696 21849 21533 21864 22044 21797 21935 21290 21047 22272 20683 21843 20884 22206 21898 21033 24970 21974 21761 22624 21047 21938 21644 21385 22656 21528 21308 22135 21248 21904 22445 21108 21744 21861 21531 22066 21833 21380 21861 21767 21608 22294 21569 21637 21944 21511 21838 22128 21824 21396 21875 21881 21640 21616 22284 21794 21523 21472 21811 21684 21670 21470 22366 21995 21954 21348 22225 21648 22087 21504 21735 21736 22317 21787 21815 21192 21880 21491 21980 21733 21995 21434 21701 21731 22317 21814 22112 21345 21724 21369 21752 21448 21908 21553 22087 21721 22179 21708 22022 21402 21752 21312 21800 21512 22101 21752 22221 21844 22212 21921 22340 21972 22225 22018 22327 22038 22240 21980 22361 22043 22164 21993 22301 21834 21969 21685 21760 21377 21471 21110 21495 21661 22104 21991 22080 21565 20965 21176 21120 21126 21929 22167 22656 22592 22080 21028 21249 21670 22208 21510 21568 21059 21343 22241 22823 22088 21177 21517 21764 22030 21624 21731 21377 21898 22017 22124 21613 21737 21899 21798 21475 21540 21939 22176 21473 21753 21822 21817 21336 21858 22124 21948 21424 22018 21440 21645 21768 22263 21632 21751 21761 21840 21222 22240 21814 21715 21747 21958 21187 22280 21776 21748 21681 21861 21415 21984 21958 21639 21640 22181 21485 22359 21241 22109 21485 21805 21965 21977 21605 21819 21211 22275 21386 22049 21319 21912 21801 21820 21621 21774 21872 21890 21690 21807 21309 22287 21367 22104 21419 22137 21496 22088 21991 21912 21721 22019 21549 21766 21895 21744 21746 21416 22042 21616 21705 21299 22332 21285 21872 21144 22537 21216 21587 21432 22357 21536 21655 21159 22549 21269 21608 21200 22567 21376 21634 21317 22309 21669 21539 21751 21943 21807 21490 21320 22215 21576 21815 21714 21888 21793 21632 21857 21840 21843 21911 21578 22199 21456 21933 21368 22040 21861 21668 21704 21905 21606 22221 21376 22040 21632 21543 22016 22254 21611 21687 21575 21954 21798 22128 21684 22025 21540 21735 21455 22317 21827 21928 21229 22016 21533 22056 21399 21927 22004 22232 21320 21940 21588 21768 21895 21796 21465 22132 21288 22288 21390 22063 21828 21751 21892 21997 21309 22235 21304 22346 21787 21887 21643 21770 21664 22338 21372 21921 21679 21854 21491 22336 21474 21827 21639 21813 21495 22304 21825 21560 21541 22096 21264 22368 21611 21797 21760 21510 22407 21529 21447 21720 22586 21269 21671 21250 22674 21085 21928 21147 22370 21341 22053 21223 22140 21452 21812 21636 22176 21248 3602 13729 16715 16881 17346 17836 17920 18248 17325 17733 26509 22496 22528 21709 22240 27 17947 19324 19683 19207 19696 19764 19677 19899 20006 27479 22895 21961 21894 22122 22206 18448 20256 20183 20805 20295 20742 20794 21221 20594 31216 22472 22309 21875 21959 21371 19214 20935 21563 20553 21187 21023 21469 21258 21554 21057 22664 21778 22306 21984 22506 18440 21737 21474 21799 20968 21482 21154 21530 21429 21511 22328 22104 21522 22036 21725 22088 21634 22115 21642 22039 21725 22151 21733 22102 21867 22041 21635 21927 21602 22004 21613 21895 21478 22257 21553 21696 21272 21805 21393 21527 21170 21493 21231 21600 21815 22514 22434 22635 22016 21626 20978 21250 21715 22136 22076 22003 21400 21381 20983 21828 22479 22597 21464 21111 21696 22105 21490 21200 21305 22603 22507 22131 21440 21788 21865 21673 21571 21792 22243 21592 21568 21880 21677 21302 21952 22032 21529 21738 21857 21344 21958 21947 21681 21725 21802 21277 22168 21833 21739 21765 21859 21229 22217 21641 21960 21602 21725 21823 22034 21491 21921 21331 22065 21882 21770 21593 21757 21765 21948 21629 21861 21171 22345 21273 
40449 34598 37760 41813 38400 40315 36239 35040 41291 35692 39283 41531 39296 37306 38951 42608 36226 39424 38820 37584 41573 40486 35671 35473 37847 42436 35894 41586 40784 36885 37932 42272 39559 35896 40516 41568 39945 37847 40054 41218 36504 35029 37377 32990 35588 38071 40419 39462 37578 36044 42067 39335 34165 42432 41437 41360 40545 42677 39642 41075 35716 40471 41616 38528 33633 36811 35072 39152 38764 37680 37195 39940 35449 35025 36992 40042 41042 36952 40066 41920 35972 33929 35650 34826 41477 40532 39027 33623 36892 35457 32949 41888 35169 36729 35005 37104 42593 42902 34803 38176 35647 42716 37541 36594 32537 38048 40158 40408 33702 40072 33168 36489 41462 36305 37391 38344 35941 35833 40086 38104 34195 41576 34696 33170 42304 38672 36288 33776 33614 39016 40852 38569 40808 42531 43296 38236 33660 42792 40161 43949 40441 41976 40721 40057 36364 42263 38055 39126 41594 38810 38182 42001 39401 38608 40304 39264 37601 41408 36268 36120 39112 36712 36772 37354 44017 40153 37850 35040 36476 39927 38510 38928 34145 33861 32400 36779 35013 36600 40528 42412 37644 42615 40881 41739 18288 31776 33485 27815 30884 35214 29824 36325 36576 41674 41664 36208 37068 41338 39241 36724 41298 37497 43600 33664 34780 40984 38024 36664 38520 36996 38832 38385 38957 37473 39645 37159 38936 35336 37783 42730 35904 40669 36270 34518 37248 41832 38646 34720 38746 42201 42127 43463 39095 35489 37353 42019 36136 40551 39412 37091 39204 37319 37330 41414 36337 35460 43604 43290 37047 35548 40052 33431 35831 35448 40216 40898 40182 33539 34577 34448 37267 33143 37975 39782 42680 40628 40551 42053 42117 40068 40304 42295 43089 43163 39576 40983 41702 42144 37992 35939 34737 38029 35335 33576 39899 40951 41625 34117 37076 33377 38753 41806 41000 38288 34867 33763 37056 35024 33773 35017 33904 38732 41874 34167 39546 33650 39500 33955 36209 42610 35734 36618 35496 38232 39512 41485 38759 42485 42809 34896 34485 34460 40098 37463 41664 43033 38236 39066 39637 42949 40512 37412 41424 38548 38607 40692 39664 40624 36058 36112 42408 33307 41698 33099 33938 33104 34182 35418 35440 36931 37394 39436 36748 39088 35833 38897 36727 37696 33046 35328 34311 36141 33756 35639 42368 36180 41456 34989 42025 35753 42038 36588 42595 36912 42182 18183 37307 30912 34872 35259 33623 31864 37309 33425 39123 41664 42421 35235 35184 38152 34804 38122 35560 41636 38724 43623 37399 37820 40653 37405 34249 39945 35008 38402 36513 36248 41303 39032 36768 41963 36247 37840 41655 39128 34443 36884 37174 35537 33538 41536 38117 41190 33254 35017 34128 38798 35180 35766 40104 37665 38419 41718 34889 33907 34248 39626 33787 41269 42082 39500 38550 38407 41424 39553 34693 41072 39360 39681 42980 34869 39835 41539 43168 39371 40259 35524 39272 39058 37626 37435 41328 36800 34209 34881 39621 40887 39606 40501 34421 35596 40420 39690 41558 35600 35385 40755 36943 34672 41175 38656 37808 33207 38074 33851 38929 38262 34578 38315 35594 34029 40877 43490 38865 42279 36960 38761 35128 35446 34827 35351 39908 41833 37482 42133 40440 35968 37922 34871 34828 38341 36817 35240 36621 33214 39963 43106 39936 41829 41110 34634 38368 42674 38567 35840 38416 33112 36440 36730 37191 34670 36402 38355 35226 34725 36848 37904 36833 35523 36480 37483 36177 35704 35660 38247 36978 34481 34413 38585 36795 42449 36480 34013 39671 41080 41961 41753 38856 33717 38967 36176 36912 37701 35778 35365 34243 38205 35832 32448 35462 31581 40960 35238 34721 41697 42220 35305 44916 40704 33613 37696 40903 41112 34088 32903 42617 39845 43008 38704 39184 43505 38890 41302 37135 39750 39809 42960 40020 33024 40403 33554 41616 36918 43248 38592 39842 42323 38945 39011 35392 34816 41472 35757 39576 36748 39478 35640 33629 38929 41911 37681 36902 33883 35744 37384 34273 37281 35557 34290 35506 37621 41776 36953 36195 34000 34348 40009 42310 37952 38788 35699 33957 39301 41418 36358 37964 36680 37768 42717 33524 35016 37991 37425 34456 41648 41112 38632 37713 35191 42292 39986 41283 38773 41426 40615 35781 36016 38712 38256 33478 42161 41495 38393 34170 39680 34220 39121 37275 39088 35344 37745 41051 42308 36220 36384 41827 39396 35377 40971 36032 39879 33952 37253 41761 35753 36224 41755 41856 37957 34985 38631 41864 41825 35690 36269 35168 35840 37202 37698 33440 39507 41181 42675 39248 38228 34496 37112 39082 41495 35369 35441 42264 35306 37696 34643 41728 40299 38616 42260 38866 39129 43986 42700 35063 41088 42032 33630 32864 36923 34323 43232 39520 40257 38768 35366 42729 35353 37079 36428 40311 42795 38457 42512 39829 38275 34688 36424 34881 39649 36752 41696 40784 35976 35854 40169 40813 41522 40260 33240 39513 38230 40525 34139 39081 39635 35271 34328 39579 43195 41680 36352 34585 32560 39632 40997 40852 37402 35699 42410 39857 34112 35894 37284 40813 40777 39017 34615 38058 41384 41464 35548 35305 42736 39653 34352 36214 32897 42512 38297 36909 41480 38374 35651 38360 41223 39860 37123 42288 33219 33839 41511 38085 35570 39680 34320 36497 41572 37264 36033 42923 38130 41128 35816 35255 40553 34627 40769 36708 35101 33576 34613 37191 37008 40212 37385 40304 38163 39512 35632 38132 33234 35484 33597 36693 39307 41268 39983 33641 41929 36518 36275 39366 38415 41153 38912 41373 38285 38696 36569 35400 36464 33832 36290 41808 33879 42248 36334 37729 39893 40295 41224 39560 39984 35995 34721 41491 34903 34918 39226 36192 38469 34896 37064 38160 37009 40915 36275 35488 41482 38324 38602 41225 36648 35911 40455 34192 37864 41070 36130 35721 42400 36056 37432 42884 39449 34485 37518 40811 37447 38135 41392 34104 36401 33980 39816 42080 35600 33171 43425 34829 35468 35447 37744 32900 35209 35796 42067 42087 38540 34178 36512 40282 41860 35920 35526 34790 39716 41703 35952 38501 38483 35398 35363 41696 33964 36515 36636 33546 35379 40546 38705 40246 36692 36637 37637 39936 36129 33724 35184 35450 40551 39220 33349 37953 41126 33561 34263 33850 39192 36292 35927 39535 36580 37984 40896 41152 36903 43376 39465 38106 40402 41872 35231 35904 35095 33552 38927 34168 35779 36458 38045 35899 38083 36472 37511 36949 36519 36146 36272 38582 35855 37047 41385 41927 42613 38113 41564 43069 43008 39528 40802 41192 40712 39329 41698 42380 41420 39948 41824 41321 41786 39780 41920 42712 40868 40001 40122 42368 42707 38707 41661 41716 43012 38000 42400 42763 41574 37880 42725 40869 34944 35897 37179 37274 34514 35556 37456 39576 42497 39015 33872 40784 39898 42701 41658 38130 34387 35840 34418 33504 37048 38504 33602 41184 41562 38726 42518 39463 35851 35680 38278 36688 34420 37843 34183 39281 40403 41140 36033 40563 41792 37496 40844 36864 41677 34468 42822 40819 43085 36937 40074 40757 39350 39385 38912 39431 40301 40260 37916 35026 38129 37735 41625 40005 37728 42019 33366 36020 40713 33416 35585 37784 33473 34317 38768 33876 36229 38624 34900 35478 37114 32818 37066 34801 34885 35266 37829 42374 38881 42990 36655 35360 37283 42908 38239 41492 37819 35992 36056 35597 39385 41963 36978 34448 38496 41542 38168 37338 36134 42401 42496 43189 38572 37472 36346 33607 42511 34683 34176 36064 41000 39552 39797 34482 37320 42132 37832 35556 35255 33937 41362 42509 35914 38157 38764 41403 44044 42005 37794 37799 40617 39992 40919 35558 33087 36688 40197 42176 40312 35906 34422 33314 38156 41219 40822 35895 34756 35214 39318 41697 36425 34912 37083 41720 38129 35169 41376 36308 39715 38819 41809 37177 34017 34648 32821 43746 38378 37536 40284 33776 41588 33890 41122 33880 37818 39143 43116 40546 37531 37121 39696 35853 41248 41207 38678 35720 42884 37106 36583 38681 36397 35936 35107 37131 37250 37779 34341 34896 32974 39627 39769 37516 33232 38144 42698 41312 43246 37632 34363 37865 35341 38633 35908 35813 38565 36921 35472 35471 37536 35569 33222 38299 36608 37219 33093 37773 37203 35945 35095 35768 35184 38664 43129 36096 35117 42508 34135 41948 33168 40656 43139 36096 40414 36902 40240 34753 40205 36720 40487 36744 39988 35998 40091 37033 41766 36496 42224 36416 33334 35260 41877 37825 33077 40439 34465 41434 34779 41640 34668 35458 41782 35894 33932 37473 36505 38144 39618 38296 41472 40266 42144 40084 42432 40424 35088 39728 34629 39869 35444 40922 39472 38572 34519 39909 37957 40006 41808 38381 33715 43122 35128 37584 34316 29080 39208 36992 35699 39888 35089 37240 36436 42125 39076 41185 39267 36224 33258 33335 36249 35110 37120 37888 37152 39504 39425 39299 38624 18135 37361 39121 40464 37584 34982 38715 40722 32456 35554 45949 37824 40105 43435 33843 36208 39146 39194 34661 37329 34601 40960 33845 42185 43187 35910 41068 28537 40972 38587 37536 41079 36608 42033 38695 33288 39692 41016 39020 40343 36302 38656 36032 43360 35448 41088 42069 35335 41028 39533 38509 41220 40660 37584 37612 39604 32885 41162 42663 42032 39616 36656 36739 40540 38192 38231 36806 37721 35559 36376 41765 41063 35223 39010 35057 36751 33287 36756 38889 36280 37875 40770 38540 41056 34602 36660 36327 40803 37442 38105 39037 38304 35738 34402 38225 37767 34506 41600 34967 32904 40814 40246 40185 37367 43232 39157 35688 36934 33258 38864 36720 41546 37200 35909 34040 41328 33757 34235 37682 32996 36621 39682 36440 41720 37391 37276 34349 33972 41219 36224 32985 42279 36614 34896 34711 42674 42711 38840 37956 41388 40967 34547 39354 32698 35552 35513 41795 36368 36484 39720 37268 42945 38584 35693 38527 42371 35464 35524 41792 36608 39474 41415 35715 41641 36021 42283 37572 33411 39312 35585 40303 35451 38505 41975 36018 40760 36325 32777 39376 35898 40929 36864 40653 37676 41954 38357 40889 38609 42064 39026 41002 38508 42368 39206 40208 38650 41770 36866 38095 35094 35456 41433 43139 39280 43200 35100 39410 38656 39175 33864 37427 39635 38914 39114 37780 40344 34897 33965 38978 38008 40181 34944 40416 33045 33238 38187 41607 41196 37132 39341 39824 33208 35495 38720 34384 35488 41383 37490 38456 39936 34497 35554 37344 36227 42713 33467 37652 40192 42801 36151 36586 36464 41185 37019 39858 38100 42026 38656 42219 34855 35625 41413 34358 35820 35592 36480 40131 41038 36624 35364 35707 37986 39803 41333 35968 35682 34807 36901 42136 38376 38112 34560 34204 40244 43124 42658 40726 39936 43157 36674 38216 38368 34176 36475 40136 41372 41952 39059 41315 37569 36308 36472 34337 35872 36887 37106 35075 36438 41069 41792 42000 39737 42378 40249 43108 39563 38586 37453 35520 38457 33598 35617 37314 35589 35624 41921 39062 34198 35127 40768 42144 40947 37132 39192 33670 39760 34028 42001 42496 33280 34560 39436 33844 40337 34247 39589 34180 41211 34450 40910 41886 35021 33172 35735 37945 36545 42817 41264 41096 33827 36400 35213 36928 36042 34115 36709 36540 36727 37536 33763 40584 42496 38116 41674 38935 37104 34699 35044 37208 34120 40835 41591 38933 34224 33264 38136 41424 34520 35030 33700 37713 36230 39653 35040 38546 33248 35552 42641 42144 36756 37570 40434 38457 33381 38753 42058 38025 38568 40974 41200 37939 33846 35617 37280 36117 42589 40093 40810 41388 42074 39525 36593 35936 37095 38616 41218 41330 41066 42280 36404 37504 34579 35733 34498 41732 41970 37733 35180 36914 42938 42038 42880 36835 34519 36296 43048 41681 36631 33456 33126 39108 40338 42320 34550 36098 35493 32769 42519 33412 42317 35571 34153 40343 35106 40041 35228 38720 37687 39460 42369 41764 39205 40432 40199 42695 36544 34285 40000 40203 26673 32008 32620 34334 39154 34912 35315 38959 39412 33884 45146 43910 33572 35245 40769 18349 35234 40330 34413 38992 34368 34880 34232 36599 37648 45702 38337 38144 37315 39825 40800 30871 39783 39892 35724 40764 34985 35397 40104 33344 44375 43697 41996 37385 38163 41890 39445 37256 33708 32623 39577 38247 42859 40616 33545 38096 34994 35779 41472 38372 43860 30832 35383 42504 36544 37364 42849 39559 33292 42038 33223 41640 39712 33075 38498 35702 39243 34344 39603 34567 38807 35729 40065 35766 39505 37280 38864 34449 37673 34009 38389 34419 37248 42786 41408 33579 34787 40347 36553 41685 33435 39337 43068 40784 34032 36387 43720 43216 35242 38272 34497 37392 40136 35507 39832 39424 38721 41897 41891 37956 36496 43648 34672 42432 39336 35044 39540 42965 40033 41101 34682 43803 40256 42304 36331 37035 34871 33553 35769 41072 34072 33280 36977 35032 40805 37922 38584 33226 35488 36793 41192 38199 38094 34944 35520 36197 40666 40320 36808 35776 35755 36908 40381 40984 34660 37863 34021 35484 36640 38640 42999 37785 41272 39220 37386 35857 33928 35911 35728 37926 34587 36905 39584 42218 40813 
22948 23127 22570 23216 22888 23510 22869 23501 22854 23094 22978 23767 23205 23410 22780 23120 22928 23319 22653 23131 22555 23495 23256 23512 22718 23420 22935 23253 22671 22924 23104 23667 23120 23074 23097 23460 22887 22760 22775 23560 23310 23139 22872 23453 22999 22902 22890 23703 23354 22803 23303 23236 22816 22619 23744 23764 22464 23248 23075 22768 22247 23597 23760 22379 23229 23168 22393 22896 23845 23035 22295 23556 22805 22424 23152 24026 23045 23070 23320 22617 23245 23232 23114 22913 23105 22748 23138 23210 23244 22868 23141 22575 23377 23197 22975 23155 23209 22649 23649 23072 23084 22895 23123 23136 23440 22676 23389 22617 23537 22839 23268 22983 23041 23296 23412 22855 23193 22517 23671 22752 23477 22675 22992 23155 23005 22914 23296 22792 23464 22519 23335 22512 23697 22564 23363 22916 23247 23256 22983 22802 22863 23094 23197 22840 23144 22696 23616 22587 23446 23593 23697 23590 23745 23684 24092 24032 24064 23767 23266 23140 24047 24693 24137 23034 23432 23762 24064 23118 23316 24471 24280 23077 23017 24022 23264 23951 23915 23520 23521 24003 23525 24147 23566 53 971 3383 5458 6977 7901 9111 9643 11437 8647 39624 31731 28544 27063 26401 25519 25815 25292 25665 24785 24871 24275 24785 24441 24848 24559 24739 24544 24661 24384 24596 24377 24623 24195 24491 23944 24275 23497 24071 23604 24139 23543 24205 23637 24120 23725 24407 23595 24183 23693 24039 23468 23925 23489 24079 23911 24248 24013 24151 23549 23772 23639 24508 23503 23945 23350 24215 23849 23764 23664 24567 23433 24173 23958 23717 23789 24400 23306 24265 23555 24160 23444 24004 23735 23753 23437 23944 23872 23813 23495 23799 23869 24004 23552 24081 23349 24295 23355 23811 23672 23668 23896 23968 23413 23921 23478 23687 23937 23975 23248 23779 23688 23724 23494 24220 23746 23216 23497 24050 23488 23128 23738 24702 23836 23131 23235 23581 23922 24071 22976 23547 24210 24734 24048 23280 22880 23193 23440 23765 23898 24083 23447 23014 23132 23863 24265 24580 24423 24167 23642 23224 23336 23159 23621 23348 23790 23479 23874 23602 23872 23657 23760 23556 23586 23439 23511 23191 23675 23476 23893 23566 23944 23652 24088 23674 24192 23879 24142 23681 24172 23648 24123 23844 24088 23750 24103 23640 24160 23704 24188 23733 24157 9220 13433 13883 15229 15294 16305 15713 16800 16373 17178 27749 26532 25434 25366 24646 24783 24146 24496 24101 24304 23520 24144 23832 24657 24043 24369 23525 23868 23415 24051 23673 24064 23492 23981 23318 23713 23788 24310 23653 23808 23273 24088 23527 23904 23216 23675 23175 24005 23788 24142 23315 23558 23526 23904 23373 23605 23153 23800 23831 24057 23406 23669 23506 23929 23424 23537 23425 24162 23712 23525 23505 23906 23305 23108 23816 24456 23077 23472 23876 23627 23207 23352 24402 23927 22885 23990 23319 22953 23903 24474 22915 23650 23545 23023 23900 24261 22800 23849 23403 22925 24239 23620 23394 23468 23451 23449 24057 23080 23852 23152 23648 23844 23541 23464 23516 23143 24055 23193 23713 23275 23426 23712 23469 23422 23255 23274 23967 23081 23788 23080 23732 23408 23562 23324 23428 23682 23673 23296 23700 23156 24072 22980 23818 23260 23982 23240 23776 23168 23746 23336 23748 23136 23595 23623 23396 23319 23450 23552 23436 23217 23387 23561 23504 23160 23353 23521 23558 23223 23533 23479 23503 23267 23424 23425 23634 23152 24072 23008 23783 22923 23973 23265 23545 23401 23479 23309 23222 23697 23300 23210 23362 58 16385 17155 18413 17711 18419 18377 18557 18695 18621 29273 25764 24658 24837 23856 24252 23452 24295 23962 23408 24444 23169 23782 23791 23370 24023 22971 24147 23991 23020 24439 23718 23031 24330 22710 23585 23777 23028 23536 23720 23077 23736 23197 23202 23761 22805 24179 23526 23360 23695 23717 23068 24012 23355 23367 23800 23591 23149 23937 23235 23581 23617 23552 23168 23979 23265 23485 23543 23682 23008 23845 23356 23305 23463 23773 23105 23986 23299 23237 23367 23718 22961 23755 23281 23411 23272 23744 22756 23862 23289 23355 23387 23707 23284 23963 23002 23580 23260 23334 23115 23581 23207 23749 22791 23980 23127 23762 23379 23587 23252 23514 23384 23681 23052 23627 23042 23398 23392 24064 23412 23787 23177 23719 23365 23976 23549 23816 23076 23337 23096 23661 23040 23409 23597 23408 23147 23522 23017 23686 23440 23270 23232 23257 23509 23493 23147 23549 22983 24062 22688 23470 23173 23186 24104 22733 23149 23625 22764 24101 22668 23563 22818 23770 23417 23239 23565 23234 23824 23019 23577 22764 24130 22646 23328 22752 24185 22933 23386 23301 23301 23533 23143 23154 23307 23285 23636 23024 23425 23094 23648 23449 23223 18903 19973 20458 20766 20408 20973 20354 21089 20810 43589 24632 24179 23696 24298 23058 23773 23415 23539 23572 23857 23041 23603 23197 23422 23441 23851 22743 23633 23196 23473 23177 23951 23093 23396 23140 23684 22944 23618 23461 23662 22872 23616 23096 23328 23152 23978 23379 23447 22840 23442 23264 23624 22940 23904 23493 23748 22848 23604 23018 23602 23235 23437 22843 23352 23262 23809 23438 23575 23137 23258 22925 23260 23190 23457 23163 23529 23246 23480 23120 23472 22873 23215 22887 23145 23235 23540 23499 23817 23809 24073 23973 24208 24072 24204 24135 24181 24162 24207 24197 24104 23978 23948 23594 23664 23497 23366 23094 23024 22607 22574 22844 23036 23459 23159 23507 23161 23418 23042 23272 23399 23400 22918 23023 22836 23212 23243 23734 23400 23737 23132 23367 22803 23079 22784 23336 23081 23565 23048 23389 22780 23162 23049 23680 23272 23618 22851 23207 22993 23588 22924 23462 22585 23300 23207 23880 22956 23185 22979 23536 22967 23440 22668 23335 23287 23735 22781 23459 23043 23351 22637 23569 23232 23317 22859 23570 22968 23271 22874 23749 23124 23296 23113 23463 22866 23469 23424 23672 22764 23446 22963 23154 17574 22087 21482 22204 21764 21947 22052 22357 21713 22342 24512 23564 23635 23459 23133 23448 22608 23633 23616 22844 23459 23118 22819 24156 22581 23498 23043 22684 23944 23272 23008 23243 22440 24142 22768 23425 22950 22833 24009 22628 23488 22716 23771 23045 23313 23017 23071 23366 23115 23146 23193 23367 23055 23192 23124 23287 23168 23141 23392 23155 23411 23045 23382 22658 23674 22693 23360 22625 23763 22705 23476 22676 23803 22631 23375 22615 23751 22679 23543 22582 23743 22675 23442 22569 23834 22657 23479 22652 23577 22814 23355 22813 23533 22887 23298 22790 23655 22821 22981 23063 23368 23020 23074 23217 23192 22855 23234 23130 23396 22550 23662 22610 23368 22719 23564 22990 23193 23299 23063 22935 23268 22967 23413 22648 23704 22853 23190 23152 23060 22992 23047 22985 23312 22983 23594 22743 23262 23040 22885 23049 23078 22889 23463 22457 23522 23461 22478 23719 23297 22769 23996 22339 22909 23586 22464 22923 23525 22420 23227 23055 22589 23128 23425 22375 23063 23192 23086 23307 22593 23630 23040 23027 23351 23311 22785 23569 23072 22945 23334 23188 23079 23626 22855 23332 23325 23325 22724 23570 22843 22519 23208 23141 22759 23657 23015 23711 23187 23199 22795 23577 22613 23766 23159 23160 22728 23712 22813 23097 23049 23485 22464 23453 22912 23066 22847 23355 22753 23164 22759 23424 22631 23278 23089 23176 22199 23686 22774 22976 23136 23442 22533 23484 22935 22973 22762 23526 22592 23357 22936 23366 22631 23291 22992 23002 22825 23438 22647 23189 23084 22969 22856 23616 22784 23169 23037 22950 22790 23465 22599 23628 23348 23049 22627 23895 22919 22802 23860 23056 22702 24104 22279 23139 22970 22882 23404 22394 23990 22643 22983 22810 23571 23028 22925 22587 23927 22456 23191 22972 22329 24015 22849 22994 23206 22617 22912 23047 23535 23205 23256 22771 22798 22721 22976 22753 23158 23131 23609 23221 23184 22568 23172 23068 22992 23168 23424 22757 23372 22597 23666 22566 23336 22571 23552 22651 23193 22801 23478 23131 23180 22839 23132 23079 23264 22829 23121 23047 23290 22897 23519 22544 23381 22971 22903 22704 23518 22867 23700 22631 23362 22875 23173 22450 22970 22441 23132 22568 23048 22436 23163 22452 23170 22405 23020 22490 23010 22548 22983 22569 22959 22493 23040 22683 23289 22762 23452 22766 23495 23178 23267 22689 22902 22628 23019 22865 23129 23183 23146 23367 23207 23600 23380 23558 23401 23876 23332 23908 23178 23857 23418 23604 23386 23283 23029 22434 22421 22409 22680 23026 23352 22741 59 5101 8528 8807 10021 8781 9555 10303 10464 11292 33155 28967 26537 26124 25197 24787 24389 24302 24008 24081 24016 24199 24206 24123 24035 24087 23746 10046 13437 15048 15214 16320 15950 16271 15683 16535 16675 29089 25868 26073 24940 24676 24247 24547 24218 24478 23535 24220 23676 24655 23712 24155 23461 23686 15050 17705 17844 18470 18250 18776 18408 18935 18489 38286 25795 25297 24491 24752 24041 24473 23736 24355 23281 23890 23254 23974 23705 23777 23246 23584 23453 20599 20167 21088 21148 21251 20674 21611 21004 21150 27001 24648 23967 24329 23428 23943 23569 23589 23415 23456 23814 23388 23501 23395 23909 22968 23621 18119 22743 21588 22124 22167 22240 22898 21512 22423 22248 24096 24403 22983 23414 23409 23058 24397 22957 23072 23623 22794 23496 24055 22559 23244 23464 22887 23766 23137 23309 23121 23435 22924 23705 23110 23224 23272 23121 23399 23650 22756 23361 23131 23348 22885 23803 23393 23187 23145 23427 23161 23400 22929 23691 23144 23140 22659 23313 22967 23501 22826 23273 23163 23805 23033 23154 22876 23372 22886 23480 22784 23114 22689 23477 23249 23664 23040 23044 22834 23284 22801 23461 22957 23450 22878 23154 22633 23122 22728 23276 23040 23663 23224 23785 23072 23403 22875 23240 22638 23057 22678 23024 22646 22853 22597 22836 22751 23210 22636 22931 22625 22913 22695 22953 22616 22903 22656 22947 22763 23109 22826 23422 23360 23847 23768 23760 23271 22956 22489 22461 22771 23364 23299 23265 22867 22958 22679 22399 22699 23614 23920 23492 22342 22524 22877 23425 23127 23035 22442 22648 23334 23535 23477 22772 22983 22912 23215 22876 22904 22713 23273 23205 22937 22771 23278 22845 22919 22637 23386 23100 23101 22752 23313 22784 22879 22925 23685 22743 23164 22839 22720 22472 23315 23191 23059 22748 23216 22557 23191 23090 23303 22666 23328 22696 23168 23164 23228 22645 23370 22361 22982 23168 23113 22880 23102 22475 23723 22639 23324 22551 23043 23088 23351 22648 23132 22429 23524 22684 23345 22204 23085 22983 22987 22708 23146 22983 23160 22828 23143 22528 23535 22561 23303 22772 23448 22731 23203 22764 23297 22880 23159 22744 23061 23204 22789 22930 22641 23298 22691 23067 22396 23728 22486 23037 22407 23723 22672 22827 22694 23433 22539 22914 22493 23623 22653 22837 22637 23460 22752 22804 23052 22999 23150 22745 23363 22901 22756 23042 22748 23236 22918 23077 22981 22987 23056 22953 23144 22869 22897 23053 22613 23433 22568 23221 22811 23173 23156 22944 22929 23039 22502 23468 22876 23141 22800 23237 22478 23285 23105 23597 22999 23466 22986 23515 23056 23655 23009 23169 22455 23228 22720 23346 22648 23145 23044 23566 22696 22963 22788 23389 22599 23647 22631 23477 22913 23061 23188 23349 22624 23354 22629 23449 22965 23077 22773 23084 22960 23410 22534 23267 22713 23405 23084 22921 22752 23323 22615 23330 23192 22997 23169 23333 22755 22983 23245 22955 22774 23203 22938 22976 23189 23216 22464 23270 22585 23415 23060 22980 23239 22535 23621 22897 23290 22902 23379 23203 22952 23431 22684 23065 22496 23885 22394 23271 22268 23986 22160 23133 22594 3817 7418 8276 10144 10529 11694 11710 12213 11387 43641 30133 26936 25798 25431 24446 11315 15079 15574 15879 16436 16021 17147 16693 16897 16723 29353 26263 26225 24877 24896 11011 18630 18596 19252 19380 19975 19200 19577 19299 19950 27812 25795 24592 25183 24600 24667 19787 21100 20921 21641 21037 21410 20943 21658 21520 27991 24812 24570 23654 23939 23603 21873 22071 22661 22372 22768 22340 22788 22162 22551 22032 24065 23366 23738 23154 23786 23248 23696 23132 23575 23121 23743 23469 23729 23271 23613 23181 23495 23054 23367 23044 23388 23071 23490 23212 23649 23396 23673 23265 23648 23332 23648 23309 23608 23256 23309 22901 23026 22571 23049 23315 24097 24183 23927 23325 22944 22496 23137 23624 23559 23079 22844 22612 23503 24079 23825 22784 22903 23513 23273 22915 22543 22844 23545 23563 22858 23393 23051 23608 22753 23372 23457 23201 23108 23365 22909 23107 23412 23488 22836 23448 22267 23074 23331 23337 23025 23415 22725 23264 23271 23312 22860 23382 22679 23485 23105 23159 23063 23350 22946 23590 22720 23441 23088 23208 23245 23173 22976 23173 23188 23418 22810 23319 22607 23741 
23989 23892 23116 22789 22069 22594 22983 23369 22979 22656 21804 22592 23356 23282 23244 22637 22832 22903 23119 22821 22696 22412 22972 23256 23077 22560 22856 23097 22946 22856 22693 22649 23510 22982 22705 22893 23145 22545 22689 22368 23347 23150 22870 22360 23275 22483 22841 22435 23556 22458 22988 22592 23172 22474 23084 22993 23457 22137 23243 22432 23047 22128 23616 22703 22919 22485 23122 22016 23360 22963 23156 22336 23450 21843 22895 22885 23567 22396 23469 22466 23007 22491 23565 21989 23246 22290 22870 22752 23805 22087 23312 22366 22884 22755 23311 22245 23342 22038 23148 22861 22900 22649 23098 22336 23536 22123 23225 22440 22689 22951 22727 22660 22923 22176 23810 21877 23349 22214 22694 23688 22208 22881 22157 22979 23141 22196 23079 21711 23831 22299 23058 22460 23078 23271 22351 22790 22005 23663 22516 22855 22730 22257 23189 22557 22699 22642 22976 22752 22769 22860 22464 23163 22676 22906 22289 23224 22455 22976 22635 23135 22904 22984 22583 22749 22919 22877 22449 22826 22698 22856 22375 22628 22766 22695 22485 22664 22828 22837 22544 22976 22865 22857 22317 22987 22630 22979 86 87 169 84 77 71 79 43653 32817 30704 28397 27502 26223 25688 24457 24698 24064 24883 23585 24175 23448 23752 22939 23366 22659 23257 22667 23104 22475 23112 22644 23255 22880 23719 22811 24046 23008 23952 22983 23843 22955 23899 23119 23205 22803 23669 23240 24128 23095 24216 22683 23345 22157 22214 22539 23043 23626 23062 22563 22132 22447 24091 22535 22168 22532 23191 22315 22635 22915 22377 22480 22781 22821 22663 22980 22362 23361 22587 23023 22617 22913 22936 23009 22723 22935 21907 22962 22727 23169 22573 23104 22316 23352 22583 22705 22720 22620 23040 23020 22430 23047 22427 23042 23019 23256 22187 22971 22686 22788 22480 23544 22528 22652 22321 23272 22290 22986 22617 23587 22318 22800 22446 23085 22534 23118 22178 23359 22791 23317 22456 22676 22421 22963 22342 23368 22438 23096 22200 22956 22653 23654 22826 23406 22368 22889 22065 22884 22298 22493 22246 23214 22503 23463 22407 23267 22155 22880 22093 22947 22158 23107 22360 23201 22734 23659 22904 23572 22976 23397 22921 23371 22737 23104 22659 23052 22572 23044 22533 23026 22407 22841 22134 22923 22326 22925 22267 22903 22391 22880 113 101 95 86 90 87 221 743 1060 43589 41269 34253 30026 28449 26989 26691 25729 25975 25223 24935 24026 23949 23016 23761 23963 24989 24651 24197 23467 22872 22654 23386 23643 23287 23367 23034 23137 23051 23799 23462 23346 22849 23181 23279 23122 22963 23031 22589 23173 23351 23691 22871 22928 22674 23303 22701 23017 22452 23259 23412 23889 23090 23283 22981 23572 22974 23201 22957 23932 22901 23130 22901 23474 22611 23130 22978 23735 22463 23352 22803 23509 22272 23419 23136 23312 22600 23441 22621 23019 23014 23727 22437 23511 22498 23143 22893 23521 22481 23553 22458 23434 23099 23124 22801 23303 22274 23862 22533 23367 22519 22887 22651 23796 22279 23654 22384 23466 22859 23146 22737 22991 22890 23357 22663 23352 22297 23609 22528 23240 22532 22881 22988 22936 22800 23587 22658 23680 22229 23363 22040 24014 22871 22951 22550 22592 23703 22353 22911 22115 23840 22329 23079 22212 23132 23200 22823 23195 22837 23393 22881 22546 23037 23204 22859 22835 23265 22768 23125 22291 23903 22432 23082 22468 23429 22499 23114 22560 23128 22958 22860 23248 22779 22762 22736 22944 23108 22577 23254 22656 23232 22345 125 94 1425 5045 7210 8335 9242 10218 11134 10837 43680 36053 31757 28421 27585 26128 25671 25319 25075 24252 24720 23956 24616 23252 24686 23442 24000 23779 23819 23032 24385 22983 23867 23111 23767 23066 23513 23034 23836 22586 23957 23052 23269 23088 23737 22667 24010 22679 23085 23156 23367 22725 23874 22485 23671 23047 23258 22603 23626 22403 23465 23152 23175 22664 23796 22352 23265 23118 23157 22753 23851 22612 23259 23113 23166 22467 23790 22704 23068 23202 23268 22265 24124 22583 22703 23587 23432 22380 24256 22288 23001 23537 22355 22746 23387 22133 23507 22101 23601 23088 22421 23789 23012 22231 24058 21909 23105 22033 24000 22336 22965 22205 23868 22776 22939 23075 22663 22778 22936 23453 23255 23407 23349 23245 23051 22898 22424 22876 22727 23186 22455 23125 23154 23080 22660 23093 22557 23280 23038 22678 22537 23001 22855 23387 22471 23302 22413 23673 22421 23175 22767 22983 22967 23079 22416 23377 22118 23720 22160 23132 22499 23265 22807 23007 22741 22997 22957 22948 22624 23158 22943 23115 22338 23253 22624 23272 22279 23361 22167 23620 22163 23201 22414 23477 22757 22942 22462 23285 22473 23553 22201 23355 3733 11200 12969 14925 15388 16401 16566 17762 16696 43654 33117 29154 26976 25610 24642 25091 23648 24938 23553 23687 23585 23755 22844 24807 23181 22795 22969 23914 22168 24092 23936 22884 22725 23425 23154 22464 23563 24200 22564 22585 22994 23025 22152 23709 23883 22972 22039 23033 23283 23137 22960 22594 23361 23274 22901 22668 22869 22928 23153 22851 22848 22842 23201 23114 23439 22893 22909 22366 22960 22746 23081 22827 23306 22853 23033 22439 22970 22405 22880 22358 23197 22562 23600 23133 23600 22981 23709 22944 23618 22777 23565 22727 23461 22728 23264 22479 23232 22632 23357 22752 23520 22704 23788 22889 23736 22849 23703 22924 23489 22608 23249 22405 22941 22244 23084 22332 23332 22650 23528 22491 23324 22337 23269 22493 23088 22135 22981 22629 23409 22841 23617 22874 23440 22541 22958 22231 23111 22636 23365 22359 23297 22147 22733 22664 23633 23374 23562 22071 22372 22743 23365 22357 22303 21880 23447 23693 23254 21939 22455 23073 22944 22402 22157 22286 23882 23384 22309 22315 23335 22328 22066 23159 23283 22846 22302 23103 22500 22704 22455 23332 22818 22536 22833 22784 22391 22943 23128 23116 22397 23129 22490 9924 16303 18434 18546 19936 19631 20028 20390 20555 20128 29760 25482 25225 24208 23845 23512 23876 22704 24044 22652 23541 22672 23199 22939 23592 22412 23447 22413 23228 23016 23051 22657 23056 22656 23632 22259 23456 22137 23577 22383 23351 22392 23040 22951 22849 22640 22992 22551 23281 22342 23240 22209 23534 22233 23141 22213 23576 22279 23193 22030 23538 22112 23328 22363 23255 22352 23298 22177 23498 22551 23254 22138 23328 22423 23149 22951 23221 22448 22928 22323 23131 22665 23152 22182 23505 22185 23264 21773 23857 21841 23298 21619 24104 21768 23200 21720 23977 21710 22886 21760 23747 22119 22962 22615 22426 22944 22123 23228 22276 22790 22656 22832 22769 22528 22983 22530 22583 22967 22539 23017 22192 23333 22463 22274 22805 22604 22557 22690 22535 23086 22247 23509 22121 22989 22459 22851 22589 22736 22513 23229 21960 23247 22477 22637 22760 23116 22134 23544 22160 23024 22519 22829 22306 22947 22148 23112 22057 23092 22391 22817 22320 23229 22018 23120 22399 22764 22599 23034 22281 23567 22135 23427 22679 22947 22171 23621 22160 23161 22432 22775 22245 23324 22067 23011 22600 22775 22284 23252 22165 23022 22440 22746 22359 23136 22026 22988 22447 22784 22376 22789 22138 22967 22523 22296 22287 23573 21717 22737 23492 22560 21993 23880 22108 22373 23495 23055 21552 23204 22935 22103 22814 23192 22022 22372 22538 23097 21632 22578 23284 22471 22694 22958 22887 22218 23141 22712 22500 23035 22764 22336 22858 22765 22512 22595 23002 22255 22945 22607 22585 22282 22869 22674 22553 22505 22664 22375 22865 22256 22848 22421 23101 22112 22967 22765 22784 22386 23415 22109 22967 22306 23095 22443 22626 22597 23104 22188 23213 22112 23059 21964 23523 21929 23276 22034 23345 22377 22881 22347 22762 22468 23415 22010 23021 22285 23142 21927 22993 22529 23478 22613 23356 22215 23447 22663 23532 22633 22949 21883 22712 22288 23143 22125 23309 22669 22875 22418 22713 22844 22732 22354 22856 22684 22945 22280 22993 22395 23455 21851 23273 21597 23952 21490 23107 21688 23910 21581 23109 21799 23331 22276 22112 22604 23028 22643 22193 21707 22419 22619 22946 22742 23813 22784 23874 22675 22935 22724 22828 22756 22992 22711 22842 22673 23032 22808 23117 22880 22983 22791 22884 22789 22811 22958 22644 23056 22521 22716 22007 22657 22804 23274 22345 23345 22518 23199 22482 22920 22272 22648 22109 22700 21944 22684 21974 22641 22056 22745 22027 22757 21949 22678 22089 22873 22469 22935 22761 23168 22609 23264 22400 23181 109 90 101 73 16 73 74 77 76 2088 43664 43700 36599 33144 29863 28944 27372 27031 26131 26098 25248 25331 24199 24738 23722 24376 23824 108 87 843 4700 7326 8468 10643 11525 12500 43587 43683 39327 33472 30465 29126 27632 26557 25447 26747 25691 26272 24848 24402 24042 24959 25318 24685 109 5717 10631 12437 14615 14899 16409 16207 17189 43658 40476 33229 29570 27824 26569 25451 25635 25231 25392 25067 24702 24432 24037 24161 24635 23936 145 10331 14739 16213 17288 18270 19281 18482 19635 19553 38160 30825 27983 26337 25936 24712 25378 24729 24569 24344 24116 23699 23925 24018 23760 23388 23739 12648 17936 18731 20324 19860 21495 20062 21286 20766 21306 29228 26197 24784 25083 23703 24882 23351 24209 23334 23783 23210 24168 22616 23666 23186 23442 23389 23673 22644 23765 22715 23561 23304 23504 22832 23797 22516 23767 23045 23063 22947 23565 22640 23176 23241 23540 22416 23061 22762 23473 22551 23145 23151 23385 22326 23240 22748 23384 22669 22622 23098 24020 23456 22813 22145 22936 23035 23495 22245 22274 22368 23712 23851 23813 22691 22377 21983 22856 23031 23381 22941 22656 22061 22225 22304 23329 23480 23717 23463 23168 23430 22869 23076 22487 22445 22499 22664 22685 22660 22855 22920 22717 22853 22509 22939 22506 23064 22690 23098 22800 22936 22542 22932 22505 22944 22521 23243 22629 22937 22249 22638 22069 22769 22353 23178 22835 23589 22880 23470 22309 22914 22052 23090 22599 23184 22523 23022 21762 22805 22106 23370 22870 23579 22176 22856 22316 23232 22400 23042 22342 22768 22733 23359 22828 23095 22090 23111 22433 23056 22311 22834 22695 23468 22186 22872 22536 23046 22366 22738 22744 23368 22237 22881 22619 22323 21992 23176 22829 22784 22427 23109 22357 22502 22678 23562 21935 23141 22490 22208 22502 23975 21814 22866 22669 22080 22476 23945 22096 22584 22748 22297 22941 23586 21725 23220 21923 22742 23569 22028 22928 22609 21784 23959 21965 22743 22667 22600 23118 22311 22838 22231 23077 22636 22791 22497 22443 23020 22487 22743 22828 22688 23024 22534 22870 22551 23253 22344 22836 22087 23213 22030 23089 22059 23204 22396 23074 22361 23127 22408 23015 22215 23232 22246 23159 22201 23429 21972 23191 21920 23389 22131 23073 22057 23443 22160 23158 21974 23630 21915 23134 21908 23542 21952 22930 22009 23427 21988 23148 21943 23392 22065 22993 21897 23333 22122 23097 22167 23479 22145 23157 22050 23324 22340 22872 22263 22673 22748 23044 22148 23165 22067 23019 23114 22816 22592 23208 22404 22763 22317 23148 22791 23714 23177 23716 22768 22731 21736 22481 22712 23385 22258 22215 22804 24014 22963 22226 22300 23120 22497 22387 23817 22489 22176 23367 21789 23853 22711 22298 23040 22034 23191 22844 22697 22673 22663 22855 23111 22486 22856 22759 22684 22944 22446 22683 22978 22298 23132 22864 22664 22474 23097 22562 22912 23173 22711 22294 23183 22577 22832 22848 23030 22165 23110 22450 23129 22881 22827 22531 22835 22725 22753 22498 22949 22763 22793 22616 22974 22772 22856 22440 23220 22532 22800 22180 23600 22247 23052 22310 23072 103 124 79 81 73 1465 2560 5475 4303 43634 43685 43607 35786 32420 29853 117 169 7063 9622 11852 13075 14289 14040 15488 43617 43690 41773 34967 31154 29986 137 8372 12732 16089 16585 17254 17755 18637 18758 19078 43685 36916 32681 30259 27247 1335 11809 17036 18034 18708 19328 20845 21340 21793 20961 39379 31005 28513 26812 26579 25995 17962 20208 21399 21224 20992 20759 21021 21677 21751 33760 28087 26755 25608 25575 25440 25240 24995 25007 24743 24825 24539 24725 24429 24723 24333 24559 24168 24463 23980 24101 23664 23949 23243 23669 23014 23700 23122 23568 22977 23502 23031 23637 23208 23900 23228 23797 22945 23655 22616 23395 22695 23809 23337 24031 23323 23795 22673 23364 22948 23682 22873 23501 22399 23685 23153 23920 22455 23503 22857 23543 22649 23278 22720 23757 22973 23084 22777 23573 22955 23185 22908 23792 22358 23547 22720 23224 22749 23850 22602 23349 22828 23345 22571 23755 22502 23338 22676 22951 22939 23689 22357 23538 22541 22969 23072 23139 22726 23228 21940 24103 22440 23100 22926 22359 23527 23271 22553 23095 22066 24179 21940 23511 22279 23274 
