# Supplementary material for: An Active Feature Selection Strategy for DWT in Artificial Taste
Source: Hindawi journal article supplement (doi:10.1155/2018/9709505), 2018-01-01
Supplement: f1 [file 9709505.f1.zip › maofengTea-hi-2.txt]

43472 43488 43484 43492 53 4777 17543 20380 20652 21833 21936 22741 22227 22583 22012 22400 22020 22738 22298 22892 22538 22995 22647 23049 22625 22709 22542 22759 22323 22257 21946 22043 21848 22104 21960 22237 22505 23132 23376 23283 23453 23795 23575 23576 22983 22478 22016 22100 22597 23132 23009 22720 22385 22480 22690 22603 23441 22983 22680 22446 23017 22784 22896 22486 22737 22864 23337 22556 22672 22568 23128 22562 22852 22288 23016 22824 23424 22467 22900 22620 23211 22436 22658 22521 23396 22642 22936 22464 23253 22391 22923 22377 23536 22737 22922 22464 23162 22484 22828 22820 23374 22193 23220 22444 22874 22345 23466 22416 22969 22569 23061 22017 23402 22706 22920 22480 22938 22186 23481 22404 23222 22469 23232 22609 23587 22264 23175 22464 22727 22965 22973 22503 22930 22129 23297 22643 22945 22532 22601 22784 23099 22655 22929 21974 23765 22065 23385 22250 23242 22931 22753 22566 22265 23591 22231 23029 22198 23603 22243 23032 22432 23396 22328 23084 22400 23192 22645 22935 22500 23373 22502 23156 22400 23377 22352 23077 22295 23319 22454 22936 22637 23029 22808 22745 54 14915 16713 18578 18462 19717 19262 19925 19729 19898 31094 25469 23754 23828 23188 23693 22640 23744 22691 23296 22943 23163 22701 23121 22642 23399 22288 23402 22661 23015 23040 23144 22596 23470 22470 22944 22944 23151 22440 23616 22549 22948 22830 23222 22225 23274 22626 22663 22664 23186 22311 23029 22375 23421 22281 23085 22930 23094 22582 23513 22717 22702 22709 23153 22445 22836 22633 23320 22409 22899 23071 23159 22309 23239 22767 22503 22807 23080 22686 22437 22480 23857 22781 22237 22707 23047 23164 22417 22279 23631 22898 22528 22102 22606 23541 22786 21966 23303 23008 22874 21964 23072 23720 23076 22138 22668 23011 22960 22960 22381 23168 22861 23052 22528 22656 22864 22976 22775 22721 22557 23402 22700 22919 22234 22976 22828 23145 22608 22919 22173 23165 22553 23431 22467 23036 22631 23087 22751 22944 22018 22936 22420 23511 22601 23168 22372 23030 22576 23033 22807 22854 22085 23044 22464 23525 22592 23168 22211 23168 22679 23152 22779 22931 22173 23043 22387 23479 22569 23079 22232 23005 22727 23169 22831 23164 22130 22854 22370 23399 22715 22784 22263 22807 22807 23057 22830 23122 22182 22881 22510 23296 22725 17961 19803 20661 20384 21320 21652 21685 22065 21560 34597 24025 23421 24453 23345 22924 22294 22609 23408 23074 23905 23160 22390 22205 22374 23593 23048 23442 22512 22125 22416 22751 23628 22876 23214 22551 22707 22536 23057 22983 23035 22423 22772 22662 23168 22745 23256 22742 22824 22456 23336 22958 23168 22848 22816 22259 22955 22488 23526 22594 23328 22453 22686 22455 23018 23008 23241 22609 22996 22117 22961 22298 23421 22432 23566 22539 23013 22200 22795 22544 23076 22885 23281 22467 23015 22072 22958 22445 23413 22404 23473 22569 22981 22293 23016 22553 23001 22992 23268 22486 22950 22263 23029 22402 23435 22617 23251 22336 22755 22432 23242 22813 23337 22619 22876 22257 22950 22464 23422 22738 23159 22549 22627 22440 22986 22888 23196 22437 22683 22330 23661 22812 22937 21954 22589 23356 23206 21914 23053 22906 22349 22537 23125 22208 22689 22896 22088 23416 22997 22191 23750 22163 22734 23126 22692 22999 22532 23184 22588 23076 22583 22761 23133 23075 22485 23000 22616 22496 22729 23270 22862 23010 22440 22721 22528 22934 22481 22976 22485 22863 22465 22914 22431 22848 22272 22872 22272 22999 22400 23088 22621 23310 16155 21968 21541 22297 21701 22285 21504 22087 21305 22350 24448 23953 22699 23483 23078 22990 22612 23469 22373 23718 22281 23242 22566 23077 22935 22849 22561 22839 22944 22864 22643 22865 22885 22838 22451 23138 22746 23212 22437 23306 22209 23543 22216 23088 22442 23304 22183 23082 22373 23332 22321 22970 22395 23433 22347 22947 22596 23046 22621 23406 22696 22735 22999 22488 22636 23170 22154 23693 22658 22382 22754 22617 22333 23844 22253 22728 23024 22196 22854 23761 22082 22573 22899 22677 22280 23810 23110 22213 22632 23160 22001 23132 23287 22537 22773 22490 23105 22245 22898 23010 23071 22464 22697 22625 22942 22469 22744 22844 23360 22561 22727 22436 22964 22624 23074 22384 22749 22424 23367 22937 23370 22461 22762 22304 22848 22358 23096 22490 23242 22418 22898 22192 23027 22720 23579 22781 23296 22470 22796 22113 22737 22423 23147 21813 23024 22435 23250 22464 23289 22621 23273 22641 23239 22501 23099 22449 22972 22331 22925 22345 23052 22353 22871 22187 22901 22303 22767 22377 22768 22406 22813 22393 22865 22439 22871 22475 22944 22511 23061 22499 23060 22631 23112 22720 23136 22706 23033 22827 23100 22752 22779 22489 20714 21685 21656 21336 21508 21523 22224 22121 22510 26220 24180 23796 23974 23795 23847 23468 23112 22620 22268 22122 22204 22373 22721 23187 22774 23143 22660 22976 22615 23175 22464 22617 22464 22968 22919 23365 22884 23329 22875 22972 22296 22771 22696 23112 22551 23031 22410 22667 22450 23256 22885 23223 22348 22821 22301 23164 22505 23133 22341 22705 22288 23378 22805 23285 22182 22919 22666 23034 22192 22977 22471 23516 22557 22900 22393 23264 22475 22780 22516 23472 22347 23049 22646 23024 22101 23136 22700 23329 22307 23044 22512 23123 22104 23424 22708 22763 22690 22967 22192 23181 22902 22711 22644 23040 22342 23016 22887 22758 22565 22894 22196 23322 22786 22577 22772 22541 22184 23658 22039 23137 22680 22235 23084 23165 22166 23126 22337 23084 23387 22133 23022 22637 22148 23693 22337 22743 22792 22144 23190 22938 22680 22637 22966 22727 23379 22298 23065 22753 22848 22942 22660 22731 22752 22480 23447 22266 23160 22392 22775 22987 22665 22728 22970 22400 23443 22176 23228 22393 23145 22801 22743 22588 23069 22555 23256 22234 23171 22149 23373 22459 23220 22281 22759 22768 23112 22486 23032 22172 23469 22262 23311 21010 22832 22098 22808 22045 22621 22674 22722 22469 22773 22950 23303 22523 23207 22197 23607 22199 23215 22184 23436 22615 23033 22468 22796 22984 22765 22588 22656 22903 22830 22657 22834 22760 22992 22603 22919 22547 23362 22476 23054 22100 23684 22097 23104 22264 23184 22529 22852 22469 22239 23595 22083 22986 22260 23307 22481 23000 22508 23122 22723 22749 22517 21928 23799 21933 23114 22103 23479 22772 22745 22903 22784 23040 22675 22954 22496 23213 22614 22842 22360 23271 22320 23083 22555 23116 22698 22900 22492 22758 22984 22717 22555 22742 22871 22906 22388 23085 22065 23274 22501 23059 22425 22638 22752 23255 22329 23184 22272 22832 22711 23205 22192 23191 22486 22791 22737 23349 22295 23112 22423 23030 22119 23128 22806 23287 22132 22984 22512 23118 22337 22961 22157 23004 22696 23532 22641 22980 22176 23168 22439 23127 22375 22805 22173 22736 22552 23195 22869 23405 22813 23264 22584 22827 22406 22765 22259 22708 22315 22728 22362 22902 22507 22705 22221 22477 22237 22966 23121 23719 23264 22400 21959 22464 22369 22861 22976 23153 22992 22818 22439 22493 22215 22178 22003 22169 22038 22174 22103 22181 21998 22094 22109 22222 22688 22484 22802 22304 22799 22487 23132 22872 23191 22976 23199 22640 22583 22474 22852 22695 22712 22936 23072 22212 22968 22511 22971 22681 22722 22502 23033 22368 23417 22528 22704 22441 23124 22541 22798 22801 23284 22215 22716 22604 23082 22529 23184 22191 22919 22276 23225 22764 23471 22795 23187 22536 22956 22096 22824 22120 22884 22257 23265 22454 22828 22391 23005 22352 23146 22668 23097 22324 22945 22192 23115 22168 22696 22172 22989 22518 23299 22840 23389 22648 22963 22448 22830 22315 22983 22560 23012 22480 22857 22103 22712 22656 23394 22827 23119 22344 22666 22536 23012 22813 22920 22283 22233 22812 23744 23377 22316 22007 23091 22741 23010 21959 22650 23475 23687 22744 22079 22816 22940 22848 21959 23054 23766 22510 22373 23028 22641 22124 22807 23387 22471 22823 22669 22987 22596 22652 22941 23021 22416 23027 22599 22615 22567 23372 22443 22843 22637 22986 22109 23263 22759 22840 22621 22884 22152 23377 22497 22893 22469 22967 22568 23383 22177 23104 22434 22997 22821 22755 22583 22576 22238 23388 22198 23222 21889 23013 22801 22805 22585 22680 22630 23157 22461 23123 22070 23392 22071 23169 22352 23104 22629 22969 22373 22695 22890 22816 22483 22801 22624 23080 22588 23021 22572 23104 22502 22328 22646 23063 22596 22784 22620 23034 22592 23053 22496 23031 22637 12611 17014 18750 19343 19944 20330 20436 20169 20753 43468 27321 23495 24193 22500 23502 22272 24091 22742 22980 23304 22437 23063 22171 23625 22713 22552 23200 18588 21344 20476 21991 21584 21041 22543 21331 21576 36922 24044 23808 22976 23255 23415 22528 23649 22888 23076 23261 22809 22817 23057 22632 23221 22388 55 21090 21571 22134 21984 21729 22638 21717 22288 22298 26940 23280 23767 22574 23335 22784 23185 22752 22835 22981 23271 22487 23656 22513 23194 22930 23040 16865 22512 21549 22520 22128 22459 21974 22764 21920 22739 23858 23478 22704 23233 22578 23442 22565 23504 22759 22752 22820 23350 22317 23382 22649 22888 22756 22076 21728 23217 22180 22772 22612 22902 22167 23235 22326 23408 23127 23156 22485 23577 22540 22834 22984 23048 22422 23468 22665 22695 22936 23193 22311 23128 22726 22709 22344 22919 22768 22213 22457 23779 22337 22535 23529 23026 21958 23388 22884 22087 22963 23255 21957 22952 22963 22631 22088 22752 23592 22362 22293 23608 23052 22074 22996 22760 22927 22364 22908 23044 23009 22216 23144 22770 22807 22489 22947 22761 22788 22490 23271 22709 22872 22338 22890 22891 23001 22167 23048 22636 23305 22288 22961 22866 23127 22077 23129 22492 23152 22232 23048 22903 23122 22054 23229 22444 23174 22117 23100 22648 22917 22245 23453 22541 22721 22416 23040 22456 22832 22362 23465 22174 23072 22663 23025 22185 23490 22585 22740 22664 23042 22411 22923 22369 23337 22144 22960 22807 23119 22018 23314 22512 22988 22244 22993 22817 22915 22168 23246 22632 22897 22451 23046 22516 22848 22549 23121 22268 22921 22581 22743 22562 23018 22444 22998 22194 22960 22704 22245 23441 22953 22100 23778 22556 22480 23591 22580 22325 23796 22120 22738 22812 22163 22773 22731 22305 23103 22119 23265 23004 21952 23272 23060 21940 23640 22706 22578 23341 22411 22869 22726 22904 22759 22588 22940 22727 22577 22688 22985 22839 23013 23205 22300 23160 22325 23296 22231 23108 22262 23248 22416 22870 22700 22874 22631 22695 22842 22787 22357 23002 22551 23195 22272 23435 22343 23063 22422 22957 22445 22807 22592 23256 22144 23472 22371 23031 22797 22880 22447 23328 22172 23207 22144 23047 22450 22749 22648 23235 22157 23472 22240 22976 22646 22964 22643 22632 22857 23026 22355 23222 22177 23203 22106 23479 22322 23049 22608 22944 22589 22601 22818 22856 22445 22883 22778 23000 22250 23324 22263 23096 22163 23296 22528 22882 22794 22741 22483 23284 22248 22732 23119 23040 21765 22944 22720 22694 21834 22458 23393 23209 22687 22137 21999 22801 22523 23906 22982 22827 22240 22037 22025 22646 23466 22958 23516 23094 22632 22568 22090 22017 22145 22309 22909 22784 22892 22961 23018 22925 23040 22953 23006 22926 23076 22960 22982 22848 22916 22680 23018 22727 23015 22679 22971 22660 23043 22621 23013 22540 22976 22329 22898 22297 22896 22375 23064 22512 23098 22501 23079 22629 23182 22699 23248 22754 23272 22631 23225 22695 23171 22772 23112 22809 22966 22810 23006 22758 22993 22584 23140 22347 23095 22208 23008 22151 22768 22178 22695 22192 22914 22436 23126 22597 23399 22492 23270 52 17227 18364 20684 19945 20949 19906 20904 20193 20560 32946 25084 22912 23519 22835 23417 18817 21403 21444 21942 21861 22032 21754 21991 21613 38264 24221 23376 22880 23107 22588 19041 21093 21744 21746 22177 22105 22633 22444 23224 22346 25298 23486 24198 22976 24023 16859 22532 22151 22220 21961 21834 21633 21976 22132 22453 24549 23384 23077 23152 23505 23278 23001 22402 22999 22464 22693 22151 22639 22244 22693 24461 23292 23085 23157 23026 23161 23143 23120 22994 23143 22982 23085 22600 23034 22412 22709 22288 22749 22349 22962 22336 22840 22560 23176 22711 23436 22679 23490 22488 23362 22380 23269 22355 23426 22328 23284 22400 23191 22375 22942 22272 22848 22092 22860 22396 22919 22341 23204 22630 23304 22669 23253 22784 23091 22694 23063 22515 23051 22295 22700 22343 22784 22349 22970 22510 23397 22646 23530 22348 23426 22428 23254 22099 23040 22845 22976 22484 22890 22240 22769 22159 22772 22304 22968 22708 23108 22730 23192 22913 23045 22904 22993 22741 23078 22480 22600 22191 22224 22025 22374 22602 23234 22880 23373 23072 23751 22740 23721 22562 22941 22445 22440 22059 22091 
21657 21433 22007 21643 21755 21537 22492 21539 21691 21623 22007 21808 21767 21384 22331 21635 22050 21191 22215 22004 22135 21185 21921 21534 22471 21655 21617 21632 21859 22009 21922 21376 22309 21698 22107 21411 21910 21190 21031 20586 21207 20885 21712 21312 22040 21446 21885 21327 21357 20839 21549 21286 21714 20985 21663 20856 21581 21388 21975 21057 21339 21126 21729 21130 21300 20972 21740 21716 21782 21005 21466 21426 21542 21552 21223 21237 21679 21740 21744 21008 21621 21443 21621 20886 21152 21985 22235 20744 21196 21811 21408 20579 21209 22026 22392 20844 21220 21687 21332 20685 22370 22093 20708 21600 21320 20857 21131 22520 21525 20946 21644 21425 21009 22123 21320 21432 21410 21465 21263 22003 21132 21671 21384 21437 21501 22017 21161 21794 21452 21681 21713 21347 21416 21617 21007 22088 20959 21888 21224 21472 21719 21420 21349 21593 21387 21975 21132 21751 20829 22264 20869 21902 21012 21953 21248 21671 21217 21680 21515 21685 21184 21640 21559 21629 21253 21507 21658 21482 21210 21385 21600 21376 21184 21541 21460 21783 21062 21864 21107 21896 20979 22113 21093 21646 67 1890 7689 10729 12525 13918 13431 15031 14576 15335 43376 29187 24999 24039 23543 23126 22494 22805 22289 22936 21449 23029 22393 21790 23019 21991 21890 23204 21609 22102 22356 21532 21992 22335 21387 22230 21952 21487 21903 22400 21303 21948 22637 21526 21805 22684 21949 21730 22542 21767 21959 21991 22151 21621 22049 21880 22081 21574 22069 21190 21190 21149 21870 21080 21333 21470 21649 20855 21444 21158 21832 20939 21872 21680 21663 21063 22137 21323 21361 21379 21745 21401 21511 20935 22113 21269 21584 20980 21684 21595 21685 20808 21696 21239 21755 20866 22045 21545 21779 20736 21661 21233 21883 21101 21527 21706 21662 21180 21434 21088 22226 21260 21385 20935 21738 21677 21787 20912 21511 21218 21962 21223 21170 21321 21541 21781 21654 21037 21361 21168 21971 21474 21514 21105 21545 21862 21673 20999 21061 21191 22273 21753 22029 21122 20663 21049 21452 22563 21875 21321 20842 21354 22429 21641 21843 21047 20899 21336 21442 22362 21728 21081 20885 21154 21749 21774 21613 21686 20833 21564 21238 22037 21383 21521 21121 21344 21529 21636 21681 21611 20994 21593 21112 22054 21413 21557 21056 21554 21379 21721 21733 56 8693 14549 15543 17011 16800 18149 17512 18251 17573 43366 28274 25297 23445 23393 22036 22785 22087 23075 22170 22708 21795 22280 21804 22416 22009 22618 21536 22201 21639 22685 21628 22711 21737 22024 21431 22414 22129 22560 21615 22126 21339 22456 21587 22722 21769 22227 21504 22003 21658 22260 21408 21488 20992 21153 21059 21716 21274 21953 21239 21328 21042 21133 21659 21740 21525 21442 20642 21125 21112 21681 21340 22574 21702 21544 20849 20695 21122 20916 22417 21871 21378 21127 20587 20984 21105 21863 21448 22472 21723 21632 21036 20650 21174 21290 22024 21308 21809 21064 21320 21066 21674 21745 21751 21616 21479 21047 21417 21223 21909 21285 22057 21386 21434 20983 21472 21712 21718 21479 21740 21095 21478 21220 22135 21227 22065 21126 21324 21094 21625 21627 21769 20897 21636 21089 22097 21102 21494 21606 21756 20974 22097 21400 21423 21753 21798 21344 22040 20960 21718 21460 21575 21244 21487 21680 21645 21257 21576 21693 21384 21305 21671 21095 22117 21157 21506 21472 21720 20829 21692 21618 22030 21665 21807 21236 21697 21287 21468 21220 21495 21393 21592 21520 21744 21704 21969 21770 22064 21751 22074 21760 21760 16981 18929 19047 19456 19395 19796 19933 20324 20337 20928 23634 21600 22663 22558 20920 21537 21856 21135 22552 20881 21496 21826 21215 22576 20752 21810 20846 22662 20868 21591 21541 21736 21624 21299 21757 21584 21883 21413 21869 21232 22144 21320 21580 21488 21884 21258 21674 21248 21993 21152 21682 21361 22057 21127 21591 21285 21753 21606 21683 21467 21573 21651 21561 21253 21924 20945 22171 21159 21588 21351 21798 21191 22246 21100 21164 21466 21592 21672 22166 21058 22000 21391 21652 21159 22226 21207 21440 21422 21806 20998 22229 21682 21369 21497 21798 21213 21707 21543 22231 21165 21452 21328 21866 21216 21595 21454 22179 21621 21537 21203 21628 21520 21818 21273 21463 21397 22083 21806 21875 21176 21393 21227 21613 21390 21802 21508 21367 21031 21170 21341 22023 22504 22723 21865 21355 20749 20791 21163 21458 21388 21633 21795 21923 21869 21819 21303 21106 20947 20919 20892 20889 20868 20960 21542 21301 21632 21216 21740 21312 21837 21450 21658 21725 21867 21597 21970 21565 21937 21449 21832 21509 21748 21352 21787 21493 21793 21214 21559 21195 21638 21132 21597 21091 21581 21072 21735 21229 21665 21174 21915 21424 18532 20039 20883 20444 20989 20517 21221 20489 21072 20462 23109 21764 22010 21527 22284 21696 22262 21816 22311 21748 22160 21607 21857 21316 21619 21152 21570 21243 21980 21496 22034 21309 21800 21206 21683 21036 21737 21344 21912 21824 22152 21728 21767 21193 21511 21539 21800 21483 21432 21176 21421 21483 22151 21957 22156 21571 21303 21162 21625 21912 21569 21139 20774 21495 22573 22214 21275 21090 21901 21607 21275 21040 21319 22413 22263 20901 21528 21832 21469 20866 21910 22522 21405 21607 21500 21861 21206 21400 21650 22153 21405 21594 21632 21460 21193 22155 21594 21655 21552 21793 20992 22034 21781 21591 21404 21912 21008 21985 21703 21602 21408 21936 21147 22213 21203 21824 21371 21593 21594 22155 21066 21971 21224 21486 21812 21681 21390 21856 21021 22128 21457 21856 21351 21738 21378 22264 21093 21917 21271 21533 21788 21623 21369 21797 21040 22211 21456 21824 21387 21543 21523 21952 21293 21713 21312 21831 21585 21697 21488 21621 21525 22080 21112 21832 21370 22053 21714 21527 21359 21259 21712 21943 21459 21762 20825 22288 21420 21771 21473 20992 22637 20994 21833 21448 20719 22571 20949 22091 21231 21738 21965 21192 20912 20260 22108 20574 21495 20888 21629 21847 21140 22998 21840 22111 21743 21638 21898 21730 21745 21573 21645 21377 22141 21165 22024 21252 22085 21506 21799 21383 21529 21764 21671 21376 21566 21703 21541 21447 21527 21678 21640 21450 21984 21425 22000 21345 21788 20983 22276 21047 21979 21153 21930 21491 21847 21269 21637 21689 21656 21287 21524 21728 21701 21463 21697 21515 21940 21268 21696 21169 22149 21344 21852 20966 22296 21040 21894 21193 22171 21083 21939 21434 21650 21745 21512 21492 21367 21912 21504 21660 21752 21680 21796 21442 21728 21504 22151 21305 21892 21701 21419 21941 21505 21707 21593 20788 22541 21496 21342 21891 21377 21025 22713 21609 21326 21976 21653 20720 22043 22480 21107 21514 22017 21585 21014 21259 22401 22598 21586 20928 21415 21973 21366 22099 21177 21607 21453 22159 21839 21856 21273 21588 21612 21880 21520 21680 21527 21561 20992 21596 21365 21979 21783 22112 21841 22266 21755 22316 21775 21989 21632 22103 21425 21916 21568 22130 21725 22375 21861 22217 21430 21685 21182 21904 21359 22136 21391 21745 21266 21688 21303 21806 21321 21908 21686 22301 21715 22304 21744 22296 21836 22366 21784 22321 21929 22278 21924 22330 21944 22363 21843 22308 21674 22031 21283 21557 21310 21897 21496 21761 21368 22347 21544 21536 21607 21799 21652 22057 21475 21879 21424 21863 22048 21825 21262 21872 21654 21666 21531 22403 21533 21137 20887 21846 21974 21688 20898 21224 22023 22746 22726 22543 21711 21431 20961 21045 21248 21686 21863 21590 21716 21832 21869 22068 22001 22094 22041 22092 22202 21745 22129 21600 22115 21667 22149 21636 21857 21585 21852 21341 21568 21305 21741 21732 22214 22162 22368 22023 22176 21415 21737 21564 22240 21582 21815 21513 21665 21297 22262 21913 22405 21558 21856 21282 21906 21669 21943 21456 21753 21358 22361 21850 22070 21256 22108 21579 21938 21180 21888 21692 22482 21658 21692 21520 22144 21308 21650 21748 22475 21410 21763 21620 21992 21285 21941 21996 22231 21226 22071 21569 21898 21376 22415 21717 21605 21696 21904 21240 21947 22113 21807 21653 22072 21603 21653 22082 21959 21451 22024 21385 21883 22021 21707 21707 21993 21318 22105 21917 21617 21925 21380 21866 22320 21127 22113 21127 22457 22580 21177 21940 21056 22311 22135 21524 21730 20947 22825 21159 22181 21415 21339 22685 21268 21970 21060 22605 21171 22097 21415 22157 21541 22066 21456 21737 22046 21666 21730 21473 22062 21750 21581 21517 22039 21797 21565 21549 22115 21780 21599 21640 21923 21939 53 9220 12919 14840 15285 16215 15594 16551 15872 43364 32225 26491 23646 23795 22690 22983 22461 22518 22023 22323 22188 22467 21740 22699 21561 22385 61 8509 14853 16963 17566 18156 17856 19145 18090 19136 43369 28787 24293 23569 23126 22788 22125 23032 21773 22603 21920 22487 22022 22077 22248 22327 21835 61 15280 18278 18709 19421 20571 20727 20440 20891 20531 30125 24816 23457 22928 22996 21913 22949 22225 22189 22274 21639 21765 22083 21058 21873 21385 21712 18284 19243 20052 20914 19815 21339 21025 20041 21472 21301 22576 23273 22287 21504 22952 21979 21054 22760 21251 21437 22775 21317 22027 22065 21921 21543 22384 20352 21442 21216 20996 21094 21463 21020 21335 21353 23525 22070 22507 21526 22026 21941 21880 21671 22168 21292 21952 21740 21888 21396 22375 21380 21801 21924 22103 21228 22215 21689 21678 21459 22133 21516 21753 21335 22350 21197 21906 21826 21929 21537 22375 21363 21877 21984 22076 20997 22154 21542 22053 21216 21905 21887 22018 21582 22311 21604 21602 21655 21899 21527 21818 21441 22365 21473 21682 21801 21980 21348 21612 21494 22197 21549 21459 21757 21975 21671 21697 21566 22272 21716 21712 21319 21801 21793 21652 21731 22373 21623 21348 21687 21915 21552 21224 21473 22771 21792 21035 22025 22021 21029 21488 21703 22423 21100 21307 22640 21940 20833 22243 22074 21373 21640 22010 21685 21141 21621 22291 21029 21496 22616 21623 21600 21680 22109 21396 21849 21472 22171 21309 21779 22055 21729 21431 22045 21657 21981 21314 21913 21888 22010 21278 22332 21712 21477 21689 22157 21184 22197 21593 21588 21763 22197 21184 22304 21578 21621 21820 21845 21577 22366 21229 22008 21705 21796 21375 22217 21223 21919 21668 21927 21553 21680 21657 22185 21120 22292 21433 21856 21822 22032 21520 22314 21303 21532 21927 21825 21564 21879 21333 22037 21104 22471 21377 21933 21480 22024 21673 21718 21933 21637 21510 21650 21881 21647 21591 21927 21629 21957 21386 22205 21297 21900 21319 22180 21611 21772 21661 21853 21760 21495 22144 21725 21709 21864 21616 22099 20967 22746 21554 21614 22720 21205 21635 22431 20992 21745 21499 21433 21904 21312 22471 21817 21121 22875 21485 21460 22776 21200 21609 22146 21353 22019 21015 22145 21821 20823 22282 21332 22176 21202 22265 21533 22121 21929 21712 21719 21567 22064 21880 21379 21913 21541 22139 21280 22400 21315 21872 21270 22151 21655 21668 21905 21835 21458 21860 21440 22056 21431 21827 21495 22263 21370 21815 21756 22147 21163 22050 21418 22448 21519 21760 21281 21888 21896 22023 21903 21897 21189 21672 21362 22080 21553 22435 21495 22163 21461 21700 21296 21562 21354 21975 21828 21942 21993 21958 22008 22225 21833 22048 21544 21976 21542 21997 21477 22016 21661 21787 21273 21652 21348 21796 21352 21749 21392 21715 21328 21678 21284 21639 21257 21636 21330 21591 21312 21811 21353 21690 21131 21632 21187 21632 21348 21788 21815 21973 21480 21954 21761 22151 22151 22080 22401 22004 22684 22081 22764 21977 22798 21850 22517 21653 22278 21728 22203 21461 21819 21477 21282 21047 21528 21290 21763 21399 22116 21495 57 5767 12135 14525 15696 16202 16345 16526 17280 19392 35917 27770 24668 23317 23060 22484 11736 18535 19335 19234 18738 18546 19529 18901 19694 40520 28288 23921 23782 22559 22848 12265 17600 18388 19667 19187 20130 19665 20553 19991 43369 26818 24708 23508 23276 22798 13546 19037 20220 20441 20980 20500 20996 20411 21018 20632 23949 22411 22453 22125 22548 19313 21371 21165 21811 21085 21936 20922 21643 20920 21518 22605 22573 21988 22147 21667 22219 22006 22294 22074 22192 22197 22012 22067 22043 21863 21899 21657 21690 21421 21667 21463 21678 21389 21751 21507 22033 21782 22480 21888 22749 21943 22848 21943 22888 21834 23023 21836 22784 21618 22430 21588 22027 21406 21268 20900 21180 20935 21345 21381 21655 21767 22054 22647 22247 22840 21941 22764 21649 22320 21587 21902 21312 21805 21239 21895 21464 21995 21893 22103 22016 21931 22069 21984 22052 21926 21971 21878 21706 22023 21549 21810 21479 21607 21336 21856 21662 21913 21635 22164 21558 22456 21637 22497 21492 22282 20894 21888 21376 21821 21158 21896 21368 22085 21415 22241 21701 22151 21963 22087 21938 21944 21733 21721 21367 
21377 22200 22105 21101 21285 21568 22347 21082 21505 22666 22024 21104 21492 21665 21959 21939 21268 21755 21567 22108 21508 21703 21817 21785 21864 21568 21568 22082 21729 21914 21265 21215 22119 21989 21258 21553 21633 22224 21704 21553 21355 21848 21997 22190 21367 21958 21504 22133 21433 21845 21776 22205 21526 21829 21381 22400 21572 21716 21718 21995 21532 21719 21580 22214 21575 21540 21367 21895 21977 21952 21356 22246 21699 21786 21513 21600 21096 21940 21889 21974 21381 21859 21671 21857 21421 21694 21879 22123 21337 21872 21595 21896 21156 21692 21804 22145 21318 21835 21591 21920 21400 22322 21414 21775 21584 21965 21157 21975 21872 21777 21591 21880 21404 21917 21987 21806 21545 21815 21049 22195 21671 21593 21657 21852 21152 22184 21365 21952 21606 21641 21848 22016 21389 21973 21458 22016 21747 21792 21645 21728 21730 22049 21507 21899 20884 22710 20978 22250 21265 22090 21856 21643 21536 21296 22583 21046 21971 21000 22599 21059 21989 21116 22565 21193 21981 21373 22321 21339 22040 21216 22171 21420 22045 21375 22240 21392 21807 21417 22101 21674 21600 21921 21514 21808 4045 12640 14868 15765 17286 16849 16802 17691 17443 43328 25319 22275 22258 21735 22263 21355 22004 21219 22101 21608 21781 21894 21682 21637 22247 21228 21895 21753 21652 21591 21628 21508 21848 21216 22045 21719 21689 21423 21943 21291 21801 21563 21975 21237 21816 21815 21512 21621 22188 21332 21889 21876 21940 21264 22203 21660 21572 21490 21981 21369 21696 21485 22161 21329 21839 22004 21879 21252 22097 21705 21720 21391 21875 21809 21586 21509 22167 21479 21609 22419 22151 21136 21271 21465 22720 21420 21116 21751 21980 21904 21159 21336 22739 21946 21159 21277 21891 22274 21271 21096 22520 21998 21651 21017 21576 22134 21626 21408 21527 21746 22003 21697 21408 21869 21653 22102 21485 21455 21798 21928 21764 21533 21428 22154 21701 22203 21519 21718 21818 21891 21907 21874 21131 22021 21552 22121 21623 21704 21431 21868 21952 22043 21476 21770 21403 22116 21543 22284 21612 21635 21504 21928 21956 22065 21352 21665 21283 22266 21654 22253 21560 21649 21657 21908 22026 22133 21466 21789 21400 22189 21522 22244 21555 21542 21280 22187 21869 22099 21778 21614 21660 22156 21604 22127 21465 21611 21351 21843 21928 22031 21770 26 15991 18168 18599 19497 19074 19767 19249 18812 18873 26357 23316 22589 21380 21216 21428 22231 21803 22482 21687 21237 20866 21508 22226 21920 21921 21345 20905 21569 21504 22744 21959 21733 21511 21320 21806 21540 22304 21623 21419 21382 21495 22027 21912 21972 21723 21275 21603 21666 21986 21713 21922 21481 21568 21552 21913 22041 22083 21724 21792 21216 21776 21520 22264 21679 21909 21267 21638 21415 22155 21852 22016 21749 21977 21258 21589 21301 22023 21473 22219 21648 21762 21228 21715 21493 21930 21766 21999 21793 21985 21370 21687 21433 22171 21512 22358 21643 21735 21243 21745 21624 21840 21914 22137 21383 21724 21267 21843 21486 22375 21709 22194 21344 21611 21598 21866 21913 22049 21519 21729 21315 21878 21421 22365 21664 21892 21188 21624 21808 22043 21456 21330 21088 22345 21864 21964 20836 21667 22224 21134 21524 22594 20980 21952 22504 21313 21676 21911 21197 21981 21161 22211 21873 21483 22375 21253 22026 21385 22149 21656 21876 21698 21609 21728 22197 21602 21669 21857 21705 21385 21421 21707 22096 21934 22245 22095 22169 21926 22248 22112 22281 22057 22215 21975 22200 21760 21949 21577 21713 21451 21649 21223 17589 19677 20380 20116 20441 20063 20681 20327 20801 38955 22696 22128 22382 21341 21907 21701 21751 21927 21788 21376 22051 21323 22343 21237 21810 21395 22304 21504 22016 21522 22164 21625 21961 21659 21958 21701 21679 21506 21796 21845 21984 21565 22080 21408 22169 21440 22038 21550 22119 21338 22042 21504 22081 21504 22038 21351 22276 21299 22051 21384 22312 21301 21952 21754 21317 22375 21598 21232 22050 21298 21777 22599 21257 21529 22174 20805 22428 22183 21091 21504 22187 21017 21772 22581 21434 21208 21856 21442 21303 22513 22230 21040 21686 21914 21584 21685 22055 22083 21367 21829 21793 21877 21648 21609 22080 22054 21673 21577 21693 21888 21777 21909 21328 21667 21873 22276 21847 21743 21280 21847 21488 21927 21639 22032 21341 21696 21443 21990 21854 22391 21882 22135 21312 21639 21266 21660 21391 21973 21658 22093 21696 21937 21465 21784 21293 21825 21504 21938 21514 22144 21716 22215 21811 22187 21833 22328 21904 22345 21901 22496 21877 22373 21837 22400 21938 22343 22001 22231 21981 22358 21934 22263 21965 22233 21959 22301 22049 22238 21890 22298 21811 22136 21713 21996 21549 21813 21596 21904 21415 21268 21001 14632 20125 21035 21208 21479 21432 21483 21049 21327 20955 23795 21678 21848 21253 21248 20910 21189 21304 21871 22258 22541 22576 22472 22226 21895 21965 21542 21543 21445 21637 21672 21920 21763 21779 21634 21961 21504 21664 21293 21603 21617 22247 22033 22002 21543 21530 21528 22006 21627 21805 21665 21623 21421 22160 21947 22309 21767 21769 21249 21900 21639 21893 21594 21565 21633 22246 21841 21816 21379 22102 21605 21936 21219 21868 21830 22177 21237 21952 21523 22355 21273 22240 21943 21675 21391 22153 21438 21764 21209 22288 21798 21734 21573 22000 21510 21897 22056 21894 21476 22069 21465 21700 21961 21937 21326 22044 21539 21591 21952 21934 21500 21945 21332 21801 22229 21349 21811 21731 20949 22728 21906 21227 22061 21485 21617 22654 20834 22106 21268 21390 22656 21237 21888 21771 20999 22465 21957 21083 21979 21480 21692 22121 21597 21781 21565 21383 22211 21477 21831 21632 21452 22065 21623 21803 21825 21318 22312 21386 21868 21560 21560 22044 21720 21760 21812 21303 22295 21483 21943 21539 21816 21905 21700 21781 21952 21545 22281 21319 21999 21312 22212 21686 21918 21644 21815 21824 21963 21482 21875 21253 22396 21212 21432 20967 21872 21514 21792 21284 21524 21655 21578 25345 22135 21856 22171 21452 21972 21312 22358 21292 22121 21199 22090 21639 21869 21531 21736 21991 21600 21659 21644 21934 21656 21723 21703 21849 22035 21728 21870 21558 22301 21345 21959 20917 22729 21066 22233 21195 22413 21692 21835 21670 21109 22582 21058 21959 21192 22400 21277 22043 21579 22272 21799 21465 21751 20864 22758 20928 22160 21381 22075 21613 21828 21707 21833 21885 21745 21763 21712 22050 21378 21937 21389 22157 21440 21975 21716 21853 21856 21811 21573 21548 22029 21672 21708 21650 21978 22119 21467 21936 21411 22169 21755 21767 21622 21856 21568 22316 21372 21977 21539 21705 21655 22344 21369 21915 21586 21957 21308 22423 21685 21733 21403 22125 21392 21659 21417 22304 21923 21970 21386 21833 21772 21938 21456 22007 21192 21770 21709 22400 21747 21902 21320 21895 21677 22048 21592 21815 21552 21841 21351 21521 21259 21873 21713 21856 21694 22114 21868 22326 22054 22296 21976 22368 22056 22323 22045 21784 21015 21162 21300 21685 21987 22053 21456 21180 21008 21793 21987 22426 22508 22754 22578 22826 22217 22353 22146 22247 21985 22220 22108 22403 22208 22280 22041 21915 21944 21724 22055 21760 21954 21361 21447 21519 21738 21601 21839 21869 21675 21584 22183 21767 21796 21687 21841 21665 22164 21400 22011 21473 21847 22057 21722 21607 21976 21605 21632 21671 22321 21905 21881 21575 22122 21579 21753 21337 22067 21936 22379 21715 21797 21216 21500 21509 21485 21544 21864 21599 22091 21655 22123 21670 22097 21473 21905 21391 21712 21441 21898 21557 21802 21655 21977 21495 22036 21641 22151 21685 22080 21504 21799 21152 21779 21304 21696 21491 21960 21856 22272 21798 21969 21321 21633 21632 22079 21607 21909 21320 21531 21479 22102 22049 22387 21923 21505 21269 22060 21780 21650 21043 21136 22105 22804 21811 21034 21605 22229 21497 21303 20836 21814 22582 22071 20976 21865 21920 21719 21017 22244 22456 21235 21335 22071 21773 21324 21901 22057 21988 21511 21981 21767 21529 21593 22201 21729 21607 21780 21806 21319 21989 21997 21603 21595 21942 21478 21737 22023 21666 21674 21929 21397 22021 21816 21699 21750 21771 21376 22342 21375 21966 21483 21664 22004 21716 21657 21949 21242 22320 21532 22033 21504 21688 21916 21682 21639 21920 21798 22087 21563 21832 21212 22329 21344 22167 21341 21871 21729 22005 21617 21698 21832 21725 21656 21827 21836 21837 21665 22033 21783 21867 21649 21876 21801 21878 21753 21700 21788 21832 21700 21355 21744 21872 12413 15379 17106 17607 17833 18071 18217 18583 18197 36983 23592 22359 21059 22774 20942 21751 21336 22140 21701 21171 22571 21005 21526 21573 21700 22233 0 18834 18396 19339 19972 19150 19952 19495 20263 20296 26670 23530 21605 21730 22064 21467 21908 21456 21821 21700 21414 22016 21696 21527 22091 21280 21785 14537 19752 20328 20205 20411 20748 20139 20867 20792 20402 24072 22374 21465 22358 21541 22044 21942 21667 21496 21719 21376 22032 21331 22004 21687 21576 21796 19515 20248 21493 20966 21260 21463 21351 20999 21785 43233 22771 22192 21838 21513 22262 21346 21884 21637 21662 21463 22112 21204 21817 21777 21605 21409 22048 20405 21537 21038 21785 21392 21578 21263 21860 21079 25673 21979 21744 21559 21959 21302 22054 21657 21761 21477 22060 21470 21665 21504 21902 21331 21861 21888 21613 21568 22528 21479 21442 22469 22201 20967 21995 21903 21593 21036 21808 21852 21126 21523 22170 20824 21602 22349 21253 21507 22711 21856 21007 21804 22028 21805 21036 21581 22444 21556 21645 22130 21712 21480 21597 21768 21888 21544 21611 22110 21648 21619 21745 21895 21655 21639 21384 22221 21735 21533 21548 21763 21942 21847 21339 21972 21581 21664 21412 21874 21862 21785 21572 22176 21700 21612 21464 21828 21812 21774 21306 22287 21620 21645 21757 21986 21459 21728 21472 22314 21426 21997 21880 21963 21099 22212 21691 21669 21560 22016 21445 21708 21406 22193 21415 21908 21967 22009 21157 22240 21664 21771 21412 21959 21728 21711 21564 22304 21703 21529 21527 21891 21812 21760 21454 22309 21447 21735 21895 21903 21526 22321 21592 21815 21911 21901 21361 22294 21400 22028 22108 21431 21789 21652 21185 22028 21242 21637 21860 21205 21628 22160 20826 22552 21446 21372 22621 21525 21517 22780 21035 21617 22016 21020 21576 22060 21062 21886 21482 21287 21893 21296 22090 21728 21719 22051 21600 21768 21475 21961 21677 21605 21760 21738 21907 21386 22293 21353 21916 21366 22391 21386 21751 21625 21979 21731 21752 21900 21620 21607 21416 21984 21889 21525 22092 21366 22096 21315 22205 21605 21639 21911 21732 21494 22202 21206 21920 21479 21897 21661 21575 21843 22064 21253 22352 21313 22157 21879 21765 21510 22108 21303 22038 21237 22118 21644 21749 21888 21659 21546 21704 21671 21927 21317 22371 21251 21934 21305 22080 21633 21895 21881 21578 21667 21529 21869 21891 21516 22022 21543 22007 21233 22325 21308 21816 21591 22073 21740 21549 21998 21996 21160 22057 21781 21590 21214 21850 22309 21309 21166 22529 21899 21837 20941 21347 22027 21725 22558 22208 21415 21147 21186 21671 21425 22765 22016 22134 21479 21259 20887 21356 21297 21767 22222 21795 22537 21732 22151 21812 21966 21725 21903 21552 21568 21590 21560 21552 21557 21504 21652 21478 21671 21288 21454 21303 21569 21393 21536 21383 21533 21396 21660 21522 21806 21459 21872 21400 21714 21221 21534 21236 21556 21275 21530 21344 21539 21354 21821 21539 21728 21377 21846 21554 21927 21590 22056 21707 22097 21700 22205 21760 22374 21633 22307 21426 22266 21511 22395 21456 22133 21413 21891 21460 21824 21249 21664 21259 21952 21248 5604 14944 17419 17927 18657 18557 18797 18825 18908 18596 27313 22225 21943 21351 21580 27 18243 18981 19687 19690 20333 20057 20554 20032 20686 27952 23047 21753 22390 21472 22072 18679 20205 20000 20284 19945 20216 19974 20334 20313 31473 22420 22159 22198 22195 22135 19246 21665 21371 21974 21327 21766 21181 20856 20752 20482 22010 21220 21191 20960 21198 17623 21319 21604 21752 21609 21712 21578 21504 21447 21312 22261 21653 21620 21522 21460 21466 21818 21752 22055 21738 22153 21647 22196 21616 22087 21483 21952 21568 21707 21200 21773 21367 21714 21156 21639 21265 21888 21712 22073 21888 22016 21897 22048 21867 22062 21825 22029 21851 21913 21885 21891 21691 21880 21514 21684 21321 21629 21198 21552 21234 21673 21460 22053 21613 22300 21568 22381 21458 22211 21478 21975 21621 21821 21308 21780 21124 21833 21453 22064 21767 21975 21919 21997 21815 21999 21859 21906 21849 21859 21673 22140 21665 21748 21344 21443 21361 21572 21394 21765 21639 22116 21711 22238 21504 22345 21573 22246 21677 21776 21114 21073 20807 21171 20919 21371 21465 21929 22156 22124 22583 21888 22454 21611 21677 
41418 40791 39786 39111 40832 33645 41998 38840 32795 34886 38407 38761 42970 34951 38051 37876 40435 36189 33804 39499 32841 35109 36419 36025 36881 33432 33224 39019 35561 37440 40368 40616 40045 38568 40409 33561 34081 40576 35296 33283 41432 36940 38643 40706 41943 38286 32661 39751 42425 37048 35777 40768 33253 36448 41618 42576 33843 35161 35344 38519 33232 35376 33728 40595 33974 33031 41564 37575 38333 37816 41618 41410 35382 35987 32880 38573 35831 34662 41077 40540 34097 35161 41752 38199 34816 35155 39104 42076 34200 35557 41106 36962 35840 35320 33632 43048 33445 34304 36896 39190 40776 36821 33874 37704 41200 36826 34678 34424 33768 38912 40405 36292 41944 37860 38443 36487 33321 36370 38268 40616 35117 33882 34504 36779 39168 40442 41844 37974 34196 34316 36608 38312 41917 38445 42521 38552 35895 35884 34549 35240 35372 38776 32888 37232 36352 35624 37442 41228 40597 39544 36890 34525 32912 40404 34453 38105 38258 37606 34474 38236 38496 39176 34033 39733 38555 41945 41944 41691 38945 40043 40518 42332 39243 42103 41136 41792 36752 42081 39809 34990 33817 37355 32933 35961 31433 30404 34027 33906 38552 34219 33587 33091 30111 41080 43117 41541 41418 35926 41416 41834 38746 40238 39735 34198 35878 37192 34872 34232 41127 40475 37537 35905 34443 33907 34274 32617 36536 39881 39161 35624 35013 42285 38210 40903 36464 33677 38165 40457 36524 36519 32770 34152 40346 41323 37254 37111 37749 40240 40964 34891 33468 42624 38680 41774 35169 42887 40325 41280 37082 38536 37376 40230 39572 35379 35268 41893 37384 36288 33713 32681 40102 43040 34473 42665 40373 39123 40730 42851 35840 42061 39317 36096 38294 37232 39554 41347 36221 37872 39572 40866 37396 41120 40796 38935 44000 38938 34632 37773 33681 39808 34528 41657 33443 35525 38515 35120 41654 37440 34640 39441 43093 43046 36488 37591 35706 33233 41938 40304 35368 40704 33356 35269 36407 37190 37416 37064 39188 38704 33347 39633 34578 35046 42261 37323 37797 38986 42745 36099 41961 39895 33569 41184 34421 34240 32453 37398 37929 39085 41472 34877 40578 41603 34831 41250 33665 34295 34554 37236 38648 40039 42789 36474 41783 40853 33142 40853 33664 33109 40249 40662 37376 39536 35962 34296 34550 39992 34170 39936 42786 34572 41456 36958 37620 38928 35926 18018 35824 38320 32679 31829 37350 35216 39350 35097 35564 43968 42353 34656 41408 40129 42284 41369 36585 43364 35429 40294 36260 32679 40632 37561 37520 41304 36913 33574 32407 35762 38080 35642 32889 40793 36592 33159 41235 34656 42081 41909 43408 39054 37504 38125 35626 40592 34277 34507 38178 35316 37416 42829 33729 33102 37335 38866 39403 35616 35884 39876 35884 32759 41096 35320 37367 40468 34570 42048 40347 37059 38330 35888 38230 40396 34089 40779 38889 42727 41192 34533 35509 40208 35537 42904 37966 35856 38696 36131 38240 41745 35368 42240 40640 32994 42016 34789 35609 40496 35840 34263 36408 37481 40032 41907 35740 40416 36925 42971 42830 35690 40389 41344 34512 34040 36908 37512 38856 33272 35290 40960 37385 42282 42695 34825 37016 39691 34452 36072 38912 42400 41357 38754 42192 37184 38099 35963 34732 40584 39392 33104 33957 37377 37741 43713 41224 35129 37457 40050 38569 39557 40875 37219 42957 42816 40596 38807 41817 40228 34726 36985 35051 34113 35205 40534 34150 34667 36743 35254 41623 42484 35612 39237 37952 41207 39863 40406 37815 41144 39688 41452 39244 40992 38517 40624 35688 38004 33792 35112 42433 34704 40202 32276 34087 41431 38962 42423 38816 34368 41096 35623 35744 35330 39623 42720 41750 37639 35226 35889 37701 36141 41344 39136 41361 42337 40643 36436 41783 41634 32806 38152 32973 39913 34533 37993 34817 37936 35239 35074 32587 35890 36744 38154 33761 38937 41888 40480 42316 39016 33639 39698 41477 39028 32717 38996 32672 38576 41644 41361 41105 39137 41716 41835 41136 37956 35940 41016 42732 34382 40052 38976 40832 36055 34386 40192 33296 40230 35757 42857 40761 38929 32696 40362 38024 35959 34086 42105 40183 36896 42205 41280 44032 41255 38171 35088 37430 33664 34894 39000 39401 41872 36789 36060 37164 34344 34074 38956 39065 34954 33655 35057 36903 35848 37404 41016 34977 36980 41144 37079 35938 40393 37043 42705 38022 34554 38407 41528 35168 42273 38677 37084 42728 37495 40089 40929 34711 40264 34906 41861 38448 34731 39453 35043 37625 42658 36200 40870 36633 32584 37528 32944 39576 35431 40823 36568 40556 36807 41805 37412 42105 37688 43508 37496 42457 37030 42354 37943 42192 38720 41165 38631 42304 38099 41536 38447 41096 38323 41749 39061 41280 37296 41540 36599 39898 35415 38464 33601 36274 34011 37083 42177 40628 37842 31761 38861 38244 39988 43028 42505 43243 38585 41463 37618 37359 35062 36643 40309 40199 37021 39784 40964 37459 41222 33902 33717 43111 41112 37568 38272 33367 33234 42160 34635 34632 37290 35772 35920 34180 37934 32618 34336 40774 34260 34053 41126 38825 38582 33504 32953 32800 38429 34607 36312 34628 34344 42097 40160 38165 41737 36138 35830 40090 37456 34529 37152 33959 33581 34051 41009 36844 36378 41569 39760 34279 37494 40184 37209 36596 40268 40548 37904 33103 41920 40791 41066 38168 35052 41863 40278 42631 35963 40013 41344 36416 35608 33620 38224 32900 37104 38940 37346 42672 39450 42788 35349 38012 37776 41301 39080 33371 33852 37620 37898 43092 38192 41212 36432 40967 41662 36580 35579 37179 35762 37284 40351 39353 43124 34473 35093 35773 39552 40550 42008 35003 40312 37120 35975 37690 43212 38330 38816 38486 42804 35383 39760 34268 35882 33716 41568 40944 42993 36967 34136 42311 39281 34592 36257 36418 41009 41810 41955 37303 33489 33259 38709 35456 35456 36244 40960 41764 43201 38256 33320 36188 37271 35109 35920 37683 33362 41168 41361 38962 40908 40816 35242 37560 34506 36426 36282 38183 42857 37440 40320 42880 40377 42346 37808 36961 32937 35744 40528 33130 34535 33639 42625 40349 36876 40397 42645 38378 40864 42416 41051 40012 40267 39544 34652 37082 33264 35378 38475 33930 34636 34374 37736 34592 35474 35257 36761 38756 35437 37133 33513 41512 41512 38353 36941 35880 38393 41104 40192 42970 35449 36641 34816 38874 34253 38112 38208 39802 42484 40986 39144 33965 40839 36516 42585 36216 35973 36197 36740 39937 41808 39578 34496 36358 35356 36548 37415 35694 35712 35075 38761 41570 37927 41912 40448 42310 38578 35360 36916 36752 36359 33669 33208 38624 34832 35200 34352 38161 39941 42889 37877 42058 40490 36192 35862 34304 36628 33385 41592 41969 38503 33350 35097 34597 41861 41953 37828 33816 37866 41008 43136 35351 35575 41920 40192 41767 35025 41984 41632 37837 38149 41767 36840 35887 37681 42355 38995 39840 35968 35355 42267 36055 37424 41015 37537 35048 38638 33954 36391 33225 36476 41531 33159 40269 37186 35270 36647 35213 39513 37200 41872 39204 41521 38381 42216 39168 41929 39212 36040 37896 39522 40920 35232 38325 39032 42412 39972 37714 36129 38384 42958 44171 36437 33980 36726 40793 42243 40082 41396 38465 40904 39827 42704 40758 41366 39040 37700 37831 35541 39029 35611 37824 41536 42740 33476 35530 33911 36773 37184 34987 33564 40352 36042 36054 35101 36560 34651 39978 41945 39030 42723 37184 39049 35559 34160 38061 34169 33992 34786 41593 37513 37291 33837 39657 33988 35756 41269 39367 37721 42605 35621 36148 39896 43211 33179 42840 33536 36794 34236 39398 34828 39819 34935 39306 42736 37563 41998 35383 42150 37521 33549 36089 34673 38176 43139 38944 34539 40006 35174 39011 32695 36124 39237 36088 40803 35114 42811 38212 36796 40995 36397 38080 41176 34427 34001 39376 34368 37344 41028 33459 42679 39801 38976 42679 37891 32758 40289 39213 36012 34409 38090 39017 39694 36640 36396 38039 34167 40840 43235 41333 36096 36355 34116 39191 37484 37056 37418 35538 37814 41056 43392 40673 41539 39523 36117 41091 37633 39077 38442 33044 38260 35963 33110 33765 40517 35650 34173 35763 36357 41146 38601 38727 34179 33939 37728 42820 35931 38660 34757 34740 37621 41882 38792 36464 35140 35749 35907 41312 42240 42251 38452 43031 34835 38430 35392 34568 37974 40467 41769 33456 38464 32675 34753 37458 34893 34400 37275 36197 39471 33792 36401 40066 42070 41457 40525 41668 37497 35536 38568 34288 34916 36445 35564 34485 36432 36661 36793 34656 38504 36175 37140 34456 36993 36254 37184 35898 35057 36000 36503 35080 41608 35773 36773 28658 29344 36557 32359 34592 37270 38824 32505 38328 35130 34769 42217 38620 36536 37212 35970 41125 40272 35348 39552 34232 37690 33134 33477 34953 40922 17670 34165 40546 40692 37312 38734 37178 32083 40256 40800 37037 44417 34490 35357 38842 42849 37616 42339 36888 35087 41941 38552 35014 33109 39332 40539 36236 30811 34576 40934 40243 42267 35136 39191 36329 35337 41673 40358 42578 42951 42544 33568 38710 37928 34819 42784 35776 41344 38726 41286 38742 35221 33549 35968 32306 39872 43143 37683 40424 42892 41832 37937 36120 40516 36577 40336 36928 32920 41148 41483 37513 34397 34705 42568 39722 40032 36621 35840 34075 41751 38920 42033 33393 38042 36124 41540 33960 40490 37033 38694 36500 38380 35620 33592 37984 40925 39176 34767 35532 42706 39344 42903 34952 32480 37222 41225 37184 37047 34339 33288 32998 42645 42515 43674 40973 37721 38657 37655 33980 38000 36214 36832 39034 33158 40041 35899 33928 42061 40521 32992 35593 36661 37911 36377 38656 36460 38080 33984 42931 33696 34416 39700 35271 42617 34416 35628 36912 33238 34100 39632 34452 34212 35560 37297 34712 34389 41480 41188 35932 33235 33208 35584 37781 36929 41401 38331 33977 34400 41800 37272 36996 36056 33526 40000 35221 34133 42382 36720 36279 35953 40918 41792 34469 34476 35954 38224 42581 35633 42439 41974 42333 38855 37249 38187 39015 40775 35368 34731 33376 38149 42416 35572 41984 40679 42352 37581 38382 38740 39533 41028 34743 35848 41879 38360 35420 35443 33520 41235 35509 33063 33000 37028 36292 35494 42496 41926 42754 36024 37324 37568 33096 41520 34076 36407 37542 37467 41547 41681 42033 38884 39732 42505 36480 34445 39558 38803 40505 34592 36788 39968 34626 39836 35979 33616 42171 42021 35029 32960 32823 36352 38148 34262 38171 37972 33705 38901 38491 37488 42823 41104 37443 40648 39602 35472 35472 38864 33964 35600 42642 38336 35085 34039 35384 35610 37357 41735 41717 41742 37768 41685 42985 41995 36192 34361 38290 35632 35742 37280 34247 34112 41826 38394 37165 33096 39255 41763 39527 41136 41030 34307 34405 37445 35527 42885 40906 40199 37555 42887 37596 34841 33701 36631 38903 40384 42135 41143 40369 37456 35820 32789 39431 41147 38977 40472 39946 34613 35755 36923 34772 33249 34951 34839 37651 41105 42585 40533 38023 40989 39296 34345 37228 37268 33760 34620 33010 37031 37193 32966 38373 33492 38583 40340 42029 41237 36564 34023 39128 35817 33457 38484 38573 39469 39173 36100 33852 40064 36987 41665 41316 39880 33497 37260 36770 37229 41429 38984 35728 33852 40339 42306 39648 39765 35095 42000 36699 38311 39996 43032 40729 36752 41536 40996 36061 40960 36356 33517 35349 40040 36439 38197 35680 37498 33272 33243 33716 33282 33049 33304 32365 34266 42609 35188 40551 42784 41293 33783 41520 33254 41572 33536 41560 34928 32817 36225 42498 37194 41809 35496 40122 33455 40107 33562 40496 33316 40989 33447 41303 36800 33233 35170 41384 36968 33348 37584 33936 38775 35456 39334 35203 40728 35714 42354 34503 41525 42326 41686 33217 42604 42610 40250 42212 37459 42472 36598 40138 34695 40347 37904 40067 27672 34693 29943 35443 33107 32085 34697 34908 35941 32506 43383 41124 38148 41633 34039 18065 38155 36757 34397 34248 41155 38509 32845 37604 34459 40315 39491 36017 42570 42801 39282 33957 39941 37589 40682 37350 40026 37406 41328 41176 47595 43234 40602 40769 40759 40233 39759 34791 41713 38444 41460 36017 39781 36315 34740 31619 38405 40152 40076 37314 40000 32720 40950 34197 35656 34128 35018 33654 32410 42259 41048 41585 34825 34124 32768 42232 42901 36717 35765 39043 35772 40005 34856 40403 34248 39363 43056 38052 33472 35219 39680 36137 41732 35489 39269 34608 40215 37124 35152 39168 37079 38336 37351 38740 37233 39212 36544 38781 37045 37527 37452 37236 35232 37096 32919 34739 41001 34747 39886 33386 40053 34996 42352 39216 34453 41440 33656 42466 42720 41008 42996 38628 34412 36518 40982 36064 38884 36722 42567 39175 36009 38305 37832 38673 36613 38729 37047 37313 36878 36952 34881 39895 34834 35624 41120 42552 41776 33813 41528 35981 34456 39517 35648 41108 32802 41880 33944 41032 35176 35682 39008 38536 35789 39549 37100 41792 42875 37961 40136 40000 34436 36875 43223 34601 34936 
23025 23226 21992 22456 23895 22898 22106 23173 23107 22982 22176 22486 23440 22795 22764 22349 22868 22984 23049 22263 23102 22816 23147 22593 22808 22829 22990 22833 22773 22306 23288 22803 23002 22455 23316 22979 23127 22352 22760 22435 23393 22639 22979 22252 23025 23083 23153 22129 23083 22512 23210 22377 22839 22979 23221 22204 22958 22444 23376 22365 22784 22951 23240 22353 22800 22618 23384 22547 22713 22442 23157 22727 22863 22631 23384 22602 22592 22492 23003 22761 22674 22710 23422 22582 22951 22589 23168 22389 22939 22321 23312 22452 22733 22919 23205 22317 22898 22540 22922 22359 22732 22979 22857 22274 23168 22528 22800 22844 22920 22391 23462 22647 22610 23227 22734 22480 23737 22462 22369 23537 22277 22458 23090 22411 23081 22088 23520 22518 22872 22591 22120 23001 23624 22404 22241 23051 22695 22232 22408 23416 23508 22643 22087 22778 22633 22711 22237 23083 22817 22962 23260 23257 23018 22914 22416 24005 22327 23127 22435 23930 22317 23329 22296 23873 22457 23255 22487 23801 22483 23225 22551 23603 22625 23177 22490 23492 22728 23118 22951 23276 23093 22924 23335 49 5429 8343 9339 10935 10931 12215 12219 12209 12740 34951 27984 26585 25120 25239 24104 25031 23745 24343 23893 24064 23753 23744 23597 23985 23041 24213 23301 23527 23689 23461 23104 23954 23072 23567 23440 23320 22928 23831 22821 23328 23459 23442 22808 23820 23166 23175 23431 23522 22608 23565 23056 23279 22813 23326 23069 23125 22907 23734 22697 23303 23345 23477 22804 23461 23141 23144 22948 23261 23207 23089 22813 23739 23015 23056 23353 23302 22528 23271 23198 23065 22368 22976 23960 23409 22294 22855 22969 23956 22695 22587 23494 23469 23040 22480 23009 24135 22979 22437 23220 23345 23203 22530 22710 23764 23276 22636 23044 22812 23543 22972 22814 22961 23058 23159 23205 22541 23218 22997 23511 22746 23131 23095 23303 23144 23048 22530 23203 22776 23570 22842 22913 22603 23176 23207 23202 22445 23280 22775 23659 22887 23231 22436 23075 22855 23330 23075 23251 22436 22980 22720 23620 22858 23029 22416 23252 22862 23372 22944 23114 22378 23111 22630 23520 22882 23036 22551 23184 22904 23279 23015 23124 22333 23074 22739 23553 22862 23289 22689 22971 23145 23235 23043 23046 22484 23105 22735 23575 22956 23270 22736 22784 9784 12803 14351 14976 14947 15287 14797 15479 15582 17016 28084 25847 24039 24293 24794 24184 24330 23633 22949 22979 23148 24272 23664 23957 23261 22755 23303 23298 24130 23519 22953 22695 22778 23017 23241 23363 23449 22590 23077 22946 23536 23112 23373 22955 22803 22737 23207 23257 23240 23123 23010 22720 23291 22880 23604 23069 23144 22700 22955 22791 23264 23161 23406 22584 23043 22583 23369 22796 23664 22871 23438 22668 23056 22557 23343 23056 23344 23129 23310 22488 23080 22911 23400 22743 23697 22936 23494 22734 22941 22509 23160 22959 23271 22993 23248 22552 22959 22858 23495 22727 23588 22830 23122 22529 23033 22900 23234 23182 23335 22763 22912 22431 23215 22837 23432 22921 22983 22565 22914 22946 23059 23168 23299 22599 22877 22656 23463 22797 23620 22491 22777 23128 23107 23376 22612 22383 23867 23074 22359 23445 23365 22154 23389 23203 22247 23639 22875 22469 23861 22443 22844 23257 22479 23261 22339 23833 22241 23217 22652 23301 22797 22999 22888 23012 22520 23317 23209 22786 22658 23223 22856 23043 23066 22793 22516 23031 22599 22825 22540 22788 22504 23095 22696 22972 22666 23081 22665 23097 22689 23220 22768 48 15444 17073 16929 17677 17210 17833 17538 18488 18293 29407 24942 24374 23821 24175 23212 24142 23296 23499 23290 23399 23387 23547 22679 23726 22885 23720 22736 23464 22809 23518 22807 23367 22570 23726 22428 23340 22757 23498 23008 23253 22886 23040 23265 22924 22789 22968 23161 22852 22859 22865 23311 22805 22796 23001 23183 22918 22813 23040 23059 23171 22706 23176 22549 23636 22758 22728 23148 22561 22955 23777 22304 22874 23238 22449 23676 23120 22249 22864 23031 22313 23395 23652 22241 22849 23120 22597 22653 23847 22641 22408 22991 22871 22680 22881 23477 22577 22887 22724 23141 22700 22778 23051 23272 22674 22888 22704 23060 22835 22962 22503 23188 22996 23224 22607 22752 22736 22971 22728 23228 22593 22862 22535 23212 23114 23424 22824 23004 22373 22765 22544 22681 22457 23178 22733 23182 22458 22872 22407 23045 22709 23271 23014 23473 22999 23577 22606 23142 22497 22954 22301 22777 22253 22715 22393 22759 22510 23023 22388 22889 22432 22989 22567 23286 22664 22926 22571 23052 22624 22813 22438 22695 22475 22789 22425 22787 22503 22636 22325 22691 22304 22654 22310 22711 22434 22819 22628 22763 22458 23169 23401 23798 18888 20236 19963 20196 19886 19694 19344 19560 19443 42560 24000 23785 23586 23697 23612 23637 23426 23237 22867 23205 22770 22791 22768 22510 22963 22737 23208 23119 23399 23318 23381 22971 22896 22518 22864 22799 23195 23017 23201 22747 23059 22713 22727 22536 23254 23080 23406 22794 23029 22462 23219 22786 23015 22479 23171 22298 22885 22825 23539 22797 23049 22407 23165 22608 23040 22539 22887 22856 23436 22564 22888 22342 23228 22509 22966 22485 23460 22702 22806 22658 23079 22433 22713 22896 23451 22331 23040 22650 23063 22375 22880 22852 23182 22373 23165 22615 22637 22880 23285 22392 23070 22662 22730 22637 23339 22533 23051 22595 22750 22791 23296 22388 23064 23162 22447 23492 22832 22583 22969 22065 22739 23674 22181 23052 22647 22276 23795 22300 23072 22683 22208 23549 22879 22317 23109 22491 22771 23652 22190 23173 23118 22641 22970 22698 22758 22904 22288 23207 22642 22851 22631 22551 22991 22890 22694 22895 22228 23261 22757 22856 22717 22636 22822 22969 22617 22999 22235 23351 22321 23122 22479 22769 22982 22727 22637 23005 22364 23427 22358 23170 22272 23143 22870 22732 22594 23029 22720 23260 22441 23019 22131 17920 20557 21677 20928 21783 21353 21655 21318 21561 21784 23969 23079 23274 22791 23495 22588 23114 22337 23520 22358 23221 22567 23220 22663 22983 22621 22713 22999 22865 22721 22642 23022 22684 22743 22928 22920 22973 22734 22896 22546 23308 22361 23000 21896 23707 22105 23262 22279 23317 22954 22546 22720 22230 23677 22093 23023 22265 23575 22283 23081 22587 23237 23331 22342 22829 22134 23776 22055 22913 22586 22981 22709 22680 22924 22866 22869 22761 22823 22743 23221 22415 22933 22314 23335 22415 23034 22695 22999 22727 22889 22574 22768 22967 22645 22629 22752 22528 23253 22232 23134 22410 23004 22826 22724 22596 22935 22237 23413 22640 22788 22568 23188 22173 23288 22693 22723 22667 22923 22405 23016 22830 23318 22236 22956 22601 23016 22580 22680 22507 23239 22850 22976 22497 22799 22556 23104 22467 23179 22165 22788 22710 23328 22884 23126 22384 22640 22340 22776 22626 23014 22666 23045 22566 22904 22534 22775 22518 22741 22454 22883 22399 22612 22389 22760 22510 22799 22682 23078 22894 22727 21976 22845 23225 23700 23267 22924 22304 22200 21890 22119 22023 22392 22228 22518 22484 22594 22497 22619 22538 22593 22464 22548 22422 22425 22784 22552 22855 22528 22741 22587 22960 22747 22831 22529 22630 22404 23040 23009 22537 22673 22929 22483 22829 22921 22539 22500 22804 22470 23225 22278 22820 22578 22811 22347 23249 22688 22592 22504 23074 22488 22694 22585 23345 22709 22919 22090 22722 22776 22877 22554 23000 22516 23002 22336 22712 22151 22792 22315 22974 22620 23202 22699 23333 22837 23258 22891 23288 22767 23196 22882 23257 22781 23336 22613 23159 22486 22913 22233 22567 22275 22887 22472 22921 22471 22889 22468 22940 22326 22471 22475 23063 22872 23005 22474 22504 22421 22992 22698 22839 22240 22487 22081 22537 22918 23613 22748 22180 22244 23031 22754 22625 21952 22756 23468 23351 22071 22238 22821 23063 22474 22061 22332 23587 23068 21976 22717 22944 22512 22146 23372 23426 22540 22588 22812 22481 22592 22503 23191 22571 22559 22704 22732 22283 22929 22892 22608 22470 22840 22306 22651 22950 23056 22283 22924 22415 22515 22813 23032 22272 22923 22502 22760 22925 22754 22439 22862 22048 23180 22425 22874 22410 22653 22684 22912 22391 22933 22103 23191 22419 22957 22308 22571 22848 22738 22503 22995 22529 23109 22194 23080 22079 23173 22200 23003 22143 22933 22714 22651 22356 22755 22844 22755 22474 22755 22806 22711 22589 22777 22769 22759 22615 22786 22888 22656 22670 22585 22810 22829 22604 22762 52 5893 7947 9460 11022 11272 11309 12134 11853 12651 31812 28533 25328 25486 24103 25260 23991 23780 24069 23456 23969 22986 24338 23384 23612 24068 22854 10225 12797 15676 15445 15204 16805 15825 16019 16837 16001 29040 25375 25680 25031 24156 24821 23854 24072 24040 23680 23576 23670 23569 23808 23025 23932 23366 16405 17804 18012 18205 18836 18185 18721 18910 18809 36883 26044 24539 24764 23856 24331 23759 23712 23679 23832 23592 24085 23173 23620 23495 23434 23132 23707 18718 20124 20063 20544 20361 20685 20352 20949 20321 27392 24395 24096 23762 24080 23096 23944 23245 23628 23476 23655 22880 23917 23173 23180 23424 23481 17355 22151 21347 21911 21916 21938 21563 22459 21610 22103 24431 23470 23187 23776 22952 23324 23271 23071 22958 23631 22818 23426 23273 23179 22887 23601 22989 22673 23213 23252 22465 23092 23092 23075 22230 22999 23680 22477 22701 23992 22789 22592 23783 23231 22493 23848 23049 22288 23159 23258 22720 22384 22784 23701 22446 22388 23703 23156 22348 22944 23075 22725 22823 22705 23364 22753 22708 22952 23154 22446 22977 22740 23339 22576 22808 22997 23075 22671 22838 22615 23368 22795 22692 22580 22949 23088 22884 22396 23471 22785 22704 22669 23140 22720 22822 22556 23467 22664 22862 22680 23130 22496 22935 22565 23355 22406 22962 22980 23126 22284 23060 22620 23008 22337 23173 22630 22821 22503 23361 22374 23127 22992 23202 22453 23216 22641 22784 22520 23110 22643 22834 22749 23441 22528 22807 22682 23161 22513 22738 22529 23349 22616 22658 22732 23021 22347 22964 22701 22780 22597 23024 22407 22913 22668 22724 22695 23060 22188 23157 22784 22291 23488 22532 22528 23657 22161 23077 23565 22292 22596 23516 21952 22642 22319 22701 22957 22299 22900 23212 22018 23389 22799 22348 23632 22803 22449 23725 22372 22732 23416 22373 22931 22701 22897 22816 22608 22983 22718 22615 22715 22793 22930 22332 23015 22484 22986 22255 23353 22358 22828 22376 23200 22761 22960 22809 22775 22551 22580 22848 22784 22449 22974 22487 22981 22304 23303 22306 22952 22441 23004 22560 22705 22739 23037 22257 23386 22336 23223 22821 22637 22428 23105 22258 22934 22144 23219 22665 22711 22730 23083 22404 23289 22356 22916 22659 22717 22605 22613 22814 22844 22391 23040 22448 23153 22217 23285 22293 22885 22762 22769 22643 22537 22915 22657 22485 22912 22550 22936 22552 23143 22341 22953 22150 23207 22631 22745 22794 22628 22583 22854 22285 22809 22816 22544 22593 23626 22626 22280 23018 23080 22863 22215 22259 23069 22814 23465 22698 22284 21838 22359 22984 22677 23565 23197 22637 22088 22004 22326 22628 23268 22628 23655 22965 23426 23012 22760 22762 22355 22602 22197 22656 22417 22682 22368 22732 22519 22758 22457 22791 22529 23089 22429 23080 22464 23106 22458 22993 22416 23040 22496 23201 22425 23212 22485 23224 22400 23219 22473 23128 22447 23098 22385 23065 21768 22933 22215 22823 22300 22763 22515 22816 22279 22695 22130 22641 22025 22765 22117 22721 22176 22800 22286 22935 22532 23159 22503 23065 22641 23024 22840 23057 22777 22897 22664 22735 22506 22872 22336 22880 3743 7705 9001 11024 11185 12116 12025 12887 12119 43639 29580 27308 25431 25580 24409 11218 14072 15336 15244 15964 15942 16619 16599 17060 16992 29726 26468 25912 25202 25081 11624 18107 19171 18958 19665 19277 19638 19431 19029 19050 27651 25144 24259 24008 23760 23479 19497 20510 20845 21298 21310 21953 21230 22007 20983 28587 25336 25117 24000 24127 23527 20806 21791 21929 22305 22168 22630 22198 22787 22167 22629 23946 23959 23460 23801 23269 23540 22956 23224 22838 23338 23047 23463 23263 23560 23480 23581 23494 23456 23433 23422 23354 23300 23180 23256 22805 23135 22601 22960 22681 23134 22734 23143 22673 23129 22699 23253 22726 23303 22875 23458 22923 23541 22801 23651 22787 23565 22780 23330 22763 23296 22522 23020 22382 22949 22583 23122 22736 23240 23044 23123 23029 23191 22989 23165 22638 23175 22564 22977 22410 22837 22566 23021 22679 23033 22662 23278 22817 23357 22796 23440 22821 23420 22652 23129 22658 23056 23029 22941 22553 22788 22400 22838 22547 23052 23020 23168 23396 23159 23590 22808 23107 22555 22830 22745 22390 22361 22027 22259 22437 22800 22889 23376 23104 23840 
23385 21959 22898 22204 23254 21975 22709 22710 23204 22022 22978 22202 23315 22149 22528 22291 22912 22182 22736 21984 23404 22272 23000 21820 23111 22570 23040 22131 22648 22231 23456 22343 22628 22212 22903 22695 22917 21818 23036 22124 23324 22335 22489 22073 22869 22508 22549 22055 23545 22570 22087 21911 22763 23364 22469 21601 23586 22759 22457 21545 22488 23344 22533 21415 22914 22390 23431 21724 22224 23177 23121 21703 22305 22615 23218 21556 22205 23202 22489 22292 22022 22621 22649 22354 22393 23015 22435 22227 22386 22552 22752 22291 22247 23072 22480 22463 22784 22928 21993 22693 22519 22828 21960 22641 22604 22516 22321 23136 21904 23209 22548 22375 22079 23105 21974 22743 22369 22595 22200 23033 21804 23015 21884 23124 22087 22722 22291 23203 21890 22855 22019 22379 22553 23303 21960 22793 22267 22902 21706 22712 22424 23396 22157 22577 22234 22729 21979 22689 22339 23255 21737 22934 22103 22810 21816 22769 22632 22994 22033 23058 22278 22675 21991 23276 22503 22487 22205 22706 21996 22652 22629 22528 22144 22992 21964 22551 22507 23341 22055 22471 22592 22832 21859 21925 22862 23817 79 81 119 3759 4907 6863 8140 43662 43690 41653 35323 32098 29300 28759 26723 26945 25108 26307 25025 24645 25600 24064 24375 25276 23182 23761 24164 23479 23728 23552 23008 23948 22880 23392 23523 23287 22733 23453 23370 22528 23022 24080 22753 23000 23630 22744 23367 23303 23236 22589 23285 23236 22737 22962 23095 22979 22885 22969 23649 22791 23378 23411 23445 22703 23633 23086 23143 22698 23433 23040 23097 22829 23633 22504 23168 22985 23460 22220 23133 22645 23653 22493 23054 22673 23416 22634 22920 22597 23717 22715 22983 22437 23321 22741 23150 22377 23704 22688 23021 22272 23188 22889 23084 22302 23392 22535 23517 22138 23056 22839 23420 22428 22926 22341 23663 22605 23174 22286 23079 22982 23282 22499 22841 22313 23550 22649 23328 22380 22757 22746 23120 22487 22912 22338 23565 22710 23497 22336 22209 22089 22666 23746 23397 22700 22152 21850 22945 22787 23364 21979 22092 22448 22776 23657 23355 22328 22068 22305 23473 23070 23186 22553 22309 22741 22471 23399 22679 22880 22292 22748 22819 22936 23133 22907 22362 22548 22416 23376 22660 22713 22201 22801 22768 22885 22793 23027 22192 22720 22331 103 86 745 5144 8037 9274 11612 12197 13688 43626 43696 38103 33352 29618 29074 26839 26591 24956 25296 24412 24684 24276 24728 23655 24138 23363 24335 23281 24281 23047 23474 22787 23791 23416 23635 23120 23556 22480 23688 22656 23819 22730 23170 22151 23275 22795 23105 23046 23360 22599 22995 22829 23633 22935 23676 22851 23064 22496 23428 22950 23315 23078 23216 22105 23168 23080 24004 22957 23727 22729 22560 21821 22520 22762 22953 23818 23504 22824 22515 22064 23296 22522 24128 22966 23579 22545 22345 21869 22497 22641 22819 23831 23342 22465 22680 22535 22647 22900 22946 23059 22746 22676 22305 22668 22643 23247 22797 23289 22588 22585 22266 22848 22839 22980 22705 22713 22181 22813 22957 23404 22431 23191 22363 22573 22245 22791 22854 23144 22573 22829 21695 23505 22657 22957 22056 23055 22657 23040 22209 23507 22274 22800 22734 22986 22125 23501 21985 23121 22445 22935 22373 22916 22480 23088 21624 23200 22304 23157 22283 22857 22726 22892 22181 23243 22126 22804 22609 23360 22043 22865 22346 23164 22371 22993 22282 22850 22273 22769 22272 22813 22345 22971 22387 23074 22576 23137 22847 23189 22372 23107 22242 123 152 6825 9923 12664 14058 15753 16496 17641 17067 43690 36360 31534 28609 26398 26896 25496 24591 25175 23271 25067 23824 23639 23936 22967 24377 22630 23537 22551 23763 22748 23362 22823 23801 22761 23162 22926 23141 23205 22763 23009 22759 23184 22878 22636 23200 23097 22916 22528 23040 22968 22700 22528 22912 22952 23015 22955 23271 22508 23332 22328 23131 22294 23401 22452 22892 22535 22967 22423 23461 21941 23014 22446 22846 22573 23109 22134 22998 22586 22714 22665 23460 21943 23125 22426 22995 22024 23496 22040 22898 22301 23161 22095 23296 22736 22928 22062 23049 22201 22948 22253 23397 22528 22892 22170 23017 22409 23001 22043 23005 22713 23328 22237 22508 22294 22909 22411 23097 22082 22648 22177 23221 22724 23341 22455 22498 21802 22557 22374 22825 22477 23207 22754 22197 21504 22193 22377 23243 23456 23968 23378 23355 22619 22786 22108 21845 21633 22218 21943 22169 22188 22386 22594 22320 22581 22432 22656 22321 22779 22415 22604 22449 22595 22640 22708 22556 22679 22407 22784 22426 22754 22327 22832 22260 22830 22417 22810 22387 22784 22151 22874 21513 22923 22253 22609 21932 22540 21921 22657 21900 22604 22072 5991 12252 16009 16569 18337 18176 19104 19019 19664 43671 33002 27850 26628 24849 24927 23841 24460 23416 24111 23137 23704 22853 23461 22633 23416 22448 23111 22138 23105 22541 23688 22869 23495 22737 23152 22218 23006 22063 23012 22456 23168 22443 23366 22319 22592 22330 23246 22856 23256 22306 22755 22293 23053 22535 23007 22295 22532 21562 22616 23152 23895 22272 22042 22195 23201 22451 22326 21755 22996 23525 23514 21952 22305 22834 22568 21580 22567 23484 23079 21600 22734 22713 22561 22285 22573 23048 22545 22473 22603 22637 22344 22439 22889 22619 22381 22843 22311 22487 22648 22936 22112 22839 22337 22343 22535 23173 21910 22915 22347 22404 22676 22784 22233 22896 22096 23009 22644 22610 22259 22868 21806 23229 22151 22839 22197 22663 22486 23109 21913 23121 22146 22912 22665 22681 22121 22946 21819 23271 22277 22817 22283 22682 22364 23046 21988 23163 22138 22910 22536 22585 22292 22899 22224 23192 22006 22977 22245 22701 22605 22580 22369 22787 21975 23306 21996 23090 22359 22960 22384 22713 22371 22765 22311 23337 21784 23085 21593 23342 22620 22471 22285 21917 23077 22995 22105 22534 21445 23799 21738 23162 21960 10565 17175 18258 19361 19311 21291 19936 21020 21120 20974 29571 25910 24449 23776 24000 23111 23361 23080 23276 23015 22700 22923 22409 23366 22323 23015 22251 23157 22467 23046 22643 22893 22593 22956 22304 22618 22752 22645 22372 22487 22745 22704 22445 22996 22453 23076 22096 22935 21900 23333 21952 23072 22145 23079 22189 22945 22286 23162 22395 23051 22052 22737 22552 22683 22405 22960 22440 23002 22236 22781 22103 23157 22181 23012 21776 23362 21849 23117 21745 23328 22051 22937 22123 22856 22550 22665 22287 22516 22644 22543 22336 22725 22439 22819 22377 22813 21847 23321 22057 22746 22217 22279 22944 22793 21762 23004 21770 22733 23467 22569 22055 22966 22117 22199 23296 22930 21551 23054 22173 21815 21677 23445 23232 22089 21831 23023 22420 22184 21618 21968 22760 22860 22900 22289 22394 22245 22769 22544 22533 22137 22161 22347 22855 22838 23094 22484 22755 22199 22323 22077 22563 22265 22865 22405 22796 22426 22912 22216 22775 22211 22787 22163 22727 22278 22814 22240 22948 22129 22483 21847 23106 22472 23216 22112 22426 21719 22663 21959 22744 22025 22771 22033 22840 22262 23011 22135 23044 22188 22995 22183 22989 22233 22935 22301 22989 22303 22972 22249 23132 21921 22706 21927 22605 21804 22987 22581 23161 21680 22943 22269 22756 22127 23183 21856 22691 22481 22718 22609 22541 22083 22968 21907 22777 22601 22704 21834 22734 22220 22256 21972 23564 23120 22729 21421 22023 21600 22572 22543 22871 22092 21956 21383 22055 22192 23019 23107 23664 23399 23664 23014 23226 22553 22704 22397 22405 22136 22379 22231 22453 22681 22469 22824 22456 22856 22726 22864 22821 22833 22533 22442 22109 22152 22221 22712 22368 22680 22401 22573 22282 22237 21964 22762 22575 23027 22381 22440 21829 22720 22292 22677 22228 22985 21853 22478 22394 23208 22214 22528 21889 23003 22092 22805 21735 22709 22531 23076 21984 22418 22119 22991 21947 22436 21966 23442 22155 22570 22109 22944 21983 22741 22358 23056 21906 22853 22116 22914 21692 23033 22373 22764 21841 22945 22017 22397 22488 23175 21811 22933 22114 22504 22080 23188 22125 22592 22370 22372 21937 23209 21881 22744 22190 22443 22357 23233 21863 22828 22128 22151 23156 22016 22629 22469 21939 23733 21460 22930 22058 22259 23213 21780 22605 22148 22592 22934 21713 22449 21397 23733 22139 22708 21543 22476 23266 21813 22372 21802 22919 22014 22615 22071 22923 22365 22528 22330 22407 22764 22408 22288 22403 22639 22507 22296 22433 22555 22510 22189 22470 22661 22443 22087 119 87 85 195 86 2742 5913 6609 9059 9232 43672 43712 39952 34080 31104 29074 27876 26423 26199 25413 25672 24371 25293 23878 24620 23751 24533 119 29 4739 8994 10757 13575 13254 15293 14935 43630 43692 40171 34016 30635 28220 28109 25712 26304 24943 25464 24581 24651 24384 24548 23819 24571 23250 103 8457 12729 14345 15768 16154 17750 17300 18625 43668 40071 32618 29776 26957 27273 25445 25602 25067 24520 24100 24440 23492 24551 23288 24119 23991 135 10012 15344 16040 18990 18877 18711 20379 20349 19222 42097 31354 27701 27426 25207 24402 25823 23504 24112 24639 23207 23578 23889 23392 23244 24018 22929 11075 17341 18908 20077 20464 20576 21117 21120 21181 21202 30080 25968 25267 24344 23961 23515 23601 23198 23620 23277 23217 22903 23715 22589 23410 23194 23159 22851 23776 22817 23048 23004 23529 22237 23241 22560 23278 22154 23239 22887 22885 22483 23519 22460 23108 22864 22958 22231 23624 22482 22797 22343 23360 22437 22801 22427 23555 22257 23082 22823 23224 22041 23163 22186 23349 21998 22954 22712 23244 22150 23372 22525 22979 22094 22988 22731 23128 21945 22957 22305 23352 22128 22839 22719 23138 22240 22844 22313 23249 22211 22960 22810 23128 21847 22810 22464 23229 21731 22274 23408 23085 21606 23484 22798 22371 21699 22731 23267 22256 21830 23793 22622 21872 22824 23297 21496 22672 22713 22755 21719 22624 23082 21884 22617 22886 22854 22063 22908 22569 22488 22237 22656 22773 22385 22432 23098 22621 22162 22428 22776 22497 22533 22216 23170 22296 22605 22739 22839 21986 23078 22435 22463 22747 22809 22068 23114 22305 22771 22705 22773 22119 23115 21888 22880 22358 22642 22099 22922 21962 22912 22176 22711 22232 22476 22615 22948 21896 23275 22144 22708 22617 22703 22039 23275 21958 22837 22510 22509 22008 22937 22256 23121 21780 23208 21907 23217 22384 22934 22159 22514 22565 22690 22128 22697 22263 23028 22595 22989 22141 22909 21913 23241 21992 22793 22044 23109 22289 22564 22615 22735 22240 22454 22738 22573 22115 22804 21953 22999 21354 23605 22215 22496 23291 21936 22057 23136 21477 22818 22117 22501 22702 22039 22586 22913 21912 23722 21888 22582 23317 21850 22176 22982 21704 22938 21565 23125 22331 22399 22872 22016 22754 21929 22907 22328 22596 22718 22313 22397 22362 22756 22512 22257 23140 22361 22684 21892 23083 22168 22694 22174 22791 22489 22712 22725 22494 22292 22427 22363 22923 21860 22909 22361 22699 21972 22714 22453 22641 22138 23250 22289 22679 21863 22936 22417 22978 22307 22722 21756 22602 22034 23209 22204 23163 22272 22579 21692 22579 22140 22870 22471 22858 22484 23097 22294 22789 21792 22438 21797 22629 22028 22663 21996 23052 21961 23056 22053 23063 22062 23011 22047 23211 22279 23142 22060 23236 22090 23139 22087 23309 22141 23233 22397 23186 22317 23133 22294 23135 22240 23265 22177 23310 22192 23512 22217 23337 22305 23032 22404 23296 22012 23074 22147 22656 22008 22279 21829 21837 21600 21988 21378 21948 21421 21971 21847 22460 21632 22348 22233 22709 22728 22968 23155 22749 23080 22293 22919 22222 22766 22212 97 221 79 68 3075 5531 7581 8933 9506 43654 43683 43712 37065 32733 30169 131 1111 8383 11602 13387 15130 15499 16664 16654 43619 43698 42144 34703 31783 29204 147 8490 14535 15944 18295 17988 19687 18855 20209 19235 43690 35712 31698 28519 27740 457 12920 16336 19012 19362 20675 20455 21286 20951 21469 42925 33137 29035 27655 26292 26384 16065 19849 20376 21588 21109 22258 21490 22839 21632 36517 27952 27161 24962 25682 24148 24740 23713 24225 23285 23804 23021 23745 22989 23958 23346 23795 23553 23768 23413 23785 23318 23671 23351 23444 23063 23049 22755 23071 22272 22409 22106 22388 22007 22311 21753 22410 21991 22379 22313 22866 22625 23482 23052 24104 23040 24111 22618 23859 22483 23665 21958 22738 22176 22064 21820 22277 22097 22475 22912 22742 23302 22662 23367 22565 23155 22453 22871 22423 22587 22202 22504 22290 22623 22280 22560 22378 22807 22473 23008 22842 22992 22840 22954 22903 22768 22593 22845 22560 22711 22065 22477 22026 22635 22401 22979 22439 23153 22470 23346 22341 23367 22195 23317 22144 23000 22060 22723 21983 22724 21929 22848 22253 23105 22738 
