# Supplementary material for: An Active Feature Selection Strategy for DWT in Artificial Taste
Source: Hindawi journal article supplement (doi:10.1155/2018/9709505), 2018-01-01
Supplement: f1 [file 9709505.f1.zip › maofengTea-hi-3.txt]

43512 43484 43472 43482 55 46 17625 19532 21419 21740 22236 21598 22851 22091 22458 21873 22775 22336 22724 22073 23407 22356 22751 22609 23089 22137 22872 22528 22960 22290 22916 22725 22768 22273 23377 22535 22656 22537 23021 22672 22765 22400 23443 22771 22244 22752 23149 22483 22108 22736 23747 22692 22138 22847 23045 22690 22216 22295 23852 23025 22298 22076 22777 23328 22444 22100 23442 22949 22679 22071 22428 23479 22757 22903 22400 22936 23019 23042 22568 22640 22580 23111 22827 23006 22625 22768 22686 22912 22864 22993 22219 22917 22401 23348 22601 23227 22373 22645 22294 22925 22890 23174 22560 22838 22363 23099 22438 23456 22568 23260 22520 22807 22183 23056 22406 23041 22854 23213 22708 23100 22368 22845 22124 22976 22562 23469 22418 23524 22565 23266 22444 22882 22301 23036 22574 23462 22768 23001 22836 23209 22856 23236 22602 23104 22541 23193 22323 22963 22252 22793 22350 22769 22418 22928 22471 23026 22135 23105 22472 23270 22521 23209 22515 23333 22509 23267 22543 23392 22631 23552 22754 23623 22730 23768 22776 23748 22537 23564 22510 23195 22497 22905 22355 23151 0 14935 17101 18304 18892 19777 20331 20645 21159 20547 31984 25006 24617 23499 23831 22888 23386 22967 23068 22575 22939 22691 23127 23197 23169 23200 23089 23157 22999 23031 23060 22708 22888 22311 22720 22584 23142 22808 23405 22606 23373 22508 23107 22312 22871 22245 23019 22620 23260 22953 23223 22840 23077 22375 22884 22236 23062 22501 23410 22529 23525 22430 23374 22480 22950 22293 22912 22478 23281 22753 23152 22732 23474 22351 22848 22400 23308 22555 23332 22739 22800 22110 22968 22464 23315 22880 23095 22281 22770 22301 23213 22621 23494 22501 23034 22359 22729 22605 23125 23040 22976 22477 22722 22442 22988 22708 23367 22595 23235 22388 22756 22150 23034 23178 22901 22743 22321 22438 23520 22961 23797 22195 22285 21986 22732 23488 22874 22958 22129 22160 23174 22946 23670 22396 22048 22275 22576 23136 23040 23516 22375 22734 22324 23097 22873 23054 22758 22770 22420 22777 22806 23313 22713 22855 22310 22877 22747 23142 22909 23003 22556 22834 22388 22583 22378 22912 22512 22976 22421 23052 22497 23110 22528 22947 22360 22832 22304 22767 22135 22817 22230 23023 22408 22451 22682 23100 22858 23144 22547 22920 22189 23105 18082 21149 20612 21843 20969 21588 20967 21688 21734 36832 24308 23901 23125 23885 22592 23322 22929 23556 22272 23633 22633 23180 22937 23301 22429 23314 22407 22810 22866 23440 22421 23040 22680 23048 22695 22818 22261 23085 23032 23504 22560 22744 22487 23050 22733 23040 22628 22881 22850 23221 22954 22989 21997 22790 23684 22669 22544 23204 22080 23788 21946 23223 22951 22296 23027 23000 22000 23014 23528 22680 21997 22437 22939 23240 22970 22891 22852 22368 22632 22587 23202 22727 22985 22272 22937 23084 22912 22390 23027 22688 23040 22424 23000 22272 23329 22237 23112 22343 23335 22684 22763 22497 23171 22276 23103 22894 23376 22442 22730 22197 22986 22358 23045 22355 23104 22183 22840 22168 22796 22211 22941 22796 23385 22832 23033 22227 23249 22472 23122 22066 23159 22822 23095 22272 23079 22870 22596 22808 23127 22349 23193 22073 23354 22476 23174 22418 22976 22773 22840 22528 22699 22931 22769 22549 22709 22986 22871 22471 23176 22290 22953 22324 23063 22640 22597 22896 23217 22092 23257 22695 22261 23022 23108 22085 22485 22640 23477 21841 22704 23517 23136 21869 22793 22620 23525 22448 22068 22768 22832 23352 22201 17494 21761 21543 22357 21610 21220 21863 21996 22407 21884 25024 23367 23177 22601 22903 23095 23067 23232 23222 22986 23088 22569 23036 22384 22784 22316 22928 22352 23085 22915 23265 22521 23481 22561 23456 22679 23249 22624 23159 22568 23200 22555 23342 22521 23287 22485 23322 22565 23492 22469 23496 22564 23478 22491 23432 22423 23373 22424 23160 22313 22964 22294 22947 22062 22969 22304 23227 22624 23249 22762 23057 22618 22984 22127 22863 22336 23352 22439 23384 22516 23460 22404 22855 22158 23012 22840 23086 22868 22949 22404 22649 22429 23240 22594 23276 22362 22713 22434 23116 22913 22944 22471 22464 22386 23141 22770 23712 22607 22679 21794 22628 23317 22965 22724 22144 22158 23275 22760 23101 21962 22584 23470 22726 22948 22449 22220 23629 22545 22672 21967 22919 23624 22396 22327 22604 23064 22889 22779 22367 23153 22716 23181 22482 22938 23086 22890 22416 22871 22752 23309 22389 22871 22768 23008 22327 22885 22672 23393 22288 22957 22833 23040 22209 23020 22537 23165 22125 23216 22888 22856 22237 23200 22432 23093 22008 23224 22790 23040 22339 23496 22224 22757 22740 22976 22256 23224 22455 23216 22061 23245 22765 22752 21212 22656 21437 22656 22353 22240 21995 22989 21752 26048 23392 23344 22646 23609 22411 23346 22872 22830 22624 23211 22184 23197 22555 22760 22749 23082 22441 23066 22478 22976 22487 22838 22817 22991 22409 23394 22482 23033 23004 22459 22656 23304 22084 23104 22343 23021 22487 22231 23539 22612 22604 23656 22149 22987 23015 22229 22881 22618 22864 22770 21978 23620 22440 22758 23599 22481 22528 23731 21967 23088 22984 22594 22882 22298 23268 22138 22922 22985 22628 22759 22760 22439 22870 22503 23280 22656 22871 22916 22561 22611 22806 22722 23128 22555 23190 22272 23089 22343 23011 22454 22936 22913 22673 22531 22819 22698 22432 22387 23348 22108 23232 22265 23347 22332 23132 22516 22914 22354 22818 22707 22408 22432 23463 22137 22962 22791 23065 22402 23500 22124 23136 22720 23024 22168 23073 22511 23059 22197 23104 22748 22881 22208 23447 22384 23063 22204 23204 22773 22947 22236 22923 22562 23264 22278 23020 22912 22496 22263 23136 22630 23074 22206 23051 22950 22973 22809 22989 22240 22716 22487 23086 22658 23406 22642 23401 22503 23036 22180 22694 22282 22912 22700 23796 22971 23139 21993 22342 22945 22995 22697 22180 21527 22624 22314 22811 21767 23539 21637 22863 21868 23357 22696 23172 22807 22709 23450 22349 23160 22560 22568 22600 23345 22599 22804 22820 22820 22451 22656 22786 23386 22706 22676 22570 23147 22460 22786 22409 23456 22912 22898 22336 23221 22481 22792 22337 23164 22848 22954 22289 23264 22392 22856 22412 23442 22352 22976 22459 23042 22004 23392 22433 22950 22424 22753 22656 23241 22320 23052 22020 23701 22240 23234 22263 23307 22528 23151 22508 23153 22333 23119 22187 23389 22288 23066 22377 22995 22474 22757 22744 23141 22371 23338 22256 22917 22731 22702 22405 23276 22223 22899 22871 22797 22505 23368 22535 22793 22848 23084 22236 22982 22609 22924 22303 23378 23275 22867 22119 23185 22634 23415 22458 22039 22122 22648 23584 23063 23241 22887 21933 22114 22261 22907 22503 23784 22949 23590 22842 22830 22287 22341 21912 22149 22276 22462 22707 22344 22963 22356 22901 22364 22892 22519 22753 22436 22764 22625 22749 22380 22848 22442 22726 22287 22737 22080 22836 22424 22971 22744 23152 22841 23098 22928 23050 22767 23045 22780 22873 22319 22807 22265 22733 22368 23147 22517 23424 22421 23561 22289 23305 22612 22930 22082 22882 22452 23129 22888 22988 22418 22799 22118 23109 22562 23414 22498 23312 22375 22836 22325 23064 22896 23026 22148 22807 22475 23496 22343 22990 22083 23092 22816 23008 22532 22660 22407 23333 22405 22914 22257 23026 22945 22939 22323 22669 22592 23367 22533 22789 22776 22858 22382 22573 22707 23320 22205 22473 23029 22852 22345 22122 22724 23714 22375 22167 23146 22790 22104 22626 22919 23012 21844 22930 23501 23033 21888 23057 22875 22838 22047 23016 23687 22304 22440 23193 23181 22416 23302 22490 22868 22604 22968 22584 22725 22784 22865 22378 22999 22702 22661 22712 23096 22212 23100 22823 22560 22550 23300 22564 22870 22934 22890 22311 23379 22476 22923 22822 22996 22451 23405 22183 23104 22813 23084 22352 23496 22215 23045 22722 22949 22453 23356 22144 23209 22562 22689 22576 22977 22264 23157 22393 23049 22392 22864 22720 23328 22320 23298 22240 23205 22737 22676 22670 23016 22514 23020 22057 23490 22261 22997 22846 22659 22542 22893 22658 22987 22461 23399 22144 23034 22368 23188 22629 22768 22904 22625 22622 22858 22589 22919 22538 23265 22297 22949 22300 23280 22236 22888 22948 22584 22581 22247 23448 21990 22825 22230 23438 22360 22596 23410 22400 22778 22005 23766 21832 22994 22004 23713 22006 23095 22555 23088 22916 22745 23191 22506 22615 22284 23493 22238 22917 22304 23500 11063 18406 19008 20919 19923 20793 20336 21257 20396 43456 26039 24527 23297 23627 22988 23657 22836 23192 23093 23040 22676 22954 22973 22916 22626 23076 22968 19645 20816 21691 21365 21984 21160 22192 21617 22279 36663 24972 23159 23929 22912 23532 22920 23349 22594 23285 22770 23205 22800 23313 22602 23418 22439 51 20673 22286 21315 22551 21690 22567 21453 22589 21837 27068 23595 23645 22912 23307 22056 23386 22800 23050 22484 23291 22876 23142 22586 23123 22880 22903 17797 21905 22278 22032 22058 22350 22485 22376 22193 22601 24119 23304 22938 23168 22992 23212 22840 23169 22760 23014 22696 23418 22446 22953 22350 23638 22330 21888 22552 22103 22512 21934 23232 22375 22352 23465 21659 23680 23160 22376 23138 23568 22061 23225 23008 22334 23084 23092 22086 23182 22930 22186 23058 22925 22119 23186 22864 22406 23079 22864 22596 22697 23389 22489 22632 22642 23032 23000 22991 22787 22970 22552 22605 22502 22656 22483 22868 22357 22764 22328 22722 22413 22695 22339 23127 22720 23014 22858 23200 22670 23040 22256 22874 22147 22714 22216 22916 22132 22833 22148 22876 22138 23096 22283 23159 22615 23204 22757 23246 22244 22952 22585 23387 22344 22834 22599 23119 22226 23233 22437 23245 22208 23123 22183 23174 22337 22862 22886 22784 22697 23005 22670 22999 22298 23460 22155 23100 22200 23436 22251 23200 22232 23387 22273 23170 22244 23424 22191 22941 22254 23394 22171 23044 22274 23408 22265 22868 22561 23004 22689 22830 22574 22726 22999 22650 22544 22996 22528 23529 21895 22886 22512 22511 23493 22196 22409 23207 22049 23627 21832 22690 22766 22382 23569 22464 22279 23104 22073 23241 23383 22144 22856 22519 22496 23753 21975 22690 22931 22093 23654 22549 22758 22655 22941 22518 23414 22313 22896 22769 22661 22864 23081 22364 22848 22743 22686 23092 23000 22176 22939 22464 23078 22880 22732 22413 23086 22519 22899 22969 23001 22494 23152 22274 23079 22912 23029 22432 23056 22547 22776 22864 22984 22082 22959 22426 22798 22714 23360 22026 23111 22464 23075 22311 23452 22546 22717 22353 23132 22204 23281 22896 22716 22390 23213 22192 23095 22818 23079 22216 23194 22308 22829 22851 23141 22215 22992 22628 22718 22505 23488 22513 22685 22318 23249 22124 22905 22674 23278 22152 22941 22426 23008 22161 23124 22835 23050 22173 22762 22673 22955 22352 23151 22962 22987 22272 22903 22607 22984 22327 23116 22940 22660 22576 22860 22599 22668 22600 23328 22633 22309 22470 22956 22713 22443 22244 23532 23557 22330 22141 22729 22925 22828 21961 22556 23297 23658 22541 22104 22100 22333 22744 23129 22610 22272 22772 23792 23401 22884 21969 22136 22272 22684 22966 23069 22384 22213 22791 22843 23312 22981 23176 22517 22602 22337 22661 22585 22821 22727 22960 22504 22532 22368 22868 22709 23269 22938 23301 22743 22959 22313 22656 22141 22913 22444 22845 22524 23144 22453 22834 22284 22841 22400 23252 22789 23373 22785 23238 22490 22776 22136 22697 22348 22952 22372 23174 22437 23204 22460 23100 22272 22925 22183 22809 22192 22909 22414 23141 22612 23239 22862 23385 22811 23207 22492 23065 60 17436 18831 20737 20275 21042 20306 21128 20544 21248 32185 25155 23128 23751 22933 23384 19433 21460 21197 22029 21521 22236 21580 22365 21764 39338 24293 23969 23168 23556 22886 19790 21213 22055 21648 22165 21858 22342 21961 22587 22304 24942 23700 23944 23277 23713 17111 22560 22410 22963 22542 22931 22128 22503 22071 22309 23749 23106 22432 22572 22224 22482 21436 21895 21832 22099 21962 22344 22146 22595 22473 24459 22924 23163 23074 23253 23109 23288 23111 23344 23195 23084 22798 22840 22679 22450 22216 22401 22232 22306 22084 22165 22045 22186 22095 22212 22189 22213 22984 22786 23196 22902 23370 22969 23418 22997 23163 22871 23049 22664 22521 22364 22588 22525 22857 21952 22920 22555 22963 22612 23152 22736 23057 22536 22766 22338 22785 22848 23240 22921 23158 22386 22720 22208 22884 22453 22983 22513 23216 22450 22863 22400 23139 22856 23333 22549 22731 22144 23031 22528 23124 22247 23097 22797 23392 22216 23116 22507 23054 22359 23300 22403 23166 22204 23337 22320 23105 22727 22747 22515 23437 22326 22926 22484 23286 22409 22910 22304 23480 22336 22939 22101 23118 22882 22981 
22474 21912 22114 21561 22448 22096 21960 22343 21931 21919 22208 21771 22464 21778 22240 21690 22230 22044 22173 21794 21797 21913 22486 21899 22016 21685 22400 21703 22152 21930 22202 21149 21963 21641 22283 21664 22189 22650 21719 21952 21509 22196 21898 22113 21570 22608 21713 22020 21668 22304 21715 22122 21494 22720 21793 21982 21544 22208 21904 22146 21237 22453 21652 22272 21387 22262 21980 22403 21256 22368 21723 22647 21756 21942 21872 22439 21740 22327 21327 22493 21635 22789 21723 22088 21497 22137 22109 22450 21586 22048 21674 22439 21802 22567 21845 22128 21510 22324 22026 22472 21909 22141 21479 22079 21828 22689 21945 22555 21774 21401 21303 21666 21991 22017 22668 22377 22383 22038 21495 21477 21359 21921 22040 22757 21952 22988 22153 22272 21833 21413 21268 21500 21646 21965 22947 21936 22596 21993 22604 21952 22266 21859 21900 21793 21875 21738 21816 21672 21947 21735 22204 21922 22215 22082 22232 22126 22221 22328 22336 22216 22323 22215 22413 22232 22429 22170 22484 21975 22484 22054 22503 22042 22516 22034 22485 21989 22497 22072 22429 21966 22379 21981 22365 22158 55 53 4234 7829 11029 11379 12925 12918 14377 13830 43379 28872 25868 23688 24071 22647 23429 22309 22933 22114 22602 21611 22644 21752 22514 21973 22637 22191 22536 22325 22338 22077 21753 21737 21939 21612 21997 21769 22339 21949 22592 21865 22496 21717 22289 21517 22039 21431 22215 21749 22419 22448 22348 22266 21853 21470 21337 21281 21709 22056 22864 22185 23015 21888 22557 21589 21508 21158 21776 21928 22452 22741 22081 22221 21491 21297 21610 22093 22761 22055 21888 22070 21531 21865 21946 22481 21869 22272 21690 21834 21619 22108 22221 22160 22044 22407 21548 21879 21772 22573 21814 22431 21609 21986 21425 22319 22030 22389 22118 22199 21676 21932 21576 22377 21637 22661 21517 22137 21595 22408 21990 22323 21603 22010 21449 22408 21712 22557 21637 22037 21525 22508 22016 22315 21562 21974 21447 22231 21797 22631 21565 22288 21432 22125 21676 22518 21968 22468 21419 21935 21513 22645 21647 22566 21572 21953 21675 22267 22027 22313 21949 22188 21755 21987 21532 21888 21519 21868 21589 21859 21531 21884 21629 21818 21577 21788 21547 21704 21895 21773 22004 22009 22631 22195 22829 22405 21946 21810 21124 21403 21899 57 3751 13223 14699 15303 15464 16187 17183 17362 18145 43383 27956 25100 23991 22797 22764 22289 22983 22096 22336 22391 22219 22064 22059 22343 22272 21923 22400 21859 22072 22192 22650 21703 21975 21915 22387 21671 21585 21478 22040 21851 22672 22009 22245 21591 22107 21664 22435 21799 22292 21553 22106 21335 22662 21944 22234 21612 22488 21537 22744 21298 22351 21476 22473 21554 22101 21811 22305 21394 22266 21753 22759 21650 22235 21334 21989 21679 22438 21951 22383 21681 22232 21409 22493 21696 22423 21252 22317 22144 22148 21567 22555 21671 22232 22011 21936 21664 22082 21821 22491 21408 22296 21879 22055 22047 22533 21602 21654 21580 21555 21827 22315 22073 22369 22066 22311 22050 22200 21771 21711 21741 21725 21127 21728 22291 23009 22297 21457 21588 22451 21769 21607 21540 22999 21880 21715 22180 22248 21912 22100 22009 21857 22005 21605 22393 21718 22272 21642 22282 21735 22321 21650 22337 22001 22200 21761 22536 21594 22368 21373 22480 21840 22183 22054 22308 21634 22647 21615 22090 22180 22181 21642 22733 21730 22023 21920 22506 21418 22293 21572 22506 21558 22192 22021 22459 21628 22129 21371 22775 21691 22246 21476 7060 15771 17920 17778 18591 18417 19319 18944 19913 19297 28807 23946 23380 22407 22865 22461 22897 22217 22645 21792 22371 21555 22151 21541 22151 21607 22326 21770 22542 21795 22729 22005 22464 21881 22394 21841 22125 21769 21941 21655 21773 21527 21696 21539 21351 21455 21806 21933 22307 21971 22359 22173 22589 22184 22860 22131 23054 22041 22872 21666 22237 21752 22133 21570 21481 21113 21543 21624 22192 22321 21948 22530 22250 22169 21484 21993 21696 22096 21985 22363 22311 22096 21855 21892 21641 22141 21885 22607 21697 22345 21761 21986 21700 22445 22204 22191 21508 22096 21784 22425 21712 22468 21545 22050 21554 22404 21913 22289 21741 22217 21469 22415 21657 22656 21574 22039 21633 22531 22030 22007 21439 22510 21720 22685 21442 22276 21714 22444 21723 22140 21687 22611 21655 22173 21444 22459 22000 22777 21427 22356 21667 22709 21733 22234 21754 22301 21581 21949 21753 22651 21701 22075 21861 22295 21784 21912 21831 22653 21789 21995 21929 22215 21703 22048 21828 22586 21623 22164 22256 22095 21577 21923 22097 22877 21325 21774 22748 21747 21301 22770 21729 21416 21751 22304 21591 21474 22200 22903 21377 21926 22765 0 17657 20493 19700 19945 21226 20033 20719 20870 20894 28686 24410 22688 22550 22615 22170 22077 22609 21886 22355 22344 21979 22098 22678 21543 22466 22010 22000 21971 22353 21613 22304 21829 22285 21721 22103 21998 22259 21702 22732 21639 22370 22099 21905 21710 22515 21607 22306 21379 22640 21504 22274 22227 22161 21659 22651 21354 22478 21714 22264 21620 22195 21861 22316 21552 22648 21564 22231 22072 22066 21846 22432 21491 22353 21543 22375 21603 22347 21950 22115 21804 22579 21264 22330 21576 22448 21705 22145 22150 21952 21831 22285 21732 22199 21660 22605 21450 22325 21732 22018 21741 22038 22160 21904 21916 22205 21734 22181 21501 23031 21136 22425 21840 22279 21803 21793 22766 21363 22119 21790 21923 21975 21331 22722 21754 21449 22742 22301 21257 22873 21601 21679 21965 22151 21714 21720 22354 22309 21827 21901 22614 21980 21989 21829 22247 22137 21742 21769 22344 21920 22088 21601 22361 22230 22065 21746 22519 21760 22129 21595 22352 22072 22145 21570 22434 21867 22743 21654 22112 21367 22097 21640 22407 21989 22355 22088 22283 21947 22282 21899 22311 22066 22530 21812 22405 21396 22101 21074 22685 21811 22012 21680 19612 20098 21936 20825 21664 21089 21969 21203 21678 34349 23890 22118 22596 21617 22599 22071 22357 21873 22547 21390 22436 22137 22444 21617 22545 21716 22166 21382 22339 22169 22576 21566 22144 21926 22314 21640 21959 22023 22616 21806 22044 21899 22224 21660 21841 21748 22749 21911 21719 22035 22145 21312 22112 22712 21824 21712 22400 21676 21604 22887 21806 21927 22016 21209 22953 21465 22359 21431 21975 22455 21793 21931 21556 22827 21385 22021 21252 22568 21733 22195 21874 22197 21985 21806 22226 22026 22004 22511 21712 22034 21692 22307 21933 21974 21832 22266 21652 22320 21809 22085 21723 22272 21764 21959 21670 22631 21459 22448 22032 22472 21366 22509 21732 22529 21398 21643 22011 22583 21617 22241 21506 22586 21594 22696 21731 22229 21529 22046 21609 22295 22030 22440 21949 22487 21638 22299 21352 22136 21325 22279 21579 22515 22044 22433 21677 22592 21704 22658 21643 22606 21607 22724 21567 22489 21590 22376 21793 22635 21755 22345 21645 22135 21573 21999 21380 22169 21613 22258 21865 22401 22034 22453 22243 22292 22185 22233 22135 22205 21794 21554 21248 21534 21729 22377 22229 22650 22235 23123 21924 22503 21658 21551 21144 21790 22294 22493 22653 21676 21457 21421 21847 22824 22284 23019 21760 21703 21531 21969 22489 21766 22317 21459 22124 22116 22091 22030 21823 21753 22136 21957 22580 21768 22071 21989 22339 21969 21932 21705 22543 21893 22355 21469 22328 22071 22311 21600 22193 21798 22479 21276 22256 22141 21872 21538 22434 21669 22558 21304 22351 22016 22288 21323 22381 21625 22267 21444 22405 22037 22141 21685 22544 21722 22189 21632 22448 21912 22091 21697 22669 22115 22093 21901 22152 21624 22476 21767 22093 21426 22511 21794 22054 21668 22596 21403 22511 22001 22072 21840 22557 21456 22231 22224 22055 21582 22534 21830 22121 22094 22263 21543 22509 21635 21967 22056 22215 21613 22615 21777 21989 22628 22102 21204 22615 21623 21413 22599 21893 21536 22898 21405 22072 22725 21499 22064 22537 21287 22417 22420 21447 22146 21672 22026 21925 21396 22985 21661 21772 22635 21656 22329 22016 22018 21880 21991 22055 22075 21736 22452 21664 22299 21862 22101 21821 22141 22244 21951 21998 22225 21837 22361 21531 22517 21536 22505 21884 22215 21728 22267 22096 21896 21781 22104 21792 22250 21593 22721 21512 22434 21425 22748 21377 22528 21558 22679 21611 22295 22007 22087 21655 22039 22041 22069 21828 22247 22023 22253 21755 22535 21597 22349 21577 22599 21390 22231 21411 22612 21281 22184 21435 22584 0 5756 9533 13636 13094 14706 14193 15770 14807 43357 35357 26731 23651 23646 22797 22919 22192 22417 22373 22211 21961 22284 22337 22008 21904 22115 63 5757 14416 16390 17115 17600 17619 18301 18523 18447 43399 28496 24858 23616 22772 22540 23274 22045 22115 21991 22816 21811 21883 22000 22496 22068 22232 58 15305 17932 18199 19274 19911 19344 19460 19728 20328 33041 25077 23190 23468 22333 22583 22167 22871 21723 22429 21801 22645 21776 22132 21837 22548 21635 12041 18201 20536 19616 20759 20064 21314 20541 21056 20737 26588 23228 23061 22394 22679 21949 22551 22153 22414 21830 22343 22149 22212 21879 22282 22019 22400 18521 21250 20503 21686 20780 21932 21385 21665 21549 35032 23192 23201 21613 22560 22180 22185 21903 22808 21371 22595 21908 22106 21824 22688 21337 22564 21968 22076 21819 22533 21294 22232 22062 22157 21613 22661 21641 22327 21218 22375 21790 22397 21933 22256 21841 22294 21697 22224 21882 22147 21926 21522 21929 22293 21988 22240 21959 22228 22070 22374 21885 22224 21593 22019 21468 22019 21600 22181 21560 22373 21685 22215 21547 21638 21221 21415 21078 21583 21681 22439 22701 21921 21733 21377 22017 22931 21240 21432 21774 22304 21896 21528 22134 22816 21031 22331 21977 21815 21990 21351 22524 21703 22281 21897 22071 21749 22005 22114 21952 21947 22008 22166 22069 21989 22056 22076 21965 21986 22033 22121 22016 21864 22234 21960 22080 21968 21967 22076 21911 21628 22130 22035 22212 21706 22357 21616 22682 21417 22203 21612 22375 21984 21960 21722 22340 21625 22710 21291 22272 21657 22343 21833 21952 21707 22274 21619 22669 21415 21971 21836 22091 21880 22586 21568 22407 21395 22436 21961 22006 21658 22510 21526 22755 21632 22333 21880 22191 21654 22573 21145 22187 21645 22052 21984 22478 21421 22343 21736 22223 22041 22243 21462 22330 21527 22424 22048 21855 21556 22363 21609 22200 22074 22148 21583 22320 21499 22456 22082 22160 21740 22392 21594 22164 22217 21883 21604 22160 21705 21712 22585 22496 21112 21934 22131 21719 21925 23015 21728 21619 21923 22202 21213 22949 22212 21403 21810 22343 21281 22515 22666 21671 21709 22341 21388 22105 22761 21832 21444 21860 22272 21645 22292 22208 22287 21451 22149 21984 21849 21793 22448 22043 21816 21613 22208 21763 21885 22011 22531 21815 21874 22118 22357 21592 22123 22018 22510 21676 21919 21671 22459 21665 22082 21943 22413 21350 22103 21795 22295 21478 22423 22060 22368 21401 22130 21664 22477 21500 22224 21926 22776 21373 22166 21549 22470 21595 22160 21625 22552 21974 22345 21369 22197 21651 22414 21712 22392 21598 22450 21969 22739 21745 22017 21213 22496 21625 22368 21794 22318 21547 22200 21924 22723 22106 22464 21447 21959 21276 22330 21632 22458 21787 22507 21568 22161 21544 22264 21961 22728 22128 22567 21857 22258 21587 21993 21548 22227 21622 22184 21879 22320 21669 22022 21546 22185 21912 22421 22016 22606 22105 22337 21648 21827 21265 21580 21657 22137 21986 22173 22135 22358 22009 21985 21471 21400 21228 21495 21390 21921 21915 22459 22329 22956 22741 22768 22536 22417 21908 22032 59 227 9600 12997 13953 14839 15025 15448 15389 15746 43306 28800 24677 23336 23063 22467 8045 15149 17242 17657 18224 18336 18744 18774 19083 43371 28932 24630 23684 22966 22928 10181 17262 18394 19395 19113 19817 19559 20297 19916 43361 27437 24824 23444 23590 22852 11543 18802 20793 20455 21169 20708 21116 20434 21037 20425 26728 23127 22989 21983 22514 8797 20333 20448 21238 20892 21750 20942 21740 21040 21900 25172 23246 22297 22805 22030 22699 22041 22650 21979 22628 21942 22589 21771 22359 21681 22445 21534 22369 21526 22249 21474 22213 21608 22133 21498 22170 21632 22267 21773 22528 21946 22679 22093 22773 22005 22608 21865 22567 21671 22046 21378 22124 21405 22241 21976 22226 21709 22272 21829 22384 21815 22233 21665 22174 21531 22203 21872 22593 22128 22340 21596 21856 21447 22184 21767 22241 21783 22361 21650 22068 21677 22338 22191 22545 21848 21457 21536 22116 22033 22093 21272 22251 22733 22468 20967 21418 22098 21584 22252 22017 21751 22389 21481 22469 21831 21745 22820 21456 21688 23011 21069 21490 21351 22416 22694 21845 21288 22384 22077 22368 21197 21800 22606 22107 
22290 21523 21925 21595 22305 21416 21788 21799 22160 21191 22097 21431 22265 21688 21937 21487 21639 22007 21783 21571 21826 21372 21985 21916 21926 21304 21751 21644 22097 21667 22066 21740 21860 21580 21962 21513 21878 21555 22007 21684 21945 21549 21760 21367 22208 21996 21877 21136 21674 21532 21997 21792 21432 21268 22016 22547 22592 22089 21323 20776 21370 21360 21856 22020 21976 21302 21121 20949 21611 22272 22441 22438 22851 22603 22880 21732 21645 21400 21775 22024 21799 21989 21703 21387 21753 21497 22147 21543 21522 21463 21738 21977 21859 21753 21661 21221 21780 21489 22298 21703 21612 21356 21700 21721 21783 21958 21991 21506 21596 21175 21729 20809 22193 21468 22295 21666 21816 21417 21586 21351 22054 21829 21896 21914 22091 21773 22016 21325 21728 21127 21765 21568 22112 21472 22215 21601 22162 21552 21889 21403 21638 21248 21579 21362 21594 21236 21684 21408 21882 21827 21827 21927 21846 21925 21958 22016 21974 21945 22019 21893 22016 21977 21993 21831 21973 21920 21984 21520 21863 21608 21879 21664 21841 21949 22072 22018 22164 22479 22124 22508 22176 22574 22144 22593 4995 13712 15031 16344 16707 16288 16603 16869 17652 43329 25330 22459 22601 22174 22701 21943 22082 21765 21847 21656 21697 21476 21488 21381 21536 21721 21762 22097 21761 22204 21703 22200 21495 21957 21440 21657 21275 21529 21369 21879 21780 21932 21952 21760 21725 21490 21351 21418 21273 21688 21624 22145 21619 22205 21382 21853 21409 21617 21092 21911 21773 21936 21896 21929 21813 21755 21440 21600 21296 21765 21667 22237 21448 22156 21419 21653 21084 21857 21779 21865 21840 21708 21376 21674 21435 22137 21557 22253 21031 21705 21094 21772 21782 21924 21958 21741 21447 21445 21405 22072 21677 22304 21648 21735 21169 21764 21741 21963 21984 21840 21856 21666 21143 21601 21847 22675 20757 21191 21116 21532 22100 22032 22080 21463 20958 21511 21933 22732 21472 21336 20909 21727 22353 21721 22065 21129 20961 21079 21709 22503 21893 21888 21693 21342 21704 21674 22205 21703 21783 21397 21522 21809 21876 22048 21751 21410 21450 21511 22042 21716 22276 21632 21975 21549 21723 21573 21576 21426 21676 21283 21643 21239 21589 21453 21826 21309 21826 21487 22103 21447 22187 21498 22326 21681 22164 21601 21737 21306 21571 21451 21852 33 17281 18275 18897 18352 19143 19204 19852 19397 19768 26028 22192 22291 22042 21228 22042 21548 22106 21229 21926 21611 21866 21607 21767 21474 22266 21184 21951 21529 21822 21287 22194 21870 21847 21383 21917 21683 21927 21377 21597 21197 21888 21917 22289 21872 21856 21204 21307 21181 21376 21317 21997 22444 22498 21034 21708 21913 21131 22384 21476 21474 21431 22536 21178 21860 22542 21260 21513 22574 21646 21080 21100 21693 22471 21799 21961 21569 21372 21527 21592 21984 21784 22068 21646 21612 21927 21666 21504 21574 21779 22103 21293 21986 21637 21837 21569 21964 21600 22103 21201 21863 21572 21607 21900 22132 21351 21632 21436 21909 21657 22030 21559 21845 21504 21825 21495 21916 21593 21976 21639 21922 21507 21767 21320 21489 21621 22348 21706 21733 21460 22077 21544 21734 21679 22253 21236 21801 21623 21681 21676 22296 21244 22010 21368 22137 21548 21946 21424 21749 21900 21704 21554 21737 21992 21674 21478 21674 21751 21952 21327 22245 21349 21793 21955 21563 21492 21945 21303 21821 21768 21307 21607 22306 21008 21097 22509 21677 20871 22407 22010 21444 20964 21736 22478 21760 20899 21625 21693 22629 21632 21107 22166 18631 20196 19893 19447 19882 19596 20808 20725 20928 35917 22664 21987 21638 22140 21793 22213 21804 21728 21588 21415 21460 21745 21448 21642 21776 21732 21804 21872 22021 21990 21888 22034 21393 21781 21269 21623 21248 21577 21203 21740 21164 21664 21159 21666 21194 21668 21138 21820 21313 21881 21473 21936 21529 21954 21805 22065 21835 21977 21883 21952 21722 21906 21751 22048 21363 21770 21228 21706 21395 22074 21639 22330 21450 22131 21461 21849 21141 21713 21258 22007 21785 21820 21812 21986 21307 21463 21572 22144 21602 22137 20851 21555 21329 22024 21953 21834 21521 21623 21380 22032 21693 22241 21690 21649 20983 21888 21910 22004 22321 21777 20917 21461 21936 22788 21293 21175 21072 22003 22677 21248 20860 21512 22023 22775 21433 21168 21354 22147 22421 21459 21145 22226 21904 21810 21401 21648 22224 21560 21623 21383 21840 22087 21645 21407 21712 21735 21985 21312 21737 22021 21773 21416 21784 21654 22024 21403 21715 21972 21863 21312 21989 21657 21941 21259 22068 21928 21968 21400 22066 21577 21774 21371 22031 21943 21879 21376 22343 21480 21735 21667 21911 21431 21696 21684 21811 21259 22064 21953 21807 21403 22304 16199 20576 21109 21668 20741 21696 21185 21295 21489 21555 23013 22699 21649 21956 22001 21995 21251 22392 21441 21870 21944 21605 21620 22137 21372 21895 21913 21568 21741 22145 21291 21888 21588 21722 21552 21628 21777 21760 21344 22304 21557 21750 22301 21242 21839 22087 21040 22074 21045 22096 21520 21195 22355 21562 21223 22721 20992 22096 22124 21223 21856 21324 21894 21603 20984 22156 21465 21081 22598 21386 21594 22228 21517 21726 21752 21568 21901 21399 22114 21401 21867 21990 21383 21799 21668 21777 21798 21369 22200 21560 21976 21760 21797 21579 21608 22098 21641 21737 22021 21287 21904 21319 22236 21697 21939 21756 21779 21473 21635 22038 21847 21569 21968 21600 21857 21452 22250 21285 22017 21475 21877 21501 21576 21797 21876 21271 22321 21376 21693 21816 21907 21248 21880 21632 21949 21317 22112 21813 21734 21601 22279 21490 21691 21347 22058 21788 21687 21337 22064 21540 21942 21223 21901 21959 21646 21275 22032 21591 21862 21217 21991 22037 21637 21335 21943 21776 22233 21509 21943 21475 21639 21189 21880 21515 22066 22251 22077 22499 22087 22608 22085 22451 21856 21371 21120 20937 21847 21690 22482 21176 21655 22576 20997 20993 22168 20851 21877 20713 22699 20776 21914 24093 22886 21725 21927 21818 21469 22202 21686 21767 21773 21721 21402 21933 22088 21729 21463 21884 21580 21796 21302 21847 22089 22190 21381 21706 21828 21789 21552 21520 21824 22185 21493 21656 21703 21784 21004 21568 21751 22240 21495 21702 21674 21895 21180 22091 21842 21675 21486 21936 21397 22073 21813 21612 21744 21840 21621 22249 21409 21973 21217 22265 21205 22048 21545 22167 21452 22075 21544 22300 21276 21981 21335 22284 21575 21755 21907 21679 21451 22081 21419 22054 21187 22258 21668 21735 21941 21984 21312 22235 21731 21532 21583 21975 21280 21942 21674 21897 21299 21834 21912 21735 21422 22313 21739 21533 21544 21904 22338 21803 20910 21318 21465 22775 21920 22016 21218 21047 21017 21442 22308 21899 22592 22149 21559 21478 20966 21015 21024 21384 21358 22545 21600 22288 21687 22065 21807 22068 21936 22153 21781 22116 21829 22107 21730 21975 21723 22186 21960 22068 21757 21878 21720 21751 21664 21478 21702 21309 21447 21459 21824 21598 21970 21627 22083 21684 22177 21600 22273 21493 22025 21465 21720 21198 21720 21573 22044 21604 22116 21920 21890 21909 21899 21424 21515 21415 21881 21775 22337 21479 21933 21317 21781 21592 22067 21879 22000 21481 21508 21523 22191 21495 22213 21385 21705 21680 22037 21825 21856 21336 21817 21704 22228 21852 21577 21580 22041 21865 21717 21320 21976 21696 22135 21446 21718 21862 21898 21440 21713 21748 22155 21484 21671 22133 21836 21289 21368 21968 22577 21225 21261 22253 21788 21034 21346 22069 22102 20898 22105 22650 21519 21133 21946 21703 21749 20967 22041 22551 21318 21037 22453 21549 20976 21860 21660 21593 21729 21835 21612 21495 21800 22030 21300 21809 22004 21486 21805 22192 21391 21863 22071 21920 21569 22215 21393 21506 21984 21870 21456 22029 21511 21689 21793 21864 21341 22055 21570 21639 21829 21884 21323 22354 21504 21638 21712 21904 21254 22252 21161 21768 21944 21848 21605 22287 21353 22026 21750 21639 21698 22273 21150 22073 21469 21877 21418 21648 21941 21936 21484 22243 21378 22064 21866 21600 21543 21831 21556 21851 21282 22272 21295 22085 21576 21765 21548 21664 22025 21617 21624 21971 21577 21793 21345 22157 21393 22048 21716 21719 21552 21582 21994 21541 21722 21673 21481 21815 21296 22579 20807 22052 20987 22673 21224 22151 21601 22105 21432 21225 22498 21104 21892 21004 22523 21282 22049 21446 22214 21475 21917 22411 21296 21796 21125 22648 21043 21925 20992 22377 21579 21722 21596 21974 12995 16173 17251 18400 18177 18439 18333 18867 18432 35766 23882 21935 21832 21760 22082 21536 21779 21319 22177 21175 21827 21330 22201 21285 21923 21368 33 17425 19402 19111 20111 19437 19991 19644 20386 19785 26870 22169 22426 21703 21973 21415 22360 21256 21872 21313 22238 21349 21837 21472 22072 21416 21736 15209 20259 20188 20210 20424 21095 20328 20805 20552 21176 23335 22341 21541 22384 21468 21899 21347 22264 21176 22090 21275 22331 21191 21805 21376 22296 21221 19415 20411 21472 20667 21363 20787 21933 20875 21392 43232 22880 21728 22048 21872 21852 21522 21828 21783 21716 21525 21678 21935 21360 21696 21722 21743 21216 20614 22281 20611 21943 20807 21832 21184 20890 22448 24763 21703 22874 21125 21468 22536 21294 21696 22708 21004 21793 22391 21191 21644 22690 21028 21888 22528 21096 21847 22218 21485 21668 22118 21504 21504 21936 21752 21787 21368 21504 21753 21870 22154 21714 22128 21612 22087 21577 22125 21591 22152 21497 22274 21533 22003 21553 22299 21623 22252 21585 21738 21291 21492 21383 21889 21606 21785 21793 21780 21785 21858 21780 21770 21498 21820 21303 21842 21193 21675 21579 22177 21480 21968 21312 21764 21934 21784 21252 21761 21632 22059 21138 22076 21942 21595 21590 21943 21362 21897 21328 22274 21334 21941 21684 21674 21527 21793 21881 21498 21651 21806 21703 21710 21569 21954 21656 22008 21658 21739 21845 21763 21576 21933 21756 21863 21696 21568 22027 21524 21516 21773 21877 21876 21385 22093 21405 22212 21074 21856 21468 21968 21940 21362 21814 21493 21730 22608 20841 21745 21656 21985 22154 21098 21776 21504 21597 22745 20954 22081 21956 21072 22154 22272 21287 22040 21080 22008 22315 21072 21652 21880 21208 22695 21179 21397 21950 21463 21818 22049 21464 21619 21901 21364 22119 21669 21745 21591 21805 21572 22104 21646 21575 21776 21504 21824 22156 21300 21930 21852 21625 21626 22272 21347 21621 21744 21675 21677 22319 21299 21817 21620 21733 21459 22244 21446 21710 21585 21813 21408 22215 21765 21547 21428 22006 21336 21936 21937 21845 21333 21789 21674 21641 21958 21949 21209 21881 21627 21692 21715 22232 21376 21914 21618 21763 21510 22272 21376 21648 21558 22203 21253 21904 21850 21997 21346 22005 21723 21744 21534 22323 21696 21528 21097 21961 21601 21671 21799 22280 21608 21573 21336 21974 21441 21734 21882 22284 21458 21616 21506 22058 21480 21577 21889 22134 21236 21845 21673 21927 21239 22016 22034 21916 21031 21664 21683 22082 21120 21410 22250 22681 21072 21399 21443 22083 21606 21099 21349 22391 22418 21925 20967 21296 21369 21853 22050 21806 20918 21997 22610 22656 22075 21108 20972 21370 21591 22129 21863 21411 21509 21537 22008 22086 22245 21881 21706 21371 21449 21819 21637 21665 21784 21890 21636 21435 21513 21620 22007 22075 22279 22042 22185 21808 21795 21428 21636 21668 21734 21573 21903 21648 21781 21385 21649 21434 21894 21760 22203 21961 22249 21934 21906 21270 21576 21217 21650 21520 21797 21527 22040 21697 22046 21568 21850 21293 21666 21378 21605 21441 21753 21645 22029 21848 22200 21949 22298 21872 21952 21619 6101 15763 17736 18029 18689 18477 19061 18608 18934 18576 25601 22160 22105 21466 21813 25 18928 19310 19997 19627 20258 19832 20455 20052 20577 26753 22874 21968 22186 21656 22016 18912 20401 20312 20676 20413 20675 20389 20824 20622 30720 22724 22538 22041 22365 22048 19539 21086 21654 21340 21721 21424 21399 20999 21287 20852 22502 21450 21464 21095 21125 17431 20628 20551 20846 20705 21011 20730 21463 21348 21287 22289 21930 21725 21987 21885 22030 21943 22161 22001 22181 21921 21945 21729 21772 21287 21505 21265 21483 20999 21193 21016 21225 20839 21024 20881 20935 21500 21574 21760 21591 22010 21904 22085 22011 22147 21994 22032 21922 21841 21409 21415 21332 21435 21449 21996 21555 21725 21569 21879 21744 21911 21741 21734 21436 21655 21254 22043 21961 22176 21821 21752 21236 21488 21495 21769 21531 21878 21743 21739 21222 21640 21528 22288 21920 22064 21304 21652 21433 21957 21614 21611 21601 22202 21786 21541 20808 21987 21320 22050 21404 21976 21606 21851 21690 21845 21381 22233 21351 21815 21892 21816 21424 21560 21616 22289 21273 21639 21548 22016 21752 21691 21321 22079 21608 
41195 33261 37504 34107 41378 42218 36347 36304 39927 40051 39574 42496 41680 35216 37632 43128 34780 38670 36216 33607 36288 41708 38471 37632 37699 40888 36119 34450 39310 34873 38948 35828 36838 33800 37939 32944 37027 33487 38584 34999 37824 33557 35372 41697 40720 38695 37275 38992 34981 33067 38436 36019 42114 40657 38502 33762 33883 39246 41302 35367 41641 41627 36966 38498 38223 40962 39072 37358 34349 40924 43291 43353 37495 34520 37261 35812 37888 34552 43222 36271 33525 37796 38789 33267 40648 35989 36948 38346 37038 40512 41634 42796 34952 32647 36352 38262 33948 33714 35973 40720 34689 34127 36263 34695 32888 39687 42418 36247 35840 40760 39122 36530 40422 42861 41872 34884 36256 42048 34013 41425 39172 36708 37192 37525 39552 36103 38272 41319 35559 39104 35907 33352 39360 42626 41152 34195 39936 33387 36924 42005 34609 39925 34009 41344 34192 40149 35077 41687 37445 36593 36532 37760 36827 37648 38057 38370 38293 37980 38592 37320 38327 38353 38552 36769 38234 37443 38181 32864 36913 34050 37168 34540 36523 38029 39168 38513 40167 43840 40160 44007 40480 34332 39648 34307 30738 31896 36078 40028 32742 39122 31754 34267 32640 41316 43056 43684 34696 40312 35804 37929 39249 35904 36873 34545 34938 42576 42985 41963 33280 35293 35556 39353 35752 40645 35491 40490 43265 38320 42215 34919 40564 33319 41497 37505 35908 37699 37801 35579 35575 42769 41849 42344 40809 35143 34208 39730 34445 40704 41828 37241 41857 34439 38548 37625 36021 37556 37219 37733 36472 35982 42080 34097 40487 35932 34722 41064 42545 40378 42392 34868 38579 36913 35960 37013 36557 35291 41313 35063 42296 40252 33698 41216 38409 35337 38713 35953 35954 37498 38052 35879 42449 42672 42353 39378 35149 41320 34524 35625 39441 35781 35769 38136 38224 36599 36739 34656 39248 34067 36784 35180 35072 39817 39200 33273 39264 38630 39205 42816 37710 32982 37676 35959 42444 41477 37065 35731 42001 35718 39019 39191 37402 38708 35483 43760 37553 37031 35248 41361 35339 34789 40711 35484 36066 41812 33164 36088 37056 38730 36025 41843 42680 33257 38668 35383 41100 34327 38240 33556 35431 33600 33475 41911 35136 40576 34727 40416 34085 42455 36693 41124 36637 43075 39968 42660 40856 43226 42176 35126 40003 34120 35528 40867 33843 42403 37131 18080 37634 39457 35885 39968 38756 38900 36138 41034 35217 40331 40592 41608 39042 40388 39008 33509 39436 40513 37818 34332 36935 34241 35752 42532 41680 39763 38292 33218 36455 40770 40620 37378 36937 41754 37864 35043 37680 41541 34378 39899 37097 37671 41360 37156 36758 39899 41200 40051 41550 41315 38848 43225 43896 38377 35344 37444 39224 42480 42951 42944 42656 33728 39559 36985 33701 40230 33052 33932 34440 38443 38935 35324 43367 36612 38071 33646 41564 33435 33675 38008 35991 39047 34688 34113 37612 34693 32471 33452 35802 39626 41041 38455 34478 36677 33522 37959 33920 39520 39976 37249 33589 34068 37204 39840 41696 34357 42192 37681 34696 38677 33717 36635 32556 36225 43017 37804 34017 38042 34548 37396 32840 35721 40945 43027 34624 42004 35517 35573 42363 39651 33383 35448 35038 41287 40488 36411 34450 34758 34789 41306 40681 38848 41685 40225 33587 37753 42017 36057 37320 35148 33280 35457 38309 34917 42656 35104 35888 37705 41440 41372 41664 36272 37973 33730 42674 38151 41081 36816 35719 41004 34449 41365 37760 38979 44064 35329 36277 42732 38932 42353 37584 35609 43474 35800 36576 34416 35137 34648 33991 38832 40323 33188 39549 36648 41766 36627 33306 35384 34787 36662 34176 34792 38294 34470 39958 36183 40732 36458 35329 33705 41984 42729 35952 42272 34708 35658 35445 36245 36919 38586 38504 37056 38640 41768 36218 40456 34629 39910 33901 39824 35865 39484 34668 39440 34759 39749 34821 38979 36592 40874 37424 42624 37844 33172 37700 36433 39021 36843 38289 37441 37801 35525 37240 35979 38657 41704 36069 40233 35392 41719 39450 34634 41805 42696 40197 42752 37112 39247 35366 40259 38886 36155 36485 36296 38214 41128 42906 33874 39596 34112 39889 36432 33457 40920 38699 37964 36686 32922 34254 41382 38715 35338 40947 35216 34377 37632 37008 37428 38549 41817 36048 36841 42541 37840 36352 40872 39950 38452 38658 35337 40016 36455 32737 38503 36641 42284 39628 41616 40184 43016 42864 39554 40928 37388 36298 41875 34571 40601 33648 34313 41622 36737 39459 34716 42041 35378 35680 38236 40841 35849 38538 36072 41927 36161 34579 38428 42095 35600 38061 37159 40795 38592 34758 37778 40499 39246 37712 37970 41829 39256 33881 35859 41728 39111 38084 37356 41394 42368 43008 36016 34720 37476 42380 35168 34850 36295 40412 39080 37994 36580 41984 41651 38932 32970 38820 34709 34688 34842 39538 41123 43044 33748 38891 35696 34392 37792 38532 38640 40339 42724 42537 37440 37845 34186 34112 39890 41876 37571 37559 33458 35673 39808 40992 37184 33832 35309 33184 34253 35724 35479 41092 41607 33748 35670 41624 40660 37078 39496 38061 39305 38348 39342 32945 39755 42321 33846 40141 35844 37328 39301 39987 40420 36917 41163 37415 34121 37448 40096 42816 38906 34425 41585 34181 40743 33248 35457 35712 33347 37296 41964 39840 42075 37376 38475 41836 36539 34698 35744 36153 41647 40775 33634 38032 35588 36128 33825 33911 39265 34544 35572 38528 40867 37383 41189 41265 35236 37744 35982 35904 42564 34608 38691 36968 33550 37833 33890 36712 42440 41495 40898 38629 42832 37440 43211 33938 36064 37059 40602 41894 41637 35460 36301 37391 40045 37276 34154 37960 41072 39689 36560 35584 33907 41220 43037 35489 41320 39238 36221 35082 41224 39111 33300 37709 40342 37592 38176 34662 40550 38672 34130 36867 40029 38664 38881 34505 41241 38136 35799 40969 33065 37815 42776 34781 39687 37258 33024 38849 41405 39610 43856 39792 34434 39255 43281 37002 41797 38983 37227 36944 35099 43271 39860 34848 33792 37443 37479 40149 36341 37180 34702 35497 35098 37430 40647 37761 35689 37700 36512 42752 40929 35233 35816 35952 35432 41812 38056 39361 35606 42613 37544 33828 35955 40849 37068 39414 40743 41849 35481 36410 36196 33216 32601 36113 40432 43175 34838 35214 35880 37770 33440 35777 40844 43304 35485 34797 37280 39749 39634 36780 34972 42829 37889 41904 39453 36555 34208 35444 36464 34304 41106 42087 38470 40101 41568 40224 38869 33462 40138 42674 39611 33378 41381 40812 38608 41440 41586 34032 35905 37365 35157 42454 39435 42362 39224 39889 41351 34900 35642 37808 38201 40856 41321 35787 33115 33844 38177 40480 38033 34925 37193 40871 36824 37404 35744 42213 41974 36022 33221 33071 37024 41856 36565 36849 41068 42862 36864 37401 38312 40096 38478 37972 42331 41840 37643 34096 39863 33753 42561 37675 37970 37845 41645 41892 33831 33728 41059 35342 38976 36624 39072 37705 40103 36154 39609 36719 39724 35604 38292 35655 40406 38125 39141 36149 37152 35372 35890 34500 42628 35493 41024 42705 42841 36579 34105 37943 34563 39200 35017 40160 34024 40994 43175 38944 42741 35643 39936 35489 33613 38715 34082 39527 37512 37133 37480 37439 42016 33281 41952 37462 36144 41850 43142 38149 41121 36181 33815 39009 37417 38410 42912 33045 32832 40516 43272 41079 41933 35482 34689 38688 36528 36722 41179 36648 35133 40768 36973 33752 33623 38689 37134 35414 40919 38338 35026 39991 42553 35667 36939 37303 42139 35489 35664 40112 43045 35191 39872 36808 40761 41744 38195 34080 40116 40635 41531 36320 38068 41319 39408 39697 36624 39589 35182 33064 39043 37984 35384 35785 37472 38861 33943 40919 38401 43280 33840 37243 36882 34704 33872 35313 36684 34217 42913 36416 38784 40855 36448 38508 43063 36679 40359 42138 37336 39340 37476 33561 40723 41897 32946 37985 37248 42322 39029 33082 34908 35954 36899 41456 39296 33666 34336 36461 37280 41216 42294 32869 34191 35009 37122 40294 41405 39783 35847 37776 36784 34112 41463 41722 38845 35947 34418 34927 41041 39616 39388 42925 37450 42140 34581 37767 37625 42880 41412 41728 39142 37172 33859 33255 36530 33374 36796 40524 41171 41231 39552 33792 35625 33339 34362 38528 34288 34171 38073 33793 35918 41245 40407 41870 38956 35418 35440 33184 33702 38336 33353 35312 34789 42693 36784 40624 34297 35591 38816 37898 35127 40048 40249 34176 39468 42315 40481 43800 39024 37259 37725 44144 40892 39023 42505 41014 42952 37927 42860 40896 36288 39001 35037 38080 37716 37384 42496 34127 35350 33942 37944 34834 38343 38558 40640 38340 30747 39779 35648 30236 42265 38482 38005 36581 35509 39152 33120 35798 41104 40465 39920 36697 41087 40870 40880 37801 41621 18295 29046 40698 38400 39109 41781 37824 33852 41408 35510 39072 40347 43072 35576 38180 42200 42450 40475 37121 40901 41384 41640 37016 42491 39416 42085 35813 37969 40397 39895 40114 42162 39156 41139 35799 32592 39396 42519 42313 33559 42185 42938 37687 41444 41529 39787 39545 40791 42229 40139 36568 41352 41635 40407 41578 42321 42791 34498 41481 35595 37808 36467 41548 40656 37494 35398 38644 37041 36875 32921 36278 36096 35240 33004 34818 37881 41408 35158 35402 35856 39985 33530 41168 33552 37825 35770 36449 39526 36612 42933 37161 35308 37412 39063 42759 33737 40747 35099 35468 37665 36070 42703 40176 34626 35184 37824 37014 33221 38555 36973 40843 43204 34987 39681 32729 32349 37384 35807 36128 41549 32806 35691 37123 40075 35408 39643 34358 39364 33866 39836 34176 39837 43172 41427 33528 38462 33447 41472 34680 41128 33962 35521 40779 43061 42072 37339 34167 35937 36032 35847 36026 36801 35901 35795 42960 36759 41024 36788 39847 35096 33768 40103 42891 38257 40852 35847 37824 35994 40138 35766 34084 39040 39160 39387 37985 34133 33781 37845 41504 37531 41017 41312 41495 38058 34989 34760 33088 35872 37219 43032 34869 36323 35281 35357 33475 37729 34580 38436 34725 35688 36736 35730 33584 37707 35963 37056 34952 33332 38584 33040 32753 35789 37164 37081 41714 39783 42219 40900 38615 36824 42659 38240 37799 41546 36637 42928 35765 34213 35943 35648 34480 38185 40102 38992 35856 32500 33930 35951 37224 39145 38008 38368 40152 41122 41053 38928 38616 38673 41908 38540 34589 37025 39953 35697 39732 42016 38300 42774 36738 38827 42626 34582 37356 41541 40098 34949 35584 33968 36277 33544 39352 34688 33703 35598 32505 36136 40057 40919 37865 36940 34407 34289 40880 41580 34602 35473 34905 34933 41880 41075 36679 34233 35489 42469 41312 42596 35687 33712 36256 41737 41123 35976 33408 41943 38857 41280 37810 37770 36800 41265 36423 34843 34336 37924 38093 40120 37408 34552 35000 35301 40834 41553 37683 34246 35616 32784 40816 41548 34573 33418 40602 40471 37364 36881 38611 41376 38838 35680 35507 33229 41642 35151 32920 38709 38163 34032 34784 36236 41173 34272 33559 41088 38403 42308 35870 37222 41368 42649 34360 32556 38837 42799 34048 36992 39947 40407 36920 34887 37668 40536 38488 38720 37610 38156 34596 34880 39096 38871 42000 41475 35496 38247 42049 42624 39587 34242 38819 41561 42976 42974 37900 37584 40672 41891 37235 38853 36469 36864 38656 34488 34615 39244 38966 37625 41754 34277 39700 37218 42003 33119 32951 38403 39425 41287 37448 35270 41703 42706 36822 34390 34539 35840 37052 34275 42249 33185 34069 38624 39443 41507 39046 40565 36316 36134 42068 34520 34562 35504 33618 37418 34347 35879 41636 34676 42176 37486 35568 40712 38248 41282 38045 37349 40502 33808 39891 34597 32689 36016 33152 38563 35130 38912 33523 36681 40877 34838 41379 34344 42096 36129 34568 38688 36832 40554 38240 41600 37152 37769 34344 32681 33813 33454 36866 33340 31009 37399 32481 36125 32140 34878 39865 39744 42804 36672 18073 35255 40246 37835 33728 40052 35984 42512 38400 33072 37328 37482 37990 40498 34712 38065 36058 41705 41093 34293 41975 34403 41591 35957 33576 38520 35795 33476 38689 42506 38980 32660 38604 34672 41235 35665 41920 42200 37957 40840 36281 43661 42785 42821 39168 39143 30369 33192 32645 36013 34460 37660 34960 42572 41600 41027 41545 37913 35696 38343 37484 38819 38069 40128 38645 40490 37664 37943 35507 35792 40736 32872 40137 43083 37992 39895 37888 40274 36272 37735 36360 37120 43075 34001 35410 33957 38555 37273 39382 38912 40069 38614 38599 37568 36672 41859 42400 41413 42650 42752 38709 33570 35472 33472 37164 35589 37506 35845 35567 42240 34967 40213 39114 38182 40204 36764 35765 40208 42880 43399 36160 33209 37040 35945 35737 40122 34486 32905 41008 37573 38952 40917 34695 42179 38263 34404 34163 33853 40528 36213 33250 35488 38332 41045 39032 42023 38388 34209 36835 35063 36715 41618 41259 41787 36736 37139 36381 41959 33696 33932 41176 40800 34681 33266 38156 35856 35165 41001 39685 34229 
22892 22977 22904 23076 22392 23241 22528 22876 22391 23355 22400 23135 22461 23267 22515 22883 22445 22615 22868 22915 22461 22984 22464 22608 22500 23136 22889 23242 22747 22811 22449 22816 22479 22636 22342 22531 22243 22677 22393 22644 22581 23100 22820 22868 22154 23050 22427 22953 22543 22356 22519 23413 23356 22871 21815 22203 22421 22679 22929 22962 22160 21991 22285 22885 23388 23604 23380 22941 22227 22061 21888 22090 22103 22372 22088 22124 22149 22116 21825 22252 22698 23348 23445 23335 22565 22056 22336 22963 22958 22579 22907 22105 22806 22987 23024 22189 22877 22673 22760 22225 22919 22885 22484 22740 22532 22262 23105 22618 22689 22589 22574 22684 22951 22167 22925 22351 22867 22855 22697 22503 22465 22793 22554 22637 22656 22709 22772 22503 22692 22723 22845 22472 23191 22727 22679 22432 22584 22925 22742 22421 22772 22406 22952 22004 23251 22239 22772 22487 22752 23224 22826 23170 22792 23149 22720 22916 22644 22887 22547 22737 22485 22656 22491 22689 22549 22757 22434 22616 22392 22575 22382 22279 22283 22138 22088 22258 22146 22453 22528 22585 22550 23073 22518 45 5911 9761 10722 12432 11905 12800 12091 12468 12189 33094 27393 25495 24618 24368 24199 24257 24392 24037 24492 23812 24302 23535 23819 23500 23514 23162 23237 23008 23340 23000 23522 23405 23687 23620 23458 23257 23360 23075 23184 22871 23148 22983 23565 23093 23743 22999 23773 22985 23328 22556 23062 22698 23384 23049 23395 23223 23309 22951 23191 22556 22933 22615 23153 22856 23594 22958 23587 22664 23133 22453 22952 22538 23275 23086 23220 22976 23040 22561 23046 23015 23527 22747 23568 22140 22985 22407 23216 22988 23216 22994 22997 22484 22864 22896 23235 22920 23416 22568 22886 22464 23150 23000 23130 23136 23008 22521 22698 22539 22938 22927 23449 22708 22984 22263 22757 23107 23191 23022 22381 22188 22459 22965 23873 22784 22976 22164 22470 23084 23196 23469 22685 22118 22479 23241 23779 22795 23418 22373 22183 22592 22863 23351 22649 23075 22423 22889 22868 23036 23149 22859 22623 22601 22798 23188 22711 23316 22711 22802 22326 22965 22841 23093 23034 23112 22932 22948 22999 23020 22863 22983 22882 22921 22892 23033 22957 23051 23027 23181 22866 23223 22761 23153 22509 22958 22227 22807 22636 23122 22585 23341 22604 10092 12751 14440 14377 15392 15505 16068 15820 16164 15893 28024 25370 24695 24055 24441 23993 24049 23175 24283 23287 23636 23520 23394 23292 23444 22897 23793 23168 23244 23120 23325 22821 23059 23190 23644 23089 23291 22720 23126 23026 23274 22949 23221 22446 22681 22855 23716 23562 23501 23028 23023 22374 22567 22745 23381 22285 23485 23236 22573 23191 22537 23265 22836 22381 23881 22648 22250 23378 23016 22711 22306 22675 23565 23218 23108 22695 22507 22668 22508 23053 22922 23273 23079 22631 22745 22992 22940 22724 22794 23364 22549 22927 23096 22621 22864 22735 23032 22646 22625 23057 22349 23456 22657 23006 22640 23107 22647 22776 22421 23023 22760 23353 22887 23411 22929 23382 22820 23200 22597 22944 22423 22779 22568 23123 22610 22958 22304 22929 22790 23367 22382 22891 22725 23281 22328 23504 22928 22733 22660 22797 22311 23435 22280 23125 22327 23188 22615 23063 22551 22813 22890 22844 22552 22612 22871 22896 22570 23034 22528 23005 22348 23133 22772 22603 22921 22948 22373 23384 22564 22656 23478 22815 22086 23484 22964 22406 22329 22951 23020 22213 22617 23693 22897 22256 22295 22676 23565 22810 22055 22358 22845 223 16047 16399 17193 17638 18839 18304 18363 18091 18184 26881 25326 24444 24125 23916 23624 22995 23234 23019 23307 23058 23572 22951 23667 23031 23591 23010 23575 22892 23189 22728 23007 22554 22988 22562 23280 22704 22827 22785 23124 22901 23082 22784 23204 22857 23124 22681 23189 22506 22973 22389 22926 22320 22772 22337 22769 22455 22886 22491 23197 22681 23292 22656 23397 22609 23448 22528 23197 22535 22880 22237 22852 22682 23216 22881 23032 22695 23106 22577 22909 22305 22955 22707 23301 22521 23064 22414 22754 22329 23003 22907 22920 22824 22784 22337 22834 22777 23279 22509 22743 22279 22851 22957 22892 23088 22553 22167 22131 22603 23441 22792 23048 22061 22333 23196 23079 23223 22375 22198 23112 22907 22952 22030 22473 22715 23065 22831 22074 22419 23592 22606 22232 22224 22913 23261 22619 22588 22532 22941 22805 23000 22391 22894 22604 22874 22281 22839 22970 23174 22317 22944 22604 23003 22150 22944 22934 22584 22308 22859 22566 22959 22133 22984 22919 22660 22286 23172 22435 22663 22279 22969 22651 22573 22330 23135 22352 22750 22480 23010 22325 22647 22618 23085 22136 22966 22813 22972 22311 23197 22359 22664 22496 18485 18711 19926 19435 19812 19845 20265 19589 20457 39300 24204 23430 23648 22658 23592 22822 23093 22938 23176 22552 23472 22667 22990 23113 22553 22508 23396 22476 22836 22981 22819 22688 23239 22304 23115 22608 22735 22722 22717 22911 22849 22333 23416 22614 22698 23585 22245 22958 23111 22151 22974 22110 22696 22771 22089 23429 22361 22326 23642 21998 23076 22937 22231 22844 22384 22168 23009 22197 23011 22658 22023 23261 22480 22913 22774 22465 22528 22641 22752 22709 22549 23164 22432 22780 22880 22501 22656 22682 22754 22757 22423 23180 22072 23020 22281 23082 22273 22912 22912 22489 22538 22805 22516 22831 22400 23254 22076 23003 22214 23038 22740 22838 22737 22768 22320 22705 22711 22733 22544 23153 22119 22956 22401 22665 22505 22700 22357 23008 22257 22916 22296 22971 22117 22971 22827 22666 22295 23257 22439 22625 22396 22957 22528 22632 22305 23303 22378 22745 22162 22978 22819 22717 22250 23058 22484 22740 22161 22932 22805 22746 22290 22988 22487 22804 22214 22568 22482 22941 22867 22787 22706 22796 22327 22272 22071 22375 22343 22600 22513 22849 22464 21984 21934 22397 22784 22698 23433 22778 21937 22813 22773 17804 20640 21621 20624 22353 20761 21435 20708 22400 20662 23873 22439 23311 22939 22636 23002 22356 23110 22919 22684 22541 22915 22336 22481 22721 23225 22625 22511 22383 22848 22400 22553 22172 23072 22791 22649 22255 22912 22504 22959 22051 22984 22766 22816 22160 22839 22500 22724 22091 23004 22781 22785 22329 22912 22468 22681 22803 23102 22216 22944 22455 22625 22751 22554 22547 22631 22387 23127 22218 22925 22021 23283 22191 22898 22405 23134 22227 22907 22138 23201 22231 22761 22340 22957 22439 22467 22695 22793 22118 23168 22145 22697 22403 22575 22482 22768 22213 22710 22533 22612 22464 23053 22190 22639 22747 22587 22345 23109 22613 22424 22486 22791 22435 22280 22633 23319 22528 21958 22161 22540 23537 23028 22664 22144 21947 22476 22400 23555 22840 23226 22627 22164 21796 22124 22277 22247 23137 22610 23463 22769 23171 22807 22832 22655 22920 22553 22807 22548 22781 22528 22732 22611 22785 22624 22933 22576 22770 22503 22883 22567 23168 22603 23217 22502 23047 22389 22849 22426 22703 22298 22439 22088 22518 21991 22490 22368 22926 22607 22896 22750 22844 22694 22798 22235 22489 22029 22599 22186 22684 22420 23109 22346 23072 22373 22735 22004 22667 22521 22906 22654 22123 22128 22472 22216 22895 22404 23117 22363 22509 22127 22965 22741 22771 22243 22425 22236 23242 22295 22697 22150 22646 22614 22801 22484 22452 22431 23109 22400 22649 22076 22807 22832 22716 22227 22705 22459 22912 22337 22748 22812 22670 22152 22647 22735 23134 21968 22427 23256 22592 22022 22149 22857 23169 21728 22676 23444 22359 21912 23234 22434 22464 21859 23017 23382 22209 22130 23291 22513 22057 22285 22861 22710 22289 22861 22621 22405 22581 23051 22446 22652 22914 22091 22400 23053 22295 22396 22798 22699 22128 22975 22379 22435 22540 22694 22346 22575 22473 22810 22156 22886 22259 22746 22355 22824 22197 22741 22229 22671 22325 22632 22231 22896 22301 22592 22342 22733 22245 22768 22124 22962 22275 22584 22758 22680 22135 23245 22308 22621 22677 22760 22423 23038 22001 22955 22136 22697 22263 22497 22691 22640 22189 23107 22070 22868 22380 22539 22396 22551 22529 22205 22244 23122 21977 22827 22208 22950 22447 22584 22750 22408 22583 22579 22464 22668 22279 23086 22133 22841 22112 23061 22165 22733 22753 22213 22522 22167 23204 22261 22727 22391 22877 22689 22283 23144 22199 22776 21689 23507 21973 22915 22237 23104 22135 22790 22640 22590 22420 22144 23386 21984 22725 21958 23465 21909 22873 21912 22928 22147 22852 22375 55 7118 9495 10390 11616 11649 12225 12514 12740 12175 31597 27452 25713 25010 24686 24551 24050 23986 23952 23972 23688 23636 23616 23566 23447 23364 23423 10213 14027 14923 15492 16005 16033 16096 16465 16728 16641 28036 26028 25314 24910 24339 24348 24253 23984 23748 23791 23882 23489 23398 23465 23656 23356 23278 16604 17753 18255 18053 18720 18861 18794 18666 18982 34529 25709 24709 24468 24375 23772 23639 23783 23777 23602 23370 23548 23599 23433 23312 23320 23505 23410 19363 20056 20379 20576 20511 20705 20517 20837 20368 27027 23907 24141 23370 24138 23148 23556 23079 23920 22823 23492 22873 23840 22722 23385 23376 22921 18440 21045 22380 21420 21987 22361 21216 22149 21226 22448 23879 22924 24017 22957 22445 23859 23160 22533 23755 23127 22410 23973 22171 22450 23751 22706 22444 23811 22632 22515 23511 22796 22853 23032 23020 22567 22884 22933 23275 22741 22853 22465 22837 22765 23057 22996 23121 23015 22976 23053 23078 22864 23250 22930 23063 22969 23119 22744 23029 22317 22829 22381 22982 22568 23366 22579 23425 22761 23364 22739 23354 22706 23350 22657 23394 22490 23376 22481 23156 22441 22729 22310 23112 22951 22360 22316 22985 22567 23253 22154 22954 22876 22940 22321 23309 22346 22988 22884 22667 22649 22824 22535 22836 22351 23340 22298 23079 22200 23271 22184 22977 22680 22880 22394 22941 22732 22897 22383 22971 22609 23056 22386 22836 22728 22884 22581 23013 22503 23174 22419 22992 22355 23320 22265 22796 22493 22890 22853 22583 22576 22539 23022 22951 22429 23022 22154 23260 22976 22097 22720 22541 23279 22934 22372 22909 22103 22976 23296 22057 22529 22935 21942 23556 22310 22065 23060 22056 23184 23041 21996 22832 22439 22594 23485 22208 22865 22673 22592 22653 23152 22342 22820 22542 22593 22924 22644 22587 22829 22476 22689 22976 22614 22383 22849 22271 23117 22807 22485 22426 22930 22300 22844 22840 22592 22688 23027 22235 23057 22776 22499 22515 22956 22312 22971 22832 22680 22419 22869 22258 22827 22753 22931 22170 22794 22445 22749 22382 23263 22324 22674 22388 22786 22277 23184 22479 22593 22283 22957 22077 23202 22711 22691 22210 22977 22153 22953 22821 22725 22330 22772 22481 22496 22699 23203 22294 23000 22420 22983 22135 22992 22755 22957 22072 22779 22500 22764 22229 23088 22729 22721 22051 22679 22649 22704 22388 23040 22740 22621 22260 22749 22653 22684 22268 23079 22533 22407 22821 22797 22461 22445 22752 23203 22265 22157 22461 22857 22647 22012 22329 23545 23499 22039 22113 22528 22937 22509 21752 22460 23309 23527 22594 21900 22073 22528 22784 23021 22407 22057 22912 23557 23351 22701 21952 21969 22153 22472 22803 22759 22551 22172 22713 22674 23130 22811 22880 22451 22493 22214 22709 22464 22599 22600 22764 22448 22442 22247 22590 22620 22997 22761 23112 22644 22875 22356 22479 22111 22786 22369 22749 22508 22812 22287 22673 22080 22599 22406 22960 22752 23076 22711 23104 22408 22701 22004 22502 22135 22788 22337 22823 22362 22957 22485 22918 22225 22681 22039 22574 22099 22595 22265 22670 22401 23104 22812 23116 22727 23171 22599 23008 4429 9103 10104 11982 11757 12648 12467 13105 12784 43628 28336 26388 25190 25024 24186 11651 14717 15898 15804 16637 16161 16979 16661 17352 17008 29177 26103 25796 24910 24928 11477 18218 18435 18963 18746 19086 18832 19168 19025 19571 27776 25904 25117 25155 24656 24791 20262 21159 21061 21446 21200 21425 20953 21184 20839 27045 24373 24137 23631 23488 23061 21017 21302 21617 21400 21575 21440 21689 21670 22058 21751 23428 23543 23563 23447 23573 23500 23620 23498 23589 23541 23601 23484 23552 23310 23250 22972 23056 22985 22951 22708 22706 22609 22502 22344 22493 22672 22739 22912 22744 23120 23031 23445 23249 23523 23300 23495 23165 23301 23040 22938 22657 22822 22599 22749 22710 23444 22713 23056 22840 23098 22800 23217 22762 22983 22487 22867 22908 23427 22999 23261 22715 22675 22408 22976 22601 23021 22572 23148 22592 22787 22552 23127 22940 23418 22664 22690 22588 22864 22705 23029 22263 23048 22899 23213 22152 23004 22567 22842 22836 22762 22466 22990 22712 22789 22530 22705 22887 22907 22401 22903 22538 23365 22294 22904 22743 22963 22537 22579 22609 23264 22499 22745 22254 23014 
22356 22583 22960 22749 22441 22744 22476 22343 22299 22827 22683 22443 22371 22215 23136 22174 22789 22250 22580 22784 22419 22241 22893 22286 22343 22215 22913 22665 23180 22880 23224 22766 23296 22628 23189 22533 22970 22534 23168 22688 23057 22450 22421 21957 22858 22236 22857 21876 22498 22441 23191 22487 22569 21897 23015 22083 22945 22291 22757 21697 22639 22312 23196 22529 23086 22041 22625 21836 22765 22056 22684 22053 22756 22107 22807 22099 22870 22009 22865 21974 22341 21830 23057 22403 23288 22120 22510 22089 22700 22260 22861 22225 22237 22400 23340 22279 22489 22141 22929 21762 22381 22433 22907 21849 23044 21665 22909 22688 22451 22205 22553 21736 23096 22232 22794 22169 22377 22737 22503 22348 22839 22222 23000 22057 22672 21964 23155 21979 22708 21734 23124 21906 22799 21820 23279 22000 22746 22483 22520 22369 22080 22884 22509 21951 23114 21594 22850 21285 23424 22064 22226 23107 21849 22748 21895 23217 22279 22118 23067 21800 23127 21252 23536 22060 22204 23296 21712 22568 21927 22950 22494 21948 23434 21400 22542 22258 22083 22421 22098 22351 23034 21613 22778 22801 21845 22796 83 83 2529 4765 7041 7755 9554 43667 43685 41181 35480 31288 29808 27756 27436 26144 26547 25285 26017 24441 25442 24096 24956 23803 24180 23441 23815 23140 23887 23251 24051 23563 23854 23575 23681 23237 23595 22763 23191 22665 23251 22922 23754 22939 23809 22830 23608 22689 22867 21792 22805 22644 23440 23655 23319 23733 22905 22318 22420 22134 22260 22090 23024 23041 24005 22664 23527 22387 22214 21723 22663 23012 23193 23786 22657 22112 22293 22776 22815 23051 23013 22727 22547 22360 22579 22891 22823 23157 22593 22642 22180 22793 22392 23061 23004 22849 22453 22421 22409 22931 22505 23263 22268 22897 22210 22700 22120 23031 22671 23064 22564 22603 21994 23088 22439 23270 22048 22919 21889 22972 22674 22977 22500 22666 22067 22900 22439 23336 22476 22737 21824 22983 22620 22990 22559 23183 22006 22550 22249 23184 22317 23262 22036 22601 21952 23215 22685 22923 22112 22569 21975 22951 22467 23215 22181 22805 21917 22691 22087 22893 22585 22959 22727 22965 22768 22948 22695 22829 22672 22951 22816 22977 22889 23036 22989 22864 22529 22755 22083 22054 21431 21772 21746 22883 22163 23856 22707 23149 21750 121 83 2323 7239 9603 11856 12640 12615 13676 43424 43706 38642 32732 30476 28217 27316 25781 25696 25463 24648 24320 24430 24218 23965 23808 23617 23488 24229 23159 23464 23248 23555 22992 23013 22924 23875 23285 23639 22628 23034 22880 23287 22660 23157 22455 22785 22240 23010 22199 22876 22164 22919 22377 23315 22112 23287 22736 22634 22456 22771 22948 22842 22590 23289 22035 23338 22519 22857 22170 23479 22336 23015 21953 22748 22349 23051 22735 23021 22539 23168 21865 23015 22373 23513 22388 22819 22483 22842 22038 22848 22448 23095 22189 22905 22074 23410 22048 22903 22391 22727 22826 22949 21995 22887 22333 22568 22155 23240 23276 23783 22972 23098 22605 23148 22898 23021 23130 23617 23434 23885 23187 22961 21805 22082 22304 23136 22237 22165 21859 23488 23232 22082 22055 22883 21920 22563 23013 22400 22664 22413 22378 22797 22614 22454 22411 22156 23040 22197 22756 21933 23097 22035 22796 21974 23132 21968 22805 21961 23171 22325 22487 22679 22701 22128 23208 21998 22624 22569 22518 22144 23074 21928 22958 22577 22864 21709 23138 22251 22728 22043 22832 22580 22662 21879 22971 22152 23176 21920 22643 22308 23137 130 2809 8468 12536 13499 15700 15741 16677 16674 17660 43688 35425 30512 28438 26391 25856 24375 24970 23924 24709 23541 24512 23435 24245 23242 23787 22930 23594 22690 23040 22493 22965 22680 23140 22864 23137 22921 23069 22967 23131 23128 23149 23360 23013 23545 23021 23337 22679 22729 22722 22739 22767 22401 22547 22005 22093 21650 21847 21600 22233 22339 22469 22500 23254 22803 23787 22650 23597 22172 22488 22246 22246 22658 22478 23129 22515 23146 22564 22927 22464 22327 22166 22560 22744 22557 22791 23191 22220 22365 22311 22888 22564 23053 22208 22396 21963 22896 22579 22766 22284 22409 21976 23031 22306 23136 21927 22657 21777 22675 22289 22905 22356 22883 21737 22940 22228 23198 22064 22564 22224 22848 22416 22581 21869 22826 22144 23207 21912 22805 22337 22907 22072 22357 22314 23255 21989 22629 21920 22953 22487 22775 21671 22793 22139 23194 21824 22817 22556 22747 21899 22737 22307 23073 21942 22623 22574 22822 21921 22620 22364 22990 21973 22773 22604 22466 21968 22833 22237 22672 21612 22820 23198 22130 21653 22929 22373 22257 21728 23068 22761 21747 22608 23552 21518 22520 23504 22408 21534 23040 22345 22048 22005 7930 12805 15586 17172 17690 18091 18859 19147 19248 42993 31399 27817 26041 25001 24351 24273 23688 23718 23383 23245 23355 23280 22692 23473 22702 22799 23122 23424 22465 23507 22362 22836 22988 22704 22486 23159 22116 23016 22256 22999 22223 22573 22678 22705 22096 23343 21942 23015 22369 22572 22273 22639 21922 22936 21892 23182 22129 22573 22632 22729 22340 23169 21848 23020 22092 22529 22213 22797 22080 22764 21968 23330 22106 22850 22469 22393 22144 22906 22203 22837 21980 23251 21801 22798 22469 22320 22250 22669 22265 22710 22016 23156 21735 22892 21989 23032 22142 22769 22651 22437 22365 22749 22131 22677 22069 23385 21665 22872 22094 22865 22167 22008 23199 21891 22508 21766 22983 22497 22102 23552 21448 23010 22555 21835 22656 22675 21639 22960 22392 21870 22626 23493 21531 22455 23338 22299 21719 22689 22561 22039 22449 22453 22913 22185 22227 22599 22536 22501 22240 22424 22925 22117 22304 22280 22682 22317 22269 22325 23183 22368 22342 22455 22598 22289 22729 21907 22441 22235 23068 22199 23060 22189 22735 21781 22472 21656 22689 21785 22688 21819 22688 21602 22728 22001 23120 22189 22890 21848 22736 22448 22908 11151 17674 18311 20102 19927 20565 20294 20802 20832 21189 28183 26176 24030 24529 22852 23641 22555 23040 22876 23745 22177 23300 22357 23016 21841 23134 22664 23078 22017 22898 22359 22743 22032 22554 22469 23104 22199 22549 22311 22908 22117 22405 22364 23327 22409 22451 22199 22722 21927 21979 22688 23400 21635 22616 22464 21889 21978 23680 22096 22203 22276 21954 22597 23042 21671 22740 21475 23481 21783 22845 22234 22551 22540 22149 22186 22231 22956 22381 22373 22544 22346 22306 22208 22676 22391 22220 22872 22085 22477 22502 22544 22444 22203 22441 22700 21811 22663 22292 22281 22264 22588 22173 22624 22227 22725 21816 22689 22518 22520 22070 22996 22328 22348 21927 22699 22282 22510 21764 22901 22187 23162 22080 22513 21663 22528 22348 22745 22555 22759 22050 22551 21673 22535 21838 23068 21859 23259 22101 23209 22379 22758 22079 22705 22257 22616 21930 22513 21936 22704 21856 22610 21943 22667 21929 22792 22080 22586 21800 22496 22087 22865 22280 23040 22177 23172 22186 23041 21966 22883 22144 22628 21895 22404 22039 22487 21609 22563 22051 22700 22838 22982 23219 22464 22700 22237 21841 21975 21424 21713 21765 22806 22536 23657 22325 22900 21585 21768 21973 22887 23341 22408 22099 22116 21402 21920 22423 23303 22325 22259 22233 22232 23025 22189 22569 22023 22285 22577 22512 22644 22399 21912 22530 22503 22882 22057 22407 22442 22554 22288 22231 22273 22811 22105 22481 21782 22808 22608 22706 21949 22997 22005 22493 21905 22791 22538 22624 21896 23181 21921 22737 21687 22921 22372 22479 21980 23157 21443 22484 22240 22693 22148 22385 22155 23195 21805 22485 22287 22730 21959 22478 22191 22848 21753 22746 22358 22317 22168 23185 22096 22685 22355 22723 21643 23099 21938 22508 22367 22691 21774 22886 22034 22391 22133 22794 22071 22288 22175 22773 21728 22879 22304 22423 22224 22795 21740 22780 22139 22172 22355 22520 21464 22961 22777 21802 22497 22805 21643 22816 21744 22556 22259 21762 22642 22332 21414 23433 22152 21752 23225 22142 22108 23496 21353 22825 22223 22121 22455 21709 22682 22246 22255 22723 22341 22353 22831 21884 22517 22281 22528 22257 22277 22672 22022 22392 22475 22359 22464 22130 23047 21691 22773 22487 22510 22080 22368 22629 22360 22119 22533 22391 22563 22133 22911 21781 22685 21804 23033 21913 22900 21937 22890 21884 22672 22285 22528 22199 22441 22564 22609 22234 22668 22209 23045 22088 22932 22008 22775 21688 23389 21699 22861 21675 23148 21841 22880 21945 22892 22199 22894 22199 130 508 89 76 2924 4801 7654 8543 10265 10444 43670 43697 39438 33792 31108 29315 27735 26736 26285 25659 25427 24820 24848 24455 24320 24065 24176 116 155 5431 9687 12205 13239 14613 15266 16845 43611 43684 39092 34424 29767 28497 26802 27205 25284 25655 24707 25591 23881 24523 23475 25015 23187 23808 551 9961 12292 14864 15582 18144 17173 18445 17953 43672 37651 32484 28576 27949 25884 25876 24933 25301 24253 24608 23963 24466 23625 23946 23257 24001 250 11296 15012 17591 18128 19377 19307 19936 19981 20245 38590 30405 27544 26153 25527 24561 24327 24170 24188 23744 23566 23575 23488 23490 23025 23984 22688 12802 16935 19991 19623 21014 20709 21097 20840 21434 21154 29274 25463 25473 23856 23980 23523 23813 22699 24087 22816 23367 23085 23364 22392 23817 22676 23088 22899 23223 22333 23644 22548 22794 22580 23060 22382 22886 22464 23635 22201 23319 22228 22755 22152 22984 22386 23187 22237 23058 22343 22965 22428 22897 22543 22890 22472 22853 22150 22793 22172 22884 22299 23239 22372 23356 22548 23241 22401 22900 22273 22716 22622 23047 22626 23658 22752 23796 22571 23621 22189 22272 21583 22607 23385 22606 21825 22113 22757 23799 21914 22320 23337 22448 21604 23412 22217 22160 23504 21788 22797 22581 22467 22390 22456 22920 22423 22604 22445 22715 22551 22456 22819 22417 22496 22304 23019 22168 22517 22330 22791 22424 23223 22111 23074 22229 21891 22423 22830 22609 22664 22307 22371 22634 22429 22209 22615 22445 23062 21847 22893 21820 23183 22200 22743 22243 22545 22489 23079 21827 22944 22117 23259 22251 22619 22287 22492 22295 23145 21760 22595 22248 22421 22548 22692 21979 23133 21696 23162 22254 22549 22007 22756 22080 23226 21773 22359 22376 22624 22365 23172 21730 22889 22016 22597 22416 22637 21754 22941 21917 22826 22538 22491 22080 22971 21943 23072 22458 22358 22129 23047 21785 22883 22493 22372 22030 22800 21831 22982 22483 22467 22508 22951 21869 23098 22633 22161 22146 22938 21744 22385 23376 22631 21663 22464 22557 21771 22593 23599 21637 22245 22485 22423 21757 23640 22128 21992 22327 22764 21413 23376 23097 21760 22151 22870 21360 23026 23241 21920 22024 22295 22460 22065 22833 22643 22567 22428 22521 22397 22245 22392 22891 22413 22021 22267 22649 22295 22343 22633 23040 22180 22368 22094 22784 21955 22477 22562 23001 22092 22430 22203 22702 22008 22469 22499 22851 21744 23040 22117 22669 21917 22866 22578 22635 21708 23035 22180 22850 21909 22573 22418 23053 21650 22609 21938 22930 22086 22464 21897 23100 22500 22806 21863 22456 21301 22865 22176 22839 21623 22924 22412 23121 22207 22605 21640 22652 22032 22912 22124 22654 21709 22567 22215 23243 22424 23131 22085 22692 21740 22587 21965 22647 21902 22912 22000 22435 21627 22484 22126 23005 22541 23209 22551 22945 22117 22392 21720 22522 22442 22786 22209 22766 22182 22579 21725 22422 22007 22869 22428 23123 22599 22986 22065 22475 21731 21815 21853 22405 22156 22711 22326 23012 22580 22737 22040 22048 21532 21825 21497 21916 21744 22179 21921 23446 23318 23628 23285 23505 22835 23136 110 99 93 1978 5453 7852 9191 10624 11037 43680 43672 43690 36127 32276 29824 21 2738 8825 12873 14503 15779 16532 17213 17497 43624 43698 41072 34472 31265 29184 147 9097 14282 16321 17741 18169 19151 19000 19877 19555 43693 35765 31861 29040 28202 2227 13767 17303 19475 19851 21095 20618 21206 20824 21591 39744 31744 28128 27361 25700 25651 16619 20097 20327 21449 20903 21819 21156 22253 21449 34033 27446 26413 24832 25016 24083 24567 23671 24224 23567 24165 23286 24035 23300 24068 23040 23821 23040 23740 22753 23637 22770 23520 22448 23291 22628 23129 22445 23089 22480 23118 22705 23540 22661 23781 22886 23750 22830 23688 22707 23246 22190 22860 22036 22925 22339 23204 22349 22902 22478 23155 22615 23152 22552 22839 22158 22842 22572 23433 22836 23221 22462 22816 21901 22690 22416 22875 22414 23008 22272 22705 22158 23088 22871 23658 22516 22257 22001 22764 22731 22610 21569 22808 23605 23143 21514 22603 22784 21840 23476 21867 22321 22416 23235 21840 22695 22054 22494 22817 21988 22193 22981 23783 22297 21888 22313 23010 22842 21902 21931 23275 22375 22804 21449 21918 
