# Supplementary material for: An Active Feature Selection Strategy for DWT in Artificial Taste
Source: Hindawi journal article supplement (doi:10.1155/2018/9709505), 2018-01-01
Supplement: f1 [file 9709505.f1.zip › maofengTea-low-1.txt]

43604 43497 43495 43494 53 8483 15727 19519 19639 21408 21140 22168 21713 22389 21846 22375 22181 22908 21781 22976 21922 22612 22556 22993 21998 23136 22320 22740 22178 23297 22686 22964 22020 23274 22392 22905 22210 23054 22788 23480 22319 22693 22516 23268 22564 22795 22263 22918 22451 23616 22768 23063 22232 22892 22616 23326 22585 23061 22296 22785 22259 22923 22849 23478 23045 23399 22676 22836 22233 22937 22784 23381 22780 23128 22566 22939 22479 22930 22285 22613 22425 23168 23212 24042 23531 23925 23110 22712 21991 21975 22004 23045 23221 23580 23110 22890 22508 22464 22076 22130 22264 23189 23542 24097 23872 23688 22983 22152 21797 22375 22687 23470 23384 23049 23005 22640 22365 22549 22792 22464 23114 23190 23454 22981 23042 22496 22658 22771 23218 22838 23159 22662 23009 22419 23079 23049 23522 22816 22917 22368 23248 22898 23185 22536 23350 22217 23068 22773 23475 23059 23265 22385 22912 22610 23398 22680 23175 22454 22983 22599 23378 22784 23636 22724 23041 22208 23166 22832 23334 22641 23127 22455 23050 22232 23380 22893 23559 22752 22974 22392 23419 22705 23244 22437 9327 14929 17772 18244 19143 18392 19805 19394 20183 19477 30412 25637 25320 24376 24564 23500 23639 22849 23448 23287 23543 22920 23319 22597 23594 23224 23657 22751 23040 22978 23492 22890 23552 22584 22912 22738 23732 23316 23571 22753 22543 22659 23502 23145 22919 22422 22301 22513 23852 23893 23434 22317 22024 22673 23692 23334 22893 22390 22283 22869 24072 23557 22469 21940 23018 23448 22951 22376 22346 22372 23616 23640 23208 23232 22493 22848 22801 23238 22745 23079 22554 23016 23209 23388 23156 22992 22484 22974 22951 23251 22675 22990 22400 23179 22984 23588 22827 22983 22442 23373 22805 23248 22565 22977 22557 23502 23023 23136 22535 23158 22872 23243 22614 23207 22311 23261 22833 23704 22757 23136 22330 23337 22757 23187 22657 22963 22521 23400 23018 23499 22325 23047 22593 23552 22583 23141 22512 22900 22528 23557 22998 23368 22316 22984 22771 23393 22684 23146 22336 22959 22625 23677 22807 23114 22373 22972 22722 23296 22678 23126 22542 22800 22600 23310 23063 23540 22755 23010 22368 23188 22832 23265 22764 23022 22579 23095 22292 23005 23120 23746 23224 22570 22103 22912 23081 23447 22503 22624 22199 22205 23046 24119 17856 19058 19024 20582 21257 21369 20736 20521 20444 32134 26544 25650 24588 23500 22436 23031 23698 23799 22995 22993 23019 22638 23320 23306 23619 23081 23015 22631 23150 23077 23045 22714 22740 22963 23579 22994 22920 22572 23202 23040 23166 22752 23036 22554 23031 23168 23481 22912 23089 22327 23207 22838 23303 22701 23016 22464 22835 22592 23554 23052 23412 22375 22897 22643 23425 22549 23433 22229 23311 22970 23665 22797 23022 22577 23364 22793 23092 22428 23021 22551 23673 22876 23161 22328 23013 22784 23394 22596 22959 22386 23568 23052 23335 22412 23107 22819 23215 22519 23047 22702 23527 23009 23431 22587 22934 22373 23005 22785 23409 22842 23224 22760 23176 22701 23205 22632 23046 22615 23049 22568 23462 22679 22512 22703 23040 22584 23114 22837 23367 23044 23413 22796 22442 21884 22581 22950 23669 23776 24072 23813 23669 22956 22766 22243 22444 22058 22169 21991 22456 22116 22643 22562 22752 22967 23429 23339 23410 22748 22464 21910 22005 22364 23430 23427 23221 23057 22400 23155 22672 23260 22832 22792 22634 23282 23236 22711 22725 23200 22808 22784 23133 23383 22412 23036 22774 23270 22542 23004 23061 23461 22737 16850 20020 21308 21340 21896 21142 21857 21498 22405 22176 26378 23720 23577 22855 23409 22825 23520 23023 23477 22520 23132 22455 23190 22504 23313 22907 23535 22917 23536 23013 23676 23093 23637 23063 23580 22953 23619 22864 23694 23073 23671 22957 23720 22997 23576 22953 23641 22952 23531 22931 23345 22744 23165 22332 23149 22396 22997 22197 22941 22218 23026 22343 23008 22504 23258 22894 23389 22859 23276 22729 23160 22588 23089 22706 22858 22576 22948 22439 22919 22452 23179 23047 23540 23005 23538 23028 23392 22695 23110 22440 22677 22167 22352 22077 22324 22136 22205 22344 22694 23002 23256 23255 23578 23370 23488 23285 23212 22737 22748 22528 22681 22633 22362 22080 22401 22535 23286 23570 24074 23984 23872 23766 23639 23136 22537 22162 22016 22145 22642 23014 23000 23228 22723 23077 22580 22461 22775 22904 22549 22752 22501 23062 23058 23504 23173 23324 22798 22924 22484 22747 22514 23193 22756 23360 22952 23265 22752 22962 22619 23084 22640 22860 22388 22817 22397 22993 22668 23421 22917 23548 23003 23418 22792 23128 22482 22974 22361 22936 22553 22924 22497 23238 22710 23390 22580 23229 22484 22710 22616 22840 22349 23106 20441 22091 22062 22824 22231 22830 22039 22476 21576 26662 23253 23811 23016 23567 22711 23223 22624 23255 22425 22864 22487 23233 22967 23587 23021 23484 22528 23011 22288 22950 22467 23341 22803 23444 22516 23149 22380 23025 22240 23197 22984 23513 23041 23253 22451 22882 22432 23005 22684 23267 22892 23283 22663 23015 22617 22901 22398 22851 22503 23259 23111 23445 22922 23089 22479 22864 22511 23179 22896 23282 22616 23020 22180 22332 22182 22944 23566 24054 23674 23495 22296 22119 22036 23105 23356 23360 22741 22826 22528 22576 21987 22416 22993 24000 23697 23255 22119 22073 22506 23337 23367 23138 22480 22704 22464 22182 22626 23952 23920 23402 22151 22024 22452 23413 23129 22709 22937 22561 22843 22733 23303 23115 23381 22689 22745 22720 23276 22955 22904 22715 22798 22533 22942 22745 23314 23173 23372 22732 22780 22615 23160 22850 22976 22984 22793 22474 23188 23160 23431 22881 22953 22374 23047 22784 23239 22631 22964 22304 23101 23000 23456 22770 22875 22440 23243 22781 23124 22442 22774 22551 23414 22904 23340 22358 23028 22706 23399 22504 23093 22307 23000 22562 23553 22944 23485 22527 22848 22401 23355 22774 23139 20800 22493 21922 22796 22457 23256 22580 22877 21990 22786 23290 23656 22579 23194 22379 23018 22540 23555 23003 23304 22569 22944 22307 23192 22761 23408 22586 22874 22251 23078 23014 23494 22609 23109 22268 23065 22798 23164 22453 23023 22359 23545 22834 23440 22312 22945 22740 23255 22692 22952 22610 22796 22694 23426 23066 23317 22490 22802 22516 23208 22816 23087 22100 22939 22441 23282 22953 23500 22920 23040 22384 22935 22804 23342 22671 23177 22552 23021 22663 22821 22279 22773 22674 23261 23001 23705 23448 23604 23257 23370 22740 22544 21984 22119 21836 22144 21841 21957 21857 22272 22328 22496 22771 23268 23123 23399 23446 23496 23387 23572 23352 23388 23392 23570 23369 23289 22865 22945 22535 22648 22589 22692 22483 22636 22564 22962 23111 23505 22615 22320 23676 23724 22027 22605 23408 21999 23469 23082 22394 23491 22215 23432 22683 22977 23131 22416 23173 22748 22789 22914 23287 22460 23034 23066 23091 22678 22813 22663 23020 22880 23376 22762 23075 22570 22753 22762 23108 23008 23133 22912 22971 22577 22853 22286 22743 22584 22997 22659 23270 22677 23451 22779 23449 22720 22997 22570 22647 22458 23092 22656 22991 23106 23218 22976 23271 22517 22945 22168 22785 22247 23409 22577 23524 22759 23200 22660 22781 22446 23002 22528 23122 22784 23272 23013 23330 22715 23174 22312 22824 22424 22993 22445 23370 22545 23521 22772 23408 22528 22993 22187 22887 22204 23079 22542 23105 22657 23062 22904 23354 23021 23316 22976 23232 22972 23316 23046 23351 22984 23140 22928 23144 22561 23232 22266 22867 22528 23348 22606 23596 22318 22921 22279 23104 22692 23304 22755 22972 22352 23641 22432 22800 22529 23380 22726 22945 22665 23599 22311 22972 23040 22917 22419 23519 22456 22912 22922 23168 22407 23502 22320 23444 22599 23013 22624 22877 22466 23314 22209 23536 22429 23241 22720 22992 22537 22806 22962 22765 22821 22967 22870 23163 22810 23002 22911 22873 22715 22743 23022 22790 22657 22874 22953 23055 22492 23125 22898 23079 22673 23337 22312 23540 22311 22917 22816 22794 22992 23014 22508 23194 22432 23531 22444 22908 22913 22743 22921 23417 22197 22860 22921 22436 23616 22596 22624 23493 21847 23528 23336 22186 22416 23536 21832 23232 23629 22317 22675 23480 21775 22949 23804 22490 22321 22913 23125 21904 22942 24088 22592 22498 22523 23527 22410 22315 23584 23692 22145 22632 22692 23492 22561 22051 23075 24008 22942 22218 22424 23346 22918 21997 22561 23761 23616 22613 22533 23044 23056 22976 22971 22346 22949 14676 18322 18873 19472 19263 19767 19819 20345 20231 42066 27648 25028 23784 23778 23653 23821 23596 23596 22757 23128 22796 23215 22840 23235 22930 23438 22937 18208 19770 20965 20825 21259 21079 21271 21162 21641 32213 26215 24478 24397 23693 24033 23360 23673 22903 23296 22609 23049 22600 23056 22415 23292 22528 10275 19526 21347 21196 22001 21624 22099 21632 22235 21672 28231 24069 23991 23072 23520 22862 23520 22865 23525 22760 23496 22863 23408 22753 23360 22756 23367 17414 21696 21585 22310 21879 22726 22184 22628 21783 22487 24399 23700 22820 23314 22579 23319 22820 23403 23003 23738 23088 23689 23060 23523 22682 23191 22359 21188 21652 22671 22178 22964 22581 23060 22568 23033 22360 23876 22806 23306 22725 23232 22308 22952 22277 23216 22378 23159 22592 23541 22923 23677 22897 23457 22593 22999 22385 22938 22549 22976 22652 23220 22780 23420 22757 23200 22679 23058 22869 23233 22483 22945 22398 22829 22622 23212 22993 23577 23001 23308 22649 22976 22392 22853 22472 23067 22866 23287 22867 23110 22599 23072 22616 23009 22395 22765 22702 23368 23140 23591 23062 23265 22391 22431 22361 23137 23101 23253 22551 22329 22232 22337 22413 22720 23216 23959 23853 23514 22661 22129 21843 22816 23303 23442 22547 21995 22209 22245 22892 23719 23861 23936 22627 22039 21900 22874 23405 23296 22678 22941 22182 22121 22226 23520 23797 23862 23585 23288 22476 22087 21801 22604 23217 23431 22967 22658 22600 22168 22393 23280 23674 23397 23157 22895 22808 22411 23069 22872 23207 22610 22903 22361 23012 22976 23416 23112 23264 22868 23016 22900 23061 23084 23254 23184 23352 22936 22824 22392 22720 22691 23107 22948 22778 22460 23336 23077 23061 22359 23393 22665 23245 22500 22951 22977 23350 22319 22896 22912 22736 23072 22751 22773 22786 22805 23178 22554 22807 22568 23302 22784 23498 22889 23529 22784 23584 22797 23367 22656 23029 22288 23165 22882 23369 22418 22923 22533 23344 22248 23151 22641 22858 22586 23344 22253 23098 22912 23101 22309 23412 22641 23127 22118 23136 22945 23393 22226 22912 22414 23607 22749 23013 22231 23062 22830 23256 22756 23033 22431 23040 22488 23396 22500 23627 22695 23582 22617 23465 22648 23433 22518 23115 22492 23269 22521 23234 22733 23511 22784 23572 22653 23552 22416 23246 22734 22938 22492 22877 22336 23084 22745 23435 22983 23181 22537 23259 22200 23176 22678 23425 21863 22848 22464 23392 22805 22957 22237 23190 22752 23319 22257 22965 22917 22932 22345 23061 22768 23279 22294 23339 23093 23168 22540 23517 22505 22849 22997 22984 22414 23473 22567 22850 22995 22981 22439 23513 22733 22892 23096 23175 22752 23392 22512 23250 22762 22796 22784 23080 22436 23148 22315 23177 22647 22521 22940 22928 22256 23834 22287 22919 23591 22405 23094 23425 21933 23407 22080 23323 22439 22248 23572 22353 22745 23481 21986 23011 21643 23997 22199 23258 22989 22684 22436 22205 23737 22107 23328 22548 22921 22702 22585 23490 22289 22539 22369 23754 22075 23052 22049 23927 22268 23392 21849 23911 22103 23284 21797 24027 21895 22960 22333 23434 22502 22658 23160 22565 6423 16498 18699 19075 19934 20048 19977 20179 20192 20551 31137 26045 24895 23496 24054 23302 18006 20464 20792 21359 21783 21227 21793 21542 21888 32888 25816 24250 23921 23354 24036 17506 21095 21628 21873 22128 22265 21829 22534 21765 22355 25587 23977 23320 23845 22710 17828 21516 22135 22084 22560 21928 23088 22216 22720 22389 25361 23278 24035 22887 23475 22896 22120 22406 23200 22000 22906 22565 23021 22016 23378 24694 23392 22784 23585 22528 23290 23063 23317 22982 23469 22547 23086 22961 23447 22349 23149 22903 23068 22448 23461 22989 22889 22599 23232 22807 22976 22516 23637 22740 22932 22434 23444 22717 22898 22584 23639 22781 22871 22599 23168 22704 23168 22332 23133 22874 23377 22394 23169 22479 23223 22808 22872 22404 23461 23051 23412 22176 22966 22471 23472 22555 23005 22311 23426 22901 23392 22297 23212 22322 23239 22612 22820 22432 23367 23086 23439 22389 22785 22402 22997 22861 23252 22540 22864 22817 23552 22993 22951 22324 23143 22529 23208 22859 23120 22441 22999 22856 23504 22924 23049 22337 22891 22935 23008 22874 23344 22558 22653 22524 23367 23162 23309 22180 22771 
22586 21768 22673 21755 22776 21918 22309 22203 22131 21760 22342 21938 22573 21574 22676 21454 22917 21474 22400 21808 22427 22257 22117 21843 22402 21740 22790 21510 22451 21613 22752 21840 22428 21892 22152 22173 22225 21065 20753 21987 22637 22112 20667 20647 21834 21745 21808 21465 21847 21261 22055 22055 22315 21653 21499 21580 22053 21815 22027 21639 21875 21492 21696 21412 21975 21921 22515 22105 22223 21692 21863 21450 21817 21584 22359 21775 22299 21614 22062 21461 22199 21352 21934 21480 22597 21799 22668 22032 22581 21793 22258 21313 22020 21435 22302 21878 22453 21740 22202 21572 22059 21335 21928 21413 22456 21797 22743 22064 22483 21666 22125 21313 22184 21853 22256 21949 22458 21642 22323 21512 22169 21291 22402 21934 22918 22008 22549 21505 22109 21687 22391 21975 22363 21694 22204 21489 22272 22115 22711 21965 22040 21459 22416 21860 22357 21767 22099 21417 21931 21728 22768 22486 22606 21415 21576 21807 22633 22079 22000 21336 21573 21008 22242 22880 23412 22577 21687 21021 21582 22184 22595 21881 21979 21508 21370 21067 22266 22928 23152 22057 21344 21193 22582 22541 50 3853 6060 8605 9635 10888 10889 11679 12371 12896 33158 28860 26307 25121 24218 24328 23838 23495 22577 22925 22475 22992 22293 21965 21916 22336 22496 22875 22234 22224 21856 22688 22102 22586 22343 22174 21784 22687 22231 22950 22105 22243 21523 22549 22033 22599 21678 22521 21434 22548 22207 22867 21933 22113 21687 22260 22073 22547 21708 22277 21557 22929 22145 22677 21381 22295 21984 22545 21834 22336 21628 22275 22009 22967 22163 22425 21506 22413 21988 22504 21712 22429 21627 22742 21967 22869 22147 22290 21575 22310 22072 22421 21783 22283 21607 22314 22203 22702 21902 22152 21687 22539 22129 22276 21687 22037 22039 22850 22219 22007 21397 22221 22439 22384 21772 21865 21047 22205 22864 23327 22184 21368 21195 22605 22181 21968 21475 21356 21724 23056 23064 22684 21301 21464 22059 22669 21985 21686 21556 21385 22176 23112 22744 22000 22058 21685 22227 22120 22229 21811 22004 21778 22482 22541 22580 22027 22021 21830 22346 22245 22320 21834 22171 21536 22145 22039 22672 22355 22601 21760 22127 21520 22359 22000 22500 21860 22260 21598 22112 21929 22773 22192 22509 21677 22147 21741 22697 21888 22391 21749 22190 61 9509 12281 14195 14021 15195 15437 16547 15831 16749 34644 28934 25812 25345 23943 24005 22497 22930 22344 23096 22437 22551 22025 22407 21738 22997 22170 23154 22081 22321 21747 22800 21901 22839 21606 22308 22268 22854 22029 22273 21733 22439 22071 22605 21804 22279 21527 22465 22307 22862 22134 22167 21652 22215 22125 22611 22177 22346 21776 21593 21701 23171 22891 22441 21138 21795 22359 22592 21705 21711 21270 22173 22761 23413 21882 21330 21557 22805 22025 22251 21338 21529 22368 23353 23040 22347 21109 21863 22465 22235 21508 21605 22090 22325 22688 21809 22135 22169 22332 21506 22014 21639 22207 22373 22703 22364 22549 21888 22068 21655 22167 21862 22542 21939 22400 21973 22498 22096 22400 22180 22510 21975 22598 21993 22649 22034 22336 21968 22340 21632 22167 21541 22330 21845 22793 22305 22797 22074 22556 21639 22215 21390 22201 21857 22154 21624 22444 21813 22327 21689 22545 21933 22621 21963 22483 21564 22272 21485 22231 21869 22725 22189 22983 21999 22193 21612 22140 21797 22762 21922 22413 21565 22651 22196 22638 21525 22467 21966 22223 21848 22824 21852 22247 21786 22620 21888 21994 22112 22784 21967 22027 21856 10913 14999 16864 16935 18091 18254 19276 18743 19055 18215 28609 25383 24337 23429 23578 22865 22416 21493 21991 22304 22912 23168 23557 23344 23326 22701 22592 22397 22389 21833 21985 21636 21748 21321 21457 21208 21273 21116 21414 21255 21470 21249 21527 21361 21593 21544 21779 22022 22272 22578 22349 22723 22275 22784 22454 22701 22422 22629 22379 22585 22205 22403 22095 22263 21779 21994 21685 22188 21744 22341 21982 22581 22149 22394 21925 22439 21917 22294 21876 22372 21605 22138 21526 22254 21831 22510 22250 22937 22198 22750 22176 22809 22187 22612 21904 22480 21816 22325 21585 22208 21576 22186 21550 22358 21586 22330 21952 22534 22035 22664 22043 22420 21767 22400 21692 22343 21445 22153 21512 22480 22022 22513 22112 22813 22221 22864 22144 22509 21668 21998 21685 22372 21653 22592 22036 22676 21699 22603 21709 22361 21649 22243 21480 22260 21703 22713 22183 22865 22179 22665 21977 22184 21616 22102 21584 22314 21879 22554 22032 22567 21888 22295 21792 22196 21945 22301 21744 22116 21450 22185 21874 22528 22244 22960 22827 23187 22772 22631 21920 22439 21712 21540 21031 21406 21630 22369 22528 22657 22302 22213 22018 10773 16414 18218 18574 19371 19573 20800 21061 21736 21429 29273 24812 22983 21852 22133 22516 23107 22743 22752 22105 22053 21157 21696 21916 21888 22440 22345 22855 22272 22635 22208 22305 21775 21985 22005 22429 22229 22198 22030 22073 21906 22007 21793 22490 22400 22720 22369 22648 21861 22214 21559 22243 21848 22457 22039 22595 21920 22316 22285 22450 21586 22202 21874 22734 22336 22818 22077 22276 21492 22216 21944 22556 21941 22377 21890 22583 21577 22160 21741 22591 22107 22941 21841 22472 21378 22246 21665 22727 22077 22592 21907 22304 21598 22135 21569 22598 22284 22869 21844 22261 21484 22491 21856 22624 21946 22488 21770 22196 21651 22531 22161 22851 22043 22237 21607 22451 22105 22570 21979 22373 21607 22220 21629 22932 22096 22761 21554 22249 21637 22753 21847 22599 21863 22312 21716 22016 21832 22732 22320 22631 21789 22099 21739 22589 22036 22261 21809 22172 21543 22523 22237 22738 21949 22350 21463 22323 22176 22411 21873 22126 21632 22562 22317 22773 21957 22069 21798 22542 22087 22151 21803 21444 21776 23058 22885 22403 21234 21568 22440 22791 22208 21976 21543 21265 21435 22829 23130 23019 22033 21434 21159 22277 19131 20528 20361 20729 20436 20809 21556 22644 22259 27485 22864 22609 22692 22875 22149 21370 21749 21388 21957 23183 23175 23360 22752 21773 21472 21815 22442 22204 22263 21760 22030 22095 22800 22384 22518 21849 21976 22263 22327 21968 22299 21600 22112 22460 22709 22167 22063 21803 22491 22193 22313 21849 22215 21659 22347 22253 22716 22246 22280 21704 22282 22139 22405 21883 22521 21718 22025 21675 22643 22259 22598 21833 22195 21564 22439 22021 22543 22093 22499 21815 22275 21645 22061 21479 22088 21660 22529 22008 22784 22186 22812 22187 22763 22023 22737 21995 22674 22044 22533 21662 22416 21611 22264 21541 22256 21457 22117 21644 22153 21600 22279 21775 22132 21616 22215 21912 22504 21936 22702 21932 22689 21952 22659 21968 22730 21938 22400 21447 22472 22112 22552 21565 22343 21992 22279 22049 22663 21843 22477 21634 22864 21543 22514 21644 22478 21893 22203 22026 22394 21548 22656 21788 22695 21607 22251 22112 22597 22006 22489 21554 22090 21779 22508 22027 22775 21656 22503 21731 22350 22202 22614 21846 22695 21879 22779 22056 22603 21924 22251 21617 22046 21681 22191 21948 22304 22233 22554 22246 22528 21943 22169 21638 22046 21608 22420 21805 22827 21972 22745 22007 22140 21616 22103 21770 22234 22043 22310 22320 22663 21992 22372 21642 21933 21575 22209 22129 22959 22032 23347 22272 22896 21872 21791 21389 21604 21619 21215 22468 22210 23113 22733 22884 22749 21873 22080 21598 21740 21120 21272 21347 21290 21497 21276 21333 21239 21159 21227 21179 21643 21272 21832 22153 22748 23015 22357 22705 21697 21095 21387 22025 23120 22212 23032 21633 21265 22039 22733 22467 21430 21890 23252 21776 21239 21989 22612 22233 21217 22465 22314 22124 22114 22616 21800 22390 22359 22135 22105 22567 21625 22385 21736 22491 21935 22033 22423 22097 21820 22618 21735 22439 21892 22351 21987 22150 22370 22008 22072 21928 22321 22117 22146 22037 22360 22076 21996 22089 22228 22216 21719 22432 22045 22471 21831 22422 22097 22361 22016 22503 21707 22729 21636 22312 22002 22144 22189 22356 21707 22387 21718 22802 21684 22261 22071 22085 22018 22624 21590 22348 21943 22112 22216 22184 21923 22640 21530 22792 22011 22130 21739 22651 21544 22731 22075 22179 21614 22773 21483 22656 22146 22125 21494 22525 21791 22073 22099 22727 21501 22377 21843 22528 21633 22444 22163 22597 21458 22392 21810 22633 21431 22358 22187 22729 21443 22369 21858 22640 21643 22279 21954 22869 21783 22039 21803 22372 22165 22380 21652 22328 22159 22955 4571 9651 10734 13090 12692 14240 14155 15084 14412 40835 30835 27931 25633 25061 23583 23520 22391 22820 22296 22721 22221 22832 22317 22791 22079 22317 57 10036 13335 15415 15988 17186 17090 17874 17870 18588 35809 29484 25995 24748 23361 23160 22454 22712 22219 22775 22165 22585 22054 22487 21879 22656 22245 7071 14441 17399 18091 19056 19148 19746 19527 20135 19879 31542 26448 24936 23787 23439 22628 22691 22199 22138 21738 21960 21672 22077 21834 22182 21888 22331 13433 18065 19593 20527 20532 20969 20577 20759 20493 20599 26566 24584 22983 22705 22112 22333 21880 21838 21412 21480 21447 21720 22065 22924 23076 23403 23134 19322 20380 20860 21207 20665 21094 21045 21488 21184 27888 24039 23343 22599 22767 22220 22373 22040 22713 21987 22244 21945 22180 21799 21904 21911 22282 22423 22740 22536 22491 22263 22343 21960 22163 21707 22025 21760 22183 22023 22516 22144 22596 21983 22304 21933 22292 21792 22039 21696 22007 21774 22415 22227 22705 22358 22634 21959 22377 21644 22130 21728 22166 21820 22480 22027 22434 21864 22236 21646 22144 21579 22091 21921 22716 22247 22693 21987 22235 21559 22222 21911 22647 21929 22336 21736 22465 21711 22156 21419 22513 22073 22906 22008 22384 21559 22146 21778 22601 21824 22352 21826 22229 21467 22208 22073 22859 22202 22550 21411 22192 21792 22515 21936 22520 21713 22288 21354 22297 21976 22737 22099 22916 22080 22618 21605 22151 21555 22480 22021 22465 21648 22131 21580 22216 21891 22806 22336 22823 21915 22229 21529 22422 21957 22501 21599 22515 21392 22393 21674 22758 22032 22807 22121 22793 21938 22505 21530 22096 21688 22620 21738 22514 22031 22225 21589 22604 22266 22483 21515 22158 21843 22469 21991 21984 21941 22865 22033 22070 21749 22472 21527 22721 21456 22311 21562 22736 21639 22246 22096 22291 21997 22183 21581 22215 21643 22259 21592 22135 21674 21949 21965 22288 22292 22455 21282 22119 21906 22792 21295 22087 22382 21399 21802 22899 21063 22155 22759 21591 21446 23181 22448 21591 20981 21888 22965 22142 21192 22242 22147 23090 21643 21580 22018 22020 22952 22210 21191 21479 20965 23081 22518 22632 22021 21760 21111 21277 21126 21577 21312 21806 21691 21909 22451 21946 22464 21959 22163 22217 21888 21627 21290 21584 21075 21351 21763 22124 22301 22501 22432 22422 22235 22195 22144 21640 21978 21761 22492 21981 22689 21819 21910 21713 22311 22464 21980 21858 22034 22231 22588 22428 21830 22049 22327 22291 22071 21923 22720 21850 21948 22144 22374 21655 21951 22168 22528 21429 22453 22236 21973 21977 22600 21715 22164 22293 22161 22010 22552 21579 22554 22040 21993 22016 22520 21709 22521 21640 22393 21783 22092 22150 22169 21580 22729 21640 22464 22304 22281 21801 22641 21394 22528 21832 22230 21927 22168 21856 22376 21506 22863 21638 22602 22057 22256 21861 22416 21839 22385 21590 22829 21521 22585 21574 22647 21799 22426 21945 22173 21879 22039 22127 22395 21943 22404 21873 22337 21899 22800 21621 22348 21597 22646 21424 22604 21479 22863 21367 22405 21571 22794 21560 22358 21708 22483 21875 22512 22048 22118 22266 69 7951 11716 12796 14604 13784 15329 14746 16249 15254 35211 28904 26421 24782 24346 22846 11211 14083 16985 17160 17698 17797 18391 18048 18979 35512 29429 25755 24879 23927 23248 11749 16791 17600 19636 18952 19777 19648 19793 19992 37548 27840 25674 24164 23402 23213 13955 17691 19745 19820 20760 20821 20702 19976 21291 20514 27471 24805 23355 22901 23265 16362 20570 20849 20704 21076 21963 20760 21494 22343 21131 24844 23700 23117 21820 22778 23517 21404 21499 22656 21520 22200 23445 21683 21777 22085 22672 21149 22576 23249 22329 21206 21896 22405 22116 21165 22944 22992 21553 21520 22228 22432 21448 21509 23173 22861 21624 21396 21982 22456 22397 21198 21809 23094 23331 21793 21623 21825 22259 22452 21800 22021 22165 22778 22032 22082 21736 22200 22006 22272 21760 21993 22229 22544 22229 21977 21881 22087 22160 22359 22045 22016 22272 22634 22194 22068 21607 22301 21809 22546 21932 22170 21651 22391 22177 22600 21745 22007 21984 22134 22060 22481 21869 22034 21568 22491 22245 22656 21591 21992 21564 22304 21981 22473 21943 22257 21376 22464 22034 22766 22160 22103 21586 22248 21952 
21312 21464 22135 21170 22387 20925 22896 20872 21747 21472 21899 22205 21349 22330 20934 22708 21321 21425 22085 21020 22956 20689 21940 21670 21271 22696 21113 21795 21459 21749 22384 21217 22566 20800 22472 21468 21921 22131 21136 22890 21100 21344 22127 20943 22962 20979 21522 21864 21287 22790 21095 21984 21583 21671 22083 21479 21672 21926 21575 22224 21484 21919 21341 22035 21720 21606 21924 21383 22091 21532 21588 22021 21345 22267 21560 21467 21905 21669 22117 21655 21926 21413 21612 21143 21060 20804 21066 21508 22475 22699 22944 22471 21895 21079 20810 20692 21488 21671 22390 22150 21879 21340 21881 21104 21052 20844 21664 22249 22881 22717 22487 21607 20952 21425 21376 21515 21617 21993 21894 21874 21472 21533 21451 21520 21748 22137 22033 22101 21641 21412 21335 21637 21741 22087 21521 22193 21281 21713 21803 22256 21825 21714 21301 21734 21748 22016 21497 21708 21654 21628 21421 22169 21905 22222 21380 21546 21389 22079 21632 22016 21427 21880 21344 21664 21696 22372 21901 21888 21280 21681 21461 22119 21712 21985 21461 21805 21248 21930 21820 22432 21699 21619 21353 21954 15136 17728 17920 18861 18839 19879 19637 19786 19047 34263 25361 23964 22407 22430 21683 22008 22096 22541 22051 22000 21291 21923 21888 22007 21565 21808 21255 22242 21963 22254 21414 21607 21600 22185 21709 21872 21480 21488 20994 21960 22507 22592 21582 21046 21053 22347 22204 21792 20903 21235 21072 22340 22749 22708 21686 20952 20791 22153 22068 21625 21190 21143 22099 22985 22272 21120 20807 21866 22272 21867 20732 21497 21495 21648 22237 21966 22016 21331 21591 21881 21879 21717 21765 21441 21417 21915 22140 21984 21875 21342 21631 21843 22024 21554 21625 21497 21680 21912 22241 21721 21721 21287 21921 21767 21894 21634 21516 21755 22249 21741 21856 21192 21986 21760 22117 21481 22025 21235 21770 21747 22370 21749 21678 21410 22115 21781 21936 21568 21815 21292 22197 21975 22114 21377 21604 21492 22220 21640 21998 21338 21737 21458 22216 22018 22042 21429 21632 21335 22262 21613 21824 21511 21754 21665 22303 21921 22073 21439 21593 21462 22156 21794 21951 21477 21918 21321 21849 21825 22400 21953 22050 21572 21702 21235 21977 21806 22099 21563 21735 21210 21377 22107 22881 22414 21999 20793 21204 21729 22435 21893 21511 12488 17913 19611 21271 20727 20000 19447 20707 21229 21294 26172 23322 22007 21720 22026 23167 22696 21982 20958 20875 21781 22001 21964 21603 21705 21371 21543 22039 22281 21929 21458 21529 22084 21770 21559 21625 21722 21960 22307 21805 21728 21345 21640 21811 21998 21569 21595 21379 21752 21813 22224 21971 21995 21394 21631 21370 22044 21798 21914 21856 21649 21434 22226 22005 22102 21276 21748 21697 22089 21441 21750 21414 21735 21913 22252 21612 21674 21434 22177 21597 21976 21569 21656 21763 22319 21894 21992 21192 21802 21829 21984 21498 21576 21528 22382 21690 21846 21248 22105 21639 21868 21936 21880 21320 22017 21869 22329 21892 22144 21585 21767 21299 21623 21248 21614 21334 21674 21271 21664 21468 21944 21568 21824 21509 21828 21383 21680 21292 21614 21536 22112 22231 22803 22577 22469 21281 21223 20862 21524 21239 20917 21209 21795 21957 22326 22103 22439 22251 22499 22264 21975 21112 21049 20704 21012 21351 21993 22311 22801 22785 22821 22161 21667 21248 21686 21687 21776 22018 21585 21463 21624 22147 22128 21716 21495 21809 21937 21520 21732 22279 21492 21744 21626 22065 21478 21752 21960 22293 21537 21579 21543 21872 18698 20088 20232 21236 21286 21414 21149 21049 20786 28696 23400 22874 22257 22252 21588 21760 21488 22147 21911 22372 22056 22215 21703 21943 21383 21671 21287 21625 21321 21677 21400 21760 21497 21683 21437 21897 21420 21874 21199 21848 21458 21821 21506 21746 21377 21963 21388 21687 21324 21639 21324 21793 21497 22041 21646 22186 21659 22363 21868 22288 21992 22341 21974 22307 21799 22106 21685 21683 21372 21604 21313 21672 21399 22139 21773 22056 21829 22048 21697 22020 21456 21768 21841 21710 21367 21602 21392 21674 21481 22086 22189 22428 22165 22708 22602 23015 22696 22849 22504 22632 22200 22017 21092 21255 21175 21167 20665 20915 20743 21160 21332 22220 22291 22568 22002 21904 21411 21441 21346 21356 21012 21216 20952 21415 21664 22208 22626 22787 22358 21872 21872 21592 21557 21312 21639 21747 21988 21925 21959 22019 21782 21725 21591 21796 21543 21494 21569 21800 22214 21997 22368 21925 21949 21673 21788 21387 21523 21446 21704 21537 21973 21881 22082 21730 21979 21724 21880 21475 22273 21591 21654 21340 21529 21593 22080 21851 22302 21954 22388 21913 22349 21851 22098 21443 21661 21214 21783 21559 22025 21831 22069 17678 20790 20784 20715 21127 21488 20964 21571 21390 22040 24033 22996 22067 22176 21468 21751 21536 21883 21675 22279 21778 22091 21448 21888 21397 21777 21231 22085 21877 22358 21975 22372 21689 21853 21269 21671 21520 22183 21712 22160 21428 21876 21480 21591 21521 22133 21800 22314 21960 22256 21733 21827 21311 21690 21404 21835 21771 22204 21736 21965 21525 21954 21447 21712 21516 22261 22148 22423 21815 21726 21170 21496 21744 22400 21824 22138 21417 21965 21177 21302 21100 22180 22702 22961 22440 21802 20754 20823 20708 21489 22249 22433 21827 21527 21186 21169 21292 22514 22840 22705 21678 21252 20720 21478 21543 22277 22060 21582 21113 21186 21272 22424 22724 22615 21851 21367 21586 21485 21968 21877 21804 21424 21650 21464 22141 22149 22016 21802 21536 21438 21863 22031 21925 21798 21671 22039 21549 21431 21891 21949 22260 21729 21626 21376 21959 21931 21939 21541 21815 21318 21517 21856 22188 21970 21908 21318 21712 21845 22102 21490 21936 21333 21769 21893 22325 21712 21609 21400 22085 21836 21881 21114 21662 21482 22251 21988 22161 21332 21690 21420 22124 21685 21910 21477 21782 21318 22064 21910 22386 21704 21706 21239 20961 21476 21857 21369 21721 21424 21615 21447 22241 23992 22503 21404 21885 21609 22188 21760 21936 21196 21726 21352 21877 21825 22456 21909 21922 21326 21759 21821 22070 21585 22002 21296 21968 21670 22436 21809 21911 21320 22074 21760 21883 21480 21802 21351 22341 21961 22190 21303 21696 21621 22160 21719 21916 21591 21816 21479 22166 22037 22285 21696 21575 21400 21975 21831 21957 21529 21857 21485 21640 21705 22327 21941 22032 21498 21656 21351 21690 21518 22267 21824 22124 21589 21802 21479 21849 21457 21501 20870 21191 21022 21619 21757 22608 22563 22953 22573 22806 22780 23040 22779 22954 22713 22684 22311 22400 21879 21941 21491 21780 21508 21460 21020 21812 21550 21373 20766 20896 20615 21035 20888 21003 20901 21165 20936 20881 20752 21209 21974 23008 21431 21258 21581 22508 20622 22616 22192 21359 22033 21160 22528 21754 21769 21611 22199 21492 21872 21986 21733 21801 22208 21585 21619 22055 21824 21831 21799 21571 21718 21869 22218 21760 21773 21831 21435 21667 21938 22032 22019 21947 22080 21592 21809 21611 21605 21436 21552 21740 21895 21535 22180 21743 22293 21847 21989 21696 21561 21380 21730 21448 21781 21984 21980 22009 22148 21899 21881 21401 21734 21369 21928 21517 22275 21802 22250 21910 22032 21420 21652 21260 21793 21613 21888 21952 22123 21933 22181 21504 21813 21232 21626 21665 21896 21532 22193 21715 22363 21752 22020 21395 21712 21269 21939 21295 21307 21562 21829 21828 22087 21945 22043 21979 22082 22016 22096 21971 21958 21931 21816 21662 21840 21569 21942 21356 21723 21473 22144 21797 22363 21423 21883 21274 21858 21639 22119 21794 22025 21316 22144 21532 21908 21226 22215 21912 21968 21344 22284 21367 21681 21697 21956 21403 22023 21646 21772 21585 21994 21159 22253 21376 21780 21989 21920 21719 22279 21194 22191 21580 21858 21512 21653 21972 21668 21799 22080 21536 21935 21609 22287 21206 22024 21326 22280 21357 21897 21481 22183 21594 21816 21637 21805 21909 21819 21819 21623 21973 21664 21708 21650 21816 21869 21559 22225 21232 22347 21647 21767 21788 21600 21968 21785 21844 22088 21248 22119 21895 21560 21581 22082 21025 22742 21159 21709 22061 21050 22409 22086 21124 21821 22101 20889 22562 22483 21061 21595 22359 20794 22454 22504 20888 21472 22238 21652 20958 22949 22197 21111 20802 22173 21664 20934 22121 22907 21354 21422 21457 22465 21291 20910 21931 22965 21912 21198 21313 21965 22209 20896 21517 22890 22429 21221 21372 21544 22057 22024 21548 21340 21861 22052 22088 21559 16842 18060 19003 19246 19810 19616 19542 19515 19719 29077 24807 23415 22727 22035 21780 21665 21780 21779 22031 22014 21986 21536 21600 21344 21544 21633 12444 18637 20199 20397 20992 20907 21109 21063 20980 20591 26387 23179 22520 22092 22173 21714 21924 21585 22069 21648 22150 21849 22116 21851 22221 21655 21751 16423 19896 20277 20828 20592 21091 20791 21245 20823 21388 24224 22756 21732 21960 21435 21772 21290 21713 21235 21844 21329 21707 21293 21632 21273 21570 21251 19075 20273 20997 21036 21568 21179 21736 21484 21940 29721 23546 22208 22417 21863 22151 21652 21998 21508 21947 21789 21793 21345 21779 21283 21868 21637 22248 21043 21889 21731 22139 21618 21781 21391 21656 21128 23703 21769 22027 21504 22176 21847 22227 21733 22080 21655 22154 21520 21885 21421 21933 21217 21699 21329 21943 21755 22264 21948 22284 21970 22307 21736 21952 21577 21767 21185 21745 21376 21872 21779 22147 21805 22067 21672 21964 21441 22194 21552 21699 21313 21746 21737 22274 21974 22292 21771 22064 21513 21715 21152 21601 21568 22164 21889 22120 21588 21856 21479 21860 21261 21452 21212 22096 22445 22733 22080 21568 20814 21181 21479 22328 22081 22017 21621 21491 21156 21325 20979 21701 22429 23076 22534 21730 20725 21019 21713 22597 21869 21614 21281 21508 20832 21674 22432 22940 22244 21641 20718 20996 21521 22440 22296 21861 21204 21460 20919 21077 21016 21773 22528 22967 22536 21970 21011 20828 20965 22104 22254 21962 21280 21464 21265 21397 21594 21933 22250 22096 21888 21318 21591 21833 21997 21729 21703 21696 21717 21416 21506 21562 21594 21353 21517 21504 21840 21636 21719 21893 22016 21696 21494 21384 22112 22017 21597 21386 21717 21723 22045 21559 21576 21751 22237 21653 21611 21553 22129 21433 22074 21673 21730 21575 22081 21444 22024 21668 21795 21520 22055 21876 22263 21731 22305 21801 22382 21858 22272 21845 21998 21472 21744 21594 21873 21888 21767 21365 22316 21766 21687 21998 21938 21376 22290 21596 21948 21832 22109 21244 21620 21448 22379 21477 21703 21477 22037 21767 21737 21364 21992 21664 22135 21493 21817 21547 21901 21961 22119 21348 21590 21351 21882 21390 22183 21603 22343 21768 22364 21755 22331 21815 22139 21622 22167 21703 22228 21739 22240 21760 22365 21646 22196 21405 21925 21377 21688 21303 21622 21317 21845 21637 22096 21927 22054 21732 21921 21084 21815 21774 22332 21412 21763 21376 22263 21833 21863 21173 21920 21766 22343 20827 21621 21740 21970 21468 21596 21725 22188 21347 21869 21969 21840 21143 22096 21472 21656 21708 21986 21361 22009 21698 21713 21628 22016 21282 22064 21479 21555 21866 21859 21272 22331 21476 21813 21947 21954 21678 22242 21380 22137 21760 21394 21782 21719 21137 22192 21225 22022 21562 21159 22350 21696 21083 22956 21459 22117 22215 21152 22118 21159 21996 22039 20568 22977 21381 22451 21584 21650 21492 20872 22720 21255 22277 21401 22217 21480 21813 22786 20852 22362 20710 22825 21185 22562 20873 22752 21657 22254 21368 22426 21401 21479 22297 21623 21475 21755 21803 21991 21376 22285 21102 22845 21344 22275 21310 22069 21543 14465 18217 18717 19816 19127 19777 19640 19952 20087 19891 26006 23310 22935 22376 21905 11837 18339 20079 20613 20325 20615 20820 20531 21207 20464 26661 23447 22784 22530 21897 21805 19048 19896 21283 20960 21095 21170 21032 21376 21560 27008 23607 22592 21934 22073 22037 18708 20807 21098 21275 21557 21206 21228 21773 21224 21597 23459 22229 21919 22255 21530 19587 21223 21355 21248 21912 21111 21749 21900 21616 21202 23047 22091 21760 21818 22346 21323 21869 21768 21752 21470 22340 21504 21889 21608 22163 21226 22219 21884 21916 21461 21834 21802 21924 21272 22176 21973 21654 21347 21960 21663 21673 21432 22372 21705 21708 21322 21945 21660 21925 21192 21971 21821 22197 21335 21786 21440 22210 21541 21623 21522 22360 21868 21792 21274 21891 21437 22119 21495 21620 21454 22417 21893 21849 21152 21730 21365 22192 21613 21712 21426 22283 21838 21886 21180 21827 21482 22072 21792 21825 21187 21803 21740 22298 21536 21582 21505 21714 21715 22176 21543 21609 21341 22016 21863 22332 21520 21512 21575 21778 21691 22171 21632 21723 21171 21825 21786 22370 21737 21639 21261 21922 21603 22184 21472 
41064 42771 40311 39696 42707 37367 37575 36231 35780 42416 37682 40847 41645 42167 37265 35571 41029 42334 39560 38068 38390 34373 37656 34816 40544 35538 38987 36307 42487 36124 42283 40323 34111 35200 43223 42998 37717 39936 39162 37764 38924 41319 40259 37540 38330 37658 32968 36735 40800 36566 38912 38270 34076 34801 39212 42988 35047 37572 33863 40567 43032 38055 41523 38976 35458 34068 37409 41793 39747 33340 33624 38416 41376 41765 33687 34801 37760 42944 38949 35854 43064 39687 42180 41773 42002 35228 36393 33888 36172 38242 35306 37994 41792 41032 41593 39008 40395 39848 33095 36231 37596 36051 37152 39217 41320 39724 36916 33895 35527 41610 42436 34967 37102 42119 41636 33248 33997 38345 37298 37072 42504 33600 42375 33069 35515 39938 38768 39655 34579 41815 41600 34595 35712 39411 33047 40204 40696 35424 36280 41069 36624 35254 40832 35783 35654 38266 43088 35584 34519 34323 42096 40480 37467 41009 41760 33586 41665 39704 34263 38202 42279 37363 41193 34728 34817 42180 37696 37052 40448 35028 42453 40092 35297 38222 42664 36677 40018 37813 36528 42731 35448 34259 41351 38035 37047 33416 35257 35478 35188 36365 33701 35185 37501 36938 42974 39424 42871 43351 35284 38497 39348 33811 38813 38464 40938 37773 37024 38736 33831 36008 40373 41136 38369 41431 42286 34487 33730 40301 35568 36887 42697 42999 37730 37966 43952 34408 33808 38073 38457 42240 40960 36138 36802 40352 38459 41959 36480 35543 34992 37097 35524 39968 39239 34526 39702 39442 39616 38816 41120 38984 35793 36956 41008 37352 35088 42915 43397 34624 41051 38401 38400 41291 34227 37122 37329 35432 35704 42162 42376 37835 40097 38312 37238 41478 34872 36644 38508 33437 34231 42845 35016 37309 41035 35671 35425 40721 37659 35936 37207 34208 32800 35787 41144 36033 36722 39721 38391 35587 39698 42984 38868 40455 35975 35725 42208 36096 35000 41769 39910 36136 37584 33444 36352 40743 40763 38512 39702 41658 34232 42675 41112 34551 38539 41392 35866 42359 40937 38615 38930 42359 34374 41238 41544 34570 36225 32896 35660 34585 41655 37721 39297 42695 34247 42429 40336 36214 38156 42842 37888 41160 37015 36433 42321 38121 38881 33689 35049 40256 38401 36468 39504 33824 35609 40005 41626 39922 37601 42880 39032 35604 39790 35572 42902 37537 33002 28884 35421 33349 40419 35150 37365 41796 34773 40291 41065 42163 42413 39016 35465 38532 40970 35601 38402 37524 36433 35963 38432 38189 34151 35133 41721 33632 38735 41412 37921 42496 33400 39080 35936 33591 34226 35333 37876 41673 36632 35363 41216 34513 36256 38600 33624 33962 41448 35979 36354 40677 38354 38673 41792 34914 41582 39077 36299 37488 36678 34426 42131 41034 38816 39670 40738 35879 34981 39328 42372 36096 41989 35940 37448 41284 34464 34759 42142 40480 34316 38070 33576 34400 35595 41891 37463 38425 39801 36362 36548 38168 43086 33948 32859 42391 35344 36724 40011 39747 34642 36994 37526 37164 41030 38585 37260 41936 37360 39780 33911 35770 40805 34636 39937 34473 41129 35053 40523 34699 42543 38032 33479 36156 32793 36274 41719 34985 40711 34528 32922 39332 41209 36776 33984 43160 40818 40471 36576 32929 40337 37128 40080 36323 38026 41926 39920 43291 41629 43953 41627 38537 38986 38356 34444 37616 41624 38712 41894 36703 36246 36762 40035 34875 39952 35142 35062 35649 38368 33821 42534 34562 39866 39809 35418 43008 36545 37687 32848 35325 41282 43088 35850 34354 38919 42866 36064 37939 41509 33356 33703 33234 36778 33511 38435 39979 40435 40846 42233 39665 38407 35348 37507 43016 37740 41248 41443 34016 35402 42637 40238 37718 42336 39157 40966 35480 37891 41776 35154 40713 34592 41008 35234 41728 35760 42969 35304 42373 37548 42169 37285 40208 36898 42416 36902 32687 35497 41426 38385 41834 35385 41085 34683 41033 36224 42970 39098 34695 40329 34919 42285 37298 41218 38550 42104 38455 41706 36545 39605 35163 34909 41640 34231 40776 34913 41848 40333 36152 38880 36656 38711 35130 38400 42400 35973 36554 35408 41697 34191 41444 35048 42700 39584 40728 43088 40480 35686 34313 39021 35480 37000 43700 35049 40500 38618 38784 40511 39945 39915 34256 36696 34887 39266 41228 41029 41623 34103 38374 37270 42036 42497 41554 41766 37930 39970 37313 42163 34757 40375 34744 36264 42196 37184 36976 33864 33367 40604 34665 35668 38248 37697 38163 38598 36084 35585 33968 35926 33364 42756 33802 35989 40704 38787 42258 37896 38128 34936 36018 41770 33280 42171 35368 33036 38044 37307 39224 35571 38344 35569 37095 42730 41309 34226 34490 41222 33364 33765 38930 37026 41664 38073 42551 37745 42288 37204 39438 42496 35084 40118 36240 33575 38466 36752 39200 33163 35272 35090 34844 39045 42790 37575 33657 41653 38919 39972 38872 39252 40281 42865 36210 32954 37175 34963 41271 36033 39492 42466 37224 41898 36073 40482 39488 37313 42228 38572 42394 35357 36945 40506 35079 32704 40308 35297 39882 42288 37334 42741 34304 32784 39739 36251 41674 38178 41166 35824 36512 41203 35264 41847 36948 35941 40653 35738 38185 33142 37683 42525 35409 32855 41145 40099 43106 36819 35635 39424 43015 35831 42295 36567 40006 42263 38368 39794 41024 39058 40355 35805 38278 43057 36549 34864 35822 34457 42632 41458 43112 36845 33197 39476 39592 40898 43964 37298 35545 34978 40106 34720 42618 33657 41088 39282 34034 38940 39728 40564 42912 35984 34634 36878 41751 33994 42797 38216 37270 36332 42002 34694 42393 40395 40163 38473 36336 32999 42214 37328 38912 37750 36240 34900 38731 33603 42144 37435 38084 41313 35685 34353 41232 38309 37888 37880 33344 36352 40992 33264 36551 40485 38251 37416 41082 35328 36711 39554 42952 37859 41303 36024 37199 41884 35392 34128 41623 39552 36809 37280 39124 34929 42683 41569 38521 40168 41312 35271 42034 40049 35177 37392 42793 36256 41016 39089 37531 42496 35416 35208 40410 37408 42675 37110 41744 35703 41895 34688 42356 41244 39626 44020 42313 37641 34196 40368 35696 37563 39968 35765 41316 37378 36439 43123 37736 37554 41299 36344 36601 39181 33888 38336 40704 38121 34853 42784 36532 37547 41016 39416 35640 37316 42720 36492 41536 42246 38323 40685 41202 35126 34252 39818 35666 37496 34033 36217 42833 40453 38956 41573 35168 33728 41613 38528 36773 38032 33197 36678 42945 34624 35131 41879 38084 38587 43120 34839 41456 35271 32967 41316 36515 39833 34061 36124 42850 37121 42464 43467 36552 39880 38144 34337 35907 34191 33714 38160 34177 36465 36522 38930 36726 38312 35794 35288 41719 42611 37600 37921 43008 36183 32723 42258 38167 36387 33509 41696 35439 36338 33484 38010 36438 37735 36675 39604 37078 36308 34737 39974 38391 38837 42421 40627 34108 43652 33932 34359 40192 41912 38876 39448 33355 35712 35783 34227 40584 43057 37196 38288 35686 36185 40471 33956 34163 38944 36421 36683 36297 33610 35237 37108 40814 35712 35960 36641 42391 35007 37623 38539 38607 38085 39140 33948 36131 34237 33991 42156 33517 35528 37303 33416 40128 36096 41427 37095 38425 34994 33472 41345 35664 42265 36240 38144 38376 38745 39972 37507 37288 41912 35847 41640 37811 33108 41037 36434 41184 37632 38550 42214 34738 40297 36199 34309 36889 37740 39957 37984 40456 32739 36235 40091 34563 34529 37084 33176 40281 35520 42312 36012 38413 41872 35383 40443 37975 41088 41398 33808 36445 36438 39442 38016 39002 38485 39272 38424 39366 38292 38080 37863 36405 34794 36441 33525 37700 41590 35808 42554 39986 36317 42354 42647 37651 40592 37002 34486 39735 36176 38586 41024 39904 33334 37216 40240 41017 37577 37984 41236 41540 41992 35128 34939 37824 42074 38885 34710 35793 33698 38336 39623 41479 41625 36099 38391 37444 35541 41313 40039 40855 34001 36697 32773 34405 37992 34765 36212 39072 33140 37794 34212 41443 40202 38671 41351 41408 41858 37520 42848 40795 34176 36229 34339 36305 37413 36609 36566 34439 38104 34613 35195 34343 36247 37131 33653 40647 40320 42353 34947 35816 36035 33828 37825 36080 36574 39273 40154 40023 37479 33498 33738 39029 37972 36080 39508 35530 39147 38374 42769 39577 39060 36726 39533 36641 33763 43300 38669 34188 42195 35715 43164 43976 36713 42496 41440 34677 37377 38319 40649 39277 35672 40353 34680 36937 39834 38104 41524 42487 42753 43506 41153 37072 37857 38516 37434 40018 41088 38425 40684 36560 33075 37488 43030 40463 41932 33506 38893 38603 33474 41181 37198 38880 39376 33698 34056 37093 37099 39600 35655 33162 32416 32141 34391 41894 37623 43399 36231 38707 35970 34633 35780 35892 38853 38907 38358 33080 33672 41014 33445 34071 28508 32743 39766 42062 37585 36853 38984 38580 37593 33481 43919 41127 44106 39789 40537 35441 37484 33792 39056 34434 39882 36974 39644 37075 40976 34893 35847 29383 36160 40508 36044 33042 38558 35596 40523 36061 41680 41984 36376 35488 37904 42459 36135 40727 35446 40293 36845 41120 35575 40851 34316 40448 33718 40106 37836 40457 37760 38135 33474 39624 35652 42770 37991 38746 44713 40871 42890 37376 40153 34659 38544 32820 37848 36204 36049 41267 36151 40615 37223 34375 40960 38344 37160 35591 40073 34354 35896 41922 34788 38893 36420 35815 38680 32659 39936 37036 40929 35814 39049 34819 39968 32967 37239 42265 38096 40119 35316 41037 38133 36045 41255 38139 41417 38277 41696 35793 37730 33805 35769 39597 35800 41321 37123 35968 39913 36544 39135 34872 38032 42294 40638 33425 34996 40811 35829 35620 41032 38404 41430 36169 38912 33024 35193 39100 34068 33280 39911 37229 39712 33950 36613 42861 37120 40521 42663 40343 39430 43352 36341 39099 33554 35659 39761 43011 42086 39459 38565 34457 42785 39593 41385 37773 35222 42913 39784 33657 35345 34815 37781 35274 34231 37099 34347 40421 32896 35591 34759 42610 38416 41149 34665 34762 37381 32910 42727 41703 37224 39907 42604 37233 38615 37818 36005 33112 38403 33511 37944 37852 35942 37369 39492 41500 38290 40513 42682 40630 42043 34202 37717 41243 39497 37128 41064 34216 36512 38615 35556 35254 34841 35309 41888 32919 33363 33783 41321 33283 32377 36300 34230 35411 37175 38320 34992 42849 41904 39714 38544 34187 41588 35629 35529 38924 33720 33488 35787 41104 34787 34219 33223 39629 42436 39504 34962 35385 33714 39072 42369 38765 34800 36069 32750 38892 37160 41482 35803 41456 36458 42595 37104 41024 36960 38624 42576 35828 33925 36921 36967 35907 41612 41970 36020 35121 38528 37784 41445 41508 34245 37826 36548 39752 40610 34428 42178 42819 43104 35626 42698 39037 35992 35648 41478 38560 34615 39953 43136 36749 33464 37287 38080 39912 41474 34161 41439 37461 41876 40743 34274 42001 35958 42256 36234 41992 36726 40109 34497 40171 35465 40768 35952 40844 35694 42360 34844 40393 42233 37909 41573 35206 40936 34530 40947 36952 34391 39168 37856 39024 35609 37453 38720 36598 35969 41896 42180 36001 41320 41664 36849 37108 39659 37493 35814 42083 36334 34323 35557 38018 42744 34295 35496 40418 41604 37393 38092 36592 39346 39394 42637 34826 35188 38194 41569 38851 35160 35193 34325 38201 40613 39073 43010 33783 36892 36952 40452 42183 42944 36679 38016 37904 35052 40912 41760 40220 35702 41626 36211 35513 39018 40442 40433 38710 33682 39400 42326 35191 38672 38432 42624 39984 41056 39362 39879 39712 38619 38992 32992 38288 41712 43398 34006 34247 42712 36439 35536 40360 41431 42164 41040 42935 36657 36256 36074 42240 34898 36762 39669 33888 36201 35915 34533 41216 41830 43080 42247 43142 41856 34687 42624 36224 36370 38474 41453 41664 39240 37330 41217 41433 41334 39395 33529 29712 38434 33997 35489 38376 35208 33565 36953 38741 36720 40004 42255 38425 42418 37568 33090 39849 38917 33481 40938 33704 35538 32425 39876 42522 36896 43556 36460 33281 37141 36326 37488 36544 40640 37322 38936 39570 38084 41447 33669 40120 35399 33966 37730 39286 38880 33699 35568 38752 40771 33701 39836 40407 36149 40086 34320 43435 41264 37932 41531 33361 32876 40092 41763 40263 37536 39139 35949 37269 34085 39745 39463 39619 35678 36416 42022 41472 37416 35746 35730 42729 42171 32816 36920 34064 40016 40403 41104 37458 37568 42613 36885 36240 37507 40480 40308 38354 34661 41331 38157 34963 34792 42083 42544 35505 35225 41060 38101 34743 37548 39782 38336 36674 40583 41536 36252 42080 40837 33492 34292 32784 41952 37292 35940 40522 37367 42481 40114 43248 34544 42475 42944 37509 36880 39192 35600 41585 40556 34514 35037 41991 41665 36988 37409 39752 36678 42816 39400 36056 36385 39739 36506 35713 41444 33235 33720 32530 35048 35290 40056 33548 34023 41325 38519 37185 41952 33078 32583 33583 35696 35140 40288 34276 35444 39541 36564 36048 42205 35904 34438 40384 37632 34130 40203 42665 
23218 22215 22864 22444 23288 22586 22316 23276 21967 23804 22055 23120 21993 23380 22647 22693 23216 22064 23764 22183 22411 23049 22039 23872 22037 22553 22828 22488 23521 22199 23074 22209 22944 23424 22472 23301 21773 23725 22169 22528 23204 21923 23685 22274 22312 23313 21864 23837 21969 22473 22788 22241 23284 22389 22664 22711 22609 22998 22564 22533 22767 22656 23016 22440 22959 22436 22872 22735 22603 22871 22433 22950 22867 22772 22821 22381 23026 22641 22740 22800 22548 22976 22706 22445 22988 22291 23067 22698 22774 22683 22730 22667 22752 22536 22896 22633 22653 22608 22563 22939 22721 22439 23216 22825 22749 22815 23192 22287 23322 22371 22622 22567 22972 22369 22555 22618 23291 22393 22667 22555 23104 22635 22834 22135 22912 22678 23363 22376 22949 22341 22690 22504 23141 22832 22809 22401 22648 22209 22753 22578 23173 22675 23248 22656 23352 22551 23252 22407 23188 23180 23322 22897 23168 22639 23468 23379 23701 22912 23115 22580 23188 23105 23581 22974 23286 22762 23033 22794 23658 23290 23458 22824 23255 22592 23372 22968 23589 22767 23193 22694 23105 23127 23748 2367 15427 15664 16779 16686 17057 16530 17131 17136 17964 28573 25892 24410 24518 24069 24397 23699 23890 23335 23584 23516 24166 23592 23564 23056 23620 23467 23611 23086 23314 22883 23661 23465 23628 22984 23065 22917 23592 23241 23495 22976 22983 22408 23154 24012 24230 23079 22546 22284 23339 23676 23270 22793 22808 22405 22869 23829 24204 23121 22331 22708 23764 23303 22868 22523 22547 23687 24173 23488 22435 22157 23276 23271 23031 23088 22660 22966 22837 23472 23175 23127 22605 22947 23137 23316 23008 23078 22800 22855 22833 23426 23176 23168 22629 22905 23022 23272 22842 23050 22665 23127 22929 23559 22928 22976 22643 23332 22891 23104 22745 22951 22887 23553 23054 23268 22477 23021 22795 23436 22663 23125 22514 22934 22964 23489 22845 23022 22443 23177 22889 23095 22614 22993 22503 23441 23009 23457 22474 22918 22589 23255 22922 23115 22680 22973 22421 23345 22959 23535 22658 22928 22540 23344 22745 23021 22579 22976 22441 23298 23168 23429 22728 22859 22425 22947 22889 23255 22684 22966 22648 22809 22513 22969 23021 23480 22990 23074 22423 22808 22899 23384 22764 23172 22514 22344 22580 23920 23815 23462 22391 22057 22490 16515 17720 17633 17709 17792 18562 19740 19094 18311 17842 25004 24459 24861 24105 23464 22981 22859 23000 23980 24213 23318 23226 22805 23292 23268 23504 22953 23083 22808 23053 23327 23329 22819 22853 22950 23314 22887 23033 22705 22935 22958 23534 23138 23211 22612 22897 22967 23249 22775 22995 22560 22896 22605 23420 23059 23481 22821 22880 22508 23201 22843 23107 22496 22952 22550 23468 22958 23290 22413 22907 22862 23311 22663 22355 22376 23047 22992 23414 22560 22849 22519 23237 22670 23011 22539 22857 22556 23415 22997 22922 22404 23156 22853 23078 22357 22870 22891 23375 22616 22823 22248 23223 22770 23143 22505 22953 22545 22784 22379 22976 22720 23216 23072 23248 22958 23274 22994 23425 23054 23330 22961 23374 22968 23277 23020 23424 22937 23057 22592 22572 22091 22214 22305 22901 22615 23097 23325 23545 23226 22955 22375 22107 21760 22007 21916 22152 22239 22590 22669 22960 23624 23897 23617 23639 22986 22423 22145 22167 22405 22387 22361 22631 23250 23089 22883 22400 22665 22919 23296 22895 22662 22659 22740 22854 22976 22486 23122 22971 22625 22511 23142 22646 22669 22796 23324 22371 22917 22508 22982 22849 22688 12159 19111 19363 19547 19111 19795 19400 19978 19811 20355 25602 24005 23431 23799 23360 23808 23288 23164 22546 23189 22608 23112 22548 23255 22711 23234 22845 23319 22962 23384 22855 23282 22876 23281 22645 22970 22432 22992 22480 23173 22652 23183 22688 23241 22697 23216 22807 23249 22806 23141 22779 23097 22629 23015 22468 23010 22476 22949 22519 22944 22469 23178 22610 22880 22424 22720 22276 22899 22612 23214 22892 23300 23013 23258 22895 23141 22783 23106 22460 22688 22385 22695 22473 23011 22773 23101 22764 23048 22686 22848 22424 23025 22522 22768 22595 22688 22466 22545 22060 22218 22005 22216 22240 22825 22768 22884 23089 23648 23735 23856 23725 23749 23003 22889 21978 21888 21778 22123 22535 23055 23281 23452 23341 23223 22840 22656 22407 22089 22669 22450 22523 22473 23014 22926 23220 23040 23132 22663 23062 22649 22664 22315 22531 22502 22929 22826 22968 22578 22813 22487 22558 22378 22629 22312 22703 22521 23072 22971 23213 22945 23170 22693 22886 22500 22696 22237 22637 22230 22799 22512 23212 22798 23092 22583 22820 22426 22784 22904 22912 22308 22870 22220 22679 22261 23044 22684 23352 22894 23193 22563 22821 22201 19450 19849 20678 20557 21193 20821 21276 20689 21176 28896 23737 22823 23176 22689 23493 22985 23541 22934 23264 22596 22784 22272 22770 22592 23198 22748 23084 22437 23087 22379 23047 22160 22794 22553 23296 22856 23222 22580 22836 22213 22746 22536 23141 22691 22885 22507 22784 22277 22697 22196 22625 22584 23136 22889 23289 22797 22983 22376 22669 22275 22726 22683 23083 22644 22839 22401 22784 22169 22503 22689 23424 23253 23170 22305 22141 21888 22289 22651 23394 23241 23140 22277 22431 22053 22090 22578 23529 23571 23850 23373 22640 21889 21954 22278 23299 23168 22663 22257 22530 21958 22485 22972 23769 23488 23559 22652 21877 21991 23141 23232 22841 22278 22528 22108 22838 23130 22946 23177 22673 22491 22318 22916 22791 22752 22451 22591 22357 22672 23005 23129 22844 22743 22346 22430 22385 22819 22768 22893 22476 22598 22268 22760 22802 23214 22635 22738 22193 22687 22754 23020 22550 22757 22528 22637 22455 23200 22785 22906 22138 22739 22582 22999 22389 22744 22396 22742 22784 23237 22583 22631 22272 23008 22578 22912 22727 22757 22310 23251 22839 23261 22452 22613 22128 22993 22668 22993 22327 22864 22183 22658 22692 20219 21485 21761 21096 21748 21468 22165 21665 21954 21455 23397 22636 23440 22814 23255 22281 22703 22225 23054 22671 22874 22388 22765 22542 22610 22327 23221 22799 22976 22141 22776 22631 23040 22400 22867 22276 22703 22633 23210 22611 22743 22135 23040 22577 22957 22433 22592 22215 23102 22838 23147 22444 22547 22357 23042 22660 22882 22367 22756 22216 22729 22818 23154 22704 22644 22243 22708 22520 23060 22553 22736 22521 22684 22336 22906 22791 23209 22861 23077 22544 22688 22159 22503 22102 22581 22492 23064 22925 23213 22913 22908 22560 22580 22215 22958 22144 22512 22652 22473 22185 22304 22231 22201 21962 22069 21879 22129 22205 22341 22217 22479 22648 22564 22282 22489 22812 23396 23370 23656 23639 23822 23609 23749 23659 23747 23444 23197 22439 22070 22227 23144 22681 21824 23407 22925 22263 22857 22273 22570 23314 22119 23031 22405 22937 22454 22531 22784 22651 22311 23177 22320 22498 22580 22917 22760 22838 22288 22736 22796 23040 22648 22868 22543 22355 22440 22822 22848 23032 22925 22944 22943 22807 22629 22796 22361 22521 22357 22576 22343 22903 22466 23029 22600 23135 22599 22833 22384 22505 22310 22780 22455 22688 22738 22917 22822 22979 22420 22752 22161 22544 21962 22929 22391 23283 22593 23063 22520 22681 22230 22602 22234 22766 22665 22859 22760 23058 22674 22871 22295 22609 22213 22583 22145 22919 22295 23193 22587 23221 22497 22852 22226 22583 22037 22681 22249 23209 22375 22781 22657 22840 22688 22951 22799 22863 22712 22784 22615 22849 22479 22771 22490 22842 22209 22587 22127 22916 22626 23184 22309 22960 22293 22695 22336 23126 22583 22833 22080 22839 22573 22973 22294 22823 22812 22750 22044 22917 22469 22702 22357 22968 22542 22596 22566 22950 22229 23042 22437 22757 22484 22663 22555 22781 22176 23275 22124 22779 22724 22663 22612 22889 22211 22850 22167 23162 22187 23037 22109 23121 22433 22960 22416 22959 22784 22960 22274 23179 22274 22972 22225 23117 22112 22817 22294 22986 22314 22718 22345 22872 22716 22608 22579 22476 22631 22748 22419 22953 22167 23175 22375 22049 22683 22583 22572 22983 22166 22727 22560 22476 23153 22489 22217 23120 21942 23054 22465 22352 22661 22897 21740 23687 22478 22261 22538 23172 21504 23146 22713 22315 22341 23288 21734 22850 23586 22343 22388 22696 23040 22007 22255 23781 22743 22062 22184 23143 22672 21768 22694 23721 22600 22061 22269 22777 23081 22007 21827 23552 23174 22101 22189 22475 23171 22638 21822 22210 22969 22925 22788 22245 22772 22424 11799 14758 15420 15394 15970 16316 16919 16951 17040 16727 26916 25285 24551 24038 23997 23785 23751 23229 23127 23174 23520 23383 23639 23328 23586 23088 23114 15163 17173 17431 17932 17838 18607 18151 18604 18446 19023 25724 25100 24215 24201 23619 23715 23024 23233 22848 23241 22766 23265 22948 23344 22976 23582 23207 18668 19304 20104 19834 20323 20039 20549 20167 20574 29292 25293 24144 24264 23618 23949 23388 23729 23115 23655 22919 23437 23032 23584 23001 23374 22999 23488 20127 21214 20887 21462 21050 21440 21056 21414 20899 25478 23308 23431 22651 23135 22528 22994 22466 23088 22604 23284 22866 23405 22892 23173 22618 23002 19478 21863 21448 21920 21426 21879 21558 22049 21916 22343 23808 23799 23112 23477 22869 23326 22501 22854 22224 22837 22281 22698 22350 23028 22690 23127 22765 23190 22487 22888 22887 23066 22503 22904 22393 22680 22434 22999 22727 23273 22933 23303 22824 23035 22645 23056 22449 22690 22400 22785 22673 23087 22815 23014 22568 22805 22529 22935 22439 22679 22424 22752 22723 23266 22961 23157 22650 22917 22331 22592 22269 22724 22773 23200 22826 22886 22465 22550 21969 22326 22696 23660 23625 23384 22546 22096 21802 21981 22247 23305 23255 23217 22488 22217 22080 22121 22603 23737 23680 23432 22241 21924 22277 22634 23136 23200 22454 22488 22145 22208 22872 23529 23755 23452 22609 22075 21799 22657 23197 23445 23274 23075 22494 21821 22320 22023 22392 23159 23650 23760 22930 22011 21708 22261 22976 22825 22796 22550 22643 22491 22473 22471 23195 22903 22956 22281 22561 22655 22998 22792 22987 22744 22828 22695 22888 22903 22920 22663 22520 22300 22694 22732 23129 22890 22697 22374 22657 22675 23029 22320 22663 22715 23192 22609 22610 22352 22927 22562 22458 22816 22936 22509 22919 22210 23146 22445 22998 22833 22656 22295 22973 22680 23176 22441 23206 22568 23161 22583 23276 22608 23143 22676 22677 22218 22807 22784 23109 22163 22803 22510 22941 22356 23014 22232 22799 22556 22685 22256 22912 22710 22691 22321 23075 22511 22873 22103 22818 22672 23070 22198 22696 22363 23176 22599 22618 22201 22764 22716 23012 22811 22791 22222 22618 22409 22884 22326 23176 22405 23323 22528 23307 22515 23233 22642 23168 22620 23159 22575 23255 22628 23315 22503 23188 22352 22796 22427 22603 22344 22637 22220 22722 22605 23058 22785 22868 22572 22177 22073 22641 22482 23273 22267 22729 22126 23063 22828 22846 22238 22608 22557 23296 22297 22588 22305 23113 22554 22647 22448 23172 22322 22597 22711 22802 22246 22646 22613 22713 22134 23067 22501 22534 22631 22957 22132 23056 22548 22597 22606 22688 22119 23005 22274 22804 22433 22488 22744 22711 22160 23168 22316 22730 22834 22846 22632 23091 22105 23000 22913 22227 22775 22496 22203 22865 21775 22997 22336 21965 23468 22316 22803 23347 21909 23384 22444 22492 22554 21997 23638 22178 23277 22305 22693 22423 22249 23514 21876 23064 21685 23797 22720 22822 23067 22279 22420 22155 23345 22183 22796 21811 23638 22005 23071 21968 23471 22443 23213 21960 23708 22040 23092 21740 23577 22047 22496 22056 23114 22622 21934 22760 13687 15239 15488 15829 16497 16096 16998 16404 16872 30720 26253 25105 24445 24108 23693 15686 17964 17729 18349 18428 18448 18998 18632 18632 19119 25798 25406 24116 24085 23872 15289 19256 19677 19344 20251 19776 20307 20214 20096 20039 26225 24152 24568 23793 23664 23463 20522 20491 21613 20608 21278 21194 21231 21118 21777 25440 24142 23740 23426 23270 23847 20947 22046 22002 21948 22101 22581 21612 22208 22065 22198 23025 23809 23076 23117 22743 23537 22602 23431 23084 22927 22638 23435 22565 22999 22979 23338 22529 22968 22777 23161 22357 23228 22993 23131 22377 23047 22837 23068 22359 23440 22849 22907 22672 23096 22806 23064 22353 23170 22919 23319 22273 23059 22562 23216 22631 22798 22712 23289 22889 22738 22570 22884 22761 23195 22389 22722 22561 23484 22649 22737 22478 22965 22634 23272 22509 22698 22552 23272 22919 22763 22496 22922 22686 23117 22535 22695 22442 23160 22925 23196 22509 22661 22506 22995 22756 22927 22274 22801 22710 23271 22945 22896 22267 22852 22452 23126 22749 22852 22266 22710 22629 23241 22912 23074 22390 22741 22622 22839 22701 23143 22446 22593 22806 23620 
22208 22077 22473 22054 22888 21888 23067 21727 23122 21660 22764 21910 22761 22283 22570 22170 22327 22404 22542 21803 22919 21602 23111 21811 22518 22259 22364 22545 22240 22055 22690 21959 23143 21660 22758 21766 23110 21963 23191 22203 22404 22352 22576 22253 22987 21740 23096 21656 22568 22152 22389 22768 22167 21865 22919 21729 23137 21767 22567 22016 22579 22452 22280 21957 22557 22103 22993 21751 23079 21489 23040 22107 22543 22128 22476 22285 22733 21997 22834 21655 22999 21904 22786 22295 22183 22233 22837 21748 22736 21901 22569 22430 22375 22411 22460 22327 22405 21949 23041 21815 22816 22237 22171 22312 22599 21639 22871 22306 22085 22112 23361 22007 22088 22545 22531 21537 21819 22478 23711 21777 21349 21898 23250 23260 22379 21209 21338 21565 22835 22720 23483 22087 21229 21186 22041 22731 23132 23385 22162 21924 21819 21320 21536 20912 21189 21000 21496 21208 21399 21273 21659 21511 21968 21872 22113 21412 21608 21363 21578 21195 21461 20868 21340 20988 21313 21671 21932 22393 22040 22924 22219 23047 22241 22122 21673 22386 22455 22778 21741 22208 22211 22514 21880 22416 22367 22169 4461 6432 7041 7980 7889 8486 9168 31520 29484 28041 26037 25364 24773 24835 24244 24192 23473 23312 22725 23524 23274 23174 22135 22515 22544 22967 22160 22637 21661 22626 22470 23117 22247 22355 21588 22312 21915 22822 21827 22528 21459 22163 21943 22976 22065 22358 21259 22240 21902 22493 21640 22327 21461 21862 21853 22752 21766 22012 21453 22546 21670 22316 21302 22057 21652 22766 22011 22145 21307 21719 21644 22557 21736 22231 21400 22131 21725 22830 21871 22165 21160 21961 21744 22459 21733 22129 21430 21808 21873 22664 21972 22038 21194 22079 21895 22327 21609 22061 21152 22131 22177 22603 21477 21845 21665 22582 21760 21955 21097 21651 22077 23392 22752 21848 20508 21276 22332 22816 21525 21621 20745 22077 23124 23384 21933 20953 20945 22457 22506 21863 21209 21082 21267 22880 23182 23126 21627 20813 21264 22104 22231 21701 21793 21258 21801 21937 22592 22132 21848 21621 22065 22209 22309 21687 22005 21469 22049 21966 22716 22095 22326 21549 21729 21770 22387 21971 22040 21655 22083 21469 21799 21665 22635 22283 22385 21484 21856 21523 22529 21710 22325 21409 22162 21397 22645 21959 22947 21708 21912 5753 9371 10407 12007 12327 13223 13536 15273 14748 33549 29881 28545 26481 26644 25344 25091 24368 24116 22976 24073 23560 24016 23065 23088 22383 23202 22441 23527 22077 22824 21783 23455 22734 22950 21877 22583 22446 23000 22036 22396 21784 22444 22333 23068 22444 22506 21623 22379 22112 22720 21965 22504 21792 22256 21625 22413 22559 23216 21908 21517 21642 22903 22613 22240 21387 21507 21888 23621 23065 22028 20885 21397 22349 22734 21606 21622 21095 22948 23384 23310 21389 21081 22156 22916 22577 21863 21395 21233 22560 23511 22661 21678 22240 22316 22405 21818 21999 22215 22619 22273 22306 21672 22137 22099 22551 22191 22406 21846 21979 21652 22039 21617 21952 21556 21909 21674 22063 21728 22286 21929 22575 22109 22657 21997 22557 21456 22045 21565 22041 21920 21795 21641 22456 22000 22788 21800 22398 21399 22101 21383 22420 21868 22733 22050 22733 22064 22934 22337 22810 22314 22800 21664 22297 21360 22227 21768 22730 21673 22480 21952 22641 22069 22497 21305 22319 22043 22967 22158 22412 21277 21956 21728 22809 21618 22135 22343 22628 21524 22401 21962 22299 21639 22900 22136 21936 21496 22503 22068 22259 21525 22474 9191 12465 13045 14724 15195 16549 16668 17431 16750 17277 29575 28484 27126 26428 24361 23645 22772 23705 22989 23505 23431 23866 23510 23395 22650 22446 21750 21721 21376 21618 21194 21312 21202 21488 21809 22185 21833 22099 21621 21664 21190 21409 21093 21332 21056 21241 21057 21000 21906 22094 22388 22094 22720 22400 22717 22457 22775 22368 22726 22399 22645 22391 22444 22231 22183 22127 22416 22112 22352 21615 22092 21816 22284 22245 22871 22486 22825 22537 23008 22450 22615 21975 22317 21466 22243 21547 22461 21978 22579 22132 22881 21995 22789 22042 22747 21948 22763 21847 22529 21759 22535 21148 22404 21577 22442 21568 22185 21588 22283 21735 22702 22160 23043 22437 22928 22039 22704 21700 22279 21463 22343 21464 22355 21837 22665 22026 22775 22052 22645 21785 22703 21752 22203 21402 22373 21904 22899 22320 23132 22145 23035 22132 22443 21671 22193 21624 22421 22157 22824 21916 22649 21754 22449 21489 22510 21497 22138 21613 22373 22097 22787 22488 23045 22477 22880 22324 22811 21879 22263 21472 22058 21693 22132 22134 22860 22349 22989 22352 22477 22406 22395 21799 22042 21325 21724 20973 21452 22115 22829 23122 23769 23324 16023 16591 16861 16755 17139 17470 18685 19174 19976 28864 27031 24985 24336 23209 22670 22538 22799 23012 24050 24069 24114 23590 22529 22457 22093 22464 22421 22988 22472 22833 22288 22390 22222 22337 22005 22374 22685 22988 22743 22698 22086 22006 21806 22440 22368 22830 22343 22615 21906 22480 21827 22216 21760 22297 21988 22840 22534 23085 22369 22800 21687 22248 21660 22703 22343 22642 22011 22489 21754 22134 21844 22768 22358 23134 22157 22917 21632 22325 21612 22438 22166 22817 21782 22602 21611 22360 21498 22290 21936 22960 22487 22994 21970 22293 21577 22416 22112 22859 21849 22842 21680 22410 21760 23083 22176 23243 22088 22397 21510 22501 22112 22716 21879 22653 21674 22312 21897 22760 22391 22904 21798 22249 21629 22862 22036 22609 22248 22397 21514 22577 22236 23104 22302 22841 21888 22151 21736 22673 22139 22564 21867 22343 21664 22640 22396 23063 22103 22215 21715 22324 22182 22702 21853 22406 21607 22219 22228 23014 22300 22246 21637 22434 22119 22658 21808 22273 21271 22727 22918 23298 22029 21587 21593 22923 22597 22070 21724 21415 21330 22688 23482 23272 21943 21309 21035 22183 22769 22784 21716 21812 21308 17175 19705 21218 20622 20789 19393 19503 20421 21367 21080 24418 23064 22519 22693 23994 24109 23669 22396 21388 21755 22920 22813 23148 22280 22104 22190 21801 22575 22635 23040 22064 22087 22130 22656 22391 22493 22053 21987 22278 22865 22612 22432 21853 22081 22507 22586 22055 22455 21880 22474 22480 22949 22334 22347 21646 22322 22218 22696 22149 22389 21803 22123 22179 22926 22553 22720 21952 22148 21811 22608 22259 22612 21804 22344 21658 22160 21796 22562 22402 23077 22465 22980 22032 22605 21705 22126 21536 22320 21776 22598 22176 22851 22194 22776 21937 22852 22075 22812 21965 22640 21832 22538 21745 22460 21782 22770 21989 22378 21681 22583 21653 22186 21948 22634 21656 22147 21589 22205 21701 22448 21707 22642 21851 22611 21662 22275 21559 22489 21760 23030 21652 22354 22318 22651 21628 22576 21889 22553 22392 22188 22071 22160 22419 22326 22237 22729 21633 22720 22160 22182 22196 22930 21993 22216 21798 22817 22314 22861 21598 22468 21629 22647 22209 22945 21852 22400 21737 22215 21710 22155 21881 22561 21468 22638 22007 22925 22159 23006 22243 22487 21880 22169 21641 22229 21878 22354 22352 22470 22465 22718 22299 22400 21660 22077 21704 22310 21851 22747 21886 23180 22210 22564 21712 21979 21635 22330 21920 22455 22458 22675 22485 22636 21612 21882 21316 21640 22017 22748 22081 23675 22440 23488 22533 22423 21164 21473 20967 21813 22329 21928 23368 22534 23462 23140 22885 23047 22519 21833 21136 21373 21184 21103 21122 21400 21109 21552 21376 21894 22257 22619 22355 23096 23341 22648 23194 21365 21059 21399 21611 23083 22729 23287 21685 21251 21324 22656 23492 21910 20864 22615 22529 22429 21059 22748 23512 21966 21316 23188 22376 21728 22570 22017 21981 22172 22470 21678 22935 21961 22180 22628 22171 22260 22575 21723 22540 22349 22047 22381 21859 22531 22400 22310 22448 21942 22362 21768 22840 21623 22728 21703 22904 21959 22693 21642 22969 21735 22627 21714 22944 21812 22465 21992 22480 22369 22406 22036 22487 22334 22198 22231 22016 22416 22459 21982 22769 21597 22787 21804 22675 22059 22256 22231 22763 21608 22456 22024 22279 22324 22609 21909 22744 21632 22769 22176 22473 22032 22662 21600 23063 21866 22468 21928 22793 21395 22913 22080 22439 21984 22833 21443 22845 22407 22240 21975 22550 22075 22026 22027 23057 21804 22404 21684 22715 21794 22337 22186 23149 21611 22493 21697 22892 21866 22164 21829 22956 21969 22212 22280 22577 22236 22353 21649 22957 22245 22747 21657 22321 21799 22688 22188 2449 5519 8989 10163 12348 12316 13364 12854 14023 13824 34603 31244 30250 28053 27536 25588 25579 24774 25464 24736 25002 23867 24094 23111 23434 22932 23546 7205 10945 12360 14304 14743 16044 16171 17196 17063 35467 31932 30023 27600 27049 25552 25625 24872 25319 24453 24808 24158 24560 23822 24367 23787 23605 22912 12228 13833 15757 16185 17317 17190 17907 17984 18678 31897 28885 26474 25538 24634 24266 23372 23352 22996 23067 22867 22931 22199 22601 21992 22395 21991 13045 14905 16683 17511 18909 19101 20215 20712 21398 21494 29975 28012 27084 26173 25769 24967 24740 24029 23328 22542 22108 21883 21877 21994 22903 23304 23635 18945 19975 20129 20512 20698 20391 21085 20633 21042 20645 24997 24102 24143 23636 23959 23458 23732 23316 23343 23233 23381 22897 22938 22396 22456 22199 22599 22758 22957 22763 22848 22616 22856 22295 22721 22455 22712 22129 22465 21954 22586 22460 23069 22672 23168 22882 23334 22636 22728 22241 22337 21944 22393 22309 22914 22551 22933 22157 22683 22275 22619 21875 22232 21821 22756 22464 23269 22604 23145 22296 22725 21850 22354 21864 22576 22313 22950 22085 22595 22016 22392 21775 22682 22417 23251 22355 23043 21988 22460 21639 22663 22027 23058 22127 22663 21973 22401 21644 22868 22452 23105 22246 22535 21636 22189 22156 22865 22226 22599 21778 22386 21627 22856 22406 23351 22371 22640 21479 22400 21659 22725 22083 22888 22096 22702 22304 22491 21632 22576 22264 23169 22392 22871 21658 22338 22007 22550 22345 22838 21917 22455 21760 22471 22068 23087 22264 22790 21451 22195 21643 22659 21990 22776 21953 22572 21673 22389 21640 22617 22310 23079 22331 22589 21609 22596 22072 22785 21769 22262 22130 23142 22371 22408 22087 22506 22362 22439 21700 23087 22144 22301 22285 22329 22525 22263 22196 22411 21875 22784 22407 22533 21659 22129 21800 22051 21641 22119 21685 22201 21600 22268 21908 22403 22681 22633 21387 22205 22342 22839 21305 22323 21992 21479 22248 22583 21040 22336 22966 21514 21600 23698 22837 21767 21217 22349 23192 22255 21093 22528 22392 23527 21679 21631 22016 22408 23417 22637 21172 21292 21607 23680 22737 23538 22793 22383 21623 21514 21111 21401 20971 21504 21042 22069 21810 21939 21445 21706 21229 21691 20892 21402 20912 21536 21828 22919 22910 23349 22672 22610 22379 22439 22096 21732 22020 22036 22528 22385 22903 22105 22320 21698 22493 22577 22389 22057 22013 22248 22741 22071 22226 21821 22633 22749 22251 21918 22512 22297 22539 21735 22678 22454 22227 21892 22984 21920 22259 22434 22447 21735 22864 21890 22028 22339 22327 21667 22841 21863 22007 22541 22468 21623 22983 21944 22487 22563 22487 22112 22870 21632 22775 22175 22083 22124 22174 22177 22596 21655 22839 21875 22215 22352 22969 21831 23121 21740 22698 22248 22160 22027 22497 22128 22542 21451 23094 21523 22739 22161 22393 21997 22201 22430 22528 22134 22519 21975 22454 21943 22921 21595 22926 21755 22861 21607 22708 22040 22759 21817 22534 22130 22494 21717 22326 22391 22313 22087 22321 22401 22200 21831 22385 22362 22500 21863 22720 21927 22873 21941 22784 21573 5397 7095 10217 11144 12379 13183 13755 13723 14949 35991 34037 30183 29528 26999 27209 10180 13009 14146 16293 15755 17798 16837 17856 17959 36193 33249 30457 28366 28160 26032 13838 15064 16967 17799 18564 18728 19931 18853 20044 19845 31413 29468 27949 26125 26201 16049 17860 19034 19788 19668 20854 19815 21216 20928 20768 28983 27863 25648 26101 24952 24112 20209 21273 20565 22770 21763 21071 21518 22560 20952 26659 26305 24721 23363 24080 24034 22555 23603 23907 22225 23100 23701 22314 22727 24576 22583 22510 22712 23636 21981 22304 23802 23966 21833 22593 22729 23226 21340 22824 23956 22723 21571 22528 22890 22873 21319 22473 23873 23601 21783 22007 22051 23287 22638 21756 22000 23971 23177 22292 22402 22201 22757 22529 22598 22019 22648 22745 23189 22093 22406 22257 22707 22581 22476 21946 22385 22832 22940 22512 22018 22225 22686 22404 22592 21814 22426 22587 23073 22710 22435 21797 22581 22042 22903 22074 22193 21945 23064 22656 22893 22273 22215 22041 22405 22128 22923 22099 22275 21838 22944 22576 23303 22240 22514 21675 22905 22152 22825 22360 22503 21640 22584 22466 23124 22110 
