# Supplementary material for: An Active Feature Selection Strategy for DWT in Artificial Taste
Source: Hindawi journal article supplement (doi:10.1155/2018/9709505), 2018-01-01
Supplement: f1 [file 9709505.f1.zip › maofengTea-low-2.txt]

43477 43488 42192 40496 55 4028 14041 17976 19062 20488 20560 21244 20955 21646 21336 22042 21466 22144 21632 22509 22050 22748 22075 22855 22319 23015 22293 23060 22483 23172 22553 23233 22693 23249 22721 23131 22370 22912 22274 22960 22320 22928 22245 22906 22173 22743 22028 22724 22073 22609 22021 22720 22168 22715 22198 22743 22510 22870 22312 22864 22451 23020 22183 23065 22290 22930 22362 23132 22439 23248 22584 23143 22537 23070 22562 23036 22573 22966 22424 22758 22297 22704 22244 22560 22247 22592 22328 22776 22507 22950 22624 23184 22813 23247 22862 23392 22952 23367 22960 23325 22962 23214 22888 23192 22423 22472 21993 22120 21892 22332 22096 22279 22330 22517 22488 23138 22978 23419 23138 23399 23155 23322 22820 22827 22301 22501 22305 22119 21840 21905 21710 21825 21755 22013 21742 21792 21750 22041 21967 22016 22442 22733 22465 22534 22952 22688 22976 22801 23217 22839 23123 22752 23222 22882 23197 23058 23351 23108 23296 23094 23272 23009 23189 22820 22930 22320 22754 22443 22967 22647 22434 22652 22901 22488 22868 22639 22852 22769 23076 22808 23172 22832 23245 22731 9645 15643 17559 17768 18821 18482 19236 18829 19639 19095 30336 25865 25212 24003 24335 23656 24021 23296 23557 22776 23109 22528 23147 22633 23470 22887 23159 22384 23177 23035 23553 22756 22811 22362 23113 22764 23149 22215 23317 22931 23074 22252 23222 22680 22946 22509 23607 22332 22818 22636 23015 22321 23477 22631 22952 22611 23177 22250 23377 22599 22970 22592 23015 22530 23448 22168 23180 22451 23020 22894 22752 22415 23197 22549 23349 22285 23125 22342 23296 22535 22864 22704 22944 22923 22886 22780 22759 22817 23074 21906 23165 22217 23361 22241 23040 22602 22887 22996 22674 22441 23076 22386 23501 22185 22978 22524 23116 23143 22332 22919 22048 23488 22798 22245 23408 21732 23588 22964 22449 23131 22213 22908 22927 22483 23468 21808 23455 23180 22336 22774 22627 22505 23914 21888 22572 23017 22035 23758 22555 22389 23396 21801 23713 22713 22448 23008 22880 22359 23799 22260 22615 23104 22372 23393 22651 22967 22649 22972 22458 23356 22585 22565 22861 22856 22552 23340 22779 22605 22612 23122 22382 22992 22948 22747 22518 22915 22468 23024 22912 22946 22536 22867 22760 22704 22615 23461 22304 23047 22576 23236 22117 23138 17331 19376 19634 20801 20776 21053 20520 21802 21251 32020 25357 24665 23660 23565 23040 23816 23058 23107 22614 23550 22560 23051 22778 23623 22578 22936 22433 23221 22784 22928 22348 23201 22929 23463 22233 23023 22696 23302 22201 23206 22839 23434 22416 23109 22356 23296 22611 22773 22485 23383 22894 22861 22432 23053 22605 23256 22418 22861 22424 23458 22890 23415 22238 23070 22424 23240 22681 23157 22129 22864 22683 23577 22748 22780 22339 22743 22437 23093 22821 22997 22277 22948 22807 23496 22915 22976 22311 22934 22486 23076 22800 23008 22172 22887 22823 23376 22813 22857 22246 22940 22514 23026 22817 22846 22020 22482 22963 23845 23488 22456 21840 22649 22448 23300 23004 22471 21700 22562 23405 24093 23309 22609 21879 22592 22387 23100 23160 22682 21791 22086 23517 23909 23156 22328 21940 22544 22485 22936 23338 23152 22056 21914 22728 23775 23816 23447 22384 22336 22686 22469 22895 22766 23192 22670 22631 22566 23243 23074 23066 22412 22575 22286 22791 22791 23189 22744 22700 22397 22921 22822 23363 22876 22671 22312 23032 22556 23088 22758 23095 22431 22580 22492 23172 22921 23312 22727 22806 22229 23111 22450 22999 16843 20544 20592 21252 21044 22056 21831 22425 21777 21829 25288 24199 23232 23845 22839 23111 22327 23409 22946 23668 22757 23208 22183 23130 22272 23026 22770 23259 22496 22756 22501 23264 22933 23424 22672 22822 22233 23097 22409 23059 22617 23282 22589 22792 22558 23408 22889 23335 22320 22882 22478 23136 22658 23326 22486 22905 22119 23210 22736 23473 22266 22853 22188 23048 22631 23280 22478 22791 22290 23104 22796 23424 22758 22985 22209 22973 22496 23077 22708 23031 22305 22695 22545 23251 22944 23324 22605 22710 22222 22950 22737 22877 22677 23193 22584 22827 22164 22825 22631 23416 23108 23409 22254 22298 22072 22976 22678 23342 23065 22235 21683 22758 23236 24009 23084 22184 22035 22423 22569 23282 23246 22769 21873 22882 23383 23941 23410 22872 21995 22115 22346 22615 22712 23337 22941 22185 21636 22304 22917 23766 23879 23477 22336 22200 22792 22871 22890 22752 23056 22481 22595 22830 23286 22981 22976 22369 22616 22681 22796 22690 23016 22853 22883 22358 22679 22561 23234 23081 23125 22225 22703 22748 22912 22685 23143 22536 22681 22551 23354 22891 22680 22385 22966 22442 23304 22447 22725 22400 23403 22901 22950 22096 21376 21261 22353 21721 22102 22010 22944 22169 22581 25776 23857 22763 23509 22759 23008 22386 23287 23031 23222 22305 23072 22540 23345 22476 22870 22601 23556 22163 23107 22452 23291 22158 23472 22657 22644 22676 22736 22757 23124 22550 23200 22320 23361 22254 23041 22309 23409 22373 22994 22636 23203 22393 23040 22604 23032 22631 22711 22661 23040 22764 22956 22773 22825 22528 22941 22568 22960 22717 23079 22771 22777 22921 22884 22688 22660 22915 22839 22807 22672 22970 22706 22722 22755 23205 22363 22666 22282 23361 22192 23036 22033 23644 22089 22792 22240 23309 22498 22363 23120 22382 23267 22681 23405 21896 23929 21987 23015 21989 23529 22802 22656 23206 21945 23579 22635 22874 23350 21909 23909 22192 22828 23312 22233 23149 22679 22788 22712 22807 22565 23257 22448 22857 22871 22561 22765 23266 22391 23201 22867 22752 22503 23309 22278 22807 22708 22992 22318 23278 22663 22688 22489 23169 22387 22707 22830 23320 22133 22905 22619 23005 22212 23296 22965 22792 22381 23012 22693 23081 22134 23215 22834 23293 22093 23104 22327 23352 22327 22757 22503 23390 22701 22818 22534 22948 22582 23213 22340 22830 22566 23555 22724 21384 21809 22616 22165 22885 21984 22520 22448 23184 22320 23428 22790 23131 22676 23227 22263 22905 22500 23500 22880 23149 22193 22760 22421 23066 22693 23072 22363 22739 22596 23400 22968 23260 22375 22768 22264 22926 22519 23223 22586 22843 22230 22983 22866 23438 22746 22715 21904 22651 22492 23066 23079 23217 22253 21865 22652 23847 23887 23386 22381 22121 22165 22660 22393 23192 23296 23010 22090 21858 21888 22400 23349 23844 23545 22908 22151 22059 22289 22747 22817 22705 23078 22796 23136 22533 22668 22306 22660 22883 23212 23095 23413 23040 23111 22680 22656 22328 22855 22460 22836 22553 22938 22441 22933 22653 23212 22709 22999 22505 22740 22214 22763 22152 22779 22266 23040 22465 23303 22770 23500 22814 23368 22423 22993 22190 22835 22080 22941 22357 23126 22383 22932 22343 23047 22528 23357 22644 23267 22173 22855 22054 22774 22215 23037 22412 23197 22720 23405 22861 23424 22841 23277 22468 23082 22344 22772 22145 22791 22240 22973 22545 23058 22424 23016 22636 23205 22711 23129 22650 23070 22520 22789 22306 22794 22237 22682 22368 22995 22639 23285 22992 23414 22940 23047 22151 22008 21812 22310 22259 22581 22277 22585 22912 23411 23160 23205 22442 22281 21701 21875 22179 22962 23331 23830 23734 23676 23392 23092 22640 22046 21946 22550 21952 22432 22856 22607 23063 22779 23158 22710 22913 22465 22495 22349 22616 22490 23142 22996 23192 23049 23284 22736 22966 22251 22664 22324 22967 22806 22870 22498 23108 22752 22958 22293 22665 22135 22784 22483 23157 22762 23496 22860 23477 22722 23206 22200 22880 22087 22790 22346 22927 22340 22982 22506 23169 22741 23168 22262 22784 22052 23031 22500 23402 22825 23493 22728 23216 22405 22688 22325 23285 22448 23033 22407 23195 22675 23191 22400 22823 22158 22786 22432 23328 22912 23378 22613 22816 22200 22612 22343 22624 22444 22992 22613 23120 22539 22869 22265 22704 22361 23031 22939 23520 23245 23832 23607 23766 22401 22341 21840 22090 21970 22165 22149 22696 22548 22497 22537 22972 23172 23289 22935 22908 22495 22117 21870 21890 21716 21856 22025 22132 22749 22750 23083 23016 23245 23016 23431 23059 23194 22940 23090 22807 22928 22501 22550 22339 22801 22516 22900 22570 23232 22603 22672 22823 23399 22680 22706 22300 22924 22535 23193 22345 22697 22451 23361 22615 22775 22448 23028 22614 23044 22133 23435 22721 22864 22266 23243 22150 23482 22243 23143 22251 23394 22034 23264 22139 23415 22656 22997 22839 23078 22600 23276 22080 23252 22592 22880 22544 23001 14359 18208 18424 19696 19310 19802 20073 20679 19998 41018 27042 25175 23543 24304 22942 23741 22660 23760 22616 23257 22586 23367 22944 23025 22855 23078 22512 18519 19584 20578 20960 21666 20327 21575 22368 21687 31314 25245 24550 24077 22311 23008 23895 24292 22934 22376 22507 22632 23113 23574 22973 22407 22103 11084 20992 22192 21873 21673 21236 21556 21784 21824 22023 27167 24386 23447 23577 23308 23354 23063 23216 22822 23044 22668 22925 22613 23040 22453 22930 22528 17706 20937 21850 21543 22048 21588 22276 21776 22221 21722 24848 23109 23249 22633 23194 22646 23305 22769 23318 22709 23401 22732 23340 22748 23288 22564 23096 20740 22407 22033 22490 21968 22724 21910 22496 21933 22599 23040 23283 22652 23351 22924 23584 22969 23424 22729 23204 22368 23079 22290 22825 22125 22961 22250 23156 22600 23297 22722 23208 22751 23004 22439 23022 22404 22708 22413 22952 22704 23213 22998 23453 22805 23360 22704 23084 22429 22603 22212 22539 22475 23232 23142 23331 22480 22581 22253 22460 22192 22281 22279 23126 23616 23960 23593 23016 21932 21896 21916 22895 23190 23382 23104 22657 22432 22295 21966 22089 22745 23000 23304 22957 23155 22498 22657 22477 22497 22574 22987 22912 23040 22584 22780 22582 22641 22300 22904 22604 23341 22970 23205 22904 23169 22391 22655 22423 23239 22628 23155 22427 22980 22540 22709 22366 23193 22848 23434 22670 23301 22301 22795 22304 23277 22632 23021 22412 23005 22169 23057 22832 23442 22535 22789 22096 23143 22548 23214 22363 23136 22170 22869 22880 23434 22699 22743 22230 23137 22528 23335 22325 22911 22200 22978 22861 23376 22401 22710 22372 23284 22620 22826 22377 22760 22551 23203 22903 23330 22472 22720 22376 23207 22504 22876 22585 22625 22248 23016 23107 23686 22665 22337 21754 22272 22812 23475 23124 22613 22353 22160 22080 23336 23709 23378 22795 21954 21769 22948 23229 22939 22391 22385 21922 22338 23104 23972 23693 23318 22634 22397 23030 22845 22959 22469 23001 22293 22702 22971 23304 23008 22704 22247 22844 22737 23155 22533 22859 22428 22725 22788 23439 22801 22965 22185 22907 22650 23229 22443 22894 22144 23025 22822 23396 22567 22773 22163 23049 22602 23191 22416 22945 22083 22728 22438 23342 22772 23194 22329 22809 22409 23200 22668 23028 22299 22890 22115 23253 22760 23411 22457 22728 22180 23078 22616 23139 22414 23001 22061 23185 22712 23414 22357 22869 22272 23241 22711 23145 22429 22901 22215 22953 22848 23286 22580 22668 22378 23180 22640 22893 21878 22759 22509 23265 22877 22831 22297 22956 22777 22892 22400 22116 22240 23696 23553 23192 22282 21876 22529 23501 22743 22483 22124 22137 22912 24000 23130 22060 21957 23133 23239 22696 22707 22285 21993 23343 23784 23713 22898 22320 22662 22760 23089 22538 22775 22314 22656 22954 23286 23063 23162 22538 22561 22596 23080 22670 22908 22352 22661 22416 23171 22784 23405 22885 23276 22600 22997 22223 22768 22218 22964 22603 23239 22698 23083 22407 22942 22389 23075 22374 22730 22136 22772 22105 22805 22247 22771 22098 22663 22076 22968 22695 22994 22356 23140 22552 23260 22486 6607 16552 18749 18912 20072 20085 20766 20263 20463 19901 31037 25447 24749 23324 23488 22875 18636 20399 21348 20716 21512 21229 21735 21529 22042 32125 25483 23906 24192 23607 23354 17518 21064 21544 22039 21561 22531 21770 22234 22106 22000 25784 23512 23636 22588 23960 17267 21640 22129 21959 22448 21173 23600 21944 22887 22528 24768 23517 22448 24132 22760 23592 21649 21824 22575 21724 23776 21788 23223 21863 23542 24418 23411 22928 23336 23026 22964 22825 23187 22634 23065 22624 23133 22690 22585 23078 22720 23308 22528 23175 22338 23466 22339 22990 22696 23220 22802 22960 22726 22856 22801 23133 22503 23174 22400 23068 22773 22826 22633 22775 22796 23238 22291 23210 22362 23072 22867 22900 22381 23205 22376 23046 22791 22710 22426 23348 22319 22827 22760 23431 22130 23107 22512 23276 22321 22843 22583 23409 22767 23161 22103 23112 22260 23206 22551 23356 22388 22832 22141 22852 22520 23280 22793 23378 22934 23301 22632 22880 22389 22642 22256 22839 22466 23117 22417 22892 22474 22960 22669 23111 22787 23158 22958 23319 23064 23396 23128 23544 23276 23399 23265 23456 23136 23168 23261 
21629 22223 21626 22007 22160 22813 21274 22237 21625 22496 21420 22504 22013 22503 21419 22147 21738 22471 21571 22029 21655 22811 22040 22379 21275 21731 21585 22637 21617 22009 21560 22679 22139 22499 21674 21987 21633 22278 20546 20928 20773 21133 20713 21036 20423 21123 20957 21076 20871 21149 21171 21318 21316 21392 21675 21448 21703 21508 21852 21401 21930 21560 21979 21671 21889 21760 21808 21593 21699 21255 21424 21178 21477 21249 21609 21149 21737 21376 21881 21441 21924 21552 22113 21819 22049 21769 22376 21969 22279 21793 22301 21941 22288 21751 22222 21546 21952 21480 21692 21185 21771 21169 21673 21115 21872 21637 21787 21476 22071 21460 22256 21553 22367 21718 22408 21429 22044 21331 21969 21273 21850 21232 21860 21287 21912 21364 21884 21596 22464 21816 22546 21683 22499 21784 22584 21685 22508 21876 22615 22067 22506 21923 22695 22071 22656 21952 22549 21820 22461 21865 22476 21843 22537 21678 22311 21515 22186 21313 22048 21191 21870 21216 21805 21369 22244 21437 22196 21581 22227 21727 22376 21803 22184 21868 22388 21837 22322 21573 21929 21471 21921 21284 21840 21373 53 1720 5312 6688 8528 9149 10382 10688 11735 11888 33472 28660 26752 24768 23872 22704 22432 21836 22395 21820 22214 21985 22913 22161 21719 21057 22176 23094 23175 21784 21312 21437 21948 22281 22465 20744 22011 22933 22571 20999 21909 22136 21975 21107 22897 22656 21276 21513 22522 21149 22027 22976 21408 22022 21935 22124 21581 22444 21764 22157 21929 21927 21955 22445 21719 22016 21885 22076 22311 21741 21830 21915 21852 22507 21547 22130 21768 22319 21829 22179 22037 21991 22155 21814 21795 21930 22179 22077 21909 22282 21524 22510 21610 22176 21655 22139 22109 21794 21703 22215 21536 22635 21360 22154 21677 22308 21986 22044 21751 22096 21997 22289 21465 22442 21322 22579 21753 22256 21687 22147 21715 22586 21400 22454 21329 22631 21920 22022 21671 22295 21550 22763 21185 22235 21729 22085 21981 22263 21781 22490 21417 22569 21749 22144 21669 22210 21436 22689 21351 22185 21884 22024 22013 22162 21459 22506 21378 22310 22021 22053 21624 22538 21497 22377 21956 22099 21559 22391 21757 22028 22041 22499 21353 22073 21901 22214 21853 22646 21416 22216 21876 22196 21405 22528 22071 21902 22151 22330 21664 22099 22168 58 7625 11512 12623 14099 13924 15288 15515 15776 15171 34976 28869 25953 23872 24615 23779 22535 21811 22430 22564 21567 21920 23463 22324 21319 21548 22411 22487 21635 21105 22441 22944 22814 21145 21527 21828 22669 21095 21569 22807 23013 21377 21205 21524 22370 22052 21299 21403 23051 22936 22285 21013 21547 22190 22030 22099 21640 22272 22096 22633 21812 21882 21640 22424 21889 22231 21801 21755 21760 22431 22238 22337 21655 22122 21767 22103 21955 22182 21760 21926 21693 22448 22201 22518 21538 21817 21587 22209 21771 22441 21816 21817 21674 22557 22076 22432 21462 21911 21344 22231 21815 22493 21547 22057 21559 22411 22150 22584 21651 21936 21808 22307 21800 22571 21573 22149 21525 22684 22009 22541 21440 22051 21808 22247 21805 22519 21650 21914 21530 22372 22158 22465 21387 22099 21419 22349 21846 22480 21690 22129 21372 22417 22082 22642 21761 22045 21421 22377 21699 22071 21995 22429 21500 22090 21447 22698 21934 22481 21307 22153 22001 22225 21799 22597 21576 22021 21557 22451 22107 22721 21958 21987 21507 22185 21808 22476 21832 22128 21481 22026 21760 22556 22217 22528 21789 21922 21520 22590 21751 22343 21968 22233 9547 14488 15881 17614 17768 18308 17703 17769 17811 18609 28938 26068 23640 22656 22412 23104 23368 23371 21958 21472 21363 21870 21720 22432 22467 22484 21076 21430 21995 23215 22989 22637 21489 21213 21293 21798 21705 22414 22429 22071 21232 21167 21378 23145 22760 21975 21064 21398 21549 21996 22435 22139 22040 21588 22016 22022 22589 22135 22168 21489 22151 21836 22311 22075 21897 21616 21961 22218 22551 22265 22233 21684 22004 21774 22054 21842 22391 21625 21984 21672 22336 22279 22544 22002 21927 21574 21944 21708 22161 21875 22366 22000 22149 21399 22183 21876 22596 22204 22579 21845 22051 21457 22210 21582 22371 21965 22308 21588 21996 21715 22682 22049 22545 21354 22092 21626 22382 21900 22375 21645 21925 21710 22592 22103 22503 21420 22053 21463 22276 21536 22472 21760 22479 21539 22059 21739 22605 22040 22600 21862 22029 21441 22093 21625 22240 21909 22480 21378 22257 21545 22740 21809 22288 21226 22343 21594 22401 21895 22493 21646 22125 21414 22080 21958 22647 22099 22407 21504 22133 21964 22184 21879 22461 21691 21917 21719 22572 22132 22319 21416 22149 21783 22369 21609 21856 21713 22691 22174 22186 21277 21966 10030 17209 18148 18599 19295 20995 20120 19519 19370 19823 28273 25433 23675 22395 21548 22809 23351 22967 21323 21719 21740 22656 21864 21170 21738 23141 22254 21312 21500 22675 21221 21920 23149 21771 21382 22699 20981 23113 21968 21872 22375 21667 22620 21590 22198 21875 22423 21955 22092 22016 21988 22148 21939 22063 21980 22278 22001 22121 21908 22263 22080 21985 21912 22215 22573 21994 22097 22055 22180 22016 21949 22195 21984 21963 22008 22187 21934 21798 22013 22150 21930 21829 22201 21946 22075 21653 22176 21908 22290 21731 22077 22056 22074 21664 22295 21772 22473 21657 22502 21457 22711 21585 22507 21405 22620 21418 22301 21594 22529 21788 22392 21825 22154 21868 22485 21615 22647 21375 22773 21339 22340 21947 22104 22123 22193 21667 22642 21414 22643 21981 22102 21670 22375 21373 22763 21900 22005 21672 22581 21424 22373 22108 22083 21625 22504 21569 22299 22231 22236 21734 22230 21924 21988 21874 22791 21759 22023 21676 22420 21645 22204 22221 22283 21298 22516 21949 22327 21277 21859 22761 22855 21442 21563 21581 22502 22220 21122 21967 23112 22746 21514 21316 21715 22176 22682 21147 21237 22091 23167 22445 21603 21239 18448 20480 20965 20165 20481 21443 22451 21488 21016 27576 23737 23318 22460 22273 21901 22438 22471 22430 21931 21783 21696 21994 22080 22361 21883 21834 21681 22502 22226 22615 21765 21848 21564 21896 21766 22396 21991 22253 21448 22051 21897 22732 22099 22473 21598 21901 21728 22279 21901 22528 21791 22121 21435 22331 22002 22776 21687 22188 21516 22277 21704 22368 21923 22440 21575 22035 21399 22344 21911 22733 22002 22587 21350 21904 21581 22548 21488 22445 21815 22479 21888 22016 21373 22151 21477 22613 22049 22760 21897 22336 21531 22000 21385 22080 21600 22531 21680 22163 21782 22414 22001 22508 21851 22390 21723 21977 21555 22109 21671 22475 21969 22483 22189 22689 22288 22618 22407 22487 21826 21929 21248 21366 21434 21647 20816 21848 21601 22141 22023 22610 22432 22617 22094 22177 21344 21340 20945 21279 21940 22711 22750 23104 23040 23109 22829 22825 21948 21931 22060 21609 21935 21543 21968 21732 22210 21837 21960 21911 22160 22042 22217 22008 22375 21914 22085 21594 21981 21526 22009 21692 22110 21912 22419 21959 22560 22103 22742 22075 22666 21908 22095 21458 22034 21530 22301 21696 22320 21632 22352 21749 22548 21784 22235 21395 22087 21395 22109 21808 22551 22016 22765 22080 22533 21770 22179 21301 22065 21262 22205 21600 22332 21829 22427 21952 22339 21808 22288 21391 22023 21468 22239 21774 22663 21971 22697 22199 22549 21832 22304 21455 21988 21575 22076 21704 22164 21781 22413 21916 22429 21760 22216 21458 22220 21939 22634 22135 22825 22243 22597 21954 21776 21025 21441 21024 21716 21334 21832 21558 22229 22236 22626 22315 22215 21490 21446 20874 21315 22141 22892 22996 23200 22492 22176 21306 21323 21154 21453 21805 21874 22161 22016 22563 21988 22177 21658 21830 21671 22041 22221 22439 22291 22604 21944 21970 21467 22063 21544 22168 21795 22364 22001 22473 21775 22219 21507 21982 21745 22391 22067 22679 22203 22633 21911 22332 21619 22122 21361 22265 21415 22295 21530 22333 21760 22410 21859 22414 21859 22523 21788 22097 21433 22020 21335 22235 21683 22435 21801 22636 21895 22863 22125 22728 22144 22492 21875 22405 21449 22314 21262 22069 21307 22043 21489 22245 21498 22240 21683 22354 21897 22489 21719 21928 21687 22720 22038 22070 21490 22136 21797 22394 21655 22033 21770 22711 22295 21703 21569 22145 22112 22316 20965 22030 22988 22091 21044 21918 22384 21279 22913 21244 21774 21810 22677 21505 21797 21211 23035 21428 22321 22239 21000 22701 21606 21992 22231 21579 22499 21842 21812 22076 3806 8416 11161 11561 12615 13482 13310 13912 14273 40904 31433 27212 25975 23739 23995 22742 23441 22274 22702 22044 22839 22234 22327 22105 22341 22004 61 8766 13579 14830 16231 15927 17577 17217 17417 17047 36042 28660 26243 24029 24309 23263 23365 22224 22667 22167 22774 22089 22711 21636 22333 21840 23003 6017 14094 15799 17664 17824 18775 18615 19287 18910 20034 30881 27021 24418 23965 22677 22860 21996 22610 22137 22458 21956 22442 21905 22427 21948 22464 21975 13488 17401 19553 19763 20562 20152 20908 20539 20997 20530 27536 24523 23826 22748 22705 21821 21832 21244 21723 21190 21340 20963 21397 21234 21824 21819 22400 18606 20712 21047 21474 21171 21321 20929 21153 20912 27213 23687 22808 22163 21763 21541 21832 22299 22097 22532 22424 22765 22451 22606 22395 22407 22025 22209 21885 21867 21722 21921 21819 22313 22009 22364 21975 22205 21836 21492 21610 22054 21504 22020 21568 22520 21689 22573 22175 22774 22022 22501 21649 22103 21361 22217 21657 22539 21920 22535 21748 22235 21909 22142 21330 22037 21760 22518 22221 22693 21943 22347 21394 22058 21620 22328 21888 22537 21587 22322 21751 21911 21445 22361 21767 22658 22058 22803 22128 22560 21653 22151 21498 22229 21863 22406 21826 22387 21656 21986 21534 21911 21666 22358 22040 22619 22151 22556 21646 21918 21494 22099 21873 22424 21848 22187 21778 21568 21021 21943 22400 22859 23011 22557 21331 21232 21310 22519 22340 22070 21465 21594 21091 21908 22842 23249 22487 21612 20964 21751 22236 22444 21568 21718 20987 21975 22500 22196 22301 21492 21910 21736 22297 22062 22119 21805 21846 22113 22539 22336 21929 21624 22077 21976 22314 21748 22084 21497 22034 22123 22647 22008 22125 21456 22447 21902 22389 21730 22273 21438 21971 21945 22804 22017 22597 21632 22092 21345 22368 21904 22440 21619 22045 21399 22243 22196 22673 21981 22391 21317 22196 21707 22579 21738 22155 21547 21885 21733 22336 22112 22738 21706 22050 21429 22439 21835 22517 21540 22056 21368 22352 21938 22751 21934 22064 21421 22067 21915 22453 21732 22041 21393 22165 22022 22635 22044 22042 21442 22300 22041 22364 21723 22124 21380 22187 22436 23044 22231 21479 21076 21467 22050 22621 21829 21717 21307 21179 21712 22985 23012 22461 21252 21319 21049 22183 22416 22150 21624 21545 21127 22441 22962 23096 22281 21264 21800 21701 22411 21929 22074 21724 21945 22187 22459 22186 22009 21584 21894 21901 22330 21929 22121 21484 21940 21932 22571 22132 22048 21623 22293 21924 22284 21772 22226 21398 22368 22144 22464 21501 22069 21857 22373 21549 22208 21237 22517 22055 22800 21699 22135 21410 22465 21732 22216 21735 21922 21626 22711 22032 22368 21286 22349 21782 22486 21607 22400 21401 22092 21831 22723 22002 22050 21280 22352 21760 22461 21606 22192 21219 22253 21520 22576 22133 22468 21541 22117 21847 22384 21754 22210 21589 21930 21385 21938 21702 22498 22129 22647 22064 22602 21834 22065 21381 22068 21683 22152 22114 22603 22188 22492 21952 22055 21584 21770 21537 21783 21296 21047 21600 21833 21541 22502 22397 22636 22272 21922 21272 21181 21048 77 8086 12033 13539 14540 13522 13991 14766 14859 15496 34935 29225 25933 24931 24096 23872 10366 14025 15954 16919 17366 18104 17880 18080 17606 36296 29263 26753 24524 23709 22796 11874 16131 17973 18354 19840 18896 19981 19568 19701 37111 28416 25255 24259 23547 23171 13209 17921 19203 20534 19923 21201 20006 21183 20230 21223 27016 24903 23609 23128 22553 16634 19718 20917 20659 21808 20784 21862 20840 22141 20866 25926 23185 23643 21984 22798 21776 23091 21595 22663 21602 22856 21719 22459 21970 22322 22157 22242 22017 22133 22215 22228 21773 22211 21933 22604 21858 22566 21509 22748 21844 22198 21890 22251 22010 22342 21394 22485 21506 23040 21670 21776 22294 21481 22151 22933 20957 21891 22435 21325 22165 22721 21115 21975 22456 21221 21953 23309 21821 21495 21766 22600 21515 21097 22163 23160 22461 21896 21906 21798 22105 21952 22407 22022 21881 21580 22051 22149 22404 22254 22452 22161 22289 21687 22001 21574 21928 21861 22231 21768 22212 21932 22311 21894 22424 22042 22410 21872 22241 21720 22094 21431 22105 21418 22173 21351 22042 21543 22187 21498 22160 21441 22196 21622 22022 
21035 21288 21035 22819 22117 21096 21344 22528 21481 20970 22293 22862 21319 21107 21232 22233 21972 21493 21545 21808 22251 21845 21453 21489 21655 21939 21905 21431 21497 21856 22225 22023 21896 21275 21851 21504 21888 21960 21882 21433 21547 21623 22026 21920 22368 21771 21721 21305 21732 21591 21748 21603 21928 21780 22117 21552 21713 21207 21734 21547 22208 21810 22299 21875 22150 21632 21574 21319 21781 21511 21830 21539 22028 21653 22188 21863 22281 21896 22326 21908 22332 21897 22285 21945 22384 21904 22045 21575 21785 21408 21610 21401 21613 21283 21708 21399 21702 21435 22212 21424 21863 21441 21783 21455 21984 21792 22327 22167 22407 22168 22248 21249 21001 20718 20840 20649 21037 21131 21592 21927 22304 22281 22649 22618 22894 22677 22955 22720 22720 22459 22723 22470 22541 22278 22617 22422 22462 21975 22230 22021 21477 21472 21600 21414 21590 21615 21536 21544 21385 21509 21475 21484 21408 21595 21447 21528 21784 21547 21476 21767 21733 21616 21644 21751 21778 22007 21948 21893 21856 21833 21635 21769 21506 21778 21361 21451 21344 21690 21456 21849 21512 22039 21649 22139 15072 17883 18428 19193 19223 19604 19570 19821 19742 34332 24898 23384 22240 22341 21753 22144 21443 21995 21619 22123 21785 22224 21376 21607 21462 22096 21958 22103 21328 21677 21398 21968 21815 21906 21243 22153 21915 22054 21270 21804 21699 21969 21336 22199 21852 21616 21614 22176 21317 21956 21827 21840 21308 22096 21580 21717 21863 22071 21492 22092 21414 21957 21964 21659 21607 22034 21365 22350 21270 21824 21784 21707 21917 21750 21542 21905 21543 22229 21366 22089 21168 22327 21357 21860 21442 22029 21831 21665 21754 21655 21859 21864 21098 22023 21496 22295 21281 21809 21688 21563 21952 21557 21476 21989 21355 22691 21083 21970 21589 22120 21654 21436 22069 21300 22161 22257 21223 22129 21073 21900 22408 21109 22145 20950 22130 22306 21090 21988 21515 21294 22776 21175 21320 22496 20663 22862 21399 21589 22358 20797 22560 21961 21095 22282 21348 21497 22888 21143 21561 21981 21499 22102 21692 21724 21967 21550 21683 22102 21554 21952 21994 21365 21751 22138 21594 21451 21930 21836 21514 21940 22004 21397 21665 21867 21643 21525 22184 21397 21763 21673 21830 21431 22119 21913 21568 21552 22023 21572 21603 21897 22136 12302 18122 19501 20016 19619 20536 20643 20526 20231 20588 26299 23638 22201 22810 22167 21889 21529 22040 21778 21608 21659 22379 21600 21714 21504 22093 21751 21702 21413 22264 22036 21946 21335 21992 21428 22144 21223 21810 21817 22252 21081 22077 21338 22108 21629 21589 21464 22343 21840 21741 21252 21847 21792 21920 21335 21888 21704 22394 21751 21717 21393 21249 21536 22175 21509 21658 21371 22097 21925 22280 21418 21576 21316 21976 21687 22071 21486 21542 21399 21920 21977 22229 21490 21632 21412 21824 21704 22205 21632 21612 21303 22096 21974 22187 21357 21564 21782 21849 21671 22140 21577 21416 21408 22224 22295 22552 21367 21187 21152 21011 21989 22468 21460 20889 21213 22580 22694 22368 21191 21083 21178 21632 22125 22351 21242 20840 21028 22223 22744 22766 21501 21427 21739 21653 22185 22258 21239 20835 20828 21896 22502 22930 22238 21121 21216 21320 21411 22098 22038 21902 21689 21307 21640 21872 22288 21963 21639 21495 21679 21689 21941 21951 21687 21344 21596 21771 22136 22112 21940 21527 21534 21623 21857 21826 22051 21356 21571 21469 21981 21996 22250 21832 21737 21316 21813 21521 21947 21712 22203 21512 21653 21333 18667 20243 20996 20999 20919 20576 20992 20861 21197 28775 23781 22177 22198 21911 22432 22045 22195 21241 21873 21936 21952 21639 22203 21736 21798 21298 21947 21945 22295 21860 21728 21291 21908 21415 21920 21749 22233 21608 21648 21223 21807 21780 22349 21709 21699 21431 22178 21492 21956 21793 21852 21357 21608 21780 22251 21993 22032 21254 21788 21424 22183 21704 21893 21130 21889 21721 22400 21829 21877 21363 21689 21593 21882 21673 22117 21687 21607 21455 22061 21911 22311 21728 21720 21271 21624 21431 22076 21831 22134 21701 21760 21239 21720 21779 22310 21991 22198 21360 21364 21163 21671 21440 21971 21978 22104 20992 21128 21429 22516 22651 22246 21112 21218 21280 21825 22233 22058 21064 20800 21282 22302 22796 21835 21015 21200 21333 21602 21588 22359 22273 21556 20628 20896 21211 22805 22848 22536 21522 21073 21011 21317 21440 22081 22033 21838 21664 21323 21789 22009 22186 21998 21458 21705 21738 21734 22044 21929 21623 21418 21543 21574 21936 22063 22199 21792 21629 21405 21815 21687 22000 21799 21859 21390 21691 21925 22246 21896 21565 21440 21792 21803 21826 21427 21644 21863 22337 21890 21564 21436 21856 21691 18150 20135 20811 21185 21812 21312 21266 21057 21472 21345 24226 22228 22048 21659 22354 22133 22009 21290 21312 21588 22165 21504 21690 21643 22461 21697 21753 21491 22227 21424 21879 21955 21947 21474 22039 21320 22168 21735 21746 21650 21812 21795 21875 21499 22172 21233 22356 21390 22219 21180 22299 21381 22272 21165 22376 21268 22090 21251 22273 21252 22080 21350 22296 21298 22123 21219 22300 21287 21998 21280 22272 21360 21872 21392 22066 21504 21783 21434 22070 21568 21899 21525 21961 21560 21843 21773 21700 22023 21558 21466 22238 21596 21507 21745 21495 22347 21403 22296 20773 22864 21163 22134 20943 22631 21434 21430 21941 21523 22656 21347 22288 20768 22392 21889 21443 22230 20829 22599 21335 21241 22451 20736 22389 21661 21511 21958 21450 21913 21914 21488 21592 21862 21300 22053 22033 21611 21672 21988 21423 21831 22102 21607 21578 22054 21401 21863 22129 21806 21646 21861 21893 21528 21733 22256 21550 21665 21565 22180 21408 21788 22007 21955 21330 21779 21741 21920 21261 21975 22039 22051 21239 21818 21483 22183 21587 21694 21745 22375 21692 21609 21541 21892 21745 21976 21248 21798 21781 22360 21653 21721 21293 21863 20884 21469 21101 21715 21667 22177 21473 21563 21232 24115 22322 22284 21253 22071 21847 22342 21664 21718 21340 21846 21595 22125 21385 21586 21355 22058 21980 22332 21672 21578 21475 21898 21559 22113 21847 21888 21312 21735 21633 22345 21917 22144 21415 21551 21591 21874 21803 22301 21536 21125 20930 21745 22468 23024 22379 21159 21192 21623 21397 22140 22333 22321 21139 20852 21090 22028 22528 22900 22605 22180 21263 21405 21161 21479 21607 22349 22347 21889 21024 21372 21551 21666 21869 21929 22182 22075 22120 21703 21517 21485 21810 21894 21664 21646 21899 21859 22030 21804 21888 21664 21652 21440 21462 21326 21689 21756 22160 21958 22277 21977 22203 21993 22101 21799 21860 21415 21674 21220 21735 21361 21810 21479 21900 21555 22113 21698 22202 21782 22098 21554 21769 21290 21652 21129 21762 21431 22061 21792 22409 21930 22249 21760 21997 21504 21741 21326 21705 21361 21840 21376 21860 21488 21956 21447 22007 21729 22082 21831 22161 21680 22093 21575 21753 21253 21771 21580 21968 21689 22144 21898 22226 22024 22391 21954 22212 21785 21949 21435 21681 21453 21797 21675 21685 21648 22094 22016 22375 22148 22116 21429 21205 20660 21297 21552 22213 22316 22823 22785 22777 22176 21779 21003 21152 21018 21402 21287 21533 21591 22169 22279 22400 21717 21230 21358 21399 21447 21484 21877 21890 22113 22135 22273 22105 22112 22036 21564 21434 21640 21632 21789 21603 21768 21709 22058 21888 22075 21794 21746 21376 21580 21433 21993 21962 22314 21847 22189 21560 21735 21313 21688 21505 21607 21518 21768 21501 22032 21690 22160 21723 21994 21489 21682 21154 21680 21415 22027 21861 22339 21872 22264 21368 21648 21194 21867 21248 21798 21561 21961 21776 21945 21441 21865 21188 21831 21357 22119 21730 22421 21789 22263 21520 21800 21216 22109 21451 21883 21670 22183 21877 21966 21379 21624 21305 21662 21749 22248 21931 22317 21816 21928 21123 21358 21103 21555 21176 21594 21363 21960 22001 22507 22296 22522 22241 22108 21635 21351 20800 20864 20707 21979 22029 22512 22529 22849 22790 22902 22619 22642 22192 22131 21792 21596 21476 21396 21520 21571 21717 21469 21638 21652 21624 21562 21681 21770 21964 21893 22012 21890 21785 21285 21564 21625 22145 21656 21659 21543 21854 21911 21851 21312 21761 21949 22251 21907 21644 21524 21811 21846 21882 21240 22029 21977 21992 21312 21906 21728 21607 22019 21648 21504 22100 21413 22201 21257 22173 21632 21723 21594 21685 21955 21881 21312 22307 21423 21986 21874 21749 21750 22323 21254 17381 18241 18946 19287 19696 19394 19975 19205 20489 28584 24680 22792 22673 21893 22130 21993 21866 21496 22274 21609 22292 21412 22026 21480 21911 21985 11897 17510 20016 19901 19941 21256 21096 19859 20308 20961 26522 22455 22616 23153 22862 21213 21376 21385 22161 22315 21935 20873 21077 21796 22766 22723 21582 15686 19329 20001 20743 20898 21143 21315 21293 21309 21048 24348 22517 22096 21752 21764 21822 22129 22048 22189 22080 22320 21936 22229 22090 22272 22023 22268 19497 21024 21368 21591 21445 21841 21560 21933 21632 30158 23411 22936 22295 22370 22020 22248 21838 22102 21904 22104 21598 22007 21617 21860 21220 21585 21287 20612 20960 21617 21424 21857 21626 22009 21574 22107 23817 22498 21725 21973 21563 21972 21417 21730 21345 21704 21542 21968 21510 22193 21870 22364 21945 22220 21876 22168 21650 21853 21244 21671 21253 21729 21751 22089 21684 22041 21509 21866 21432 21379 21328 21638 21269 21596 21504 21985 21892 22699 22461 22608 21929 21495 20677 20906 20845 21133 21745 22482 22043 21893 21249 21670 21115 21089 21297 22145 22693 23013 22427 21935 20924 20855 20769 21745 22322 22445 22065 21553 21108 21376 21447 21410 21868 21879 22040 22060 22145 21878 21697 21485 21504 21529 21904 21890 21997 21543 21819 21543 21637 21390 21673 21409 21981 22011 22277 21786 21803 21384 21536 21523 22025 21850 21867 21498 21760 21370 21715 21336 22096 21959 22260 21632 21643 21327 21992 21805 21959 21531 21943 21305 21808 21704 22421 21833 22026 21233 21728 21671 22102 21466 21493 21095 21773 21769 22436 21564 22027 21249 21703 21522 22261 21376 21837 21259 21885 21994 22272 21436 21656 21412 22080 21668 21911 21395 21644 21293 22084 22052 22219 21504 21481 21330 22055 21743 21889 21434 21837 20968 21566 21863 22648 22747 22213 21413 20797 20746 22083 22277 21952 21248 21288 20979 21577 22452 22946 22268 21398 20673 21200 22176 22501 21793 21521 21084 21187 21128 21955 22183 21763 21602 21275 21606 21719 21952 21661 21670 21509 21509 22036 22192 21981 21927 21462 21563 21660 22060 21671 21794 21447 21435 21776 22220 21936 21813 21345 21636 21889 22019 21589 21677 21312 21742 21747 22369 21735 21811 21305 21626 21546 22223 21693 21827 21490 21606 21305 22184 22003 22099 21732 21764 21163 21963 21715 22072 21533 21696 21302 21785 21896 22311 21753 22078 21184 21840 21684 22128 21352 21747 21261 21923 21838 22354 21651 21955 21244 21697 21696 22042 21468 21956 21161 21803 21891 22313 21657 21706 21281 22091 21768 21961 21795 21668 21739 22442 21835 21557 21146 22005 22088 21836 21274 21144 20997 21968 22737 22474 21137 20848 21577 22534 21905 21383 21137 21303 22528 22770 21862 21001 20763 21780 22292 22080 21256 21428 20877 21816 22167 22082 21952 21353 21530 21792 21970 21736 21581 21716 21693 21490 21888 22031 22132 21642 21438 21497 22055 21899 21880 21472 21670 21926 21632 21343 21639 21575 22179 22023 22312 21860 22040 21529 21509 21287 21638 21584 22095 21648 22061 21762 22161 21703 22148 21690 21993 21702 22096 21772 22191 21569 21826 21376 21588 21268 21709 21611 22272 14723 18669 19096 19735 19250 19874 19596 20140 19991 20346 25364 23581 22691 22971 22039 11875 18028 19993 20077 20934 20528 20737 20217 20859 20785 27093 23720 22665 21956 22172 21960 19129 19765 20889 21143 21048 21018 21440 20717 21713 27092 23553 22272 22933 21255 22099 17978 21952 20344 21959 20999 21268 21160 20611 22432 21140 23728 22296 22076 21842 21012 20692 20282 22122 20955 21836 21188 21136 22230 21032 21582 22664 22454 21639 21897 21626 22020 21664 21737 21671 21984 21794 21408 21994 21509 22080 21461 21614 21677 21754 21892 21959 21838 21493 22212 21373 21938 21379 21995 21815 21896 21681 21702 21584 22179 21376 21863 21504 21928 21687 21761 21674 21789 21443 22311 21193 21788 21739 21632 21527 22292 21373 21810 21777 21649 21510 22363 21392 21969 21451 22145 21364 21696 21787 22263 21580 21689 21302 21821 21533 22242 21558 21723 21131 21831 21640 22256 21891 22102 21615 21686 21259 21703 21534 21825 21452 21903 21591 22080 21705 22045 21762 22021 21443 21776 21330 21659 21250 21655 21443 21767 21481 21827 21640 21534 21484 21632 21330 21361 21238 21509 21121 21097 20954 21387 
38436 40752 38405 36864 39741 38861 41321 33457 42596 37760 41541 37591 41186 39175 40263 41192 38296 43033 33685 36029 41285 36968 42603 43140 35033 37738 37344 42368 43329 37056 40858 38854 37297 40678 37138 32597 36808 37972 37296 42288 33748 34326 38519 37466 42180 36183 35440 40870 35693 33952 35593 34032 37456 35924 39703 33360 35105 40038 35777 33427 40347 36413 41611 37354 40008 34272 33548 40993 36208 32937 36401 33207 38503 34645 40375 33796 36853 41841 35756 40248 34279 41965 40512 37483 40935 38212 41972 36055 40055 32940 38537 40144 34197 40393 35702 34364 42657 43024 36439 33351 38075 33717 38741 35361 39681 36451 40048 35297 37376 42201 36060 40420 37802 34886 35856 33856 38103 39284 34005 37664 41456 41568 35277 34536 37717 35281 38358 35618 35473 43272 36055 43296 33992 41098 34775 42678 43688 38613 41013 38760 42848 42795 34120 41877 34123 34312 32873 33015 41484 33076 42503 43154 42095 34348 42369 33309 35766 33437 42469 36147 35589 34021 34336 35830 35816 38688 38022 37291 36744 36621 34312 35719 32598 35638 41414 42784 41461 35312 42240 37094 32814 38720 34541 40032 36608 35466 41003 39328 39424 33287 32693 35686 34826 37442 38068 42860 41184 42240 36152 39722 42546 38848 34409 39813 36180 40660 41568 34480 42467 39555 38126 39709 41120 35243 41767 38183 36576 37280 40608 40247 37751 39015 40612 36472 35136 37986 41277 40914 37040 34102 34221 40000 41209 38119 36579 36509 40982 39477 33911 35287 37035 39291 42971 39721 42187 38272 38168 34848 34144 38488 41739 42449 40754 36499 35921 35335 37574 35856 33240 37127 33429 40789 41856 39628 39516 42101 41915 37108 42240 39031 36784 34669 35788 34656 36864 36902 38943 38759 43022 41860 40784 36448 34950 33603 37609 33545 42471 38656 41728 35602 38711 38161 33965 39579 34696 42212 39446 40885 40270 41346 40512 39992 38567 37447 42567 39245 39980 37362 39858 41621 38874 38421 33077 40726 36567 39734 41153 43672 34490 37304 41961 34135 42100 35872 33619 37900 38968 41423 41528 43289 37840 39392 33714 38278 43203 39836 35276 35402 38272 33558 34849 39444 33480 37559 38490 41718 36181 39970 34112 42440 37952 36720 32904 37562 38533 41943 34905 37065 34550 32964 40154 42003 35987 34825 36480 42338 40109 37638 33472 33074 38512 33646 33941 37165 39900 27209 37524 32217 37401 33488 32301 33544 32325 39846 33389 43265 35824 40648 36839 40300 37253 33163 38554 35897 34035 34648 42436 34112 35152 32489 39352 36038 35168 41971 41538 38882 37984 41418 38565 42198 39968 40448 36448 36448 41200 38837 39473 41432 39848 34692 33831 42354 42378 36759 35816 40151 37073 35952 37335 41392 37200 35168 42552 36193 35376 41609 40493 33217 40352 33013 34465 41696 39627 37781 41244 42304 33897 40834 38344 35216 39216 43080 33600 41810 37610 38320 41014 43008 34416 41797 36548 35127 40722 34291 34096 40879 39477 38343 40617 41837 33874 35821 36796 34921 39944 33889 41818 42040 40946 41784 33888 41589 39968 39347 37999 38486 43301 42789 36779 40240 34216 35296 42028 40133 38913 39788 34268 39852 42464 40682 36123 37895 41149 36192 36402 43112 42534 35962 34572 40376 41344 40691 36131 35891 37173 43764 38204 41204 39079 40042 41170 42245 39661 38922 37525 35107 40968 34528 36848 41200 38360 34574 42944 35420 35023 37776 38195 35194 41090 34228 35840 39856 39616 37852 33232 33098 34248 36730 36413 38915 41623 33893 42635 38698 38596 41285 36709 35661 40880 36588 32908 37856 35191 40684 32973 34417 41138 33693 39960 37620 37740 37004 32884 37175 36438 39977 38958 37307 40280 40777 37742 42791 39239 40664 40618 37239 37536 37800 34543 40656 35720 36141 40704 38208 37976 41632 37073 35381 40784 37510 42196 37632 35864 40968 34250 34211 40181 36684 35891 42166 35634 35095 42260 40441 43048 38184 36105 36841 41644 34310 35783 41265 38668 38593 40368 36272 41942 40747 35322 37169 39107 37210 35501 42272 36811 37184 41608 35315 33888 37120 34880 39654 35248 34162 42552 39458 37685 41800 35576 35286 40544 34508 42231 39524 36824 39946 35336 35456 40432 35528 35909 41611 38748 40676 41561 41753 39844 35063 42024 38423 38348 39545 37461 39019 42381 44130 35488 41059 39116 40151 40585 36620 41024 39193 38416 35411 40503 41864 36740 36710 37920 39781 41399 34200 33685 42177 41352 33597 33344 36243 40160 36780 36929 33389 32706 38240 37856 41140 42357 39463 38760 36864 34544 41107 36416 38672 40542 38785 42541 35495 35619 35554 38818 37776 34507 41960 33671 33543 37463 39328 40833 36110 34487 41937 36746 35138 38296 36371 36923 41846 35442 37600 41184 37363 33754 41970 36185 36333 36397 42162 34743 37024 41872 37299 33664 42135 36972 35204 38135 39270 35884 39609 36419 40744 40552 38427 42586 41571 42071 41088 38929 34896 41965 40170 38823 40842 41113 34005 40066 32727 34905 34462 43267 35322 35829 42858 41200 42197 37576 38000 38059 42679 39155 41123 40352 35879 35680 34375 36186 36137 37098 43143 40576 40438 42272 42151 41170 39942 41776 41920 41249 39854 42504 40668 39585 40394 41280 40407 39255 41564 41632 40991 40108 40320 41720 41046 38816 40530 41172 41586 37159 41595 39254 32694 35928 42228 39431 33552 37261 33080 37920 33495 36590 35969 35059 38582 33627 42421 41447 34217 32668 35462 43013 42457 42320 41674 35446 37088 39602 40086 37484 34916 42160 42511 38080 33139 34528 41271 41413 35154 42485 37314 42368 41216 36216 34418 41216 40656 43365 34828 42521 35072 32885 37840 42471 37777 37536 42740 34140 36864 40780 39168 38728 34397 34638 38203 42423 36954 39544 34373 33626 38823 41998 37349 39830 36536 34576 36896 37224 33040 35440 41016 33692 34521 33607 40128 41924 36338 38712 38055 41161 36160 35793 37330 40546 38514 38961 39020 40603 36680 42917 40783 34056 35117 35621 42433 35360 34118 33152 36967 35680 38100 40099 36368 35981 42096 34824 35381 40864 37286 36352 42752 39281 35513 34711 40133 42773 33995 40000 40905 41907 41585 40526 39482 37028 42016 34775 35319 41288 36984 34101 39825 41848 34001 41472 39245 38437 42020 34987 33646 42557 37545 33674 39469 37001 36984 40796 35912 34202 41936 37876 39780 42306 33908 33869 36908 36368 41632 33249 38864 36983 35714 43188 39269 42696 39801 39896 34589 41755 40288 42242 41956 39408 36208 38632 38776 33320 37540 34550 40149 40752 42248 39794 43046 34565 42118 42425 37312 37765 41775 33873 34520 37105 37725 40441 39512 39809 35426 32983 42752 36496 37138 34563 34480 37304 36976 38784 36363 36952 34531 34364 41965 42848 41556 35321 35876 39907 38160 41329 38472 40848 38651 39633 36416 36851 42136 35104 40000 35896 41472 36473 42865 37597 33520 39449 35164 40569 36153 39363 33472 35672 40673 34666 39008 35755 42306 39456 36075 42624 37936 41255 35712 38554 32643 35616 41187 35454 41443 36715 41392 37079 42712 38168 42579 38997 35584 39141 36791 40049 34903 39464 33922 35735 40244 36108 33767 37835 35143 39665 37430 40832 38696 42808 38128 40704 36224 38017 42456 35128 42496 36464 34926 34939 34256 39434 38440 42589 40141 39763 42374 40227 34082 40631 33466 40625 41957 37173 36275 36466 40100 36083 37712 39227 37990 41984 41066 33516 33883 40137 41523 42567 35651 40304 41810 42215 42791 43196 37504 37128 39624 40186 41272 39810 39626 38784 33717 42113 34589 33994 36064 34051 35608 35346 38966 37073 39363 36147 35641 41305 34013 42149 38712 38156 41772 37106 40615 33629 35575 40832 35173 32620 34080 32909 35554 43075 38800 35174 39865 35699 38409 42889 35152 39220 34891 42061 38997 37103 41984 37149 41299 41792 34583 39749 37276 40091 36352 33559 37936 35790 37856 42272 37271 39707 36832 41658 40093 35621 42752 36466 41445 33025 35977 39904 39844 42712 37637 34853 40427 37351 38222 41670 34520 40839 34998 35764 41046 38000 41927 36581 37568 39033 41752 39332 33589 39460 34083 41488 38193 38563 44000 41760 44240 41337 39831 34461 41412 35527 35928 34566 38319 38883 43793 33706 36917 36397 37792 34745 34688 40212 40040 36055 33965 42496 41993 33076 33455 35264 42680 34660 34382 34176 33431 34722 35735 38072 37296 38741 37167 36067 40656 33816 34267 39728 34662 34679 33287 36834 37557 36977 40794 35840 38024 41373 37600 34503 32839 36199 36742 37232 40359 38960 38371 38421 40882 37489 35371 34188 38400 34404 32455 39212 42186 40880 40596 40564 34312 35456 33896 34912 37856 37315 40817 41790 42653 38517 37133 35840 35769 41769 40503 40064 39127 36261 40033 34418 40775 37560 39040 32014 46976 36208 36347 35049 37174 39803 38618 37111 42912 41381 34422 41216 42176 38866 42801 37844 38323 33708 31201 37357 36769 37136 40256 38836 36206 40818 37472 45532 43784 34864 40372 37529 40240 41537 41945 40313 41988 38164 36364 38585 36202 36424 35755 33813 33034 40017 37683 34960 36448 39330 41130 41097 41296 38349 43245 44272 39643 35915 35657 36576 39805 38855 40711 39253 41721 37820 41015 39593 41130 38887 41552 32263 37543 41598 34249 42226 36866 33448 37689 34152 43648 43529 38312 41654 42504 38724 41204 36996 39584 37321 39543 34268 38648 34295 36786 40084 33931 40659 33450 37003 34179 41815 37048 34404 38571 33776 39584 37585 43632 35940 38205 33762 37920 42168 35726 41238 35346 33198 37788 32872 40251 37331 42332 38160 40916 37281 40177 34616 36904 40484 35085 40208 35605 35885 39355 35032 38766 32960 36879 42176 41972 41269 34576 40408 34178 32423 38050 37165 35616 43353 34611 37639 43127 34524 36592 36194 39176 35771 43316 39260 37377 40183 34935 39072 38730 40808 40006 35572 38985 43116 38275 37056 36352 35029 35560 41628 43468 39360 33500 38837 41488 42752 42176 37312 37320 38742 39160 39974 37346 35095 42864 32888 32912 36996 37088 38643 33504 36439 33377 34230 41697 35088 41776 38640 38872 41376 36259 36355 41567 33265 32832 38432 36907 37168 43024 35826 41635 35589 41108 39466 38248 41320 34359 34442 41227 38539 36480 38128 33323 37808 40977 36318 35096 42712 36908 38664 40334 35501 34829 39464 42779 43395 39208 36096 35800 42836 33927 38618 40231 35460 32835 41160 41604 37018 40464 37552 38503 41088 42563 34823 41805 39300 34824 37480 41841 34721 40810 39392 38984 41040 32812 42586 41364 39289 36067 37060 42307 36993 37389 33728 36928 34902 36128 40749 42277 35885 34791 39184 41379 37984 40093 40796 37808 33760 42904 38384 41564 42115 34323 39590 40240 43932 36400 32902 38516 39826 39106 38071 40587 35929 33937 40512 34289 35392 37701 34857 34713 32724 32611 38448 40419 38600 37850 42633 33974 34524 38967 35030 35972 42448 42663 35995 40816 37783 36478 41272 34464 36984 38545 34007 34916 40694 35984 35733 42202 35994 36364 40931 34599 33208 40896 35430 36492 42769 34424 40818 40502 38757 39628 35649 35651 39539 38275 35432 39079 33417 34796 40774 36214 37141 41786 36148 39378 39659 36643 34897 39612 41523 36034 40482 37751 36820 42064 34824 37911 40528 35209 34856 38750 42772 38144 39567 36465 37186 41734 34912 35179 40463 39667 35874 38056 36147 34656 35673 42973 37032 33544 39130 38707 39389 36806 40544 39345 37717 37973 35948 43367 39419 36064 33684 33287 37168 41776 39325 41108 33410 36155 36981 37676 35200 35771 41298 39312 40368 42295 36705 36331 40289 39364 37894 41552 33372 35776 38026 35623 33848 35136 35144 42704 37216 38913 39949 34596 42315 43287 39385 37526 37184 42512 35074 37497 34165 41424 34704 33683 40199 38828 41706 37104 38758 33239 32663 40595 34546 33517 39508 34445 39069 35724 40016 35461 39845 35227 38410 35277 39218 35986 40672 33720 36280 41330 34016 40257 35589 34248 40870 32933 33353 37703 34822 39341 36297 33155 39012 37696 41485 43168 35238 35331 38566 38962 33458 36787 37536 38694 37099 32260 34427 39993 36523 35276 41440 36554 35063 37825 40346 38022 38538 35200 36450 39323 38271 37888 42166 35098 35185 41293 34537 40873 38264 40459 39700 36441 37736 41316 38328 37829 40415 39556 33482 42551 39399 36456 41418 39469 36770 37685 34352 40501 39951 37577 36677 39680 39075 41080 38135 33996 34800 43100 34777 37224 34403 38365 34565 35584 34843 38086 36087 41817 38680 32961 38902 42691 34625 34916 35799 37066 38081 36822 42967 40926 42059 37946 41649 38816 36611 37170 34897 35108 33568 40195 41552 37326 32589 37421 35145 35600 34793 36112 42312 42019 40091 36261 35736 34072 33056 41133 42064 36507 35819 34405 32722 42148 41832 38310 42633 40108 41699 35191 36098 41408 34007 34952 40823 36800 33302 40821 33705 35425 39141 36805 34332 40968 37380 39568 34576 34907 40358 35469 33209 36274 42439 37812 34093 38962 35361 38913 35720 38514 42418 35984 41052 34960 40064 34873 42240 36152 42810 36832 34358 33173 42672 34419 41011 41712 40649 33072 38743 38947 37412 41865 
22904 22707 22400 22197 22976 23120 21937 22696 23895 22717 22278 22411 23177 22860 22048 22265 22850 23290 22597 22604 22664 22890 22857 22833 22435 22695 22948 23212 22851 22557 22706 22713 22727 22971 22719 22627 22357 23008 22929 23164 22620 22735 22263 22787 22438 22807 22674 23129 22650 22866 22325 22630 22255 22943 22689 23269 23020 23254 22488 22729 22136 22779 22181 22792 22435 22956 22603 23081 22631 22929 22216 22605 22198 23012 22585 23190 22844 23303 22897 23197 22671 22942 22212 22512 22435 22935 22341 22789 22373 22966 22466 23096 22565 23281 22599 22961 22394 22737 22207 22600 22231 22636 22306 22784 22552 22850 22677 23144 22857 23141 22920 23287 22808 23071 22738 23153 22558 22569 22200 22391 21835 22159 22149 22420 22198 22615 22663 22477 22263 22628 22530 22912 22893 23175 23040 23149 23121 23398 23242 23370 23298 23324 22997 23173 22957 22939 22384 22521 22358 22884 23143 22976 23052 22961 23107 23010 22969 22855 22940 22644 22796 22609 22629 22413 22834 22693 23169 22832 23257 23003 23255 22961 23344 22936 23330 23019 23392 22617 22880 22600 22861 22429 22767 615 13913 14534 15529 15367 15845 15691 16170 15959 16462 28423 26100 24730 24742 23975 24239 23543 23680 23036 23296 22853 23400 23112 23788 23192 23225 22609 23672 22854 23421 23032 23014 22619 23289 23197 23271 22493 23122 22775 23353 22413 23239 22967 23079 22540 23065 22913 22926 22827 23412 22366 23031 22836 22914 22469 23431 22587 22912 22716 23087 22587 23463 22291 23037 22660 22870 22957 22773 22487 23271 22261 23348 22440 22852 22823 22873 22951 22668 22665 22872 22614 22989 22503 23123 22487 23350 22483 22983 22458 23018 22848 23023 22814 22613 22952 22643 22512 23237 22281 23296 22432 23368 22807 22571 23017 22384 22564 23040 22304 23707 22385 23196 22138 22848 23363 22325 22985 22633 22482 23761 22011 22748 22663 23024 23220 22422 22877 22735 22147 23830 22076 22415 23203 21835 23495 22832 22238 23404 21948 23379 22745 22328 23090 22319 22564 23712 22050 22395 23232 21973 22989 22856 22045 22736 22685 22523 23143 22365 22700 22776 22535 22682 23097 22328 22614 22786 22618 22488 23097 22589 22731 22592 22983 22235 22935 22917 22629 22383 23048 22348 22735 22913 22698 22494 22806 22681 22537 22540 23232 22393 22986 22377 15345 16194 17322 17634 18057 17554 17984 18030 18382 17771 25922 24647 24064 23342 23688 23405 23560 22678 23767 23068 23066 22917 23330 22922 22956 22596 23389 23015 22943 22556 22976 22665 23289 22551 22816 22909 23333 22365 23063 22560 23337 22549 22821 22471 23364 22852 22713 22371 22934 22695 23190 22151 23079 22890 23170 22400 22859 22748 22901 22688 23159 22288 22665 22481 23350 22789 22887 22213 23030 22426 23078 22708 22777 22182 22798 22726 23234 22786 22822 22357 23174 22419 22928 22752 22768 22183 22631 22568 23152 22849 22864 22217 22829 22465 23033 22753 22766 22212 22692 22692 23314 22856 22597 22119 22705 22396 22999 23018 22979 21781 22264 23035 23761 23239 22279 21885 22872 22472 23205 23147 22349 21635 22405 23262 23809 23364 22433 22027 22478 22304 23200 22937 22261 21660 22287 23291 23723 23436 22717 21954 22296 22365 22534 23276 23034 22276 21705 22327 22487 22948 22862 23029 22368 22415 22613 22727 22697 22959 22385 22371 22457 22987 22963 23050 22490 22353 22364 22574 22484 22819 22785 22698 22208 22800 22824 23150 22575 22786 22193 22550 22453 22663 22550 23025 22517 22565 22156 22664 22582 23168 22722 12231 17540 18663 19147 19275 19064 19749 19358 19559 19096 26272 24233 24145 23168 23200 22752 23219 22744 23424 22791 23046 22297 22901 22744 23316 22938 23313 22312 22774 22532 22867 22687 23161 22579 22784 22151 22888 22583 23268 22742 23208 22293 22769 21747 23006 22581 23140 22280 22685 22197 23094 22800 23138 22475 22593 22342 22814 22393 23194 22568 22593 22411 23055 22776 23151 22279 22633 22226 22810 22502 23005 22626 22775 22176 22641 22476 23118 22734 22720 22194 22589 22353 22734 22698 23086 22418 22508 22133 22750 22652 23147 22887 23150 22318 22460 22272 22951 22337 22927 22703 22955 22323 22123 21928 22652 23281 23546 22668 22179 21940 22458 22478 23152 23130 22413 21627 22550 23289 23776 23100 22318 21860 22401 22500 23101 23045 22507 21685 21796 22151 23164 23634 23525 22768 22404 22008 22487 22315 22930 23172 23104 22065 21681 22551 22552 23010 22897 22876 22167 22631 22700 22710 22786 22652 22226 22380 22551 22951 22893 23005 22599 22607 22200 22480 22471 22695 22556 22944 22251 22400 22378 22962 22677 22997 22374 22398 22750 22759 22571 22928 22195 22925 22790 23104 22391 22537 22756 22650 22560 22880 22157 22680 19147 20623 20161 20306 20346 20858 20619 20876 20184 29182 23647 23910 23041 22984 22512 22962 22632 23175 22324 22666 22659 23243 22567 22622 22231 22933 22574 22615 22583 23321 22178 23287 22597 22750 22557 22981 22400 22839 22283 22876 22717 22632 22631 22567 22725 22551 22317 22739 22592 22882 22244 22743 22541 22796 22237 22908 22492 22897 22303 22824 22442 22912 22342 22796 22572 22755 22327 22855 22561 22934 22259 22944 22208 23088 22156 23040 22213 23158 22284 23006 22062 23162 22041 22968 22097 23466 21920 22917 21762 23494 21911 23209 21648 23770 21823 22840 21895 23448 22351 22424 22920 23113 22940 22583 23201 21803 23658 22016 22656 22385 22695 23424 21980 22962 21947 23088 22800 22260 23232 21770 23154 23055 22468 22656 22560 22458 23031 22205 22679 22677 22515 22824 22631 22472 22605 22712 22387 22672 22883 22172 22536 22621 22440 22688 23077 22205 22599 22560 22662 22250 22968 22577 22540 22304 22957 22387 22535 22612 23217 22103 22189 22428 22921 22041 22735 22743 22896 22061 22585 22321 22963 22275 22584 22401 23194 22523 22556 22057 22711 22535 22663 22028 22839 22611 23084 22226 22694 22144 22794 22502 22901 18792 21633 21528 22027 21184 21725 21351 21948 21780 21572 23033 23248 22894 23238 22179 22941 22256 22897 22610 22912 22136 22592 22659 23175 22694 22826 22240 22748 22322 22707 22572 22788 22214 22409 22220 22930 22802 23040 22397 22496 22119 22581 22393 22964 22622 22716 22090 22412 22790 23633 23300 22761 21927 22109 22407 22698 23117 23144 22044 21760 21750 22720 23175 23729 23067 22483 21885 22167 22125 22349 22381 22966 22936 22394 21745 21773 22279 22921 23406 23338 23033 22650 22585 22220 22395 22519 22574 22345 22695 22784 22877 22561 22593 22268 22342 22139 22528 22450 22861 22792 23088 22798 23040 22752 22895 22227 22457 22088 22593 22466 22880 21644 22663 22294 22672 22296 22803 22459 22966 22536 22956 22401 22540 22006 22548 22121 22744 22329 22868 22507 23100 22728 23173 22671 23008 22364 22680 22101 22624 22313 22805 22194 22722 22244 22855 22391 23109 22512 23063 22464 22840 22103 22594 22011 22571 22092 22730 22224 22838 22522 22994 22617 23189 22755 22932 22313 22580 22172 22550 22149 22511 22366 22793 22093 22933 22256 22736 22374 22808 22555 22870 22416 22557 22184 22167 22012 22344 22512 22992 23211 23696 23500 23462 22378 22311 21888 21995 21948 22198 22162 22444 22715 23201 23081 23191 22364 22146 21792 21681 21975 22776 23023 23453 23566 22889 22957 22703 22659 22147 22328 22298 22469 22328 22541 22323 22608 22713 22880 22722 22835 22364 22496 22174 22487 22217 22765 22644 22957 22676 23194 22613 22754 22032 22728 22611 22669 22311 22801 22544 22969 22576 22821 22409 22643 22146 22528 22071 22767 22291 23030 22693 23146 22697 23047 22455 22643 22080 22520 22408 22696 22196 22960 22571 22977 22505 22625 22116 22479 22095 22698 22663 23166 22682 23172 22472 22732 22119 22561 22213 22730 22212 22743 22569 22955 22255 22542 22111 22532 22339 22853 22671 23136 22705 22920 22557 22524 22244 22770 22469 22704 22401 22921 22647 23053 22626 22919 22484 21970 21597 21877 21958 22442 22585 23125 23061 23490 23544 23561 23285 23237 21888 21969 21927 22024 22109 22336 22412 22750 22236 22327 22423 22528 22710 22649 22897 22702 22861 22484 22697 22407 22488 22257 22427 22233 22300 22232 22603 22464 22912 22824 22968 22479 22451 22392 22700 22667 22595 22098 22878 22709 23066 22253 22515 22424 22702 22582 22576 22145 22829 22703 22921 22077 22751 22409 22843 22001 23060 22592 22880 22550 22503 22711 22514 22417 22583 22721 22889 22488 22873 22214 22872 22184 22921 22176 22564 22703 22643 22208 23161 22580 10982 14257 15003 15132 16277 15527 16498 15991 16512 16045 27264 25520 24470 24170 23733 23800 23728 23496 23221 23502 23096 22948 23312 22763 23613 22617 23200 15261 16791 17175 18784 17435 18071 18240 19044 17592 18220 26772 25547 23629 23770 23432 24113 23648 22668 22512 23543 24107 24131 23023 22528 22622 22180 23311 18539 19003 18705 18487 18640 19554 19558 20110 20071 29721 25015 24499 23851 23655 23344 23149 22864 23008 22989 22999 22799 23121 22956 23056 22746 23243 22828 20087 20168 20744 20565 20872 20680 21045 20667 20418 25335 24087 22979 23521 22870 23154 22620 22993 22407 22960 22487 22877 22528 23001 22720 23340 22939 20224 21693 22281 21769 22300 21799 22112 21524 22123 21527 23636 22611 22922 22455 22994 22633 23337 22856 23172 22680 23140 22559 22922 22507 23436 22517 22904 22357 22636 22269 22842 22668 23114 22773 23341 22896 23100 22628 22743 22241 22624 22317 22784 22599 23127 22865 23146 22649 22889 22535 23388 22521 22297 21921 22349 22707 23584 23778 23894 23590 23286 22452 21975 21687 22377 22901 23357 23165 22814 22272 22607 22042 22023 22302 23441 23375 23769 23335 22642 22132 21996 22660 22748 23047 22799 22832 22446 22740 22569 22592 22314 22496 22597 23046 23014 23088 22710 22876 22251 22596 22296 22901 22682 23060 22711 22855 22438 22629 22343 22608 22432 23221 22797 23248 22476 22749 22160 22845 22606 23150 22533 22904 22411 22933 22176 22743 22711 23281 22613 22846 22183 22702 22555 23130 22405 22848 22210 22707 22388 23264 22735 23024 22196 22660 22576 23085 22557 22684 22208 22632 22399 23137 22785 22984 22204 22710 22584 23068 22361 22924 22189 22833 22820 23206 22466 22477 22272 22888 22693 22820 22316 22972 22232 22952 22816 23158 22512 22627 22004 22599 22732 23155 22443 22552 22115 22317 22087 22763 23473 23802 22862 22144 21641 22815 23279 23207 22536 22455 22087 22086 22819 23748 23518 22788 21852 21818 22426 23367 23195 22670 22690 22257 22511 22702 23127 22807 22908 22413 22455 22678 22892 22542 22586 22385 22504 22279 22947 22919 23052 22279 22609 22488 22933 22546 22741 22260 22518 22447 23235 22705 22861 22148 22609 22620 22952 22401 22785 22273 22558 22400 23052 22760 23111 22265 22549 22121 23010 22598 22888 22319 22620 22098 22644 22571 23296 22609 22784 22025 22821 22543 23055 22261 22934 22192 22596 22376 23103 22761 22811 22077 22836 22538 22963 22263 22663 22092 22818 22369 23178 22789 22772 22129 22730 22716 22982 22441 22673 22195 22824 22703 23171 22560 22562 22327 22940 22579 22716 22185 22446 22806 23596 22793 22105 21776 23005 23053 22965 22279 22279 21944 23068 23619 23268 21992 21716 22425 23335 22595 22544 21943 22433 23312 23725 23197 22200 21600 22505 23081 23180 22697 22588 22422 22416 23062 22890 22857 22368 22408 22551 22765 22731 22784 22354 22574 22272 22808 22801 23155 22560 22540 22221 22597 22432 22817 22695 22927 22472 22752 22349 22811 22279 22519 22201 22767 22612 23207 22744 23187 22624 23132 22496 22909 22279 22800 22122 22560 22167 22610 22236 22737 22453 23225 22740 23162 22743 23042 22336 22653 22025 13825 14423 15385 15463 16375 15946 16300 15850 16650 31250 26740 24657 24453 23128 23939 15256 17754 17444 18036 18176 18905 18673 19013 18452 18621 26135 25064 24463 24304 23367 15255 19137 19947 19255 19881 19973 19991 20038 20438 19685 26355 23937 25044 23397 24339 22950 20456 20303 20836 21655 20571 21738 20780 21300 21017 25536 25152 22898 24194 22698 23895 20406 21756 22888 21415 22579 21302 22796 21671 22519 21494 23877 23127 23406 22742 23556 23024 23237 22658 23371 22884 23185 22560 23427 22709 23013 22930 23014 23091 22796 22901 22828 23067 22742 22721 23060 22656 23351 22394 23087 22624 23018 22979 22725 22638 23157 22516 23440 22278 23130 22538 23040 22955 22805 22426 23292 22259 23275 22811 22713 22515 23162 22314 23243 22889 22818 22449 23148 22585 22816 22722 23384 22603 22960 22343 23127 22757 23047 22286 22834 22564 23292 22876 23161 22330 22796 22543 22921 22423 23077 22640 23196 22763 23143 22434 22669 22215 22678 22408 22938 22581 23024 22855 23260 22900 23255 22893 23145 22799 22780 22364 22605 22043 22412 22493 22400 22328 22561 22625 22766 22503 22944 22985 22689 22625 
21724 22434 22011 22867 22112 22371 22023 23275 21730 22408 21930 23037 21663 22276 21960 23337 22355 22205 21783 22599 22114 22825 21479 22455 22259 23163 22248 22342 21732 22542 22094 22893 21980 22235 21649 22675 22539 23058 22084 22164 21573 22407 21912 22579 22261 22842 21970 22262 21647 22167 22113 22879 23053 23599 22631 22117 21256 21565 21345 22533 21749 22350 22665 22994 22864 22422 21175 21100 20912 21648 22509 23433 23554 23727 23142 22747 22017 21891 21220 21389 21228 21683 22259 22016 22465 22235 22696 22253 22661 22284 22482 21958 22061 21772 21839 21879 22101 22059 22567 22301 22737 22385 23060 22453 23085 22567 22879 22383 22737 22048 22592 21682 22112 21598 22133 21562 22272 21851 22588 22115 22443 21827 22472 21842 22563 21890 22811 22152 22997 22158 22764 22052 22592 21856 22540 22017 22485 21625 22340 21568 22236 21527 22193 21547 22247 21345 22185 21633 22304 21742 22418 21803 22318 21677 22656 22066 22785 22149 22908 22231 23122 22325 23009 22322 22771 22349 22821 22408 22841 22347 22788 22295 22837 22276 22845 22371 22677 22120 22600 21907 22593 22140 22669 21885 22683 21940 4493 5141 6671 7035 8219 8367 9284 30459 28426 26388 25362 23902 23589 22772 23128 23237 24035 24050 24236 23357 21565 20976 21656 21568 22878 21776 20896 20421 22087 22950 22851 20899 21217 21294 22467 21056 20613 22275 22939 20611 21072 21733 21789 20058 22310 21872 20558 21038 22247 20023 21517 22108 21064 21415 21382 21455 21165 22123 20751 21449 21281 21289 21820 21417 21066 21641 20869 21961 21207 21299 21416 21122 21797 21268 21166 21551 21140 21984 20784 21989 20738 22152 20722 21504 21314 21553 21626 21434 21270 21335 21640 21397 20983 22017 20587 22174 20961 21933 21417 21272 21585 21465 21047 21979 20688 22264 20820 21857 20917 21739 21469 21463 21207 21833 20871 22349 20615 21697 21255 21635 21565 21437 21168 21762 20983 22336 20864 21667 21373 21425 21529 21889 20924 22042 20882 21953 21312 21839 21226 21816 21085 22340 20864 21651 21432 21449 21527 22125 21079 22048 20814 22055 21565 21569 21017 22127 20775 22272 21581 21479 21060 22221 20935 21930 21636 21716 21177 21918 21481 21492 21717 22178 20819 21676 21473 21360 21516 22404 21024 21887 21534 21929 20819 22107 21703 21598 21351 22016 21452 5553 8371 10948 10885 12097 12616 14014 13401 14143 33127 30800 26987 26868 25830 25676 23407 23984 25024 23275 22471 23046 23474 22534 21470 23160 23918 22532 21207 22201 22130 23239 21865 21095 21736 23667 22047 21207 21797 22656 22198 20909 21377 23207 23196 21416 21025 21652 22285 22508 21295 20931 23200 22601 22064 21197 21769 21691 22319 21913 21856 21378 22016 22164 22544 21811 21636 21899 21873 21996 22242 21817 21511 21559 22369 22240 22337 21433 21728 21596 21975 21827 22322 21465 21698 21646 22272 21984 22435 21768 21622 21354 22075 21612 22462 21265 21671 21493 22379 21965 22528 21505 21712 21381 22085 21709 22415 21559 21779 21112 22283 21943 22631 21471 21854 21521 22170 21500 22487 21405 21733 21163 22408 21982 22446 21440 21863 21446 22007 21513 22464 21330 21882 21170 22546 21913 22571 21398 21872 21265 22061 21525 22286 21831 21886 21017 22016 21770 22598 22061 22385 21504 21859 21285 22099 21599 22407 21169 21860 21451 22622 22061 22567 21318 21811 21344 22045 21568 22476 21659 22018 21184 22188 22088 22653 21795 21733 21233 21938 21415 22080 21875 22472 21621 21826 21211 22183 22049 22727 21873 22105 21273 9053 11221 13592 14437 15877 15585 16168 16039 17413 18325 30567 26679 25552 24599 24561 24296 24738 23385 22377 21687 22671 23503 24262 23585 22984 21767 21859 22001 22585 22784 22732 21633 21034 21112 22443 23319 23881 23108 22455 21013 21537 21650 21906 22579 22320 20996 20941 21817 23176 23408 22664 21398 21679 22054 21776 22308 22099 22299 21536 21969 22352 22744 22231 21930 21622 22149 21789 22229 22180 22196 21609 21784 21728 22336 22337 22826 21627 21913 21634 22049 21944 22496 21969 21980 21380 22056 22135 22581 22376 22659 21792 22280 21302 22089 21573 22327 21969 22435 21635 22075 21179 22119 21913 22764 22135 22551 21396 21971 21469 22359 21744 22567 21540 21959 21488 22687 22097 22634 21403 22012 21585 22123 22044 22471 21507 21955 21431 22378 22021 22963 21952 22386 21209 22175 21621 22429 21780 22544 21744 22012 21345 22109 21959 22762 22228 22400 21515 21991 21511 22400 21831 22300 21244 22249 21796 22874 22181 22561 21426 22121 21419 22307 21607 22366 21941 22471 21646 21960 21666 22567 22236 22663 21583 21778 21646 22233 22016 22475 21539 21891 22068 22648 21644 21985 21615 22246 21900 22511 21539 21778 22144 23298 14822 15328 16359 17684 18492 18254 17494 18612 19675 29838 26904 24530 23350 24162 23670 24183 22481 21733 22860 24055 23128 21778 21608 22221 22774 22311 21259 23559 22905 21310 21690 22991 21079 22390 22720 21464 22225 21850 22446 23040 21894 22205 21890 22240 22148 21775 22255 22093 22521 21909 22500 22128 22370 21767 22480 21865 22799 21847 22511 21673 22728 21863 22585 21742 22493 21495 22595 21685 22613 21616 22551 21475 22752 21395 22439 21526 22867 21548 22442 21312 22803 21400 22336 21665 22602 21625 22401 21706 22931 21255 22484 21289 22820 21520 22423 21568 22572 21952 22451 21924 22173 22086 22086 21863 22073 22233 22024 21617 22547 21586 22931 21181 22601 21494 22596 21957 22333 21937 22208 21861 22801 21452 22489 21593 22327 22132 22023 21606 22502 21381 22979 21632 22454 21665 22549 21401 22711 22053 22132 21805 22617 21418 22665 22033 21993 21709 22615 21496 22162 22279 22226 21479 22224 21906 22148 21543 22764 22263 22098 21760 22503 21751 21813 22314 23036 21417 21607 21656 22720 21937 21049 21800 23523 23017 21504 21353 21869 22565 22144 20709 21874 23152 23320 21589 21257 21418 22055 22697 21760 20659 21677 18407 19889 18555 19201 18877 20488 21205 20048 20145 20636 25242 23909 23392 22551 22816 22584 22946 22400 22211 22016 22621 22842 22801 22062 22021 21975 22442 22016 22665 22087 22077 21602 22400 22228 22884 22380 22132 21582 22429 21632 22497 21947 22505 21749 21940 21615 22640 22266 22929 21750 22109 21381 22055 21653 22531 21808 22190 21263 22277 21956 22941 22339 22812 21704 22117 21424 22319 21683 22647 21943 22791 21688 22121 21552 22649 22011 23032 22227 22666 21776 22123 21463 22231 21447 22491 21893 22814 21980 22464 21445 22044 21395 22178 21861 22594 22176 22886 22337 22904 22101 22594 21749 22185 21428 21963 21508 22195 21650 22407 21853 22509 22080 22657 22118 22585 22054 22391 21530 21531 21042 21314 21265 22769 22933 23545 23531 23643 23149 23301 22697 22232 21312 21328 20887 21354 21513 21677 21880 22169 22431 22819 22752 22944 22273 22140 21588 21254 21143 21564 21783 21545 22213 22044 22512 22288 22669 22551 22866 22437 22656 22380 22507 22105 21817 21451 22241 21780 21874 21733 22158 21797 22323 21780 22517 21963 22651 21969 22552 21796 22277 21469 22053 21591 22304 22073 22869 22359 22928 22229 22824 21863 22357 21322 22434 21605 21625 21685 22341 21737 22701 21984 22540 21666 22226 21299 22231 21543 22348 21928 22951 22261 22818 22065 22341 21644 21952 21400 22409 21827 22438 21662 22442 21767 22671 21973 22712 21521 22132 21379 22026 21611 22418 22025 22702 22461 22829 22195 22596 21653 22033 21504 22223 21814 22439 21989 22689 22039 22303 21733 21653 21193 21442 21255 22128 22183 23200 23311 23854 23360 22784 21937 21557 21001 21239 21073 21624 21781 22306 22536 22993 22420 21763 21010 20943 20893 21677 22268 22883 23002 22670 22328 21848 22099 21572 21987 21846 22131 21944 22321 22167 22539 22171 21969 21568 22025 22043 22619 22476 22808 22513 22441 21884 21968 21400 22292 21634 22433 21975 22693 22128 22397 21693 22081 21351 22124 21409 22061 21841 22931 22149 23033 22262 22994 22135 22875 22072 22472 21597 22153 21379 22269 21637 22361 21689 22489 21718 22586 21891 22749 22027 22656 21929 22604 21725 22182 21490 22027 21334 22136 21573 22368 21709 22432 22009 22888 22069 22937 22423 22890 21600 21977 21748 22312 22084 22370 21520 22342 22220 22813 21927 22038 21810 22464 22112 22553 21317 22305 23057 23361 21296 21624 21659 22932 21281 21616 23190 22577 21411 22965 20774 23572 21368 22130 21297 23421 21044 22887 21035 22992 21157 21051 23344 21891 21945 23137 21925 22147 22478 21575 22618 1911 5776 8397 10019 10955 12201 12218 13776 13220 14397 34028 31335 29447 28060 27489 26182 25623 25044 24871 24307 23887 24148 23338 24448 22697 23594 23361 7413 10341 13524 13269 14897 15244 16633 15789 17241 35001 32523 29128 28186 26733 26829 25143 25003 24424 25155 24199 24393 22929 23937 23053 23769 23171 23713 11290 14243 15320 17163 17125 18660 18507 19216 18622 32368 28793 27730 25691 25825 24582 24892 23722 24196 23359 23881 23115 23768 22855 23567 22831 23361 13858 16268 17240 18691 18660 19697 19520 20224 19835 20593 28310 27085 25463 25196 24320 24048 23411 23508 22891 22953 22842 22801 22232 22556 21907 22104 21672 17495 18771 20220 20799 21771 21882 22552 22376 22727 22576 26553 25052 24900 23826 22764 22659 22502 22832 22645 22992 22705 23137 22730 23096 22659 22900 22528 22436 22336 22567 22262 22423 21865 22421 22022 23095 22635 23141 22853 23079 22309 22647 22023 22311 21744 22505 21751 22613 22481 22975 22169 22641 22060 22023 22038 22497 21765 22662 21812 22976 22377 23111 22356 22704 21672 22245 21837 22599 22222 22850 21991 22730 22223 22648 21501 22327 21982 23078 22443 23142 22060 22344 21659 22308 21778 22943 22103 22994 22151 22693 21769 22465 21703 22248 21764 22791 22487 22973 22290 22813 21941 22101 21617 22448 21890 22605 22103 22612 22005 22276 21872 22176 21909 22617 22683 23503 22607 22071 21153 21692 21519 22764 22807 22401 21622 21835 20918 22260 23145 23707 22855 22027 20939 21463 22583 23036 22104 21974 21409 21404 22214 23707 23361 22459 21051 21910 22616 22265 22396 21775 22370 21777 22528 22631 22568 21895 22074 22201 22621 22151 21971 21661 22144 22251 23045 22232 22537 21741 22041 22183 22629 21989 22842 21520 22365 22064 22999 22285 22645 21687 22063 21984 22988 22119 22683 21690 22577 21430 22353 22083 23212 22265 22472 21449 22349 21957 22758 21879 22537 21665 22368 21473 22919 22320 23051 21831 22137 21578 22341 22147 22632 21785 22247 21527 22399 22018 23007 22318 22574 21301 22288 22124 22646 21789 22425 21818 22017 21874 22905 22360 22449 21605 22324 22106 22844 21889 21780 21712 22100 22301 23056 22173 22397 21524 22364 22285 22974 21947 22092 21549 21293 21694 23395 23427 23373 21969 21067 21040 22582 22672 22125 21592 21952 21178 21507 23078 23729 22781 21554 20842 21927 22701 22856 21744 21826 22189 21787 22700 22508 22587 21658 21973 22273 22600 22192 22185 21968 22103 21801 22707 22589 22739 21739 21969 21876 22727 22151 22216 21544 22019 21883 23010 22229 22454 21513 22689 22085 22475 21842 22155 22095 22878 22192 22324 21459 22517 21937 22797 21700 22325 21494 22506 22380 22904 21958 22186 21621 22914 21789 22630 21479 22311 21840 23093 22281 22629 21415 22265 21986 22773 21898 22518 21372 22235 21824 23150 22210 22644 21473 22166 21548 22665 22087 22548 21871 22091 21556 22727 22496 22892 22028 22466 21739 22044 21557 22359 22148 22791 22125 22487 21836 22355 21699 22016 21293 21505 21627 22922 22406 23236 23195 23830 23607 23708 23288 23509 23448 23755 23441 23832 23333 22400 21715 21624 20905 21489 21724 21917 21883 4825 8259 10339 11041 10689 12608 13137 14477 14456 36380 32308 30693 28772 27978 26909 9977 12300 14784 15880 16938 16828 17206 16822 17974 35548 33392 30419 28552 27112 27311 13118 15713 16165 17933 18485 18842 19030 20041 19072 20055 30720 30025 27020 27200 25159 17508 17413 19467 19152 20393 19968 20430 20864 20876 20766 29601 26902 26523 24776 25909 23922 21077 20549 21648 20947 21633 21900 21741 21697 21660 26456 25225 24632 24161 24112 23745 23260 23536 23399 23281 22931 23168 23133 23238 22811 23520 22421 23653 22224 23092 22303 23392 22177 22852 22742 22829 22915 22603 22283 22887 22168 23382 21843 22761 22388 22461 23383 21804 22594 22191 22452 23919 21339 22308 22842 21315 23456 22880 21525 22336 22633 21691 23579 22933 21368 22311 23047 21537 21578 23813 22993 21614 21833 22494 22967 22280 22180 21893 22711 22727 23131 22336 22178 22041 22541 22084 22528 22617 22700 22471 22370 21938 22221 21811 22657 22221 23021 22682 22949 22565 23116 22647 22734 22071 22717 21856 22288 21773 22309 21881 22316 21915 22688 21760 22529 21864 22389 21843 22563 21879 22469 21534 22291 21616 22209 
