# Supplementary material for: An Active Feature Selection Strategy for DWT in Artificial Taste
Source: Hindawi journal article supplement (doi:10.1155/2018/9709505), 2018-01-01
Supplement: f1 [file 9709505.f1.zip › maofengTea-low-3.txt]

43478 43482 43468 43495 55 11017 17277 20600 20976 21376 21809 22531 22007 22204 22376 23000 22008 22632 22398 22842 22048 23020 22736 22626 22374 22913 22520 22601 22597 23277 22249 22688 22368 23072 22076 23074 23165 23015 21778 22984 22901 22688 21740 23077 23595 22208 22151 22871 23022 21934 22401 23933 23075 22081 22261 23242 22796 21850 23630 23333 21870 22486 22841 23296 21628 22739 23790 22756 21959 22502 23186 22512 22008 23831 22417 22382 22711 23188 21657 23272 23447 22133 22424 22946 22709 22548 23420 22372 23053 22386 23053 22869 22907 22746 22578 23041 22624 22593 22972 22829 22771 22542 22976 22545 23234 22405 22934 22344 23296 22364 22839 22688 23133 22861 23296 22721 22780 23008 22588 22544 22855 22609 22987 22765 23097 22497 23192 22501 23317 22228 23399 22212 23009 22574 23094 22712 22926 22771 22716 22904 22872 22439 23117 22540 23286 22201 23244 22127 23351 22373 23010 22679 22800 22797 22806 22418 23104 22373 23432 22178 23024 22480 22940 22745 22713 22378 23198 22136 23426 22400 22976 22602 22873 22647 23025 22293 23278 22051 23305 22722 22996 22396 22880 22733 11592 16027 18405 18819 19325 19581 20415 19382 20369 19879 29562 25785 24582 23402 24108 22754 23942 22659 23242 22957 23024 22933 23320 22503 23416 22471 23211 22915 22853 22496 23332 22305 23408 22688 22939 22765 22976 22636 23424 22355 23034 22557 22960 23004 22812 22395 23257 22213 23439 22576 22818 22848 22762 22657 23617 21913 22911 22687 22379 23650 22677 22083 23235 22226 22452 23737 22439 22127 23253 21817 23048 23588 22080 22350 23438 21848 22939 23714 22227 22708 23270 22419 22152 23753 22980 22048 23014 22962 21860 23447 23634 21901 22336 22924 22937 21760 23236 23749 22327 22283 22568 23088 22396 22914 23019 23188 22256 22869 22621 23168 22541 22739 22967 23267 22563 22621 22631 23056 22528 22992 22963 23088 22256 23110 22603 23191 22300 22716 22890 23304 22604 22705 22887 22888 22832 22898 22198 23100 22772 23406 22392 22631 22541 22896 22728 23097 22301 22877 22753 23432 22624 22759 22231 23318 22385 23188 22549 22747 22148 23108 22863 23314 22358 22701 22245 23072 22330 23159 22653 23134 22300 22725 22252 23139 22793 23466 22817 22921 22080 22861 22400 23062 22542 23316 22535 23069 21972 22826 22479 23335 22772 23167 17008 19671 20188 20987 20652 21522 21207 21768 21045 31735 24916 24571 23587 24112 23040 23114 22419 23211 22469 23239 22423 23144 22768 23315 22757 23207 22496 22912 22229 22861 22472 23320 22993 23377 22955 23232 22505 22705 22325 22738 22185 22958 22423 22988 22718 23191 22679 23143 22637 22982 22356 22621 22210 22422 22125 22756 22895 23489 23297 23847 23604 23223 22396 22273 21831 22140 22196 22683 22428 22588 22391 22548 22931 23468 22921 22664 22040 21972 21595 21937 21902 22592 23043 23696 23728 23926 23729 23760 23407 22590 22085 21987 22007 22324 22650 22368 22624 22443 22757 22540 22928 22672 22972 22775 23131 22769 22720 22401 22644 22408 22588 22295 22684 22407 22775 22553 22961 22576 23133 22895 23335 22892 23223 23045 23322 23053 23248 22823 23217 22700 23148 22470 22988 22496 22850 22116 22666 22273 22633 22217 22763 22196 22863 22127 22784 22167 22766 22059 22916 22164 22868 22176 22859 22112 22751 22180 22732 22030 22724 22093 22752 22181 22711 22114 22869 22135 22733 22097 22786 22241 22769 22190 22840 22136 22781 22159 22770 22092 22780 22106 22810 22158 22793 22409 22816 22488 23159 22391 23032 22200 23045 16709 20771 20860 21869 21274 22041 21639 22313 21718 22417 25495 24309 23348 23676 22976 23366 22800 23245 22781 22860 22326 22865 22540 22837 22368 22987 22632 23104 22646 23186 22700 23297 22800 23303 22688 22912 22204 22585 22648 23600 23623 23482 22055 22165 22743 22894 23157 22261 22113 23958 22772 22363 23177 21857 23571 22361 22455 22647 22858 23093 22337 22684 23325 22174 22712 21953 23631 22543 22384 23930 22496 22285 23676 22816 22450 22150 22093 23076 23077 23058 22886 22688 23062 22429 22654 22272 22825 22294 22679 22613 22673 22873 22913 22973 22996 22381 22648 22152 23119 22665 23216 22743 22621 22240 22957 22513 22919 22899 23118 22563 22800 22235 22851 22421 23368 22640 23284 22586 22749 22176 22799 22336 22896 22724 22933 22807 23268 22777 23145 22309 22941 22103 22865 22423 23062 22340 23438 22544 23491 22611 23156 22598 23093 22525 22907 22338 22887 22328 22720 22212 22840 22209 23063 22520 23328 22577 23536 22374 23246 22177 22745 22259 23029 22791 23019 22482 22725 22422 23373 22350 22850 22336 23289 22387 22752 22544 23225 22026 23213 22558 22705 22645 23062 22313 23008 22252 23202 22356 22887 22896 22584 22746 21031 21335 22125 21506 22738 21689 22638 21889 22690 26312 23883 22827 23371 22912 22958 23015 22770 22495 22929 22734 23252 22245 23524 21733 23834 22389 22664 23115 21893 23601 22328 22468 23450 21569 23356 23447 21925 22346 23513 21876 22766 23852 22700 22297 22695 23236 21984 23228 23674 21981 22545 22711 23189 21954 22514 23281 22727 22634 22508 23164 22391 22635 22765 23286 22637 22653 22615 22880 22813 22664 22234 22951 23056 23168 22496 22752 22440 23036 22723 22816 22222 22721 22804 23390 22737 22801 22048 23015 22428 22996 22646 23132 22593 22708 22135 22732 22461 23215 22697 23441 22817 23280 22619 23088 22369 22798 22110 22744 22135 22800 22287 22997 22374 23066 22574 23069 22673 23170 22676 23264 22579 23324 22592 23303 22512 23308 22411 23047 22448 23100 22425 22956 22424 23015 22313 23017 22516 23067 22467 23138 22499 23196 22519 23281 22609 23250 22564 23192 22426 23042 22391 22931 22347 22950 22753 22871 22313 22624 22124 22592 22213 22770 22350 22976 22735 23351 22881 23305 22912 23158 22580 22818 22464 22704 22187 22480 22393 22973 22793 23304 22794 22945 22327 22394 22176 22464 21839 22130 22314 23131 23540 22430 22824 22583 21575 21560 21665 22513 22902 23042 22521 23191 22538 22489 22179 22012 22246 23367 23621 23936 23220 22555 21733 21905 21789 22709 23104 22769 22856 22475 22809 22296 22705 22688 23185 22914 23253 22855 22788 22475 22511 22421 22982 22786 22896 22464 23120 22428 22663 22176 22821 22833 23296 22915 22904 22322 22641 22752 23019 22434 22839 22199 22877 22696 23320 22679 22963 22144 22798 22608 23109 22377 22946 22232 22976 22777 23368 22570 22869 21996 23020 22459 23023 22296 22759 22432 23368 22739 22814 22155 22965 22582 22960 22228 22934 22143 23076 22843 23332 22167 22823 22530 23062 22234 22746 22360 23320 22760 22963 22127 22983 22574 22864 22432 22701 22486 23367 22652 22898 22094 23222 22498 22964 22208 22786 22574 23385 22573 22909 22137 23010 22681 22897 22663 22694 22610 23367 22598 22695 22332 22898 22768 22867 22215 22587 22794 23354 22598 22677 22487 23111 22412 22871 22091 23048 22896 23096 22281 22580 22794 22929 22508 22096 22487 23824 23355 22388 21565 22743 23181 23096 22376 22800 22503 22563 21952 22122 22095 22692 23096 23680 23593 23851 23655 23826 23675 23813 23655 23637 23407 23968 23737 23876 23640 23837 23744 23889 23892 23483 23242 23061 23236 22628 22708 22306 22944 22508 22824 22765 22771 22295 23001 22976 22720 22673 22956 22393 22888 22696 22714 22848 22752 22801 22701 22396 23251 22263 23072 22876 22743 22366 23025 22733 23352 22464 23190 22339 23169 22286 23368 22588 23118 22279 22767 22550 23046 22817 23216 22674 22939 22220 22786 22204 22748 22240 23348 22490 23054 22120 22795 22535 23228 22679 22721 22214 22987 22364 23369 22577 22792 22038 22989 22451 23106 22660 23056 22031 22848 22264 23332 22528 23140 22389 22689 22107 22913 22512 22856 22777 23172 22608 23031 22156 22776 22338 23104 22371 23543 22551 23056 22163 22776 22261 22931 22689 23029 22456 22826 22134 22688 22368 22820 22309 22980 22391 23335 22560 23361 22643 23270 22626 23297 22684 23300 22630 23312 22598 23369 22610 23336 22487 23193 22381 23113 22410 22448 22182 22057 21859 22784 22924 23376 23586 22621 22820 22365 21687 22153 22237 23495 23083 23456 22145 21703 22062 23081 23696 22826 22394 22033 21851 23279 22951 23015 21968 22355 23684 22467 21748 22441 23040 22694 21783 22464 23440 21960 22652 22972 22840 22172 23200 22503 22473 22843 22711 22330 22888 22552 22457 22827 22819 22221 23192 22532 22716 22851 22645 22687 23240 22208 23009 22328 22721 22609 22532 22959 22926 22628 22963 22441 22855 14677 18745 18664 19919 19393 20797 19782 20663 19962 41460 26456 25070 23210 24172 22766 23510 22593 23632 22404 23228 22548 23392 22692 23170 22692 22946 22971 18038 19827 21146 20733 21841 20808 21733 21367 21654 31873 25591 23722 24011 22709 23884 22839 23197 22624 23187 22373 23527 22771 22947 22657 23192 22197 11099 19737 21361 21196 22258 21255 22450 21987 22096 21713 27444 24055 23473 23136 23733 22621 22971 22744 23313 22326 23042 23031 23168 22349 22953 22794 22955 17305 21591 22008 22132 21626 22308 22148 22583 21680 22486 25044 23720 22504 22885 22659 23432 22273 22285 23053 24032 23080 22309 22036 22566 22813 23408 22273 20228 22022 23428 23284 22391 21512 22124 22066 22608 22887 23680 22183 22092 22748 23621 23912 23439 21952 22172 22299 22568 22998 23419 22956 22496 22520 22408 22983 22866 23270 23000 23273 22777 22729 22375 22625 22592 22814 22711 22935 22916 23044 22615 22684 22353 22634 22458 23048 22766 23272 22778 22867 22336 22530 22220 22855 22429 22867 22392 23127 22727 23240 22458 22706 22234 22708 22109 23094 22689 23361 22827 23473 22775 23314 22560 23067 22337 22845 22080 22759 22244 22913 22139 22888 22296 22956 22356 22921 22336 23032 22458 23089 22387 23087 22327 23034 22565 23336 22628 23252 22610 23224 22603 23192 22564 23184 22690 23253 22538 23192 22562 23312 22554 23277 22636 23259 22600 23228 22510 23260 22582 23172 22551 23065 22457 23080 22542 23001 22536 23008 22394 22931 22409 22767 22451 22908 22368 23351 22450 22839 22329 22816 22371 22650 22145 22371 22169 22658 22753 23460 23288 23719 23560 23446 23430 23426 22560 22213 21623 21758 21858 22553 22970 23438 22800 22685 22400 22480 22448 22454 21941 22042 22218 23104 23528 23930 23650 23464 22716 22947 22367 22043 21676 21870 21888 22580 23072 22777 22954 22495 22797 22360 22516 22265 22737 22770 22866 22944 23191 22956 23129 22784 22725 22209 22630 22262 22757 22551 23044 22605 23084 22570 22825 22528 22800 22477 22821 22342 22687 22177 22774 22130 22887 22583 23266 22856 23289 22792 23207 22544 22997 22212 22697 22038 22659 22165 22799 22133 22742 22028 22661 22033 23027 22656 23364 22515 22937 22396 23142 22152 23300 22473 22980 22487 22897 22420 23360 22127 23235 22016 23388 22059 23191 22426 22795 22389 22759 22390 23209 22488 22978 22144 23129 22568 23488 22520 23316 22497 22970 22222 22752 22384 22969 22465 22668 22459 23018 22354 23170 22326 23138 22584 22595 22713 22880 22148 23127 22796 22985 22153 22728 22576 23084 22729 23127 22724 23024 22737 22755 22112 22009 21956 23477 23606 22824 21775 22587 22476 23364 22960 21821 22371 23672 23741 23504 22262 22069 21895 22484 22247 22641 22837 23207 23191 23128 22812 22884 22241 21932 21587 21792 22425 22578 23141 22939 22971 22255 22732 22420 22937 22763 22581 22391 23058 22928 22851 22322 22861 22588 22969 22392 22696 22641 23266 22450 22631 22465 23040 22501 22777 22964 22912 22263 22964 22378 23017 22809 22722 22324 22913 22354 23415 22074 22851 22492 22658 22631 23177 22033 23360 22333 23227 22063 22754 22557 23437 22432 22682 6105 17594 18901 19921 19368 20384 20138 21097 20568 21301 30247 25687 23606 23634 22750 23353 17735 20535 20467 21310 21075 21987 21572 22533 21703 32593 25059 24260 22924 23351 22745 18433 20889 21888 21595 22036 21546 22324 22199 22700 22155 25180 23441 23731 23116 23278 16992 21540 22181 22616 21760 22473 22304 22520 21773 22743 25492 23736 22391 23688 22690 22273 22491 22969 21447 23161 22354 22023 23500 21888 22920 24480 22295 24119 22288 23320 22439 22372 23604 22107 22949 22129 23847 22030 22799 22249 23855 22096 22860 22630 22824 22779 22692 22841 23025 22337 23200 22583 22695 23072 22935 22735 23312 22631 22672 22746 23120 22501 22536 22380 23414 22711 22759 22234 23168 22749 23154 22893 22995 22136 22693 22214 23056 22327 23302 22503 23335 22606 22938 22513 22880 22120 22764 22105 22827 22096 22694 22157 22749 22219 22764 22231 23056 22329 23068 22617 23349 22519 23456 22307 23078 22290 22725 22204 23217 22765 23107 22797 22736 22272 22693 22293 23380 22385 23151 22124 22769 22727 23191 22749 22942 22148 22946 22611 23047 22224 22912 22824 22832 22211 22806 22681 23134 22229 23013 
21861 21797 22709 21617 22528 21810 22552 21716 22584 21639 22547 21708 22545 21528 22284 21301 22314 21364 21974 21345 21991 21641 22431 22053 22352 21978 22252 21661 22200 21363 22180 21764 22705 21611 22505 21794 22033 21421 22110 21735 22019 21591 22595 21877 21940 21453 22471 21581 22009 21757 22770 21520 22173 21511 22432 21579 22023 22071 22225 21436 22161 21991 22177 21365 22647 22009 22024 21352 22237 21809 22072 21549 22772 21676 22309 21749 22315 21403 22627 21862 21910 21601 22512 21509 22327 22042 21856 21809 22302 21756 22615 21627 22545 21269 22678 21523 22245 21771 22306 21728 22764 21940 22144 22064 22007 21747 22113 22114 22265 21657 22362 21739 22487 21753 22456 21537 22645 21539 22167 21830 22291 21843 22161 21958 22288 22128 22106 22011 21941 22148 22027 21704 22327 21720 22595 21363 22542 21521 22976 21184 22184 21634 22379 22248 21550 22401 21227 22665 21925 21360 22599 20994 23333 20936 22314 21729 21856 22873 21265 22021 21843 21915 22947 21011 22120 21916 21600 23040 21669 21544 22389 21057 23145 21643 21876 22403 21193 22752 22154 21415 22317 21431 22606 22070 76 6529 9287 10601 11813 12748 12687 13591 13531 13961 33552 28536 25997 25152 23613 24067 22646 22928 22721 22357 22744 22529 22197 22632 21861 22580 22357 22064 21879 22540 21667 22703 22000 22256 22039 21944 22073 22667 21612 22240 21728 22455 22253 22036 21648 22488 21622 22712 21587 22053 21932 22151 21896 22631 21457 22258 21747 22196 22155 22315 21531 22437 21576 22471 22024 22028 21294 22631 21472 22552 21971 21912 21536 22642 21346 22465 22115 21993 21599 22570 21627 22272 22080 22255 21459 22466 21568 22215 22070 22553 21226 22348 21944 22195 21517 22751 21898 21988 21805 22375 21737 21893 22072 22688 21479 22123 21703 22673 21669 21991 21793 22807 21553 22007 21623 22520 21744 21895 22000 22597 21456 22041 21744 22439 21688 21956 21883 22639 21889 21932 21625 22227 21949 22250 21531 22128 22073 22643 21661 21952 21642 22197 21810 22493 21601 22009 21847 22672 21747 21739 21549 22188 21818 22409 21877 21523 21539 22853 23081 22905 21238 21458 21600 21879 21895 22687 22049 21417 20935 21520 22147 23048 22984 22835 21722 21364 20999 21157 21804 22397 22319 22321 21230 21047 21068 22068 22606 23224 22873 21892 21060 0 9015 12608 14520 15749 16252 16256 16448 16453 17344 35320 29399 26045 24711 23303 23272 22609 22728 22380 22613 22377 22663 22246 22241 21877 21991 21763 22240 22126 22580 22305 22737 22148 22190 21509 21993 21756 22144 21892 22187 21895 22538 21997 22433 21791 22186 21596 22036 21457 22036 21687 22345 21986 22592 22082 22837 22148 22711 22092 22487 21819 22077 21356 22247 21403 22313 21506 22399 21725 22485 21975 22505 21943 22199 21473 22007 21578 22200 21881 22432 21888 22801 22005 22670 21840 22528 21392 22097 21383 21976 21591 22200 21565 22341 21693 22357 21907 22455 21921 22452 21856 22533 21655 22304 21466 22139 21337 22367 21612 22451 21914 22648 22041 22665 22215 22627 22133 22647 22167 22512 22027 22217 21725 22037 21574 21904 21534 21860 21432 21900 21437 22085 21536 22164 21713 22203 21744 22086 21623 22227 21760 22235 21678 22103 21853 22246 21771 21972 21687 22183 21788 21988 21652 21922 21753 21876 21608 21766 21537 21760 21509 21829 21557 22195 21538 21930 21584 21714 21575 21728 21463 22197 21667 21568 21685 21787 22048 21800 21679 21865 21604 21795 22118 21941 22215 22034 22256 21972 22404 22082 22298 22077 10877 15366 16983 17653 18258 18455 18720 18528 18999 18856 28600 25008 23881 22784 22656 22121 22475 21785 22411 22065 22424 21944 22452 21841 22287 21765 22221 21582 22093 21488 22000 21548 22006 21556 21914 21699 22576 22181 22737 21931 22212 21427 22238 21626 22621 21745 22084 21662 22764 21680 22417 21755 22009 22117 22306 21703 22465 21701 22497 21508 22512 21673 22551 21624 22231 22004 22155 21831 22564 21301 22460 21933 22153 21528 22679 21895 22583 21707 21945 21307 22097 21783 22484 21945 22643 21969 22565 22097 22505 21933 22365 21440 22114 21826 22528 21825 22695 21872 22062 21347 21984 21532 22263 22209 22427 21831 22089 21384 22188 21689 22553 21880 22569 21632 21814 21480 22184 21856 22244 22177 22582 22048 22336 21344 21719 21215 21734 21767 22484 21735 23095 22278 23104 22218 22064 20912 21263 21015 21618 21367 21470 22077 21755 22408 21857 22643 22048 22957 22212 22940 22185 22769 21787 21794 21641 21019 21366 21032 21689 22282 23249 21944 21956 21344 21629 22248 21919 22381 21544 22161 22240 22116 21622 22196 21990 21892 21969 22231 21649 22225 21912 21890 22198 22049 21768 22503 21820 22353 21946 21960 21767 10204 17249 18947 19129 20463 19632 20584 19776 20966 19968 29002 24340 24050 22328 22976 22247 22626 21504 22573 21641 22776 21777 22509 21480 22760 21705 22555 21911 22067 22125 22440 21687 22558 21444 22645 22020 21906 21680 22428 21344 22620 22022 22116 21602 22562 21751 22175 21760 22580 21424 22212 21832 22423 21456 22656 22060 21901 21595 22320 21845 22097 21569 22861 21916 21997 21410 22398 21831 22327 21531 22448 22115 22739 21735 21912 21720 22277 22043 22104 21465 22196 22164 22681 22018 22055 21579 22601 21719 22435 22049 22304 21654 22000 21565 22427 22087 22771 22214 22459 21674 21704 20939 21393 21232 21664 21561 22219 21561 22016 21914 22574 22341 22487 21979 21689 21151 21256 21062 21168 21016 21130 20992 21171 20918 21209 20877 21112 21504 21824 21497 21577 21713 21873 21449 21681 22133 21785 21946 21557 22010 21561 21898 21552 21912 21527 21781 21813 21967 21789 22145 21975 22285 22085 22359 22056 22411 21798 22191 21776 22153 21699 22045 21985 22204 21748 21841 21488 21879 21681 22435 22145 22730 22196 22683 22136 22560 21859 22346 21494 21944 21477 22243 21789 22602 21747 22384 21651 22265 21948 22113 21266 22012 18232 20823 21042 21743 21193 21425 20893 21331 20948 27851 23632 23315 22064 22501 21757 22567 21367 22289 21782 22742 22217 22693 21917 22344 21515 22021 21726 22327 21870 22435 21544 22213 21337 22038 21639 22331 21917 22784 21999 22590 21740 22039 21457 22320 21984 22528 21623 22272 21659 22186 21431 22112 21944 22656 22020 22135 21565 22171 21947 22371 21667 22121 21372 22192 22054 22763 22200 22208 21500 21899 22053 22357 21761 21860 21001 22320 22487 23113 22354 21362 21171 22471 22206 21744 21176 21484 22404 23254 21972 21328 21056 22490 22133 22091 21851 21435 21415 22822 22963 22219 20939 21959 22390 21855 21384 21224 22199 23232 22547 21249 21966 21966 22216 21761 21959 21739 22467 22256 22309 21550 21968 22212 22112 21793 21760 22005 22370 22236 22329 21766 22048 21985 22231 21678 21943 21605 22635 22146 22240 21724 21953 22049 22334 21436 21987 21804 22731 22053 22152 21591 22505 21721 22248 21386 22455 22102 22683 21632 22026 21874 22451 21573 22068 21409 22640 22081 22533 21327 22087 21611 22533 21781 22428 21811 22285 22074 22156 21507 21965 21395 22064 21473 22200 21530 22458 21708 22574 21840 22615 21447 22161 21591 22365 21561 22136 21431 22077 21512 22099 21608 21998 21530 22372 21632 22489 21795 22426 21357 22338 22133 22711 21376 22452 21809 22088 21811 22533 21692 22423 21349 22611 21545 22365 21825 22034 21929 22063 21600 22475 22049 22206 21554 21994 21618 22117 21675 22132 21564 21934 21536 22189 22085 22492 21436 21808 21319 21711 21913 22716 21793 23264 22311 22852 21623 21306 21294 21898 23001 22597 21002 21385 21428 23224 22376 22177 21153 21319 21603 22020 22997 22628 21258 21071 21644 22662 22023 22516 21222 21236 21274 21718 22740 22388 22939 22388 21573 21787 21888 21455 21447 22104 22144 22215 22427 21867 21852 21688 22283 21865 22408 22166 22289 21952 21713 21547 21987 22175 22197 22173 22337 21981 22262 21752 22074 21345 21927 21521 21941 21469 21986 21618 21843 21452 21940 21520 22001 21345 21957 21245 22164 21623 22272 21943 22328 22006 22487 22121 22336 21824 22071 21312 22039 21613 22420 21792 22818 21649 22464 21718 21975 21669 22501 22087 22275 21578 21996 21592 22579 21677 22601 21328 22151 21824 22580 21767 22056 21699 22745 21561 21980 21924 22360 21749 21951 21911 22714 21516 22505 22055 22199 21664 22800 21671 22349 22016 22644 21497 22833 21427 22208 22073 22138 21925 22477 21379 22515 21674 22193 21803 21957 22083 22206 21594 22599 21442 22326 21543 22386 22107 22322 4627 9799 11363 13023 13655 14202 14225 14896 15293 40977 31034 27203 26131 23584 23533 22753 23433 22381 22044 22589 22393 22492 21661 22763 21479 23251 71 10072 13349 15561 17348 16178 17224 17870 17032 19234 35095 28516 26313 23536 24471 22793 22236 22989 22023 22345 23434 21833 21748 22216 22266 21711 22663 6070 14322 16810 18125 18208 19429 19453 19153 19358 19951 30912 26213 24792 23879 22592 22516 22379 22518 21865 22787 22412 22215 21755 22302 22276 22138 21863 13974 17773 19005 19831 20453 20243 20461 20051 21161 20764 27087 23881 23495 22518 23083 21767 22666 22307 22731 21634 22237 21672 22393 21865 22455 21405 22320 18465 20762 20473 21060 20651 21570 21112 21912 21212 27492 23319 23442 22546 23151 21981 22277 21586 22496 21768 22485 21951 22446 21523 21929 21671 22644 22135 22640 21943 22389 21298 22048 21524 22642 21658 22538 21847 22475 21662 22324 21463 22007 21579 22252 21927 22590 22142 22595 21837 22117 21508 22080 21090 22157 21728 22357 21871 22492 21737 22055 21459 21922 21632 22319 21929 22701 22511 22534 21888 22053 21366 21334 20860 21294 21161 21649 21436 21543 21556 22071 22044 22299 22355 22716 22402 22503 22301 22464 22261 22203 21739 21969 21716 22034 21601 21853 20932 21162 20864 21241 20888 21142 20832 21080 21477 21530 21813 21504 21856 21473 21863 21542 21990 21557 21769 21532 21840 21751 21848 21661 21937 21740 22012 21779 22256 21664 22040 21699 22167 21825 22254 21923 22405 21876 22345 22068 22403 21960 22455 21863 22337 21837 22263 21585 22120 21644 22016 21559 21922 21366 21962 21573 22455 21947 22470 21922 22695 21997 22711 21795 22316 21455 22021 21453 22247 21894 22561 21879 22350 21657 22301 21581 22102 21229 21990 21281 22461 21952 22727 21941 22761 22128 22510 21804 22336 21543 21879 21611 22421 21712 22521 21801 22261 21547 22401 21321 22119 21228 22117 21692 22568 21992 22676 22079 22653 21817 22142 21559 21916 21404 22048 21724 22273 21940 22380 21843 22327 21751 22083 21509 22021 20944 22071 21465 21833 21458 21753 21773 22648 22368 23085 22736 22908 22743 22833 22313 22389 22060 22611 22477 22888 23061 23120 21740 21319 21413 22436 21748 21305 22888 21857 21256 22395 21192 22663 22268 21564 22237 21188 22976 21261 22178 21545 22176 21704 21920 22264 22109 21536 22159 21982 22473 21785 22020 21813 21965 21639 22149 21927 22488 22039 22182 21509 22016 22217 21929 21671 22224 21719 22323 21617 21723 22069 22183 21705 22332 21632 22058 21504 22305 22211 22652 21949 22465 21788 22357 21869 22516 22087 22695 21934 22248 21416 22222 21720 22431 21577 22006 21731 22686 21910 21890 21280 22566 21632 22326 21917 22318 21504 22119 21231 22113 21459 22576 21936 22648 22099 22765 22129 22679 21853 22205 21434 21976 21588 22312 21791 22504 21348 22312 21989 22670 21453 22140 21648 22411 21769 22176 21525 22530 21991 22109 21508 22219 21832 22332 21356 22378 22060 22028 21620 22446 21673 22160 22191 21845 21681 22225 21504 22617 21241 22080 21891 21642 22763 21867 21164 22193 22249 21225 21331 23168 22807 21518 21130 21834 22205 22458 99 7823 12169 14289 14508 14211 13925 14728 14855 15438 34945 29445 26635 25232 24038 23459 10627 14916 16708 17169 18028 17757 18202 17993 18200 35706 28660 25751 24737 24035 23751 11873 16313 17564 18858 19157 19875 19482 19543 19623 36954 28233 25944 24081 23566 22629 13826 17687 19631 19499 20790 20634 20902 20164 21318 20474 27369 23994 24273 22660 22829 16313 19912 19991 21889 20817 21565 21199 21683 21427 21785 25076 23906 22405 22935 22215 22428 21872 22211 22158 22328 21838 22354 22218 22148 22085 22064 22290 22033 21815 22276 21739 22478 21347 22621 21844 22124 21963 22544 21514 22580 21783 22064 22001 22407 21685 21990 21591 22680 21804 21975 21734 22192 22250 22473 21525 21992 21879 22443 21773 22630 21907 22173 21661 21610 21341 21944 21984 21912 22423 22084 22919 22197 23030 22391 23020 22479 23011 22272 22892 22016 22780 21822 22764 21784 21655 21559 20888 21138 21184 22167 22451 23242 21751 22126 21824 21584 21825 21956 22650 21874 22275 21805 21792 21915 22234 22209 22007 21539 21874 22045 22537 21399 21850 21887 22272 21862 21779 21869 22464 21746 21815 21827 22279 21769 
21963 21536 21682 21712 21827 21528 21560 21520 21495 21445 21577 21431 21820 22048 22720 22325 22792 22254 23009 21942 22706 21272 21148 21028 20909 21079 21920 22315 22327 22618 21529 20992 20992 20933 22045 22267 22824 21649 21511 21425 21660 22085 21795 21990 21512 21376 21536 21984 22200 21659 21543 21448 21814 22231 21511 21529 21303 22153 21968 21744 21290 21897 21920 21985 21371 21920 21953 21831 21268 21928 21605 21894 21217 22127 21965 21121 21103 22638 22055 21063 21587 22272 20752 21953 22158 21423 21612 21749 21560 22253 21405 21865 21480 22016 21800 22087 21854 21529 22124 21603 21911 21313 22202 21456 21584 21879 21618 21988 21722 22016 21391 22272 21413 22062 21253 22195 21511 21671 21765 21741 22017 21766 21788 21632 22035 21646 21559 21717 21931 21880 21457 22080 21387 22281 21328 21843 21321 22300 21384 21723 21773 21812 21932 21632 21604 21752 21600 22080 21483 22103 21271 22276 21455 21813 21696 21683 21933 21567 21492 21996 21328 22441 21280 21857 21743 21700 21904 21864 21656 22123 21143 22311 21724 21651 21666 21729 21753 22173 21296 22016 21568 21732 21913 21849 14848 17690 17724 19040 19051 19201 19065 19733 19106 34321 24740 23447 22541 22044 22184 21953 21569 22276 21164 22237 21720 21806 21661 21813 21632 22326 21284 21916 21761 21580 21941 21991 21548 22010 21415 21879 22016 21571 21495 22085 21461 22332 21248 21804 21751 21561 21939 21899 21531 22158 21281 22072 21975 21381 21557 22240 21201 22899 21093 21432 21986 21317 21479 22917 20861 21472 22166 21065 21573 22785 20897 21735 22223 20793 22262 22781 20826 21585 22278 21014 21593 22982 21204 21620 21990 21357 21239 22978 21656 21328 21472 22372 20924 21442 22640 22144 21117 21401 22274 21736 21356 21824 22135 21368 21591 21568 22011 21576 21569 21821 22192 21563 21753 21666 21979 21623 21487 21969 22164 21382 22149 21744 22087 21544 21565 21944 22131 21539 21689 21857 21884 21870 21564 21402 21901 21934 22147 21298 21747 21575 22020 21752 21896 21261 21894 21879 22327 21617 21562 21510 21963 21687 22056 21486 21616 21581 22288 21893 22027 21285 21640 21431 22065 21790 22112 21344 21642 21400 22103 21896 22280 21826 21859 21261 21670 21298 21829 21802 22156 21505 21733 21175 21784 21601 22341 21875 22289 21671 21664 21310 21934 12849 18720 19579 20325 19704 20211 19938 20617 20679 21229 26225 23524 21933 22332 21908 22241 21745 22272 21812 21928 21397 21562 21229 21784 21541 22081 21965 22282 21966 22231 21682 21933 21214 21842 21305 21808 21473 21999 21719 22099 21636 21792 21275 21607 21203 21726 21408 21851 21748 22281 22080 22398 21912 22414 22009 21820 21095 21128 20827 21216 21124 21522 21556 22055 22112 22473 22242 22284 21689 21525 21084 21015 20685 21326 21769 22583 22744 22957 22712 22947 22314 22023 21232 21066 21018 21284 21371 21931 21306 21474 21913 22304 22336 22425 21895 21816 21811 21712 21667 21361 21506 21322 21431 21447 21657 21754 21938 22080 22162 22129 22055 22146 22033 21912 21930 21664 21807 21412 21719 21315 21531 21464 21617 21499 21831 21562 22067 21506 21820 21476 21809 21545 21873 21657 21795 21693 22056 21867 22173 21764 22177 21789 22064 21755 22131 21750 22121 21719 22131 21841 22183 21800 22095 21689 22216 21754 22156 21696 22112 21688 22157 21795 21995 21675 22144 21865 22093 21787 22080 21611 22161 21601 22089 21632 22147 21644 22123 21712 22124 21815 22208 21858 22064 21728 21952 21579 22041 21485 21945 21354 21755 21215 18550 19609 20539 20161 20951 20481 21012 20670 21028 28188 23818 22384 22359 21922 22275 21856 22154 21818 22275 22022 22290 21964 22368 21991 22391 21900 22309 21922 22256 21645 21965 21497 21893 21658 22212 22105 22291 21591 21373 20961 21795 21490 22243 22007 21307 20897 22401 22614 21261 21295 22208 21077 22571 21686 21596 22316 21011 22662 21235 22103 20793 22693 21577 22213 21678 21410 21911 20640 22451 21319 20866 22087 22162 21988 21372 20805 21674 22000 22083 21689 21835 21409 21369 21678 21452 21664 21287 21430 21451 21761 21772 21682 22098 22016 21760 21504 21368 21765 21554 22226 21728 22182 21464 21586 21315 21776 21784 21984 21984 22012 21316 21460 21670 22037 21569 22349 21837 22121 21476 21636 21362 21917 21636 21796 21874 22055 21981 22119 21700 21968 21328 21649 21267 21649 20817 22304 21589 22428 21752 22310 21811 22232 21783 22016 21682 21915 21498 21729 21344 21727 21465 21904 21671 22269 21632 22336 21538 22103 22006 21716 21159 21913 21815 21997 21856 21993 21383 22290 21565 21991 21178 22256 21837 21648 21509 22256 21256 21841 21977 21837 21728 22250 21323 22109 21587 21655 21563 21655 21910 21819 21414 18361 20124 21371 21070 21450 21142 21314 21617 21328 21376 23552 22627 21916 21802 21619 22065 21806 22018 21204 22437 21127 21945 21332 22256 21914 21270 22408 20608 22731 21613 21504 22406 20879 22481 22336 20963 21622 22189 20800 22187 22660 20930 21722 22190 21637 20707 22392 22622 21192 21446 22523 21076 21254 22647 22359 21387 21893 21905 21901 21504 21808 22183 21815 21477 22026 21805 21920 21629 21530 22004 22094 21894 21390 21625 21484 21985 21897 21442 21575 22163 21982 22027 21424 21576 21495 21767 21792 21995 21639 21664 21297 21772 21656 22204 21960 22202 21569 21667 21163 21724 21356 22070 21431 21860 21480 22025 21740 22144 21719 22127 21463 21621 21306 21593 21349 21740 21393 21849 21489 21888 21584 22024 21504 22091 21516 22060 21627 22353 21965 22368 21928 22307 22000 22322 21921 22305 21920 22171 21733 22245 21744 22011 21529 22080 21541 22030 21414 21826 21290 21588 21165 21696 21322 21700 21473 21979 21738 22074 21810 22151 21720 22132 21703 21904 21457 21797 21544 21741 21404 21690 21256 21849 21515 21892 21696 22243 22112 22394 21895 21943 21322 21285 20932 21419 21716 21845 22053 22464 22087 21767 21358 21577 20244 20715 21009 22039 22548 22880 22288 21691 20698 23010 21167 21649 22093 22477 22208 21921 21333 21379 20986 21191 21785 22743 22739 22899 22436 21607 21534 21301 21799 21820 22089 21740 21652 22017 21749 21655 21415 21708 22127 22100 22120 21881 21655 21321 21549 21800 21985 21831 21943 21545 21760 21483 21679 21831 22196 22023 22035 21341 21649 21693 22087 21571 21746 21282 21545 21555 22247 22034 22044 21323 21650 21812 22094 21561 21684 21239 21608 21654 22345 21765 21781 21171 22105 21752 21884 21513 21682 21708 22318 21699 21715 21278 22101 21682 22009 21397 21767 21273 22254 21905 21959 21097 21953 21672 21927 21366 21736 21592 22377 21781 21721 21249 22059 21600 21811 21351 21766 21720 22421 21560 21683 21451 22199 21659 21868 21237 21586 21632 22306 21843 21777 21273 22023 21742 21839 21265 21702 21982 22352 21789 21839 21368 22024 21713 21813 21331 21996 22081 22183 21320 21739 21632 22000 21439 21441 21203 22112 22392 21728 21024 21880 22119 21635 21221 21158 21865 23079 22225 21557 20555 20975 21545 21657 21915 22496 22107 21890 21553 21534 20695 21581 21304 21473 21120 21319 21191 21273 20979 21184 21168 21337 21065 21243 21254 21412 21376 21239 21622 21471 21648 21543 21815 21890 22075 21728 21517 21476 21853 22072 21865 21413 21573 21967 21729 21677 22075 21465 21874 21463 22260 21384 21963 21251 22150 21579 21728 22114 21735 21417 22057 21901 22212 21692 22091 21484 21941 21424 22136 21529 22221 21620 21672 21341 21735 21957 22023 22024 22186 21580 21876 21400 21608 21533 21985 21481 22296 21529 21718 21201 21891 22029 22132 21323 21593 21130 22144 21668 22167 21383 21665 21249 21714 21834 22166 21613 21814 21405 22150 21573 22314 21751 21859 21266 21739 21346 21815 21681 21937 21978 22181 21629 21943 21328 21733 21500 22327 21800 22159 21529 21762 21194 21961 21553 21872 21874 22100 21455 21745 21445 21693 21340 21808 21418 22139 21562 22283 21616 22284 21625 22325 21760 22400 21779 22275 21636 22293 21665 22376 21525 22132 21440 21926 21379 21316 21138 21067 20912 21844 21853 22394 22736 21760 21929 21606 20653 21119 21378 22240 22212 22875 21357 20971 20937 21831 22617 22076 21932 21487 21021 21794 22295 22603 21399 20968 22199 22097 21210 21113 22247 22605 21089 21216 22215 21698 21396 21813 21880 21478 21704 21888 21717 21457 21974 21560 21482 22016 21772 21481 22019 21652 21635 21779 21565 21934 21680 21468 22256 21802 21988 21884 21552 21845 21847 21793 21847 21359 22204 21312 22068 21418 17500 18304 19491 19174 20002 19387 20183 19740 20336 28662 24560 22864 22528 21916 22311 21641 22277 21684 22215 21323 22304 21410 22069 21318 22321 21314 12450 18503 19762 20470 20340 20289 21017 20134 21395 20544 26624 23415 22583 22088 22383 21809 22188 21585 21723 21921 21773 21312 22093 21645 21589 21860 22004 16718 20273 20296 20838 21108 21552 20605 21177 21170 21347 23927 23288 22272 21938 21621 22129 21632 21773 21998 22189 21336 21601 21725 22114 21309 21910 21963 19559 20216 21088 21319 21581 20861 21400 21691 21793 29201 23284 22088 22428 21836 21287 22212 22917 21676 21224 21083 21800 22221 22144 20682 21184 22193 22951 20993 20760 20978 21271 21781 22294 21684 20858 20579 23927 23131 23000 21802 21284 21111 21416 21620 22537 21891 21272 20674 21232 21879 22539 22403 22023 21840 21388 21581 21387 21846 21581 21697 21856 22017 21700 21606 21410 21397 21648 21893 21892 22160 22018 22257 21937 21696 21380 21551 21583 21747 21732 21937 21733 21964 21644 21708 21233 21463 21441 21945 21813 22211 22002 22323 21913 21932 21225 21515 21264 21659 21550 21930 21393 21801 21447 21893 21668 22152 21747 22082 21568 21896 21416 21705 21372 21696 21196 21559 21210 21633 21218 21676 21162 21596 21191 21986 21452 21869 21445 21992 21530 22041 21638 21942 21785 22025 21596 22048 21559 22071 21570 21960 21613 22001 21431 21959 21402 21720 21431 21690 21336 21616 21244 21584 21401 21660 21313 21588 21243 21607 21219 21703 21225 21782 21415 21881 21352 21660 21353 21763 21702 22116 21704 22064 21696 21915 21489 21784 21416 21536 21175 21128 20935 21251 20828 21555 21856 22503 22648 22930 22504 22122 21122 20943 20656 20937 20959 21693 22003 22473 22237 21789 21332 21353 21320 21221 20835 21570 21136 21687 21958 22773 22797 22760 22136 21721 21553 21319 21480 21518 21945 21839 21926 21720 21688 21659 21715 21594 21605 21442 21616 21793 22060 22064 22166 22077 22129 21789 21819 21478 21630 21309 21541 21493 21743 21740 22032 21807 22123 21699 22021 21658 21706 21543 21612 21271 21623 21224 21716 21593 22101 21980 22282 21958 22392 21904 22333 21892 22292 21915 22009 21261 21828 21405 22001 21475 21607 21922 22039 21390 22071 21515 21933 21803 21762 21504 21889 21737 21888 21444 21879 21888 21689 21799 21999 21308 22124 21868 21616 21323 21777 21742 22340 21719 22208 21715 22210 21526 21696 21223 21750 22024 21960 21403 22287 21504 21775 21665 22087 21621 22016 21381 21923 21937 21733 21441 22138 21600 21741 21464 21770 21270 21518 21154 21366 21100 21177 21196 21441 21475 22172 21984 21013 20838 22288 22766 22425 20983 21293 21434 22420 21981 21197 20616 21096 21751 22743 22788 22876 22237 22039 21361 21059 20888 21205 20994 21560 21748 21483 21571 21857 22081 21924 21656 21344 21841 22006 22152 21507 21645 21644 21892 21899 21505 21436 21941 22059 21907 21396 21632 21769 22065 21351 21669 21845 22092 21486 21807 21881 21721 21453 22289 21467 21769 21891 21560 21916 21731 21514 22083 21284 22200 21476 21984 21550 22059 21238 22116 21943 21840 21324 21845 21545 22048 21308 21728 21688 15318 17985 19027 19371 19879 19721 20439 20016 20439 19610 25779 23141 22854 22088 22341 11943 19045 19814 20459 20345 20693 20225 20842 20592 21461 26306 23926 22440 22370 21767 22038 18290 20540 21031 21585 21015 21133 20707 21397 21088 27643 23195 22745 21696 22322 22122 19243 20188 21271 21209 21432 20992 21616 21803 21431 20876 23491 22405 21737 21412 22982 18921 20823 21581 21152 21465 22536 20408 22219 21180 21267 23678 21591 22042 21633 21354 22899 20755 22426 21157 22880 20790 22448 21013 22759 20984 22456 21114 22279 21615 21649 22025 21391 21897 21605 21703 21830 21489 21644 21945 21589 21805 21883 21715 21331 21712 22074 21740 21377 21962 21774 22115 21561 21607 21376 21813 21978 22066 21617 21670 21379 21615 21481 21995 21577 22120 21761 22219 21674 21952 21428 21739 21391 21591 21200 21593 21287 21715 21302 21632 21593 21815 21642 21937 21804 22272 21735 22258 21520 22045 21395 21605 21287 21971 21875 22155 21916 21867 21287 21704 21351 22280 21637 22155 21387 21713 21532 22210 21935 21815 21163 21920 21863 22218 21308 21649 21911 21952 21418 21574 21682 22256 21408 21721 21846 
38187 33112 34688 35048 36440 32985 33250 32591 42815 42668 34016 42160 36720 38712 35625 41793 36554 41365 39098 37973 35571 40394 39512 38054 36929 38698 37478 41841 42228 34905 33053 37210 37380 37045 38983 41626 36988 34487 32832 41866 34928 39255 36275 38420 32896 41168 33222 38000 40620 34950 33322 42128 36637 41079 33188 32953 40791 40234 38120 35650 40672 37432 37440 38328 41868 37609 37904 36752 40368 37724 34180 37160 40059 40231 38376 42906 41964 41500 32839 33975 34595 38329 40609 35802 37256 36599 41076 39255 34322 34010 35635 39349 39760 40256 34277 34538 34848 38071 40348 40576 33728 34786 36309 38063 40555 39472 42409 38719 42288 33656 36692 36387 42280 39442 40429 40744 33153 34752 35677 35786 38362 35842 36049 34069 38596 34672 33522 35244 37747 37172 42441 39339 41964 41555 41229 36954 41126 41769 41828 35823 35936 36278 37696 34182 33876 35635 33804 38928 43040 39941 40786 41336 42935 36696 34923 34918 37741 33893 42683 38758 41112 43267 40745 37034 35936 35075 37094 36906 34539 39799 39504 41904 35722 34541 34520 35368 35829 40345 40824 38500 33497 35372 37408 36880 33977 32992 33426 37064 37645 38896 37844 34726 37904 37320 36358 43536 34032 38759 40453 38023 33608 40983 39724 41313 35553 36373 34786 36312 34104 41701 40821 37727 35680 33741 37720 38549 33472 38525 42228 37564 38337 33730 42900 39620 42752 42231 40292 36460 35920 33536 37670 37428 33272 40037 40699 39320 38438 41729 33780 40724 40049 37925 38802 42320 38531 41113 43144 38128 36486 42481 40474 38586 33833 36085 36484 35725 41012 35669 41320 36843 35872 33719 41095 37987 34068 38486 39959 34369 38327 41687 40768 38665 34612 40887 42739 42575 37215 42275 34980 39621 39330 42045 41369 35744 41492 36526 40045 41735 34293 33305 38625 33711 33398 36460 40320 33841 35746 34601 38284 34516 42969 38349 40172 41814 40167 35724 39424 33353 33571 37657 39945 33384 34936 36692 37296 37204 33632 41731 37680 37888 40002 40886 35984 33768 38327 35841 37136 40512 37416 37345 41988 34433 33483 32662 37988 35200 38838 43059 34398 33805 41041 37423 38760 40770 34560 42240 39280 36313 39457 41307 34663 41681 39904 37324 41216 36608 36940 40492 35005 40688 36752 36240 40059 32851 35432 39687 36096 33957 41878 37376 41324 35116 34468 40987 38040 33041 33482 33040 40899 34656 39904 37120 33479 34176 40249 42640 44551 38208 42024 37540 41051 35878 40945 36481 37568 41878 33819 40259 36105 33272 39048 38327 41382 38424 41141 35073 37766 40245 36788 40976 36352 42595 39008 35632 39449 34382 35817 40611 34421 39856 35771 41736 37180 35753 41267 39296 42933 37661 42842 38944 36578 38871 39084 36081 39891 39068 33037 33229 38939 39605 43552 41312 41555 35281 32968 38480 37984 34488 41166 36070 34240 35869 38424 35664 38162 41748 38879 40208 38579 37947 40646 41987 37958 41015 42835 37792 41459 41991 43120 37632 36388 36352 35113 34678 41369 32928 40899 42573 42800 34964 35808 37669 39124 40167 39955 39233 39956 38766 37472 37716 34573 36404 41888 35745 40960 33472 42333 34474 42978 36962 33573 38948 32790 36324 42613 36529 33332 36904 34657 36082 35208 38849 37248 40438 35840 40217 36356 38912 36096 39879 35960 39760 35653 39857 36774 40511 36297 39641 35209 40626 36055 40060 35088 39415 35096 40130 36312 38567 35056 39668 37160 39584 36292 39072 34409 39945 34130 39286 34240 39852 34624 39824 35289 39776 36656 40488 36997 38928 35453 37696 33898 38692 43058 38176 41558 36208 40280 32207 33125 32513 39108 37447 31735 37474 34295 37792 43218 37736 42410 42621 37772 41282 36949 40077 36621 41216 38772 41399 38327 42224 38784 42824 37609 41714 37724 41149 34820 38150 43095 37529 34708 40554 39780 41547 34251 41700 37529 36174 42776 41408 38936 41144 36736 42484 34805 40389 41163 40714 38762 34215 34873 33890 41601 38011 35049 40271 39832 35632 35353 33654 40596 35223 41746 37809 33628 42952 41473 36313 39424 40183 38500 41815 35818 34788 38272 39373 35212 36686 41940 41953 35264 42384 34807 40716 42455 42850 35899 35849 34832 39303 38434 35590 32517 41368 36003 33316 40631 35532 40322 42708 34049 40885 35925 35911 38128 38212 38778 41031 42697 35072 38720 33640 42059 37010 39796 42800 34572 41381 37856 34328 35980 36999 39105 38520 39943 35201 37905 41028 34668 40371 34632 35677 41329 34130 42757 36043 41607 36577 40882 36288 38272 34935 37511 43036 35753 41133 35920 42584 37425 34944 41447 34332 41625 33373 39526 38666 35431 39474 37616 36544 38617 36824 38453 41840 41536 33980 38424 39752 41223 36995 34377 32704 40883 40461 36804 38280 36853 35354 41128 41446 39968 34054 34568 33577 34553 37326 36603 42014 40583 39185 41911 38830 42518 39504 41025 34404 40864 41584 34440 34595 37447 36284 34288 38902 36507 38416 39961 43162 39448 38056 41179 41332 37673 40528 42741 33431 35840 34252 32443 42368 36823 43415 42039 37671 34405 40476 35509 40535 35040 36803 35397 40546 34532 34519 42439 34999 39674 42539 44394 38792 40429 35284 42230 42085 37399 37339 37464 32609 35968 40471 36666 42764 38817 36512 37369 34583 33024 38353 39617 37354 41874 34678 42741 38546 37367 42260 34083 40054 38562 38823 42029 33915 42932 36184 35918 38538 34569 34436 40628 36072 34522 40593 38116 40708 33710 34581 39504 35657 41492 39360 42512 37143 42722 38912 35815 39694 35642 40008 42854 34637 40838 34168 41321 35936 41667 37082 42839 37280 33698 38394 32675 39346 33088 38928 34620 41960 38454 42240 37827 41668 38584 41805 37734 41560 37617 40417 35798 41112 35784 38759 33248 38936 33408 38633 42139 36672 40752 33995 39505 35061 41011 35258 42528 38628 35752 39187 36366 40103 35509 39786 35458 37143 42444 36457 33211 35677 41868 35312 40160 36979 33010 36952 34922 41010 39680 42807 37642 38037 41174 40912 37100 42194 35528 36708 38960 43184 39776 36056 41622 33953 39936 34944 37570 38891 33685 37216 41243 35430 34448 38785 39820 34571 39432 43696 40832 37712 41312 41853 37936 39956 36169 36096 35954 37744 42957 34546 33184 40704 36471 36485 39401 35847 34450 38244 35894 34651 42041 35514 40016 39584 39833 37403 34754 40998 33696 35992 38233 36755 37976 33416 35373 42834 35409 36611 40480 38860 38864 41561 34666 35127 39392 33792 35537 40480 33544 33293 41079 38818 38994 41337 34650 36188 39532 33725 34813 40388 34219 34464 41945 36048 35989 39541 39714 35920 37271 32911 34682 35158 41781 35408 35331 40600 39692 34996 38608 41936 36137 40500 41516 37521 38197 38903 37940 34816 37692 41704 35780 33785 42304 36272 35458 40072 39288 33997 36248 41512 36011 35318 42730 33769 34843 42409 40968 34983 37008 40391 33926 33966 41344 36967 35876 40497 38839 35936 36864 40373 35343 38354 42045 36464 36888 41576 38727 35360 36352 41181 38684 39292 40642 41196 35970 34072 38256 42633 42537 40224 39629 42711 35648 37700 37153 39895 34496 40081 39559 37144 39747 40992 33750 32741 37542 33345 34458 37485 43491 40052 37260 33414 33111 34458 33757 40688 42796 39079 41296 40119 40720 37780 39600 39536 41472 38678 40665 40495 42121 41637 40759 34553 42788 34662 33280 36368 37068 39370 35463 32992 42435 37260 39144 37144 42069 33955 38204 35532 34970 39259 42756 37317 42716 41532 41824 38425 40346 40150 34032 35223 39511 35863 42040 39277 37543 40688 35305 39461 42994 38145 42038 40152 33312 40793 34407 34637 41348 35940 37984 38737 38609 40530 33959 36954 41779 34324 33157 38112 42874 41696 33392 35253 39786 37332 38808 39936 41359 34224 39025 39840 34833 40224 41930 34908 40064 35408 36561 40179 34490 36312 42018 40238 33861 41553 36160 36915 40359 35955 41264 36720 34891 37619 38311 40471 34726 37868 41049 35824 42988 42273 36400 40294 33298 35464 39792 38192 33441 36791 37034 39448 42823 35961 42337 35502 41301 36365 42063 40365 33768 41280 34305 41231 34628 41747 35761 42288 36211 41194 34484 41346 34881 42249 33360 39695 42263 37906 41697 41184 39319 38665 36692 36656 36968 42647 36056 35519 37672 34144 33932 39159 41585 41088 40853 37777 41709 37840 37134 36679 34585 39187 37876 43129 38291 36082 41543 34744 41855 37586 40727 39604 40215 39200 41369 34781 38576 39980 41000 35250 41665 36604 37159 42789 35409 36937 35436 42336 38473 33559 42633 38568 35985 42760 38810 34592 34224 35847 33696 37696 34808 42540 41358 36440 38287 37365 33296 36618 36898 36032 36880 41756 40921 41000 39265 42176 31376 39140 32044 38668 37587 41157 39968 34950 40931 48448 45890 37586 33220 37398 41790 34695 41132 35104 40777 41453 41595 42129 39433 41170 41909 41152 28774 31105 34724 42466 41472 40809 38034 39181 41909 32680 35608 43274 34592 39209 42827 36516 40488 33936 35476 37421 36012 40786 39744 34731 33824 36749 38489 32849 40212 40816 36199 38852 33335 33416 39524 39600 41531 39156 42049 41233 37909 34413 39687 34273 35888 38580 40677 41386 34236 35515 39525 41232 37658 38224 32976 39820 38656 41261 34112 36311 41774 35431 35984 43176 42149 39541 43048 36947 40823 40864 38032 34944 40043 38956 36260 40945 39897 34419 39444 40604 38544 37512 34977 37389 40640 36192 41424 35099 36184 33097 38773 40458 38937 36332 40540 39291 42113 34534 33408 37021 40412 34244 40021 37481 33698 42384 38922 36620 41719 34158 41688 36981 33920 34917 36640 38419 35147 34036 41728 42112 34602 37164 37157 39965 38564 41284 37901 34984 41420 33867 33846 35656 35451 37653 35648 38052 34531 35177 40156 42873 42554 38194 36490 40707 38656 41909 37719 37784 40280 33217 40067 34952 33400 37552 41728 36482 42485 37505 34728 39848 35916 39149 33528 37026 41970 35480 41656 35160 39815 33783 39908 34387 39927 35063 39415 34152 39809 38422 42560 37474 42444 38633 33251 38691 34486 37765 36112 38612 34118 38603 33736 39168 33664 37836 34400 38375 42441 38400 41991 35611 42304 35345 41136 34294 40365 33812 41760 34944 40818 34003 40420 34413 40036 35453 40167 36137 42106 37474 41408 34910 41388 35943 35156 39552 35271 38856 35049 37552 42852 36225 41955 33280 39609 39116 37240 40272 36075 33393 36561 43790 35250 37856 43752 40153 39072 37456 33808 36932 37536 35239 38500 43481 41504 36450 41139 41742 41232 40400 36141 33466 38816 35200 37914 36483 36592 36183 39885 35624 33318 40980 42919 33365 37751 36933 37664 35403 34916 34674 35280 33872 33984 42061 34325 35930 39042 39015 40308 39561 39943 36368 36569 42752 34852 41002 33501 42752 36198 35670 38468 36593 39914 35309 38528 34740 35159 33297 34066 40483 34640 40017 35440 33883 39404 38400 41377 38209 42612 37443 42097 37348 41369 37800 38715 40589 36642 42048 38708 42821 34560 37392 38896 41968 39534 33152 37717 36379 35619 32513 36896 35680 36920 42272 37539 37002 35127 36230 38722 41079 40032 37240 34151 41091 36027 35788 41847 35760 40448 35536 40557 33250 34765 40204 35978 38480 38033 42081 41824 32836 35920 34604 39367 34469 38208 41730 37824 37764 35683 42161 40246 34048 35697 42453 36089 40469 33245 39112 41748 39109 39808 40032 42407 43042 40596 38332 37876 36070 41180 36661 42839 38016 40968 42514 43008 38701 40072 33502 38592 36049 36128 36265 37467 41184 39063 41607 38560 36492 39978 37613 33483 35477 42852 33965 36732 39200 37644 34584 41063 36839 38631 40032 32966 34414 34346 37029 37418 32726 42098 38087 39208 37517 41767 34354 35751 38988 41657 35053 36696 39429 43105 36793 37270 35492 42497 41602 42995 36123 37184 33484 37395 35596 32827 39137 40681 40740 42864 38411 33591 39028 40472 39800 38100 36592 41144 36971 33367 38572 41066 35549 34904 38992 36388 37232 40888 36634 34539 42240 37868 42424 33711 37377 40410 37369 39328 42135 34368 37386 35715 42536 41655 34662 39717 36177 33067 42357 43540 39108 43081 42572 36170 38659 39737 32769 37943 33808 37792 39288 34712 41736 38741 47512 41508 36320 34924 41600 40023 39703 39912 40747 40232 42359 37621 34104 36245 42315 36615 43898 42993 35987 41872 38859 36306 35872 33868 39049 42721 33733 41708 41130 39937 40585 36357 34034 38688 34326 41344 37992 35034 42767 39718 37472 35481 42860 38114 36404 37593 43174 39360 41497 34688 34343 38507 42048 37537 34153 35201 36501 42784 34773 37830 33959 36292 37344 35396 41144 35356 39159 35824 41433 38282 36063 39669 33714 34089 41235 36613 38272 39107 34296 34688 41487 34695 42688 38853 33867 39552 35765 40857 35048 37670 42152 36024 41928 34272 39627 34112 40680 35541 40832 34304 33850 36369 34417 37584 36319 40960 35917 41152 33031 38832 41940 34394 40675 38350 37213 40183 37696 37205 40835 35341 41475 41410 34613 40077 41984 35504 33102 40438 38129 36593 39597 37504 37138 40832 41209 34650 37464 37792 42160 33954 34731 40986 42005 35702 36738 
22744 22863 22760 23112 22805 22958 22633 22958 22762 23036 22954 23124 23249 24016 23390 23946 23329 23909 22935 23713 22343 22355 22297 21924 22266 22999 23282 23687 23836 22576 22388 22229 22039 22879 23312 23936 22960 22699 22733 22487 23072 22762 23114 22574 22596 22626 23040 23097 22835 22761 22648 22578 23211 22569 22813 22346 23097 23033 22863 22610 22717 22870 23236 22624 22748 22943 22841 22453 22735 22789 23174 22464 22894 22941 22869 22189 23108 22685 23033 22351 23262 22620 22742 22706 23215 22293 23223 22903 22796 22505 23345 22315 23157 22807 22920 22507 23353 22372 23077 22847 22796 22697 23351 22417 23077 22657 22756 22728 23030 22387 23116 22236 23335 22426 22977 22825 22818 22858 22932 22651 22871 22330 23354 22592 23169 22547 22737 22733 22712 22926 22962 22796 22986 22641 22792 22520 23218 22345 22888 22045 23993 22041 23594 21943 23830 22347 23337 22312 23445 22791 23176 22677 23307 22249 23450 22471 22915 22784 22712 22941 22807 22540 23255 22350 23422 22487 23000 22845 22932 22817 23200 22592 23217 22311 23123 22943 22898 22621 22980 22490 23428 22288 23061 1242 14269 15496 16032 15648 16455 16166 16540 16673 16794 28200 26226 24308 24802 23971 24442 23668 23474 23447 23768 22922 23580 23021 23339 23316 23040 22933 23455 22728 23563 22968 23112 23015 23204 22882 23535 22656 23136 23031 22921 23156 22880 22728 23343 22550 23484 22901 22976 22979 22859 22870 23412 22433 23067 22988 22561 23525 22417 22997 23544 22294 22952 23688 22406 22450 23606 21927 23292 23739 22368 22664 23350 21906 23859 23062 22452 22689 23363 21886 23527 23598 22245 22458 23526 22314 22522 23777 22352 22530 23255 22818 22041 23367 23812 22248 22439 22992 23324 21909 22780 23658 22961 22652 22630 23194 22674 22661 22856 23354 22702 22759 22595 23028 22788 22620 22855 23223 22792 22568 22663 23072 22570 22609 22929 23314 22587 22688 22457 23094 22925 22701 22393 23223 22995 23019 22317 22679 22587 23188 22680 22672 22426 23217 22923 23095 22386 22696 22536 23137 22660 22864 22259 22926 22788 23304 22736 22792 22409 22955 22528 23249 22461 22736 22413 23011 22775 23448 22731 22985 22183 22888 22663 22893 22522 23233 22735 22969 22199 22904 22616 23354 22904 23173 22451 22784 22346 22897 22384 23037 22667 23001 22215 15153 16545 17772 17783 18490 18311 18462 17852 18567 17968 25687 24320 24471 23712 23755 22912 23447 23138 23660 23252 23736 23232 23512 22798 23029 22584 23043 22575 22998 22769 22987 22901 23366 22905 23097 22577 22760 22513 23024 22895 23358 23061 23398 23180 23117 22745 23048 22503 22704 22468 22743 22472 22892 22573 22829 22706 23127 23094 23450 23235 23024 21944 21955 21942 22422 22551 23061 23297 23714 23760 23960 23769 23665 22452 22256 21984 22506 22321 22674 22416 22586 22711 23321 23407 23434 23088 23060 22489 22484 21795 21985 22055 22528 23015 22961 23057 22972 23255 22985 23288 22925 23207 22839 22889 22582 22620 22580 22531 22657 22678 22631 22744 22541 22707 22656 22810 22633 22966 22811 23071 22763 23153 22687 23015 22684 22905 22548 22708 22368 22555 22317 22640 22222 22638 22151 22728 22395 22864 22407 22921 22454 22843 22486 22919 22519 22915 22441 22979 22608 23027 22517 22960 22504 23048 22433 22855 22340 22805 22386 22761 22464 22757 22373 22706 22416 22942 22336 22787 22292 22759 22225 22761 22130 22759 22263 22715 22320 22851 22381 22893 22369 23015 22528 23127 22753 23142 22759 23232 22870 23379 22803 12695 18433 19433 19191 19808 19510 20052 19505 20036 19603 26103 23845 23680 22995 23115 22739 23047 22584 22945 22762 22951 22639 23080 22490 22833 22666 22876 22533 22775 22439 22738 22516 22889 22533 22576 22284 23003 22567 22982 23023 23335 22516 22084 22247 23531 23624 22700 22065 22594 23358 22401 22354 23438 22263 23371 21992 23692 22169 22586 22548 23176 22252 22806 21921 23886 22021 23377 22512 22419 23176 22454 22189 23351 23224 22600 21793 22492 23318 23257 22821 22663 23095 22444 22604 22318 22638 22324 22529 22373 22524 22452 22712 22803 22816 23031 22833 22433 22471 21906 23011 22528 23218 22668 22631 22263 22734 22447 22765 23015 23029 22633 22680 22200 22711 22320 23192 22727 23168 22808 22668 22359 22700 22231 22824 22632 22871 22895 23076 22824 23130 22608 22829 22097 22642 22345 22941 22348 23260 22519 23264 22588 23195 22735 23172 22610 23060 22560 23002 22266 22778 22393 22975 22535 23271 22578 23252 22439 23144 22414 22756 22144 22884 22675 23011 22779 22801 22176 22887 22594 23129 22348 22972 22839 22881 22190 23261 22315 22672 22725 22885 22228 23236 22453 22802 22857 22785 22727 23016 22340 22926 22231 23143 19025 20443 20646 20457 20656 20668 20836 20390 20818 29434 23661 23431 22928 23232 22407 23018 22404 23368 22268 22701 22715 22679 23357 22512 23207 22101 22870 23117 22150 23186 22122 23508 22804 22461 22699 22946 21728 23568 23022 22255 22504 23477 21852 22671 23717 22768 22083 22791 22964 21863 23114 23749 22153 22171 22708 22910 22665 22396 23106 22953 22499 22479 22798 22859 22564 22450 23050 22995 22658 22460 22686 22607 23029 22656 22485 22471 23159 22725 22627 22277 22961 22455 22913 22842 22779 22272 22731 22632 23193 22853 23116 22440 22615 22325 22823 22404 22832 22670 23054 22680 22949 22405 22592 22168 22640 22137 22755 22240 23063 22476 23296 22771 23321 22631 23073 22391 22805 22490 22782 22282 22798 22283 22692 22151 22707 22192 22671 22364 22779 22223 22711 22329 22837 22295 22796 22335 22598 22201 22681 22048 22564 22112 22728 22164 22650 22363 22994 22573 23088 22709 23215 22830 23239 22794 23174 22681 23004 22496 22764 22293 22789 22342 22548 22195 22536 22362 22840 22579 22994 22781 22984 22551 22837 22489 22757 22758 22742 22155 22385 22221 22832 23096 23713 23492 23392 23177 22888 22017 21914 21715 22272 19431 22009 21974 21769 21320 21467 21138 21112 21527 22320 24345 24085 23620 23237 22313 21988 21685 22534 23021 23432 22865 22532 22125 22259 22193 22183 22748 22860 23135 22779 22785 22311 22488 22397 22864 22743 22983 22741 22644 22552 22434 22256 22528 22721 23049 22900 23084 22538 22814 22149 22647 22521 23097 22674 22688 22617 22577 22308 23118 22777 22902 22160 22561 22543 23041 22510 22805 22759 22624 22249 23138 22798 22916 22240 22683 22635 23032 22464 22785 22181 22696 22561 23235 22414 22615 22362 23057 22486 22823 22224 22671 22588 23200 22529 22787 22088 22816 22581 22926 22595 22624 22420 23264 22581 22647 22313 23080 22548 22780 22464 22617 22722 23200 22453 22555 22249 23071 22395 22760 22176 22872 22805 23241 22392 22645 22479 23088 22532 22766 22381 22673 22717 23149 22502 22577 22391 22948 22416 23149 22352 22640 22830 23078 22508 22600 22596 22938 22396 22758 22216 23171 22803 22759 22221 22860 22704 22858 22012 22246 22544 23667 22804 21992 22259 23297 22822 22340 22091 22167 22509 23560 23638 23616 23470 23064 22153 21879 21659 22021 22132 22656 22646 23079 23012 23252 23151 23312 23226 23364 22992 23024 23022 23157 22969 23076 22745 22862 22759 22734 22794 22569 22579 22243 22756 22620 23093 22929 22755 22265 23056 22621 22854 22390 22775 22994 22429 22433 22775 22514 23003 22235 22917 22602 22503 22519 22564 22721 22799 22324 22688 22823 23207 22486 23044 22375 22752 22535 22841 22370 23115 22606 23005 22363 22669 22497 22792 22816 23099 22735 22957 22454 22785 22121 22624 22274 23128 22576 22920 22137 22831 22693 23051 22627 22684 22198 22800 22295 23091 22584 22745 22080 22630 22483 22983 22691 23018 22108 22771 22263 23258 22643 23179 22422 22551 22217 22816 22354 22825 22740 23119 22825 23085 22255 22576 22269 22960 22356 23264 22600 22935 22309 22682 22219 22748 22629 23051 22661 22860 22233 22601 22321 22573 22331 22800 22337 23054 22429 23084 22469 23112 22518 23180 22630 23159 22555 23165 22528 23083 22449 22923 22397 22710 22292 22358 21949 22092 21786 22639 22903 23348 23580 22660 22842 22205 21761 22033 22324 22805 23205 23829 22265 22127 21886 22448 23204 23198 23132 22403 21629 22757 23126 23749 22231 21831 22360 23316 22935 22087 22560 23769 22091 21875 22599 23040 22691 22261 22984 22557 22593 22683 23025 22276 22924 22825 22435 22696 23059 22464 22827 22903 22629 22778 22761 22349 22944 22272 22960 22496 22556 22878 22786 22367 23165 22336 23034 22364 22845 22407 22792 22687 10858 14091 15014 15749 15873 16090 16258 16613 16617 16569 27206 25639 24664 24167 23804 23922 23658 23343 23420 23415 23294 22935 23427 22969 23519 22774 23509 14764 17629 17273 18073 18099 18259 18540 18713 18767 19014 25691 25255 24353 24068 23736 23793 23229 24051 22848 23444 23253 23362 22953 23724 22827 23418 23045 18093 18839 20035 19191 20078 19700 20376 19400 20333 29583 24896 23978 24023 23632 23309 23100 23793 22928 23327 22915 23568 22801 23085 23178 23521 22581 23454 19783 21019 20281 21025 21063 21448 20633 21134 20864 26008 23661 23337 23152 24068 22935 22752 22740 23351 23422 22743 22019 23063 23689 24015 22531 22479 18928 21665 22359 22060 20977 21314 21996 22884 22904 22208 22973 22980 22754 23100 23406 23407 22481 22112 22919 23732 23908 23618 22625 22189 22315 22853 22785 22738 23149 22973 23159 22753 22808 22522 22852 22928 23188 23160 23258 22924 22833 22534 22601 22583 22957 22656 22903 22765 23196 22844 22926 22456 22644 22445 22989 22853 23328 23001 23272 22728 22998 22386 22703 22558 23047 22492 22888 22686 23245 22836 23238 22660 23041 22518 22825 22259 22676 22205 22784 22451 23284 22780 23280 22908 23279 22896 23420 22989 23349 22892 23382 22819 23237 22832 23301 22696 23044 22443 22995 22412 22824 22456 22884 22264 22714 22369 22673 22358 22853 22261 22785 22387 22792 22349 22887 22353 22908 22540 22895 22519 23074 22573 23088 22747 23183 22683 23095 22691 23048 22889 23192 22955 23342 23015 23239 22924 23323 22978 23289 22960 23343 22816 23109 22629 22853 22335 22558 22243 22395 22246 22691 22642 23189 23144 23487 23276 23274 22716 22463 22371 22370 22209 22093 22220 23064 23463 23908 23697 23810 23489 22946 22424 21962 21777 22171 22644 23206 23360 23283 22805 23099 22591 22471 22535 22355 22329 22363 22791 22747 23204 23022 23159 22816 22770 22400 22535 22403 22567 22673 22982 22883 23062 22631 22772 22492 22903 22564 22805 22266 22604 22383 23104 22871 23159 23017 23243 22806 23136 22607 22794 22300 22721 22264 22640 22342 22909 22558 23089 22691 23097 22583 22868 22356 22900 22375 22985 22223 22769 22218 23115 22785 22830 22464 23137 22672 22682 22451 23326 22416 22988 22506 22894 22397 23320 22241 22920 22591 22856 22865 22765 22709 22656 22900 22764 22410 23285 22296 22926 22853 22903 22151 22806 22554 23443 22513 23355 22707 23265 22658 22996 22418 22737 22459 23041 22435 22791 22660 22657 22827 22752 22477 22614 22921 23087 22278 23084 22448 22727 22432 23239 22906 23095 22670 22823 22396 22670 22432 22638 22863 23625 23543 23512 22238 22235 22223 22997 23181 22471 21694 22754 23473 23242 22041 22176 22550 22648 22864 23492 23129 22678 21967 21817 21683 22319 22679 23116 23107 23495 23657 23855 23654 23447 22532 22333 22632 22943 22811 22883 23033 22435 22767 22983 23015 22464 22592 22545 22949 22855 22589 22423 23110 22884 22767 22339 22759 22689 22991 22313 23047 22892 22727 22400 23122 22326 23002 22812 22713 22491 22897 22469 23226 22320 22896 22457 22766 22810 22902 22483 23025 22662 22766 22278 23221 22776 22945 22346 22844 22528 23175 13243 14905 15516 16364 16167 16573 15987 16572 16359 31745 26036 25472 24399 24634 23887 15873 17392 18293 18171 18711 18271 18743 18396 18969 18300 26604 24832 25103 24407 24551 15089 19115 19040 20028 19968 20319 19857 19921 19922 20085 26080 25299 24241 23936 23497 24016 20151 20953 20544 21500 21368 21287 20896 21701 21031 26440 23454 24656 23673 22788 23816 21432 21233 23017 22321 21517 22607 22136 21877 23004 21165 24404 22949 22893 23971 22385 23669 22913 23765 22703 23473 22338 23585 22560 23207 22813 23632 22357 23228 22628 23451 23045 23188 23250 22914 22873 23480 22693 22924 23288 22933 22719 23383 22819 22985 23081 23267 22599 22820 22713 23457 22995 22931 22480 23204 22979 23213 23016 23264 22491 22791 22803 23009 22616 23249 22739 23497 22871 23402 22788 23136 22602 22884 22516 22920 22469 22849 22586 23048 22609 23146 22812 23302 22755 23463 22665 23457 22537 23262 22461 22847 22256 23118 22864 23290 22981 23017 22552 22803 22383 23249 22742 23360 22521 22776 22488 23321 22973 22960 22416 22777 22791 23429 22557 22743 22709 23165 22798 22764 22677 23344 22464 22688 22874 23169 
22784 22158 22413 22101 22517 21724 22708 22048 22529 21671 22593 21795 22426 21731 22382 21525 22289 21589 22330 21977 22808 22415 22855 22349 22656 21787 22636 21516 22537 22032 23079 22068 22966 21614 22339 21557 22809 22448 22708 22147 22751 21543 22632 22147 23284 21877 22415 21643 22532 22388 22942 22242 22069 22017 23114 22009 22327 21596 22676 22576 22479 21619 22351 22355 22869 21895 22580 22658 22356 21552 22359 22322 22449 21216 22500 23393 22261 20884 23397 21736 21204 22435 22713 21099 21946 22466 21682 21489 22971 22055 21505 22893 21999 21296 22960 22268 21539 22833 21925 21664 22831 21813 21878 22563 21837 22561 22073 22020 22561 22323 21898 23069 22026 22528 22259 22153 22333 22067 22571 22297 22075 22943 21688 22680 21774 22776 21920 22273 22554 22072 22165 22266 22374 22325 22167 22397 22177 22513 21995 23104 21536 22665 21562 23191 21450 22742 21499 23108 21715 22766 21615 22901 21878 22835 21671 22902 22256 22664 21792 22769 21721 22778 22066 22549 21911 22528 22296 22146 22085 22250 22284 22315 21792 22318 22381 22276 22120 22253 22404 22269 22163 22448 22310 22551 22296 22458 8869 10923 11533 12256 13325 13480 13093 35421 31597 30502 28582 27287 26618 25657 25508 25236 24165 24609 23797 23991 23988 23418 23126 23748 22752 23841 22844 23251 22919 23053 22661 23465 22218 22914 22726 22763 22919 22484 22440 23273 22050 23271 22327 22834 22595 22455 22319 23319 21991 22678 22345 22423 22690 22920 21433 23164 21843 22864 22528 22392 22019 23131 21584 23000 22415 22401 21855 22971 21664 23168 22310 22448 21969 22908 21687 22976 22278 22413 21873 22940 21783 22702 22609 22343 21368 22998 21824 22414 22384 23048 21578 22528 22199 22811 21529 22855 22560 22679 21667 22480 22283 22293 21635 23078 22269 22537 21780 22593 22201 22454 21550 23053 22172 22454 21795 22659 22112 22212 21985 22985 22272 22173 22118 22499 22273 22317 21671 22569 22576 22777 21676 22337 21929 22823 22166 22083 21696 22903 22496 22896 21780 22369 21316 22627 22398 22245 21568 22661 22737 23289 22407 21760 21412 22280 22454 23120 21984 21497 21935 23144 23504 23785 22352 21557 21109 21805 21712 22421 22791 22990 21703 21306 20868 21798 23183 23829 23076 22466 21135 21352 21589 22122 21936 22909 22777 22481 21351 21428 22775 8421 11385 13041 13075 13989 14471 15119 16531 16142 34843 31628 29577 27241 26428 25840 25817 25216 24925 24400 23878 23464 23195 22896 23248 22694 23124 22880 23172 22931 23247 22913 22871 22189 22363 22227 22880 22707 23376 22872 23165 22634 22736 22002 22385 21864 22685 22060 22663 22120 22519 22147 22820 22214 23000 22307 22997 22091 22676 21850 22300 21723 22744 22117 23167 22378 23311 22392 23029 22297 22773 21959 22400 21660 22385 22381 22598 21989 22762 22153 22900 22265 22966 21855 22528 21604 22304 21512 22453 21879 22944 22391 23023 22571 23153 22301 22884 22187 22777 21933 22344 21702 22237 21538 22336 21831 22665 21882 22801 22087 22747 22231 22721 22288 22809 22189 22867 21995 22799 21882 22149 21655 22274 21612 22144 21691 22191 21783 22438 22064 22567 21957 22727 22392 22855 22215 23028 22441 23255 22618 23191 22688 23383 23143 23609 23182 23660 23396 23563 23256 23677 23433 23733 23520 23875 23523 23815 23480 23833 23533 23724 23620 23814 23513 23634 23485 23741 23431 23859 23552 23741 23541 23625 23408 23686 23480 23628 23609 23822 23579 23813 23710 23367 22755 22407 22772 22329 22768 22161 22423 21941 22335 8986 12385 13680 14997 15755 16610 16911 17508 17746 18271 29984 28492 26515 25912 24824 24185 23676 23987 23179 23669 23214 23334 22843 23245 22531 23114 22431 22960 22196 22854 21888 22645 22268 22894 22230 22775 22284 22933 22469 22528 21697 22566 22329 23237 22425 22442 21856 22752 22263 22580 21971 23336 21558 22667 21824 22813 22040 22516 22226 22567 22332 22149 21977 23009 21824 22688 21527 23090 21073 22476 22409 22616 21580 22640 22250 23261 21927 22376 21752 22404 22181 22948 22548 22809 22497 22840 22358 22835 22300 22913 22324 22806 21828 22343 21695 22599 21941 23125 22119 22535 21729 22009 21976 22485 22470 22859 22208 22452 21808 22201 21794 22941 22169 22992 21984 22245 21595 22231 21794 22425 22601 22721 22503 22600 21731 21968 21160 21568 21479 22007 21760 23340 22374 23959 22803 22375 21264 21463 20903 21463 21084 21741 21264 21873 21808 22059 21973 22231 22993 22116 22779 21913 21749 21792 20952 21184 21260 21881 22500 23645 22335 22807 21717 21139 22094 22455 22906 21217 22023 22090 22647 22076 21991 22471 22737 21909 22502 22640 22121 22338 22730 21827 22565 22151 22188 22247 22161 22400 22374 21838 23043 21831 15437 16497 17504 17848 18547 19432 19289 19406 19687 28795 26802 25267 24662 24269 23937 23176 23790 23040 22696 22726 22917 22908 22740 22265 22740 22287 23398 21947 23105 21927 23068 22355 22616 22105 22854 21816 23244 22209 22504 22020 22962 21589 22886 22359 22643 21732 22616 21961 22455 22359 23012 21636 22797 22101 22903 21590 22545 22656 22851 21476 22675 22064 22888 21541 22567 22499 23074 21506 22700 22080 22762 22096 22368 21644 22864 22535 22694 21603 22257 21991 22802 22241 22292 21636 22274 22292 23093 22414 22685 21725 22213 21739 22442 22089 22806 22316 22368 21815 21735 21296 21712 21831 22627 22753 23343 23379 23931 23584 23683 23106 21861 21173 21467 21193 21574 21383 22011 21377 21936 21603 21731 21709 21928 21698 21856 21703 22124 21944 22224 21895 22299 21943 22340 22026 22100 22247 21906 22288 22011 22371 22080 22238 22089 22719 21918 22144 22041 22014 21892 21860 21985 22115 21985 22418 22306 22768 22475 23042 22531 23168 22384 22934 22402 22805 21940 22329 21459 22184 21597 22342 21950 22806 22055 22713 22065 22784 21843 22549 21987 22123 21656 22120 21910 22849 22322 23002 22377 23120 22039 22671 21466 17890 18296 20118 20039 20869 20284 20933 20321 21102 20183 24729 23524 24150 23154 23751 22695 23179 21890 22625 22095 22967 22394 23076 22215 22661 22087 22521 21721 22643 22211 23183 22391 22861 21700 22269 21627 22531 22044 22859 22088 22758 21869 22423 21621 22254 22061 22975 22618 23183 22325 22400 21728 22145 21971 22885 21971 22419 21814 22156 22264 23168 22440 22639 21408 22287 22007 22779 22117 22399 21885 21824 21948 23495 22979 22152 21122 21894 22047 23087 22132 22096 21089 22430 23466 23322 21693 21298 22435 22786 21786 21818 21008 22673 23149 23851 22757 21554 21129 22813 22501 22005 21290 21717 23091 23651 21574 21194 21968 23014 22203 21674 21927 22157 22915 22247 22201 21826 22377 22325 22230 21786 22066 22511 22796 22295 22035 21889 22419 22214 22264 21929 22103 22150 22922 22221 22131 21824 22832 22072 22594 22064 22055 22380 23033 22130 22135 21949 22881 21946 22437 21644 22876 22445 22722 21581 22630 22189 22737 21748 22221 21847 23130 22081 22272 21632 22760 21996 22583 21885 22252 21563 22642 22192 22924 22491 23027 22237 22732 21875 22199 21466 22150 21541 22220 21569 22210 21576 22362 21605 22176 21424 22264 21605 22199 21451 22167 21538 22279 21600 22275 21715 22733 22304 23145 22264 22640 21411 22345 21711 22856 22053 22296 22143 22982 21402 22415 21965 22323 22391 22337 22169 22176 22295 22342 21849 23043 21661 22305 22521 22354 21604 22084 21667 22428 22187 22777 22242 22784 22123 22219 21604 22208 22507 22916 21830 22016 20951 21559 21712 22464 21739 23321 22443 23493 22062 21241 21120 21970 23384 23140 21083 21379 22135 23655 22631 22870 21505 21165 21688 22144 23559 22916 21554 21166 21587 22473 22513 23101 21591 21251 21021 21776 22743 22237 23557 22916 22473 22137 22374 21584 22267 22056 22339 22625 22659 22183 22128 21843 22126 21960 22715 22295 22721 22203 22031 21726 22432 22255 22347 22503 22694 22447 22727 22172 22438 21935 22266 21931 22247 21728 22096 21562 22054 21596 22152 21777 22304 21687 22405 22017 22665 22361 22760 22348 22656 22261 22497 21963 22337 21569 22144 21862 22858 22047 23194 21743 22704 21418 22125 21525 22764 22489 22503 21963 22427 21606 22618 22177 22934 21943 22166 21504 22880 22342 22685 21472 22867 21944 22597 21532 22845 22151 22135 21457 22919 21891 22231 22235 22624 21523 22861 21923 22323 21895 22707 21621 22454 21985 22248 21783 22574 21565 23047 21772 22208 22483 22536 22007 22937 21497 22688 22071 22179 21981 22209 22472 22389 22151 22423 22040 2483 6153 9681 10172 12205 12313 14293 13361 14695 14360 35575 30656 30295 27246 28478 25216 25726 24330 25845 24013 24016 23740 23480 24534 23176 23892 22268 9167 10151 12481 15209 13948 17362 16103 16576 17992 34743 32638 30903 27272 27258 25212 25837 26229 23712 23836 24853 22704 23653 24379 23096 23616 23259 23296 12121 15254 15383 17473 17656 18376 17981 19314 19401 32133 29306 27911 26323 25441 25259 25218 23735 23392 23604 24082 22882 23693 23466 23460 22694 23232 14007 16344 16873 19041 19196 19927 19157 20232 19949 20867 27872 26940 25519 25549 24091 24099 23341 24110 23142 23237 22699 23973 23121 23573 22048 23152 22375 18887 19368 20161 19827 21312 21085 21913 21195 21437 20858 25463 23801 24477 23449 23561 22320 23280 23046 23858 22743 23024 21992 22994 22693 22903 22521 23247 22390 22707 21933 22599 21863 22993 22610 23437 22652 23057 21941 22480 21785 22822 22356 22768 21984 22960 22355 22976 22194 22539 21739 22581 22343 23241 22592 23099 22512 22867 21892 22284 21810 22432 22501 22567 22016 22823 22439 22945 22176 22034 21396 21565 21191 21765 21904 22592 22564 23211 23500 23843 23430 23302 23048 22656 22176 22337 21619 21749 21455 21493 21303 21517 21084 21383 21074 21440 21262 22025 21888 21943 21859 21779 21834 22087 22104 21265 22137 21693 22242 21812 22152 21869 22567 21938 22052 22283 22183 22185 22124 22177 22042 22009 22183 21927 22041 21711 22189 21738 22313 21674 22314 21572 22067 21950 22407 21964 22507 22219 22696 21856 22455 22035 22979 22347 23081 22418 23144 22322 22841 22023 22576 21673 22279 21562 22363 21607 22400 21943 22909 22156 22988 21968 22432 21632 22475 21609 22349 21824 22363 22067 22983 22496 23055 22148 22765 21692 22267 21376 22420 21897 22743 22016 22919 22120 22706 21952 22481 21241 22441 21704 22252 21767 23087 22349 23136 22403 22777 21986 22653 21547 22249 21677 22456 22036 22758 22253 22743 21927 22444 21865 22393 21896 22049 21737 22232 21909 22771 22301 22967 22464 22968 22352 22999 22323 22642 21845 22130 21591 22039 21769 22263 22159 22779 22598 23011 22829 22893 22493 22892 22496 22979 22733 23069 22296 21377 20981 22673 23317 21444 21719 22920 21379 22573 23467 21467 21943 22549 21441 23632 21175 22768 20783 23754 21557 22724 22976 21722 22496 21869 22028 22215 22985 22113 22342 21808 21968 21823 22009 22031 22096 21965 22789 22395 22313 21726 22473 22257 22100 22139 22215 22497 22095 22321 22680 21745 23173 21812 22129 22139 22651 21779 22349 21495 22235 21935 22551 21868 22487 21921 22240 21559 22439 21741 22780 22128 22304 21408 22866 22359 22903 21537 22249 21833 22803 22081 22583 21422 22171 21917 22861 22467 23127 22323 22948 21779 22319 21507 22309 21543 22277 21908 22320 21857 22535 22080 22868 21545 22265 21836 23276 22282 22329 21765 22552 22080 22759 21591 22401 22358 22992 21818 22119 21893 22711 22142 22065 21696 23003 21997 22113 21891 22711 21722 22547 22340 22081 21811 22703 21751 23040 21453 22467 22072 21765 23094 21596 22067 22944 21516 21672 23270 23543 21324 21493 21735 22775 22247 21268 21377 23144 6065 7558 9032 11051 12177 13724 14512 15351 14821 35751 31888 29992 28203 27441 26810 10551 13348 14487 15837 16204 17160 17216 18271 18429 36737 33040 30496 28584 27836 26240 12648 15347 17548 18287 18959 18525 19304 19379 20249 20061 31784 28835 27533 26630 26648 16402 17789 18412 20292 19594 20415 20288 21636 20563 21152 28755 27812 25556 25602 24900 24966 19719 21638 21131 21788 21776 21863 21537 22048 21092 27160 24804 24806 23761 23861 23813 23676 23340 23531 23014 23604 22727 23581 22822 23570 22587 23329 22810 22809 22631 22756 22612 23392 22003 23661 22296 23139 22793 23040 22127 23484 22327 22689 22571 23134 21993 22721 22341 23447 22352 22391 22043 22678 22792 22992 22098 22291 21996 22952 22200 23240 22519 23035 22327 22299 21568 22214 21812 22374 22240 22155 22871 22296 23221 22443 23366 22323 22866 22249 22582 22153 21912 22067 21688 21868 21092 21632 21591 22601 22956 23860 22204 22663 21617 21198 21566 22176 22849 22406 23069 22034 22096 22033 22732 22853 22336 21819 22044 22431 23017 22065 22316 21898 22683 22682 22516 21658 22720 22289 22533 21620 22720 22472 22417 21575 
