# Supplementary material for: An Active Feature Selection Strategy for DWT in Artificial Taste
Source: Hindawi journal article supplement (doi:10.1155/2018/9709505), 2018-01-01
Supplement: f1 [file 9709505.f1.zip › maofengTea-med-1.txt]

43493 43542 43493 43488 51 49 12219 15296 18040 18946 20269 20243 21111 20506 21473 21200 22274 21657 21963 21513 22049 22028 22304 22327 22476 21733 22099 21948 22870 22353 22730 22019 22413 22314 22628 23142 22770 21580 21868 21965 23377 22852 23350 22243 22029 22472 22556 23552 23091 22296 21932 22041 23088 22707 23520 22663 22016 22601 22848 23471 22688 21908 22311 22720 22949 23080 22358 22640 21933 23233 22709 22448 22438 22784 22928 22736 22466 23108 22551 23268 22321 23204 22995 23015 22288 22880 22393 23438 22506 22759 22564 23025 22885 22769 22277 23392 22721 23072 22338 23186 22823 23147 22310 23245 22592 23112 22191 23014 22927 23309 22238 22992 22508 23396 22149 23064 22857 23185 22080 23296 22489 23246 22164 23028 22952 23123 22179 22988 22456 23558 22437 23015 22664 23233 22811 23088 22250 23064 22520 23452 22613 22805 22474 22952 23021 23213 22278 22785 22581 23344 22556 22773 22710 23096 22967 22925 22573 23346 22711 23076 22146 22640 23591 23333 21972 23045 23052 23012 21864 22960 23744 23145 21989 23050 22907 23376 21986 22697 23858 23143 21973 22583 22544 23984 2514 10752 14215 16120 18028 18146 18565 18383 19311 19626 31168 26215 25175 24302 24352 23474 23718 23680 23810 23064 23208 22916 23745 22851 23254 23277 23449 22759 23145 22689 23668 22583 23240 23154 23527 22576 23289 22751 23401 22584 23289 23105 23129 22460 23712 22772 23163 22441 23267 23028 23343 22561 23204 22640 23701 22557 22886 22676 23270 23111 23421 22350 23040 22548 23667 22964 23425 22508 23082 22584 23085 23246 23450 22404 23041 22424 23415 22574 23722 22820 23307 22503 22964 22568 23158 23112 23372 22857 23064 22356 22871 22807 23424 22917 23444 22752 22848 22761 23190 23050 23025 22687 23334 22774 23575 22797 22479 22488 23090 23504 22692 21997 22645 22745 24100 22873 22297 22101 22849 23900 23558 22626 22258 22541 24112 23352 23008 22241 22413 22736 22962 23955 23552 22672 22070 23004 23139 23254 23154 23153 22425 22993 22720 23488 22963 22896 22528 22513 23143 23248 22790 22857 22722 23463 22952 23348 22471 23180 23095 23248 22885 22955 22530 23424 22812 23401 22614 23200 23058 23403 22616 22965 22432 23517 22822 23407 22386 23301 22798 23526 22677 22983 22610 23533 22778 23110 22463 23128 23081 23468 22360 23184 16118 19447 19420 20181 19890 21013 20962 21497 20886 33413 25909 25388 23943 23796 23017 23685 23450 23840 22784 23251 22752 23861 23040 23261 22602 23350 23356 23529 22621 23080 22689 23612 22961 22951 22706 23168 23234 23251 22717 23464 22945 23360 22503 22947 23109 23272 23079 22775 22548 23366 23068 23593 22308 22656 23702 23574 22359 22359 22535 24112 23258 22531 22097 22752 23960 23552 22446 22231 22055 23974 23365 22745 22009 22892 23702 23195 23232 22705 23090 22980 23272 23095 23095 22616 23449 23136 23318 22711 23127 23093 23195 23220 23219 22481 23140 22628 23634 22970 22700 22634 23268 23015 23240 22410 23013 22619 23708 22904 23194 22416 22598 23089 23488 22534 23047 22573 23392 22841 23374 22309 23121 22760 23288 23148 23337 22320 23068 22522 23652 22849 22995 22439 23120 23061 23442 22816 23256 22253 23243 22592 23689 22878 22996 22657 23064 23040 23417 22742 23129 22316 23393 22631 23646 22762 22960 22487 23126 23080 23406 22928 23128 22413 23012 22632 23584 22925 23152 22484 22919 22839 23148 23183 23379 22840 22848 22537 23242 22768 23623 23040 23210 22400 22375 22666 22999 23904 23494 22592 22283 22248 23183 16028 21228 21335 21826 21148 20892 20860 21632 22056 22363 26581 24273 23040 22812 23125 23832 23401 24171 23321 22717 22945 22872 23667 23108 23171 22712 23029 23244 23261 23461 23152 22668 22960 22824 23513 23013 23420 22729 23123 23040 23312 23158 23254 22483 22945 22257 23611 22890 23593 22812 22927 22798 23281 23172 23373 22406 22982 23088 23613 22849 23464 22601 23094 22502 23247 22996 23481 22441 23058 22398 23475 22758 23629 22775 23134 22365 23139 22805 23313 23015 23537 22660 23072 22512 23241 22569 23669 22906 23364 22499 22865 22419 23346 23043 23493 22604 23000 22388 23250 22680 23660 22902 22999 22505 23211 23136 23377 22912 22957 22732 23641 23021 23176 22435 23125 22825 23140 23108 23305 22388 22800 22765 23954 23176 22812 22017 22624 23144 23220 23828 23084 22141 22261 22348 24160 23306 22641 22060 22593 23564 23370 23739 23008 22124 22423 22617 24140 23265 22354 22088 22594 23541 23040 22868 22661 23040 23180 23305 22615 22861 22813 23429 23014 23268 22761 22920 22788 23198 23225 23156 22466 23453 22984 22880 22939 23498 22378 23523 22836 22972 23108 22956 22572 23201 22694 23473 22394 23624 22456 23393 22355 23575 20484 21930 21708 22359 21957 22325 22240 22384 22182 26898 24047 23437 22874 23211 23089 23372 22697 23690 22570 23689 22556 23677 22484 23457 22634 23621 22745 23408 22673 22954 23173 23284 22678 23236 22449 23424 23000 23239 22472 23492 22684 23228 22515 23395 23232 23543 22836 22933 22496 23134 22726 23346 22951 23368 22823 23168 22712 23434 22507 22892 22320 22703 22708 23876 23708 23300 22109 22392 23242 23330 22990 22549 22400 24085 23386 22218 23077 23151 22237 23180 23868 22167 23360 22823 22133 24132 22402 22734 22945 22326 23494 22840 23176 22742 22949 23228 22780 22886 22832 23330 22882 23133 22951 23285 22935 22924 22848 23168 23122 22647 23383 22506 23340 22661 23707 22529 23181 22880 22964 22761 23243 22517 23369 22680 23164 22812 22892 22613 23411 22473 23247 22805 23221 22440 23288 22750 22997 22552 23532 22388 23317 23019 22960 22550 23749 22537 23116 22978 23595 22391 23405 22744 23420 22336 23154 22933 23129 22509 23540 22880 23300 22391 23217 23088 23474 22327 23239 22720 23597 22631 23091 23122 23398 22906 22925 22656 23490 22868 23428 22488 23157 23015 23289 22823 22871 22589 23500 22983 22686 22343 22338 21933 22777 22611 22119 21844 22433 22333 23764 23033 22458 22657 22744 22749 22922 24065 23592 23744 23216 22567 22305 22284 22821 22656 24136 23386 23233 22563 22648 22860 22538 22971 22842 23162 22762 23529 23011 23472 23096 23372 23028 23198 22842 22930 22601 22953 22736 23127 22946 23050 23200 23308 23187 23314 23106 23442 22725 23169 22563 23030 22326 22991 22528 22992 22605 23147 22498 23271 22520 23678 22618 23761 22810 23632 22805 23552 22900 23535 22746 23530 22720 23349 22791 23424 22784 23634 22844 23502 22748 23593 22928 23637 22936 23339 22840 23556 22855 23622 22745 23600 22808 23689 22880 23558 22888 23625 22947 23558 22903 23469 22944 23608 22866 23523 22962 23657 22784 23604 22893 23616 22877 23624 22860 23669 22849 23618 22823 23736 22810 23597 22596 23368 22615 23084 22567 23809 22615 23140 22754 22988 22420 22412 22413 22445 22467 22256 22160 22185 22085 22213 22081 22131 22261 22135 22422 22617 22825 22619 23100 22811 23095 23025 23451 23057 23371 23067 23500 22949 23629 22835 23450 22808 23317 22711 23040 22698 22858 22432 22951 22615 22932 22571 23311 22878 23429 23040 23255 22987 23153 22729 23160 22528 23143 22331 22932 22440 23308 22364 23105 22592 23292 22835 23569 22708 23610 22619 23508 22529 23376 22316 23143 22419 23056 22401 23071 22390 23154 22625 23205 23034 23404 22946 23428 22998 23361 23100 23418 23047 23224 22980 23137 22899 23117 22809 22933 22414 22907 22499 22976 22678 23277 22952 23383 22870 23570 22856 23601 22728 23375 22784 22941 22436 22487 22032 22682 22420 23116 23304 23569 23390 23508 23882 23323 23904 22890 23189 22551 22473 22501 21973 22309 22158 22576 22761 23278 23338 22996 23185 23607 23391 23328 23240 23269 23158 23058 23012 22746 22942 22645 22845 22628 22784 22515 22792 22517 22817 22520 22897 22693 23201 22807 23124 22887 23297 22951 23136 22844 23468 22903 23401 22816 23409 22886 23495 22840 23524 22795 23506 22664 23374 22748 23465 22718 23437 22758 23349 22665 23092 22511 22931 22320 23008 22336 23124 22725 23344 23000 23415 22722 23381 22407 22973 22459 23048 22770 23600 22713 23719 22720 23242 22393 23128 22899 23389 23105 23386 22329 22996 22455 23495 22888 23503 22784 22944 22770 23282 23128 23253 22499 22849 22636 23546 22972 23280 22639 22760 22834 23097 23236 22734 22544 23936 23252 22615 22223 22914 23628 22476 22456 24056 23120 22377 23964 22498 23016 23554 22805 23344 22562 23787 22401 23452 22650 22615 23825 22087 23284 22773 22903 23156 23280 12759 17955 17960 19374 19896 19784 20189 20272 19872 43468 27818 25173 24288 24008 23224 24167 23009 23733 23127 23253 23463 23232 23110 23325 22789 23607 22674 18058 19369 21380 20395 21709 20804 22263 21064 21888 32861 26439 24137 24176 23555 23568 23248 23308 23430 23516 22952 23984 22618 23384 23268 23451 22522 8029 19810 21401 21157 22078 22088 22139 21492 22126 21730 28712 24390 24087 23068 23501 23076 23571 23345 23756 23144 23328 22680 23056 22545 23120 22586 23020 17013 21392 21654 22188 21752 22291 21892 22401 21892 22294 24697 23617 22792 23137 22576 23059 22727 23306 23127 23680 23793 23761 24091 23047 23243 22753 22931 21056 21401 22020 22677 23623 22821 23363 22763 22026 21862 23232 23328 23690 24184 23248 23656 22518 22871 22763 23476 23289 23268 22917 23028 22768 23264 23080 23492 22872 23000 22615 23261 23324 23164 22792 22919 22816 23617 22866 23315 22777 22996 22876 23446 22996 23191 22435 23319 22940 23557 22816 23068 22891 23424 22877 23074 22613 23413 22789 23576 22515 23329 23018 23330 22444 22956 22895 23533 22638 23090 22764 23392 22784 23013 22771 23795 22672 22967 22810 23367 22592 23024 22891 23605 22761 23144 22920 23333 22627 23010 22735 23718 22361 23204 23031 23182 22481 23265 22836 23536 22564 23261 23261 23484 22503 23464 22709 22968 22803 23252 22784 22759 22922 23619 22572 23245 23248 23016 22726 23694 22669 22563 23488 22874 22196 22965 23178 22400 22716 23188 22184 22948 23148 22689 22413 23394 22640 22418 23308 22852 22063 23559 23808 22307 23300 23910 22273 23472 23633 22496 23237 23025 22898 22883 23412 22561 23307 23300 23046 22815 23533 22666 23075 23212 22954 22899 23560 22797 23024 23137 23144 22586 23425 22599 22896 23140 23118 22544 23600 22517 23062 23072 23611 22680 23598 22485 23234 23111 23156 22685 23673 22438 23274 22976 23273 22728 23601 22336 23421 22973 23115 22768 23577 22358 23111 23021 23296 22469 23721 22683 23332 22954 23235 22518 23729 22901 23198 23116 23224 22588 23735 22597 23264 22964 23229 22477 23672 22333 23148 23084 22992 22631 23584 22614 22919 22989 23104 22422 23456 22673 22890 22956 23168 22544 23251 22904 22985 22713 23308 22917 22757 22953 23592 22118 23296 23552 22245 23159 23904 22110 23528 23892 22848 22553 24161 22329 22621 23943 22788 22382 24061 22608 22627 23965 23118 22176 24102 22695 22118 23437 22729 22720 23067 23079 22503 23314 22874 22961 22866 23093 22880 22795 23063 23186 22576 23338 22987 22839 22966 23488 22592 23328 23090 22871 22849 23596 22790 22973 22934 23181 22361 23328 22741 22900 22816 23336 22554 23063 22772 23382 22391 23446 23021 23248 22426 23691 22520 22908 22711 23384 22701 22940 22729 23780 22891 23194 22564 23485 22789 22919 22577 23694 22646 23077 22428 23448 23045 23105 22366 23096 22834 23653 22332 23204 23021 23224 22476 22992 22757 23545 22647 23248 22432 23239 23114 23107 22513 22859 22864 23609 22731 23395 22696 23280 22560 23249 22588 23508 22826 23672 23088 23475 22642 22346 22080 22784 23580 23469 23463 22722 22551 23866 23433 23085 21927 22727 23591 23514 429 15997 18469 20246 20207 20602 19550 19811 21052 21228 30789 25485 24816 23792 23738 23608 18062 20648 21248 21130 21746 21623 21815 21527 21847 33977 25712 24512 24200 23595 24133 17432 21472 21437 22072 21913 22826 22077 22152 22167 22657 25296 24216 23813 24016 22882 17224 21286 22240 22000 23098 22255 22533 22327 22841 21916 25828 23957 23692 23157 23588 22744 22690 22777 22736 22547 23058 22266 23470 22116 23372 24780 23717 23442 23216 23016 23415 22560 23736 22697 23502 22752 23307 23055 23161 22808 23117 23073 23246 22686 23273 22909 23492 22489 23580 22500 23205 22934 23006 22816 23364 22521 23146 23040 23157 22913 23213 22519 23165 23172 22941 22608 23655 23015 22530 22505 23127 23708 23005 22201 23168 23088 23757 22490 22436 23157 23250 23745 23204 22141 22267 22999 23847 23394 22874 22061 22393 22950 22824 23977 23533 23640 23220 22341 22615 22976 22773 23135 23193 23204 23140 23218 22709 22902 22528 22833 23114 23187 22797 23552 22905 23622 22948 23356 22891 23350 22708 22887 22516 22923 22399 22896 22378 22873 22534 22999 22632 23288 22601 23274 22542 23282 22456 23191 22672 
22220 22999 22516 21177 22967 22543 21319 22327 22682 21464 21904 22102 22160 21323 22142 22321 21380 21768 22887 21282 21664 23207 21962 21659 23055 22622 21747 22267 22074 22269 21600 22190 22316 22108 22049 22609 22182 21838 21488 21988 21763 22240 21205 21884 21341 22398 21597 22356 21383 21810 21373 22107 21837 22337 21440 22030 21843 22519 21769 22083 21328 21995 21838 22202 21828 22152 21329 22295 21539 22403 21357 22119 21773 22407 21529 21880 21547 22615 21888 22000 21463 22145 21897 21975 21488 22437 21907 22201 21379 21530 22085 22432 21617 21977 21752 22748 21783 21617 22647 22519 21647 21423 21570 23104 21851 21249 21955 22248 22273 21497 21375 22920 22288 21388 21873 22329 21859 21222 21307 23127 22215 21277 21720 22087 22261 21766 22031 22228 22450 21731 21894 21880 22581 22225 21947 21695 22365 22174 22282 21901 21920 21775 22437 21849 22387 21668 22157 21953 22408 21728 22028 21397 22639 21954 22097 21490 22212 22129 22425 21365 22330 21729 22671 21635 22402 22090 22537 21276 22355 21747 22662 21610 22048 22112 22517 21415 22336 21658 22616 21380 22393 21955 22415 21818 55 175 1283 3093 5759 6155 7596 7943 9259 9253 34797 28269 26752 24580 24087 22701 23088 22778 22898 22113 22832 22240 22400 21692 22369 22288 22387 21696 22560 22084 22183 21710 22279 22199 22188 21969 22777 22029 21883 22405 22644 21258 21936 21911 22820 21336 21756 22518 22623 21956 21545 21508 23094 22333 21786 21164 22003 22901 22565 21940 21400 21429 22413 22169 22918 21793 21367 21355 22285 22644 22102 22684 21712 21995 21964 22223 22247 22348 22258 22114 21692 21959 22321 22553 22132 22515 21914 22045 21669 22213 22075 22357 22167 22507 21656 22045 21671 22692 21936 22165 21587 22311 22151 22581 21874 22107 21738 22595 21950 22213 21493 22159 22023 22566 21757 22272 21539 22583 21866 22638 21847 22152 21941 22480 22140 22399 21419 22290 21889 22791 21863 22567 21678 22107 21741 22358 22120 22451 21621 22215 21563 22784 21843 22583 21511 22227 21827 22451 22135 22391 21458 22225 21815 22728 21960 22009 21653 22231 22211 22448 21573 22164 21850 22825 21961 21971 21533 22331 22229 22330 21421 21993 21881 23051 22115 21611 21489 21957 22928 22400 21176 22019 21789 23177 21367 21644 22321 22507 22070 21419 21744 60 5827 9127 9962 11600 12944 13617 14343 14003 13834 37980 29445 25959 24368 23287 23477 22673 23052 22184 22150 22232 22282 22352 22192 21874 22446 22071 22607 21828 22210 22192 22405 22073 22024 21895 22712 22167 22349 21632 22368 22299 22513 21552 22281 21751 22752 21996 22199 21592 22277 22182 22541 21497 22237 21686 22752 21687 22291 22000 22546 22066 22322 21612 22408 21786 22630 21649 22281 21776 22537 22069 22528 21544 22311 21687 22889 21820 22160 21785 22244 22214 22633 21458 22305 21711 22856 21801 22136 21508 22336 22240 22600 21842 22135 21651 22688 22010 22399 21646 22185 22167 22517 21810 22053 21751 22528 21879 22598 21913 22031 21904 22415 22419 22103 21357 22065 21751 23408 21920 21419 21527 21943 22963 22652 21901 21475 21577 22980 22166 23026 21302 21738 22297 22103 22876 22186 21285 21437 21681 22985 22445 22599 21520 21780 22423 22016 22656 21994 22025 21789 22120 22405 22352 22232 22078 21920 22446 22018 22673 22098 22081 21653 22378 22200 22493 22160 22219 21584 22167 21835 22567 22091 22553 21773 22080 21604 22328 22131 22487 22189 22411 21559 22234 21936 22747 21882 22762 21704 22183 21596 22352 22188 8891 13432 15517 15529 16508 16541 17625 17029 18359 17514 29487 24871 23977 22836 23120 22577 22943 21958 22449 21935 22471 22000 22768 21708 22250 21756 22420 22232 22807 21687 22208 21616 22518 21902 22810 22010 22186 21649 22353 22320 22648 21898 22191 21692 22453 21776 22703 22016 22305 21722 22105 22233 22663 21594 21899 21627 22573 21994 23060 22067 21600 21200 21876 22848 22544 22555 22004 21405 22401 22023 23266 22432 22204 21228 21570 22096 22124 23059 22604 22295 21698 21255 21579 21762 22962 22417 22289 22240 21730 22148 21728 22473 22183 22293 21827 21877 21857 22107 22400 22468 22176 22092 21907 22376 22004 22802 21977 21957 21942 22301 22193 22501 21575 22227 21703 22814 21963 22355 21554 22149 21941 22529 21902 22363 21475 22304 21748 22830 21939 22531 21590 22208 21853 22497 22132 22368 21447 22349 21739 22923 21929 22501 21565 22356 21867 22564 22032 22333 21624 22572 21987 22492 21681 22263 21988 22540 21892 22341 21431 22716 21891 22867 21883 22136 21533 22292 22038 22553 21864 22166 21821 22840 21971 22339 22295 22323 21702 22810 21629 22326 21794 22387 22112 22080 22230 22299 21907 22587 22215 22549 21934 7756 15712 18781 18055 20414 18563 19921 19072 20625 19552 29410 24647 23201 22952 22287 23136 21649 22533 21605 23001 21999 21931 21783 22912 21677 22220 21704 22645 21689 22565 22001 22351 22405 22057 22279 22167 21702 22446 22449 22277 21853 22529 21969 22180 21558 22261 22208 22772 22153 22476 21890 22231 21800 22125 21777 22448 21997 22551 21965 22467 21836 22317 21888 22145 21598 22586 22254 22848 21731 22266 21795 22601 21848 22394 21676 22823 22072 22185 22024 22368 21526 22805 21997 22304 21885 22503 21691 22837 21630 22663 21713 22304 22267 22113 21947 22311 21936 22698 21964 22432 21692 22802 21741 22438 21946 22546 21970 22247 22205 22180 22036 22114 22199 22298 21817 22417 21760 22556 21570 22585 22036 22183 22196 22492 21557 22881 21890 22102 22828 22382 21481 23160 22233 21604 22677 22810 21149 22662 22423 21607 21643 22427 21396 21912 22264 22325 21291 22043 22864 21764 21793 23244 22244 21435 22249 22432 22089 21842 22256 22308 22458 21632 22291 22145 22381 21800 22232 22341 22414 21916 21976 21880 22651 21922 22016 21831 22354 22358 22354 21634 22241 21851 22809 22059 22119 21824 22365 22279 22301 21688 22564 21863 19033 20189 20960 20425 21521 21123 21765 21068 21545 28791 24100 22629 23048 22172 22951 22048 22567 21649 22259 21588 22322 22079 22544 22125 22665 21540 22218 21587 22184 21961 22725 21760 22864 21837 22853 21976 22601 21857 22507 21808 22185 21674 22404 21910 22311 22144 22408 22331 22555 22326 22529 22124 22496 22145 22122 21565 22140 21654 22070 21840 22384 21370 22731 21879 23016 21959 23284 22426 23048 22459 22761 22263 22307 22096 21996 21748 21892 21568 21701 21334 21453 21365 21682 21568 21737 21614 21783 21740 21875 21981 22048 22321 21813 22263 21863 22225 21985 22273 22043 22389 22124 22288 22069 22513 22104 22487 22160 22529 21992 22560 22184 22440 22264 22560 22133 22501 22176 22582 22048 22497 22148 22550 22256 22631 22210 22627 22215 22528 22323 22599 22164 22448 22133 22576 22181 22497 22206 22439 22114 22437 22103 22416 22000 22439 21850 22505 21644 22347 21555 22367 21757 22520 21702 22531 21837 22307 21611 22183 21561 22251 21703 22539 21888 22450 21937 22610 22057 22647 22051 22858 22080 22781 21891 22644 21902 22331 21797 22200 21600 22112 21670 22212 21783 22501 22206 22567 22441 22455 22709 22299 22585 21409 21822 21683 21256 21404 21305 21661 21220 21575 21632 22256 22451 23040 22510 23333 22249 23105 21847 22699 21735 22377 21798 21654 21415 21312 21767 21869 22149 21973 22467 22008 22415 22308 22624 22182 22633 22214 22725 22029 22695 21976 22709 21954 22554 21795 22168 21711 22103 21737 22416 21838 22419 22121 22621 22273 22568 22352 22400 22068 22589 21722 22240 21670 22234 21645 22369 21904 22373 21825 22679 22016 22789 21937 22903 21904 22688 21771 22345 21696 22356 21445 22248 21680 22434 21507 22349 21806 22554 22121 22606 22184 22599 22156 22513 21947 22455 21865 22453 21661 22419 21787 22377 21684 22277 21680 22251 21579 22071 21623 22072 21687 22025 21824 21991 21737 22157 21826 22167 21754 22038 21815 21987 21815 21859 21764 21712 21471 21649 21522 21840 21477 21653 21416 21492 21286 21551 21271 21736 21637 22123 22298 22097 22950 22698 22229 22087 21230 21399 21402 21744 22027 22261 22343 22441 22562 21936 22145 21741 22184 22120 22677 22272 22180 21794 22345 22104 22359 22366 22490 21879 22168 21947 22743 22264 22545 21769 22315 22121 22439 22336 22567 21614 22217 21865 22800 22071 22317 21686 22454 22223 22598 21589 22771 21902 22470 21558 22438 22125 22274 21779 22745 21659 22517 21553 22828 21499 22503 21506 22819 21568 22615 21506 22734 22021 22183 22086 22224 21573 22784 53 4743 6569 8446 9221 10576 10072 11716 11021 43372 32560 27827 24928 24388 23028 23339 22794 22461 22440 22209 22094 22887 21692 22624 21762 22817 61 7136 11205 13577 14431 15367 14802 16376 15664 16858 38489 30520 25185 24867 22875 23873 22823 22489 22597 21775 22349 22347 21858 22448 22220 21610 22001 2655 12752 15344 17905 18380 17739 18121 18936 18963 19239 32646 26644 24101 23616 22925 23321 22629 22842 22550 22277 21947 22260 22017 22503 22116 22384 22075 11784 17351 18981 19403 20368 19849 20263 19869 20617 20096 28097 23976 23538 22275 22733 21964 22442 21968 22452 22024 22683 22013 22983 21965 22920 21962 22795 17674 20386 20224 21211 21112 21828 21403 21673 21048 29669 23549 23073 22261 23027 22288 22997 21882 22459 21744 22393 22095 22846 22064 22587 21650 22256 22029 22921 21878 22689 21706 22324 22024 22539 22273 22214 21710 22400 22092 22814 21879 22264 21648 22610 22308 22250 21643 22240 22172 22825 21874 22059 21646 22520 22817 22296 21304 21740 22421 23348 21809 21505 22075 22697 22125 21672 21915 23304 21657 21520 21287 22794 22851 21838 21492 23000 21927 21719 21543 22777 22724 21514 22061 22509 22216 21709 22227 22151 22617 21787 22213 22301 22200 21751 22321 22062 22272 21795 22476 22409 22167 21864 22679 21765 22183 22080 22455 21785 22107 22032 22737 21676 22402 22250 21824 21725 22816 21799 22140 22071 22404 21633 22592 21852 22513 21571 22711 21806 22217 21834 22467 21641 22647 22002 22106 21970 22617 21432 22688 21929 22256 21910 22934 21664 22536 22319 22265 21889 22929 21808 22415 22217 22317 21834 22830 21645 22593 22215 22770 21665 22816 21664 22234 22257 22520 21697 22744 21814 22289 21943 22362 21593 22507 21973 22152 22099 22309 21619 22418 21790 22144 22215 22336 21621 22886 21840 21848 22457 22207 21329 23112 21691 21582 22966 22340 21650 23252 21605 21910 23067 22104 21728 23199 21821 21392 22854 21932 21189 22871 21816 21448 22752 22039 21259 22966 22279 21883 22616 21409 22107 22324 22231 21750 22487 22016 21991 22297 22160 21833 22646 21920 22053 22001 22387 21766 22484 22032 22131 22077 22356 21711 22316 21971 22467 21644 22584 21992 22219 22033 22752 21605 22612 22229 22358 21906 22880 21716 22490 22182 22405 21752 22885 21764 22229 22164 22417 21635 22873 21753 22279 22073 22379 21584 22784 21703 22221 22092 22496 21732 22584 21864 22261 21667 22600 21665 22349 22037 22668 21469 22652 22040 22243 21922 22865 21654 22376 22309 22218 21959 22809 22014 22336 22373 22538 21828 22727 21803 22103 22016 22389 21804 22283 22088 22400 21601 22603 22400 21712 22199 23134 21445 21904 22967 21997 21210 22462 21981 21874 21260 22664 22949 21880 21579 23057 21789 21826 21171 22543 23085 21993 21180 22573 22328 22361 21390 22010 22702 21933 22247 21663 22457 22296 22359 21706 22400 22231 22471 22057 22214 22316 22460 22173 22292 21831 22584 22000 22511 21766 22184 22076 22531 22386 22403 22129 22436 22297 22451 22318 22587 22054 22489 21645 22145 21612 22470 21741 22877 21980 22332 21596 22416 22235 22496 21629 22301 21773 22734 21840 68 3396 8030 9551 11266 10880 12189 12057 13647 12899 38134 29658 26755 24109 24309 22944 7838 12832 15143 15647 16590 16669 16993 16981 17319 40266 30104 25957 24907 23273 23736 9750 15463 17303 18464 18329 19432 19348 19815 18856 42240 28841 25806 23683 24100 23178 11124 17363 19387 19272 19608 21068 20881 19631 21204 20249 27425 24654 24608 22096 23284 14197 18994 20987 21699 20447 21835 21102 21663 21819 20919 26523 23274 23016 23252 21622 22822 21913 22267 22956 21896 22635 21984 22685 22090 22557 22265 22599 22069 22567 21872 22704 21868 22304 21908 22289 22080 22060 22086 22502 21764 22601 22135 22068 22139 22580 21680 22437 22016 22188 21747 22345 22215 22233 21665 22816 22017 22493 21628 22193 22080 22768 21661 22244 21683 22806 21991 22457 21735 22358 21971 22457 22150 22395 21517 22357 21680 22848 21866 22893 22016 22251 21654 22099 21718 22287 22176 22458 22116 22926 21538 22272 21423 22292 21792 22703 21714 22872 21947 22757 22058 22469 21804 22147 21749 22028 21558 22158 21712 22418 21767 22093 21890 22565 22035 22378 22230 22244 22199 22241 22383 22301 22560 22384 22885 
21623 22260 21391 21749 21914 21989 21355 22272 21696 21680 21726 22141 21227 21960 21701 21800 21385 22107 21520 21804 21528 22248 21298 21765 21943 22020 21422 22161 21751 21527 21511 22158 21530 21616 21431 22428 21536 21683 21601 22023 21743 21624 20949 22333 21811 21678 21373 21877 21995 22056 21243 21777 21542 22165 21386 21792 21849 22076 21589 21636 21445 22254 21819 21993 21085 21738 21968 21983 22388 21527 21128 21878 21552 22912 22090 21589 21743 21890 21749 21269 21856 21741 21603 21297 21719 21920 22059 21274 21696 21461 22168 21561 21538 21655 21943 21704 21578 21402 22298 21629 21633 21397 21949 21807 21767 21524 22144 21705 21746 21184 21781 21988 22017 21335 22189 21640 21702 21188 21884 21894 21820 21401 22129 21749 21686 21322 21830 21972 21964 21158 21856 21416 22365 21431 21645 21507 21880 21898 21995 21217 21715 21485 22260 21788 21767 21221 21763 21914 22007 21232 21746 21547 22343 21648 21671 21587 22051 21880 21487 21217 22417 21958 21673 20805 21739 22439 21429 21232 22579 22169 21552 20828 21685 22529 21384 21028 22441 22125 21259 20791 21513 22694 22320 21128 12563 16445 19274 18772 18613 18768 19405 19823 19645 38226 25266 23404 22995 22276 21701 22069 21890 22071 21543 21991 22071 22128 21472 21833 21773 22016 21282 21816 22016 21947 21363 22042 21802 21845 21365 21762 21985 21813 21322 22320 21633 21549 21621 22167 21488 21661 21428 22336 21684 21703 21406 21831 21943 22037 21217 21875 21561 22278 21760 21709 21195 21937 21828 22129 21585 21719 21235 21944 21496 22361 21774 21788 21216 22393 21740 22091 21888 22033 21356 21722 21568 21972 21398 22280 21793 21916 21334 21712 21333 21831 21817 22115 21728 21815 21308 21656 21504 22257 21508 21589 21527 21897 21974 22124 21115 21600 21504 22759 21947 21193 21185 21680 22643 22187 20960 21113 21340 22867 22173 21607 20728 21373 22576 22338 21504 21028 21273 21765 21593 22874 21925 21415 20765 21352 22548 21966 21992 21685 21559 21389 21722 22150 22021 21576 21504 21590 22023 21879 21904 21492 21549 21898 21921 21923 21614 21524 22036 21738 22080 21483 21833 21660 21841 21929 21778 21320 21874 21777 21895 21320 21792 21744 22029 21866 21857 21383 22077 21623 22224 21322 21768 21827 22080 21833 21627 21576 22260 21771 21781 21251 21860 10742 18739 18961 19787 19721 20827 20449 20647 20062 20167 26779 23856 22296 22176 20967 22562 21948 22141 21232 21792 21771 22102 21463 21716 21336 22336 21750 21871 21287 21828 21963 22076 21333 21607 21477 22410 21758 21638 21543 22083 21851 21692 21222 22150 21714 22239 21597 21346 21553 21999 22424 21505 20912 22023 21927 21624 20769 21522 22737 22368 21152 21008 21256 22755 22208 21703 20816 21524 22571 22391 21722 21034 21251 22473 22070 22310 21517 21642 21843 21755 22130 21579 21504 21668 21845 22028 21575 21500 21889 21808 22197 21804 21579 21512 21751 21996 22036 21451 21602 21536 22301 21706 21572 21384 21745 22096 22060 21518 21619 21410 22208 21832 21978 21335 21801 21722 21960 21846 21719 21547 22115 21487 22346 21600 21632 21335 21830 22001 22210 21741 21636 21536 22257 21649 22179 21274 21745 21422 21921 22000 22148 21517 21661 21463 22296 21732 22120 21207 21997 21529 22016 21898 22144 21320 21730 21428 22236 21703 22029 21377 21802 21547 21849 22023 22163 21523 21702 21417 22041 21544 22393 21726 21843 21303 21708 21580 21943 22090 22084 21559 21423 21146 21819 21556 22839 22000 21591 20691 21380 21920 21936 22656 19118 19957 19961 20087 20510 20604 21937 21355 22246 29830 22912 21730 21537 22730 22328 22504 21872 21089 21425 21760 22064 21984 21506 21647 21808 22052 21798 22106 21788 21430 21510 21729 22064 22016 21938 21681 21299 21793 21773 22195 21612 21568 21488 21776 21884 22055 21910 21833 21280 21736 21584 22231 21521 21619 21448 21808 21934 22069 21719 21687 21392 21848 21479 22401 21745 21920 21240 21927 21941 22068 21999 21984 21271 21748 20952 22242 21583 22380 21569 21709 21292 22023 21572 21940 21925 22168 21669 21628 21367 21965 21385 22369 21633 21744 21269 21913 21761 22008 21889 22088 21316 21761 21527 22248 21815 22071 21417 21856 21803 22096 21747 21736 21373 22000 21632 22282 21756 21537 21332 21811 22071 22093 21073 21200 21276 22260 21827 22689 21587 21193 20887 21580 22401 22404 21248 20979 21352 22290 22005 22379 21482 21147 21006 21604 22600 22390 21172 20876 21820 22705 22037 21429 21537 21528 22181 21959 21581 21506 21740 22108 21926 21873 21614 21549 21787 21620 22295 21760 21538 21452 21826 21901 21555 21562 22132 21349 21828 21734 21689 21760 21662 21925 21866 21505 22234 21333 21905 21259 22359 21348 21871 17120 20982 21053 21248 21548 21440 21388 21527 21714 21399 23617 22278 22184 22051 21568 21929 21620 22226 21443 22389 21304 22125 21445 22443 21233 22199 21585 22167 21643 21977 21499 21841 21923 21939 21415 22231 21511 21783 21661 22347 21384 21816 21816 21976 21525 21840 21296 21897 21939 22336 22048 22341 21895 21988 21351 21639 21319 21706 21699 21876 21809 22130 21675 21821 21511 21189 21477 22662 22560 21809 20743 21436 22169 21905 21232 21335 22641 21777 21009 22362 21345 21355 22722 21160 21712 21888 21064 22775 22236 21141 22151 21431 22054 21681 21824 21653 21592 22083 21493 21795 21666 22144 21479 21828 21549 22090 21585 21664 21819 21728 22063 21469 22208 21430 22002 21335 22056 21734 21685 22048 21987 21691 22263 21483 21632 21902 21620 21449 22308 21436 21904 21888 21736 21340 22349 21548 21762 21961 21957 21287 22236 21856 21703 21754 22248 21281 21922 21587 22128 21226 21829 21793 21841 21448 22313 21595 21669 21609 21992 21730 21700 21368 22305 21818 21907 21305 21902 21955 22058 21209 21837 21669 22094 21417 21856 21751 22041 21824 21788 21394 22101 21655 22199 21349 21900 21899 22091 21735 21636 22055 22467 21930 21184 20698 21101 21344 21671 22577 22197 21026 20873 23851 22500 21725 23001 22263 22047 21191 21192 20846 21680 21730 21706 22711 22356 21691 21367 21221 21346 21204 21760 21735 22057 21964 22084 21978 21926 21787 21501 21604 21397 21513 21465 21704 21617 22154 21728 22274 21814 22246 21844 22067 21742 21969 21602 21733 21414 21760 21305 21753 21654 21892 21710 21840 21947 22011 22007 21991 21936 22158 21760 22077 21431 21867 21427 21783 21359 21716 21272 21576 21226 21689 21260 21604 21252 21714 21252 21735 21184 21767 21244 21827 21315 21579 21327 21817 21285 21728 21262 21793 21200 21819 21300 21810 21415 21878 21417 21767 21420 21800 21456 21843 21574 21888 21527 21952 21671 22018 21383 21851 21504 21888 21623 22060 21615 22022 21882 22168 22265 22355 22464 22466 22566 22439 22708 22378 22484 22436 22659 22301 22644 22048 22609 21847 22471 21735 22458 21728 21967 21508 21682 21531 22181 21568 22087 21602 21949 21613 21652 21431 21641 21533 21477 21536 21533 21436 21616 21570 21860 21675 22023 21920 22039 22000 22022 21966 21782 21847 21800 21482 21744 21485 21717 21269 21587 21415 21932 21799 22247 21735 22290 21619 22304 21475 22026 21809 21793 21293 21832 21431 21689 21368 21676 21426 22000 21808 22116 21921 22203 21878 21986 21901 21960 21769 21932 21531 21918 21205 21742 21287 21753 21303 21737 21362 21881 21588 21897 21504 22152 21664 22289 21750 22320 21761 22333 21589 22231 21563 21830 21505 21687 21274 21654 21217 21808 21422 22095 21773 22146 21965 21959 22026 21775 21863 21949 21159 21396 20719 21169 21026 21143 21018 21548 21781 22347 22226 22913 21849 22823 21517 22037 21741 21480 21241 20944 20957 20939 21009 20944 21003 21447 21804 21826 22073 21888 22288 21781 22145 21721 22073 21613 21872 22068 21963 21607 21831 21776 21788 21620 21623 21569 21607 21628 21625 21442 21554 21521 21604 21360 21651 21444 21684 21376 21678 21225 21675 21181 21616 21237 21568 21208 21589 21238 21682 21304 21632 21307 21639 21409 21760 21858 21997 21408 22316 21620 22320 21561 21865 21249 21660 21139 21975 21559 21907 21992 22232 21892 22007 21258 21713 21346 22255 21622 22339 21520 21730 21396 21875 21861 22069 21835 21875 21165 21815 21609 22304 21719 21644 21335 22020 21910 22106 21711 21824 21264 21910 21527 22444 21568 21308 22063 22303 21850 21093 21351 22929 21837 21177 21628 22276 21354 21126 21809 21472 21900 22283 21230 22352 21162 22360 21133 22624 21115 22197 21381 21201 22758 21406 21965 21664 21709 21618 17394 17654 18796 18714 18823 19696 19220 19277 19543 29189 24362 23174 22083 22060 22067 21457 22336 21709 21837 21736 21633 22018 21768 21751 21755 21600 10231 18077 19894 19545 20797 19904 20714 20155 21015 20363 26807 23324 22674 22102 21953 22146 21765 21634 21723 21691 22135 21335 22216 21720 21708 21489 22005 16085 19895 20379 21457 20844 20894 20636 21132 21184 21575 24165 22688 21929 22286 21638 22422 21745 22113 21413 21672 21478 22086 21590 21854 21803 21851 21852 19319 20881 21240 21362 21412 21418 21557 21216 21526 32911 23115 22091 22072 21749 21884 21272 21429 20911 21294 20907 21314 21475 22224 22117 22915 22034 22958 20598 21520 21072 20807 21233 22057 22538 21936 21973 24432 21447 21436 20938 21756 22255 22967 21870 21770 21585 21456 21817 21911 22227 21582 21686 21447 21762 22077 21959 21921 21595 21440 21793 21843 22253 21339 21621 21392 22123 22101 21764 21563 21568 21615 22241 21451 21662 21320 21973 22002 21857 21344 21633 21648 22187 21463 21688 21205 22041 21897 21853 21207 21850 21718 22159 21401 21817 21916 21941 21448 21689 21768 22336 21453 21710 21768 21902 21411 21691 21666 22288 21401 21884 21943 21814 21317 21744 21707 22339 21451 21781 21852 21911 21312 21881 21674 21989 21274 21968 22027 21812 21303 22138 21552 21697 21474 22107 21596 21561 21752 22244 21568 21710 22008 21849 21288 22171 21543 21533 21605 21956 21179 21745 21995 22138 20851 22421 22087 21095 22135 22018 20898 22295 22285 21209 22145 22647 21156 22182 22292 21686 21236 22915 21430 21290 22710 21344 21399 22614 21924 21620 22220 21976 21746 22122 21580 21608 22009 21668 21517 22026 21733 21387 22123 21675 21514 21943 21769 21385 21731 21820 21632 21653 21888 21468 21837 21739 21694 21545 21872 21293 22118 21575 21612 21965 21807 21218 22179 21478 21632 21797 21892 21292 22336 21430 21746 21927 22199 21316 22260 21977 21720 21808 21957 21299 22274 21446 21715 21697 21921 21138 22228 21432 21696 21772 22018 21231 22200 21400 21583 21778 22049 21245 22110 21512 21765 21666 21972 21260 22139 21562 21588 21520 21947 21411 21799 21760 21777 21540 22025 21418 21760 21735 22052 21216 22216 21831 21600 21709 22400 21341 21927 22400 21518 21188 22816 21369 21364 22731 21657 20968 22506 21439 20925 22384 21680 20706 22416 21497 20983 22156 21624 20743 22208 21670 21016 22086 22082 21372 21490 22160 21601 21520 21929 21825 21406 22039 21911 21440 21930 22081 21707 21908 22071 21805 21647 22213 21486 21715 22102 22254 21449 22173 21617 21573 21956 21802 21351 21831 21725 21818 21280 22075 21688 21536 21701 22240 21432 22054 21875 21989 21404 22266 21415 21706 21593 22055 21536 21627 21730 22300 21660 21734 21777 21940 21480 21733 21597 22388 21418 21632 21613 22109 21740 21942 21437 22231 21493 22066 21320 22016 21923 21853 21146 21960 21753 22304 21595 21673 21760 22133 21917 21562 21260 21900 21819 22102 21426 21661 21539 22221 21904 22205 21957 22125 21971 22118 21691 21911 21335 21482 20981 21478 21885 22664 22086 22252 21164 21178 21760 22187 21921 21108 21355 22387 22173 22230 20905 12549 18125 18968 19237 18754 18592 19398 19312 19938 18508 25645 24159 22309 21542 22342 8370 18321 19568 20224 20464 20384 20622 20583 20668 20496 26673 23713 22255 22302 21965 21528 19200 20013 20675 21049 20911 20631 21162 21320 21303 27923 23612 22265 22151 21662 22425 18782 20695 21202 21385 20934 21559 21560 21443 21008 21801 22778 22117 22224 22273 21479 19380 20857 21317 21720 21557 21392 21793 21020 22104 21240 23151 21719 21820 22084 22016 21655 21963 21317 22293 21427 22116 21416 21831 21801 21917 21537 21777 21824 21990 21801 22048 21483 22144 21256 22243 21686 21724 21856 21911 21608 22283 21578 21723 21952 21803 21440 22264 21678 21638 21800 22121 21291 21319 21452 22768 21755 21138 21121 21656 22567 21722 20916 21673 21653 22720 21629 21107 20941 21522 22441 22288 22023 20902 21377 22071 21623 22813 22123 21846 21224 21106 20763 21371 21857 21614 22151 21821 22073 21680 21517 21399 21827 21769 21719 21979 21929 22054 22016 21888 21800 21365 21607 21319 21632 21385 21814 21741 21889 21435 21992 21547 22139 21624 22226 21608 22160 21594 22184 21641 22259 21549 22277 21684 22336 
34695 41132 42166 36120 37496 38439 41715 41237 35137 34691 35540 40104 40486 38164 35254 36055 41708 39952 32936 36154 32992 40896 40960 35972 37941 38507 42336 40320 36110 33134 32791 40022 33262 33901 42192 43200 33332 34808 33892 38555 36000 34247 37228 42119 36616 34980 41775 37427 38625 39000 40657 36032 33265 40025 41865 36178 36846 39291 34021 34119 42260 41627 36817 38481 38872 35752 37943 38615 42560 33456 38834 37335 33292 37413 39411 33997 33344 32807 40555 40375 41749 33690 37489 41273 43337 38009 40977 37346 35819 38979 42407 34144 34921 42024 33300 37386 33520 33864 34727 38679 38551 35958 34969 41690 43100 35101 39128 38758 38771 34944 34688 41376 38471 41458 40833 34501 35063 39602 37424 37248 36504 41874 40057 35973 34960 41013 36757 38112 38154 39488 36864 41988 42673 42641 34856 32715 36960 37287 38592 40119 35520 42902 41530 36294 35852 40150 35888 37463 38747 40217 35831 33408 41952 34554 34816 33772 38793 37216 43103 40352 42870 38289 34901 35511 35726 43048 42516 40379 34298 40135 33371 35753 34976 33197 41366 38144 43150 40231 40604 35717 32836 35243 41490 39168 30007 29478 39431 34477 32597 34052 41088 36191 33895 38136 42184 43413 39089 41252 35393 39144 37187 39301 33515 38361 39371 39814 42641 36899 36000 38263 40597 36520 38305 38065 41644 39072 36337 36745 41636 35847 38227 36452 41109 41812 34448 33429 34184 40185 42840 35091 42038 42010 35126 35218 41991 36919 37971 38810 40124 37323 33594 41095 35704 35332 39895 37844 36533 39788 33867 35374 40290 37968 42957 42570 36240 36050 39892 42731 35991 39483 37089 38635 41607 35673 33346 37960 41895 41429 36241 37496 41271 35328 41202 36878 36487 39692 35456 36452 40976 34736 32465 40988 32921 33744 33024 37123 38228 39892 39296 33992 32423 36133 37973 39888 39814 34907 34845 40448 37315 39084 41456 37584 40448 34373 34672 41754 34130 41731 32792 37705 40576 35972 33945 37322 37648 42168 35456 41320 33824 38084 38408 35077 33540 41680 35681 39952 38710 33697 32407 33671 38547 37376 37200 42854 33824 37172 37521 37625 34359 32824 38499 35738 39034 43024 36901 34706 36540 37673 35864 40906 37248 35872 37292 41004 36131 35556 38727 37096 36836 41760 39633 34592 40572 41269 35954 36526 39075 36699 34507 33512 41099 36121 35950 40218 37027 31221 33817 36199 35414 34465 35869 42209 34145 38326 39750 38215 37801 41440 40352 37840 33815 37815 40195 40274 36122 35932 39502 42811 35559 41168 41984 36054 37248 40821 36630 38181 39332 41370 34449 42640 42961 36304 34347 33284 39149 37033 35112 40128 40153 35412 41197 34326 41192 33591 38601 42822 32960 36423 38697 37858 34305 34945 32800 35703 42072 39381 37668 40307 36376 40480 35434 35487 32880 33904 42565 35687 38004 40338 43609 39498 41760 33299 34244 36640 35977 39755 33983 32444 34476 36689 38638 33879 42890 37369 36179 40568 36439 33836 32626 35744 38450 38730 42633 34244 32886 41473 35431 33507 41411 35883 39258 39180 33152 34120 41751 40733 36691 38252 41429 36475 35465 37904 36807 35500 33383 39576 43232 42371 34105 33980 41235 36768 38493 40678 35971 34231 32884 41034 34636 40231 40684 35862 42226 37737 38417 39953 33202 34641 42577 41680 35724 39619 40226 38773 33248 38168 37340 39752 41122 35653 42066 41306 35515 38706 41578 36456 33463 36688 38688 40244 33184 35017 42016 39083 33359 42483 35862 36690 40986 35492 33737 37829 39445 39342 33728 42182 39527 36725 33403 36978 38359 34065 34251 41410 37617 37648 34769 38217 37354 37387 38792 32410 33248 37556 41648 41371 40141 37746 35522 33131 35713 41744 43920 37216 38646 42182 35760 38887 38248 32736 34496 36008 38840 36277 39575 36199 42198 33115 35297 38859 38410 37760 34912 40755 36230 35967 40517 34384 33287 42490 35987 37266 39113 37529 36655 40409 35728 33592 40912 33104 34125 42170 36385 37843 39238 35611 35066 41476 36964 42897 42774 35946 37332 40337 37912 37927 39127 38825 38228 40661 35896 37237 41040 34216 42368 33792 35243 40708 38832 33699 37609 37680 40178 34938 34340 41642 38440 41788 42497 34487 35450 40428 37681 35693 38521 37162 39288 41044 35831 33137 40921 36712 39275 42209 36945 36391 39267 35895 35509 41794 38585 34208 41177 36114 33091 40960 36547 39295 39650 38544 39802 40757 41452 36756 35260 33764 39686 36709 33778 42327 42770 40288 37746 41412 41553 38848 42656 43104 39680 37968 34063 34136 42448 39752 36472 36408 35498 38702 42327 33418 32841 40212 38261 33968 32524 35507 39589 37765 37065 34336 33367 36009 34184 41472 35717 33065 42268 36659 37425 33490 33400 39665 41577 36680 35584 35036 35435 34752 37553 37049 32692 40807 41441 37515 40489 42521 41590 37531 36993 37673 38438 40146 33526 41952 41972 33443 35091 41858 35408 41177 40564 39082 33554 37529 34283 40665 42552 42901 41123 40165 42567 43469 40553 40881 33940 40165 34724 38177 43202 36913 37609 37862 42186 41321 33194 35942 34742 42080 41863 36568 36341 38150 33135 36360 40599 37442 37836 41794 38944 42135 37600 38338 41653 34724 41067 35416 35064 36986 36265 39773 35124 36548 32908 39608 42880 35264 33584 36140 34868 42183 40488 37480 40165 41498 35036 35795 37596 42305 41565 41824 35904 39349 35233 36931 38318 36615 41072 39408 40256 42538 39218 35001 36224 34568 33737 39169 43072 36447 34630 39629 43025 36743 33511 39242 33864 34407 36460 35339 39212 42928 40775 42447 38731 41448 39144 35712 34988 38640 38438 35240 41400 43154 34469 37324 34246 42296 41796 42569 37452 36997 35548 41317 42449 33641 35514 38016 38048 40872 41267 36912 35320 35840 41033 40728 37690 33913 39532 40361 36740 36034 36584 42304 41999 34312 34677 34087 38240 35509 35008 41498 41735 36680 37392 40982 37624 38016 39078 40148 36937 34800 39432 42216 36952 35968 38800 36396 36059 41655 39783 34856 40604 41621 37542 37453 39547 35840 34216 38896 43425 37979 39548 34592 38880 41322 35136 33900 40448 37995 36352 37944 43704 35952 38853 41555 39282 40001 39877 36352 34708 35394 35192 35680 42024 35401 41648 40410 41481 40187 35687 35674 38987 38214 39296 38384 37694 36196 43111 34304 41721 33146 42471 35401 34120 39936 35489 41051 36588 41130 36855 39142 35910 38024 34006 35468 41952 35724 40908 36087 34569 37028 35415 36467 38002 38848 38836 38627 37671 40232 35656 39333 42452 37387 42213 36336 41728 35496 40354 33799 40074 35227 40311 34157 40044 35383 40104 35859 39476 36000 40428 36680 41006 34048 41227 36647 40689 35513 40424 36193 39694 36688 40765 36416 42115 37415 42121 36119 42080 36354 42281 36975 33681 36832 33165 37580 34934 38320 41816 37160 32583 36774 34435 38949 34530 38457 37302 40160 41560 42404 43376 43539 34241 42989 35829 42400 43719 43255 35273 41610 35094 38649 34492 36803 43477 36041 43246 35648 38315 32792 34706 33120 40256 33587 39344 34087 37955 34404 34375 42217 34688 33158 42554 33286 33104 42103 34311 33398 36708 34944 38594 37456 38912 38459 38656 38309 36060 36871 36138 42780 35814 42933 35641 40451 34032 41992 37952 36358 41245 35930 41280 34513 41302 42960 38923 36296 36043 40871 36719 42355 35337 41497 35095 41970 38576 36214 39608 37618 40821 37376 38304 37522 37992 35913 37700 33303 37464 40027 35951 40773 36049 40965 35845 41433 37432 33815 37142 32577 39735 34669 41203 36021 41553 35856 42020 34171 40960 33880 36450 32649 34931 40448 34746 39945 36269 42202 39892 36124 39831 38352 38200 38699 36192 37097 37984 39621 41880 35182 39408 37957 39392 37959 33408 35809 42102 41063 37894 36914 36938 33066 38632 35832 42659 40720 37152 37461 37208 37698 36999 37766 42520 36525 36411 39220 37080 41216 36195 39837 35603 39200 34439 36844 38984 38297 34304 36586 35655 36045 34164 34326 33410 34060 34311 34264 42085 33616 32743 33802 41216 34754 42148 35146 41286 35211 40167 35127 39754 34208 40249 33581 39780 34036 40247 34999 40742 34291 40935 34696 41792 35760 36707 38645 41866 42010 34497 41461 33779 36886 40134 34848 39112 38401 33715 37272 38392 40973 37301 38752 40440 35424 41225 41683 34578 41868 33041 35284 41656 37363 37024 39195 36834 37145 39656 36646 34176 41256 35699 34400 41252 38634 37540 39639 35632 36248 40227 37600 33232 42896 33705 40826 39504 41913 37040 38770 41656 38138 36821 39680 34612 41047 41675 39267 36391 42438 37607 41452 40618 42113 39748 42305 39504 34600 39079 40682 41862 40068 36385 42032 38444 34628 35306 34034 39783 33025 34616 33651 34910 34173 38962 40032 32876 42983 43592 40960 39512 39184 39270 42568 42026 35660 36725 35559 34168 38284 35809 35880 35957 33794 35818 37448 36582 32631 35454 36384 34677 39346 38057 41511 38682 42260 35348 39471 38000 39901 35909 34186 35429 35152 39977 41514 40944 35529 35218 42736 38887 37572 36699 41674 42680 36332 36634 33705 38979 39626 33931 41216 35368 37650 41516 34604 42698 35936 39548 42169 35002 42688 39560 34056 36867 36374 36929 36893 40448 36475 40311 41669 42176 42385 33792 39793 33198 32098 39917 39669 39252 35960 37241 40472 42444 37225 40924 36988 40883 42918 40950 39952 37960 38708 38560 33456 32645 38121 35744 40160 39171 33648 37472 38279 43936 42880 42634 37326 35924 41419 38775 37285 35865 33735 42129 36683 37560 40964 34096 34899 42377 35867 39348 38251 37574 34138 41953 36263 36731 41369 41668 34578 41448 40128 39712 35808 33639 33258 34257 40883 42754 35095 40897 38385 38546 36928 41184 34420 34208 40448 42875 35239 39910 38970 37413 37021 40105 36963 35429 40264 42072 36691 37552 37888 42384 35328 35664 41717 42810 35660 35670 37405 42040 35407 34574 41109 42133 37511 37999 36459 41029 35748 35308 41912 42792 36250 36865 37568 40826 37408 34897 38340 40617 38114 38806 36378 40981 40181 33426 34888 42487 39984 34177 33434 35616 40981 33614 35239 38498 36919 40635 40530 33600 33113 33920 37781 39851 35789 38552 40104 36312 42784 39760 39016 40172 38595 36579 41554 41717 40270 40014 35258 39240 40486 41552 35209 40176 37969 42271 40976 35844 41152 42152 34809 37408 34236 40739 38256 35731 39754 33959 33929 38547 34758 32941 38442 35688 41742 40144 35113 32798 37782 35881 41648 35778 36472 34101 34442 36882 42662 37024 35801 35188 33238 36789 40885 39927 33960 34072 38092 36561 40016 40501 42968 34391 36085 37098 40774 41952 42499 35912 37738 40677 41115 41472 38404 35410 36085 38000 40896 41299 42624 35623 34984 37426 39088 40949 42397 35177 35799 38384 40567 40710 41985 34258 35723 38784 40683 39913 32960 35604 34577 38006 40440 40274 33749 33638 32613 37831 42050 36518 35530 35794 33104 38470 42181 35741 35692 38816 40016 40837 36884 33850 35270 42274 41728 37960 42413 33360 39496 36676 41672 41729 36229 34601 37269 43784 42932 37338 42360 35033 34396 42399 43320 38033 40136 34456 34803 40375 34983 37675 39360 39329 41877 43044 40240 34144 32652 37515 36468 42010 39130 37674 42144 37928 39270 35448 37272 39331 36512 34668 40665 43189 35648 39505 41400 42667 40687 34369 33564 37752 36293 41527 36888 35638 36416 40379 39521 35104 32928 35010 40819 42358 39223 37284 38388 41997 41651 42408 35496 33882 38976 33138 34325 35328 41498 34875 35512 35782 37709 42763 35880 34066 42363 42360 34372 34198 39655 35860 37760 42482 41328 43216 39328 41126 38492 37691 37033 39297 38048 35950 41354 34267 34728 35420 39896 37799 33655 40219 37466 36619 39541 42240 35059 33139 40784 37351 40839 38202 40035 38328 39816 35318 37476 41376 43044 37927 42848 37632 35010 39270 41329 39705 39833 35693 40528 37636 38898 41718 42840 40704 41109 36888 29734 37744 36484 39343 34208 32148 40832 40280 37083 31655 35706 41410 41863 33672 41856 25952 39200 32860 39511 42489 41680 33815 33125 33944 31671 36352 36228 41441 41879 38452 32933 38680 37979 34215 38151 37024 33728 39319 41104 41223 40448 35383 41348 40336 34954 42768 34969 34448 39713 41847 37253 33616 33297 42165 37760 36313 36474 39696 40828 41329 43096 41141 36472 41028 35541 33472 41369 36262 37856 39544 40479 40856 35724 36443 39225 38451 34767 38096 41123 41659 42468 39879 42147 36908 36272 37615 33186 35664 36281 38375 36291 38670 43046 40014 40397 41296 35219 35447 36679 37530 34088 41296 33932 35442 37696 36385 42085 41536 35227 34325 36039 39769 40978 41376 42721 36465 35970 39041 39000 34656 33905 35285 36689 34880 34517 35425 34460 38823 37340 32936 42880 41488 38864 36736 41491 39520 34605 36714 39896 36885 40111 38969 35287 41749 37072 34346 40006 36768 39232 34859 32962 41736 36716 35852 35481 38329 37779 39021 38407 37032 36147 41602 34458 41056 34312 41542 36629 35765 37059 42395 38624 33542 39981 34442 40704 34252 39840 34112 40224 34597 41222 33723 41131 35104 41674 
22908 22192 23047 22551 22804 22386 23028 22562 22704 22451 23204 22148 22750 22792 22643 22365 23356 22261 22657 22866 23011 22178 23072 22573 22689 22384 22937 22656 22580 22348 23313 22152 22700 22701 23043 22225 22705 22489 23272 22238 22784 22624 23049 22445 22510 22328 23149 22720 22703 22295 22776 22921 22981 22220 22764 22497 23040 22365 22794 22706 22899 22750 22620 22213 23003 22705 23442 22584 22049 22279 22729 23537 23072 22018 21888 22084 23241 22892 23424 22341 21996 22147 22567 23680 23093 22310 21940 22140 22836 22521 23715 23184 22363 21718 22144 22990 22471 23090 22742 22906 22283 22624 22353 22713 22851 22801 22613 22540 22224 22392 22576 22856 22503 23177 22631 22935 22359 22440 22241 22897 22511 22688 22735 23032 22774 22668 22071 22509 22233 22874 22357 23165 22659 22944 22252 22508 22050 22695 22453 22766 22714 22972 22688 22948 22279 22583 22105 22669 22384 23621 23782 23859 23074 23534 23378 24072 23427 23341 23543 23750 23655 23107 23046 24359 23738 22915 23380 23881 23675 22857 23146 24520 23719 22839 23232 23597 23530 22656 23172 24440 23953 23222 22599 424 14803 15832 15604 15777 16446 17029 17237 16897 16980 29536 27055 25687 24925 24520 24584 24616 24272 23855 24444 24000 24130 23587 24083 23927 23868 23631 24106 23751 23730 23349 23768 23664 23638 23401 24119 23502 23505 23264 23904 23061 23589 23309 23913 23047 23776 23424 23972 23061 23418 23102 24028 23392 23432 22982 23530 23645 23701 22881 23375 23022 23976 23329 23752 22944 23591 23168 23549 23445 23712 22997 23322 22395 23797 23296 23719 23061 23321 22791 23621 23191 23581 23456 23669 23013 23187 23137 23441 23099 23828 23330 23571 22919 23206 22945 23370 23501 23527 22810 23207 22997 23754 23177 22963 22848 23290 23698 23632 22597 22771 23074 24313 23561 22838 22247 23186 24119 23696 22880 22435 22812 23578 23585 23302 22359 22757 23399 23232 24071 23561 22548 22347 22997 23701 23524 23416 23073 22751 23070 22877 23649 23158 23204 22749 23567 23221 23332 23160 22959 22870 23330 23003 23568 22840 23215 23010 23287 23240 23252 22709 23173 22972 23616 22887 23153 22828 23175 23235 23113 22601 23410 22868 23613 22724 22957 22760 23318 23151 23258 22592 23431 22780 23546 22705 23177 23097 23465 22850 23029 23278 23568 23059 15612 16439 17718 17965 18425 18080 18376 18193 18918 18682 26371 24498 24062 24307 24430 23641 23915 23562 24103 23388 24049 23153 23607 23497 23737 23287 23275 22952 23729 23340 23387 22855 23337 23408 23598 22888 23214 22943 23716 22916 23109 22931 23299 23405 23367 22575 23054 23016 24100 23078 22507 22844 23164 23829 22863 22887 23946 23475 23022 22171 23072 23788 23535 22903 22312 22680 23583 23468 23383 22289 22738 23354 23486 23520 22664 22535 22935 23115 23319 23179 22589 22986 22796 23514 22868 22808 22970 23033 23211 23114 22631 22950 22769 23478 22983 23024 22521 23041 23188 23293 22641 22918 22749 23535 22980 23170 22420 23018 22869 23301 22935 22953 22679 23333 22761 23463 22743 23030 22777 23307 22955 23196 22359 22887 22577 23505 22982 23043 22537 23047 22912 23273 22763 23021 22624 23178 22555 23497 22850 22938 22395 23040 22951 23372 22752 22866 22677 23269 22589 23456 22896 22897 22328 23195 23043 23335 22560 22808 22423 23099 22658 23495 22974 22938 22528 23119 22880 23026 23029 23148 22571 22696 22748 23175 22722 23369 22816 22683 22388 22792 22901 23012 23628 23415 22154 22053 22529 23358 22954 23674 22891 9405 17263 18556 19008 19206 20288 20105 20013 19742 18994 26017 24247 24898 24122 23915 23005 22740 22556 22921 23696 23206 23316 22720 23216 23136 23300 23172 23052 22712 22854 22859 23431 23177 23230 22720 22839 22758 23021 23163 23098 22460 22856 22678 23517 22951 23197 22672 22849 22434 22967 23104 23196 22407 22880 22577 23398 22902 23250 22482 22937 22619 23056 22978 23281 22486 22918 22390 23313 22733 23160 22550 22759 22426 22950 22912 23225 22775 23155 22364 22832 22598 23253 22574 23424 22726 22852 22415 22807 22614 23068 22932 23301 22409 22746 22083 23296 22592 23399 22559 22712 22327 22864 22971 23145 22752 22803 22642 23022 22710 23159 22400 22893 22769 23001 22881 23115 22378 22698 22557 23391 22917 22991 22233 22522 23065 23247 23367 22903 21990 22231 22390 23717 23220 23360 21801 22771 23200 23129 23328 22517 22032 22374 22391 23790 23240 22890 21889 22681 23503 23327 23024 22134 22744 23014 23068 22432 22573 22574 23140 22860 22849 22503 22725 22617 22797 22988 23090 22460 22675 22503 23200 22656 22828 22777 22983 22306 23218 22543 22815 22935 22619 22560 22914 22465 23136 22449 23195 22388 22986 22291 23176 22539 19378 20114 20460 20388 20716 20773 20699 20603 20591 32160 23996 23100 23437 23031 23386 22809 23499 22439 23265 22247 23433 22284 23224 22324 23493 22422 23180 22510 23189 22667 22932 22647 23062 22634 23399 22308 23118 22551 22903 22283 23201 22914 22948 22408 22985 22822 23052 22574 22901 22640 22647 22394 22615 22548 23033 22775 23239 22972 23296 22936 22983 22300 22369 22232 23009 23013 22742 22312 22196 22708 23766 23515 22428 21912 23324 22718 22441 22789 23712 21900 22976 22557 22135 23406 22948 21993 23208 22379 22517 23429 21905 22925 22466 22999 22690 22920 22491 22590 22912 22592 22631 22462 23066 22556 22635 22608 22871 22837 22441 23069 22374 22967 22231 23143 22299 22843 22611 22715 22513 22737 22416 22999 22166 22970 22674 22625 22679 23191 22123 23067 22722 22678 22528 23087 22153 22833 22615 22857 22227 22912 22646 22680 22469 23065 22140 22859 22735 22873 22206 23237 22520 22593 22534 23016 22319 22745 22460 23281 22369 22577 22510 23048 22645 22645 22359 23256 22636 22611 22245 22818 22826 22736 22296 22924 22604 23107 22412 22464 22402 22890 22849 22800 22165 22921 22560 23002 22384 22552 22871 23051 22589 18692 20864 21471 21506 22724 21849 21276 20739 21423 22233 23706 23842 23232 22305 21932 22311 22438 22368 23481 22790 23712 23023 22293 21772 22239 22607 22677 23378 22701 23143 22755 23055 22598 22576 22400 22468 22339 22471 22603 22612 22724 22730 22908 22944 22841 22896 22544 22725 22257 22551 22221 22592 22232 22634 22567 23014 22359 23151 22456 23228 22592 23144 22557 23104 22513 23001 22477 22663 22143 22660 22087 22832 22183 22917 22261 22327 22400 22808 22440 22825 22628 22842 22448 22859 22445 22851 22438 22934 22327 22916 22314 22790 22572 22732 22496 22848 22373 22215 22254 22681 22223 22801 22274 22611 22242 22817 22272 22550 22312 22693 22327 22658 22224 22528 22177 22684 22193 22608 22255 22657 22171 22556 22224 22505 22166 22215 22102 22119 22055 22187 22217 22403 22345 22639 21927 22136 22223 22584 22437 22743 22918 23108 23030 23357 23083 23417 23045 23714 23017 23702 23047 23559 23041 23531 22841 22951 22837 22843 22769 22724 22605 22657 22908 22512 22717 22367 22707 22201 22663 22211 22484 22285 22745 22509 23004 22720 23147 22474 23142 22353 23093 22288 22840 22130 22658 22337 22493 22162 22784 22455 23041 22646 23053 22752 22921 22616 22896 22699 22888 22630 22717 22364 22678 22049 22522 22218 22699 22320 22999 22453 23044 22576 23266 22506 23184 22383 23078 22427 22945 22339 22784 22256 22679 22328 22643 22196 22626 22140 22584 22104 22674 22346 22758 22569 22947 22769 22924 22770 22761 22639 22661 22416 22663 22350 22621 22172 22432 22326 22609 22657 23118 22784 23513 22706 23478 22466 22885 22018 22521 21615 22193 21942 21863 21804 22351 22432 22858 23000 23213 23580 22812 23431 22561 23111 22310 23040 22363 22535 22444 22452 22240 22439 22134 22555 22374 22781 22712 22812 22845 22801 22930 22867 22825 22915 22903 22752 22721 22759 22727 22686 22724 22616 22672 22695 22708 22679 22535 22698 22471 22621 22455 22737 22446 22671 22356 22729 22346 22698 22464 22771 22373 22738 22403 22700 22458 22688 22632 22743 22695 22936 22691 23059 22528 22791 21972 22577 22192 22876 22220 23054 22413 23085 22595 22815 22345 22589 22196 22828 22569 22896 22455 22755 22048 22663 22250 23187 22530 22891 22254 22541 22285 22711 22791 22836 22115 22489 22341 23113 22576 22909 22183 22473 22362 22737 22831 22848 22067 22405 22452 22997 21920 22343 22861 23256 22021 22061 22288 23483 21819 22396 23515 22256 22222 23204 21847 23265 22251 23492 21700 23183 22001 23457 22327 22794 22625 22164 22984 22487 22359 22624 8177 13015 14667 14543 15204 15191 15250 15793 15936 15504 28003 25555 24736 24577 24288 23560 23995 23257 23843 23412 23272 23266 23205 23343 23312 23153 23222 14596 17144 16725 17642 17240 18436 17657 18185 17912 18449 26134 25542 24420 24064 23732 23653 23639 23605 23181 23863 22890 23458 23168 23206 22795 23761 22855 17877 18813 19540 18871 19433 19224 20120 19620 19736 29745 25188 24160 24175 23678 23808 22876 23336 22932 23398 22902 23744 23058 23632 23070 23655 23077 23509 19917 20875 20615 21240 20824 21298 20851 21430 20917 26188 23894 24154 23380 23978 23143 23868 22841 23677 22711 23042 22682 22233 22325 22551 22850 22959 19376 22073 22656 21717 21497 21384 21004 21690 22153 22929 23818 23809 22683 22578 22336 22209 22792 22976 23349 22619 22923 22509 22919 22969 23080 23120 23309 22461 22704 22784 23200 22679 22887 22426 22820 22933 22926 22751 22740 22560 23175 22870 23284 22716 22619 22528 23066 22802 22704 22411 23018 22709 23254 22366 22759 22752 23016 22588 22739 22319 23248 22542 23063 22192 22964 22934 22905 22226 23044 22660 23256 22256 22827 22796 22954 22185 22743 22620 23191 22458 22863 22842 22884 22231 22908 22664 23175 22305 22951 22773 22993 22187 22807 22614 23098 22220 23002 22894 22776 22221 23067 22488 22702 22294 23083 22702 22647 22644 23169 22328 22740 22802 22809 22153 22837 22584 22617 22249 22956 22585 22259 22866 23047 21950 22853 23536 22590 22477 23795 22435 22770 23597 22374 22306 23768 22506 22336 23563 21933 22003 23859 22435 21871 23024 22576 21781 23134 22446 21801 22860 22540 22531 22848 22759 22248 22949 22432 22445 22534 22807 22394 22616 22641 22588 22550 22722 22284 22800 22561 22738 22192 22991 22673 22433 22677 22922 22262 22991 22551 22541 22633 22903 22226 22995 22192 22876 22477 22787 22281 22990 22223 22770 22408 22715 22327 22912 22119 23085 22341 22604 22599 22803 22109 22683 22563 22802 22263 23137 22272 22777 22423 22784 22217 22918 22325 22640 22461 22685 22219 22907 22244 22627 22583 22848 22089 22999 22453 22624 22548 22788 22273 22897 22471 22572 22634 23009 22205 22930 22652 22440 22647 22983 22151 22869 22784 22729 22351 23123 22258 22501 22871 22588 22082 22966 22510 22044 22917 22652 21664 23151 22359 22075 22162 23088 22147 22374 22923 22330 22160 23052 22432 22285 22983 22464 21894 23132 22473 22168 22958 23274 21924 22893 22963 22298 22803 22725 22583 22437 23023 22243 22549 22865 22546 22188 22951 22452 22455 22829 22588 22137 22907 22424 22460 22454 22778 22264 22743 22547 22965 22101 22989 22656 22695 22560 23159 22396 22744 22745 23156 22117 23074 22324 22599 22203 23041 22345 22528 22529 23154 22423 22632 22613 22781 22124 22646 22426 23225 21573 22573 22506 22855 22316 22521 22497 23230 22288 22443 22315 22961 22688 22759 22053 22999 22385 22839 22148 22777 22615 22766 22212 22544 22272 23087 22317 22656 22119 22883 22744 22663 22343 22469 22183 22513 22307 22655 22424 22676 22400 22455 22104 22741 22491 22537 23377 23085 22873 22170 21920 22289 22374 23369 22056 22183 22601 22935 22989 22151 21959 22960 12578 14495 13922 14265 14884 15406 16399 15905 15377 33442 26976 24794 24729 24302 23831 15377 16971 17214 17967 17704 18323 18240 18423 18101 18516 26325 25016 24832 24164 23836 14698 18408 19652 19690 19485 19593 20096 19539 19751 19731 26776 24469 24151 23930 23878 23148 20462 20828 20895 20590 21449 20773 21149 21040 21656 25677 24385 23505 23751 23268 23920 21009 22198 21751 22026 22156 22347 21621 22284 21527 22546 23274 23503 22896 23182 23089 23524 22671 23325 22682 23641 22685 23334 22630 23169 22883 23223 22587 23140 22659 23321 22596 23426 22407 23105 22684 22871 22945 22862 22613 23152 22604 22951 22799 22679 22663 23187 22642 22771 22519 23249 22521 23062 23385 23328 22243 22241 22553 23900 23006 22086 22336 22705 23686 22976 21964 22245 22455 23749 23293 23088 22114 22314 23220 22998 23584 23047 22196 21972 22157 22382 22416 23505 22927 23029 23096 22535 22692 22246 22684 22506 23073 22697 23169 22865 22899 22611 22643 22336 22623 22343 23132 22592 22636 22729 22717 22986 22859 22916 23031 22878 23131 22730 23096 22572 22999 22698 23029 22534 23018 22602 23029 22549 22951 22372 
21449 21516 24007 22176 21741 23019 23015 21185 22723 22791 21856 21888 23013 21724 21790 22436 22550 21326 22384 22928 21309 21918 23641 21707 21911 23184 22517 22137 22208 22735 22060 22177 22137 22919 22226 22135 22483 22535 22464 21974 22193 22990 22302 22159 21859 22608 22504 22440 21921 22547 22253 22892 21739 22595 22500 22721 21770 22180 21944 22961 22201 22370 21654 22489 22350 22880 22020 22292 21837 22991 22117 22849 21688 22243 21784 22422 22477 22983 21997 22281 21767 22772 22134 23046 21880 22231 21536 23147 22367 22907 22363 22728 21463 22436 21901 23074 22256 22864 21866 22307 21538 22510 22067 22832 22343 22689 21461 22391 21815 22827 21881 23058 22216 22969 22034 22381 21677 22272 22007 22476 22371 22677 22511 22581 21667 22279 21965 22561 21783 22845 22232 22844 21946 21814 21509 21877 22053 22288 23188 22807 23186 22861 22086 21703 21168 21401 21860 22962 22091 23867 22760 22966 22203 21960 21357 21362 21031 22058 22349 22182 23378 22761 23259 22769 22040 22012 21196 21638 22085 21827 22457 22409 22328 22587 22589 22385 22277 21924 22038 21837 22131 22099 22903 22251 22656 22050 79 87 81 501 2079 1847 3211 32231 30753 27449 26687 25296 25376 23832 23617 22903 23812 22618 22457 22113 22611 21827 21792 21435 22444 21497 21556 21534 21898 21052 21436 21005 22100 20809 21253 21601 21417 20476 21940 21442 20620 20400 21147 22184 21093 20132 21135 21001 21805 20071 20480 21406 21632 21358 20376 20032 21003 21044 22386 21048 20213 20219 20721 22131 21701 21248 20481 20616 20665 21185 21388 21333 20660 20860 20737 21008 20908 21541 21122 21296 20813 20817 20771 21120 21315 21473 21178 21256 20545 20929 20784 21598 20846 21697 20608 21108 21105 21449 21063 21138 20601 21383 20801 21798 20810 21083 20910 21475 21177 21361 20408 21505 20710 21973 20935 21108 20635 21309 21268 21512 20413 21111 20848 21963 20928 21641 20690 21202 20611 21504 21365 21701 20459 21181 20740 21756 20859 21959 20793 21195 20600 21496 21354 21816 20684 21166 21027 21883 21064 21258 20564 21079 21344 21768 20992 21164 20676 21920 21215 21596 20630 21297 21392 21657 21203 21141 20857 22059 21536 21143 20393 21303 22036 22031 20919 20368 20741 22648 21544 20917 20140 21283 22309 21628 20163 21045 21204 22572 20858 696 4327 6733 9153 9394 8796 10060 10728 12861 36663 31752 29417 27305 26912 25331 24544 23750 23731 23900 23525 22889 22752 22577 23223 22676 22324 21953 22504 22385 22288 21430 22248 22017 22523 21663 21914 21766 22153 21788 21641 21493 22646 21792 22071 21195 22093 21896 22126 21697 21767 21337 22499 21540 22068 21045 21954 21715 22160 21116 21779 21356 22523 21553 21742 21098 21911 21767 22224 20908 21803 21101 22468 21598 21861 20959 22264 21769 22090 21375 21768 21393 22355 21387 22375 20935 22076 21607 22203 21445 21747 21271 22034 21504 22336 21300 21531 21332 21885 21687 21844 21080 22127 21459 22285 21396 21525 21271 21872 21878 22172 20924 21395 21303 22945 21800 21426 20549 21488 22753 22337 21378 20704 21106 22291 21627 22827 21376 20748 20637 21518 22723 21969 20864 20732 21192 22972 22081 22565 21080 20864 21194 21427 22118 21568 21345 21191 21693 22025 22072 21927 21635 21389 21730 21568 22316 21573 21363 21320 21742 21952 22025 21859 21879 21159 21602 21510 22338 21612 22062 21279 21644 21279 21913 21797 22325 21616 21777 21200 21831 21307 22324 21616 22394 21186 21840 21172 21959 21783 22326 21486 21812 3457 9062 10842 13407 13443 15121 14790 15591 15076 16402 32248 29527 27059 26269 24442 24184 23296 24064 22949 23909 22835 22845 22231 22775 22560 23164 21836 22304 21607 22674 21812 22955 21921 22164 21524 22457 22151 22538 21790 21949 21632 22409 21912 22801 21923 21912 21281 22144 21976 22227 22057 21927 21447 22543 21929 22826 21815 21337 21037 21765 22844 22498 22311 21461 20650 21448 21483 23393 21892 21202 20660 21416 22034 22178 22948 22325 21104 20925 21232 21929 21558 23345 22401 22173 21144 21200 21755 21686 22458 21947 22464 21833 21616 21716 21952 22288 22239 21837 21728 21463 22064 21793 22445 21702 21804 21443 22338 22028 22365 21518 21792 21511 22567 21713 22233 21347 21976 21589 22157 22124 22257 21242 22085 21485 22790 21854 22148 21164 22106 21673 22280 21941 22432 21376 21973 21540 22640 21821 22195 21220 22113 21675 22375 21988 22375 21237 22135 21495 22712 21677 21964 21476 22085 22141 22328 21248 22311 21460 22736 21611 21984 21242 21712 21976 22377 21865 22247 21530 22328 21737 22583 21405 21851 22286 21975 21632 22609 21371 22192 21684 22048 21845 21732 22128 22025 21508 22649 21229 22409 21352 23173 20684 12790 13769 16997 16420 17290 17317 18606 18419 18321 31442 26800 26304 24075 25147 22716 23361 22264 23562 22839 22297 23563 22457 22845 22402 22581 22862 22226 22453 21664 22901 21685 22512 22089 21920 22475 22491 21768 22320 22224 22105 21626 22730 22409 22336 21556 22102 22057 22454 22119 22400 21844 22130 21564 22081 21570 21920 21409 22480 21968 22627 22256 22723 21903 22220 21441 22387 21923 22343 21497 22115 21696 22737 22034 22156 21446 22499 21556 21990 22042 22549 21278 22573 21806 22133 22104 22200 21735 22325 21338 22656 21584 22464 21779 21991 22313 22052 21808 22347 22057 22203 21689 22289 21943 22092 21959 22215 22216 21964 21816 21917 22020 22387 22102 22571 21492 22439 21349 22605 21918 21922 22169 22452 21637 22905 21880 21845 22793 21856 21426 23478 21405 21813 23160 22053 21159 23219 22152 21270 22656 22753 21048 22375 22494 21456 21453 22628 21859 21036 21608 23133 21072 21780 23031 22615 21314 22168 22322 21973 21834 21383 22704 22031 21813 21880 22026 22341 21889 21660 22179 22020 22509 21463 22406 22265 22538 21711 21924 21890 22631 22079 22228 21317 22617 22193 22467 21432 22080 21664 22822 21808 22023 15641 18786 18845 19904 19558 20187 19255 20524 19893 21141 25207 24671 23075 23000 22291 23340 22470 22801 22592 23028 22323 22583 21507 22433 21254 23088 22072 22925 22125 22742 21956 22456 21508 22191 21408 22311 21940 22473 22153 22455 22332 22577 22197 22478 21821 22165 21513 22099 21642 22001 21813 22248 22378 22519 21720 22833 21979 22969 22055 22676 22088 22259 21725 21661 21410 21484 21058 21460 21248 21689 21677 21814 22253 21947 22568 21948 22902 22115 22952 22266 23194 22371 23099 22091 23055 22067 23056 22144 22807 21883 22766 21879 22589 21959 22795 21891 22642 21928 22350 21862 22408 21879 22300 21809 22454 21824 22404 21904 22568 21792 22408 21517 22235 21146 22204 21671 22242 21734 22478 21510 22259 21706 22176 21484 22093 21583 21968 21540 22016 21304 22131 21335 22150 21240 22149 21400 22116 21395 22102 21619 22323 21565 22384 21658 22550 21852 22650 22061 22694 22072 22695 22103 22631 21929 22510 22184 22669 22173 22477 22044 22636 22180 22501 22104 22400 21998 22860 21760 22348 21486 22001 21418 21952 21717 22425 21939 22674 22137 22876 22071 22832 21898 22743 21783 22468 21968 21925 21272 21708 21013 21841 21772 22398 22736 22881 23225 22845 23079 22789 23325 22221 22807 22212 21493 21805 20948 21228 20992 21529 21367 21877 21862 22433 22475 23349 22646 22711 22264 22245 22113 22163 22109 22062 21547 21948 22005 21992 22083 21575 21914 21448 21896 21559 22023 21861 22577 22144 22664 22208 22811 21825 22764 21846 22592 21581 22194 21641 22016 21538 22358 21925 22601 22169 22662 22225 22619 22146 22491 22147 22406 21863 22435 21573 22245 21511 22038 21603 22289 21969 22858 22048 23011 21885 22963 21655 22869 21697 22684 21634 22452 21634 22137 21319 22118 21249 22278 21546 22580 21913 22729 22105 22609 22121 22620 22197 22582 22421 22546 22295 22436 22242 22557 22341 22401 22399 22356 22290 22212 22356 22364 22378 22436 22542 22344 22748 22372 22831 22443 23031 22368 22999 22151 23178 22250 23131 22577 23197 22868 22947 22810 22259 22245 21559 21232 21507 22157 21730 23424 22308 23463 22615 22265 22029 21680 21853 21783 22487 21904 22861 22300 21907 21721 21988 22032 22308 22436 22439 21650 21909 21849 22631 21975 22633 21735 22016 22055 22326 22404 22511 21527 22053 21506 22749 21978 22605 21525 21994 21967 22465 21568 22108 22160 22980 21796 22237 21888 22741 21856 22155 21712 22753 21445 22474 21591 22642 21753 22432 21760 22578 21827 22406 21478 22890 21482 22595 21221 22216 22312 22351 21588 105 455 5481 7302 8997 9744 11120 10805 13028 12144 39226 34297 31597 29144 28782 26448 26672 25223 25023 24903 24493 24127 24139 23272 24370 22895 23773 2899 8608 10290 12957 13250 15407 14302 16338 14960 42082 34260 32041 28624 28693 26950 25749 26468 24336 24871 23830 23673 24601 22746 23680 23571 23431 22182 9104 13680 14321 14906 16899 17397 17777 18063 17856 36154 31319 29504 27320 26290 25109 24782 24248 24143 24153 24065 23852 23898 23577 23586 23076 23355 10487 14401 16281 17703 18144 19116 19092 19906 19748 20325 30405 28093 26133 25741 24777 24668 24128 24149 23686 23709 23163 23524 22676 23266 22362 22956 22328 17207 18573 20472 19804 20979 20073 20916 20196 21380 21037 26496 24744 24482 23503 23810 22656 23213 22825 23590 22628 23313 22213 22841 22469 23367 22893 22970 22010 22637 22016 23287 22475 23136 22026 22624 22497 22869 22677 22886 21799 22832 22492 23127 22100 22392 21831 22964 22648 22682 21859 22193 22323 23233 22119 22007 21787 23042 23401 22098 21260 22170 22836 23336 21673 21744 23163 22461 21640 21686 22870 23753 21829 21276 22585 22895 22429 21543 22448 23689 21184 21300 22919 22456 22249 21927 22680 22481 22227 21863 22768 22216 22364 21848 22588 22583 22276 22071 22947 22140 22190 22044 22768 22038 22179 22199 22948 21993 22528 22618 22631 21605 22849 22085 22487 21836 22759 21999 22339 22295 22807 21577 22809 22221 22233 21839 23117 21526 22558 22356 22379 21805 23024 22289 22297 22417 22490 21681 23072 21787 22361 22272 22679 21669 22693 21872 22301 22016 22757 21672 22695 22177 22247 22038 22682 21586 22704 21848 22551 21744 22885 21756 22377 22064 22480 21923 22593 21954 22196 22221 22829 21822 22558 22410 22101 22224 22822 21626 22791 22379 22290 22272 22669 21613 22820 21989 22003 22449 22712 21104 22844 22220 21568 22694 22346 21429 22883 21335 22299 22335 21833 21719 22680 21520 21391 22663 22528 21049 22967 22630 21392 22743 22743 21179 22908 22583 21454 22548 22117 22092 22152 22636 21699 22521 22404 21819 22440 22533 21730 22552 22220 22089 22478 22696 21688 22490 22311 22355 22241 22780 21725 22648 22434 22105 22002 22945 21607 22180 22437 22561 21410 22765 21862 22248 21917 22592 21561 22736 21856 22347 21993 22558 21748 22257 22155 22568 21516 22621 21897 22319 22091 22656 21518 22784 22054 22345 22070 22712 21443 22544 22267 22411 21929 23026 21669 22503 22367 22423 21609 23104 21773 22357 22198 22483 21504 22811 21930 22174 22068 22543 21600 22373 21896 22228 21724 22677 21843 22328 22090 22940 21838 22627 22439 22218 21824 23022 22316 21826 22585 22228 21175 22341 22398 21989 21065 22997 22862 21590 21928 23639 21717 21283 21959 22638 21862 21423 22355 23543 21776 21283 21620 22989 22995 21650 21520 23233 22479 21921 21901 22188 22853 21989 22144 22034 22528 22412 22069 21885 22423 22296 22432 21835 22125 22220 22617 22145 22252 21864 22889 22057 22551 21952 22102 21570 22093 21544 22220 21619 22103 22001 22356 21808 23000 22039 22947 22101 22298 21506 22406 22103 22659 21698 22096 22263 22903 22140 22313 21548 22694 22244 99 3411 6903 8099 10922 10850 12663 12096 13371 42859 37289 32530 31318 28533 27715 6251 10477 12538 14515 15459 16358 16107 17121 17430 43136 36424 32745 30028 29145 26801 9781 13137 15609 17015 18526 17814 19196 19015 19406 18839 34971 31137 28951 26828 26912 13163 16036 18258 20155 19172 19501 20798 20241 19394 21740 32441 27598 27121 25916 24279 26023 19678 19550 21408 21560 20655 23064 20537 22327 21569 27163 27109 24125 24847 23920 22877 24562 23632 23330 23444 22949 23861 22745 23537 22833 23577 22502 23288 22409 23416 22709 22936 22577 23067 22808 22676 22811 23209 22124 23282 22650 22518 22883 22978 22295 23368 22581 22568 22565 23048 22194 22608 22183 23296 22212 22512 22240 22953 22476 22729 22097 23104 22213 23077 21976 22661 22267 22732 22631 22944 21863 22529 21984 23303 22260 22950 21925 22456 21693 23030 22404 22775 22610 22939 22276 22752 21661 22327 21989 23106 21968 23405 22113 23097 21984 22547 21651 22324 21750 22367 22153 22683 22476 22641 22477 22879 22608 22886 22425 22887 22289 22811 22188 22679 21881 22444 21819 22387 21756 22191 21469 22103 21172 21616 21213 
