# Supplementary material for: An Active Feature Selection Strategy for DWT in Artificial Taste
Source: Hindawi journal article supplement (doi:10.1155/2018/9709505), 2018-01-01
Supplement: f1 [file 9709505.f1.zip › maofengTea-med-2.txt]

43480 43491 43496 43484 54 10193 17344 20279 20917 21869 21856 22642 22253 22817 22436 22746 22510 23014 22608 22837 22432 22916 22567 23042 22598 23355 22747 23440 22712 23514 22810 23541 22775 23483 22740 23596 22631 23592 22516 23490 22504 23180 22382 22948 22324 22951 22340 23010 22419 23154 22566 23314 22805 23398 22919 23322 22896 23384 23022 23252 22664 23347 22416 22947 22567 23168 22812 23389 22757 23477 22759 23647 22515 23585 22572 23257 22484 23002 22336 23121 22358 23031 22684 23312 23010 23424 23113 23360 22999 23193 22600 22920 22520 22984 22763 23393 22940 23528 22798 23368 22832 22994 22560 22887 22725 23431 23136 23321 23341 22856 22380 22456 22244 22885 23242 24096 22477 22561 22076 22637 23204 23545 23880 23082 23115 22513 22025 22653 23143 24039 23013 23246 22370 22156 22676 23445 24002 22713 22301 22230 22505 23670 23383 23298 23055 22648 22793 22808 23560 22831 23130 22604 22824 22508 23201 23240 23092 22945 22935 22614 23180 23011 23561 22744 23031 22567 22944 22892 23435 23027 23265 22556 23198 22948 23488 22285 22906 22393 23117 22964 23389 23015 23156 22338 7109 16130 18552 18409 19154 19175 20116 19866 20199 19603 30605 25399 24728 23513 23836 23038 23492 22744 23446 22822 23907 23120 23595 23145 23419 22448 23303 22735 23886 22930 23197 22567 23402 23095 23153 22651 23696 22424 23515 22672 23664 22821 23196 22772 23077 22512 23812 23031 23168 22551 23543 22868 23381 22628 23316 22520 22989 22893 23704 23214 23500 22816 23222 22665 23133 22605 22978 22561 23063 22884 23381 22827 23152 22664 22920 22659 23523 23219 23509 22857 23016 22503 22941 22936 23385 22694 22654 22520 24054 23219 22402 23344 22919 22149 23159 23968 22646 21920 22980 23401 22608 22288 22565 23624 24083 22901 22129 22564 23632 22792 22617 22056 23602 24020 23158 21969 23605 22647 22460 24022 22160 23419 22440 23072 22804 23324 22688 23279 22727 23317 22468 23453 22874 22928 23271 23160 22643 23249 23042 23225 22634 22887 23259 23252 22581 22929 22711 23572 22795 23576 22931 23244 22711 22873 22553 23030 22672 23124 22784 23191 22836 23122 22884 23168 22898 23040 22784 23076 22808 23103 22514 23000 22274 22902 22528 23354 22672 23481 22857 23744 22612 23464 22436 23003 22315 23353 22970 23335 22972 23127 22457 22853 17225 20238 20103 21123 20352 21352 21252 21794 21202 33098 25141 24400 23656 24307 23127 23620 22663 23510 23342 23412 22776 23097 22905 23856 22768 23053 22732 23524 22578 23137 22954 23680 22436 23356 23036 23301 22456 23545 22766 22950 22914 23279 22565 23338 22784 22952 23012 23053 22552 23584 22840 22968 23136 22992 22774 23541 22445 23450 22750 23073 22848 22889 23095 23529 22816 23593 22327 23367 22392 23606 22733 22727 23654 22327 23060 22200 23698 22824 23168 23366 22389 23093 21958 24058 22219 22779 23757 22203 23319 22289 23760 22447 23321 22728 23355 22746 22880 23646 22459 22968 22103 24076 22314 23408 21996 23868 22589 23497 22476 23639 23009 22959 22848 23223 23084 22962 22995 23011 22976 23073 23154 22813 23044 22848 23277 22726 23121 22761 23245 22749 23197 22543 23443 22513 23111 22672 23421 22544 23137 22788 23279 22864 23007 22643 23473 22680 23156 22703 23362 22791 23000 22905 23152 23009 22887 22695 22983 23073 23056 22597 23097 22944 23355 22519 23403 22670 23517 22435 23387 22284 23709 22316 23276 22674 23202 22957 22988 22544 23031 22849 23277 22792 23444 22446 23673 22634 23321 22805 23192 23069 22990 16480 20917 20788 22340 21048 22095 21735 21888 21925 22424 25132 24468 23296 23764 23307 23279 22907 23407 22784 23786 22379 23279 22854 23136 23200 23273 22584 23446 22600 23365 22892 23056 22791 23225 22784 23584 22437 23155 22880 22868 23126 23451 22473 23277 22765 23015 23111 23240 22551 23252 22856 22953 23144 23308 22505 23211 22682 23118 23146 22873 22703 23275 22876 22596 23360 23645 22074 23031 23042 22241 22906 23927 22317 22741 22888 23338 22040 23444 23814 22624 22327 23020 23242 22180 23016 24020 22842 22440 22616 23533 22584 22222 23377 23973 22683 22221 22662 23491 22688 22088 23361 23552 22194 22725 23004 23412 22473 22664 23351 23090 22784 22819 23128 22912 22883 22980 23488 22936 22848 22741 23214 22860 22706 23031 23494 22789 22784 22891 23289 22464 23178 23063 23278 22445 23168 22902 23128 22432 23328 23287 23177 22305 23101 22968 23013 22567 23313 23045 23273 22324 23196 22736 23304 22496 23188 23002 23521 22320 23176 22613 23392 22619 22997 22866 23558 22567 22920 22548 23384 22689 23046 22304 23612 22806 22976 22440 23186 22791 22944 22409 23607 22610 22965 22151 23419 22768 23040 22685 23744 22707 22896 22520 21425 21659 22384 21473 22688 22315 22784 21778 21912 26432 24162 22737 23535 23239 23332 22556 23276 22877 23236 22464 23634 22996 22880 22620 23448 22602 23062 22995 23568 22385 23504 22833 23281 22491 23411 23073 22992 22532 23255 22808 22995 22592 23614 22868 22926 22508 23236 22842 22829 22887 23556 22679 22861 22651 23370 22486 23256 23123 23121 22341 23054 22860 23170 22376 23344 23580 22767 22792 23357 22749 22420 23715 23367 22034 22835 23127 22072 23213 23910 22201 22976 23140 22214 23594 23156 22163 23224 22150 23367 23447 22272 22967 23163 22237 24004 22168 22859 23241 22214 23912 22505 22168 23493 21937 23809 22881 22340 22984 22934 22681 23539 22764 22767 23137 22664 23539 22608 23079 22872 22797 23079 23236 22512 23072 22919 22913 23287 22802 22729 23216 22656 23479 22749 22892 22950 22882 22913 23328 22497 23048 22829 22997 22980 22900 22577 23396 22561 23414 22812 23053 22801 22966 22728 23539 22336 23110 22802 22935 23087 22857 22583 23485 22472 23549 22665 22920 22791 22907 22848 23384 22534 23328 22500 23352 22950 23106 22721 23105 22608 23587 22148 23232 22838 23015 23012 23161 22677 23357 22345 23447 22775 21641 22236 22451 22521 23027 22236 22983 22045 23042 22604 23588 22671 23547 22448 23863 22518 23341 22873 22918 22965 23387 22407 23255 22624 23048 23077 22856 22743 23257 22410 23603 22557 23168 22764 22909 22918 23429 22342 23340 22636 23179 22926 22992 22552 23389 22352 23575 22448 23448 22855 22848 23164 23117 22853 23278 22344 23552 22806 22902 22905 22819 22980 23253 22587 23218 22606 23095 23024 22853 22661 23329 22389 23369 22948 22995 22817 22854 23031 23152 22417 23220 22518 23239 23157 22516 23030 22855 22634 23986 22166 22878 23200 22399 23841 22557 22360 23473 22254 23152 23913 22392 22585 23488 21994 23684 23287 22297 22756 23053 22804 24096 22129 22245 23395 22244 23064 23808 21964 22720 23321 22126 23808 23073 22333 23121 22439 23240 23688 22130 23064 22968 22819 23154 23150 22688 23234 22528 23202 22886 22932 22856 23159 22630 23429 22759 22958 22837 23057 22615 23401 22608 23345 22896 22980 22963 23226 22632 23185 22722 23022 23104 22980 22417 23373 22427 23329 22970 23448 22904 22788 22942 23328 22490 23170 22621 23286 22945 22886 22556 23388 22313 23480 22825 23124 22796 22951 22900 23448 22323 23192 22720 22970 22964 23197 22297 23405 22272 23608 22580 23233 22812 23040 22690 23516 22282 23080 22662 22998 23111 22876 22705 23184 22536 23591 22327 23177 22796 23075 22950 23108 22568 23396 22403 23289 22903 22951 22620 23373 22300 23563 22740 23004 22759 23190 22542 23586 22454 23252 22817 22964 22951 23353 22491 23193 22556 23057 22949 23031 22874 23446 22455 23545 22672 23096 22782 22950 22676 23607 22348 23104 22896 22797 22877 23416 22357 23032 22648 23279 23063 22840 22699 23172 22427 23533 22725 22997 22755 23040 22560 23527 22205 23078 22886 22962 23351 22286 22746 23287 21970 23924 22867 22482 23220 22724 22347 24091 22251 22754 23205 22312 23639 23223 22292 23237 22617 22948 23847 22231 21795 23419 22064 23415 23085 22775 23328 22215 23369 23483 22332 23169 22284 23104 23542 22116 22849 22762 23005 23212 22707 22647 23250 22644 23504 22393 23033 22935 22798 23157 22735 22727 23174 22464 23472 22649 23120 23011 22797 23104 23008 22090 23313 22413 23499 22680 23069 22708 22999 23063 22839 22923 22897 22906 23276 22647 23392 22347 23579 22341 23320 22739 23264 22558 23218 22853 22970 22700 22948 22990 23317 22581 23585 22327 23392 22744 22914 22647 23091 22772 23196 22221 23609 22453 22949 22852 23189 22503 22876 22675 23640 22557 23111 22316 23232 22912 23268 22768 23224 22272 23147 22681 15220 17673 19723 19255 20159 19524 20377 20080 20893 43465 27776 24960 24549 23780 23982 23574 23687 23225 23538 22983 23781 22669 23296 22450 23113 22477 23080 17757 20262 20677 21720 21400 22209 21382 22125 21418 33089 25141 24253 23343 23464 23078 23696 23462 23479 23232 22725 22615 23004 22927 23717 22960 23700 7398 20071 20679 21776 22064 22277 22197 21613 21478 22628 28014 25344 23248 22850 22632 23719 23804 23559 23418 22738 22311 23349 23426 23918 22695 22208 22898 18012 22538 21776 21261 22082 22864 23156 21964 21752 22848 25159 23790 22755 22934 23664 23169 22889 23028 22976 23635 22760 23008 22757 23280 23278 23287 22660 21432 22386 22996 22332 22606 22812 22832 22429 22507 22775 24134 22997 23128 23062 23254 22728 22818 23015 23648 22698 23002 22720 23433 22930 22990 22612 23572 22631 22897 22630 23393 22929 22991 22572 23622 22476 23084 22348 23491 22917 23200 22388 23618 22528 23021 22563 23383 22697 22994 22599 23567 22594 22939 22666 23346 22704 23121 22770 23613 22567 23202 23050 23271 22183 23459 22743 23424 22473 23239 23075 23024 22464 23362 22799 23175 22368 23530 22929 23129 22317 23223 22637 23236 22335 23492 22836 22984 22753 23606 22391 23004 23043 23459 22487 23389 22841 23063 22425 23329 22797 22856 22855 23529 22489 23236 23142 22965 22583 23597 22633 22807 22923 23112 22396 23030 22929 23207 22062 23536 23335 22264 23252 23684 22022 23370 23713 22481 22871 23925 22577 22073 23452 22942 22115 22795 23092 22637 22210 23495 23120 22171 22755 24000 22576 22359 23741 22752 22029 23162 23040 22432 22895 22980 23140 22452 23312 22932 23064 22566 23405 22714 22678 22821 23164 22762 22745 22951 23079 22528 23353 22972 22803 22901 23596 22530 22922 23103 22965 22509 23353 22573 22900 22916 23219 22253 23296 22699 23255 22323 23303 22730 22823 22801 23495 22294 23356 23004 23001 22632 23634 22529 23198 22957 23620 22330 23689 22480 22993 23024 23370 22428 23513 22596 22942 22936 23117 22265 23569 22553 22928 22836 23113 22263 23485 22607 23124 22368 23377 22572 22999 22759 23373 22504 23156 22979 23303 22299 23381 22535 22976 22601 23221 22389 23083 22729 23274 22379 23345 22911 22992 22464 23507 22492 22829 22946 23096 22485 23014 22855 23141 22397 23271 23075 22863 22751 23610 22684 22835 22821 23149 22632 22673 22994 23305 22076 23212 23652 22864 22392 24032 22505 22085 22404 23448 23036 22329 22945 24131 22604 22296 23630 22828 22256 22506 23255 24000 22564 22316 23677 22884 22146 22721 23367 23905 22410 22184 23249 22844 22912 22402 23285 23067 23124 22531 22817 22864 23354 22601 22951 23270 22857 22459 23228 22898 22897 22589 23174 22739 22889 22711 23547 22594 22727 22698 23210 22804 23052 22643 23593 22568 23004 22545 23299 22696 22897 22377 23291 22769 23212 22384 23225 22991 23176 22311 22990 22722 23642 22236 22983 22758 23339 22951 23200 22437 23450 22646 23316 22213 23238 22984 23115 22278 23113 22732 23516 22624 23040 22859 23378 22976 23058 22498 23191 22871 23540 22396 22949 22518 23424 22923 23234 22574 23126 22384 23328 22759 23463 22784 903 16884 19513 19887 20295 19975 20300 20257 21286 20550 31116 25143 24424 23925 23899 23339 18433 20073 21431 21358 22275 21576 22521 21731 22641 33420 26615 24337 24931 23862 24448 18308 21678 21792 21622 21199 21425 21152 21733 21541 22145 25313 23937 24433 23714 24227 17389 21888 22085 21554 22081 22280 23625 22717 21905 21766 24970 24331 23217 23472 23396 23507 21823 23113 22648 22744 22974 22547 22583 23078 22350 25254 23031 23616 23177 23087 23341 22985 22899 22972 23160 23372 22624 23619 22577 23160 23041 23022 22676 23272 22475 23296 22357 23336 22913 22988 22651 23432 22752 22933 22564 23689 22666 22980 23001 23448 22290 23303 22595 23644 22465 22949 22701 23349 22938 23296 22402 23051 22496 23672 22871 23063 22343 23174 22695 23225 22960 23472 22901 23255 22448 23086 22347 22908 22378 22928 22503 23075 22677 23180 22532 23054 22503 23018 22328 23003 22439 22862 22379 22944 22347 23010 22485 23296 22887 23303 23204 23062 22864 22950 22453 22852 22793 23540 22796 23312 22739 22993 22464 23025 22852 23372 23245 22921 22221 22332 22848 23945 22796 23557 22352 22084 22760 23401 23868 
21703 22455 21829 22720 21893 22722 21793 22085 21606 22337 22072 22623 22110 22535 21689 22289 21460 22306 21697 22685 21815 22723 22011 22294 21800 21986 21521 22409 21755 22506 22028 22505 22114 22560 21978 22613 21623 22242 22133 23089 21895 22828 21564 22247 21223 21734 21540 21405 21248 21297 21063 21539 21533 22251 22227 22577 22659 22583 22873 22349 22786 21988 21858 21815 21141 21456 22065 21841 22308 21910 22423 22197 22357 22325 22155 22171 22092 22048 22072 21787 21997 21688 21932 21753 22044 21952 22495 22006 22637 21841 22520 21733 22004 21584 22035 21673 22389 22138 22519 22246 22298 21849 22149 21541 22069 21932 22522 21938 22826 21799 22491 21847 22233 21520 22520 22133 22572 21763 22260 21488 22311 21968 22813 21903 22764 21710 22168 21464 22327 21921 22647 22040 22480 21510 22168 21749 22779 21719 22489 21587 22108 21703 22546 22197 22366 21879 22230 21638 22516 21847 22763 20983 22341 21374 22266 21979 22594 22137 22832 21595 22210 22018 22665 21822 22549 21918 22122 21791 22576 22272 22280 21786 22085 21992 22768 21824 22356 21744 22116 21838 22481 22322 22300 21742 35 979 6023 6972 8531 8581 10527 11565 11579 11954 34681 28688 26081 23909 23601 22673 22733 22468 22653 23041 22620 23318 22674 21594 21665 21833 23072 22364 22839 21495 21881 22877 22813 21572 21894 22352 21644 22344 22287 22349 21784 22632 21842 22433 22037 22201 21764 22571 22315 22272 21840 22128 22085 22300 22181 22253 21917 22056 21751 22328 22225 22715 22287 22738 22292 22723 22209 22487 21865 21948 21720 22327 22064 22371 21824 22149 21475 22231 22021 22714 22260 22587 21832 22137 21894 22618 21817 22226 21625 22822 21842 22354 21965 22409 21485 22577 22112 22715 21553 22384 21976 22387 21731 22120 22040 22820 22059 22354 21635 22647 21816 22498 21526 22691 22237 22510 21733 22578 21824 22547 22009 22348 21942 22040 22327 22239 21992 22275 22123 22553 21472 22852 21557 22416 22016 22148 21216 22885 21958 22079 21766 22403 22265 22160 21806 22676 21941 22773 22052 22372 21845 22034 21671 22331 21815 22296 22139 22409 22264 22321 22247 22449 22293 22515 22247 22466 22304 22382 22405 22326 22466 22115 22020 21944 21261 21747 21139 21673 21915 22657 22392 23238 21677 22054 21399 21504 21717 22656 22851 22353 22332 62 5991 11335 13057 14850 14171 14269 15095 16397 16798 38235 29046 25354 23749 24016 23238 23442 22052 21873 22385 22507 22618 21971 22280 22320 22353 21936 22115 22304 22566 21769 22397 22448 22262 21897 22291 22076 22083 21987 22425 21949 22108 22041 22260 21890 22466 21652 22256 21867 22037 22241 22274 21761 22724 21752 22202 22312 22217 21949 22592 21525 22576 21730 22577 21766 22159 22281 22157 22037 22388 21769 22327 21636 22876 21459 22597 21633 22616 21764 22453 22081 22216 21744 22182 22194 22345 21617 22817 21464 22555 21784 22657 21659 22594 21792 22474 21773 22354 22128 22202 21804 22211 21978 22285 21904 22365 21939 22198 21871 22252 21971 22148 22080 22330 22077 22323 22071 22311 21757 22415 21748 22740 21565 22408 21692 22755 21600 22389 21756 22680 21542 22416 21600 22755 21577 22375 21614 22753 21582 22413 21792 22583 21799 22359 21607 22804 21628 22375 21728 22656 21922 22314 21943 22351 22203 22335 21996 22045 22444 21824 22016 21856 22670 21737 21963 22095 22405 22416 21760 22791 21332 23184 21162 22376 21695 22342 22235 21764 22393 21408 22806 21776 21760 22694 21279 23232 21384 21929 22147 22308 22647 21620 8849 14420 16278 18105 16672 17876 18407 17683 19399 18476 29052 25768 23581 23255 22906 22483 22660 22034 22788 22459 22117 22069 22497 21889 22628 21945 22181 22320 22097 22235 22169 21918 22417 21830 22454 22225 22088 21920 22473 21725 22661 21973 22216 22244 22055 22016 22699 21828 22228 22055 22336 21867 22711 21721 22351 21974 22318 21888 22767 21705 22336 21980 22395 21561 22809 22076 22115 21713 22570 21482 22560 22060 22179 21799 22451 21761 22278 22017 22795 21668 22497 21815 22592 21544 22613 22204 22349 21500 22378 21959 22393 21498 22749 22144 22414 21475 22398 21936 22536 21574 22887 21962 22122 21534 22466 21985 22205 21779 22831 22085 22050 21795 22521 21809 22254 21961 22829 21692 22209 21619 22720 21685 22258 21994 22773 21556 21925 21874 22493 21609 22516 22247 22331 21578 22273 22077 22232 21683 22695 22224 22367 21712 22240 22144 22261 21727 22652 22338 22272 21557 22365 21961 22479 21557 22473 22417 22486 21329 22138 21977 22585 21661 21721 22679 22773 21512 21691 21680 22633 22038 21449 21953 23247 22336 21477 21543 22324 22256 21478 22172 23069 21589 21653 21684 22602 22016 21428 22320 23186 22024 21427 6276 17049 19046 19077 19089 20751 20941 20205 19371 20165 29939 24562 23057 22949 22996 22016 22527 22151 22695 21955 22200 22478 22549 21831 22617 22259 22086 22009 22685 22279 21994 21907 22451 22072 22028 22350 22529 21636 22649 22083 22403 21724 22405 22338 22344 21730 22368 22021 22401 21619 22567 22293 22167 21649 22349 21895 22129 21990 22875 21789 22293 21720 22513 21788 22205 22142 22788 21733 22765 21896 22459 21680 22850 21829 22265 21777 22577 21461 22775 21959 22242 21712 22601 21568 22789 21757 22369 21860 22185 22051 22722 21526 22483 21785 22464 22125 22204 21690 22568 21650 22904 21498 22431 21912 22232 22141 22401 21633 22438 21735 22441 22149 22135 21984 22407 21703 22816 21521 22340 21916 22353 21976 22560 21600 22537 21751 22516 22056 22147 21725 22509 21682 22758 21708 22304 22141 22037 22229 22551 21808 22345 21796 22327 22151 22040 21916 22467 21755 22663 21833 22104 22027 22153 22073 22647 21747 22306 21961 22130 22266 22046 21736 22701 21504 22833 21657 21888 22128 21868 22576 22343 21863 22724 21318 22819 22365 21851 22387 21365 22537 22726 21310 22224 22103 21703 22952 21616 21799 22762 21153 23100 21875 18763 20631 20408 22007 20962 21016 21893 20457 22285 29535 23479 22736 22448 21959 23361 21446 22084 22554 21466 23062 22195 21624 22528 21457 22200 22464 21756 22221 22174 22033 22316 22046 21860 22528 21671 22624 21912 22251 22183 22151 22041 22586 21780 22076 22267 22005 22391 21927 21997 22471 21693 22679 21738 22323 22025 22237 22231 22350 21796 22596 21598 22720 21949 22206 22050 22192 22004 22609 21636 22331 22037 22139 22208 22576 21713 22613 21601 22712 21875 22521 21975 22215 22055 22568 21531 22528 21705 22624 22116 22242 21721 22576 21629 22824 21552 22743 21873 22285 21915 22779 21508 22380 21984 22123 22160 22537 21593 22448 21776 22628 22146 22112 21751 22635 21596 22818 22031 22236 21681 22597 21645 22885 21761 22532 21820 22327 21922 22678 21541 22507 21909 22095 22357 22257 21744 22631 21561 22865 21769 22496 21677 22637 21577 22792 21660 22499 21858 22349 21763 22833 21504 22309 22010 22103 22157 22473 21616 22471 21796 22368 22313 22083 21832 22587 21633 22779 21966 22311 22082 22081 22140 22504 21688 22563 21718 22503 22253 22049 21763 22585 21731 22763 21816 22321 22077 21786 22530 22505 21313 22251 21938 21794 22949 21609 21680 22659 21412 23292 21440 21785 22498 21509 22415 22699 21430 22324 21657 22124 22703 21663 22259 21697 22196 22884 21212 22256 21861 22045 22980 21597 21180 22641 21139 22898 22320 21486 21883 22404 21462 23095 21880 21941 22362 21815 22266 22433 22073 21805 22337 21787 22595 21991 22008 22215 22145 22087 22607 21760 22069 22179 22163 22352 22147 21891 22365 21766 22490 22215 22026 21754 22620 21505 22672 22258 22209 21920 22267 22179 22536 21648 22442 21968 22280 22274 22265 21953 22559 21750 22411 22193 22221 21800 22385 21951 22678 21537 22401 21921 22245 22253 22344 21597 22621 21697 22468 22025 22266 21033 22665 21575 22829 21763 22324 21849 22304 21853 22867 21540 22410 21922 22195 22019 22466 21803 22720 21495 22827 21809 22474 21837 22304 22007 22727 21452 22523 21723 22567 22182 22120 21977 22356 21832 22784 21504 22369 21881 22350 22241 22119 21738 22639 21577 22823 21543 22404 21879 22139 22295 22092 21795 22566 21653 22816 21720 22420 21782 22375 22183 22176 22120 22176 22296 22368 21808 22529 21747 22604 21818 22438 22047 22266 21769 22145 22364 21749 22102 22151 22008 22193 21420 23188 21636 22578 22884 21561 22441 22060 21594 22381 21223 22368 21965 21510 21879 22579 22507 21862 21301 22839 22165 22755 21681 21429 22016 22729 23065 22249 21317 21316 21614 471 7211 10629 10697 12177 11787 12323 12520 13051 43370 32321 27548 25075 24349 23403 23507 22848 23122 22469 22844 22247 22625 21580 22359 22145 22091 9 7722 12488 14613 15434 16650 16780 17420 17364 17593 39344 29467 25648 24474 22958 23078 22589 23088 22492 23140 22153 22640 21912 22309 22077 22641 22392 2376 13319 16560 17248 18525 18556 19537 18768 19282 18856 32928 26437 24736 23040 23080 22325 23014 22260 23046 22056 22321 21893 22704 22331 22449 21701 22266 11768 18364 18750 20027 19388 20839 20323 20829 19997 20771 27157 24793 22807 22821 22433 22752 22277 22344 21929 22896 21904 22593 21540 22560 22232 22577 21751 18176 20141 21606 20987 21313 21053 21663 21294 21410 29287 24702 22652 22560 22149 22717 22266 22176 21836 22812 21873 22409 21643 22478 22261 22409 21663 22608 21968 22312 21489 22600 22471 22336 21481 22535 22192 22317 21355 22125 22922 22004 21132 22198 22274 22298 21103 22659 22757 21703 21225 22679 22070 21760 21271 22656 22691 21576 21847 23235 21744 21469 22030 22326 21465 21888 22603 23171 21520 21496 22460 21996 22037 21804 22508 22190 22315 21928 22627 21949 22110 21741 22372 22289 21770 22180 22481 21988 22161 22400 22360 21651 22571 21816 22005 22090 22561 21994 22016 22133 22608 21699 22327 22213 22343 21688 22690 21837 22075 22069 22225 21643 22419 21886 22264 21620 22608 22148 22128 21878 22804 21540 22499 22084 22360 21766 22808 21500 22215 21981 22384 21537 22419 21984 22365 21516 22612 21904 22104 21972 22756 21401 22234 22167 22401 21474 22674 21751 22158 21866 22624 21856 22011 22090 22621 21437 22528 22116 22466 21379 22528 21880 22337 21514 22697 21864 22144 22048 22624 21605 22470 22245 22252 21661 22849 21793 22159 22007 22344 21627 22313 21906 22166 21831 22485 21837 22094 22008 22656 21549 22465 22128 22092 21698 22885 21718 21901 22673 21896 21309 23024 21764 21655 22867 22035 21105 22542 21813 21401 22705 21997 21098 22669 21819 21507 22229 22251 21431 22185 22119 21585 21704 22387 21595 21647 22528 22710 21144 22636 22776 21340 22307 22380 22327 21763 22698 21833 22024 21945 22264 21973 21987 22201 22316 21711 22425 22278 21943 22075 22773 21833 22066 21996 22323 21751 22224 21870 22333 21692 22513 22172 21924 21849 22796 21830 22279 21947 22419 21616 22283 21985 22596 21431 22576 22121 22465 21680 22809 21672 22239 22038 22438 21546 22144 21881 22747 21601 22217 22173 22309 21489 22492 21926 22398 21404 22496 22151 22413 21492 22512 21782 22465 21411 22561 22186 22301 21511 22560 21964 22455 21477 22388 21961 22460 21764 22206 21911 22916 21601 22327 21984 22287 21580 22320 21965 22402 21453 22549 22212 22169 21741 22566 21839 22274 21553 22561 22196 22416 21625 22544 21909 22284 21556 22540 22135 22317 21511 21861 22238 22932 21681 21701 22053 22528 22257 21425 21911 23269 21809 21648 21408 22691 22914 21932 21137 21912 22453 23124 21615 21440 22320 22378 22090 21412 21853 23210 21767 21310 21426 22345 23016 21843 22037 21601 22386 22267 22321 21735 21865 22162 22533 22139 22587 21696 21932 21766 22427 22309 22247 50 5400 9536 12107 12339 13610 13221 14014 14264 14935 38104 29498 25651 24695 23511 23843 8393 14021 15146 16990 17076 17981 17763 18288 18151 40206 29490 26525 24320 24134 22801 10634 15414 17987 18025 19174 18811 19611 19686 20062 41499 29312 25136 24688 23195 23543 11220 17794 18771 20306 20205 20916 20430 20855 20231 21091 27467 24873 23055 23232 22784 14609 19381 21511 20519 21511 21307 21604 21154 21478 21314 26552 22962 23637 22131 22809 22091 22578 22189 22405 22470 22224 21952 22424 21843 22697 21755 22514 22187 22144 22144 22615 21661 22767 21888 22103 22391 22517 21293 22313 22249 21968 21318 22033 22516 21530 21800 23252 22461 21842 21129 21181 22989 22657 21553 21536 21680 22875 22416 22691 21607 21834 22323 22131 23002 22666 22384 22180 21455 21309 21220 21305 21927 21872 22084 21971 22185 22095 22203 22133 22172 22144 22132 22064 22193 22080 22566 21840 22052 21722 22030 21722 21988 21698 22055 21941 22624 22027 22552 21944 22151 21636 22080 21814 22603 22184 22322 22061 22119 21640 22320 21875 22665 21811 22344 21604 22280 21903 22508 22112 22386 21514 22219 21731 22776 
21856 22357 21496 22985 22029 21688 20709 21289 21623 21916 22676 22360 21837 21301 20963 21061 21504 22217 21692 22903 22242 21911 21517 21449 21371 21614 21653 21611 21963 21648 22167 21921 22009 21916 21712 21582 21513 21367 21700 21633 21259 21743 21680 21837 21817 21864 21746 21861 21809 21879 21794 22000 22007 21977 22041 21937 22042 21863 22113 21779 21952 21579 21862 21671 22001 21757 22037 21627 22028 21552 22029 21779 22108 21785 22104 21770 21879 21624 22382 21452 21719 21386 21728 21180 21594 21292 21746 21728 22245 21573 22170 21404 21815 21211 21613 21241 21845 21641 22110 21975 21882 21754 21860 21427 21496 21271 21560 21792 22656 21637 22602 21399 21395 20835 21351 22073 22185 22192 21463 20785 21072 21528 22600 22177 22889 21485 21518 21152 20981 21420 22345 22615 21688 21428 21160 20967 22247 21991 22464 21781 21000 21040 21944 22169 21804 21903 21693 21459 21512 22022 22050 21808 21865 21467 21405 21713 21843 22153 21643 21634 21324 21660 21922 21975 21995 21715 21312 21595 21728 22213 21673 21890 21395 21830 21932 21878 21687 21689 21281 21611 21760 22267 21573 21838 12282 16313 17305 17959 17828 18121 18207 19066 18674 39232 24761 23544 21559 22286 21721 22031 21568 22132 21553 22308 21728 22272 21431 21735 21403 21871 21979 22161 21344 21680 21341 22320 21521 21640 21680 22096 21452 22289 21300 22141 21463 22051 21624 21683 21648 21970 21427 21818 21832 22340 21602 21824 21199 21799 21511 22092 21577 21809 21317 21688 21253 21779 21575 21932 21516 21997 21912 22301 21865 22118 21399 21593 21404 22096 21685 21853 21476 21718 21228 21966 21596 22340 22016 21980 21280 21667 21953 21769 21359 21698 22587 21338 21079 22389 21235 21047 22310 22811 21969 20987 21272 22384 21552 21582 20909 21899 22560 22565 21279 20885 21703 22103 21525 21198 21577 22752 20891 21925 21597 21091 22658 20992 22121 21602 22016 21490 21866 21465 22173 21401 21796 21639 21575 21859 21575 21430 21709 22016 21605 21519 21936 21820 21803 21364 21741 22006 22006 21709 21738 21362 21568 21670 21795 21617 22092 21611 22256 21681 22172 21713 22178 21703 22197 21760 22278 21779 22328 21691 22288 21676 22279 21482 21990 21363 21664 21207 21685 21262 21806 21620 22184 21920 21942 21578 21928 21315 21663 21577 22151 21676 22219 10140 17802 18635 19788 19754 19830 19317 19961 20039 20808 26182 23689 22240 22189 21908 22247 21957 21952 21206 21849 21704 22087 21312 21700 21617 22080 21541 21652 21698 22276 21513 22039 21884 21895 21270 21991 21592 21760 21464 22059 21451 21591 21639 21876 21291 22087 21473 21805 21603 21673 21582 21941 21357 22116 21428 21705 21936 21812 21541 22285 21280 22112 21461 21936 21517 21632 22024 21428 21868 21927 21162 21978 20952 22864 20949 22364 21326 21991 21332 21336 22549 21128 22067 21160 21917 21769 20657 22902 21034 22226 21500 22204 21488 21847 22039 21491 21559 21175 22668 21112 22006 21137 22229 21519 22011 21661 21896 21489 21691 21824 21574 21637 21907 21622 22023 21716 21984 21551 21685 21602 21687 21994 21447 21715 21575 22103 21385 21664 21601 21966 21517 21824 21603 22004 21549 21667 21552 22020 21526 21615 21592 21998 21575 21785 21539 21875 21636 21653 21719 21887 21801 21584 21827 21609 22129 21458 22097 21298 22289 21220 21977 21398 22296 21362 21841 21533 22064 21594 21389 21722 21711 21920 21776 21504 21884 21529 22144 21499 21998 21336 22247 21433 21846 21719 21641 21863 21624 21441 21924 21553 22230 21376 18605 19554 20619 20722 20617 20517 21236 20339 21463 30001 23365 22316 21958 22040 22048 21414 22177 21388 22168 21864 21816 21473 21996 21265 22438 21281 21964 21696 21725 21687 21936 21634 22020 21384 22100 21824 21608 21460 22073 21265 22309 21585 21221 21722 21803 21511 22260 21363 21666 21682 21934 21351 22325 21504 21777 21664 21680 21609 22360 21229 21908 21678 21923 21049 22541 22038 21175 21632 22092 20766 22176 22520 21174 21440 22085 21636 21008 22249 22721 21104 21532 21811 22144 20765 22154 22563 21660 21228 21728 22201 21441 20902 22391 22649 21539 21239 21644 22223 21645 20855 22535 21959 21158 21531 21992 21959 21111 21678 22072 21957 21473 21669 21659 21838 21318 21931 21987 21751 21492 21681 21872 21811 21404 21975 22062 21477 22097 21824 21847 21477 21726 22213 21669 21625 21545 22069 21547 21597 21809 22177 21699 21707 21621 22035 21429 21655 21792 22321 21664 21563 21468 21953 21591 21640 21510 22163 21909 21606 21357 21944 21722 21863 21264 22225 21925 21825 21264 21888 21569 22060 21293 21836 21938 22175 21232 21775 21595 22135 21373 21987 21921 21838 21310 21723 21661 21997 21238 22119 21943 22026 21159 17172 20246 21389 20912 21180 21267 21875 21222 21280 21005 24048 22288 21808 21838 22247 21476 21819 21518 22202 21415 21760 21888 22275 21157 22103 21626 21902 21283 22336 21740 21670 21364 22027 21608 21690 21937 22265 21309 22170 21732 21909 21274 21897 21971 21975 21350 21856 21781 21831 21145 21980 21991 21804 21302 21831 21600 21556 21632 22345 21544 21549 21479 22038 21482 21381 22096 22663 20938 21617 21966 21559 21081 22914 21562 21467 21700 22001 20728 22493 22191 21469 21830 21993 20855 22823 21475 21606 22184 20903 22282 22070 21092 22026 21522 21530 22529 21026 21533 22016 21264 22860 20914 21549 22119 20870 22631 21587 21205 22208 21242 21696 22192 21296 21829 21611 21765 22140 21489 21611 21957 21315 22119 21776 21706 21779 21766 21718 22054 21328 21678 21696 21596 22080 21595 21586 21953 21397 22124 21817 21816 21605 21860 21680 22144 21337 21751 21753 21530 21979 21747 21676 22134 21408 22005 21873 21538 21465 22016 21403 22277 21285 21797 21831 21552 21984 21722 21497 22009 21299 22301 21705 21751 21697 21741 21728 22055 21500 22096 21232 22176 21741 21748 21489 22049 21398 22317 21252 21859 21760 21664 21865 21991 20576 21627 21066 22099 21346 21697 21549 21568 21632 24640 21723 22105 21642 21827 22016 21706 21463 22153 21175 22372 21571 21808 21625 21876 21550 22272 21207 21946 21717 21824 21882 21751 21421 22181 21120 22343 21600 21839 21600 21896 21565 22356 21156 21877 21677 21722 21920 21623 21477 22139 21291 22310 21363 21832 21808 21596 21952 21945 21408 22142 21269 22282 21475 21974 21760 21698 21747 22187 21189 21863 21770 21623 21876 22053 21337 22144 21209 22380 21485 21882 21767 21544 21960 21920 21504 22251 21294 22066 22227 21145 21456 22320 21284 22896 20970 21451 22221 20999 21876 22802 20889 21581 22080 20953 22501 22000 21063 21969 20972 22040 22413 21142 21377 22342 20737 22370 22199 21194 21523 21902 20923 22843 21437 21471 22105 21101 22257 22308 21210 21820 21822 21446 22223 21528 22256 21899 21655 21925 21788 21521 21903 21751 21632 22074 21632 21788 21908 21600 21743 22071 21475 21656 22016 21392 22142 21609 21900 21781 21734 21640 22224 21408 21664 21947 21500 22022 21735 21504 22096 21369 22251 21745 21799 21684 21646 21728 22163 21381 21783 21847 21572 21984 21947 21900 22124 21239 22247 21777 21702 21544 21923 21371 22391 21316 21800 21798 21734 21885 21783 21228 22149 21287 22147 21801 21712 21591 21848 21526 22249 21292 21981 21341 21986 21875 21665 21513 21908 21415 22385 21258 21872 21661 21683 21705 22258 21259 21933 21639 21618 21829 21952 21464 22080 21328 21994 21911 21760 21363 22102 21169 22376 21389 21939 21625 21835 21518 22292 21200 21883 21705 21778 21933 21738 21313 22062 21349 21958 22009 21532 21467 22136 21250 22248 21738 21831 21648 21676 21801 22053 21371 22016 21542 21824 21894 21755 21664 22150 21419 22087 21856 21483 21588 21766 22017 22352 20968 21912 21767 21357 22520 21558 21493 22367 21031 21691 22755 21155 21304 22375 20679 22811 21300 21602 22156 21313 21780 22728 20939 21551 22118 20917 22400 21473 21396 22402 20809 22721 21676 21376 22121 20883 22238 22178 21232 21991 21315 21928 22036 21421 21903 21634 21786 22064 21604 21658 21863 21602 22126 21520 21697 21863 21605 22060 21557 21656 21817 21461 22192 21448 21729 21921 21549 21956 21694 21691 21856 21670 22100 21696 22014 21408 22077 21578 21770 21792 21705 21683 21801 21509 22167 21432 21794 21448 22256 21412 22069 21496 21883 21544 21681 21954 21838 21740 22272 21446 22183 21531 21752 21641 21677 21508 22080 21396 21775 21754 22181 21788 21603 21657 22042 21903 22277 21280 21793 21730 22296 21477 21869 21354 21795 16428 18200 18509 19028 18999 19181 18801 19314 18855 29445 23686 22788 21818 22201 21625 22215 21743 22348 21729 22392 21612 22330 21527 22027 21417 21975 8647 18496 19148 19812 19558 20295 20162 20792 20545 20711 26672 23383 22216 22224 21632 21774 21349 21908 21699 22337 21613 22141 21544 21632 21283 22016 21953 16160 19723 20231 19981 20279 21077 22073 20637 20436 20169 24677 23355 22533 22324 21395 20783 21308 22052 22848 21352 21370 20864 21856 22720 21799 21324 21112 18977 21235 21224 21415 20559 21222 22170 21250 20614 32186 23372 23304 21593 20896 21591 21917 22088 21498 21651 21821 21876 21784 21608 21640 22023 21654 21811 20501 21344 21733 21504 21237 21365 21641 21927 21153 24261 22431 21961 21558 21703 21901 22161 21469 21539 21884 21921 21796 21637 21671 22272 21570 21543 21608 21991 21645 21677 21635 22298 21504 21579 21617 22003 21668 21833 21420 22311 21394 21730 21403 22104 21623 21671 21621 22329 21337 21641 21667 21999 21440 21620 21749 22232 21255 21812 21895 21930 21154 21927 21551 21782 21333 22128 21904 21780 21248 22051 21582 21888 21354 22106 21788 21982 21341 22181 21536 21996 21156 22260 21783 21911 21543 22320 20793 21696 22004 21760 21230 22063 21598 21710 21262 22089 21889 21696 21653 22287 21386 21784 21958 21774 21252 22295 21468 21586 21677 21976 21392 21510 21711 22016 20992 22148 22427 21552 21404 22889 21203 21344 22641 21461 21017 22880 21347 21074 21629 22131 21284 21400 22135 22124 20855 22353 22372 21325 21821 22748 21674 20976 22449 21634 20776 21639 22022 21560 20962 22264 22076 21436 21917 22016 21600 21670 22247 21569 21580 21666 21873 21798 21504 21824 22021 21488 21947 22010 21565 21673 22179 22005 21614 21837 21801 21417 21845 21665 21512 21472 21922 21584 21609 21802 21921 21296 22029 21968 21733 21664 22228 21371 21730 21911 21815 21351 22245 21453 21591 21853 21893 21249 22300 21476 21676 21637 21939 21304 22112 21476 21601 21638 21948 21319 21995 21529 21713 21516 22133 21398 21739 21592 21911 21308 22160 21724 21633 21641 22319 21323 21937 21960 21746 21254 22295 21469 21793 21248 22118 21536 21651 21620 22232 21213 22032 21986 21767 21536 22368 21479 21547 21592 21947 21465 21656 21716 22023 21242 22016 21856 21799 21458 22259 21504 21621 21517 22021 21494 21505 21808 22292 21333 22068 22407 21668 21136 22641 21356 20883 21760 22039 21285 21120 21917 22832 21429 20933 22328 21714 20866 21627 22277 22332 20909 21281 22501 21728 20744 21393 22180 22190 20940 21592 22541 21775 21059 21316 22008 21958 21817 21515 21850 21834 21960 21449 21786 22042 21685 21370 21923 21760 21559 21424 22034 21779 21610 21753 22165 21569 21533 21870 21888 21677 21415 21735 22275 21570 21536 21704 22016 21570 21634 21667 22285 21506 21597 21386 22052 21961 21883 21241 21895 21669 22142 21408 21857 21811 21895 21346 21680 21815 22253 21485 21629 21325 22016 21879 21884 21223 21978 21642 22059 21364 21790 21968 21880 21313 21664 21625 22336 21565 21955 21303 21920 21888 21941 21447 21744 21321 22211 21632 22384 21373 21789 21196 21975 21890 21911 12742 17648 18191 19335 19077 19774 19020 19328 19158 20007 25984 22821 22096 22081 21947 9114 18152 19796 19585 20279 20199 20625 20295 20841 20931 27163 23557 22785 21853 21636 21156 17937 19404 19904 20339 20824 20565 21443 20681 21991 28505 24371 22727 22581 21957 21595 17808 19988 20279 20986 22165 21692 20746 20507 21223 22412 23500 21771 22035 22016 21933 18707 21250 21443 21215 21487 21415 21688 21732 21385 21992 22601 21938 21929 21690 21808 21570 22003 21877 21509 21997 21441 21928 21401 22071 21701 21648 21991 21813 21484 22304 21392 21706 21962 21577 21443 22304 21416 21675 21812 22075 21239 21811 21600 21818 21166 21816 21877 21961 21159 21856 21449 22191 21554 21573 21399 21764 21889 22080 21517 21704 21403 22231 21547 22229 21632 21912 21366 21624 21256 21953 21323 21526 21644 21848 21767 21948 21881 22018 21799 21896 21774 21955 21784 21756 21796 21801 21666 21660 21459 21735 21447 21879 21207 21654 21420 22000 21749 22228 21485 21943 21541 21559 21358 22016 21927 21884 21840 21845 21243 21379 21476 22123 21700 22144 21415 21056 21408 22329 22565 21796 21166 21120 21313 22546 
36625 42224 43207 39008 38887 35040 34555 40640 34688 37480 35139 42061 36992 40875 37579 38452 32664 40649 35320 37858 41049 37720 33120 42246 42064 34577 34513 34161 38074 34397 40192 37657 38727 37611 35176 33831 32743 41526 35288 34193 40440 36114 34743 36688 36476 36937 35680 36955 36285 37293 36078 38345 38818 38389 38912 37812 38891 37190 39650 36085 37744 33895 36854 34907 38387 36103 38759 34586 38562 33328 38621 36034 39616 36169 39461 36698 39514 37793 39297 38214 40193 38503 37928 37241 37735 36585 37064 35026 37015 35156 36457 32576 36530 32845 36146 40920 35897 40408 34864 40823 36292 33377 36981 33575 40653 34854 41121 42477 41392 42828 41568 41840 42066 36201 41500 39432 40588 40544 42919 35557 38265 33072 34063 40120 37815 43033 33400 39050 37712 42149 42320 34934 34888 42041 39598 37652 41287 38742 43211 36201 37530 37974 37831 40308 36448 37557 35236 42444 33052 38405 38900 36240 37031 42769 42343 35499 36688 40064 34699 34131 40995 34878 37403 38363 38663 35456 40721 34257 35225 40680 35042 37016 41794 36789 37741 37240 35153 35003 40448 34461 35412 41453 33921 36665 37588 39847 39116 36283 34604 37789 38883 37819 33445 38495 36805 44518 34100 41360 35633 38863 33514 39721 33511 41393 35563 40915 42536 35991 41992 37539 38438 40113 41313 34972 41369 41816 33153 34145 34651 39168 42580 41604 40992 40356 42872 39197 34424 34861 34231 37964 42253 36682 36512 41897 34220 36215 40073 36448 32912 39246 33868 36136 41032 35165 40219 36096 33755 37571 32969 38432 37450 41697 37261 39776 42120 34224 41784 39504 35159 36916 42649 35680 40227 38349 34068 41752 38536 38408 40509 34908 37797 35891 41708 35234 34248 41184 38873 42707 40633 38502 41735 36993 38117 37866 40457 42520 33552 33728 36723 37357 33661 33765 40681 36611 35276 39616 33160 39813 33863 35845 36589 37604 34183 38636 34928 37265 39816 34100 38181 42870 37290 42660 40679 42088 36336 34449 33697 36808 33784 42070 35653 38248 34176 33040 37436 36535 36335 41496 36035 38601 38705 35475 35594 41408 33656 34637 36072 34149 39324 34410 40981 35064 40220 35410 40185 35463 40535 35685 41200 36151 41770 35427 41130 35104 41302 43052 38708 41723 34777 40016 35172 40409 36539 34193 40215 37555 37891 33813 37431 41035 35100 33650 39949 35053 40864 35035 34292 32930 35191 34889 35802 40288 37515 38185 35621 41969 36299 40860 40776 37491 41312 38237 37803 40032 36962 35154 39392 40960 35267 34112 38960 33409 34305 34918 41058 33081 38718 37380 37378 40534 38683 33965 35396 42437 39404 42689 34300 34376 36977 40849 39654 42779 36653 34089 34722 33777 37721 41688 39840 42281 35495 37552 36336 33256 41298 40626 39670 42742 37842 33120 33920 38386 42199 37319 37799 39506 38407 37248 37172 37258 42339 41536 38710 41245 41378 33954 38839 39248 39493 37761 35904 33833 37685 38115 40864 43292 40968 42909 37146 38938 43008 33952 39595 35246 38848 38732 39184 41056 33397 38635 34917 37072 42812 35445 36280 33638 34215 37286 34362 38571 35341 38098 33673 34861 33866 34984 38378 42551 35634 33740 39528 41826 34788 33869 38093 33117 36162 34040 38388 33572 34616 33120 38300 33123 34272 33712 38486 33856 35930 33189 37002 34250 34480 35397 37456 36264 33615 36385 34160 39680 42606 39669 40867 41521 40288 38448 41909 41673 41706 36868 33280 38776 34032 41785 35691 35469 37339 35741 32528 37079 33154 39554 43248 38922 41282 41507 42519 37040 35531 34362 37008 34267 42096 37755 33429 40788 41562 32960 32453 33360 34529 33319 32128 40043 41416 42958 42096 42965 42056 38240 38808 38784 42112 40512 41915 40395 37088 36354 42598 38762 40448 43200 40833 38291 35013 35525 35080 37496 34212 38344 41640 39668 36448 34043 42312 39476 40486 41840 33988 40154 35622 36299 32940 41053 41792 34929 34788 37738 41608 42096 32836 35708 34498 34642 34082 42013 40614 37504 35048 37513 38309 33776 38621 39821 34280 39298 35320 40092 44038 39939 42243 39616 34391 37435 41261 35861 38660 33248 36232 39689 35349 40009 34029 34532 40087 35517 40603 42402 36915 42756 35313 33140 40314 34642 40978 34754 36241 33568 37957 39474 33329 38216 38176 39148 35131 39063 38112 42664 35075 34689 36672 41029 38009 38441 36006 42801 35156 36873 36365 41910 38572 39264 42888 39601 36464 36873 42752 35900 40722 34969 34333 33216 39027 33546 33956 36144 40224 35304 35280 34268 38624 42312 34978 35872 41665 34752 33574 42474 38128 34080 34182 32704 39978 37580 34152 41544 38016 35521 37029 40224 40996 37832 36460 40196 37139 33571 38914 40976 36873 37733 40552 40279 36256 34076 39936 41975 38640 37600 36792 41077 35776 34784 38516 40452 40064 38129 38663 39624 37541 40220 42025 36819 39730 40613 37334 40180 40576 37987 40052 41344 36345 36784 41249 42874 36871 33076 40474 42324 35777 36956 41216 39623 39771 34547 37331 40675 41946 35939 34755 41420 38952 34164 34948 37633 41440 41306 40412 35686 37395 40568 37466 38224 38378 41509 36934 36013 36643 39280 38439 38612 36352 40881 36880 33862 33235 33955 41920 33465 33340 42677 39042 42928 41961 39555 35236 36993 34199 38116 33659 38516 37784 33592 42563 35364 38391 34869 43664 41009 42986 36873 38456 36409 36920 42700 34381 40243 36907 41344 39361 38784 38727 32990 32946 33096 37673 33348 38120 40311 37456 36728 33504 39692 36363 34867 33737 39872 40646 40593 35133 40263 40781 36775 34279 35681 39991 42961 34592 37930 41048 40064 35865 35200 35886 35733 35363 38912 41073 35208 34849 33914 38953 34167 33621 37732 41872 40087 36608 36322 34104 36744 34768 39641 41440 36167 35850 33074 38220 35840 34855 39860 41913 38870 37141 33154 42432 38549 42097 41516 40915 36391 36676 33236 38011 35490 42932 38952 40960 41895 35464 35888 35018 35727 35319 39016 43156 39584 40239 40329 35973 35673 42752 39079 41969 42136 40403 37111 35546 34468 36965 38512 32961 34314 38310 39600 41389 35265 33428 33226 33965 34912 35488 39567 34546 36449 38307 35288 42606 40321 39896 42474 33900 36022 34380 36953 33523 40823 40284 38065 35468 36259 37229 35940 42199 40647 38953 42246 34107 36763 33868 37040 33744 41946 39552 37323 35049 35376 37330 34464 42636 40379 41043 41869 41845 36747 36155 33978 37648 37921 41839 40387 40676 41511 42955 38480 35620 34969 35728 40504 39957 37250 35856 34402 36992 38968 41416 39963 40201 42680 43269 37524 35940 33173 37817 37408 32583 41112 41078 39248 41032 39482 42471 41856 40856 37740 37511 42576 41237 37901 37172 36464 36490 33894 38948 37376 43791 38648 38598 38177 37568 38789 42912 39507 41644 42244 34890 42184 40941 40032 33217 37251 37069 37221 42426 43194 39920 39125 41345 41744 40297 36679 36608 42356 41348 33238 40839 37580 34739 37568 36112 32887 37388 35952 34093 39116 34210 35928 37318 33858 35814 39248 42839 34824 38227 41632 40394 34341 37174 36020 35566 34267 40578 41947 34791 37930 43094 38868 35821 32521 39094 41799 41573 35884 36272 34886 34471 35255 40082 41796 36344 36877 33574 38024 38057 37312 39872 40626 41464 36036 35169 33156 37430 41833 42992 41204 36352 36199 35584 37368 36106 40282 40179 40947 40181 36400 35127 33955 36580 33062 41019 40992 38632 41532 38500 37238 34673 32801 37132 42168 42736 40596 37111 34833 34870 35176 41116 40649 38034 34560 34057 36473 37720 42560 39363 41108 38668 37651 35545 41542 39755 39630 42500 42124 38036 34471 36621 33056 41156 39928 37505 35264 35776 37814 35694 40872 39368 41560 38240 38757 33264 42532 40144 40304 41266 35864 36651 34336 34768 36176 38934 41920 38549 33368 36171 37210 35989 34437 39880 42349 39728 36867 42939 34107 35638 38392 42006 37611 37447 35918 41600 44144 33848 42766 42830 38375 35296 36136 39348 40950 42727 34616 36698 40744 34138 40001 41025 36102 35718 37129 33633 39591 36961 42386 42880 42048 42720 35911 35648 34820 41316 40023 36548 41176 40417 40283 38704 41090 37794 38712 42336 37816 34263 35943 38871 34093 34522 36986 33973 39824 32941 34872 36996 34141 38953 33600 34387 36354 42547 40616 42504 35741 37453 33539 37761 35265 35122 36647 34808 39332 35029 38757 41856 39634 33865 35698 35879 35211 34886 36168 32792 40135 42322 36304 42278 41357 42171 39434 43051 37613 33289 34694 37779 36784 35704 40962 42561 40796 33456 35590 34391 34896 32593 38913 41837 36295 35880 40376 36192 34039 34504 38737 37666 41219 40632 36202 35436 41344 43008 37488 41506 36311 29472 38123 31673 36945 37050 39093 34881 40080 35604 45781 36405 36279 36433 40624 34570 40752 36112 42071 35716 42496 34496 41804 33450 38603 42176 38585 29104 30766 38304 35629 32755 40608 39465 35474 32483 34544 36416 42947 40994 40896 34331 35892 41383 37520 35186 41789 34583 40069 33381 33941 40491 38464 37952 38027 34725 39987 37619 40696 38754 39332 33963 41984 39744 35922 42615 33786 41632 42037 35764 40904 39042 37044 41401 41942 36217 36679 35568 36262 41136 39128 36634 40311 40306 42359 33319 39972 40391 40312 33585 44894 43120 42161 34234 36288 33984 37532 39331 43170 34856 36522 37087 35963 34053 34156 38555 34674 36292 32055 40919 35798 32565 40178 41793 34676 37680 39360 42473 43415 38377 33600 35143 37368 40088 42976 33546 37145 37544 36129 34337 34789 40901 33728 33247 33878 38405 34672 34908 34228 41388 32807 33648 34012 38478 34786 36508 42090 42036 41957 35697 41927 39744 34614 34800 34234 41798 41529 34655 34646 38659 42205 34473 35720 40873 40604 36451 37345 37728 39315 37847 33688 35863 41168 39889 37346 35905 39978 39074 34028 36864 41479 39817 36246 38373 41524 40620 33222 38361 39384 41373 36331 37546 33422 41431 35812 34875 38426 35595 40325 39442 34257 35287 40411 39559 37232 34960 34496 41463 41949 36161 37998 36041 40136 41728 42942 34049 34876 38090 41645 33068 35351 38255 37400 39904 43156 33563 41748 37890 40025 41304 35048 42481 38104 37412 41434 38631 34624 39829 40737 41952 40314 40032 36466 42038 42583 41533 36816 36152 34744 37268 43064 34528 35063 34373 38473 33557 37123 41308 39498 42458 37913 38373 33964 34641 41160 33747 33641 34477 36946 36209 32538 36129 38554 42793 38278 38755 33861 34701 40263 38705 34416 36672 36257 42064 37003 34679 32676 42240 37744 33696 34016 36123 37479 40640 38951 38070 35680 34480 40745 42024 35685 37517 36565 41516 41376 42827 34313 36880 37254 40144 41731 42917 35185 34280 37734 40864 39667 42816 34248 34247 37856 41206 38756 33248 35095 32815 39785 41992 35998 33833 37440 40979 40141 35687 34168 34304 41874 41437 37911 38040 35727 40230 41733 43054 36341 40000 39904 33188 34372 34113 40781 40384 38674 38359 35971 32967 41949 43136 33772 33692 37888 42691 34796 35217 38627 40526 38472 36817 36288 42384 41568 32827 34138 32900 38401 43044 32992 35989 41307 41466 39272 42867 34957 38885 34904 41440 36626 35504 38848 40827 38944 37736 36821 42199 37251 41810 35497 36049 34445 41152 42180 37120 40536 43936 35686 34699 41547 40516 40800 37316 33856 33523 35971 38324 40984 38766 38113 36517 32976 36648 36616 37968 42488 36295 38816 35123 41589 37818 35584 33575 41776 38854 36064 34136 35748 40163 33696 33117 37013 37000 35033 42051 35960 41188 33751 32864 34931 38230 33609 34069 34616 41363 32917 33946 41527 39075 38192 37418 40460 37494 34849 40087 41897 37050 36390 37348 41315 34952 36448 41352 43217 34866 41136 38499 37405 37304 40309 38414 34529 39059 41600 36402 37952 37202 40921 34724 34288 41624 33978 37871 41058 37568 37026 37875 42552 35820 41046 40901 34317 42223 42112 36439 39864 38464 37160 37581 31933 32410 38429 40518 37907 35370 37128 40078 38820 37985 39568 37063 39309 39306 38135 33828 38058 35430 32861 40451 40113 33606 40656 36209 36944 42261 34711 36141 36936 34242 39070 35926 41137 36656 41268 35968 32897 42138 34529 38442 46646 43904 36272 34091 37866 34104 34137 37264 40714 37856 40264 35257 34765 32155 40017 42892 44370 36279 38738 38400 37917 33723 40000 42480 40582 43288 42496 35244 35425 41615 38595 34464 37606 37719 35128 36072 33527 38437 37256 32875 38429 42320 37844 41949 39552 35319 34287 38421 36471 42833 41683 41832 35493 38007 33802 42179 41640 42210 35258 36246 39318 40601 36571 33856 36304 39618 36492 37186 38067 39607 36877 42447 40964 33548 33523 41792 35901 37058 39088 33152 34984 41907 41332 33697 40808 34304 37259 41637 34529 40134 37991 41289 33357 34325 36625 35898 37908 37312 38448 36392 37168 36008 37952 36003 35895 36060 36224 34633 34586 42406 35973 42459 37548 40144 34744 42008 38582 35911 40813 43188 38261 33370 33446 41448 38509 37851 37346 36568 36768 40560 41783 42912 40192 35260 39699 42276 38354 41838 42152 34194 35985 39617 38897 40983 33733 
23095 23510 23184 22288 21948 22362 23149 22840 23699 22936 22391 21760 22216 22386 22464 23449 23264 23420 22977 22176 21873 22020 22255 22749 22791 22864 22895 22908 22912 22956 22531 22536 22249 22424 22323 22791 22476 22936 22584 23168 22647 23138 22692 23200 22613 23132 22712 23093 22688 22965 22723 22953 22506 22820 22345 22632 22224 22495 22217 22677 22164 22673 22147 22733 22267 22592 22102 22695 22047 22554 22023 22581 22204 22601 22105 22531 22208 22660 22257 22711 22296 22979 22485 23015 22583 23190 22603 23296 22633 23323 22493 23281 22496 23259 22437 23210 22338 22938 21673 22767 22264 22776 22380 22616 22141 22873 22423 22950 22597 23123 22728 23109 22794 23001 22781 22771 22502 22857 22178 22677 22214 22601 22534 23068 22574 23183 22493 23105 22458 22784 22453 22528 22179 22473 22367 22840 22736 23015 22821 22775 22909 22661 22442 22339 21910 22115 21733 22045 22139 22543 23163 22851 23168 22718 22887 22423 22647 22809 23041 23028 23012 22423 22735 22709 23143 22697 23013 22507 22624 22531 23160 23031 22923 22369 22772 22787 23267 22623 23205 22637 22743 22628 23175 49 13039 13697 14706 14976 15786 15009 15477 15144 16169 28911 26506 25144 24809 24323 24363 23895 24064 23610 23875 23243 23419 22752 23414 23009 23815 23145 23426 22595 23457 23122 23538 22566 23125 22769 23513 22595 23386 22679 23607 22576 23336 22601 23027 23108 23177 22618 23424 22708 23218 22504 23140 22940 23613 23120 23467 22686 22808 22616 23226 22941 23190 22636 23073 22786 22982 22652 23461 22499 22701 22598 23205 22968 23373 22887 22770 22480 22997 22835 23130 22648 22896 22483 22604 22595 23424 23230 22464 22352 23339 22568 22256 23349 23622 22037 22855 23107 22560 22332 22607 23479 23708 22284 22166 23036 23242 22520 22681 22087 23179 23770 23239 21879 23089 23176 22603 22103 23759 22770 22419 22810 22176 23654 22235 23031 22604 23154 22404 23077 22261 23144 22737 22711 23024 22782 22644 23281 22685 22545 22744 22936 22873 22784 22326 23074 22727 23031 22392 22686 22323 22955 22691 22935 23009 23059 22791 22984 22528 22823 22443 22823 22389 22771 22377 22723 22381 22814 22517 22849 22394 22960 22695 23108 22807 22898 22765 22799 22645 22988 22237 22745 22353 23093 22595 23316 22400 22994 22486 22615 22242 23059 22890 15031 15838 16695 16468 17644 17195 17870 17271 17840 17639 26354 24780 24295 23481 23593 23310 23975 23040 23532 22656 23342 23431 23342 22841 23063 22961 23657 22466 23028 23099 23147 22435 23336 22640 23178 22391 23312 22897 22965 22882 23409 22501 23256 23005 22720 22821 23278 22438 23191 22814 22698 22844 22983 22624 22969 22416 23172 22568 22736 23057 22772 22709 23176 22387 23112 22391 23249 22257 22884 23399 22177 22966 22440 23256 22807 22939 23424 22103 22912 21847 23783 22243 23196 22721 22308 23127 22065 23232 22592 22503 23484 22362 22698 22150 23708 21925 23094 21858 23732 22131 23344 22802 22734 22429 22637 23277 22425 22587 22178 23431 22501 22832 22621 22977 22503 22711 22595 23120 22273 22906 22325 23190 22243 22966 22281 23244 22405 22903 22400 23193 22522 22981 22406 23111 22570 22993 22298 23299 22278 23034 22188 23270 22386 23040 22320 23273 22357 22921 22290 23244 22320 22832 22274 23124 22448 22833 22666 22672 22880 22964 22640 22609 22775 22637 22479 22669 22752 22790 22369 22971 22421 23184 22293 23012 22221 23149 22448 22880 22656 22652 22756 22612 22391 22900 22264 23191 22148 22907 22276 23143 22528 9836 17671 18411 18484 19250 18435 19314 18927 19217 19479 26056 24460 24164 22915 23817 22748 23215 23059 22948 22966 23350 22436 23356 22560 23079 22913 22801 22592 23278 22357 23332 22434 22963 22797 22667 22848 23104 22355 22944 22625 22785 22944 22803 22519 23142 22358 22898 22997 22653 22621 23058 22423 22877 22916 22859 22437 23118 22307 22961 22984 22507 22921 22993 22484 22528 23249 22914 22164 22985 22658 22087 23116 23421 21893 22915 23005 22658 21871 23587 23282 22171 22775 23057 22737 22037 23224 23710 22287 22531 22567 23222 21952 22080 23296 23667 22109 22225 22544 23277 22237 22004 23559 22738 21904 22384 22973 22859 22331 22501 23168 22688 22474 22006 22860 22455 22496 22644 23221 22417 22679 22597 22872 22464 22496 22807 23061 22342 22713 22660 22748 22225 22987 22834 22679 22488 22733 22696 22642 22295 22972 22896 22770 22225 22773 22661 22666 22278 22981 22759 22821 22170 22777 22551 22810 22180 22895 22726 23123 22163 22706 22493 22977 22295 22615 22669 23204 22289 22757 22357 22993 22487 22698 22373 23264 22620 22553 22120 22935 22554 22613 22656 23165 22310 22597 22249 23020 22356 22576 22517 23249 22370 22642 18198 20197 20052 20304 19889 20945 20567 20790 20097 31932 23664 23509 22629 23394 22990 22739 22331 23040 22689 22887 22331 23299 22580 22725 22326 23084 22278 22880 22817 23122 22263 22784 22635 22856 22245 23222 22752 22577 22397 23012 22514 22568 22689 23161 22535 22578 22432 23064 22470 22598 22596 23175 22240 22616 22593 22833 22200 22962 22786 22661 22269 22765 22701 22572 22066 23296 23191 22109 22392 23208 22087 22433 23533 22348 22420 22967 22420 22000 23483 22744 22374 23011 22445 22184 23559 22299 21998 23281 21698 23652 22409 22344 22983 22153 22767 23466 22073 22807 22147 22678 23354 21978 22501 22901 21959 23713 22088 22642 23046 21773 23109 22824 22335 22575 22533 22485 23112 22148 22726 22520 22471 22836 22582 22418 22789 22341 22905 22784 22398 22518 22528 22544 22960 22192 22661 22602 22453 22763 22725 22472 22945 22344 22993 22515 22609 22448 22753 22291 23095 22136 22584 22610 22464 22767 22912 22241 22912 22333 22844 22720 22695 22447 22909 22153 23193 22107 22728 22516 22608 22743 22669 22326 23027 22019 23015 22134 22759 22545 22560 22606 22913 22068 22918 22288 22756 22695 22488 22353 22928 22157 23118 18517 21355 21186 21576 21590 21480 21205 21952 21028 22096 23126 23054 22565 22850 22368 23253 22037 22841 22449 22675 22726 22789 22439 22966 22198 23071 22645 22589 22368 22858 22460 23137 22039 22849 22508 22682 22624 22702 22063 22996 22112 22976 22584 22634 22280 22841 22237 23091 22134 22685 22530 22695 22744 22511 22336 22883 22213 23108 22229 22725 22471 22601 22763 22509 22354 22966 22150 22978 22629 22532 22395 22844 22205 23072 22253 23054 22545 22485 22793 22367 22358 22885 22029 23373 22074 22700 22754 22135 23048 23045 21910 22625 22161 22743 23331 22028 22297 23153 21611 23226 23264 22114 22344 22794 21787 23587 22361 22272 22894 21865 23142 23114 21895 22602 22891 21720 23351 22692 22069 22816 22171 22381 23507 22098 22734 23090 21702 23511 22493 22215 22727 22336 22535 22860 22392 22343 22890 22187 23043 22336 22674 22471 22495 22438 23036 22267 22518 22636 22416 22627 23053 22195 22614 22683 22373 22840 22513 22295 22927 22210 22891 22651 22554 22291 22850 22136 23077 22024 22647 22434 22592 22714 22570 22105 23001 22064 22971 22571 22645 22417 22770 22199 23156 22239 22714 22544 22512 22580 22864 22207 22856 22349 22732 22656 22480 22261 22800 22234 23186 22025 22637 22480 22464 22680 22780 22468 22874 22225 22816 22490 22501 22455 22503 22569 22869 22151 22887 22096 22904 22649 22560 22197 22921 22056 23079 22518 22516 22396 22822 22263 23143 22164 22374 22581 22494 22345 23112 21975 22920 22278 22661 22739 22656 22169 23040 22080 22951 22563 22401 22268 22754 22330 23084 22126 22610 22568 22549 22539 23015 22209 22672 22406 22443 22757 22740 22183 22909 22088 23065 22343 22731 22528 22645 22366 23087 22082 22568 22673 22471 22677 22699 22401 22844 21997 23293 22551 22233 22544 22491 22354 23598 21873 22438 23010 21790 22673 23440 21808 22412 22950 22016 23397 22000 22212 23129 21627 23088 23022 21985 22327 22906 21713 23660 21712 22373 22861 21764 23493 22103 22257 23177 21709 23511 22378 22417 23023 21870 22976 22696 22596 22575 22422 22563 22921 22395 22747 22346 22641 22705 22423 22535 22595 22442 22941 22176 22597 22466 22556 22721 22360 22336 22744 22277 23114 22155 22813 22252 22895 22372 22624 22600 22580 22672 22440 22329 22682 22464 22454 22402 22425 22731 22464 22441 22470 22713 23087 22416 22970 22080 22895 22107 23004 22194 22429 22639 22833 22350 23086 22041 22997 22416 22503 22446 23041 22150 22828 22631 22740 22184 22464 22288 23040 22261 22883 22103 22612 22384 22999 22609 22698 7299 13028 13646 14550 14577 15491 15161 15855 15130 15865 27434 25989 24503 24442 23893 23849 23019 23661 22965 23625 23059 23687 23239 23684 23257 23431 23288 15023 16438 17063 17197 17326 17175 17584 17428 18044 17937 26682 25017 24916 24000 24301 23475 23584 23248 23268 23140 23659 23536 23421 23159 23104 22731 23076 17685 19334 18745 19611 18889 19014 19841 19972 20059 29894 24005 23794 24095 24631 23225 23621 22742 22733 23425 23825 23757 22798 22197 22926 23585 23940 22775 19089 19665 21091 21517 20644 19840 20807 21237 21330 25115 23317 24088 23512 23535 22738 23192 23313 23124 22709 22947 23015 23388 22740 22665 22648 23200 19315 21441 21326 21981 21823 22063 21487 21916 22149 21855 23288 23284 22935 23312 22632 23109 23025 23016 22464 22853 22779 23392 22491 22803 22780 23151 22599 22688 22746 23405 22308 22716 22850 23062 22583 22732 22761 23413 22428 22781 22492 23204 22570 22871 22534 23346 22282 22807 22813 22909 22441 22644 22711 23248 22505 22884 22845 22938 22181 23104 22472 22972 22211 23168 22774 22869 22262 23093 22534 22920 22233 23040 22882 22814 22292 23252 22445 22742 22292 23206 22820 23040 22312 23212 22352 22568 22729 22935 22236 22985 22545 22906 22206 23080 22729 22708 22401 23234 22385 22555 22872 22831 22151 22921 22538 22583 22375 22925 22438 22583 22675 23158 22208 22860 23158 22538 22128 23402 22386 22038 23092 22651 21695 23223 22466 21906 22752 22818 22363 22080 23047 23317 21946 22733 23632 22304 22255 23681 22785 21970 23453 22754 22016 22496 23106 22915 21875 23128 23400 22435 22597 22980 22921 22297 23152 22441 22505 22659 22919 22609 22511 22736 23011 22295 22640 22984 22723 22334 23095 22439 22568 22709 22775 22214 22616 22595 22890 22241 22927 22682 22433 22570 23103 22264 22876 22697 22629 22227 23132 22336 22600 22765 22772 22064 22917 22423 22585 22513 22814 22232 22791 22429 22637 22112 23088 22400 22636 22489 22840 22295 23016 22345 22558 22592 22992 21997 23053 22603 22587 22594 23044 22064 23045 22693 22841 22326 23248 22652 22758 22754 22817 22149 22844 22416 22718 22331 23095 22596 22568 22535 23239 22092 22890 22720 22461 22195 23162 22291 22504 22400 22859 22480 22505 22587 23049 22138 22854 22747 22817 22221 23182 22266 22515 22528 22698 22319 22446 22599 23212 22389 22759 22992 23164 22073 23195 22462 22114 22407 23060 22475 22045 23032 23700 22295 21965 23157 22609 22032 22286 23035 22802 21891 22671 23505 22598 21824 22465 22976 22840 22049 22703 23527 22855 21721 22546 23077 23130 22292 22516 23060 22412 22536 22127 22863 22842 22501 22220 22845 22487 22630 22287 22837 22692 22564 22513 23080 21888 22435 22650 22767 22353 22432 22592 22939 22400 22495 22565 22832 22336 22553 22575 23160 22065 22542 22806 22837 22643 22808 22219 23035 22412 22718 22016 22917 22653 22807 22036 22747 22471 23100 22129 22493 22360 22888 22542 22582 22146 23057 22327 22721 22036 22912 22656 22751 22127 22784 22441 23063 22212 22527 22377 22977 22775 22680 22024 22864 22504 23148 22179 22560 22001 22730 22549 23003 22547 22613 22087 22720 22696 12806 13247 14116 14192 15160 15339 15525 15317 15498 32344 27036 25127 24975 23887 23913 15008 17049 17398 17651 17389 17701 17626 17806 17536 17745 25862 24590 23809 23881 23521 14011 18723 19022 20114 19861 20627 20308 20532 20373 20224 26345 24261 23658 23298 23113 23418 20407 20505 21833 21558 20568 20091 21110 21862 21667 26121 23380 23825 23779 23405 22964 21945 21712 22149 22278 21948 21923 22220 21756 22199 21533 23881 23285 23121 23306 22976 22932 23157 22999 23188 22704 23493 22630 23145 22902 22929 22778 23035 22669 23374 22500 23319 22888 22939 22896 23260 22439 23126 22638 23278 22358 22987 22990 23043 22408 23478 22707 22914 22359 23001 23032 23181 22281 22960 22516 23383 22784 22967 22244 23156 22729 23281 22700 23037 22235 22716 22522 23000 22503 23270 22492 23265 22676 23271 22768 23324 22769 23184 22641 23179 22615 23207 22714 23261 22717 23247 22746 23285 22540 23301 22687 23252 22426 23008 22649 22649 22298 22824 22530 23079 22982 22838 22550 22759 22304 22904 22605 23187 22601 23092 22609 22484 22220 23094 23346 22885 22458 22144 22081 22686 23184 23700 22623 21980 22087 
21959 23188 22105 22249 21824 22600 22425 22849 22310 22657 21619 22464 22011 23053 22008 23314 22289 22945 21748 22317 21730 22613 22164 22753 22629 23033 22488 23005 22131 22567 21610 22320 21707 22721 21160 22919 21908 23272 22187 23032 22385 22991 22277 22651 22278 22692 22170 22551 21974 22416 21907 22331 21724 22233 21876 22125 21728 22223 21767 22620 22122 22369 21973 22535 22010 22120 22053 22023 21800 22087 21475 21915 21450 21860 21182 21791 21064 21656 21142 21504 21159 21666 21173 21696 21763 22179 21840 22395 22321 22836 22505 23210 22767 23454 22861 23793 22568 23552 22267 22641 22384 22363 22203 22061 22113 21833 22244 22080 22332 22246 22560 22327 22711 22487 22823 22293 22649 22204 22595 21917 22254 21620 22240 22259 22697 22565 22705 22663 22702 22502 22445 22086 22364 21703 22024 21840 22546 22128 22905 22273 23068 22037 22871 21457 22433 21731 22247 21738 22431 21659 22423 22018 22920 22231 22997 22453 22556 22375 22552 21825 22429 21584 22231 21685 22599 21888 22914 22152 23212 22064 23120 21892 22725 21775 22546 21824 22204 21609 22236 21686 22688 22302 22797 22551 22690 22081 5473 7747 10439 10078 10840 10611 12020 39968 35861 32945 30801 29336 28109 27116 26547 25111 24534 23580 23463 23685 25013 24100 24611 23040 22653 22742 23158 24269 23104 22167 23658 23364 22313 23201 23547 22122 23257 23150 22598 22936 22368 22984 22871 22673 22331 23045 22549 22613 22439 22288 22237 22752 22945 23171 22595 22427 22138 22374 22341 22816 22488 22696 22331 22935 22411 22569 22241 22608 21846 22374 22345 23176 22551 22714 21819 22420 22099 22987 22210 22726 21968 22450 21884 23130 22488 22403 21849 22849 21929 22438 22375 22952 21559 22841 22138 22581 21714 22442 22518 23111 21992 22374 22026 22778 21958 22459 21648 22813 22553 22867 21655 22676 22184 22758 21975 23215 21737 23008 22392 22696 22240 22675 22055 22488 22348 22747 21760 23137 21628 22709 22222 22395 21945 22969 21586 22833 22341 22813 21821 22308 21844 23132 22237 22151 21672 22557 22061 22543 22443 22708 22387 22792 22009 22380 21636 22275 21648 22099 21702 22164 21527 22264 21648 22144 21479 22096 21569 21960 21805 22601 22617 23019 23321 22796 23413 22277 22247 21825 20948 21767 22185 23171 22533 23595 22180 21623 21223 21785 22752 2737 7696 9206 10293 12656 14087 15727 14202 14460 39616 35033 32113 29546 27878 25953 24750 25744 25075 24986 24071 23445 24162 23528 23812 22768 23568 23475 22887 22608 23416 22832 22727 22652 23143 22967 22579 22940 23237 22465 22761 22869 22569 22396 23264 22209 22824 22670 22532 22421 23017 22004 22835 22560 22364 22337 22492 22275 22689 21830 23162 22497 22669 22457 22391 22501 22424 22379 22645 22026 23160 21738 22991 21886 22984 21985 22846 22353 22368 22150 22420 22400 22744 22203 22872 21615 22840 21796 22935 22018 22551 22455 22327 22038 22330 22392 22481 22162 22464 22343 22631 22249 22905 21970 22676 21886 23127 21645 22691 21722 23160 21716 22547 21923 22770 21681 22599 21753 23079 21560 22829 21505 23131 21547 22905 21588 23089 21736 22848 21600 23087 21989 22860 21950 22855 21733 22941 21753 23040 21861 22683 21644 23126 21703 22878 21952 22953 21850 22771 21706 23009 21561 22704 21755 22935 21928 22432 22147 22439 22473 22364 22336 21911 23099 21838 22369 21572 23361 21609 21788 22099 22599 22787 21448 22912 21143 23466 21771 21681 22477 21544 23400 21492 22042 22151 22064 23515 21287 22544 21100 23434 21986 4432 10423 11697 14748 15748 15228 16858 16548 17029 19040 32979 29616 28264 26208 26054 24624 24041 24668 23187 24093 23296 23385 23135 23016 23043 23356 22340 22871 22809 22628 23021 22584 22424 22924 22135 23205 22494 22519 22408 22775 22208 23153 22105 22657 22612 22358 22288 23116 21979 22572 22394 22336 22246 23152 22049 22496 22395 22401 22194 23121 21620 22793 22302 22491 21846 23200 22103 22425 22196 22827 21696 23044 22329 22336 21606 22835 21958 22441 22279 22987 21604 22636 22109 22808 21740 22978 22502 22413 21817 22609 22277 22445 21578 23039 22307 22577 21717 22643 22148 22605 21632 23101 21949 22320 21810 22745 22263 22331 22007 23158 21987 22166 22059 22827 21776 22373 22097 23169 21760 22343 21864 22938 21842 22387 22219 23068 21623 22439 22292 22552 21685 22743 22506 22435 21817 22503 22247 22434 21709 22904 22521 22464 21885 22565 22247 22336 21743 22963 22449 22585 21659 22496 22227 22548 21613 22657 22645 22599 21381 22386 22333 22796 21815 21991 23334 23279 21554 21681 21952 22864 22209 21186 22290 23802 22367 21437 21543 22683 22436 21297 22978 23392 21535 21556 21871 23063 21569 21522 22910 23553 21771 21411 12545 15785 16968 16765 17279 19593 20069 19131 18284 31182 28547 26158 24866 24733 24493 23296 23399 22967 23502 22628 23012 23099 23029 22336 22665 22841 22295 22533 23142 22574 22340 22340 22855 22288 22535 22748 22853 21992 22513 22314 22720 21735 22953 22669 22577 21806 22581 22231 22603 21967 22903 22432 22224 21907 22698 22016 22301 22205 23042 22016 22375 22008 22768 21969 22293 22360 23167 21545 22560 22150 22469 21797 23237 21842 22691 22040 22686 21625 23095 21841 22693 22122 22528 21810 23120 21812 22397 22248 22316 22543 22515 21888 22732 21693 22736 22203 22616 21977 22531 21947 22881 21587 22594 21977 22560 22381 22329 21984 22837 21642 22946 22272 22191 22249 22210 21991 23183 21566 22710 21978 22400 22373 22480 21745 22691 21495 23032 22186 22413 21894 22384 22037 23040 21643 22417 22113 22339 22519 22319 21768 22721 21877 22752 22091 22470 22065 22423 21936 23047 21541 22576 22221 22083 22528 22511 21760 22770 21801 22670 22221 22485 21992 22628 21848 23027 21476 22507 22130 21921 23132 21832 21932 22678 21429 23561 21187 22279 22501 21497 23301 22267 21662 22852 21411 22556 23095 21536 21867 22377 21488 23744 15607 18580 18582 19767 21277 19558 20133 20961 19734 22224 24874 24320 24128 22649 23413 23892 21643 22854 22427 22210 23703 22032 22427 23192 21419 22891 22627 22200 22627 22325 22782 22588 22309 22145 22537 22133 23059 22103 22179 22528 21993 22517 22593 22070 22489 22216 22388 22516 22263 22161 22506 22198 22881 21657 22481 22184 22308 22633 22160 22138 22454 21968 22898 21817 22559 22194 22215 22386 22677 21867 22598 22099 22365 22488 22199 22004 22544 21815 23125 21708 22444 22189 22247 22336 22491 22060 22839 21495 22927 22165 22285 21863 22490 22029 23026 21524 22633 22089 22304 22272 22923 21640 22573 22080 22360 22418 22486 21712 22725 21632 22864 22250 22219 21760 22840 21419 23090 21863 22596 21985 22633 21708 23125 21549 22235 22161 22300 22417 22609 21782 22583 21909 22421 22474 22321 21698 22862 21454 23156 21582 22552 22073 22386 21880 23168 21474 22508 22154 22327 22002 23053 21628 22545 22170 22440 22421 22247 21959 22764 21645 22851 22295 22214 21966 22552 21683 23074 21654 22404 21968 22357 22560 22225 21871 22672 21687 22944 22097 22336 22048 22569 21713 23161 21578 22381 22329 21932 23156 22115 21744 22825 21539 22563 22917 21425 21957 21952 22121 23450 21217 22162 22454 21380 23289 22055 21766 23088 21125 23072 21788 21800 22688 21267 23232 22454 21744 22904 21074 22967 23024 21266 21912 22587 21256 23628 22005 21721 22295 21945 22083 23209 21863 21366 22638 21661 22592 22436 22101 22215 22253 21902 22868 21864 22347 22360 22027 22444 22509 21866 22304 21989 22422 22722 21929 21958 22757 21657 22774 22350 22321 21929 22448 21901 22839 22057 22170 22257 22143 22502 22361 22023 22694 21818 22475 22542 22177 21927 22643 21708 22864 22110 22419 22171 22173 22389 22546 21687 22688 21840 22514 22293 22311 21869 22805 21527 22814 22215 22252 21753 22786 21569 22982 21609 22496 22222 22090 22167 22752 21572 22477 22128 22305 22432 22236 21702 22828 21685 23056 21657 22592 22184 22259 22360 22599 21939 22811 21534 22971 22091 22338 22009 22322 22139 22836 21657 22748 21775 22879 21940 22583 21858 22619 21781 23055 21488 22530 22028 22471 22343 22305 22023 22520 21894 22785 21869 22690 21742 22823 21819 22461 22173 22162 22438 22094 21971 22368 22346 22114 22154 22132 22485 22291 22218 22326 22144 22427 21841 23365 21231 22944 22115 22284 22008 21504 22433 22042 21399 23689 21508 22635 23137 21574 22352 23715 21601 21895 22352 22824 22552 21688 21168 22562 22592 23216 21633 21297 21544 22818 23393 22368 103 1181 4389 7239 8839 11312 12199 13831 13479 14000 39623 35280 31872 29696 28266 26671 26181 25223 25019 24279 24389 24039 24118 23908 24008 23758 24000 3561 8916 11056 13742 13913 15357 15394 16277 16135 42561 35656 32471 29903 28434 27205 26189 25371 25146 24192 24253 23986 24380 23785 24196 23011 23377 22879 9846 13044 15225 16256 17353 16897 18573 18332 19527 36599 31801 28179 27657 26220 25868 24907 24663 23607 24199 23785 24432 23168 23482 22731 23783 23440 11063 13903 16755 17539 19401 18743 19644 19280 20539 20342 31186 27320 26730 25190 25351 23745 24139 23799 23929 23117 23257 22839 23949 22749 23293 22354 23472 17095 19133 19078 20497 20500 21399 20554 21236 21254 21559 25623 24790 24128 24473 23296 23367 23222 23433 22890 22848 22544 23629 22544 22843 22539 23336 22703 22583 22403 23488 22336 22448 22308 23321 23047 22063 22314 23415 22395 22204 21741 23269 23409 22225 21840 24007 22096 21570 22811 23064 22802 21706 22243 23912 21993 21600 22967 22637 21842 22047 22894 23432 21734 22715 23558 22316 21318 22204 22880 22800 21834 22389 23148 22064 22309 22453 22675 21963 22247 22380 22951 22425 22096 22756 22448 21954 22531 22352 22344 22102 22701 22445 22230 22312 22930 21495 22375 22510 22506 21751 22733 22285 22377 21952 22796 22097 22254 22376 22792 21736 22814 22436 22528 22050 23203 22192 22301 22317 22693 21669 22789 22001 22512 22026 22794 21647 22685 22104 22900 21836 22790 22515 22350 21984 23185 21989 22532 22314 22522 21658 23259 22025 22628 21783 22855 22246 22513 22133 23056 21739 22520 22512 22520 21736 23040 21902 22401 21831 22934 22383 22583 21861 23120 21952 22434 22333 22608 21790 22842 21965 22295 22026 22785 21932 22184 22176 22967 21721 22816 22477 22456 22090 23088 21797 22645 22403 22881 21732 22884 21921 22232 22192 22676 21918 22133 22450 22290 21449 22976 22401 21660 22667 22393 21243 22958 22989 21542 22683 22967 21075 22960 22909 21430 22429 23412 21443 22384 23317 21553 22269 23666 21611 22229 23446 21827 21191 23456 21867 21252 23095 22224 21968 21942 22645 22037 22130 22301 22810 21956 22336 22671 22159 22056 22757 22160 21996 22547 22368 21724 22315 22237 22735 21659 22581 22549 22439 21912 22849 22011 22279 22327 22503 21696 22598 22085 22668 21560 22602 22468 22769 21616 23011 21785 22309 22144 22836 21634 22427 22097 22904 21559 22851 22331 22601 21668 22787 22145 22541 21651 22809 22267 22307 21864 23016 21942 22427 21536 22867 22246 22569 21839 23260 21829 22387 21890 22960 22327 22436 21795 22757 21787 22762 21824 22732 22401 22683 21571 22497 21968 22679 21492 22811 22401 22439 21825 22981 21897 22346 22080 22669 22200 22229 22075 23101 21923 22184 22044 22825 22238 22149 21946 23049 21916 22118 21835 22642 22671 22145 21423 22407 22485 23139 21473 21719 22935 22253 21338 21433 22300 23604 21139 21557 21351 22899 23261 21464 20897 22348 22663 23079 21405 21850 23249 22256 21760 21648 22695 23623 21741 21569 21342 22472 22907 22017 22151 21737 22648 22628 22341 22163 22244 21904 22375 22375 22853 22119 22035 21754 22617 101 4199 6979 9125 10338 12003 12487 13685 13408 43663 37128 33626 30848 29144 26798 6389 10683 14112 14357 16051 16116 17161 17159 17679 42624 36728 32113 30400 28066 27881 8665 14409 15428 18059 17909 19347 18894 19838 19347 19924 34221 30823 28075 27525 26134 13723 16386 18631 19277 20264 19435 20615 20323 21627 20750 31744 28256 27314 25661 25264 24405 20157 19991 21457 21223 21672 21469 21812 21684 22309 27559 26750 24403 24736 23814 24051 23656 23540 23900 23273 23011 23693 22755 23580 22450 23448 23057 22926 23063 23194 22535 23585 22325 22904 23179 22963 22444 23867 22903 22068 22673 23249 22657 21936 22552 23765 21850 22062 23139 23260 22767 22007 21892 23456 22746 23709 22150 21841 21876 22468 23661 22763 21651 21632 21773 22190 22060 23626 22741 23951 23127 23287 22762 22579 22773 22277 22647 22130 22490 22185 22573 22361 22517 22387 22615 22437 22698 22741 22746 22762 22631 22745 22592 22742 22497 22139 22389 21896 22353 22236 23100 22426 22973 21878 22383 21813 22601 22182 22855 22548 22602 21828 22385 22077 23126 22144 23006 21904 22310 21886 22933 22459 22660 21816 22392 
