# Supplementary material for: An Active Feature Selection Strategy for DWT in Artificial Taste
Source: Hindawi journal article supplement (doi:10.1155/2018/9709505), 2018-01-01
Supplement: f1 [file 9709505.f1.zip › maofengTea-med-3.txt]

43466 43480 43465 43481 48 10951 18150 19785 21451 21404 22636 22040 22986 22181 23112 21738 22699 22164 22616 22176 23004 22700 23144 22913 23130 22859 22360 22394 22856 22309 22716 22586 23076 22741 23462 22748 23401 22615 22921 22246 22759 22288 23001 22938 23272 23726 23267 23559 22705 22449 22289 21900 22520 22833 23529 23243 23996 22471 23473 22855 22537 22217 22116 22001 22321 22427 22906 23431 23489 23853 22740 22915 22435 22037 22545 23025 23467 23104 22932 22999 22811 22827 22348 22869 22827 23342 22970 23424 22693 23142 22770 22695 22516 23022 23032 23140 23149 23144 22976 22968 22487 22854 22594 23154 22827 23495 22553 23222 22528 23046 22397 23085 22708 23330 23042 23237 22789 23200 22361 22921 22688 23499 22700 23552 22518 23110 22192 23120 22743 23413 23010 23185 22823 23460 22396 22863 22547 23317 22784 23630 22541 23691 22477 23261 22337 22912 22284 23341 22965 23367 23119 23168 22551 22967 22352 22969 22540 23515 22765 23649 22487 23240 22592 22928 22298 23209 22651 23287 22965 23243 23129 22967 22615 22905 22493 23148 22881 23577 22833 23474 22620 23176 22397 22868 6535 16791 18156 19261 19508 19717 19517 19908 19424 19656 29816 25908 24739 24903 23968 24646 23018 23664 22731 22692 22669 22365 22359 22715 22815 23719 23949 23447 24052 23067 23485 22807 22714 22695 22073 22280 22308 22727 23176 23945 23375 23828 22995 22953 23025 22502 22919 22603 23054 22710 23112 23080 23446 23056 23538 22758 23230 22936 22811 22583 22825 22444 23118 23032 23384 23145 23302 23087 23056 22640 22915 22391 22952 22488 23095 22699 23236 22794 23448 22757 23649 22568 23560 22676 23558 22925 23100 22336 22981 22261 23168 22528 23330 22721 23433 22740 23405 22970 23272 23054 23152 22867 23232 22670 23157 22294 23065 22282 22941 22366 23079 22389 22911 22344 23013 22322 22870 22580 23065 22618 23104 22680 23504 22795 23209 22625 23317 22807 23601 22820 23591 22870 23602 22824 23505 22893 23319 22838 23198 22625 22807 22343 22740 22528 22820 22945 23240 23077 23164 22340 22997 22707 23479 22700 22770 22829 23249 22840 22311 22746 24097 22377 22387 23285 23304 22920 22186 22785 24007 23068 22203 22640 23072 23415 22263 22608 24020 22373 22714 23386 22109 23038 22413 23068 23402 22395 23863 22016 23523 22247 23377 23049 17468 19921 20348 20870 21234 21650 20935 21485 21584 32904 25369 24689 23517 23307 22968 23186 23051 23472 23222 23608 23311 23738 23143 23440 22864 23054 22599 22976 22665 23424 22864 23321 22687 23124 22567 23050 22369 23028 22758 23570 23045 23558 22820 23035 22326 23337 22800 23313 22530 23136 22296 23235 22938 23626 22741 22923 22464 23452 22734 23173 22376 23229 23019 23244 22258 23183 22676 23145 22365 23118 23032 23288 22372 23479 22547 23062 22809 23576 22542 23034 22632 23072 22647 23558 22336 23379 22328 23295 22727 23224 22656 22932 22954 22937 22738 23142 22554 23260 22690 22976 22704 23364 22841 23002 22883 22928 22849 22746 23030 22949 22648 22948 22814 23312 22370 23655 22535 23081 23072 22564 22582 23709 22101 22941 23218 22212 22666 22964 22016 23048 23374 22150 22583 24005 22589 22458 23633 23376 22073 22748 23165 23085 21820 22664 23762 22455 22292 23665 23239 22661 21893 22416 23972 23178 22126 22157 22952 23113 23223 22661 22789 22504 23352 22900 23236 22616 22784 22684 23048 23178 23004 22528 22825 22504 23317 22784 23485 22920 23003 22371 22948 22819 23177 23204 23290 22617 23018 22370 23006 22412 23229 16536 21329 21099 21972 21504 21920 21424 22071 21568 22154 25344 24279 23510 23661 23337 23604 22999 23570 22631 23200 22370 23052 22433 23099 22650 23472 22657 23537 22691 23701 22736 23727 22756 23490 22642 23481 22624 23033 22346 23005 22375 23040 22364 23016 22358 22905 22602 22993 22329 23176 22331 23115 22354 23026 22496 22683 22483 23140 22336 22970 22361 22954 22296 22768 22400 22852 22459 22980 22481 22937 22705 23148 22704 23198 22876 23490 22829 23508 22812 23525 22775 23558 22736 23429 22601 23288 22646 23346 21984 22818 22663 22558 22232 22141 22005 22057 22065 22642 22288 22759 22869 23332 23084 23336 23705 23460 23830 23296 23888 22969 23500 22614 22940 22784 22192 22790 22492 22390 21922 22170 22094 22647 23152 23316 23249 23151 23093 23109 23100 23040 22903 22644 22860 22513 22645 22611 22926 22943 23388 22921 23357 22695 23079 22528 22960 22388 22786 22503 23147 22924 23175 23160 23075 22680 22888 22350 22809 22592 23451 22695 23681 22714 23463 22499 23015 22216 23062 22657 23344 23020 23179 22682 23287 22263 22817 22472 23331 22668 23604 22548 23581 22496 23016 22209 22856 22471 23182 22799 23363 23141 23213 22853 21410 21378 22172 21406 22330 22030 22818 22122 23061 26246 24342 22921 23413 22612 23001 22712 23552 23153 23289 22855 23277 22388 22888 22426 23326 22743 23672 22730 23588 22578 23029 22451 22923 22588 23398 23112 23126 22857 22951 22485 22757 22629 23225 22851 23608 22675 23217 22622 22795 22313 23162 23083 23207 23088 23175 23059 23130 22444 22419 22496 23156 23170 23956 22625 23469 22844 22316 21872 22189 22441 23296 23553 23139 23524 22935 22178 22075 22019 22621 23089 24011 22956 23661 22409 22376 22103 22362 22740 23420 23891 22830 22845 22560 21901 22103 22437 23185 23127 23205 22980 22708 22889 22417 23017 22809 23372 22870 23402 22775 23171 22692 23145 23040 22840 22558 22820 22545 23066 22813 23192 22952 23243 23040 23163 22858 23089 22456 22889 22705 22840 22415 22984 22385 22794 22311 23060 22390 23095 22528 23142 22984 23300 22791 23056 22325 22984 22549 23486 22449 23142 22881 23268 22454 23527 22276 23174 22613 23001 22646 22933 22916 22917 22599 22874 22976 22887 22791 23126 22531 23568 22242 23497 22385 22943 22742 23642 22309 23032 22759 23277 22871 22957 22375 23296 23033 23528 22485 22937 22434 23221 22768 21490 21298 22600 21878 23176 22696 23134 22179 22700 22125 23933 22960 23298 22581 23061 22630 22930 22514 23398 23015 23533 22918 23271 22832 22923 22361 22861 22752 23224 22800 23052 22539 23041 22497 22807 22464 22976 23033 23520 22985 23211 22498 22774 22855 23243 22741 22609 22107 22363 23285 23994 23004 22667 21888 23318 22934 22707 21996 23601 23644 22297 22343 23424 22777 22026 22722 23943 22026 22988 22884 22208 23481 23352 21972 23440 22507 22777 23684 22037 23334 22696 22480 23974 21876 23414 22368 23440 22957 22967 22991 22903 23047 22841 23012 22636 23176 22748 22980 22734 23120 22746 22867 22984 22999 22965 22892 23195 22681 22880 22772 23146 22659 22789 22907 22753 23195 22588 23505 22260 23127 22353 23232 22876 22942 23049 22879 22679 22928 22749 23309 22384 23605 22438 23169 22993 22867 22603 23110 22376 23245 22280 23462 22608 23075 23004 23046 22576 23580 22365 23112 22974 22952 22407 23289 22309 23184 22662 22905 22465 23543 22246 23088 22871 22896 22456 23440 22322 23062 22916 22939 22512 23532 22392 23151 22848 23052 22620 23535 22575 22979 22744 23319 22183 23328 22704 22853 22582 23253 22450 23391 22677 22797 22794 23281 22265 23179 22572 23075 22423 23209 22528 22930 22521 23350 22191 23100 22840 23073 22479 23441 22779 22784 22571 23148 22626 22864 22455 23565 22583 22753 22720 23100 22887 22807 22496 23469 22784 22624 22646 23006 23046 22905 22516 23302 22697 23305 22620 22829 22614 23245 22697 22663 22484 23511 22869 23097 22199 22753 23186 23123 23346 22871 21965 22343 22391 24023 22812 22167 21909 22738 23653 23396 22825 22137 22396 23366 22768 23911 22336 22362 22631 22796 23729 23241 22508 22103 22378 22858 22625 23891 23337 22624 21977 22457 22784 22805 23883 23399 23249 22640 22096 22006 22635 22701 22960 23078 23185 22922 22985 22450 22818 22480 22858 22582 23392 22841 23303 23040 22994 22629 22746 22492 23134 22839 23014 23105 23202 22859 22944 22361 22849 21993 23281 22677 23459 22871 23077 22480 22615 22549 22999 22957 23301 22960 23030 22385 22857 22535 23149 22493 23508 22760 23190 22272 23141 22690 23097 22971 23284 22648 23024 22288 22890 22470 23360 22568 23592 22560 22995 22194 22994 22384 23115 22863 23314 22867 23226 22377 22787 22375 23000 22572 23434 22728 23289 22535 22834 22611 23200 22688 23095 22759 23162 22260 23072 22565 23245 22459 23321 22593 23162 22552 22859 22777 22945 22795 23045 22694 22957 22642 23306 22400 23408 22596 23016 22392 23160 22962 23439 22573 14600 17586 19329 19427 20504 20084 21000 20235 20535 43457 27456 25032 24425 23236 23337 22912 23853 23226 23346 22678 23333 23155 23527 23072 23131 22513 23252 17904 20999 20861 21217 20874 21731 21612 21993 21892 33148 24698 24184 23504 24421 23007 23159 23634 23750 22390 22887 22921 23735 22001 22754 23923 22951 6713 21095 21741 21025 21341 22544 21688 21334 21729 23019 26983 23960 24602 23407 22600 24003 23623 22321 23112 23661 22794 22641 23373 22857 22140 23072 23385 16647 21141 23144 21669 22028 22907 22125 22484 22629 22356 24628 23945 22905 23308 22866 23369 23159 22965 23265 22951 22824 23328 22563 23117 22490 23412 22837 21523 22531 22512 22375 22595 22728 22648 22532 22569 22368 24004 22669 23484 22695 22938 23060 23645 22598 23001 22806 23384 22600 22817 22368 23002 22935 23630 22788 22996 22596 23493 22549 22932 22758 23637 22562 23022 22723 23236 22248 23416 22861 22932 22807 23099 22313 23524 22564 23208 22615 22920 22843 23383 22300 23424 22486 23289 22791 23040 22539 23022 22951 22897 22684 23022 22621 23315 22497 23108 22519 23469 22471 23116 22480 23194 22736 23154 22465 23353 22576 23111 22792 23018 22490 23052 22716 23332 22491 23552 22366 22976 22983 22985 22770 22855 22912 23142 22558 23478 22487 22992 22855 22796 22627 23216 22379 23074 22657 22869 22840 22806 22722 23276 22377 23061 22702 22905 22472 23060 22673 22386 22807 23319 21954 22164 23758 22704 22262 23808 23159 22217 23224 23376 22102 22857 23117 22785 21933 23020 23111 22101 22400 23840 22053 22632 23735 23248 22008 22906 22963 23193 21973 22503 23720 23343 22056 22363 22635 23919 22037 22394 23245 22965 22773 22497 23015 23022 23201 22324 23090 22630 23168 22401 22964 23115 23145 22764 22688 22528 23238 22901 22837 22320 22972 23116 23048 22299 23217 22786 23318 22396 22876 23034 23269 22554 22701 22760 23402 22788 23021 22264 23103 22901 23132 22200 23139 22596 23464 22464 23107 22843 23287 22668 22908 22445 23530 22640 22808 22257 23144 22890 23329 22188 22923 22400 23522 22693 22965 22338 22988 23007 23319 22305 22892 22405 23568 22740 23112 22252 23031 22651 23239 22632 23020 22388 23280 22618 23488 22551 22792 22402 23109 22952 23207 22535 22789 22432 23467 22743 23116 22169 23168 22727 23222 22876 23040 22231 23169 22533 23526 22812 22778 22535 22933 22991 23316 22679 22827 22370 23122 22583 23458 22791 22839 22563 23057 23104 23080 22349 22865 22536 23528 22785 22754 22350 23312 23063 23221 22311 22504 21927 23841 23116 22970 21997 22480 23207 23154 23411 22135 22262 23048 22852 23840 22744 22149 21912 22709 23745 23464 23153 22192 22252 23367 22829 23779 22728 22156 21986 22145 23535 23343 23204 22336 22287 23203 22889 23825 22797 22333 22698 22848 23435 22800 23313 22619 22712 22656 22975 23148 23066 22496 22597 22877 23224 22917 23240 22732 22644 22444 22916 23046 23133 22467 22746 22498 23296 22791 23006 22538 22971 22812 23079 22961 23026 22304 22860 22906 23418 22768 23247 22522 22753 22438 23063 22944 23303 22402 22858 22505 23405 22579 23447 22421 22939 22325 23097 22843 1303 17232 19267 19353 20427 19977 21122 20491 21016 20299 31008 25376 24605 23818 23808 22757 18577 20441 21956 21371 22028 21136 21676 21411 21984 33380 25864 23933 23800 23093 23643 18001 21787 21536 22004 21536 22433 22188 22785 21831 22432 24722 24582 23536 23642 22712 17296 21835 22561 22108 22416 22157 22879 22391 23015 22167 25415 23906 23694 23025 23125 22855 22684 22457 22797 22127 22737 22818 23160 22130 22875 24717 23988 22986 22871 22915 23251 23417 23033 22134 23256 23164 22286 22688 23382 22546 22340 22919 22880 22955 23400 22361 23644 22756 22344 22793 22240 23698 22850 22503 22915 22076 23736 23288 22213 23266 22493 22220 24008 22759 22016 23262 22800 22573 22406 23677 23687 23205 22592 22765 22421 22813 22448 22984 22471 22823 22496 22592 22504 23040 23090 23259 22400 22940 22976 22727 23111 22883 22700 22979 23093 22908 22753 23047 22324 23128 22437 22791 22833 23305 22466 22999 22929 23096 22740 22883 22445 22806 22272 22867 22471 23082 22704 23075 23009 23287 22778 22969 22250 23015 22505 23564 22455 23072 22835 23264 22068 23494 22725 22907 22656 23304 22231 23424 22781 
22589 21226 22984 22231 21824 21440 23187 21487 22524 21750 21666 22987 21335 21916 21593 22512 21946 21669 22049 22219 22435 21711 22306 22356 21747 22487 22051 22074 22308 22483 21605 22419 22088 21847 21898 22164 22164 22071 21796 22256 21446 21813 21449 22173 21808 22429 21760 22724 21651 22471 21609 22131 21384 22173 21582 22353 22119 22379 22078 22327 21819 22355 21649 22223 21378 22010 21523 22353 21852 22693 21741 22693 21871 22182 21488 22121 21789 22532 22305 22409 22048 22452 21497 22110 21476 22407 21864 22851 21809 22713 21665 22187 21543 22136 21763 22369 21920 22514 22200 22295 21889 22410 21542 22063 21813 22665 22039 22769 21748 22400 21603 22001 21447 22217 21938 22469 22396 22177 21794 21632 21397 22011 22224 23186 22016 22621 21500 21304 21151 22169 22501 22680 23044 22058 22080 21647 21115 21412 21676 22538 22431 23117 22119 22944 21707 21805 21253 21650 21882 22535 22818 22098 22431 21812 22353 21672 22047 21816 22325 22268 22292 22427 22049 21870 21930 21783 21877 21840 22357 22151 22583 21943 22562 21748 22004 21527 22296 22193 22385 22177 22447 22161 22240 21902 139 1877 6394 8030 10097 10069 11520 11332 12389 12057 35605 28372 26588 24523 24406 23437 23408 22794 22999 22332 22231 21968 22368 21859 22258 21965 22631 22121 22888 21944 22957 21732 22856 22120 22459 21590 22164 21495 22332 21836 22551 22156 22350 22160 22379 21719 22295 21556 22279 21431 22230 21645 22439 21821 22688 21856 22789 21829 22432 21795 22224 21570 22134 21780 22469 21980 22481 22233 22373 22107 22280 21905 22331 21552 22055 21512 22066 21751 22278 21954 22634 22033 22791 22306 23139 21768 22727 22077 21895 21257 21313 21203 21449 21280 21698 21276 21969 22071 22509 22615 22632 23017 22276 22895 21977 22341 21720 21778 21872 21316 21435 21529 21846 21504 21601 21893 21716 21911 21664 21965 21547 21958 21701 22057 21669 21987 21813 22089 21984 22171 22004 22352 21951 22241 21938 22217 21504 22117 21634 22011 21753 22006 21786 22535 21889 22637 22009 22396 21561 22333 22149 22409 21762 22055 21689 22791 21912 22049 21672 22447 22009 22147 21632 22841 21898 22229 21584 22407 21921 22179 21812 22627 21937 22187 21617 22368 22042 22218 21890 22176 21786 22583 21515 22791 21460 22439 21674 22511 21771 22392 21424 58 6871 11840 13063 14488 14512 16240 15726 16303 15766 38941 28968 26277 24014 23841 22652 23116 22207 22561 21860 22238 21765 22450 22208 22796 22336 22885 22215 22493 21783 22152 21808 22272 22065 22519 21865 22340 21772 22400 21351 21856 21591 22534 22567 23226 22364 21745 21098 22052 22301 22505 21707 21737 21040 22001 22809 22993 21733 21309 21863 22556 21772 21463 21792 23239 22448 21582 21578 22701 21728 21642 21500 23155 22004 21418 22409 21783 21633 21984 22647 21665 22420 21868 21965 22197 22324 21745 22247 21709 22573 21785 22359 21971 22034 22368 22001 22151 21968 22228 21943 22112 22000 22231 22063 22040 22024 22221 22314 21729 22458 21708 22425 21616 22697 21702 22339 21977 22144 21904 22325 21660 22566 21607 22505 21915 22176 21773 22601 21406 22646 21860 22186 21714 22566 21844 22095 21647 22732 21655 22376 22050 22533 21472 22359 21819 22456 21396 22412 22031 22388 21435 22354 21657 22697 21674 22246 21945 22564 22058 22400 21546 22401 21626 22897 21760 22092 21592 22425 22076 22505 21623 22146 21622 22274 21792 22727 21900 22394 21639 22032 21663 22184 22183 22521 21988 22336 21565 22085 21641 22419 21765 22687 8950 15266 16410 17361 17306 17824 18007 19081 18866 18983 29980 25723 24333 23607 22944 22503 21712 21859 21416 21551 21815 22160 22165 23043 22239 23265 22350 23177 22535 22871 22389 22228 21617 21657 21198 21470 21117 21410 21192 21698 22040 22121 22165 21841 22477 21904 22493 21927 22436 21796 22393 21937 22528 21869 22503 21977 22409 21922 22285 21778 22170 21701 22121 21746 22294 21745 22069 21679 22023 21588 22069 21640 22074 21595 22224 21920 22402 21908 22538 22091 22505 22267 22583 22212 22437 22226 22444 22208 22354 22046 22343 21935 21743 21719 22416 21541 22229 21504 22117 21558 22038 21776 22161 21740 22425 21915 22659 22007 22725 21869 22746 21644 22897 21668 22815 21725 22633 21587 22345 21541 22099 21373 22223 21780 22421 22110 22548 22161 22696 22113 22296 21913 22344 21660 22172 21458 22064 21679 22615 21965 22753 21862 22704 21880 22382 21751 22082 21418 22112 21774 22366 22240 22432 22148 22293 21624 22085 21674 22294 21958 22477 21995 22826 21809 22567 21688 21888 21347 22135 22279 22597 22899 22055 21988 21729 21031 21609 21813 22461 22457 23136 21979 22727 21424 21675 21179 21536 21664 22356 22452 22595 7897 17037 19399 19282 19293 19500 19269 19869 20245 21088 29730 25556 23565 23022 22340 21993 22149 21985 22539 22183 22805 22020 22397 21954 22004 21805 22250 22409 22408 22420 22285 22236 21991 21760 21930 21862 22519 21990 22728 21809 22391 21877 21956 21756 22391 21991 22467 22235 22291 21738 22151 21602 22331 21644 22422 22059 22784 21809 22469 21753 22109 21616 22440 22100 22456 22153 22413 21760 22253 21511 22184 21615 22536 21977 22824 21776 22413 21824 22146 21471 22274 22033 22600 22185 22407 21815 22518 21420 22209 21956 22700 21770 22672 22108 22424 21751 22144 21592 22606 22246 22288 22144 22708 21538 22130 21607 22535 21811 22789 21843 22880 21865 22704 21716 22469 21873 22131 21527 22112 21620 22400 21923 22532 22171 22585 22188 22289 22082 22369 22104 22251 21817 22487 21720 22176 21840 22289 22023 22315 22132 22491 22163 22370 21477 22034 21990 22832 22156 21720 21637 22304 22328 21489 22212 21872 21851 22663 21129 22935 22057 21947 22272 22093 22200 22040 21495 23024 21382 22459 21233 22707 22364 21529 22453 21920 21191 22381 22997 22137 21100 22241 22347 22183 21495 21346 21504 22357 22700 22229 22154 21610 22122 18459 20685 20703 21303 20720 21508 21492 21884 21598 29428 23506 22679 22409 22544 22235 22329 21987 22125 21760 22016 21880 22599 22347 22758 22245 22569 22123 22135 21495 22315 22152 22380 21989 22427 21672 21789 21867 22017 21717 22546 22159 22689 21895 22133 21789 22537 21902 22331 21815 22109 21906 22808 22144 22375 21491 22604 21726 22386 21493 22693 22095 22215 21736 22503 21789 21987 21920 22724 21579 22600 21722 22087 22202 22458 21753 22469 21425 22709 21878 22333 21795 22235 22003 22438 21905 22325 21463 22733 21668 22423 21480 22716 21621 22507 21431 22880 21523 22574 21385 22941 21520 22583 21521 22821 21589 22448 21527 22664 21833 22392 21863 22521 21933 22216 22177 22078 21824 22269 21909 22520 21573 22676 21687 22419 21560 22548 22005 22368 22167 22188 21871 22514 21596 22448 21543 22635 21985 22032 22341 22215 21861 22680 21444 22251 22191 21637 22005 22075 21457 22477 21605 21846 22420 21390 22354 22651 21211 22584 22442 21651 21673 22699 21427 22057 22272 21712 21975 22572 21538 21901 22093 22104 21641 22535 21582 21608 21898 22515 21248 21861 22925 21565 21815 23173 22008 21713 23035 21818 22028 22381 22180 21913 22629 21873 22172 22373 22241 21719 22580 22105 21986 22115 22437 21763 22115 22236 22087 21741 22224 22260 22048 22045 22627 22167 21930 22032 22374 22121 21991 21628 22748 21982 21966 21920 22458 21962 22114 21703 22744 22096 22126 21518 22256 22244 22433 21760 22173 21907 22730 21904 22022 21622 22295 22183 22533 21598 22164 21715 22811 21931 22349 21586 22220 21834 22481 22195 22248 21637 22580 21728 22759 21778 22094 21589 22311 22173 22560 21859 22097 21606 22742 21975 22496 21729 22108 21591 22327 22039 22544 22069 22617 21446 22363 21696 22825 21992 22679 21952 22217 21454 22269 21829 22240 22184 22353 22261 22508 21637 22141 21639 22336 21646 22668 21808 22800 21981 22439 21652 22082 21552 22471 21980 22384 22202 22565 21993 22410 21619 22092 21687 22686 21821 22667 22006 22538 21929 21950 21760 22331 22120 22456 22152 22472 21760 22058 21640 22165 21813 22803 21907 22608 21897 22010 21736 22272 22291 22506 22027 22054 21206 21684 21592 22720 21879 23184 22289 22039 21150 21682 21586 22019 22702 22537 22940 22468 21511 21579 21144 21974 21681 23059 22275 22713 21973 21612 21601 22632 22779 22152 22351 21794 21752 21978 21796 22618 21934 22851 21797 22204 21744 21749 22151 22217 22580 21943 21993 21963 22077 22001 22199 22154 22352 21897 22072 21836 22457 22065 22325 22062 21895 49 7424 10149 11524 12692 13191 13147 13656 14040 43360 32516 27829 24914 24023 23141 23273 22822 22610 22023 22520 22235 22813 22249 22198 21770 22283 57 8557 13178 15213 15520 16939 16556 17959 17289 17940 38710 29482 25789 24670 23380 23040 22502 23293 22214 22582 22255 22931 21762 22498 21890 22662 21545 2581 13837 16954 17367 19148 18679 19017 18935 19693 19030 32155 26000 24821 22901 23144 22720 22872 22027 23073 22103 22437 22261 22680 21632 22653 22070 22253 11673 17955 19031 19848 19719 20741 19789 20910 20121 20717 27086 24200 23050 23249 22147 23073 21808 22599 21997 22455 21950 22455 21950 22677 21761 22864 21654 18377 19957 21265 20929 21698 20752 21977 20878 21656 28991 24506 22794 22550 22361 22401 21633 22747 22315 22581 21741 22280 22022 22456 21936 22498 21440 22114 22536 22931 21813 21824 22249 22235 21361 21959 22888 22186 21447 22569 21784 21441 22606 22740 21101 22765 21462 21652 23009 21449 22359 21895 21243 23087 21898 21925 22201 21497 22800 21797 22184 21872 21710 22848 21234 22638 21323 23151 21227 22581 21719 22436 22018 22250 22023 22249 21992 22060 22094 22290 21936 21992 21952 22120 22359 21891 22476 21838 22133 21952 22145 22066 21962 22257 22239 21917 22595 21605 22211 21773 22247 21975 21959 22126 22375 21472 22634 22057 21984 22275 22383 21719 22726 21806 22104 22183 22363 21529 22646 21935 21972 21832 22576 21562 22285 21717 22462 21433 22335 22136 22208 22072 22903 21740 22211 22094 22466 21533 22561 21955 22105 21867 22380 21641 22072 21651 22724 21605 22293 22053 22628 21321 22343 21731 22727 21641 22196 21963 22542 21869 22185 21704 22734 21793 22065 22019 22575 21893 22138 21764 22867 21904 22040 21678 22404 22023 22505 21409 22412 21693 22683 21771 22054 21943 22578 21737 22147 21746 22790 22051 22026 21674 22247 22245 22326 21562 22211 21760 22706 21883 21959 22016 22474 21828 22089 21559 22807 22073 21894 21593 22089 22672 22262 20986 22549 22135 22513 21401 21815 22463 22532 22382 21351 21660 22635 22190 22512 21360 21570 22360 22402 22105 21504 21382 22818 22246 22682 21673 21445 21654 22028 23017 22477 21095 21813 21829 23185 22373 21604 21113 21647 22656 22053 22439 21960 22107 21917 22317 22279 22380 21747 22037 21996 22506 22139 22008 21633 22167 22295 22389 21999 22097 21845 22599 21906 22528 21840 21964 21744 22156 22247 22394 21957 22043 21699 22631 22087 22514 21639 22209 22115 22437 22050 22123 21568 22433 21719 22459 21631 22131 21848 22412 22113 22448 21401 22212 21604 22816 21969 22082 21541 22321 22016 22471 21767 22183 21509 22439 21767 22695 21856 22131 21459 22322 22208 22588 21760 22229 21621 22547 21662 22737 21892 22247 21540 22328 22114 22581 21816 22167 21613 22401 21816 22795 21798 22161 21555 22813 21948 22538 21978 22225 21592 22372 21754 22868 21767 22278 21580 22189 21994 22330 22086 22242 21528 22321 21775 22755 21793 21978 21661 22304 22159 22630 21737 22056 21613 22468 21704 22696 21975 22097 21486 22054 22299 22459 21769 22010 21377 22311 21760 23073 22147 21637 21223 21705 22645 22637 22544 61 4921 10035 11638 14046 14002 14533 14086 14007 14243 37777 30261 26709 23927 22930 22659 9339 13961 17001 16650 16645 16913 17717 18760 18553 40290 29521 25036 23665 23581 23346 10759 15904 17912 18261 19540 19313 20042 19577 19429 41681 28802 25613 24040 23045 23105 11510 18356 19346 19879 20130 20616 20760 20955 20354 20700 27357 24951 23273 22746 22602 14739 19795 20936 20660 21516 21217 21944 20830 21634 21512 26369 23224 22867 22227 23073 22289 22567 21798 22736 22295 22547 21792 22855 22038 22245 22039 22752 21607 22810 21701 22425 21544 22813 21638 22564 21756 22249 22168 22241 21964 22344 21479 22829 21662 22492 21780 22439 21779 22840 21888 22153 21954 22413 21676 21992 21986 22678 22305 22759 22002 22481 21848 22478 21750 22493 21856 22685 22107 22819 21763 22277 21768 22487 21505 22740 21712 22227 21817 22499 21530 22248 21546 22462 21761 22101 22203 22226 21513 22409 21988 22391 21640 22061 21820 22487 22137 22498 22174 22400 22128 22430 21724 22229 21440 21888 22138 22895 22185 22480 21280 21857 22777 22402 21198 22602 22301 21459 21825 22540 21382 22107 22406 21579 21703 
21312 22034 21400 21829 21487 22040 21339 22293 21529 21830 21363 21612 21837 21767 21530 21712 21693 21816 21392 21906 21444 22211 21289 21817 21763 21704 21625 22196 21381 21831 21565 22038 21109 21884 21863 21751 21402 22254 21593 21688 21411 21943 21857 22070 21145 21664 21555 22148 21554 22330 21715 22292 21806 22040 21680 21992 21632 22151 21590 22097 21744 22221 21666 22247 21384 21724 21201 21609 21565 22101 22195 21728 21127 21235 22006 20764 21385 21832 22144 21799 22092 21628 21688 21517 21491 21467 21765 21912 21955 22052 21617 21680 21632 21359 21555 21433 21638 21747 22176 21705 22043 21545 21529 21403 21715 21849 22040 22056 21888 21812 21748 21384 21640 21344 21856 21715 22214 21493 21981 21601 21623 21272 21971 21824 22060 21754 21864 21296 21711 21365 21990 21701 22251 21600 22180 21211 21640 21299 21650 21490 22156 21689 22224 21907 21926 21510 21687 21227 21749 21656 22130 21738 22284 21499 22208 21047 21612 21192 21844 21646 22185 21888 21881 21545 21912 21225 21794 21255 21571 21577 22194 21783 22298 21447 21649 21312 21774 21584 21907 21799 22083 21912 21856 21659 13502 15758 17075 17525 18454 18223 19051 18492 19229 37954 24486 22295 21762 21440 22109 22287 22493 22784 21987 22603 21552 21689 21447 20960 21224 20776 21491 21719 22165 22096 22872 22033 22753 21465 22124 21241 21155 21019 20977 21112 21582 21640 21941 22080 21671 21993 21549 21687 21491 21506 21459 21395 21425 21780 21818 21878 22016 21824 21975 21680 21628 21743 21411 21571 21560 21623 21680 22059 21728 22190 21654 22166 21471 21728 21520 21479 21279 21747 21371 21952 21757 22106 21793 22084 21848 21989 21918 21904 21611 21815 21234 21796 21200 21681 21215 21511 21393 21774 21569 21978 21786 22340 21709 22304 21522 22284 21352 22043 21395 21839 21331 21956 21404 21993 21341 21870 21484 21590 21485 21645 21311 21724 21176 21628 21277 21699 21262 21762 21224 21778 21352 21744 21253 21693 21193 21665 21225 21565 21368 21667 21745 21965 21467 22261 21626 22279 21575 21684 21397 21913 21962 21982 21205 21763 21513 22390 21349 21360 22228 22304 21145 21664 21704 22485 21283 21337 22007 22369 21241 20992 21319 22817 21662 21177 22003 22313 21303 22278 21876 21233 22635 21203 21372 22417 20854 22282 20922 22885 20748 22368 21549 10501 18166 18594 19605 19456 19717 19754 20384 20253 19915 26014 23242 22435 22201 22145 22080 21815 21760 21639 21848 21554 21590 21500 21523 21385 21831 21853 22122 21991 22102 21640 21760 21320 21530 21536 22000 21748 22010 21519 21792 21323 21699 21259 21783 21720 22240 21744 21911 21154 21765 21576 22016 21415 21696 21261 21841 21834 22242 21512 21624 21670 22048 21472 21660 21624 22369 21740 21668 21453 22065 21404 21718 21652 22246 21411 21852 21636 22225 21287 22230 21760 21692 21740 21263 21367 22364 21124 22121 21860 22057 21712 21773 21549 21674 21836 21933 21643 21853 21581 21981 21621 21805 21753 21811 21704 21704 21860 21586 21571 21754 21691 21795 21430 22144 21269 22000 21298 22019 21682 21435 21997 22141 20923 22727 21728 21368 22504 22147 21240 22872 21582 21211 22421 22247 20942 21527 21988 21824 20663 21511 22512 21330 21341 22636 22078 21120 21644 22048 21993 20929 21159 22477 22172 21442 20856 21417 22404 21867 21624 21353 21556 21869 21936 21883 21656 21529 21824 21559 22075 21812 21359 21417 21069 21883 21911 22026 21854 21336 21504 21696 21940 21636 22267 21767 21530 21316 21689 21572 21697 21812 21932 21961 18632 19760 20326 20086 20494 20375 20969 20585 21339 30074 24013 22337 22385 21828 21981 21472 21664 21212 21901 21404 21879 21752 21800 21912 22028 21824 22084 21878 22055 21538 21893 21288 21723 21159 21708 21136 21661 21481 21815 21799 22072 21440 22221 21408 22248 21615 22184 21376 22300 21391 22235 21411 22304 21574 22337 21632 22242 21393 22207 21408 22144 21425 22007 21523 21894 20917 21763 21531 21787 21514 21620 21321 21612 21323 21572 21217 21805 21512 21842 21623 22061 21745 22061 21876 22090 22003 22153 22212 22106 22455 21991 22288 21596 22155 21581 21710 21504 20949 21538 20789 21139 20720 21242 20787 21227 21299 21749 21677 22256 22185 22727 22184 22886 21807 22812 22001 22698 21529 22054 21668 21261 21156 20816 21277 21640 21852 21792 21993 21909 22114 21815 22092 21667 21807 21504 21511 21604 21523 21552 21876 22000 21932 21974 21873 21868 21726 21505 21645 21344 21512 21825 22007 21776 22250 21508 21799 21691 21538 21289 21902 21456 21912 22007 21936 21916 21835 21315 21621 21506 21940 21799 22322 21449 22205 21618 21689 21177 21797 21496 22064 21874 22039 21909 21836 21504 21789 21241 21655 21585 21901 21671 17689 20371 21557 20797 21603 20915 21127 20744 21570 21353 24104 22378 22316 21941 21909 21584 21850 21237 21827 21656 22447 21564 22208 21477 21792 21233 21800 21355 21931 21799 21985 21893 21860 21369 21763 21335 21909 21737 22314 21529 22135 21507 21635 21304 21672 21623 22103 21894 21981 21703 22041 21229 21509 21323 21760 21701 22284 21648 22311 21896 21253 20918 21555 21885 22312 22517 22155 22252 21372 21205 21175 20711 21474 21971 22834 21760 22352 21392 21379 21091 21091 21415 22214 22534 22223 22432 21532 20989 21191 21249 22036 22161 22784 21543 22433 21702 20947 20964 21658 22002 21804 22093 21580 21705 21504 21647 21420 21696 21847 21965 22177 21943 22089 21842 21937 21685 21585 21624 21321 21583 21448 21673 21682 21956 21796 22192 21659 22254 21819 22073 21587 22191 21458 21934 21543 22058 21525 22231 21641 22285 21760 21909 21337 21651 21527 21771 21981 22026 21216 21991 21670 21819 21701 22151 21335 22194 21528 21969 21897 21704 21440 21671 21918 21691 21520 21632 21933 21639 21696 21793 21298 22400 21287 21963 21632 21928 21189 22206 21888 21796 21210 22008 21725 21854 21539 21700 21147 22062 21910 22231 21702 21732 20412 21751 21303 21760 21373 21444 21039 21911 21624 24742 22064 21969 21319 21833 21641 22088 21639 21929 21473 21725 21281 21677 21334 21796 21783 22231 22048 22159 21654 21672 21244 21752 21527 22215 21741 21963 21575 21849 21421 21600 21442 22199 22075 22171 21137 21447 21640 22220 21669 21701 21005 21717 21962 22801 21575 20961 22065 22042 21205 21203 22331 22557 20704 22003 22095 21611 20900 22748 21672 21319 22000 21585 21517 22788 20748 22312 21336 21433 22656 20935 22279 21547 21003 22855 20660 22368 21230 22328 21664 21867 21431 21884 21739 21880 21755 21815 21833 21709 21700 21871 21687 21917 21998 21994 21522 21928 21639 22097 21486 21719 21457 22072 21675 21602 21982 21463 22088 21277 22187 21419 21745 21797 21699 21880 21656 22018 21670 21524 22119 21360 22061 21348 22135 21802 21683 21952 21818 21561 22285 21317 21808 21591 21755 21699 21710 21545 22131 21304 22007 21760 21672 21686 22016 21549 22344 21553 21728 21900 22108 21280 22167 21753 21703 21837 22123 21360 22161 21763 21650 21731 22185 21234 22189 21664 21683 21641 22155 21323 21875 21485 22112 21232 21894 21800 21695 21436 22262 21358 21876 21678 21630 21537 22118 21277 21804 21802 21806 21347 22272 21429 21863 21879 22084 21413 22318 21672 21698 21511 21984 21618 21557 21489 22347 21477 21952 21800 22197 21259 21738 21519 22214 21632 21733 21863 22144 21300 21687 21491 22360 21626 21533 21557 21989 21908 21849 21404 21827 21514 22407 21349 21823 21781 22025 21740 21488 21363 22149 21869 22519 21632 21177 21153 21619 22502 22393 21128 21085 21344 22755 22257 21935 20839 21316 21992 22120 22466 21971 20962 21544 21467 22784 21945 21293 20741 21351 21860 21895 22621 22328 21948 21022 21477 22168 21865 22823 22119 21742 21074 21125 21106 21464 22301 21743 22199 21924 22019 21685 21485 21521 21581 21755 21653 22063 21997 21975 21765 21504 21430 21671 21660 21612 22212 21793 22136 21858 21747 21472 21689 21615 21767 22069 21905 21964 21904 21499 21637 21424 21863 21692 22178 21821 22074 21517 21595 21445 22161 21752 21957 21928 22060 21442 21556 21444 22036 21632 22210 21760 21781 21328 21697 21369 21829 21905 22038 21861 21973 21167 21687 21485 22114 21475 22373 21773 21997 21431 21600 21316 21691 21763 21821 21975 22023 21641 21664 21464 21909 21560 22152 21462 22159 21453 21568 21541 22365 21869 21748 21860 22071 21489 21857 21495 21983 21530 22044 21572 21594 21495 21895 21773 21944 21648 22027 21208 21901 21933 22202 21721 21996 21248 21824 16179 18013 18567 19093 19012 19267 18664 19370 19188 30137 24121 22800 21788 22337 22055 22137 21602 21619 21397 22126 21725 22123 21360 21669 21473 21927 9303 18749 19073 19757 19307 20650 20275 20908 20205 20157 26107 23453 22747 22448 21187 21968 21841 22240 20912 21665 22452 21947 21031 22373 22208 21200 21172 16391 19702 19624 20237 21984 19969 20541 21733 21439 20225 24553 23137 21719 21448 22151 21927 20945 21496 22670 20841 21493 22632 21126 21129 22915 21522 21345 19563 21304 20345 21277 21462 21015 21376 21441 21088 32920 23264 21863 22329 21720 22038 21906 21568 21911 21491 21915 21888 21489 22157 21557 21722 21796 21700 20753 21267 21664 21256 21544 21608 21737 21504 21728 24300 21904 22420 21507 21825 21755 21820 21226 21968 21850 22102 21358 21591 21720 22049 21581 21750 21314 21701 21909 22165 21303 21792 21696 21722 21396 21964 21824 21741 21294 22117 21845 21781 21860 21747 21544 21853 21222 22145 21665 21760 21692 21164 21479 22198 21171 22226 21325 21947 21690 21690 21612 21635 21894 21852 21713 21792 21625 22067 21655 21840 21497 22212 21524 21815 21719 22001 21453 21929 21632 21852 21657 21873 21779 21852 21376 22117 21261 22086 21173 22074 21735 21689 21845 21639 21433 22029 21338 22049 21254 22107 21697 21736 21875 21793 21417 22317 21458 21632 21984 21543 21389 22210 21331 21824 21866 21711 21301 22400 21404 21594 22401 21861 21065 22375 22040 21184 21413 22075 21696 21025 21592 22313 20668 21514 22602 21332 21385 22866 21408 21298 22356 22400 20864 21984 22000 21805 20818 21593 22583 21639 21111 22232 22157 21869 20704 21468 22696 22137 20892 22108 21894 21921 21494 21565 22153 21749 21617 21411 21700 21971 21915 21511 21979 21897 21824 21449 21504 22023 21939 21760 21461 21865 22199 21793 21469 21563 21864 21898 21697 21361 21900 21739 21965 21308 21639 21850 22016 21687 21604 21570 22250 21705 21595 21377 21825 22024 21841 21277 21806 21629 22112 21340 21671 21859 22093 21440 21648 21425 22245 21671 21833 21232 21845 21893 22107 21399 21612 21421 22228 21761 21721 21193 21798 21959 22214 21517 21639 21287 22165 21568 22265 21520 21761 21592 22016 21961 21956 21137 21704 21488 22293 21697 21774 21266 21911 21687 22090 21708 21692 21519 22219 21520 22176 21473 21591 21365 21907 21879 22024 21265 21696 21456 22337 21800 21862 21239 21669 21568 21880 21911 22062 21346 21577 21406 22290 21717 21656 21379 21817 21883 22170 21389 21573 21495 22231 21761 21526 21231 22017 22080 22317 21600 21331 21139 22039 21623 22659 21562 21363 21757 21966 22625 21791 20896 20963 21287 22684 22145 22163 20848 21127 21782 21965 22481 21952 20992 21038 21277 22588 22161 22347 21280 21115 21909 22004 22587 21931 20832 21012 21703 22008 21976 21856 21737 21390 21716 21590 22167 21869 21776 21422 21655 22021 21891 21952 21560 21489 21545 21571 22176 21859 21738 21400 22160 21830 21872 21799 21593 21638 21908 21625 22208 21623 21580 21410 21793 21815 22016 21745 21780 21335 21770 21456 22170 21736 21696 21315 21889 21768 21974 21815 21802 21280 21765 21450 22243 21729 21857 12179 17741 18423 19146 19311 19749 19024 19434 19222 19721 25592 23859 22281 22069 21561 8787 18560 20121 20033 20265 19897 20680 20293 21149 20569 27093 23015 22496 21990 22180 22121 18825 19747 20737 20505 21578 20972 21335 20659 21237 28356 23703 22379 22018 21382 22451 18776 20976 20656 21099 21225 21559 21384 21371 20842 21469 23082 22544 21576 21795 21984 19411 21048 21273 21287 21895 21518 21568 21060 21624 21795 23145 21434 21839 21543 22469 21709 21266 21403 21818 22359 21043 21383 22779 21016 21328 22642 21483 21805 22481 20951 22408 21157 21931 22146 21194 21916 21283 21965 22061 20961 22241 21236 21683 22528 20900 22007 21723 21056 22069 22643 21620 20964 22259 21611 21376 21180 21585 21850 21888 22109 21981 22208 22092 22231 22085 22152 21936 21834 21442 21773 21754 21876 21278 22051 21766 22050 21768 21624 21895 21718 21630 22080 21519 22001 21920 21474 21812 22137 21306 21527 21762 22000 21842 21871 21272 21610 21347 21633 21348 21731 21433 21733 21601 21873 21940 22084 21379 21562 21590 22169 21688 21547 21416 22011 21543 21690 21454 22159 21191 21888 21719 21555 21478 22170 
40992 38817 41898 36811 43083 39024 41560 41687 33397 36454 41545 34487 36665 35910 33077 34973 35143 36303 41529 37503 42340 40981 40946 36672 35776 35104 34356 40389 41833 36947 33752 38627 39074 37393 37135 35961 41840 41591 34210 34848 41913 38214 36892 39185 39406 34688 33360 39749 33521 41751 35611 41290 36612 38685 34855 38240 34204 39996 34066 39276 35687 40903 34851 41176 41810 35745 39792 34315 33566 39426 40735 35555 39127 40448 38792 37039 42713 37833 37416 39248 39499 41762 38552 42548 40137 39306 37880 38144 35512 36186 42859 43099 38795 39046 38737 40416 38374 39170 38472 36839 34742 41141 39738 43153 36117 33542 34832 35937 39235 41721 39846 40425 34549 41052 36901 35363 40694 43177 38737 34052 34323 40288 38331 36392 39067 36007 36889 40631 35690 41569 38614 35292 41249 34087 40184 40345 34503 40736 34608 42653 40358 35240 40642 37596 37687 32908 34965 40240 35961 34496 39684 35800 41312 43376 40815 38560 34310 39608 36789 34579 40359 37147 37283 33384 37248 40241 36214 40368 33808 33591 40282 36272 41494 42728 34736 40677 36148 33605 37252 36324 39296 37514 36765 34781 30012 33744 36514 31389 30481 38748 37723 31378 39148 35328 44511 41973 35850 42048 39975 41718 44017 36488 38394 34588 33142 34934 42390 37440 40162 35296 42800 35776 40135 39441 37476 38682 36193 42609 40134 40608 39588 38132 37542 38950 33979 34167 37735 39143 35032 38421 33574 34992 42810 33007 42320 42080 42344 36136 36425 37195 38337 36402 38327 34832 34352 35816 41936 33888 33300 34272 34623 39031 35465 40547 34777 40119 43057 35658 32725 42647 41082 35984 41760 37966 36080 39584 36166 39214 36848 38444 37742 37237 34338 36412 40224 36224 39704 34998 40221 33133 41491 36182 33504 38108 36108 41869 35651 41349 33152 41192 41591 39194 41925 37145 41258 38131 42007 38732 41527 37415 42870 34217 42810 34880 41152 35693 39529 34571 40612 35319 40417 35787 40073 35984 41328 35764 40233 35384 39780 34793 40136 33893 41424 34978 35531 38179 42822 41644 34643 41265 34016 34777 41751 37725 38119 38471 40088 35911 32864 42384 41699 41640 41108 41601 39511 34696 35060 43420 40944 41517 38986 42360 40684 37536 41216 36877 34792 39604 38738 41808 41223 41499 37279 40288 35111 39844 41888 42902 36505 41303 37132 37632 34928 42056 33792 28296 38041 32390 33069 31071 34230 34806 41321 40592 37063 40334 41607 43207 40960 40042 39246 36642 35529 34432 36645 33344 33754 42851 33337 41542 36884 36992 39803 38668 39648 34469 35436 40929 33336 32826 38178 35768 38637 33280 35783 41186 35363 40384 36252 35313 40817 35771 37546 39320 35888 33568 38168 42228 35200 40431 36791 36612 41000 33024 34102 34647 38624 42600 34983 34181 42118 35978 34666 42438 39292 42080 35654 34407 41047 42240 37097 34294 40627 40993 41144 35745 35061 35636 40663 41933 42576 39191 39919 36951 39028 35270 35908 33466 34699 36568 37856 34586 36896 33894 38312 34405 36300 35844 36339 35107 35079 36795 33751 33507 35713 35153 36068 42199 39974 40667 38544 40816 38733 34961 42286 38892 40256 37216 35970 35296 41490 43946 40279 40535 37524 33912 40010 43008 41537 37440 33248 38166 36342 34148 32816 43416 41391 41680 35104 39304 38880 34610 38628 38532 36948 39587 43725 40630 42400 36423 42088 42776 37414 34308 41363 33659 37066 37613 37384 34563 33002 36165 33593 39210 36389 41733 42346 38952 37476 37596 38656 37072 41191 32807 34720 37664 34304 41394 36097 33080 40723 35271 33515 34880 36224 37728 38106 32897 34656 40986 38848 32181 41386 37698 33254 41248 43027 40097 42032 42709 36720 38417 42565 34816 39991 37568 42000 37541 35840 36108 37368 38700 36400 39222 37289 39111 33232 37068 40619 35751 39495 35416 38940 34928 42688 36803 36281 39141 42231 41245 42004 41354 34682 40251 41556 41796 42230 41393 42245 41664 33944 41731 34356 40896 41905 41169 41996 39990 42258 38992 33140 37080 36984 35769 33171 36021 32859 34033 40983 34409 41104 33769 39888 36533 32768 36437 34421 39056 35776 39137 37185 39424 38704 40145 40803 39800 43498 38849 41328 34240 40087 34061 35306 32475 37059 33112 35272 39112 34680 40328 35532 40257 40997 36000 34965 40976 40644 36106 40322 37764 36591 36699 38496 35584 33088 38824 34699 40416 39480 35659 40640 34496 36769 35933 38431 37514 39632 36656 39447 34896 36448 32581 32743 33794 32859 33027 36904 38364 37814 38268 37142 37110 35634 32633 34395 41040 32999 36257 38691 35831 41168 32954 36150 35136 33045 40540 37600 42337 37633 38772 37697 37596 36779 41013 34535 32549 37528 36344 41696 42706 41109 34343 34970 39591 36311 42848 39194 37161 38923 37572 36709 32582 36001 40400 34868 33653 37284 34928 33034 41289 33751 35501 34040 36704 39123 34828 33419 41299 40728 42647 42048 38104 37508 33700 36691 40372 36681 34541 43204 33941 40376 42951 36224 40216 36288 41575 38016 36368 38272 37319 36904 41704 35978 41322 37639 35718 41658 33383 39922 32955 34160 40693 34914 34352 39552 37367 38464 35405 38752 40486 33033 41024 35702 35147 41261 34555 41674 37323 40336 37033 33464 37233 41609 44193 40519 41457 42016 40268 39913 34889 42468 38421 36946 35552 41912 41847 41888 38976 38828 42229 40994 33691 40938 42983 33493 37721 39950 40272 38803 40153 36305 33392 42689 35383 37142 37335 34661 38368 36365 39552 33920 35129 32473 34489 41984 35169 36816 38225 40328 38128 39465 36769 37728 35072 33689 34136 40961 34218 42160 35105 34784 37815 36128 40311 34944 41271 36786 39260 33992 40604 42612 38127 33475 38898 33184 40908 34635 41368 35727 37387 41324 34775 33098 35786 38384 38686 40032 38713 34886 36468 35209 40024 41492 40696 33192 37898 37352 35154 42034 35136 37600 35207 32729 33926 37714 34555 34807 35980 40665 42551 41099 38358 34199 37499 39830 40921 37181 36129 40003 38695 35713 36961 33261 34935 39312 39280 37552 41110 35429 35443 41910 36164 40983 35718 41782 42518 38592 37636 34324 36353 38914 38185 41229 36822 34432 39187 34616 37608 42652 35933 40524 35190 41184 36265 36076 41031 38932 40432 34790 34656 40360 35927 33132 40681 36015 38155 33885 36708 42240 34128 42064 40937 39557 40513 39279 42610 34585 40743 35008 35099 37741 35412 37985 36528 33826 37126 39040 38958 40118 40103 42168 34216 34272 38441 39751 34454 36438 36096 34752 41029 38576 33843 32871 36115 34869 41484 41432 42508 35040 37070 41364 33703 37631 37360 33958 42004 40641 41969 34816 37058 42405 37525 35841 37088 36016 36465 36644 35384 35025 37211 35174 37573 38569 38540 33012 37424 34512 39307 43093 35804 42370 39388 35094 33888 38280 42773 39557 40838 40760 42400 35946 36148 35139 37062 34544 38320 34864 32858 39660 41520 39415 41450 40304 36404 34976 37685 36492 33559 41301 41272 36368 33979 35887 35108 35304 33290 39744 40967 38954 35620 34682 34951 38199 33558 41812 33587 35232 37281 39648 40563 40522 36045 35272 36742 39891 41530 40297 35899 34414 35493 40384 40391 40803 34720 34888 34368 40041 41348 37387 43008 39746 40280 37412 36160 35315 42250 41591 41877 37320 35031 34464 33021 39546 40836 36480 36230 36372 41386 41216 42456 37340 37351 39254 42157 42135 34996 34957 32873 37984 34232 33384 42605 42464 43057 38032 36224 40579 40627 35856 33134 40568 34284 35521 37056 39744 40919 35337 42845 42448 34663 33204 33336 38267 37398 36864 41933 36784 32910 42500 41712 36952 36026 38595 35780 42618 41884 40263 37365 44048 34451 39568 39440 34439 43611 42987 39250 38930 41299 36428 41192 38122 36177 40928 38585 39799 43336 38453 37376 33288 42560 36402 37888 40938 34992 41482 37120 37385 34784 41696 38144 38070 42807 40449 37234 36945 39858 35936 38378 39123 38960 42624 41977 36183 40694 37712 38571 35097 42873 33240 33746 35864 34560 39195 38747 38412 35854 32513 42001 35148 34634 34112 40528 36224 39880 36967 35788 42431 35314 34407 35793 39148 37408 38131 37248 43129 34679 41888 37344 35157 40176 36771 39234 33175 33905 42221 40216 35949 37993 37639 39111 42326 33682 42080 38915 34228 40481 35687 35936 40935 35277 41624 36794 37319 38816 37076 38220 39815 35289 42861 39899 42898 42726 36262 38589 42421 34128 40809 35404 35715 36580 38330 38743 34506 34423 42392 37708 33504 39792 42722 40582 42790 33729 33143 42163 37445 35745 36824 39296 42924 37120 43104 38840 33217 38703 33670 33804 42890 37639 36041 37772 34371 38631 40016 37600 37848 40704 35648 38446 40101 36440 38453 36921 32225 37729 37000 39709 33415 40617 39153 43592 41159 36533 36098 41762 39335 40130 34119 34170 41731 40192 35792 39856 41514 35054 42516 38019 26049 33843 37429 35131 40344 34053 40394 36890 40054 39654 41619 43913 36552 42916 40015 38136 36713 40856 36780 34656 42976 38268 38221 42496 40763 39909 39708 29175 34148 33304 40001 38310 37186 32781 35447 42448 40080 45620 40660 35680 42289 40377 37896 37140 42924 35494 35990 42894 34993 38930 39219 37939 32949 41088 33212 40642 41539 40960 42794 38181 41475 42460 38786 32190 41280 37321 41952 35576 38692 37363 33472 37421 42951 37900 37035 42826 40495 33692 35331 36004 35060 34775 40345 34713 40129 33415 33896 35522 32516 35154 42783 37438 42740 33120 36251 35976 36469 40234 38110 36901 39573 41784 34268 35228 38761 34003 35701 40849 35374 37376 40251 41185 36120 34909 35386 41651 38297 36411 35819 40821 39941 36866 35984 36843 35816 33157 36842 40197 39988 34840 35417 35065 39569 42986 40913 39798 40938 41473 38212 35182 34991 34144 34200 37106 36921 35241 35881 34336 39081 34794 36453 42963 40950 33164 36365 35489 38436 42656 37964 34171 36784 34656 36951 35977 36835 41388 39941 40672 39530 39767 39388 35848 35044 36709 34488 42167 39012 41432 39043 40395 39899 35190 35494 37108 36049 42064 42123 42701 34427 38080 33463 41685 40821 41429 36537 37029 35514 40865 42546 42208 34256 42339 37216 38487 42628 38996 39621 42216 39618 35043 37800 33928 41536 34359 32772 34160 40976 41894 37503 41783 40997 42347 42609 36269 38176 38445 36448 35657 33922 34096 34325 39003 41024 40416 37329 34409 42528 35656 39939 36665 39680 37376 37514 42996 34040 39941 35965 34154 41862 35332 38125 37658 33013 38229 37364 36338 42392 32887 38528 37900 35560 42512 37250 40751 36224 42752 33988 36816 37288 35060 41400 37557 35840 38168 41037 34720 36757 38311 35192 33929 33372 41040 35432 34005 41350 36643 38519 36709 40697 36601 34560 39370 41456 35184 36899 39552 42226 34608 41977 41408 35132 36544 40115 36944 37268 39739 42089 34486 42124 41115 35830 35404 39786 36343 38132 40816 33242 34319 40707 40411 33616 41240 33028 35493 33811 38172 38127 37952 39152 35273 42605 41752 35281 35905 40293 37696 35200 39330 35403 35051 33056 40757 33008 39950 42764 34326 41526 37623 37352 38528 40432 35105 42228 42135 36386 36947 40503 35008 33356 36993 37568 39208 41396 33974 41900 41552 35620 34476 41485 36680 37377 40278 42020 33956 42907 41365 35849 33012 40325 38528 39185 41972 34096 41059 39414 39047 34592 34835 33446 41415 36284 38216 34666 36192 36364 37380 40834 35536 39814 40272 36089 39152 36128 38209 43457 38025 37408 38261 40780 34464 39961 42310 40673 39353 37602 38568 34385 37683 35780 37672 35354 38518 38249 36779 35666 41777 35541 33848 40183 37335 35752 42191 34968 38496 37284 37766 33505 42617 33645 33497 39994 37095 35670 41719 40074 36742 36951 36311 33945 34214 37233 34420 40371 34618 33684 41721 36279 36512 38304 35736 35831 41310 36056 42266 40503 35730 34880 40910 37254 35776 38178 36569 36227 40403 35973 42390 41384 35680 36776 36420 33863 40974 38734 40544 35061 36929 41509 39424 34802 45272 38347 41382 39397 33732 30312 31536 38704 37959 40457 36789 34177 40594 39622 33132 41316 39341 43624 38748 40389 39844 35260 34808 34561 32028 33498 37365 41371 34213 40245 45104 36717 42560 38673 41784 43443 34743 37266 33796 38824 40352 33815 41416 42021 36333 42765 39928 33580 33474 36018 38144 41299 38353 40625 40968 37552 33104 33216 38112 34352 36055 40394 42474 37165 33436 43160 35684 40294 42215 36717 42317 38423 41857 36855 37749 41056 35034 42795 36607 43360 37664 42593 39709 37917 39936 39968 37705 40712 38370 39296 37377 41050 40484 35128 33133 36368 38693 35687 38079 39204 35057 34176 37176 41320 34539 41273 39946 33913 36704 36960 39771 38563 40583 39616 41220 39552 40069 37737 36672 42202 36230 35863 37045 40713 39136 35890 38711 35813 34265 37220 35433 34477 38992 33280 38314 37472 42650 36557 40006 41124 33416 35460 38311 36708 37299 40471 34361 41270 34440 41192 35769 42247 35862 33938 36929 37735 39277 41714 33840 33737 40106 35121 33391 41794 39000 33510 34946 42456 40585 40103 37128 35536 33424 42548 40534 
22829 22880 22752 22431 22668 22831 22940 22548 22934 22180 23435 22272 23183 22217 23233 22215 22922 22256 23241 22409 22805 22820 22596 22428 23376 22219 22870 22757 22796 22406 23287 22475 22738 22751 23101 22033 23000 22668 23013 22191 22607 22912 23061 22520 22632 22319 22832 22421 23125 22579 23239 22718 23142 22777 23088 22646 23181 22681 23194 22748 23212 22502 23171 22369 22698 22298 22571 22381 22997 22955 22690 22405 22074 22736 23766 22359 22164 22314 23291 23015 22133 22809 23563 21924 23146 22935 21989 23102 22552 22172 22955 21911 23377 22359 22164 23618 22410 22982 22866 22471 22553 21942 23706 21913 23137 21756 23697 21978 23012 21795 23609 22042 22390 22701 22537 23076 22444 22994 22217 23143 22586 22511 22693 22441 22660 22956 22384 22745 22567 22537 22956 22576 22605 22836 22423 22774 22974 22577 22380 22987 22133 22996 22741 22453 22348 22880 22108 23129 22738 22596 22220 22985 22876 23258 22936 23109 22695 23333 22261 22785 22476 23195 22724 23404 22490 23164 22481 23019 22391 22697 22380 22948 22923 23040 22959 22929 22441 22791 22323 22639 22593 23200 22766 48 12791 14523 14571 14877 14739 15671 15504 16103 16388 29373 26539 24962 24380 23968 23101 23233 23191 23829 23921 24004 23921 24535 23353 24084 22857 23049 22599 22391 22398 22568 22812 23305 23459 23697 23994 23328 23944 22871 22732 22723 22406 22609 23016 23117 23366 23226 23261 23146 23180 23161 22925 22962 23046 22604 22766 22716 23045 22962 23342 22935 23431 22659 23153 22748 22869 22625 22673 22509 23130 22823 23222 23004 23109 23010 23051 22920 23006 22561 23104 22307 22764 22326 22725 22425 23049 22743 23368 22695 23436 22519 23412 22562 23221 23004 23184 22162 22978 22627 22720 22311 22845 22393 23033 22652 23224 22756 23259 22848 23104 22850 23046 22936 23168 22919 23156 22988 22905 22992 23063 22839 22965 22546 22925 22798 23028 22606 22916 22471 22804 22355 22791 22410 23015 22503 22414 22609 22828 22784 22889 22912 23074 22992 23171 22783 22885 22295 22615 22537 23328 22741 22704 22309 22789 23088 22979 22101 22760 22802 23137 21935 22656 23549 22731 21999 22837 22729 23327 21894 22375 23621 23270 22029 22186 22706 23456 21841 22507 22833 22198 22994 22272 23094 23145 22250 23833 21836 22949 21941 23764 22016 22853 14966 15941 17174 16742 17224 17438 17591 17393 17557 17994 26350 24903 24512 23918 23641 23222 23277 22952 23239 22890 23252 23086 23545 23129 23302 22791 23065 23175 23156 22520 23050 22939 23405 23149 23411 22888 23193 22539 22861 22562 23141 22960 23232 22681 22922 22523 22836 22646 23477 22969 23226 22384 22888 22726 23256 22517 22924 22341 23107 22969 23134 22336 22940 22680 23022 22268 22932 22892 23331 22385 22898 22720 22977 22242 23258 22769 22679 22554 22996 22445 22963 22940 22779 22664 22972 22289 23470 22361 23191 22372 22940 22759 22772 22618 22753 22725 22928 22743 23273 22769 22875 22718 22580 22863 22697 22725 22704 22963 22827 22446 23063 22661 23130 22476 23235 22321 22793 22778 22580 22622 23033 22167 23015 22441 22325 22740 22651 22336 23271 22031 22389 22834 22874 21832 22510 23629 22273 22448 23616 23147 22156 22680 23149 22698 21952 22500 23671 22423 22231 23136 23143 23061 21912 22511 23514 23160 22412 22543 22617 23058 22633 23120 22408 22647 22577 22765 22932 22920 22500 22565 22569 23109 22689 23141 22506 22445 22290 22828 22770 22917 22869 22891 22235 22528 22375 23048 22381 23145 22735 23121 22533 9410 17261 18542 18474 18967 19072 19323 19324 19597 19211 26231 23754 23687 22861 23225 22920 23350 22661 23565 22717 23587 22778 23489 22947 23040 22564 22811 22441 22759 22332 22848 22339 23080 22686 23027 22699 22957 22941 23079 22889 23107 22900 23274 22784 23178 22845 23062 22791 23246 22708 23210 22791 23210 22603 23117 22521 23053 22762 23208 22760 23123 22824 23072 22884 23076 22919 22973 22855 22920 22824 22812 22811 22807 22698 22780 22564 22653 22343 22772 22291 22579 22156 22560 22397 22538 22510 22352 22407 22632 22640 22893 22897 23452 23168 23676 23121 23815 22760 23605 22555 23366 22400 22672 22291 22623 22433 22102 22038 21855 21864 22026 22181 22513 22577 23076 22529 22990 23075 23240 23585 23031 23516 22469 22892 22615 22548 22182 22497 22209 22521 22450 22816 22860 22937 22989 22784 22981 22592 22453 22607 22331 22528 22455 22945 22645 23133 22660 23201 22423 22903 22414 22452 22184 22802 22633 23028 22887 22803 22528 22792 22131 22793 22208 22583 22585 23169 22447 23144 22350 22639 22144 22669 22488 23045 22731 22951 22556 22838 22217 22812 22103 22631 22502 23211 22579 23133 22485 22994 22144 22585 22171 22629 18595 20249 20105 20832 20419 20614 20384 20550 20029 31817 23279 23184 22887 23480 22883 23289 22476 22952 22480 22826 22250 23193 22845 23011 22759 22861 22291 22992 22256 22635 22597 23180 22628 23202 22375 22668 22202 22657 22711 23021 22843 22840 22742 23259 22350 22574 22350 23015 22644 23233 22472 22941 22418 22774 22251 22530 22144 22966 23065 22915 23125 22567 21996 22169 22126 22487 22863 23680 22935 23611 22326 22670 22158 21896 22285 23086 23499 23041 23369 22528 22167 22129 21780 22312 22743 23437 22973 23511 21980 22021 21929 22449 22977 23243 23467 22794 22992 22116 22349 22273 22737 22801 22876 22816 22671 22444 22556 22249 22420 22428 22428 22421 22693 22683 23056 22716 23068 22449 22919 22413 22695 22377 22535 22094 22564 22345 22912 22326 22727 22764 22934 22758 23000 22797 22969 22702 23003 22631 22938 22331 22504 22125 22823 22334 23143 22608 22656 22171 22823 22678 22651 22263 23079 22094 22831 22383 22711 22484 22600 22536 22843 22280 22653 22573 22521 22470 22521 22691 22663 22445 22697 22032 23222 22533 22569 22395 22912 22509 22551 22501 23213 22575 22661 22183 22733 22472 23041 22325 22696 22068 22616 18888 21795 21281 21617 21031 21844 21560 22023 21187 21837 22870 22932 22668 23225 22801 23069 22471 22597 22194 22714 22503 22987 22529 22909 22440 22637 21817 22519 22195 22702 22720 23144 22852 23091 22481 22595 22191 22464 22397 22998 22511 22741 22185 22284 22179 23170 23249 23082 22101 22183 22613 23176 22551 22935 21847 22849 23543 22618 21757 23020 22810 22293 22043 23671 22699 21939 22551 22827 22060 22835 23371 21786 23030 22455 21826 23708 22009 22829 22377 22001 23571 22110 22425 22583 21844 23687 21682 23158 22186 22997 22575 22712 22636 22814 22659 22621 22656 22679 22603 22700 22562 22776 22434 22758 22416 22947 22351 22637 22358 22842 22594 22454 22487 22531 22932 22327 23143 22039 22793 22135 22862 22502 22725 22826 22479 22520 22617 22582 22888 22199 23125 22131 22707 22529 22544 22457 22533 22339 22970 22080 23114 22263 22592 22697 22570 22247 23125 22029 22717 22608 22533 22317 22803 22163 22976 22200 22695 22407 22720 22092 22814 22385 22495 22324 22869 22103 22811 22456 22528 22325 23053 22057 22711 22433 22607 22226 23108 22044 22758 22595 22838 22353 23201 22423 22593 22540 22923 22189 22987 22492 22743 22720 22848 22144 23084 22572 22592 22400 22987 22075 22784 22432 22751 22177 22920 22335 22564 22286 23111 22267 22757 22678 22993 22089 22716 22453 22880 22108 22703 22759 22912 22094 22535 22478 22896 22081 22639 22805 22908 22071 22510 22366 23066 22391 22432 22216 22630 22775 22909 22055 22778 22456 22974 22386 22368 22479 22816 23089 22497 21810 22068 22285 23607 22994 22511 21718 22455 23450 23196 22659 22019 22009 23035 22628 23479 22283 22040 21751 22441 23444 22937 22025 21998 21664 23173 22666 23420 22677 22226 21844 22016 23049 22864 23310 22726 21929 21852 22088 22449 22427 23504 23063 22970 22712 22299 22419 22177 22528 22352 23017 22563 23040 22653 22547 22225 22356 22350 22553 22758 22594 22864 22828 22613 22665 22225 22361 22299 22768 22349 23058 22656 22808 22325 22423 22129 22754 22404 22775 22848 22799 22353 22540 22149 22600 22381 23008 22498 23132 22420 22614 21966 22672 22476 22734 22634 22743 22101 22480 22383 22976 22290 23111 22607 22922 22286 22474 22116 22705 22612 22910 22631 22880 22246 22593 22100 22663 22327 22959 22502 22948 22528 22651 22155 22533 22373 22714 22579 22810 22350 22803 22023 22776 22273 23033 22280 22895 22424 22458 22172 23182 22442 22668 22569 22745 22269 22613 22484 22857 22317 23040 22301 22647 22167 22835 22466 22812 22284 22496 22328 22851 7314 13800 13801 14856 14466 14874 14848 15508 15608 15994 27438 25632 24640 24808 24009 24195 23286 23753 23536 23719 23435 23276 22824 23343 23013 23656 23060 14695 15901 16474 17332 17892 17685 17857 17357 18017 17804 26907 25058 24307 23523 23972 24210 23554 22924 24145 23680 22902 22745 23440 23575 22455 22864 24165 17184 18255 19533 19835 18530 19796 19884 19720 18750 30325 25588 23477 23498 24702 23141 23021 24195 23596 22528 23507 23596 22528 23367 23657 22572 22614 23156 20251 19512 20365 21072 20435 20802 20949 20754 20648 25952 23565 23793 23112 23383 23277 23229 23414 22922 22801 23207 22737 23040 22688 23236 22920 23092 19238 21392 21524 21690 21892 21766 21792 21882 22061 21813 23638 23249 22577 23367 22967 22810 22829 23210 22584 22906 22472 23290 22961 23232 22467 22802 22628 23120 22500 22947 22308 23299 22834 22761 22576 23232 22500 22798 22820 23383 22242 23179 22487 22714 22853 23101 22376 23145 22398 23055 22754 22629 22721 22886 22309 23396 22300 23175 22394 22949 22776 22741 22532 22760 22829 22844 22665 22941 22682 22919 22588 22903 22575 22959 22714 22880 22596 23022 22585 22839 22727 22740 22433 22828 22552 23073 22248 23360 22225 22888 22706 22597 22677 22633 22777 22896 22567 23255 22260 22767 22676 22662 22592 22713 22553 23033 22227 22940 22669 22570 22823 23009 22320 23153 22680 22471 22629 23064 22101 22865 22801 22530 22312 22857 22872 22061 22440 23673 22196 22576 23652 22817 21936 23454 23042 22079 22711 23220 22062 22365 22827 22958 21724 22617 23296 22144 22510 23675 22953 22017 22276 22871 23159 22141 22123 23492 23132 22230 21829 22720 23207 22392 22462 22831 22899 22439 22566 22363 23136 22689 22541 22355 22789 22769 22555 22367 22858 22748 22914 22434 22823 22684 22955 22541 22480 22443 23208 22483 22439 22393 22826 22806 22624 22282 22954 22510 22976 22376 22812 22677 22931 22248 22559 22371 23265 22596 22608 22226 22735 22808 22855 22212 22839 22592 22949 22099 22849 22688 23137 22382 22592 22160 23170 22550 22956 22108 22145 22667 22929 22501 22601 21736 23155 22641 22875 22042 22637 22572 22951 22646 22857 22117 22816 22332 23175 22397 22509 22190 22802 22804 22982 22328 22616 22311 22976 22508 23058 22224 22535 22509 22992 22638 22887 22088 22663 22330 23219 22441 22520 22164 22828 22767 22965 22432 22545 22240 22912 22482 23117 22566 22565 22151 22882 22692 22953 22182 22472 22393 23092 22657 22870 22113 22501 22749 22967 22609 22420 22740 23110 22734 22836 22032 22294 22750 22878 23160 22754 21851 22179 22629 23605 22616 21994 21880 22438 23389 23174 22614 22044 21952 22649 22599 23511 22544 22016 21832 22402 23442 23148 22848 22117 21985 22451 22393 23453 22498 21972 21913 22418 23368 22681 22833 22262 22499 22339 22640 22824 22873 22324 22376 22281 22976 22690 22795 22427 22449 22444 22549 22948 22882 22481 22421 22329 22976 22528 23045 22480 22648 22565 22684 22866 22775 22157 22588 22296 23076 22582 22913 22320 22617 22401 22660 22643 22937 22135 22474 22096 23052 22487 23101 22359 22546 22258 22701 22743 23080 22196 22574 22229 12617 13248 14716 14441 14948 14676 15687 15408 15845 33114 26978 24740 24624 23867 24521 14766 17131 16861 17832 17632 18222 18148 18525 17868 18301 26229 25447 24371 24840 23859 14184 18300 19313 19584 19998 19366 19717 19319 20249 19675 26789 24518 24193 23956 24128 23632 20264 20279 21184 20748 21441 20843 20928 20749 21200 26420 24148 23408 24007 23393 23717 21112 21989 22080 22344 22032 21997 21742 22556 22022 22021 23212 23393 23584 23479 22578 22807 22903 24071 23105 22747 23754 23602 22135 23270 23429 22504 22910 23501 22626 23969 22020 23440 22685 22845 23715 22193 23405 22501 22849 23705 21976 23488 22455 22287 23815 22730 22315 23375 22586 22232 23219 23778 22420 22281 22987 23085 22962 22681 22860 22963 23031 22620 22721 22608 22786 22949 22808 22653 23040 22628 22662 23068 23122 22401 23052 22475 23163 22354 22955 22324 23236 22391 22803 22998 22915 22582 23274 22495 22675 22553 23096 22936 22923 22397 22642 22263 22697 22350 22600 22241 22832 22500 22835 22856 23157 22717 22941 22166 22961 22388 23261 22233 22882 22830 22945 22432 23287 22624 22840 22745 22936 22393 23255 22485 
22500 21777 23797 21316 22889 21927 22433 23147 21319 22825 21846 23115 21797 22803 21681 23529 21428 22617 21504 23552 22433 22418 22822 22539 22101 22963 22176 22541 22633 22818 21730 22831 22538 21985 22455 22637 22195 22115 22301 22908 22469 22091 21963 22311 22688 22908 22423 22628 22000 22383 21778 22112 21888 22282 21930 22377 22072 22264 21760 22339 21674 22406 21909 22615 22499 22919 22587 23021 21683 22268 22144 23123 22113 22551 21536 22823 22497 22588 21529 22839 22030 22482 21975 22716 21542 22861 21904 22363 22370 22560 21777 23105 21632 22828 22331 22403 22080 22368 22405 22701 22061 22869 21876 22639 21646 23128 21589 22503 21802 22993 21977 21911 22225 22423 22486 22208 22199 22435 22260 22871 21776 22804 21641 22975 22132 22433 21905 22794 21815 23109 21656 22698 22288 22381 22094 23156 21696 22544 22207 22249 22251 23008 21639 22516 22103 22336 22343 22880 21776 22448 22192 22300 22442 22658 21911 22780 22072 22261 22562 22403 22017 22711 22024 22298 22992 22274 21554 22592 22186 21561 23163 22954 21155 22079 22584 21521 21991 23831 22453 21415 21970 22634 22699 21639 20992 22551 6752 7790 9695 10181 11674 11910 13343 40784 36620 31954 30711 28425 27447 25837 25901 24557 25410 24132 24869 24241 24396 23960 23980 23305 23823 22847 23424 22481 23204 22491 23449 22748 23597 22855 23649 22500 23430 22825 23017 22440 22708 22382 23211 22594 23242 22637 23254 22665 23054 22555 22999 22049 22699 21841 22437 22296 23013 22477 23264 22433 23205 22115 22856 21586 22546 21856 22421 21890 22779 22373 23019 22636 22899 22464 22708 22441 22608 22119 22272 22000 22090 21467 21757 21537 22375 22464 23506 22835 23800 22503 23657 22255 23785 22144 23128 21898 22225 21579 21368 21288 21457 21466 22060 22148 22677 22757 22976 23344 23075 22919 22823 23001 22766 22794 22522 22949 22338 22968 22245 22887 22197 23010 22326 22763 22212 22624 22209 22665 22021 22617 22096 22581 22061 23025 22143 23004 22263 23042 22386 22659 22074 22362 21833 22483 21993 22616 22272 22439 21795 22677 22148 22829 21661 22665 22319 22827 21639 22475 22140 22835 21699 22535 22294 22922 21774 22393 21815 23101 21927 22272 22170 22752 21828 22235 21952 22368 22253 22835 21673 23185 21794 22600 22088 22560 22173 22398 22188 22797 21943 2803 6487 10359 11702 13084 13290 15284 14980 16119 40000 35427 31285 29828 27688 27328 25966 25702 24373 24565 23824 23965 23129 23537 23019 23754 23224 23627 22881 23309 22654 23163 22454 22814 22529 23406 22989 23597 23040 23349 22268 22464 21927 22528 22757 23136 22322 22605 21580 21874 22586 23876 23299 22650 21328 22153 22874 22626 21841 21780 22030 23765 23287 21637 22149 23105 22185 21918 21489 23609 23378 21784 21893 22928 21940 21573 23307 22718 22116 22345 22532 21909 22792 22528 22198 22311 22471 22304 22740 22065 22722 22012 22931 22088 22656 22144 22103 22692 22455 22275 22148 22515 22348 22063 22218 22405 22553 21744 23021 21917 22712 21751 23110 21828 22464 22305 22286 22105 22352 22104 22699 21638 22725 22265 22338 22215 22853 21572 23114 22052 22367 22028 22874 21505 22604 21994 22715 21541 22535 22483 22784 21944 23065 22240 22357 21943 22877 22052 22407 21360 23168 22232 22514 21607 22528 22454 22645 21511 22368 21900 23105 22256 22542 21464 22629 22263 22833 22049 22574 21680 22856 21972 23086 22181 22476 21681 22566 22055 22573 22507 22829 22247 22223 21746 22498 21896 23056 22288 22952 22176 22470 21642 4701 9644 13118 14494 15853 16544 17293 17131 17655 17027 33190 28951 27474 26013 25667 24295 25524 23895 25296 24016 24480 23464 23417 22519 22247 21655 22176 21708 22222 22096 22313 22893 22649 23565 23021 23808 23113 23602 23272 23651 22845 22343 22475 22191 22139 22470 22214 22667 22284 22647 22247 22483 22358 22327 22000 22149 22291 22431 22325 22669 22454 22617 22507 23006 22352 22954 22375 23101 22248 23029 22236 23046 22165 23041 22126 22897 22115 22712 22208 22724 22042 22343 21799 22319 21634 22253 21728 22118 21681 22572 21833 22522 22060 22809 22144 22980 22343 22883 22343 22805 22457 22528 22313 22633 22281 22529 21911 22660 21752 22455 21611 22278 21452 22386 21847 22344 21865 22702 21989 22930 22239 23177 22018 22860 21877 22547 21756 22299 21721 22448 21601 22588 21781 22765 22290 22920 22336 22690 22007 22976 21727 22272 21723 22317 21988 22633 22260 23081 22113 23002 22032 22288 21778 22280 21785 22710 22475 22659 22401 22518 22064 22553 21685 22046 21883 22510 22279 23483 22016 22726 21708 21420 21230 22328 22786 23138 23376 22238 22421 22173 21272 21580 21320 22343 22689 23618 22599 23456 21829 22108 21881 21592 11897 14737 16145 18190 19080 19193 20051 19143 19116 31051 27200 25296 24789 24313 24277 23970 23618 23168 23340 22502 22775 22593 23164 22849 23312 22553 22813 22343 22536 22092 22506 22440 22871 22973 22600 22370 22435 21824 22471 22268 22841 22523 22978 22161 22756 21943 22253 22007 22759 22549 22717 22435 22633 22329 22618 21678 22282 22040 22875 22208 23159 21970 22583 21730 22339 21571 22618 22307 22855 22496 22744 22121 22597 21596 22276 22053 22839 22195 23086 22122 22645 21792 22224 21586 22664 22094 23011 22407 22539 21828 22531 21644 22625 22190 22870 22228 23072 21744 22471 21829 22270 21985 22848 22511 22722 22128 22648 21750 22597 21651 22321 21710 22252 21869 22701 22280 22978 22173 22951 21996 22825 21294 22397 21712 22227 21672 22440 21640 22289 21970 22647 22192 22754 22208 22867 22147 22550 21823 22432 21656 22344 21981 23030 22198 22758 21963 21966 22657 22919 21470 21790 22373 21656 22393 23040 21195 23490 22199 21977 23264 21472 22661 21619 23507 21943 22345 22521 21637 23443 21072 22876 22096 21532 23265 22869 21019 22658 22477 21656 21298 22142 23104 23571 22488 21564 21158 22028 22727 22192 22311 21986 16277 18351 19903 20028 20228 19819 20494 20579 21131 20792 25766 24264 23604 22986 23329 23192 23416 22929 22999 22219 22439 22072 22793 22067 22921 22488 22640 22295 22596 21811 22170 22160 22508 22467 23223 22559 22948 22127 22247 21718 22578 22247 22703 21941 22319 21763 22749 22528 23159 21792 22387 21960 22865 22185 22523 21549 22885 22239 22583 21725 22788 22033 22501 21957 23091 22330 22329 22113 22583 21517 23076 21877 22484 22033 22708 22104 23040 21728 22809 21698 22756 22432 22272 22252 22449 22356 22671 21932 22311 21954 22919 21944 22389 21818 23089 21707 22603 21672 23220 21685 22649 21727 23031 21849 22550 22012 22733 22045 22541 22333 22279 22189 22429 22412 22448 21895 22535 21998 22863 21787 23063 21818 22491 21850 22864 22217 22281 22535 22336 21893 22703 21755 22619 21841 22756 22183 22400 22512 22549 21952 22835 21542 22490 22206 21891 22447 21941 21779 22983 21301 22394 22720 21434 23203 22795 21201 23456 22487 21447 22929 23089 21132 22742 22832 21534 22585 23025 21199 22764 22679 21626 22046 22906 21192 22536 22786 21906 21589 22446 22516 21261 21970 23241 21334 22068 23415 21602 21827 23287 22018 22031 22955 21660 22341 22543 22120 22128 22838 22093 22098 22583 22586 21765 22811 22359 21953 22248 22514 22168 22063 21991 22825 22127 22408 22577 22680 21816 22345 22087 22775 21751 22392 22225 22621 21668 22354 22035 22872 21873 22371 22247 22718 22049 22211 22025 22697 22112 22889 21717 22421 22478 22814 22061 22180 21751 22862 22202 22702 21560 22302 22148 22605 22230 22749 21530 22358 21904 23136 21975 22393 21607 22539 22360 22761 22008 22292 21771 22549 22066 22948 21755 22190 21959 22489 22420 22841 22048 22478 21478 22390 21719 23203 22037 22712 21672 22162 21660 22259 22263 22775 22301 22817 22001 22329 21745 22144 21866 22815 22071 23091 22183 22837 21824 22199 21468 22618 21991 22573 22334 22851 22212 22542 21727 22241 21733 22433 21952 22907 22272 22800 21976 22295 21755 22288 21923 22416 22561 22732 22182 22491 21597 22196 21756 22745 22085 22957 22229 22535 21862 22227 21808 22400 22465 22853 21857 22114 21587 22365 22023 23531 22359 23161 21997 21685 21153 21697 22657 22572 23335 22883 22040 21719 21024 21414 22152 23223 22237 23755 22567 22405 21389 21376 21556 22391 23182 22403 22513 21823 21709 22567 22238 23351 21991 22949 21849 21940 21872 22204 22690 22343 23033 22246 22138 21936 22464 22669 22218 22381 22475 22061 22307 21899 22555 21975 22627 22027 22109 22069 22170 22626 106 1917 5969 7886 9719 10853 12347 12638 13785 13512 39616 34528 31951 29925 28689 26519 26192 25440 25784 24779 24449 23779 24105 24109 24127 23580 23445 2784 8523 10856 13988 14239 15537 15440 16571 16658 43191 36112 32397 29037 28160 26678 26524 24736 25540 24683 24812 23325 24533 23717 23808 23008 23908 23277 9432 12476 15712 15930 17339 17867 18800 18017 19220 36528 32056 28425 27560 26096 25415 24417 25263 23625 24094 23912 24149 22985 24140 23138 23164 23175 11188 14063 16825 17684 19041 18711 20056 19298 20394 20103 30930 27894 26707 24853 25415 23803 24193 23436 23726 23232 23357 22990 23818 22505 23889 22436 23237 16854 19104 19787 20317 20855 21120 20771 21435 20971 21924 25611 25429 23874 23677 23808 23691 22615 23472 22971 23027 22599 22763 22679 23464 22964 23130 22118 22812 22752 22965 22241 21735 23255 23549 21670 22578 22801 22166 21544 23425 23077 21584 23095 22227 21573 24082 21849 22480 22360 21753 23486 23328 21367 23145 21900 22449 23528 21568 22653 21863 23412 22003 22738 22203 21552 23751 21646 22747 21376 23600 22040 22426 22144 22726 22416 22254 22285 22773 22521 22311 22512 22386 22784 22193 22999 22097 22404 22528 22362 22505 22280 22423 22604 21922 22925 21894 22597 22247 22558 22298 22432 22505 22707 21975 23003 22187 22446 22661 22684 22192 23171 21916 22953 22555 22465 21884 23005 22029 22444 22437 22859 21607 22892 22264 22432 21829 22732 22133 22386 21891 22968 21635 22962 22499 22587 21877 23045 22087 22374 22272 22816 21763 22712 22199 22742 21606 22533 22347 22482 21725 23142 22127 22634 21605 22569 22489 22765 21587 22608 22228 22612 21742 22595 22503 22642 21472 22656 22032 23185 21761 22447 22362 22936 21766 22404 21941 23262 22231 22416 21691 22513 22555 22657 21679 22697 22103 22914 21803 22278 22512 22793 22028 22173 22528 23002 22242 22368 21660 22499 22551 22760 21725 22541 22022 23073 21900 22411 22440 22581 22290 21800 21825 23591 22208 21524 21715 22351 23240 22477 21127 22051 22019 23563 21984 21456 21720 22324 23415 22555 21257 22091 22043 23509 21930 21365 21614 22097 23454 22937 21802 21373 21817 23547 22617 21997 21121 22068 22928 22786 23111 21980 21804 21969 22282 22706 22768 21801 22186 21894 22919 22512 22262 21926 22401 22539 22544 22520 22340 21956 22476 22116 22810 22046 22135 21879 22381 22558 22672 22215 22233 21712 22472 22035 22919 22055 22194 21832 22519 22599 22677 21691 22512 21953 23107 22164 22260 21861 22413 22465 22744 21727 22176 21899 22988 22137 22647 21587 22309 22095 22961 21937 22461 21728 22711 21949 23040 22122 22249 21632 22455 22370 22810 22075 22298 21777 22798 21894 23091 22061 22417 21522 22763 22130 22854 21984 22412 21624 22607 22020 23114 22144 22231 21669 22549 22211 22832 22092 22528 21569 22529 21752 23040 22180 22423 21446 22396 22224 22625 22456 22538 21605 22331 21878 23107 22235 22482 21661 22422 22542 22791 22016 22237 21722 22742 21984 22981 22027 22388 21584 22520 22295 22713 22376 22400 21688 22414 22107 23464 22322 21832 21176 22052 22778 22898 22795 22179 21180 21863 21800 778 4584 7354 8484 10064 11515 12643 14523 14565 42488 36352 32520 31322 28903 28480 5998 10117 12094 14597 17048 17381 17362 16977 16791 41768 35996 34016 30689 28464 27087 8839 13953 15739 17915 18093 18552 18781 19449 19986 20272 34691 30664 28443 27862 26471 13301 15865 18297 19523 20235 19954 20481 20263 21466 20886 32093 27983 27167 26160 25697 24307 19402 20355 21696 21362 21646 21137 21963 21943 22007 27413 26371 24697 25240 23752 23963 23508 23920 23430 23623 22757 24059 22837 23328 23224 23423 22370 23777 22464 23079 22765 23351 22604 23233 22200 23582 22412 23010 22540 22561 22858 23093 22241 23203 21988 23049 22695 22786 22224 23287 22208 22648 22560 23425 22081 22542 22184 23000 22534 23047 22460 22892 22200 23014 22156 22937 22311 23175 22268 22802 21993 23189 22361 22608 22301 22479 22469 22857 22224 22628 22771 22426 22470 22947 21792 22871 22385 22352 22391 23204 22259 22205 21972 23042 22577 22733 22567 22664 22508 22760 22686 22960 22400 22505 21527 21932 22082 23383 22548 23049 21313 22152 23483 22611 21399 23419 22711 21433 22522 23161 21424 23054 22743 21525 23197 
