# Supplementary material for: An Active Feature Selection Strategy for DWT in Artificial Taste
Source: Hindawi journal article supplement (doi:10.1155/2018/9709505), 2018-01-01
Supplement: f1 [file 9709505.f1.zip › oolongTea-hi-1.txt]

43174 43488 43480 43485 56 48 5551 14597 17494 19768 20808 20399 20644 21418 22010 22382 21794 22416 22273 23227 22592 22402 22717 22866 22704 22632 22433 23322 22455 22601 22420 23059 22544 22754 22816 23490 22568 22892 22466 23189 22503 22845 22154 23593 22558 22684 22549 23269 22532 22976 22466 23616 22212 23208 22816 23413 22051 23232 22504 23483 22165 23210 22784 23053 22345 23640 22369 22954 22828 23437 22039 23354 22437 23144 22266 23163 22685 22997 22551 23372 22184 23176 22885 23214 22359 23639 22486 22927 22695 23366 22060 23303 22616 22983 22599 23289 22497 23010 22549 23384 22248 22983 22940 23001 22560 23496 22384 23321 23016 23116 22465 23648 22573 22583 23374 23175 21868 23584 22952 22242 23532 23402 21778 23482 23055 22136 23074 23427 21879 23009 23076 22252 22872 23308 22218 22519 22887 22951 22018 22896 23168 22007 22574 23428 22857 22630 23582 22734 22809 23031 23269 22260 23270 22972 22658 22690 23133 22515 23004 22726 22747 22606 23280 22304 23042 22574 23152 22241 23101 22956 22920 22407 23592 22352 23121 22943 23388 22417 23683 22633 23012 22800 23474 22175 50 13429 17119 17536 19337 18926 19753 19373 20628 19630 31444 26015 24859 23724 24656 23075 23754 23445 23456 22763 23940 22755 23445 23256 23596 22624 23697 22733 22979 22731 23484 22310 23754 22741 22888 22701 23484 22316 23396 22791 23005 22583 23342 22578 22998 22714 23315 22679 23304 22391 23118 22777 22901 22697 23264 22159 23241 22898 22629 23049 23392 21821 23589 23016 22264 23277 23391 21884 23766 23043 22145 23625 22932 22400 23976 22366 22769 23177 22022 22590 23108 22197 23152 22483 22845 23205 22044 23127 22884 22733 22892 23337 22230 23425 22859 22711 23095 23125 22413 23409 22855 22792 23050 23143 22536 23588 22488 22958 22999 22792 22541 23480 22248 23029 22849 22874 22467 23504 22252 23132 22955 22938 22441 23607 22340 23441 22665 22917 22319 23494 22095 23196 22749 22980 22368 23567 22258 22519 22822 23017 22376 23638 22161 23232 22865 23049 22430 23696 22391 23097 22984 23086 22288 23631 22333 23021 22800 23290 22074 23621 22574 22885 22773 23265 22200 23288 22666 22832 22528 23206 22480 22992 22647 23275 22377 23148 22704 22841 22569 23450 22383 22433 23160 22896 22473 23897 22689 22279 23405 23417 21793 23176 16213 19749 20804 21563 21362 20815 21337 22662 20848 34421 26116 24023 23081 24658 23272 22536 23974 23220 22268 23548 23459 22368 23144 22816 23356 22372 23079 23184 22870 23168 23636 22821 22704 23067 23070 22512 23474 22708 22801 22955 23325 22233 23642 22832 22886 22552 23202 22224 23372 22632 22870 22349 23218 22546 22953 22405 23544 22313 23066 22931 23234 22264 23665 22560 22953 22637 23451 22124 23208 22570 23068 22185 23060 22746 22972 22460 23706 22417 22988 22727 23414 22240 23037 22462 23291 22193 23085 22804 22921 22280 23586 22254 23088 22792 23348 22161 23616 22593 22830 22504 23208 22503 22811 22536 23123 22320 22984 22810 22729 21809 23497 22615 22711 22885 23207 22165 23204 22792 22581 22528 23152 21888 22887 23015 22417 22453 23225 22643 22103 22608 23256 21774 22707 23364 22120 22377 23751 21863 23154 23680 22460 22355 23895 22689 21978 23494 23159 21970 23428 23109 22400 22959 22613 23064 22295 22959 23000 22628 22669 23337 22440 22945 23044 22907 22536 23447 22759 22643 22485 23185 22380 22821 22534 23249 22167 23032 22951 23006 22214 23493 22582 22769 22578 23291 22193 22928 22489 23271 22097 23127 22688 17001 20411 22150 20894 22513 21856 22208 21403 22733 21852 25096 23808 23890 22461 23659 22713 23245 22740 23536 22337 23232 22615 23013 22457 23328 22599 22855 22386 23524 22304 23264 22743 22898 22416 23555 22201 22825 22892 23130 22233 23447 22760 22805 22928 23176 22193 23160 22734 22992 22311 23072 22880 22710 22495 23584 22209 22980 23032 22807 22390 23516 22453 22695 23486 22871 22185 23747 22840 22025 23109 23260 21859 23552 23150 22057 23090 23271 21920 23098 23061 22083 22728 23300 22041 22744 23103 22285 22478 23255 22209 22556 22836 22776 22106 22671 23027 22385 23104 22511 22936 22605 23069 22331 22801 22848 22691 22606 23147 22337 22971 22908 22727 22550 23143 22268 23000 22488 22849 22531 23154 22233 23113 22314 22912 22365 22902 22340 23226 22446 23032 22502 22944 22324 23180 22381 23047 22499 23109 22336 23285 22119 23161 22544 22887 22610 23335 22231 23600 22474 22810 22889 23185 22175 23606 22368 23040 22929 23028 22216 23397 22085 23062 22641 22951 22592 22921 22429 23158 22065 23196 22556 22826 22808 23309 22276 23733 22280 22940 22856 22807 22367 23514 22265 22940 22753 22763 22440 23433 22141 22972 22824 22675 20925 22400 21529 22326 22073 22218 21976 22672 21732 26525 23126 23137 23016 22520 23111 23381 22039 23588 22952 22170 23099 23373 21853 23535 23181 22031 23347 23393 21890 24001 22803 22209 23741 22752 22300 23949 22296 22460 23679 22000 22583 23209 21905 22826 22546 22656 23170 22279 23482 22665 23063 23048 22807 22809 23395 22362 22914 22971 22829 22772 22745 22460 23172 22273 23156 22646 22724 22840 23191 22077 23377 22631 22912 22896 22906 22431 23368 22188 23154 22390 23008 22567 22935 22464 23205 22171 23360 22585 22834 22816 23288 22412 23558 22157 23122 22609 22984 22400 23047 22439 23296 22101 23440 22690 22652 22725 23224 22137 23571 22235 23132 22817 22935 22232 23397 22096 23208 22211 23255 22593 22860 22884 22843 22386 23389 22194 23212 22263 23056 22571 22813 22407 23372 22024 23473 22354 22889 22885 22919 22442 23367 22180 23019 22551 22788 22549 22775 22420 23059 22070 23360 22493 22812 22988 22872 22395 23354 22225 22984 22479 22796 22646 22371 22880 23208 21859 23992 22080 22606 23225 22087 22741 22321 22480 23216 21806 23735 22761 22481 23384 21991 22716 22724 22306 23097 21945 23269 23048 22010 23671 22967 20884 23072 21552 22268 22311 22040 22744 22147 22859 22461 23200 23171 23150 22608 23511 22538 22797 22999 22673 22749 22805 22648 23188 22386 23418 22433 22890 23005 22806 22447 22975 22483 23248 22137 23393 22592 22922 23030 22870 22406 23486 22219 23232 22093 23434 22564 22935 22932 23014 22396 23481 22000 23196 22369 23204 22496 22868 22629 23330 21992 23700 22370 22967 22761 22800 22353 23236 22213 23211 22281 23138 22403 23088 22774 23052 22217 23362 22080 23221 22121 23321 22619 22839 22845 22738 22327 23130 22186 23250 22028 23427 22385 23056 22855 23002 22296 23512 22129 23121 22360 23253 22597 22793 22954 22814 22457 23254 22181 22973 22336 23053 22624 22598 22953 22818 22347 23274 22209 22917 22290 23062 22710 22619 23160 22960 22497 23217 22176 23175 21861 23383 22762 22132 23704 22209 22247 23360 21953 23008 22029 23205 22989 22588 23707 22269 22331 23168 21974 23075 22071 23456 22957 22093 23683 22359 22487 23137 21986 23191 21821 23418 22884 22711 23289 22279 23136 22248 23242 22800 22736 23085 22759 22560 23184 22364 22962 22520 22980 22743 22888 22988 22765 22439 23001 22321 23203 22168 23465 22356 22933 22853 22835 22616 22681 22868 23034 22694 23375 22160 23050 22319 23174 22608 22697 22767 23177 22396 23556 22129 23198 22074 23296 22528 23002 22761 22935 22279 23274 22140 23220 22033 23475 22503 23063 22821 22914 22265 23371 22096 23328 22016 23515 22349 23028 22649 22902 22410 22811 22784 23020 22187 23364 22089 23240 22233 23332 22520 23057 22780 23003 22258 23180 22337 23438 22144 23412 22532 22869 22849 22928 22455 23144 22494 23259 22102 23385 22429 22360 22876 22744 22419 23204 22339 23143 22192 23283 22669 22823 23040 22880 22169 23659 22064 23152 21862 23393 22848 22243 23584 22740 22465 23830 21669 22755 22694 22648 23137 21952 23646 22566 22708 23172 22140 23212 22064 23991 21812 22884 21856 23811 22656 22427 23412 21928 22663 22575 23098 22806 22773 23044 22832 22423 23268 22455 23001 22326 22937 22841 22577 23014 23040 22535 23468 22225 22918 22544 22868 22668 22792 22893 22901 22552 23395 22301 23047 22539 22891 22520 22792 22727 23210 22242 23528 22135 23056 22424 23057 22518 22801 22770 23330 22065 23597 22214 23192 22612 22951 22452 22779 22619 23205 22196 23516 22281 23314 22752 22852 22360 22948 22482 23296 21974 23511 22528 23109 22727 22773 22348 22987 22644 23172 22025 23429 22412 23063 22695 23067 22520 22960 22549 23371 22119 23644 22221 22982 22584 22620 22519 22753 22786 11985 17666 20251 19576 20439 20466 20540 20442 20960 43452 26744 23674 24464 23277 23397 23536 22968 22912 22977 23034 23538 22008 24058 22649 22752 23793 22128 18777 20708 20839 21767 20521 22693 21157 21433 22523 35124 24553 23616 23963 23458 22779 24208 22221 23254 22631 22971 23328 22308 23596 22832 23054 22881 143 20672 21398 21936 22168 21716 22619 21528 22340 21794 27261 23737 23581 23197 23393 23117 22953 23268 23135 22656 23400 22470 23392 22331 23702 22449 23109 17456 21762 21864 22263 21980 22743 21952 23105 21716 22674 24008 23878 22845 23319 23008 23088 22529 23248 22576 23399 22231 23712 22345 23165 22743 23067 22558 21446 22318 22917 21945 23339 21724 22952 22045 23020 22310 23340 23024 23045 22528 23361 22417 23436 22140 23590 22350 23143 22536 23149 22537 22839 22907 22803 22347 23046 22624 23313 22456 23571 22276 23055 22605 23222 22706 22881 23026 22850 22473 23050 22489 23206 22112 23593 22389 23037 22027 23401 22828 22524 23637 22155 22494 22933 22628 23335 21871 23937 21880 22715 22680 22455 23031 22021 23703 22443 22439 23251 22131 23123 22018 23479 22741 22499 23814 22233 23084 22018 23408 22509 22961 22885 22891 22707 22621 23028 23049 22740 23275 22395 23013 22463 23341 22668 22909 22912 22700 22553 22856 22848 23145 22364 23481 22209 23148 22282 23175 22715 22923 22886 22920 22369 23191 22448 23258 22038 23601 22310 23083 22528 23073 22569 22888 22803 23119 22214 23528 22060 23157 22167 23245 22597 22864 22859 22932 22381 23328 22167 23280 22104 23410 22476 23169 22798 22960 22340 23213 22375 23256 22054 23394 22396 22985 22823 22993 22456 22870 22660 23176 22196 23610 22119 23108 22471 22979 22551 22759 22859 23131 22381 23477 22272 22984 22504 23040 22604 22726 22938 22855 22497 22986 22588 23274 22395 23471 22211 23001 22259 22858 22784 22195 23542 22444 22340 23351 21837 23111 21828 23366 22692 22592 23557 22024 22693 22421 22828 23298 21840 23901 22166 22471 23441 22086 22836 22141 22748 23021 22244 23751 21742 22710 22277 22663 23127 22317 23517 22361 22902 22529 23073 22801 22737 23191 22592 22641 22743 22727 23113 22439 23437 22202 23024 22369 23139 22624 22939 22854 22756 22624 22720 22806 23047 22478 23320 22073 23253 22010 23514 22213 23009 22483 23121 22613 22723 22894 22971 22352 23381 22100 23234 22007 23522 22240 23133 22471 22957 22475 22865 22667 23106 22432 23564 22142 23182 22217 23265 22519 22919 22676 22864 22411 22885 22650 23272 22280 23566 22169 23066 22636 23012 22552 22777 22873 22912 22280 23222 22254 23281 21991 23584 22281 22638 22572 22855 22491 22901 22552 23216 22236 23520 22264 22896 22601 22821 22592 22820 22786 23132 22528 23274 22293 23163 22097 23489 22360 22945 22736 22791 22644 22356 23194 22459 22537 22729 22378 23302 21984 24033 21883 22645 22461 22680 23031 22276 23572 21959 22539 22539 22757 23350 21922 23961 22039 22569 22978 22428 22997 21954 23696 22416 22531 22507 22637 23119 22064 23643 22649 22509 23160 22317 23086 22136 23277 22384 22831 22664 22612 22761 22509 22948 22917 22712 23364 22254 23000 56 17251 19080 19886 20519 20468 20196 20957 20332 21160 31427 25591 23558 23716 23388 23241 19027 20886 21276 21946 21261 22469 21086 22090 21376 37810 24440 24027 23554 23384 22823 19552 20998 22308 21345 22905 21314 22460 21783 22451 21975 24734 23662 23592 22793 23833 16112 22328 21365 23114 21852 22708 22130 22673 22157 22539 24648 23656 22769 23129 23002 23552 21748 23416 21885 22934 22232 22873 22403 22780 22584 25003 22690 23698 22613 23402 22352 23673 22393 23232 22649 23078 22864 22871 23045 22819 22448 23073 22717 23212 22470 23430 22293 23191 22231 23526 22255 22963 22544 22896 22778 22376 23416 22658 22676 22651 22780 23279 22121 24039 21998 22588 22695 22551 22967 22272 23755 21988 22652 22477 23018 23000 22410 23817 21786 22988 21948 23852 22528 22589 22776 22690 23112 22402 23069 22400 23161 22267 23488 22358 22986 22429 23284 22661 23072 22909 22716 22836 22571 23194 22662 22608 22560 23068 22842 22465 23004 22492 23239 22361 23447 22169 23219 22240 23381 22373 23094 22196 23437 22315 22988 22338 23382 22487 23546 22404 23180 22512 23143 22679 22964 22595 22791 22877 22944 
21735 20914 21555 21123 20605 21303 22307 22252 20744 20672 21421 21640 20809 20557 21638 22624 21306 20600 21380 21653 21127 20553 20904 22295 22128 20788 20864 21798 21311 20764 20830 22098 21940 20872 21427 21326 21569 20972 20538 21559 21037 21039 20682 21256 21238 21110 20864 21901 21241 20532 21144 21515 21047 20548 21076 22330 20807 20586 22124 21627 20393 21581 21524 21038 20631 21264 21824 20518 21350 22488 20835 20961 22244 21524 20464 21788 21769 20497 21786 21414 21374 21107 21760 21330 21241 21232 21816 21095 21587 21627 21371 21152 22107 21242 21639 21774 21834 21025 22053 21376 21410 21053 21653 21293 21376 21270 21648 21069 21592 21422 21456 21140 21976 21093 21679 21597 21608 21285 22103 20951 21680 21632 21632 21147 22232 21259 21648 21730 21777 21104 22137 21180 21653 21582 21879 20998 22056 21471 21499 21408 21767 21054 21568 21273 21751 21016 21757 21627 21729 20827 22304 21255 21638 21824 21820 21024 22117 21399 21434 21867 21763 21031 22053 21511 21355 21583 21847 21217 21735 21508 21716 21329 21868 21640 21430 21500 21925 21215 21515 21989 21273 21320 22597 21029 124 63 62 521 3084 4449 4818 6944 8275 7816 34313 29208 26589 24248 24129 23408 22192 22554 22403 21525 22136 22439 21077 21333 21940 21491 21263 22214 21087 21741 21736 21445 21144 22105 21346 21495 21945 21697 21294 22120 21463 21411 21719 21875 20939 22112 21607 21513 21669 21707 21027 22128 21249 21616 21820 21664 21141 22192 21262 21657 21807 21835 21299 22227 21224 21977 21798 21733 21291 22177 21103 21745 21654 21513 21351 22023 21340 22071 21062 22140 21567 21496 21553 22023 21112 22169 21256 21532 21847 21661 21429 22248 21137 21774 21642 21609 21366 22150 21046 21713 21655 21500 21324 22016 21127 21716 21476 21491 21388 21505 21461 21792 21264 21614 21520 21447 21372 21752 21190 21565 21575 21368 21375 21885 21152 21349 21862 20919 21700 21970 20773 22016 21892 21012 21393 21965 21134 21148 21847 20954 21607 21982 21166 21212 21628 21484 21060 21568 21824 20675 21656 21597 21485 21367 21983 21133 21613 21889 21424 21397 22101 21297 21583 21751 21618 21256 22173 21388 21431 21741 21821 20979 21932 21454 21399 21445 21905 20982 21846 21440 21629 21108 21789 21527 21568 21329 22273 21131 21774 21789 21763 871 62 3051 8180 10315 12243 11940 13478 13335 14391 43369 32864 26823 24827 23090 23712 22071 22955 22225 22375 21885 22895 21846 21981 21914 22471 21207 22500 21670 22295 21416 22332 21796 22136 21522 22444 21305 22172 22020 21925 21606 22617 21484 22174 22024 22155 21637 22576 21437 22197 22029 22341 21322 22608 21774 21646 21805 22190 21572 21503 21682 22608 20962 21220 22328 21508 21512 23086 21504 21559 22627 22264 20951 22333 22089 21824 21168 21804 22232 21274 21299 23083 21653 21316 22364 22069 21618 21701 22103 21511 21934 21772 21948 21556 21901 22108 21770 21753 22471 21784 21841 22122 22296 21253 22183 21801 21793 21814 22122 21506 21900 21484 22367 21402 21741 22023 22071 21400 22557 21611 21902 22016 22178 21261 22504 21617 21880 21794 22391 21073 22307 21594 21949 21410 22292 21448 22128 21608 22238 21263 22283 21729 22050 21480 22567 21372 22185 21909 22213 21409 22836 21664 22023 21989 22371 21244 22406 21616 22234 21392 22256 21570 21963 21508 22412 21336 22043 21997 22164 21376 22585 21687 21842 21825 22293 21612 22034 21606 22387 21368 22126 21943 22155 21342 22718 21719 21565 22264 22391 20895 22028 22007 346 11936 14825 14557 15717 16377 17154 16093 17636 18012 31297 25065 24752 22281 22187 23145 22444 21573 23116 21888 21556 22822 22192 21109 22489 22135 21475 22123 21800 21775 21871 22138 21630 21928 21883 21853 21596 21965 21997 21784 22064 22495 21545 22323 22046 22150 21510 22560 21856 21718 21760 22220 21474 22022 21527 21927 21483 22233 21586 21990 21480 22275 21312 22093 21851 21928 21475 22536 21392 22238 21922 22131 21606 22624 21435 22060 21910 22265 21450 22635 21603 21997 21911 22312 21309 22711 21547 21928 21787 22300 21209 22418 21676 21822 21802 22306 21289 22546 21617 21959 21825 22336 21251 22349 21616 22036 21575 22470 21217 22152 21656 21991 21645 22293 21184 22336 21793 21710 21831 22355 21157 22412 21760 21737 21980 22278 21415 22487 21777 21849 22134 22225 21132 22720 21844 21303 22469 22016 21075 22925 21771 21477 22711 21509 21495 22993 20946 21789 22376 21159 21441 22503 20983 21876 21911 21341 21712 21969 21527 22295 20998 22394 22081 21177 22599 21856 21719 22125 21957 21541 22533 21515 21923 21976 21649 21782 22064 21593 21949 21680 21819 21845 21856 21651 22144 21399 22000 21729 21815 21700 22122 57 15995 18010 18814 18967 19712 18785 19981 19531 19590 31502 24887 22202 23001 21835 22368 22208 22353 21636 22696 21540 22231 21955 22261 21496 22637 21550 22243 22097 22197 21479 22567 21413 22198 21765 22034 21445 22442 21287 22379 21290 22321 21664 21870 21735 22389 21380 22576 21457 22167 21766 21892 21507 22466 21225 22189 21349 22360 21618 21981 21869 22271 21273 22528 21521 21911 21977 22000 21297 22530 21543 22474 21932 21846 21552 22217 21528 22264 21302 22312 21673 21856 21980 22201 21415 22621 21492 22103 22407 21536 21313 22688 21103 22108 21229 22027 22138 21175 22413 22172 21337 22999 21271 21614 22749 21438 21021 22739 20953 21932 21685 21566 21767 21403 21883 22368 20901 22727 21751 21722 22705 21273 21957 21590 22005 21805 21660 21963 22271 21419 22381 21872 21776 22256 21687 21672 22057 21511 22068 21664 22040 21667 21741 21880 22295 21315 22310 21838 21872 22128 22016 21531 22346 21387 22122 21521 22105 21640 21888 21831 22299 21216 22499 21525 22000 21975 22032 21428 22262 21400 22349 21127 22450 21660 22012 21857 22080 20820 22535 21267 22309 21146 22362 21636 21853 21914 22294 21451 22653 21267 22137 21811 17786 19943 20845 20606 21513 20256 21670 20754 21271 33207 23833 21763 22795 21380 22282 21596 22145 21616 22016 21806 22297 21432 22719 21331 22093 21867 21968 21632 21990 21818 22199 21453 22619 21547 22528 22035 21899 21522 22252 21489 22265 21210 22554 21618 21948 21994 21709 21681 21952 21357 22322 20962 22260 21977 21527 22648 21357 21397 22701 20855 21813 21873 21392 21917 21265 21965 22248 20873 22739 21687 21558 22320 21264 21643 21886 21824 22321 20958 22816 21493 21635 22595 21405 21902 21648 22005 21832 21708 22085 21895 22100 22287 21475 21922 21776 21965 21864 21734 21968 22110 21790 22384 21472 22031 21624 22045 21792 21773 21947 22120 21521 22469 21497 21961 21600 22169 21644 21718 21980 22268 21334 22647 21446 22048 21969 22145 21675 21900 21966 22180 21525 22542 21319 22144 21526 22097 21671 21864 21888 22309 21399 22477 21299 22122 21654 22121 21610 21856 21694 22272 21434 22631 21226 22301 21514 22120 21654 21873 21955 22169 21191 22470 21457 22210 21187 22707 21479 22075 21923 22002 21422 22243 21302 22397 21220 22523 21625 22041 21960 21936 21516 21979 21650 22253 21249 22541 21421 22071 21643 21959 21752 21815 21980 21891 21400 22144 21425 22247 21316 22272 21679 21866 22272 21842 21524 22159 21216 22246 20840 22885 21583 21685 22652 21271 21453 21715 21559 22430 20867 22993 21239 21411 22301 21261 21754 20929 21257 21852 20555 22549 20881 21477 21812 21066 21927 20705 22448 20844 21437 21611 21497 21514 21376 21673 21495 20971 21869 20936 21449 21213 21571 21476 21200 21809 21294 21381 21832 20859 21563 21106 21607 21230 21243 21600 21494 21443 21698 20827 21614 21005 21562 21300 21224 21478 21616 20837 22040 20929 21539 21308 21272 21241 21300 21494 21606 21049 22039 20854 21563 21331 21364 20981 21477 21172 21686 20874 21936 20870 21534 21219 21405 21272 21197 21474 21333 20951 21400 21243 21449 21005 21848 20847 21645 20937 21834 21127 21372 21616 21201 21024 21518 20995 21752 20793 21957 21082 21460 21509 21248 21015 21722 20899 21527 21027 21685 21360 21286 21625 21249 21136 21573 21003 21568 21043 21457 21317 21202 21665 21533 21687 21872 20923 21560 20832 21741 21473 20952 22139 21069 21454 22028 20567 21278 21345 20992 21655 20716 22375 20958 21562 21876 20564 21412 21229 21005 21752 20466 22057 21388 21080 22459 20611 21157 21656 20682 21640 20554 22198 21311 21423 21581 21287 20868 21855 20909 21660 21104 21872 21159 21301 21743 21255 21175 21472 20976 21674 20794 21917 20978 21531 66 53 4357 7343 8484 10288 9832 11429 11167 43336 39396 28843 25015 24456 22649 23107 21979 22806 22032 22198 22224 22332 21641 22499 21409 22426 71 59 9592 12660 14073 14855 14610 15891 15046 16121 43360 31544 25819 24212 23164 22858 22202 22485 22133 22598 21605 22802 21687 22255 22000 22054 21717 87 11288 15671 15817 17975 17046 18319 17381 18873 17972 36146 26416 24405 22983 22730 22548 22324 21782 22487 21861 22560 21526 22633 21582 22221 21890 22094 8543 16718 18728 19496 19265 20347 19159 20152 19152 20595 27952 23829 23570 21797 22248 21571 22580 22297 21290 23095 21031 22052 21543 22006 22148 21307 22701 16784 19474 21398 19985 21287 20052 21651 20883 20743 33436 23127 22593 22054 22361 21966 21943 22289 21928 21782 21920 21829 22199 21594 22406 21540 21962 21625 22240 21839 21995 21966 21160 21013 21226 21219 21433 21034 21801 20867 21451 20924 21656 21094 21396 21531 21349 20948 21514 21199 21524 21080 21961 20749 21568 20969 21778 21166 21401 21475 21430 20986 21445 21155 21701 20768 21992 20914 21501 21181 21512 21263 21272 21528 21495 21124 21972 20797 21803 20739 22023 20944 21396 21299 21451 21333 21188 21549 21574 21010 21793 20842 21649 20887 21669 21127 21899 21573 21280 21255 21137 21464 21487 21002 21809 20998 21531 20948 21754 21248 21551 21516 21185 21141 21410 21243 21519 20811 22012 20977 21389 21154 21413 21587 20770 22329 20783 21152 21525 21129 21774 20515 22183 21302 21034 22225 20675 21488 20876 21607 21772 20590 22528 21050 20817 21798 20642 21569 20748 21821 21755 20759 22112 21329 21127 21830 20951 21736 20770 21974 21204 21128 21600 21201 21277 21177 21308 21701 20869 21835 21036 21554 21344 21316 21207 21376 21271 21610 21141 21888 20869 21549 21012 21710 21225 21367 21555 21264 21037 21485 21113 21666 20908 22077 20882 21578 21169 21548 21196 21221 21463 21612 21075 21917 20788 21678 20766 21882 21191 21304 21561 21325 21041 21760 20736 21735 20749 21928 21198 21515 21514 21233 21053 21338 21274 21596 20957 21850 20913 21607 20978 21740 21240 21546 21624 21288 21163 21172 21429 21591 21097 21947 20905 21497 21004 21732 21315 21389 21552 21328 21287 21127 21469 21500 21704 21696 20968 21607 20878 21981 21125 21399 21028 21544 21259 21139 21847 21067 21238 21453 21216 21800 20336 22423 20623 21281 21309 21271 21671 20411 22382 20880 21066 21658 20641 21600 20420 22294 21290 21111 22391 20679 21568 20525 22194 21103 21068 22210 20560 21515 20951 21304 21687 20903 22006 20885 21548 21144 21633 21394 21333 21648 21217 21200 21643 21128 21528 20828 21939 21207 21569 21518 21342 20969 21597 21172 21705 20865 21877 21320 21441 21616 21305 21240 21312 21557 21464 20934 21788 21067 21664 20781 21963 21041 21457 21049 21718 21179 21349 21559 21371 20973 21676 21139 21745 20811 22041 20855 21673 20817 21690 21240 21335 21568 21368 21033 21666 21112 21776 20761 22071 20940 21568 21192 21766 21165 21335 21505 21248 21149 21506 21234 21564 20868 22030 21036 21665 21008 21636 21260 21377 21527 21493 21096 21841 20884 21593 20901 21820 60 117 6481 9715 10737 11944 12042 13030 12387 13960 43363 32242 26192 24470 23225 22857 55 12016 14016 16027 15411 16587 15872 17284 16902 43373 31629 25497 24006 22784 23140 5460 13952 17870 16843 18327 17702 19267 18983 18336 43355 29408 24815 23862 22916 23339 7169 18218 18190 19581 19668 20083 20310 19429 21031 19638 28200 24044 23809 22763 22639 10813 19026 20362 20855 20947 21274 20651 21606 20889 21047 26721 23399 22769 22307 22513 22003 21978 22220 22112 22419 21696 22663 21552 22132 21901 22164 21936 22208 22129 21856 21793 21861 22159 21996 21633 22169 21510 22366 21365 22499 21568 22182 21869 22416 21713 22024 22040 21925 21482 22223 21467 22360 21317 22577 21376 22256 21495 22375 21650 22040 21843 21997 21573 21946 21805 22182 21393 22350 21398 22363 21335 22624 21367 22329 21285 22603 21440 22007 21421 22336 21487 22103 21653 22075 21632 21945 21905 22075 21352 21794 21940 22087 21517 22048 21601 22337 21421 22482 21290 22089 21296 22440 21226 21298 20647 21660 20912 21248 21056 21513 21131 20980 21415 21322 21340 21461 21429 21238 21295 20823 22102 20871 21321 20748 
21901 21879 22421 21504 21766 21703 22169 21360 21699 21411 22309 21897 21785 21463 22134 21465 21867 21463 22375 21728 21952 21164 22041 21655 22049 21191 22165 22057 22248 21207 22115 21537 21989 21313 22089 21894 22055 21170 22195 21649 21921 21001 22115 21913 22222 21127 22118 21719 21949 21280 22033 22028 21932 21328 22121 21565 21928 21305 22355 22037 21941 21328 22030 21706 21938 21265 22160 21976 21891 21399 22170 21575 21943 21097 21912 21335 22365 21536 21843 21952 22173 21243 22237 21648 21895 21385 22168 21580 21817 21578 22240 21251 21922 21851 21661 21217 22421 21520 21933 21935 22101 21199 22024 21776 21649 21667 22125 21323 22071 21880 21686 21621 21997 21613 21520 21696 22110 20949 22071 21504 21240 21530 22263 20712 21784 22086 20999 21449 22563 20865 21562 22369 20960 21891 22853 21216 21584 22772 21793 21248 22755 21922 20936 22177 21829 21581 21579 21942 21686 21583 21715 22099 21408 21736 22117 21530 21623 22272 21479 21351 22044 21736 21629 22337 21529 21684 22177 22065 21366 22214 21595 21576 21680 22150 21460 21760 21651 21792 21447 21993 21847 21712 21507 22232 8454 15385 17264 18343 18074 19570 18808 19492 19653 43322 25928 23795 22609 22145 21879 22235 21385 22300 21796 21868 21486 22177 21412 21869 21552 22021 21281 22048 21735 21889 21590 22085 21363 22036 21760 21760 21448 22288 21286 21937 21973 21751 21440 22472 21466 21569 21963 21692 21469 22384 21325 21907 21916 21720 21431 22255 21169 21950 21960 21388 21607 22208 20916 21815 21959 21040 21619 22082 20915 21844 21868 21335 21963 21255 21991 22221 20986 22920 21621 21465 22699 21473 21323 23080 20913 21603 22464 20947 21798 21957 21585 21563 21813 21528 21903 21763 21612 21786 21755 21565 21888 21545 21688 21688 21752 21656 22048 21431 22132 21775 21730 21969 22066 21401 22245 21736 21680 21936 22096 21296 22218 21861 21783 21777 22171 21186 22356 21658 21767 21943 22144 21356 22408 21680 21753 21798 22160 21248 22348 21703 21690 21838 22169 21186 22179 21632 21639 21572 22075 21541 21779 21751 21649 21600 22072 21436 21885 21548 22077 21273 21973 21671 21841 21527 22144 21252 21930 21977 21760 21681 22381 21483 21997 22008 22055 21461 22465 21644 21760 21944 22190 21057 22121 21713 21425 21459 22097 21514 21256 21490 22561 1109 18904 20757 19761 20331 22045 20683 20244 21485 21488 25986 23509 22736 21608 21482 22138 21683 21142 21840 21945 20803 21568 22097 21566 21917 22127 21976 21397 22103 21861 21448 21811 21980 21741 21641 21751 21736 21543 21922 21592 21703 21536 22009 21402 21702 21922 21574 21694 22055 21338 21939 22039 21851 21465 22426 21700 21820 21916 22097 21381 21984 21641 22093 21376 22043 21640 21688 21511 22261 21314 22259 22016 21881 21331 22288 21751 21737 21504 22121 21648 21696 21543 22438 21447 21838 22033 22044 21296 22336 21775 21744 21741 22187 21256 21824 21611 22040 21289 21904 21911 21717 21832 22376 21582 21739 22018 21918 21320 22204 21765 21501 21486 22009 21591 21650 21564 22249 21354 21765 22023 21526 21520 22456 20968 21947 22594 21329 21335 22932 21581 21406 22568 22089 20930 22727 21889 21148 22230 22267 20872 22016 22149 21255 21547 22056 21648 21080 21715 22109 20888 21696 22229 21370 21792 22067 21834 21537 22213 21922 21429 21854 21930 21518 21920 21839 21751 21388 21824 21975 21665 21766 22235 21549 21724 21948 22018 21295 22017 21752 21853 21383 21913 21901 21783 21543 22304 21405 21976 21920 22032 21286 22323 18922 20646 21072 21488 20623 21667 21290 21419 20955 34061 23320 22242 21656 22400 21440 21979 22016 21767 21528 22353 21365 22391 22070 21804 21432 22241 21684 21878 21940 22095 21313 22404 21738 21792 21824 22243 21224 22045 21696 21877 21368 21943 21570 21660 21600 22286 21264 22321 22091 21942 21461 22320 21782 21526 21905 22131 21190 22230 21800 21478 21806 22041 21169 21794 21813 21544 21075 21941 21900 20997 21440 22154 20864 21798 22229 21035 21495 22604 20760 21610 22466 21045 21472 22697 20986 21603 22646 21088 21543 22842 21056 21627 22684 21399 21810 22169 21589 21543 22294 21640 21809 22114 21865 21527 22118 21879 21639 22128 21848 21511 22160 21820 21716 22137 21851 21543 22312 21697 21704 22080 21815 21419 22305 21467 21996 22057 21662 21013 22361 21412 21871 22077 21743 21623 22380 21540 21341 22016 21830 21491 22374 21239 21961 21795 21733 21559 21843 21410 22007 21480 21866 21598 21885 21505 22229 21176 22187 21660 21687 21952 22147 21504 22418 21429 21186 22023 21651 21509 22370 21269 22058 21489 21765 21687 21751 21626 22167 21233 22203 21736 21621 21752 22096 21312 22241 21688 21669 22024 22109 21433 22361 16568 20793 21469 21730 21143 22110 21381 21496 21840 21709 23494 22934 21637 21903 22151 21322 21680 22304 21000 21696 22301 21048 21471 22416 20864 21739 22186 21059 21593 22386 21207 21926 21437 21545 21965 21314 21708 22360 20804 22617 21914 21248 22786 21806 21400 22811 20885 21783 21779 21474 21943 21419 22016 21965 21476 21950 21976 21454 22205 21648 21332 22208 21608 21629 22128 21419 21744 21798 21627 21637 22205 21557 21891 21412 21889 21837 21605 22019 21993 21597 22412 21378 21766 21934 21730 21545 22119 21330 21965 21691 21686 21587 21635 21714 22067 21213 22370 21469 21637 21953 21755 21523 22213 21271 22006 21688 21701 21588 21972 21579 22268 21149 22272 21783 21780 21903 21938 21390 22336 21245 21959 21361 22136 21740 21672 21993 22016 21568 22584 21249 21911 21981 21724 21429 21861 21611 22183 21288 22071 21768 21639 21925 22020 21466 22347 21575 22128 22042 21725 21591 22107 21475 22062 21290 22037 21713 21594 21990 21937 21413 22578 21453 21811 22208 21344 21591 21846 21763 22220 20867 22874 21649 21513 22544 21063 21523 22139 20887 21993 20922 22592 21773 21551 22711 21307 21469 22637 20807 21885 21585 21175 22085 20323 22269 21865 21257 22729 21572 21321 22168 21336 24944 22103 21836 21892 21485 21872 22043 21462 22252 21782 21896 22187 21551 21693 21886 21605 21945 21304 22153 21881 21930 22059 21679 21603 22179 21345 21895 21632 21991 21842 21505 21973 21877 21460 22279 21259 21952 21384 22011 21779 21593 21952 21992 21383 22439 21331 21920 21799 21745 21618 21852 21492 22087 21276 22310 21669 21744 21984 21779 21594 22434 21321 22081 21312 22093 21687 21777 21920 21940 21509 22200 21221 21922 21606 22004 21739 21761 21976 21701 21504 22170 21277 22119 21283 22046 21780 21731 21907 22074 21613 22560 21298 22062 21445 22016 21798 21684 21985 21925 21688 22326 21304 21949 21444 22016 21781 21591 22045 21863 21319 22307 21207 21941 21587 21794 21752 21465 22502 21557 21617 22437 20917 21964 21345 21875 21911 21145 22692 21391 21693 22690 20775 22104 21036 22198 22110 21097 22626 21573 21340 22592 20898 21987 21476 21617 22036 21152 22732 21269 21513 22320 21301 21888 21494 22087 21730 21587 22147 21357 21858 21720 21864 21939 21589 22055 21915 21816 22261 21404 21804 21392 22032 21779 21837 22097 21795 21526 21978 21648 22076 21354 22181 21499 21963 21658 21862 21776 21591 21984 21976 21623 22400 21323 21957 21772 21875 21699 21562 21943 21862 21657 22357 21275 21991 21425 22117 21737 21689 22027 21729 21521 22104 21347 21998 21328 22187 21783 21738 21972 21953 21448 22219 21345 22184 21145 22279 21609 21826 21655 21902 21813 21477 21934 22042 21383 22372 21334 22024 21421 22008 21649 21986 21917 21792 21442 22232 21271 22032 21313 22090 21772 21611 22080 21733 21508 22193 21326 22107 21193 22215 21685 21646 21969 21833 21708 22339 21266 21983 21661 21831 21753 21324 22125 22089 21577 22551 20981 21923 21372 21639 22060 21118 22272 22119 21120 22918 20825 21760 21712 21353 22072 21088 22781 21207 21574 21409 22121 21891 21306 22195 21336 22224 20934 22727 21671 21459 22370 21483 21865 21542 21971 21884 21548 22097 21894 21874 22201 21477 21760 21771 21700 21900 21607 21964 22080 21699 22340 21476 21970 21605 21982 21975 21505 21904 22055 21399 22400 21461 21932 21947 21696 21705 21599 21761 21989 21560 22402 21415 21905 21764 21760 21636 21769 21588 22272 21232 22404 21328 21973 21761 21672 21671 21733 21597 22186 21233 22315 21553 21825 21921 21798 21461 22102 21314 22094 21222 22361 21634 22075 22036 21671 21456 22256 21397 22144 21175 22406 21350 21922 21785 21685 21447 21896 21511 22190 21383 22374 21536 21869 21783 21795 15588 18575 19144 19995 19221 20328 19668 20023 20293 34597 23536 22871 21677 22215 21090 22356 21816 21719 22360 21232 21671 22170 21209 22407 20871 22519 953 19640 21193 19826 20298 21136 20341 21285 20041 21473 27232 22513 23141 21344 22027 21208 22257 21757 21376 22902 20913 21659 21691 21450 21971 21248 22248 15336 20240 21034 20891 21191 21028 21384 21307 20971 21689 24050 22729 21656 22499 21504 21877 21719 21799 21718 21545 22065 21825 21616 21992 21464 22100 21304 19741 20717 21829 21601 21385 21332 21470 21476 21877 39322 23537 21594 22034 21264 22336 21671 22016 21963 21761 21556 21923 21580 22166 21249 22368 21369 22019 20832 21431 21465 21549 21729 21903 21306 22288 21107 25154 21913 22081 21827 21888 22097 21746 21527 22087 21456 22231 21249 22442 21290 21902 21431 22167 21701 21835 21952 21670 21552 21819 21843 22041 21472 22431 21365 22005 21362 22068 21667 21897 21982 21645 21530 21845 21633 22112 21466 22400 21081 22041 20919 22227 22030 21287 22576 21108 21580 21837 21445 22156 21073 22937 20912 21669 21643 21675 22134 21319 22634 21376 21543 22477 21042 22078 20852 22679 21066 21668 21612 21639 22053 21434 22292 21559 21760 21850 21621 21856 21427 21994 21856 21676 22086 21369 21845 21373 22120 21728 21964 21880 21678 21748 21557 21783 22055 21485 22211 21362 22009 21361 22109 21781 21681 21956 21768 21553 22005 21532 22105 21297 22437 21239 21964 21458 21972 21688 21578 21914 22030 21430 22391 21275 21980 21575 22266 21674 21889 21925 21877 21451 22273 21260 22153 21216 22332 21632 21993 21998 21815 21567 22075 21496 22056 21218 22448 21337 22048 21672 21775 21593 21715 21691 22308 21328 22433 21348 21852 21743 21698 21632 21674 21883 22096 21403 22332 21333 22054 21450 22209 21764 21799 21986 21651 21568 21685 21799 22137 21184 22582 21112 21888 21576 21774 21998 21148 22621 21508 21431 22529 20807 22228 20812 22663 21726 21712 22564 20963 21581 21853 21360 22311 20868 22842 21495 21698 22487 20981 21844 21165 22416 21944 21260 22529 21509 21646 21703 21821 22045 21517 22346 21517 21769 21561 22002 21657 21911 22073 21484 21805 21678 21794 22029 21489 22231 21429 21877 21256 22312 21721 21680 21895 21614 21742 21630 21976 21837 21489 22195 21543 22065 21430 22308 21383 21881 21608 21837 21786 21654 21993 21872 21512 22088 21465 22171 21291 22366 21369 21895 21835 21893 21619 21684 21882 22031 21213 22345 21227 21917 21275 22311 21508 22081 21881 21723 21623 21788 21740 22177 21459 22368 21296 21879 21376 22166 21708 21955 21966 21669 21472 22109 21383 22261 21101 22440 21493 22377 21912 21750 21624 21819 21680 22120 21367 22405 21442 21785 21826 21647 21558 21527 22019 21736 21554 22025 21543 22140 21216 22368 21465 21817 21739 21815 21833 21554 22448 21157 21588 21671 21646 22282 21177 22929 20964 21789 21109 22567 21575 21411 22593 21112 21525 21757 21532 22148 21081 22864 20931 21837 21698 21613 22181 21487 22604 20941 21596 21423 22095 21994 21602 22116 21709 21605 22053 21665 22033 21473 22242 21550 21739 22034 21621 21856 21480 22001 21885 21543 10310 17829 19442 19660 20066 19873 19920 20459 19968 20009 26416 22361 22468 21351 22394 26 19791 20386 20484 20627 20710 20925 21106 20613 21499 27006 23069 21808 22308 21711 21824 19288 20589 20708 21152 21157 21537 20992 21864 20881 30498 23001 22243 21994 21764 22008 18797 20617 21549 21125 21845 20976 22068 21080 21665 21320 23284 22114 21835 22120 21717 18401 21242 21447 21961 21233 22272 21166 21845 21497 21690 22803 21984 22049 21690 21586 21839 21780 22077 21575 22392 21253 21816 21593 21980 21777 21826 22055 21609 21654 21649 21932 21810 21579 22078 21592 22068 21224 22440 21296 21753 21561 21768 22056 21600 22424 21025 21668 21448 21907 22311 21026 22831 20768 21773 21273 22085 21952 21420 22660 21097 22049 21101 22282 21760 21057 22403 21233 22224 20939 22796 20800 21893 20960 22860 21047 21546 21643 21890 22038 21556 22183 21332 21931 21434 22221 21632 21685 21703 22016 21640 21705 21901 21814 21764 21648 22129 21585 21577 21696 21889 21948 21497 21735 21986 21824 21550 22115 21457 22118 21414 22256 21275 22119 21205 22316 21313 21888 21191 22344 21362 21884 21540 22100 21661 
37373 37347 42848 32885 35600 35256 40197 41536 35372 41915 41920 37531 36083 42632 40243 42812 37401 42745 42816 35619 37718 39552 38987 34836 38729 39970 40356 39222 41208 40301 39878 33306 38234 40973 39584 37364 39111 39586 40688 34664 37397 37684 39744 37635 40981 39332 39874 35686 38008 40490 38792 38764 37824 41033 40004 33904 37441 40973 42387 39049 37978 41041 38976 35383 37624 40364 40103 38325 37284 41996 40491 33993 37804 38880 40352 38999 34453 41372 40980 35629 34961 35867 33568 43236 40352 42520 41600 42496 41344 34807 37207 43208 40992 38876 40979 33468 40242 40133 34747 34770 41761 39011 40250 34364 32868 34951 41095 38039 33984 36951 40997 37432 38513 34392 32672 34752 39631 37350 39334 32678 40135 33301 41280 34776 35858 39283 37824 42498 34135 35977 33520 42081 37380 37152 37208 39930 33792 36208 35993 40001 36352 37469 37001 40272 36738 33888 33709 37725 35045 33920 35226 39429 41893 35792 39706 33269 34280 40873 43077 41961 39111 35655 34491 41752 33368 34756 40148 39205 41750 40960 34296 33499 34598 39907 42609 35789 34524 35821 42433 38731 36985 35140 32715 40706 26814 29338 38066 40244 37486 32908 34679 31719 33632 41408 39345 37512 34444 39729 37440 41179 41908 41801 36326 37047 42969 40552 42100 37416 33301 38400 40611 38888 35825 37040 33928 39209 41719 38887 35616 35464 42246 41456 40905 37888 38275 35994 42071 43557 42988 33894 38056 35168 42700 42631 41536 37618 37582 35378 42272 41716 39708 38188 38009 41782 34483 40370 36903 36540 38099 38000 34373 39064 36928 36692 37049 41385 38400 40471 38720 41062 37892 37850 34384 42488 35873 42547 41499 39782 36843 34084 42920 37440 36231 37984 33812 33536 36248 32967 37395 35752 34164 35932 35941 33691 36840 33323 34795 34872 35670 34481 38621 42432 40088 36250 35432 37990 39104 42009 41421 35767 34712 37468 39324 40749 40999 37185 36118 35818 40344 39797 42261 34913 35818 37925 39794 41684 42800 35052 35792 36180 39920 40144 42279 35568 35009 36673 40281 39782 40501 34312 34358 33446 39212 33383 35796 35905 34384 33747 38995 42425 37648 33443 39226 40664 38395 34984 36557 33170 39559 40304 37840 38325 35584 34776 42502 43232 38890 38667 39168 42714 43510 34789 35438 37760 40634 38400 39883 35415 41996 42820 39684 33032 40053 42992 34048 19790 35151 34896 34855 41137 39187 34475 39947 43147 43032 40032 44388 36136 34013 42679 40277 35128 39162 36640 37888 35603 33364 39236 33826 37488 40100 38308 41912 39915 37127 42337 36613 38320 35880 34386 35832 35494 33328 37348 33863 35162 32931 38500 41957 35432 37431 33716 35091 39000 41396 38024 38949 37040 42647 43156 35369 36436 37528 39452 41768 38375 34528 39447 41491 39178 34432 34834 32853 41163 41088 41464 38521 37336 41230 41440 36163 35642 32500 39627 34446 34804 33292 42816 42793 37050 38656 38960 40736 41952 36336 35539 35764 40522 40400 36480 34288 38597 40823 37368 37592 35437 36387 42325 34160 35652 38371 37712 41049 40896 35974 43107 43304 38977 34126 34304 33492 41037 41691 36005 38647 33140 32602 42896 37624 38036 34216 40960 41574 38164 33965 41895 34125 39271 36973 35971 37040 39331 41092 41728 36408 38307 40085 40544 33660 38792 34402 38422 35459 39683 36526 34920 40874 41877 36166 39121 36727 33115 40613 37652 42291 37239 37731 33082 37225 36912 35927 41685 36540 38320 34720 35658 41068 33703 35360 37888 38470 41088 38626 35864 36944 41754 37728 37480 36128 33361 41227 42264 38391 37465 38552 40760 42002 36411 33792 38184 42773 33984 34633 40648 42383 37636 34631 41925 41228 34756 42244 42373 38631 38388 35960 32964 41879 41877 42921 39467 36407 42168 41254 35109 37104 37760 39706 41047 42717 35937 35894 36277 41098 40320 39152 35051 37104 41590 38185 33596 34528 33753 41296 40433 41796 39744 37976 42636 41881 36236 33032 37140 39929 39942 41112 36344 42736 36669 38844 39564 36173 36389 33184 38400 37929 37376 37623 42153 40272 36144 36173 40916 38355 43169 34705 34861 34079 43031 38478 42595 35745 37632 34116 34832 38409 33467 36919 38110 34560 35208 41848 36464 40228 34064 33262 41287 34513 36157 39567 37161 33191 39580 37423 34533 39595 36851 32948 39773 36634 35284 39943 37081 33416 41433 35251 35077 39008 36620 42208 41767 43001 38744 39128 34909 37835 42322 42183 37541 39435 36045 34420 42384 33441 41412 38518 36643 42901 42714 40760 38257 36226 35570 33560 36583 41858 38984 42802 37289 34165 37271 32697 40792 39746 40704 34901 35029 37680 40007 32705 42453 42520 40025 38848 34646 32728 42050 40736 39223 42936 36056 35116 35854 34351 40209 40392 40940 35751 34295 35672 39239 40909 41221 35186 34730 38423 39831 42445 42555 31301 35241 42692 35720 39296 39874 41797 43173 36812 35398 43914 38380 34448 37450 40135 41256 34977 41288 37746 34984 41573 38359 42999 42843 36256 35765 40384 38496 34055 42305 40367 37818 42480 33642 38103 40939 35502 42103 35712 34552 37392 40052 36400 36363 41760 36999 36471 36098 35916 42546 38225 42267 38561 38311 42732 38324 38233 42665 41079 34528 41098 40688 34246 34429 39581 42337 35818 36144 34472 34263 40683 33696 37074 41912 37318 36818 34127 38417 38543 34187 42568 41760 36001 37815 35501 33273 39694 41225 38436 35259 34936 33792 34180 35126 39076 40288 42435 43079 34734 37785 36023 32987 40578 40770 38812 35058 35096 33727 37956 33899 41324 39624 41147 36306 35862 37523 37729 41898 42007 40824 38323 41553 40111 35872 34698 38388 38375 33477 33896 39989 37696 38471 35576 42192 37213 34314 40409 40803 39492 35853 34433 37536 38488 42712 42466 34072 39528 38955 35708 33968 39576 42872 39465 40857 38968 35367 33884 38294 37762 42098 34242 42440 36608 40481 41344 34257 36633 35750 40800 36380 37455 34456 32784 33203 38305 33109 39924 36710 38473 36981 34084 35849 33552 35600 40976 43008 35248 35641 37362 33760 39604 39507 41196 41786 37254 40352 36033 33530 40986 40336 41357 38829 39748 36803 37143 42978 37206 38983 42677 41526 36200 37128 40576 33796 35095 37317 34148 37808 40873 40248 37403 37703 39186 35232 34001 40224 41450 37572 34142 38413 36708 32690 38037 37248 42480 41639 40680 37945 41628 39005 36075 33915 37633 38401 41824 43376 41512 37602 36344 35640 34144 36749 42829 39756 40722 41865 35055 35491 38105 36009 33904 42704 41359 39430 40901 39736 35296 35768 37344 37757 32886 40365 40332 37669 34140 38390 35857 35591 38118 35236 32486 40042 40849 40056 40801 39177 36000 35532 37353 39264 34437 33536 40569 39360 42507 38571 36282 34880 38193 37699 34981 41760 41063 38256 42332 38567 36088 33992 38864 37180 41220 41828 40335 38017 33920 35915 35747 42560 44042 33856 34058 42848 37128 38136 41344 37376 37584 39317 35444 41863 35411 35200 35239 39432 38214 40689 39936 38975 34706 33563 41171 34240 36397 38378 42715 34478 38572 39257 36034 40448 33095 41393 41124 37177 42987 39737 35592 33803 39821 41786 37067 35353 36871 37824 33952 38961 37706 36365 41338 42148 36560 41568 38725 36051 36742 39399 36267 33040 38096 34384 39178 41595 40628 43321 38478 34726 36892 35749 33958 38038 38224 34505 42224 41463 38224 35938 37119 35188 33466 37847 37013 34602 42120 40896 38733 42176 39999 35840 35035 38663 35536 32843 39317 41508 38856 41074 40769 36300 35639 38060 37920 42375 41185 41498 40586 39460 41511 34410 36359 34695 37335 36452 42733 38112 38884 41904 42543 41530 38737 42338 38811 34549 38170 37720 35969 42176 41152 40818 38712 40976 39600 36015 34265 38976 35697 32672 40256 41408 39942 39996 41031 35220 34516 37981 36677 35251 41897 40571 38714 34888 36608 35884 41090 40171 39559 33881 33640 37492 37653 41753 34738 39007 39265 41138 40046 38928 37952 35905 35492 35062 41419 39350 38638 36759 40080 33856 41726 40043 37334 40966 40741 41408 40921 37206 35962 34864 42411 42514 43234 37337 33297 38035 37341 33429 39248 37336 37026 40672 42964 35809 35896 35041 37264 34240 38001 39140 35246 41833 42920 38346 34193 38315 38423 32780 37036 39092 42057 42618 42880 38006 38071 34992 35181 34145 35516 38360 33530 42277 42410 37552 35703 35463 34222 35702 33737 40869 40299 42681 41257 38427 35717 34672 34837 35508 34048 40338 40387 42000 33616 36300 37480 36208 42552 39801 41032 39768 40320 42480 34486 39217 38791 34999 42218 41333 42080 39996 39879 42771 41728 37711 36096 34978 42400 37415 32997 40425 41929 42664 33317 37032 36112 35991 32194 32176 38222 37707 39250 41161 34186 37877 40771 40488 44500 37861 35072 40784 38800 42229 36592 35501 42085 40353 35096 40156 40219 42908 36632 44071 28775 33264 39664 35840 40726 39126 41443 40920 38281 42700 43073 44137 40725 41376 38976 40016 41368 36241 41376 38019 36769 34773 35083 42329 38434 40109 41251 39456 40025 38198 36683 39904 38027 41649 41296 37839 35124 39993 36034 34512 43563 32904 37029 35520 36256 35383 33272 38872 36513 34062 38235 42584 39712 40968 35087 34755 36377 33939 41540 41376 43013 42980 37487 39825 44567 34320 38521 40298 41952 35152 38208 38249 35688 33350 37440 33804 40083 40292 42324 41960 38768 35829 42289 42938 33795 35331 37488 40988 41408 39140 41010 37680 39248 36659 36961 39424 35784 33139 39293 42439 41338 40369 43254 41047 37635 42384 40568 35380 36668 37757 34836 33158 36390 36737 38832 42592 43417 41974 38866 41588 39296 34885 37193 38444 34653 33024 36595 34224 39372 42752 42635 38912 38949 37063 40950 38960 40915 34085 38738 33894 36628 42377 40332 38607 38202 36644 34805 34423 34871 39872 41301 35036 41262 33629 43365 38365 39481 36216 35314 38349 34762 34105 34364 38877 42376 41623 33874 35399 36763 34341 36624 42189 38697 36825 34887 39264 41804 37024 41845 39927 35495 38050 37192 35020 35639 33441 35954 39054 43089 41012 41685 38919 41584 39985 36149 34848 37819 35762 33303 38458 33248 39467 40864 43222 40795 38303 42496 38356 35063 33646 37356 38805 42329 43008 40938 38520 33892 41280 35072 37002 37666 37222 42560 41385 40588 40260 40069 42104 34380 38345 38701 36597 33833 39206 43025 39208 40147 43112 41611 38930 34852 36010 33931 35216 35124 41477 41209 43082 41626 37089 35946 35000 34037 34715 37291 39298 42128 42216 41511 39203 42551 40891 35860 36279 38252 34615 33326 34830 36230 39984 39687 34283 38808 37066 33623 35854 38584 39403 34896 32599 42120 33568 35569 40800 35854 35081 35514 35062 33693 37239 33932 36833 41396 41994 36358 37080 43072 35307 43575 37920 36750 39632 42712 38049 40458 33496 32659 34380 35180 36538 38985 33152 41888 33304 35688 33493 38333 34713 37429 39264 42987 36688 35002 35960 38746 42922 41364 42472 37446 40263 41771 35692 34706 37249 34348 35717 34482 38074 36832 42797 40835 33607 38901 42342 41816 41999 37497 34096 36661 36057 34552 38378 37003 32776 39110 42740 40665 41044 42642 41984 37580 36784 37237 34344 34772 37184 38896 40340 42258 40589 37852 40707 41961 32989 39012 37352 35589 34420 35962 35668 40212 42711 42451 40896 37492 41408 40416 35474 37908 38272 34865 42389 40004 41929 41609 39208 43079 43297 42690 37654 35866 34256 36442 34753 39608 41899 42880 42539 36311 36408 34670 33412 32999 38368 35619 33296 38455 33485 39899 40058 42311 42930 36737 35776 36497 36624 33334 42755 39689 33956 34752 34504 41191 39899 38050 37373 36242 38962 34112 33664 41824 34404 38813 33189 35843 33136 39712 38774 37248 36996 36800 35017 34260 40299 43256 34739 37128 34035 42176 39925 38615 34055 39511 35520 34056 38856 34748 38547 42698 41276 33716 35640 38564 34417 36636 42686 38752 37494 33435 26208 34259 41347 34165 38178 36261 36643 42569 37256 37888 44133 42629 43561 41894 42921 18334 34793 41427 31962 33351 34455 36944 38841 33492 42935 40968 39829 36276 41523 35740 36162 40010 33489 34385 39041 39529 33280 37171 36950 36300 47025 39336 41224 38688 35752 38534 34963 33373 33312 38858 36896 37380 39104 38624 34747 40902 42037 39847 36885 39704 35528 40596 40608 42699 38337 40307 41164 39828 36928 43008 35363 36528 38144 38896 35163 33687 36736 35885 39352 33911 42394 40549 36526 33953 38185 35907 36358 39074 34280 34485 34325 37632 36279 33824 39240 33977 38948 40224 43125 40928 36076 33523 35578 38887 33947 42599 38109 34778 42179 37656 41812 38088 37192 34958 35913 40484 39536 37873 42199 35142 38768 38939 39072 41442 35712 38246 42624 40524 40880 37376 36519 35312 37184 37190 37315 38343 33421 34368 36973 38785 33481 40356 41299 38026 42341 41229 34322 34909 35207 38215 34391 35136 37362 36434 35660 34279 39688 33888 33601 34769 36982 37940 43068 36007 38244 36376 33470 39553 42560 40020 42202 41349 40879 40064 40133 41920 41127 37191 39917 42117 41739 37513 33193 39276 34934 
22799 23970 23317 23456 23120 23849 23156 23383 22743 23767 23534 23705 22873 23608 23132 23924 22811 23640 23430 23781 22647 23706 23241 23567 22864 23415 23437 23833 22960 23404 23217 23476 23061 23257 23418 23814 22740 23530 23080 23464 22720 23444 23366 23867 22946 23375 23376 23599 22923 23268 23500 23780 22768 23470 23295 23348 22936 23449 23536 23760 22927 23590 23188 23415 22856 23424 23591 23713 22936 23543 23271 23330 22636 23483 23609 23509 22761 23520 23276 23220 22390 23320 24037 23328 22541 23747 23368 23061 22435 23937 24186 23262 22447 23495 23447 22876 22350 23664 24147 23385 22432 23229 23780 23123 22577 23146 24100 24008 22425 23190 23707 23248 22592 23300 24080 23270 23040 23107 23389 23139 22976 23404 23630 23030 23070 23264 23182 23205 23036 23500 23728 23143 22939 23335 23536 23038 23111 22855 23720 23443 23311 22737 23540 23160 23344 22912 23230 23311 23664 24176 24175 24538 24401 23817 24612 24297 24059 24300 24433 23651 24677 24209 24018 24185 24501 23880 24241 23950 24320 23729 24380 24332 24083 23949 24669 23872 24310 24378 24314 23892 24795 23974 24224 52 6667 8807 11980 12206 13252 13485 14607 14299 15048 37220 30402 27461 27184 26349 26006 25416 26166 24877 25428 25171 25066 24680 25552 24533 25033 25079 24967 24309 25210 24329 24836 24654 24823 24112 25113 24461 24373 24515 24666 23889 24859 24364 24211 24250 24695 23830 24738 24353 24056 24365 24517 23707 24649 24221 24027 24536 24517 23715 24957 24235 23792 24896 24281 23553 25253 24109 23884 24994 24149 23652 25227 23617 23987 24734 23431 24166 24064 23716 24322 23612 24175 24435 23497 24416 24359 23287 24909 24197 23715 24535 24012 24078 24332 24072 23777 24549 23760 23923 24299 23912 24064 24470 23734 24454 24144 23861 23680 24475 23506 24090 23853 23932 23784 24209 23437 24112 23871 23865 23708 24311 23497 24079 23821 23812 23532 24058 23441 24135 23605 24044 23637 24040 23408 24064 23656 23803 23577 24239 23501 24148 23708 23900 23524 24329 23321 24028 23901 23845 23610 24457 23424 23986 23916 23877 23426 24499 23435 24116 23962 23967 23409 24397 23668 23810 23912 24066 23233 24194 23748 23636 23764 24068 23531 23849 23693 23648 23644 23983 23592 23712 23529 24068 23261 23731 24152 23451 23450 24764 23610 23232 24512 9937 14737 17763 17808 17485 17969 18701 18614 18053 18565 28653 25463 25390 25956 24459 24421 25656 24064 24151 25315 24416 23757 24352 24470 23753 24147 24002 24220 23600 24077 24231 23856 23629 24423 23644 23415 24156 23856 23826 24484 23780 23833 24192 24132 23512 24317 23753 23889 23972 24209 23360 24142 23768 23676 23566 24025 23651 23661 23397 24299 23291 24036 23891 23873 23476 24330 23554 23611 23769 24048 23135 23877 23533 23815 23111 23729 23707 23639 23424 24258 23418 23472 23590 23966 23145 23677 23437 23820 23256 23847 23523 23565 23376 24183 23207 23680 23833 23822 23113 23997 23585 23352 23360 23808 23329 23625 23488 23660 23139 23715 23673 23506 23217 24098 23492 23415 23792 23838 22907 23989 23607 23029 24052 23936 22785 23866 23969 22962 23397 23871 23021 23160 23463 23951 22824 23669 23557 22733 23399 24019 22730 23335 24193 22996 23196 24469 23191 23255 24485 23604 23276 23672 23778 23057 23560 23392 23633 23106 23472 23524 23249 23273 23862 23020 23536 23740 23546 23075 23812 23420 23287 23351 23746 23188 23390 23261 23836 23009 23620 23588 23606 23063 23920 23402 23256 23322 23737 22979 23499 23257 23669 261 18490 18552 19242 19164 20059 19270 19968 20087 20168 27367 26000 24538 24385 24267 24413 23332 24357 23732 23896 23804 24181 23130 24087 23572 23683 23531 23957 23337 23617 23442 23831 23133 23878 23317 23552 23267 24078 23134 23829 23788 23739 23276 24023 23348 23490 23639 23815 22922 23689 23490 23434 23072 23511 23533 23394 23383 23713 22999 23540 23514 23271 23298 24133 22883 23449 24164 23186 22938 24471 23475 22837 24343 23530 22787 24413 23420 22780 24131 23719 22634 24151 23665 22714 24043 23872 22615 23915 23728 22613 23839 23840 22736 23351 23736 23042 23414 23363 23203 23229 23549 23043 23420 23324 23397 23109 23429 23101 23274 23328 23461 22937 23461 23078 23463 23264 23277 23156 23585 23080 23487 23245 23207 23265 23644 22774 23756 23306 23159 23388 23642 22760 23656 23311 23255 23155 23735 22739 23796 23192 23198 23242 23581 22758 23849 23147 23394 23406 23264 23216 23878 22888 23680 23453 23153 22904 23781 22774 23459 23093 23318 23009 23296 23027 23672 22700 23745 23274 23057 23379 23530 22864 23892 22781 23540 23303 23226 22895 23741 22703 23413 23281 23101 23052 23405 22887 23451 23051 23211 23161 23375 22844 19467 20221 20625 20690 20909 20788 21323 20732 21105 38482 24484 24107 24107 22954 24373 23545 23072 24277 23640 22693 24277 23434 23030 24338 23562 22646 24389 23439 22836 24274 22954 22986 24335 22653 22547 24121 22645 23089 23677 22647 23535 22969 23052 23509 22761 23594 23253 23150 23469 23241 22972 23698 22872 23312 23419 23028 23148 23293 23068 23463 22777 23463 23273 23004 23333 23390 22838 23782 23085 23258 23402 23207 23056 23694 22794 23298 23017 23301 23109 23199 23067 23521 22640 23660 23085 23093 23344 23446 22841 23830 22947 23504 23119 23112 22915 23439 22868 23594 22609 23639 23122 23117 23373 23398 22787 23708 22937 23297 23293 23183 22860 23680 22633 23403 22869 23380 23056 22960 23270 23529 22663 23717 22685 23188 23027 23262 22951 23164 23013 23547 22531 23676 23045 23475 23355 23156 22820 23523 22695 23296 23076 23062 23104 23112 23040 23425 22634 23498 23124 23035 23433 23152 22936 23571 22791 23181 23062 23121 22995 22977 23068 23429 22336 23929 23137 22848 23848 22531 22951 23305 22578 23568 22284 23761 23400 22755 24017 22817 23084 23592 22411 23412 22505 23471 23409 22394 23906 23149 22748 24144 22705 17860 21742 21321 22013 21538 22424 22080 21732 22183 22248 23783 23889 22975 23280 23415 22984 23056 23322 22899 23366 22742 23552 23169 23221 23366 23118 22860 23494 22736 23272 22646 23525 23104 23008 23361 23207 23040 23656 22649 23223 23041 23165 23066 22963 23238 23363 23000 23593 22616 23237 23033 23168 22894 23176 22944 23499 22606 23728 22774 23298 23263 23073 22773 23460 22640 23347 22819 23280 23004 22899 23094 23200 22695 23775 22568 23284 22710 23236 23015 23011 23265 23315 22835 23709 22512 23172 22809 23312 23032 22914 23219 23235 23185 23666 22626 23253 22807 23219 23040 22925 23164 23189 22810 23628 22656 23279 22977 23148 23005 22919 23156 23264 22840 23603 22641 23136 23035 23081 23047 22892 23191 23240 22838 23598 22749 23123 22881 23077 23280 22547 23878 23022 22689 24059 22184 23020 22861 22949 23414 22337 23831 23274 23245 23844 22232 23012 22897 22801 23392 22363 23839 22951 22652 24065 22220 23041 22805 22908 23459 22539 23985 22773 23123 23068 23110 23108 22925 23260 23144 22769 23471 22649 23042 22980 22896 23004 22817 23172 23228 22521 23479 22641 23206 22745 23282 22933 22956 23269 22928 22684 23219 22820 23364 22788 23599 22616 23221 22908 22987 22913 22881 23051 23276 22592 23625 22617 23239 23072 22998 22976 22919 23095 23296 22837 23584 22424 23168 22744 23249 22928 23026 23179 23110 22697 23517 22507 23229 22871 23292 22944 23127 23238 23213 22671 23534 22687 23379 22528 23783 22682 23131 23016 23221 23000 23072 23282 23457 22952 23680 22624 23315 22560 23552 23065 23160 23317 23251 22816 23619 22722 23314 22841 23442 23101 23041 23264 23251 22871 23449 22771 23330 22801 23303 23031 22866 23264 23368 22852 23764 22780 23252 23208 22769 23261 22633 23848 23152 22855 24092 22516 23025 23553 22430 23120 22770 23393 23321 22713 24208 22455 23000 23029 23030 23526 22782 23856 22519 23268 22528 24065 22679 22903 23401 22610 23462 22479 23372 23286 23136 23639 22668 23200 23103 23185 23116 22828 23331 23345 22971 23557 22848 23172 23255 22928 23033 23111 23053 23404 22772 23675 22730 23143 23105 23048 22969 23095 23009 23552 22671 23697 22828 23188 23213 23035 22983 23095 23048 23418 22766 23708 22798 23768 23225 23050 22743 23495 22821 23537 22673 23722 22848 23265 23313 23067 22791 23463 22727 23500 22535 23724 22842 23326 23188 23225 22784 23601 22633 23377 22501 23597 23045 23129 23272 23257 22700 23559 22837 23517 22550 23629 22930 23149 23249 23105 22859 23336 22860 23478 22724 23697 53 8644 11393 12483 13199 14028 13851 14466 13863 14701 32122 27424 26607 25693 24976 25176 24324 24840 23677 24883 24296 23769 24998 23624 23748 24413 23175 10974 14894 17202 17223 16647 18334 16925 17325 18216 16936 28476 25576 26281 24590 24816 25092 23916 24672 23593 24689 24439 23767 24293 23913 23733 24084 23732 18062 18381 19576 19207 19731 19835 19487 19719 19478 36573 26024 24868 24586 24384 24526 23752 24640 23627 24033 23891 24004 23841 23636 24031 23728 23477 23935 19749 21115 20434 21553 21011 21416 21253 21214 21008 27148 24690 24520 23779 24419 23353 24078 23354 24216 23511 23880 23848 23584 23304 23749 23404 23982 17856 22543 21821 22375 22225 22353 22191 22172 22385 22653 24209 24265 23251 23757 23216 23777 23492 23600 23565 23465 23111 23592 23365 23879 23193 24084 22953 23632 23084 23911 23377 23564 23598 23398 23325 23377 23469 23630 23287 24022 22935 23662 23064 23772 23399 23459 23772 23300 23318 22953 23999 23435 23398 24300 22605 23562 23010 23980 23519 23173 24385 22698 23491 22990 23671 23780 22840 24480 22594 23431 23284 23329 23764 22684 24323 23132 23062 23961 23213 23749 22880 23792 23296 23217 23554 23146 23660 22928 23843 23040 23350 23421 23144 23354 23239 23655 23357 22630 23759 22989 23620 22820 23879 23126 23416 23481 23256 23256 23167 23437 23526 23200 23803 22871 23504 22904 23767 23217 23347 23537 23270 23112 23432 23054 23729 22981 23920 22805 23505 23074 23494 23149 23147 23299 23590 22915 23740 22839 23594 22955 23630 23232 23229 23362 23479 22947 23881 22795 23680 22813 23672 23217 23171 23602 23219 23015 23718 22968 23760 22665 23898 22947 23408 23305 23263 22999 23267 23220 23606 22762 23831 22944 23396 23440 23145 23164 23269 23317 23499 23351 23713 22814 23399 22883 23598 23206 23351 23424 23081 23126 23072 23407 23500 22788 24256 22598 23171 23109 22993 23623 22540 23991 23341 22912 23859 22609 23578 22567 23861 23392 22861 24081 22630 22909 23590 22714 23675 22408 23905 23145 22547 23755 22643 23392 22503 23857 23232 23258 23473 23095 23115 23177 23332 23362 22936 23648 23013 23385 22828 23595 23214 22950 23480 23068 23150 23046 23356 23431 23009 23457 22912 23386 22778 23697 22916 23264 23157 23355 23128 23150 23385 23111 23009 23188 23257 23450 23030 23789 22803 23281 23013 23256 23152 23191 23361 23160 22855 23459 22876 23607 22703 23808 22726 23377 23196 23207 23075 23042 23285 23450 22231 23633 22720 23542 22639 23800 22963 23078 23331 23107 22960 23367 23086 23460 22799 23760 22679 23491 22730 23527 23073 23131 23403 23178 22864 23482 22837 23478 22696 23643 23017 23384 23315 23153 22972 23269 22914 23451 22737 23718 23096 23522 23061 23381 23185 23204 23385 23077 22971 23447 23056 23515 22613 23951 22620 23436 22518 23607 23276 22933 24026 22466 23034 22596 23521 23465 22720 23815 22504 23516 22562 23927 23306 22901 24101 22455 23086 22923 23161 23501 22764 24201 22408 23185 22499 23524 23253 22834 23880 22644 23207 23016 23287 23154 23027 23424 22977 23045 23136 23098 23382 22769 23584 22960 23145 23204 23061 23154 22992 5353 10456 11542 13573 12936 13776 13563 14216 14231 43653 29384 27008 25704 25680 24608 11475 15409 17105 16896 16624 17497 17460 17434 17589 17757 29275 26318 26385 24798 25318 9901 18885 19000 19948 19671 19557 19605 19741 19725 20158 27526 26546 24823 25024 24470 24896 20118 21004 21193 21200 21021 21418 21111 21696 20956 28610 24608 24711 23869 24590 24008 21651 22439 22451 22243 22490 22472 22821 22088 23086 21991 24453 23691 24220 23724 24033 23936 23599 23547 23618 23674 23961 23396 24185 23234 23724 23281 23991 23440 23366 23789 23562 23580 23559 23825 23344 23317 23563 23546 23832 23146 24383 22897 23697 22845 24106 23511 23141 24211 22748 23460 23177 23753 23746 23044 24408 22543 23634 22832 24149 23068 23234 23860 22824 23729 22799 24410 22896 23301 23081 23597 23623 23129 23273 23467 23642 23168 23574 23171 23203 23196 23396 23390 23127 23530 23144 23591 23083 23744 23084 23537 22919 23724 22925 23399 22984 23583 23256 23560 23464 23176 23208 23377 23570 23229 23288 23264 23536 23363 23094 23311 23495 23528 23042 23414 23498 23584 23129 23697 23163 23700 23062 23854 22857 23657 
21797 23156 22197 21950 22567 24108 22834 21876 21680 23188 22369 22344 21461 23396 23506 22299 21606 22997 22365 22217 21346 22860 23596 23040 21491 22364 22962 22513 21441 22550 23540 22536 22152 22501 22791 22585 22281 22544 23240 22404 22266 22455 22823 22319 22400 22351 23015 22768 22401 22380 22832 22330 22237 22426 23037 22306 22287 22384 22820 22609 22296 22496 23018 22072 22457 22336 22802 22281 22349 22502 23344 22161 22392 22309 22752 21986 22442 22408 23134 22176 22565 22260 22809 22091 22511 22471 23140 21750 22835 22251 22792 21990 22544 22515 23143 21904 22569 22216 22746 22004 22485 22280 23303 21952 22484 22159 22797 21803 22420 22205 23399 22057 22457 22169 22662 22003 22212 22405 23148 21792 22778 22095 22808 21520 22721 22327 22957 21651 22759 22192 22784 21923 22601 22448 23269 22041 22495 22048 22913 22017 22455 21808 22973 22496 22670 21651 22656 22084 22821 21541 22812 22657 23026 21796 22458 22393 22679 21993 22272 22139 23239 22384 22095 21895 23132 22240 21875 21268 23211 23188 22352 21224 22804 22587 22307 21430 22183 23267 23404 21448 21841 22657 22510 21632 21787 22837 53 80 87 118 70 78 54 38637 33648 28502 26720 25588 24015 22656 23421 21673 22085 21881 21985 20674 21776 21317 20984 21296 21436 21071 20920 21449 20532 20955 21304 20629 20181 21389 20481 20808 21063 20849 20531 21435 20590 20667 20892 20897 20382 21408 20278 20647 20872 20710 20247 21328 20096 20893 20654 20642 20525 21265 20059 20896 20639 20600 19975 21268 19872 20921 20506 20596 20257 21145 19977 20981 20243 21153 20389 20564 20407 21198 19896 21488 20422 20916 20640 20827 20198 21326 20044 20809 20666 20907 20193 21313 19927 21160 20288 20745 20140 21296 20129 20995 20487 20759 20314 20985 20150 21011 20081 21207 20628 20633 20564 21307 20085 21306 20567 20787 20654 21337 19929 21175 20875 20444 20459 21572 19528 21682 20920 20109 21441 21456 19704 21420 21126 20162 20608 21556 19734 21561 21229 20130 20865 21418 19985 20801 21011 20632 19955 20771 20992 20565 21069 20733 20769 20763 21328 20577 20916 21241 20786 20759 21443 20653 21065 21258 21099 20743 21738 20903 20993 21351 21418 20462 21608 20919 20970 21037 21510 20400 21249 20805 21155 20503 21353 20955 21063 20583 21821 20441 21478 105 89 159 80 82 1787 2851 4419 4247 43592 37300 32836 28631 27723 25960 25198 23971 24545 22790 23511 23164 22999 22299 23305 22264 22301 22108 22836 21323 22493 21649 22328 21218 22291 21615 21910 21484 22478 21037 22023 21705 21649 21397 22434 21163 22023 21732 21687 21261 22459 21252 21750 21892 22001 20782 22336 21546 21320 20995 22016 21245 20841 21220 21975 20395 21447 22388 21001 21277 22843 21270 20972 22346 22108 20499 21391 21600 21741 20385 21350 22286 21015 20977 22752 21719 21074 21806 21657 21324 21447 21808 21193 21411 21329 21756 20997 21506 21784 21330 21368 22185 21388 21464 21610 21986 20980 22087 21536 21349 21335 21696 21381 21454 21211 22276 21015 21875 21728 21706 21127 22213 21001 21737 21547 21776 20894 22324 21235 21607 21460 21991 20773 22001 21274 21515 21264 21984 20855 21800 21251 21901 20847 21943 21268 21530 21082 22187 20900 21779 21699 21573 21296 22474 21309 21778 21456 22123 20782 22096 21150 21837 20950 22132 21172 21523 21127 22377 20887 21817 21844 21818 21077 22278 21430 21528 21393 22119 21203 21590 21317 22272 21042 21721 21932 21728 21035 22802 21629 20777 22094 22135 89 2501 6570 7987 10069 11735 11140 11649 12482 13792 37216 31953 29300 25888 25336 25943 23527 23425 24429 22800 22492 24188 22260 22313 23796 22510 22200 22520 22596 21847 22704 22343 21925 22326 22371 21699 22116 22122 22279 21720 22129 22277 21829 21798 22496 21589 22127 22208 22119 21677 22589 22009 21784 21769 22456 21268 22375 21839 22087 21680 22293 21551 21839 21597 22281 21103 22103 21815 21877 21588 22734 21207 22176 21914 21959 21924 22568 21349 22025 22027 22050 21355 22694 21396 22007 21896 22306 21319 22695 21504 22208 21892 22280 21191 22569 21579 21973 21959 22334 21140 22787 21615 21967 21829 22506 21061 22553 21674 21768 21719 22443 21157 22255 21681 21940 21939 22235 21108 22534 21741 21748 21968 22162 21400 22599 21558 22039 21970 22287 21338 22775 21416 21821 22551 22026 20973 23229 21257 21603 22881 21586 21201 23072 20697 21748 22631 21072 21734 22199 20774 22019 21687 21233 21743 21769 21228 22283 21149 21815 22202 21074 22587 22179 21008 23167 21425 21569 22501 21568 22518 22119 21637 21646 22066 21512 22057 21728 21731 21833 21692 21819 22152 21362 22069 21921 21679 21916 22329 21331 22400 21945 21648 7859 12568 13495 15872 15976 16570 16946 17822 16802 37802 30098 27144 25575 24457 23233 24149 22558 23152 22964 22896 22546 23281 21799 22766 22437 22428 21867 23073 21593 22556 22096 22149 21792 22708 21483 22528 21651 22484 21848 22180 21789 22731 21286 22833 21729 22209 22223 22008 21648 22602 21378 22478 21531 22439 21701 22119 21741 22554 21376 22937 21691 22167 22181 22306 21459 22939 21536 22327 22061 21986 21657 22480 21396 22257 21723 22439 21864 21963 22019 22280 21562 22855 21568 22131 22286 21888 21607 22855 21184 22167 22157 21409 22232 21457 22305 22673 20978 23245 21562 21845 22946 21410 21610 23039 20888 21883 22436 21235 21927 21653 21895 22512 21052 22706 22239 21221 22966 21689 21975 22988 21129 21914 21851 22004 22408 21432 22677 22027 21920 22343 21965 21834 22470 21568 22114 21840 21892 21859 21781 21876 22400 21392 22451 21831 22075 22285 22108 21940 22739 21522 22144 21949 22052 21749 21984 21721 22472 21248 22639 21883 22044 22191 22299 21665 22770 21264 22311 21559 22310 21826 21935 22024 22450 21505 22807 21375 22259 21926 22133 21718 21977 21958 22444 21489 22823 21577 22070 22060 21978 21608 22679 12262 17203 17262 19520 19051 19840 19867 20209 19736 20960 26522 25333 23488 23552 22560 22957 22247 23117 21657 23229 21895 22708 22393 22237 21879 22624 21708 22611 21669 22876 21873 22380 22320 22104 21671 22744 21456 22375 21687 22452 22052 21990 22282 22227 21735 22712 21363 22504 21331 22371 22228 21383 22595 22500 21432 23367 21026 22009 22324 21325 21915 21986 21492 22650 20919 22951 22165 21529 23054 21835 21749 22762 21145 22306 21257 22559 22183 21336 23155 21515 21604 22868 21355 21948 21889 22023 22416 21631 22686 21696 22132 22274 21760 22037 21932 22043 22318 21665 22514 22075 22135 22208 21917 21909 22070 21907 22368 21610 22784 21691 22332 22374 21941 21815 22200 21769 22472 21360 22766 21799 22090 22278 22022 21719 22384 21903 22546 21501 22843 21609 22244 22125 22152 21611 22306 21732 22626 21299 22880 21612 22151 22241 22123 21735 22171 21753 22621 21357 22895 21529 22425 22085 22030 21559 22520 21681 22656 21367 22938 21499 22449 22007 22048 21943 22080 22077 22378 21858 22828 21292 22629 21482 22365 21799 22025 22111 22603 21662 22852 21434 22450 21423 22663 21863 22278 22276 22128 21716 22414 21725 22491 21514 22809 21399 22364 21739 22345 21990 21943 22234 22336 21848 23097 21527 22148 21671 21936 22257 21399 22881 21922 22123 23185 20941 22433 21140 22532 22292 21608 23104 21553 21642 22438 21230 22550 21334 22805 22390 21702 23297 21635 21860 22499 21789 22933 21076 23507 21191 22132 21843 22029 22458 21678 22771 22068 22076 22640 21991 22222 22211 22451 22421 22103 22805 21888 22195 22444 22023 22218 22159 22387 22601 21884 22864 21728 22328 22295 22388 22152 22071 22263 22711 21556 22983 21877 22832 22393 22130 21911 22579 21872 22677 21479 23069 21802 22439 22249 22130 21875 22807 21570 22753 21483 22855 22006 22480 22300 22305 21780 22612 21877 22793 21703 23077 21514 22712 21479 22993 21671 22513 21976 22631 21975 22176 22260 22612 21668 22831 21524 22705 21581 22699 21824 22423 22273 22689 21836 23215 21590 22655 21889 22495 22073 22281 22195 22616 21710 23027 21588 22519 21901 22555 22195 22243 22077 22713 21825 23023 21687 22547 22215 22243 22026 22105 22459 22575 21676 23475 21273 22277 22265 21651 22166 21861 22069 22953 21370 23584 21106 22273 22234 21666 22306 21913 21959 22867 21009 23393 22092 22528 22907 21309 21953 22327 21579 22770 21095 23267 22120 22276 22763 21792 22315 22272 22122 22376 22126 22643 22112 22632 22650 21845 22264 21997 22450 22288 22011 22542 22149 22007 111 87 85 89 1033 2873 4295 5900 7101 7247 43674 42639 36507 32396 30099 28394 27306 26453 26151 24921 25820 24089 24719 23968 24356 23661 23865 113 95 4119 8629 9294 11544 12142 13181 13417 43604 43685 37594 32051 30629 27565 27619 25495 26551 24937 25153 24652 24387 23847 24548 23435 24289 22994 2560 7850 12041 13446 14947 15415 16423 16920 17559 43317 36915 31451 29390 26688 26957 24838 25281 24388 24800 24084 24032 23980 23925 23308 23745 23095 3628 10357 15244 15850 17815 18149 18386 18839 18633 20060 36374 29675 28633 25019 25850 23546 25395 23837 23664 24388 22707 23596 22929 23296 23886 22328 24422 12707 17433 19101 19304 20462 19754 21625 20576 20377 22024 27109 25831 24537 24144 24055 23289 23960 22857 23093 23153 23313 23221 22863 23441 22697 22764 22681 22976 23139 22551 23320 22432 23229 22332 23452 22980 22977 22910 22857 22741 22821 22796 23255 22489 23513 22212 23000 22423 23056 22510 23101 22690 22708 22380 22835 22532 23216 22167 23568 21938 22929 22048 23213 22472 22662 22760 22610 22167 22930 22231 23120 21922 23479 22087 22905 22386 22840 22308 22678 22662 22659 22214 22688 22382 23152 21796 23531 21813 22912 22247 22693 22135 22628 22492 23008 22021 23068 21835 22981 21750 23287 22078 22710 22400 22546 22132 22360 22535 22791 21974 22977 21744 22825 21930 23052 22323 22528 22784 22320 22147 22313 22485 23121 21557 23763 21410 22720 21821 22684 22784 21798 23305 22291 21602 23380 21356 23017 21272 23216 22640 22194 23475 21858 21933 22855 21760 22966 21293 23265 22342 22192 23521 22103 22410 22441 22460 22372 22164 22778 22359 22176 22601 22155 22728 22029 22693 22491 22409 22786 22205 22207 22809 21828 22746 21814 22959 22293 22399 22498 22254 22164 22337 22372 22700 22017 23164 21683 22807 21760 22853 22116 22672 22538 22467 21897 22673 22063 22853 21572 23266 21899 22848 22506 22490 22134 22357 22367 22714 21775 23162 21712 22794 22011 22676 22096 22369 22356 22838 22018 23185 21569 22891 21608 23082 22018 22769 22381 22406 21995 22466 22218 23053 21719 23222 21517 22809 21524 23144 21942 23169 22297 22462 22056 22286 22268 22771 21874 23078 21664 22809 21566 23111 21896 22548 22231 22581 22168 22213 22503 22486 21964 22560 22288 22753 21835 23246 21478 22615 21608 22742 22333 21739 23160 21703 22021 22135 22400 22848 21530 23719 21447 22280 22125 22073 22661 21547 23283 22308 21248 23473 21482 22930 21207 23556 21557 22288 22681 21702 22433 21745 22850 22477 22077 22560 22070 22183 22288 22272 22522 22167 22794 21948 22272 22321 22330 22497 22135 22732 22319 21632 22728 21860 22502 21961 22697 22272 22155 22757 22242 22051 22849 21966 22820 21812 23108 21840 22530 22002 22557 22274 22163 22513 22355 21929 22395 22190 22724 21877 23140 21581 22693 21771 22957 22056 22633 22384 22410 22121 22262 22315 22723 22008 23049 21617 22613 21828 23005 22054 22505 22406 22402 21901 22722 22035 22727 21700 23148 21639 22695 21895 22595 22168 22366 22473 22605 21936 22589 22011 22916 21720 23273 21634 22704 22069 22613 22178 22245 22345 22646 0 93 82 1063 3145 6169 6848 8226 9216 43634 43673 40660 34513 32094 28688 119 3071 8653 11022 12745 13845 14345 15585 15936 43650 43696 37728 34161 29696 30016 471 8659 13720 14487 16640 16624 18557 18724 18054 20149 41324 34962 30598 29400 27879 6846 14009 15703 18037 18816 19785 20441 19345 21605 19348 37568 30645 29221 26976 26363 25973 17132 20080 20242 21655 21421 21601 22103 21454 21545 31527 27559 26246 24928 25203 23954 24320 23536 24306 23600 23861 23736 23367 23228 23431 23410 23572 22778 23912 22538 23636 22412 23896 22457 23331 22528 23403 22807 23013 23121 22830 22566 23185 22689 23280 22391 23568 22181 23256 22148 23257 22528 23068 22791 22720 22413 22838 22643 23111 22319 23280 22032 23175 21915 23413 22044 22961 22177 22997 22422 22699 22689 22772 22567 22725 22801 22565 22272 22601 22487 23017 22456 23277 21956 23184 21915 23350 21741 22949 21589 23349 21865 22864 22092 22958 22336 22616 22561 22545 22406 22513 22691 22416 22426 22652 22885 22821 22358 22972 22516 23043 22273 23272 22173 23096 22369 23230 22052 23104 21884 23873 21675 22979 21395 23621 
