# Supplementary material for: An Active Feature Selection Strategy for DWT in Artificial Taste
Source: Hindawi journal article supplement (doi:10.1155/2018/9709505), 2018-01-01
Supplement: f1 [file 9709505.f1.zip › oolongTea-hi-2.txt]

43524 43468 43473 43468 58 9214 19224 19975 22411 21310 22437 21957 22674 22103 22352 22472 22977 22555 23201 21969 23188 21893 23440 22151 22951 22592 22793 22432 22485 22849 22809 22426 23123 22356 23058 22297 23435 22215 23168 22102 23479 22460 22996 22642 22880 22640 22750 22906 22739 22576 22765 22997 22780 22620 22721 22985 22827 22470 22757 22980 22992 22502 23029 23197 22710 22587 22557 23259 22624 22688 22537 23248 22736 22392 22547 23437 22493 22536 22437 23384 22534 22559 22479 23456 22276 22444 22340 23503 22306 22598 22178 23511 22084 22739 22081 23664 22172 22457 22584 22931 22832 22387 22887 22841 22641 22439 22647 23117 22638 22647 22276 23340 22384 22519 22433 23387 22856 22433 22839 22917 23072 22313 23361 22340 23123 22777 22871 22677 22778 22777 22944 22814 22741 22761 23034 22742 22428 22742 22972 22848 22601 23023 22643 23031 22519 23320 22372 23050 22355 23385 22402 22900 22408 23239 22624 22913 22800 22807 22733 22743 22928 22761 22553 22623 22933 23008 22578 22743 22801 23189 22184 23218 22405 23132 22257 23416 22257 23032 22218 23492 22434 23112 22594 23018 48 15557 18413 19147 19191 19917 19662 20399 19703 20326 30166 25441 23333 24147 22988 23815 22740 23906 22440 23556 22512 23770 22316 23497 22375 23680 22432 23308 22588 23325 22631 23247 22927 23079 22476 23034 22802 22989 22439 23132 22697 23266 22296 23463 22258 23377 22102 23588 22322 23248 22065 23681 22291 23173 22196 23517 22483 23204 22277 23376 22522 23303 22328 23217 22557 22828 22496 23193 22560 23136 22630 22963 22756 23006 22618 23201 22558 23260 22620 23001 22651 22909 22810 22912 22621 23040 22872 22993 22538 22804 22853 22934 22416 22811 22899 22925 22403 22909 22784 23009 22326 22988 22774 22977 22432 22705 22918 22901 22423 22921 22808 23025 22425 23047 22608 23261 22478 22770 22970 22821 22487 22794 22866 23032 22528 22861 22798 22938 22358 22817 22866 22784 22500 22556 22959 22801 22640 22745 23005 22774 22680 22881 23088 22887 22676 22647 23024 22640 22710 22786 21979 23624 22030 23063 21741 23940 21776 23207 21893 23928 21856 23458 21975 23680 22139 23365 22311 23494 22230 23336 23008 22769 23083 22600 22428 22441 23312 22519 22509 22519 23439 22492 22796 22059 23705 22117 23201 22359 23296 22475 22995 21970 15937 20708 20747 20885 20813 21859 21001 21256 20788 39764 24288 24096 22521 24142 23121 23180 23600 22887 23442 22508 23335 22444 23604 22565 23408 22311 23073 23077 22857 22716 22663 23092 22880 22946 23100 22887 23471 22428 23100 22425 23301 22665 23104 22555 22839 22983 22752 22689 22753 22793 23172 22520 23017 22138 23601 22253 23283 22382 23190 22756 22900 22733 22870 22851 23031 22588 22993 22246 23461 22240 23196 22036 23568 22218 23153 22408 22734 22889 22820 22626 22945 22852 23153 22532 23099 22264 23569 22183 23264 22168 23414 22543 23175 22363 22893 22826 22917 22423 22920 22528 23345 22426 23111 22206 23534 22115 23221 21996 23653 22171 23433 22432 23249 22753 23064 22408 22899 22842 23034 22457 23202 22097 23639 22136 23376 22225 23266 22632 22920 22401 22970 22727 23522 22099 23316 22203 23584 22342 23303 22318 22768 22835 22896 22598 23040 22392 23539 22240 23193 22490 22981 22739 22763 22542 23239 22452 23611 22044 23454 22358 23243 22617 22916 22377 23092 22273 23549 22053 23372 22330 22970 22822 22919 22578 23040 22153 23468 22300 23076 22377 22708 22994 23318 22309 23160 22359 22976 22887 22660 22637 23046 14249 21514 21056 21651 21387 21746 21536 22544 21354 22364 24813 23500 23312 23412 22540 23421 22693 23065 23255 22823 22740 23058 22045 23832 22912 22699 22907 22429 22933 23592 21903 23263 22497 22248 23642 22663 22539 23032 22006 23143 23657 22062 23017 22629 21888 23786 22621 22413 23040 22543 21859 23836 22664 22168 22962 22494 22792 23864 22056 22938 22588 22206 23108 23533 21982 23259 22246 22075 23713 22612 21841 23243 22249 22688 23833 22186 22784 22728 22856 22452 23488 22421 22944 22666 23144 22545 23332 22875 22702 22840 22813 22309 23210 23030 22704 22912 22877 22242 23248 22855 22661 22784 22935 22327 23124 22919 22768 22486 23096 22331 22929 22944 23111 22336 23191 22551 22699 22839 23349 22186 23135 22406 22833 22690 23545 22254 23272 22390 22945 22400 23520 22228 23181 22388 22822 22555 23510 22149 23313 22336 22855 22804 23261 22308 23364 22328 22853 22624 23492 22035 23373 22222 22928 22443 23669 22126 23145 22505 22816 22068 23552 22676 22807 22421 23208 22298 22950 22801 23228 22215 23333 22221 22930 22801 23340 22062 23376 21829 22742 22508 23477 22117 23330 22208 22861 22833 23380 22154 23385 22437 22720 22744 21728 21217 22382 21589 22276 21893 22868 21409 22839 26454 23586 22564 23794 22340 23301 22537 23303 22202 23560 22705 22852 22665 23140 22108 23528 22688 22951 22659 23314 22300 23523 22578 22749 22617 22940 22163 23434 22728 22716 22720 22962 22169 23191 22992 22855 22388 23079 22492 22759 22951 23096 22278 23224 22458 22380 23152 23449 22012 23161 22458 22076 22848 23785 21756 23079 22926 22368 22080 23883 22375 22570 22981 22401 22120 23833 22628 22282 23037 22616 21674 23656 23270 22034 23064 22649 21884 23617 23001 22070 22994 23010 21873 23838 22655 22177 23143 22508 21893 22935 23842 22220 22888 22628 22978 22481 23561 22532 22791 22677 22961 22220 23159 22906 22679 22776 22965 22900 22608 23044 23284 22311 23069 22496 22683 22552 23432 22336 22946 22533 22790 22324 23387 22708 22716 22749 22980 22276 23186 22926 22903 22487 23118 22224 23223 22791 23271 22116 23265 22364 22741 22583 23381 22162 23296 22343 22882 22518 23562 22020 23108 22226 22903 22261 23578 22115 23161 22424 23081 22137 23625 22362 23061 22480 23472 22016 23466 22528 22885 22493 23160 22042 23079 22727 23061 22233 23191 22183 23184 22771 22974 22201 21618 21857 22396 22458 23062 22056 23015 22144 22624 22264 24014 22383 23033 22600 23644 22040 23545 22417 22876 22523 23115 22039 23471 22645 22852 22513 23071 22360 22962 22836 22937 22503 23018 22410 23053 22857 23216 22247 23193 22434 22887 22520 23424 22295 22912 22467 22812 22304 23401 22920 22762 22555 22926 22167 23008 23456 22441 22536 23066 22132 22738 23647 22476 22389 23032 22196 22272 23598 22791 22008 23264 22391 22119 23364 23627 21859 23054 22510 22238 22573 23823 22038 22629 22740 22383 22510 23866 22561 22447 22912 22562 21807 23292 23432 22440 23156 22492 22626 22717 23278 22240 23108 22515 22711 22664 23308 22506 22818 22759 22885 22316 23253 22689 22607 22618 22833 22055 23174 22857 22724 22612 23065 22324 23008 22893 22832 22539 23161 22265 23347 22774 22722 22461 23111 22169 23050 22850 22889 22633 23090 22449 22880 22761 23153 22135 23275 22402 22997 22816 23254 22189 23236 22191 22680 22634 23473 22119 23194 22433 22912 22277 23593 22358 22964 22504 23079 21952 23410 22622 22953 22556 23080 22068 23252 22759 22849 22340 23144 22256 22839 22976 23005 22272 23078 22144 23317 22712 23174 22292 23554 22344 22855 22747 23319 22127 23356 22477 22705 22769 23297 22117 23200 22454 23164 22265 23470 22567 22791 22719 22483 22203 23357 22720 22709 22520 23120 22550 22883 22899 23009 22403 23068 22417 22405 23214 23048 22183 23264 22649 22218 23451 23356 21773 23050 22483 22321 22472 23823 21915 22983 22469 22118 22988 23565 21740 23192 22471 22042 22450 23820 22501 22503 22938 22368 22098 23856 22636 22198 23036 22621 21960 23033 23232 22317 23108 22435 22672 22912 23318 22198 23020 22507 22505 22898 23004 22352 23033 22530 22528 22855 23248 22224 23122 22452 22932 22528 23447 22320 22987 22730 22439 22149 23463 22725 22903 22436 23296 22289 22682 22840 23356 22164 23292 22380 22892 22353 23500 22364 22980 22553 23195 22262 22855 22706 23357 21983 23296 22219 22941 22196 23507 22416 22842 22377 23188 22646 22806 22631 23399 22016 23313 22285 23100 22097 23523 22548 22807 22565 23057 22215 22722 22825 23368 22016 23319 22348 22977 22147 23584 22513 22900 22528 23215 22213 22882 22721 23506 22305 22940 22561 22986 22072 23050 22812 23028 22267 23207 22396 22740 22314 23470 22545 22826 22468 23154 21767 22683 22727 23345 22190 23031 22592 22708 21778 23425 23400 22523 22145 23272 22428 22242 22567 23934 22503 21946 22752 22970 22385 22043 23156 23689 21926 22489 22898 22512 22057 23162 23814 22469 22098 10485 17427 18161 20042 20971 19289 20072 20589 20168 43468 27202 24699 23363 23376 23245 23296 22950 23147 23352 23332 22554 23272 22717 22769 22777 23645 22579 18421 20696 21290 20725 21664 21805 21648 21232 22042 36648 24736 23473 24163 22700 23257 22871 23466 22549 23191 23049 23755 22320 23397 22650 23568 22188 48 20695 21808 21144 22407 21469 21915 21671 22809 21598 28339 23626 23664 22477 23424 23033 23713 22233 23500 22540 23233 22336 23692 22523 23068 22700 23149 15264 22354 21976 22272 21934 22692 21697 22675 22421 22848 23987 23838 22640 23026 22917 23664 22501 23111 22669 23141 22277 23224 22969 22935 22568 23289 22679 21059 22471 22925 21890 22933 22293 22471 21652 23349 22784 22872 23144 22965 22098 22826 23744 22477 22454 23385 22500 22262 22913 23987 22666 22062 23152 22813 22156 22837 23767 22766 21896 23277 22618 22304 22006 23724 23270 22020 22925 22647 22661 22606 23421 22625 22825 22744 22902 22605 22677 23035 23252 22396 23048 22600 23286 22225 23255 22973 22855 22328 23335 22375 22831 22441 23469 22615 22844 22633 23104 22084 23362 22843 22989 22395 23179 22456 22920 22870 23280 22130 23382 22311 22784 22584 23595 22158 23136 22528 23079 22037 23296 22878 23122 22132 23392 22296 22832 22572 23681 22080 23125 22568 23028 22061 23003 22897 23272 22173 23261 22347 22971 22194 23666 22572 22833 22521 23229 22178 22964 22688 23274 22024 23210 22506 22993 22185 23401 22718 22731 22588 22959 22279 22882 22877 23353 22215 23084 22546 23371 21906 23244 23067 22593 22264 23351 21720 22315 22243 23881 22768 22032 22905 22675 21916 22929 23717 22601 21984 23208 22442 22000 22995 23814 22982 21934 22786 22799 22468 22138 23456 23488 22122 22470 23004 22508 22648 22679 23517 22480 22637 22778 22930 22436 22513 22871 23373 22592 22714 22631 23104 22304 22624 22658 23496 22194 22933 22704 22918 21998 23287 22884 23008 22332 23307 22385 22892 21968 23370 22715 22949 22468 23141 22460 22900 22714 23543 22001 23147 22455 23144 22036 22844 22700 23408 22048 23073 22537 23105 21988 22938 22808 23416 22049 23064 22505 23090 22064 22977 22832 23434 22210 23144 22374 23196 21972 23472 22537 22882 22409 23212 21651 22905 22740 23533 22164 23057 22588 22740 22150 23319 22851 22717 22418 23136 22560 22790 22796 23385 22410 22811 22592 22951 22210 22912 23032 23082 22132 23130 22614 22304 22292 23913 22330 22173 22905 22778 21851 22696 23638 22631 22097 23235 22446 21972 23392 23767 22164 22296 23054 22994 21810 23209 23622 22148 22289 23096 22486 22210 23246 22844 22737 22638 23059 22472 22624 22841 23298 22281 23031 22695 22802 22304 23399 22608 22764 22673 22935 22151 23000 22784 23213 22240 23136 22458 23147 22199 23516 22662 22827 22486 23223 22540 22724 22773 23280 22011 23169 22422 22982 22173 23592 22323 22989 22568 23063 21959 23243 22784 22988 22276 23162 22449 22681 22530 23454 22028 23172 22285 23066 22180 23577 22254 22945 22499 23045 22112 23141 22848 22991 22290 23365 21888 22776 22690 23308 21956 23298 22391 22989 22357 23479 22404 22976 22468 23125 22217 23438 55 16323 18652 19884 19943 20896 20085 20505 20362 20625 32425 25606 23786 23275 23193 23336 17911 21152 21933 21287 21031 21992 21121 21347 22644 38596 23880 24103 23165 22529 23095 19585 20622 22090 21719 21557 21504 23216 21911 21876 22343 24373 22966 24455 23168 22585 16224 21709 22000 22420 22765 21805 22804 22163 22130 22752 24791 23055 23428 22828 22947 23328 22642 22089 22924 22322 22487 22622 23140 22089 22969 24354 23033 23077 23511 22295 23495 22538 22904 22742 23424 22151 23296 22567 23161 22571 23650 22198 23273 22456 23179 22211 23656 22240 23158 22433 23176 22325 23605 22221 23220 22391 22952 22567 23484 22007 23413 22350 22900 22849 23332 22126 23190 22292 22712 22727 23415 22213 23280 22313 22963 22852 23088 22122 23336 22311 22800 22839 23200 22301 23172 22341 22898 22968 22755 22615 23153 22395 22806 23025 22887 22413 23045 22130 23224 22871 22755 22645 22923 22028 23247 23295 22208 22913 22873 22041 23975 21934 22893 22584 21840 22601 23820 21895 23098 22458 21961 23323 23096 21891 23248 22405 22436 23548 22969 22283 22951 22115 22885 23646 22188 23175 22452 22706 22949 
22212 21596 22649 21225 22399 21800 22299 21563 22199 21613 22348 21479 21879 21291 21948 21549 22294 21956 22583 22007 22549 21797 22219 21367 21876 21517 22181 21785 22186 21748 22037 21663 21795 21069 21177 21067 21964 21815 21980 21875 21527 22040 21659 22135 21324 22400 21378 22160 21321 22388 21303 22193 21277 22425 21446 22109 21549 22304 21635 22086 21766 22154 21824 22087 21543 22414 21696 22116 21588 22307 21671 22535 21733 22232 21591 22390 21649 22305 21595 22152 21591 22361 21635 22199 21467 22331 21626 22212 21485 22373 21641 22189 21305 22551 21521 22140 21660 22257 21722 22193 21748 22161 21848 22217 21796 22240 21592 22205 21640 22391 21638 22665 21568 22432 21609 22251 21828 22188 21671 22158 22072 21956 21781 21832 21975 22051 21723 21776 22080 21835 21655 21883 21976 22081 21446 22201 21788 22263 21463 22401 21512 22407 21465 22684 21205 22361 21249 22618 21520 22141 21430 22571 21669 22292 21765 22136 21792 21995 21975 21848 21633 21850 21993 21924 21505 22264 21792 22198 21571 22401 21500 22329 21451 22605 21485 22081 21465 22364 21617 21995 21819 22040 21754 21841 53 52 2745 6908 8817 10114 10350 11583 11463 12407 43292 30690 25735 24645 22743 23706 21991 22912 21491 23329 21477 22519 21233 23041 21488 21893 21714 22172 22167 21769 22583 21281 22001 21257 22567 21828 21591 21409 22116 22183 21503 22366 21362 22421 20999 23076 20890 21883 21191 22930 21136 22033 21231 22542 21504 21734 21734 22038 21927 21703 22451 21491 21998 21561 22388 21565 22121 21570 22437 21271 22075 21265 22781 21185 22183 21478 22289 21487 22137 21441 22345 21387 22135 21436 22367 21404 22135 21444 22412 21549 21896 21371 22253 21683 21810 21568 22151 21780 21844 21784 22100 21821 21989 21689 22257 21735 21930 21820 22177 21850 22008 21748 21991 21747 21997 22000 22266 21707 22043 21649 22221 21718 21873 21742 22201 21801 22416 21728 22186 21613 22039 21633 22477 21292 22074 21149 22567 21379 22076 21124 21888 20704 21526 20610 21861 20736 21584 20654 22016 21085 21639 20922 21505 21396 21446 21106 21238 21544 21301 21018 21250 21533 21305 21191 21281 21520 21307 21175 21233 21523 21514 21297 21603 21294 21587 21153 21009 21265 21625 21303 21841 21207 22026 20950 21546 20668 22075 20769 21696 20817 22044 4159 14343 12055 15094 14850 16140 15980 17095 16459 17079 29072 24578 22967 22173 21825 21760 22007 21752 21531 21879 21079 22084 21036 21779 20921 22098 21026 21832 21037 21525 21504 21484 21207 21428 21658 21588 21326 21618 21026 22034 21031 21773 21142 21908 21210 21643 21151 21426 21616 21262 21442 21397 21271 21875 21187 21543 20941 22057 21078 21577 21461 21505 21716 21280 21401 21312 21445 21585 21346 21497 21040 21895 21004 21640 21010 21564 21453 21553 21240 21165 21683 21255 21456 21334 21396 21466 21253 21572 20818 22233 20812 21712 20992 21655 21651 21230 21216 20694 22348 20802 21728 20961 21805 21540 21254 21181 20940 22435 20672 21648 20518 22429 21079 21659 21352 21256 22378 20686 21553 20645 21717 21908 20891 21621 20467 22363 20924 21714 21211 20896 22434 20610 21824 21601 20820 22563 20564 21817 20970 21608 22061 20990 21378 20604 22281 21335 21469 21131 21015 21623 21617 21235 21553 20795 22074 21021 21763 21199 21229 21687 21294 21339 21490 21085 21945 21008 21618 21301 21097 21703 21512 21256 21499 20873 21722 21481 21175 21293 21369 21370 21693 21137 21649 21558 21376 21541 21319 21218 21451 20851 21888 21442 16848 18812 19651 19596 20603 19497 20519 19887 20162 20325 23936 21977 22360 21427 21858 21869 21604 21425 21641 20912 21985 21394 21504 21351 21536 21345 22103 20935 21870 21111 21511 21632 21746 21077 21655 20958 21788 21526 21381 21270 21655 20782 22085 21179 21536 21280 21563 21147 22013 21149 21567 21163 21535 21133 22120 20924 21807 21152 21280 21383 21818 20807 21905 21078 21504 21666 21505 21147 21654 21014 21449 21575 21404 21303 21675 20845 21816 21697 21293 21357 21633 20866 21575 21639 21373 21105 21782 21536 21280 21613 21940 20962 21873 21216 21404 21523 21783 20971 21745 21004 21405 21724 21665 20976 21769 21260 21253 21376 21911 20995 21557 21245 21428 21264 22068 21379 21321 21374 21754 20965 21961 21579 21307 21431 21504 20935 21789 21660 21268 21392 21472 20956 21732 21685 21249 21427 21414 20664 22148 21509 21049 21607 21348 20845 22401 21747 20674 21672 21301 20453 22203 22189 20565 21557 21511 20649 21505 22484 21176 20992 21676 21139 20679 21514 22467 20876 21366 21624 21056 20777 22659 21176 20955 21748 21127 20728 22424 21534 20658 21715 21272 20599 22292 21966 20771 21794 20911 20661 21944 21682 20953 18401 19696 20298 20701 21159 20128 20928 20483 20581 20923 23157 21645 21952 21526 21373 21371 21963 21162 21602 21417 21427 21056 22040 21422 21501 21364 21211 20992 22050 21071 21643 21316 21282 20895 21980 21328 21368 21351 21648 20793 21867 21459 21408 21405 21691 21007 21657 21548 21486 21105 21737 20933 21468 21686 21681 21030 21728 21234 21310 21585 21804 20771 21752 21045 21297 21382 22084 20940 21733 21128 21480 21167 22107 21027 21741 21273 21575 21142 22027 21287 21481 21346 22040 20911 22110 21133 21610 21217 21450 20919 22131 21026 21475 21143 21608 20914 22018 21166 21312 21347 21476 20811 21816 21615 21321 21196 21664 21029 21601 21632 21740 20904 21703 21088 21376 21449 22120 21145 21511 21264 21504 20843 21970 21544 21332 21374 21523 21025 21667 21657 21255 21320 21642 21169 21205 21728 21672 20996 21641 21185 21381 21473 21948 20986 21690 21288 21409 20861 22008 21700 21248 21530 21357 20645 21991 21991 20837 21579 21489 20647 21971 22268 20718 21545 21443 20899 21254 22563 21011 21144 21655 20978 21109 22460 21288 20811 21880 20701 20625 21848 22328 20523 21599 21425 20864 21361 22588 20755 21574 21362 20976 21007 21595 20912 20213 21481 20886 20900 21187 21584 20480 23520 21465 21687 21365 22060 21340 21355 21453 21437 21127 21975 21410 21233 21379 21479 20976 21638 21591 21345 21335 21669 21056 21668 21563 21272 21360 21581 21248 21198 21549 21797 20958 21700 21183 21356 21208 22080 20992 21526 21249 21486 20788 21881 21557 21451 21335 21507 20849 21724 21475 21460 21271 21679 21011 21847 21505 21469 21061 21610 21034 21514 21682 21518 21208 21767 21089 21280 21504 21837 20909 21858 21167 21437 21243 22016 20856 21826 21239 21444 21177 22133 21117 21384 21392 21232 20951 22058 21269 21380 21307 21639 20812 22003 21504 21399 21248 21701 20915 21490 21574 21452 21128 21686 20984 21376 21701 21747 20996 21656 21140 21124 21588 21881 21014 21670 21185 21264 21424 21927 20981 21710 21112 21187 21493 22032 20937 21747 21198 21044 21476 22092 21111 21330 21584 21111 20792 22679 21079 21236 21600 21021 21165 22487 21472 20696 21815 21305 20613 21671 22408 21094 21204 21596 20969 21176 22477 21577 20614 21850 21226 20535 22045 22074 20518 21693 21405 20620 21515 22537 21463 21276 21606 20960 21674 21603 21385 21438 21608 21067 21430 21762 21474 21179 21545 20931 21228 21620 21717 21092 21749 21672 21189 21593 21975 21104 21642 21275 21421 20985 22025 21211 21472 21303 21624 20783 21895 21495 21395 21213 21653 21129 21587 21644 21440 21014 21709 21232 21504 21623 21584 21056 21816 21130 21259 21363 21982 20826 21814 21063 21241 21488 21889 20810 21728 21159 21338 21529 21853 20916 21720 21120 21572 21166 22048 20935 21690 21208 21479 21198 22093 21040 21454 21525 21432 20872 22083 21320 21468 21285 21193 20932 22125 21232 21476 21255 21672 20896 22021 21353 21431 21431 21459 20977 21879 21568 21223 21370 21600 21160 21604 21831 21491 21136 21704 21196 21343 21203 21963 21056 21429 21372 21568 20740 21768 21660 21036 21504 21614 21030 20883 22301 22392 20988 21029 21623 21329 20544 22069 22224 20738 21071 21764 21130 20615 21364 22584 21319 20835 21827 21144 20556 21827 22504 21017 21072 21851 20539 20683 22058 22151 20883 20997 21704 21152 21273 21350 22085 20855 21480 21325 21762 20878 21839 21641 21222 21272 21581 21235 21378 21294 21991 21335 21223 21342 21615 21019 21363 21608 21728 20928 21636 21210 21433 20848 21725 21625 21645 20967 21795 21101 21322 21361 22075 21048 21515 21354 21601 20972 21581 21572 21962 20823 21872 21046 21650 20822 21920 21576 21481 21028 21695 21149 21387 21235 22069 20954 21664 21270 21717 20857 21523 10681 7097 10193 12960 12973 13683 14019 15060 14178 43345 34471 27320 24035 23684 23008 23198 21972 22822 21942 22647 21632 22845 22137 22138 21933 22287 0 6375 13561 15610 15707 17056 16753 17167 17047 18206 43364 29067 25224 24016 22611 22839 22581 22933 21867 22366 21457 21271 20525 21504 22429 21371 20838 13062 17796 18492 19087 20923 20306 19271 20311 20200 19795 24626 23756 22992 21316 21620 22080 21504 20788 21705 22604 21136 21323 21860 21158 21112 22277 21437 19008 19965 20609 19968 20968 20897 20536 20676 20944 20644 22860 22401 22106 21281 21932 21494 21398 21226 22202 21304 21324 21429 21578 20969 21808 21593 21653 20008 21253 20318 20937 21200 21563 20690 21163 21015 23289 21362 22233 21497 21431 21291 21715 20839 21815 21526 21880 20955 21719 21132 21504 21048 22022 21458 21327 21334 21601 20997 21429 21618 21975 20820 21495 21289 21671 20817 21925 21557 21319 21157 21692 21140 21450 21547 22091 20904 21553 21281 21664 20765 21671 21789 21556 21089 21656 21261 21253 21120 21897 21415 21289 21292 21553 21252 21266 21619 21691 21044 21786 21271 21305 21153 22086 20967 21312 21573 21340 20636 22341 21796 20652 21760 21299 20740 21276 22445 21450 20697 21800 21332 21101 20784 22478 21571 20681 21789 21273 20759 21046 22402 21689 20611 21307 21909 20644 21255 21479 21866 20825 21673 21344 21456 21001 21952 21709 21379 21255 21702 20866 21226 21402 21984 21006 21476 21244 21522 20953 21760 21438 21376 21137 21678 21130 21198 21335 22144 21226 21489 21392 21559 20890 21673 21639 21629 20811 21600 21130 21695 20931 22043 21450 21339 21253 21594 20919 21464 21604 21718 20952 21809 21197 21719 20877 21979 21455 21472 21207 21733 21111 21267 21314 22019 21124 21305 21304 21552 21031 21451 21399 21894 20978 21544 21351 21559 21005 21138 21331 22051 21144 21325 21357 21509 20926 21519 21723 21504 20958 21692 21211 21505 21133 21975 21661 21400 21103 21718 21221 20880 21357 22426 21217 20916 21706 21398 20642 21354 22528 21554 20501 21087 21714 21265 20575 21324 22414 22068 20439 21238 21697 20791 20571 20980 22279 22045 20619 21129 21811 21084 21239 21468 22065 21043 21381 21393 21479 20905 21821 21675 21511 21128 21635 21070 21249 21268 22068 21148 21499 21382 21640 20923 21559 21788 21399 21191 21832 21189 21511 21026 21946 21342 21305 21240 21627 21110 21367 21431 21913 20922 21762 21114 21572 20905 22148 21349 21317 21145 21557 20909 21549 21649 21632 21069 21834 21077 21549 21176 22071 21088 21392 21242 21529 20740 21619 21577 21565 21095 21683 21227 21211 21393 22179 21115 21566 21397 21641 20800 21812 21458 21377 21287 21591 21248 21276 21605 21831 21041 21614 21402 21474 20836 21781 21728 21389 21168 21655 21228 21189 21279 22134 21145 21347 21454 21812 20611 21419 22360 20933 21157 21697 21056 20856 22280 21847 20500 21726 21473 20894 21285 22599 21170 20593 21795 21340 20539 21658 22435 20775 21213 21723 20883 21032 22432 21730 21227 21354 21549 20891 21737 21584 21549 21104 21623 21549 21131 21631 21946 21001 21511 21223 21543 21345 21976 21031 21591 21233 5734 6227 12088 13024 14631 14426 15064 14881 16233 15295 42592 29507 25639 23351 23832 22834 8065 14144 16397 16530 17813 17773 17981 17665 18442 43072 29184 25339 24235 22615 23224 9519 15898 17963 19116 18508 19462 19053 19587 19301 43348 27656 25113 23247 22999 22421 11845 17248 19522 19835 20240 19773 21105 20055 20792 20280 27730 23680 23897 22294 22745 14478 19770 20293 21701 21067 21115 21160 21568 20769 21897 25657 23351 22571 23023 21836 22858 22048 22066 22056 22700 21232 22480 22696 21687 22055 22240 21143 22351 22828 21431 21677 22071 21261 22001 22839 21564 21885 21994 21056 22423 22555 21218 22216 21824 20975 22853 22121 21325 22298 21735 20994 22854 22407 21632 22368 21149 21746 22193 21977 21648 22016 21792 21692 22173 21944 21648 22093 21719 21803 22119 21927 21745 21978 21416 22269 22253 21925 21739 22053 21397 22250 21993 21880 21865 22011 21232 22414 21789 21931 21829 22165 21316 22599 21485 22134 21540 21934 21771 22435 21253 22365 21524 21797 21933 22376 21323 22252 21511 21980 21956 22145 21578 22390 21332 22144 21966 21812 21716 22023 21288 22432 21537 22082 21480 
21395 22027 21572 21444 22063 22192 22134 22064 21984 22006 21605 21682 21332 21623 21544 21933 21769 22101 21604 21711 21539 21796 21547 21696 21305 21705 21792 22290 21963 22320 21815 22024 21348 21504 21271 21910 21692 22066 21539 21979 21377 21961 21409 21702 21163 22016 21877 22426 22016 22168 21517 21708 21184 21740 21511 22063 21585 22021 21401 21728 21365 21528 21249 21848 21736 22363 22008 22528 21783 22084 21207 21649 21288 22005 21685 21248 21973 21479 22389 21330 22027 21400 22277 21365 21928 21527 22242 21351 21920 21525 22224 21432 21624 21831 21914 21392 21971 21504 22504 21060 22027 21159 22637 20937 22093 21301 22613 21040 22030 21504 22379 21155 22074 21301 22440 21100 21995 21141 22677 20892 21863 20996 22698 21057 21730 21184 22249 21504 21796 21481 22144 21564 21645 21625 21857 21811 21777 21932 21735 21783 21548 22045 21504 21654 21478 22030 21818 20974 21952 21559 21916 21634 22187 21412 21975 21335 22256 21460 21797 21415 22064 21690 21685 21761 21814 21728 21921 21928 21610 21761 21483 22062 21602 21551 21920 21708 21869 21563 22230 21455 22005 21284 22336 21257 10553 15952 18391 18628 19072 19310 19091 19342 19408 43325 24916 22465 21850 22232 21732 21568 21610 21878 21765 21504 21664 21856 21941 20826 22257 21355 22096 21379 22316 21121 21985 21278 22221 21499 22247 21817 21796 21680 21794 21889 21608 21677 21590 21874 21682 21392 21832 21660 22023 21465 21925 21556 22088 21584 22267 21276 22108 21285 22368 21232 22020 21070 22409 21115 21959 21083 22435 21248 21892 21118 22441 21301 21899 21282 22346 21235 21929 21138 22296 21287 21958 21113 22343 21298 21945 21209 22225 21357 21879 21477 22192 21610 21874 21634 21943 21650 21984 21688 21808 21585 21916 21792 21633 21619 21463 21687 21760 21639 21847 21812 21703 21686 21720 21950 21546 21767 21879 21857 21804 21664 21964 21815 21735 21795 21955 21920 21752 21734 21736 21919 21790 21730 21839 21423 22112 21588 21850 21511 22296 21521 21815 21222 22361 21433 21814 21094 22551 21180 22053 21242 22528 21236 22050 21855 21971 21944 21769 21367 21528 22313 21326 21569 21207 22580 21171 21821 21116 22680 21140 21820 21175 22573 21165 22101 21252 22406 21261 22199 21511 22454 21265 22055 21655 21396 22459 21220 21752 20837 22856 20852 22139 929 19446 18869 20488 19575 21316 19672 20955 20064 21191 28198 23031 21780 21480 22647 21145 21924 21442 22243 21415 21931 21626 21587 21957 21581 21737 21489 22088 21680 21857 21773 21636 22077 21467 21793 21365 22293 21581 21837 21637 21659 22178 21585 21749 21571 21960 21785 21847 21742 21392 22272 21380 22037 21314 21928 21770 21713 21578 21528 22052 21573 21864 21747 21240 22295 21403 21968 21470 22229 21559 21991 21511 21871 22017 21620 21846 21912 21877 22084 21559 21943 21266 22366 21252 22050 21384 22166 21550 21953 21487 21876 21947 21665 21644 21923 21753 21953 21553 21912 21288 22430 21299 22092 21273 22359 21357 22135 21440 21925 21864 21861 21576 21687 22033 21793 21709 22090 21525 22291 21354 22139 21431 22076 21669 21799 21481 21578 21895 21774 21603 21933 21320 22457 21304 22166 21447 21703 21870 21614 21712 21943 21701 22289 21397 22021 21272 22422 21432 21866 21568 21777 21784 21930 21483 22107 21120 22350 21383 21947 21448 21664 21911 21902 21580 21924 21262 22341 21576 21913 21726 21827 21760 22185 21387 22118 21506 22008 21897 21634 21687 21945 21643 22276 21324 22005 21453 21611 21936 22107 21402 22040 21536 18256 20544 20687 20829 21040 20368 21644 21146 20969 36022 23283 21728 22352 21248 22133 21596 21632 21852 22052 21309 22103 21669 21788 22357 21444 21826 21770 20937 22856 21133 21842 21546 21376 21771 22695 20750 22295 21369 21224 22598 21762 21161 22152 21124 21798 22616 20982 21899 21738 21252 21851 22528 20992 21827 21712 20804 22912 21797 21150 22035 21586 21159 22923 21185 21765 21680 21184 21833 22582 20838 21943 21655 20947 22227 22408 21186 21828 21788 21312 22107 21801 21611 21831 21781 21273 22073 22108 21744 21749 21815 21705 21520 22093 21616 21603 21912 21648 21636 22120 21708 21744 21920 21653 21578 22112 22004 21369 22136 21612 21569 21890 22235 21367 22043 21560 21694 21492 22246 21492 21760 21749 22152 21365 22328 21633 21670 21696 21802 21249 22293 21725 21706 21803 21137 21385 22397 21468 21927 21669 21750 21605 22348 21260 22084 21555 21972 21342 22437 21413 21852 21619 21982 21143 22317 21665 21664 21679 21899 21284 22094 21987 22020 21286 22160 21538 21721 21803 22264 21196 22121 21388 21745 21609 22356 21217 22050 21520 21871 21271 22452 21426 22047 21612 21905 21530 22394 21320 21981 21593 21826 21427 15848 20376 21481 21242 21924 20965 22164 21108 21708 21396 24103 21474 22407 21809 21746 21784 22022 21251 22205 21952 21762 21472 22006 21565 21888 22071 21774 21702 21952 21209 22112 21913 21760 21514 22043 21423 21736 21917 21719 21480 22064 21751 21540 21931 22091 21306 22112 21504 21607 21636 22392 21248 22069 21588 21643 21459 22824 21340 21505 21821 21854 20978 22836 21687 21361 21979 21836 20846 22293 22284 21024 21997 21795 20731 22275 22505 21017 21965 21993 21252 21588 22660 21545 21346 21888 21213 21737 22715 21143 21734 21831 21126 22126 22448 21133 21659 21952 21226 21687 22582 22043 21344 21919 21716 21309 22150 21952 21623 21724 21756 21659 21699 22149 21755 21596 21957 21671 21562 21694 22174 21606 21696 21857 21898 21320 22117 21740 21600 21789 21812 21268 22119 21984 21736 21584 21833 21481 21559 21970 21959 21317 22077 21523 21675 21891 22377 21423 21916 21715 21651 21336 22315 21483 21764 21687 22297 21296 22352 21699 21715 21647 21899 21180 22359 21643 21664 21656 21941 21221 22096 21847 21707 21775 21963 21334 22028 21912 21846 21280 22089 21804 21664 21815 22217 21168 22156 21408 21564 21815 22113 21292 22184 20689 21532 21381 22198 21216 21736 21615 21120 21229 26274 22027 21905 21602 21963 21243 22021 21966 21846 21563 22048 21462 22020 21993 21921 21208 22141 21521 21604 21857 22264 21275 22109 21465 21504 21943 22307 21424 21929 21733 21579 21179 22331 21772 21655 21714 21895 21210 22142 22152 21978 21297 22112 21489 21195 22384 22129 20997 22201 21434 21008 22363 22436 20764 22233 21427 21187 22087 22562 20831 21999 21664 21239 21836 22871 21549 21447 21999 21539 20977 22713 21859 21080 22039 21607 20935 22540 22424 20961 21993 21799 21346 21641 22621 21508 21809 21748 21682 21506 22364 21594 21618 21910 21797 21399 22101 21849 21524 21910 21859 21559 21972 22188 21625 21686 21905 21557 21616 22105 21940 21506 22023 21296 21504 21968 22119 21389 22169 21564 21600 22016 21952 21406 22101 21426 21536 21943 22122 21381 22048 21435 21728 21743 22309 21197 22041 21456 21668 21856 22318 21235 22198 21458 21882 21456 22370 21562 21755 21688 21921 21264 22213 21811 21654 21766 22065 21413 21915 21988 21986 21343 22119 21218 21886 21840 22133 21248 22178 21424 21664 21931 22293 21129 22199 21453 21651 21744 22411 21312 22131 21444 21799 21672 22440 21301 22059 21554 21944 21492 22355 21359 21848 21638 21813 21328 22128 21839 21608 21642 21976 21377 22007 21992 21803 21415 22103 21479 21624 21831 22254 21226 22056 21489 21628 21672 22631 21041 22037 21688 21287 21709 22771 21466 21233 21923 21760 20900 22776 21727 21238 22001 21384 20938 22868 21606 21403 21943 21753 21156 22553 22371 21013 21968 21697 20980 22401 22328 21006 21863 21798 21084 21591 22256 21619 21864 21717 21751 21521 22311 21564 21764 21768 21728 21679 22197 21582 21895 21848 21785 21595 22359 21666 21688 21784 22101 21297 22229 21857 21609 21811 21794 21461 22021 21994 21883 21273 22126 21517 21741 21685 22288 21396 21832 21697 21546 21315 22349 21836 21632 21667 21940 21440 21716 21627 22366 21329 21938 21666 21924 21191 22122 21862 21780 21443 22030 21493 21824 21486 22410 21392 21849 21698 21975 21165 22245 21914 21755 21491 22144 21878 21634 21603 22350 21444 21863 21673 21896 21120 22200 21932 21948 21391 22070 21431 21579 21721 22423 21664 21636 21678 21927 21520 21749 21915 22201 21336 22024 21635 21974 21144 22299 21970 21724 21504 22087 21595 21752 21609 22332 21676 21784 21794 21890 21222 21764 22583 22108 20802 22163 21647 21712 20951 22604 22397 21158 21212 22375 21413 21128 21395 22948 21661 21104 22084 21532 20934 22101 22607 22376 20721 22087 15063 18372 18811 20884 19704 19065 20141 19886 19715 34375 24529 22103 21690 21732 21896 21019 21427 21991 22172 21453 21786 21872 22135 21335 22192 21803 1755 19136 20405 20265 20425 20993 21027 20395 21013 20744 27595 22405 22633 21914 21696 21560 22034 21475 21523 21660 22481 21480 21708 21789 21920 21355 21916 14405 20655 20200 21325 20873 21225 20663 21698 21207 21127 24305 22628 22007 21728 21749 22492 21239 21892 21645 21921 21072 22123 21768 21715 21575 21942 21479 18892 21223 21453 20914 21815 21177 21304 21506 22155 41348 23228 21886 21956 21259 22365 21562 21664 21689 21921 21408 21655 21976 22003 21379 22114 21485 21847 20679 22075 21139 21799 21536 21800 21141 21767 22250 25557 21617 22197 21413 21204 22297 22328 20698 22184 21799 21449 21031 22955 22300 20971 21496 22034 21749 21191 22443 22520 20904 21765 21894 22055 20839 21839 22684 21497 21084 22100 21766 21305 22081 22022 21538 21792 21969 21568 21451 21756 22280 21716 21606 21776 21751 21536 21685 22039 22000 21385 21940 21597 21738 21412 22146 21895 21623 21705 21965 21604 21750 21905 22094 21333 22097 21550 21511 21806 22375 21248 21969 21590 22033 21371 22355 21520 21648 21651 21984 21419 21783 21940 22016 21254 21987 21456 21936 21447 22425 21495 21780 21657 22038 21347 21721 21793 22352 21371 21877 21597 21952 21111 22313 21810 21749 21499 22169 21339 21622 21591 22311 21410 21788 21812 21892 21147 22088 21952 21832 21427 22067 21463 21514 21729 22331 21493 21673 21747 21891 21336 21713 22062 22165 21000 22119 21543 21510 20899 22380 22311 21120 21440 22075 21121 21189 22467 22215 20797 21997 21712 21458 21271 22893 22324 21277 21095 22333 21367 21026 21856 22886 21519 20997 22028 21641 21607 21458 22228 21879 21609 21607 22080 21709 21587 21640 22272 21922 21538 21554 21900 21581 21609 21591 22261 21690 21648 21815 21774 21467 21762 21986 22082 21317 22048 21613 21891 21336 21912 21984 21926 21294 22075 21513 21782 21680 22380 21504 21680 21644 21937 21447 21664 21687 22361 21381 21724 21792 21988 21355 21700 21716 22357 21257 21815 21557 21965 21191 21577 21767 22394 21385 21755 21621 21927 21302 22165 21947 21984 21337 22184 21338 21721 21536 22404 21618 21702 21691 21876 21431 22064 21980 21933 21394 22152 21463 21647 21621 22390 21725 21575 21614 22044 21730 21548 21835 22268 21221 21931 21765 21760 20803 22537 22219 20953 21577 22080 21653 21101 22209 22609 20702 22104 21687 21541 21504 22896 21846 20965 21841 21897 21181 21517 22713 21991 20846 22168 21543 21207 21733 22119 21705 21463 22060 21633 21725 21717 22205 21701 21635 21917 21689 21406 22080 21922 21512 21664 22109 21593 21581 21920 22210 21473 21684 21766 21755 21320 22050 22033 21748 21408 22101 21488 21671 21632 22295 21389 21721 21792 21914 21148 22231 21937 21725 21585 22008 21291 21667 21900 22154 21244 22119 21498 21703 21306 22475 21507 21794 21610 21963 21131 22305 21859 21657 21687 21980 21397 21674 21985 22215 21210 22177 21466 21920 21568 22391 21371 21840 21650 21849 21135 22331 21716 21664 21768 21815 21180 22210 21831 10213 17882 19473 19290 20495 19936 19892 20084 20280 19709 26893 22958 22024 21464 22071 158 18775 20890 20728 19946 21200 20576 20321 21109 21808 27044 22837 22105 21687 20964 22854 19195 20053 21239 21072 20227 21619 21965 20480 21488 30620 22178 22676 22721 21048 22035 18760 20692 21159 21941 21167 21557 21509 21306 21465 21874 22696 22147 21892 21681 21884 18766 20960 21704 21408 21623 21420 22112 21216 21593 21511 22695 21803 22354 21376 21821 21652 22016 21433 22385 21377 21668 21677 21846 21280 22404 21739 21686 21678 21833 21124 22168 21697 21618 21686 21864 21184 22187 21667 21668 21660 22145 21296 22377 21368 21891 21498 21777 21544 22401 21396 21909 21559 21923 21447 22321 21344 21946 21332 21767 21709 22373 21263 21945 21497 21891 21609 22352 21304 22071 21472 21568 21858 22065 21323 22029 21520 21545 21847 22150 21154 22099 21924 21708 21959 21713 21507 21885 21399 21360 22450 21672 21300 22064 20978 22510 22059 21051 22117 21749 20891 22716 21859 21092 22064 21550 21335 22864 20963 21901 21575 21078 22375 22788 20941 22144 21393 21045 22595 21772 21671 21779 21685 21775 22136 
41956 38992 33696 42096 39541 40468 40105 39091 38285 38701 34240 34752 41034 34664 33121 37683 35885 39542 34155 35399 33181 35920 33399 34781 40842 35427 35872 41255 38381 41689 36757 38526 41415 32792 40406 37594 35152 38971 33376 38233 41559 38285 41971 35421 39533 38439 37267 42908 38579 40239 33255 35116 39425 35824 32913 39130 33888 38445 41975 35670 41616 33260 39968 36864 35547 42330 38843 33317 35976 39216 40205 34614 40521 38790 35131 38677 33974 37176 33936 32624 41945 37100 37444 41588 36852 38607 41209 34912 42968 41216 35884 37284 37492 35712 38082 33219 41895 43826 42853 37259 37484 41804 35217 41573 36292 43276 37147 34748 33016 38098 36832 41923 39381 41027 43163 39172 38707 39336 35347 36481 37104 37494 35528 38155 35526 39452 41335 32791 35906 42752 40015 33768 34445 34272 36737 36368 35826 37689 35772 36065 33357 38828 32664 34396 42600 39040 36564 37751 37800 33664 37401 34240 40440 42100 38577 41446 41319 42708 36471 42123 39152 35194 34944 35545 36359 35337 37415 37611 34214 35533 42852 39460 34092 33479 37239 35317 37125 33686 40807 42900 38912 40688 41949 40587 29272 35544 40662 32966 37261 40352 38054 40613 41202 41883 38557 43304 37136 40925 35684 33384 33997 37066 35783 32519 34326 36644 37837 35984 41170 41810 39546 41728 42000 39109 38400 40773 41163 43364 41504 36691 36084 34736 35944 37065 34064 34908 33792 36912 34864 41484 36717 34694 38593 42706 37904 33459 39150 33712 41383 40786 39856 40832 42355 40373 38656 38659 42772 39408 38277 38824 43080 40312 37316 39204 43191 41190 37623 40557 42240 40589 37892 39136 41511 41024 38215 39103 42240 40989 38106 40099 40966 41856 37532 42800 40612 34368 36934 34221 37856 34497 38043 35021 36076 33728 37376 35959 34177 34178 42593 35399 35458 34432 36772 36297 35276 34960 35248 37992 33388 35753 37234 36864 36292 34523 37975 36571 35713 36128 37929 37443 35808 35576 35505 37705 36241 35440 36822 42345 39724 33945 36705 32939 41194 33131 36355 40132 42437 42578 36672 38785 33920 39584 39124 40560 33383 40114 38968 37101 38178 37889 35872 41703 33238 41556 41459 33792 39943 34197 39453 36755 39072 35285 39040 36625 39737 34276 39524 39692 40320 42784 40794 40918 33168 43008 40640 39256 34826 41605 43608 40384 35955 35961 37104 36106 40103 28199 41177 35754 31752 32903 40720 34233 37288 38208 39948 43426 39648 36020 42627 35378 39219 37654 42261 41373 42389 38065 34465 33751 37879 33943 35549 42721 39560 34902 36759 35984 34211 39280 42851 36339 41616 41707 34144 36670 34369 34638 40137 33914 35700 33600 37809 36106 36868 35819 41512 41223 41751 39019 41038 37776 35886 35209 33669 32855 38679 33781 36816 35784 40274 41752 42262 38222 42855 41241 33856 38402 33030 37128 38439 34304 36677 37376 37220 39271 33738 37836 40371 42600 40439 39004 41692 40424 33691 37737 43117 37350 38053 34707 34393 37478 35920 37832 33414 37241 40638 43208 41144 39675 40679 42534 41924 40328 42280 37888 36984 36993 33656 34968 38555 36116 35392 39289 33195 41250 41680 40374 42532 39547 34945 36216 42796 34035 37248 36003 34052 37725 41024 43488 41145 40420 42675 35575 37144 34332 35058 37848 35238 41248 42055 38838 40529 43012 42502 37287 33463 35703 35889 37657 42960 40004 38930 42323 42041 38248 42407 34819 37479 37472 33818 37397 40529 42194 33914 37376 35672 36498 35511 40377 41975 39992 32842 38384 37376 34243 35024 37809 34587 41030 41348 38822 42699 34581 37496 39758 42041 38981 33120 38828 32537 34328 35895 37900 41292 34682 39198 37573 35338 41874 35575 41895 40265 40113 34183 33984 36745 38871 41186 39876 34924 35992 42182 42545 36700 35828 37028 37143 39269 36732 33349 41184 36129 35523 34939 41482 41925 40351 34493 35552 39409 40084 39085 36279 34472 37527 37440 35704 40117 37078 33222 37184 36546 35136 35399 37525 36264 39392 38875 33829 39409 38138 39720 35904 34737 39436 36737 34144 35891 37912 34779 37109 40924 42800 39909 36600 36081 40745 39904 36409 34276 36576 35988 40498 39408 39761 35712 35776 36486 35200 32714 39368 34198 33944 37275 34330 34135 39560 35420 35496 37344 34612 33625 39336 38624 41771 40130 34386 33422 36930 41132 41958 39191 33581 35080 42728 41426 43096 35808 35796 39856 41789 42049 34481 34688 34844 36152 40109 41621 35853 35201 36297 39202 41805 43072 43011 38032 34886 35728 34064 41977 40616 39424 33616 37949 41504 43260 42377 37123 34346 38275 39399 42000 34880 34450 35024 37329 40601 39728 38508 38540 40756 40147 33299 35288 36297 41269 40074 39975 41903 35904 34144 41971 40263 38992 32938 37125 40620 43296 42412 39360 34370 37175 33147 42469 41249 38633 34072 36304 42161 35122 41376 43048 40744 37651 37468 40116 39034 35388 41666 40952 42837 43029 36552 35656 35902 38528 40340 40968 37968 35694 42424 38882 33830 36839 39299 36101 35157 37691 40097 39629 37636 35563 32825 38772 42448 35816 37624 35562 42624 39200 36021 33130 37645 39562 41060 39687 32728 34041 34119 42401 40294 39351 33939 34406 42385 37014 41372 32907 36460 36941 37473 36936 35169 41378 38592 36762 36222 41410 41594 37961 38681 36249 35011 41105 44032 38194 38273 38552 40280 33941 34752 33251 41080 37184 40221 35813 35781 39310 35717 36650 39040 40037 43123 39534 34893 37688 40272 35291 34057 38840 41268 37970 35352 41024 40192 37921 34518 35399 35864 34712 35044 39912 36148 33968 37909 34967 33489 35062 40328 34292 34816 36761 37282 41008 39942 35851 33833 36071 36262 40349 40020 38306 35634 33579 36496 42791 33922 37944 38186 41112 39600 33169 34796 37110 42476 42645 37809 35432 34539 41056 42033 43219 35957 35118 41320 40824 42164 35409 35300 34649 37296 39744 42484 34841 34428 34435 37750 40216 39457 37024 35368 36049 38155 41309 38873 37494 36818 40408 39595 36344 34516 36420 40775 39543 40241 41950 33868 36405 39588 40896 40544 34456 33048 41441 40811 40123 35712 34416 38779 40473 43079 39031 37408 34002 38061 40624 38738 38315 36851 33677 38578 42653 38714 38573 37592 39962 40314 33098 33831 36700 41288 40864 39957 42800 32889 37792 41679 42220 37930 35688 33864 39650 42159 36096 34678 35171 37273 40070 40305 40105 38432 40816 39685 42965 40232 42512 40093 37747 40710 42496 37805 42429 43219 35388 40950 42418 40007 39604 33912 36000 38684 34654 40390 36809 37523 33568 42288 38992 33369 37333 35718 36930 38515 38980 34338 37024 33557 42592 37530 38512 36416 41265 34627 34645 32616 36074 35689 34819 32557 42088 34214 34057 37325 36217 41912 39787 36985 32957 37269 36972 33631 37960 40556 34584 34912 37228 33529 33922 39473 37870 32730 38516 40730 32768 37787 39925 41996 40512 33793 33712 38168 37830 42084 39810 42229 33296 37808 39853 41781 38958 42512 35615 35884 41613 40204 39004 42432 34957 36661 41851 40567 40790 42632 37496 42336 42535 33859 35851 34936 37416 40240 40929 36560 34570 35688 39005 42119 37853 38370 38344 41640 40104 40234 37554 36570 39936 40167 40431 42153 34800 37734 41505 39297 40838 42796 34839 35479 42704 41072 40120 42444 36582 34740 42836 41182 39351 33498 37639 42880 42476 42048 36962 34394 36291 40966 39872 37043 34077 34304 38055 41552 38942 38467 36438 42125 39912 43048 34575 36585 41344 40448 39094 42936 34734 34647 34757 37977 38824 35075 40720 35574 36360 42619 40493 37799 35520 36482 36372 35734 40309 38652 41733 37281 37317 34169 41846 38192 35924 39280 33864 42240 38055 38021 35114 37448 42469 42098 38057 37157 36224 38656 34093 40964 34506 36826 35416 35883 32855 41573 33848 35534 35672 35305 35046 40520 34073 37237 36777 36034 34025 42176 34898 34875 35861 39458 40863 41156 37056 34188 36256 36027 42537 38832 38564 37456 40569 40128 33232 35671 34957 41111 41945 36751 35058 33293 40823 42416 36928 34119 34640 37661 42141 35540 34438 42297 41360 37906 34727 37430 39936 39948 37128 35893 42280 39040 43088 36596 42953 42987 41889 37065 35079 38260 39700 41296 37703 36043 42865 40040 37253 34248 33952 42075 42544 37348 34906 37095 38789 40631 37913 38005 42016 39436 42480 34149 35344 42831 34828 34165 34886 37660 32835 35634 37558 40693 41376 38720 34449 38073 39244 41741 38294 35579 32500 39264 34204 35655 34116 41810 35143 35851 36016 37050 40200 35811 34199 39538 35560 40102 34880 35014 37261 34420 42704 39698 40210 42692 42353 39244 41920 38374 34919 38618 39322 33302 36880 39536 34775 42269 34938 39227 36917 40300 35219 36258 34458 37617 39348 36660 34453 37975 45060 40039 35234 35424 37136 38109 42272 38768 40400 42771 36322 36928 40002 41516 40568 36544 27323 37801 41952 40644 42304 37704 38028 41928 38042 34801 46703 43099 35129 37443 34960 33360 38480 42800 33350 34520 43267 43043 35572 36172 37369 41620 37760 29394 33798 39623 41399 36523 40212 34306 34935 40006 39283 42944 34963 38577 35432 35768 43572 40807 37305 34640 37400 38346 39993 35877 35319 33731 37721 42915 36073 40267 42772 36970 36537 39680 40965 32902 39987 40588 41494 37622 37961 40512 42610 33877 34389 34969 37422 41816 34938 38093 38656 41695 39818 43147 37174 34343 39237 39312 36416 33012 35968 39200 35995 41171 45472 34592 40512 42249 40122 41675 42049 34721 40248 36481 42425 38368 38512 41655 37817 42936 38912 35840 39848 43320 44247 36936 35784 37210 39005 36226 36849 35334 42934 38936 39549 35904 40887 39384 38695 33224 35772 38060 33480 42370 36170 41176 35493 34055 35609 35883 32968 34840 38794 38444 41784 37968 34193 35542 41844 40080 37504 34500 35142 38160 34039 35691 37248 39581 41376 39620 33650 32792 36212 42486 40281 38240 34006 38464 41873 42439 33104 34144 34437 38062 42242 36339 37732 38359 40344 38550 42418 37839 42539 43160 43421 36181 34640 38698 41499 35664 36014 41912 42064 37425 34171 37634 39125 41816 36496 35816 43063 40554 41607 34584 33920 41623 42131 36327 36291 37104 39429 39397 37880 36572 42176 39394 42832 33216 35299 41945 43255 35152 35731 37154 41206 35448 39125 40320 37712 39904 33574 32672 36420 42452 42060 39017 42216 39616 39081 39881 43471 41216 35840 38580 35248 42338 40861 37995 41838 40944 39077 42183 42026 38109 36776 37610 33237 37432 38701 34531 34127 42248 41104 37505 34237 34115 38968 35505 33792 34165 40857 37677 33174 33158 37177 33920 34051 33876 41208 35297 34251 36406 35977 42677 35895 38232 39280 41153 38920 34444 37097 41207 37589 38202 37714 40922 39556 33043 35811 34700 42384 32865 34560 34379 37607 42503 34806 35049 42185 41912 35730 35910 38289 41675 35306 35236 42131 40592 36656 33513 38089 39976 33900 35777 42597 41992 36233 34332 37641 40931 40390 38187 38243 41371 40567 41491 35696 32972 42294 34453 35077 35116 37004 42360 39168 38432 37932 41736 40168 42880 35004 34262 42464 35886 33751 34178 38757 35509 33316 36583 41430 40403 37971 35856 35462 35495 33431 40777 37461 33768 38958 34647 38875 40694 34592 34536 39372 35278 33204 32359 37352 36824 37424 36658 37301 39864 33194 35529 38500 36264 40124 33584 39960 35752 39816 35400 42592 39333 34354 35506 35337 40745 35380 34272 37544 35118 41940 39322 37617 32832 34342 39661 34101 33763 37250 40620 42818 35189 35720 35952 40937 39010 38741 35812 41704 39792 42854 35203 34035 41436 42080 35712 35916 37454 39349 41200 37904 35674 33710 38446 40938 34960 37261 40074 40625 40057 43180 35591 40864 43732 33153 35877 34152 38054 39240 41635 37175 34665 35045 38251 41923 35097 38202 40912 40237 40416 42827 37653 33472 42542 42092 36763 34464 36737 39346 42149 35538 34488 35628 36464 39721 40739 36873 35660 35312 31525 39739 32329 36664 36420 38524 40588 35059 39024 38567 38596 42605 39574 19878 33865 36354 34769 37076 39734 33030 40760 39141 36267 40809 37193 39650 35277 37239 37065 39432 38360 40588 38460 40000 34434 38138 31646 42392 48745 40796 35296 35624 38107 38800 34328 34200 39402 37970 39800 33673 32677 40744 42816 37336 35381 39896 37270 34897 37200 34507 37059 35150 41701 34672 42002 39728 40068 34133 32824 35364 36284 42037 41645 36838 34496 38185 42351 42742 41799 34923 34946 36693 40407 42691 36065 34965 34944 36544 38912 40248 35210 34099 34904 36844 39521 40691 34925 34598 34604 39707 40756 42672 41872 37426 43058 36116 33200 42272 42002 37682 33702 37442 42514 41984 41441 38113 41219 36097 35368 42336 40872 38094 43089 37475 34205 41816 41072 39496 42643 33720 36704 39052 41298 38996 32922 33133 36736 39992 39414 39648 37584 35312 38071 35328 32722 37221 41993 41616 43307 35073 40679 39108 37606 43957 39488 38504 39846 35936 36577 35730 36935 38656 39024 33586 41186 37349 37441 37467 33856 38448 42604 36558 37237 39756 41847 38439 34356 35782 34862 35880 34972 36014 39872 
23209 22988 23197 23123 23642 23465 23522 23290 23296 23058 22950 22663 23030 22801 23236 23205 23421 23171 23196 22821 23179 22763 22916 22553 23062 22941 23671 23235 23627 23200 23373 22664 22949 22544 23189 22999 23405 22925 23479 22674 22577 22780 23047 22519 23106 23031 23664 23225 23604 22754 23125 22637 23100 22773 23392 22804 23371 22675 23116 22641 22880 22537 23063 23116 23620 23252 23645 23008 23428 22732 23012 22535 23198 22849 23421 22838 23084 22830 23165 22363 23096 23001 23520 23251 23256 22680 22883 22747 23300 23100 23249 22727 22929 22571 22677 22586 23383 23634 24008 23348 22935 22279 22495 23066 23506 23201 23005 23041 22725 22177 22746 23117 23968 23986 23685 22888 22551 22075 22311 22733 23363 23234 22961 22151 22513 22164 22743 23179 23259 23568 23137 23162 22499 22912 22849 23114 23047 23045 22944 22915 22756 22703 22582 23271 23175 23519 22991 23040 22440 22927 23156 22902 23328 23047 22976 23239 22999 23328 22881 23584 22658 23339 22758 23663 22689 23198 22585 23620 22774 23228 22957 23225 23133 22976 23257 23001 23015 22871 23292 23056 22921 23259 22872 53 6605 11799 11799 13505 13041 14137 13605 14164 13689 37049 27804 26439 25402 25415 24672 24375 24357 24272 24017 24135 24028 23888 23752 23784 23944 23802 23415 23788 23633 23923 23040 24128 23079 23913 22934 24151 22890 23741 22939 24039 23207 23601 23325 23552 23368 23398 23507 23360 23300 23420 23590 23274 23168 23240 23480 23418 22996 23417 23345 23512 23025 23428 23252 23468 22913 23527 23164 23504 22941 23638 23005 23623 22827 23756 23172 23368 22999 23572 23171 23430 23040 23638 22969 23539 22745 23697 22839 23701 22816 23865 22755 23545 22601 23859 22639 23433 22590 23781 22677 23391 22642 23739 22743 23403 22664 23815 22816 23302 22683 23657 22912 23321 22886 23592 23025 23315 22625 23710 22679 23301 22607 23671 22784 23287 22645 23604 22807 23216 22704 23625 22707 23365 22728 23610 22684 23365 22785 23569 22794 23476 22800 23673 22857 23488 23023 23675 22951 23381 22907 22711 23827 22728 23288 22631 23946 22548 23364 22746 23824 22709 23456 23045 23670 23008 23397 23466 23337 23344 23401 23043 22739 23988 22521 23084 22506 23996 22459 23159 22528 24083 22430 23393 22448 24064 22618 23634 22751 23507 23168 23363 22822 7789 14766 15231 15677 15698 17139 16230 16661 16187 17852 27879 26304 24783 25338 24121 24316 23904 23852 24096 23702 23836 23750 23826 23796 23601 23639 23344 24023 23085 23671 23120 23909 23371 23688 23264 23392 23703 23149 23363 23341 23548 23564 23205 23353 23030 23831 22976 23578 22950 23613 23402 23411 23256 23115 23562 23260 23373 23385 23069 23763 22935 23597 23159 23592 23150 23457 22998 23256 23462 23177 23160 23144 23397 23461 22981 23540 22667 23819 22758 23589 23007 23512 23140 23345 22936 23093 23351 23157 23059 23253 23216 23648 22958 23372 22595 23872 22677 23545 22900 23536 23136 23405 22808 23127 23243 23134 22924 23101 23204 23280 23054 23292 22812 23759 22743 23367 22734 23724 22856 23331 22906 23081 23289 23104 23069 23097 22864 23724 22631 23569 22687 23581 23128 23077 22896 23251 23112 23503 22807 23430 22550 23741 22693 23512 22717 23121 23232 23020 23181 23254 22775 23707 22597 23452 22859 23264 23144 23057 23033 23762 22853 23671 22576 23414 22718 23296 23159 23063 22921 23184 22551 23623 22609 23360 22748 23058 23232 23239 22908 23314 22617 23647 23132 22950 22999 23092 22762 23616 22711 23379 22882 45 16516 17629 17528 18352 17907 18624 18849 18547 18589 28960 24704 24860 23943 23791 23667 23780 23159 24070 22981 23616 23283 22983 23749 23714 22848 23694 22853 23562 23781 22714 23554 23388 22520 24242 22893 23159 23395 22808 23319 24139 22412 23582 22886 22601 23865 23309 22497 23508 22881 22432 23954 23344 22517 23511 22833 23181 23936 22598 23119 23176 22481 23552 23802 22520 23545 23272 22416 24128 22784 22384 23504 23330 22651 24116 22743 22943 23196 22948 23110 23343 23052 22872 23308 23113 23045 23394 23397 22703 23348 22912 22937 23153 23432 22674 23228 22916 22754 23240 23447 22651 23287 22859 22957 23028 23541 22656 23191 22990 23118 22651 23559 22835 22996 22963 23040 22588 23451 23148 22985 23041 23156 22551 23384 23178 23100 22857 23291 22717 23228 23248 23098 22859 23245 22483 23313 23158 22920 23001 23198 22464 23575 22926 23079 23005 23218 22375 23488 23067 22997 22857 23193 22487 23392 23106 23032 22796 23366 22545 22988 23206 23448 22573 23275 22861 23093 22672 23612 22759 23100 22880 23511 22495 23720 22828 23100 22949 23247 22464 23442 23109 23040 22942 23132 22439 23525 22959 22858 22936 23133 22513 23405 18176 19537 20024 20231 19720 20642 20291 20201 20327 40421 24179 24023 23701 23536 23040 23547 23098 23236 23376 23488 22784 23402 22848 22889 23248 23472 22698 23430 23197 23050 23336 23289 22604 23385 22787 22833 23151 23399 22663 23300 22847 23012 22986 23610 22705 23083 23000 22915 22496 23604 23056 23015 23080 23085 22362 23749 23314 22519 23216 23040 22335 23291 23905 22400 23177 23454 22864 22639 23868 23011 22599 23351 22636 22623 23864 23242 22295 23524 22806 22292 23652 23575 22194 23461 22630 22456 23740 23393 22224 23545 22150 22363 23861 23053 22264 23432 22769 22349 23182 24100 22656 22960 23136 22872 23020 23291 23010 22640 23268 22774 22770 23123 23352 22701 23243 22992 23045 22593 23466 23104 22743 22960 23011 22595 23164 23212 22968 22712 23224 22627 22987 23288 23424 22505 23244 22765 22872 22949 23499 22568 23168 22825 23120 22866 23573 22871 22952 22934 23140 22555 23354 23040 22860 22909 23137 22481 23307 23073 22960 22703 23168 22556 23239 23109 23066 22644 23372 22647 23024 23155 23186 22624 23280 22447 22949 23139 23442 22460 23247 22650 23036 22662 23557 22544 23189 22657 23224 22680 23554 22455 23051 16704 21422 20960 22104 21776 21633 21687 21914 21207 22116 24320 23387 22745 23562 23150 22982 23069 23332 22512 23422 22660 22889 23011 23495 22557 23146 22801 23033 22653 23453 22637 23207 22788 23162 22774 23484 22899 22880 22972 23073 22644 23056 23214 23008 22807 23180 22642 22968 23264 23462 22528 23201 22876 22752 22771 23956 22478 22963 22984 22865 22635 24066 22432 22797 23172 22772 22332 24033 22773 22445 23296 23352 22171 24050 23734 22203 23160 23058 22263 23049 23873 22384 22709 23255 22509 22779 23933 22754 22478 23299 22673 22276 23686 23254 22735 22983 23015 22522 23288 23095 22837 23021 23107 22750 23191 23214 22831 22730 23143 22750 22764 23161 23175 22519 23216 22752 22765 22951 23453 22490 23152 22726 22865 23061 23544 22575 23106 22759 22956 22931 23554 22449 23136 22724 22962 22853 23572 22510 23200 22662 23136 22451 23526 22663 22961 22855 23064 22489 23605 22663 23051 22697 23054 22304 23461 23056 22887 22697 23229 22760 22974 23067 23182 22628 23287 22581 22869 22916 23554 22389 23353 22720 22992 22808 23594 22556 23189 22636 23296 22629 23527 22694 23159 22757 22919 22765 23624 22735 23040 22814 23223 22444 23567 22758 22931 22929 23066 22480 23430 23027 22833 22919 23156 22776 22909 23221 23131 22585 23224 22720 22771 23015 23309 22511 23254 22824 23112 22565 23464 22747 22969 22971 22900 22300 23687 22995 22493 23061 22423 22167 23918 23136 22298 23047 22978 22341 22819 23866 22267 23055 23005 22291 23152 23673 22160 23191 22840 22198 23057 23846 22841 22446 23276 22770 22530 23910 22840 22202 23370 23112 22384 23099 23128 22751 22999 22988 22521 23363 22948 22688 22933 22991 22576 23288 23057 22832 23061 22949 22528 23243 23136 22758 22864 22989 22410 23223 23224 23002 22680 23162 22287 22793 23111 23398 22572 23027 22850 23044 22482 23429 22943 22877 22809 23035 22500 23125 23056 23157 22644 23308 22681 22989 22356 23509 22815 23012 22788 23154 22510 22951 23026 23277 22461 23190 22775 23367 22356 23408 22893 22889 22871 23204 22816 22984 23087 23217 22442 23384 22609 22920 22484 23404 23019 22836 22779 23239 22484 23009 23051 23332 22417 23303 22679 23116 22456 23488 22848 22968 22589 23265 22685 22812 22864 23492 22825 22861 22908 23055 22554 23058 23250 23170 22502 23146 22792 22588 22418 23412 23095 22762 22823 23080 22773 22540 23242 23727 22492 22714 23175 22775 22109 23130 23869 22908 22109 23296 22987 22690 22170 23606 23575 22349 22599 23259 22684 22504 23404 23959 22533 22528 57 8135 9481 12369 13245 12173 13078 13291 13617 13269 33000 27857 26088 25015 25196 24405 24266 24071 24545 24092 23832 23941 23856 23417 23823 23958 23735 9377 15057 15540 16085 16360 17171 16608 16973 17026 17141 28227 26550 25643 24980 24293 24804 23994 24248 23660 24522 24020 23848 23702 24120 23217 23686 23777 16205 17138 18305 18348 18829 18203 19095 19063 19145 38308 26951 24911 24800 24096 24961 23917 24117 23760 24259 23315 23924 23845 23992 23240 24044 23361 23518 19200 20652 19818 20823 20407 20700 20433 21432 20535 28045 24843 24448 23467 24182 23973 23770 23475 23958 23477 23415 23553 24051 23124 23623 23405 23098 16627 22008 21826 21864 21988 22242 22032 21821 22357 22653 24101 24160 23532 23044 23477 24552 22942 23316 23716 23379 22759 23720 24278 23335 22639 23844 23177 22900 23234 24415 23035 22816 23692 23272 22724 22800 24084 23769 22467 23481 23428 22983 23378 23559 23546 22919 23575 23104 23207 22937 23707 23476 23072 23292 23426 23301 22964 23280 23796 22855 23287 23243 23340 22704 23401 23506 23383 22843 23582 22929 23146 23276 23891 22867 23288 23101 23398 22930 23863 23036 23179 23080 23416 22694 23741 23269 23232 22912 23565 22887 23108 23237 23728 22885 23159 23104 23381 22512 23731 23176 23250 22802 23584 22935 23084 23145 23770 23108 23017 23136 23363 22744 23455 23261 23552 22756 23586 22823 23184 22662 23744 23161 23133 23084 23365 22895 23118 23324 23476 22731 23404 22916 23205 22881 23825 23269 23031 22943 23308 23407 22999 23218 23664 22672 23120 23337 23357 22257 23020 24054 23088 22267 23552 22953 22647 23148 24166 22638 22715 23400 23037 22327 23658 23993 23315 22224 23351 23192 22904 22457 24009 23708 22416 22903 23109 23305 22639 23417 23330 23126 22776 23327 23003 23098 22828 23374 23373 23122 22796 23296 23045 23062 22614 23424 23282 23129 22909 23254 23157 22931 23150 23672 22800 23100 23031 23271 22884 22926 23209 23639 22579 23285 22858 23112 22547 23669 23160 23127 22766 23451 22936 22995 22633 23645 23094 23027 22839 23417 22785 23017 22723 23739 22978 23084 22666 23480 22757 23114 22711 23655 23065 23024 23001 23297 22685 23005 23184 23544 22518 23441 22819 23729 22501 23582 23103 23024 22831 23416 22648 22941 23234 23506 22621 23248 23037 23276 22704 23740 23241 23061 22722 23353 22836 22997 22760 23600 22951 22784 23165 23109 22432 23051 23866 22863 22423 23431 22935 22534 23008 24131 22732 22700 23373 22897 22204 23858 23589 22553 22569 23488 22890 22265 23514 23898 22423 22808 23387 22325 22266 23310 23446 22567 23269 22902 23088 22554 23419 23232 22827 23061 23232 22823 22905 23372 23159 22602 23285 22869 23067 22856 23568 23176 22921 22972 23284 22771 22981 23180 23452 22518 23328 22885 23152 22496 23530 22952 22912 22770 23318 22788 23100 23131 23303 22521 23381 22590 22890 22862 23595 22658 23115 22869 23612 22309 23395 23053 22946 22714 23241 22599 23055 23117 23208 22518 23406 22661 22802 22888 23532 22618 23109 22843 23233 22420 23536 22840 22969 22872 23248 22545 23149 23264 23082 22756 23247 22786 23047 23228 23047 4250 9555 10872 12587 12935 13067 12872 13892 13659 43623 30040 27284 25335 25472 24702 10264 15058 16932 15892 16474 17064 16907 16405 18295 17013 28964 27028 25684 24503 25045 11234 17208 18720 18967 18577 18977 20218 19257 19019 19827 28108 25555 26008 24800 23913 24700 19642 20323 21267 20931 20856 21024 21094 20503 21488 28103 24852 24483 24280 23639 24417 21511 21961 22224 22327 21739 22692 22234 22072 22219 22261 23657 24334 23808 23579 23534 23739 23047 23866 23593 23472 23394 23705 23130 23716 23605 23568 23240 23698 23087 23498 23577 23520 23078 23664 23202 23479 23517 23335 23264 23485 22766 23772 23366 23328 23241 23528 22670 23913 23047 23180 23157 23412 22730 23699 23396 23343 23216 23394 22656 23884 22946 23353 23228 23424 22703 23824 23188 23175 23239 23537 22837 23816 22797 23483 23086 23442 22840 23835 22862 23340 23010 23040 23259 23611 22743 23482 22988 22916 23233 23944 22456 23584 22898 22745 24079 22746 23102 23268 22487 23196 24020 22560 23243 23086 22393 23887 23342 22483 23459 22885 22519 24114 23456 22704 23278 22855 23079 24055 22808 23183 23129 22601 23646 22805 
23154 22427 22500 22240 23207 21976 22723 22065 22515 21848 22347 21607 22621 22075 23007 22692 23256 22610 23028 22127 22645 22036 22440 21878 22888 22319 23093 22177 22625 22153 22625 21633 21788 21267 22491 22766 23913 23552 23632 22570 22380 21517 21504 21429 22529 22701 22893 22443 22346 21559 21764 21288 22119 22605 23429 23424 23516 22748 22345 21657 21431 22141 22329 22856 22416 22671 22299 22947 22181 22180 21957 22234 22409 22821 22817 22956 22387 22275 21958 22228 22080 22776 22245 22503 22345 22415 21762 22546 22581 23296 22503 22617 21725 22242 22023 22745 22168 22656 21999 21809 21933 22252 21949 22913 22613 23111 22072 22697 21765 22601 22218 22996 22148 22638 22200 22605 21720 22333 21717 22829 22453 23175 22157 22690 21646 22461 22241 22896 22182 22809 22248 22708 21596 22545 22061 23053 22403 23253 22092 22705 21694 22520 22050 22792 22159 22685 21963 22464 21701 22360 22242 23128 22541 23081 22048 22321 21827 22528 22231 22828 21988 22416 21924 21824 21719 23060 23470 23145 21844 21607 21275 22636 22592 23032 21919 22353 21101 21822 22519 23524 23284 22949 21776 21529 21318 22634 94 1074 3027 4874 6699 8461 8708 43623 43683 39699 34536 31712 29879 28196 27364 26038 26705 24951 25108 24220 25536 24112 23948 24122 24013 24357 23483 24701 22554 24288 22243 24612 22832 23393 22417 24119 22909 23509 23255 23143 23365 22432 23958 22213 22881 22426 23952 22193 22758 22400 23537 22726 22377 22761 22962 23031 22810 23528 22239 23238 22538 23425 22229 23264 22261 23580 22022 23290 21879 23978 21724 23338 22131 23229 22545 22804 22481 22979 22439 22661 22581 22946 22509 22660 22403 22824 22415 22541 22305 22845 22487 22424 22384 22921 22608 22412 22433 22753 22518 22385 22546 22765 22496 22307 22651 22638 22700 22425 22793 22424 22841 22297 22880 22467 22667 22166 22595 22657 22680 22261 22508 22371 22735 22161 22764 22469 22652 22035 22629 22615 22521 22248 22353 22659 22407 22238 22259 22981 22696 22593 22621 22912 22701 22487 22625 22759 22844 22414 22820 22336 23388 22067 22989 21906 23419 21922 22977 21794 23428 21821 23079 21801 23488 21926 23137 21850 23352 22117 23104 22287 23015 22280 22901 22401 22943 22275 23022 22156 22947 22539 22738 22266 22599 22711 22663 22294 22679 22658 22879 110 0 2345 6705 8294 10068 11193 12946 12817 43603 43693 40071 33171 31083 27905 28029 26097 26248 24908 25287 24554 24406 23770 24259 23920 24195 23437 23902 22872 24133 22649 23800 22530 24156 22566 23826 22600 23328 23149 23243 22786 23390 22823 23296 22613 23186 22299 23649 22354 23397 22427 23202 22816 23077 22469 22752 22952 22940 22650 23330 22480 23644 22104 23253 22277 23367 22508 23042 22308 22760 22862 22707 22543 22647 22455 23206 22343 22997 21886 23464 22075 23205 22087 23158 22486 22949 22272 22417 23169 22323 22697 22496 22441 23296 22036 22699 21701 23955 21341 23389 22005 23298 22401 22674 22125 22322 23376 21912 22560 21928 23511 22349 22553 22624 22022 23690 21410 23083 21454 23266 22934 22144 22482 21701 23328 22126 22579 21659 21799 23908 21247 23137 22088 22116 23625 21641 22742 22276 22534 23344 21780 22728 21510 23608 22071 22485 22448 22136 23076 22337 22632 22248 22281 22881 22503 22401 22596 21961 22997 22190 22728 22404 22292 22916 22180 22544 22457 22003 22935 22350 22547 22309 22196 22745 22797 22235 22743 22076 22891 22577 22595 22586 22292 22244 23129 22006 22890 22101 22352 22646 22661 130 1074 7087 10641 12687 13560 14608 15367 15141 16996 43673 35894 30797 28589 26540 26616 24717 25056 24038 23854 23957 24125 23150 23891 22884 23669 23304 23179 22981 23269 22560 23910 22551 23264 22558 23040 22768 23639 22042 23480 22313 22792 22793 23110 22464 23200 22177 23082 22775 22965 22402 23051 22151 22932 22769 22666 22419 22973 21813 23468 22424 22693 22329 22314 21952 23512 21964 23055 22284 22573 22085 23475 21847 23065 22167 22528 22386 23302 21929 22990 22281 22664 22296 23443 21859 23021 22034 23240 21731 23404 22080 22669 22192 22361 21800 23401 22144 22833 22259 23260 21951 23379 22071 22518 22311 22778 21778 23013 22488 22437 22272 22877 21937 22835 22710 22529 21820 22829 21962 22524 22667 22967 21850 22981 21959 22382 22377 23181 21816 22905 22022 22528 22287 23018 21878 22912 22007 22047 23136 22681 21744 23112 21821 22255 23591 22737 21470 23068 21800 21789 23187 23160 21284 23124 22109 21721 22651 23838 21545 22330 22595 22263 21228 22993 23350 21789 22297 22615 21760 22386 23534 22030 21961 22912 21969 22118 23448 22297 21376 23086 22017 21792 23362 22851 21479 22916 22245 21753 23078 22370 22262 22384 6644 11925 15627 16372 16921 17875 18229 18022 19215 41947 32283 28443 26279 24816 24662 24423 23588 23560 23561 23222 23031 23392 23182 22700 23168 22482 22886 23127 22845 22565 22865 22356 22567 23059 22805 22407 23064 22514 22589 22859 23011 22135 23044 22231 22529 22479 23268 22049 22823 22377 22689 22093 23251 22161 22681 22341 22672 21923 23303 22192 22630 22387 22811 21794 23204 22440 22536 22109 22919 21967 23032 22528 22534 22288 22762 21962 22785 22561 22858 21928 22873 22007 22473 22603 22741 22023 22944 21761 22757 22509 22561 21984 22896 21804 22792 22628 22661 22001 22993 21935 22396 22432 23184 21819 22833 21969 22544 22035 23273 21803 22630 22065 22420 21600 23292 22418 22659 21971 23033 22126 22554 22562 22969 21707 22901 22053 22451 22264 23134 21829 22765 22043 22491 21764 23196 22159 22443 22215 22631 21689 22962 22376 22423 22315 22740 21920 22400 22649 22858 21816 22934 22055 22067 22747 23189 21458 23001 22088 21785 22754 23232 21232 22886 22091 21664 22272 23731 21352 22503 22298 22031 21972 23820 21677 22281 22528 22341 21276 23296 22899 21633 22537 22460 21429 22884 23382 21696 22407 22407 21300 22391 12756 16423 17758 19720 20285 19722 20899 20579 20394 20800 28822 25382 24425 24185 23303 23008 23232 22842 22775 23252 22784 22407 22903 23122 22336 22677 23051 22137 22903 22387 22424 22469 23136 21943 22844 22317 22520 21902 23105 22352 22466 22400 22820 21885 22951 22644 22514 22157 22851 22115 22263 22503 23060 21888 22932 21998 22387 22349 23104 21755 22976 21993 22490 22278 23227 21632 22805 21952 22492 22083 23284 21800 22811 22135 22656 21725 23144 22060 22476 22213 22774 21640 23264 22387 22369 22105 22785 21768 22968 22577 22560 21820 22811 22016 22517 22624 22897 21799 22942 21869 22312 22295 23058 21527 22982 21813 22460 21853 23391 21824 22855 22085 22809 21825 23253 22044 22439 22185 22552 21655 23174 22406 22420 22258 22584 21579 23012 22426 22344 22165 22528 21698 22999 22350 22335 22221 22690 21447 22993 22583 22150 22032 22857 21590 22342 23304 22090 21959 22717 21623 22448 23220 21959 21443 23047 21938 21531 22677 23592 21544 22528 22311 22164 21993 23709 22045 21751 22759 22309 21171 23416 22677 21604 22602 22352 21372 23062 23212 21640 22418 22231 22219 22397 22853 21913 22708 22211 22197 22327 22923 22089 22355 22432 22229 22031 22861 22278 22199 22336 22653 21909 23088 22488 22321 22137 22594 22102 22356 22696 22400 22174 22655 21814 22179 22561 23120 21760 22640 22073 22542 22161 23086 21783 22631 22213 22605 21934 23152 21815 22552 22089 22612 21632 23132 22176 22429 22160 22614 21527 23041 22235 22435 22161 22577 21720 23195 22017 22384 22107 22764 21648 22843 22342 22435 22077 22759 21659 22752 22455 22601 22035 22885 22093 22337 22513 22682 21874 23029 21697 22446 22383 22903 21868 22989 21827 22493 22320 22706 21815 22911 21894 22247 22376 22925 21706 22819 22023 22309 22173 23108 21894 22592 22134 22638 21648 22856 22545 22412 21959 22739 21617 22236 22490 22953 21626 22864 22089 22242 21818 23667 22683 21656 21902 22930 21844 21751 23114 23157 21256 22518 22279 22059 21449 22858 23371 22074 21603 22953 21955 21693 22912 23574 21364 22400 22551 22147 21389 23507 22695 21614 22167 22354 22816 21877 22744 22596 22247 22304 22489 22226 22100 22716 22711 21885 22501 22364 22248 21821 22477 22740 22537 21928 22626 22024 22465 22007 23025 22359 22176 22272 22521 22187 22285 22398 23067 21959 22497 22212 22616 21590 23027 22507 22472 21954 22837 22028 22293 22137 23091 22070 22425 22167 22696 21682 22484 22349 23209 21772 22592 22151 22667 21609 22912 22380 22460 22005 22981 21790 22604 21965 120 87 87 80 3432 4757 7593 8521 9271 9821 43651 44160 37632 32676 31502 28569 27648 26439 26504 25032 25307 24885 25067 23723 24756 23669 24029 117 100 5629 9260 11204 13046 13205 14953 15353 43603 43658 38532 32768 30213 28082 28005 26587 25721 25166 25496 24636 24048 24604 25648 23465 23808 24200 505 6747 11704 14892 15374 15074 17447 17126 17159 43642 40467 33133 28837 27711 26965 25207 24709 25325 25813 23471 24327 24112 23609 23364 24838 23751 394 10143 14223 16114 17899 18871 18601 19436 19564 19812 38792 31974 28201 26311 25549 24973 24172 24595 24320 23977 23323 23950 23412 23339 23449 24083 22912 12590 16833 19171 19415 21146 20826 20951 20828 21652 21014 29382 26513 25485 23716 24617 23360 23616 23210 24281 22861 23324 23003 23447 22636 23348 23189 23494 22400 23518 22487 23080 22442 23815 22658 22987 22505 23275 22312 22903 22859 23453 22223 23300 22328 23125 22229 23712 22554 22913 22264 23260 22213 22870 22641 23427 22149 22906 22579 22993 21956 23095 22859 22995 22101 23172 22247 22823 22198 23533 22379 22705 22512 22857 21972 22930 22888 22402 22348 23183 21932 22168 23389 23000 21541 23303 22144 21841 22362 24005 22017 22100 22914 22525 21782 22220 23557 22487 21672 23145 22130 21853 22272 23826 22535 21835 22731 22917 22323 22033 23095 22648 22400 22640 22644 22376 22343 22887 22768 22164 22664 22537 22786 22040 22989 22637 22311 22312 22898 22166 22295 22779 22977 21825 22889 22233 22651 21831 23032 22644 22576 22144 22883 22073 22424 22359 23317 21930 22432 22265 22822 21995 22660 22473 22981 21806 23018 22000 22387 22188 23227 22065 22572 22249 22906 21878 22608 22377 23288 21681 22963 22180 22087 21612 23139 22543 22500 21953 22896 21946 22632 21811 23291 22331 22592 21970 22989 21936 22683 22109 22998 22469 22519 21938 22901 21973 22333 22208 23187 21985 22619 22301 22749 21803 22733 22647 23127 21932 22595 22346 22620 21396 23078 23235 22071 21879 23042 21888 21666 22456 23833 21725 21888 22022 22983 21283 21600 22543 23872 22321 21658 22380 22791 22039 21579 22325 23724 22696 21602 22302 22847 21942 22041 22761 22641 22215 22232 22721 22589 22100 22616 22661 22210 22309 22446 22347 22037 22804 22743 22311 22209 22663 22105 22155 22340 22899 21885 22663 22417 22592 21848 22645 22720 22724 21799 22862 22057 22478 21916 23128 22193 22365 22191 22640 21816 22682 22487 22912 21610 22903 21985 22454 22109 23095 21883 22629 22141 22657 21622 22971 22496 22704 21847 23065 21866 22310 22137 23109 21760 22576 22121 22657 21593 23081 22402 22720 21815 23054 21849 22401 22262 23095 21680 22896 21963 22599 22016 23120 22192 22432 22124 22871 21523 22254 22549 23096 21783 22559 22173 22260 21673 22946 22672 22468 21997 22835 22051 21896 22409 23552 21361 22595 22397 22231 21768 23740 22238 21795 22649 22434 21421 22549 23299 22104 21332 22993 21964 21472 22653 23368 21324 22583 22278 22067 21847 23816 22004 21748 22583 22282 22141 22416 22956 22115 22365 22461 22299 21851 22880 22551 21959 22390 22458 21948 22632 22658 22377 22236 22546 21931 100 85 78 2231 5273 6451 8675 9731 10521 43625 43661 40348 35072 31949 29940 129 4540 8879 12157 13466 15559 14887 16584 16177 43657 43685 40233 33628 30951 28852 138 8442 14299 15687 17239 17618 18867 18113 19680 19312 43682 34816 31501 28244 27884 6263 13137 16514 19045 19076 20099 20375 20998 20199 21275 37584 31651 28569 27182 25766 25890 17242 20192 21088 21648 21151 22126 21628 21939 22189 32439 27347 26376 25184 24613 24568 24509 23313 24350 22846 23583 23472 24451 22704 23821 23132 22548 23420 24369 22083 23361 22965 22656 22920 24295 21959 23253 22698 22281 23339 23779 21826 23536 22461 22113 23779 23092 21943 23220 22333 21981 23639 22844 22601 22765 22504 22272 23389 22309 22811 22569 22519 22387 23271 22536 22650 22664 22484 22449 23255 22213 22839 22359 22553 22757 23168 22148 22901 22347 22646 22652 23298 21920 22918 21696 22470 22818 22983 22057 23093 22388 22456 22609 22699 22295 22864 21761 23213 22323 22710 22338 22710 21639 23264 22281 22669 22279 22854 22008 23355 21882 22976 22187 22753 22053 23205 21669 23050 22066 22460 22652 22733 22141 22930 21869 
