# Supplementary material for: An Active Feature Selection Strategy for DWT in Artificial Taste
Source: Hindawi journal article supplement (doi:10.1155/2018/9709505), 2018-01-01
Supplement: f1 [file 9709505.f1.zip › oolongTea-hi-3.txt]

43482 43476 43393 43473 51 8201 18305 21805 21463 22992 22184 23360 22497 23537 22688 23194 22863 22848 23053 22439 23041 22451 22866 22401 22829 22341 22553 22315 22598 22324 22680 22579 22961 22445 23206 22416 23438 22477 23501 22664 23456 22745 23221 22394 22756 22130 22854 22240 23146 22499 22983 22824 23224 22839 23264 22295 22935 22116 22951 22446 23598 22414 23705 22566 23437 22407 22808 22129 22929 22320 23065 22704 23222 22793 23376 22438 22923 22118 23234 22364 23778 22568 23453 22428 22822 22115 23100 22465 22986 22828 23296 22343 23116 22080 23172 22324 23558 22451 23648 22580 23189 22188 23070 22630 23095 22958 23204 22652 23072 22200 22757 22448 23203 22489 23376 22659 23124 22216 23015 22675 23040 23012 23184 22594 22902 21956 22464 22049 22944 22509 23960 22959 23472 22668 22390 21841 22208 22179 22702 23296 22877 23687 23316 22690 22389 21883 22212 22440 23784 23005 23831 22839 22690 22132 22074 21864 22501 22769 22424 23383 22679 23434 22831 22921 22314 22704 22512 22987 23026 23068 23043 23060 22593 22787 22263 22844 22554 23456 22721 23413 22346 22725 22188 22961 51 16233 18432 19635 19632 20241 19563 20213 19574 20576 30208 26487 23880 23893 22853 23413 22873 23580 23178 23584 23036 23312 22204 23367 22684 23747 22631 23796 22708 23232 22426 22957 22368 23132 22965 23494 22820 23229 22088 23100 22870 23544 22526 23657 22629 23078 22155 23055 22496 23160 22914 23363 22716 23446 22053 22925 22414 23363 22391 23726 22638 23225 22222 23054 22592 23143 22827 23152 22161 22983 22503 23607 22759 23176 22460 22834 22619 22964 23030 23123 22335 22812 22504 23379 22711 23509 22712 22408 21997 22720 23105 23148 23345 22869 22008 22082 22427 23952 23075 22852 21733 22519 23191 22928 23514 23040 21933 22161 22601 23965 23058 22558 21851 22413 23155 22979 23531 22855 21881 22007 23090 23061 23124 22797 22972 22247 22743 22594 23383 22857 22774 22392 22717 23027 23140 22790 22880 22307 23004 22514 23470 22560 22799 22203 23061 23146 23201 22320 22836 22506 23511 22493 23304 22254 22948 22678 23208 22814 23268 22249 22854 22056 23528 22577 23100 22099 23206 22581 23260 22745 23314 21990 22956 22348 23586 22574 22983 22092 23244 22836 23392 22509 22953 22053 23380 22372 23677 22566 22912 22112 23072 22772 16913 19328 20807 20653 21761 20837 21760 20628 21640 39124 25271 23549 23573 22681 23742 22715 23664 22682 22952 22704 23302 22765 23024 22496 23445 22830 23129 22358 22684 23032 23205 22533 22705 22784 23648 22592 22866 22848 23152 22692 22862 22379 23422 22820 22958 22016 22856 23582 23344 21905 22500 22492 24050 22615 21980 22617 22752 23443 22486 22120 23510 22871 23127 21873 22556 23593 23235 22621 22024 22544 23968 23153 22713 21827 22123 23818 23121 22112 21898 22968 23143 23153 22216 22994 22553 23348 22587 22681 22874 23048 22735 22693 22545 23497 22717 22730 22838 23213 22360 22982 22560 23222 22231 22997 22980 22990 22430 23456 22697 22769 22326 23113 22133 22944 22497 23336 22184 23079 22871 23245 22099 23394 22627 23121 22133 23145 22688 23079 22707 23712 22382 23021 22426 23158 22672 23040 22182 23592 22579 22732 22558 23328 22194 22920 22330 23440 22167 23160 22815 23415 22008 23127 22311 22990 22240 23140 22798 22968 22700 23504 22454 22839 22708 23427 22068 22957 22327 23460 22088 23045 22751 22877 22442 23584 22458 22791 22759 23241 22194 23017 22601 23072 22327 23024 22775 22760 22498 23394 22521 22934 22951 15421 20166 21712 21490 21572 21351 21979 22061 21500 21319 25712 23025 22885 23911 23145 22173 24048 22964 22346 23545 23360 21918 23100 23072 22460 22400 23107 22672 22187 23009 22505 22213 23057 22988 21961 22441 23760 21935 22920 23829 22438 22746 23139 23105 22360 23465 22601 22876 23055 23058 22484 23277 22895 22673 23051 23190 22233 23372 22781 22695 22912 23319 22369 23522 22437 23144 22925 22802 22429 23324 22237 23025 22833 22808 22352 23352 22178 23107 22931 22844 22354 23416 22173 23063 22770 22942 22325 23481 22076 23144 22740 22976 22197 23379 21937 23120 22686 22814 22305 23482 22136 23007 22768 22811 22459 23165 22072 23286 22188 23141 22368 23056 22400 23302 22272 23046 22561 22752 22560 23272 22123 23114 22407 22968 22441 23328 22124 23282 22469 22886 22574 23441 22005 23473 22632 22858 22844 23297 22232 23520 22560 22769 23013 22852 22936 23235 22261 22986 22667 22774 22432 22940 22401 23083 22119 23057 22661 22391 22876 23175 21845 23772 22445 22554 23639 22467 22458 23853 21804 22592 23312 22011 22571 22881 21993 22940 22137 22898 22992 22029 23080 23202 21783 23595 22957 22017 23670 22560 22274 23860 22268 22129 22151 21423 22011 21920 22328 22003 22203 22187 22644 26385 23879 22937 23035 23075 22816 22636 22822 22753 23189 22384 23464 22640 22983 23034 22884 22359 23117 22512 23206 22234 23580 22327 22996 22585 22918 22540 22949 22446 23318 22123 23580 22412 22812 22846 22881 22629 22788 22786 23211 22354 23562 22010 23287 22080 23382 22485 23032 22732 22869 22408 23000 22647 23240 22152 23648 22104 23012 22635 23018 22374 22988 22584 23319 22044 23509 22059 23126 22601 23094 22626 22764 22787 23111 21600 23437 21969 23303 22120 23483 22426 23018 22804 22944 22253 23136 22457 23235 22242 23497 22224 22968 22594 22980 22548 22832 22808 22770 22440 22996 22484 23303 22402 23488 22261 22966 22537 22985 22669 22614 22995 22513 22598 22534 22881 23010 22168 23790 21805 22817 22032 23149 22838 22360 23641 22100 22532 22155 23335 22665 22620 23238 22324 23309 21889 23969 21900 22720 22249 23091 22567 22823 23090 22190 22992 21973 23890 22385 22807 22716 22988 22784 22858 22988 22630 22638 22605 23047 22857 22818 23112 22566 23171 22352 23354 22280 23040 22345 23302 22391 22983 22610 23156 22657 22838 22976 22789 22544 22746 22727 23056 22320 21616 21870 22834 21957 23168 21838 22842 21791 23236 22154 23451 22595 23233 22593 23114 22784 23132 22460 23026 22828 22921 22396 22789 22705 23047 22428 23216 22378 23216 22408 23530 22206 23348 22114 23632 22057 23192 22022 23649 22389 23094 22030 23445 22304 23205 22191 23348 22362 23040 22678 23022 22475 22930 22648 23045 22621 22854 22790 22787 22512 22691 22866 22849 22356 22894 22777 22871 22466 22828 22946 22903 22535 22881 22791 23012 22391 23075 22769 22933 22479 22598 23021 22794 22471 22625 23016 22881 22368 23073 22518 23148 22415 23648 21852 23151 21841 23931 21668 22807 21955 23749 22113 22611 22005 23744 22216 22628 22648 23079 22896 22609 23178 22496 23000 22309 23261 22585 23153 22459 23147 22528 23109 22231 23079 22652 22989 21853 22864 22966 22844 22552 22670 22953 22741 22439 22800 22871 22944 22401 22853 22869 22672 22530 22726 22819 22803 22470 22780 22984 22813 22500 22735 22810 22972 22631 23079 22739 23010 22540 23068 22567 23048 22496 22976 22618 23097 22466 23022 22669 23193 22407 23061 22445 23172 22488 22712 22560 23264 22349 23426 22377 23225 22368 23233 22406 23223 22349 23136 22528 23137 22489 23042 22464 23255 22382 23131 22455 23260 22372 23552 22519 23128 22528 23180 22373 23191 22553 22937 22406 23100 22604 22931 22656 23056 22604 22965 22208 23329 22319 22912 22085 23460 22180 23188 22236 23363 22245 23255 22214 23586 22167 23217 22480 22600 23097 22515 22545 22135 23580 22009 22773 21976 23640 22073 22871 22676 22132 23700 21923 23185 22044 23415 22308 23125 22277 23280 22667 22834 22410 22556 23335 21925 23125 22144 23500 22321 23105 22375 23121 22694 22865 22501 22807 23061 22663 22729 22546 23053 22775 22680 22349 22764 23221 22464 22870 22182 23536 22267 23156 22198 23468 22285 23099 22570 23115 22713 22999 22426 22720 22865 22865 22592 22893 22567 23271 22362 23015 22067 23525 22115 23174 21976 23622 22123 23344 22264 23156 22593 23143 22307 22849 22777 22905 22496 22979 22636 23017 22437 23080 22298 23417 22339 23210 21930 23543 22082 23264 22240 23407 22213 23205 22248 23111 22547 22961 22403 22666 22873 22816 22610 23168 22656 23264 22377 23079 22123 23644 22087 23173 21961 23515 22433 23074 22378 22876 22786 22844 22470 22628 22779 22869 22682 23056 22420 23304 22316 23033 22168 23163 22693 22964 22318 22569 22915 22862 22549 22952 22031 23500 22077 23113 21904 23531 22592 22828 22412 22225 23625 21947 23000 22346 23195 22666 22755 22573 22336 23622 21890 23060 21699 12745 17522 19366 19457 19936 20684 20137 20106 19908 43464 26442 24532 23144 23547 23635 22824 22957 22218 23380 22926 22935 23057 22946 23308 22617 23112 22473 18616 20399 21472 21104 21654 21563 21647 21377 21404 38656 24698 23552 23673 22930 23848 22580 23552 22773 23415 22923 23096 22751 23062 22990 23264 22688 47 20176 22350 21173 22193 21169 22741 21505 22615 22037 28724 23790 23528 22888 23191 23109 23270 22808 23328 22538 23737 22268 23501 22329 23501 22576 23413 15549 21754 22064 22280 21945 22576 22186 22792 21913 22658 23956 24192 22338 23703 22473 23641 22564 23280 22422 22960 23050 23264 22588 23118 22253 23705 22252 21736 21721 23254 22132 22998 22075 22568 22486 22778 22240 23597 22416 23726 22285 23377 22224 23107 22959 22815 22725 22861 22388 23586 22280 23219 22459 23329 22787 22944 22623 22779 22800 23132 22524 22903 22002 23501 22286 23175 22528 22474 23488 22254 22915 22725 22099 23761 21732 23311 22148 23564 22597 22800 22437 22053 23768 22114 23153 22562 22451 23863 21795 23238 22052 23211 22908 22644 22544 22088 23840 22104 23083 22517 22637 23544 22073 22961 22220 23008 22808 22759 22830 22441 23380 22426 23088 22283 23191 22724 22884 22574 22578 23044 23046 22486 22880 22249 23488 22464 23114 22374 22976 22833 22873 22638 22708 22939 23067 22748 22948 22073 23524 22213 23277 22316 22948 22769 22838 22489 22802 22685 23094 22413 23137 22068 23537 22285 23351 21904 23118 22608 23002 22291 22826 22694 23296 22304 23092 22103 23652 22124 23299 22240 23168 22720 22978 22333 22859 22752 23025 22538 23250 22115 23587 22118 23336 22188 23235 22508 22923 22311 22803 22794 22960 22531 23254 22568 23452 22051 23230 22123 23418 22521 22979 22328 22812 22856 22819 22637 22954 22828 23129 22441 22921 22120 23485 22169 23189 22511 23072 22712 22939 22451 22826 22746 23076 22483 22918 21880 23520 22279 23012 22493 22313 23524 22147 22976 22361 23031 22916 21806 23149 21936 23709 22222 22942 22484 22410 23656 22001 22919 22272 22536 23815 22007 23040 21982 23490 22636 22867 22407 22167 23757 21979 23168 22596 22337 22828 22791 22538 22759 22872 22838 22720 22641 22513 23264 22438 22928 22294 23296 22560 22797 22542 22528 22998 22869 22668 22896 22240 23448 22214 23224 22452 23112 22703 22924 22393 22688 22743 22951 22531 23005 22282 23585 22158 23303 22368 23281 22508 23011 22346 22702 22703 23143 22452 23127 22204 23622 22064 23222 22027 23544 22165 23264 22281 22883 22732 22860 22471 22826 22616 23339 22226 23184 21916 23499 22152 23256 22170 22926 22816 22809 22561 22813 22425 23425 22272 23372 22348 23433 22374 22956 22288 22844 22729 22969 22442 23052 22036 23415 22229 23056 22516 23169 22837 22806 22508 22904 22638 23168 22268 23011 22161 23419 22394 23136 22400 22676 22946 22613 22720 23382 22156 23456 22221 22987 21739 23848 21827 23246 22410 22893 22921 22468 22449 22111 23694 22449 22811 22597 22113 23764 21916 22977 21767 23808 22187 23125 22056 22634 23376 22219 22699 21965 23156 22679 22896 22474 22709 22991 22704 22748 22755 22767 23076 22538 22835 14 16733 18688 20237 19888 20652 20410 20633 20327 20626 34337 25568 23500 23571 23245 23596 17564 21128 20623 22236 21101 22163 21198 21996 21468 39044 24340 23591 23415 23557 22845 18631 20328 22545 21196 22615 21339 22488 21853 22356 21808 24433 23619 23413 22924 23237 15416 22509 21632 22866 21685 23164 21643 22971 22078 22633 24580 23438 22876 23123 23053 23553 21741 22985 21748 23390 21985 23164 22089 22787 22579 24980 22800 23083 22894 23330 22656 23106 22374 23523 22529 23189 22570 22766 23053 22768 22736 22876 22769 23240 22423 23188 22256 23255 22561 22921 22528 22288 23634 22196 23104 22696 22676 23534 22061 22880 21780 23850 22194 23115 22113 22455 23589 22072 23000 22362 23034 23040 22512 22705 21975 23882 21828 23256 22701 22836 23020 22580 23044 22157 23404 22359 23100 22556 22887 23040 22738 22697 22547 23041 22899 22517 22923 22281 23555 22216 23076 22415 23324 22723 23122 22361 22832 22856 22999 22542 23072 22230 23532 22058 23248 22320 23342 22475 23056 22286 22913 22764 22855 22443 22833 22424 23388 22232 23207 21900 23620 22204 23431 21975 23241 22611 22790 22600 22807 
22029 21495 21703 21197 21645 21554 22217 22099 22176 21581 21504 21215 21761 21767 22007 21551 21328 21249 21601 21519 22218 22070 22214 21356 21560 21415 22110 21612 21803 21505 21579 21252 22137 21922 22337 21444 21650 21676 22049 21986 21949 22193 22224 21852 22151 21479 21894 21223 21817 21239 21965 21558 22394 21797 22785 21895 21997 21528 21072 20992 20923 21806 21269 22359 21783 21845 21165 20757 20695 20378 20966 20898 22192 21351 22437 21747 21036 20567 20677 21331 21220 22450 21794 22057 21313 20775 20706 21254 21416 21505 21653 21767 21427 21376 20853 21228 20541 21845 21376 21957 21440 21409 21047 21233 21324 21545 21632 21769 21497 21670 20976 21270 21042 21881 21277 22066 21353 21578 20839 21356 21345 21671 21697 21678 21504 21578 20925 21387 20871 21568 21045 22048 21232 22048 21305 21744 20999 21265 20997 21556 21319 21576 21682 21789 21408 21686 20878 21504 21078 21991 21038 22104 21360 21840 21200 21392 20853 21316 21216 21698 21350 21562 21664 21834 21139 21517 20791 21500 21383 21928 21120 22092 21431 21673 21141 21281 21228 21553 21632 21751 21361 21628 20962 21345 143 169 6075 10108 10667 12202 12149 13041 12626 13347 25870 23399 22920 22430 21837 21461 21158 21888 21554 22754 21920 21704 20933 20786 21089 21504 22192 21571 22592 21874 21239 20920 20653 21252 21196 22555 21713 21767 20913 20579 20939 21249 22368 21652 22401 21683 20896 21027 21289 21176 21524 21742 21735 21573 21719 21152 21210 21235 21600 21258 22047 21445 21528 21082 21464 21367 21586 21443 21660 20838 21478 21186 22116 21402 21674 21095 21297 21294 21677 21565 21786 21036 21385 21051 21893 21280 22112 21271 21460 20960 21406 21376 21808 21477 21831 20717 21529 21108 22099 21399 21475 20899 21654 21368 21648 21624 21821 20842 21678 21020 22103 21388 21626 20951 21572 21370 21650 21574 21639 21060 21434 21193 22112 21331 21784 20976 21276 21054 21658 21639 21735 21067 21455 21143 22072 21414 21735 21056 21287 21420 21600 21671 21677 20882 21440 21176 22041 21346 21322 21087 21464 21715 21741 21312 21239 21004 21708 21287 22066 21424 20855 21074 21437 22315 21757 20843 20786 20955 22221 21607 22238 21126 20453 20975 21239 22396 21767 20696 20768 21234 22695 21828 21378 20535 21154 22002 21451 22232 21307 20545 21053 58 16431 17861 18296 18765 18838 19767 19265 19579 18980 35776 28273 25237 23469 22704 22438 22709 22308 22546 21869 22183 22299 22485 22079 21969 21862 22739 21980 22058 21706 22171 22261 22365 21512 22048 21778 22385 21513 22224 22191 22272 21680 21953 21687 22653 21811 22075 21459 22182 22169 22312 21272 22215 21583 22644 21522 21864 21673 22284 21250 21296 21106 21960 21369 21568 21033 21869 21708 21989 21092 21534 21184 22160 21399 21465 21003 21715 21737 21935 21003 21603 21350 22101 21288 21377 21383 21847 21469 21693 21351 22082 21441 21515 21304 21664 21699 21545 21188 22121 21442 21532 21709 21785 21130 21553 21477 22003 21128 21416 21832 21722 21057 22058 21462 21281 21573 21788 21114 21565 21391 22023 21127 21579 22280 21850 20691 21805 21656 21728 20804 21556 22272 21058 21007 22436 21821 21291 20742 21423 22457 21344 21195 22743 21417 20792 22040 21930 21231 20747 21287 22562 21248 20967 22352 21744 20673 21867 21870 21383 21514 21241 22050 21045 21918 21800 21738 21164 21945 21568 21483 21393 21758 21393 21445 21431 21908 21148 21783 21720 21792 21042 22042 21479 21241 21676 21891 21082 21689 21335 21896 21047 21719 16939 19069 19207 20414 19943 19975 19988 20552 19910 20247 28912 25239 22538 22884 22416 22378 21749 22806 21611 22325 22232 22295 21656 22707 21968 22004 22075 22426 21238 22781 21821 22039 21729 22549 21423 22053 21812 22231 21527 22309 21942 21948 21640 22656 21515 22317 21891 22061 21575 22657 21323 22311 22115 22094 21504 22576 20919 21530 21625 21469 21403 22100 21032 21533 21521 21323 21385 21563 21294 21729 21255 21597 21548 21612 21347 21868 21218 21592 21557 21588 21368 21803 21101 21737 21719 21176 21412 22057 21197 21425 21670 21033 21996 22016 20697 21960 21838 21032 21397 21860 21028 21450 21761 20771 22382 21818 20657 22636 21689 20835 22618 21728 20919 22737 21755 20777 22754 21479 21766 21788 21833 21239 22183 21541 21666 21815 21771 21355 22153 21461 21709 21931 21489 20759 22093 21220 21648 21782 21441 21305 22201 21101 21812 21693 21606 21415 21328 21641 22058 21034 22140 21504 21602 21851 21841 21337 22232 21346 21820 21792 21659 20568 22206 21077 21792 21522 21676 21302 21845 21216 21960 21102 21991 21506 21408 21750 21894 21120 22297 21470 21747 21783 21691 20968 22388 21117 21783 21511 21629 21329 21990 16857 20021 19859 20495 20356 20461 20796 20948 20419 21394 22906 22569 21863 21856 21518 21689 21751 21860 21338 22267 21152 21699 21721 21465 21479 21519 21575 21820 21181 21997 21149 21533 21457 21596 21474 21248 21752 21731 21248 22097 21092 21527 21479 21491 21560 20913 22378 21144 21390 21969 20883 21820 20588 22232 21284 21250 22313 20848 21763 20821 22257 21559 21194 22450 20777 21512 21287 21560 21840 20726 22415 21306 21406 22594 20689 21751 20766 21973 21917 20859 22130 21106 21680 21542 21547 21472 21219 21719 21561 21276 21958 21088 21655 21158 21809 21543 21421 21782 21475 21289 21520 21365 21848 20907 22128 21141 21688 21204 21830 21435 21574 21851 21424 21235 21477 21433 21885 21014 22189 21062 21812 20916 22003 21367 21557 21607 21603 21214 21560 21495 21864 21141 22245 20918 21715 21004 21928 21258 21047 21600 21597 21453 21390 21703 21529 21184 21496 21413 21895 21128 22062 21040 21873 20879 22066 21093 21655 21394 21636 21520 21601 21778 21511 21227 21415 21706 21748 21200 21892 21021 21856 21062 22136 21130 21832 21179 21991 21553 21744 21463 21696 21551 21392 21861 21301 21447 21440 21813 21638 21358 21767 21506 20779 20468 21578 20576 21117 20458 21732 20874 21152 23301 22135 21992 21282 22561 20934 22080 20918 22608 20819 21620 20765 22344 21348 21271 21521 21511 21814 20879 22224 20992 21920 20662 22635 20695 21544 20743 22571 20969 21308 21682 21595 21512 21307 21620 21481 21801 21104 22016 21063 21704 21150 21968 21175 21763 21193 22026 21116 21789 20950 22158 21244 21549 21157 21932 21335 21111 21405 21901 21248 21600 21321 21847 21380 21195 21449 21768 21369 21579 21476 21848 21398 21332 21469 21632 21433 21596 21563 21656 21309 21567 21591 21533 21388 21270 21606 21531 21210 21552 21550 21669 21242 21750 21208 21735 21145 21817 21179 22001 21201 22102 21074 21857 20953 22058 20938 21678 21227 22160 21146 21997 21159 22103 21079 21945 20976 21975 21209 21853 21142 21569 21606 21624 21270 21728 21526 21647 21262 21648 21478 21705 21227 21419 21694 21510 21317 21356 21738 21401 21336 21330 21745 21422 21335 21240 21881 20975 21616 21090 22204 20856 21800 21034 22471 20840 21971 20920 22445 20971 21872 21192 21961 21512 21836 21164 22057 21148 21776 21113 22104 21269 21704 21191 22042 21405 21774 21373 21862 21367 21888 21120 21953 21216 21921 20997 21900 21143 21762 21268 21905 21229 21753 21121 22023 21248 21761 21488 21775 21323 21825 21056 21937 21193 21941 21152 22128 21482 21813 21270 21757 21601 21635 21383 21447 21845 21532 21472 21536 21755 21616 21469 21492 21825 21736 21456 21660 21519 22268 21501 21879 21256 22343 21210 22010 21147 22194 21408 21927 21443 21836 21824 21538 21510 21575 21857 21640 21473 21692 21538 21841 21494 21569 21009 22319 21045 21849 21093 22154 21261 22105 21495 22110 21402 21974 21284 21749 21796 21746 21517 21629 21718 21552 21634 21563 21599 21928 21516 21747 21300 22256 21344 21872 21195 22190 21251 21911 21272 21793 21717 21627 21437 21541 21954 21559 21680 21569 21387 22099 21376 21721 20903 22672 20924 22083 20888 22409 21516 21952 21385 21788 22696 20939 21907 21007 22641 20950 21908 21136 22051 21696 21769 21141 21360 22886 20742 21957 20749 22791 20829 22114 20911 22414 21411 21991 21542 21677 22119 21367 21844 21172 22321 21225 21984 21260 22127 21655 21782 21510 21574 22008 21530 21677 21673 21744 21827 21572 21688 21336 22219 21344 21959 21120 22263 21389 21911 21480 21607 21863 21521 21517 21760 21504 22241 21136 22018 21230 22205 21421 21848 21425 21681 21921 21608 21504 21709 21528 22105 21374 21943 21127 22384 21052 22051 21141 22280 21329 21989 21317 21619 21760 21679 1455 9900 12418 13894 14382 15243 14906 15849 15157 43337 31970 27191 23884 24002 22675 23032 22251 22372 22064 22091 22375 22153 21879 22218 21805 22717 59 9494 13720 16891 16334 17741 16984 18104 17922 18278 36829 27676 24947 23671 22962 22798 20799 21931 21015 21719 21237 21416 21735 21382 21393 21424 21558 15636 18176 19351 19479 20480 19735 20410 19719 20667 20121 24905 22647 21719 22751 21219 21955 21099 22328 21677 21539 21420 21037 22694 20884 22023 21090 21810 19552 20065 20217 19905 21652 20003 21088 20453 20872 21264 22217 22038 20951 22796 20810 22016 21242 21669 22022 21048 21730 21078 21853 21345 21588 21327 21250 20755 20810 20951 21094 21068 21342 20787 21239 20798 23485 21817 21744 21436 21291 21681 21531 21333 21639 20954 22150 21111 21796 21280 21262 21725 21332 21326 21691 21201 22007 21031 21842 21061 21850 21388 21618 21214 21280 21648 21683 21218 21549 20876 22030 21229 21840 21072 21485 21641 21447 21209 21543 21321 21872 21154 21635 20896 22072 21123 21838 21180 21304 21646 21378 21431 21758 21455 21798 21056 21733 20870 22211 21015 21849 20945 21593 21592 21298 21349 21383 21632 21752 21376 21671 21159 22189 20992 21882 21177 21800 21325 21428 21237 21440 21489 21847 21168 21601 21111 21941 21161 21571 21244 21367 21648 21346 21411 21399 21677 21539 21158 21585 20934 21888 21299 21543 21213 21207 21888 21290 21592 21180 21372 22349 20832 21756 20886 22178 21175 21682 21158 20982 22413 20777 21765 21223 21335 21939 20862 21616 20625 22510 20780 21654 21123 21291 22330 20725 21617 20593 22378 21217 21248 21313 20600 22496 20936 21570 21532 21409 21918 21145 21574 20985 22097 21104 21773 20983 21368 21752 21256 21537 21275 21489 21813 21136 21575 21009 22129 20943 21769 21111 21885 21467 21557 21306 21289 21672 21319 21445 21553 21258 21858 20903 21833 21313 21964 21469 21541 21351 21335 21490 21659 21255 21648 20968 22221 20835 21920 21075 21639 21649 21383 21285 21468 21582 21641 21313 21624 20983 22151 20995 21820 21062 21623 21589 21430 21287 21596 21545 21766 21241 21752 20870 22202 21200 21767 21432 21583 21450 21414 21298 21284 21709 21683 21447 21751 21088 22039 20966 21824 21088 21565 21559 21412 21302 21251 21784 21618 21376 21568 21014 22061 21201 21700 21303 21651 21709 21380 21536 21373 21676 21688 21415 21632 20978 22243 21184 21828 21427 21422 22361 20983 21719 21027 21909 21742 21575 21303 21024 22587 20706 21905 20865 22253 21443 21480 21442 21043 22624 20787 21944 21558 21591 22328 20716 21808 20914 22296 21767 21398 21496 20631 22350 21135 21997 21024 21778 21780 21480 21637 21735 21425 22113 21248 21784 21276 21984 21632 21480 21457 21288 21814 21548 21562 21655 21026 22245 21103 21970 21201 21776 21831 21564 21514 21793 21622 22020 21318 21793 21214 22280 21272 22030 20995 21929 21645 21696 21506 21447 21833 21757 21465 21917 21363 22103 21328 21881 21128 22153 21304 21882 21347 21743 21716 21751 21420 21628 21812 21740 21536 22272 21426 22237 21074 21938 21285 22097 21605 21710 21312 21387 21783 21690 21569 21760 21443 22199 63 7996 11399 15031 14461 15691 15515 16978 16876 16838 35956 23040 23097 22609 22626 22401 11004 16646 16733 18025 17509 18842 17920 18707 18101 41536 29028 25062 23787 22999 23207 11255 19325 20250 19136 21344 19735 20517 19939 20268 27533 27561 24381 22535 23747 22501 10437 18301 19293 21229 19310 20809 19668 21254 20404 20731 27104 23369 24022 22277 22753 13372 19703 20812 21003 21074 21015 21526 21377 21285 21392 25741 23705 22198 22646 22039 22521 22223 22112 21940 22071 22117 22336 21749 22119 21350 22692 21440 22416 21520 21925 22074 21856 21805 22059 21936 22224 21748 22173 21282 22663 21353 22438 20893 22304 21907 21960 21721 21777 22016 21966 21683 22024 21432 22657 21257 22442 21474 22310 21704 22086 21314 21529 21904 21628 21637 21760 21781 22370 21057 22051 21109 22273 21352 22081 21391 21820 21843 21608 21432 21514 21763 21982 21468 21781 21147 22323 21168 21965 21622 21982 21653 21783 21495 21612 21811 21848 21512 21780 20800 22800 21131 21974 21463 21665 22333 21351 21527 20952 22505 21390 21999 21504 21352 22679 20979 21838 20763 22615 21184 22016 21145 20744 22796 20984 
22458 21754 21847 21128 21817 21621 22253 21524 21869 21398 21617 21168 21967 22004 22429 21813 21712 21297 21802 21716 22055 21509 21317 21223 21602 21604 22290 21993 22061 21446 21665 21445 22099 21841 21776 21251 21068 21345 22624 22679 22268 21024 20957 21528 22327 21832 21799 20659 21125 21048 21999 22811 22679 21811 21465 20756 21461 22103 22055 21536 21536 21473 21744 22254 21985 21724 21413 21605 21755 21814 21575 21705 21256 21769 22139 22258 21551 22048 21271 21635 21216 21915 21801 21968 21895 22145 21600 21750 21403 21959 21369 22387 21511 22235 21479 21659 21191 21889 21329 21873 21920 22073 21625 21703 21281 21857 21347 22214 21523 22237 21671 21783 21225 21718 21484 21824 21888 22177 21370 21616 21197 21809 21596 22353 21615 22600 21813 21916 21313 21073 20944 21505 22262 21764 22638 22289 22041 21787 21014 21083 21024 21221 21377 22827 21879 22709 21472 21044 20832 21587 21888 21771 22702 22139 22477 22177 21600 21339 21120 21340 21704 21546 21863 22109 22035 21900 21831 21459 21398 21713 21805 21700 22211 21773 22039 21582 21429 21416 21873 21959 22032 21963 21906 21507 10106 15762 17806 18376 19186 18848 19752 19233 19515 43325 26781 22593 22129 22106 22121 21629 21697 21182 21613 21353 22297 21480 22112 21447 21648 21167 21720 21504 21729 21930 22138 21715 21832 21125 21662 21476 22209 21511 22294 21463 21716 21171 21977 21620 21877 21900 22195 21504 21729 21209 21781 21876 22183 21472 22337 21575 21988 21394 21686 21498 21793 21902 22007 21536 21656 21258 22138 21604 22266 21620 21548 21312 21840 22005 22043 21690 21768 21138 21945 21496 22480 21686 22001 21250 21632 21837 21813 22283 22176 21301 21203 21308 22134 21607 22774 21490 21070 20853 21584 22650 22220 21363 20951 21201 22083 21642 22722 21719 21139 21456 21652 22716 22158 21357 21018 21181 22289 21789 22739 21905 21293 21505 21298 22204 21773 22023 21603 21468 21479 21669 22164 21842 21760 21499 21058 22150 21742 22049 21417 21547 21665 21868 21900 21824 21286 21681 21538 22360 21756 21645 21303 21168 22000 22033 21553 21672 21354 21910 21525 22367 21725 21673 21405 21936 21936 22112 21344 21696 21239 22104 21527 22264 21616 21616 21312 21895 21901 22063 21235 21648 21505 22342 21605 22075 21130 21815 21457 21968 21975 22034 21227 2330 17488 20314 19857 20149 19672 20397 20416 20667 20069 27600 22424 22744 21745 21990 21168 21824 21751 22072 21691 21697 21697 22247 21703 21810 21219 21756 22000 21983 21184 21640 21415 22372 21623 21575 21530 21935 21772 21560 21481 22312 21698 21637 21188 21945 22345 22079 20891 21088 21399 22631 21251 21080 21751 21933 22002 21265 20929 22493 21989 21768 20776 21478 22641 22232 21223 20983 21401 22941 21870 21132 20966 21617 22779 22050 20812 21283 21497 22696 21704 21416 21632 21581 22068 21517 21526 21757 21962 21747 21449 21523 22169 21825 21354 21742 21869 21781 21425 21607 22390 21435 21964 22000 21863 21264 21981 21687 21896 21348 21831 22007 21785 21535 22262 21479 21788 21934 22144 21321 21892 21655 22056 21241 21855 21920 21926 21248 22185 21728 21658 21349 21994 21749 21715 21308 22290 21675 21574 21399 21980 21738 21604 21472 22381 21504 21830 21779 22149 21217 21761 21482 22385 21442 21765 21876 21943 21265 22253 21831 21617 21460 21987 21360 21664 21359 22430 21400 21956 21897 22173 21124 22203 21728 21607 21568 22007 21552 21663 21406 22392 21317 21851 21881 21806 21349 22300 21721 21592 21605 22156 21374 21825 18052 20784 20243 21305 21200 20952 20346 21756 21064 35190 22777 22489 21145 21440 21735 22170 21069 21978 21784 20956 21542 22464 20730 21808 22644 21410 21504 22873 21003 22048 22627 21656 21312 22756 21804 21047 22235 22166 20850 21912 22130 21388 21632 21666 21986 21564 21934 21554 21619 21641 21796 21376 21764 21761 21489 21732 21922 21414 21800 21704 21472 21685 21712 21596 21948 21186 22037 21891 21377 21849 22003 21254 22147 21755 21632 21890 22028 21283 22274 21740 21575 21841 22082 21185 22301 21708 21600 21848 22115 21175 22274 21620 21799 21896 21941 21412 22289 21604 21569 21840 22116 21125 22190 21446 22005 21947 21845 21124 22364 21252 22290 21953 21748 21379 22376 21389 21953 21821 21529 21463 22448 21282 21797 21814 21776 21447 22440 21270 21856 21783 21656 21479 22144 21287 22004 21633 21689 21642 21910 21376 21916 21406 21876 21692 21567 21899 22008 21467 22407 21417 21559 22064 21736 21440 22228 21260 21875 21754 21389 21646 22043 21178 22225 21021 21888 22105 21026 22130 22168 20754 22676 21664 21493 22603 21328 21504 22773 20818 21592 22344 20998 21448 22136 20909 21875 21430 21472 22100 21084 21922 22234 14359 21210 21383 20948 21832 21063 21380 21804 21210 21337 23904 21932 22020 21457 22146 21835 21785 22093 21529 21634 21840 21450 21920 21284 22112 21842 21810 22009 21498 21667 21767 21767 22123 21336 22364 21541 21888 22009 21657 21544 22016 21377 22057 21228 22118 21413 21928 21673 21769 21601 21688 21788 22030 21425 22320 21206 21921 21442 22256 21525 21927 21936 21687 21498 21861 21587 22156 21255 22478 21376 21264 21875 21719 21505 21722 21808 22123 21314 22241 21320 21847 21719 21866 21709 21683 21824 22003 21422 22296 21252 22048 21140 22185 21614 21817 21881 21705 21490 21858 21717 22067 21359 22357 21294 21869 21372 22124 21707 21860 21991 21611 21556 21633 21673 22133 21441 22391 21200 21832 21321 22235 21559 21593 22249 21172 21801 21241 22129 21891 21289 22732 20700 21985 20981 22157 21826 21418 22162 21277 21977 21059 22702 21052 21504 21525 21971 22086 21307 22801 20823 22150 20849 22864 21090 21536 21812 21609 21937 21394 22263 21344 21927 21351 22105 21657 22162 21921 21671 21892 21430 22168 21529 21632 21786 21824 21851 21613 22320 21388 22053 21274 22325 21421 21755 21280 22121 21638 21256 21871 21714 21726 21634 21263 21490 21340 21553 21579 21880 21338 22113 21201 25895 21510 22465 21240 21992 21238 22320 21334 21925 21422 22200 21615 21290 21809 21834 21687 21816 21890 21769 21560 21673 21888 21817 21460 21848 21773 22072 21381 22105 21392 22213 21552 22044 21405 22112 21526 22480 21201 22069 21092 22373 21270 21985 21229 22436 21204 21921 21362 22219 21576 21778 21732 21888 21685 21729 21995 21665 21785 21800 21958 21768 21772 21824 21961 21723 21680 21775 21967 21623 21834 21719 22072 21462 21907 21334 22493 21077 22028 21196 22652 20984 21805 21157 22584 21322 21509 21811 21940 21981 21520 22437 21236 22311 21117 22360 21150 22301 21043 22823 20847 22063 20792 22902 20871 21769 21237 22151 21554 21699 21482 22112 21466 21856 21363 22192 21443 21763 21456 22199 21767 21900 21957 21909 21687 21799 21828 21963 21729 21769 21838 22083 21871 21735 22097 21760 22064 21632 21785 21619 21981 21600 21842 21584 22118 21404 21864 21261 22437 21355 21937 21224 22374 21344 22050 21089 22416 21220 21930 21170 22330 21267 22154 21175 22404 21225 22017 21096 22442 21254 22064 21140 22499 21144 22025 21277 22436 21159 22037 21254 22422 21276 22034 21319 22355 21136 22150 21274 22385 21171 22204 21228 22436 21236 22018 21191 22372 21186 22061 21240 22383 21232 22059 21261 22317 21321 21967 21392 22291 21313 22192 21272 22018 21701 21879 21486 21673 21953 21849 21521 21489 22208 21413 21880 21307 22424 21250 22016 21648 22115 21708 21811 21495 21331 22626 20867 22096 20903 22601 21232 21751 21483 21184 22596 21057 21797 21018 22672 20964 22061 21265 22583 21338 21543 21660 21156 22363 21585 21717 21497 22000 21526 21814 21611 22052 21778 21811 21724 21782 22087 21367 21824 21315 22227 21512 22033 21591 22056 21661 21906 21564 21881 21968 21739 21634 21600 21958 21605 21719 21746 21681 22058 21506 21889 21152 22296 21251 22087 21481 22029 21555 21932 21409 21800 21879 21585 21660 21681 21904 21714 21729 21835 21426 22208 21353 21913 21248 22362 21283 21994 21277 22277 21270 22147 21357 21865 21849 21885 21453 21746 21938 21774 21622 21627 21965 21784 21735 21808 21829 21954 21437 21936 21069 22416 21135 22077 21288 22296 21484 22119 21482 21825 21920 21569 21674 21857 21947 21818 21688 22272 21575 22240 21376 21963 21184 22320 21373 22009 21734 21586 21882 21667 21667 22197 21377 22327 21264 22003 21342 22250 21752 21818 21532 21175 22549 21125 21981 21447 22062 21963 21490 21676 20897 22795 20833 22231 20954 22724 21513 22074 21435 21504 16835 17772 19715 19040 20602 19299 20399 19630 20562 34733 23438 22159 21015 22850 20896 22291 21335 21761 22009 21666 21735 21261 22305 21322 21969 22039 1940 19244 20248 20522 20293 21056 20522 20961 20893 20833 28328 22403 22041 21392 22179 21501 21761 21772 21568 22106 21712 21833 21852 21591 22341 21264 22054 13365 20724 20551 21207 20096 21370 21303 20932 21015 21021 24721 22348 21776 21901 21365 22318 21230 22042 21255 22319 21363 22093 21409 21693 21901 21690 21675 18878 21003 21390 21274 21495 20881 22112 20993 21733 41594 23377 21809 22003 21484 21680 21859 21649 21697 21897 21742 22400 21350 22171 21486 22030 21720 21764 20441 21411 21591 21495 21424 21770 21276 22208 21095 26050 21592 22349 21632 21904 21634 21544 21922 21784 21529 22029 21281 22248 21610 21984 21529 21574 21996 21739 21680 21892 21671 22386 21186 22154 21462 21993 21991 21618 21655 21558 21952 21920 21399 22009 20978 22544 21412 21753 21508 21210 22650 20893 22097 21418 21736 22372 20975 21911 20864 22796 21640 21577 21479 21115 22701 20920 22080 21487 21952 22351 21053 21912 20914 22833 21117 22063 21527 21504 22231 21464 21976 21468 22131 21549 21955 21543 21612 22163 21393 21904 21768 21728 22055 21404 21928 21776 21856 21973 21603 21741 21586 21904 21781 21677 21822 21321 22301 21281 22005 21381 21921 21892 21649 21701 21777 21925 21938 21637 21863 21281 22336 21213 22084 21483 21757 21931 21745 21607 21595 21939 21815 21669 21892 21345 22429 21221 22100 21319 22135 21834 21809 21511 21672 21942 21834 21638 22043 21512 22305 21304 21946 21258 22216 21520 21998 21559 21592 21984 21641 21704 21909 21613 22096 21408 22002 21104 22452 21282 22104 21431 21649 21910 21726 21680 21991 21792 21988 21478 21987 21128 22447 21319 22047 21687 22099 21765 21828 21544 21527 21970 21665 21750 21681 21380 22273 21216 22051 21643 21804 22071 21431 21685 21219 22136 21875 21521 21767 20802 22896 20833 21880 21351 21536 22439 20948 21938 21389 22362 21809 21353 21585 20871 22659 21480 22016 21344 21249 22653 20920 22032 21488 22144 21975 21437 21751 21015 22197 21573 21843 22002 21646 22066 21493 21845 21367 22216 21497 22003 21623 21641 22156 21496 21831 21496 21650 22134 21361 21899 21437 22124 21627 21829 21525 21427 22071 21757 21795 22001 21459 22272 21220 21981 21291 22169 21514 21913 21544 21605 21943 21588 21831 21911 21446 22330 21220 22099 21241 22298 21376 22105 21453 21869 21881 21739 21690 21769 21866 21915 21645 21873 21258 22425 21182 22136 21579 21993 21756 21706 21606 21748 21777 22084 21569 21922 21164 22301 21197 22109 21420 21632 21942 21847 21598 21857 21275 22444 21203 22120 21515 22049 21703 21826 21492 21620 21930 21888 21602 21806 21307 22311 21326 22064 21916 21739 21978 21574 21707 21737 21776 22009 21472 22030 21120 22499 21336 22168 20851 21708 22144 21315 21788 21037 22698 21166 22041 21440 21868 22298 20850 22180 21006 22582 21527 22031 21312 21575 22455 21096 21925 21059 22452 21388 22013 21525 20882 22871 21183 21794 21609 21928 21927 21632 21691 21304 22204 21477 21911 22037 10105 18362 19313 19892 19677 20428 19957 20114 20468 20414 27393 22750 21902 21383 22200 27 19248 20043 20626 20817 20647 20615 20692 21140 20800 28115 22445 21775 22404 21304 22045 18537 20789 20837 21172 20853 21027 21349 21114 21146 30944 22566 22631 21453 22064 21285 19301 20481 21536 20946 21488 21592 21408 21256 21368 21540 23031 21849 22085 21477 22436 17924 21620 20704 21872 21601 21568 21368 21760 21680 21664 22667 22090 21369 22439 21227 22251 21335 21810 21970 21636 21728 21926 21728 21955 21414 21891 21101 22432 21259 22020 21476 21548 22092 21409 21790 21500 21956 22129 21264 21959 20874 22871 20997 22205 21205 21808 22442 21065 21851 21175 22266 21620 21647 21661 20889 22893 20738 22240 21303 22330 21666 21620 21659 21389 22187 21339 21971 22054 21739 21985 21563 21689 21543 22049 21697 21847 22132 21666 21954 21355 22026 21411 21929 21721 21872 21577 21498 21921 21644 21772 21959 21679 22172 21175 21971 21271 22281 21588 21849 21546 21589 21964 21685 21632 21912 21676 22076 21561 21987 21155 22311 21257 22035 21769 21980 21632 21763 21431 21683 21911 21831 21458 21952 21210 
43433 36215 36883 38983 36567 34336 41267 33216 37030 41861 34455 39248 38440 38610 43126 36698 35141 40667 36419 35293 39047 32961 41000 40505 34167 33888 41160 38696 39268 42534 34925 42258 39750 36816 35760 40224 38632 41349 34711 35241 41385 37975 37481 33048 41792 36768 36335 34091 38946 38272 38784 36893 35339 36337 42630 35174 42480 39936 39257 33152 32832 42387 35815 41312 38472 35596 41963 34380 35890 36365 33784 35105 40128 35990 40112 41060 35843 33758 41226 38535 37968 38136 42570 35974 39993 36912 36092 41792 37668 37350 41168 35823 34666 37688 42641 38081 38636 38937 38852 41665 42967 35179 33058 39035 43148 36611 40984 35202 34534 41804 35811 34880 40192 35547 42800 36583 36983 40260 41845 34310 39892 36401 33992 41928 34704 34140 36294 37496 40920 38612 37072 32707 41174 35878 34922 41217 39017 36252 37771 38784 37841 40248 41669 37238 37337 35660 42411 38358 35820 33812 36866 35959 35608 40074 43718 40564 34028 41256 38966 41440 35360 33280 36937 39759 38885 37415 36713 42527 42130 35506 36361 35061 40640 36169 38861 33993 42092 42244 37248 38167 38601 38257 37361 32820 34388 33783 34391 40229 39085 35193 34763 39137 32480 41493 38326 34240 39692 39739 39960 34700 34947 39745 34480 41389 41733 42981 39773 42653 34608 39634 35489 32502 35275 37624 40064 35520 36464 39010 34904 42525 40880 33191 41281 42924 35572 39529 38368 34312 37088 37344 40623 32768 35266 39975 36135 36962 40529 42696 42158 34080 38178 41744 35252 42923 36323 37420 38775 33124 34352 40224 40168 34183 41265 34442 33259 40608 36684 38625 39040 35177 35648 39042 38033 42968 43610 35352 38415 40211 34296 36691 36410 41402 40343 41048 40138 41152 40167 34420 36334 42752 38856 36320 33617 34880 40747 41774 37558 39888 39467 34581 35548 35453 39138 42448 34752 35654 40140 41792 38080 39911 41486 36435 35968 37264 40916 32904 40569 40858 36192 38656 34162 42512 43170 35115 40016 36784 35522 43045 38628 40104 35976 38786 42185 33749 34512 36984 37332 36346 40657 35059 33041 41960 36160 34544 40882 39699 38497 38729 33444 34580 41367 37651 33129 42341 35880 34816 41936 37827 37632 39544 41303 35136 40424 39662 33345 41121 34288 33959 40635 37527 37484 39346 40449 34500 32548 41802 34373 39236 39183 36631 42416 38231 38400 38704 40422 22992 30064 40609 36171 39268 34167 41760 42041 34465 38336 46656 43239 36289 35672 38353 39447 36450 35940 39097 35292 34978 34923 41172 35520 36182 40112 36074 38343 38608 39610 34457 42024 42550 34742 33687 32968 37792 35917 33402 42631 41876 35288 34296 39554 37997 42137 39738 36747 38520 42055 35108 40160 38680 36036 37831 38499 40393 37065 43783 38749 35803 35109 42667 35115 40820 40466 37912 41964 38508 37272 39128 37549 34232 36496 38797 35766 40608 43232 35676 35082 41872 34361 33792 38929 33154 32892 35854 38042 35830 42371 33362 40103 36583 41488 36032 37175 36004 42028 34485 42502 42691 38351 38448 37179 40253 38589 35234 37098 41328 36892 38741 36135 33357 41179 43095 36384 37838 39799 41241 37330 34753 38820 40524 37267 37416 37674 40071 40608 35548 34580 41323 38688 35912 35319 40901 41511 35220 33607 41768 38545 35744 33941 42326 42885 32896 36407 35906 39995 40165 35789 42760 42752 42530 36036 37064 37974 40374 41528 36918 34188 42322 38634 41456 34756 41664 43264 42112 38138 37365 40448 39092 40873 35560 34169 33298 38582 33329 34744 41928 42800 41344 37168 37267 36423 41436 41780 35712 33802 33984 39962 41984 36666 36979 35157 40039 41011 39922 37305 41400 36133 38296 36497 36508 43586 39591 42272 36000 40187 38758 38377 35994 37287 33320 42865 35168 36060 34816 41748 32810 37288 37780 38656 34803 34425 40656 36312 36262 38294 41216 40405 36224 37392 39843 41872 34362 34544 38131 33676 37721 33381 34143 34309 35963 41321 35892 35589 42733 35781 37448 42060 36388 35114 42395 35304 35078 33920 37827 39686 38926 37305 41527 37046 38609 40364 40144 36154 34091 36967 38685 40727 41322 35909 33766 36503 39187 39746 41816 35533 33798 36601 39708 39866 41283 34448 36208 37154 37880 41964 41568 34256 33405 36373 39622 39168 40710 42597 38865 38124 36848 38981 42417 40440 41442 38090 35768 41544 42588 42163 38112 36690 33112 42488 43222 40845 36381 36389 35712 42420 43232 40792 36915 36121 34502 42744 40008 40960 38700 34322 34952 34352 37315 41399 37760 42089 37318 35160 33735 37264 38587 42832 43032 42419 33943 38801 35637 42040 41084 40586 37333 35901 41784 34839 38848 39792 40964 38197 37060 39642 37968 39873 40278 35025 35050 34439 42810 34792 40867 32754 36256 35616 33799 41793 37824 42386 40136 37019 37190 42224 42800 39726 38807 37616 41059 29106 39688 41895 37368 36554 38471 41610 36515 40033 41464 38546 37810 38518 42513 40139 36891 36036 39525 33267 34056 36391 42395 37648 40602 39665 36772 36251 38657 43109 35072 35817 35856 39885 41335 42540 33576 36818 38684 34743 33128 38133 41548 39256 40384 39920 42187 37837 34916 35746 33942 34817 36005 38738 42173 41867 40212 37680 42274 41360 33309 37583 37641 35158 42920 37251 33896 39975 40536 43760 41728 40580 37340 35540 32640 35244 36089 39889 41031 41216 41203 37097 35541 36976 35421 34920 36240 38568 42311 41669 40417 38890 39218 40576 34520 36374 37236 35265 42714 37088 35429 39089 41872 42464 41168 37404 41763 40068 35523 36801 38534 34369 33291 34038 34731 39856 42375 42999 40016 36673 41088 41339 33856 33829 41048 39717 36400 40406 39996 37330 40759 36096 34503 38186 37676 40272 36569 42103 40276 40884 38480 38436 35728 38253 32664 32824 38020 39386 41201 36663 35920 39976 36208 37137 38631 33121 36108 34151 37596 41728 41704 41410 37993 41600 39825 34788 39895 37632 34963 37049 42240 40395 33312 33952 35907 36279 36935 34336 41472 41961 39237 40664 42055 42505 36273 40384 39969 34528 40249 37451 35289 35554 34165 40469 42994 41649 33600 33696 37003 41312 39808 39977 39142 32959 42995 40602 38560 40456 41782 41480 37868 42280 40787 34656 40758 36451 36609 35153 36264 37070 35829 33429 34681 36891 36460 42448 36973 36021 39095 41744 39844 41729 41015 33440 38720 42145 39728 33225 43078 40124 39360 38773 42512 40759 38466 40449 43087 40163 37664 41524 41156 33840 35697 35445 36918 35038 35385 38522 34731 35971 36103 37993 35776 35846 36277 38054 35628 34717 36000 38298 34519 36537 35511 39059 42694 37686 41300 43993 38912 38787 39968 35228 37496 36465 39398 34231 40947 33070 36182 37732 38457 32856 42779 40564 41962 39440 42273 39717 41821 38401 37004 36343 39296 35477 37764 36397 35840 40341 40272 33529 35019 42709 39757 42784 37009 41621 40553 42533 36016 42263 40978 36104 37308 38020 37509 35172 36245 36427 38167 35538 35793 36720 39312 37423 35754 39325 35633 38876 34208 35928 34245 38324 33926 36503 33618 39612 42055 37184 40512 43222 41912 37961 40168 42562 41448 39062 38732 42656 40336 37877 39520 42048 40695 40267 39908 42664 40501 38628 38811 43173 40580 39129 39226 43830 39489 38788 40790 43119 39813 38953 40384 43008 40883 38828 41267 42403 39237 40122 40704 42653 39863 40855 40464 43089 40583 38615 39988 42448 39900 39347 40448 42906 40411 39328 40624 42052 41360 38552 41671 41658 41144 40555 40631 38592 35312 37225 42992 35139 37808 36874 32923 42565 40752 42230 37427 41088 42969 40448 38485 34414 39586 35432 36296 43031 41495 34842 36112 39272 36897 34368 40026 36068 42897 39792 34384 38112 36272 37842 35010 37225 39221 40456 34439 41179 33602 34547 39187 42507 34033 35292 42908 38648 33168 36252 34272 38741 35930 36336 35481 35923 39424 41867 36564 41008 41120 33010 38464 34094 38800 34911 37216 33632 37101 37978 35840 34184 33728 37872 34171 35401 35609 34816 38944 32784 36912 39157 41520 40472 39648 42956 39060 33593 37596 41914 36367 37299 33772 34575 34747 37108 35254 35416 36666 42059 40740 41687 37740 40068 42437 40919 38680 40792 41472 40704 40160 41808 37260 36875 37400 42629 35933 37672 36022 34333 34387 38114 35980 35716 36105 36548 37856 42496 37848 38649 42639 39620 39540 40777 41602 43120 40153 42999 36699 37412 33563 34724 36738 38027 36519 34960 40832 33998 40746 41568 38407 39616 41729 42100 38928 35664 33690 37113 34772 34674 40425 41664 42208 40485 38752 41561 41423 36002 36419 33157 39552 33845 38887 38537 42585 39437 38317 42865 35193 36438 36556 35840 41040 37484 35728 32867 39041 42516 32682 34027 34036 34328 37120 33432 39936 42190 33959 32633 41705 43674 40645 38103 37112 36422 41409 41600 35844 38633 34741 35638 40434 41688 41330 38290 38872 29004 39124 40199 32552 40504 38278 32442 37088 36665 35840 44576 42947 39136 41693 40599 43376 35936 35857 33372 39448 35276 36561 36870 34016 41880 40460 39163 28672 34359 32688 39905 38705 41793 41232 37104 37955 38068 36178 42070 35976 37409 41650 42103 40621 39042 40505 42166 41858 39808 42038 35481 37398 35098 34913 35672 37730 41880 40784 43288 36594 39489 37584 35683 43329 43020 36525 38576 42944 35035 36888 34432 34965 37210 35843 42283 41698 40616 43160 39060 35498 35604 42240 42265 34295 42920 42297 36069 40545 40674 39067 40643 34048 42080 34381 37077 34246 33104 37333 35968 33088 38615 40617 41270 34402 38055 33203 33489 38362 35857 34722 37008 34931 42346 39894 40210 42741 38740 38630 34261 34601 33392 37600 37441 41975 38928 37600 33457 41764 36086 32708 39833 35187 36593 39408 42230 35792 42256 37975 37632 36038 36444 34322 33600 42700 39400 35777 36771 39100 43187 38030 42399 38669 37499 36752 36873 39216 39400 33320 32368 40860 42712 38450 42752 40192 33680 37850 33447 34039 40032 41849 37417 35751 35299 39024 42038 37836 35757 36684 38223 34156 35712 33702 37047 36014 34976 36530 41072 41884 40778 38823 41756 37712 37179 34458 35100 35760 37606 37738 34423 36999 40527 41935 40431 39424 43060 36323 37804 35719 34201 33943 37696 36556 34807 37027 41299 43272 40480 39635 41288 40291 36793 36268 32936 34559 37754 36658 34385 38784 32884 41312 41032 38118 40400 40880 33019 38449 33718 33684 38028 34485 35040 37352 34358 39181 41904 38709 38812 43200 40840 39683 42501 34713 37358 35640 34715 38410 36012 38287 42825 38656 39064 43441 41484 39328 35234 39432 35936 36423 33220 32994 37897 34701 35741 34833 41416 41328 40135 39105 34634 36185 39277 42458 35310 40092 40048 37319 32943 35724 35388 37490 35906 37089 41571 33241 42944 37378 37760 41908 42513 36536 41472 33999 36224 34920 42612 38560 41272 40339 35372 36747 38536 42770 40000 38507 42514 36214 37916 40654 33888 36623 38416 34648 38936 43058 37080 41766 40936 43221 38887 34560 34321 39970 43064 36978 42983 34722 39864 41627 37641 42488 40103 34672 36484 33052 42000 39530 36171 36144 38417 42610 41282 40271 38599 40951 40454 33098 37344 33257 33936 37835 33840 36567 37536 42392 42187 40315 39704 40576 41713 41620 39849 42736 37460 37297 35799 35052 35732 36992 37624 34634 36946 40332 43051 40112 40073 33984 38353 36000 35200 34065 35570 35799 39184 33658 37361 39552 41797 40228 39942 42299 34374 37759 36951 34133 36717 40641 43296 40253 39872 33164 38658 35408 36352 42817 34508 37602 37022 33976 36276 41013 41984 41508 39140 37586 35802 38229 33753 35237 35604 35684 38635 42572 39051 38888 43802 41541 40373 36473 35255 39691 41130 36314 38203 35552 39578 38969 42240 37304 41568 36258 40278 37986 34186 33073 38700 40872 33991 43183 38998 37779 38392 43171 42071 39075 33191 36136 37488 39990 36208 34160 37467 37796 34153 35075 40736 40888 42976 37848 38756 34675 40224 40353 36609 34315 41990 37553 38793 42580 42556 44556 36608 37449 41777 40776 18376 38456 38269 33523 35504 33854 33371 34157 38995 35432 42400 43524 36412 42484 41092 39058 32152 35221 35915 39467 36341 37943 41496 39241 39416 41681 34152 34736 42448 39195 40808 40339 31882 32775 36888 42677 34144 41617 40480 41768 33457 39180 36953 39354 42883 43208 35829 34189 34337 36821 33976 33266 41403 35721 34712 34440 35063 39312 41808 43383 40661 41511 41626 36475 38067 34324 35256 37548 35384 37917 42074 37437 39017 42848 40750 38640 42741 33677 39305 42005 36455 43029 38169 39890 40373 38304 36370 37497 37658 40843 40177 36288 43044 38704 37063 39762 41536 34474 34576 34704 36412 37796 34690 40794 41192 42112 34926 34123 34642 41718 40787 41604 38415 38965 35872 38233 33756 34944 33302 38664 35141 36822 39762 34781 37785 41640 38859 42096 37938 35529 36871 33744 42816 37765 34529 35784 38067 35181 40225 39897 38344 40680 41509 34032 36714 33344 33728 37976 35072 34051 37254 34925 39194 33687 38257 39451 41913 40580 38929 35881 38272 34178 35620 42295 35228 37497 36732 42411 38016 40099 
23319 23362 22632 23192 22800 23597 22941 23267 22635 23269 22532 23296 23175 23736 23382 23325 22778 23136 22973 23500 23003 23096 22800 22884 22931 23527 23456 23625 22737 23079 22919 23342 23107 23091 22760 22631 22494 23503 23978 23856 22886 22314 22665 23599 23460 23105 22827 22755 22260 23014 23841 24117 23444 22752 22294 22656 23247 23521 23077 22785 22700 22866 23631 23397 23226 22660 22956 22946 23276 22824 22711 22756 22954 23112 23570 23104 23082 22622 23209 23094 23319 23008 22797 22583 22967 23016 23639 23237 23399 22653 22877 22825 23398 22723 23028 22567 23091 23089 23670 22885 22996 22702 23468 22775 23160 22645 22914 22867 23588 23082 23325 22493 23229 22890 23232 22447 22905 22465 23369 23255 23349 22640 22914 22980 23372 22705 23017 22421 23386 23112 23581 22794 23013 22656 23214 22885 23073 22667 22771 22839 23593 23180 23168 22606 23213 23090 23128 22632 22912 23204 22624 22419 22617 22780 23300 22982 24129 23383 23426 23375 23018 23126 22666 23168 22956 23552 23076 23623 23296 23256 23067 22877 22899 23113 23339 23351 23263 23376 22765 23040 22648 23431 22953 54 7340 11063 11943 13115 12999 13284 13246 14216 14174 36795 29262 26724 25303 25415 24621 25270 24410 24924 24075 24359 23610 24388 23928 24238 23933 24249 23645 23910 23121 23851 23760 24142 23409 24273 23500 23707 23192 23864 23509 23735 23619 23893 23278 23527 22917 23603 23255 24045 23310 23943 23333 23629 22941 23471 23107 23605 23506 23799 23354 23524 22823 23354 23132 23966 23301 23712 22912 23426 23309 23525 23542 23609 22912 23298 22752 23785 23249 23764 22983 23273 23153 23393 23632 23584 22932 23116 22624 23383 23151 24327 23602 23151 22327 22776 23040 23506 23997 23255 22519 22757 22961 24329 23603 23264 22513 22644 23436 23540 23552 22953 22488 22996 22955 24293 23608 23185 22448 22759 23325 23063 23680 23127 23072 22732 23112 23216 23419 23435 23194 22771 23157 22920 23693 23040 23029 22797 23156 23419 23375 23086 23086 22875 23520 23015 23644 22872 23017 22935 23235 23317 23440 22684 23169 22864 23760 23101 23384 22784 23042 22922 23333 23173 23269 22531 23256 22773 23756 23027 23339 22627 23133 22887 23446 23214 23302 22689 23251 22899 23684 22935 23065 22513 23326 23289 23554 22936 23212 22721 23420 22855 23648 7657 12938 14537 15459 15844 16201 15596 16235 15995 17157 27840 25740 24408 24670 24335 24322 23523 23687 23078 24149 23485 23447 23047 23507 23695 23672 22833 23305 23045 23794 23054 23072 22979 23360 23479 23164 23001 23825 23204 23084 22753 23264 23595 23523 22432 22956 23043 24038 23168 22488 23605 23511 23392 22535 22820 23994 23496 23377 22370 22573 24102 23528 22471 22600 22904 24304 23168 22545 22658 23105 23972 23193 22397 22981 23149 23959 22670 22466 23204 23095 23502 22844 22917 23179 23428 22995 22975 22208 23579 23059 22896 22965 23144 23276 22996 23008 23607 23109 22859 23157 23381 22773 23071 22849 23416 22615 22611 23305 23303 22625 23396 23059 22976 22995 23473 22721 23089 22848 23540 22668 23159 23309 23447 22594 23193 22869 23348 22528 23207 23152 23049 22681 23655 22913 23169 22607 23281 23136 23192 22781 23563 22952 22976 22900 23397 22752 23093 22676 23732 22735 23066 23019 23470 22451 23383 22923 23257 22554 23121 23159 23088 22730 23670 22813 23085 22865 23413 22659 23125 22728 23367 22468 23160 23104 22938 22631 23563 22969 22926 23059 23335 22613 23104 22961 23063 22551 23050 23024 22925 22788 23616 50 16544 17537 18119 17340 18608 18279 18485 17975 18713 28704 24451 23879 24743 22993 23340 24333 23012 22997 24352 23152 22708 23851 23636 22353 23558 23519 22592 22839 23532 22295 23264 23431 22759 22439 23064 23232 22318 22856 23672 22254 23227 23504 22822 23031 23330 22984 22807 23557 22807 22942 23285 23031 22770 23525 22837 22959 23361 23067 22854 23600 22883 23001 23249 23014 22730 23434 22592 23116 22959 23001 22850 23317 22497 23131 22823 22965 22779 23361 22481 23110 22894 23006 22813 23251 22505 23150 22912 22995 22721 23463 22491 23314 22551 23104 22787 23248 22504 23128 22861 22942 22760 23324 22578 23394 22414 23309 22872 22931 22791 23340 22359 23472 22929 22884 22840 23347 22401 23445 22938 22731 22961 23379 22409 23542 22887 23032 22946 23576 22548 23611 22818 23047 23241 23124 22673 23513 22744 22983 23218 23079 22810 23493 22436 22976 22760 22964 22885 23025 22724 23171 22464 23228 22921 22712 23174 23246 22408 23575 22901 22852 23664 22575 22716 23779 22146 22863 23340 22288 22889 23055 22385 23302 22405 23051 23276 22290 23482 23317 22208 23869 23040 22358 23869 22878 22670 23875 22220 22718 23484 22176 22680 18551 19195 19712 19893 20129 20455 19751 20835 20265 40072 24776 23672 23271 23504 22908 23359 22743 23491 23079 23046 23286 23041 22249 23484 22576 23197 22711 23417 22930 23094 23221 22928 22785 23155 22859 23380 22513 23407 22924 23024 23266 22987 22750 23371 22512 23419 22567 23584 22575 23097 22954 23000 22824 22992 23040 23202 22793 23495 22593 23308 22423 23477 22789 23067 23115 22928 22625 23245 22725 23341 22342 23550 22734 23169 22976 22968 22807 23139 22745 23302 22589 23526 22549 23144 22820 23079 22804 22860 23030 23202 22087 23448 22382 23243 22662 23385 22861 23191 23123 22887 22772 22999 22757 23175 22730 23413 22480 23113 22497 23290 22956 23088 23113 22753 22779 22966 22960 23232 22573 23511 22648 23301 22125 23704 22650 22732 23380 22391 23081 22290 23503 22933 22456 23799 22057 23137 22156 23881 22396 22818 22858 23127 23106 22541 23748 22240 23123 22432 23424 22492 22672 22921 22819 23344 22391 23959 22648 22784 22958 22931 23244 22521 23316 22557 23184 22465 23415 22637 22941 22791 23188 23104 22817 23197 22745 22824 22748 23048 22864 22637 22978 22893 23181 22768 23352 22453 23117 22365 23493 22435 23081 16433 21465 21419 21629 21653 21573 21516 21568 21915 21665 23808 23435 22999 23396 22356 23476 22585 23364 22684 23511 22478 23280 22346 23533 22521 23056 22598 23284 22717 23066 22730 23192 22732 22972 23035 22934 22764 22848 23045 22911 22624 22816 23115 22891 22693 22800 22951 23172 22592 23320 22592 23296 22808 23346 22776 23266 22698 23451 22477 23184 22432 23508 22455 23092 22428 23376 22518 23094 22429 23486 22549 23110 22504 23459 22642 23002 22510 23331 22562 23073 22192 23608 22548 23047 22276 23760 22608 22903 22603 23354 22901 23203 23271 22624 23179 22517 23828 22130 23061 22276 23835 22233 22864 22336 23793 22335 22804 22569 23321 22850 22629 23069 22933 23079 22588 23137 23064 22882 22924 22798 23181 22751 22940 22720 23172 22810 22898 22648 23296 22585 23002 22530 23425 22446 22990 22417 23503 22485 23033 22377 23427 22454 23186 22457 23512 22441 23286 22405 23541 22400 23212 22466 23448 22455 23239 22464 23289 22608 23285 22549 23265 22592 23258 22572 23299 22733 23271 22386 23260 22637 23053 22587 22927 22909 23128 22572 23185 22753 23111 22482 23115 22773 23113 22541 23062 22903 23062 22557 23040 22799 23076 22670 23056 22873 23027 22488 23239 22887 23105 22624 23232 22720 23220 22556 23000 22895 22959 22625 22937 22902 23048 22551 23013 22902 23119 22634 22771 23124 22737 22753 22688 23062 22805 22872 22992 22936 22808 22978 22990 23014 22888 22926 22887 22224 23696 22287 23082 22006 23953 21915 23214 22167 23781 22357 23267 22563 22298 23697 22304 23168 22548 23269 22915 22969 23113 22966 23120 22546 22768 22284 23737 22028 23360 22354 23437 22850 22873 23006 22643 23229 22467 22925 22496 23335 22503 23020 22518 23269 22634 22983 22630 22895 23026 22821 22659 22690 23097 22759 22752 22677 23010 22808 22819 22854 22585 23272 22490 23029 22299 23460 22351 23193 22631 23036 22853 22841 22606 22658 23013 22733 22678 22834 22892 23054 22698 23065 22371 23501 22343 23279 22308 23400 22475 23221 22668 23241 22674 23085 22496 22883 22892 22996 22638 22837 22891 23029 22689 23224 22785 23095 22740 23016 22471 23291 22467 23002 22218 23360 22307 23244 22695 23253 22712 23096 22436 22775 22940 22760 22686 22935 22901 23189 22533 22988 22318 23383 22415 23040 22347 23383 22544 23153 22627 22888 22969 22795 22680 22748 22835 23316 22575 22969 22385 23360 22540 23002 22675 22631 23190 22558 22871 22649 23043 23160 22528 22903 22051 23899 21940 23367 22519 23261 22839 22848 22596 22496 23596 22196 23137 22352 55 7895 9910 11639 11861 13536 12297 13304 12551 14571 32256 28256 25787 25618 25404 24212 24335 23470 24562 23617 24221 23701 23867 23808 23617 23483 23464 9499 14295 15689 16027 16173 16896 16320 16827 16460 17487 28731 26588 25545 24880 24765 24460 24311 24256 23911 24435 23604 24117 23468 24261 23713 23845 23463 15201 17588 17947 18195 18500 18781 18938 18764 19018 38404 27090 24851 25079 23985 24812 23765 24384 23625 23924 23917 23815 23578 23959 23592 24014 23433 23818 18583 20597 19768 20771 20259 20960 20511 20806 20354 28068 24920 24288 23896 24225 23782 24121 23386 23860 23021 24211 23317 23662 23298 23382 23632 23559 16951 21799 21785 22340 21669 22183 21325 22558 21658 22321 24392 23719 23914 23449 23450 23581 23055 24025 22962 23705 23217 23334 23639 23220 23373 23543 23296 23761 23012 23542 22912 23751 23316 23388 23159 23137 23597 23281 23291 23301 22628 24216 22611 23674 23043 22912 24124 22537 23635 23192 23618 23421 22809 23376 22472 24221 22686 23728 23079 22939 24039 22548 23546 23029 23363 23674 22692 23242 22482 24337 22600 23594 23040 22954 24010 22564 23431 22679 23538 23062 23402 22951 23120 23377 23048 23204 23160 23354 23514 23012 23175 22748 23644 23030 23113 23025 22972 23454 23255 23037 23201 22902 23704 22792 23461 22881 23437 23059 23364 22806 22963 23251 23228 22962 23251 22665 23786 22690 23466 22846 23607 22938 23337 22976 23092 23200 23368 22951 23254 22720 23745 22612 23500 22567 23639 23052 23202 22882 22997 23277 23217 22989 22912 22830 23759 22711 23377 22599 23728 22689 23531 22822 23008 23242 22986 23040 22969 22865 23530 22839 23272 22593 23780 22691 23594 22813 23330 23041 23120 22928 23330 23024 23463 22716 23271 22442 23676 22663 23374 22969 23417 23040 23203 22829 22893 23292 22933 23108 23377 22807 23528 22676 23281 22605 23496 23064 23181 22880 22804 23296 23056 22967 23066 22247 24097 22326 23559 22729 23356 23256 22390 23333 22542 23589 23059 22961 23011 22370 24035 22158 23533 22595 23348 23888 22336 23298 22695 23413 23344 22831 22977 22303 24096 22294 23515 22789 22757 23523 22697 23234 22649 23466 22688 23275 22859 22923 23336 22839 22993 22944 23223 23085 22801 23158 22575 23548 22813 23248 22769 22937 23279 22893 22977 23176 22903 23355 22632 23149 22575 23498 22855 23281 22692 23004 23138 22912 22901 23240 22919 23397 22557 23191 22464 23517 22788 23312 22691 22976 23073 22950 22786 22954 23084 23089 22880 23157 22496 23627 22505 23431 22508 23559 22940 23126 22689 22908 23080 23204 22791 23184 22414 23575 22474 23336 22890 23040 23118 23022 22898 22849 22741 23354 22596 23267 22636 23456 22729 23241 22661 22789 23209 22940 22909 22401 22758 23530 22528 23275 22685 23214 22976 22951 22838 22854 23088 23137 22756 23098 22456 23537 22424 23347 22757 22740 23398 22679 22966 22407 23596 22426 23061 23284 22667 23634 22305 23152 22148 23968 22497 23010 22683 22439 23837 22277 23155 22279 23662 22737 23089 22776 22543 23840 22230 23189 22337 23320 23186 22842 22890 22513 23454 22505 23244 22856 23141 23017 22871 22856 22791 4964 9268 11367 12895 12588 13307 12995 13482 12979 43642 30972 27760 25973 25735 24911 10032 14848 15792 16560 16759 16701 16969 16773 17493 16770 29808 26100 26266 24928 25133 9579 17614 18263 18521 18631 19400 18519 19638 18583 19503 27991 26498 24775 25036 24106 24387 19895 20652 20586 20987 20875 21069 20800 21106 20531 28648 24420 24675 23736 24453 24049 21417 21869 22183 22311 22323 22099 22304 21667 22772 21617 24471 23550 23997 23665 23596 23417 23553 23680 23735 23409 23616 22928 24068 23008 23719 23322 23652 23533 23440 23392 23431 23335 23676 23095 23479 22583 24368 22619 23881 23225 23389 23997 22673 23381 22630 24080 23127 23369 23255 22800 24324 22377 23722 22818 23348 23671 22989 23175 22551 24245 22530 23690 22911 23552 23203 23332 23118 23212 23481 23195 23328 23244 23046 23631 22917 23375 22820 23771 22934 23230 23024 23062 23406 23034 23282 23341 23127 23597 22889 23364 22731 23729 22929 23383 22912 23108 23383 23137 23125 23266 22967 23642 22729 23501 22592 23831 22613 23538 22908 23252 23191 23176 22916 23127 23312 23192 22978 23367 22869 23705 22547 23524 22912 23504 
22455 22065 22220 22146 22925 22951 23048 22617 22312 22103 22415 22487 22632 22492 22550 22375 22216 22066 22944 22784 23008 22304 22339 21981 22776 22416 22721 22016 22353 21760 22818 22532 23296 22256 22464 21912 22752 22397 22769 21935 22775 21719 22826 22620 23224 22374 22897 21801 22617 22189 22982 21895 22603 21690 22604 22217 23275 22512 23040 21776 22473 22325 22942 22095 22732 21565 22616 22326 23320 22141 22642 21762 22777 22421 22817 21996 22445 21696 22883 22535 23313 22336 22556 21752 22683 22305 22877 22096 22323 21649 22407 22101 23511 22793 22285 21431 22566 22634 22438 21848 21703 21685 23551 23510 22712 21399 21719 22361 22912 22032 22064 21240 22642 23273 23569 21731 21645 21686 22969 22396 22000 22049 22213 23091 22639 22704 21925 22343 22544 22551 22104 22407 21764 22306 22628 23104 22481 22307 22002 22732 22215 22401 22035 22258 22469 23238 22424 22502 21696 22695 22294 22568 21902 22373 22148 22919 22455 22848 21688 22574 22139 22807 21796 22658 21760 23184 22496 22863 21842 22435 22160 22804 21940 22610 21401 22796 22444 23244 22107 22443 21899 22960 22007 23044 21757 22733 90 1191 3495 5915 6635 8423 9312 43648 43680 42465 35783 32199 29635 28754 28246 27280 27141 26354 24408 24428 24236 25125 24064 25600 24323 24712 23324 23088 22633 23603 24015 23812 24518 24152 22889 22461 22615 23636 22976 24540 23432 23489 22533 22160 22999 23139 23474 22885 23707 23013 23089 22785 22841 22728 22912 23281 23062 23221 23031 22394 22669 22844 23366 22958 22941 22309 22800 22764 23011 23056 23018 22169 22784 22377 23329 22548 23128 22322 22581 22273 22942 22858 23206 22553 22791 21967 22884 22336 23434 22632 23211 22114 22743 22339 23110 22636 23110 21896 22793 22185 23488 22473 23232 22019 22753 22488 23168 22488 23157 21820 22809 22130 23447 22400 23173 22034 22592 22331 22864 22743 23149 21984 22677 22096 23307 22129 23278 22059 22741 21959 22946 22672 23081 21949 22663 22257 23479 22390 23107 22002 22729 22459 22807 22631 22700 21918 22851 22327 23386 22368 22521 21916 22644 22864 23040 22406 22614 21588 22990 22473 23212 22017 21776 21872 22423 23542 23269 22262 21908 21578 23069 22519 23431 21986 21697 22027 22671 23340 22886 21549 21875 22080 23811 22722 22898 21480 22101 22704 22838 130 103 1150 5407 8295 10165 11497 11687 12843 43590 43686 37616 32328 29505 28039 27249 26272 25139 24813 24617 24936 24130 23831 23370 23828 23739 23669 22871 23427 23055 23783 22816 22961 22785 23388 22762 23057 22643 23712 22823 22809 22375 23106 23016 23173 22058 23097 22373 23495 22263 22797 22587 23249 22377 22771 22069 23355 22544 22957 22174 23175 23043 23383 22102 22936 22290 23591 22455 22786 22208 23118 22744 23205 21907 23079 22328 23318 22253 22592 22404 22986 22555 22807 22105 23567 22439 23088 21805 22882 22643 23172 21792 23177 22311 23179 21877 22809 22637 22900 22268 23351 22482 22395 22388 23095 22185 22559 22185 23320 22181 22746 22810 22690 22039 23189 22375 22464 22281 22869 22273 22428 22240 23641 22273 22112 23041 23185 21766 22350 22500 22897 21298 22272 23595 23093 21449 22249 22415 23242 21432 22360 23490 22143 21806 23665 22859 21894 21844 22571 22912 21801 21904 23785 22141 22009 23227 22848 21985 22331 22675 22571 22219 22321 23055 22228 22451 22950 22691 21979 22700 22529 22172 22316 22606 22451 22265 22231 23118 22126 22437 22720 22807 21835 22979 22424 22157 22263 22897 22136 22582 22173 151 1047 8281 11264 13009 13756 15611 15483 16157 16235 43664 34056 30187 27396 26984 24724 25149 24285 24224 23392 24472 23040 23585 23543 23635 22505 23869 22752 23018 23097 23480 22230 23524 22549 22816 22473 23339 22008 22982 22409 23171 22090 23062 22749 22676 22258 23145 21841 23002 22464 22725 22163 23360 21859 22887 22457 22649 22307 23513 22130 22953 22845 22692 22285 22940 22199 23099 22075 22987 22431 22541 22286 23095 21892 23059 22501 22489 22390 23041 21658 23084 22448 22371 22762 23111 21453 23010 22648 21874 22432 23052 21248 23441 22345 21674 23100 23026 21316 23093 22679 21791 22571 23131 21394 23907 22235 21981 23648 22456 21920 23892 22024 22325 23533 22459 21732 23536 22186 22904 22986 22144 22673 22816 22529 22338 23057 22187 22412 22990 22259 22316 22921 22087 22433 22649 22240 22206 22809 21872 22570 22483 22275 22314 22544 22176 22722 21920 23061 22363 22450 22587 22766 22142 23195 22073 22629 22648 22492 22129 23126 21810 22659 22320 22443 22045 22672 21900 22825 21751 22921 22215 22397 22400 22868 21785 23208 22021 22678 22592 22710 22340 23271 21751 22772 22297 22534 22056 22862 21668 22771 21952 22777 6912 12768 14944 16986 16980 18967 17896 19096 19020 41937 31744 28576 25616 25645 23664 24956 23259 23749 23460 23353 22872 23605 22443 23456 22315 23499 22675 23046 22869 22895 22432 22922 22473 23160 21946 23517 22304 22884 22829 22624 22312 22863 22308 23181 21712 23907 21681 22688 22425 22480 22761 21737 23285 22272 22046 23376 21529 23167 21387 23759 21975 22140 23086 21819 22452 22097 22624 22982 21523 23863 21772 22616 23217 21648 22663 21717 23159 23040 21953 22909 22281 22285 22666 22264 22823 21942 23027 22240 22398 22679 22204 22611 22080 22770 22633 22075 23127 21960 22683 21985 22789 22348 22391 22661 22310 22393 22277 22516 22731 22119 23127 21834 22732 21734 23061 22290 22716 22609 22328 22341 22280 22448 22827 22097 23042 21867 22853 21671 23196 22041 22598 22412 22529 22100 22368 22391 22765 21942 22915 21947 23001 21762 23192 21657 22904 21712 23204 22106 23029 22169 22660 22233 22374 22487 22506 22109 22795 22210 22803 21866 23209 21614 22998 21676 23435 21908 22767 21947 22711 22210 22678 22440 22482 22088 22403 22543 22692 21895 22813 22086 22925 22017 23119 21719 22872 21567 23233 21874 22637 22117 22743 11776 16902 18774 19416 19687 19953 20861 20603 20465 20930 28679 26214 23817 24777 22287 23792 22156 24177 21595 23197 21556 23959 21965 22516 22136 23180 22665 22337 23029 22431 22834 22043 23461 21854 22589 21754 23529 22000 22197 22443 22852 22295 22538 22215 22771 22438 22956 22625 22293 22546 22251 22913 22215 22522 22479 22737 22249 22493 22130 22805 22366 22199 22301 22455 22582 21560 22438 22591 22549 22117 22540 22416 22741 22034 22685 22183 22752 21904 22757 22356 22655 22042 22786 22214 22950 22006 23074 21933 22978 21872 23338 21800 22913 21531 23248 21780 22764 21724 23036 22041 22740 22113 22869 21991 22777 22045 22849 22217 22881 22172 22569 22152 22565 22473 22502 22388 22548 22449 22631 22214 22713 22212 22734 22196 22652 22293 22735 22073 22616 21793 23109 21994 22647 21988 22925 22098 22616 22010 22928 22054 22668 21752 23041 21889 22588 21674 23138 21820 22586 21732 23057 21793 22652 21459 23222 21596 23004 21553 23399 21504 23081 21559 23552 21345 23056 21571 23555 21617 23064 21538 22860 22183 22894 21879 23048 21828 22976 21828 23159 21926 22791 21725 23087 22263 22663 21660 22771 22055 22742 22348 22592 22455 22470 22522 22496 22550 22426 22410 22681 22264 22582 22257 22806 22393 22496 22384 22514 22553 22384 22668 22536 22436 22395 22423 22336 22366 22139 22417 21980 22829 21994 22730 21600 23093 21780 22646 21872 23028 21637 22773 21626 23127 21854 22875 21215 22744 22110 22596 21793 22552 22289 22423 21996 22309 22455 22599 22070 22603 21985 23181 21709 22938 21669 23241 21699 22939 21881 22997 21871 22905 21330 22408 22530 22394 22122 22320 22465 22352 22128 22682 22071 22801 21872 22665 21656 23145 21709 22711 21553 23077 21772 22906 21404 22736 22044 22668 21907 22311 22432 22468 22104 22267 22433 22414 22240 22377 22090 22921 21815 22732 21611 23136 21689 22872 21440 22612 22409 22318 22060 21895 23091 21756 22439 21816 22833 22389 22214 22222 22083 23460 21106 22992 21379 23664 21248 22983 21589 23222 22203 22622 21850 22357 23415 21548 22471 21728 23404 21549 22688 21888 22880 22119 22483 22505 21863 22583 22325 22187 22220 22704 22172 22313 22365 22467 22486 22343 22392 21901 22795 22016 22500 22215 22558 22295 22454 22098 22352 22491 22380 22256 22305 22498 22290 22406 22340 21952 23002 21876 22843 21996 22699 22228 22250 22131 22391 22492 22644 22119 22504 21664 23080 21621 22868 21756 22842 22078 22652 21876 22410 22408 22416 22132 22406 22379 22572 22162 22602 21813 23040 21732 119 70 90 77 4583 5915 8223 8730 10374 10247 43643 43685 37960 33132 30850 28714 28142 26259 26344 24753 25988 24313 25216 23725 24637 23808 24113 118 71 6343 9933 11561 13495 13786 15566 15096 43584 43660 39195 32592 30837 27986 27411 26807 26228 25500 24811 24500 25493 23834 24809 23786 24615 23679 117 7415 11799 14072 15491 16143 17016 17559 18115 43648 39274 31880 30967 26640 27146 24967 26480 24608 24844 24012 23761 25088 23327 24183 23664 23816 1560 9440 14487 15625 19110 17468 19765 19046 20135 20414 38437 31139 27344 27499 24854 25225 24430 24301 24743 23183 24066 23309 23763 23749 23281 23609 22792 13251 16746 19400 19697 20713 20879 20867 21143 21002 21696 29603 26314 25009 23808 24554 23515 23873 23280 23477 23652 23278 23182 23296 22720 23776 22565 23433 22855 23238 23104 22997 22802 23246 22679 23337 22449 23204 22336 23579 22507 23239 22416 22765 23043 23040 22566 23008 22163 23587 22056 23216 22148 23303 22456 22954 22316 22562 22853 22821 22589 22971 22051 23465 21991 23320 22116 23290 22327 23030 22071 22640 22700 22850 22389 22871 22209 23336 21850 23034 21881 23224 22107 23082 22169 22985 22612 22793 22309 23031 22209 23173 21891 23001 21961 23184 22425 22824 22314 22605 22645 22810 22375 22800 21889 23367 21894 23013 22219 23158 22240 22790 22183 22576 22623 22876 22187 22768 21770 23417 21835 23016 21991 23421 23050 22076 22544 22260 22969 22502 22468 22291 21719 23813 21340 23082 21846 22683 22907 22135 22369 21787 23425 21934 22592 22360 21987 23632 21403 22889 21397 23728 21819 22510 22109 21655 23552 21779 22749 22421 22609 22659 22493 22233 22311 22782 22424 22519 22998 22204 22941 22080 22733 22175 22636 22636 22343 22360 22272 22712 22312 22475 22604 22263 22824 22095 22501 21840 23160 21982 22789 22507 22752 22494 22448 22352 22843 22410 22880 21918 22813 21683 23123 21979 22852 21998 22463 22582 22446 22314 22665 21851 23351 21703 22844 21747 23092 22164 22740 22059 22521 22550 22455 22201 22676 21781 23298 21675 23040 21928 23206 22077 22841 22003 22323 22423 22497 22162 22692 22072 23046 21838 22849 21653 23355 21820 23008 21867 22701 22343 22620 22119 22629 22056 23124 21864 22769 21856 23153 21937 22813 22043 22359 22631 22375 22350 23136 22065 23025 21698 22786 21885 23052 21985 22850 21914 22373 22720 22445 22220 22485 22016 23565 21461 22871 21664 23298 22307 22503 21848 21899 23342 21611 22477 21791 22944 22369 22016 22425 21351 23843 21151 22929 22037 22557 23056 21776 22528 21858 22848 22626 21833 22372 21248 23408 22072 22528 22460 22203 23040 21868 22735 22133 22469 22685 22185 22439 22190 22583 22683 22124 22487 21812 22940 21925 22736 21952 22246 22586 22220 22401 22039 22160 23020 21805 22786 21845 22851 22132 22477 22034 22243 22571 22412 22177 22532 21962 22976 21805 22764 21591 23144 21685 22943 21735 22816 22193 22578 22061 22246 22322 22545 22175 22569 21783 23136 21701 22790 21451 23243 21687 22967 21858 22614 22274 22535 22211 22493 22281 22629 21931 22688 21637 23431 21633 22969 21767 22900 22365 22600 103 114 88 3101 5712 7909 8725 10395 10190 43604 43689 43686 35635 32824 29581 153 3906 9075 11919 13895 15053 15847 16119 17428 43588 43677 38320 34141 30080 29735 506 8343 12940 14599 17848 17362 18419 18679 18528 20468 42699 35895 30295 30024 27111 6978 12890 16756 19641 18609 20289 19930 21344 20597 20789 37760 30217 29687 26626 26187 25465 17447 20583 20557 21623 21282 22285 21808 22062 21873 31940 28163 25656 25240 24736 24280 24627 23456 24169 23417 24209 23646 23579 23139 23268 23674 23327 23178 23590 23103 23970 22602 23597 22765 23426 22849 23347 22648 22860 23094 23050 22725 23726 22501 23469 22405 23190 22208 23482 22296 23305 22384 22978 22864 23040 22481 23025 22445 23387 22346 23063 22033 23704 22005 23191 22256 23283 22620 22953 22505 22785 22612 22971 22391 23074 22065 23520 22198 22920 21995 23216 22433 22882 22333 22613 22833 22550 22479 22611 22429 23070 22246 22895 22008 23366 22380 22879 22216 21984 23355 22177 22724 22438 22155 23520 21741 22642 21376 24064 22024 23079 21433 22506 23381 21935 22541 21908 23303 22189 22667 22216 21340 23917 21465 22973 
