# Supplementary material for: An Active Feature Selection Strategy for DWT in Artificial Taste
Source: Hindawi journal article supplement (doi:10.1155/2018/9709505), 2018-01-01
Supplement: f1 [file 9709505.f1.zip › oolongTea-low-1.txt]

42008 34242 33544 32952 23 10603 15483 19083 19550 20953 20488 21319 21359 22050 21966 22316 21351 22101 21850 22872 21898 22570 21450 22443 22304 22784 21972 22432 21806 23296 22208 22702 21563 23253 22383 23146 22162 22472 22072 23305 22327 22880 21614 22931 22471 23307 21964 22567 22440 23385 22509 22916 21895 22840 22381 23218 22484 22705 21895 23368 22260 23077 21895 22930 22449 23116 22553 22753 22154 23257 22563 22917 21993 22860 22845 23296 22208 22608 22173 23480 22819 22700 21760 22631 23225 23330 22727 22087 21677 22380 22347 24064 22615 21776 21689 22431 23783 22651 21783 22848 22861 23570 21943 22455 23784 23448 21743 21837 22309 23340 23070 22040 22649 22455 23413 22432 22548 22795 22981 22809 22672 22418 23117 22636 23162 22145 22724 22532 23309 22438 22520 21931 23533 22580 22916 22181 23001 22673 23316 22188 22700 22240 23614 22538 22740 22307 23249 22603 23045 22016 23286 22372 23515 22229 22761 22364 23111 22596 22800 22246 23400 22536 23016 21881 23002 22781 23216 22055 22985 22324 23483 22222 22976 22457 23394 22144 22797 22208 23639 22386 22849 22327 23214 22530 10998 15504 18283 18394 19241 18519 19323 19749 20347 19326 29560 25879 25676 23902 23927 23765 23858 22465 22720 22726 24351 22516 22497 23180 23732 22679 21773 22801 24263 23373 22169 22535 23125 23621 22085 22072 23520 23189 23262 21599 22666 23828 23540 21880 21869 22241 23770 23086 22262 22997 22656 23312 22408 22892 22808 23224 22688 22436 22427 23397 22818 22724 22129 22892 22913 23408 22160 22717 22489 23556 22589 22752 22226 23050 22903 23061 22135 23476 22724 22988 22071 23333 22693 23354 22424 22770 22080 23479 22328 23214 21895 23077 22567 23264 22621 22759 22198 23117 22498 23494 22347 22945 22185 23278 22746 23052 21988 23116 22168 23703 22661 22868 22033 23179 22617 23404 22311 22791 22066 23568 22544 22852 21899 22986 22912 23368 22247 22600 22344 23483 22644 22670 22176 22952 22913 23273 22171 22677 22535 23473 22785 22596 21895 22565 23655 23335 21891 21824 22168 24225 22965 22105 21430 22533 23910 23511 21917 21541 22184 23593 23133 23424 21954 22176 23488 23457 22878 21965 22068 23221 23004 22903 22780 22230 22939 22409 23406 22707 22560 22256 22785 23097 23317 22385 22569 22318 23280 22474 23438 22501 22651 22016 17287 18968 20352 20169 20957 20049 21000 20537 21789 31108 26784 24278 24064 23096 23700 23250 23832 22801 23278 22107 23225 22318 23765 22726 23500 22562 22917 22052 23120 22663 23446 22574 23296 22025 22944 22726 23416 22301 23631 22564 23082 22278 23056 22210 23174 22487 23052 22553 23093 21935 22853 22505 23339 22326 23525 22678 23298 22362 22788 22024 23317 22717 22977 22936 23365 22684 23087 22186 22708 22183 22828 22556 23477 22500 24092 22924 22848 22094 22044 21316 22380 21932 22287 23296 22700 23993 23558 23291 22833 21639 21636 22234 22496 22249 23776 22776 24192 23246 23109 22475 22139 22303 22536 22885 22376 23438 22585 23472 22794 22841 22487 22672 22288 22596 22404 22776 22940 23057 22971 23413 22694 23034 22188 22604 22143 22825 22250 23307 22411 23586 22695 23233 22504 22800 22092 22793 21927 22985 22201 23048 22455 23175 22708 23310 22726 23424 22754 23216 22286 22942 21956 22768 22192 22914 22049 23154 22128 23445 22122 23517 22512 23559 22652 23424 22504 23048 22367 23009 22080 22917 21966 22799 21867 22997 22125 23016 22203 23092 22521 23013 22728 22947 22696 22884 22840 23264 22960 23252 22920 23124 22635 16716 19541 21065 20929 21907 21391 21951 21396 22155 21527 26836 24164 24186 23392 23156 22540 22830 22387 23110 22538 22984 22606 23088 22787 23237 23227 23483 23342 23552 23680 23497 23796 23527 23941 23499 23988 23429 24188 22705 23308 22567 23545 22480 23309 22429 23215 22519 22984 22688 22853 22607 22716 22450 22631 22264 22608 22338 22629 22212 22704 22245 22566 22234 22687 22105 22736 22056 22840 22016 22875 22037 22837 21948 22729 21984 22788 21967 22948 22144 23168 22256 23317 22486 23483 22690 23400 22787 23290 22862 23349 22704 23160 22661 23115 22452 22937 22146 23161 22109 23064 21877 22981 21990 22759 22122 23160 22651 23560 22387 23540 22290 23492 22164 23111 22208 23005 22199 22769 21959 23136 22469 23329 22761 23200 22871 22984 22400 22553 22127 22651 22133 23008 22667 23370 22626 23351 22235 23060 22203 22629 21590 22878 22676 23287 23540 23381 23725 22640 22621 22332 21344 21884 22279 23347 23145 24238 22660 23020 22304 21709 21655 22103 22744 23544 23982 22704 22600 22304 21421 22068 23055 24037 23127 22887 22812 22225 22585 22580 23170 22828 23308 22419 22576 22169 22893 22568 23139 22903 22836 22614 22832 22151 20466 21323 22359 21495 22215 21693 22069 21601 22806 26891 24361 22912 23169 22507 23479 22697 23540 22293 23080 22129 23181 22535 23409 22608 23447 21981 22834 22597 23611 22160 23120 22088 22881 22329 23447 22727 22978 21948 22954 22380 23696 22478 23388 22072 22691 22176 23424 22883 23023 21927 22842 22385 23745 22192 23192 22208 22752 22261 23271 22705 23153 22082 23005 22611 23454 21699 22663 22484 23212 22807 22888 22043 22936 22715 23398 22252 22669 22680 22969 22362 22016 22855 24097 22592 21793 21538 23495 23717 22229 21433 22992 22887 22472 21710 23312 23870 22311 21525 22002 23208 23513 22051 21946 23732 22493 21655 22176 23468 23024 22921 22326 23297 22313 22810 22162 23079 23155 22807 22103 22885 22712 22970 22205 23072 23033 22901 21977 23046 22455 22967 22108 23223 22860 23002 22119 23380 22313 22909 22024 23268 22785 22330 22027 23035 22557 23336 22023 23278 22692 23424 21993 23575 22173 22727 22245 23428 22692 23046 22247 23504 22128 22853 22485 23303 22128 22872 22528 23654 22747 22926 22689 23044 21948 22816 22513 23350 22045 23273 22616 22857 21947 23407 22282 22870 22039 23333 22528 22944 22386 23452 22312 20823 21508 22651 22167 22336 22277 23168 21978 22563 22674 23765 22353 23328 22688 23205 21913 23093 23717 22610 21997 24135 22157 21676 22663 22969 21968 21880 23197 23682 21840 22839 23923 22439 21208 23168 22714 21995 21716 23543 23200 21925 22721 24132 22174 21530 22441 22691 22806 22159 23264 22832 22909 22404 23392 22427 22624 22232 23144 22854 22643 22551 23433 22292 22630 22636 23114 22282 22645 22727 23344 22214 22829 22622 23046 22144 22766 22566 23383 22151 23085 22794 23140 22073 23504 22229 22976 22037 23370 22204 22926 22492 23561 22069 23104 22824 23456 22054 23304 22334 22848 22085 23441 22513 22776 22369 23557 22074 23080 22709 22953 21975 23236 22391 22836 22135 23277 21988 23006 22443 23205 21853 23427 22636 22948 22468 23530 22432 23016 22866 23358 22181 23542 22322 22776 22912 22921 22000 23393 22308 22605 22480 22923 22177 22900 22643 22807 21825 23339 22740 21928 22909 24123 21931 22699 23831 22660 21643 23886 22040 21738 23628 22377 21777 24151 22113 22196 23919 22378 21453 23812 22189 21642 23626 22305 21874 24238 22108 22409 23376 22346 22615 22967 22871 22272 23348 22494 22688 22964 22820 22599 23409 22217 23043 22919 22705 22617 23159 22092 23380 22470 22534 22658 22844 22407 23002 22071 23501 22660 23080 22811 22787 22582 22858 22281 23073 22098 23431 22181 22863 22789 22988 22453 23408 21815 23304 22041 23283 22093 22773 22805 22459 22291 23457 22012 23232 22509 22833 22329 22889 22364 23031 21932 23638 22064 23272 22359 22740 22492 22656 22592 23074 21795 23749 22184 23257 22596 22874 22232 22710 22493 22916 22279 23488 22072 23229 22402 22880 22311 22734 22749 22710 22729 22739 22686 22516 22433 23276 22024 23005 22074 23462 22402 23154 22443 22652 22436 22484 23522 21934 22611 21645 23817 22278 23229 22232 22509 22439 21448 24208 21621 23383 21458 23450 22480 22449 23632 21753 23018 21556 23536 22476 22707 22835 21681 23084 21327 24167 22343 22948 22699 22813 22753 22507 23301 22208 22876 22273 23348 22177 23041 22306 23284 22325 23111 22532 22896 22344 22675 22902 22629 22426 22661 22881 22950 22815 22733 22501 22876 22238 23495 22127 23224 22037 23392 22297 23114 22368 22906 22224 22788 22759 22724 22382 22720 22507 23296 22344 23393 22020 23155 21824 23681 21922 23354 21991 23200 22112 22907 22731 22860 22468 23009 22509 22909 22157 23448 21899 23210 21684 23543 22181 23355 22512 22750 22348 22809 22717 22884 22749 22929 22477 23069 22379 23276 22025 23111 22247 23451 21883 23474 13511 18247 17796 19493 18782 19836 19036 20029 19793 36944 27740 25408 24544 23911 23429 23610 22691 23372 22484 23859 22507 23509 22471 23345 22327 23008 22804 16960 19068 20064 21019 20728 21009 20877 21527 21175 31811 26725 23689 24106 22050 24686 22333 23820 22608 22294 22630 21852 24056 22196 23395 22151 23105 11790 18716 21552 20164 21900 20292 23201 20885 22496 21852 27634 24401 22794 24674 22436 23562 22056 23441 22576 22861 23407 22055 22772 22584 23056 22881 22888 17961 20442 21718 21450 22515 21552 22547 21703 22759 22356 25371 24100 23042 23127 22752 22978 23415 22770 23277 22285 23240 22272 23494 22352 22799 22973 22869 20800 21999 22125 22515 22089 23185 21746 22985 21736 23328 23355 23573 22922 22823 22720 22802 22648 23134 22285 23508 22009 23385 22173 23353 22234 23077 22749 22925 22400 22961 22625 23581 22364 23462 22066 23184 21904 23703 22304 23329 22192 22933 22456 22793 22753 22916 22535 23168 22304 23072 21935 23714 21976 23488 22508 22948 22386 22949 22569 23096 22219 23517 21875 23411 21953 23444 22251 22887 22789 22701 22491 23456 21959 23157 21899 23532 21693 23265 22742 22724 22452 22876 22403 23093 21929 23557 21904 22903 22839 22761 22657 23408 21924 23332 22288 22882 22377 22633 22666 22920 22135 23392 22561 23036 22884 22597 22624 22841 22432 23095 21990 23502 22376 22797 22794 22807 22516 23408 22154 23209 22493 22730 22554 22583 22320 22937 21852 23751 22272 22309 23581 22470 22314 24066 21909 23064 23213 21949 23175 22830 21594 23427 21641 22746 22378 21680 22378 22647 21308 23643 22300 21738 23629 22371 21900 24204 22191 22576 23972 22528 22256 24120 22001 22658 23863 22154 22834 23898 21952 23100 23789 22065 22958 23847 21956 22716 23984 22221 22692 24080 22040 22967 23849 21991 22999 23466 22039 22852 23156 22090 23160 22848 22836 22575 23336 22188 22920 23013 22734 22650 23345 22373 23056 22953 22697 22749 23159 22389 22712 23072 22104 22340 23258 23006 22696 22996 22731 22496 23356 22410 22919 22860 22852 22500 23426 22532 22841 22947 23392 22184 23483 22729 22633 22881 22839 22081 23397 22312 22599 22781 22880 21998 23302 22135 22584 22327 23191 22168 22710 22556 23179 21910 23250 22644 22860 22327 23659 22342 22848 22888 22544 22164 23587 22287 22986 22799 23127 22075 23619 22284 23040 22814 23153 22320 23495 22064 23293 22612 22969 22154 23719 22154 23107 22656 23032 22500 23387 21991 23319 22533 22711 22265 23572 22187 23274 22678 22680 22401 23320 21794 23316 22407 22823 22417 23431 21816 23452 22300 22661 22466 23445 21814 23384 22432 22716 22471 23444 21912 23344 22657 23068 22337 23504 22176 22977 22864 23407 22099 23584 22388 22817 22656 22923 21997 23641 22173 22960 22716 23061 21879 23631 22266 22682 22356 23136 21866 23321 22262 22856 22265 23264 22048 23108 22466 23221 21863 23242 22498 22545 22533 23296 22009 23051 22665 22701 22444 23418 22375 22996 22725 22878 22058 23297 22260 22609 22797 22828 22009 23156 22241 22610 22503 22990 22062 22896 22539 22727 21973 23280 22384 22552 22776 23195 21983 23129 22840 22673 22624 8976 15677 18033 19060 19360 18664 20366 19616 19049 19889 31029 25336 24309 24164 23591 22135 18076 19799 19817 20737 22562 20517 21132 22648 21085 31488 27673 23600 23069 24500 23035 15981 20662 20903 20666 20554 22538 22201 20925 22215 23160 24972 24167 24807 23377 21960 18605 21212 21703 20750 22647 23427 22100 21504 23657 21840 24481 23841 23584 23296 22288 22900 23146 21747 21256 22941 22417 21476 21764 23063 23173 23835 22344 23855 22711 22652 22952 23081 22646 22540 22953 23312 22216 23388 23050 22906 22135 23460 22438 22632 22624 23094 22664 22496 22823 23053 22383 22806 23212 22717 22259 23096 22509 22590 22519 23069 22541 22480 22770 23402 22104 22694 22896 22843 22124 23254 22381 22673 22370 23193 22331 22565 22764 23496 22215 22875 23008 22809 22009 23280 22469 22709 22353 23112 22401 22643 22616 23453 22152 22912 22813 23022 22123 22735 22556 23286 22299 23005 22746 23017 22043 22959 22389 23036 21975 23068 22825 23074 21991 23196 22366 22844 22019 23417 22606 22889 22132 23448 22180 22902 22097 23314 22241 22758 22410 23521 22029 22978 22648 23031 21847 22952 22279 23067 21964 
21273 22217 22980 21385 22733 21628 23141 21979 23142 22035 23120 22163 23171 22128 22875 22337 22945 22267 22429 22061 22303 21894 22272 22082 22059 21747 21710 21533 21745 21377 21446 21432 21823 21840 21843 21949 22040 20720 21965 21762 20480 19936 20461 22432 21701 20216 20105 20669 22350 21600 20905 20528 21249 21150 21625 21061 21172 20981 21560 21232 21512 20808 21232 21224 21436 21063 21200 20786 21704 21239 21202 20656 20689 21382 21678 20711 21216 20772 22005 21150 21454 20565 21606 21307 21636 21325 21258 20654 21552 20808 22166 21024 21232 20720 21372 21539 21489 20692 21494 20912 21905 20800 21367 21301 21796 20902 21233 20920 21959 21337 21111 20736 21434 21457 21744 20618 21813 21168 21916 20788 21307 21240 21623 21341 21240 21012 21716 21275 21386 20736 21186 21408 21716 21052 21015 20621 21982 21425 21350 20731 21504 22194 21813 20247 21184 21357 22481 20631 20647 21623 21633 22133 20825 20522 21637 21488 22003 20281 20882 22145 22087 20634 20436 20926 22848 21649 20398 20646 21120 22034 21121 21336 21172 21888 21156 21181 21099 21972 21360 21158 21376 21748 21252 21297 13617 15455 15483 16203 15409 16662 16919 17259 16526 16920 24679 24896 23216 23008 22681 23025 21849 22039 21737 22861 21730 21797 21672 22243 21560 21741 21253 22572 21593 21750 21047 21904 21821 21826 21085 22247 21408 22145 21129 21809 21566 22313 21060 21576 21290 22412 21424 21379 21156 21792 21664 21741 20968 22032 21354 21989 20749 21655 21736 22050 21028 21266 21109 22144 21511 21485 21091 21594 21840 21798 20864 21504 21267 22155 21163 21383 21527 21862 20972 21013 21213 22695 21831 21598 20400 20921 22198 22225 21507 20297 21112 22484 22064 21648 20306 20967 21814 21755 22055 20856 20661 21344 21520 22316 20888 20519 21281 21455 22317 21499 21285 20932 21634 21722 21792 21181 21309 21278 22069 21670 21337 20984 21584 21735 21981 21097 21377 21647 22097 21521 21623 20983 21523 21729 21898 21001 21354 20803 22148 21585 21623 20896 21610 21561 22104 21068 21413 20997 22246 21272 21509 20776 21613 21612 21913 21112 21411 21362 22081 21305 22002 20907 21650 21240 21905 21189 21430 20914 21969 21400 22084 21120 21605 21395 21935 21615 21909 20852 21588 20983 22162 21287 21487 20941 21672 21605 21741 21675 21723 20969 21319 15376 17993 18063 18583 18292 18695 18584 19184 19437 19671 24507 23511 22436 22711 22233 23505 22578 21904 20992 21158 21408 21527 22871 22475 21496 20892 20608 20956 21060 22942 21942 21664 20567 20664 20698 21117 22791 22096 22304 21602 20539 20921 21572 21336 21677 21768 21861 21808 21437 20981 21480 21328 21946 21408 22203 21513 21462 21045 21336 20981 22091 21761 21760 21607 21885 21149 21486 20837 21394 21074 21815 21091 22196 21313 22252 21507 21986 20830 21511 20784 21664 21309 21863 21534 21877 21677 22028 21337 21685 20935 21623 21044 22088 21063 22332 21269 22288 21423 21765 20916 21422 20761 22115 21681 21824 21620 22016 21451 21938 21010 21577 20967 21523 21117 21739 21230 22240 21456 22251 21543 21707 21021 21362 21028 21562 21425 21482 21795 21964 21864 21861 21314 21525 20837 21269 21248 21373 20529 22200 21255 22792 21777 22861 22144 22425 21847 21515 21011 20615 20277 20895 20832 21637 21814 21179 22432 21673 22792 22043 22836 22126 21526 21298 20888 20654 21056 20887 21435 20919 21515 21019 21704 21245 21565 21722 21517 21656 21593 21655 21673 21815 21838 21769 21978 21792 22001 21845 21902 21417 21736 21104 21534 18089 19506 19140 20013 19536 20312 19570 20377 19687 20283 22440 22560 21594 22216 21236 21895 21090 21672 20949 21624 20893 21590 21024 21571 21146 21823 21081 21751 21054 21875 21396 22007 21421 21994 21517 22066 21638 22135 21727 22040 21790 21994 21681 22065 21592 21968 21677 21874 21698 21751 21516 21674 21496 21616 21298 21997 21406 21438 21248 21587 21484 21654 21287 21347 21008 21664 21123 21637 21017 21534 21078 21621 21239 21556 20955 21111 20651 20953 20413 20609 20352 20642 20565 21090 21169 21651 21859 22216 22108 22267 21975 22914 21919 22864 21714 22862 21370 22474 21113 22057 21184 21542 21097 20555 20688 20919 21487 21359 22054 21613 22251 21545 22165 21323 22028 21312 21657 21233 21288 20935 21445 21208 21872 21744 21925 21725 21713 21575 21607 21002 21318 20903 21504 21388 22084 21446 22280 21192 21955 21259 21384 21037 21575 21056 21931 21568 21999 21697 21780 21410 21857 20773 21416 21128 21940 21485 22278 21248 22060 21341 21646 20965 21820 21400 22175 21728 21671 21205 21610 20907 21698 21510 22212 21633 22294 21122 21555 20780 21780 21469 22048 21623 21949 20918 21425 21040 21815 21636 22275 21393 21893 18479 19832 20101 20869 20887 20743 20804 20704 20232 20968 22727 22892 21841 21876 21036 21661 21861 22191 22713 21395 20932 20816 20749 22089 22056 22494 21304 20449 20736 22084 23132 21334 21792 21032 20389 21440 22174 22852 21089 20752 20553 21251 22252 22336 22599 21264 21275 21102 22027 21824 21730 21025 21358 21574 22091 21352 21797 21319 21473 21583 21837 21529 21434 21019 21832 21498 22080 21047 21370 21471 21807 21447 21650 20955 22091 21413 21996 20854 21729 21703 21660 20870 21698 21436 22101 21229 21408 21268 22051 21385 21635 21179 22253 21149 21380 21137 21973 21633 22221 20870 22229 21239 21882 20868 22067 21885 21172 20910 21884 21395 21843 20924 22016 21704 21765 20824 21520 21453 22184 20898 21640 21750 21755 21048 21555 21536 22063 21273 21465 21780 21625 20995 21491 21447 21895 21175 21702 21902 21553 20928 21613 21599 22148 21221 21062 21801 21749 21004 20757 22138 22307 20614 21655 22874 21141 20182 21510 21922 21745 20544 21941 22729 21028 20704 22694 21157 20446 21399 22277 22233 20771 21429 22834 21701 20858 22008 21367 21628 21152 21909 21623 21597 21480 22096 21809 21283 21468 21639 21275 21444 21481 22217 20386 20824 21005 21102 20659 21173 21072 21587 20662 23092 22116 22071 21208 22362 21333 21653 21095 22128 21368 21476 21488 22363 21088 21704 21705 21801 20837 21958 21358 21621 20912 22128 21671 21597 21263 22343 20993 21563 21559 21769 20868 21709 21510 22215 21176 21633 21787 21640 20940 21813 21281 21986 20861 22072 21548 21775 20895 21998 21408 21659 20941 22017 21627 21516 21219 22150 21263 21354 21531 21987 21399 21295 21269 22322 21360 21293 21309 21973 21472 21236 21730 22419 20697 21842 22530 21412 20373 22503 21327 20775 20961 22195 21319 20800 22187 22519 20692 20853 22666 21159 20362 21953 21697 20933 20984 22219 21828 20672 22169 22917 21162 21303 22277 21184 21488 21837 21782 21207 22104 21399 21383 21531 21808 21379 21485 21680 21929 21061 22178 21659 21563 21592 22215 21173 21921 21852 21696 21451 22357 21281 21772 21863 21770 21161 22441 21320 21548 21638 21970 21046 21976 21458 22013 21000 22176 21590 21602 21527 22157 21037 22166 21703 21605 21652 22304 21112 22208 21703 21831 21579 22476 21117 22329 21632 21616 21562 22245 21053 22223 21530 21672 21559 22369 21079 22277 21783 21732 21692 22154 21175 22056 21259 21750 21752 21831 21470 21913 21189 22080 21404 21549 21891 21774 21357 22353 21399 22160 21604 21549 21629 21644 21638 21846 20944 22704 21276 21603 22746 20998 22245 21134 21127 21656 20351 22899 21184 21153 23002 21168 22095 22528 20792 22357 21283 21216 21715 20672 22913 21391 20900 23196 20858 22409 21617 21382 21887 21097 22368 21557 21927 21947 21675 21770 21952 21298 21843 21269 22279 21540 21857 21918 21489 21751 21737 21600 21872 21262 22356 21176 22070 21223 22291 21487 21982 21709 21655 21406 21610 21892 21585 21601 22133 21376 21979 21265 22439 21113 22159 21024 22586 21152 22260 21257 22306 21272 22049 21813 21659 21604 21653 21997 21534 21623 22435 21024 22104 20952 22548 21353 22273 21450 21943 21392 21673 21875 21888 21691 21870 21700 21712 21518 22283 21111 22029 20983 22477 20967 22226 21046 22408 21520 22239 21500 22040 21490 21914 21889 21509 21712 21589 22077 21694 21817 21715 21765 21616 21485 22381 21094 22113 21148 22365 21540 22056 21544 21895 21481 21732 22227 21130 21959 20967 22696 21248 21504 22400 21027 21685 20574 23212 20747 22490 20868 22400 21385 21294 22939 20825 22254 21032 22055 21354 21356 22510 20791 21980 20521 23163 21099 22407 21611 21517 21705 20615 22998 21132 22134 21588 22160 21280 21893 21927 21879 21523 21800 22017 21630 21885 21595 22043 14766 16601 17483 17651 17958 17942 18863 17812 18808 26049 25664 23714 23872 22537 22903 22071 22097 22321 21845 21811 21991 21782 21918 21290 22464 21192 15175 16899 19117 18373 19739 18913 20083 18839 20295 19631 25384 23493 23078 22791 22590 22136 22231 21996 22197 21202 22599 21184 22199 21166 22404 21825 21920 18090 19278 19456 19910 20391 20453 20281 20544 20145 20722 23154 23737 21783 22590 21283 22519 21272 22148 21599 21769 21513 21572 21934 21685 21670 21933 21260 19866 19778 21283 19764 21132 20136 21568 20791 21369 20724 22503 22055 21911 21946 21829 21648 22032 21240 21843 21071 22171 21547 21616 21937 21437 21682 21475 20715 20967 20837 21637 20585 21470 20491 21813 20738 23123 21836 22058 21559 21646 21930 20988 21252 22183 20629 22023 20844 22149 21354 21429 22539 20601 21997 20790 22309 21291 21410 22255 20727 21732 20315 23057 20934 22190 21249 21590 21031 20404 22826 21424 22141 21996 21237 21399 20715 23162 20845 22385 21239 21293 21881 20515 22475 21122 21415 22634 20561 22045 20553 22559 21116 21493 22512 20998 22035 21136 21921 21304 21464 21910 21583 21683 21974 21187 21870 21089 22091 21440 21608 21965 21581 21656 22005 21127 21965 21351 21644 21511 21473 21868 21613 21180 22231 21225 21873 21901 21602 21625 22020 21235 21901 21145 22058 21284 21742 21813 21687 21524 22146 21040 22096 21217 21545 21495 21760 21530 21780 21015 22337 21532 21657 21839 21632 21566 22293 21065 22272 21401 21561 21543 21913 21312 21995 21017 22344 21248 21561 21825 21979 21205 22616 21494 21866 21834 21818 21451 22272 21116 22173 21648 21636 21635 22016 21187 22223 21437 21585 21591 21944 20951 22102 21004 21755 21449 21710 21121 22081 21042 21907 21474 21786 21049 22090 21166 21848 21465 21888 21217 22042 21120 21965 21406 21611 21547 21792 21092 21932 21349 21765 21208 22124 21288 21851 21504 21968 20984 22165 21277 21704 21479 21866 21226 22141 21301 21589 21568 22080 20916 22261 21635 21504 21616 21942 21040 22087 21520 21527 21677 21892 21289 22044 21637 21429 21681 21948 21120 22037 21772 21431 21687 22237 21239 21845 21880 21651 21627 22401 21316 21813 21911 21760 21179 22388 21458 21432 21651 21900 21020 22186 21551 21888 20875 22119 21897 21368 21861 22143 20713 22395 21728 20827 22121 22400 20538 22304 21861 20841 22240 21877 20689 22216 21255 20898 22087 22127 20518 22460 21718 20730 22129 21622 21065 22187 20942 21328 21991 20822 20582 22303 21440 21161 22000 21132 21312 22052 20689 21957 21499 20546 21292 22033 20655 21795 21777 20839 21460 21852 20522 21556 21537 20578 21675 22263 21305 21021 22036 21603 20760 22439 21891 20750 22051 21926 21403 21735 22103 21064 22107 21928 21545 21784 22322 21209 22102 21965 21635 21760 22350 21640 21737 22062 22132 21381 22383 21261 21607 22135 21701 21364 22298 21498 21432 21924 21820 21185 21856 21538 21649 21193 22053 21352 21646 21767 21901 20999 22173 21944 21831 21445 22360 21213 21874 22078 21701 21456 22339 21321 21960 22120 22407 21236 22395 21318 21609 21675 21861 20953 22084 21387 21633 21559 21956 21094 21771 14435 16632 16441 18002 18137 18205 18126 19322 18433 19089 25910 24381 23002 23809 22338 22352 17891 18981 18705 19597 19644 20249 19305 20512 19648 25572 23883 23856 22025 23015 22404 19312 19337 20736 19849 20282 20629 20739 19997 20788 25002 23782 22224 23002 22164 22062 19459 21183 20267 20665 20320 21327 20614 20741 20722 21602 22393 22760 22341 22238 21296 20241 20731 21572 20613 21538 21393 21793 20416 21760 21057 22549 21422 22261 21924 21840 21440 22439 21335 21433 21541 22075 21148 21969 21491 22221 20955 22066 21664 21735 21040 22238 21159 21601 21404 21904 21133 21481 21532 22316 21184 21872 21800 21893 21094 22187 21197 21334 21357 22023 21624 21491 21548 22105 21196 21767 21948 22121 21157 22194 21268 21430 21278 21982 21463 21452 21664 22113 21128 21883 21856 21729 21211 22224 21427 21406 21253 21990 21589 21475 21523 22353 21301 21472 21536 21890 21480 21477 21670 22253 21462 21393 21868 21724 21198 21197 21767 22620 21492 21228 22409 21495 20576 21508 21900 21962 20552 21712 22861 21431 20335 22364 21317 20641 20913 22275 21760 20744 22112 22980 21530 20711 22401 21469 20672 
21365 22183 21611 22265 21607 22322 21772 22359 21745 22343 21783 22312 21681 22208 21766 22208 21645 22049 21637 22016 21521 21904 21605 21980 21545 21829 21348 21680 21523 21734 21376 21720 21568 21912 21414 21861 21593 21948 21719 22035 21640 22071 21763 22124 21686 22021 21593 22144 21743 22168 21670 22368 21585 22336 21792 22423 21747 22401 21784 22392 21705 22344 21609 22373 21511 22140 21417 22081 21300 22004 21385 22004 21429 21891 21351 21204 21127 21743 22151 21490 21544 21388 22138 21826 22502 21344 21312 21088 21479 22836 22360 20878 20732 21078 22988 22204 21080 20818 21593 22676 21674 21025 21577 22350 21895 20512 21569 22659 22530 21560 21309 21664 22080 22117 21376 21720 21703 22096 21800 21636 21624 21902 22051 21722 21526 21779 21575 22129 21319 21977 21789 22012 21635 21600 21383 22030 21869 21863 21273 21518 21804 22123 21491 21538 21357 22346 21717 21740 21335 21912 21896 22063 21257 21688 21453 22297 21515 21789 21628 21937 21911 21584 21894 22229 21727 21826 21155 21790 21970 22043 21258 21671 21437 22272 21146 22245 21834 22148 21255 21733 21499 22305 21458 21793 14629 17419 18001 18679 18720 19654 19573 19985 19399 32112 25869 24371 22599 22580 22209 22365 21401 22064 22568 22614 20917 21411 21705 22916 21007 21557 22130 22664 21434 20809 21097 23074 21736 21111 21303 22193 22469 21544 21088 22072 22184 21901 20544 21273 22796 22598 21256 21373 21620 22064 21961 21401 21706 21724 22076 21549 21561 22040 22016 21792 21474 21152 22103 21904 21588 21263 21738 22020 22168 21369 21586 21472 22283 21794 21667 21396 21808 21802 21625 21591 22070 21815 22071 21384 21797 21555 22069 21763 21940 21445 22073 21639 22294 21539 21735 21466 21913 21972 22064 21209 21778 21400 22369 21645 21705 21208 21893 21936 22157 21389 21690 21773 22275 21741 21929 21289 22052 21628 22233 21402 21611 21271 22130 21667 22005 21251 21553 21799 22195 21664 21536 21416 22324 21746 21928 21268 21966 21745 22161 21401 21487 21708 22458 22082 21509 20670 21175 22814 22560 20996 20730 21144 22919 22401 21545 20503 21393 22245 22328 22427 21416 21104 21570 21679 22325 20981 21283 21382 21911 22511 21696 21497 21552 21744 22064 22103 21394 21461 21592 22007 21957 21661 21365 21802 21891 21926 22029 21896 21320 21530 21578 13675 18112 19685 19764 20142 20071 20519 20871 21132 20762 26461 23604 22992 22182 22728 22080 22321 21534 21885 21401 21895 21899 22250 21660 21797 21196 21656 21484 22201 21705 22203 21421 21769 21239 21815 21736 22160 21952 22172 21211 21552 21466 21847 21397 22291 21675 22390 21691 21793 21293 21911 21824 22128 21858 22136 21424 21673 21269 21685 21649 22100 21655 22280 21874 21789 21216 21779 21225 21617 21507 21839 22062 22112 22019 22286 21320 21617 21139 21110 21116 22159 21560 23043 22336 22880 22168 21614 21026 21256 20812 21412 22354 22027 22967 22677 22464 22232 21217 20989 21033 20758 21261 21930 21794 22061 22093 21923 21840 21468 21511 21594 21479 21408 21656 21575 22108 21904 22176 21811 21658 21371 21685 21376 21699 21640 21826 21997 22118 21914 22059 21653 21592 21440 21663 21686 21834 21431 22058 21511 22265 21760 22359 21787 22117 21727 21864 21464 21621 21252 21804 21376 21814 21671 21819 21767 22043 21930 22099 21917 22244 21437 21807 21317 21776 21333 21552 21366 21695 21504 21755 21364 21967 21368 22293 21466 22215 21413 22272 21632 22352 21785 22305 21737 22248 21775 22254 21703 21906 21588 21665 21314 21671 17429 19815 19944 20784 20392 20833 20504 20951 20356 27371 23165 22483 21320 21505 20646 21469 20657 21438 20556 21199 20568 21352 20585 21255 20576 21220 20568 21115 20885 21195 21167 21316 21121 21329 21318 21460 21774 21864 22068 21966 22112 22036 22040 22036 22092 22176 21990 22177 21885 22135 21813 22027 21808 22040 21699 21752 21656 21594 21698 21814 21766 21771 21619 21613 21760 21610 21610 21412 21779 21563 21841 21427 21692 21518 21156 21437 21501 21316 21943 21190 21805 21181 21608 21265 21715 21511 21859 21719 22024 21736 22171 21831 22320 21632 22437 21618 22329 21517 22300 21416 21977 21441 21920 21201 21649 21315 21608 21367 21971 21600 22289 21918 22176 21876 22082 21880 21876 21429 22074 21225 21691 21272 21761 21731 22289 21760 22365 21517 22074 21406 21605 21355 21609 21391 22064 21862 22144 21900 21769 21620 21783 20999 21287 20944 21410 21771 22629 22521 23032 21464 21852 21273 20784 20874 21638 21654 22649 22896 21787 22239 21322 20656 21102 21325 21902 22388 23013 21369 21620 21228 21060 21401 21873 22247 21716 21973 21600 21440 21458 21911 22115 21869 21812 21777 21443 21543 21607 22024 21971 22210 21485 17793 20050 20762 21265 21684 21648 21496 21228 21415 21126 24230 22853 22717 21673 21706 21391 22098 22020 22055 21841 21800 21232 21642 21679 22439 21506 21978 21376 21702 21678 22216 21923 21796 21339 21625 21542 22392 21656 22157 21851 21648 21318 22222 21984 21970 21472 21750 21332 22199 21644 22149 21563 21703 21514 22208 21864 21878 21393 21672 21693 22438 21406 21667 21323 21916 21879 21825 21304 21727 21730 22395 21425 21785 21346 22028 22022 21787 21170 21568 21990 22443 21339 21415 22477 22066 21967 21352 21427 23059 21604 21032 20873 22636 22566 21555 21082 22818 22080 21993 21133 22016 22888 21287 20534 21678 22349 21949 21160 21689 22279 21612 21410 21588 21949 21893 21514 21451 21916 21800 21687 21490 22016 22006 20976 21384 22023 21637 21700 21468 22166 21984 21459 21379 22224 21475 21651 21399 22202 21751 21695 21380 22258 21556 21850 21255 22072 21847 21789 21259 22315 21384 21653 21464 22101 21498 21795 21574 22326 21347 21643 21688 21941 21355 21703 21731 22304 21408 22003 21847 21948 21231 21788 21697 21936 21376 22168 21917 21803 21173 22304 21489 21810 21272 22208 21640 21840 21705 22342 21351 21578 21777 22009 20256 21129 21440 22071 21033 21607 21805 21681 21110 23893 22407 22135 21292 22165 22191 22122 21217 22729 21425 20923 21955 22151 21068 21188 22515 22488 21056 21970 22892 21230 20508 22247 21735 21025 20930 22688 22080 21257 21964 23028 21478 20930 21921 22431 21304 21372 22022 22023 21816 21605 22219 21527 21450 21865 21967 21945 21658 21719 22135 21565 21493 21891 21712 21381 21540 21820 22135 21430 21733 22037 21840 21312 21511 21799 22103 21536 21835 21975 21696 21351 22193 21473 21568 21609 22168 21716 21782 21821 22323 21385 21927 21953 21809 21210 22204 21454 21623 21232 22225 21735 21740 21699 22340 21543 21863 21888 21882 21193 22246 21657 21755 21319 22183 21521 21767 21733 22007 21303 22221 21749 21979 21489 22353 21408 21809 21916 21863 21193 22203 21412 21635 21681 21821 21178 21914 21480 21623 21500 22110 21480 21550 21748 22100 21168 22215 21892 21560 21807 22973 21405 21427 22597 21401 20550 22764 21448 20811 21692 21879 20624 21885 21542 20686 21959 21672 20633 22705 21844 20839 21373 22053 20832 21952 21625 20757 22490 21384 21352 22057 21625 21327 21952 21631 21461 21835 21670 21367 22087 21571 21602 22184 21096 21427 22158 21539 21840 22091 21740 21735 22108 21413 22088 21705 21587 21784 21660 21744 21760 21381 22292 21347 22056 21550 21677 21824 21813 21400 21998 21221 22241 21448 21920 21798 21785 21799 22001 21301 21988 21217 22124 21504 21547 21993 21853 21405 22386 21275 22240 21512 21731 21585 21548 21926 21747 21632 22180 21328 22248 21363 21978 21484 21728 21761 21842 21357 22288 21299 22232 21383 21881 21409 21632 22023 21750 21662 22200 21315 22030 21280 22337 21330 22179 21548 21863 21358 21754 21978 21703 21767 21597 21600 21809 21481 22252 20920 21959 20773 23078 21034 22643 20567 22788 21536 22215 21828 21465 21981 20774 22892 21485 22397 21797 21319 21607 20716 23028 21186 22672 21098 22016 21233 21504 22550 21380 22576 21039 22176 21176 21952 21717 21594 21549 21618 21952 21648 21761 21440 22088 21741 22041 21648 21813 21600 21753 21974 21434 21772 21337 22215 21405 22052 21300 22269 21284 22064 21618 21564 21670 21597 22112 21780 21878 21735 21800 21638 21549 22040 21324 21879 21285 22254 21383 22252 21446 21859 21331 21872 21792 21645 21602 21589 21910 21833 21808 21820 21284 21920 21272 22366 21664 22164 21527 21821 21446 21792 21895 21877 21649 21741 21757 21827 21568 22272 21241 22241 21217 22219 21162 22119 21552 21817 21468 21881 21687 21749 21521 21639 21843 21804 21731 17040 18624 19524 19497 20429 19725 20401 19786 21074 28467 25338 22983 23136 21991 22362 22011 21687 21701 21651 22031 22177 21661 21956 21335 21825 21283 13712 17678 20148 19793 21152 20455 21285 20777 21026 20672 26534 24760 22462 22954 21411 22701 21690 22449 22768 20925 22377 20488 23009 21237 22387 21708 21419 16259 18631 21515 20344 21684 20355 21949 20909 21053 22208 24068 23600 21291 23305 21642 22676 21636 21509 21504 21168 22739 21447 21962 21445 21985 21511 21766 19075 20254 20939 20958 21701 21411 21632 21531 21477 26995 23024 22944 22050 22151 21721 21943 21521 21696 21914 21626 21892 21799 21326 22026 21321 22198 20993 20917 21104 21383 21265 21445 21848 21632 21799 21488 23859 22343 21914 22420 21536 22154 21597 21846 21604 21590 21993 21828 21770 21954 21465 21912 21175 22344 21341 22180 21442 21921 21428 21856 21877 21732 21765 21655 21904 21744 21719 22038 21405 22166 21327 22129 21370 21932 21733 21697 21511 21610 21912 21803 21403 22368 21331 22244 21388 21953 21316 21736 21825 21844 21748 21956 21367 21947 21241 22357 21381 21926 21807 21719 21648 21810 21524 21873 21285 22381 21443 22225 21561 21678 21671 21671 21731 21847 21164 22233 21384 21750 21953 21945 21737 22130 21312 22083 21414 21845 21642 21772 21568 21859 21208 22247 21467 22136 21618 21618 21794 21667 21667 21753 21238 22394 20787 21586 21988 21895 21637 22164 21190 22231 21682 21576 21753 21448 21574 21816 20837 22635 21357 21015 22625 21539 21205 23058 21286 22295 22528 21392 22276 22105 20968 22509 21486 21200 22349 21184 21194 22042 20534 22199 21551 20723 22452 21397 20581 22537 21194 20792 22848 21354 20667 23040 21157 21181 22881 21280 21005 23176 21063 21424 22929 21267 20560 22845 21106 21014 22771 21344 20873 22942 20452 21193 22664 21632 21716 21952 21604 21642 22272 21495 21511 22112 21672 21460 22191 21408 21460 22100 21657 21573 22149 21591 21463 22195 21636 21278 21977 21527 21408 21849 21711 21273 22201 21494 21517 21979 21737 21312 22302 21453 21665 21910 21800 21253 22144 21555 21497 21847 21754 21295 21882 21600 21645 21517 21929 21401 21705 21652 21696 21444 22070 21431 21613 21844 22050 21472 22001 21946 21743 21765 22372 21417 21580 21889 21751 21138 22181 21461 21555 21925 21789 21316 22386 21437 21536 21799 21775 21228 22347 21415 21678 21912 21815 21339 22382 21344 21635 21863 21844 21184 22374 21449 21832 21911 22243 21533 22400 21784 21580 21902 21765 21459 22348 21242 21887 21822 21721 21576 22176 21335 21927 21895 21928 21617 22403 21517 21952 21795 21920 21611 22281 21280 22054 21952 21909 21248 22381 21456 21698 21908 21748 21112 22209 21456 21570 21744 21858 21251 22212 21511 21598 21658 21976 21120 22100 21469 21639 21367 22161 21376 21670 21783 22026 21138 22285 21518 21657 21724 22092 21179 22171 21847 21816 21671 22247 21504 21896 21840 21874 21440 22352 21401 21650 21907 21732 21245 22350 21536 21680 21534 21981 21218 21947 21622 21667 21305 22020 21353 21760 21732 21870 21254 22227 21775 21725 21669 22297 21415 22041 21760 21832 21520 22377 21504 21765 14745 18243 18833 20224 20025 20096 19670 21006 20041 19984 26691 24372 22144 23174 22928 12835 18279 21253 19506 19972 21778 20772 19833 22227 20613 25783 24352 22979 21198 22188 22281 18136 19417 21684 21286 20764 21488 22684 20889 21037 28226 23515 21544 22937 21892 20959 18124 21177 21901 20872 20503 22644 20967 20375 21747 21863 22984 21865 22800 23348 20901 18979 21687 21451 20526 21158 22317 22144 20855 21946 22807 22512 21076 22119 22101 21644 21600 21953 22113 21585 21857 22044 21869 21696 22011 21648 21483 21632 21977 21756 21510 21918 22135 21632 21776 22110 21592 21386 22040 21681 21510 21493 21820 21640 21536 21916 22071 21560 21764 22041 21719 21393 21815 21610 21596 21506 22069 21729 21543 21844 22217 21680 21760 22045 21662 21297 21976 21684 21545 21488 21984 21600 21678 21831 22193 21638 21695 21969 21742 21216 21779 21756 22043 21510 21977 21991 21670 21209 22041 21666 21890 21281 22133 21738 21921 21213 21933 21635 21829 21205 22144 21667 21761 21527 22344 21429 21617 21377 22133 21521 21652 21817 22279 21479 21780 21922 21785 21121 22048 21477 21959 21248 22141 21723 21856 
41602 40736 34516 41324 34465 41620 36098 42299 35913 42093 36345 41584 35073 40436 35922 40464 34740 38730 34444 38180 32976 36996 34117 38176 33392 36408 41281 34953 32945 35418 41312 35547 33349 37225 42050 37208 33973 37807 35552 38662 34408 39182 35851 39785 35162 38487 34048 39611 36060 40128 34947 42056 34009 41633 36148 42888 36085 42438 36198 42528 35513 41912 34439 42293 33250 39911 42255 39440 40912 38704 41812 38744 42381 37456 41600 35956 34451 34456 38029 36117 41856 36759 36962 36891 39037 35177 33081 34006 40767 33237 39951 34122 39680 33546 40835 35095 39560 35104 40624 36999 41962 37658 42130 37807 33104 37418 41550 38780 42881 38600 41373 38768 38992 39836 41508 35584 35256 39207 36232 34241 34167 37335 38952 35563 33003 35786 33752 39648 41280 38440 36289 38709 34407 33729 41607 39004 37296 37113 40551 33297 36144 39885 43060 33449 41498 42288 35632 35648 41314 37616 37216 39297 40462 35157 42517 41778 33249 36095 34415 37620 37586 33696 37019 40977 35910 36361 39370 36336 38048 38992 40449 35088 42363 41241 39465 41236 36833 39888 40544 35792 43081 41792 42682 36329 31767 29811 36146 33604 33519 33731 32896 37120 41211 44276 38969 43528 34760 33927 40491 42583 42208 39120 33991 34377 36755 42011 35518 37667 37936 33552 39682 35079 42170 35884 38807 39531 35641 39056 41137 40680 43533 33527 38386 39223 40480 37582 32452 40342 36672 34288 40103 42008 34496 38825 38144 41961 35497 35452 39208 33600 33436 38561 38392 35987 42543 39501 39802 37322 33806 40465 35840 38420 40219 41856 34007 42352 41692 36245 34733 41624 36371 36211 34357 33879 39058 36619 39276 41696 36429 33464 39048 35827 37672 42445 39513 34636 41344 33446 35584 42560 37779 38147 38954 40160 36002 41773 42503 34827 35159 39862 37405 37627 40229 42022 35319 35864 41176 36029 37659 40784 39017 34560 40914 42090 34560 40501 39969 34916 38528 40336 33596 36178 40533 34695 32919 41769 41984 35909 37536 40398 38384 35768 40005 42046 43350 35494 43215 39483 32952 34073 39670 36965 33616 37331 34922 39105 38082 42522 33601 32039 41440 41397 42040 43229 42272 38982 33664 35003 41735 37832 40711 41867 37809 44082 35249 42940 33552 35435 38852 39745 41824 42850 34144 38624 38093 34857 41524 36440 37195 37676 38816 37256 41004 33344 33568 31919 37365 34310 34866 39217 38664 32516 36167 39095 35136 44997 35417 38531 40488 35936 39040 41800 33526 37265 41920 37603 37452 41235 34874 36096 39847 34678 42752 40936 35448 40704 42420 36088 40461 36700 35562 39892 37894 40320 40311 33408 42443 37143 41880 41668 35213 42516 35456 35992 40864 37737 36372 39682 36960 39888 42118 35096 40433 35193 34350 39329 34838 41104 37224 36210 39888 36091 40208 34391 32679 36711 39184 39604 38656 41534 41197 34387 39098 39096 39193 40448 33670 39037 41885 37557 40160 34465 37729 40269 35861 41880 42336 39013 38692 35312 42980 41152 40224 37971 38133 35072 40421 37864 36104 39156 39672 37721 36551 42642 33252 33795 42709 42081 34797 33712 39508 37307 40160 36505 34624 41674 35249 41303 35360 34257 36324 38603 39832 37624 39176 34675 33741 41932 35171 34904 36548 42344 39288 33105 41239 35724 42293 36395 39720 35840 36871 42500 34608 40068 36470 41383 36624 34916 36515 35893 38932 37793 39575 37778 41068 42638 36759 41040 35904 41219 33473 41472 35544 32496 35796 41472 38540 41682 41700 42903 41161 42280 41254 34346 41840 36280 41479 35883 41044 36288 41310 35510 37225 33797 34503 40780 35104 30038 35483 37006 35161 41561 36060 31985 37122 41220 44870 41175 43744 41324 32927 33655 42602 34160 42313 33104 39936 33024 41176 33408 40234 33024 39888 33001 38968 36535 39923 39867 41065 39053 41198 41225 42669 36218 36883 39072 38305 39562 38784 38821 38752 39541 40265 38579 40332 37573 40106 36573 38739 36251 38705 35255 35711 34496 33848 34903 36311 35762 35906 34264 34208 35407 34112 34048 41776 36181 33657 36502 42168 35376 32985 39274 42560 43542 41266 38156 39856 36530 39816 34207 40206 35509 32867 36753 35500 38444 35607 40312 36840 41624 34376 42886 34484 41818 33325 41401 42227 38529 42340 37633 39918 34582 40907 34244 41619 38374 33975 41169 37844 40197 37240 39232 37253 37109 42256 39459 40365 35368 40360 35781 35522 41242 35729 42356 33358 39090 42156 34377 41488 34390 41830 39127 37095 39760 37476 35880 34199 35993 37672 40856 37138 41874 36156 34704 43876 39508 42695 37161 40544 35315 36229 34304 34447 34899 37477 36219 41264 41305 34001 38848 41320 37611 42544 39304 41843 34488 40162 38384 41958 37266 41290 35508 38176 33914 41984 42679 37813 39760 37339 36324 35799 42281 33669 34072 38380 38250 40680 43178 34444 37988 35092 40246 35073 34268 42760 40551 42360 39265 42122 37440 35909 34820 35154 41861 39611 38600 39184 36757 36151 40080 34571 35004 43033 33024 38109 41443 35384 34937 40622 37792 36152 41376 34634 33152 42348 34816 40128 36992 34320 40896 41146 38357 38172 42571 36096 41093 40896 34688 39910 33814 35160 32790 40300 37100 37221 41720 34976 35144 42912 42370 35024 41137 37712 37366 36464 40824 35905 35402 42696 42394 36305 41271 38855 38676 36248 39458 33536 38279 43269 41750 42372 43840 39392 38483 41472 42406 39621 34183 37849 36337 34821 33828 33285 38440 36720 39108 38601 39323 38390 37632 40864 32727 34788 42135 38320 39444 35169 41303 34441 41751 34008 37949 37292 32944 42320 37767 36199 35127 42700 38576 38714 37591 41608 38902 34489 34979 42552 40464 38343 42688 41880 40923 42960 34855 41841 40896 36136 35336 41428 41426 33641 36700 40392 39273 37031 36220 40401 41998 41872 34840 42384 39833 43175 36437 33648 41716 41648 34760 34860 37793 41643 35514 35523 41349 42004 38785 36992 37991 40549 36247 35036 37522 41418 40341 37829 36408 39603 41520 43077 36535 40420 40681 34516 36428 35221 41938 41811 33978 35714 38644 40163 39245 42240 39556 38260 34281 36291 34848 38873 38477 42847 40341 40967 40390 40896 39920 40164 36019 42061 37259 37979 40193 38656 39752 44055 43896 38455 38116 37776 40473 32369 41026 35948 37837 36913 35172 39041 40460 38246 39207 42818 37104 37494 43192 41160 41930 38804 38790 36436 34074 40800 33386 42244 37266 38365 37990 34705 35401 40012 33883 42784 37444 35198 41556 33400 36359 40054 42410 35855 38740 36618 40771 33156 36148 39642 33145 36562 38340 35008 41449 40663 42835 33693 34009 40024 35448 35927 36573 41829 41932 37960 37941 36326 39992 40843 42823 34736 40011 40964 35936 35666 35079 41834 33632 36936 36995 37276 39843 41286 34894 35909 41112 40721 33121 35729 35563 38688 41104 41160 36041 38332 42872 42376 42059 36480 37536 37136 39859 40880 42148 34592 34757 36528 39656 37607 42755 34737 42918 40039 42891 33798 35591 39385 39485 41008 37321 33479 36352 38666 42132 42440 34586 41794 32928 36133 42304 35984 35063 37257 33369 37216 33336 34249 37988 34823 33568 35331 36634 36077 41793 39237 35840 37699 34474 34897 43468 41932 41627 39254 34544 41255 37940 34735 42464 36973 34826 41637 39668 33801 33803 40198 38983 42296 40455 33428 36360 39499 35833 35671 39608 42187 39537 35392 33784 35811 34646 35457 35472 41559 41584 41654 39136 33623 34858 36238 36388 41736 38870 40272 41172 42545 37613 36250 36025 36276 38468 40950 38528 40132 39982 32768 33226 38319 37066 42032 42738 40928 41101 33008 35384 33721 33216 37482 35821 34038 40176 41158 41306 41834 38486 42967 35596 35600 36581 41621 41437 41089 41111 41985 37473 41941 34343 38587 35898 34744 40457 41164 38992 40533 42050 41372 40576 33586 36945 41653 36080 38257 35370 35848 34070 33709 36122 42760 41539 37026 38166 35254 39553 38197 35015 32964 36081 32865 40650 36664 42608 38718 35288 37640 42997 43120 36503 41143 34464 34613 39030 39744 35088 38784 38373 40336 32714 33520 41355 34104 38227 40176 39728 37877 35465 33890 33355 33993 37639 34370 35539 42033 39525 35933 38797 34428 36290 33832 35726 38181 42338 36144 41258 41090 42272 39131 40889 41760 40874 39106 34304 33482 34656 34009 39360 36001 37161 35751 36088 34346 33345 38576 41216 37520 40708 41547 41991 41512 42634 37195 41261 37111 35984 34545 33888 33733 37315 36664 36136 36481 40544 37594 40448 42616 34759 39986 33352 36450 42373 36149 37351 37205 34487 35714 35987 36508 33386 40849 40615 41202 40237 41088 39760 39984 33423 36296 42652 37492 35183 35744 32874 34280 36637 36288 35496 36038 32598 32059 31722 41971 34900 41666 35522 38379 46185 43547 39068 40224 38694 42346 39061 35250 35144 34466 38774 40280 34960 37829 41398 36641 40632 32273 32873 39013 35445 39089 42678 40949 35479 37767 34020 45472 37066 43424 38631 42099 35872 34981 42937 36490 37061 42497 32097 38658 40448 42726 35593 42127 39432 33120 32834 41037 35112 41184 38228 36945 38400 40586 40246 35042 40781 42122 34656 34982 34214 32677 32379 39128 36107 42450 38320 42458 38516 33049 35590 37625 40401 37367 37456 35225 41896 34352 33129 42532 40737 39144 38116 38867 40205 35629 37904 32972 34736 37412 34432 37024 36327 41219 38848 41206 40802 37760 36897 38737 41846 40596 42576 36992 34130 36198 42656 38235 42210 37718 42782 33312 39893 34279 36665 34016 33757 38344 36516 35808 37833 42663 37687 39768 42120 41731 40520 42432 37734 42196 36942 37228 35506 35753 34636 37087 35579 35432 38730 42137 40458 41544 40020 41868 37940 35696 34976 32887 33960 37265 36384 41952 42416 41481 41268 41970 38090 41039 35715 36405 36657 35701 37863 41795 38260 40505 42404 41940 37853 36586 35504 34280 36141 32904 36880 40672 42816 42640 41087 33797 34855 34834 34821 35472 36846 39520 41136 41808 36023 37848 37948 35716 39761 40928 39527 42182 37008 34465 35773 33357 36804 39920 41408 42964 40167 34363 34064 35936 34720 34657 35785 40312 42824 35778 33688 38176 37376 34395 39983 39938 41222 35088 33536 35750 42267 33927 36245 35971 34841 41558 38109 34657 33130 39782 39406 40800 41737 33484 41408 41352 39840 37504 43994 43384 40020 42418 39808 39968 39008 32656 40484 33833 34656 42953 42160 33395 33317 39691 35463 36880 41492 34431 38864 39539 39936 37610 40460 37943 40651 38672 42025 38165 40528 32822 37040 38855 37869 36460 41171 36471 38257 42516 40075 35109 34019 35143 37693 34062 34268 40875 43282 33280 39328 34864 42336 40963 41984 42727 39712 34800 33571 39856 34164 42532 40825 34471 40582 38436 33280 41581 37034 35536 40481 40816 43177 33376 38240 35739 40725 41856 42848 34928 37351 36180 40248 39900 33637 42823 37140 35913 40960 37417 33907 34436 32929 37541 41928 35477 34435 34821 42138 39438 42496 34609 36576 38819 42592 38724 38007 36005 35733 42243 42371 34051 36965 35956 39032 40497 42784 33757 37507 36250 40877 42679 42769 33308 36165 36096 40209 42352 42449 35249 37336 36552 41363 42850 41494 34548 36998 36698 39496 42540 42742 36760 37584 41043 33465 42197 36121 33734 37312 35809 42455 42400 40755 37695 36675 35473 33538 40006 41516 37944 37434 37590 34208 42453 33315 37576 36221 37351 34294 41216 40683 39129 37880 37504 40031 42792 42635 35284 37272 35753 38865 40705 42535 33797 35426 36775 40248 40780 33182 33905 34504 38076 38817 39524 42944 34781 41638 40294 41561 35022 36040 38600 39159 41579 33320 34486 35402 39381 39913 40509 37079 36360 34889 41184 32789 36987 36544 37024 42102 42213 42280 34681 37328 35525 40515 42406 33322 34598 33161 38279 40101 38151 34425 34648 40826 38649 41600 35750 35469 37137 40299 41088 36305 35585 34739 41418 42404 39072 35642 36458 32768 42261 32857 35591 33012 38887 35137 39580 38080 38499 34169 37696 38160 37336 36884 43376 40056 40783 38016 32935 39400 40418 32336 36928 35826 35060 35858 40854 33602 37620 43012 38901 40096 40637 41453 38292 41403 35104 40633 35271 42574 35606 36454 38167 43538 44704 33620 37947 37215 37554 37946 39735 37605 36236 32138 34610 37459 41655 35988 37121 38596 37116 36369 42369 37026 36652 35099 42476 32808 39216 42005 40000 36472 37856 36787 43676 38789 39936 39720 34614 33746 37734 39653 33880 36698 38880 37248 34924 38704 34437 42823 34372 38192 35987 32787 37458 40108 34272 35616 39706 34000 41532 38932 34984 32747 42711 36780 34327 32899 37359 39335 33574 35498 38776 35627 41648 36723 34190 33880 32512 38998 35570 33333 36509 40808 34923 35431 38931 34912 40636 38320 34994 33251 42465 38423 33939 34868 36607 40449 34521 35230 37999 35883 39860 36096 35909 38919 32961 38092 38592 34893 39946 38966 34768 37015 40555 40128 35829 37416 40216 37992 34412 36480 39960 39889 34926 35552 33091 41781 42500 34448 41355 40177 33100 34291 36341 41369 43112 36145 37476 36106 38833 38800 42889 38404 40100 40313 35758 36692 
23265 22934 23788 23271 23760 23099 23552 22954 23382 22784 23335 22796 23200 22762 23208 22800 23285 22924 23229 22920 23288 22833 23157 22865 23289 23004 23296 23067 23360 23117 23232 22919 23222 23027 23313 22894 23181 23079 23305 22982 23153 22976 23123 22838 23172 22887 23280 22843 23252 22784 23257 22744 23281 22742 23317 22819 23444 22777 23383 22895 23589 23127 23584 23193 23794 23415 23764 23513 23749 23552 23763 23463 23646 23505 23568 23495 23589 23354 23552 23484 23665 23458 23578 23510 23506 23340 23328 23168 23288 23152 23383 22949 23351 23017 23438 23035 23307 22922 23449 22819 23350 22781 23345 22768 23408 22750 23340 22796 23171 22622 23143 22647 23145 22517 23047 22454 22904 22394 22787 22273 22859 22343 22612 22564 22671 22826 22835 22788 22650 22272 22661 22339 22601 22167 22711 22704 22871 22985 22926 23079 22979 22661 22840 22829 23016 23250 23308 23476 23928 23469 23464 23057 23629 23766 23918 23088 23507 23256 24136 23380 23735 23433 23912 23405 23531 23661 23963 23507 23579 22977 23563 23640 23936 23125 23821 23393 23633 22979 23560 23576 23840 23127 23638 8113 15251 15505 16420 16406 17029 17085 17177 17131 17668 29997 27021 25179 25164 25040 24626 24002 24599 24240 23880 23107 23647 24936 24402 23233 23705 23855 24349 22867 23513 24227 24591 22945 22784 23157 24825 23588 23105 23061 23544 24274 23127 23225 24055 24260 23498 22742 23379 23923 23696 23259 23136 23481 23811 23661 23252 23452 23547 23641 23105 23273 23469 23686 23499 23332 23692 23745 23479 23473 22915 23382 23543 23772 22996 23317 23005 23960 23257 23496 23224 23688 23454 23500 22998 23457 23064 23984 23140 23393 22960 23612 23451 23523 22949 23424 23072 23968 23334 23338 22871 23424 23482 23808 22912 23305 22936 23925 23284 23418 22836 23421 23349 23780 23254 23504 23056 23543 23095 23893 22787 23665 23321 23744 23191 23329 23096 23658 23239 23651 22889 23447 23345 23730 23083 23223 23072 23558 23173 23740 22908 23560 23443 23711 23412 22722 22950 23905 23767 23085 22121 22661 23813 24246 23237 22409 22935 23945 23568 24039 22937 22792 22636 23082 24389 23493 22833 23073 22954 24560 23432 22725 23076 22985 23687 23355 23028 22890 23148 23460 23484 23425 22961 22968 23388 23169 23658 23136 23117 22847 23255 23380 23540 15248 17103 17506 18032 17931 18977 18648 18886 18345 18880 26376 25367 24869 24833 23858 23933 23562 23824 23308 24286 23611 23810 23045 23573 23011 23516 23498 23816 23270 23597 22919 23542 22944 23911 23253 23820 22996 23239 22800 23585 23220 23452 23496 23792 23112 23525 22700 23265 22844 23816 23207 23717 23024 23145 22748 23460 22982 23323 23271 23535 23297 23444 22752 23125 22908 23366 22866 23691 23049 23804 23376 23478 23036 22912 22430 23056 22775 23100 24076 23898 24217 23988 23162 23024 22483 22215 22994 22846 22606 24472 23876 24272 23692 22934 22567 22599 22127 23094 22950 22820 23796 23740 23556 23276 23335 22864 23187 22793 22759 23225 23130 23400 23308 23566 23576 23072 23129 22791 22951 23106 23264 22869 23622 23192 23660 23310 23344 22933 23052 22787 23260 22868 23205 23207 23408 23383 23588 23345 23641 23060 23407 22737 23069 22732 23142 22856 23084 22813 23591 22939 23724 23127 23789 23184 23668 23024 23359 22942 23108 22656 23405 22732 22647 22873 23303 23033 23144 23157 23383 23154 23540 23311 23664 23175 23657 23116 23607 23058 23417 22744 23244 22712 23235 22711 23141 22756 22932 22807 23081 22784 23278 13959 18449 18641 19600 19243 19855 19564 20169 19691 20303 26449 25160 23794 24120 23261 24315 23208 24074 22947 23874 22855 23801 22696 23493 22660 23222 22780 22999 22765 22759 22937 22595 22851 22516 22837 22264 22804 22213 22793 22903 22997 22915 23079 22955 23041 22969 23110 23227 23280 23331 23413 23373 23600 23302 23604 23298 23665 23345 23750 23203 23665 23303 23687 23269 23656 23127 23740 23089 23699 23089 23693 23104 23741 23175 23676 22962 23641 22982 23660 22900 23501 22748 23303 22808 23269 22742 23124 22837 23052 22732 23040 22773 23186 22777 23324 22801 23521 23041 23618 23233 23694 23369 23635 23277 23387 23105 23121 22802 23305 22647 23189 22675 23332 23040 23446 23053 23733 23097 23700 22861 23435 22757 23245 22859 23012 22670 23488 23112 23632 23353 23351 23216 23172 22829 23259 22593 23049 23075 23601 23242 23841 22913 23473 22787 22776 22665 22396 22375 23047 23430 24197 24202 23066 23175 22810 22068 22792 22674 23320 23927 24419 23303 23683 22519 22231 22523 22967 23753 24120 24150 22740 22330 22904 22912 22885 23429 23426 23232 23091 23251 22792 22947 23401 23612 22951 23346 22896 22880 22694 23224 23181 23531 19437 20308 20247 20575 20892 21371 21196 21608 20817 27216 24093 24183 23867 23878 23342 23188 22849 23394 23168 23847 23001 23552 22753 23152 22919 23745 23286 23222 22760 23081 23085 23607 23087 23632 22742 23096 22738 23689 23319 23280 22795 23380 22751 23233 23223 23737 22812 23128 22681 23586 23264 23339 22754 23264 22845 23552 23191 23680 22146 23029 22890 23639 23191 23235 22632 23279 23180 23552 22864 23127 23062 23479 23297 23191 22656 23461 23203 23466 22740 23261 23900 23097 22229 22842 23783 24423 22612 22211 22856 24032 23582 22914 22898 24445 22722 22281 22727 23784 24273 22787 22081 23497 23461 23104 22377 23700 24316 22744 22729 23189 23444 23076 23001 23223 23645 23016 23025 22978 23464 23380 23297 22989 23627 22905 23054 22845 23572 23281 23412 23000 23641 22910 23029 22905 23502 23093 23141 23109 23821 22848 23044 22887 23636 23206 23766 22769 23753 22803 23141 22784 23546 22933 23233 23145 23622 22793 23048 23111 23393 22793 23128 23171 23555 22932 23399 23361 23303 22580 23251 23132 23464 22759 23520 23259 23151 22700 23720 22840 23210 22855 23695 23032 23216 23089 23728 22759 23072 23255 23391 22753 23028 20371 22057 20935 21970 22272 22060 21549 22183 22084 22342 23776 24045 23497 23304 22826 23821 22955 22649 22723 23676 22789 22732 23913 23953 22766 23364 24272 22879 22055 23868 23019 22601 22433 24161 23524 22980 23237 24424 22656 22413 23943 23105 22185 22555 23776 23988 23044 23104 23674 22918 22943 23242 23374 22967 22928 23317 23591 22961 22912 23473 23256 22803 23012 23303 23463 22932 23282 23341 23176 22758 23356 23136 23456 22977 23364 23399 23137 22666 23644 22929 23133 22856 23556 22915 23105 23061 23768 22460 23231 23308 23250 22601 23554 22935 23173 22755 23552 23156 23405 22845 23859 22819 23269 23263 23198 22545 23460 22908 23191 22679 23625 23136 23163 23085 23732 22796 23532 23216 23266 22699 23884 22756 23099 23139 23237 22592 23288 22995 23119 22829 23457 22894 23077 23209 23284 22769 23566 23042 23064 23194 23645 22862 23465 23374 23102 23018 23872 22738 22912 23968 22933 22170 23268 23287 22491 22563 23979 23041 22661 23815 23245 22427 23878 22629 22598 23726 22637 22656 24133 23104 22565 23926 23364 22390 23966 22471 22976 23639 22849 23159 23234 23257 22829 23446 23011 23045 23271 23001 22999 23191 22753 23464 22951 22965 23189 23153 22703 23590 22841 23047 23456 22977 22949 23611 22892 23515 23036 23147 22951 22996 23186 23146 22935 23703 23032 23507 23147 23209 23063 23239 23022 23252 22663 23856 23271 23427 23201 23181 23106 23327 22721 23442 22650 23539 22791 23135 23199 23272 23002 23656 22738 23570 22800 23319 22807 23120 23340 23226 23079 23557 22629 23666 22800 23234 22883 23077 23186 23288 23085 23591 22594 23490 22641 23591 22853 23144 23330 23163 23126 22993 23153 23185 22987 23522 22638 23341 22610 23737 22789 23564 22996 23051 22929 23014 23766 22990 23466 22476 23838 22849 23840 22857 23097 22833 22413 24122 22393 24135 22347 23946 23143 23430 23737 22609 23525 22259 24030 23131 23386 23633 22427 23351 22080 24374 22665 23738 23090 22877 22933 22960 23426 22699 23225 22725 23552 22976 23395 22851 23503 22916 23285 23239 23089 22929 23023 23425 22921 23176 22916 23373 23232 23292 23197 23089 23156 23089 23520 22743 23523 22775 23713 23241 23420 22993 23169 22816 22969 23279 23081 23096 23143 23227 23288 22932 23513 22639 23321 22641 23745 22864 23632 22688 23507 22807 23493 23063 23129 23144 23045 23249 23168 22858 23537 22568 23397 22628 23813 22921 23565 22903 23334 22845 23047 23280 22965 23143 23281 22940 23160 22844 23608 22613 23466 22512 23744 22784 23540 22561 23701 22729 11491 14024 15169 15328 15954 16317 16401 16493 16524 16913 28913 26583 25820 24949 24804 24248 24891 23936 24517 23677 24128 23556 23817 23861 23554 23641 23491 15030 16759 17617 17856 17709 18277 18228 19245 17705 18861 26233 27020 24836 25712 24314 24507 23609 23879 25109 23688 24605 23205 23898 23334 23320 24676 22906 18248 17603 20393 18963 20431 19618 20044 19463 19220 29892 25481 25685 24192 24598 23696 23817 24839 23041 24167 22652 24367 23975 23683 23684 23275 23691 23159 20263 20352 21010 20476 21259 20867 21191 21306 20912 26181 24439 24400 23876 23883 23964 23341 23739 23204 24096 22906 23736 23544 23488 23569 23540 23340 20514 21499 22418 21617 22337 21760 22643 22278 22557 22184 24379 23574 23669 23797 23959 23463 23799 22969 23648 22890 23936 23075 23556 23488 23356 23396 23337 23427 23377 23251 23788 22849 23648 22803 24035 23115 23841 23112 23596 23016 23387 23537 24008 23324 23605 22957 23450 22892 23913 22969 23874 23024 23640 22893 23240 23469 23450 23181 23716 22778 23607 22733 23879 22995 23597 23317 23335 23280 23301 23280 23387 22776 23870 22952 23820 23148 23305 23013 23272 23403 23453 23028 23851 22813 23902 23015 23380 23122 23389 23049 23509 22799 23876 22989 23440 23521 23418 23291 23685 22796 23774 23213 23191 23229 23233 23328 23296 23010 23861 23010 23692 23223 23293 23219 23223 23317 23408 22772 23728 22941 23302 23584 23539 23123 23861 22819 23735 23247 22872 23471 22999 22757 23680 22421 23444 23022 22437 24014 22944 22381 24576 22825 23440 24221 22843 23893 24329 22745 24085 23453 22724 23997 23104 22467 24045 22414 23204 23380 22795 22676 23746 22239 23380 23267 22425 23335 23245 22032 23676 22989 22243 23624 23237 22127 24121 23429 22446 23239 23288 22240 23375 23095 22307 23511 23052 22199 23829 23171 22877 23651 23028 22961 23236 23289 22795 23450 23115 23069 23174 23345 22881 23339 23136 23008 23335 23261 22862 23496 23239 23184 22917 23443 23034 23072 23328 23092 23048 23392 22928 23367 23140 23104 23180 23313 22814 23272 23125 23235 22896 23545 22971 23117 23262 23277 22877 23562 23082 23082 23360 23440 22906 23638 23188 23173 23261 23655 22942 23436 23367 23301 22913 23725 22872 23138 23183 23437 22840 23109 23177 23273 22721 23556 22810 23323 23056 23162 22816 23520 22807 23433 23003 23188 22976 23432 22670 23641 22887 23124 23201 23638 22717 23395 22940 23181 23068 23390 22700 23699 22840 23050 23333 23410 22727 23545 22894 23042 23263 23280 22706 23728 22792 23232 23323 23300 22583 23864 22789 23217 23271 23365 22674 23845 22827 23147 23370 23275 22542 23685 22835 23141 23098 23307 22679 23482 23040 23216 22743 23545 22877 23288 23061 23269 22764 23663 22946 23116 23087 23431 22632 23704 22957 23200 23172 23783 22875 23584 23255 23218 23053 23799 22775 23527 23296 23307 22840 23805 22925 23175 23346 23270 22696 23672 22903 23043 23261 23312 22688 23485 23033 23122 22717 23690 23097 23137 23303 23538 22742 23631 23172 23207 23248 23535 22921 23565 23254 23286 23112 23831 22852 23193 23479 23197 22656 23728 22887 23097 23314 23271 22561 13140 14738 15490 15043 16637 16461 15963 16837 17419 30616 28042 27126 25338 24649 26078 14856 16409 18261 18132 17218 18586 18839 18024 18599 19445 26834 25644 26144 24908 24064 17124 19529 19111 20005 21144 19984 19307 20975 20010 19001 27503 25591 24504 24120 25372 24327 20016 20323 22189 20712 20245 21025 22012 20813 20753 27207 25760 24157 24046 24823 23939 20598 21689 23040 22695 21776 22725 23526 22107 21298 23125 24514 23834 23128 24019 24039 23445 23644 23904 23545 23110 24008 23300 23303 23209 23831 23497 23296 23620 23889 23466 23445 23861 23479 23168 23895 23439 23298 23093 23812 23538 23344 23643 23764 23383 23373 23765 23351 22997 23419 23513 23465 23077 23767 23428 23415 23481 23901 22839 23328 23698 23367 22926 23719 23284 23428 23012 23746 23354 23283 23518 23767 23127 23468 23688 23365 22899 23555 23376 23492 22992 23815 23577 23341 22865 23732 23252 23357 22919 23799 23446 23469 23162 23864 23181 23393 22912 23705 23375 23452 23210 23944 22967 23184 23225 23644 23063 23399 23273 23863 22727 23380 23442 23413 22769 23553 23141 23476 22804 23759 23407 22799 23042 23909 22921 
21286 20702 21767 21213 21218 20768 21316 20723 21458 20899 21719 21085 21809 21305 21841 21303 21985 21648 21710 21901 21458 22016 21760 21965 21872 22629 21899 22521 21901 22845 21941 22522 21771 22343 21801 22031 21044 22477 21752 22228 22077 22056 21977 22230 21715 22334 22016 22241 21862 22249 22144 22034 22040 21898 21836 21932 21787 22034 21905 22027 21901 21979 21872 22217 22005 22376 22391 22572 22408 22758 22443 22598 22569 22744 22514 22887 22671 22835 22615 22805 22501 22945 22657 22855 22728 22662 22689 22479 22467 22510 22451 22503 22429 22455 22289 22405 22318 22355 22097 22331 21963 22391 22002 22148 21736 22402 21985 22842 21817 22009 21844 22252 21898 22414 21789 22499 21666 22528 21668 22485 21659 22454 21481 22266 21416 22224 21432 22117 21463 22279 21364 22339 21379 22299 21334 22153 21572 22080 21495 22091 21525 22071 21512 22103 21588 22186 21697 22237 21893 22423 21858 22474 21812 22284 21836 22371 21787 22457 21774 22332 21594 22344 21748 22391 21824 22373 21851 22508 22009 22531 22067 22836 22205 22881 22380 23022 22272 22896 22322 22977 22240 23063 22233 23040 22067 23060 8430 9399 10094 10226 10179 11415 11187 27575 25699 25937 25483 25354 23877 24364 23655 23965 22595 23671 23299 23407 22052 22863 22215 23546 22008 22656 22277 22879 21874 22162 21827 22996 22132 22038 21507 22452 22305 22530 21566 22649 22039 22645 21351 22465 22246 22604 21521 22103 21489 23123 22075 22017 21429 22389 22016 22112 21661 22576 21987 22570 21499 22167 22093 22531 21888 21904 21127 22840 22177 22344 21448 22108 22431 22579 21304 22427 21935 22841 21292 21480 21798 22284 23181 21806 20820 21646 21763 23271 21440 21201 21367 21917 23410 22432 20843 21008 21554 23704 22663 21329 20689 21548 23520 22786 21171 20540 22294 22242 22353 22192 21947 21689 22231 22048 22677 21840 22000 22020 22370 22249 21853 21724 22433 21836 22713 21717 21977 21905 22663 21957 21864 21671 22543 21963 22777 21741 22158 21921 22491 22136 22237 21579 22465 21918 22777 21376 22248 21992 22555 22082 22060 21551 22659 21991 22806 21688 21990 21568 22336 22186 22675 21297 22353 21595 22989 21957 22104 21588 22240 22353 22725 21491 22009 21609 22964 22112 22750 21606 22317 21968 22452 22327 22272 21452 22103 21660 22872 22075 22647 9751 11340 12187 13452 14213 14947 14585 14905 14948 27974 27417 27876 26235 24917 23594 24073 24015 23927 25195 24256 22621 21986 22400 23171 22592 24562 23505 22912 21257 21816 21723 22428 24081 23585 22566 21686 21553 21475 21788 23621 22753 22867 22919 22116 22371 22036 22129 22152 23009 22578 22688 22272 22016 21811 22369 22344 22606 22680 22870 22576 22361 21835 22072 22056 22611 22180 23057 22343 23090 22358 22496 21744 22204 21513 22419 21868 22531 22441 22869 22351 22824 21666 22280 21530 22276 21812 22692 21851 22904 22276 22828 21960 22392 21439 22332 21517 22326 22053 22551 22445 22728 22272 22349 21728 22304 21776 22429 21592 22951 22048 23197 22157 23137 22230 22345 21656 22316 21587 22227 22180 22513 22478 22759 22464 22671 21909 22221 21633 22120 21991 22686 22002 22940 22447 23119 22351 22765 21844 21593 21121 21447 20544 21809 21525 22055 22372 21779 23566 23019 23488 23179 22441 22181 21636 21762 21091 20995 21283 20951 21637 22506 21696 23165 22045 22779 22425 22570 22687 22584 22764 22581 22690 22145 22252 22081 22209 21840 22041 21716 22050 21771 22010 21877 22029 21833 22160 22166 22350 21915 22905 21985 13547 13729 15604 15345 16897 16280 17819 17110 18197 17533 27830 25952 26313 24548 25355 23941 24807 23403 24311 22910 23812 22713 23668 22568 23559 22446 23393 22183 23152 22103 22978 22152 23002 22133 22965 22054 22695 22208 22419 22246 22371 21888 22359 21885 22346 21675 22435 21619 22448 21740 22645 21836 22711 22133 22807 22417 22761 22272 22864 22421 22638 22215 22764 22471 22983 22474 22923 22602 22949 22521 23001 22635 22881 22363 23015 23030 23205 23198 23122 23630 23041 23477 22400 23248 22065 22592 21889 21896 21928 21937 21913 20973 21746 20674 21360 20895 21325 21128 21617 21760 22547 22793 22646 22951 23878 22620 22629 22260 22108 22087 21799 22132 21827 22097 21873 22007 22129 22658 22549 22910 22223 22720 21969 22425 21880 22059 21663 22248 22184 22784 22567 22691 22435 22363 22012 22369 21633 22065 22024 22671 22272 23099 21926 22881 21895 22465 21902 22174 21461 22528 22093 22914 22480 22425 22069 22716 21598 22115 21757 22792 22358 23203 21929 22842 22039 22245 21537 22584 22295 22921 22376 22496 21848 22369 21652 22409 22151 23176 21757 22580 21571 22104 21906 22990 22584 22592 22185 22855 21509 22017 21825 22869 16403 17814 17476 18112 17952 19044 19212 19854 19608 25906 24764 24551 24085 24576 23467 23708 22528 22231 21637 23173 23982 23114 22705 22061 21257 22475 23301 24203 21855 21361 21362 21936 23108 23243 23479 21888 20836 21833 22787 24039 22007 22528 21378 21080 21831 22646 22904 22326 22139 22045 22882 22756 22238 21923 22129 21975 22752 22362 22475 22084 22247 22519 22811 22383 22582 21840 22864 22407 22741 21890 22382 22561 22653 22210 22357 21895 23021 22141 22390 21725 22820 22518 22317 21625 22608 22216 23077 21828 22405 22401 22592 21746 22167 22296 23015 21854 22310 21839 22935 22155 22560 21876 23203 21952 22216 21878 22785 22016 22361 21984 23097 21847 22293 21637 22807 22391 22579 21509 22724 22140 22514 21542 22839 22532 22443 21546 22720 22182 22440 21591 22650 22599 22753 21799 22924 22071 22209 21677 22810 22537 22560 21542 22720 22417 22765 21360 22394 23671 21237 20743 23584 22071 21115 21713 23128 23212 21843 21530 23896 21701 20893 22047 22797 21742 21424 22853 23521 21752 21000 23060 22213 21344 21755 22740 22236 22086 22240 22948 22374 22007 22396 22380 21777 22136 22496 22624 21976 22509 22674 22251 21587 19692 19577 20377 19863 20897 20820 20481 20255 21776 20610 23833 23264 23721 22628 22852 22757 23404 22148 22528 22701 22615 21813 22967 22131 22467 21687 23016 22327 22452 22179 23173 21944 22185 22369 22617 21606 22400 22272 22781 21537 22940 22407 22760 21591 22630 22001 22472 21695 22766 22359 22624 21782 23084 21836 22279 21815 22933 22191 22327 22067 23118 21755 22169 22433 22576 21843 22199 22336 22865 21865 22341 22574 22476 21841 22113 22418 22820 21816 22578 22748 22376 21382 23185 21948 21603 21013 23334 22412 21523 22521 23739 21517 21660 23771 21864 20890 23367 22708 22083 21103 23314 22856 21546 22475 23931 21565 21408 23616 21830 20628 22055 22416 21852 22224 22313 22470 21730 22684 22299 22005 22449 22775 22001 22464 22674 22285 21952 23005 21936 22084 22443 22291 21697 22864 21838 22021 22342 22277 21533 22263 22144 22379 21668 22741 21817 22247 22249 22517 21689 22863 22356 22451 21796 23101 21666 22268 22275 22412 21457 22887 21764 22145 22442 22387 21465 23143 21789 22247 22124 22532 21427 22842 21746 22056 22471 22377 21813 22983 21891 22128 22351 22460 21444 22976 21760 22065 22272 22452 21721 23031 21723 22674 22415 22028 21779 22881 21625 22673 22304 22133 22260 22533 21645 22637 21572 22660 21888 22051 22537 22326 21962 22824 21231 22738 22073 21684 22245 21352 22849 21800 21437 23882 21266 23147 22249 21429 22765 21076 22395 21890 20736 23729 21991 21818 23700 21784 22935 21974 21234 22961 21008 23088 21521 21354 23749 21495 22735 21959 22227 22059 22032 22358 22258 21811 22921 22009 22519 22070 22193 22253 21806 22613 22333 22066 22904 21600 22665 21598 22839 21291 22448 22188 22097 22081 22048 22515 22347 22240 22178 22199 22436 21575 22936 21509 22664 21491 22834 21920 22889 21635 22726 21623 22535 22221 22133 21956 22169 22241 21875 22153 22662 21744 22597 21531 22990 21625 22901 21856 22408 21795 22299 22468 22279 22192 22447 21944 22327 21720 22995 21570 22589 21544 23160 21702 22980 21461 22960 21639 22790 22095 22409 21796 22123 22407 22192 22197 22176 22417 22442 22227 22441 22154 22305 21879 22805 21608 22571 21511 22951 21957 22647 21976 22332 21809 22195 22552 21888 22339 21977 22507 22208 22167 22589 21036 22732 20791 24064 21396 23207 21250 23082 21564 22225 22913 21451 22515 21069 23181 21597 21875 23308 21033 22741 20712 23928 21476 22932 21893 21890 21779 21333 23632 21860 22757 22209 21553 21920 22055 22408 21804 22156 21905 22602 22030 22421 21936 22595 22193 22298 22423 7508 9799 10898 13143 12535 14059 13555 15109 14722 15633 29350 28965 27283 26801 26159 25393 25367 24736 24611 24215 23684 24612 22941 23930 22741 24104 22792 12083 12636 14936 14737 15906 16337 16708 16706 17182 29794 28869 27713 26935 26014 25736 24688 25428 23703 24861 23271 24480 23207 23873 23363 23222 23010 23087 14832 15921 16653 17496 17465 18400 18212 19586 18254 28953 26624 27159 25094 25595 24556 24581 23863 23712 23849 23543 23488 23472 23104 23356 22477 23805 16247 18135 17499 19515 18401 20093 19686 20114 19761 20201 26612 25111 24757 25047 23600 24180 23076 24151 22894 23758 23010 23097 22906 23080 23051 22948 22444 20273 19441 20845 20198 21829 20651 21719 21117 21432 21085 24448 24280 23600 23552 23589 22311 23337 22253 23855 22330 23214 23323 21764 23010 21741 23529 22784 22461 23579 21637 22968 20879 24205 21680 23485 22117 22903 22023 21927 23789 21597 23247 22743 21765 22272 21313 24128 21304 23376 21291 23107 21868 21918 23767 21962 22497 23098 21424 22817 20881 23915 21917 22821 23113 21658 22712 21369 22866 21778 22669 22656 22250 22576 22436 22221 22405 21907 22958 22216 22647 22560 22061 22503 22061 22422 22315 21943 22868 22154 22294 22679 22313 22348 22722 21625 22830 22062 22624 22112 22157 22178 22610 21785 23136 22077 22681 22443 22206 22359 22129 22251 22418 21728 23134 21595 22589 22545 22548 22112 23091 21710 22944 21921 22318 22181 22288 22263 22612 21586 23000 21896 22361 22584 22688 21990 23079 21672 22771 22362 22272 22311 22810 21657 22773 21424 22685 22023 22212 22147 22624 21501 23010 21760 22152 22462 22404 21849 23129 21820 22236 22546 22768 21806 23224 21770 22695 22541 22567 21891 23176 21790 22668 22570 22501 22035 23127 21782 22475 22487 22329 21889 23127 21623 22762 22491 22396 22260 23045 21800 22821 22423 22306 21890 23091 21810 22602 22487 22141 21764 23149 22057 22516 22300 22447 21805 23270 21896 22624 22467 22453 21537 23053 21747 22283 22473 22472 21772 23131 21277 22373 22541 22173 21889 23056 21884 22149 22513 22371 21735 23013 21799 22046 22501 22417 21596 22881 21852 22044 22280 22394 21655 22599 22128 22160 21969 22744 21968 22151 22289 22740 21713 22840 22371 22097 21817 23173 21841 22053 22532 22370 21435 23450 21987 21826 23287 22299 21137 23593 21559 21517 23597 21800 21163 24040 21716 21555 23780 21837 21576 23732 21568 21320 23737 21810 21377 23912 21634 22384 23620 21836 22029 24057 21687 21728 23696 21744 22045 23776 21472 22231 23319 21309 22811 23372 21597 22694 23488 21433 22403 23601 21220 22773 23424 21427 22503 23488 21596 21952 23719 22045 21401 23917 21079 21347 23543 21691 21755 22621 22433 21707 22954 21932 22055 22436 22362 21658 22912 21873 21975 22536 22315 21808 22284 22295 22059 22025 22402 21961 22148 22471 22228 21697 22616 22208 21797 22536 22647 21613 22530 22486 22139 22025 22981 21910 22427 22564 22592 21794 23032 22038 22066 22153 22427 21584 22743 22042 22007 22193 22395 21623 22536 22086 22213 21833 22502 21774 22301 22247 22888 21513 22800 22460 22261 22201 22976 21612 22569 22421 22340 8412 11449 11693 12776 13600 14544 14014 15490 15019 30519 29157 28919 26940 26473 25777 14076 13945 16256 16777 17100 16927 18551 17803 18448 30328 29776 27456 28268 26056 25850 15821 17363 17079 18543 18790 19624 18699 19981 19919 20004 28522 28336 26039 25963 25542 19349 18435 19520 19865 20932 19875 20858 21041 21170 20213 27715 25795 25577 24064 25024 24384 21061 20797 22249 21259 21606 21318 22479 21702 22007 24783 25376 23739 23754 23621 24002 22896 23097 23311 23888 22553 23563 23025 23340 22357 23749 22381 23001 22385 23410 22432 22840 22635 23320 22176 23293 22784 22835 21845 23413 22432 22628 22335 23191 22193 22531 22689 23275 22297 22464 22753 22647 21853 23068 22179 22419 22161 23142 22311 22336 22592 23108 22061 22657 22850 22551 21900 23110 22197 22241 22266 22814 22193 22456 22568 23288 22090 22448 22813 22531 21689 22539 22547 22969 21813 22647 22742 22566 21721 22752 22381 22656 21392 22947 22858 22593 21504 22631 22636 22124 21185 23084 23355 22030 21481 23960 22006 21753 21484 23419 22467 21523 22658 23955 21772 21558 23615 21928 20712 21854 23079 22718 21109 22880 23586 
