# Supplementary material for: An Active Feature Selection Strategy for DWT in Artificial Taste
Source: Hindawi journal article supplement (doi:10.1155/2018/9709505), 2018-01-01
Supplement: f1 [file 9709505.f1.zip › oolongTea-low-2.txt]

43468 43478 41526 38249 165 13428 19247 19341 21422 21391 22942 21655 22562 21554 22726 22458 22916 22290 22624 21752 22865 22487 23496 22136 23170 22272 22872 22305 23347 22605 23018 21824 22779 22257 23562 22178 23384 21847 22726 22017 23296 22713 23221 22389 23105 21877 23080 22550 23642 22300 22941 22117 22784 22183 23372 22813 23072 22208 22939 22151 23328 22493 23469 22226 22812 21801 23127 22637 23222 22476 22934 22012 23217 22680 23531 22131 22823 22065 22945 22490 23259 22821 22947 22105 22639 22416 23412 22484 23324 22037 22707 22050 23058 22914 23376 22911 22903 22470 22961 22005 22805 22579 23430 22544 23312 22361 22784 22019 22920 22789 23287 22984 22807 22310 22684 22048 23002 22784 23698 22389 22749 21954 22248 21512 23017 23393 23064 22902 22447 21536 22119 22569 23879 22861 23605 21993 21546 21515 22897 23249 23466 23504 22450 21399 21771 22528 23924 22747 23361 22106 21601 21966 23228 23766 23001 22892 22474 21657 21793 22051 22920 23175 24053 22112 22229 21874 22080 22935 23514 23892 22835 23064 22272 21414 21850 22742 23626 23015 22940 22868 22132 22661 22592 23348 11483 17287 17689 18513 18449 19517 19569 19865 19968 19443 28895 25811 24558 24516 23706 24023 22857 23252 22589 22873 22277 23044 23045 23280 23130 22996 22465 22732 22324 23162 22721 23516 22701 23584 22528 22898 22340 22772 22742 23341 22901 22957 22297 23112 22125 22767 22592 23427 22450 23458 22074 22772 21948 23143 22857 23349 22935 22912 22253 22823 22137 23175 22598 23584 22401 23116 22194 22794 22165 23298 22848 23341 22861 23130 22418 23008 22020 22887 22136 23334 22464 23662 22136 23186 22004 22881 21989 22969 22464 23385 22756 23030 22329 23109 21975 22916 22478 23575 22504 23639 22164 23095 21953 22784 21925 23269 22665 23414 22676 23024 22377 23032 21946 22759 22078 23220 22605 23747 22498 23466 22025 22976 22118 22842 22336 23285 22806 23269 22620 22985 21988 22747 22130 23292 22405 23585 22192 23334 22336 22707 21876 23245 22624 23378 22848 23275 22563 22944 22112 22816 21948 22764 22569 23509 22449 23470 22247 23040 22227 22676 22281 23185 22745 23176 22781 22844 22360 22885 22103 22632 22128 22963 22632 23476 22351 23246 22300 22718 22096 22720 22231 23145 22901 23056 22845 22907 22355 22875 21953 22648 22275 23104 16965 19861 19737 20977 20275 20489 20053 20365 20211 31878 26762 25024 24591 23278 23121 22938 21605 22496 21527 22085 22108 23065 23146 24151 22909 24064 22224 22620 22208 21699 21601 21947 22352 23450 23287 23568 24049 22849 23617 22353 22243 22520 21371 21906 21765 22946 23044 24074 22854 23896 22140 23054 22245 21600 21560 22057 22499 23444 23837 22916 23360 22336 21724 22144 21388 21936 22520 22464 23141 23900 23193 23561 22759 22566 22640 22144 22481 22354 23096 22840 23407 22345 23065 22792 22958 22487 22539 22139 22671 22317 23044 22959 22987 22976 22756 22624 22165 22380 22611 22233 22647 22547 22992 22774 23306 22705 23452 22558 23186 22273 22857 22435 22592 22104 22602 22097 22903 22504 23207 22820 22952 22649 22848 22279 22616 22071 22465 22432 23120 22512 23240 22590 23379 22320 23220 22255 22752 21896 22791 22101 23216 22766 23271 22889 23192 22936 22880 22570 22936 22045 22864 22085 22673 22499 23351 22615 23612 22186 23177 22204 22788 21895 22820 22130 23335 22705 23268 22685 23025 22176 22894 22016 22944 21785 22862 22171 23308 22496 23622 22295 23526 22188 23000 22226 22735 21997 22796 22067 22828 22288 23277 16811 20472 20983 21479 21208 21832 20865 21899 21102 21991 25387 24452 23158 24071 22708 23860 22284 23310 22424 23029 22103 22828 22102 23244 22618 23420 22796 23268 22705 23036 22541 23052 22244 22980 22006 22656 22126 22999 22253 23120 22453 23589 22584 23705 22409 23659 22197 23465 22150 23169 22110 22811 21910 22965 22166 22992 22211 23275 22567 23368 22668 23173 22768 22962 22704 22984 22309 22808 22519 22824 22296 22861 22100 22824 21996 22641 22090 22753 22247 22848 22231 22779 22299 23086 22648 23361 22778 23495 22548 23488 22338 23124 22218 22870 22402 22637 22358 22731 22230 22644 22141 22600 21769 22540 21733 22770 21846 22727 22439 23136 22624 23242 23078 23128 22784 23408 23364 23469 23704 23586 23730 23403 23864 23113 23845 22571 23420 22430 22714 22327 22457 22664 21932 22369 21542 22170 21347 21788 21376 21876 21845 22112 21641 21800 21590 21954 21592 21850 21719 21975 21670 22096 22109 22345 22474 22573 22312 22776 22856 22120 22294 22484 22535 22459 22468 22873 23089 23396 23253 23483 23011 23143 23177 22896 23104 23012 23263 22912 23104 23012 23077 23045 23116 23060 23022 23050 22904 22917 23026 22877 23018 23064 20759 21673 22048 22160 22227 22432 22389 22400 22649 26775 24391 23453 23354 23050 23386 22954 23384 23008 23333 22939 23232 22860 23147 22805 23084 22896 23266 22810 23168 22878 23128 22848 23152 22938 23191 22887 23225 22875 23264 22763 23136 22720 23088 22678 23153 22776 23079 22871 23131 22812 23192 22793 23217 22732 23240 22509 23351 22616 23356 22656 23362 22592 23253 22632 23302 22561 23383 22348 23335 22471 23302 22340 23282 22404 23336 22600 23329 22581 23380 22547 23271 22508 23353 22302 23085 21968 22988 21968 23016 21882 22917 21929 22933 21960 23080 21923 22897 21809 22926 21944 22797 21842 22650 21800 22711 22184 22727 22182 22759 22144 22720 22421 23025 22197 22966 22102 22978 22020 23319 22039 23470 22231 23464 22283 23528 22245 23534 22293 23624 22324 23512 22348 23522 22464 23392 22512 23431 22569 23423 22580 23305 22499 23272 22632 23296 22631 23394 22573 23225 22605 23200 22617 23383 22605 23129 22609 23245 22484 23050 22472 22852 22402 22768 22144 22550 22017 22603 22054 22602 21927 22669 21968 22608 22071 22701 22072 22574 22060 22825 22695 22619 23150 22562 23328 22754 23680 23147 23688 23623 23496 23440 20893 21836 21543 22202 21612 21685 21460 21739 21316 21348 22408 21937 21756 21633 21876 21740 22086 22823 22122 23399 22349 23924 22689 24172 22770 24133 23104 24099 23162 23660 22636 22664 22542 22260 22144 22315 22217 22449 22248 22329 22642 22566 22417 22165 22588 22027 22615 22112 22746 21975 22630 22069 22530 22144 22610 22361 22617 22423 22806 22471 22986 22447 23243 22534 23228 22536 23296 22528 23328 22680 23338 22639 22921 22447 22565 22183 22556 22067 22558 22113 22753 22057 22807 22071 22843 22098 22670 22267 22967 22538 22813 22475 22976 22807 22899 22748 23011 22721 23095 22894 23268 22580 23270 22445 23120 22267 23040 22336 23022 22184 23021 22121 22821 21921 22820 21892 22820 21923 22754 21933 22678 21942 22706 21977 22723 22154 22807 22125 22752 21992 22989 22144 23132 21993 23452 22051 23517 22191 23585 22341 23547 22531 23456 22456 23447 22466 23492 22439 23273 22452 22696 22022 22610 21830 22824 21927 22912 21811 23106 21986 22956 21943 23480 22035 22996 22251 23487 22389 22931 22329 22892 22582 23148 22672 23030 22519 23205 22790 23118 22622 23147 22695 23399 22688 23148 22359 23094 22382 22991 22377 23142 22193 23077 22218 23173 22152 23014 21952 23063 22089 22809 21940 22810 21912 22681 21925 22728 21982 22758 22001 22776 22122 22999 22721 22986 22171 23256 22353 23309 22380 23480 22530 23493 22438 23408 22616 23271 22736 23159 22301 22679 22143 22665 21977 22917 22080 22225 22355 22828 22789 23007 22807 23050 22989 23161 22814 23011 22201 22781 22061 22523 21928 22566 22192 23047 22260 23146 22314 23456 22556 23576 22615 23392 22589 22574 22048 21913 21542 22332 21817 22160 23087 22737 23755 23377 23472 23137 22267 22115 21536 21645 22118 22855 22150 23845 22536 24120 23121 22537 21733 21988 21785 22272 23362 22937 23810 23324 22226 22007 21528 21749 22016 23958 23081 23362 22167 21738 21316 22278 23864 23453 22478 21712 22055 22531 22225 24156 23174 22236 21353 22163 23417 23220 23277 22652 21522 21533 22359 23701 23177 23221 22361 21897 22702 22453 23292 22753 22721 22096 22811 22597 23009 22944 22982 22117 22664 22618 23385 22614 22521 22228 22680 22842 22989 22720 22656 22255 22817 22400 23285 22692 22463 22368 22731 22946 23032 22120 22759 22312 23377 22530 22520 22112 22834 22803 23132 22053 22689 22244 23509 22501 22638 22725 23040 22652 22736 22105 23400 22637 22672 22125 22924 22780 22921 21963 23161 22412 23065 21990 22850 22822 23130 21830 22860 22456 22915 21879 22921 22644 23062 14627 18308 18552 19869 18913 19623 20024 20644 19305 35451 26908 25202 23216 23872 23274 23420 22460 23887 22618 22986 22352 23383 22564 22896 22314 23640 22071 18205 19629 21080 19715 21063 20602 21696 20407 21460 31440 26545 23865 24582 23084 23307 22794 23751 22202 23255 22574 23287 22132 23296 22564 22891 22359 13361 18465 20880 21113 21532 21041 22616 21297 22442 21953 27853 24206 24233 22659 23325 23000 23268 22185 23810 22365 23312 22757 23145 22334 23784 21971 23100 17669 20836 21047 22322 21312 22714 21420 22900 22103 22416 25335 23949 22796 23830 22228 23082 22808 22724 22664 22737 22772 23207 22337 23467 22176 22906 22544 20954 21781 22320 22389 22872 21884 23263 21888 22592 22576 23494 22594 23167 22144 23175 21990 23389 22391 23189 22962 22640 22471 22326 22679 23153 22213 23926 21782 22806 22439 22339 22940 21964 23680 22182 21981 23654 21243 23056 21575 23395 23179 22160 23815 22094 21948 23821 21215 22812 21633 23302 22993 22272 23936 21897 22096 23245 21547 23444 21559 23549 22465 22466 23735 21492 22483 22096 22663 23485 21728 24217 21699 22313 23408 21672 23004 21831 23083 22535 22194 23923 21421 22357 22737 21872 23025 22003 23104 22865 22488 22883 22637 22292 23172 22299 23297 22253 23427 22177 22706 22673 22524 22621 22401 22712 23022 22414 23212 22248 22699 22904 22449 22677 22439 22820 22837 22317 23169 22102 22919 22047 23104 22712 22775 22857 22614 22282 23232 22293 23154 22119 23475 22273 22807 22816 22578 22368 22635 22530 23157 22096 23471 22264 22840 22675 22822 22499 22688 22633 23022 22185 23366 21947 23080 22112 23168 22528 22771 22740 23014 21624 23329 21888 23072 22151 23146 22344 22775 22650 23151 22185 23435 21952 22963 22407 22731 22048 23206 22066 23375 21840 23406 22295 23079 22710 22981 22493 23418 21924 22828 22551 22632 22357 23152 22086 23303 21828 23258 22465 22796 22623 23213 21952 23448 22324 22969 22616 23106 21859 23479 22136 23079 22586 22703 22065 23235 21848 23029 22261 22671 22190 23096 21923 22958 22284 22647 22319 23066 22117 23361 21953 23089 22329 22861 22048 23241 22020 22725 22232 23137 21882 23170 22004 22890 22282 23051 21994 23228 22253 22880 22424 23022 21859 22996 22653 22664 22125 23225 21952 22808 22772 22944 22061 23232 22556 22647 22261 23104 22413 22644 22298 23356 22128 22792 22846 22752 22324 23405 22447 22722 22641 23249 22012 22751 22441 23151 21926 22861 22921 22944 22240 23354 22634 22156 22407 23265 22192 21926 22247 24001 21791 22419 23694 22802 21864 23336 23149 22377 21221 22375 23787 22299 21871 23395 23049 21990 21704 22549 23640 22297 21916 23175 22996 22612 21186 21783 23856 23428 21575 21603 22093 24205 21798 22285 23168 23232 22785 21590 22221 23673 23239 22030 21460 22288 24071 23215 21751 21430 22103 24148 22720 21646 22572 22511 23334 22587 22432 22193 22835 22893 23004 22200 23068 22537 23209 22388 22510 22303 22798 23134 22765 22221 22891 22446 23290 22640 22378 22440 22742 22864 22954 22098 22716 22325 23351 22660 22494 22055 22761 22902 23207 22359 22529 22314 23285 22729 22908 22197 8693 16658 18712 19149 19550 18832 19859 19336 20812 19879 30865 25321 24741 23808 24139 22839 17462 19334 20891 20417 21746 20956 21188 20580 21550 31831 26161 23751 23621 22824 24034 17792 21431 20796 21683 21006 22257 21864 22748 21458 22151 24656 24507 22962 24097 22808 18112 20368 21920 21916 22755 21981 22405 21520 22409 21792 25976 23525 23493 22375 23001 22448 22133 22272 23015 22036 22532 21847 23064 22008 23407 24262 23361 22112 23083 22556 23319 22817 23405 21936 23013 22189 23584 22557 23050 22050 22848 22178 23021 22830 23378 22260 22768 22201 23291 22189 23584 22439 22944 21797 22840 22418 23194 22772 23242 22044 22648 22115 23477 22486 22987 21970 22924 22308 22972 22836 23164 22041 22598 22161 23134 22364 23408 22589 22729 22039 22806 22710 23254 22419 22745 22258 23046 22329 23461 22689 22748 21888 23013 22612 22937 22922 22744 22151 22709 22299 23449 22613 22862 21861 22144 22915 23136 22726 22649 21804 22629 22380 23827 22185 21798 21848 22560 23758 23436 22286 21813 21913 22532 22161 24140 22992 22371 21383 22413 23323 23248 23339 22785 21612 21673 22184 23554 22800 23675 
21709 21197 22033 21331 22144 21835 21981 21936 21766 21440 22135 21280 22377 21080 22703 21421 21454 22058 21701 21534 21948 21623 22293 21165 22531 21554 21959 21924 21748 21430 21829 21781 22232 21304 22528 21361 21792 21927 21424 20469 20764 21809 23063 21465 22490 21392 20540 21442 22190 22590 21575 21804 21349 21585 21450 22177 22050 21942 21526 21581 21352 22148 21865 22261 21690 21832 21305 21923 22215 21973 21786 21753 21481 21655 21521 22155 21311 21601 20999 21436 21673 22037 21896 21627 21012 21501 21357 22405 21429 22149 21276 21529 21072 21719 21417 21905 22006 21850 21648 21831 20996 21591 21383 22380 21597 22389 21224 21751 21063 22000 21632 22158 21911 21968 21361 21843 21351 22200 21798 22535 21362 22032 21308 21745 21232 22247 22032 22192 21876 22134 21207 21912 21689 22662 21709 22647 21625 21888 21235 22192 21940 22357 21952 21610 21330 21901 21784 22583 21683 22249 21484 21844 21408 22395 22132 22264 21975 22189 21260 21997 21521 22518 21728 22709 21496 22155 21283 22144 21504 22360 21988 22087 21660 22119 21165 21864 21705 22528 21813 22355 21618 21889 21293 22211 13324 14055 14488 15817 15155 16598 16192 17120 16329 17644 26977 25661 24768 24684 23908 24177 23404 23288 22733 22883 21909 22407 21996 22958 22078 22872 21863 22183 21520 22000 21585 22377 22115 22489 22311 22212 21595 21660 21633 22497 22007 22740 21617 22210 21627 21751 21451 22119 21955 22163 21870 21939 21211 21716 21666 21875 21591 22170 21171 21549 20835 21016 21410 22049 22567 21633 21574 21283 20401 20592 21210 22251 21894 22871 21458 22287 20384 20695 20498 21098 21370 22584 23248 21829 22761 21445 21172 21069 20845 21632 22375 23248 21760 22466 21321 20762 20848 21694 22249 22496 23124 21714 21927 21485 20564 20875 21444 22308 22377 23293 21731 22347 21168 21116 21036 20660 20681 21658 22243 22149 22784 21129 21658 20986 21427 21368 21771 21760 21890 21783 21815 21291 21651 21489 22036 21936 22571 21837 22369 21859 21740 21570 22008 21876 22250 22370 22235 22331 22043 21755 22103 21364 21729 21836 22413 22005 22735 21733 22317 21617 21768 21308 22247 21972 22240 22372 22094 21901 21968 21479 21893 21367 21952 21845 22480 21587 22284 21225 21687 21040 21463 21015 21975 21697 22151 21925 22041 21579 22018 21188 21956 14182 17508 17852 19223 18609 19601 18861 19505 18999 19162 25024 24341 23612 24904 23991 23598 22872 23545 22299 22854 21629 22461 21665 22473 21909 23054 22048 22924 21691 22428 21514 22073 21504 22090 21472 22297 21984 22521 22215 22439 22239 22247 21831 22787 21539 21941 21492 22318 22033 22720 21740 22784 21705 22544 21552 21954 21383 22113 21514 22475 22184 22423 21977 22188 21627 22016 21188 21844 21194 22024 21913 22674 21715 22777 21653 22099 21680 21912 21396 22004 21664 22454 22040 22423 21969 22292 21727 22439 21242 22000 21152 21966 21477 22539 21878 22615 21518 22723 21472 22039 21314 21827 21249 22079 21625 22333 21949 22363 22154 22311 22158 22152 21948 21424 21555 21938 21262 21719 21376 22351 21883 22592 21760 22528 21562 22215 21621 21819 21376 21891 21463 21977 21945 22358 22215 22208 22050 22513 21499 21935 21414 21854 21719 22037 21736 22428 22055 22800 21797 22600 21687 22119 21376 21560 21039 21817 21834 22448 22914 22249 22909 21627 21276 21370 20912 21416 21787 22690 22475 23308 21595 22663 21433 22487 21443 20792 20889 21146 21363 22199 22580 22431 23168 21681 22426 21419 21205 21368 20577 21321 20662 21132 16247 18276 19175 20341 19588 20769 19225 19313 19190 18970 23669 22754 22401 22840 23179 23040 23585 22402 22986 21789 21909 21700 20792 21072 21285 21674 21896 22609 22640 23222 22185 22329 22027 21837 21431 21468 21955 21269 21750 21307 21770 21671 22061 21795 22364 21988 22567 22068 22496 21696 22187 22042 21606 21600 21613 21431 21589 21255 21760 21504 22045 21893 22093 22100 22077 21992 21926 22016 21879 21967 21930 21728 21823 21410 21760 21149 21670 21096 21431 21015 21478 20948 21453 21047 21690 21419 21952 21601 22237 21520 22339 21450 22357 21108 22088 21236 22222 21319 22235 21268 21889 21398 21712 21100 21399 21063 21543 21024 21564 21116 21645 21241 21888 21015 21826 21129 22010 21271 22048 21544 22193 21575 22159 21862 22135 21750 22164 21860 21956 21924 22019 21664 21911 21533 21861 21309 21636 20949 21691 20979 21524 21043 21708 21091 21677 21108 21696 21067 21777 20962 21704 20960 21609 21032 21680 21111 21687 21232 21908 21177 21817 21335 21747 21265 21784 21269 21990 21507 22155 21799 22487 21734 22056 21652 22375 21751 22420 21739 22513 21776 22383 21712 22634 21737 22597 21625 22515 21639 22145 21455 22257 18009 19867 19848 20901 20395 21287 20625 21335 20749 21069 22953 22964 22224 22656 22071 22519 21948 22211 21832 22080 21786 22266 21748 22125 21748 22263 21782 22159 21787 22191 21654 22180 21771 22164 21838 22279 21849 22256 21904 22460 21853 22474 21849 22326 21932 22491 21976 22386 21917 22537 22125 22562 22092 22558 22085 21440 21293 21262 21378 21265 21417 21327 21194 21176 21158 21157 21033 21018 20739 20955 20725 20944 20774 20973 20770 21101 21197 21211 20871 21229 20889 21078 20835 21175 20530 20880 20631 21216 20587 21126 20640 21265 20572 21187 20637 21075 20519 21190 20746 21177 20677 21607 21312 21655 21422 21485 22192 21554 22248 21295 22743 21616 22464 21655 22404 21552 22522 21644 22437 21698 22562 21891 22205 21849 22279 22016 22278 22020 22286 21862 22119 21920 22183 22016 22055 21687 21850 21700 21896 21616 21844 21575 21845 21595 21739 21474 21907 21505 21878 21605 21893 21467 21681 21524 21721 21419 21760 21351 21841 21208 21753 21303 21836 21208 21834 21303 22006 21273 22025 21290 22091 21442 21513 21625 22071 21697 22119 21735 22007 21895 22135 22007 22232 21921 22336 21958 22403 21805 22389 21555 22145 21408 20439 19841 20962 20277 21079 20585 21207 20681 21291 22809 22644 22119 22132 21853 22200 21040 22344 21540 22609 21700 22608 21706 22615 21762 22558 21729 22466 21624 22299 21442 21901 21244 21825 21169 21755 21192 21738 21199 21737 21184 21808 21193 21765 21260 21954 21127 21912 21049 21786 21103 22011 21167 22086 21182 21782 21540 21948 21760 22038 21959 22221 22082 22235 21952 22226 21907 22263 21900 22181 21788 22112 21303 21687 21073 21533 21191 21569 21396 21779 21571 21849 21853 22018 21428 22134 21340 22233 21384 22359 21592 22330 21669 22319 21754 22484 21728 22403 21740 22297 21830 21909 21400 21579 21267 21594 21249 21527 21219 21581 21061 21380 21051 21528 21093 21453 20994 21298 21206 21469 21395 21626 21476 22057 21432 21928 21971 21405 22195 21338 22322 21486 22655 21484 22975 22295 23067 22441 22583 22390 22117 22068 21991 21849 21478 21939 21577 21508 21124 20868 20608 20696 21101 21136 21337 21616 21150 21991 21159 22714 21423 22759 21491 23031 21591 22956 21802 23084 21947 23235 22752 23856 22706 23544 22222 22976 22295 22833 22380 23229 22572 22632 21753 21595 21637 21135 21658 21271 21790 21960 21684 21144 21590 21035 21577 21413 21577 21699 21859 21442 21614 21621 21848 21617 21660 21524 22094 22045 21895 21511 21997 21481 22173 21511 22343 21473 22341 21713 22256 22446 22720 22217 22472 22033 22414 21696 22212 21701 22076 21253 21876 21323 21847 21415 21616 21909 22093 21752 22310 22087 22006 21821 21986 21720 22024 22115 22291 20923 21400 21037 21582 21614 22343 21710 22396 21831 22699 21966 22363 22001 22614 21888 22509 21184 21928 21226 21907 21387 22128 21636 22137 21703 21975 21896 22227 21553 22079 21193 21705 21007 21980 21267 22312 21302 22593 21551 22528 21569 21957 21069 21657 21097 21845 21973 22149 21966 22185 21303 21644 21260 21846 21277 22478 21689 22345 21351 21792 21196 22024 21915 22291 21497 21923 21377 22297 21521 22652 21623 21821 20901 22056 21623 22274 21559 21904 21035 21741 21277 22426 21613 22298 21317 21733 21205 21965 22019 22209 21290 21504 21336 22208 21440 22297 21399 21684 21151 22005 21735 22185 21031 21773 21288 22554 21600 22184 20923 21682 21815 21943 21943 22050 21035 21691 21438 22439 21393 21568 21140 21842 22025 22124 21206 21648 21365 22281 21501 21367 20992 21601 21797 21751 20892 21689 21377 21872 20897 21460 21469 21867 20881 21300 21221 22224 21284 21349 21319 21799 21441 21313 21005 22484 21773 21584 21341 21826 21366 21389 21540 22455 21760 21220 10241 13429 14412 14438 14957 17071 16433 15387 15890 31922 28756 25665 24952 25863 23034 22918 23872 23616 21789 22208 22198 22974 20843 21861 23227 21466 9512 15941 16483 18219 18378 19383 20152 18637 19104 21228 25255 23047 23552 23310 21225 22485 22448 21244 20727 21836 21760 20458 21304 22388 20385 21248 22748 17317 18963 20957 19111 19677 21635 20160 20381 20867 20679 23006 23784 26237 24359 23733 23664 22384 23164 22493 22279 22102 22201 21492 22581 21312 21434 21959 19215 19719 20867 19997 20624 20506 20745 20712 20648 20921 22832 21449 22325 21476 21739 21938 21568 21426 22263 22080 22859 21664 22776 21956 22231 22294 21776 20112 21140 20249 21382 20442 21473 20806 21137 21280 22659 21494 23165 22185 22811 22322 22609 22137 22093 22400 22252 21636 22545 21305 22433 21340 22472 21797 22087 22118 21920 21607 22319 21682 22340 21368 22696 21336 22130 21765 21904 21627 21867 21699 22476 21274 22715 21397 22141 21879 21803 21763 21757 21835 22409 21408 22560 21288 22022 21689 21991 21673 21953 21895 22182 21143 22629 21123 22241 21351 22383 21560 21975 21949 22003 21448 22416 21179 22242 21114 22485 21492 21954 22019 21811 21483 22390 21262 22281 21384 22019 21784 21821 22000 21810 21511 21856 21798 22273 21276 22728 21120 22025 21715 22069 21633 21787 21685 22400 21279 22565 21336 22024 21388 22105 21821 21789 22064 21857 21405 22326 21309 22152 21332 22359 21775 22124 22093 21627 21594 21705 21626 22171 21398 22539 21436 22156 21908 21725 21723 21786 21706 22168 21489 22480 21169 21973 21460 22095 21876 21709 22108 21857 21528 22285 21227 22119 21070 22132 21814 21473 22551 21326 21511 22212 20970 22257 20692 22307 22160 21107 22973 21733 21142 23259 20776 21474 22704 20776 21649 21336 21543 22444 20771 22760 21954 21271 23040 21527 21463 23296 20844 21477 22606 20672 21867 21079 21568 22528 20763 22331 22393 20912 22353 22417 20936 22625 22336 20910 22828 22088 21076 23255 20854 21388 22917 20796 21575 22548 20433 21675 22502 20908 21699 21940 21473 21397 22442 21162 22188 21537 21780 21632 22024 21383 21966 21955 21511 21650 22409 21341 21922 21730 21588 21613 22006 21300 21813 21895 21627 21580 22352 21352 21937 22136 21677 21617 22551 21410 21847 22038 22193 21352 22223 21871 21944 21321 21997 21847 21618 21433 22467 21495 21975 22016 21875 21381 22465 21737 21751 21689 22288 21464 21841 21542 22461 21285 21904 21975 22083 21183 22369 21659 21761 21399 21633 21512 21579 21078 22315 21095 21415 21385 21931 20741 21789 21113 21958 20601 21575 21632 21973 20759 21847 21161 21848 20733 21513 21605 21849 20768 21776 21264 21913 20791 21696 21563 22024 21002 21380 21065 22218 21384 22185 21385 22145 21344 21616 20806 22102 21408 21744 20727 21726 21605 21960 20817 21449 20804 22313 21437 21528 21173 21895 21927 21969 21162 21751 21524 22528 21518 21655 21640 22279 21992 22128 21338 22153 21599 22127 21112 21378 21063 21746 21638 21875 20711 21601 21179 22226 21240 21335 21112 21751 21645 21888 20888 21568 21236 22384 21702 21850 21098 22062 21828 22118 21575 21564 21257 14436 14509 16691 16639 17212 18505 18994 18969 19163 18281 27073 26055 26034 24307 23902 22576 17741 18485 19212 19679 19785 18809 19500 19616 21110 25659 26420 24424 24695 24730 23920 15763 16751 17601 18999 18979 21265 20407 19297 18721 28162 26712 25155 24804 23408 21940 16711 18319 20928 20535 20376 19445 20208 20560 20776 22208 25708 23349 22215 22538 23344 19728 21668 20992 20456 19975 21049 22268 21985 22289 21476 22784 22166 21833 23642 22795 23081 21870 21317 21857 22019 23515 22538 21638 21453 21991 21983 22153 22360 22481 21610 21855 22144 22509 21927 22552 21922 21838 21341 22155 22326 22237 22200 22115 21511 21688 21728 22519 22112 21911 21440 21911 21908 22128 22183 22256 21519 21735 21407 22519 21837 22597 21765 21768 21385 22035 22128 22464 21861 21803 21095 21832 21446 22384 21564 21696 21008 22104 21773 22096 21851 21817 21171 21994 21443 22509 21619 21672 21061 21974 21925 22147 21846 21727 21201 21911 21412 22650 21371 21750 21266 21925 22000 22344 21249 21700 21319 22235 21299 22688 21616 21920 20961 22130 21591 22283 21773 22008 21089 21767 21555 22459 21614 22345 21381 
20857 21200 22885 20408 22052 20997 22162 22074 21468 22832 20867 21373 21463 21229 22586 20970 22796 21787 21189 22761 20770 21966 21399 21381 22711 20865 22640 21785 20805 22574 20853 22373 20896 21996 22265 21618 21966 21715 21446 22052 21367 21883 21460 21947 21839 21714 22048 21516 21564 21954 21568 21931 21420 22080 21602 21632 21970 21431 21850 21485 21794 21811 21773 22192 21289 21680 21568 21579 21915 21547 21953 21905 21518 22148 21319 22102 21703 21792 21217 21661 21575 22231 21612 22103 20752 21504 21318 22183 21957 21937 21637 22021 21217 21487 21464 22036 21829 22272 21408 21987 21369 21547 21293 22139 21960 21984 21686 21786 21201 21565 21494 22120 21749 22190 21339 21729 21133 21840 21818 22189 22395 21568 21220 21621 20835 21293 22209 23057 21554 21818 21258 20689 21239 22565 22839 22038 21712 21505 20530 21069 21796 22959 21742 22223 21209 20694 21383 22633 22797 21589 21104 21289 20763 21635 22426 23075 22063 22448 21294 20751 20928 21800 22450 22393 22692 21255 20624 21147 20856 21732 22432 23051 21396 21539 21174 20704 21029 21948 22176 21592 21792 21560 21409 21440 15335 18137 18989 19341 19856 19408 19937 20317 20668 31431 25596 23468 22416 22080 22217 22276 22184 22104 21812 21904 21708 21357 21426 21836 22119 21839 22100 21493 21551 21382 21525 21376 21862 21943 21980 21895 21660 21316 21561 21650 22216 21703 22240 21511 21712 21516 21579 21445 22115 21933 21949 21619 21912 21267 21785 21568 22151 21760 22144 21403 21628 21306 21877 21774 22153 21980 21754 21393 21764 21266 21611 21584 21925 21799 22381 21432 22069 21532 21542 21212 21707 21597 22217 21843 21913 21689 21664 21250 21572 21420 22144 21824 22288 21405 21880 21417 21632 21383 22041 21856 22090 21840 21843 21379 21923 21136 21792 21527 22283 21705 22327 21352 21820 21414 21722 21248 21720 21437 22103 21891 22056 21709 21700 21299 21693 21498 21725 21721 22379 21576 22120 21283 21584 21197 21817 21589 22256 21806 21765 21392 21992 21201 21724 21328 21851 21633 22325 21565 22257 21366 21779 21427 21613 21473 22211 21769 22151 21891 21797 21399 21720 21189 21703 21721 22242 21755 22231 21559 22032 21453 21601 21356 21728 21660 22226 21988 21936 21672 21842 21264 21957 21287 21761 21827 22155 21879 22319 21384 21908 21620 21496 12998 18231 19229 20627 20903 20870 21080 20727 20293 20678 25473 23532 22998 23169 22453 23110 21636 22326 21411 21940 21248 20758 20983 20856 21209 22370 22537 22493 22674 21342 21786 21477 20725 21355 20530 21220 21373 21868 22282 22930 22244 23077 21616 22321 21173 20860 20969 21201 21423 22355 22671 22661 22884 21616 21682 21103 20669 21290 20916 21600 22338 23003 22091 22644 21232 21411 21360 20726 21121 21042 21253 22252 22162 21955 22137 21521 21696 21632 21347 21348 21569 21758 22057 22119 21997 22055 21760 21753 21622 21448 21604 21350 21433 21812 22094 22008 22165 21703 21975 21520 21469 21600 21360 21431 21547 21434 21843 21837 22039 21965 21997 22009 21671 21785 21595 21448 21857 21323 21689 21617 22016 21915 22203 21740 22098 21541 21805 21587 21451 21310 21465 21339 21866 21865 22187 21961 21883 21594 21711 21293 21808 21309 21623 21392 21621 21664 22045 21780 22359 21525 22137 21354 21639 21548 21643 21200 21973 21801 22123 21961 21955 21764 21807 21304 21735 21379 21729 21690 22208 21729 22264 21551 22224 21336 21910 21441 21565 21216 21730 21526 22121 21959 22037 21909 21821 21608 21767 21319 21635 21296 21708 21262 18129 19832 20970 20984 21688 20911 21633 20858 21287 26983 23738 22325 22152 21619 22212 21913 22266 21885 21929 21688 21831 21338 21926 21152 21739 21346 21824 21672 22270 21817 22325 21656 22230 21504 22022 21465 21706 21368 21600 21344 21644 21152 21831 21348 22049 21609 22185 21848 22132 21732 21892 21485 21928 21181 21931 21230 21815 21222 21709 21383 21782 21740 22243 21762 22309 21751 22336 21722 22291 21597 22293 21519 22204 21428 21944 21361 21697 21508 21618 21563 21620 21570 21584 21398 21504 21275 21840 21509 22001 21824 22155 21985 22067 21829 21810 21814 21985 21809 21830 21824 21769 21724 21812 21436 21712 21060 21693 20960 21426 20802 21253 20901 21131 20729 21140 20839 21232 21108 21447 21234 21479 21517 21957 22106 22497 22444 22888 22395 23111 22199 23139 21968 22778 21461 22693 21336 22077 21422 21412 20942 20940 21239 21186 21152 21080 21360 21155 21186 21050 21077 21056 21309 20835 21193 20647 21159 20717 20999 20647 21109 20750 21170 20712 21069 20720 21075 20771 20971 21202 21276 21753 21475 21621 21591 21619 21655 21703 21703 21656 21624 21627 21792 21856 21881 21913 21799 21879 21692 21473 21538 21625 17761 20284 20891 21339 21533 21491 21576 21623 21634 21394 23904 22595 22156 21744 21815 21600 21687 21518 21556 21522 21580 21600 21696 21670 21763 21689 21673 21701 21828 21706 21792 21727 21816 21723 21751 21639 21764 21652 21768 21688 21836 21681 21972 21722 22048 21730 21949 21620 21920 21707 21950 21639 21904 21657 21901 21327 21624 21308 21668 21353 21626 21295 21637 21255 21586 21156 21597 21148 21677 21194 21716 21199 21633 21200 21668 21268 21698 21287 21646 21354 21649 21215 21649 21191 21752 21171 21852 21238 21719 21260 22065 21157 22022 21144 21960 21120 22001 21220 22064 21253 22070 21476 21862 21615 21830 21800 21831 21814 21845 21913 21965 22017 21975 22006 22106 22007 22063 21952 22214 21903 22216 21768 22080 21536 22137 21576 22108 21493 22070 21345 22052 21297 22055 21552 21837 21191 21681 21337 21609 21240 21647 21296 21711 21256 21669 21225 21655 21238 21737 21288 21605 21184 21605 21153 21585 21326 21573 21181 21596 21413 21553 21345 21546 21594 21659 21445 21828 21440 21716 21398 21986 21411 22048 21465 22249 21496 22401 21649 22720 21816 22875 22153 22855 22295 22631 22191 22232 21752 21441 20904 21184 20687 20384 20151 21208 20416 21340 20728 21414 20873 20745 23268 21888 21832 21413 22085 21602 22157 21867 22903 22593 22672 22704 22321 22454 21849 22259 21664 21704 21186 21630 21008 20743 21096 20715 21355 20744 21058 20789 21263 20800 21133 20789 21512 21496 21740 21286 21625 21482 21711 21480 21077 21603 21644 21656 21560 21719 21616 21916 21738 22135 21848 22161 21990 22052 22009 21989 21988 21825 21936 21646 21831 21600 21404 21536 21469 21552 21619 21444 21697 21484 21799 21495 21946 21489 22020 21568 22195 21655 22163 21769 22252 21848 22256 21889 22157 21896 22093 21882 22006 21735 21809 21288 21543 21207 21731 21241 21735 21176 21728 21211 21868 21260 21809 21358 21657 21396 21581 21389 21731 21510 21774 21479 21801 21650 21756 21698 21848 21767 21868 21673 21976 21812 21984 21775 22181 21880 22226 21845 22144 21584 22004 21600 21831 21458 21834 21480 21735 21272 21751 21303 21634 21357 21839 21469 21966 21324 22149 21277 22264 21469 22245 21469 22346 21611 22352 21585 22263 21608 22321 21741 22336 21768 22250 21717 22310 21812 22226 21780 22028 21644 21943 21586 21803 21351 21597 21252 21765 21249 21756 21221 21763 21175 21682 21292 21760 21165 21773 21117 21927 21094 21691 21348 21763 21371 21768 21543 21845 21520 21876 21733 21786 21762 21932 21856 22001 21963 22168 21899 22154 21703 22195 21415 21874 21413 21906 21409 21750 21152 21553 21280 21632 21582 21684 21467 22086 21523 22186 21632 22279 21754 22357 21873 22037 21655 21754 21440 21686 21200 21893 21315 21840 21512 21688 21818 21841 22069 22165 22033 22144 21730 22048 21445 21943 20968 21260 21328 21418 21345 22164 21506 22832 22144 22840 22192 21959 21500 21294 20594 21415 20935 21365 22341 21901 22902 22627 22237 22220 21169 20848 21273 21229 20967 22958 22436 22636 21871 21226 20555 21531 21048 21429 22680 22609 21766 21331 21001 21001 21135 22616 22528 21964 20796 21445 21667 21949 22821 22543 21135 20768 21233 21944 22166 22485 21149 21111 20683 21385 22672 22578 22187 21382 21031 20784 21568 22401 22016 21548 21415 21639 21908 21690 22180 21780 21472 21436 21571 22020 21959 21459 21424 21483 21993 21929 21973 21520 21681 21568 21626 22122 22013 21500 21419 21589 22189 21808 21440 21304 21645 22026 22113 21492 21538 21488 22186 21931 21706 21306 21719 22019 22280 21386 21539 21580 22121 21452 21594 21644 22072 21648 21495 21536 22225 21803 21584 21376 21817 21956 21708 21421 21960 21783 21640 21195 21768 22007 21738 21548 22109 21844 21632 21316 17419 19358 19914 19687 20533 20449 20620 20002 20667 28395 24589 22595 23079 22192 21982 21665 22164 21686 21624 21395 22339 21454 21712 21846 22082 21207 13417 18645 20115 19726 20672 21047 21190 20571 21345 21046 26474 23552 23090 22103 22082 21722 22372 21307 21833 21872 21815 21069 22329 21595 21933 21735 22176 16122 19854 20558 20896 21038 21720 20855 21549 21364 21275 24590 23535 21753 21909 21764 21737 21370 22192 21338 21840 21715 21825 21399 22247 21232 22165 21815 19126 20583 21347 20819 22002 20948 21531 21466 21341 27028 23495 22250 22619 21524 22128 21772 21795 21909 21497 21417 21977 21210 22009 21219 22010 21670 21760 20921 21357 21184 21786 21216 21960 21068 21831 21726 23637 22515 22132 21335 22325 21242 21914 21447 21745 21827 21762 22073 21782 21392 22038 21225 22156 20844 22407 21744 21484 22694 21237 21665 21293 21669 22608 21090 23111 20960 21398 22145 20731 21850 21328 21700 22596 21207 23040 21431 21351 21947 20850 22058 21188 21892 22411 21371 23116 20817 21404 21687 21304 22385 21258 22449 21718 21164 22627 20490 21994 20975 21988 22348 21425 22765 21201 21168 22432 21214 22636 20934 22477 22079 21377 22917 21026 21561 22157 21419 21613 21540 21704 21929 21449 22082 21257 21892 21452 21888 21905 21692 22020 21632 21589 21978 21318 21821 21481 21745 21884 21565 22105 21413 21646 21672 21547 22011 21465 22151 21639 21675 21844 21504 21787 21452 21696 21969 21511 22225 21299 21824 21389 21815 21876 21753 21976 21804 21470 22064 21182 21841 21380 21757 21821 21803 21948 21577 21483 21799 21461 22131 21355 22165 21463 21753 21960 21526 21482 21744 21417 22225 21608 22324 21496 21787 21840 21603 21402 22029 21352 22148 21336 22034 21815 21782 21799 21930 21213 22317 21201 21774 21638 21703 21602 21696 21499 22136 21259 22101 21854 21789 21844 21920 21316 22298 21196 21837 21613 21541 21452 22023 21216 21993 21408 21692 21554 21925 21308 22070 21292 21768 21767 21754 21802 21995 21362 22354 21464 21866 21960 21948 21464 22273 21580 21991 21828 21936 21433 22407 21188 21770 21910 21770 21343 22321 21434 22454 21853 21885 21419 22415 21259 22040 21872 21842 21325 22414 21441 21880 21982 21822 21481 22125 21673 21771 21673 22152 21284 22061 21761 21632 21308 21880 21755 21617 21352 22292 21541 21870 21836 22028 21292 21914 21784 21586 21461 22099 21460 21654 21507 22200 21212 21789 21972 21884 21376 22216 21817 21488 21366 21996 21469 21354 21353 22768 21395 21525 22538 22467 20992 21648 22179 21369 20844 21765 22584 21150 21122 22841 22492 21144 20985 21872 22500 21213 21074 22925 22106 21138 21072 21830 22613 21424 21329 22390 22285 21751 20532 21338 22649 22699 20881 21446 21906 22613 21155 21367 21586 22295 22025 20768 20544 22769 22484 21318 20571 21039 22312 22573 21024 20720 21293 22447 21955 21316 21431 21476 22245 21969 21492 21303 21767 22016 21737 21429 21594 21456 22228 22023 21447 21466 21660 22197 21936 21534 21484 21538 22225 21786 21499 21431 21603 22096 21996 21427 21479 21489 22145 21879 21852 21365 21703 21657 21988 21741 21648 21456 21714 14320 18808 19436 19797 19862 20264 20800 20841 20468 20405 26034 24039 22877 22522 21659 13958 18152 20064 20752 21156 20505 20855 20711 21504 21133 26717 23285 22743 22401 22439 22071 18872 19813 20800 20777 21720 21359 21563 20769 21584 26267 23818 22822 22549 21556 21750 18786 21070 21000 21879 21012 21440 21135 21507 21799 21931 22999 22248 21888 22052 21647 20527 21136 21316 20929 21736 21389 21943 21803 22055 21205 22741 21462 22311 21691 22400 21545 21728 21272 21907 21867 22216 21614 21573 21377 21809 21463 22359 21852 21775 21189 21669 21689 22044 21925 22128 21210 21512 21613 22043 21531 22392 21618 21712 21127 21326 21624 22196 21465 21632 21406 21873 21399 22341 21817 21696 21162 21476 21600 21971 21945 22082 21296 21536 21664 22273 21752 21981 21390 21717 21559 21868 22016 22089 21300 21569 21281 22055 21648 22253 21659 21682 21431 21843 21910 22181 21405 21546 21304 22023 21766 22304 21467 21443 21174 21671 22533 22377 20845 21204 21288 22949 22190 21669 20661 21479 21708 21735 22875 22670 21311 20823 21104 21860 21626 22528 21360 21037 20659 21304 22452 22424 22500 21538 20968 
36301 39728 37719 41905 39121 37690 40119 39373 42781 37017 36231 41836 42932 40725 34423 37396 36552 36112 39744 36429 35052 38171 41986 41947 36020 36096 34697 35942 35618 34033 36120 42417 36660 38528 41475 34424 38127 35424 42312 39076 41888 37610 42496 38289 36952 35257 38660 33038 33442 37696 33479 37664 42192 39355 34084 34016 37943 42419 37108 43008 36342 36356 35939 40307 40916 34983 33329 33696 37491 33511 37720 37319 33098 39707 41288 37668 41583 37223 36919 35835 39667 42422 33713 37251 41569 39588 41313 39841 36507 34825 38022 33302 42455 39174 41847 38852 42256 36175 36615 36368 38128 37239 41061 40680 39387 37824 42384 36807 36313 34330 37088 37579 35994 40570 41611 35686 39188 36617 36448 40597 42978 33740 39946 34497 35861 40821 40794 39457 33527 36339 40327 34426 40369 34071 37013 38811 35270 32615 32144 38363 36130 38541 35931 41119 40272 34583 41621 35031 36546 33917 38614 40838 35348 34244 42715 39840 39474 43104 41154 35314 36759 36100 42999 42990 35640 40352 33525 39254 36244 35452 42658 39648 41902 33523 39495 34472 37899 37979 40208 34030 35826 33393 41692 42353 39684 38226 37002 40561 36013 40960 37144 41126 34346 46955 46240 44256 42939 39361 40930 41336 40566 39680 36448 37184 35311 41580 42320 36910 39872 37046 39463 43105 33936 41495 33303 41179 37181 37984 38389 37428 34736 40807 33792 34284 40576 35496 40836 33169 34983 32844 33648 42179 39950 38000 38144 34375 37259 40456 36210 33382 39944 35683 39706 42161 34696 40843 37357 36006 40037 38478 35978 41649 35907 40278 34451 33515 37481 36355 42610 42496 39457 33292 33088 39889 35486 34048 40689 36936 37543 35129 34465 40011 33734 41944 39962 36470 41203 42295 37392 42124 34353 41609 39040 36835 39424 36660 36756 41600 37828 39013 36023 33124 41221 35464 41918 41653 36730 42051 35703 39985 35480 42344 39904 37350 38976 35520 35024 40764 35415 42935 35895 35424 42504 33944 39568 40785 33841 39849 36594 33895 40951 36599 35785 41533 38563 39927 35648 40922 37122 34245 41736 33984 41077 41856 36192 42179 34580 42481 40989 36032 40086 37360 36233 41936 35584 39728 35430 35398 40922 36199 41050 33860 38393 42662 34250 41411 35548 34632 40696 38488 37687 34800 36550 40224 38158 40864 35814 36494 40140 37468 42016 41862 37569 34244 42740 34920 38962 39507 33691 36631 36246 38521 35045 40650 34376 44014 44826 39191 40585 43424 40299 34473 41756 42277 38016 40064 35141 37683 36168 40006 42381 33813 43604 35414 41408 36288 42717 35136 41516 32599 39860 41975 37284 41322 38104 41127 39832 34271 41603 39856 36454 37476 39844 42496 42439 35604 34953 37425 34125 34769 39061 34375 40617 36891 33841 41702 39218 39660 35020 40055 42184 41624 35085 38832 38136 40332 41386 40252 38148 40092 33092 34770 33979 41257 41540 33767 35888 39000 39966 38777 39188 35659 35840 34298 42176 34276 41302 42519 36539 39539 38701 40322 35487 38292 32876 42551 34137 41227 42582 33740 42112 36966 36785 38896 38315 38704 38784 35028 35981 34049 42165 37063 41234 35284 34108 38181 37681 40816 35907 39367 33415 36260 33846 42360 41367 42883 41699 37249 37064 40576 38251 37448 33996 35387 40827 36328 41061 34661 41461 34560 34420 38865 35970 42298 33362 39867 41649 34739 33280 34362 39606 38324 36320 39911 38215 38072 35744 36480 40808 35920 41536 35665 35013 40404 35640 41256 33880 40569 41395 37655 42263 33994 39785 35579 32969 39609 38254 38872 37555 36681 34067 35781 41106 34612 40511 35454 40416 38035 35872 37428 37604 35025 36916 34244 36160 40756 40663 36849 41862 40154 34442 40516 37670 41463 37625 37769 35027 36630 41283 37833 39206 35877 41224 36493 34725 41453 36679 41869 34800 40869 32800 38400 42710 35520 41510 34095 41047 34664 39075 36776 41317 39026 34288 40331 36887 39856 35653 37090 42987 37848 39901 37954 40450 36693 40176 35556 41683 36197 35675 41064 35817 41609 36176 41728 35701 41369 34360 41350 33422 40538 42322 38051 41559 35272 32640 33974 33524 34068 33376 33479 41649 32816 40457 36674 32835 38288 36384 40149 38428 39232 36706 36268 36400 38272 36344 36561 36320 35822 35472 36239 42304 35412 38225 35299 37079 42114 35672 40232 36800 39202 35014 39040 36202 40074 39002 42585 40481 43047 33360 37832 39632 43693 43452 37837 42849 40387 40916 40550 38168 36600 42595 35730 41169 39621 42357 42231 37504 37172 40498 39827 39332 38664 41455 39639 39790 38421 38690 38225 41172 36167 39821 34077 39424 34952 37656 33976 38872 35099 39400 34704 38508 34658 38452 35228 37517 39840 40724 36052 42677 34611 33915 34144 34569 35188 35221 34448 34163 34368 35818 36671 37236 37515 36340 37268 35147 42503 33412 34230 33798 40488 36776 41397 33519 42717 33911 34312 34088 41520 38545 34354 39972 35703 36461 33831 34980 32939 33195 32708 33569 33695 34803 34690 35642 35021 34768 35089 36380 35209 35856 35670 36290 35541 35872 34432 35557 34404 35608 34896 36576 34844 38011 35504 38649 35533 37996 34272 37265 35365 37984 34534 37080 34649 37344 41376 34515 40857 34861 41389 34603 40888 34562 40282 33927 39175 34234 39193 35132 39755 35428 40040 34388 39608 34823 40268 35192 40714 34764 41378 34669 40208 34597 39786 35925 39556 37001 40388 35750 40333 39174 39544 38679 39271 38068 38832 38572 40152 39062 40406 39330 42793 37275 34483 36489 36144 36683 36410 36792 37515 38276 38509 38425 38706 39704 38873 39410 37888 40816 37736 40742 35898 39025 33121 39831 33770 39496 43088 39457 41419 39064 40844 39264 33356 36621 39888 35008 41191 34368 40224 34854 40528 35681 40184 34960 40146 34864 40297 35825 40592 34296 39429 34248 39176 33862 41104 33888 39720 34151 41899 33613 41152 33568 33763 34615 42258 36714 42112 35542 41781 38496 42102 38993 42764 41496 43168 42797 34761 35478 36316 37547 40105 37440 41616 35072 40622 41053 35949 42148 36804 39527 34655 41308 39641 40069 41984 41588 35040 41920 36556 34949 41625 37205 36576 42032 39622 34128 40112 37345 37962 34235 34816 35281 41608 43427 37120 41301 34730 35001 39533 34644 37450 34975 38664 34896 41504 34951 38165 35472 40567 35524 39192 35536 32738 42657 35975 40651 34598 42688 35807 42653 38991 34196 34354 34423 33335 35360 34016 37422 35712 40019 36891 40064 38569 38943 38775 38498 38384 36495 37574 34610 36579 33843 41772 33265 42586 33538 34156 42133 35303 42772 36588 43057 38198 42893 38749 33540 40416 34895 40083 36002 41216 36933 41104 37287 40230 37335 39576 37361 38728 35809 36202 40583 33607 39939 35738 40373 35915 39539 35493 40098 37218 40407 36440 41630 34928 41664 34205 41721 35826 32794 35816 42817 36548 34445 35832 35008 36677 35904 37064 34867 38105 36365 38166 36178 40372 37302 40824 36960 39737 33776 38359 33920 36536 42371 36864 42683 35982 40377 36087 40960 34407 41551 37120 42812 38496 41251 40220 40889 41505 43056 41465 43052 42390 34587 41856 34019 41338 34304 41600 36049 41719 35948 41160 35607 41592 36501 40790 36053 38627 34546 37845 33784 36210 41504 34363 40042 35933 40086 36087 40161 35885 39713 35010 40718 35722 39590 36128 39171 37861 38825 35331 41260 35952 41767 35976 33368 36635 32796 36908 35623 36004 35607 37700 36782 38488 38265 40224 37559 40076 35460 40491 42328 37272 42064 37514 41920 36057 39149 33465 40281 34276 33756 34759 42632 39616 33200 40288 34297 41249 36096 42176 37289 38798 34793 35777 42039 35259 39671 37349 41047 36713 32796 34784 36376 36631 39184 40313 38788 39824 35593 38645 42457 38200 37452 40423 41183 42329 41582 40341 32896 36597 39750 37093 40349 38258 43096 41181 33418 41962 37395 41684 42292 37731 37870 34752 41046 41012 39657 36068 40518 40585 37728 38519 42984 35127 37204 40230 33044 33040 37952 42306 35458 34328 35634 41124 37876 37734 39404 34635 33082 37906 35546 42290 35061 38019 36872 33783 39192 35042 40153 37973 40283 43697 39733 39236 34523 41584 35212 33909 40401 41780 38368 35263 33376 42278 38549 33465 41968 34733 37262 35109 40200 36024 42460 42624 33954 38331 38191 42600 42273 43223 38784 37798 38266 32865 34696 33323 34244 39680 38952 43154 42536 34192 40497 36300 42085 41081 34816 38539 39677 42994 33456 42507 40716 37984 35298 40865 35717 38500 41280 41912 33514 33637 39639 42596 34274 34368 39014 34419 42952 33330 40650 36525 33641 41216 36679 37900 35328 42183 38228 36176 34284 39835 35880 38691 35751 33348 39611 36794 34112 40757 30345 40403 36902 34454 32429 42032 33720 37385 34263 45462 35137 34304 39620 40448 38594 34764 40008 35142 34212 41696 42208 42842 35456 36728 39170 40225 29336 32803 38656 34765 33888 38186 39821 33254 41122 38400 45197 34640 39602 39752 39340 35612 42214 41319 36864 36941 36508 38656 42016 34311 37745 35783 40064 38096 36230 32871 36224 38203 35406 36253 33483 41351 40871 34955 44582 36232 37431 35716 35618 41636 40581 41478 36754 35382 36356 41943 41512 40354 40387 36680 38326 33344 41206 35968 38447 37201 33274 42413 41735 40893 44288 41574 34956 32857 39522 35993 36128 37415 43033 42432 38516 40137 38840 40242 38844 34891 35444 36866 41621 39756 36164 39906 38112 38529 36785 35615 35478 43818 40138 41561 42095 40665 37696 42520 35953 36513 35621 39200 36080 41553 38971 40353 40268 36265 42726 35816 42816 35704 40320 34848 40771 35025 34168 38523 40180 37296 41881 40057 35180 36802 40951 35316 34112 39981 39106 42449 41846 38225 36151 39034 39765 37303 42779 42085 40330 35792 41906 35344 40786 42662 40617 43287 35671 39491 34816 31825 38272 37799 38390 42172 42363 36728 39810 39529 42861 40516 35040 36960 43584 39785 41635 38088 37893 33654 40040 42370 34624 33058 34967 37606 42496 39450 40487 37315 42486 37251 37320 35160 38388 34183 33792 38121 41108 36840 42805 35976 37252 33746 39468 42169 34864 34653 33362 38643 42733 40398 34656 34886 36576 32562 35976 42416 35211 37994 33065 40627 41029 36528 41820 36768 37090 35900 38135 36342 42763 39180 39959 36804 41511 36275 36599 36371 37931 33821 42753 36560 42572 40179 41789 40448 42869 36183 37930 33129 42618 35815 42056 41036 34272 41627 43127 36472 36492 34074 41762 38976 41507 40107 41344 38864 36594 35997 36294 37644 40293 42034 40057 36188 34316 35206 33902 34770 43037 40176 40640 39760 37099 36228 36665 37361 40997 41704 40105 36976 34312 33173 42287 38912 40036 38646 41837 35377 33312 37461 41026 39388 40896 35937 35845 35858 36225 38523 41593 42305 42720 37329 38000 37978 42568 41392 34007 38395 36548 37569 42340 43008 39948 35996 37413 35847 41526 41930 42544 43424 37303 37415 42227 43207 40761 38874 37031 36627 41248 43040 42549 37429 38464 36680 42797 40240 35016 35881 34832 39841 40739 39381 35772 34060 40849 37332 36020 34176 41240 41567 33522 37026 36691 38645 40882 37696 35991 33719 42409 39776 42608 34880 32723 40330 40227 36380 38113 37335 41408 40925 36661 42672 41944 38758 42864 41789 41750 36412 41764 33344 33362 43093 37624 34407 40276 41836 36352 35799 34005 39276 39007 37208 43648 39480 37847 37014 43608 40504 38618 38164 39650 39200 38464 36682 34512 41813 41329 42862 41780 36139 32407 41072 35259 35511 36251 42362 37591 34560 39261 41874 34039 41463 38816 35029 32480 36112 43384 41338 33359 38240 41696 34359 37639 34646 40816 43532 38272 41002 42578 42965 41456 38280 42922 41305 36128 38282 35735 42176 34241 42184 41108 38886 42608 42935 35012 40516 37755 33322 42662 33429 40664 36208 43080 42674 34395 39190 38608 42279 43177 43161 40162 37464 36904 41636 35549 34608 38224 35876 34281 42170 35512 38525 34935 41440 35700 36105 40274 35490 35995 42440 42291 40517 40320 37797 44016 35099 34868 38105 38256 34816 39221 32280 36125 34713 32466 39016 37517 42035 36419 42455 43415 39516 35681 35655 35287 35221 35287 41664 33908 34922 33552 42893 37737 36864 33681 33216 35653 34512 38488 37633 37333 37707 42144 39605 32961 36138 37783 38960 41197 37170 38902 34833 32526 38755 41008 37063 35576 41796 38208 36429 39056 40081 36225 42604 42068 35471 42268 33600 35200 40341 37596 37200 40767 34515 33572 41325 36469 42688 42614 37148 36116 39757 34960 35015 38802 37737 39728 40168 32988 34109 38831 33368 42353 34443 35032 39058 41473 34524 40391 42796 34399 41926 37285 42001 42263 36714 34923 39395 42816 34165 38080 37952 39239 40747 33224 34318 40984 35975 38381 41926 35667 33591 36950 38326 39459 40907 33735 40400 39264 34470 41239 34971 34788 42247 37009 37467 40416 42224 33610 40704 38870 35896 41336 42964 42660 39922 35088 33385 42260 36456 39880 40800 38466 40680 34963 33956 42708 35597 35703 37536 35242 41108 36100 38701 36992 34448 33038 41144 38420 34104 40704 43328 43115 43947 33458 37227 
24271 24285 22637 24481 22977 22915 23537 22665 23942 22828 24006 23435 23283 24423 22243 23309 23064 22824 24033 22710 24276 23096 22632 24316 22267 23196 23172 22909 24080 22852 24492 22498 22836 23817 22928 23269 23256 23112 23687 22977 23747 23000 23141 23386 23052 23335 23081 23393 23577 22449 23767 22912 23297 23149 23374 23428 23321 23632 23057 23123 23412 22989 23554 22964 23631 23175 23192 23553 22984 23113 23285 23010 23636 22961 23710 22917 23287 23387 23136 23279 23097 23253 23523 23142 23740 22858 23222 23082 23267 23213 23198 23300 23607 23081 23727 22903 23272 23327 23161 23048 23267 23023 23621 22968 23712 22888 23225 23373 23123 23025 23256 22997 23657 22990 23680 23040 23331 23350 23099 22963 23460 22935 23721 22721 23670 23057 23479 23342 23353 22741 23723 22719 23464 22764 23380 23170 23233 23363 23285 22793 23781 22727 23334 23148 23160 23018 23290 22875 23591 23861 24274 22667 22615 22630 22835 22788 23849 24221 23305 23492 22918 22050 22731 23496 24117 23596 23609 22978 22500 22599 22710 23249 24071 24145 22908 22856 22826 22868 23157 23531 23406 23155 22957 7981 13684 15081 15900 16503 15993 16455 16576 16497 16737 29996 27031 25438 24892 24517 23883 23898 23994 23897 23900 24157 23481 23746 23415 23271 23262 23684 23672 23638 23431 23379 23174 23493 22989 23217 23403 23792 23169 23519 23153 23136 22903 23616 23355 23618 23431 23207 22976 23347 22856 23401 23331 23851 23042 23373 22949 23159 22854 23714 23559 23496 23306 23410 22801 23231 23129 23816 23207 23915 22998 23506 23130 23189 22890 23453 23263 23814 23434 23539 23029 23417 22737 23243 23093 23746 23307 23806 23004 23581 22867 23132 22820 23358 23271 23703 23385 23342 22872 23397 22643 23200 23096 23761 23130 23698 22881 23392 23024 23211 22670 23472 23088 23751 23377 23555 23144 23260 22853 23316 22831 23415 23237 23874 23189 23706 22885 23198 22981 23223 23060 23769 23384 23552 23127 23396 22673 23201 22826 23695 23248 23820 22775 23331 22736 23198 22762 23192 22830 23664 23303 23592 23211 23175 22773 23312 22604 22994 22933 23556 23201 23645 22765 23286 22858 23056 22664 23411 23235 23554 23372 23366 23232 23221 22760 23149 22871 23307 23274 23786 23104 23639 22893 23304 22897 23065 22769 23418 23285 23584 23473 23260 23122 14592 15933 17017 17143 17732 18159 19025 18353 19329 18051 26645 25168 24175 23547 24221 24186 24707 24578 24576 24695 23644 23772 23026 22836 23105 22325 22791 23440 24213 24073 24630 23394 23921 22667 23095 22936 22353 22645 22468 22674 23552 23547 24077 24329 23607 23692 22837 22350 22901 22206 22885 22972 23431 23986 24521 23288 23760 22649 22595 22638 22439 22848 23985 24072 24004 24224 23021 23576 22755 22494 22848 22644 22759 23361 23440 23520 23501 23216 23159 23192 22795 23060 23001 23269 23110 23351 23321 23567 23112 23497 22952 23202 23103 22907 22811 23229 23168 23402 23506 23370 23365 23186 23126 23053 22997 23138 22778 22952 22926 23082 23146 23405 23272 23685 23239 23639 22886 23403 22841 22965 22759 23182 22935 23511 23436 23452 23380 23181 23064 23207 23004 23121 22744 22969 22976 23381 23237 23781 23047 23649 22805 23218 23316 23048 22827 22969 22697 23189 22912 23505 23351 23445 23174 23172 22762 23515 22560 23011 23014 23270 23127 23778 22924 23504 22863 23104 22837 23048 22648 23474 23106 23636 23233 23611 23232 23297 23007 23300 22648 23275 22680 23111 23029 23637 23120 23754 22976 23597 22950 23546 22786 14465 17912 18700 18688 19569 19223 20152 19959 20140 20019 27095 25029 24512 23721 24135 23117 23623 23379 23841 23498 24064 23258 23884 22976 23526 22958 23204 23049 23100 22805 23328 22922 23546 23282 23667 23439 23470 23248 23300 23159 23264 22890 23216 22703 23378 22689 23313 22750 23242 23029 23675 23175 23847 22953 23652 22830 23597 22763 23399 22882 23202 22841 23178 22702 23189 22793 23452 23133 23436 22972 23517 23260 23648 23365 23550 23475 23489 23365 23384 23329 23304 23229 23272 23153 23288 22905 22647 22717 23385 22714 23116 22956 23378 23184 23651 23269 23745 23268 23661 23351 23796 23355 23869 23193 23796 23159 23796 22889 23557 22837 23484 22831 23165 22736 23344 22716 22981 22764 22562 22786 22427 22741 22252 22588 22301 22458 22608 22459 23308 22965 23467 23090 23893 23752 24064 23901 24153 24291 23778 24163 23397 23936 23285 24152 23369 24098 23312 24129 23383 24014 23442 24131 23047 23729 23023 23574 22880 23420 22843 23845 23107 23497 22829 23760 22853 23365 22776 22826 23247 22760 22960 22935 23005 22948 23015 22949 22886 22925 22867 22901 23044 22889 22883 22882 22891 22809 22889 22905 23045 22999 23059 22961 18916 19860 20243 20386 20531 20649 20583 20754 20764 26981 24681 23907 23601 23537 23442 23296 23119 23227 22771 23158 23182 23086 23015 23118 22998 23063 23094 23015 22901 23012 22967 22965 22984 23012 22865 23031 22975 23042 22895 23028 22901 22956 22887 23057 22854 23028 22785 22994 22737 23001 22861 22993 22837 23011 22987 23260 22793 23130 23097 23172 23388 23238 22731 23360 22807 23311 23302 23418 22761 23373 22736 23369 22727 23382 22741 23309 22785 23288 22814 23231 22825 23265 22769 23360 22765 23530 22873 23750 22889 23735 22824 23688 22837 23674 22761 23632 22803 23693 22893 23721 22956 23747 23028 23779 23172 23728 23168 23664 23169 23532 23203 23466 23173 23268 23004 23390 23005 23271 22880 23131 22767 23277 22587 23285 22581 23262 22557 23296 22586 23363 22547 23319 22585 23401 22747 23063 22832 23713 22823 23163 22791 23229 22864 23209 22881 23309 22803 23212 22893 23175 22945 23261 22835 23172 22997 23180 22960 23163 22997 23173 23061 23182 23177 23303 23280 23377 23270 23400 23344 23373 23456 23565 23425 23584 23271 23648 23424 23719 23333 23292 22556 23047 22268 22700 22364 22364 22475 22242 22818 22623 22513 20198 21026 22353 21396 22824 21848 23053 21962 23121 22346 25370 24167 24717 23981 24441 24004 24320 23489 22935 22832 22621 22281 22595 21999 22644 22023 22856 21937 23011 22299 22781 23336 22807 23476 23034 23702 22970 23552 22901 23552 22799 23552 23000 23471 23015 23544 23021 23572 23000 23616 23014 23584 23172 23659 23317 23576 23361 23507 23212 23139 23142 23022 22919 22826 22792 22969 22713 23024 22735 23053 22746 23275 23176 23082 23255 23211 23382 23265 23424 23442 23444 23527 23416 23544 23392 23501 23271 23538 23036 23362 22871 23201 22701 23021 22720 23015 22752 22988 22744 23068 23031 23263 22836 23417 22788 23364 22779 23492 22835 23548 22889 23600 22887 23637 23023 23592 23004 23711 23169 23758 23085 23797 23168 23792 23139 23766 23198 23702 23188 23768 23117 23608 23169 23570 22868 23148 22709 23133 22567 23261 22635 23246 22670 23264 22652 23366 22781 23546 22848 23219 23178 23435 23261 23480 23325 23592 23335 23713 23255 23677 23160 23630 23105 23503 22999 23477 22998 23497 22808 23296 22579 23090 22471 23140 22728 23104 22558 22994 22598 22991 22832 22925 22848 23204 22839 23428 22780 23406 22753 23424 22785 23531 22757 23463 22689 23608 22772 23625 22660 23569 22865 23780 22982 23751 23017 23793 23064 23824 23177 23728 23213 23651 23117 23485 23068 23269 22865 23120 22609 23085 22531 23164 22600 23237 22583 23403 22880 23178 22889 23044 23128 23200 23170 23296 23256 23552 23171 23464 22842 23095 22739 23012 22855 23079 22928 23009 22700 23524 22916 23660 23091 23601 23136 23552 23040 23204 22752 22964 22528 22909 22421 23053 22587 23040 23171 23096 23840 23755 23878 23707 23040 23223 22387 22493 22679 22477 23189 23470 22893 24360 23782 23977 23499 22772 22337 22727 22017 22794 23163 23127 24205 24156 22762 22720 22515 22332 22345 23380 22928 24347 23901 23361 22261 22855 22493 22838 24137 24027 23291 22281 22720 23024 23002 24308 23600 22770 22031 22862 23311 23450 24054 22892 22606 22599 22679 24313 23851 23619 22643 22725 22565 22624 24226 23552 22555 22745 22921 23191 23307 23377 23408 22666 22934 22872 23547 23340 23045 22780 23097 23323 23499 23286 23060 22978 23161 23010 23597 23331 22957 22772 23114 23360 23506 22882 22923 22911 23482 23343 23150 22729 23141 23328 23511 22925 22934 23342 23559 23273 23389 22677 23227 23360 23435 22890 23203 23025 23808 23008 23348 23285 23576 22989 23090 22865 23792 23215 23185 22962 23395 23259 23128 22898 23682 23271 23111 22956 23470 23173 23047 22788 11110 14324 15075 15351 16199 16467 16512 16765 17284 16899 28430 26056 25959 24704 24658 24058 24854 23817 24108 23936 24380 23287 23799 23637 23728 23012 23560 14943 16658 17159 17931 17844 17987 17838 18523 18519 18520 26967 26702 25303 25159 24861 24949 23956 24606 24177 24042 23649 24387 23346 23793 23592 24035 23173 17349 18607 18911 19015 19912 19105 19766 20027 19804 28535 26551 24776 24384 24209 23944 23453 24317 23188 23655 23648 23590 23151 24137 23017 23767 23560 23490 19406 20512 20215 21194 20264 21385 21006 21120 21239 26304 24467 24969 23618 24034 23741 23737 23608 23537 23585 23725 23260 24025 22960 23452 23322 23295 20462 21464 21661 22417 22265 22650 21739 22157 22269 22050 24224 24152 23241 23816 22959 23759 23300 23337 23552 23159 23216 23065 23205 23764 23074 24172 22749 23257 23050 22864 23630 22753 23800 23289 22732 24133 22237 23800 22616 23520 23851 22989 24247 23048 22661 24144 22152 23519 22839 23443 23845 23144 24382 22685 22821 23938 22318 24023 22553 23854 23591 23162 24341 22368 23168 23218 22893 24241 22854 24496 22684 22841 23815 22321 23545 22693 23448 23961 22502 24417 22130 23156 23170 22523 23943 22613 23712 23660 23154 23589 23357 23032 23701 22850 23557 23047 23680 22961 23145 23339 23083 23323 23012 23312 23572 23211 23663 23049 23118 23580 22983 23252 23019 23434 23325 23032 23648 22817 23358 22976 23340 23364 23225 23393 23214 22986 23488 22896 23574 22880 23735 23128 23239 23408 22954 23096 23139 23129 23651 23095 23719 23078 23175 23424 23080 23216 23101 23272 23479 22935 23740 22727 23436 22818 23364 23342 23274 23357 23344 22832 23749 22663 23490 22813 23458 23341 23303 23326 23482 22676 23862 22711 23327 23200 23186 22989 23360 22821 23722 22736 23657 23094 22971 23369 23325 22880 23712 22666 23233 23216 23134 22952 23338 22845 23618 22807 23666 23177 23335 23309 23416 22753 23841 22899 23529 23384 23367 22765 23864 22759 23335 23272 23121 23043 23360 22703 23533 22752 23369 23152 23141 22868 23569 22818 23216 23215 23301 22818 23703 22787 23581 23233 23248 22960 23735 22635 23369 23117 23270 22804 23580 22561 23466 23136 23192 22944 23616 22694 23396 23152 23165 22856 23464 23002 23159 22999 23705 22725 23287 23308 23120 22867 23727 23100 23205 23240 23645 22772 23224 23073 23276 22624 23262 23361 23033 22895 23703 22884 23338 23365 23497 22925 23566 23255 23136 22824 23417 23108 22949 22915 23855 22809 23212 23558 23856 22359 23141 23433 23362 22251 23144 24204 23059 22723 24696 23611 22865 23138 23959 23337 22273 22718 24634 23405 22828 23568 24292 22888 22349 22717 24592 23494 22817 22904 23882 23856 22775 22801 23985 23918 23449 22221 22903 24230 23400 22688 22928 23254 24388 22933 23077 23629 24020 23443 22370 23319 23907 23761 23879 22220 22831 24272 24026 22778 22885 23123 23356 23541 22970 22931 22983 23680 23258 23060 22784 23115 23527 23439 22993 23000 22978 23663 23465 23015 22880 23184 23359 23637 22854 22969 23027 23703 23410 23077 22784 23256 23388 23592 23168 23133 23112 23336 23087 23673 22960 23273 22984 23210 23406 13173 14001 15118 15352 16387 16062 16214 16001 16673 31344 27899 26344 25382 24688 24887 15287 17357 17583 17856 17668 18355 18436 18935 18561 18727 27018 26306 25157 25455 24298 16668 18402 19560 19872 20370 19992 20183 20011 20505 20007 27347 25316 24759 24013 24410 24183 20613 20777 21147 20588 21280 20842 21847 21285 21275 25775 24693 24130 24296 24077 24243 21224 21959 21619 22541 21916 22896 22001 22284 21651 22291 23927 24100 23738 23856 23144 23479 23137 24020 23525 23571 22989 23660 23261 23576 23648 23770 23007 23288 23345 23725 23181 23953 23148 23301 22765 23552 23200 23675 23412 23693 22855 23321 22943 23847 23194 23828 23008 23559 23128 23468 23555 23671 22881 23177 22685 23757 23296 23868 23263 23128 22841 23360 23241 23684 23158 23228 23073 23414 23015 23899 23447 23287 22855 22770 23243 23698 23481 23570 22796 23216 22983 23980 23385 23381 22863 23664 23302 23580 23417 23581 22699 23239 22977 24202 23537 23024 22451 23111 24222 24158 23148 22739 22964 23374 23316 24472 23928 23004 22166 22962 23506 23512 24356 23460 22621 22659 22717 24328 24016 23926 22992 22802 22656 22921 
22833 21988 22574 22257 22247 22549 22212 21882 22610 21860 22776 21595 23144 21779 22691 22473 22332 21767 22634 21837 22937 21543 23169 21879 22230 22500 22273 21918 22310 21997 22839 21729 23106 21740 22439 22451 22038 22072 22199 22103 22922 21743 23207 21497 22528 22219 22253 22125 22380 22145 22480 21767 23049 21368 22936 21649 22839 22232 22535 22413 22251 21895 22505 21664 22947 21608 22843 21959 22291 22615 22023 21963 22252 22007 22822 21639 23051 21788 22419 22209 22229 22376 22124 22372 22507 22010 22971 21521 22371 22119 22208 22157 21968 22225 22761 21671 23072 21712 22306 22397 22135 22086 22184 22085 22844 21573 23163 21810 22181 22428 21879 22158 21856 22411 22946 21201 23763 21573 21948 22965 21219 22200 21836 21946 23223 20882 23393 22567 21796 23639 21154 21609 23115 20738 22608 21273 22144 22747 21645 23732 21396 21557 23825 20809 21899 23057 20968 22134 21927 21443 23206 21041 23318 22208 21579 23600 21325 21514 23820 20752 22205 22491 21225 22701 21216 22566 23031 21083 23815 21677 21901 23568 21051 21700 22778 20896 22134 22223 21713 22480 22144 22009 22131 22513 21675 22489 11409 13310 13320 13942 13603 14693 14202 29874 28481 28372 26286 26424 25127 24832 23965 24312 23847 24533 23956 23767 23128 23572 22682 23120 23016 23767 22948 23576 22515 22947 22474 22669 22237 23169 22998 23021 22508 22810 21947 22644 22338 23259 22497 23335 22160 22597 22034 22443 22340 23104 22796 22716 22460 22912 21783 22331 22577 23404 22586 23240 22204 21633 21279 22631 23047 23496 23741 22465 22368 21995 21331 21715 21592 22310 23063 24074 22286 23501 21568 21248 21241 21763 21729 22947 23617 22714 23020 21713 21011 21365 21512 22877 22941 23963 21808 22597 21708 21167 21144 22336 22997 23204 23827 22123 22501 22100 20775 21292 21243 22627 23046 23507 22990 23830 21909 22161 21672 21147 21363 22521 23009 22316 22732 22075 22465 21894 22262 22035 22747 22617 22459 22379 22120 21696 21952 21916 22519 22506 22768 22004 22596 21918 21968 21889 21928 21834 22576 22520 22688 22528 22187 21982 22321 21512 21989 21985 22678 22311 22864 21829 22347 21916 22008 21644 22341 21948 22544 22724 22551 22348 22232 21704 22253 21752 22432 22313 23084 22380 23072 21936 22413 22067 22180 21571 22555 22273 22816 22407 22500 10813 12551 12964 14415 14612 15717 16071 17157 16547 29746 28089 27512 25749 25369 24245 24818 24055 24455 23586 24161 23554 23667 23078 23329 22496 23234 22112 22813 22522 23416 22678 23460 22368 23347 22319 22894 21744 22508 21970 22237 21828 22818 22337 22979 22712 22852 22453 22560 21835 22695 21655 22281 21747 22979 22278 23165 22136 23128 21799 22366 21664 22459 21808 22853 22422 22851 22508 22829 22368 22421 21853 22478 21414 22151 22352 22675 22348 23194 21935 22776 22037 22280 21424 22320 21651 22517 22020 22982 22439 22881 22375 22557 21965 22480 21559 22065 21646 22685 22275 23030 22129 23083 21954 22871 21877 22528 22057 22160 21799 22073 21531 22336 22158 22738 22508 22791 22555 22523 22161 22805 21559 22167 21639 22232 22051 22865 22360 23040 22109 22817 21988 22517 22120 22097 21661 22208 22041 22795 22335 22736 22328 22315 22343 22371 21917 22529 21638 22157 21557 22247 21978 22979 22323 23153 21933 22729 21829 21450 20805 21504 21152 22830 23272 23009 23214 22030 21781 21732 20688 21509 21421 21504 21624 22716 22972 24004 22365 23437 21637 21834 21526 20865 21022 21908 21812 22842 23218 23168 23460 22987 23561 13102 15032 15483 15271 16273 15981 17321 18603 19806 19397 29093 26880 27043 24462 24562 23481 22615 22360 22372 22413 23173 23689 23872 24307 22713 23310 22331 22216 22179 21185 21861 22029 22027 22440 22397 23010 22762 22825 22678 22624 22855 22451 22343 22400 22199 22437 21794 22272 21863 22064 22316 22614 22538 22921 22601 22897 22406 22976 22096 22741 22028 22364 22059 22144 21855 21946 21760 22146 21831 22120 21791 22400 21999 22667 22467 23040 22656 22904 22701 22706 22701 22720 22689 22565 22464 22267 22283 22388 21920 22541 21687 22278 21593 22281 21897 22510 22091 22350 22069 22568 22189 22779 22378 22981 22311 23074 22301 23011 22001 23048 21909 22979 21876 23002 21896 22852 21930 22573 21782 22506 21773 22470 21760 22371 21800 22211 21709 22095 21413 22248 21545 22240 21718 22583 21929 22637 22125 22860 22533 22775 22408 22646 22496 22784 22471 22769 22485 22949 22551 22839 22464 22842 22384 22762 22358 22597 22292 22484 22229 22680 22381 22627 22320 22726 22377 22535 22211 22447 22007 22452 21916 22381 22178 22389 21833 22278 21858 22311 21844 22417 21721 22915 21536 22680 21683 22504 21650 22842 22033 22496 22001 22436 16379 17818 17831 18721 18537 19597 18997 19712 19499 26311 25295 24903 23879 23929 23192 23364 22919 22961 22741 22865 22538 22726 22365 22599 22196 22720 22272 22619 22151 22520 22129 22523 22041 22409 21847 22622 21965 22521 21932 22250 21767 22663 21765 22394 21743 22300 21952 22826 21922 22010 21844 21903 21607 22627 22535 22334 22984 22227 23044 22246 22986 22266 23322 22275 23397 22285 23050 22605 23573 22306 23510 22489 23479 22292 23409 22108 23279 22292 23356 22261 23490 22386 23528 22572 23612 22953 23612 23220 23599 23191 23520 23237 23583 23171 23466 23053 23712 23207 23433 23143 23040 22933 22571 22836 21928 22204 21860 21939 21639 21371 21705 21804 21970 21656 22016 21773 21925 21575 22176 21610 22027 21936 22085 21952 22167 22016 22072 21973 22140 22049 22195 22204 21691 22297 22135 22342 22162 22224 22222 22277 22257 22385 22208 22320 22288 22333 22211 22413 22339 22267 22438 22397 22305 22375 22431 22356 22423 22397 22460 22441 22501 22411 22615 22415 22849 22392 22809 22311 22817 22391 22719 22129 22635 21955 22586 21930 22366 21768 22534 21528 22129 21596 21928 21725 22135 21701 22193 21724 22617 21623 22797 18746 20598 19926 21355 20349 21697 20750 21795 21085 21968 23968 24246 23092 23618 22823 23179 22611 22424 21953 22365 21587 22513 21543 22448 21686 22567 21888 22562 22018 22476 22369 22679 22437 22856 22512 22767 22507 22711 22394 22585 22392 22624 22535 22825 22455 22838 22563 22921 22442 22854 22322 22916 22352 22980 22237 22720 21885 22412 21539 22112 21436 22090 21672 22148 21803 22068 21818 22231 21812 22307 21430 22803 22004 23040 22037 22988 22279 22935 22275 22817 22236 22542 22099 22427 22004 22289 21780 22307 21635 21920 21599 22103 21482 22251 21506 22379 21525 22593 21815 22660 22162 22387 22330 22510 22429 22499 22627 22592 22657 22657 22899 22807 22755 22907 22939 23072 23052 22977 22376 22755 22345 22604 22164 22631 22231 22304 21721 21914 21583 21933 21308 21559 21144 21207 21271 21028 21521 21288 21410 21904 21815 22353 21616 22930 21469 22552 21671 23119 21888 23643 22819 23432 22855 22954 22640 22439 22023 21952 21488 21548 21155 21344 21191 21184 20981 21192 20910 21142 20640 21236 20544 21408 20675 21541 20983 21739 21073 21646 21321 22009 22358 21718 22688 22073 22848 22043 22796 22023 22880 21995 22949 22112 22898 22228 22886 22427 22960 22265 22856 22282 22725 22375 22748 22390 22641 22327 22550 22353 22489 22141 22287 21963 22021 21804 21976 21705 21915 21711 22141 21680 21664 21943 22217 21927 22153 22112 22259 22189 22295 22388 22598 22412 22742 22448 22581 21861 22283 21685 21952 21775 22098 22021 22323 22095 22592 21780 23005 22124 23072 22288 22711 22139 22377 21918 22087 21515 22055 21444 22218 21542 22357 21691 22181 22192 22455 22351 22715 22115 22629 21847 22354 21559 22050 21756 22377 21722 22934 21847 23125 22172 22814 21657 22186 21396 22264 21491 21803 22018 22553 22423 22790 22171 22203 21513 22085 21768 22599 21989 23052 22209 22540 21680 22240 21727 22329 22391 22756 22060 22169 21666 22609 21802 23152 22132 22395 21338 22583 21995 22643 22385 22769 21678 22378 21697 22972 22160 22708 21624 22173 21797 22411 22444 22784 21735 21913 21882 22662 22003 22810 21881 22036 21472 22305 22260 22859 21974 22085 21627 22895 21959 22561 21467 22261 21670 22452 22309 22844 21588 22186 22069 22923 22196 22384 21400 22405 22286 22814 21939 22116 21987 22790 22245 22496 21569 22298 22295 22712 22151 22185 21545 22944 22284 22041 21721 22328 22587 22561 21895 22763 22342 22556 21450 22298 22533 22731 21549 22311 21890 22855 21861 22370 22490 22793 21544 22182 22039 22744 21540 22472 22961 9266 9472 11533 13006 15217 13731 14711 16103 16664 15141 28451 28636 27720 24821 25333 26673 24832 23552 25004 24584 23042 22416 23400 23294 21903 22365 24692 11180 13117 15742 16582 15121 15624 16593 18839 16495 29697 30696 28531 25759 27632 26084 24240 24634 25216 23364 23096 23958 23693 22069 23345 23892 21725 22547 16039 14729 16411 18744 16857 18325 19480 18850 19132 29268 27436 26479 25410 25152 24000 24719 23624 23661 23792 23511 22971 23776 23026 22804 23575 22790 16534 18055 17883 18989 19528 19497 20049 19835 20455 20783 26275 26344 24835 24563 24584 23705 23366 23989 22863 23616 22548 23473 22705 22932 23125 22522 22424 19994 19654 21024 20246 21616 21073 21422 21600 21366 21120 25180 23192 23633 22995 23074 23023 22791 23053 23087 21735 23265 21891 23002 22046 23015 22562 22624 22723 22261 22066 22943 21907 23068 21792 23271 21994 22559 22513 22378 22287 22382 22125 23134 21633 23225 21916 22608 22465 22301 22237 22384 22359 22901 21996 23239 21908 22437 22315 22352 22288 22247 22432 22712 22327 23235 21607 22651 21710 22693 22292 22445 22410 22441 21795 23089 21688 22845 21585 22895 21943 22061 22647 22294 21794 22562 21593 22892 21796 22692 22246 22093 22560 22379 21956 22887 21955 22920 21788 23316 21640 22489 22100 22301 22080 22166 21992 22913 21698 23096 21783 22544 22170 22305 22234 22257 22464 22455 21856 22960 21637 22647 21624 22707 22264 22352 22584 22087 21924 22449 22141 22805 21755 23027 21818 22347 22411 22092 22213 22192 22119 22811 21795 23060 21809 22389 21915 22160 22334 22113 22396 22411 21888 22892 21541 22572 21492 22501 22359 21889 22848 22303 21896 22592 21371 22706 20948 22811 22688 21508 23303 22222 21309 23915 20810 21861 22650 20836 22123 22116 21613 23337 20994 23584 22495 21781 23711 21745 21719 23822 20805 21784 22923 20811 21809 22203 22242 23111 21048 23133 22844 21542 23162 22928 21443 23720 22304 21655 23435 22241 21590 23872 21001 21767 22924 21031 21991 22201 20847 22367 22009 20978 22420 22519 21776 22070 22513 21655 22214 21819 22279 22353 22056 21937 22427 21916 22029 22110 22580 21704 22324 22199 22054 22280 22366 21669 22408 22128 22039 22052 22372 21698 22227 22504 21954 21927 22904 21792 22255 22433 22227 21721 22848 22292 22135 22058 22727 21801 22050 22008 22656 21528 22277 22592 22344 21815 23030 21939 22115 22301 22707 21463 22566 22130 22296 21655 22428 22348 22240 22021 23046 22155 22117 22148 22810 21653 22185 21864 22812 21641 22439 22543 22711 21671 23101 22237 22256 21760 22699 22282 22336 21776 23182 22169 22307 21691 22750 22046 22204 21816 23031 22253 22145 21686 22512 22448 22379 21705 22744 21997 22779 21571 22529 22340 22779 21547 22339 21635 23015 22051 22289 21864 22752 22288 22272 21883 22731 22101 22969 21736 22051 22351 22751 21942 22028 21911 22880 22226 22253 21419 22370 22147 22897 21302 22279 21568 23089 21989 22184 21376 22537 22444 22960 21665 22099 22407 22875 22317 22609 21495 22402 22407 22828 21820 22040 22128 22921 22250 22465 21531 22254 22021 22486 22417 22342 21602 22419 21837 22960 22148 9123 10608 12597 13772 14439 14049 14679 14805 16030 30595 30208 27821 27232 26036 25938 14150 15458 15108 16456 16822 18445 17990 18708 17555 30337 29768 28769 27472 25799 24822 16171 17081 20064 19390 18988 18060 19033 20439 20531 21123 28394 25980 25144 24812 26613 19648 19702 18469 19443 20190 20793 22187 21577 20047 19750 26026 26497 25234 25963 24234 23004 19655 20916 22172 22202 23057 21445 20648 20750 21249 26154 25092 24781 22997 22564 22146 22865 24485 24027 22198 21512 22369 23107 23034 23254 23146 22369 22551 22499 23072 22509 23258 22508 22410 22058 22649 22919 22840 23005 22682 22039 22263 22361 23085 22683 22965 22221 22403 22421 22620 22746 22755 22038 22080 21873 22967 22496 22976 22259 22119 21815 22493 22559 22851 22359 22288 22008 22521 22141 23207 22400 22448 21731 22575 22528 22835 22565 22602 21678 22352 21894 23237 22297 22397 21719 22252 22360 22743 22432 22446 21678 22363 21910 23143 22374 22331 21760 22438 22546 22960 21859 22362 21799 22720 21984 23205 22173 22385 21536 22477 22175 22631 22542 22863 21504 22424 21855 23024 22272 22887 21796 22331 21660 22388 22482 
