# Supplementary material for: An Active Feature Selection Strategy for DWT in Artificial Taste
Source: Hindawi journal article supplement (doi:10.1155/2018/9709505), 2018-01-01
Supplement: f1 [file 9709505.f1.zip › oolongTea-low-3.txt]

43490 43480 42517 38840 1878 14016 18758 19584 21218 21226 22699 21972 22984 22016 22450 22049 22888 22682 23102 22010 22568 22276 23049 22272 23434 22496 23175 22193 22808 22391 22884 22774 23148 22450 22880 21841 22752 22293 23598 22789 22496 21799 22494 22421 23025 23141 22681 21497 21765 21969 23904 22901 23708 22320 21740 21413 22180 23940 23505 22521 22158 21521 22139 22041 23895 23118 23529 22104 21972 21582 22432 23936 23402 22277 21455 22181 22789 22565 24024 23267 22409 21481 22166 22734 22533 23616 22978 22680 22172 22535 22246 22797 23000 23092 22807 22916 22327 22442 22511 23000 22528 23209 22805 22996 22533 22491 22112 22759 22536 22789 22901 23207 22626 23008 22048 22528 22182 23272 22394 23371 22409 22743 22010 22664 22540 22944 22785 23310 22230 22625 22034 22929 22242 23537 22563 23004 21967 23347 22615 23077 22743 23234 21989 22644 22228 23329 22212 23617 22400 22776 21952 23108 22583 23435 22320 22949 21924 22845 22148 23417 22455 23235 22022 22882 22018 22809 22728 23351 22542 22997 21943 22983 22016 23477 22344 23264 22123 22792 22153 23015 22646 23349 22294 22743 11144 16599 17409 19228 18550 20088 19072 19911 18760 19883 28977 26534 24672 24578 22995 23340 22603 23477 22548 23764 22840 23479 22684 22660 22139 22984 22553 23138 22980 23278 22628 22784 22045 22663 22477 23152 22422 23489 22641 23139 22359 22621 22054 22615 22927 23046 23040 23388 22192 22528 21478 22124 22106 22760 22289 23700 22893 24103 23213 23185 21568 21961 21511 22711 23275 22970 23846 23464 22734 22464 21557 21482 21836 22202 22096 23835 23017 23482 22519 21800 21378 22259 22306 22360 23620 23136 23662 23255 21978 21355 22375 22840 22788 23080 23050 22848 23005 22065 22531 22198 22567 22496 23272 22669 23264 22746 22752 22573 22408 22231 22662 22439 22796 22853 23046 22876 23180 22306 22739 22124 22640 21678 23209 22528 23376 22675 23035 22299 22487 22076 23209 22498 23149 22656 23243 22176 22625 22053 22943 22144 23372 22357 23603 22487 22903 21988 22775 22016 23092 22583 23015 22744 23259 21986 22780 21972 22967 22081 23493 22497 23427 22172 22705 21852 22973 22586 23208 22715 23072 21869 22709 22183 23351 22196 23560 22528 23069 22011 22700 21913 22989 22688 23297 22581 23090 21942 22707 22114 22873 22090 23536 22496 17791 18624 20105 19405 21127 20535 21496 20960 21732 30615 26279 23714 23752 22961 23776 22691 23803 22807 22740 22198 23024 22572 23101 22955 23319 22394 22641 22195 22794 22379 23426 22549 23283 22423 22669 22017 23063 22531 22880 22852 23232 22233 22589 22112 22953 22519 24109 22547 21888 21560 22478 23270 23291 23543 22778 21469 21760 22135 24069 23072 22287 21400 22144 22222 22423 23890 23524 22601 22040 21613 21897 22032 24066 23245 23079 22048 22048 22098 22311 23904 23504 23207 22656 21573 21468 22317 22794 22759 23176 22981 22125 22425 22314 23015 22496 23328 22754 23004 22349 22514 22198 22764 22836 22892 23047 22758 22134 22477 22240 22993 22551 23412 22666 23003 22146 22625 21992 22894 22824 23155 22747 23093 21991 22599 22133 22986 22156 23508 22375 23340 22361 22800 21896 22926 22310 23026 22718 23286 22605 23211 22185 22862 21846 22720 21814 23232 22040 23580 22300 23693 22433 23016 22109 22662 21798 22978 22284 22844 22656 23169 22601 23305 22246 23085 21915 22709 21889 22676 22092 23016 21993 23469 22281 23545 22561 23204 22103 22653 21892 22903 22017 22969 22378 22904 22644 23269 22519 23370 22483 23148 22140 16909 19009 20903 20777 21564 21104 22276 21286 22436 21581 26848 24173 23914 22789 22923 22213 23227 22567 22985 22960 23208 22984 23296 22860 23340 22645 23074 22401 22890 21813 22576 22365 22639 22264 23244 22259 23820 22455 24021 22965 24128 23109 24069 23160 23400 22556 22656 22028 21964 21434 21863 21314 21814 21277 21781 21135 21881 21111 22302 21718 22336 23105 22257 23489 22622 23559 22677 23947 22872 23834 22919 23424 22686 23253 22669 23241 22664 23111 22702 23014 22693 22667 22458 22609 22401 22360 22076 22438 22071 22608 22023 22856 22202 22954 22008 22786 22434 22757 22774 22791 22848 23051 22884 23109 22875 23098 22705 23075 22686 23133 22708 23056 22533 23104 22397 23144 22348 23113 22033 22809 21934 22891 21865 22826 21676 22742 21815 22740 21929 22615 22002 22657 22071 22650 21991 22769 22037 22741 21796 22672 22070 22679 21976 22697 21933 22624 22067 22658 21988 22605 22140 22707 22117 22659 22185 22750 22181 22896 21969 22863 22025 22848 22229 22920 22010 23437 22020 23275 22225 23373 22132 23424 22290 23301 22294 23215 22245 23202 22173 23288 22346 23331 22375 23340 22245 23263 22280 23116 22263 23018 22205 22935 19964 21672 21627 21687 21500 21869 21568 21615 21356 25429 22982 22089 21766 21852 21568 21957 21765 22068 21525 21943 21813 22396 21876 22337 22355 22939 23019 23332 23457 23452 23136 23255 23154 23400 23732 23480 23591 22644 23315 22410 23280 22359 23281 22572 23352 22564 23329 22609 23205 22440 23094 22540 23210 22470 23238 22294 23056 22212 22903 22199 22849 22640 22866 22583 22713 22103 22487 22101 22664 21799 22649 21794 22592 21943 22670 21923 22605 21926 23022 22401 23228 22500 23281 22708 23222 22673 23105 22669 23124 22640 22896 22477 22849 22321 22816 21980 22730 21817 22811 21994 22807 21880 22797 22321 23392 22342 23353 22471 23521 22464 23345 22172 23211 22155 23045 22021 22816 21999 22784 22053 22740 21846 22695 21902 22892 22216 23124 22560 23272 22817 23256 22784 23055 22720 22917 22802 22927 22599 22800 22221 22777 21987 22767 21884 22518 22197 22829 22549 23608 22788 24104 22484 23474 22176 22373 22024 21514 21627 21617 21492 22597 23012 23508 23763 22831 23269 22172 21785 22059 21295 21759 21271 21716 21964 22802 23063 23910 22976 23732 22275 22562 22775 21988 22445 21911 22453 22423 23042 22748 23146 22609 21272 21552 22324 22132 22131 21784 22292 21936 22840 22374 24068 23234 23184 22897 22871 22630 22848 22144 22813 21864 22675 22459 23357 22503 23428 22169 23367 22144 23089 22040 22816 21831 22791 22068 23286 22409 23274 22675 22980 22631 22857 22306 22806 21884 22717 21973 22937 22365 23394 22318 23540 22074 23161 22081 22564 22088 22509 22070 22919 22436 23298 22682 23000 22245 23285 21821 22600 21929 22862 22294 23421 22388 23433 22223 22800 22231 22528 21978 22834 22528 23117 22737 22948 22491 22696 21915 22551 22211 22857 22356 23133 22697 23838 22437 23412 22366 21870 21655 21744 21989 23328 23693 23140 23285 22166 22574 22238 21212 21767 22242 23079 23319 24192 22420 23296 22177 21648 21654 22579 23159 23264 24015 22646 22951 22311 22464 21974 22896 22751 23070 22951 22803 22453 22642 22116 22466 22167 22746 22545 23353 22365 23232 22091 22693 22071 22793 22540 23091 22816 22990 22581 22795 22056 22720 21880 22794 22471 23361 22234 23367 22102 22893 21996 22784 21958 23387 22607 23202 22626 22892 22265 22752 21866 22689 22144 23027 22384 23472 22221 23404 22047 22869 21914 22664 22156 23303 22620 23012 22608 22863 22164 22868 21739 22851 22389 23488 22231 23268 22501 22564 21889 22685 22373 23112 22724 22941 22516 22775 22083 22660 22000 22806 22486 23297 22484 23351 22096 22530 21874 22318 21723 22956 22726 23405 23690 22505 22432 22371 21147 21782 21812 22792 23147 24075 22256 22292 21753 21772 21811 22896 23821 22788 22999 22082 21336 21637 21609 22415 22974 22919 22855 22570 22710 22044 22426 22274 22650 22813 23145 22330 22659 22120 22536 22421 23040 22839 22812 22451 22693 21975 22570 22272 22913 22583 23434 22240 23216 22217 22620 21818 22831 22481 23170 22605 22814 21975 22761 21969 22956 22343 23575 22159 23160 22212 22636 21741 22734 22166 23328 22759 22918 22085 22890 21784 22972 22299 23458 22246 23137 22095 22544 21920 23145 22400 23296 22513 22844 21895 22829 22176 23313 22321 23438 22500 22542 21928 23085 22729 22999 22547 22783 21996 22570 22353 23341 22379 23076 22131 22444 22161 23153 22848 22640 21978 22213 22288 23002 22877 23972 22084 22351 21696 22145 22932 23287 23532 22576 21164 21799 22621 23936 22518 23044 22395 21539 21422 22604 23385 23108 22981 22392 21265 22029 23004 23664 22675 22378 22592 22129 22969 22583 23271 22378 22728 22338 22519 22487 22945 22893 22665 22299 22404 22201 23117 22491 23413 22182 22615 21928 22803 22381 23246 22640 22828 21981 22513 22311 23104 22505 23412 14309 17911 17916 19360 19256 20103 19328 20082 19184 36328 27328 25947 23574 23536 22812 23539 23127 23371 22628 23098 21953 23040 22599 23566 22213 23020 22051 17643 19129 20874 20705 21018 20236 21252 20868 22170 30701 26326 23639 24017 22984 23815 22907 23349 22097 22976 22730 23547 22374 22808 22192 23318 22952 12998 18810 20664 20947 22283 21271 21953 21100 22081 22230 27779 24064 23077 22648 23799 23100 23893 22325 21622 22227 23666 23773 22345 21333 22148 23264 23859 17290 19944 21728 22433 22494 21681 20946 22584 22616 22930 24441 22504 22901 22872 23371 22318 22652 22580 23182 22962 22935 22293 22969 22788 23337 22477 22487 20446 22420 22236 22357 21680 22861 22358 22752 22123 22494 23522 23524 22573 22893 22102 23425 22329 23213 21957 23136 22806 22993 22010 22716 22531 23638 21957 22775 22074 23418 22467 22848 22212 23480 22133 22855 21799 22919 22522 23008 21888 22812 22454 23440 22149 22749 22600 22853 21909 22633 22413 23448 22029 22816 22553 22972 21751 22989 22407 23281 22292 22776 22610 22919 22190 22610 22554 23326 22261 22752 22695 22969 22048 22453 22572 23287 22283 22639 22761 22865 22095 21735 22855 24055 22001 21737 23319 22428 21639 21975 23095 23660 21839 22377 23847 22492 21847 21768 23174 23742 22009 21746 23208 22638 22050 21783 23050 23223 22596 22132 22592 22548 23278 22272 22435 22684 22955 22634 22546 22464 23355 22397 22467 22265 23016 22649 22838 22056 23365 22343 22519 22340 23062 22204 22570 22481 23392 22085 22657 22677 22781 21992 22521 22528 23207 22105 23109 22593 23323 21703 23125 22217 22836 21881 23170 22624 22685 22257 23607 22237 22855 22564 22996 21696 23115 22319 23147 21834 23210 22709 22809 22182 23492 22048 22579 22288 23031 21840 22880 22318 23116 21783 23078 22615 22784 22131 23427 22148 22599 22404 23001 22226 22637 22517 23040 22180 22677 22855 22829 21842 22874 22533 22803 21616 23252 22980 22170 22496 23861 21965 21513 22554 22984 21765 21857 23161 23210 21714 22952 23741 22357 21598 23770 22059 21753 21824 23114 22132 21795 23133 23357 21605 23103 23473 22335 22651 22935 22733 21922 22823 22519 22996 22235 22834 22976 21981 22176 23223 22337 22464 22584 22900 22144 22580 22536 23063 22027 23106 22816 23008 22139 23440 22108 22528 22679 22993 22136 22565 22460 23224 22249 22646 22688 22887 21775 23408 22009 22726 22202 23048 21986 22712 22449 23132 21856 23188 22508 22864 22303 23620 22117 22879 22616 22842 21928 23352 21962 22508 22316 23319 22375 22634 22252 23477 21936 23049 22542 23008 21841 23397 22083 22604 22084 23126 22272 22594 22485 22967 21977 23170 22632 22624 22332 23417 22276 22426 22582 22825 22017 22670 22580 22535 21551 23287 22267 21756 23148 23216 21416 23240 23527 22312 21598 24023 21883 21352 22818 22572 21352 22419 22793 21872 21957 23048 21786 22131 22869 22119 21547 22689 22688 21879 23127 22411 22264 22612 22931 22041 22823 22625 22297 22720 22932 22029 23136 22855 22638 22400 23474 22320 23008 22784 22788 22351 23364 21972 23104 22648 22734 22437 23236 21896 23129 22528 22605 22534 23161 21879 9707 16313 18500 18768 19853 18919 20359 19611 19964 19910 30953 25304 25094 23653 23698 22990 18336 19104 20857 20982 21449 20509 22105 20873 21541 31383 26201 23501 24576 22737 23232 17268 20749 20364 22127 21241 21701 21933 22080 21290 22579 25081 23956 23537 23360 22348 18383 20706 21644 21723 22407 21554 22390 22056 22170 21729 25721 23122 22535 23447 23136 21705 22449 22220 21460 22942 22967 21233 23210 22515 21664 25198 23316 21934 23306 21767 21879 23296 22183 22174 23099 21465 22912 22720 22162 23303 22357 22764 22928 22535 22478 23325 22361 22742 23093 22775 22644 23288 22106 23061 22743 22647 22552 23145 22010 23187 22401 22541 22552 23185 21924 23111 22155 22751 22493 22776 22284 22960 21830 23341 22104 22860 22609 23340 22167 23495 22066 23242 22470 22546 22383 23277 21764 23224 22011 22873 21973 22659 22516 22936 22101 23543 22241 23050 22648 22699 22553 23150 21868 23105 21888 23160 22037 22713 22713 22671 22034 23452 21789 23099 22336 22438 22558 22829 22157 22989 21974 23264 22130 22672 22752 22932 22354 23324 21977 23179 22648 22400 22545 22861 21709 22978 21844 23072 22287 
21131 22071 21560 21743 20881 21536 21123 22113 21488 22329 21307 22058 21280 21686 21051 22076 21689 22137 21543 22018 20875 21547 21464 22295 21340 22085 21209 21381 21271 22217 21906 21947 21188 21741 21082 22243 21736 22596 21447 21543 20769 21635 21403 21611 21541 21708 20785 21477 20938 22236 21264 21917 21015 21444 20822 21591 21536 21948 21079 21459 20819 21561 21130 22103 21383 21900 21140 21372 20857 21663 21626 21930 21143 21434 20981 21982 21100 22272 21359 21696 20825 21732 21376 21768 21712 21925 21168 21383 21112 21582 21047 22284 21473 22134 21018 21490 20774 21912 21476 21848 21875 22075 21260 21760 20937 21607 21150 22126 21454 22352 21639 21990 21280 21542 21169 21982 21785 21985 22011 21941 21115 21568 21422 22338 21533 22295 21675 21702 21143 21631 21839 21828 22045 22224 21005 21446 21469 22674 21783 22660 21516 20982 20715 21486 22690 22214 22828 21754 20618 21493 21360 23273 22200 21532 20674 21127 21172 21490 23005 22475 21923 20905 20980 22200 21427 23296 22112 21384 20742 21201 21703 21555 23161 22406 21618 20857 20995 21672 21768 23143 22192 21038 21142 21333 15297 15933 17776 17492 18415 18006 18102 17721 18631 18641 25295 24243 23495 22446 22231 22135 22457 21865 22401 21958 21932 21362 21496 21127 21200 21609 21873 21799 21932 21130 21299 21272 21601 21157 22054 21380 22180 21399 21667 20768 21526 21069 21566 21803 21931 21495 21792 20969 21414 21099 21511 21133 21926 21100 22456 21399 22234 21284 21752 20969 21623 21063 21798 21416 21939 21584 21926 21204 21408 20860 21444 21165 21812 21143 22272 21261 22289 21081 21488 20865 21532 21296 21857 21616 21971 21500 21735 20882 21321 20706 22110 21205 22238 21581 21816 21132 21543 20723 21753 21216 21692 21612 21955 21540 21819 20888 21525 20804 21501 21118 21984 21207 22247 21549 21850 21419 21354 20909 21421 21060 21581 21725 21768 21672 21824 21111 21368 21145 21414 21107 21987 21467 22089 21399 21554 20848 21818 21597 21572 22109 21843 21505 21751 20419 20717 21079 21648 21115 22835 21783 22528 21414 20739 20235 21170 21704 21542 22857 22211 21517 20924 20432 20830 20992 22935 22154 22083 21059 20623 20844 21074 22605 21895 22299 21547 20659 20353 20934 21460 21161 22985 22045 21393 20741 20567 21241 21375 21838 21258 22334 21506 15947 17671 18565 18705 19356 19751 20141 19949 19937 19462 24496 23210 22822 22167 22755 22061 22472 21744 21655 21138 21861 21679 22031 21797 22071 21063 21412 21191 21895 21194 22353 21661 21903 21175 21425 20988 21774 21616 21879 21796 21977 20985 21504 21102 21972 21304 22433 21431 21587 21068 22204 21729 22153 21672 21897 20969 21588 21125 22452 21385 21842 20969 21820 21492 21913 21723 22170 21336 21591 21133 21777 21191 22469 21478 21889 21085 21578 21392 21895 21687 22200 21431 21839 20867 21565 21623 22244 21376 22295 21608 21283 21108 21199 21447 22119 21618 22176 21217 21546 20933 21671 21125 22384 21380 22237 21301 21632 21088 21840 21729 21869 21872 21973 21293 21461 21132 21737 21283 22239 21678 21864 21302 21516 21078 21767 21575 21842 21977 22137 21581 21700 21043 21483 20828 22251 21563 22519 21900 22053 21159 20917 20708 21266 20985 21452 22770 22112 23061 22471 22118 21725 21024 20652 20875 20921 21301 22294 21614 23283 22245 22109 21280 21037 20480 20885 20591 21435 21357 21470 22536 21888 23082 22455 22312 21703 20906 20898 21238 21438 21765 21636 21888 21902 22033 22016 22216 21856 21960 21591 21719 21248 21440 17991 19376 19696 20387 19913 20795 20331 21129 20355 21037 23088 22625 21723 22135 21813 21952 22085 21997 22005 22266 21810 22330 21536 22080 21248 21744 21276 21606 21047 21592 21349 22205 21337 22374 21384 22401 21533 22404 21721 22436 21603 22313 21475 22112 21459 21775 21066 21642 21137 21849 21204 21910 21367 22005 21163 21969 21525 21929 21504 22093 21796 22208 22191 22378 21959 22369 21890 22402 21924 22305 21909 22326 21705 22159 21426 21974 21224 21954 21089 21863 21005 21606 20931 21715 21121 21802 21225 21809 20631 22072 21370 22227 21448 22221 21489 22199 21473 22409 21767 22472 21752 22182 21554 22024 21628 22041 21559 21828 21460 21752 21305 21515 21216 21337 21112 21135 20836 20854 20629 21051 20553 20993 20647 21095 20704 21401 21120 21392 21161 21633 21762 21552 22208 21467 22032 21508 21975 21452 21893 21504 22005 21494 21825 21751 21988 21371 21949 21360 21923 21416 22247 21251 22267 21548 22044 21345 22130 21396 22194 21551 22245 21527 22177 21630 22430 21884 22354 21794 22429 21999 22448 21779 22529 21879 22408 21672 22514 21696 22566 21674 22444 21673 22341 21687 22426 21705 22438 21655 22580 21639 22433 18217 20373 19907 21189 20171 21167 20253 21415 20378 21234 22725 22873 21742 22243 21408 21913 21257 21703 21298 21627 21292 21728 21051 21737 21037 21764 21173 21937 21408 22137 21507 21905 21252 22003 21293 22153 21771 22061 21872 22091 21859 22306 21682 22256 21625 22291 21767 22254 21942 22297 21970 22182 21947 22093 22007 22085 21934 21920 22081 21989 21985 21863 21913 21822 21789 21769 21646 21161 21367 21853 21264 21697 21323 21672 21447 21667 21260 21691 20905 20897 20863 20833 21085 21581 21625 21885 22120 22651 22327 22697 22183 23040 22026 23143 21888 22970 21128 22047 21024 21003 21064 20706 21001 20593 20635 21014 20744 21070 21188 21754 21714 21785 22402 21572 22336 21489 22202 21462 22125 21499 21901 21201 21680 21484 21367 21159 21515 21197 21726 21356 21998 21416 21965 21671 22136 22057 22290 22051 22032 21972 21975 21614 21767 21405 21929 21191 21721 21166 21773 21510 22272 21746 22501 21475 22528 21298 22216 20672 22023 21072 21726 21131 21943 21655 22286 21927 22111 21770 22007 21467 21869 21040 21912 21078 21816 21262 21897 21606 22496 21640 22465 21514 22193 21420 21767 21303 21833 20967 21822 21160 22023 21678 21152 21032 21239 21163 21304 20824 21368 20607 21100 22628 22256 22076 22494 21974 22464 21668 22625 21445 21879 21392 21594 21008 21808 21276 22129 22169 22304 22604 22064 22591 21516 21244 21255 20483 20945 21184 21721 22211 22806 22229 23208 21520 22505 21302 21336 20984 20613 20749 21587 22168 22434 22938 21808 22522 21111 21896 21166 21478 21042 21774 21606 22188 22087 21948 21943 21760 21390 21589 21317 21602 21704 22229 21743 22361 21400 21959 21043 21775 21081 21720 21491 22184 22039 22013 21843 21982 21045 21601 21107 21656 21402 22118 21682 22580 21399 22287 21506 21811 21197 21775 21281 22225 21789 22160 21734 21975 21600 21827 21099 21590 21304 22176 21634 22595 21370 22257 21191 21625 21167 21878 21756 22283 21827 22016 21775 21861 21061 21656 21378 22278 21619 22539 21344 22212 21397 21923 21393 21675 21332 22109 21920 22045 21964 21833 21364 21538 21304 21719 21687 22427 21668 22319 21402 21803 21191 21384 20999 22009 22507 22349 22803 21458 21350 21191 20285 20977 21478 22505 22241 23103 21677 22420 20952 20859 20816 20692 20885 21612 22168 22435 22981 21457 21513 20967 20601 21260 21980 21896 22167 22050 21825 21539 21640 21298 21764 21856 22374 21771 22268 21509 21659 21143 21621 21674 22274 21941 22065 21937 21893 21339 21699 21120 21812 21513 22414 21622 22317 21339 21806 21217 21625 21071 22022 21650 22377 21882 22085 21372 21989 21029 21559 21368 22204 21683 22496 21353 21868 21030 21654 21132 22364 22008 22119 21707 21824 21089 21790 21089 21707 21738 22580 21480 22453 21424 21795 21282 21721 21417 22293 21925 21999 21384 21565 21120 21872 21755 22430 21552 21955 21365 21545 21075 21642 21269 22049 21984 22060 21975 21803 21249 21328 21266 21991 22085 23131 21411 21731 20865 20609 20960 22187 23001 21985 22564 21696 20600 21008 20615 21575 22131 23136 21657 22265 21302 20590 20874 21888 22713 22006 22614 21212 21485 21162 21688 21682 22249 22067 21805 21276 21486 21554 22154 21761 22091 21483 21545 21311 22145 22006 22128 21969 21841 21242 21597 21696 22393 21513 22216 21266 21612 21508 22279 21856 21835 21280 21621 21257 22188 21694 22430 21320 21984 21061 21989 21616 22300 21709 21790 21130 21681 21674 22512 21440 22477 20735 21744 21042 22224 21896 21978 21478 21727 21122 21850 21696 22375 21649 21936 21144 21779 21171 22192 21938 21965 21291 21696 21125 22205 21780 22445 21411 21701 21184 21980 21800 22097 21912 21858 21289 21495 21454 22138 21650 22340 21403 21678 20965 21692 21439 22056 16252 16802 16750 17020 17645 19383 18755 18816 17914 26141 25518 24568 24161 22470 21125 21532 21992 23149 21924 22503 21364 20717 21349 22341 22977 21324 13959 16442 17355 19195 19781 19803 20293 19136 19940 20070 25923 23703 23024 22162 22139 22158 22248 22004 21930 21185 21936 21571 22291 21538 21524 21420 21963 18249 19451 19266 19929 20051 21230 20007 20427 19909 20955 23835 22903 21761 22025 21579 22577 21512 22176 21117 21614 21436 21992 21611 21801 20854 21839 21399 19968 19587 20704 20646 20994 20349 20867 20416 21595 20637 22812 21596 21966 21891 21966 21543 21725 21026 22058 21259 22051 21056 21576 21248 21983 21683 21600 19997 21068 20935 21549 20757 21255 21398 21373 21116 22772 21797 22568 21526 21715 21124 21945 21987 21666 21070 21012 21751 22849 21084 20615 20900 22329 22663 21360 20224 21802 21728 21625 20463 21870 22937 21355 20753 20585 21463 23040 21201 20525 21126 22450 22167 21030 21947 22304 22016 21285 22273 21872 22267 21548 22089 22335 21897 21643 22085 21735 22167 21229 22169 22185 22023 21221 21977 21873 22309 21297 22132 22031 22024 21264 22228 21831 22259 21209 22289 22119 21954 21222 22203 21703 22368 21177 22230 21991 21992 21212 22434 21543 22056 21143 22329 22176 22183 21019 22256 21624 22005 20896 21984 21884 21913 21036 21960 21785 22265 21376 21622 21261 22229 21651 21851 21193 22332 21419 21968 21105 22223 21901 22289 21142 22116 21662 21901 21069 22040 21998 21757 21210 22429 21559 21579 21347 22154 22029 21656 21454 22732 21555 20939 21634 22136 21415 20869 22197 22688 21249 20951 22865 21494 20561 21517 22098 21666 20666 22363 22547 21024 21801 23278 21193 20980 22905 21824 20985 21065 22040 21685 21532 21760 22413 21432 21877 22016 21636 21320 22222 21632 21654 21449 22040 21547 21524 21750 22279 21386 21806 22085 21888 20935 22052 21501 21985 21136 22262 21808 22051 21217 22499 21458 21631 21476 22155 21335 21724 21710 22468 21079 22086 21858 22116 20916 22208 21493 21732 21339 22258 21639 21735 21514 22474 21180 21614 21779 21913 20993 22304 21429 21634 21379 22262 21544 21632 21536 22439 21456 21888 21863 21957 21418 21773 21645 22346 21125 22240 22046 21984 21571 22444 21408 21470 21577 21938 21230 21751 21717 22066 21120 22152 21849 21739 21486 22449 21410 21280 21419 22051 22164 21079 21769 22891 21008 21201 22862 21334 20661 22824 21171 20457 21866 21675 20682 21145 22001 21515 20596 22381 22031 20779 22069 22927 20943 21504 22778 21312 21624 21888 21953 21315 21904 21735 21833 21268 22064 21842 21515 21833 22366 21590 21616 21952 21815 21077 22318 21454 21463 21551 22115 21593 21532 21627 22412 21286 21808 22057 21964 21075 22481 21433 21622 21808 22061 21014 22224 21400 21848 21292 22240 21575 21606 21703 22393 21245 21989 21811 21575 21280 22565 21360 21766 21940 22017 21170 22554 21421 21719 21831 21808 20936 22214 21206 21634 21529 21815 20865 22089 21348 21590 21569 21785 21001 21947 21683 21701 21177 22067 21546 21443 21739 22018 21251 22115 21376 21815 21584 21643 21135 21911 21258 21479 21761 20952 21440 21939 20531 14648 16070 15988 18050 17917 17358 18696 18673 17921 18880 25752 23351 23191 23208 22152 21702 18310 18648 18275 20149 20392 19101 20079 20586 19598 25869 24261 23228 22777 23049 22243 18905 20119 20136 20128 20997 20152 20811 20857 20699 24877 24208 22431 22599 22416 22153 19427 21037 20577 20841 20971 20749 20362 21632 20999 21047 23011 22631 21512 22490 21541 20129 20855 21399 20508 21602 20823 21097 21253 21373 20558 22827 21645 21774 21880 22208 20994 22385 21261 21744 21817 21761 21271 22363 21265 21869 21536 21555 21545 22101 20874 22088 21317 21427 21451 21924 21131 21952 21190 21664 21403 21544 21286 21826 20967 21808 21293 21368 21732 21701 20982 22072 21288 21310 21715 21564 21133 22698 21317 21592 22493 21042 21918 22162 20487 22248 21204 21024 21639 20741 20910 21763 20250 22364 21073 20581 22912 21086 21639 22507 20460 22185 22000 20602 22181 20941 21140 21384 21354 21552 21625 21160 22213 21211 21878 21587 21266 21568 21400 21200 21804 20997 22222 21390 21504 21914 21648 21360 22019 21129 21971 21349 21420 21429 21549 21278 21892 20982 22092 21175 21557 21731 22281 21297 22250 
20851 21853 21591 21543 21093 20709 20845 21626 22100 22665 22960 21962 21840 21555 20533 21403 22096 23130 21930 21963 21225 20656 21313 22496 23040 21479 21667 21527 21465 21719 22021 22025 21614 21442 21523 21616 22136 21824 22023 21220 21427 21384 21980 22029 21655 21472 21789 21431 21935 21818 22103 21709 21459 21358 22160 22064 21782 21469 21642 21593 22255 21520 21840 21332 21783 21799 22022 21512 21900 21319 22064 21612 21968 21432 21780 22069 22893 22560 21134 20857 21313 21883 21712 23097 22311 21552 21337 21447 21739 21564 22224 21821 22034 21561 21529 21381 21859 21707 21788 22104 21927 21607 21466 21452 21495 21563 21850 21668 22176 21875 21747 21449 21585 21273 21771 21888 21880 22037 22028 21376 21508 21412 22094 21721 22251 21695 21603 21240 21966 21648 21804 22005 22123 21528 21584 21374 22091 21744 22212 21716 21684 21224 22135 21653 22024 21927 22164 21258 21694 21344 22326 21764 22043 21336 21792 21347 21806 21840 22175 21753 21894 21417 21834 21440 22290 21786 21936 21226 21800 21271 21882 21870 22262 21703 21755 21337 21692 21325 22356 21770 21975 21237 21825 21376 14976 17801 19219 19505 20092 19323 20032 19900 20513 31750 26247 23767 22976 21788 22294 21835 22021 21998 22212 21429 21776 21229 21575 21405 22073 21516 22304 21756 21719 21200 21675 21444 21792 21795 21932 21944 22205 21521 21645 21473 21699 21311 21990 21741 22144 21584 21543 21104 21589 21152 21600 22076 22004 22720 22557 22185 21829 21016 20954 20928 21293 21168 22852 22160 22752 22009 21537 20679 21296 20705 21906 21744 21597 22888 22585 22272 21754 21020 20835 21190 22033 21617 23087 22332 22480 21746 21143 20553 21383 22188 22123 22433 21967 21846 21508 21515 21249 22164 21703 21704 21977 21973 21856 21769 21449 21431 21672 21472 21590 21937 21635 22217 21941 22073 21632 21639 21241 21643 21489 21686 21842 22016 21930 21980 21504 21525 21568 21597 21523 22124 21675 22215 21725 21626 21385 21946 21536 21889 21946 22129 21751 22022 21316 21517 21352 21877 21444 22272 21679 22295 21728 21702 21185 21941 21460 21839 21919 22144 21742 21864 21237 21640 21415 22152 21771 22152 21590 21636 21379 21693 21755 22055 21915 22021 21272 21610 21561 21760 21388 22225 21712 21969 21372 21696 21168 21554 21656 21736 21975 22203 21573 13433 17718 19650 19805 20956 20361 21321 20649 20776 20352 26579 23497 22968 22425 22501 22039 22230 21314 21529 21389 22217 21523 22296 21680 21701 21200 21920 21513 21740 21973 22190 21579 21809 21250 21586 21366 22102 21577 22388 21760 21760 21063 21853 21665 21916 22263 22304 20984 21061 21268 22519 22169 22404 21500 21096 20599 21292 22716 22664 21735 20850 21155 21808 21657 23084 22401 21823 20729 21287 21062 21457 22845 22535 21770 21083 21056 21083 21579 22955 22400 21890 21112 21110 20672 21464 22305 22250 22768 22032 21443 21244 21607 21750 21809 22074 21974 21560 21529 21540 21500 21532 22019 21897 22006 21725 21514 21360 21653 21917 21772 22043 22017 21371 21568 21455 21788 21380 22148 21778 21900 21585 21462 21312 21760 21710 21813 22016 22147 21576 21815 21206 21575 21414 22051 21527 22333 21801 22041 21488 21639 21197 21751 21278 21729 21785 22024 21917 22195 21586 21992 21324 21559 21376 21637 21457 21977 21455 22336 21740 22251 21424 21648 21229 21792 21197 21783 21413 21815 21708 22016 21848 22235 21802 22014 21289 21656 21277 21813 21333 22148 21464 22222 21749 22257 21794 22107 21380 21863 21162 21620 21187 21937 17637 20064 20608 20997 21164 21596 21399 21617 21213 28164 23570 22709 21799 21991 21549 22349 21706 22395 21842 21987 21568 21702 21267 21564 21277 21657 21216 21832 21261 21613 21955 21963 22261 22210 22583 22412 22227 22408 21736 21895 21405 21610 21082 21155 20921 20727 21099 20847 21004 21301 21171 21588 21130 21824 21101 22003 21063 22264 21482 22914 22295 23031 22483 22541 22358 22598 22307 22524 22147 21956 21881 21803 21667 21322 21578 21304 21478 21383 21446 21415 21388 21592 21376 21629 21520 21525 21800 21537 21952 21524 22062 21637 22136 21552 22171 21783 22240 21886 22135 21841 22208 21587 21783 21543 21697 21501 21546 21413 21464 21366 21608 21218 21647 21143 21809 21160 21742 21250 21742 21277 21742 21326 21597 21322 22235 21452 21778 21571 21749 21496 21749 21778 21831 21668 21897 21709 21879 21577 21850 21607 21857 21634 21797 21585 21872 21650 21883 21661 21824 21700 21832 21772 21768 21868 21786 21895 21867 21751 21877 21706 21906 21783 21993 21871 22258 21799 22217 21888 22231 21778 22164 21896 22224 21856 22202 21795 22224 21872 22185 21964 22119 21725 22170 21820 22114 21908 22137 21888 22144 21931 22101 18208 20553 21531 21556 22088 21577 22231 21632 22232 21471 24525 22460 22183 21577 21421 21466 20909 21424 21056 21396 20887 21484 20566 21452 20592 21328 20505 21076 20792 21175 21037 21191 20748 21105 21015 21224 21472 21705 21889 21629 21915 21780 22043 21595 21834 21827 21981 21992 22073 22138 22038 22145 22075 22048 22074 22016 22073 21998 21972 21901 21937 22049 21878 22091 21870 21840 21712 21752 21720 21537 21688 21392 21783 21607 21693 21392 21748 21364 21908 21264 21733 21209 21556 21357 21740 21552 21924 21652 22276 21669 22083 21817 22382 21783 22217 21552 22135 21436 22088 21437 21731 21141 21632 21308 21672 21264 21616 21147 21850 21464 21932 21681 22116 21943 22148 21813 21906 21709 21926 21720 21863 21557 21873 21350 21914 21201 21683 21216 21632 21333 21656 21282 21701 21576 21952 21718 22181 21887 22351 21721 22201 21403 22005 21416 21868 21361 21532 21239 21440 20971 22016 21781 22504 22581 22442 22674 21776 21972 21412 21146 21440 20444 21108 21329 21920 22353 23072 22016 22720 21269 21831 21056 21387 21379 20844 20976 20940 21154 22283 22611 22441 22233 21559 21816 21505 21744 21771 21484 21379 21501 21552 21853 20940 21496 21705 21520 21648 21408 21304 21608 21176 23537 21986 21944 21874 22019 21856 22272 21765 22185 21414 21782 21640 21482 21369 21597 21565 22168 21696 22127 21925 21897 21683 21799 21380 21784 21184 21693 21429 22083 21765 22193 21717 22287 21462 22120 21376 21681 21237 21622 21132 22129 21696 22168 21837 21832 21593 21825 21500 21786 21143 21754 21415 22097 21743 22420 21543 22097 21347 21818 21349 21624 21381 22017 21875 22083 21764 21701 21574 21975 21210 21521 21312 21944 21744 22353 21648 22023 21417 21671 21376 21533 21015 21878 21673 22396 22475 21912 22247 21387 20724 21272 20852 21446 22251 22999 22049 23045 21484 21914 21109 20717 20855 21484 21791 22672 22877 22004 21812 21532 20533 21072 21696 21891 22040 22065 21684 21632 21659 21369 21449 21727 22002 21957 22058 21613 21936 21612 21638 21523 21568 21505 22067 22025 21909 21798 21203 21258 21600 21357 21784 21742 22297 21612 22181 21420 21664 21429 21563 21561 22232 21893 22096 21815 21804 21288 21916 21196 21696 21685 22231 21756 22257 21434 21972 21648 21584 21256 21656 21248 22128 21821 22048 21756 21828 21219 21774 21318 21713 21831 22183 21760 22363 21264 21847 21372 21720 21491 22212 21844 21952 21604 21664 21187 21511 21488 22171 21769 22232 21655 22135 21405 21685 21358 21671 21312 22128 21988 22064 21991 21716 21261 21515 20717 21157 21648 22541 22433 23024 21240 21840 21324 20823 20834 21432 22153 22628 22544 21380 20757 21345 20692 21708 22374 23081 21689 22042 20635 20971 21414 21443 21905 22038 22192 21680 21926 21634 21525 21504 21677 21880 22023 21923 21604 21361 21515 21398 21925 21848 22275 21514 21747 21588 21526 21319 21719 21561 22044 21952 21957 21641 21867 21298 21632 21590 22232 21690 22084 21385 21607 21268 21818 21638 22144 21901 21907 21636 21776 21291 21724 21572 22092 21712 22327 21317 21888 21353 21632 21432 22211 21900 21902 21423 21862 21349 21722 21512 22264 21565 22269 21457 21527 21141 22112 21960 21954 21556 21953 21183 21871 21849 22344 21757 22053 21134 21607 21463 22167 21942 21797 21417 21639 21529 22260 21702 22084 21364 21159 20945 21728 22204 22488 22521 21393 20502 21197 21725 22967 21832 21817 21111 20887 21487 22677 22929 22101 21905 21436 20557 21280 22342 23185 21273 21350 21107 21019 21403 21979 22077 21369 21516 21360 21400 21768 22082 22080 21682 21520 21548 21657 22004 21896 22089 21529 21490 21350 21977 22029 21923 21997 21702 21252 21488 21624 22302 21587 22115 21460 21516 21252 21762 21766 17389 19056 19717 19383 20160 20434 20992 20172 20513 28328 25289 23541 22794 22037 22118 21416 21853 21877 22416 21410 21892 21248 21864 21627 22149 21760 13287 17660 19831 20272 21301 20663 21289 20656 21020 21034 27081 23956 22929 21783 22144 21781 22439 21546 21831 21417 21929 21903 22080 21625 21879 21388 22000 16488 19985 19789 20771 20821 21696 21401 21505 20697 21487 24854 23883 22045 21400 21105 22601 22735 21841 21221 21261 21447 22760 21841 21697 21056 21632 22791 18807 19601 20420 21668 22731 20865 20580 20721 22064 28453 23126 21717 21686 22108 22211 21702 21466 21393 21780 22181 21620 21533 21568 21701 22088 21752 21596 20503 21037 21781 21333 21574 21147 21931 21801 21648 23328 22285 22065 22404 21576 21519 21559 22129 21852 21895 21347 21905 21845 22080 21462 21736 21853 22039 21442 21686 21595 22266 21408 21528 21482 22141 21688 21593 21207 21833 21680 22101 21428 21804 21888 21879 21186 21696 21683 22028 21443 21870 21899 21769 21057 21766 21652 21906 21258 21977 21953 21751 21144 21767 21761 22101 21393 21957 22006 21794 21189 21724 21820 22057 21330 22016 22016 21808 21153 21561 21994 22455 21159 21356 22551 21682 20613 21527 22465 22156 20994 22055 22845 21254 20508 22084 22460 22560 21266 21672 22839 21457 20643 21169 22420 22631 21358 20993 21991 21756 21912 21524 21645 22092 21632 21381 21433 21942 22124 21588 21423 21817 21990 21616 21533 21604 22213 21472 21405 21741 21953 21478 21507 21853 22120 21552 21768 22026 21837 21325 21691 21810 22049 21399 21988 21904 21752 21193 22225 21450 21812 21152 22136 21736 21697 21458 22390 21404 21627 21776 21828 21116 21963 21660 21880 21216 22224 21802 21480 21387 22423 21428 21569 21657 21908 21175 21844 21693 22039 21270 22082 21784 21947 21374 22287 21353 21509 21760 21876 21295 21675 21916 22124 21397 21953 21949 21793 21186 22055 21567 21766 20982 22152 22043 21612 21465 22967 21350 20876 21571 22193 20996 21199 22409 22471 21175 22089 22949 20785 20839 23069 21329 20678 21477 22337 21892 21280 22310 22548 21194 21814 22880 21323 20896 22131 21652 21263 21734 21780 21752 21336 21997 22192 21689 21490 22150 21586 21408 21763 21824 21573 21496 21923 22051 21680 21811 22057 21733 21446 22283 21521 21456 21728 21837 21363 21645 21811 22086 21431 21971 21984 21803 21232 21982 21552 21697 21228 22172 21493 21603 21808 22097 21401 22073 21913 21751 21432 22400 21357 21779 21856 21864 21052 21992 21500 21648 21388 22052 21501 21700 21696 22254 21384 21905 21925 21801 21168 22298 21252 21536 21510 21906 21442 21828 21698 22244 21335 21976 21847 21703 21579 22364 21319 21620 21933 21863 21338 21651 21784 22080 21153 22224 22108 21305 22049 22720 21044 22060 22779 21287 21203 22893 21256 20774 21817 22146 21017 21218 22436 21848 20886 22745 21996 21242 22382 22247 20940 22656 22442 21385 21947 21912 21639 21860 22074 21483 21908 22061 21761 21713 22104 21634 21911 22000 21591 21555 22291 21504 21633 22089 21639 21315 22211 21392 21590 21979 21753 21526 22296 21577 21742 21968 22179 21445 22237 21392 22016 21863 21900 14239 18788 19111 20429 20333 20612 20325 21140 20354 21021 26560 24123 22759 23163 21840 13253 18521 20042 20011 21307 20569 20855 21007 21256 20585 27077 23669 22908 22081 22467 21783 18435 20128 20881 20688 21542 20797 21382 21296 21397 26800 23918 22221 22420 21879 21762 18432 20899 20800 21117 21390 21671 20754 21964 21363 21190 23808 23256 21469 22488 22692 19300 21488 22597 20920 21761 22584 21256 21792 22738 21066 23403 23117 21316 22552 22297 21143 22483 22183 21146 22453 21580 21045 21795 21553 21623 21792 21295 22072 21532 21477 22035 21575 21388 22188 21559 21578 22041 21627 21524 22123 21714 21753 22016 21835 21688 22115 21426 22145 22029 21701 21797 22153 21504 22040 21696 21616 21824 21705 21504 21958 21167 22134 21449 21699 21816 21840 21392 22344 21328 21835 21881 21862 21773 22160 21231 22089 21277 21995 21408 21638 21833 21784 21222 22279 21547 21912 21927 21687 21837 22090 21173 22064 21223 22173 21333 21633 21859 21751 21304 22226 21354 22132 21739 21612 21684 21667 21473 21785 21219 22277 21433 21664 21895 21984 21481 22293 21415 22090 21905 21420 21872 21889 20931 22286 
36404 36963 34081 33285 38624 34708 36120 34352 39332 35163 38171 38166 36624 33447 32371 41733 39493 40369 37899 38247 40288 33944 40747 43656 39287 43034 35079 33097 42396 35777 38554 38704 34464 42088 33301 33927 39748 36471 38690 40221 42368 41856 38553 38872 34837 42379 36455 42317 38203 36545 39680 35480 42463 41917 40195 39116 36133 42742 34741 33858 41345 33069 36360 41120 36288 36280 38592 32884 37145 41175 39112 34373 37875 42208 36096 36936 37848 33861 36168 40733 39348 34658 40420 43012 37263 35506 38791 33841 35816 33512 40989 42667 35895 41244 41309 36572 35729 38829 36368 35504 40213 41304 35560 38016 37751 40075 33575 35521 42543 42711 32897 42464 34032 40416 36103 36967 37168 38803 38752 41472 32983 41714 39792 35621 41266 35539 34017 40176 38342 34423 36203 38603 39997 33168 33459 41701 39751 35719 40592 35452 34834 40028 40169 34775 38449 37832 40112 40481 35420 41136 42080 35910 38892 41280 36151 41371 36637 36532 40512 36040 37206 42112 36880 42144 41580 36260 37560 40257 36302 40598 37446 37233 41366 35508 35932 41328 35343 41216 42320 36081 38293 40448 36596 41382 35555 34344 39034 32152 38506 40581 37957 36688 32152 39726 42884 37403 38400 36196 41418 36960 38600 38704 40724 42436 35986 40360 33984 41904 39480 33098 41205 36113 35484 39671 35129 42177 36186 36152 37723 37848 40855 33116 34407 42473 35428 41145 38618 35927 39689 33772 33237 38556 34010 39058 33981 39178 38640 35655 33859 40290 36704 37749 37305 36800 40921 39591 37241 39989 36101 38632 33206 34149 40498 34678 37101 35619 34100 37443 34233 40859 36032 37880 36023 39776 38792 34324 39831 42113 43536 35962 39303 32902 41548 40745 40134 43035 38609 36864 32717 32800 39937 40170 35478 35096 38216 38291 36790 35833 42359 42637 35017 42403 34191 37616 34392 40704 38033 39296 34224 34368 40320 34732 42688 35308 36582 38316 37762 38352 32648 32851 33217 33952 32880 39664 35117 40791 35789 34349 41572 38097 33100 36944 37912 39863 36069 38531 41008 33293 41232 37403 42312 41264 35360 41506 35555 35127 39563 37960 42530 37184 37792 39781 35955 36878 40391 34505 42048 40207 36119 39908 34040 34117 41464 35476 35950 39068 37712 38596 40514 34368 33442 35380 41676 41049 35339 38004 41768 35162 39304 33515 34405 35456 38280 40832 33878 29226 33173 33562 35559 37271 41399 41316 34088 35028 40944 46395 44568 38785 42989 44073 39232 41077 41108 33352 41680 41048 33271 41228 34956 35111 39653 37496 32952 35544 38169 40662 34052 36128 40119 33925 41488 39769 33920 42343 35777 35478 38464 37059 34690 37459 41505 41605 37798 38437 40466 44263 40651 42672 43347 39031 33600 40636 35952 34907 35610 35992 39360 36296 34672 39605 42592 36966 34903 40708 38584 42540 37520 33625 35660 38669 38212 38832 33997 38304 42413 37304 38924 39084 34085 42333 41792 41464 36399 38488 42420 40741 34444 35728 36233 39227 38326 33529 32960 32978 42817 33480 38400 37371 38649 35693 32821 41169 34816 37581 35929 38904 38512 41877 33681 42530 36360 41518 40108 36006 37291 33769 42408 41057 35726 35364 36365 38298 40038 33786 36372 39989 33975 41883 39187 33329 41898 36472 38816 42776 34785 39916 36107 40669 35673 36017 38500 37744 40604 33927 38218 41189 33853 41216 34598 42309 38538 42816 42048 35956 41267 42176 34592 40278 36099 39970 36292 42017 36788 35306 38261 36808 41127 36432 38792 40826 34728 40609 36592 41252 40103 42698 41242 36059 41177 36246 39696 41667 37307 39500 34372 39640 37819 32749 38007 33194 37457 39553 34153 41813 34419 40075 42885 34815 35560 36272 38530 33607 42071 35507 42698 36891 38384 33504 35029 40360 33793 40552 34838 39837 36649 40503 34571 37896 38242 41432 40834 34468 42579 41174 42757 35814 37282 42050 34392 38522 39444 37047 34976 38864 36436 37707 40960 39793 33975 38967 36445 38986 38714 38604 41409 43099 38008 41664 39574 43656 34024 42064 34552 41488 44247 40291 38034 37301 36368 34726 40986 33942 40696 42951 42071 42663 42464 42032 34104 41240 34763 32711 32861 35971 33096 37607 33005 39020 34497 39800 33408 40224 36279 40872 37587 40106 36786 40496 34035 35979 33345 34880 43026 33655 41870 42777 41927 34325 39832 34840 39266 36378 39354 35952 40109 35994 40663 36026 41224 34382 40980 41282 42710 36139 33624 35697 42824 36133 35830 36676 34703 37229 35435 37274 33784 36726 34243 36755 34230 36104 33736 36824 34453 37286 34849 36256 35073 36464 35868 35700 37047 36074 37334 37186 35973 37174 35280 37239 36143 38464 37385 41232 36517 40804 37163 41090 36040 40053 37329 40723 36915 40658 36336 40680 37127 40440 38272 39927 35767 40205 36664 39590 37462 40041 37136 39753 37948 39617 38600 32880 33047 33224 39137 33895 40960 34340 40808 43136 45541 43778 40878 33944 42120 42932 37162 41991 38384 41808 36832 42848 33242 42264 33376 40824 32358 38267 35416 39662 38348 39968 35024 38744 38001 40163 42655 35520 37031 34560 37509 35900 38912 34170 36500 36517 38414 38432 39322 40112 38942 39948 39505 38843 39344 38432 39328 38742 38212 37526 37761 38876 37312 39542 37329 36567 35155 35705 35316 33065 34798 41472 36327 34232 35124 41488 35938 41484 37536 40276 35771 39992 33549 41463 35908 33186 37364 34496 41016 34989 39224 36576 42618 36384 40812 33473 39925 42503 39560 42595 35852 39259 34240 40884 34937 40137 34233 39271 36934 42506 37984 34928 39552 38101 39959 36567 37303 35440 37596 35408 37063 33553 36909 41448 37690 39892 35143 39848 34262 41120 34752 40432 35356 33552 37602 35444 40328 37675 42389 35744 40623 42225 38868 42104 37325 41536 33417 40344 42276 37834 38340 36050 43616 34486 42951 35384 35706 38092 41984 39555 42249 42631 39145 41191 37563 42096 39591 38483 35662 40465 36880 38148 41895 41840 36352 37366 37121 39281 41517 34721 42961 41313 33869 36237 32657 35380 35852 42792 41908 43445 33575 36836 37117 42918 35544 32757 34136 41623 41067 34285 39453 44584 38608 37878 37088 38548 36809 41010 35997 40439 42224 36250 34280 42658 41975 34375 33596 40000 35076 39992 37807 37363 35021 36245 41488 36168 39491 35351 42136 39542 35908 40416 35590 41539 42844 39984 41552 35088 40314 34507 39011 39892 35074 40074 36950 36561 33962 36329 43013 36352 39319 35993 42096 39636 36064 42657 33715 39272 41520 36685 41448 34501 41513 38629 37251 39351 35803 35160 33616 38156 40069 33120 40591 37953 35634 42006 34600 38592 42183 35176 41316 33521 37776 37220 34868 42581 43812 37735 41336 42048 35009 40352 36240 42313 41568 39160 38961 39316 43016 37808 39059 34955 36251 42779 36560 34937 37536 38576 36416 33152 32340 38099 34966 37094 38743 39127 35037 34040 34658 41558 42688 36007 38460 38101 39113 34450 37507 34257 34260 32896 33216 32469 38940 38732 37553 36241 40036 40459 34100 41494 36145 35792 41472 34465 40308 42320 34818 42140 33941 33417 40741 37419 39345 36656 36295 40596 37712 39904 35072 34933 40977 36128 41191 42539 38378 34381 33516 40064 34694 39906 39818 36759 38747 36032 36455 40130 36144 41008 35450 36631 40497 35714 42341 40500 37072 41751 35574 42842 40959 36873 37783 34071 34469 39643 33112 42470 40624 36021 40868 34924 39989 42220 35292 41572 35128 40711 39860 38461 39016 38648 35388 40448 33203 34676 39320 34432 33540 42688 39258 40478 36724 41117 36106 35827 42075 40273 34823 33352 41347 35222 41223 34512 35159 42308 39920 35271 38788 33975 37476 42069 42598 37571 38811 40440 34952 37580 34262 32951 32352 34785 37040 38711 37706 34062 41346 33269 41638 37857 36792 41234 33137 35633 33730 32910 40960 35704 33509 38722 37856 38086 34508 37044 40752 34304 33769 40749 35276 39185 41832 34480 40263 36608 34361 39639 37585 37472 34309 35632 40799 35693 33497 39278 35276 41920 41318 37191 41525 34332 42021 40967 37538 37506 42392 37226 41476 35685 32727 41088 33962 41422 42660 33498 39091 39584 38100 37948 33475 37701 39992 37438 36893 41959 36304 38963 39424 34364 42546 40576 38040 36268 42072 34759 33025 41047 35408 39177 41683 39764 37222 35379 40611 43691 44388 42088 32375 39777 35732 38520 36642 36491 39100 36656 43046 35521 37888 39647 37458 42360 33216 40226 42166 40951 40784 41664 39192 38080 42053 38629 39498 41833 33216 41200 42008 35959 39173 39203 34997 32707 33176 34468 38400 37268 39435 33254 42583 41712 38497 38859 37726 38656 35292 40105 42871 34573 41569 34121 39604 42608 33249 40006 35769 35672 40028 37587 34536 40936 39360 42222 37609 39608 32280 44391 42840 44919 36864 38800 39833 42121 37221 37226 42588 42203 37392 40048 37061 34524 39920 35688 37658 33053 35840 40230 41056 34374 40624 33965 37763 38097 41432 39174 38037 36183 39709 36125 43079 33676 36559 42069 37924 37613 39140 34534 37211 41736 38583 30240 37044 35613 35109 35719 34886 41801 32911 34306 42902 37953 38416 39077 41910 39060 34483 36027 36630 40192 40656 42659 36436 36672 35063 38053 34140 36387 35024 33080 41709 34907 35904 36080 33003 34520 38779 46065 40621 35622 34961 39537 40853 35402 42547 41998 36114 40375 34413 33173 33248 35012 39203 35915 33975 32052 37977 36043 41221 33920 39266 37920 36310 34324 41920 41706 39264 42641 33929 33023 33413 39651 37027 37337 41401 37496 36834 39105 42680 35810 36955 38932 42329 35292 33992 41285 42002 33267 42594 40449 35165 33932 39942 36768 34784 39478 42248 36520 36976 37344 39657 35059 34918 38576 42425 37429 37448 35882 38199 35840 34456 37196 40386 38430 37962 36009 39140 36005 35624 39517 41832 38240 38704 36144 39745 35633 36472 39036 41219 38494 38405 36232 39288 33675 38336 43408 39868 41664 34068 34761 33337 32972 42997 40396 37634 39096 37355 40327 32365 39003 43416 34009 40204 34875 37056 42446 34074 39349 42833 35192 41532 37641 38567 36025 37376 32989 34396 39328 34261 41504 42534 38104 39927 33957 42197 36704 38432 34169 33152 33809 40613 42696 42355 36071 37866 42809 33128 36825 39706 33364 35557 38572 36888 41264 35397 36213 38814 42064 38528 37284 35811 39776 40960 42674 36573 39159 40016 35731 35023 42287 42898 42258 34763 35648 36448 39042 38274 34800 37059 39914 40848 36457 42752 42085 43210 42471 33813 34515 37248 39777 36797 35253 38833 40585 39360 36077 37987 41892 41828 41761 33096 35361 37033 41029 35171 37482 39877 42007 38096 38128 36123 39592 39216 33993 35665 37586 39984 39112 34346 42468 38850 41552 36549 33618 40327 37685 40135 42850 43804 40072 39545 38406 35463 36032 39584 41264 34436 42607 42181 37406 40455 41829 33876 39703 36503 37360 41255 36576 39911 34647 40504 35777 35852 35746 41141 38839 40448 35268 42689 40276 33940 41628 35953 36304 33674 42706 37876 39004 34848 36273 39018 35720 42296 41704 33187 42104 35586 36756 41600 34819 36288 39336 42480 38422 38258 36461 40118 38553 33376 34882 40162 40470 43168 34404 36053 39392 42018 39463 37661 36008 42103 42632 41951 36183 36723 36956 38296 38418 43169 34628 41609 39109 43296 35375 34871 41269 41774 37518 37689 36301 39345 41644 40425 33221 32640 37124 42240 36710 35044 40964 41579 38298 36986 35336 33776 42152 41427 34448 37752 37160 41321 34768 35865 39045 39394 40818 39860 41104 39027 35692 38068 39096 36754 40813 40117 37959 40320 35360 36384 39865 38038 40075 43080 37046 36480 36080 38508 40501 42795 41577 37338 34775 42972 42002 38261 37473 34544 36765 39244 43057 37623 39244 35757 35204 39432 34340 37443 38410 34136 33326 41252 32802 34027 39274 34624 40882 40922 41806 34151 38274 35955 33008 41218 33946 35670 37926 40320 42528 41464 41827 38523 37209 37346 38065 34690 38136 42304 41602 33504 40913 39323 41260 38291 45728 41385 36552 40769 36717 37194 31748 37888 37872 41108 33232 36152 37882 40293 33382 41133 36181 37897 39248 43445 36353 30567 38560 36387 34140 33159 35471 41552 40872 42060 38318 38874 41072 42903 37609 35673 30208 36317 35328 39127 41984 35184 34789 38024 41676 40032 37267 41584 43042 43797 35687 39971 42848 34639 36736 35603 34049 40087 36069 35872 38389 43270 40528 41128 33874 41399 39564 43634 40857 39488 43361 34137 38096 36246 33348 34263 35840 40935 39312 33314 42552 38990 33941 41571 40716 33836 33584 38689 34608 32825 39743 35312 35808 38272 36805 34955 39639 42224 40096 38944 35312 36125 40032 32739 38536 35029 34000 36205 35234 32410 37847 39768 40084 42636 35415 36301 36514 41522 42215 41287 36928 37294 36994 36007 39930 40629 39616 40833 38752 41898 34608 36548 35952 40112 41542 33644 37229 37792 35191 36717 39406 39769 39069 40412 40568 41452 34455 36864 35979 40773 41005 41716 40072 35960 34192 34804 34657 42471 36336 40129 41413 42538 34811 37280 38168 42875 41778 42416 39648 37458 42162 37191 37138 36992 41489 
23651 22680 24349 24373 23262 23177 23591 22247 22805 22848 23689 24143 24929 23117 23160 23040 22599 23104 24244 24482 23122 22892 23040 22578 23655 23703 23577 23241 23001 23202 23265 23704 23451 23509 23208 23067 23124 23639 23684 23284 23206 23203 22933 23576 23361 23684 22995 23040 22831 23650 23544 23372 23015 23445 22827 23524 23313 23799 22911 23185 22983 23696 23343 23323 22715 23249 23255 23784 22844 23221 22663 23768 23385 23328 22768 23209 23307 23911 22895 23225 22733 23659 23429 23360 22693 23195 23260 23837 22830 23136 23053 23655 23189 23488 22851 23888 22985 23571 22748 23543 23336 23384 22733 23375 23340 23655 22985 23229 23384 23463 22894 23197 23170 23833 22897 23111 22792 23639 23431 23329 22733 23469 23385 23708 22871 23165 23989 23305 22472 22674 23666 24633 22695 22361 22648 24210 24112 22749 22166 23690 23526 23204 22709 22992 24163 23340 22507 22636 23488 23833 23247 23399 23013 23524 23031 24008 23430 23674 23030 23381 23052 23408 23506 23856 23008 23276 23055 23509 22929 24037 23372 23485 22934 23448 22994 23488 23452 23843 22814 23264 23108 23647 23063 8505 13425 14760 14877 15460 15255 16187 16011 16506 16465 30896 26796 26087 25070 25477 24592 25141 24417 24268 23655 24297 23722 24035 23948 24256 23904 24192 23307 23629 23127 23945 23392 24247 23653 24112 23579 23612 23113 23687 23402 23686 23801 24032 23700 23674 22985 23432 22562 23862 23345 24437 23853 24419 23831 23185 22825 23128 22548 23374 23308 23345 24567 24515 23799 23448 22807 22528 23109 23457 23005 24491 23741 24706 24175 23570 22725 22941 22672 23101 24298 24119 24416 24117 23178 22890 22835 22687 22937 24081 23797 24407 23599 23097 23169 23197 23356 23138 23725 23426 23917 23594 23676 23237 23377 23127 23298 23445 23424 23717 23661 23641 23606 23242 23292 23104 23200 22503 23494 23214 23866 23537 23755 23284 23265 22995 23210 23209 23412 23542 23792 23461 23553 22883 23212 23180 23707 23283 23941 23540 23618 23003 23405 22929 23459 23266 23537 23643 23923 23297 23657 22912 23240 23059 23808 23093 24022 23440 23493 22984 23463 22889 23434 23484 23761 23361 23457 22952 23333 23017 23928 23335 23906 23168 23341 22760 24005 23133 23539 23474 23863 23223 23353 22954 23401 22919 23836 23157 23893 23456 23411 22909 23408 13923 16196 16920 17691 17682 18120 17507 18040 17884 18617 26893 26524 25227 25197 24252 24267 23671 23647 24052 24279 23964 24036 23312 23562 23413 23872 23409 24181 23533 23702 23144 23625 23192 23482 23679 23782 23671 23858 23040 23264 23268 23799 23371 24039 23448 23144 22676 23364 23983 24073 23784 23175 22716 22674 22757 24432 24196 23649 22497 23095 23706 23921 24381 24098 22869 22595 23080 23252 23042 24691 24055 23337 22417 23133 22984 23132 24441 24120 22929 22626 22913 22928 22880 24401 23959 24166 23452 22964 22964 23159 23716 23368 23730 23376 23175 22935 23277 23261 23342 23696 23637 23451 23363 22997 23129 23085 23711 23516 23691 23309 23141 22919 23814 23191 23414 23557 23778 23346 23253 23108 23274 23013 23655 23321 23786 23384 23322 22867 23305 22953 23313 23418 23670 23508 23680 22920 23257 22978 23354 22961 23616 22992 23776 23258 23672 23152 23299 22801 23378 22763 23392 22987 23344 23360 23523 23335 23769 22993 23310 22783 23227 22967 23491 22834 23784 23031 23883 23271 23792 23229 23385 22857 23239 22700 23520 22982 23334 23420 23645 23416 23708 23104 23558 22761 23283 22800 23251 22791 23364 22785 23718 13877 18152 18448 19392 19176 19631 19255 19502 19195 19853 26711 25927 24565 24433 24324 24412 23815 24008 23235 23496 23312 23354 23317 23511 23127 23635 23069 23744 23048 23922 23260 23927 23522 23607 23181 22896 22792 22774 22318 23003 22220 23042 22352 23067 22809 22904 23394 23120 24080 23521 24353 23760 24398 23908 24377 23988 24402 24119 24097 24144 23073 23257 22632 22540 22509 22424 22491 22444 22664 22245 22804 22706 23142 22884 23188 22973 23207 23079 23177 23168 23155 23328 23160 23413 23150 23455 23460 23604 23603 23581 23596 23349 23599 23452 23590 23271 23487 22959 23255 22891 23105 22891 23143 23040 23117 23095 23204 22695 23181 23447 23366 22804 23357 22818 23556 22873 23584 22920 23662 22971 23717 22999 23763 22990 23840 23040 23923 23161 23854 23175 23882 23273 23753 23234 23735 23309 23810 23261 23805 23233 23850 23225 23838 23261 23885 23161 23822 23228 23812 23269 23768 23280 23781 23268 23768 23206 23760 23176 23799 23202 23766 23168 23725 23235 23339 22717 23159 22849 23199 22769 23129 22784 23177 22800 23133 22744 23063 22809 23152 22924 23266 22739 23176 22778 23106 22860 23090 22816 23179 22920 23197 22887 19047 19891 20608 20840 21465 21052 21403 21444 21848 27855 25952 24975 25241 24199 24937 23745 24512 23389 24568 23517 24341 23021 24123 22996 23879 22809 23234 22806 22748 22877 23040 22707 22939 22257 22679 22769 22490 23267 22808 23133 22807 23025 22835 23171 22886 23172 22934 23040 23012 23072 23125 22968 22918 23092 22988 23067 23057 23264 23125 23346 23144 23440 23385 23546 23335 23644 23303 23777 23239 23784 23080 23655 23222 23809 23124 23783 23134 23711 22950 23465 22857 23397 22889 23232 22731 23193 22733 23201 22662 23138 22700 23253 22813 23357 22964 23640 23389 23722 23394 23495 23143 23509 23173 23383 22983 23280 22888 22739 22784 23494 22681 23165 22816 23356 23143 23552 23201 23931 23236 23866 23255 23885 23122 23812 23012 23618 22913 23410 22931 23286 22901 23245 22936 23067 22789 23081 22774 23207 22864 23469 23190 23627 23436 23583 23473 23303 23281 23213 22811 23186 22288 22741 22544 22931 23499 23845 23919 24512 23713 24320 22822 23427 22984 22317 22694 22623 22848 23941 23984 24100 24359 23524 24234 23173 23568 22820 22471 22865 22137 22604 23182 23355 23577 23463 23420 23388 23282 23305 23138 22931 23085 19913 21117 21628 22039 22098 22430 21967 22439 21788 22199 24026 23662 23253 23196 22905 23275 22964 23594 23342 23637 23363 23285 23086 23265 22778 23168 22703 23172 22934 23378 23233 23816 23130 23690 22756 23471 23244 23116 22673 23104 22729 23449 23202 23717 23372 23500 23088 23303 22752 23296 22541 23181 22825 23570 23176 23788 23170 23767 22817 23469 22863 23107 22665 23312 22983 23707 23271 23501 23227 23256 22775 23303 22702 23203 23184 23776 23265 23752 22958 23429 22956 23122 22693 23256 22972 23608 23392 23396 23227 23255 23084 23313 22617 22915 22697 23012 23716 24353 23629 24172 22606 22672 22693 22498 22725 23587 23367 24151 24348 23296 23319 22781 22212 22732 22478 23177 23927 24483 22873 23020 22922 22204 22733 23029 23424 23373 23680 23008 23336 23161 22960 22836 23366 23405 23488 23518 23325 23424 23111 22970 23108 22777 23237 23251 23703 23073 23361 22875 23176 22839 23127 22840 23569 23381 23470 23269 23239 22716 23107 22791 23084 23130 23780 23124 23695 22821 23260 22954 23175 22710 23412 23161 23666 23375 23415 23069 23260 22809 23276 22596 23156 23089 23787 23018 23674 22860 23158 22876 23196 22667 23508 23171 23686 23259 23314 22668 23299 22682 23306 23243 23751 22895 23432 23341 23011 22758 23078 22897 23657 23401 23444 23224 23240 22777 23329 22695 23184 23207 23739 23227 24001 22769 23198 22909 22393 22473 23061 23640 24096 24251 23385 23466 22167 21984 22580 23217 24150 23648 24000 22635 22585 22628 22710 23114 24181 24240 23525 24064 22972 22912 22781 23057 22919 23557 23495 23313 23365 22983 22784 22901 23117 23545 23138 23468 22914 23031 22811 23307 23217 23504 23337 23150 23157 23195 22753 23229 22714 23285 23246 23680 22976 23333 22540 23060 22692 23485 23332 23532 23160 23308 22646 23180 22898 23514 23232 23745 22934 23552 22840 23064 22598 23414 23140 23659 23247 23296 22759 23248 22817 23482 23168 23671 22855 23516 23310 23131 22644 23644 23351 23335 22799 23367 22684 23408 23252 23792 22852 23232 22789 23221 22800 23552 23388 23271 22884 23332 22869 23591 23162 23641 22811 23033 22631 23472 23573 23257 23033 23075 22215 22663 23202 24361 23282 23407 22859 22237 22698 24105 24180 22903 22473 22784 22476 23106 23799 24502 22917 23160 22665 22714 23217 24055 24135 22711 22407 22667 23194 23366 23362 23173 23016 22841 22972 23108 23493 23209 23405 22951 22891 22725 23436 23424 23301 23154 23209 22685 23046 23224 23604 23076 23355 23068 23040 22840 23573 23392 23277 23101 22932 22681 10357 13085 14983 14727 15613 15395 15907 16071 16613 16206 29558 26537 26137 25543 25713 24490 24731 24128 24422 24101 24532 23967 24038 23239 23837 23687 24425 13852 16509 16215 17291 17385 18373 18226 18337 17789 18426 27447 26775 25301 25521 24476 24497 24052 24667 24226 24053 23456 23896 23933 24397 23505 23661 23270 17353 18541 19016 18992 19360 19493 20357 19591 19818 28386 26311 25820 25091 24455 24104 23458 23904 24735 24985 23299 22819 23224 24613 24584 23282 22491 23668 20307 20947 19991 19907 21329 21667 21343 20738 20167 26563 25518 24869 24156 23716 23992 23838 24073 23111 23396 23556 23868 23744 23520 23131 23351 23687 20929 21285 21601 21607 22363 22173 21927 21856 22442 22297 24777 23629 23854 23772 23767 23342 23489 23319 23957 23161 23408 22965 23777 23510 23533 22849 23399 23456 23928 23132 23256 23463 23673 23178 23351 23296 24064 23085 23619 22933 23797 23501 23494 22857 23523 23256 23612 22979 23630 23463 23429 22663 23541 23057 23575 22812 23697 23225 23367 22804 23628 23144 23424 22865 23644 23467 23239 22749 23525 23171 23416 23030 23554 23429 23298 22766 23456 23275 23440 22769 23520 24103 23104 22423 23130 23984 23467 22684 23613 24328 22946 22229 23633 23363 22902 22567 23390 24403 22960 22167 23447 23853 23598 22785 23347 24412 23066 22817 22939 23511 23511 23282 22864 23271 23441 23482 23090 23175 23567 23316 23041 23123 23382 23707 23241 23050 23287 23511 22981 23150 23428 23701 23180 23288 23483 23304 22850 23224 23297 23608 22795 23586 23412 23261 22741 23817 23033 23228 22822 23751 23267 23264 22982 23968 22890 23173 23178 23465 22839 23248 23195 23538 22769 23644 23232 23458 22946 23863 22912 23201 23183 23395 22861 23281 23207 23674 22749 23740 23303 23371 22714 23753 22833 23083 23024 23485 22864 23213 23265 23616 23128 23481 23502 23244 22749 23575 23238 23460 22766 23671 23399 23399 23050 24020 22920 22671 23517 23398 22709 22729 24032 24022 22856 23278 24406 22835 22279 24039 22861 22309 23085 23945 22809 22717 23861 24576 22534 23084 24437 22789 22211 24144 22770 22438 23342 23207 23352 22892 23489 23435 23160 22987 23601 23157 23005 23046 23451 23113 23063 23405 23499 22997 23468 23491 23179 22773 23485 22963 23053 23004 23497 22817 23154 23321 23564 22902 23350 23465 23192 22786 23511 23088 23493 22653 23677 23185 23348 23104 23831 22829 23356 23493 23264 22796 23808 22861 23069 23209 23442 22757 23417 23095 23346 22713 23777 23045 23183 23191 23620 23204 23251 23296 23332 22668 23575 22948 23219 22906 23602 22950 23162 23240 23694 23084 23293 23456 23232 22820 23801 22889 23060 23195 23347 22727 23207 23241 23661 22872 23521 23612 22961 22938 24427 22576 22976 24096 22875 22196 24200 22756 22200 22834 23904 22745 22680 23937 23887 22794 23760 24156 22981 23334 24467 22746 23181 24305 22791 23360 24516 23082 23014 23646 22945 23194 23543 23073 22966 23701 22961 22955 23547 23111 22951 23695 22956 23066 23333 23276 22804 23418 23138 23121 23140 23208 22720 23516 22933 23061 23281 23306 22736 23566 22873 23107 23319 23257 22739 23852 22791 12295 14087 14813 14843 16209 15468 15974 16357 16435 31069 28705 26186 25875 25416 25184 14245 17169 17205 17893 17697 18512 18037 18380 18462 18708 27313 26996 25508 25235 25018 16774 18080 19597 19424 19809 19856 20243 19543 20519 19994 27239 25945 25518 24564 25103 24355 20128 20612 21282 20791 21456 21349 21204 21186 22006 26464 25141 25572 24012 23482 25425 21206 21712 23081 21946 21319 23520 21686 21759 23333 21975 23559 25298 23661 24049 24880 23844 23287 24928 23395 24154 24342 23170 23954 23523 23341 23582 23486 23281 23700 23264 23525 23567 23386 23516 23491 23124 23737 23246 23268 23549 23515 23044 24000 23292 23374 23694 23504 23175 24012 23075 23433 23689 23571 23205 23947 23084 23878 23397 23407 23529 23554 22971 23706 22898 23734 23099 23388 23607 23564 22901 23956 23063 23540 23543 23493 23411 23687 22899 23859 22916 23821 23266 23441 23360 23553 22954 23979 23070 23680 23448 23581 23360 23718 22939 23697 22817 23904 22999 23219 23552 23516 23119 23925 23176 23871 23249 23319 23304 23272 23371 23681 22937 23785 23034 23297 23489 23437 23047 24082 23077 23704 23898 22918 23911 
21911 22257 22265 23028 22337 22629 22106 22510 21611 22229 21904 22853 22319 23182 21851 22387 21619 22276 22057 23009 22445 22429 21659 22348 21874 22985 22247 22974 21863 22264 21384 22632 22387 22964 22185 22599 21467 22401 22208 23134 21873 22400 21604 22375 22420 22610 22340 22912 21553 22275 22257 23088 21820 22374 21637 22168 22305 22663 22503 22236 21269 22436 22616 23521 20869 21064 21548 23207 23469 21803 20759 21633 22828 23585 21504 20905 21568 23170 23736 21794 20784 21533 22945 23790 21600 20805 21557 23224 23205 21655 22068 22535 22385 21877 21970 22108 22953 22174 21882 21766 22673 22730 22569 21693 22658 22196 22339 21798 22400 22551 22327 21634 22109 22260 22970 21589 22158 21933 22652 22184 22277 21680 22797 21988 22247 21512 22765 22440 22315 21527 22390 22158 23054 21863 22141 22258 22551 21881 22183 21948 23097 21741 22221 21443 22839 22396 22390 21347 22351 22215 23143 21750 22074 21647 22831 22344 22301 21453 22867 22086 22731 21493 22481 22368 22528 21659 22097 21895 22919 22088 22362 21557 22432 22506 22291 21759 21928 22096 22976 21783 22139 21519 22511 22593 22354 21768 11687 12206 13559 14233 14734 15247 15541 29856 28788 27248 27664 26535 26297 25435 24736 24045 24284 24024 24032 24128 24080 23584 23611 22545 23207 22712 23397 22864 23597 23099 23051 22593 22620 22061 23003 22596 23000 22949 23235 22573 22880 22062 22551 22197 23153 22323 23426 22533 23123 22211 22528 21749 22531 21913 22739 22309 22792 22570 23200 22159 22611 21706 22355 22145 22882 21927 23134 22414 23081 22349 22551 21714 22426 21685 22586 22440 22984 22395 22930 21776 22303 21788 22320 21933 22965 22183 23108 22064 22292 21687 22541 21893 22612 22491 22969 22575 22912 21927 22376 21741 22427 21687 23110 22035 23233 22327 22958 22030 22259 21616 22295 21752 22439 22404 22625 22746 22807 22055 22400 21595 22176 22166 22777 22020 23257 22373 22793 21954 22226 21691 22459 22119 22673 22606 22789 21587 22196 21559 22164 21920 23458 22523 23649 22319 22096 21249 21619 20916 21807 23619 23152 23275 22625 21378 20983 21617 22288 21717 23921 23159 22599 20982 21745 21462 21872 23574 23222 22204 21672 21101 21233 21618 23445 22627 23840 22662 21932 20821 21877 22272 21967 23839 22611 22848 22287 22250 21605 22364 22149 10992 12875 14100 14735 15318 15389 16120 16401 17377 29367 29253 27733 26749 25576 25135 24401 24381 24325 24243 23752 23577 22810 23031 22261 23542 22955 23583 22973 22893 22126 22957 22368 22889 22849 23298 22563 22875 21817 22411 22425 23032 22362 23175 22217 22391 21808 22624 22513 22940 22343 22577 21703 22496 21913 23203 22249 22792 21597 22386 22016 22861 22470 22866 21776 22102 21965 22643 21895 23121 22262 22497 21689 22436 22033 22645 22461 23032 21701 22196 21641 22549 21921 23057 22217 22891 22040 22232 21554 22483 22329 22926 22278 22752 21477 22164 22020 22824 21906 23260 22133 22848 21698 22385 21708 22467 22327 22897 22231 22516 21560 22215 21550 22722 22059 23015 22364 22554 21760 22422 22028 22343 22555 22748 22398 22631 21725 22076 21760 22388 21860 23009 22353 23008 21921 21875 21562 22171 21853 22097 23392 22759 23275 23151 22023 21559 21089 20963 21600 21912 21496 23244 22484 23875 23004 23196 21829 21339 20615 21562 21642 21844 23332 22556 23699 23034 23206 22865 22112 21759 21126 20937 21353 21568 21593 23168 22088 23517 22445 22146 22372 21728 22093 21643 21749 21902 22181 21906 22513 22090 22803 22357 13705 14728 15757 16322 16967 16977 17651 17728 18642 18261 28023 26740 26039 25421 25091 23963 23735 22999 23195 22865 23154 22539 23383 22393 23328 22358 23416 22547 23415 22611 23405 22356 22587 21980 22392 21681 22366 21645 22706 22007 23051 21952 22633 22156 22695 22375 22675 22432 22826 22614 22912 22459 22871 22494 22905 22383 22905 22208 22663 21840 22211 21448 22189 21616 22139 21684 22113 21803 22233 21805 22272 21933 22413 21781 22855 21725 23047 21749 22995 21751 23279 21954 23100 22023 23271 22309 22948 22140 22629 22030 22530 21982 22435 22034 22339 21673 22094 21495 22132 21669 22263 21653 22332 21938 22336 22080 22305 22228 22281 22291 22281 22507 22400 22683 22610 23203 22737 23544 23031 23328 23249 23384 23200 23314 23255 22993 23059 22652 22976 22841 22927 21519 22115 21892 22167 21610 22387 21634 22609 21773 22311 21651 22465 21947 22326 21847 22307 21560 22285 21801 22045 21649 22042 22185 21991 22210 21924 22267 22137 22233 22017 22076 21863 21975 21766 22115 21708 21949 21715 22194 21736 22179 21543 22275 21507 22246 21581 22215 21645 22034 21550 22325 21537 22312 21514 22287 21461 22160 21481 22112 21485 22035 16024 17431 17877 18893 18939 19597 19252 20132 19761 26706 25412 25254 24122 24637 23383 24040 22972 23850 22706 23552 22613 23622 22429 23331 22279 23275 22082 23019 21816 22889 21987 23025 22016 22811 21882 22848 21917 22557 21600 22359 21840 22281 21669 22565 21460 22236 21792 22193 21732 22133 21600 22199 21826 22143 21709 22077 21568 22131 21602 22176 21632 22205 21716 22183 21859 22548 22166 22598 22200 22847 22569 22980 22156 22738 22364 22791 22665 23034 23347 22615 23399 22357 22933 21818 22298 22244 21492 21818 21229 21668 21015 21497 20605 21320 20758 21442 21798 22441 22731 23579 23086 23481 22898 23815 22029 23740 21988 23088 21575 22152 22601 21685 22096 21520 21953 21964 22349 22224 22149 22240 22587 22545 22809 22355 22837 22273 22763 22042 22800 21961 22837 21787 22433 22360 22087 21883 22081 21632 22027 21666 22359 22033 22586 22520 22875 22480 22520 22381 22369 21841 22569 21445 22256 21424 22201 21822 22657 22183 23040 22067 23071 21769 22618 22210 22235 21571 22155 21760 22704 22217 22882 22376 22752 22359 22541 22116 22353 21664 22301 21508 22149 21804 22642 22290 22873 22158 23173 21943 22921 21639 22377 18789 19592 19333 20556 20401 21426 21177 21593 21293 21408 24212 23658 22957 22885 22144 22517 21936 22503 22305 23052 22505 23124 22056 22970 22021 22016 21911 21504 21031 21525 21256 22588 22975 23080 23675 22546 22736 21703 20944 21794 20645 21223 21284 21965 22701 23646 22784 23817 21955 22365 21795 20995 21047 21293 21841 22320 22019 22386 22969 22066 22717 22007 22029 21665 21969 22057 22486 22768 22537 22533 22197 21984 22267 21621 22125 22119 22498 22352 22992 22001 22746 21711 22106 21709 22055 21874 22791 22445 22668 22368 22544 22069 22500 21595 22025 21628 22551 21985 23047 22054 22895 21623 22322 21466 22136 21437 22354 22065 22804 22432 22481 22084 22747 21471 22151 21488 22605 22009 23025 21692 22384 21835 22049 21632 22272 22127 22852 22176 22577 21979 22600 21237 22138 21872 22528 22161 23036 22139 22784 21830 22251 21765 22189 21899 22762 22457 22329 22392 22353 21755 22264 21483 22176 22121 22892 22193 23241 21733 21680 21439 21178 20950 22365 22982 23134 23584 21800 21946 21707 20729 21248 21201 22139 22876 23927 22483 23624 21831 22448 21518 20916 21193 22256 23126 23016 23540 21815 22058 21824 22071 21662 22192 22400 22597 22561 22105 21840 22044 21677 22283 22342 22792 21964 22544 21889 22199 21804 21869 21843 22542 22447 22615 22248 22280 21922 22292 21495 22267 22090 22864 22027 22861 21836 22540 21694 22130 21496 22603 22103 22880 22346 22423 22098 22352 21440 22084 22023 22999 22017 22950 21671 22272 21426 22369 21972 22707 22332 22632 22166 22226 21494 22201 21523 22695 22134 23021 21894 22779 21772 22020 21467 22537 22404 22576 22298 22274 21462 22007 21824 22745 22330 23041 22023 22678 21793 22211 21542 22072 21683 22829 22816 22445 22353 21897 21047 21387 22112 23668 22668 23384 21408 21250 20981 21233 22009 23018 23593 23048 23360 22215 20737 21240 21517 22864 22950 23693 21533 21608 21082 21333 22256 22571 22777 21998 22544 22043 21960 21910 22624 22624 22192 22016 22065 21760 22350 22327 22885 21943 22103 21738 21971 21719 22616 22547 22288 21790 21953 21792 22825 22049 22737 21457 21808 21635 22708 22405 22421 22082 22411 21369 22208 22089 23128 21661 22551 21719 22126 21946 22685 22381 22233 21525 22037 21763 22456 22180 22995 21702 22285 21545 22349 22141 22837 22199 22402 21361 22033 21912 22913 21842 23013 21481 22261 21349 22574 22265 22552 22053 22327 21516 22087 22136 22927 21959 22522 21852 21895 21702 22648 22518 22545 22138 22139 21392 22243 22240 23004 21878 22597 22280 7375 9111 12111 13796 13760 14018 13994 14464 16752 15891 30466 28209 26674 26893 27223 26976 25078 24284 23580 23100 24408 24488 24871 23226 22101 22071 23592 13098 13911 15505 15520 15902 16551 17640 17815 17895 29691 28971 28076 27605 26185 25975 24857 24423 24474 24609 24019 24028 22867 23490 23553 23850 22144 22867 13986 16401 17060 17721 17456 18327 18860 19799 18898 28537 26953 27175 25973 25408 24077 24320 23372 24430 23438 24000 23000 23184 23021 23639 22968 23134 16232 18208 17984 19205 18740 20182 20120 20524 19993 20736 26124 26576 24691 24571 23527 23799 23577 23847 22971 23242 22435 23815 22829 23589 22493 22595 22540 20088 20119 20520 20112 21557 21093 21580 20695 21541 21749 24695 23543 23468 23296 24064 22712 22968 21828 23303 23672 22761 21673 21812 23265 24000 22337 21239 22109 23343 23090 21979 21769 23943 21925 21708 21407 23169 23861 22272 21302 21619 23176 23890 21920 21376 23237 22389 22181 21871 22824 22576 22216 21888 22914 22156 21909 22217 22544 22411 22295 21984 22940 21939 22074 21780 22753 22311 22440 21835 23092 22044 22301 21691 22746 22400 22455 21770 23014 22035 22233 21625 22827 22421 22523 21648 22988 21799 22337 21745 22941 22153 22249 22080 23065 21731 22171 21571 22871 22087 22343 21825 23217 21867 22368 21690 22935 22365 21860 21531 22280 22272 23070 21895 22333 22298 22562 21810 22167 22059 23254 21802 22037 21932 22693 22071 22388 21776 22973 21781 22021 21971 22671 22088 22131 22321 22947 21772 22122 22171 22569 21640 21778 22612 23350 21504 22355 23558 22138 20691 23042 22821 22020 21091 23063 23394 21768 21264 23920 21414 20973 23117 22128 20917 21824 22643 21988 21325 22542 23799 21708 22125 22663 22219 21585 22799 22123 21913 22135 22643 22316 21996 22189 22827 22107 22176 22685 22204 21521 22664 22140 22382 21674 22624 22327 22317 21879 23029 21813 22021 22155 22722 21800 22133 22234 22743 21793 22774 22333 22441 21515 22750 21912 22338 21520 22859 22055 22239 21888 23029 21865 22293 22513 22327 21397 22380 22021 22545 21485 22813 22192 22320 22032 22940 21710 22323 22586 22389 21357 22601 22068 22486 21499 22618 22381 22651 21521 22953 21833 22125 22080 22641 21671 22118 22296 22839 21743 22507 22489 22100 21668 23025 21772 22065 22171 22432 21684 21849 22344 23202 21495 21540 22931 22120 20710 22622 22483 21652 21275 23195 21975 21312 22828 23169 21342 22640 23635 21711 21386 23846 21035 21068 23303 21920 20661 23183 22043 20987 22087 22111 22528 21783 22592 22616 22155 22072 22807 22248 21975 22635 22200 21675 22668 22260 22516 21785 22721 22313 22011 22208 22759 21907 22337 22401 22483 21376 22676 22002 22088 21634 22688 22048 22101 22090 22510 21560 22829 21975 22184 22135 22905 21530 22285 22433 22336 21422 22743 21921 22128 21692 22656 21698 22293 22001 22488 21591 22860 21741 22258 22289 22628 21559 22787 22190 22143 22131 22842 21415 22875 22122 22273 22169 22704 21428 22692 22455 22389 21927 22930 21778 22328 22516 21870 21816 23007 21955 22539 22439 22252 21943 22976 21712 22417 23088 21961 22195 23441 21227 22983 22804 8327 11791 13285 12288 14888 15857 14468 15798 16960 30137 30277 29789 26838 26304 27539 12962 14839 17296 16349 15904 19041 18150 17619 19136 30303 29557 28839 27529 26007 25847 16401 16903 17713 18628 18496 19592 19451 19583 19915 20304 28062 28103 26421 25727 25344 19141 18440 19688 19940 20298 20245 21159 20415 21091 21045 27351 25568 26108 24798 24461 24154 21547 20675 22221 21556 21671 21944 22486 21259 22516 24848 24583 24170 24204 22984 24099 23062 23288 23076 23303 22691 23419 22292 23382 22455 22742 23047 23110 22054 23648 22172 22801 22864 22808 22233 23479 22349 22852 22844 22535 22389 23268 22206 23045 22645 22410 22660 23009 21982 23066 22557 22332 22599 22909 21436 23031 21828 22247 22468 21451 22907 22232 20812 24071 22368 21555 23913 21997 22595 24013 21761 22926 23094 21463 23136 21639 22119 22364 20743 23543 22007 21500 23680 22487 21729 23247 22251 22505 22625 21782 22680 22000 22737 22138 22089 22723 22610 22373 22944 22005 22745 22280 22241 22468 22269 22193 22480 21672 23117 21946 22248 22653 22677 22144 22937 21779 22953 22217 22120 22415 22547 21776 22612 21496 22776 
