# Supplementary material for: An Active Feature Selection Strategy for DWT in Artificial Taste
Source: Hindawi journal article supplement (doi:10.1155/2018/9709505), 2018-01-01
Supplement: f1 [file 9709505.f1.zip › oolongTea-med-1.txt]

43488 43480 42796 38902 46 3713 13487 16699 19757 20088 21167 20520 21463 20935 21986 21633 22801 21514 22465 21660 22309 22069 22896 22193 22640 21485 22944 22255 23136 21897 22592 21761 23118 22461 22820 21871 22512 22364 23226 22198 22722 21677 22961 22432 23221 22301 22647 22054 23432 22048 22741 21815 23167 22649 22240 21935 23040 22433 22885 21997 23018 22916 22922 21993 22680 22620 23180 22174 22868 22805 22840 22121 22599 22597 23386 22044 22493 23021 22884 21941 22063 23073 23726 21844 21756 23177 22805 21642 21916 23208 23488 21540 22823 23911 22225 21672 23603 22340 21772 22451 23146 23069 21909 23168 23866 21969 22668 23863 22262 22068 24085 21767 21917 23296 22451 22576 22837 23006 22240 22951 22720 22793 22401 23065 22529 22535 22784 22901 22190 23121 22681 22586 22825 23151 22286 23122 22785 22742 22528 23431 22315 22999 22896 22716 22426 23585 22294 22920 22865 22826 22484 23528 22335 22862 22775 23124 22221 23608 21880 22864 22683 22736 22180 23642 22209 22844 22657 23484 22129 23621 22616 22992 22900 23063 22255 23591 22246 22865 22807 22528 22067 23653 22137 23173 10263 16245 16907 19015 18248 19856 18977 20266 19638 20357 30323 27080 24459 24422 23445 23852 22744 23752 22400 23783 22631 23052 22801 23232 22292 23483 22509 23057 23048 23238 22648 23384 22199 23451 22428 22823 22640 22904 22407 23017 22048 23491 22408 22801 22956 22874 22691 23249 21831 23248 22624 22612 22663 22240 21972 22933 21603 23595 22277 21765 23845 22391 22535 23868 21582 23387 22285 22155 22774 21733 22978 22462 21469 24050 22043 22977 23431 21973 23147 22164 22569 22680 21472 23776 22489 22438 23785 22016 23288 22684 22682 22656 22592 22801 22913 22504 23428 22196 23249 22569 22617 22836 22636 22829 22775 22320 23288 22263 23145 22296 23155 22361 22713 22888 22701 22647 23277 22110 23012 22273 23234 22349 22949 22680 22760 22634 23125 22256 22945 21943 23537 22118 23249 22801 22721 22529 23159 22228 22949 21936 23546 22032 23386 22343 22967 22368 22762 22693 22988 22277 23406 21910 23357 21975 23355 22178 23049 22759 22748 22600 22945 22569 22984 22291 23555 21762 23437 22193 23096 22176 22855 22736 23041 22476 23146 22160 22908 22094 23447 22177 23346 22300 22829 22298 22784 22640 23043 22357 23392 21933 23164 21906 18391 18924 20807 20370 21493 20680 21318 20912 21444 33028 25751 24304 23893 22833 23852 22609 23618 22574 23356 22477 22909 22986 22702 22724 22956 22423 22932 22420 23525 21840 23219 22054 23849 22353 23270 22821 22330 22673 21852 23819 22327 22932 23040 22553 22476 21569 24124 21696 23482 22106 22871 22049 22192 23936 22198 23164 22356 22686 22358 22086 23895 21591 23191 21497 24013 22267 22503 23552 22007 22858 21541 23591 22038 22744 22941 22412 22548 22503 22852 22823 22419 23327 22117 22951 22144 23281 22393 22736 22903 22500 22646 22568 22804 22692 22582 23195 22050 23111 22060 23304 22232 23067 22630 22553 22491 22573 22862 22768 22407 23317 22124 23025 22011 23431 22224 23156 22080 23331 22232 22950 22809 22601 22456 22768 22470 22879 22343 23384 22041 23047 21925 23521 22212 23320 22287 23222 22264 22766 22714 22985 22388 23058 22501 23062 22295 23264 22085 22979 22050 23557 21976 23126 21883 23272 22208 23172 22451 22913 22145 23076 22528 22823 22154 22852 22660 22796 22502 22823 22657 22669 22276 23286 22207 22987 21981 23474 22031 23084 21986 23481 22162 23229 22097 23396 22584 23292 22339 23127 22110 23140 22455 15765 19117 21118 21084 21660 21036 21928 21709 21901 21440 26830 24297 23692 22875 23122 23201 22941 22550 22923 22993 22817 22519 22829 22993 22716 22648 22618 22971 22681 22672 22679 22894 22668 22511 22581 22924 22584 22675 22582 22927 22661 22659 22634 22872 22807 22636 22484 23099 22388 22757 22649 22784 22852 22744 22951 22672 22713 22792 22684 22966 22373 22910 23229 22169 22848 22889 22359 23289 22274 23047 21732 23761 22000 22936 21675 23660 21991 22912 21638 23734 21901 22234 22642 22646 23110 22088 23143 22406 23552 22037 23205 21459 24032 21673 22464 22049 22883 22908 22295 23172 21728 23840 21770 22696 22033 22919 23113 21940 23277 21974 23076 22455 22441 22837 22493 23286 22200 23056 22017 23255 22377 23202 22713 22621 22896 22586 22368 22887 22754 22941 22228 23052 22180 23290 22264 22725 22661 22756 22976 22582 22487 22919 22395 23337 22118 22884 22373 22833 22958 22497 22381 22997 22199 23453 22098 22806 22598 22624 22885 22760 22502 23117 22064 23272 22554 22722 22548 22732 22383 23475 21989 23012 22289 23048 22744 22632 22200 23143 22247 23457 22055 22928 22448 22827 22822 22692 22194 23274 21876 23384 22352 22839 20022 21608 21607 22435 21344 22490 21596 22446 22128 27408 23339 23792 22183 23782 22311 23080 22560 22744 22663 23220 22311 23256 22154 23216 22639 22855 22240 23076 22175 23518 21912 23040 22363 22990 22656 22881 21989 23379 21792 23623 22113 22748 22467 22741 22747 22984 21876 23306 22016 23229 22695 22688 22208 23187 22007 23417 22370 22874 22500 22645 22695 23112 22008 23212 22117 23041 22729 22725 22000 23158 22074 23534 21850 23040 22488 22717 22466 23383 22095 22969 22404 22747 22824 22956 22208 23141 22016 23173 22612 22803 22377 22876 22224 23462 22052 22417 22560 22702 22616 22912 22215 22984 22369 22576 22868 23139 21944 22839 22530 22610 22763 22993 22016 22857 22570 22631 22788 22967 22135 22969 22430 22518 22877 22834 22375 23020 22420 22669 22984 22535 22165 23239 21681 23268 23144 21888 22257 23252 21596 22976 23417 21778 21965 23325 21352 23035 23664 21774 22263 23204 21369 23852 22615 22161 22554 22740 21423 23832 22525 21894 22685 21788 22405 23856 21614 22447 22854 21723 23477 22582 21916 22856 22493 22592 23553 21725 22245 23194 21317 23727 22703 22189 22709 22664 21472 24090 21488 22208 23189 21421 23408 20845 21944 21899 22684 21737 22816 22459 22339 22075 22848 22944 23544 22551 22853 22779 22660 22643 23253 22149 22682 22797 22471 22824 23250 22268 22695 22586 22488 22848 23126 22128 22899 22503 22521 22860 22929 22195 23111 22104 23111 22701 22648 22231 23031 22225 23176 22588 22647 22170 23164 22027 23296 22473 22791 22435 22720 22528 23348 21963 22820 22551 22701 22859 22896 22231 23225 21972 23188 22715 22704 22211 23191 21929 23319 22396 22834 22211 23120 22219 23488 21825 22985 22397 22769 22301 23467 21783 23033 22421 22739 22614 22988 22107 23092 22297 22709 22597 23297 21922 23040 22358 22756 22658 23165 22020 23054 22299 22972 22730 22789 21984 23280 22036 22932 22663 22868 22240 23191 22173 22954 22742 22900 22208 23097 22279 22718 22813 22800 22105 23056 22148 22838 22731 22821 22197 23174 22082 22983 22673 23040 22615 23158 22025 22976 22589 23232 21937 22936 22293 22805 22327 23383 22001 22869 22423 22660 22339 23400 22063 22711 22336 23172 21913 23053 22826 22833 22059 22820 22632 22485 22652 23384 22066 22741 22354 23072 21923 23005 22804 22852 22152 22945 22528 22688 22236 23362 21983 22592 22459 23040 21960 23111 22913 22544 22472 23200 22252 22256 23193 23322 21504 22611 22882 21999 22071 24096 22535 22176 22517 23090 21264 22817 23904 22695 21597 22321 22849 23194 21555 21751 23305 24082 22243 21682 22192 23278 22519 21468 21808 23568 23777 22898 21270 22291 22436 23344 21945 21421 22088 23947 23537 21861 21796 22357 23142 22336 21303 23099 23844 22968 21495 22162 22355 23205 21602 21622 23290 23086 22832 22004 22912 22389 23005 22240 22416 22612 23232 22355 22689 22378 23127 22401 22368 22592 23304 22785 22321 22792 22932 22532 22439 22439 23224 22784 22401 22225 22887 22616 22356 22656 23174 22312 22665 22435 23098 22296 22547 22642 23561 22144 22735 22635 23060 22371 22509 22678 23445 22488 22552 22140 23086 22320 22663 22081 23611 21975 22981 22369 23204 22014 22912 22886 23016 21952 23072 22392 22816 22204 23634 22145 22803 22242 23063 21764 23180 22743 22633 21676 23209 22054 23084 22656 22752 22057 23408 21903 23208 22582 22561 22112 23309 21687 23500 22319 22961 22389 23050 22230 23536 21697 23057 22122 22896 22596 22618 22140 23224 21814 23549 21916 23104 22288 22764 22656 22732 22069 23300 21915 23635 21679 23175 21973 23142 22436 22716 22521 22557 22698 22643 22038 23150 22247 23275 22072 23148 21934 23555 21677 23185 21849 23444 22208 23046 22285 23012 22542 22951 22373 22832 22717 14497 17834 19282 19502 20441 19017 21033 19770 21240 41096 27904 24226 24896 23207 23600 23162 23319 22561 22949 22871 22995 22706 22575 23216 23067 22721 23303 17351 20131 20137 21897 20545 21901 21111 21945 21206 31983 25879 24240 23449 23475 22478 23384 22245 23996 22545 22745 23857 22308 22983 23473 21633 23060 9796 20374 20600 20983 22548 20513 22084 21015 21832 21680 27196 25682 22758 22545 24192 22380 23104 23460 21670 23375 22115 22880 22625 22109 22919 22599 21365 17738 20210 21337 23040 21206 22564 22841 20934 22453 23149 24156 24016 23436 21795 23575 22774 21479 23389 21876 22791 22453 22697 22578 22953 22205 22979 22429 20367 22120 22425 21711 23012 22231 22127 22628 22545 21912 23969 22829 22695 22736 22952 22216 23228 22528 22585 22888 22898 21957 23480 22196 22680 22860 22802 22096 23433 22377 22624 22667 23207 21860 23048 22608 22706 22237 23066 22465 22757 22408 23336 21908 23241 22600 22712 22364 23412 22237 22932 22790 23063 22128 23405 22306 22698 22384 23118 22029 22823 22424 23028 21797 23410 22260 22752 22384 23597 22012 22978 22720 22968 21824 23300 22208 22738 22134 23287 22376 22715 22377 23612 22066 22951 22439 23177 21801 23063 22413 23313 21808 23256 22650 22885 22111 23509 22146 22944 21920 23210 22624 22784 22263 23434 22643 22752 22390 23097 22045 22698 22477 23219 21883 22917 22713 22984 21824 23117 22390 22758 21984 23335 22487 22695 22293 23575 22353 22685 22765 22819 21961 22931 22400 23092 21873 23011 22923 23263 21991 23348 22314 22848 22007 23122 22818 22812 22144 23382 22352 22426 21963 23192 22561 22384 22359 23517 22279 22441 22758 23061 22074 22029 22913 23571 21179 22881 24098 22416 20928 22511 22688 22723 21248 23063 23935 22311 20962 23363 22595 22693 21166 22240 24312 21664 20994 22490 22906 22771 21351 23111 24215 22093 21203 21996 23106 23783 21916 21770 23911 22400 21232 22060 23303 22882 22699 22289 23280 22264 22726 22030 22903 22878 22816 22205 22807 22720 23005 22412 22453 22796 22918 22668 22666 22137 22958 22386 23072 22301 22791 22765 22888 22540 22614 22087 22887 22660 23286 22440 22388 22203 23040 22660 22787 21909 23220 22445 23124 22101 22677 22570 23017 22551 22976 22016 22982 22390 23455 22233 22660 22247 23279 22582 22666 21764 22820 22411 23640 22257 23244 22028 22808 22480 23202 22560 23046 21880 22813 22476 23566 22128 22926 21772 23121 22388 23361 22450 23040 21821 22658 22295 23459 22254 23260 22128 22547 22024 22716 22618 23081 22695 22882 21870 22688 22218 23488 22228 23427 22071 22624 21875 23179 22695 23101 22503 22832 21964 22603 22240 23305 22441 23139 22137 22512 22170 23129 22884 22968 22464 22849 22025 22624 22355 23172 22555 23369 22279 22790 22023 22834 22252 23153 23201 22864 22597 22295 21485 22023 22554 23815 22749 23777 22100 21880 21636 21814 22216 23221 23778 23107 23738 22267 21751 21813 21574 22309 22952 23848 22785 23651 22098 21962 22002 21489 21625 22149 22566 23277 23770 23052 23764 22420 22897 22321 22720 22096 22574 21944 22541 22128 22400 22089 22471 22088 22629 22465 22827 22678 5656 17348 19347 19890 20289 20241 20484 20236 21029 20035 30570 25148 24408 23184 23687 22883 17547 19751 21466 20924 22151 21209 22374 21267 22321 33589 26437 23776 24136 22688 23552 16691 21226 20979 22087 21422 22278 21384 22169 21303 22054 24925 23808 22552 23043 22232 16758 20547 22132 21444 22534 21784 22902 22094 22828 22305 26086 23495 23710 22877 23592 22745 22288 22103 23078 22471 22966 22704 22994 22505 23203 24743 23929 22994 23533 22858 23444 22886 23339 22760 23100 22736 23041 22854 23020 22779 23104 22856 23105 22794 22932 22778 22817 22583 22820 22665 22784 22553 22791 22697 22875 22800 22855 22857 22778 22737 22812 23005 22692 22964 22569 23079 22389 22638 22741 22336 22706 21945 22203 21608 21972 21262 21802 21452 21773 21378 21849 21459 22145 22565 22322 23182 22460 23549 22685 23789 23046 23813 23392 23212 22930 22819 22586 22626 22111 22615 22133 22099 22615 22784 22862 22861 23076 23031 22752 23044 22504 22713 22066 22577 22116 22550 21984 22586 22163 22645 22457 22897 22192 23279 22309 23414 22458 23472 22502 23339 22544 23160 22440 22903 22204 22641 21903 22560 21829 
21976 22037 21815 21159 22336 21504 21341 22123 21769 20983 22253 21776 20919 21719 23173 21201 21519 23087 22240 20868 22944 22304 21184 21433 22200 21965 20801 22454 22147 22181 21371 22476 22015 21753 22021 22325 21677 21361 21536 22229 21058 21031 20760 21286 21441 21324 21172 21073 21276 21877 21108 21101 21063 21639 21481 21463 21031 21948 20903 21235 20846 21633 21515 21682 20812 21737 21159 21514 20594 21627 21576 21561 20736 21393 21152 21894 20756 21714 21529 21632 20714 21722 21172 21564 20745 21736 21511 21224 20718 21933 21047 21411 20967 21776 21206 21341 21204 22028 20926 21495 21504 21696 20773 21680 21275 21658 20833 21856 21056 21398 21417 21903 20869 21737 21671 21580 21318 22044 21408 21446 21620 21684 20889 22161 20996 21321 21424 21676 20907 21808 21271 21288 21550 21720 21186 21450 21328 21511 21116 21873 21377 21303 21594 21732 20987 21835 21521 21295 21564 21652 20984 22132 22609 21415 22319 22538 20933 22261 22731 21233 22214 22108 20679 22115 22330 20930 22338 22448 20694 22200 22165 20849 22151 22222 20702 22089 22404 20940 21991 22446 20680 22304 21650 21302 1252 13688 14066 14720 13800 15963 15157 15087 16493 15845 26169 24839 23950 22785 23399 22362 22309 22616 21941 21981 22627 21797 22173 22320 21830 21841 22471 21591 22456 21946 22120 22147 22156 22005 23012 22036 23165 22060 22336 22653 22362 22306 22813 21677 22663 22044 22348 21893 22065 22231 22295 21607 22841 21472 22240 22264 22458 21863 22816 21457 22704 21711 22108 21786 21973 22009 21975 21440 22779 21652 22353 22320 21271 21248 21738 21050 21719 20865 22140 21479 21736 21587 21696 21281 22055 20987 21865 21211 21803 21191 21408 21760 21680 21385 22004 20883 21982 20929 22160 21139 21312 21777 21509 21218 22185 20891 21958 21109 21932 21299 21647 21671 21402 21605 21475 21624 21811 21128 22113 21599 21876 21831 21415 21600 21596 21649 21696 21339 22373 21329 22127 21636 21385 21824 21769 21636 21713 21002 22990 21015 22296 21921 21824 21542 20894 23042 21494 22132 22122 20912 22394 20853 22581 21697 21700 22552 20996 22144 21083 22291 21747 21527 22484 20773 22082 20686 21720 21418 20747 22960 21357 21923 22092 21273 21737 21527 22214 21710 21937 22209 21409 21995 21259 22490 21375 22096 21918 21719 21626 21627 22093 12623 8533 12012 13568 14231 14834 15930 18785 19169 18496 26457 27036 25888 24907 23748 23456 23093 22961 22825 22334 23168 21728 22817 21678 22947 21788 22396 22377 22044 21985 22065 22237 22343 22100 22318 21888 22295 21472 22933 21565 22583 21655 22388 21632 22245 22107 22022 21879 22040 22029 22119 21784 22608 21355 22472 21624 22399 21708 22205 22093 22016 21790 21992 22121 22108 21975 22336 21529 22235 21430 22728 21537 22409 21884 22068 21892 21777 22239 22139 21809 22491 21424 22312 21338 22675 21673 22546 21912 22023 21664 21988 22104 22285 21817 22371 21718 22164 21440 22569 21651 22168 21947 22033 21767 21850 22212 21904 22019 22516 21461 22099 21431 22640 21521 22385 21526 22540 21390 22088 21948 21828 21925 21905 22091 21496 21666 22625 21255 22216 21165 22901 21629 22478 21867 21839 21692 21711 23033 21460 22445 21730 22102 21655 21629 22831 20969 22071 20908 23271 21093 22476 21013 23011 21398 21989 22666 21269 21854 21108 23056 21079 21969 20965 23101 21051 22184 21568 22176 21349 21968 22394 21232 21769 20940 23143 21012 22112 20828 21780 21229 21427 21345 21656 21533 21402 21763 21323 21515 21218 21911 21052 21577 17401 19136 18647 19427 19160 20137 19501 19978 19537 20471 23117 22967 21836 22785 21426 22108 21215 22389 21029 21997 21040 22296 21030 21861 21061 22125 21115 22039 20966 22213 21046 21847 21063 22099 20979 21862 20901 22118 21085 22016 21169 22055 21159 21888 21313 22035 21106 21923 20891 21936 21205 21893 21314 21789 21124 21849 21328 21752 21275 21773 21272 21856 21201 21794 21370 21880 21207 22023 21137 22224 21238 22048 21157 22400 21361 22263 21209 22392 21200 22150 21182 22314 21227 21753 21544 22074 21523 21998 21600 21890 21829 21836 21570 21605 21810 21824 21241 22132 21372 22345 21353 22049 21096 22510 21137 21834 21543 21779 21868 21683 21493 21591 22032 21655 21266 22052 21394 22541 21132 21920 21464 22212 21616 21809 21552 21675 21541 21574 21262 21760 21379 22119 21040 22056 20899 22189 21303 21682 21632 21467 21851 21591 21524 21994 21101 22252 21196 21536 21665 21460 21841 21740 21252 21937 21077 22145 21383 21867 21575 21436 21714 21936 21429 21846 21490 21696 21877 21461 21289 21973 21176 22207 21191 21676 21617 21437 21952 21798 21261 22003 21199 22272 20958 21392 21807 21104 22154 21851 20998 21846 21131 18279 20594 19235 19893 20348 19863 21879 19831 20298 21217 22137 23416 22007 21537 22362 20870 22637 22119 21050 21690 21661 21607 22899 20855 21700 21914 21163 23186 21184 21458 22501 20755 23091 21197 22023 22557 20832 22771 21745 21343 22407 21015 22065 22645 21049 22178 21051 22163 22816 20909 21638 22134 20929 23100 21876 21676 21863 21877 22096 22253 21508 22132 21570 22016 22154 21799 21508 22253 21377 22304 21511 22213 21925 21549 21907 22100 21309 21864 21821 21548 22181 21770 21521 21976 21568 21895 22200 21581 21680 21948 21424 22388 21383 21848 21830 21707 21702 22374 21165 22129 21488 21869 22105 21796 21765 21975 21744 21760 22112 21941 21433 22073 21669 21677 22165 22038 21613 22079 21563 21839 21952 21941 21414 22199 21328 22017 21965 21847 21923 22133 21356 21943 21878 21654 21467 22253 21133 22386 21879 21697 21464 22259 21275 22245 21921 21699 21293 22405 21118 22595 21578 21776 21569 21915 21332 22437 21379 21922 21595 22071 21255 22488 21164 21804 21752 21712 21888 22075 21322 22146 21478 21928 21910 22048 21257 22389 21090 22456 21575 21888 21419 22112 21308 22472 21532 21959 21580 21786 21863 22227 21272 21921 20194 20457 21076 21449 20420 21297 20993 21191 21136 23788 21959 22455 21513 22220 22088 21760 21361 22292 21142 22371 21665 21767 21477 22255 21163 22316 21699 21689 21473 22005 21271 22321 21440 21712 21680 21752 21745 22288 21253 21792 21804 21674 21991 22157 21425 21965 21760 21656 22023 22043 21407 22072 21620 21987 22023 21556 21536 22199 21334 22341 21842 21918 21849 21837 21592 22427 20971 21873 21907 21353 22464 21952 21088 22035 21543 21383 22909 21399 21314 22439 20663 22808 22003 21103 21445 22157 20710 23001 21963 21281 22155 21097 21452 23091 21101 21481 21911 21669 21133 23132 21327 21360 21878 21660 20992 23116 21315 21480 22445 20925 21935 22833 20815 21504 22302 20966 21928 23157 20906 21607 22215 21069 21735 23040 20836 21750 22256 21403 22075 22093 21774 21632 22291 21316 22039 22060 21664 21624 22077 21676 22021 22240 21678 21627 22070 21745 21592 22123 22195 21400 21815 22069 21661 21851 22209 21300 21958 21945 21734 21589 22515 21719 21788 21616 22231 21533 21874 21975 22444 21433 22139 21946 21772 21636 22569 21715 21849 21636 22280 21543 21811 21984 22432 21194 22123 21829 21738 21718 22496 21696 21717 21481 22294 21361 22119 21939 21895 21525 22107 21685 21709 21831 22453 21177 22038 21634 22060 21531 22645 21664 21778 21516 22313 21529 21879 21674 22593 21804 21891 21397 22000 21723 22157 21399 22564 21989 22373 21261 21932 21529 22257 21616 21751 21498 22609 21911 22157 21142 22176 21473 22399 21460 21877 21909 22619 21436 21939 21587 22338 21582 21882 21302 22638 21789 21753 21408 21931 21957 21937 21450 22089 22151 22580 21498 21978 21534 22387 21199 22048 21739 22624 21280 21980 21383 22422 21802 21832 21737 22508 21707 21611 21815 22195 21849 21689 21772 22701 21603 21655 21520 22275 21739 21771 22177 22253 21495 21978 21782 22348 21521 21648 21638 22587 21486 21731 21828 22296 21633 21843 21625 22586 21684 21463 21721 22375 21465 21969 22272 22489 21088 22007 21773 21987 21486 22479 21893 21405 21704 22515 21463 21584 22872 21700 21113 21984 22184 21156 22455 22832 20736 21696 22362 20928 21964 22679 20976 21820 22087 20832 23005 21905 21145 22343 21388 21486 23200 21031 21463 22669 20772 23180 21049 21703 22297 20937 22538 22327 21402 22451 20822 22807 21991 21511 22391 20814 22738 22141 21495 22360 20811 23254 20872 21943 21504 21863 22578 21318 22133 21341 22461 21597 22057 21773 22019 21626 22119 21932 21596 22265 21592 21721 21961 22007 21985 21481 21947 21587 22169 21399 22045 4776 9769 10588 12199 12541 13833 13626 14280 14529 27184 31104 27425 26004 25226 23754 23752 22754 23623 22263 22736 22038 23024 21752 22055 21223 22064 12172 9365 13214 14779 15781 16448 16891 17182 16861 18176 34245 29884 26150 25480 23725 23478 23424 22752 22640 22880 21861 22951 21745 22731 21965 22279 22390 7447 13327 16788 16780 18524 19558 20931 19900 20640 20323 24117 23907 23789 22213 22987 21963 22601 21916 22133 22154 22065 21651 22667 21456 22233 22196 22035 18290 19937 19237 20593 19788 20817 20049 20435 20272 20981 22970 23413 22275 22035 22287 22315 21175 22909 21939 22211 22153 22134 21408 22637 21721 21953 22171 20558 20432 21720 20389 21527 21273 21428 20753 22095 22775 22797 22396 22208 21646 22765 21449 22150 22108 21880 21605 22578 21332 22200 22021 21904 21597 22589 21505 22092 22187 21948 21632 22580 21591 21965 22183 22190 21314 22453 21637 21542 21760 22121 21340 21958 21753 22005 21387 22368 21717 21796 22053 22503 21173 22278 22683 21865 21456 23041 22030 21175 22513 21989 20879 22267 21760 20992 21589 22513 22209 20917 22097 23146 21138 21661 23132 22128 20697 22464 21783 21088 21172 22549 22441 20855 21179 23276 21521 20816 22247 21947 21095 21373 22320 22337 20885 22264 23024 21753 20728 22037 22374 21578 21122 21907 22342 21581 21984 22088 22077 21465 22156 21563 21817 21184 22212 22169 21943 21477 22462 21687 21537 21914 22004 21552 21913 21873 22389 21352 22229 22174 22035 21376 22483 21585 21795 21270 22353 21926 21769 21681 22487 21697 21533 21653 22199 21504 21863 21607 22551 21428 21700 21952 22157 21388 21837 21628 22492 21191 22105 21938 21696 21040 22344 21609 21940 21207 22327 22002 22341 20939 22881 21373 21996 21329 22327 21701 21671 21607 22891 21365 22269 20811 22700 22009 22226 21085 22574 21577 21742 21403 22447 21654 22003 21105 22425 21687 22026 21215 22282 22023 22284 21230 22519 21603 21995 21229 22151 22166 21904 21258 21843 21731 22464 21457 21856 21888 22194 21685 21803 21523 22683 21523 22224 21424 21920 22029 22125 21484 21609 21568 22475 21647 22157 21424 21835 21687 22191 21958 21751 21274 22192 21753 22304 21401 21943 22048 22088 21623 21789 21509 22419 21767 22181 21091 21331 21591 22375 22495 21504 20834 22080 22237 22651 21449 20763 21367 22403 22801 22145 21753 21057 21194 22356 22064 22486 21297 20880 21408 22479 22986 21557 21210 20976 21144 22058 22319 22999 21429 21035 20840 21908 22730 22296 22823 21582 21755 21419 21935 21860 22201 21928 21911 21319 21613 21664 22364 21733 22279 21648 21562 21506 21960 22072 22061 22016 22016 21402 21673 21681 22491 21614 22329 21547 21729 21511 22159 22008 22131 21704 21901 21369 21721 21524 22227 21816 22506 21465 22024 21299 21855 21696 22240 21913 22088 21623 21923 21210 21902 21717 22621 21617 22597 21298 21964 21089 21831 21516 22210 21847 22256 22151 21952 21391 21911 21329 21924 21697 22705 21504 22520 21519 22233 21440 21688 21239 21904 21404 22371 21863 22452 21975 22093 21958 21946 21718 21703 21231 22151 21479 21989 21257 21988 21189 21812 21065 21729 21321 67 8215 11997 12536 14183 13841 15099 14385 15499 14798 34587 28785 23205 22401 22516 21897 14144 17772 18823 18775 19478 19437 19834 19646 19993 27224 27147 25816 24568 24475 23398 16032 17429 19196 18861 19884 19201 19852 19361 19643 29013 25946 24314 23369 23260 22286 16678 17555 18794 18787 19382 19549 19729 19776 20151 20267 25090 23053 22661 22138 21959 18763 19795 20477 20823 21393 21221 21816 21437 21627 21074 23963 22906 22785 22444 22521 22416 22531 22351 22502 22466 22444 22299 22419 22368 22503 22201 22483 22089 22550 22272 22305 22295 22268 22203 22400 22162 22385 22241 22361 22214 22450 22137 22326 22216 22221 22172 22389 22265 22201 21998 22343 22060 22208 22135 22365 21941 22261 21684 22121 21563 22084 21364 21977 21447 22004 21448 22160 21904 22341 21996 22344 22119 22454 22019 22551 21944 22471 21597 22320 21438 21972 21370 21868 21649 22204 21597 22545 21655 22767 21715 22709 21848 22183 21509 21911 21480 21811 21351 21866 21529 22315 21664 22517 21848 22062 21913 22183 22244 22252 22134 22341 22021 22295 21767 22228 21237 22086 21041 21750 21152 21648 21797 22061 21654 
21386 22387 21189 21884 22020 21624 21415 22384 21271 21799 22049 21720 21210 22432 21687 21785 21576 22149 21299 21821 21578 21974 21138 21900 21905 21783 21595 22281 21825 21712 21383 22128 21402 21666 21521 22236 21141 21829 21903 21863 21600 22297 21702 21595 21653 22112 21518 21600 21511 22289 21211 22359 21979 22003 21464 22230 21857 21600 21357 21961 21841 21593 21447 22322 21255 21462 22599 22061 20868 22352 22257 21376 21093 22263 22259 21945 21121 21671 21959 22327 21175 21772 22657 21509 20725 21388 22292 22201 21016 22071 22759 21900 20640 22712 21461 20983 21070 22473 21692 21107 21920 22978 21213 21408 22816 21447 20809 22822 21305 20825 21994 21756 21295 21632 21899 21488 21649 21904 21912 21474 21991 21848 21482 21897 22023 21556 21984 22137 21664 21809 22106 21556 22003 22089 21710 21488 22288 21432 21568 22032 21662 21409 22203 21474 21558 21964 21928 21241 22240 21400 21552 21821 21712 21297 22189 21409 21591 21820 21889 21157 22189 21509 21617 21733 21939 21254 22186 21488 21654 21837 21830 21284 22239 21515 21616 21743 21928 21209 22173 21463 21702 21832 21829 21299 15443 16708 18417 18910 19184 19357 19842 19181 20221 36232 26518 23939 23424 21961 22720 21931 21973 21933 22016 21290 22236 21379 21964 21541 21680 21482 21820 21111 22241 21415 21666 21905 21961 21690 22129 21368 22189 21811 21616 21731 21754 21676 21881 21177 22272 21397 21863 21997 21713 21770 22327 21157 22272 21879 21232 22200 21655 21352 22272 20698 22546 21167 21031 22848 21483 21995 22664 20984 22560 21104 21299 22088 21099 22277 21501 21113 23066 21196 22434 21802 21142 22233 21181 21643 21634 20669 22985 21032 21831 22292 21410 22025 21608 21874 21616 21571 22104 21853 21882 22151 21516 22010 21792 21606 21752 21396 22179 21880 21897 21999 21450 21889 21385 22248 21327 21900 22057 21700 21970 21827 21624 21812 21380 22307 21210 22007 21805 21584 21746 21639 21906 21763 21272 22349 21948 22004 21836 21668 21712 21689 21847 21763 21587 22320 21291 22228 21243 22199 21417 21680 21955 21870 21782 21991 21461 21956 21277 22406 21611 22197 21624 21949 21441 21702 21961 21847 21561 22274 21216 22327 21285 22124 21352 21876 21929 21654 21788 21565 21745 21874 21393 22319 21276 22314 21230 22170 21331 21912 21825 21735 21647 10677 18771 20347 20240 20827 20492 20791 20103 21240 20311 28049 23415 22753 22117 21877 22103 22420 21751 22144 21501 21933 21213 22360 21632 22176 21674 21673 21563 21622 22123 21753 21943 21568 21755 21776 21530 22773 20947 22545 20952 22454 21285 21680 22411 21325 22086 20883 22615 21414 22073 22311 21077 21918 20679 22694 21255 22011 22080 21272 21670 20984 22829 21294 22369 21293 22194 21468 20841 22944 20888 22577 21104 21975 21388 21208 22381 21445 22112 21511 21729 21603 21568 22006 21809 21958 21677 21830 21701 21557 22109 21572 21989 21613 21963 21513 21581 22116 21632 21852 21769 21629 21813 21429 22267 21555 22112 21476 22069 21718 21556 22027 21620 21845 21560 21969 21720 21808 21959 21441 21799 21248 22332 21414 22140 21698 21714 21546 21715 21916 21832 21864 21681 21869 21813 21620 22205 21366 22196 21253 22237 21829 22123 21657 21930 21410 21793 21904 21618 21682 21675 22003 21763 21748 21953 21439 21902 21447 22296 21184 22036 21249 22403 21280 22050 21250 22483 21200 22193 21536 22066 21322 22016 21841 21610 21650 21672 21937 21783 21738 21699 21985 21928 21778 22023 21589 22016 21410 22307 21289 22029 21298 22318 17268 20235 20141 21544 20528 21339 20725 21841 20693 30733 23842 23273 21850 22331 21324 22473 21449 22089 21296 22346 21440 22064 21260 22336 21532 22109 21299 22356 21394 22163 21232 22349 21484 22186 21184 22392 21559 22236 21368 22266 21562 22208 21472 22239 21076 22173 21325 22437 21464 22139 21790 21872 21364 21831 22095 21588 21399 21793 22192 21614 21296 21463 22615 21268 21335 21718 22001 21905 21335 22416 21262 22598 21150 22577 21314 22424 21372 22571 20637 23064 20977 21943 20968 22553 21269 21484 21324 22272 21803 21340 22323 20979 22875 21167 21865 21048 22290 21884 21213 22275 21207 22831 21173 22446 20777 22636 21604 21945 22458 21042 22301 21453 21819 21574 21984 21786 21699 21894 21494 22016 21586 21664 21988 21465 22195 21431 21793 21670 22088 21597 21721 21969 21529 22107 21457 21681 21843 21707 22094 21514 21898 21611 21816 22128 21680 21763 21632 21733 22146 21578 21913 21667 21719 22081 21632 21676 21936 21525 22307 21369 21829 21744 21681 21970 21774 21494 22192 21280 22173 21764 21783 21799 21672 21788 22281 21333 21867 21681 22057 21935 21769 21635 21839 21527 22297 21211 21858 21714 21588 21978 21753 16328 20736 20581 21751 21238 21449 21410 21570 21257 22135 23943 22760 21958 21903 22034 21761 21470 22132 21302 22335 21461 22412 21763 21746 21745 22136 21479 22063 21422 22007 21907 21677 21565 21943 21509 22412 21271 21926 21650 21735 21982 21768 21421 22246 21209 22451 21240 21895 21753 21721 21683 22242 21442 21921 21702 21750 21966 21689 21431 22129 21205 22432 21397 22304 21702 21841 21630 22372 21285 21975 21425 22042 21815 21737 21385 22301 21115 22322 21622 21941 21529 22035 21422 22402 21312 21216 21720 21691 21720 22071 21554 22040 21416 21785 22068 21729 21417 22251 21249 22328 21412 21719 21725 21922 21333 22359 21667 21856 21517 21981 21322 22355 21588 21843 21555 22014 21301 22376 21506 21892 21696 21900 21441 22417 21167 21491 21797 21767 21572 22597 21176 21904 21942 21216 22149 22465 20832 21677 22193 21095 22140 22656 20920 21559 22394 20788 21937 22797 20947 22083 21767 20973 22695 21841 21368 22343 21417 21208 22823 21825 21217 22381 20681 22115 22534 21201 21639 21922 20945 22980 21398 21415 22033 21613 22069 22598 21146 21764 21989 21000 22834 21707 21185 22241 21572 21045 22793 21079 21415 22375 21192 22277 20853 21260 21555 21796 21434 21927 21975 21436 21760 24632 22117 22335 21560 21559 22082 21440 21975 22039 21585 21693 21938 21335 22102 21978 21651 21720 21956 21361 22144 21841 21728 21792 21828 21470 22226 21515 21745 21899 21515 21968 22016 21469 21802 21785 21537 22080 21881 21496 21862 21831 21549 21999 21789 21512 22208 21296 22109 22000 21712 21591 22106 21471 22339 21441 21741 21924 21498 21815 22246 21303 21859 21805 21584 21822 21947 21403 22060 21389 22090 21876 21733 21420 22164 21181 22202 21749 21931 21497 22153 21208 22358 21352 21920 21593 22005 21286 22310 21622 21819 21657 21983 21277 22380 21614 21913 21543 21904 21703 22295 21289 21802 21770 21749 21543 22400 21234 21959 21687 21921 21517 22384 21360 22354 21760 21877 21442 22454 21369 21773 21783 21761 21612 22300 21381 21829 21719 21760 21479 22498 21368 21954 21687 21813 21350 22444 21577 21776 21455 22209 21204 22221 21888 21602 21488 22195 21223 22100 22008 21736 21311 22024 21703 21621 21688 22461 21424 21801 21469 22161 21346 22263 21894 21656 20840 22019 21657 21617 21807 22304 21383 21828 21568 22148 21293 21988 22001 21600 21454 22099 21646 21582 21883 22374 21075 21854 21963 21680 21149 22711 21680 21293 21522 22503 20797 21456 22784 21489 21369 22183 21937 20870 21672 23161 21504 21200 21312 22338 22242 21112 20642 22608 22964 21956 21168 21703 22412 22121 20604 21073 22361 23228 21648 20973 21147 21865 22474 21479 20432 21312 22750 22832 20917 21431 21449 22560 21269 20960 22000 22992 21970 21047 21394 22038 22336 20967 21000 21964 22389 21776 21485 21238 21863 21854 21738 21371 22176 22020 21632 21671 21708 21985 21888 21440 21874 22080 21959 21416 21689 21876 21865 21391 21720 22181 22004 21497 21687 21796 21952 21352 22031 22053 21688 21484 21908 21856 21873 21324 22131 22132 21689 21449 21650 21993 21639 21372 22145 22093 21968 21382 21769 21763 21937 21325 21872 22157 21593 21597 21863 21903 21540 21512 22404 21560 21785 21511 22148 21480 21867 22061 21786 21632 22016 21724 21637 21826 22347 21165 21868 21847 21628 21669 22359 21212 21920 21784 21638 21689 22390 21236 21884 21659 21638 22101 21915 21486 22162 21357 22048 21889 21792 21628 21744 21665 22372 21211 21920 21579 21841 21873 21781 21356 22123 21280 22389 21143 22055 21558 22101 21826 21740 21650 21712 21811 21958 21380 22293 21147 22445 21184 21953 21524 22145 21653 21578 21531 21974 21792 21909 21665 21708 21847 21865 21430 22007 21518 22384 21526 22227 21252 22472 16443 19151 18696 20042 19387 19932 19851 20199 19989 30343 24593 23141 22421 22258 21503 22432 21443 21975 21251 22351 21321 22153 21271 22389 21918 21957 10109 18459 19726 20239 20941 20911 20826 21243 20499 21155 26384 24217 22112 22468 22423 21658 22045 21632 21729 21706 20928 22817 21295 21619 22825 21290 22168 16248 19336 20673 19705 22439 20265 21963 21236 20841 21371 24843 22959 22257 20679 22873 21362 21531 22861 21233 22144 22183 20931 22517 21760 21256 22144 21104 18493 20515 20044 22638 21120 21231 22554 21220 20820 31558 22983 22553 22999 21048 22076 22976 20914 22336 22331 21304 22027 21669 21632 21858 21897 21281 22118 20317 21183 21664 21472 21488 21893 21430 21356 21793 24357 22141 22140 21779 21580 21790 21721 21492 21903 21420 21729 21773 21549 21611 21890 21343 21863 21719 21766 21344 22119 21360 21591 21891 21821 21248 22309 21611 21584 21920 22288 21587 21913 22007 21985 21403 22379 20864 21659 21953 21720 21374 22208 21507 21600 21708 22130 21328 21692 21803 22051 21228 22153 21725 21789 21526 22343 21302 22023 21866 21833 21261 22149 21626 21685 21344 22157 21785 21656 21693 22350 21312 21711 21853 21947 21165 21728 21777 22272 21275 22096 21999 21756 21454 22360 21451 21677 21600 22280 21678 21856 21445 22439 21416 21632 21829 21914 21340 21604 21788 22176 21385 22068 21900 22012 21160 22140 21559 21895 21144 22224 21767 21881 21508 22400 20881 21696 21925 21929 21196 21979 21608 22066 21261 22123 21962 21832 21283 22300 21536 21696 21412 22170 21824 21815 21381 22483 21541 21539 21414 22183 21586 21608 21627 22422 21344 21642 21980 21915 21186 21379 21885 22360 20764 22016 22877 21628 20771 22845 22168 21698 20598 22632 22740 21570 20727 23015 21544 20987 20915 22768 23212 21543 20251 22747 22048 21677 20631 22375 22787 21661 20781 22907 21946 21888 20833 21763 23095 21529 20370 21830 22292 21969 20932 21704 22368 21550 21469 21576 21998 21904 21592 21373 22157 21690 21721 21366 21880 22055 21609 21404 21632 21988 22264 21632 21512 21434 22008 22006 21782 21277 21666 21835 22316 21509 21660 21302 21825 21989 21911 21519 21725 21561 22409 21480 21697 21216 22140 21952 21798 21321 21528 21867 22400 21427 21622 21341 21911 21928 21865 21459 21559 21624 22339 21455 21964 21377 21783 21659 22226 22032 21842 21294 21603 21730 22342 21524 21866 21328 21725 21852 22115 21842 21280 21207 21709 21488 22274 21559 22247 21563 21688 21356 22179 21948 22029 21460 21938 21232 21622 21618 22392 21600 22209 21600 21671 21346 22144 21912 21967 21485 21888 21231 21952 21718 22372 21617 22119 21680 21628 21332 22108 21908 21924 21496 21725 21283 21880 21792 22316 21504 22222 21724 21649 21285 21969 21896 22058 21915 21865 21287 21448 21420 22017 21987 22869 21452 21710 21228 20923 21093 22179 22621 22422 22464 21497 20891 21208 20754 21681 21562 22682 22151 22688 21208 21106 20946 21103 21432 22391 22816 22311 22747 21740 21882 21608 20600 20977 20693 21344 21839 22151 22017 22117 21807 22091 21799 21863 21786 22018 21734 21818 21697 21671 21867 21474 21698 21369 21462 13723 18137 19079 19730 19939 20517 20198 20677 20146 20672 26094 23938 23237 22182 21797 9065 17751 19790 20084 20705 20500 20949 20790 21255 20960 27872 24070 23113 22491 22426 22051 18696 20445 21212 21227 21455 21259 21415 21224 21463 28427 23799 22361 22105 21793 21944 18014 20667 20653 21441 20825 21496 20975 21468 20965 21526 22984 22244 21527 21800 21331 18901 20562 21338 21069 21514 21440 21862 21476 21547 21212 22964 21610 21876 21368 21864 21485 22019 21641 22148 21644 22115 21710 22179 21785 22341 21674 22029 21707 22164 21783 22231 21859 22311 21781 22299 21766 22384 21800 22314 21735 22342 21785 22306 21783 22522 21933 22640 22125 22929 22101 22963 22113 23078 22293 22985 21957 22928 21456 22496 21190 21929 20629 21703 21305 21920 21201 22788 22049 23034 22247 22957 22283 22506 22158 22122 21616 21368 20970 20984 21297 21552 21453 21743 21762 21511 22107 21782 22123 21879 22049 21943 21552 21560 21531 21263 21571 21536 21739 21567 21734 21787 21688 21865 21852 21974 21936 22019 22069 21895 22123 21691 21984 21478 21733 21193 21586 21288 21579 21517 21728 21459 21987 21401 22108 
41885 42816 40067 37481 38496 34370 42029 42584 40898 36520 38833 35446 40039 42920 35384 36004 33584 39860 40984 36819 33754 38048 39155 37464 37349 36121 34055 41196 36628 35115 41681 39925 42040 34904 32843 40841 39408 36702 37548 37140 33863 41377 35386 34022 34486 39384 33177 33682 32832 41112 40333 42422 38647 38674 42628 41249 37032 33864 41508 38293 36692 33948 42349 41965 40661 42840 34735 39050 36255 41959 41457 41600 39049 41620 41536 36616 42795 39191 34898 38442 41017 35184 39439 38557 33817 37776 35936 33101 35200 42260 37829 41316 35998 41522 34985 32935 40051 43259 35768 39050 37543 43200 37286 36873 42496 33261 34652 38204 34626 34400 40512 38673 40966 34304 37305 42720 34705 37104 37423 42627 38766 36829 42828 37552 38736 33495 38008 40071 34695 36155 39585 33526 38436 39480 35523 42615 41484 42421 33684 38381 34880 41784 40999 42840 33800 37952 37650 40468 41064 42009 33495 36461 35143 40644 40776 42116 34272 36386 37095 39432 40728 33060 33993 35466 37788 40322 40600 42925 34856 36690 36592 40556 41448 33264 33876 35779 37573 40070 40552 42915 35456 36456 36571 40815 30673 32228 40560 36315 38802 40844 35973 39065 40354 37649 45465 39192 43121 38359 35636 37765 38248 37920 38374 40808 41254 41840 38320 33381 34594 42677 36772 39102 41109 42387 34888 37232 38080 35121 39736 41719 40827 36554 34065 35458 35814 34840 37174 39697 41126 42075 37313 38660 35336 35755 41922 39659 41132 37517 40153 40711 34913 41272 41224 34696 33408 39600 38216 37014 42951 38830 35072 37510 33686 38610 40913 39498 39090 41354 43422 39312 39607 40025 43013 36548 39211 41154 40071 34672 34139 34112 38556 38096 36713 41363 42125 38880 34167 36914 34072 33496 39336 37070 37248 40147 33104 38517 36020 34081 35658 41664 40581 37276 37312 38772 42523 37365 41716 41320 41632 37529 39082 35177 37992 36585 34264 36199 41479 41851 40320 38889 36515 33633 35531 34404 37175 35768 40364 42400 38113 38548 36758 34677 35072 34986 36823 35759 33785 41473 41058 41072 40718 40904 42322 34992 37914 37240 36004 38501 42649 38195 40746 42824 34561 40496 34470 37941 42315 35414 38026 36971 33559 40965 40100 42177 40944 40020 41563 37256 37750 34626 36012 33672 35528 36982 41688 42218 40842 41920 40629 40426 41393 37578 36484 35717 34657 30375 34164 41250 40097 36118 31906 35305 38726 40416 41210 41801 43604 36396 39760 37312 39697 42741 36200 39728 43313 38150 40261 42329 34354 40028 35008 34762 33603 34155 39799 36013 37934 33482 35824 35688 33045 36293 37178 33568 37008 43214 41007 34918 42715 41524 39594 36536 34630 41936 39453 41931 38801 37769 34373 35284 40331 38916 39220 40528 35014 37481 37059 40908 42475 41188 40632 42886 36304 37995 36464 33969 38613 38384 41836 40136 42800 42690 39773 33121 35281 34011 33265 38472 36322 37996 35079 36481 35193 33414 39617 33697 38284 34403 38068 32960 33691 39495 34248 36768 35840 34489 36315 42188 41792 33709 39363 42776 39457 35539 33321 38592 34296 36681 33460 37923 35417 36080 38104 42279 36565 40010 42112 42320 40306 35213 35168 33265 35184 37475 36537 36932 34872 37096 36432 34176 40711 41794 40749 40501 41337 36700 39905 34816 37591 41949 36247 37188 34186 34775 34853 38506 35818 35673 37829 42587 37728 42513 41698 39749 38842 40214 42780 40687 39040 40224 43703 40096 40601 33219 38856 41216 38477 36736 34154 34343 34608 37623 36134 35648 35097 38193 37643 35892 38656 33988 38190 41944 41876 40975 38985 40824 42072 38828 40244 39449 33371 32083 41176 35026 36564 34424 39090 37723 41904 37050 42053 41389 43656 42800 39687 40768 42267 42392 39185 40500 41923 33425 39617 40976 42312 41984 40416 40296 42400 43144 40753 39720 42695 33927 40919 41792 41633 33794 40353 42692 41544 38764 40500 41413 43255 42864 40385 36381 36896 41527 36864 39705 33901 41830 36232 40349 34468 40532 42848 34977 40272 41560 35586 38461 37344 41392 42756 40823 34480 39348 34103 40787 42932 42024 34360 33718 39223 37584 38025 37400 33800 40337 43040 41408 41252 36536 41361 42040 37842 37635 39783 37204 38144 41401 37467 40242 41360 40352 37282 39671 43380 35539 34816 33879 37665 43300 38343 41760 42840 36864 33670 38036 36091 35137 37168 42968 38592 33834 34391 38200 42693 40848 42554 36326 34752 39207 34221 35357 38001 33195 39555 42574 35156 36660 35367 39475 33033 37141 34283 36248 39666 34885 35674 34036 35488 39766 33873 37389 34761 35439 39136 34229 34785 37482 33124 41445 41905 36813 35559 34816 37989 36032 42912 40624 40596 40599 35829 36068 36291 34704 36001 41280 41456 37376 34888 38961 38052 35898 34308 36756 33189 41353 40352 37013 35250 33706 38146 35925 39805 34679 33008 35778 40316 42628 42209 33762 40215 40226 39112 36322 37970 37640 38665 35712 42744 40096 41048 42400 42864 42945 36037 35616 35638 39832 43016 39611 42358 38997 37521 35041 33664 37793 32893 42509 40852 37857 34461 35608 38390 35776 42200 41408 40239 43372 40618 37536 35938 35400 34927 40906 42425 37781 35219 35751 38180 35128 42276 40039 40152 42920 42146 41585 35425 36560 34551 42178 40943 38523 42160 39078 36629 35658 41644 41897 39382 41848 34579 37765 33188 38555 42333 42740 41070 40250 35531 35116 35290 39216 33450 38585 42048 36292 39064 35554 42039 41560 40356 41984 42177 35785 35591 37414 41253 42566 35029 36659 33059 38241 41164 42402 34061 36624 33472 38656 40992 42562 32967 36962 34958 37225 42259 42944 40022 43160 36498 35863 33540 34137 39444 37248 37876 39963 40168 43361 36045 34995 40369 39032 40182 34880 36720 33632 42501 35532 37687 36628 37181 39356 35987 37610 35600 36554 41548 42385 42354 40220 37104 36421 40027 42801 34531 39636 33600 39691 34652 37367 37129 38553 41905 42425 38922 34390 39098 34395 39176 35800 38353 37628 36924 35340 39596 41158 33760 38095 36507 38689 42274 42774 40017 41427 36407 40353 33658 35936 42241 37995 38389 42396 35792 35052 39634 42317 33720 33472 39050 42208 38585 38969 33864 35105 37619 41394 39770 38403 34645 35264 37828 41536 39962 36771 35360 35891 36408 42735 41090 33216 35528 37341 33029 37806 38344 42865 36535 36037 33090 38920 37333 42929 37270 36704 33503 38596 36274 32756 40311 40777 39958 38502 35227 33952 39465 43029 42304 42505 36124 37511 43030 36808 41155 41221 37172 36411 33621 36484 37984 42064 39337 41955 39648 37217 35625 42096 40328 39993 40822 36017 37761 43093 40327 40097 42405 41636 37617 34036 38475 40774 41856 34566 36492 34665 38414 40784 42715 34595 37394 33456 37024 35328 41512 40938 36448 35840 35755 33350 42177 40456 38304 35232 37401 33094 42166 41616 42232 35797 37120 42246 43497 42021 36227 36097 35584 34173 41421 41872 36804 35541 35446 42809 43904 41919 38092 35209 36316 41418 43344 34055 35619 42645 40874 40064 41127 37181 33984 42550 40819 40484 39633 38704 35628 41184 38727 35389 34265 34850 43313 42296 36512 42784 40414 41472 41690 37456 34570 35991 38504 34720 34081 36406 41372 41984 36705 33435 39728 41031 38503 38583 33943 42432 39766 34724 33792 37237 42421 38784 37082 38208 34792 39360 35893 34705 40789 33131 43637 35913 42298 36391 42762 41952 40777 37860 36274 34755 40552 32737 39536 40934 42084 41233 39095 33796 34144 38230 37937 39440 35448 42656 40036 33600 38311 42375 41592 34535 37528 39442 37177 43424 43200 42321 41088 36474 36741 36848 42358 42754 33947 40330 37331 38416 38656 38136 38379 41753 39024 41849 37735 37613 38167 42672 35981 42924 40755 37296 37012 35664 41754 40376 38614 34200 34791 35201 38208 37033 42112 37288 39115 38229 42048 35332 37031 37045 41960 35600 40357 38656 43105 35433 36034 37715 41415 39130 39088 35072 42764 37616 36772 37032 41147 40128 40000 35221 42359 34697 38395 34552 41605 40081 39712 38082 41704 36067 35722 37655 41289 37143 40235 34128 34004 36987 37560 33192 32597 42285 33706 35926 32911 39702 42832 37430 39232 36144 34071 38211 35548 34311 36330 42158 39856 37242 36928 34418 34688 42229 40320 37576 35979 34313 34977 42519 40533 37494 34777 34263 39453 37715 43025 40357 41792 38948 37196 35949 34425 35423 34600 42192 40388 37576 33880 36519 37045 35996 41523 40104 40597 42810 39601 39253 33613 39414 36537 35688 34416 34998 36309 37968 41569 41685 39634 43366 39831 38022 33003 39669 34720 33741 33066 38055 35999 37401 34697 35175 36835 37028 42251 38957 33177 42158 33292 40741 40341 43432 30134 38504 33493 37959 41152 37209 36108 39936 37608 45613 35020 40320 43008 41509 43520 43101 42673 38609 40332 42516 41370 40279 40792 42793 37840 38051 34800 30851 34433 40152 37370 36960 35855 40504 32215 39190 43978 42197 39800 43383 43284 34951 38926 34188 35332 35174 36679 36649 41004 34464 36789 40729 40339 39280 40394 34246 34448 42993 40723 38340 40380 36188 41817 37851 38624 41316 34516 37355 41488 33441 37280 40256 39884 40681 37152 43952 35873 40167 39925 38892 31501 32000 37895 35000 38656 40541 33969 39941 35790 48164 39235 33852 38848 38263 39328 38519 36796 41736 42287 41079 38945 34917 34020 36712 37299 40555 39936 41275 40151 34712 42384 42969 37534 42272 41793 36288 43268 40448 40235 36120 33745 36071 35433 42743 37826 42192 35697 35962 33475 34105 36980 41539 37301 35562 35725 41104 40085 41536 34245 37104 36641 40006 41824 34541 33529 37243 41230 34064 37367 38768 38351 42077 42836 36387 34741 37780 35401 41744 40713 33015 33664 35122 39735 41128 35309 36311 38935 40373 40213 35795 36160 33009 41960 41136 38855 37132 36674 40473 40157 34588 34913 41059 40416 36234 34510 35109 42151 41058 35683 36944 38054 39683 35460 35808 40960 40844 39462 38875 36033 42512 42448 42858 35280 33776 41063 35224 36662 42344 43426 42327 34368 36465 37489 41384 34210 35987 40100 41868 39287 37457 38764 39464 40152 33813 37230 39193 40816 36088 37220 32727 42146 36676 34918 37559 37745 39916 38512 34169 38913 40598 40084 38228 36598 40641 41728 33283 34771 41797 40495 36498 36515 41618 43773 33632 33107 41813 40750 33961 33936 34360 42688 41494 34629 38216 37687 39719 41728 37632 42228 35357 38219 37692 34457 35036 37140 40193 35216 33287 34517 35840 33476 34778 39037 33370 37672 36844 36192 41121 33597 40153 36323 38727 35136 33643 42336 36631 34785 35300 37888 38004 37061 35891 35665 39899 33291 41190 36729 41383 38304 36980 35117 42059 33763 42624 33889 38523 37265 33911 41672 40428 35255 35408 41569 37345 39116 34304 41811 34333 38216 41368 34336 32660 42061 38794 38720 36085 40671 34816 36649 41752 33095 34520 40769 36591 38412 37641 33217 35456 33479 42506 43013 35334 39856 40183 37919 36256 41079 33229 36979 42361 42489 34624 41336 37738 37639 37104 42547 33904 34128 41849 42985 38379 41578 36295 34727 40704 38710 36736 40882 34258 35332 41952 33256 36876 40988 35784 36828 39733 36777 40531 40260 35557 42612 41376 33886 41129 33876 34816 41408 40569 38128 38868 42580 37938 40183 34488 34065 42392 34135 40487 34007 34779 41171 39929 37541 38380 43067 37269 40520 37909 35451 42231 34464 39764 34864 34345 40995 39829 37477 37576 42944 35904 40593 37284 35968 41712 32827 40777 35657 34364 40561 38227 37253 39064 37731 37092 40826 42539 42415 38662 38472 37488 42522 35680 40248 37166 38784 40421 34914 42739 43416 43378 36940 39954 34976 34748 33432 35090 40052 35336 39879 38984 37184 39089 42271 42971 36828 41797 36450 35717 37233 34062 33152 37340 34425 41032 37056 40107 38581 39841 36672 39516 36448 37091 36074 38400 35698 36423 35037 34829 37036 42619 35314 41620 42838 32773 37907 37873 34573 36968 32288 39636 34341 39040 34151 41072 38888 41404 40617 36366 33303 33840 35337 38450 34544 31832 36992 35409 40322 37312 39648 40298 40212 43896 43240 39129 33680 42292 40345 40528 42929 40758 42381 40394 42899 46022 37987 42348 39881 36208 37792 36872 34209 33906 42073 36074 42849 37995 42721 37681 33127 38385 41115 33389 35980 41160 36123 32720 41079 38759 32983 41896 37187 42668 33738 39939 38499 34249 36962 41575 37127 42983 38798 34528 39769 34600 39601 35521 40295 36213 42001 35088 38696 35436 40023 36249 41037 37137 41787 36224 41614 36005 42304 36384 41687 35955 41984 36280 41479 36321 43947 38170 34768 39872 38041 39650 38549 39706 39744 41650 38912 38144 37878 42391 43784 40128 37877 33814 35190 40872 37587 39896 36442 38845 39387 41408 38664 41521 44010 40515 39944 34200 41420 37657 37625 40784 33435 42407 36144 35622 32896 39552 36117 39885 37440 38857 38044 33300 33267 33048 40417 33831 32866 35587 33777 35472 36112 34944 36974 36897 38232 37670 38576 39266 37454 39943 35328 38087 42813 35876 39802 33894 40500 34031 32908 35174 42453 38640 42008 39895 
23799 22792 23844 23383 23364 23296 23744 22816 23752 23398 23128 23222 23681 22949 23318 22974 23909 22749 23478 23412 23332 23079 23812 23240 23259 22962 23591 23171 23125 22924 23927 22768 23521 23427 23465 22853 23840 23210 23207 23144 23654 22992 23107 22957 23823 22934 23737 23433 23555 22845 23571 23232 23225 22901 23490 23301 23111 23001 23919 23173 23249 23564 23660 22608 23614 23552 22864 22507 23564 23760 22369 23240 24496 23073 22842 23807 23951 22614 22679 23304 23904 22268 23479 24224 23719 22487 23383 23681 23304 22223 22967 24262 23291 22668 24365 23467 22791 23520 23443 23250 22950 23325 23552 23009 23144 23790 23248 23045 23086 23395 23089 22919 22956 23724 22949 23281 23089 23477 23278 23121 22971 23788 23095 23069 23069 23544 23269 23233 23153 23700 23368 23248 22704 23300 23384 23589 22647 23207 22833 23981 23049 23149 22820 23424 23362 23625 22679 23136 22885 24146 23531 23788 23684 23808 23473 24235 23525 23895 23783 23905 23404 24195 23554 23858 23727 24105 23341 24234 23538 23877 23747 23939 23379 24151 23506 23794 23737 24014 23311 24199 23452 24017 23447 2249 14416 15071 15048 16753 15976 16771 16813 17495 16719 32484 27624 26473 25771 25958 24792 25417 24457 24935 24474 24541 24235 24679 23666 24720 24128 24019 24064 24114 23680 24215 23505 24408 23636 23860 24081 23843 23639 24396 23591 24117 23736 23581 23761 23853 23490 23904 23271 24295 23527 23723 24128 23811 23693 24821 23381 24016 24291 23210 24206 23840 23364 23991 22625 24592 23325 23046 24679 23490 23883 24381 23193 24398 23685 23376 23818 22770 24449 23819 23298 24800 23185 24381 24098 23148 24185 22933 23905 23409 23237 24000 23703 23712 23968 23203 23949 23344 23941 23441 23509 23927 23351 23623 23948 23275 23905 23385 23863 23389 23623 23808 23521 23683 23695 23608 23656 23182 24021 23638 23763 23659 23483 23501 23475 23693 23637 23157 24193 23262 24000 23309 23567 23345 23541 23476 23624 23109 24177 23128 23939 23249 23703 23237 23453 23715 23734 23467 23873 23076 23809 23016 24007 23096 23789 23600 23409 23456 23434 23515 23606 23232 24087 22860 23911 22893 24019 23011 23538 23536 23639 23449 23815 23056 23673 22944 24058 23065 23890 23168 23451 23308 23414 23492 23709 23311 23904 22960 23776 22823 24114 22996 23814 14208 17685 17698 18432 18760 18657 18260 18448 18908 18913 27399 25772 24516 25015 24074 24458 23841 24040 24064 23759 23896 23776 23780 23799 23387 24237 23197 23988 23149 24028 23282 23865 23690 23185 23520 23015 24545 23252 23845 23712 23196 23588 22391 24689 22844 24312 22895 23580 22904 23100 24496 22855 23829 22966 23174 23234 22663 24529 22688 24060 22530 24232 22724 23808 23639 23205 23669 22483 24357 22959 23610 23788 22635 23542 22789 23726 23473 23408 23668 22980 23605 22869 23727 23349 23543 23479 23160 23357 23147 23559 23461 23275 23626 22992 23457 22840 23752 23116 23507 23437 23155 23214 23150 23457 23453 23278 23575 22839 23557 22908 23888 23011 23686 23113 23528 22963 23490 23415 23121 23229 23232 23258 23331 23094 23815 22785 23568 22739 23799 23176 23664 23120 23380 23010 23248 23417 23207 23235 23488 23008 23448 22861 23825 22693 23719 22724 23863 22923 23682 22810 23543 22921 23555 23274 23192 23093 23144 23397 23347 23190 23208 23308 23441 23197 23338 23232 23444 22865 23744 22807 23504 22742 23816 22805 23735 22750 23829 22944 23672 23016 23623 22933 23424 23395 23399 22951 23256 23468 23344 23130 23189 11340 18137 18706 19333 19620 19828 19675 19865 20135 20119 27621 25165 24758 24261 24108 23876 23900 23619 23693 23554 23707 23573 23591 23421 23568 23548 23449 23461 23510 23513 23463 23517 23509 23527 23453 23296 23512 23394 23319 23557 23199 23323 23232 23715 22919 23418 23255 23547 23171 23287 22936 24098 22518 23479 22603 24485 22374 23600 22550 24325 22536 23415 22203 24525 22537 23500 22464 24356 22746 23041 23133 23721 23129 22913 23329 23708 23136 22933 23773 22816 24065 22784 23669 22391 24224 22601 23051 22400 24064 22986 22760 23594 22919 24144 22775 23820 22150 24241 22566 23127 22942 23333 23689 22845 23840 22278 24211 22848 22887 23634 22945 23559 23123 23216 23008 23317 23297 22912 23529 22705 23752 22703 23245 23181 23219 23481 23111 23296 22972 23622 22984 23146 23384 23079 23649 22967 23473 22941 23515 23242 23131 23327 23029 23348 23480 22821 23482 22788 23600 23121 23201 23148 23200 23066 23628 22921 23409 22971 23400 23415 23163 22938 23311 22970 23694 22784 23236 23240 23114 23367 23314 23426 23592 22760 23633 23172 23382 23069 23067 23216 23576 22755 23557 22811 23348 23342 23098 22899 23479 22794 23808 22666 19101 20227 20544 20935 20997 20451 21504 20544 21547 30105 24864 23905 23952 23301 24166 22904 23561 23229 23261 23420 23297 22961 23646 22753 23748 22980 23395 23217 23107 23168 23631 22875 23575 22732 23561 23169 23309 22877 23424 22780 23831 22510 23277 23136 23238 23255 23080 22722 23664 22585 23655 22996 23147 22960 23279 22883 23671 22741 23259 22977 23195 23361 23060 22789 23613 22661 23558 23127 23275 23040 23152 23040 23673 22612 23415 23023 23101 23142 23362 22852 23555 22694 23473 23296 23091 22860 23584 22631 23628 22832 22637 23176 23032 23035 23673 22673 23223 23154 23111 23325 22981 22192 23518 22784 23272 23258 23212 22853 23406 22935 23053 23306 23277 22951 23400 22840 23129 23298 23244 22663 23480 22722 23220 23478 23040 22833 23522 22613 23415 23453 22728 22822 23580 22398 24000 23183 22736 22905 23651 22151 23976 23465 22735 22858 23768 22027 23923 23594 22641 23417 22938 22416 24356 22510 22695 23709 22627 22712 24335 22581 22947 23702 22192 23632 23636 22614 23503 22617 22801 24133 22521 23045 23799 22165 23957 23260 22807 23163 23056 22454 24333 22593 22880 23657 22755 22756 23786 22576 23209 23328 22453 19980 21466 21989 21900 22229 21701 22592 22008 22145 22156 24483 23351 23849 22889 23224 23347 22887 23360 23367 23044 23215 23189 22939 23396 23092 23093 23294 23115 22965 23433 23162 23061 23399 22896 23228 23335 22906 22901 23477 22661 23616 23008 23015 23054 23232 22849 23680 22853 23320 23055 23289 22704 23655 22709 23105 23221 22948 23230 23451 22747 23329 22993 23223 23265 23013 22906 23485 22637 23552 23013 23100 22927 23335 22688 23591 22720 23577 23008 23048 23057 23552 22628 23353 22942 23028 23159 23383 22819 23446 22862 23232 23197 23110 22823 23573 22760 23205 23289 23221 23237 23431 22894 23205 23309 23089 22708 23533 22528 23526 23099 23034 22663 23621 22503 23456 23255 23061 22693 23498 22678 23427 23324 22991 22765 23548 22618 23447 23225 23107 22752 23524 22570 23488 23173 23040 22725 23552 22613 23333 23179 23084 22671 23664 22592 23373 23283 23240 22749 23306 23013 23023 23136 23651 22762 23247 23096 22988 23023 23671 22706 23698 22985 23393 22597 23370 23257 23074 22710 23224 23091 23132 23274 23438 22589 23140 23049 23244 22550 23477 23264 22973 22923 23225 23143 22919 23031 23572 22740 23127 23105 23287 22615 23552 23232 22696 22839 23651 22618 22805 23808 23179 22560 23086 23452 22402 23051 24388 22223 22593 23490 23278 21902 23516 24192 22825 22389 22816 23463 23784 22215 22282 23761 24358 22851 22917 22863 23899 23125 22210 22360 23872 24173 23139 22197 23261 23076 23789 22753 22101 22652 24202 23665 22374 22675 23069 23729 22558 22129 23717 24220 23300 22204 22936 23399 23685 22226 22247 23469 23360 23186 22710 22951 22930 23439 22832 22962 23357 23493 22695 23109 22864 23392 23008 22797 23097 23578 23045 22856 22754 23392 23075 22833 23001 23593 22989 22947 22820 23383 22954 22903 23226 23488 22663 23209 22961 23413 22785 22907 23264 23623 22754 23013 22831 23539 22711 22981 23065 23660 22895 23041 22808 23401 22967 22880 22987 23716 22538 23587 22887 23440 22520 23374 23293 22996 22951 23330 23090 22923 23017 23763 22561 23063 22946 23289 22604 23564 23180 23063 22755 23434 22512 23626 23035 23063 22696 23487 22528 23677 22904 23062 22873 23320 22733 23692 22565 23229 23048 22940 23163 23479 22724 23404 22521 23513 23153 23032 22799 23288 22827 23666 22481 23297 22784 23359 23156 23136 22866 23209 23123 23512 22890 23623 22417 23733 22464 23252 22984 23188 23324 23061 22987 23100 23070 23289 22784 23244 22935 23446 22928 23560 22592 23762 22474 23368 22700 23581 22987 23269 22848 23377 10104 14288 14884 15378 15983 15998 16060 16384 16460 16560 28635 26820 25584 24832 24725 24247 24468 24036 24037 23853 24214 23890 23884 24064 23533 23991 23313 15475 16529 17936 17700 18578 18139 18469 18886 18513 18679 26932 25359 25031 24130 25078 23865 24412 24120 23652 23968 23404 23536 23705 22677 24752 23297 23780 18473 18453 19884 18911 20517 19499 19499 20952 19169 32188 26398 24584 25108 23864 24167 23904 22836 24997 23570 23554 24743 23069 23520 24726 22749 24325 23800 19081 20909 20067 21118 20967 19942 22272 20974 20181 27804 24572 23135 25477 23431 22935 25040 23177 23187 24237 23450 23497 24023 23102 23765 23695 23428 19591 22120 21575 22353 22391 21918 22343 22632 21896 22589 24666 23732 23753 23863 23241 23664 23640 23256 23559 23668 23046 23667 23323 23187 23400 23752 22652 23826 23360 23208 23495 23833 22896 23753 23370 23558 23241 23860 23119 23313 23589 23371 22880 23771 23046 23200 23264 23483 22716 23575 23033 23223 23013 23680 22937 23244 23147 23723 23011 23461 23533 23626 22853 24005 22899 23240 23398 23447 22644 23480 23140 23381 22812 23760 23236 23341 23106 23991 23340 23380 23319 23507 22584 23438 23181 23814 22771 23639 23344 24071 22647 23943 22869 23218 23037 23620 22969 23242 22981 23825 23011 23094 23232 23462 22923 23098 23273 23713 22688 23543 23303 23520 22724 23919 22994 23415 22600 23845 23213 23512 22957 23821 22800 23249 23217 23492 22738 23334 23224 23408 22748 23630 23346 23581 22876 23747 23060 23056 22764 23688 23209 23322 23079 23808 22976 23012 23060 23544 23171 22983 23217 23872 22977 23029 23385 23441 22608 23223 23360 23697 22592 23383 24236 23597 22359 24128 22980 22411 22112 23827 24237 22940 22623 24592 22903 22151 22739 24088 23828 22612 22803 24264 23232 22301 22232 23961 24257 22823 22293 24412 22990 22178 22447 23863 24455 23433 21960 23398 23671 23180 22198 23740 24405 23097 22667 23374 23399 23015 23047 23194 23814 22945 23125 22849 23540 23366 23760 22951 23353 23264 23364 22882 22972 23251 23527 23267 23175 22949 23569 23099 23372 22913 23123 23243 23504 23333 23624 22698 23194 23268 23687 22890 23010 23086 23562 23283 23247 22730 23602 23136 23586 22753 23125 23113 23553 23232 23336 22612 23345 23301 23788 23161 23182 22862 23653 23277 23289 22576 23206 22757 23654 23141 23573 23029 23165 23047 23601 23335 23325 22690 23075 23033 23774 22935 23393 22256 23149 22641 23573 23397 23370 22903 23233 22695 23389 23215 23808 22956 23600 22813 23173 22704 23720 23256 23511 22903 23415 22726 23464 23162 23863 22823 23304 22673 23140 22812 23573 23319 23360 23018 23255 22711 23419 23197 23783 22987 23277 22842 23290 23177 23594 23428 23431 23089 23324 22603 23104 23063 23829 23107 23645 23342 22902 22474 23132 23071 23829 24034 23184 22884 22920 22046 22729 23285 24264 23528 24155 22745 22577 22412 22279 22513 23623 24155 23647 23866 22902 22420 22881 22177 22838 23369 23459 23771 24410 23123 23963 22803 22791 22706 22068 22645 22978 23335 23206 23514 23281 23668 23351 23647 23242 23639 23097 23603 23031 23535 23004 23399 22997 12595 14130 14921 15121 15599 15776 16369 16303 16823 33465 27719 26819 26040 25409 25015 14031 16749 16882 17773 17389 18066 17740 18291 17905 18310 27356 26210 25171 25130 24513 14594 18402 19606 19495 20166 19863 20634 20089 20773 20141 27984 25656 25639 24672 25081 24121 20672 20577 21573 20963 21633 20897 21561 20974 21474 26517 25243 24115 24491 23636 24304 21257 22290 22210 22321 22136 22256 22023 22469 21785 22557 23448 24027 23627 23811 23510 23599 23143 23531 23215 23424 23065 23445 23089 23442 23047 23435 23040 23409 23024 23321 23036 23442 23012 23512 23054 23462 23236 23381 22896 23352 22851 23408 22752 23405 22729 23252 22656 23269 23030 23244 22788 23392 23139 23642 23388 23851 23936 24142 24297 24132 24503 24027 24436 23936 24461 24117 23689 23656 22967 22946 22772 22683 22533 22476 22644 22530 23010 23040 23133 23341 23240 23545 23525 23609 23779 23427 23506 23047 23129 22988 23059 23366 23312 23131 23560 23200 23699 23275 23776 23334 23799 23366 23768 23424 23613 23372 23456 23074 23186 22848 23344 22873 23314 22904 23574 23021 23411 23287 23509 23494 23668 23448 23776 23476 
21920 21821 23313 21345 22512 22676 21765 22019 23118 21440 21983 22714 22309 20737 22071 23746 21794 21668 23907 21899 21547 23271 23249 21244 21872 22432 23040 22118 22023 23064 22117 22273 22632 22824 21943 22741 22501 22155 21929 22340 22497 21909 22038 22944 22061 22428 22471 22770 21649 22592 22372 22681 21562 22466 22577 22295 21804 23048 22224 22284 22117 22923 21670 22591 22102 22699 21593 22512 22508 22511 21799 23118 22147 22235 21821 22691 22221 22228 21953 23032 21799 22404 22213 22972 21527 22443 21881 23303 21612 23106 22343 22890 21585 22576 22225 22169 21872 22748 21845 22391 21715 23272 21837 22620 22412 22981 21515 22443 21864 22731 21583 22199 22449 22611 21536 22605 22072 22740 21680 22384 22610 22776 21512 22318 21993 22890 21771 22338 22432 22896 21594 21616 22032 23863 22489 21374 20972 22025 23591 22800 20872 21548 21968 23779 22160 21438 20885 21947 23478 23125 21553 20946 21663 22811 22416 23367 21156 21319 22024 22567 23233 22028 21923 21831 22253 22547 22733 22371 22272 21818 22128 22029 22868 22354 22220 21728 22374 22295 22569 22500 22459 21493 22132 22047 23080 22261 402 1348 1951 1073 2653 3037 3130 27334 26756 25096 25263 24128 23492 23504 23069 22469 22601 21944 22272 21832 21429 21915 21687 20996 22065 21079 21248 21581 21319 21024 21636 20423 21261 20658 20784 20758 20789 20727 21026 20237 21495 20352 20847 21026 20807 20703 21242 20084 21447 20356 20999 20624 20995 20346 21024 19929 21455 20215 20864 20783 21046 20534 21494 20039 21420 20254 21145 20425 20812 20692 21090 20281 21773 20294 21678 20689 21111 20701 21132 20940 21257 20144 21784 20626 21392 20963 20965 20909 21111 20659 21351 20277 21735 20841 21629 20843 20900 20886 21452 20481 21462 20249 21864 20403 21468 20936 20882 20904 20864 21016 21336 20817 21645 20450 21525 20684 21040 20771 20937 21214 21208 20812 21751 20389 21569 20424 21432 20616 20941 21497 20820 20538 22186 20079 21621 20377 21472 20447 20228 22165 20279 21584 20837 20577 20882 19761 22621 20450 21132 21510 20419 21372 19949 22235 20982 20761 22281 19973 21551 19685 22567 20684 21463 22295 20271 21765 20701 20700 21045 19659 22724 20288 21591 20962 21368 21145 20570 21859 20717 21567 20953 21241 21076 21006 21597 21047 21248 21124 21303 3827 6567 8391 8465 10083 9610 10807 9991 11279 28842 29234 26838 25623 25152 24320 23798 24219 22615 23481 22061 23331 21880 22759 22177 22154 22092 21905 22277 22099 21945 22325 21526 22016 21205 22560 21052 22313 21166 22196 21216 21895 21747 21681 21495 21639 21692 21896 21348 22185 20881 22005 20841 22371 21097 21692 21608 21495 21262 21548 21668 21638 21447 21938 21184 21773 20940 22423 20919 22210 21045 21815 21091 21547 21645 21623 21463 21652 21212 21927 20627 22446 21083 22272 21072 21861 21082 21703 21600 21746 21352 22089 20890 21796 20931 22313 21144 22087 21317 21591 21290 21366 21789 21587 21433 21828 21238 21791 20846 22247 21156 22177 21144 22036 21143 21840 21480 21437 21399 21377 21978 21620 21367 22128 20851 21844 20741 22497 21204 22096 21416 21431 21230 20918 22813 20889 21948 20960 21448 21495 20664 22889 20403 22155 20105 23107 20765 22477 20577 22538 20952 21649 22097 21072 21722 20397 22917 21120 22204 20776 22605 21235 22052 20983 22432 21430 21456 22807 20400 21845 20249 23142 20679 22452 20658 22308 21243 22273 21859 21572 21819 21668 22152 21424 21955 21211 22478 21264 22210 21287 22473 21519 8320 9441 12009 12233 13728 13433 14959 14594 15410 14752 29514 27072 26383 24896 25005 23595 24160 23195 23722 22932 23229 22455 23193 22407 22805 22492 22535 22101 22674 22135 22550 21813 22620 21891 22705 22305 22535 22029 22276 21679 22321 22042 22062 21735 22128 22160 22220 21585 22437 21989 21896 21696 21929 22204 21962 21764 21949 22100 21915 21668 21985 22059 22026 21725 21857 22028 21996 21565 22080 21831 22200 21464 22254 21673 22081 21376 22248 21594 22483 21072 22436 21266 22792 21269 22273 21306 22663 21094 22225 21319 22548 21547 22233 21760 21974 22032 21920 21627 22073 21832 22105 21431 22263 21453 22777 21272 22379 21281 22494 21848 22115 21892 21859 22184 21927 21509 22076 21725 22496 21208 22511 21177 22675 21354 22256 21783 21984 21949 22200 21787 21872 22032 22295 21446 22616 21141 22795 21215 22296 21604 22212 22151 21921 21541 22380 21617 22645 21397 22119 21634 21958 22260 21834 21570 22506 21335 22745 21351 22050 21879 21856 22155 22101 21408 22424 21371 22535 21931 22103 21763 22061 21619 22616 21184 22181 21852 21849 22288 21835 21612 22301 21528 22833 21054 21963 22016 21349 22864 21512 21592 22691 20770 14501 15312 15427 17088 16277 17060 19307 16724 18108 27669 25420 26519 23603 23211 24423 21748 24558 22132 22481 23166 21411 22842 23095 21603 22728 21504 22204 23260 21312 21859 22536 21026 23655 20752 22001 22317 21079 23426 21420 21441 22922 20707 23116 22156 21380 22553 20887 22918 22653 21270 22359 21517 21349 23584 21472 22522 22038 21692 22261 22069 21389 22485 21547 22423 22132 21837 21832 22316 21537 22721 21543 22055 22204 21799 22268 22167 21617 22019 21808 21933 22419 21796 21737 22400 21546 22208 22080 21892 21871 22072 21838 22649 21447 22111 22023 21875 22129 22472 21764 22461 21490 22049 22441 21673 21696 22479 21761 22104 22292 21979 21745 22301 21674 22033 22247 22022 21879 22461 21486 22289 22118 22005 21577 22533 21411 22311 22258 21936 21624 22613 21234 22497 21864 22019 21549 22619 21312 22695 22016 22088 21531 22596 21260 22690 21864 22139 21569 22669 21437 22916 21578 22069 21835 22202 21646 22887 21380 22763 21861 22276 21529 22679 21202 22319 21835 22040 22185 22027 21664 22609 21421 22334 22082 21944 21629 22561 21341 22977 21400 22326 21877 22231 21611 23073 21399 22279 21916 21952 22048 22480 21496 17911 18112 19061 19716 20017 19629 20556 19770 20529 20571 25003 23005 24055 22288 23413 22575 22793 22069 22913 21635 23175 21942 22613 21849 22643 21726 22981 21944 22349 21911 22426 21744 23057 21548 22336 22186 22056 22216 22543 21754 22471 21863 22058 22319 22293 21828 22570 21751 22053 22439 22261 21709 22536 21351 22757 22134 22144 21705 22537 21420 22880 21601 22240 22169 21932 22160 22513 21555 22361 21840 21783 23072 21959 21603 22893 21078 22066 23085 21234 21741 22299 20832 23653 21755 21595 22193 21763 21190 23788 21384 21847 22735 20992 22272 23542 21068 22292 22551 21313 21669 23578 21081 21392 22580 21258 21877 23670 20953 21968 22295 20864 22903 22884 21105 21848 22624 20842 22401 23245 20938 21848 22660 20880 22518 23365 20890 21699 22461 21666 22497 22169 21804 21788 22434 21562 22470 22261 21920 21802 22443 21583 22443 22391 21673 21768 22509 21990 21888 22448 22123 21907 22087 22127 21879 22345 22238 21658 22218 22229 21924 21725 22743 21967 22120 21621 22599 21584 22161 22279 22231 21978 22311 22080 21911 21974 22837 21793 22049 21778 22675 21465 22151 22209 22452 21355 22173 22071 21894 21970 22916 21732 22183 21548 22665 21491 22614 22272 22045 21664 22441 21953 21928 22149 22784 21373 22273 22017 22066 21728 22967 21860 22156 21525 22689 21672 21957 21837 22897 22062 22020 21543 22376 22057 22391 21477 22663 22407 22592 21306 22365 21653 22608 21850 21982 21683 22798 22340 22405 21265 22359 21734 22832 21494 22088 22096 23009 21582 22338 21597 22759 21815 22161 21563 22928 22063 22105 21440 22375 22023 22264 21391 22280 22250 22801 21548 22145 21793 22758 21385 22285 21944 22999 21635 22330 21425 22694 21696 22087 21939 23084 21767 22081 21648 22641 21847 21973 21911 22921 21707 22249 21800 22663 21473 22032 22291 22886 21397 22338 21643 22792 21641 21972 22045 22766 21556 22220 21504 22717 21697 21866 22088 22944 21835 22129 21545 22657 21462 22173 22408 22742 21376 22227 22197 22124 21529 23085 22007 21737 21833 22948 21149 21914 23197 21825 21401 22487 22193 21050 22978 22843 21170 22113 22261 20896 23393 22241 21105 22374 21781 21288 23579 21673 21540 22935 20743 22551 23300 21159 21834 22362 21180 23516 21028 22000 22368 21064 23428 21475 21576 22792 20526 23877 21152 21789 22471 21011 23328 21286 21981 21973 21666 23432 21080 22571 20617 23227 21223 21769 22445 21632 22835 21531 22405 21735 22930 21517 22117 22117 22254 22315 22016 22208 21735 22528 21749 22101 22201 22345 22030 22083 2908 5988 8857 9047 10963 10585 12541 11773 12788 12083 33267 30128 29119 27082 27652 25458 25984 24288 25395 23876 24465 23656 23872 23448 23547 23648 23181 8231 10572 12397 13619 13949 15657 14609 16167 15383 33351 31139 29319 27848 26699 25873 25527 24796 24890 23726 24853 23324 24003 23824 23357 23347 23780 22650 12884 12467 16311 15680 17441 16695 17489 17293 17924 31609 29959 27185 27488 25506 25389 24919 24313 24068 24256 23097 24000 22880 23441 22919 23127 23064 14517 14619 17661 17287 18744 18776 19136 19260 20450 18890 29223 26739 25610 24914 24706 23319 24260 23462 23643 23149 23395 22643 23769 22513 23302 22704 23184 18081 19684 19091 20806 20176 20631 20593 21476 20267 21839 24843 24681 23416 24152 22747 23563 22859 22927 22913 23159 22080 23344 22461 22564 22712 22988 21980 23148 22430 22294 22745 23031 21847 23021 22343 22539 21923 23015 22213 22320 22414 23197 21888 22749 22668 22605 22160 23315 21957 22601 22965 22805 21554 23344 22156 21728 21820 23063 21910 21575 22908 23091 21036 23169 23230 21521 22759 23728 21721 21327 23597 22142 20902 22740 22324 21816 21292 23246 23056 21463 22451 23947 21664 21212 23404 22643 21591 21513 23018 23274 21117 22509 23698 22120 21196 23787 21847 21306 21204 23081 23440 21815 21593 23444 22304 21845 22770 22169 22303 21740 22766 22460 22132 22245 22906 22094 21965 22461 22467 22256 21918 22555 22760 21872 22530 22738 22801 21858 22845 22087 21946 22135 22591 22221 22027 22285 23043 22425 22075 22519 22580 21739 22104 22394 22869 21921 22328 22439 22716 21463 22640 22109 22905 21737 22545 22533 22518 21662 22937 21811 22516 21421 22880 22057 22355 21974 23153 21984 22153 21934 22853 21658 22479 22036 23208 21511 22323 22257 22605 21576 22279 22087 23142 21701 22343 22154 22883 21631 22183 22064 23429 21660 22464 21867 22816 22120 22285 21850 23072 21857 22087 21987 22862 22118 22329 21803 23168 21783 22320 21730 22804 22343 22409 21440 22769 22133 22739 21508 22561 22320 22669 21544 22394 21889 23027 21959 22479 21527 22569 22597 22528 21728 22069 21941 22951 21997 22800 21946 22137 22087 22728 22195 22148 21623 22842 22117 22528 21679 22615 22520 22438 21934 22039 21881 23051 22064 23073 21798 21557 22336 22960 22633 21957 20983 22535 22732 23760 21322 21641 21013 21991 23085 22499 22343 21751 21100 22736 22688 23537 21481 21005 21252 22774 23602 22523 22889 21760 20686 21964 22721 23827 21763 21974 21433 21297 21955 22391 22760 21986 22377 21826 22124 22040 22673 22555 22266 22021 21977 21862 22480 22355 22707 21952 22170 21904 21960 22025 22660 22433 22364 21972 21957 21750 22643 22177 22838 21881 22199 21696 22267 22119 22680 22445 22453 21930 22489 21436 22272 22131 22965 22023 22923 21685 22217 21431 22464 22211 22784 22369 22388 21600 22411 21417 22425 21955 23084 21993 22963 21889 22373 21730 22176 21760 22803 22287 22705 22112 22407 21601 22320 21617 22291 21765 22929 21986 23164 21786 23032 21632 22394 21745 22082 21662 22082 21659 22614 21856 22866 22157 22681 22098 22901 22268 22793 22327 22690 22416 22708 22224 5165 7351 9602 10176 11538 11625 12793 12818 13988 34136 32650 30685 29964 27744 27713 9145 12610 13134 14904 14875 16037 15802 16683 16320 34730 32007 29831 27810 26784 25432 12260 13710 15221 16193 17160 17258 18432 18565 19465 19212 31648 29480 28226 26995 26759 17747 18325 19870 20016 21106 20502 21339 20547 21444 20410 29712 27393 27387 25449 26028 24681 21402 20525 21952 21240 21896 21347 21790 21671 22266 25944 25726 24523 24645 23848 23970 23191 23577 23399 23283 22792 23005 22762 22979 22664 22936 22752 23064 22584 22700 22719 22739 22253 22662 22223 22571 22076 22648 22237 22631 22055 22480 22100 22470 21989 22582 22113 22535 21783 22559 21866 22619 21842 22757 21897 22673 21913 22888 22187 23069 22685 23181 22614 23219 22631 23248 22529 22697 21692 22456 21692 22486 21693 22542 21924 22690 22050 22936 22077 23108 22289 23179 22505 23196 22230 22823 21717 22583 21556 22667 21693 22553 22215 22746 22499 22736 22535 23015 22598 23019 22258 22823 22184 22672 22160 22556 21838 22250 21767 22183 21997 22425 22385 22739 21869 22912 21891 23226 22215 23525 22528 22964 22314 22804 22403 
