# Supplementary material for: An Active Feature Selection Strategy for DWT in Artificial Taste
Source: Hindawi journal article supplement (doi:10.1155/2018/9709505), 2018-01-01
Supplement: f1 [file 9709505.f1.zip › oolongTea-med-2.txt]

43456 43468 43480 43472 46 10514 18116 19661 20873 21389 22226 21385 22592 22288 22400 22049 23158 22136 22567 22699 22641 21798 23136 22332 22200 21837 23040 22020 22051 22980 23208 21752 22657 23703 22332 22352 24016 22094 22194 23760 22257 21389 23593 22428 22158 21904 23223 22775 21725 23052 23609 21721 22504 23296 22281 23018 22860 22954 22272 23319 22447 22512 22766 22602 22259 22835 22588 22593 22254 23176 22487 22555 22599 23314 22279 23019 22900 22880 22553 23493 22071 23168 22784 22840 22246 23424 22217 22492 22710 22885 21910 23440 22149 22756 22615 23060 21899 23608 22212 22665 22709 22951 21937 23072 22218 22648 22332 22897 21750 23372 22083 22679 22598 23008 21860 23427 22261 22715 22850 22906 22205 23573 22251 22809 22444 23430 21999 23481 22476 22800 22770 22881 21929 23301 22254 22676 22605 22965 21962 23256 22311 22531 22797 22856 22016 23292 22216 22550 22344 22920 22022 23033 22539 22412 21970 23044 21965 22273 22795 22023 21719 23207 21944 22049 23109 23303 21504 23351 22979 21781 23200 23111 21621 23279 23346 21831 23159 23535 21605 23242 22934 21844 23240 22725 10214 16791 18633 18528 19758 19086 20071 19860 19915 20245 29568 25272 24952 23524 23401 23080 23511 22438 23284 22813 23049 22706 23239 22488 22896 22631 23108 22011 23359 22426 22772 22652 22896 22344 23162 21991 23200 22239 22840 22501 23044 21874 23533 22104 22961 22832 22958 22295 23572 22217 23139 22901 22951 22404 23595 22183 22961 22591 22925 22088 23607 21878 22871 22728 22992 22272 23415 22121 23290 22676 23092 22292 23549 22153 22993 22678 22583 22170 23479 22187 23011 22725 22674 22592 23383 22385 22935 22748 22803 22438 23349 21922 23154 22580 22518 22593 22785 21843 22974 21991 23022 22608 21943 22263 22762 21283 22789 22474 21617 22624 22502 21312 23772 22150 21911 23697 22064 21633 23745 22179 21684 23666 22289 21591 24055 21984 22103 23765 22381 23065 22744 22515 22758 22905 22095 23045 22765 22328 22729 22619 22432 22866 22029 22980 22420 22521 22689 22851 22269 23396 22456 22861 22712 22762 22455 23355 22004 23075 22642 22683 22514 23288 21966 23226 22408 22768 22503 22985 21905 23296 22208 22710 22343 23319 21901 23218 22592 22692 22433 23079 21865 23329 22177 22865 22448 23344 21857 23377 22424 22735 22540 23073 16957 20107 19888 21216 20587 21472 20502 21829 20672 32018 25204 24289 23201 23761 22551 23252 22656 22992 22314 23225 22321 22839 22515 22839 22274 23051 22190 22894 22521 22585 22544 22928 22185 22752 22728 22828 21681 23255 22359 22152 22951 22394 21693 23288 22123 22332 22844 22202 21926 22951 22384 21872 23183 23149 21578 23268 23034 21760 23192 23627 21664 23079 23469 22048 22888 23168 22283 22715 23221 21975 23217 22732 22501 22835 23029 22162 23043 22916 22678 22753 23097 22081 23090 22576 22547 22676 23178 22064 23176 22504 22588 22567 23051 21942 23174 22392 22681 22582 23110 21937 23191 22161 22765 22390 22887 22242 23127 21952 23100 22256 22809 22231 23080 21826 23255 22178 22805 22531 22979 21839 23367 22072 22604 22651 22955 21796 23403 22000 22872 22626 23026 22180 23368 22069 23277 22677 22589 22435 23390 22293 23005 22781 23180 22215 23505 22096 23054 22641 22714 22389 23091 21952 23185 22134 22673 22399 22709 22620 22786 21998 23244 22213 22703 22800 22397 22236 23479 22106 22993 22864 22432 22700 23085 21559 23303 22081 22416 22566 21822 22743 22464 21381 23879 22125 22162 23720 22243 22113 24064 22145 22794 16677 19118 21302 21398 20581 22085 20962 21479 21700 21337 25416 24096 22156 23519 22701 21617 23181 22563 22609 23048 22812 22380 23424 22297 22885 23028 22816 22481 23267 22171 22894 22912 22513 22741 23088 22121 23017 22173 22494 22560 22976 22254 23015 22039 22883 22409 22645 22488 22857 22005 23429 22256 22724 22752 22890 22108 23575 22054 23109 22581 22604 22573 23208 21858 23153 21984 23092 22236 22926 22162 22969 21865 23505 22167 22863 22672 22722 22454 23123 21933 23325 21913 23161 22164 22636 22561 23077 22242 23461 21860 23280 22249 22583 22276 22572 22647 22976 21888 23529 21986 23172 22481 22573 22273 23057 21822 23248 21961 23081 22135 22605 22592 22826 22170 23392 21873 23137 22297 22702 22389 22477 22550 22727 21841 23380 22300 23034 22730 22481 22602 22851 22109 22779 21957 23040 22200 22208 23466 22436 22396 23504 21401 23310 22005 22511 22187 21621 23765 22313 22898 23542 21496 23424 22212 22449 22291 21530 23665 22228 22318 23721 21494 23215 22663 21801 22787 21701 22901 22311 21632 23991 21905 22926 23144 22216 23045 22084 22999 22249 22531 22940 22689 22653 23112 22027 22949 22297 22691 22458 22432 22892 22595 20120 22231 21321 22422 21828 22258 21773 22048 22359 26889 23596 23612 22132 23248 22140 23335 22232 22672 22637 22325 22397 23382 22029 23216 22261 22871 22248 22678 22680 22896 21870 23509 22115 23121 22624 22688 22284 22941 22170 22953 21825 23543 22109 22814 22632 22599 22386 22725 22436 22852 21887 23544 22114 23284 22329 22753 22073 22788 22464 23012 21848 23491 22025 23163 22275 22848 22302 22597 22798 22799 22272 23345 21778 23236 22007 23235 21952 22895 22576 22645 22528 23073 22006 22922 21820 23496 22039 23141 22534 22552 22328 22542 22666 22804 22255 23314 22022 23119 22073 22888 22414 22609 22493 22890 22130 23477 22087 23131 22423 22581 22336 22491 22144 22753 21899 23431 22363 22840 23149 21984 22786 22633 22105 22717 21410 23415 21957 22425 23553 21716 23005 22360 21808 22605 21200 23701 21492 21730 23772 22214 22639 23525 21492 23267 21832 22573 22357 21532 23720 22140 21562 23992 21767 23120 22850 21856 22832 21724 22569 22280 21536 23862 22384 22633 22881 22246 22978 22080 23133 22344 22466 22884 23162 22485 23131 22030 22892 22404 23067 22342 22572 22787 22505 22670 22721 22350 22651 21971 23425 22377 23072 20740 21930 22075 22364 22304 22391 21815 23020 22080 22759 23399 22785 22620 23192 21984 23031 21831 23306 22201 23053 22553 22685 22519 22903 22134 22941 21973 23420 22122 22648 22708 22811 22348 23376 21847 23140 21773 23343 22100 22760 22649 22822 22230 23410 21692 23268 22031 23031 22061 22720 22749 22720 22466 22988 22010 23043 21816 23272 22050 22859 22618 22647 22394 22812 22304 22988 21858 23477 21916 23255 22391 22632 22428 22903 22211 22830 21853 23453 22276 23150 22538 22564 22404 22861 22062 22915 21778 23236 21995 22868 22583 22694 22275 22999 22179 22920 21863 23630 21980 23056 22615 22742 22487 22935 22053 22934 21916 23332 22282 22647 22658 22618 22560 23050 21960 22996 21969 23201 22163 22660 22747 22547 22491 22825 22411 22726 22134 23322 22080 22963 22657 22400 22592 22914 22273 22802 21993 23347 22049 23019 22587 22235 22556 22428 22536 22580 21687 23745 22134 22663 23316 21751 22744 21795 22681 22275 21739 23964 21546 23318 22136 22590 22436 21717 22503 22409 21409 23936 21892 23349 22544 22355 22294 21474 23735 22115 22854 23262 21666 23310 22152 22327 22336 21560 23536 22436 21684 23918 21666 23235 22537 21996 23028 21916 22694 22340 21481 24036 21788 23229 22835 22162 22774 22226 23296 22101 23012 22578 22627 22397 22405 22789 22833 22248 23310 22144 22989 22154 22792 22252 22509 22992 22837 22613 22981 21989 22797 21959 23184 22048 22954 22509 22588 22360 22529 22921 22660 22560 23036 22034 23032 21898 23293 22043 22984 22752 22344 22450 22533 22628 22738 22083 23356 21896 23197 22164 23081 22067 22830 22683 22602 22445 22874 22235 22829 21796 23428 22041 23089 22210 22960 22134 22632 22650 22748 22369 23108 22024 22968 21909 23273 22089 22854 22660 22697 22376 23014 22071 22903 21736 23523 22101 23079 22540 22546 22263 22752 22450 22955 22265 23098 22100 22898 21993 23296 21904 23138 21844 23297 22208 23152 22115 23020 22016 22765 22614 22660 22236 22678 22615 22814 22395 22770 22545 23033 22112 23301 21702 23140 21851 23325 22044 23244 21991 23238 21540 22848 22669 22681 22295 22564 22680 22877 22368 22711 22439 23097 22231 23224 22022 22791 21706 23464 21681 23273 22035 23301 22016 22810 22570 22536 22221 22549 22749 22720 22612 22948 22339 22806 22330 23183 22055 22808 21936 23382 21925 22986 21904 23401 22132 23061 22231 22889 22176 22886 22648 22662 22281 22519 22793 22533 22519 22567 22754 22663 22459 23090 22097 22712 22243 23268 21750 22791 22016 23682 21360 23008 21427 23824 21946 14736 16789 18770 18432 19002 20418 19094 19692 18954 41774 27154 25446 23355 23831 23056 22022 24096 21813 23186 21556 24186 22123 23493 22564 23063 22257 22727 17971 18780 20398 19921 22171 20246 21632 20384 22108 32867 26118 24231 23072 22912 22264 24224 21932 23567 21843 23622 22384 22843 23004 22567 22856 22578 9588 18998 20922 20732 22390 21158 22109 21366 22657 21461 28750 23956 24144 22743 23348 22392 23350 22617 23107 22646 22991 22377 22760 22913 22484 22720 22642 16896 20933 21636 22029 22103 22272 21968 22592 21808 22408 24814 24099 22471 23418 22295 23496 22267 23240 22213 23335 22183 23472 22269 23290 22264 23287 22432 20984 21453 22668 22097 22571 21824 22624 22446 22391 22023 23695 23104 22990 22615 22821 22675 22393 22442 23079 22313 23040 22231 23311 22016 23056 22012 23440 21982 23136 21874 23473 22076 23190 22429 22849 22218 22723 22661 22641 22357 22741 22565 23148 22339 23351 21845 23076 21882 23631 22018 23269 22080 23085 22187 22919 22648 22656 22395 22477 22615 22742 22442 22599 22579 22752 22104 23449 21840 23027 21860 23239 21751 23203 22304 23030 22039 22929 22597 22651 22292 22621 22661 22826 22326 23131 21961 23032 21917 23343 22330 23136 22315 22938 22127 22854 22642 22432 22311 22513 22789 22659 22465 22508 22816 22636 22539 22697 22563 22756 22240 23304 22021 22881 22007 23273 21844 23104 21884 23496 22240 22829 22952 21953 22592 21849 23264 22297 22734 22857 21944 22459 21590 24038 21404 23305 21434 23104 21976 22280 23361 21768 22855 21472 23485 22238 22901 22818 22348 22340 21524 23898 21580 23233 22324 22486 22127 22121 23796 21723 23176 21668 23192 22592 22503 23154 21825 22528 21606 23206 22436 22552 22953 22123 22825 21996 23338 22091 22994 22387 22856 22328 22551 22831 22384 22756 22318 22403 22633 22066 23280 22155 22986 22490 22667 22365 22584 22891 22589 22566 22844 22323 22838 21972 23399 22313 22964 22577 22490 22333 22535 22709 22921 22263 23296 21885 22992 21921 23319 22496 22912 22597 22565 22416 22678 22513 22868 22089 23340 21881 23156 21765 23349 22115 22683 22573 22893 22404 23043 22203 22872 21940 23484 21853 23159 22135 22914 22002 22886 22560 22584 22255 22651 22727 22888 22395 22923 22337 23073 21768 23510 21977 23104 22151 22842 22257 22693 22604 22861 22327 23046 22185 22915 22016 23389 21547 22892 22528 22515 22293 23068 22060 23008 21786 23463 21863 23270 22528 22609 22264 22708 22492 22766 22293 23277 21793 23092 21863 23248 22188 22960 22488 22578 22381 22624 22454 22720 22160 23330 21892 22970 21931 23296 22151 22983 22400 22711 22208 22485 22813 22704 22405 22899 21817 22735 21923 23767 21568 23258 21811 23379 22136 22131 23616 21869 23043 21707 22807 22197 21825 23888 21336 23309 21444 23556 22099 22041 23631 21731 22888 21733 23145 22266 22036 23769 21415 23106 21408 22784 22131 21735 23744 21834 23059 21682 23243 21597 22336 23144 21834 22804 22244 22880 22679 22552 22659 22500 22746 22397 22966 22327 22810 22080 23205 22251 22913 22545 22272 22563 22414 22985 22592 22624 22758 22435 22748 22321 23132 22043 7304 16414 18826 18453 19837 19537 20341 19553 20480 20192 31872 25664 24346 23881 23432 22841 17456 19433 20873 20464 21923 20601 21870 20632 22256 33389 25590 24104 23668 23025 23457 16728 20834 20663 22619 21457 22624 21684 22068 21754 22161 25305 24050 22803 23897 22255 17273 20486 22331 21587 22347 22257 22138 21882 22647 21681 25649 22811 23942 22365 23522 22583 21708 21980 22528 22400 22596 21696 23287 21979 23080 24714 23339 22666 22784 22591 23097 22001 23623 22336 23213 22535 22776 22306 22857 22585 22956 22070 23488 22044 23149 22302 22681 22457 22592 22676 22788 22272 23228 21899 23143 22215 22944 22272 22578 22845 22743 22503 23288 21964 23040 22064 23047 22244 22421 23008 22544 22138 23874 21627 23280 22674 22176 22552 21667 22403 22452 21226 23978 21981 22144 23691 21795 23110 22421 22264 22456 21166 23744 22042 22304 23740 22320 22592 23552 21460 23222 21975 22274 22375 21526 23696 22288 22421 23777 22192 22707 22915 21920 22983 22089 23000 22265 22468 22935 22695 22561 23080 22147 22839 22368 22465 22503 22444 22517 22748 22072 23309 22196 22884 22753 22464 22528 22711 22272 
22645 21540 21735 21269 21941 21680 22025 21543 22166 22052 22311 22160 22327 22331 22077 21897 21666 21025 21020 21063 22008 22320 23447 21747 21941 21117 20887 20921 21649 22359 22522 22715 21441 20832 20914 21111 21488 21871 20793 21928 21404 21583 21125 22302 20971 21569 21532 21711 20848 21843 21275 21649 20977 21798 21352 21542 21434 22076 20777 22003 21687 21741 21177 22188 21053 21516 21707 21872 20976 22107 21152 21272 21441 21831 21337 21384 21532 21526 21189 21833 21292 21402 21582 21722 20777 21828 21979 21335 21518 22742 21085 21573 22539 20960 21392 22895 20901 21963 22865 21200 21636 23035 21248 21084 22935 21728 21342 23270 21427 21880 23274 21621 21939 23269 21464 22021 23165 21286 22280 22033 21714 21995 22302 21516 22365 22145 21836 22124 22373 21514 22115 22363 21891 21804 22589 21608 22182 22180 21891 21725 22393 21608 22343 22074 21950 21563 22548 21520 21955 21981 21767 21488 22579 21529 21948 22166 22152 21334 22702 21527 21963 22024 22233 21310 22459 21629 21760 21938 22056 21318 22535 21568 21864 21601 22201 21271 22285 21628 21787 21704 22052 21444 22327 21732 5156 6987 10155 10489 12893 12480 13431 13617 14072 13613 34457 28756 27138 25547 24305 23483 24284 23116 23066 22991 22887 22224 23213 22074 22509 22470 22605 21704 22951 21936 22153 22496 22412 21657 23232 21795 22044 23075 21941 21549 23608 21451 22315 23011 20503 21770 21822 20337 22027 21536 20480 21894 21670 20329 22055 22199 20631 21899 22112 20510 21941 22039 20689 22114 21440 21328 21466 21612 20992 21822 21348 21303 21600 21889 21049 21889 21703 21335 21686 22065 21522 22435 21824 22411 22355 22579 21941 22707 21959 22224 22083 22280 21785 22432 21409 22794 21745 22171 22284 21617 21731 22873 22124 22217 22120 22188 21696 22860 21625 22368 22204 22083 21900 22627 21403 22311 21880 22065 21920 22747 21437 22472 21891 21851 21819 22306 21341 22443 21639 22091 21781 21995 21851 22285 21331 22387 21521 22055 22004 22104 21362 22701 21491 22283 22172 21916 21877 22473 21479 22400 21933 21735 21918 22133 21560 22169 21638 21952 21741 22060 21353 22246 21357 22047 21824 21082 21998 21682 20760 22528 21570 20945 21906 21991 21101 22029 21809 21156 21888 21728 20715 22585 21586 20940 21792 22065 20905 22072 21813 20884 22314 10674 9127 13111 14539 15008 16424 16066 16384 17179 17017 34348 29660 26463 24801 24277 23271 22756 23508 22304 22479 22656 22541 21868 22812 21860 22119 22429 22462 21777 22983 21753 22276 22319 21777 21640 22716 21787 22253 22180 22434 21469 22912 21704 22129 22146 22329 21392 22813 21616 22113 21484 21389 20629 21596 21013 21316 21314 21575 20724 21916 21088 21284 21008 21601 20920 21580 21199 21332 21242 21680 20890 21893 21085 21467 21330 21660 20952 21679 21323 21534 21154 21743 20936 21710 21267 21474 21314 21543 20943 22009 21205 21226 21720 21666 20926 21929 21165 21287 21586 21624 20837 21957 21258 21168 21975 21404 20738 22516 21415 20678 22544 21344 20697 22872 21235 21092 22809 21200 21227 23213 21543 22284 23594 22055 22274 23628 21792 22682 23083 21316 22656 22728 21048 22716 22005 21417 22432 21523 21891 21997 22313 21412 22396 21969 21639 21937 22073 21536 22068 21667 22067 21667 21755 21978 21788 21367 22565 21389 22184 22199 21902 21789 22528 21200 22267 21728 21765 21737 22209 21593 22193 21339 22177 21547 21771 22000 21918 21508 22669 21255 22214 21873 21993 21744 22468 21199 22359 21688 21794 21839 22174 21474 17955 18265 19826 19146 19789 20023 20232 19644 21079 19754 25875 24597 23691 22628 23537 22189 22637 22342 22037 22064 22408 21328 22592 21788 22059 21981 22476 21457 22509 21507 22091 21770 22019 21714 22199 21383 22593 21681 21889 22040 22081 21511 22538 21626 21912 22171 22247 21872 22577 21522 22241 22045 21906 21979 22235 21149 22347 21764 21554 22158 21696 21686 22070 20818 22876 21450 21321 22951 21721 20960 23379 21206 22057 22639 21116 22343 21972 21400 21889 20776 22892 21482 21389 23100 21207 22200 22583 21083 22558 21115 22260 21648 21081 22505 21608 22128 22153 21900 21936 22250 21591 22143 21508 22321 21678 21669 22203 21991 21670 22535 21659 22244 22083 21775 21855 21952 21915 22107 21424 22447 21843 22203 22071 21920 22026 22320 21465 22192 21309 22416 21570 21895 22213 22038 21805 22552 21419 22475 21705 22083 21577 21848 21924 22189 21461 22820 21268 22549 21456 22187 21641 21991 21938 22114 21407 22659 21298 22409 21828 21965 21549 21947 22032 22199 21240 22743 21495 22221 22048 21807 21826 22202 21644 22045 21521 22643 21643 22224 22158 21933 21792 22306 21389 22240 21275 22519 21537 22019 22180 22077 21812 16441 17544 19563 19265 20256 19712 20195 20579 20503 20533 25864 23567 23340 22221 23083 21953 22475 22432 22149 21979 22381 21542 22315 21542 22328 21693 21800 22487 21732 22068 23211 21090 22497 22009 21293 22148 21155 22528 21649 21188 23303 21207 22403 22701 20973 22166 21043 22343 21687 21156 23330 21149 22608 21703 21601 21709 20892 22948 21557 21582 23232 21056 22562 21784 21588 21616 21125 23138 21506 22211 21973 21957 21725 21757 22029 22096 21767 22495 21363 22215 21581 22163 21785 21768 22368 21812 21920 22140 21635 22085 21466 22577 21682 22145 22160 21867 21723 21991 22095 21931 21460 22576 21920 22108 22018 21785 21863 22087 21569 22183 21199 22614 21669 21972 22174 21863 21824 22333 21414 22131 21316 22461 21566 22033 21985 22091 21705 22500 21305 22359 21260 22531 21535 21977 22059 22145 21783 22422 21281 22360 21580 22108 21696 21849 21992 22168 21432 22712 21297 22453 21726 21800 21800 22215 21581 22260 21193 22601 21561 22096 22037 21877 21784 22048 21669 22135 21399 22692 21335 22208 21995 21976 21817 22474 21145 22439 21248 22453 21586 22276 21988 21766 21778 21936 21924 22019 21388 22638 21356 22289 21828 21916 19473 20299 20937 21520 20835 21815 20608 21666 21141 24360 22981 22333 22405 22344 21577 22804 21844 22365 22036 21936 21792 21851 21727 21965 21397 22613 21569 22152 22471 21393 21947 22293 21064 22193 20820 23064 21292 21936 22857 21020 22294 21623 20974 22257 20936 22680 21440 21312 23053 21104 22315 21462 21745 21686 20785 23182 21426 21991 22746 21047 22373 21246 22359 21638 21175 23164 21009 22545 22194 21485 21727 21153 22368 21619 21111 23232 21021 22407 22243 21371 22149 21404 22468 21571 21829 22244 22167 21799 22384 21340 22151 21557 22281 21728 21764 22243 21709 22045 22195 21614 22119 21531 22102 21705 21769 22204 22049 21816 22592 21442 22234 21491 22085 21712 21747 22090 22074 21732 22482 21249 22151 21565 22327 21489 22036 22199 21616 21809 21974 21352 22257 21327 22385 21487 22042 22013 21816 21903 22184 21490 22115 21276 22579 21711 22183 22082 21950 21793 22352 21415 22236 21201 22571 21536 22252 21880 21851 21632 22010 21744 22024 21424 22664 21836 22148 21856 21824 21907 21975 21671 22060 21479 22587 21266 22459 21530 22213 21572 21833 21812 22116 21424 22617 21320 22433 21716 21947 21764 22010 21779 22107 21095 22548 20855 22136 21917 21895 21850 21965 21813 22155 21360 22553 21392 22348 21637 21925 21606 21839 21987 22101 21788 22401 21095 22449 21159 22577 21399 22316 21945 21863 21741 22389 21420 22071 21178 22657 21565 22353 21786 21992 21479 21830 22111 21950 21909 21989 21460 22026 21373 22471 21409 22279 21703 22036 21726 21722 22208 21838 21748 22515 21349 22307 21291 22454 21574 21963 21865 21755 21727 21889 21981 22001 21329 22583 21303 22360 21512 22250 21715 21928 22425 21610 22023 21888 21283 21975 20982 23269 21930 21775 22819 21129 22368 21409 22040 21655 20982 23365 21228 22505 22329 21327 22101 20845 22465 21574 21446 22651 21187 21820 20791 23152 20853 22355 20973 22819 21132 22072 22050 21611 21428 21324 22966 21028 22144 21083 22741 21387 22313 21703 22086 21756 21769 22852 20901 22249 20695 23136 21268 22381 21833 22182 21973 21739 22361 21495 22349 21319 22609 21655 22279 21580 22307 21349 22067 21918 21728 21762 21709 22202 21666 21944 21644 22119 21736 21896 22287 21478 22031 21388 22423 21536 22216 21444 22304 21523 22004 22105 21812 21735 21824 22134 21804 21739 21704 22088 21848 21889 22196 21680 22021 21473 22449 21387 22123 21398 22728 21260 22448 21335 22450 21647 22208 21707 21969 21480 22057 21969 21879 21617 21749 22126 21683 21637 21927 21993 22061 21830 22136 10440 16384 16278 17669 16554 17888 17185 18631 17224 28439 24583 26479 23962 24231 23290 22708 22459 22376 22555 22541 22143 22336 21967 22212 21776 22647 8459 15904 16377 18790 17785 19264 18423 19868 18837 19977 26165 24741 22905 22780 22365 22134 21829 21934 21964 22001 21677 22195 21509 21675 21424 22076 21102 17430 18084 19943 19015 20487 19443 20901 19725 20865 19776 25137 22528 23011 21669 22712 21478 22231 21465 22173 21274 21633 21745 21402 21513 21480 21865 21613 19309 20039 20374 20007 20489 21136 20452 20792 20327 21445 22481 22757 21690 22411 21479 22055 21277 22055 21696 21916 21499 21890 21307 21748 21648 21565 21248 20520 21039 20928 20842 20810 21647 20553 21223 20438 23831 21187 22201 21445 21732 20813 21538 22136 21063 21332 20879 22717 20440 21389 20587 22872 20300 21831 20400 22471 21037 21667 21828 20944 21162 20644 22614 20723 21903 20629 22522 21303 21534 21970 20830 21535 20375 22723 20885 22145 21124 21596 21083 20957 22691 20723 21919 20480 22425 21195 23322 22457 23000 22434 22710 22252 22492 22120 22104 22580 22353 22133 22496 21922 22087 21777 22560 21230 21842 21307 22246 21543 21948 21745 21687 21495 21739 22119 21978 21768 22133 21513 21969 21530 22535 21273 22232 21277 22440 21349 22202 21383 22415 21526 22217 21569 22364 21548 22108 21826 21689 21555 21755 21975 21696 21839 21906 22031 21977 21799 22241 21481 22217 21186 22582 21565 22345 21687 22064 21427 22023 21943 21913 21610 21944 21752 21986 21504 22472 21197 22124 21243 22520 21283 22351 21591 22053 21447 21947 21903 21635 21543 21803 21824 21958 21517 22465 21211 22251 21120 22480 21318 22272 21760 21895 21420 21851 21931 21765 21824 21996 21632 21903 21186 22564 21248 22457 21248 22327 21369 21968 22048 21685 21661 21847 21883 22224 21367 22581 21155 22370 21491 22199 21413 21775 22127 21628 21935 21739 21792 21965 21437 22490 21349 22167 21728 21898 21607 21793 22103 22101 21779 22232 21429 22113 21271 22528 21788 22142 22054 21685 21881 21605 21829 22357 21617 22545 20831 22317 21037 22809 21216 21824 22902 21166 22214 21729 21400 21643 21056 23028 20845 22355 21120 22362 21489 21025 22977 20983 22135 21056 22705 21302 22275 21722 21522 21667 20919 23160 21373 22233 22029 21496 21467 20928 23068 21366 22250 21584 21642 21497 21589 22161 21671 21799 22225 21309 22108 21261 22113 21559 21827 22012 21741 21968 21905 21577 22045 21337 22344 21577 21935 22104 21632 21809 21734 21924 21711 21728 22400 21349 21897 21219 22480 21540 21808 22029 21517 21671 21705 21987 22053 21788 22061 21484 22048 21393 22519 21159 22304 21608 22070 21384 21900 22039 21593 21549 21760 21844 21754 21596 22406 21213 22255 21306 22433 21558 22173 21725 21792 21653 21807 21925 21953 21760 22423 21232 22215 21099 22474 21345 22176 21767 21803 21621 21814 21927 22384 21309 22416 21019 22272 21281 22353 21550 22261 21626 21739 21528 21847 21864 21940 21876 21899 21568 22096 21498 22472 21144 22066 21302 22528 21334 22311 21393 22217 21511 21749 21921 22035 21610 22027 21607 21868 21567 22424 21382 21941 21299 1975 9620 17883 17417 18225 17713 18383 18329 18180 18263 26199 24605 23308 22856 22587 21920 16951 17766 19484 18480 19785 19009 20186 19372 19919 27127 26281 25096 23703 23492 22800 14652 18784 17685 19527 19581 19365 19639 19201 20420 28923 25674 25744 22656 23762 21844 17659 18373 19285 21157 19508 20824 19750 21577 20445 19769 26632 23079 23696 22868 22228 19057 19310 21717 20877 21229 21797 21044 21274 21548 21116 24123 22542 23122 22322 22480 22520 21899 22155 22382 21760 22279 21533 22547 22263 22206 22272 21765 21975 22035 21819 22113 21420 22568 21571 22359 21969 21829 21811 21920 21959 22079 21490 22695 21482 22355 21645 22017 21646 21842 22033 22185 21645 22583 21397 22406 21883 21928 21822 22007 21821 22169 21383 22753 21552 22211 21985 22062 21831 22389 21356 22448 21456 22456 21653 22060 22026 21985 21778 22479 21353 22401 21533 22077 21608 21995 21849 22223 21431 22646 21545 22407 21671 22006 21776 21909 21935 22043 21207 22660 21940 22221 21935 21992 21808 22272 21456 22221 21333 22379 21501 21846 22070 22537 21478 22572 21405 22342 21803 21835 21646 21838 22070 21910 21466 
21788 21872 21428 21411 21239 21625 21241 21624 21312 21931 21671 22139 21920 22165 21882 21811 21521 21722 21219 21607 21463 22085 21681 22341 21392 21889 21348 21710 21164 21959 21874 22071 21671 21745 21132 21685 21595 22313 21805 22431 21411 21999 21490 21643 21095 21929 21457 22161 22019 22017 21849 21785 21285 21792 21272 21676 21536 22272 21655 22469 21507 22343 21379 21827 21447 21625 21224 21917 21776 22199 21912 21837 21509 21848 21216 21384 22280 21436 21575 21963 21780 21219 22179 21492 21559 21697 22036 21305 21808 21671 21714 21513 21980 21312 21925 21612 21781 21543 22026 21352 21897 21685 21927 21297 22144 21463 21576 21597 21859 21325 22119 21243 21927 21640 21760 21533 22041 21244 21973 21455 21579 21770 21816 21096 22229 21391 21639 21535 21864 21184 22240 21674 21713 21445 22005 21388 21755 21542 21788 21241 22054 21332 21761 21700 21808 21410 22009 21494 21655 21765 21977 20960 22213 21819 21198 22083 22332 20911 22455 22031 21145 22241 22415 20919 21912 22720 21575 21798 23051 21152 22064 22810 21364 21367 23124 21228 21511 22789 21348 21499 23029 21191 21544 22345 12925 17669 18603 18791 19424 19752 19239 20057 19674 34311 25575 23320 22427 22423 22048 21767 21971 21993 21328 22232 21810 21432 21807 21966 21271 22179 21925 21740 21879 22153 21403 22144 21600 21587 21750 21792 21231 22157 21496 21703 21640 21654 21466 22032 21267 22248 21405 21603 21927 21808 21262 22294 21389 21660 21846 21904 21034 22243 21366 21643 21786 21873 21177 22284 21458 21637 22002 21923 21216 22389 21271 21680 21776 21945 21104 22276 21482 21675 21905 21804 21225 22291 20826 21728 21938 21731 21335 22294 21464 21747 22004 21916 21444 22329 21414 22084 21975 21521 21918 21967 20743 22448 21836 21096 22130 21485 20888 22594 21306 21106 22230 21097 21710 21946 20688 22159 21465 20899 21718 22040 20751 21846 21674 20722 22344 21614 20585 22380 21652 21442 22208 21581 21840 22091 21744 21737 22128 21594 21847 21957 21410 21843 21829 21435 22021 21455 21861 21572 21478 22021 21635 21224 22285 21563 21736 22002 21827 21395 22308 21762 21813 21929 21661 21584 22316 21447 22129 21804 21694 21682 22274 21513 22010 21892 21799 21682 22346 21408 21984 21816 21813 21635 22249 21270 22017 21863 21820 21664 22320 21309 22094 10940 18344 19735 20517 19835 20988 20560 20678 20644 21093 26147 24148 22400 22085 22060 22058 21272 22287 21849 21693 21893 22127 21305 22201 21691 21655 21750 22018 21261 22183 21610 21577 21768 21957 21128 21997 22296 21318 21978 22419 21070 22431 22317 21184 22173 22402 20857 22528 22164 21159 22386 22946 21315 21779 22784 21573 21509 22954 21288 21815 22858 21635 21032 23113 21696 21461 22535 21542 21722 22132 21837 21696 22236 21549 21812 22016 21623 21604 22210 21257 21627 22135 21879 21702 22315 21728 21824 21953 21749 21849 22149 21482 21980 21992 21655 21713 22168 21540 22048 22053 21829 21842 22089 21344 22128 21750 21591 21728 22032 21197 22168 21607 21680 21697 21957 21320 22081 21412 21777 21625 21638 21547 22049 21223 21793 21579 21719 21642 21856 21132 22232 21335 21699 21892 21797 21304 22375 21323 21721 21810 21799 21125 22360 21371 21644 21846 21842 21207 22337 21461 21990 21909 21874 21746 22151 21257 22231 21452 21777 21783 21868 21462 21911 21216 22122 21463 21639 21843 21767 21318 22354 21453 22039 22053 21575 21900 22351 20760 22430 21489 21254 22056 20982 21828 21706 20472 22626 21226 20780 22407 21536 20736 19004 19417 20874 21471 20359 21473 21676 20288 22062 30795 23196 23202 22112 21100 22515 21393 21755 21702 21304 22135 21525 21572 21918 21613 21381 22159 21611 21536 22185 21656 21451 22234 21005 21849 22097 21642 21889 22040 21464 21967 21740 21553 21984 21932 21262 21974 21479 21675 21616 21626 21600 21948 21236 22241 21479 21522 22039 21724 21404 22327 21593 21997 21857 21699 21737 22136 21242 22176 21597 21605 21724 21733 21573 21911 21221 22264 21382 21767 21878 21773 21743 22051 21241 22049 21186 22141 21286 21672 21936 21782 21600 22221 21296 22181 21516 21808 21593 21722 21739 21795 21234 22440 21340 22208 21776 21875 21672 22096 21148 22147 21261 21990 21396 21591 21876 21788 21636 22177 21259 22093 21361 21740 21753 21698 21762 21861 21261 22311 21499 22098 21814 21531 21696 21747 21081 22023 20982 22367 21367 21333 22669 21407 21902 22283 20877 22329 20718 22574 21097 21661 22791 21492 22033 22421 20901 22416 20721 22159 21216 21075 22839 21489 21848 22802 21065 22557 21563 21315 21764 20736 22612 21395 21377 22068 21437 21864 21893 21460 21906 21401 22070 21586 21632 22097 21710 21878 21933 21388 21863 21484 21866 16791 20104 21340 21792 21387 21771 20998 21779 20984 21782 23891 22305 22374 21906 21920 21848 21471 21984 21427 21952 21429 21584 22002 21769 21772 22209 21338 22120 21344 21990 21608 21587 21792 21744 21383 22386 21395 22154 21677 21670 21642 21686 21525 21951 21156 22424 21393 22116 21632 21666 21649 21646 21850 21805 21458 22420 21202 22212 21287 21884 21575 21593 21721 21873 21403 22285 21223 22155 21271 22017 21412 21658 21962 21943 21717 21959 21271 21965 21161 22379 21497 22099 21771 21658 21664 21721 21622 21863 21387 22314 21312 22072 21448 21868 21511 21591 21991 21835 21714 22119 21151 22157 21460 21760 21522 21619 21847 21847 21458 22288 21365 22220 21566 21576 21760 21546 21705 21769 21198 22681 21269 22147 22183 21072 22018 21299 21412 21711 20681 23049 21062 22160 22244 21073 22277 21133 21675 21588 20518 22676 21273 21168 22745 21344 22124 22259 20868 22370 20788 22587 21487 20802 22455 21423 21293 22848 20987 22538 21747 21213 21890 20804 22255 21664 21697 21995 21491 21881 21783 21460 21835 21536 21961 21643 21456 22148 21703 21880 21724 21562 21739 21367 22235 21574 21874 21920 21476 21872 21569 21872 21771 21437 21223 21145 21928 21497 21489 21600 21433 21857 21589 24064 22822 21565 22000 21995 21664 21745 21825 21616 21770 21294 22307 21511 21979 21845 21696 21824 21845 21513 21879 21200 22034 21447 21782 21911 21601 21788 21938 21528 21974 21133 22346 21365 21788 21963 21959 21719 22151 21316 21998 21181 22277 21561 22048 21685 21566 21800 21752 21504 21970 21208 22413 21196 22119 21660 21732 21563 21552 21771 21932 21400 22360 21307 22165 21598 21660 21596 21693 21793 21800 21295 22316 21496 22144 21712 21703 21720 21870 21360 21894 21205 22358 21429 22056 21645 21784 21641 21681 21761 21904 21237 22430 21645 22132 21825 21604 21760 21791 21620 21994 21159 22311 21371 21815 21956 21673 21802 21965 21529 21925 21148 22351 21350 22065 21669 21568 21632 21556 21931 21222 21152 22282 21536 22008 21721 21624 21571 21631 21857 21842 21350 22451 21352 22128 21678 21630 21787 21298 21773 21741 20906 22929 21149 22422 21553 21261 21642 20896 22724 21496 21751 22448 20877 22491 21832 21166 21828 20841 22440 20977 21525 22732 20864 22421 20576 22640 21268 21542 22791 21109 21925 22426 20876 22401 20908 21996 21591 20811 22607 21315 21728 22598 21075 22409 21888 21260 21920 20731 22631 21153 21488 22648 21047 21884 21397 21856 21653 21517 22139 21442 21981 21437 21859 21533 21432 22147 21661 21973 21863 21578 21714 21443 22000 21555 21603 22058 21564 21911 21504 21713 21662 21632 22071 21297 21944 21359 22184 20946 21707 22011 21470 21888 21716 21841 21638 21504 22136 21557 22098 21474 21765 21651 21543 22005 21735 21777 21954 21427 21834 21287 22296 21453 22106 21709 21741 21753 21516 21877 21617 21733 22081 21407 22018 21163 22196 21446 21873 21821 21624 21738 21958 21427 21831 21269 22368 21596 22149 21671 21725 21689 21657 21751 21808 21305 22355 21340 22173 21513 21798 21485 21796 21784 21618 21557 21635 21889 21874 21840 21856 21564 21872 21530 22230 21189 21933 21161 22435 21309 22216 21210 22322 21030 22096 21519 21952 21457 21729 21884 21751 21713 21760 21800 21863 21751 21962 21472 21836 21282 22336 21425 22176 21336 22144 21413 22208 21487 21927 21310 21808 21786 21797 21629 21586 21842 21811 21651 22084 21519 21968 21174 22429 21279 22052 21171 22217 21511 22099 21709 21671 21477 21677 21899 21566 21568 21470 21846 21786 21767 21656 21766 21777 21591 22231 21260 21991 21219 22331 21117 22128 21232 22284 21522 22134 21410 22179 21465 21863 21960 21579 21520 21655 22132 21294 21728 21121 22530 21513 22081 21464 21931 21468 16476 18790 18499 19776 18603 21188 19193 20763 18947 32118 24108 23560 22400 22040 21927 20906 22807 21305 22289 21225 22080 21412 21542 22369 21145 21620 8888 19462 19147 20965 19382 21911 20169 21504 20607 20982 27161 23836 23313 21496 22051 20887 22772 21402 22095 21597 21672 21466 21491 21945 21429 21581 21528 15353 19176 20456 20515 21294 21105 21348 20883 21687 21188 25457 22705 22640 21768 22046 21745 21824 21682 21780 21911 21435 21832 21350 22278 21405 21972 21389 18907 19849 21319 21172 21472 21161 21450 21692 21248 30238 23375 22584 21827 21926 21826 21878 21790 21740 21939 21706 21755 21617 21973 21488 21791 21448 22190 20112 21388 21134 22029 21207 21827 21112 22133 21320 24816 21851 22520 21787 22199 21579 21931 21376 21874 21718 21718 21472 21743 21751 21644 21597 21660 21905 21619 21768 21920 21549 21872 21469 22184 21163 22057 21127 22352 21341 22245 21400 21962 21298 21833 21896 21775 21635 21705 21739 22122 21577 22177 21295 22098 21171 22294 21401 22226 21157 22165 21458 21880 21515 21911 21414 21593 21905 21703 21632 21942 21457 21903 21377 22273 21166 22048 21192 22385 21340 22191 21349 22105 21336 21694 21773 21602 21709 21794 21602 21808 21468 22151 21308 21897 21229 22338 21271 22132 21152 22225 21558 22160 21303 22259 21384 22018 21575 21794 21431 21553 21901 21669 21722 21483 22057 21747 21733 21696 21643 21831 21212 22758 20919 22389 21223 21939 21194 21524 22446 21177 21980 20758 22593 21317 22164 21689 21137 21728 20642 22971 21063 22614 21120 22101 21267 21607 22294 21173 21817 20763 22730 21598 21826 22534 20944 21980 20514 22961 21211 22388 21433 21643 21368 21176 22576 21132 22266 20903 22208 21546 21633 22020 21508 21832 21462 22059 21360 21800 21969 21515 21722 21359 22148 21558 22009 21777 21384 21812 21415 22052 21681 21756 22113 21333 21952 21280 22197 21628 22017 21785 21639 21728 21463 21959 21632 21575 22176 21304 22041 21344 21863 21561 21627 21959 21720 21808 21706 21660 21772 21277 22338 21517 22068 21593 21915 21512 21621 21981 21786 21745 21836 21239 22054 21168 22261 21366 22038 21749 21721 21488 21592 21986 21977 21691 22147 21155 21984 21147 22281 21429 22157 21248 22243 21366 21922 21653 21669 21632 21827 21671 21884 21403 22272 21256 22125 21256 22286 21577 22023 21697 21649 21714 21515 21622 21793 21130 22327 21398 22096 21654 21652 21664 21636 21593 21858 21189 22410 21308 22196 21399 21906 21409 21687 21928 21745 21779 21858 21579 21789 21353 22340 21230 22149 21600 21648 21485 21585 21955 21825 21815 21721 21717 21821 21456 22208 21154 22160 21209 22283 21486 21941 21967 21457 21668 21305 22260 21668 21927 21976 21232 21815 20595 22848 21348 22400 21616 21504 21504 20869 22769 21336 22164 21533 21658 21889 20556 22949 21326 22482 21480 21809 21461 20841 22851 21464 22385 22021 20977 22025 20548 22933 21317 22283 21508 21716 21365 21127 22770 21090 22039 21444 22023 21998 21939 21801 21671 21493 21533 21987 21482 21881 21541 22004 21659 21799 22080 21369 21970 21378 22046 21571 21863 21911 21482 21650 21551 22103 21617 13842 17386 19030 19420 19716 20309 19810 20192 19904 20771 26695 24165 22327 22574 21603 9258 18032 19674 20308 20448 21024 21063 20992 20946 20891 28086 23203 23187 21765 22307 21814 18094 20028 20807 21064 21319 20949 21927 20961 21745 28278 23746 22273 21896 22109 21884 18437 20878 20739 21512 20915 22089 21088 21979 21312 21376 23328 22247 21995 21925 21563 19639 20462 21854 21231 21789 21377 21473 21723 21723 21241 23593 21735 22405 21463 21861 21543 21619 21883 21929 21180 22460 21392 22182 21495 21824 21548 21459 21950 21937 21650 22248 21368 22166 21440 21780 21414 21601 21958 21760 21689 22096 21180 22088 21267 22183 21416 21763 21928 21768 21665 21878 21130 22022 21143 22186 21507 21176 22463 21575 21657 22645 20871 22491 21212 21122 22101 20993 21985 21625 20561 23066 21168 21941 22133 21053 22184 21078 21582 21706 20686 22636 21289 21163 22830 21291 22097 22199 20896 22263 20803 22210 21270 20924 22385 21217 21760 22034 21597 21871 21921 21403 21879 21302 22000 21600 21591 22059 21604 21827 22119 21643 21952 21692 21509 21616 21557 21891 21701 21326 22225 21412 22040 21765 21466 
36373 36930 42144 42290 40757 34602 40352 34439 40656 37948 34966 40047 37497 40272 37412 36440 32899 35290 40072 34382 42536 39600 35025 41959 41858 37342 41385 35604 39444 38231 37110 39368 35048 35595 39058 35122 33997 41571 36625 43138 42365 38986 42900 34839 38806 37779 42471 40315 38715 38523 36937 36061 40675 36101 40429 35079 32935 40808 34923 43232 33149 41954 41866 36789 42481 34663 40019 37794 35780 40672 37600 36832 32854 36551 39911 35181 35763 42461 34155 38514 41345 34565 40195 35188 41180 39030 38075 39629 39899 36555 42296 37367 37564 38944 38059 40827 42287 38064 40224 40375 36784 42560 41719 42833 43527 41904 34330 38884 42776 35142 41216 35920 37921 34413 35405 33193 38697 40585 38372 42801 34140 35714 36317 38709 41031 42201 34742 33287 36783 39528 41025 35075 35188 42276 38882 41851 36217 33280 35926 40390 39152 41266 35828 35059 36073 41827 38921 43079 35016 35717 38235 37243 40781 36775 39987 39460 42104 37213 43336 39221 39415 41121 43172 37271 37385 35612 33733 36027 39358 39287 39002 36789 41539 41957 40322 40449 33114 36241 41312 43336 39573 40031 33365 41913 34291 32747 32498 34618 41059 35040 39412 38432 34235 37228 45522 42469 43264 43276 39019 35995 38160 38549 41069 41107 36458 42152 36756 38240 40663 40560 37824 35766 37257 40087 42168 39976 34032 33719 35687 35894 40443 40396 43092 35590 34294 34466 42478 38806 40535 41265 42305 34329 37687 36205 40438 41648 42112 34919 36691 37207 38066 41170 41872 34775 35952 37036 39673 41488 42683 34651 38380 37683 39954 42762 40902 34938 35651 37872 38761 41237 43066 35264 37237 36312 40202 41587 36155 35306 37637 35613 41302 41679 42784 36048 38499 37611 42293 42192 42323 39488 38473 33009 37480 38373 34981 42840 36962 38728 39912 43154 36674 34169 40839 39000 41088 39040 35481 37877 34216 40223 42832 36890 35397 38681 35200 36690 34885 34602 41831 34589 33092 42290 34736 42094 40752 34080 36433 39497 35674 35596 39649 34090 36772 38029 41944 36981 36601 42374 38843 42816 37248 33613 42576 38816 34450 40001 41622 33928 35413 38413 36613 41772 41799 35845 36356 37696 34860 33525 41604 42726 40071 36457 35207 34784 41025 33104 38488 37227 36340 34820 41988 42036 38380 36454 36384 34304 41151 40705 38585 37201 36528 34511 41497 41327 39749 33491 39842 34948 32207 35856 37677 32711 34004 33600 38637 41696 41272 42587 39610 39217 39148 40551 41778 37088 35248 37175 40104 41097 40860 35395 34634 35732 38374 40566 40691 34380 33620 35590 37964 39053 38711 41521 41280 38472 42884 38861 43224 42208 39792 40541 42669 36541 33180 39949 39680 42599 38389 41089 36117 36128 33636 32640 38130 40688 36659 37260 34313 37815 40096 35024 42448 33880 33154 35271 39779 36896 34920 40977 33724 36156 38296 34529 33877 40468 40573 34683 39979 37408 35209 41754 35557 36256 37859 35883 36797 40016 42981 38580 38457 34804 35153 40080 33330 38551 39065 36679 36618 39413 41302 39892 35984 33987 35232 38455 40064 40311 34422 34637 34961 37939 41024 39424 42056 36067 34403 34247 33319 38695 40374 36196 33863 35376 34347 36644 39091 41002 41595 35352 37081 36217 40772 42727 41539 35681 36208 36289 39004 42264 42083 34720 36693 36625 40088 42032 42835 38676 37556 37064 35688 40070 40508 41253 42713 36111 36096 37049 42579 37829 39976 39939 42873 34771 36672 35884 40982 42273 42888 39160 39111 33913 37209 42372 35206 42937 43158 40572 39129 37772 36480 35248 42466 34844 40162 35444 42635 33319 34352 36864 41352 36466 42900 41732 42875 35217 40386 39365 40194 41088 41095 39723 39001 44032 42086 36219 35185 40752 40253 33256 33392 37493 34377 41504 40531 34477 32886 40280 34711 42416 41280 38136 36910 39424 34574 36995 38736 42624 38592 35809 33303 38003 37797 40540 38401 42970 35256 34020 34268 33723 37827 40306 41168 43121 33230 38736 35595 41846 42225 34221 38484 36941 35168 35588 39856 40548 40372 34314 33984 35401 35548 33609 37446 40192 41464 41878 36098 37184 36013 35896 38912 40518 39042 39728 40289 40884 34917 37529 36021 33800 40840 40824 40593 33152 35958 33942 35317 35707 36112 40192 43125 41652 40716 35938 37120 34760 39204 39432 40100 40664 38579 41840 34263 36980 36097 34228 40144 40608 39734 41637 35917 35860 34995 35541 36935 40493 41953 43403 39684 36560 33218 34784 35694 38591 38785 37725 42560 42048 41481 35463 42096 37664 41488 36660 41928 35094 34010 38712 34857 36438 42802 38881 42946 36925 42576 34957 40218 40101 38669 37243 42816 36977 36486 38427 33993 33570 40832 35856 34490 34307 41669 41703 39309 42582 37184 37282 42473 37569 41952 39409 33891 33958 39277 35531 37127 37888 41786 37344 42885 37298 33684 38492 41420 36065 41765 36184 37570 36010 37542 36019 38335 41569 42648 37558 37432 36772 42880 38445 42286 37993 42312 33896 38354 35923 35824 40581 41474 39929 41335 38616 34186 33735 35792 35536 41655 42713 42097 40295 35203 34707 34359 34887 32955 38022 39264 42890 41994 39865 34285 34517 34361 34461 36720 36407 42368 43008 40124 40832 40988 37459 33872 33815 35304 36992 41984 41732 40521 40369 40784 38594 42026 34880 38001 38004 35476 38080 40663 38404 39557 42714 43318 39797 36105 34630 34449 35360 34257 36984 41801 41961 41037 39336 42456 37314 33011 33826 38400 36816 35248 39801 39703 40349 42661 35781 32884 34096 36769 36888 42417 41478 41883 41009 33935 33472 35386 33254 35073 35764 39936 35432 40434 40105 40704 38496 38528 40960 42119 35784 34208 39149 38499 39990 41225 38626 41383 39468 35085 33716 32135 34855 40456 39504 36241 41136 40037 41495 36340 42256 35579 34220 42953 35696 43250 42674 41154 37158 37825 33571 35670 40125 37277 35510 41393 34743 34935 38503 42997 37529 36155 42406 37015 33030 37896 34600 42171 40132 35463 37083 35528 33491 35648 41672 41354 33920 36904 37400 42668 37216 33573 36779 35964 42375 40565 39458 37719 43064 43136 34185 42147 37069 33936 39773 36953 33736 38223 38657 34631 35591 36381 34048 35719 40817 41816 33213 38217 36864 34936 36240 36768 32882 37154 39730 38757 42613 36231 37564 34001 35983 37666 33043 38081 39285 42188 41921 36296 38183 38170 35573 40072 41077 38853 39936 41417 33792 38567 35104 33632 36012 35731 32498 37904 39952 42989 40188 40013 34869 35392 33650 33063 35770 37701 41805 42438 41352 40404 34316 34565 33927 35072 35975 36105 40957 41953 43172 40029 35312 35240 35289 37120 41379 37456 40018 42373 42505 39168 34720 35840 34400 34720 35543 37136 40389 43202 34866 39748 36576 34005 35409 36253 34186 38368 39613 41904 42081 36743 37923 34918 36176 38192 33193 37501 39375 42500 41735 39253 34943 33312 33959 33234 37655 40347 39324 41442 33229 38405 35552 34227 33536 34496 36744 36629 41408 43408 41707 39916 35184 34461 36079 40681 36156 35803 36642 37911 39492 42939 33700 40328 34631 36278 35687 42809 36189 42930 36724 43704 36864 39629 36624 36054 42883 37832 33096 35756 35932 42778 33168 34514 40278 33421 36376 38985 37729 42935 36617 42472 37023 38493 34140 35632 34544 40917 35511 34272 38440 42728 37273 40396 37584 35057 34772 39253 42784 35232 38264 37376 41892 36935 34617 32919 39952 42378 38690 42544 37200 33324 41984 40200 34980 38144 37174 33741 35137 42189 38609 33570 33908 38912 33721 37426 32608 35056 34727 33992 39184 40860 38003 41821 40578 37376 35377 38736 42883 37260 35328 36562 34371 32416 39700 33648 39259 42741 36053 34538 33271 38464 35839 35796 37833 42233 36895 40797 41605 42859 39872 35564 35763 35852 32890 37008 34256 35480 39156 42264 38688 39680 40626 42573 37285 36674 34283 35555 37971 42232 36969 40477 42337 34249 39875 35079 35536 35048 34574 35820 36125 40880 42396 41607 40635 33115 36016 42944 36327 35953 34125 33413 34144 36989 37032 36548 36727 33601 36811 33095 40808 39965 38032 39526 43125 41408 40929 40268 41863 38290 39347 33322 37597 42496 35702 37267 35943 35238 35449 36081 37079 35939 38040 42549 36936 40533 41973 42352 40391 41382 39943 42202 40738 43315 38040 41172 36330 36046 36167 34546 33635 36491 36365 34521 39136 33281 37824 39665 43179 41128 39076 39691 40960 33158 39320 35532 34849 42669 35268 37353 33744 33289 42560 37042 36064 35877 34509 35664 35798 33959 40946 40576 38715 40224 42204 39453 39827 40262 41524 33174 39777 42041 40589 42800 37347 38003 33909 32664 34487 39739 41031 35571 38811 33418 32723 39017 42632 38049 42664 30390 34440 31224 34790 32576 39480 39264 35303 36208 44313 41008 34589 42264 38946 37896 36745 36736 40942 41520 40484 39233 42051 33524 42118 39515 34387 31320 31249 38392 37509 40975 37735 39567 32694 33514 37452 42193 37905 42040 43168 39265 36672 36344 41860 39887 34304 34608 42514 43208 38211 42307 34184 32869 39336 38944 42514 32547 40682 39008 41446 36624 35126 39593 44305 35867 34656 35648 38928 35786 36263 34845 35779 37524 42423 36791 41425 41490 42305 38365 41944 36312 36064 41120 39724 42644 39773 42577 35400 39965 44712 43376 34408 36448 37623 36477 37177 36217 35672 37772 35281 35933 34134 38112 42743 36600 42293 40868 38817 41856 39450 38925 40135 36716 38912 40069 41141 37463 36969 43878 36391 40686 34061 37676 41440 37222 35451 35329 42440 36164 35936 34417 34042 34533 37221 34324 35616 37349 33521 36816 42752 40634 39777 39217 39244 42095 41728 41395 42032 38288 40838 36787 37216 36109 34328 35106 35723 39698 33864 40133 41154 39632 39721 41613 42145 41079 39658 40330 42601 37392 33069 37381 42080 34208 37210 35315 34052 37731 42470 37821 41538 41349 39848 38876 39825 42615 41632 40960 41658 39832 41359 35429 35949 33910 35281 35976 33920 36024 42601 40387 41152 37508 40416 42048 40880 40042 39308 40939 33713 39799 41159 41524 41847 38633 33917 35904 42309 33612 37316 34826 35392 42848 39304 35928 35574 34884 34440 36592 40055 36403 36976 42614 40594 37959 39911 33080 43040 39962 38496 35076 34077 40931 40268 35261 39000 35479 33592 38484 38587 34630 38705 39610 40611 34384 41372 39830 36643 35168 35795 34052 36275 33463 36812 38340 32212 38109 40213 42648 42630 34801 41504 39760 34048 38995 41527 36987 40496 33536 34053 38344 32804 36356 42551 39395 41576 36347 38075 33065 35309 41659 40113 33689 38541 35948 41541 36528 42144 39104 34984 35827 39568 41379 37985 40488 40775 34599 38317 36135 34457 35257 42608 38371 34204 33656 40001 40992 39045 41293 37297 33608 34344 38024 35441 36096 35223 34601 35789 40637 42064 33322 38898 34080 37489 32839 34127 38312 36121 35655 36630 40466 39171 39479 41489 41877 38981 35959 35412 42634 34125 38166 38325 35248 39912 39521 38324 39452 41461 42464 40480 40206 41283 41866 37699 34667 34683 34036 36416 34893 37224 41995 41264 40426 40163 40381 41648 33953 38537 35146 34357 35157 32905 34150 35932 39032 42088 42114 39521 34744 34382 34442 34144 33835 36701 39773 42818 41272 40704 42160 37522 41942 35360 37547 35719 35910 36804 33842 36078 41440 42144 40656 40181 34039 34192 42836 34034 37870 36466 36514 35456 35340 36555 42278 40758 39464 40080 40192 41589 43232 38122 38417 42506 34983 40850 41434 34889 37668 38229 40172 36697 33324 36768 41293 42557 34391 32422 32365 36024 36262 41159 40280 33495 34481 37020 32807 38076 41299 43621 43096 36532 42595 36293 37159 42521 42752 38873 37575 38693 32688 37859 41102 41616 33008 35096 41574 39335 36441 38616 38982 42384 38944 38625 37895 36312 34889 42828 33580 38256 42888 37536 33337 38337 34833 36211 39074 41794 38308 41568 39203 33776 36951 37579 42840 34743 33504 39525 34315 33506 39700 37415 41394 34560 40817 35703 39555 36583 35280 36870 41368 42202 34402 33976 25161 36263 34120 40682 42361 38002 38538 37422 37112 36638 42152 41232 41024 35989 41568 36533 37767 38064 35765 38263 41243 37399 37814 37315 35699 44193 36972 41173 37352 39812 37444 30565 36182 34705 32704 36615 39406 38624 38467 40878 41592 42284 41518 38804 37752 33706 33696 42448 37248 40537 36360 41490 42852 35857 35540 40367 35144 35655 42552 43008 37257 33448 34133 37236 37728 39762 43463 41905 40642 43287 36599 33408 42337 38306 37760 34477 40993 41789 40434 42321 36121 42026 34213 37920 35568 35021 39217 39832 39450 40554 40690 42192 35974 37575 35759 34612 37096 39088 38688 39447 40556 33012 39384 43653 34124 34509 34880 36273 43685 40428 39047 39686 37588 38295 34500 32650 39273 39504 37943 40040 38563 40454 38743 33992 35140 34330 34711 40652 39735 37171 40875 39581 40876 36571 41477 35788 40540 40687 37127 42464 40352 35683 38601 34231 37176 37531 42029 37565 40917 38549 33955 33871 39012 34124 36412 39853 34684 37673 35171 32745 33901 33365 37037 35213 41152 41024 42150 38976 35904 42570 
23696 23567 23473 23305 24042 23132 23419 23028 23590 22872 23289 22912 23259 23166 23827 23441 23916 22996 23712 23366 23248 22823 23541 23411 23835 23533 23481 23149 23556 22887 23592 23312 23919 22996 23693 23127 23403 22776 23498 23283 24005 23543 23707 23304 23625 23016 23370 22963 23580 23337 24026 23303 23897 23241 23831 23299 23421 22927 23731 23257 23802 23511 23843 23505 23536 23221 23514 22909 23296 23236 23957 23579 23965 23126 23687 23164 23369 23146 23825 23616 23662 23436 23449 23106 23386 22964 23370 23259 23903 23633 24302 23403 24089 23015 22812 22535 23517 24193 24126 24123 23315 22404 22835 23456 24653 23696 23863 23159 22528 22677 23584 24128 24141 24233 23245 22557 22796 22983 24038 24137 24672 23584 23504 23267 22894 23153 23392 23877 23346 23633 23225 23100 23133 23638 23703 23737 23681 23369 23446 23516 22942 23363 23262 23924 23355 23764 23130 23371 22948 23441 23511 23260 23049 24128 22749 23127 24104 22908 22793 24359 22350 22889 24218 22567 22066 24236 22709 22410 23992 22940 22240 23916 22804 22247 23664 23049 22094 23859 22794 22281 23733 22912 22623 1598 13708 14412 15915 15349 15992 16322 16117 16400 16692 30345 26964 25571 24627 24604 24765 23730 24194 24102 23844 23554 24094 23520 23655 23770 23556 23192 24082 23104 23465 23629 23166 23113 24023 23112 23739 23449 23416 23364 23808 22872 23741 23106 23212 23327 23594 22952 23680 22938 23462 23239 23322 23182 23681 22897 23424 23342 23616 22920 23799 23030 23506 23272 23476 23053 23577 22898 23639 23110 23276 22981 23603 22949 23261 23171 23397 22923 23625 22968 23460 23016 23184 23245 23262 22653 23315 23053 23111 23117 23322 22711 23537 22773 23014 23367 23169 22822 23863 23031 23324 23879 23068 23104 24132 22541 23841 24005 22722 23469 24101 22531 23859 23309 22487 23802 23143 22528 23791 23280 22518 23778 23516 22290 23860 22855 22684 23598 22621 23008 22987 22976 23350 23148 22743 23617 23005 22869 23474 23037 22932 23580 22928 23388 23351 23158 23239 23500 22643 23537 22856 23124 23104 23121 23082 23335 22623 23479 22871 23000 23107 23235 22607 23559 22738 23065 23329 23265 22808 23800 22775 23190 23260 23381 22631 23623 22799 23115 23241 23155 22663 23719 22794 23189 23255 23259 22560 23648 22751 23080 23247 23169 22778 15291 16014 17345 17731 18095 17540 18774 17849 18706 18571 26683 25003 25226 24104 24288 24088 23908 23508 24172 23585 23620 23684 23530 23179 23948 23273 23477 23521 23495 23303 23824 23015 23581 23735 23258 22837 24343 22914 23016 24260 22630 22767 24549 22966 22956 24235 23070 22870 24487 22816 23047 24237 23127 22297 24380 22913 22471 24217 23053 22211 23952 23156 22344 23725 23275 22375 23654 23257 22908 23745 23071 23010 23527 23271 22925 23751 23271 22987 23389 23287 22952 23589 23133 23128 23468 23316 22793 23821 23012 23168 23593 23588 22889 23757 22968 23201 23473 23376 22891 23840 23055 23372 23499 23216 22998 23943 22820 23559 23386 23284 23077 23945 22875 23636 23299 23300 23143 23744 22766 23664 23086 23241 23121 23632 22488 23584 22918 23147 23104 23214 22676 23383 22580 23542 22876 23066 23170 23209 22721 23264 22979 23205 22761 23504 22621 23264 22887 23131 23021 23347 22661 23681 22810 23168 23379 23408 23090 23697 22821 23464 23218 23044 23182 23272 22784 23435 22731 23222 22988 23041 23288 23250 22698 23845 22291 23159 23916 23044 23255 23980 22532 23950 23215 22640 23569 22633 22775 23505 22555 22976 23240 10199 17798 18158 17773 20239 18929 19221 20462 19243 19269 29001 24732 24620 24851 23405 24167 24089 23063 23552 23417 23309 23590 23118 23195 23290 23177 23164 23352 22883 23486 23115 22988 23320 23171 22806 23695 22995 23280 23490 23313 22807 23729 23178 23255 23453 23298 23177 23645 22775 23629 23101 23003 23127 23287 23058 23532 22920 23353 22932 23096 23092 23391 22608 23789 22764 23380 23323 23305 22807 23784 22740 23600 23078 23111 23085 23223 23001 23275 22571 23767 22855 23383 23228 23213 23099 23475 22718 23458 22525 23618 22844 23163 23273 23740 23109 23552 22631 23741 22912 23322 22939 23085 23143 23348 22811 23906 22209 23389 23325 23332 23148 23535 22662 23509 22781 23578 22873 23169 23452 23151 23255 23584 22742 23561 23040 23191 22993 22997 23293 23192 22716 23680 22728 23632 23420 22904 23229 22941 22608 23479 22206 24045 22632 22673 24099 22817 23783 23174 22714 23108 22123 23941 22666 22715 24208 22773 23653 23297 22551 23566 22127 24128 22692 22341 24154 22967 23132 24025 22503 23853 22680 23168 23152 22323 23634 22913 23257 23328 23104 23307 23208 22869 23230 22705 23502 23071 23045 23520 23072 23201 23287 22830 19203 19777 20672 20454 20683 21072 20896 20996 21026 29367 24815 23531 24293 23197 23604 23475 23233 23333 23616 22759 23480 22854 23648 22957 23224 23429 23345 23239 23517 22750 23637 22896 23269 23017 23119 23229 23290 22846 23795 22695 23671 22805 23147 23043 23123 23236 23210 22865 23648 22736 23557 22940 23319 22868 23151 23338 23408 23096 23563 22629 23548 22766 23366 22880 23141 23279 23340 23024 23562 22723 23401 22660 23712 23256 23524 23201 23214 23026 23148 23139 23399 22586 23822 22848 23600 23024 23145 22920 23104 23394 23403 23148 23616 22636 23495 22660 23522 22865 23176 23312 23206 22963 23693 22660 23581 22784 23360 22804 23008 23337 23195 23089 23667 22700 23565 23067 23076 23160 22761 23503 23085 22552 24296 22517 23815 23687 22496 23432 22278 23581 22849 22369 24360 22695 23683 23361 22519 23635 22920 22973 23302 22044 24163 22826 22956 24191 22686 23661 23228 22721 23893 22596 23082 23033 22359 24163 23143 23032 24267 22472 24055 22965 23204 23259 22721 23682 22887 23424 23277 22949 23278 23475 22790 23340 22849 23476 22950 23082 23370 22869 23184 23052 23201 23086 22882 23621 22937 23440 23100 23111 23013 19310 21733 21747 21695 22387 21577 22400 21811 22045 21799 24110 23816 23505 22823 23822 22976 23521 23253 23072 23025 23116 23258 23145 22769 23771 22792 23373 23188 22996 23267 23319 22729 23416 22655 23751 22972 23473 23089 23031 23091 23240 22971 23491 22566 23625 22743 23256 23296 23288 23068 23232 23121 23237 22747 23873 23018 23556 23111 23087 23027 23081 23213 23329 22823 23799 22616 23715 22802 23268 22872 23066 23250 23234 22754 23712 22764 23588 22778 23276 22939 23084 23344 23265 23008 23782 22823 23444 23090 23137 23008 23207 23057 23287 22720 23769 22728 23666 22912 23264 22947 23137 23159 23249 22784 23784 22909 23477 23162 23016 23189 23136 23095 23221 22682 23672 22887 23458 23175 22999 23148 23127 23177 23276 22799 23699 22759 23570 22784 23432 22903 23037 23148 23205 22781 23751 22797 23598 23071 23243 23069 23019 23417 23221 22935 23869 22327 23692 23194 22781 23217 22439 23831 22385 22903 24064 22308 23841 22087 23786 22771 22489 24116 22722 22855 24177 22466 23936 22789 22981 22903 22515 24249 22820 23763 22952 22864 23318 22086 24351 23233 22603 24248 22720 23655 23463 22377 23795 22417 23402 22818 22416 24291 22231 22684 24237 22326 23862 22712 23426 22799 22221 24020 22903 23479 23181 23082 22961 22973 23464 23175 23194 23374 22779 23392 22650 23607 22935 23163 23434 22872 23315 23308 22889 23150 22729 23594 22672 23397 23115 22942 22979 22994 23438 23206 23276 23162 23072 23248 22697 23729 23129 23439 23126 23031 23094 22946 23346 23590 23172 23481 22695 23653 22746 23516 22865 23228 23256 22979 23086 23072 23239 23257 22937 23686 22919 23613 22816 23346 22806 23142 23255 23151 23268 23274 23008 23260 22655 23770 22951 23416 23261 23096 23016 23188 22999 23241 22711 23782 22762 23653 22944 23206 22960 23128 23112 22983 22906 23692 22611 23374 22630 23794 22813 23559 22756 23668 22795 23393 23088 23178 22925 23116 23352 23088 23017 23222 23126 23338 22996 23379 22921 23361 22817 23712 22604 23511 22607 23730 22723 23554 22951 23329 22810 23264 23271 23049 23083 23018 23176 23300 22986 23530 22725 23290 22888 23721 22576 23583 22552 23748 22688 23728 22791 23621 22800 23272 23235 23059 23093 23117 23325 23448 23116 23339 23024 23201 22832 23724 22581 23539 22603 23748 22766 23552 22825 23568 22864 23479 23040 23140 22991 23127 23378 23000 23114 22961 23416 23257 23256 23200 23029 23260 22999 23511 22695 23361 22556 23639 22536 23518 22565 23984 22717 23715 22544 23834 22609 23481 23272 22764 8323 11666 14574 13775 15197 14301 16154 15225 16209 15409 30573 26912 25536 26391 24334 25527 23600 25172 23992 24345 24093 23707 23607 23181 24811 23053 24107 12277 16444 16465 17749 17064 18009 17550 17579 18889 17472 28295 25524 26904 24673 25570 23825 25067 23977 24018 24660 23367 24248 23574 24349 23540 24004 23401 17261 17834 19132 18900 19668 18617 19881 19441 19979 31415 26631 25196 25005 24439 24474 24422 23983 23833 23886 24172 23625 23981 23576 24044 23478 23755 23772 19314 20284 20398 21187 20387 21222 20491 21543 20897 27410 24977 24716 23991 24209 23968 23880 23529 23841 23736 23773 23398 23559 23835 23542 23477 23416 19899 21521 21783 21970 22351 22249 22216 22171 22377 22635 24730 24160 23667 23895 23380 24133 23068 23901 23054 24235 23057 23911 22954 24246 23121 23989 22970 24224 23415 23694 23540 23484 23278 23441 23698 23544 23447 23596 23462 23795 23384 23943 23034 23812 22909 24176 23264 23837 23262 23717 23130 23562 23588 23542 23503 23603 23535 24183 23392 23521 23188 23333 22991 23852 22816 23569 22753 23936 22816 23776 23284 23218 23065 23154 23424 23483 23240 23399 23299 23664 23240 23797 22874 23566 22906 23991 23014 23611 23411 23304 23088 23275 23488 23255 23306 23187 23556 23528 23320 23509 23223 23287 23331 23607 23092 23469 23026 23768 22755 23680 22875 23896 23129 23716 23008 23753 23096 23628 23385 23189 23264 22784 23927 23156 23301 23975 22554 23496 22304 24492 22791 24093 22724 23706 22861 23269 24033 22639 23726 22480 24093 23366 23303 23859 22573 23355 22269 24487 22721 24032 22648 23762 22845 22615 24358 22763 23765 22700 23800 22989 23024 24081 22488 23692 22217 24519 22784 23987 23143 23430 23433 22912 23863 23077 23660 23093 23453 23080 23243 23538 23132 23417 23200 23399 23144 23137 23716 23025 23605 23120 23446 23164 23077 23555 23183 23390 23284 23311 23307 22996 23734 23024 23634 23274 23164 23083 23165 23490 23413 23296 23566 22821 23559 22717 23847 23161 23573 23367 23192 23140 23118 23413 23287 22971 23745 22824 23681 22818 23829 22887 23509 23264 23281 23249 23415 23053 23412 22792 23897 22803 23803 22850 23661 22908 23405 23333 23327 23310 23236 23242 23372 23253 23519 22952 23465 22799 23837 22951 23784 23109 23441 22967 23148 23389 23468 23256 23492 23005 23384 22755 23847 22940 23664 23100 23177 23097 23172 23351 23431 22806 24020 22903 23792 22965 23395 22907 23364 23326 23412 23071 23868 22720 23619 22713 23744 22990 23500 23274 23190 23133 23174 23440 23409 23053 23852 22838 23528 22819 23716 22983 23552 23237 23159 23071 23124 23507 23305 23262 23405 22873 23451 22765 23913 22737 23692 22872 23692 22948 23137 23915 22528 23575 22912 23354 23051 22955 24284 22462 23966 22415 23808 22747 23385 23856 22636 23765 22669 23749 23021 23286 23989 22411 23783 22234 24203 23288 23468 24181 22779 23844 22800 23360 22988 23004 24036 22435 23717 22192 24405 23258 23317 23482 23041 23263 23047 23730 22842 23444 22896 23799 23028 23558 23210 23320 23015 23181 23601 23366 23381 23287 23135 23221 22943 23687 22865 23596 22693 23789 23478 12126 12951 13914 14297 14767 15413 15253 15525 15623 35366 28777 27129 26464 25239 25327 13048 16787 16576 17796 17331 18305 17738 18348 18178 18152 28573 26539 25680 25421 24514 14845 17911 19627 19373 19819 19480 19854 19979 20111 19759 28257 25431 25622 24391 25060 24078 20023 20736 20836 21038 21169 21142 21412 20952 21910 26944 25641 24374 24459 23849 24026 21689 22201 22063 22712 21746 22738 22208 22407 21969 22185 24481 24157 23668 24320 23206 24174 23248 23945 23389 23554 23654 23159 23346 24118 23059 24021 23192 23907 23256 23564 23736 23649 23400 23944 23160 23925 23065 24056 23187 23493 23703 23511 23531 23645 23237 23709 22976 24025 23281 23633 23776 23298 23636 23667 22805 23911 22820 23677 23143 22820 24351 23256 23758 24496 22959 24237 23585 22931 23916 22777 23687 23251 22648 24563 22931 24192 23575 22820 23895 22688 22919 23587 22369 24337 23041 23087 24468 23028 23906 23491 22865 23664 22684 23616 23315 22951 23872 23496 23453 23517 23204 23571 23530 23124 23431 23015 23726 23250 23260 23593 23656 23404 23779 22979 23733 23296 23322 23302 23168 23534 23401 23236 23773 23217 
22528 22261 23223 21982 22953 21977 22957 21930 22741 21952 22273 21720 22023 21307 22373 22565 23188 23424 22660 22997 21955 20892 21273 21808 23039 22824 23978 21921 22811 21463 21257 21806 23128 23730 22559 22845 22101 21228 21526 21425 22452 23063 24071 22457 23409 21744 21840 21571 21236 21496 22478 22945 22400 23257 22320 22808 22232 22087 21951 22193 22064 22516 22671 22752 22829 22513 22489 22389 21855 22181 22191 22925 22484 22999 22101 22325 22080 22074 22020 22841 22730 22673 22457 22529 21810 22297 21587 22258 21888 23136 22296 23168 22105 22968 22201 22323 21650 22874 22412 22995 22166 22605 21560 22464 22189 23141 22037 22795 21828 22257 21596 22833 22390 22905 22229 23136 21504 22417 21977 22939 22323 23212 21874 22590 21909 22194 21617 22980 22405 22720 21949 22740 21397 22476 21901 23268 22281 23104 21912 22664 21863 22252 21702 22758 22435 22688 22373 22371 21634 22151 21514 22176 22075 23088 21785 22413 21884 22045 21254 22456 22269 23010 23323 23005 23319 21975 21717 21643 20664 22136 22771 23761 21607 22045 21306 21193 21600 22994 23554 22029 21216 21300 21296 22686 22908 23296 9538 9473 10937 11231 12333 12229 13400 32142 31619 29127 28119 26672 26828 25293 25418 24869 24904 23854 24704 23671 23755 23625 23826 22748 24055 23155 23035 23131 23459 22136 23557 22480 22727 22944 22304 22379 23435 21889 23004 22479 21563 23163 22589 21649 24464 22188 21894 24086 22918 21793 24324 22453 21723 23543 22372 21299 23856 22106 21600 23552 22296 22165 23079 22377 22295 23367 22405 22574 23086 22582 22133 23181 22364 22177 22845 22457 22223 23220 22145 22557 22553 22320 21807 23004 22184 22355 22504 22496 22107 23041 21824 22826 22259 22209 22342 22685 21726 22736 21756 22500 22097 22386 22106 22868 21677 22678 22032 22332 22196 22714 21602 23133 21945 22359 22530 22722 21410 23149 21882 22379 22468 22632 21645 23193 21840 22487 22599 22554 22053 23007 21504 23031 22288 22426 22130 22945 21539 22920 21852 22476 22091 22244 22117 22473 21760 22947 21911 22266 22563 22439 22016 23063 21811 22570 22555 22427 22027 23300 21840 22831 23063 21581 22466 23246 21007 23193 22993 21479 22883 23414 21242 22657 23431 21660 22264 23713 21129 22920 22999 21433 22923 23563 21319 22696 23371 21568 22774 23339 21280 7747 10259 11051 13212 13408 14109 15088 15491 15369 32646 30383 28720 27570 26522 25459 25591 24348 24301 24162 24189 23169 24130 23188 23161 23274 23367 22421 23441 22464 22980 22547 22961 22167 23207 22554 22579 22593 23052 21996 23221 22349 22605 22363 23034 21728 23128 22195 22555 22521 22767 21991 23301 22668 22733 22547 23400 21853 23269 22536 22857 22351 23490 22059 23113 22834 22678 22434 23194 21903 23084 22464 22616 22293 23302 21752 23081 22704 22605 22161 23271 21948 23011 22656 22469 22301 23187 21901 23002 22343 22248 22491 22799 21768 23000 22402 22235 22347 22883 21657 23059 22632 22145 22563 22748 21235 23157 22183 21618 22885 22492 21296 23313 21744 21760 22624 21788 21937 22810 21149 22561 22078 21399 21635 22225 20664 22513 22035 20887 23040 21845 20896 23680 21352 21671 23737 21928 22549 22608 22343 21690 23045 22248 22131 22723 21760 21982 22843 22277 22265 22665 22186 22367 22792 21756 22744 21985 22308 21953 22120 22071 22385 21578 23021 21954 22217 22535 23024 21869 23127 21764 22744 22323 22167 22339 22666 21638 22855 21640 22487 21961 22252 22183 22544 21589 23130 21181 22395 22459 22480 21567 23111 8650 11845 13259 14425 15327 16532 15984 17508 16569 17735 30467 28293 26221 26405 24448 24877 23790 23781 23670 23582 22772 24118 22488 23108 23121 23658 22200 23691 22193 23143 22845 22796 22264 23393 22064 23092 22470 22410 22458 23049 21702 22947 22208 22411 22360 22485 22198 22754 21709 22976 22071 22247 22583 22520 21976 23165 22077 22320 23215 22165 21964 23795 21478 22984 22681 21444 22913 22479 21233 23187 21608 22458 22006 21093 23257 22545 21453 23989 21465 22965 22841 21527 22711 21218 22485 22147 20881 23931 21757 22252 23318 21315 22816 22241 22112 22247 22045 22480 22391 21932 23000 22148 22656 22584 21957 22433 22466 21850 22540 21917 22440 22086 21974 22692 22244 22128 22836 21480 22673 22033 22472 22007 22272 22197 22414 21632 23077 21956 22803 22215 22042 22227 22368 22223 22599 21509 22964 21826 22373 22460 22336 22176 22752 21568 22800 21583 22893 21722 22487 22373 22291 22205 22872 21476 22752 21605 22946 21853 22208 22445 22635 22061 22825 21538 22925 21801 22511 21962 22143 22347 23121 21828 23029 21578 22775 21940 22368 22172 22272 22164 22577 21447 23142 21608 22960 21935 22209 22103 22448 21863 22561 21703 15482 16499 17506 18178 18371 18756 19048 19228 19622 27719 27485 24960 25200 23991 23712 23163 23049 22716 23108 22069 23515 22195 23015 22979 22495 22720 22579 22141 22681 21490 22845 22008 21781 23703 22161 22458 23451 21111 23047 21225 22904 21941 21165 23431 22023 22309 23265 21037 22886 21188 22579 21780 21597 23600 21536 22821 22405 21925 22521 20919 23104 21681 21534 23704 21532 22961 21995 21832 22112 22111 22848 22312 22336 22717 22021 22721 21735 23007 22295 22457 22625 21906 22415 22184 22286 22290 21940 22955 21976 22696 22058 22363 22248 21965 22542 22288 22135 22756 21689 22656 22019 22202 22194 22028 22479 22368 21797 23056 21621 22887 21952 22313 22135 22283 22177 22289 21802 23105 21826 22680 22097 22189 22209 22276 22129 22621 21476 23108 21833 22795 22121 22199 22115 22337 22035 22583 21508 22965 21831 22407 22288 22434 22112 22712 21612 22621 21528 22775 21713 22549 22216 22700 21760 23075 21558 22896 21821 22321 22007 22244 22322 22627 21672 22953 21673 22808 21979 22387 21873 22064 22260 22699 21457 23205 21597 22767 22172 22367 21834 22211 22377 22419 21864 22903 21497 22784 21748 22688 21741 22350 22405 17968 18912 20084 19584 20592 19699 21292 20424 20936 21209 24855 23879 23889 22540 23572 22422 23060 22322 22365 22752 22503 22199 22987 21490 22942 22145 22251 22289 21797 22653 22313 21173 23756 21416 23033 22361 21725 22333 21142 23054 22405 21619 23984 21643 22667 23194 21436 22868 21592 22759 21910 21554 23688 21151 23101 22370 22025 22167 21078 23192 21936 22102 23397 21091 22942 20910 23108 21692 21368 23616 21499 22339 23377 21136 22930 21351 22679 21772 21090 23129 22055 22720 22288 22021 22372 22455 21908 22472 21619 22901 21912 22467 22518 21923 22383 22076 22360 22230 21901 22790 22083 22423 22515 21824 22363 22277 22006 22536 21643 22912 21826 22466 22597 22103 22179 22470 21975 22425 21517 22896 21966 22345 22313 22076 22096 21952 22371 22237 21957 22995 21765 22693 22223 22011 22217 22301 22325 22446 21679 22983 21837 22785 22070 22281 22056 22076 22166 22311 21598 23143 21760 22864 21968 22433 21928 22128 22343 22469 22035 22950 21375 22874 21653 22355 21892 22152 22311 22443 21748 22958 21528 22764 21573 22829 21911 22377 22288 22315 22098 22823 21333 22835 21527 22808 21670 22230 22408 22658 21893 23171 21249 22935 21981 22169 21956 22089 22296 22378 21993 23104 21546 22796 21589 22850 21760 22155 22450 22363 22080 22592 21947 22449 21336 23131 21735 22810 21984 22425 21948 22166 22324 22667 21496 23032 21637 22895 21876 22592 21671 22112 22384 22153 22171 22259 22046 22381 21716 22872 21584 22747 21815 22544 21771 22202 22502 22387 22275 22519 21816 22453 21489 22999 22170 22695 22237 22183 22188 22050 22370 22423 22202 22743 21527 22777 21831 22810 21781 22356 22560 21909 22213 21866 22368 22157 21760 23589 21239 22970 21945 21405 22459 21363 23046 21919 21765 23589 21021 23065 21330 22460 21701 21136 23344 21880 22400 22745 21004 22528 20714 23907 21366 23161 21172 23106 21483 22422 22761 21600 21968 21040 23648 21392 22688 21144 22912 21970 22272 22816 21531 21989 21258 23568 21075 22406 20708 23378 21604 22866 22003 22084 21786 21272 23497 21538 22429 21654 22855 21707 22497 22221 22188 21979 22244 22522 22089 22043 22052 22631 22128 22345 22107 22439 22201 22395 22615 21816 22336 21671 22759 21992 22423 22071 22366 21913 22292 22395 22072 22347 21996 22521 22215 22237 22109 22371 22177 22144 22585 21991 22232 21736 22919 21465 22661 21591 22967 21736 22759 21610 22604 21755 22472 22188 22234 21856 22232 22396 22336 22132 22076 22405 22250 22160 22245 22331 22357 22144 22455 21912 22453 21664 3288 5021 8733 8931 11750 11435 13131 12162 14168 12736 35123 31616 29755 28071 27112 26492 26222 25179 25244 24229 24529 23523 24534 23087 24001 22800 24208 6985 10937 11759 14370 13888 15985 15560 16584 16174 34929 32743 30273 28469 27476 26738 25984 25264 25480 23943 24700 23424 24705 23172 24006 22749 24256 22967 12147 12881 16106 15081 17572 17141 18555 17749 19041 31891 30420 27627 27256 25756 25532 24489 24716 24252 23976 23712 23584 23709 23833 23323 23648 23024 14131 15229 17707 17426 19040 18368 20340 19104 20535 19635 29440 26752 26182 25156 24576 23837 24113 23968 23536 23245 23330 23453 23056 22880 22864 23388 23085 18453 19244 20467 20424 20783 20681 21277 21395 21436 21594 25379 24480 23278 25059 22290 23588 21730 24770 21811 23792 21592 24320 22162 23721 21941 24052 22260 23522 23156 22022 22570 21653 24040 21847 23308 21908 23133 21720 22432 23264 21905 22867 21203 24135 21892 23291 22272 22488 22016 21801 23767 21555 23101 21869 22733 22133 22743 22904 22304 21924 22188 22355 21985 21994 21965 22594 22198 22308 22442 22169 22557 21800 22863 22051 22643 21885 22889 22292 22674 22323 22518 22117 22317 22843 22241 22582 22462 22180 22560 21842 23120 21865 22732 21743 23168 22045 22789 22046 22773 21961 22568 22213 22493 21983 22410 22580 22206 22208 22210 22682 22378 22305 22365 22348 22508 22060 22895 21751 22505 21795 23005 21827 22825 22000 22656 21828 22413 22496 22296 22205 22341 22375 22065 22037 23061 21791 22807 21468 23147 21815 22989 22017 22481 21889 22240 22381 22368 22184 22323 22417 22349 22162 22977 21361 22843 21504 23181 21975 22893 22130 22566 21811 22310 22405 22373 22214 22449 22171 22604 21767 23118 21836 22816 21689 22745 21747 22793 22176 22304 21991 22323 22336 22799 21927 22948 21625 22859 21504 22979 21720 22436 22405 22259 22267 22167 22247 22532 21955 23013 21544 22808 21671 22984 21952 22204 22467 22215 22237 22477 21955 22444 21582 23077 21741 22829 21940 22275 21938 22194 22606 22427 22185 22749 21239 22466 21292 23498 21785 22724 22793 21395 22256 21556 22536 21979 21216 23860 20992 23107 20902 23253 21954 22107 23203 21350 22816 21507 23004 22033 22183 22713 21783 22000 21194 23882 21122 23065 21806 22193 21927 21304 23464 21491 22888 21789 22110 22064 21383 23638 21246 22752 21989 22355 22345 21665 23005 22117 22614 22654 21912 22308 22125 22224 22323 21760 22864 22150 22519 22256 22182 22137 21979 22582 22155 22279 22675 21859 22432 21690 22976 21829 22864 22133 22146 22117 21898 22727 22452 22096 22552 21965 22442 21613 22980 21652 22761 21760 22720 21749 22424 22438 22016 22180 22186 22304 22453 22147 22966 21520 22588 21516 23202 22224 22503 22149 22483 21840 22198 22325 22515 21888 22726 21691 22528 21526 22951 21701 22756 22043 22341 21841 22235 22313 22487 22123 22843 21669 22848 21519 23031 21834 22678 22059 22347 21861 22293 22328 22330 22120 22650 21893 22461 21909 22869 21450 22745 21552 23062 21608 22870 21676 22695 21640 22538 22093 22347 22089 22568 21879 22545 21655 23092 21486 22756 21392 23015 21797 22831 22007 5337 6853 9335 10766 11517 12228 12702 13759 14049 36216 33592 31081 29641 27474 27856 8908 12732 13223 15726 15574 16679 17074 17068 17200 34958 33705 30181 28491 28630 25570 14005 14094 17512 17194 17461 20099 18310 19313 20416 18576 31824 27813 28949 25934 26112 17826 16732 19046 18247 20498 20148 20388 21221 19575 21732 28120 27728 25731 24615 26288 23933 21033 21527 20441 21670 20939 21948 21852 21462 22514 25991 25783 24604 24135 23850 23525 23888 23494 23050 23847 22860 23429 23192 22854 22992 22654 23330 23464 22713 23563 22160 23287 22637 22762 22613 22643 22941 22823 22628 23303 22155 23204 22056 23072 22265 22626 22921 22912 22434 23002 21892 22986 21821 23056 22225 22491 22727 22720 22263 23317 21839 23101 21956 22967 22256 22549 22279 22682 21718 23201 22043 22887 22437 22421 22280 22571 22444 22796 21740 23287 21996 22592 22496 22766 22311 23068 21704 23108 21702 22838 21904 22451 22603 23199 21995 23120 21858 22939 22077 22487 21946 22472 22241 22761 21708 23225 21827 22980 22304 22363 22277 22870 21632 22810 21718 22868 21945 22349 22639 22363 22295 22789 21701 22888 21822 
