# Supplementary material for: An Active Feature Selection Strategy for DWT in Artificial Taste
Source: Hindawi journal article supplement (doi:10.1155/2018/9709505), 2018-01-01
Supplement: f1 [file 9709505.f1.zip › oolongTea-med-3.txt]

43458 43464 43648 42960 52 8225 16723 17999 22005 20198 21860 20499 23345 21106 22749 22336 22364 22118 22390 22648 22228 22521 22364 22859 22144 22433 22293 23031 22021 22762 21947 23096 21892 22826 22000 23296 21804 22817 21987 23424 21965 22967 21780 23309 22035 23046 21977 23344 21914 23079 22007 23205 22118 23044 22290 22979 22092 22802 22492 22643 22227 22716 22571 22748 22322 22951 22095 22881 21790 23414 21732 23205 21743 23398 22129 23182 22241 22743 22192 22694 22788 22534 22528 22672 22592 22957 22222 22992 22333 22940 21924 23305 21962 23144 21860 23336 22144 23208 21920 23137 22132 22992 22511 22544 22281 22628 22772 22740 22620 22701 22466 22817 22172 23267 21859 22822 21774 23832 21516 23402 21383 23877 21877 22313 23495 21783 22570 21574 23564 22128 23072 21936 23104 22813 22541 23456 21608 23086 21341 23923 21967 23217 21906 23128 22584 22455 23189 22004 22969 22026 23370 22216 22984 22166 23034 22525 22817 22650 22447 22385 22484 22757 22552 22631 22692 22213 22586 22138 23287 21978 23094 21952 23530 22034 23083 22313 22965 22258 22760 22656 22560 22376 22749 22443 11192 15933 18456 18322 19462 18933 20119 19290 20226 19429 30423 25154 25129 23226 24183 22756 23508 22768 22924 22576 23040 22983 22998 22389 23362 22284 23104 22112 23616 22093 23370 22264 23276 22198 23097 22572 22757 22373 22677 22821 22886 22560 23139 22123 22976 22032 23483 22288 23193 22256 23244 22265 23065 22535 22915 22377 22499 23328 22071 22720 21815 23744 21927 23095 21692 23608 22057 23225 22063 23159 22262 23008 22705 22480 22360 22505 23602 21723 22784 21473 23809 22016 23287 21908 23130 22658 22598 23092 22246 22784 22219 23284 21981 22951 22237 23076 22336 22887 22549 22818 22242 22519 22890 22822 22605 22708 22570 22896 22225 23313 22122 23221 22249 22836 22527 22659 22702 22901 22144 23488 21953 23157 21994 23333 22092 22839 22599 22831 22357 23257 21953 23191 21993 23082 22144 22623 22644 22976 22310 23385 21776 23161 22138 22676 22394 22632 22636 22805 21991 23495 21937 23432 22230 22874 22135 22704 22439 22820 22133 23368 22334 23092 22624 22606 22385 22490 22684 22811 22179 23318 21968 23177 22273 22801 22217 22505 22892 22637 22461 23372 21573 23167 21863 23159 22265 21526 23516 22298 22083 23788 21656 23314 16654 19449 19726 19805 22179 20659 21543 21233 20782 32026 24409 25148 23127 23218 23932 22345 23168 22295 23476 22313 23117 23042 22775 22933 22835 22544 22752 22279 23260 22280 23049 22528 22925 22395 22704 22856 22976 22360 23544 22213 23187 22447 22819 22481 22742 22988 22793 22510 23228 22128 23152 22208 23255 22156 22797 22679 23122 22365 23494 21824 23190 21979 23301 22210 22681 22646 22900 22465 23261 22193 23072 21785 23576 22137 23171 22589 22670 22462 22925 22272 22907 21819 23501 22033 23344 22405 22757 22343 22805 22359 22804 22132 23444 22120 23194 22307 22577 22559 22609 22599 22729 22124 23462 22312 23065 22580 22716 22448 22741 22029 22796 21918 23808 22208 22772 23372 21847 23017 22162 22706 22328 21351 23862 22151 22750 23353 21722 22990 21774 23008 22287 21797 23928 21661 23240 22478 22717 22439 21718 22831 22392 22697 22720 22555 22571 22528 22784 22645 22354 23152 22449 22944 22791 22523 22550 22468 22700 22845 22315 23442 22235 23094 22452 22648 22470 22687 22449 22840 22058 23448 21982 23196 22312 22857 22140 22632 22605 23132 22407 23159 21868 23031 21815 23497 22050 23224 22096 22978 22045 22811 22536 15554 19392 20833 21239 21785 21090 22340 20910 22267 21227 26950 23683 23793 23002 23072 22421 22862 22680 22962 22543 23301 22104 23095 21973 23410 22210 23064 22528 22704 22374 22576 22865 22728 22596 23133 21936 22975 21928 23352 22356 23004 22636 22136 22629 21879 22876 22487 21383 24044 21862 23269 22608 22328 22156 21806 23719 22160 23189 22177 22349 22276 21520 23968 22135 22659 23191 21914 22564 21399 23351 22058 23110 22222 22946 22272 22510 22912 22567 22821 22761 22483 22739 22267 23205 21989 22918 22021 23338 22664 22890 22510 22821 22288 22670 22737 22675 22457 22760 22581 22806 22259 23328 21866 23168 21957 22988 22089 22805 22531 22821 22346 22764 22444 22843 22029 23488 21925 23133 22472 22760 22244 22720 22491 22938 22258 23255 21815 23168 21966 23385 22035 22986 22381 22747 22379 22984 22161 22976 21889 23389 21992 23128 22392 22705 22221 22610 22704 22656 22321 23284 21980 22912 21988 23395 22187 23153 22353 22852 22224 22400 23255 22037 22928 22935 21977 22642 21254 24048 21645 23376 21752 22962 22039 22340 23543 21832 23042 22870 21838 22302 21200 23913 21992 23140 22604 22264 22684 22156 23248 22144 23004 22296 20538 21175 21600 22280 21781 22060 22093 22273 22222 26586 24452 22396 23336 22252 23162 22325 23117 22615 22947 22250 22908 22725 22650 22457 22569 22505 22845 22309 23288 22053 22951 21909 23577 21910 23211 21946 23434 22134 23041 22362 22932 22135 22765 22673 22912 22285 22805 22533 23146 22397 23072 22128 22920 22198 23555 22008 23205 21942 23224 21961 22892 22619 22533 22229 22572 22821 22639 22352 23095 22299 22833 22087 23219 21924 23040 21915 23322 21596 23022 22673 22381 22483 22435 22711 23084 22565 22757 22211 22292 22090 23495 21715 22674 21337 24003 21369 23148 21357 23927 21856 23210 22433 22598 22073 21888 23710 21728 22952 21991 22824 22299 22716 22697 22504 22471 22477 22880 22559 22768 22553 22788 22564 22467 22959 22101 22957 21997 23177 22187 23105 22483 22725 22275 22647 22657 22609 22531 22632 22528 22832 22247 23356 21972 23197 21956 23288 22074 22996 22403 22744 22211 22689 22673 22798 22460 23036 22120 22920 21796 23408 21702 23123 22377 22752 22016 22624 22676 22799 22360 22842 22318 22858 21975 23313 21712 23308 22248 22984 22002 22688 22699 22638 22529 22740 22464 22756 22092 23245 21864 23108 21993 21173 21623 22102 22514 22342 22221 22483 22035 22528 21701 24451 22008 23458 22324 22537 22250 21608 23685 22284 22877 23332 21704 23051 21284 23760 21890 22723 23112 21946 22929 22265 22773 22204 21808 23975 21682 23337 22855 22337 22875 22074 23236 22686 22819 22805 22480 22729 22777 22430 22756 22190 23287 22219 23085 22400 22675 22129 22539 22969 22056 22375 23238 21811 23098 21967 23221 22153 22846 22671 22593 22378 23134 22156 22865 21800 23428 21956 23313 22092 23040 22023 22826 22620 22687 22472 23031 21975 22998 21825 23521 22093 23296 22224 22816 22145 22612 22720 22916 22460 23032 21892 23001 21760 23415 22092 23152 22190 22888 22101 22808 22729 22664 22496 22931 22145 22814 21858 23260 21903 23008 22391 22530 22368 22599 22657 23120 22224 23368 21681 23051 22005 22796 22135 22190 23698 22070 23041 22099 22599 22246 21899 23808 21575 23326 21793 23328 22146 21691 23761 21693 23042 21928 23115 22600 22274 23538 21714 22437 22328 22768 22798 22578 22906 22313 22714 22017 23137 22468 22912 22376 22793 22336 22560 22695 22581 22502 22823 22469 22657 22224 23292 21812 22953 21897 23361 22041 23123 22241 22889 22152 22626 22605 23138 22233 23187 21912 23080 21749 23510 21918 23149 22382 22742 22128 22621 22685 22610 22446 22934 22013 22944 21840 23546 21836 23109 21733 23409 21952 23154 22472 22665 22156 22679 22506 22869 22329 22861 22336 22848 21931 23386 22031 23069 22003 23040 22189 22939 22504 22438 22530 22613 22649 22709 22277 23154 21865 22994 21944 23204 22380 22552 23159 22110 22906 21944 23029 22540 22160 23744 21472 23198 21448 23268 21941 22307 23511 21584 22944 22919 21749 22761 21335 23461 22176 22682 23735 21738 23121 22341 22568 22254 22406 22869 22716 22587 22937 22328 22695 22124 23174 22432 22928 22517 22745 22326 22512 22754 22812 22481 23104 21891 22979 21954 23211 22116 22850 22672 22448 22412 22704 22487 22745 21953 23330 22029 23136 22402 22656 22177 22761 22554 22970 21958 23369 21806 23176 21897 23404 21728 22977 22538 22621 22308 22864 22301 22887 22144 23403 21799 23228 21952 22942 22280 22583 22528 22584 21944 23513 21697 23245 22095 22980 22051 22646 22583 22795 22405 23252 21898 23106 22033 23028 22211 22773 22707 22504 22537 22745 22357 22808 21915 23248 22288 22392 23392 21848 23015 22721 21808 22951 21194 23655 22041 21802 23689 22042 22839 22998 21515 23125 21530 22963 22016 21728 23827 22245 22813 23238 21533 23228 22835 22152 22838 22004 23029 22309 22471 22832 22934 22346 15000 16790 18442 19989 19609 19980 20054 19994 20604 38891 28200 24404 23738 23624 23410 22797 23814 22195 23502 22813 22801 22680 23159 22309 23213 22066 23288 17044 19951 20630 21325 20493 22103 20951 21841 21593 32282 25013 24902 22997 23544 23123 23132 22559 23799 22010 23236 22764 22749 22104 23689 22186 22600 10388 19849 20204 21973 21166 21724 21619 22266 21093 22458 27312 24504 22535 23734 22912 22952 22517 23532 22390 23061 22784 23067 22388 23499 22173 22629 22696 16979 20377 21909 21654 22177 21154 22652 22231 21737 22045 26546 23034 22469 23879 22934 21918 22179 23138 23362 21657 23124 23737 22289 21911 23956 22112 21639 20984 21828 20951 21696 22836 22744 21345 22781 23495 21978 23344 23216 22830 21997 23031 22400 22672 22261 22944 22632 22437 22786 23243 22384 22674 22927 22683 22039 22966 22440 22884 21940 23161 22687 22769 22360 23503 22050 22884 22729 23052 21845 23120 22253 22656 22096 23116 22053 22732 22387 23183 21835 23253 22351 22789 22375 23217 21843 23192 22616 22714 22247 23520 22265 23009 22679 23416 21936 23340 22089 22628 22547 22775 22007 23370 22125 22644 22796 22137 22105 23318 22088 22855 22663 23353 21920 23571 21472 22997 22664 22778 22326 23285 22025 23223 22704 22613 22482 23148 22008 23096 22544 22512 22577 22976 21941 22973 22019 22900 22220 22492 22757 23195 21888 23815 22020 22935 23124 21840 22979 22749 21597 23087 21753 21772 22989 22424 21625 23111 21888 22150 22724 22150 21977 22864 21688 22027 22954 22071 21814 22886 22391 21671 23232 22732 22401 22641 23249 22093 23016 22684 22446 22649 23080 22344 22680 22940 22521 22362 23169 22246 22872 22796 22856 22340 23424 22368 22792 22907 22750 22360 23395 22000 23161 22356 22487 22445 22759 21975 23048 21915 23048 22072 22455 22631 23195 22072 23509 21730 23237 22203 22683 22161 22544 22383 22970 21801 23272 22087 22708 22593 22841 22154 23469 22016 22976 22608 22810 22376 23299 21818 23059 22625 22595 22480 23343 22077 22953 22618 23306 21844 23378 21953 22720 22009 23261 22148 22537 22424 23277 21946 22871 22708 22636 21899 23040 22318 22710 21836 23113 22816 22740 21837 22865 22451 23052 21973 22745 22850 22759 22101 22096 22656 23514 22421 22528 21511 22445 23448 22543 22328 21993 21674 23228 22738 23817 22112 21790 21392 22339 22956 23175 23530 22255 22228 21941 21352 22068 22412 23243 23189 23345 22906 22937 22839 22532 22675 22276 22662 22055 22483 22066 22309 22018 22268 22064 22414 22332 22603 22112 22516 22085 22829 22172 22584 22432 22804 22236 22877 22288 23047 22472 23026 22449 23080 22364 23028 22205 23028 22250 22973 22261 22823 21904 22724 21703 22588 21742 22680 21749 22861 21806 22816 21984 23034 22116 22871 22387 22864 22429 23113 22538 23168 22587 23256 22172 22985 22088 22806 21751 22507 21953 22855 21976 23468 22250 23456 22349 23212 22246 22811 21906 22423 21838 22853 22183 22714 22611 23017 22572 22717 21911 22517 21984 23085 22370 23213 22281 22468 21980 22769 22884 23014 22384 22536 21573 22817 22361 23940 22487 22060 21300 22222 23194 23148 22828 21853 21562 5650 16594 19589 19130 18588 18755 19593 21116 20840 19991 30629 25444 25589 24089 23129 21875 16485 20333 20642 21526 20806 21256 20992 21623 21677 34214 25670 24041 23340 23808 22978 16582 19937 21386 21899 22284 21325 21841 21495 22659 21951 25817 23305 23506 23103 23559 15520 21060 21294 22784 22004 22313 21378 22788 22108 22906 25173 23605 22567 23830 22621 22991 20794 22481 22240 22959 22115 22430 21932 23092 22082 25600 22464 23328 22727 23456 22348 22884 22026 23424 22468 23255 22063 22800 22768 23175 22277 22836 22040 23264 22340 23490 22055 22914 22246 23160 22392 22708 22167 23036 22464 23336 22375 22620 22220 22815 22800 23023 21913 22669 22206 23349 22442 22454 22029 22789 23047 23015 21560 22104 22167 23938 22722 21964 21321 22440 23617 22419 21478 22325 22277 23857 22329 21746 21668 22318 23760 23081 21411 21973 22080 24000 22948 21866 21307 21867 23783 23128 22488 22048 22425 22618 23104 22528 22452 22783 23078 22736 22915 22158 22644 22616 22867 22868 22834 22034 22568 22114 23354 22577 22574 22180 22689 22832 23186 22173 22546 21932 23222 22263 23232 22273 22562 21956 22884 
22155 21049 21701 22283 20981 23179 20624 22519 20704 22881 21596 21559 22932 20672 21760 21203 21976 22346 20898 23136 20901 21611 22069 21595 22350 21050 23077 21348 21006 22103 21669 21563 21939 21624 22263 21281 22410 21991 21171 22247 21290 22548 21553 22244 21456 22391 21359 22412 21583 22297 21524 21977 22350 21495 21504 21256 22885 21137 21980 20896 22398 21760 21719 22203 21324 21863 20759 23252 20836 22507 20781 23000 21399 22350 22085 21512 21432 20946 23196 21398 22221 21544 22277 21643 22226 21817 22025 21624 21828 22173 21551 22048 21788 22199 22040 22007 22022 22054 22081 21720 22310 21571 22119 21346 22755 21337 22436 21620 22352 21571 22230 21937 22004 21616 22007 22074 21896 21806 22016 21817 22325 21718 22391 21190 22309 21195 22705 21381 22440 21428 22559 21809 22373 21799 22215 21643 22120 22041 22137 21786 22209 21813 21532 21732 22556 21313 22459 21248 22869 21448 22624 21319 22586 21849 22494 21710 22103 21585 22096 22085 21997 21825 21930 22064 22097 21454 22712 21293 22329 21306 22650 21513 22456 21752 22257 21596 22085 22288 21512 22022 21485 21984 21084 21904 708 3780 7015 7954 10757 9401 11128 10521 13301 11383 33485 28080 27115 24516 23968 24301 22471 22900 21928 23700 21924 22765 23008 21508 22139 22003 22491 22073 22148 22210 22156 22167 21932 22473 21527 22228 21606 22704 21604 22365 21921 22074 21735 21931 22273 22031 21947 22235 21973 22121 21697 22598 21575 22189 21632 22920 21403 22425 21398 22720 21413 22604 21442 22722 21359 22605 21525 22606 21939 22473 21821 22484 21616 22176 21850 22163 21623 22016 22042 22053 21802 22230 21808 22733 21831 22509 21537 22224 21353 22816 21160 22629 21383 22704 21320 22495 21774 22152 21634 22065 22167 22039 21893 22221 21953 22112 21712 22587 21259 22395 21475 22486 21644 21984 21987 22075 21854 22516 21064 22459 21204 22883 20972 22036 22675 21168 22296 22321 21091 22205 20766 22819 21491 21669 23120 21416 22363 22289 21166 22071 20886 22916 21556 21010 22920 21652 22145 22248 21878 22062 22091 21865 22002 21600 22499 21858 22043 22249 21655 22106 22104 21660 22129 21536 22573 21659 22256 22176 21867 21875 22101 22013 22131 21459 22683 21415 22471 21775 22059 21529 21943 22016 21866 21713 22782 21299 22540 21786 22016 21768 22051 62 8856 11270 14011 13583 15552 14797 16167 15283 16395 34522 29249 26180 25275 23316 23591 22384 23514 22173 22913 22171 22356 21981 22505 21913 22353 21563 22839 21404 22647 21622 22469 21570 21172 21601 21205 21085 21741 20667 21619 20949 21579 21083 21242 21636 21473 21304 21658 20791 21523 20727 22249 21136 21105 22224 20773 21890 21511 20926 21500 20279 22273 20903 21265 22574 20816 21845 21376 20953 21277 20305 22755 20810 21883 21627 20864 21583 20335 21623 21096 21520 21732 21353 21475 21612 21220 21487 20929 21965 20805 21451 21689 21160 21447 21595 21270 21523 20747 21946 20428 21512 21639 21261 21409 21579 21178 21664 20843 21999 21229 21341 21633 21458 21281 21750 20864 21799 20791 22071 21001 21734 21361 21415 21367 21762 20945 21573 20809 22019 20926 21751 21479 21402 21173 21454 21314 21565 21024 22181 21005 21771 21549 21309 21346 21517 21565 21894 21220 22116 20712 21749 21218 21541 21239 21249 21651 21655 21449 21925 20906 21816 21209 21607 21321 21337 21652 20885 21157 22036 20909 21816 21152 21491 21227 21086 22503 21131 21728 21920 21075 21748 20588 23310 21367 22728 21673 21974 21591 21686 23051 21152 22263 17047 19968 19026 19904 19892 19131 20359 19028 21029 19815 23389 23411 21965 23296 22272 23087 21965 22422 22162 22000 21800 21892 22187 21863 22067 22259 21623 22097 21402 22672 21573 22324 21714 22302 21611 21817 22123 21897 21825 22217 21659 21994 21294 22537 21520 22217 21944 21879 21733 22153 21705 22034 21425 22634 21185 22288 21551 22400 21463 22071 21932 21747 21648 22155 21373 22123 21266 22819 21368 22470 21549 22455 21521 21962 21867 22256 21709 22032 21662 22125 21402 22443 21240 22085 21225 22458 21594 22164 21829 21719 21607 21747 22017 21687 21858 21795 21825 21883 21597 22265 20969 22217 21260 22128 21421 21298 22800 21064 22296 21029 22538 21980 21377 22923 20896 22472 21205 21444 21871 20912 22913 21595 21851 22305 21128 22055 20803 22619 21543 21669 22328 21294 21987 21333 22070 21669 21760 22027 21481 21954 21922 21911 21914 21299 22528 21464 22057 21845 21649 21620 21771 22093 21952 21713 22081 21609 21999 21449 22535 21204 22217 21276 22278 21377 21849 21836 21873 21763 21940 21728 21991 21538 22447 21292 22114 21465 22208 21457 21793 21979 21793 21731 21966 21612 21994 21413 22477 21291 22190 21417 22276 16817 19309 19828 20072 20136 20436 20535 20664 20329 21203 22663 22880 21704 22589 21125 21969 21738 21639 21357 21511 21917 21476 21592 21553 21924 21768 21497 22324 20741 21651 20650 22837 20753 22331 20919 22362 20786 21873 22032 21040 21319 20943 22776 21075 21977 20989 22163 21095 21792 21992 21100 21412 20508 21921 21332 21648 21735 21581 21706 21288 22112 21167 21779 21185 22347 21472 22121 21520 21811 21515 21776 21901 21413 21753 21660 22047 21866 21639 22245 21402 22144 21568 22731 21525 22388 21772 22083 21466 22047 21916 21669 21441 21735 21940 21669 21582 22230 21879 21728 21768 21809 21528 21944 21219 22406 20880 22199 21184 22407 21340 22093 21957 21620 21876 21866 21982 21665 21555 21799 21620 22432 21677 22470 21256 21979 21370 22317 21360 22081 21780 22016 21493 21716 22072 21616 21895 21868 21938 21169 21625 22289 20916 22144 21292 22214 21346 21846 22353 21161 21707 20843 22818 21255 22218 21719 21394 21657 20720 23185 21370 22139 22328 21211 21689 20726 23008 21252 22318 21594 22039 21633 21875 21984 21645 21840 21824 21944 21724 21515 22309 21261 22017 21349 21995 21405 21817 21939 21664 21775 21679 21968 21799 20045 21363 20274 21463 20608 21413 20777 21197 21259 23180 22273 22139 22029 22156 21261 22656 21285 22327 21383 22086 21361 21705 21907 21716 21697 22082 21248 21943 21174 22400 21274 21954 21722 21761 21613 21705 21674 21816 21287 22396 21167 22204 21667 21724 21408 21685 21660 21977 21223 22490 21142 22093 21528 22157 21447 21688 22146 21720 21768 22132 21287 21989 21243 22397 21549 21983 21915 21483 21767 21574 21880 21805 21024 23145 20791 22413 21274 22059 21376 21189 22901 21016 22169 21393 21195 21617 20593 23016 21409 22346 21870 21398 21593 20839 23040 21276 22339 21703 21910 21409 21607 22063 21989 21785 21928 21514 21751 21327 22208 21309 22108 21476 22208 21518 21593 22019 21909 21674 22174 21478 21979 21280 22424 21424 22019 21782 21657 21540 21696 21750 21889 21399 22199 21106 22266 21276 22272 21233 21965 21799 21597 21504 21767 21822 21637 21481 22343 20934 22113 21127 22368 21815 22053 21533 21813 21334 21688 21980 21707 21737 21962 21466 21891 21123 22611 21116 22153 21379 22058 21376 21699 21975 21539 21660 21680 21678 21916 21505 22132 21064 21793 21131 22323 21327 22000 21589 21913 21394 21605 22152 21255 21965 22409 20828 21828 20483 23045 21120 22275 21703 21243 21518 20855 22835 20957 22203 21231 22181 21482 20633 22912 20817 22253 20860 22770 21177 21975 22247 21408 21863 21198 22487 21339 22080 21443 21985 21513 21669 22185 21512 21692 21643 21930 22198 21577 22311 21294 21956 21280 22324 21489 21974 21680 21693 21508 21728 21795 22093 21633 22141 21127 22082 21192 22402 21061 22240 21671 21848 21498 21812 21937 21863 21648 22322 21236 22156 21171 22019 21459 21863 21957 21915 21602 22201 21274 22209 21235 22127 21456 21789 21852 21736 21601 22208 21265 21896 21208 22442 21070 22173 21379 21766 21476 21642 21859 21557 21524 21824 21187 21705 21136 22233 21190 22008 21744 21440 21624 21480 21588 21105 21322 22475 21114 21959 22053 21089 21669 20603 22681 21335 21616 22741 20503 22023 20494 22582 21159 22002 22329 20646 21865 20699 22254 21320 21193 22871 20718 22136 20880 21866 21721 21169 22365 21293 21962 21642 21395 21634 21381 21769 21646 21312 22160 21129 21953 21735 21441 21537 21585 21826 21475 21322 22268 21043 21968 21100 22072 21295 21745 21860 21605 21527 22080 21093 22065 21079 22199 21316 21703 21769 21773 21571 22193 21030 22275 21333 21924 21370 21720 21865 21976 21488 22392 20929 22184 21357 21924 21472 21634 21761 22075 21188 22359 21513 22057 21824 21888 21639 22207 21137 8492 15019 18391 11319 13260 14022 13856 14195 15707 37997 31568 27656 25747 24449 24317 22698 23286 22256 21475 21170 21198 21419 21393 20841 22339 21031 12927 12072 13511 15718 17403 15845 17911 17886 16906 18282 34473 27517 26758 24803 23085 23592 22873 21629 23256 22665 21539 22760 23011 21196 22759 23065 21779 9142 14736 16688 17414 18980 18584 19168 19558 19076 19276 29945 26052 24477 23506 23372 22446 22509 22240 22676 21711 22647 22293 21950 22143 22816 21623 21909 18913 19772 19553 20818 20021 20418 20469 20959 20071 20660 22717 22672 21180 22113 21625 21753 20859 22042 21179 21499 21110 21802 21281 21365 21388 22117 21112 20709 20872 21010 20346 21557 20708 20967 20628 21405 22784 21774 21916 22575 21623 22173 22125 22048 21198 22380 21351 21848 21287 22183 21610 21521 21659 22202 21228 21598 21968 21683 21170 21845 21541 21889 21207 22055 21678 21495 21614 22325 21257 21747 22022 22183 21213 22550 21412 20831 21920 21531 20421 22027 21697 20933 21222 21672 20819 20985 22059 21241 20704 22296 21984 20917 22381 22528 21283 22976 23254 21867 22229 23435 21223 22460 23049 21421 22337 22089 21975 21980 22283 21592 22484 22116 21771 22051 22245 21464 22280 21805 21736 21833 21895 21715 22319 21541 22109 21760 21909 21736 22146 21393 22354 21523 21922 21987 22049 21429 22604 21455 22218 21784 21715 21736 22194 21366 22155 21259 22393 21504 21972 21934 22164 21260 22394 21528 21731 22052 21957 21342 22497 21586 21941 22023 21783 21326 22659 21463 21906 21895 21989 21238 22182 21663 21655 21605 22043 21297 22066 21573 21835 21700 22375 21433 21764 21731 22161 21153 22259 21687 21835 21842 22121 21299 22130 21764 21600 21767 22129 21251 22122 21347 22132 21533 21656 21976 21952 21255 22329 21629 21587 22664 21401 22045 22368 20753 22413 21062 22121 21556 20787 22872 21454 21167 23233 21302 22145 22742 20984 22205 22253 20867 22497 21905 20962 22371 21883 21109 22162 21130 21408 22342 21504 21681 21715 22139 21297 22239 22027 21824 21817 22459 21671 21714 22197 21922 21424 21924 21843 22042 21333 22155 21962 21952 21517 22301 21594 21744 21548 22148 22033 21924 21233 22369 21568 22055 21267 22260 22056 21994 21255 21798 21601 22569 21356 21879 21110 22272 21879 22026 21453 21728 21456 22539 21763 22516 21487 21805 21166 22070 21797 22279 21769 22021 21493 21688 21124 21843 21485 22190 21955 22266 21747 22553 21415 22615 21380 22217 21402 22132 21496 21944 21317 21835 21465 21649 21256 21664 21335 21638 21190 21642 21195 21635 21265 21613 21208 21792 21213 21804 21362 21789 21137 21842 20944 21577 21041 21497 20757 21073 20791 20885 21177 21255 21153 21348 21289 21525 21696 22244 21288 22595 21440 22839 21632 22951 21893 23186 22133 22338 22044 21799 21316 21130 20788 20910 20645 21043 21763 21486 22155 21504 22500 21960 22469 21835 21888 21543 21488 21329 21696 21337 22214 21777 21960 22024 22156 21789 21773 21312 21744 21816 22282 21718 22237 21387 21728 21377 21981 21964 22211 21760 21800 21227 22023 21589 22471 21575 21797 21197 22375 21815 22401 21630 21953 21213 21885 10444 12167 14304 15707 16085 17302 17408 17993 17310 17641 27069 25212 23463 23255 21808 22444 16807 18512 18757 19235 18800 19809 19164 20493 19582 26567 23729 23433 22873 22853 21616 18379 18935 20456 20025 20107 19851 20464 20721 20855 25442 23641 22537 22970 22173 22116 18866 20186 20742 20916 20097 20498 20286 21673 21027 20352 22061 22044 23222 22486 20998 18985 19823 22089 21664 21003 20173 20839 21931 21546 21342 21465 21433 22915 22179 21645 20608 21248 22254 22052 21842 20775 21304 21617 21859 21460 21556 21216 22048 21427 21968 21139 21376 21536 21615 21815 21293 21138 21904 21387 22001 21115 21312 21031 21591 21718 21805 20917 21526 21236 22324 21488 21498 21287 21915 21852 22080 21169 21800 21453 22482 21834 22040 21286 22104 21897 22201 21079 21905 21340 22407 21504 21601 21323 21927 21777 22137 21035 21479 21056 22163 21232 21449 20824 21316 21615 22058 21376 21467 21420 22473 21703 22123 21033 22343 21902 22291 21701 21838 21393 22200 21620 22217 21491 21520 21496 21870 22110 22360 21468 21722 21470 22436 21738 21730 21155 21662 21830 22061 21972 21873 20832 21638 21383 22841 
21917 21184 21771 21281 22017 21601 21733 21767 21778 21660 21604 21768 22087 21412 22337 21171 21895 21457 21831 21729 21812 21912 21643 21384 21979 21428 22179 21349 22249 21663 21556 22033 21615 21447 22141 21248 22244 21120 22130 21639 21950 21857 21887 21393 22231 21189 21830 21374 21806 21776 21614 21592 22141 21224 22240 21671 21813 21918 21863 21482 22285 21095 21824 21315 21712 21841 21280 21920 22467 20740 22464 22189 21189 22730 22007 21476 22194 21216 22167 21242 22301 21405 22156 21371 22103 21320 21904 21594 21838 21592 21559 21937 21938 21809 21831 21812 21789 21771 21943 21496 21764 21305 22253 21268 22051 21238 22087 21432 21956 21670 21773 21529 21610 22100 21296 21729 21111 22537 21612 22103 21412 21857 21588 20568 23034 21109 22482 20921 22531 21474 22311 21652 21610 21433 21355 22849 21431 22331 21099 22324 21410 21814 22009 21256 21642 21489 22138 21582 21907 21463 22033 21536 21888 21807 21841 21613 21577 22072 21348 21918 21324 22281 21568 22088 21867 21489 21635 21444 22041 21708 21901 21760 21708 21765 21489 22153 21336 22020 21265 22357 21344 22112 21545 21849 14533 17280 17941 18551 18612 19077 19362 19303 19287 33952 25507 23400 22552 22536 21733 22126 21385 22400 21235 22155 21207 22320 21349 21736 21888 21587 21712 21679 21765 21729 21588 22220 21235 21921 21184 22284 21317 22100 21283 21987 21388 21792 21848 21655 21755 21568 21832 21784 21715 22105 21552 21768 21405 22243 21127 22057 21053 22640 21336 22298 20960 22741 21324 22577 21108 22425 21634 22196 21697 21646 21194 21657 22401 21209 21495 21103 22802 21154 22292 20815 22099 21354 21824 21881 21232 21527 21671 22019 21576 21775 21430 22152 21520 21869 21754 21763 21620 21648 22075 21441 21892 21454 22103 21344 21973 21725 21622 21572 21476 22029 21760 21671 22112 21435 22089 21440 22005 21559 21553 21959 21925 21776 21964 21378 21897 21197 22182 21383 21824 21939 21783 21778 22056 21320 22152 21232 22369 21334 21831 21869 21829 21737 22195 21235 22128 21487 21816 21634 21571 21868 21760 21537 22314 21293 22185 21384 21911 21536 21627 21910 21777 21401 22292 21458 22144 21428 21911 21430 21590 22012 21745 21670 22138 21239 22018 21223 22168 21402 21737 22337 21639 21935 21917 21289 22501 20876 22004 21411 20886 22864 21548 12352 19007 18769 20405 19074 21155 20480 20583 21176 19887 27201 23199 22702 21877 21041 23104 21341 21992 21667 21684 21701 21450 22211 21896 21848 21905 21484 21776 21511 22104 21737 21624 22237 21376 22080 21533 21824 21645 21527 22033 21148 21621 22103 21313 22200 21387 22097 21392 21771 21913 21601 21828 22019 21372 22010 21226 22166 21404 21880 21891 21837 21776 21994 21470 22081 21209 22220 21405 21930 21846 21772 21671 21671 21648 21808 21376 22387 21543 22171 21676 21632 21559 21622 21796 21863 21372 22343 21290 22249 21527 21856 21516 21641 21944 21795 21592 22153 21385 22167 21559 21771 21576 21611 21868 21724 21424 22328 21414 22247 21856 21531 21761 21344 21819 21673 20919 22976 21233 22382 21852 21377 21729 21088 21884 21602 21016 23042 21248 22529 21512 21389 21741 20816 22775 21648 21692 22263 20946 22420 21350 21761 21742 21380 22202 21475 22024 21696 21591 21664 21457 22154 21680 21613 22145 21494 22001 21504 21848 21581 21533 21948 21681 21680 22242 21633 22035 21544 21624 21649 21581 22016 21792 21603 22215 21184 22053 21297 22085 21488 21895 21795 21747 21672 21605 21863 21808 21637 22080 21169 21927 21143 22321 17248 20321 19953 21195 20480 20893 21206 21048 21157 30476 23852 22883 21644 22560 21329 22279 21262 22195 21336 21848 21891 21646 21815 21751 21847 21824 21443 22324 21258 22128 21319 22230 21453 22090 21967 21703 21744 21705 21581 21888 21447 22580 21037 22400 21472 21575 21908 20855 22467 21768 21559 22700 20953 22192 20515 22656 21682 22199 22113 21244 21955 20754 22551 21517 20997 22839 20870 22368 21224 22077 21276 21814 22033 21466 21858 21434 21962 21657 21869 21928 21385 21660 21484 22064 21760 21831 21735 21697 21770 21504 22170 21443 21977 21235 22364 21488 22147 21703 21760 21551 21469 21879 21676 21646 22064 21286 22023 21115 22394 21532 22093 21591 21845 21499 21570 21975 21799 21479 22326 21236 22194 21324 21960 21360 21815 21857 21891 21682 21969 21530 21884 21190 22429 21185 22140 21620 21728 21649 21626 21714 21846 21703 22304 21245 22080 21285 21953 21495 21680 21982 21731 21770 21607 21766 21815 21526 22158 21090 22016 21051 22693 21445 22144 22382 21077 22132 20903 22509 21587 21908 22140 21088 21894 20554 22967 20921 21863 22548 21155 22160 20960 22160 21371 21464 22549 20944 21760 21504 22010 21559 21748 16946 20020 21072 20919 21769 21376 21648 21495 21388 21422 24139 22828 22148 21920 21945 21576 21803 21431 22208 21280 22006 21243 22290 21403 22091 21454 21728 21460 21721 21937 21677 21703 21588 21877 21926 21745 21880 21551 21764 21417 22204 21260 22116 21224 22309 21492 22252 21392 22178 21395 21875 21771 21685 21610 21550 21880 21582 21475 22130 21216 22002 21160 22391 21376 22152 21228 22196 21468 21856 21784 21651 21522 21600 21946 21809 21824 21843 21541 21767 21415 22373 21378 22199 21488 21699 21382 21607 22186 21239 21609 20930 22704 21209 22131 20715 22690 21384 22272 21088 22071 21457 21568 22439 20940 22092 20617 22971 21184 22586 22055 21465 21676 21487 22129 21367 22071 21331 22114 22106 21975 21755 21682 21541 21499 22074 21425 21821 21626 21736 21656 21606 22139 21333 21960 21259 22240 21335 22165 21637 21767 21488 21652 21932 21660 21753 21974 21405 21824 21364 22317 21237 22170 21184 22199 21490 21879 21771 21611 21616 21735 21715 21851 21264 22355 21273 22153 21225 22227 21841 22156 21689 21572 21611 21608 21870 22016 21542 22272 21128 22004 21165 22337 21631 22231 21653 21708 21540 21611 21934 21861 21805 21993 20178 21550 21018 22173 21262 21998 21657 21511 21509 24180 22791 21838 21952 22440 20951 22318 20736 22437 21187 21497 22625 21321 22299 21313 21850 21440 20944 22953 20957 22381 21885 21365 21661 20776 22752 21603 21733 22064 21476 21894 21654 21777 21717 21465 22177 21586 21943 21971 21484 21744 21505 22018 21733 21731 22120 21317 22029 21319 21920 21475 21728 21996 21833 21856 21761 21571 21874 21237 22297 21687 22122 21915 21553 21577 21671 21952 21218 21559 22240 21287 21957 21187 22388 21429 21824 21793 21760 21688 21815 21643 21899 21541 22253 21267 22134 21244 22183 21382 21993 21719 21767 21815 21760 21712 21879 21369 22255 21177 22099 21211 22348 21555 22079 21691 21587 21713 21633 21639 21784 21388 22232 21290 22169 21431 22097 21448 21632 22121 21696 21753 22070 21000 21800 20648 22684 21266 22285 21906 21353 21620 20876 22809 21454 22026 21946 21291 22240 20567 22944 21205 22379 21751 21669 21385 20927 22858 20911 21944 21459 21927 21536 21792 21954 21424 21907 21601 21945 21516 21790 22048 21394 21896 21264 22288 21517 21909 21883 21474 21632 21529 22033 21712 21807 21789 21708 21802 21595 22231 21305 21949 21191 22225 21445 21745 21941 21626 21715 21704 21743 21809 21354 22335 21124 22032 21221 22298 21539 22121 21719 21644 21543 21716 21823 21888 21744 21706 21628 21920 21391 22272 21164 22263 21138 22347 21158 22036 21729 21729 21569 21608 21947 21984 21753 21987 21352 21814 21383 22321 21336 22143 21473 21895 21415 21637 21940 21745 21830 21829 21403 21768 21081 22748 21309 22416 21547 21728 21398 20992 22808 21305 22280 21596 21282 21700 20736 23031 20960 21584 22718 21088 22331 21513 21592 21600 20775 23072 21357 21846 22141 21354 21965 21361 22212 21477 21689 22069 21449 21819 21441 22028 21614 21584 22205 21272 21912 21294 21921 21441 21637 22071 21645 21865 21784 21557 21843 21322 22224 21436 22146 21598 21735 21565 21655 21634 21832 21367 22284 21335 22209 21344 21882 21504 21576 21984 21751 21867 21802 21638 21930 21170 22412 21412 22231 21576 21863 21490 21659 22000 21984 21724 22061 21196 22213 21190 22135 21379 21733 21880 21852 21670 22173 21170 22087 21256 21988 21520 21639 21948 21876 21741 21967 21372 21933 21219 22406 21506 22102 21736 21678 21616 21703 21586 21800 20915 22880 21410 21986 22435 21183 22396 21291 21932 21610 20549 22631 21130 21453 22697 21302 22355 21952 21096 22021 20582 22676 21191 21396 22794 21269 21956 21981 21425 21928 21703 21440 21880 21345 21857 21584 21410 17114 19067 18688 20279 19626 20306 20065 19918 20262 29631 24512 23203 22007 22440 21742 21626 21998 21870 21704 22359 21617 22120 21799 21589 21777 22016 9429 18644 19399 20727 20260 20576 20806 21063 20374 21299 26541 23440 22729 22187 21385 22492 21508 21640 21873 21904 21136 22338 21420 21500 21703 21973 21368 15899 19733 20752 20357 21489 20839 21144 21248 21483 20728 25205 22927 22507 21732 22423 21467 21639 21923 21809 21187 22187 21465 21616 21868 21966 21303 21756 18648 20853 20635 21681 21575 21437 21284 22352 20816 29654 24249 22353 20892 21556 22407 22410 20933 22185 22772 21304 20779 22746 21239 20887 21921 22064 20992 19954 21768 21680 20935 21953 22502 21301 20715 22814 24154 21933 22041 21651 21612 21386 21986 21800 21527 21952 22073 21863 21516 22074 21625 21328 22035 21619 21608 21287 22016 21874 21632 21627 22209 21514 21489 21856 21789 21261 21960 21677 21879 21263 22066 21696 21768 21833 22072 21378 22067 21805 21856 21639 22346 21536 21943 21877 21559 21303 22364 21480 21653 21798 21832 21133 22234 21318 21588 21557 21928 21306 21874 21431 21660 21504 21920 21164 22181 21357 21559 21834 21881 21115 22241 21287 21657 21599 21870 21171 22279 21408 21682 21998 21984 21379 22308 21399 21773 21946 21592 21596 22324 21427 22007 21874 21734 21767 21992 21248 22030 21328 21856 21504 21239 22188 21544 20921 23011 21296 21930 22528 21232 22224 22462 21264 22209 22235 21112 22160 22238 20921 22465 22151 21061 22357 22144 20947 22589 22234 21095 22078 22731 21190 21827 22200 21552 21714 22016 22106 21554 22221 21771 21801 22119 21514 21352 22204 21589 21381 22005 21672 21368 22252 21455 21609 21974 21703 21347 22199 21392 21688 21975 21142 21491 22215 21491 22101 21832 21685 21776 21960 21190 22051 21319 22088 21403 21608 21943 21984 21658 22281 21193 22199 21488 21668 21678 21649 21506 21869 21140 22235 21434 21649 21903 21799 21223 22363 21325 21748 21910 21797 21378 22263 21882 21811 21869 21842 21137 22303 21399 21711 21352 22118 21517 21680 21692 22310 21493 21810 21900 21803 21169 22050 21508 21687 21243 22077 21824 21788 21455 22104 21636 21904 21228 22049 21875 21815 21063 21763 21793 22436 21549 21006 21063 22464 22576 21914 20524 21531 22332 23024 21172 20953 20907 22336 22191 22417 22356 21541 20602 21119 21646 22718 22301 22888 21234 21142 21208 20746 20937 21456 21421 21753 21984 21904 22192 21733 22127 21569 21923 21540 21871 21465 21638 21326 21649 21716 21561 21358 21623 21600 21587 21437 21507 21631 21531 21314 21488 21413 21493 21305 21532 21236 21564 21271 21649 21486 21537 21303 21539 21459 21575 21332 21836 21368 21922 21389 22012 21332 22109 21461 22076 21469 22280 21504 22299 21703 22348 21728 22423 21522 21815 21299 21667 21126 21777 21174 21745 21427 21781 21652 21817 21871 22212 21629 22155 21325 21657 21193 21539 21464 21863 21384 22204 21518 22322 21713 22060 21500 21760 21368 21872 21766 22008 21821 21859 21261 21651 21416 22343 21799 22054 21320 21544 21306 21638 22484 22165 20935 20811 21223 22650 22080 22594 21133 21211 21103 21504 13701 18408 18320 18784 19424 21258 20688 20488 19376 20123 27357 24542 22787 21376 21606 9847 18244 20041 20360 20229 20701 20697 21356 20982 20807 27432 23206 22976 22391 21600 21573 17722 20552 20916 20981 20693 21451 21487 21654 21111 28599 23824 23031 22133 22123 21467 18087 20705 21568 21102 21165 20948 21802 21408 21715 21030 23709 22344 22443 21524 21687 19047 21421 21342 21840 21174 21578 21421 21843 21712 21752 22869 22536 21732 22309 21338 21979 21651 22051 21851 21842 21418 21923 21633 22084 21294 21826 21495 22055 21772 21927 21293 21928 21520 22319 21552 21697 21536 21886 22011 21943 21283 21741 21409 22348 21676 21641 21239 21771 21896 22063 21292 21576 21395 22229 21789 21549 21037 21590 22377 22438 21150 20824 21203 22805 21941 21045 20754 21608 22778 22374 20813 20974 21138 22961 22253 21838 20609 21418 22865 22576 21035 20789 21645 22464 22248 21678 21204 21682 22032 21755 21989 21402 21579 21863 21895 22003 21575 21575 21818 21643 22166 21768 21496 21442 21655 21977 22000 21446 21421 21549 22167 21868 21804 21338 22008 21712 21926 22037 21874 21255 21613 21431 22180 21712 
37577 39568 36116 40457 38618 34048 35517 35832 35800 34656 33903 35602 39392 42104 42123 39866 37512 42418 36952 35472 36262 37380 34569 41504 38569 42245 40616 41658 41444 35136 33391 38497 34534 42370 40396 40224 41217 38980 39936 34637 37958 36912 37521 41732 41297 40012 36741 41837 36639 35751 34280 33746 40000 40289 41088 35101 36352 37650 37127 42840 41737 39104 36456 40983 35348 36590 40403 37586 43344 35002 43032 40883 39992 36071 38656 40118 39945 36352 37592 36396 36834 40771 36928 34541 32483 41415 35857 33353 37938 35047 38981 40108 41351 43034 38997 37456 43408 38528 40834 37270 34738 40866 43250 34553 39351 42032 42776 38075 41924 35508 33344 42939 33973 39332 40724 35673 39040 33643 34028 39524 42073 37056 33835 32711 39110 39092 43530 37255 33440 42352 42016 34764 34048 42157 41830 37292 42368 42305 39243 41840 42140 36618 38705 40304 34614 42661 40274 34087 37303 42700 38912 33152 36810 36530 36612 34337 33604 38984 41426 37873 41193 41527 33649 39149 37250 42816 34644 42129 39083 35408 37393 35560 35223 35717 42710 40338 41356 38691 40424 42409 41444 39686 33512 36678 30820 38101 35933 32112 32432 37489 40625 40420 40272 33273 44423 43360 33968 33285 35426 39914 41816 42628 40624 40371 40272 41737 41696 35760 36955 33872 35028 35008 35704 35411 33716 40704 40516 37685 39557 41494 41271 39665 40788 38552 41835 36144 36720 34707 35909 33356 36360 35912 35315 39541 33370 35584 41957 41364 39360 39173 38535 34784 41082 41718 37409 36049 41104 34180 38772 42937 34459 40352 35241 34485 39747 34753 42378 40283 43296 39381 36601 39276 41495 36123 39468 41621 36512 37273 40128 33363 34737 38451 33703 35974 42178 40193 32995 37017 35898 35685 34183 34184 39240 42327 37386 42640 39936 41371 38419 35712 34287 33459 42439 39036 35618 34848 39405 42522 39680 42266 38858 33751 33186 37975 37672 35776 38069 41527 37548 40026 40549 41961 36519 37832 36163 35815 38888 41072 40173 40272 42420 41536 36880 37223 36599 35665 40529 40512 39882 43253 36631 34243 33509 36928 35584 33056 41528 41108 40672 41784 37776 33093 34304 37322 35874 41833 41594 42681 40010 42298 37795 42304 34160 38615 35766 34746 39911 40640 38609 40392 40301 42089 35893 41845 34741 37870 37720 40769 43969 36689 38483 42112 36666 37155 33394 27194 36820 34339 41792 37809 39408 31639 32966 39410 36775 42522 41447 35846 37168 38060 39791 41616 38587 34864 34805 35111 42309 40980 37344 36752 37302 42867 36020 32922 39307 35789 34217 41056 41581 39325 33423 36160 34567 33058 38446 39540 34456 39576 41031 40758 41984 39653 41736 36160 37496 34007 36332 38529 41794 38935 40328 40377 42135 37353 37248 36784 35734 38432 42854 39504 40172 40999 42282 37912 36864 35854 34896 34789 34244 36060 41302 42807 33695 40226 35074 34020 33505 34164 35961 37058 41728 42379 41013 41411 33432 36576 32949 34235 37686 36197 33812 39912 41869 40549 33831 35797 33592 34125 36961 35511 41880 42048 42296 41525 36953 33238 35488 41125 36742 34868 36872 38381 40306 42760 37180 41484 35713 38496 37344 34010 37600 39099 40131 33472 32640 41604 36070 35500 36505 34275 34967 41397 37269 42741 41754 35856 35796 41457 40872 42954 38794 35048 33931 34412 42285 40275 34937 34226 39737 43112 38764 32688 36537 33897 33132 37772 34916 34653 40903 34400 38631 33328 34112 34320 33776 38168 36009 34023 40754 39680 39138 40851 39522 42855 37594 36224 35745 34722 34013 36972 36161 34322 38994 39570 37920 39380 41858 38480 41056 37371 39985 31776 36416 39978 38295 39505 47057 38341 37664 34510 33527 40936 41568 40723 40738 41390 36921 37224 34615 36428 35922 36855 36321 42292 42023 40594 39882 41288 41165 42821 39664 38477 35383 35520 35186 33800 36844 42464 34327 38119 42412 42816 34073 37248 36352 43264 35972 33555 35392 37220 40384 32449 34496 34688 40580 39808 40600 38183 34917 33698 32897 37397 37175 36277 42128 40384 39560 40826 36576 38642 42707 37120 42310 38309 34728 37094 37610 41732 34944 42815 39194 35633 36648 35729 34980 35761 32492 40064 42496 38553 40422 42496 42993 40245 35486 35463 33554 42576 37560 34954 34476 38829 40758 38897 39227 42800 33447 39395 34156 36652 43139 33824 38210 36359 42808 42168 40516 40643 41332 38152 41462 36704 36871 37192 34883 38000 33178 37140 39780 43172 39961 40192 34408 35237 34390 34264 35130 36706 35291 41322 40804 39284 40794 38052 43157 35042 38368 35633 35801 34212 35655 36461 33042 40033 38768 38416 38464 35495 42286 39976 42792 38857 39968 36914 43927 34169 37206 40089 38660 37352 32775 38400 37049 37080 33625 39232 40083 37328 39952 41965 42752 34034 36856 35542 32490 38472 33735 35554 35095 37680 38384 37035 35858 41287 34536 42944 42039 42520 41393 37120 39879 37524 37958 33686 36227 42288 40760 40612 38809 40635 41498 42256 39776 42733 35619 42418 35689 37687 35048 35251 33697 37062 37632 35712 37106 33616 35545 41991 40960 40560 39836 40249 41840 43089 41532 41831 40469 42016 37376 36000 34960 34112 33331 36982 33973 42545 40071 40071 38640 39457 42857 41680 40181 40448 40656 42880 36984 35973 34496 32809 33644 37760 36312 36304 36728 33272 35739 42054 42674 41778 40949 42928 35427 41582 34435 40367 40642 34405 36741 35398 39970 40084 34963 35192 41500 41224 38705 39389 42565 33684 42979 37380 39504 33586 38482 39620 34336 38999 42720 35200 42976 40099 41912 39544 41349 39808 39650 38472 36080 34825 33190 42894 39520 42255 36864 34411 35431 34490 33980 40000 41398 38178 40525 41062 41586 40432 34568 35785 42637 34732 37649 34740 35776 38184 42096 36593 41485 42112 40637 40456 39719 40840 43025 37568 36009 34247 33973 35600 35296 36908 40192 42368 40808 40273 40384 41089 36757 40073 35250 33480 34140 33920 37063 38299 33348 40835 39161 38639 39724 42005 34899 40984 34816 35185 33104 34097 37728 37020 36427 38456 39589 33653 37723 40448 40696 38777 34769 32843 32648 41250 36712 36784 37741 43008 37614 41934 34792 42891 40045 43153 34931 41005 41836 41165 37011 42133 37184 38359 37520 42632 37690 41664 35072 35072 35890 34010 35456 38868 42759 37517 34635 35736 35375 42520 40529 33920 37825 38241 42928 35862 32653 38200 35686 35508 39640 41193 39004 41296 37572 42771 35617 38474 36697 36725 35651 33576 36909 40384 41689 35334 39719 37760 33392 33600 34732 37671 40193 33773 40765 40971 38245 39808 42656 42547 36555 36072 35474 34921 36433 34524 37307 33280 41208 40642 40154 40636 40679 41845 38688 35628 35843 36479 35511 35083 37232 41696 41714 39930 39680 40296 42280 33717 39360 35328 33792 35134 34145 34353 35824 41657 41142 40960 40460 42550 39658 42487 34379 39704 35082 35808 39152 37644 36208 33751 35136 40214 41601 37538 41512 34487 36219 36647 42576 38867 38026 40912 41114 33258 37832 40051 42720 36251 34760 41609 37371 37296 37005 37829 42592 38009 33092 35756 37827 42025 37660 34035 37767 32997 36012 38689 41769 37429 40258 41367 33280 37280 37388 42631 34411 32994 38456 35232 36448 36199 35251 36180 34032 40960 41124 38272 39976 40960 42616 35917 37840 34444 35281 35056 35847 36243 41421 42420 39168 38662 40256 41690 33475 39640 35665 34416 33312 35112 36661 36979 35584 35186 34352 37291 41968 41252 39740 41623 39287 42312 39720 38790 35573 35400 33488 33892 37888 38183 35943 38356 41446 36627 41736 41953 41457 40484 42818 37611 42209 34625 37656 35724 36536 36576 41984 35988 38599 36213 41097 42752 33792 35189 41776 37511 36608 40938 41396 34257 40394 35269 34448 39243 37333 33640 35724 38476 42112 33201 33655 33715 35150 39272 41751 36977 40192 41650 38460 41573 40864 42983 35363 39137 42552 36864 42224 38912 34448 33512 40663 40614 37584 40939 37673 42268 34627 39208 34713 36961 35976 33459 36612 41066 40902 42547 40112 34295 35607 33683 34560 34096 36420 41684 41609 41600 40856 41388 37443 32643 33400 38023 35991 37120 36266 34336 37613 39494 42857 42217 41338 33879 36960 42832 35024 38309 38209 35570 39136 39988 40920 39984 40204 41792 35840 37108 36908 34800 40320 39634 39610 40383 38455 32902 34285 37849 37120 35840 38295 41792 38088 40208 42787 32988 39366 35692 34948 34000 35172 33664 36006 36778 37344 41888 38464 43082 40232 42893 41168 37913 34273 32592 34628 38987 42661 35794 40848 42375 38032 38768 38693 33241 34914 39816 41840 36712 40503 38048 38500 42176 37847 35335 42008 37392 41325 37043 33667 41650 37376 37878 33255 40504 33725 40605 38466 36996 40368 48316 45269 41421 38958 43061 36123 34369 38509 37254 35145 42257 34462 39584 36448 33900 35723 38268 27398 32609 40904 35140 40184 33015 35409 38446 41561 41074 46125 43648 36212 40563 41861 43923 33125 34113 36929 37210 38966 41959 42423 43338 35616 38221 41649 35762 34672 34644 41187 43049 36402 39168 40149 43111 35085 41571 38400 43955 35815 42886 43072 34778 37527 36299 39722 40693 42853 34364 36992 38242 41080 36109 33060 36042 33742 34722 33702 42262 40824 42160 35848 48054 42760 42390 36812 33376 42546 42972 37314 40461 36532 40817 35539 36017 40477 36729 37480 38980 37462 37181 35776 34736 37048 37853 43800 41232 34992 36728 41235 38040 38893 34669 34128 41532 38489 36224 33161 37584 39296 37173 32954 39057 34522 40858 38912 34418 33942 40659 38480 37136 34144 34368 40498 33088 42583 36981 36231 40468 38117 35092 37239 40615 39224 35061 35638 36586 39141 41600 39353 36546 36710 34461 41949 33249 37784 37265 33716 40812 42527 42999 34870 36122 36512 39196 41123 41280 34002 33360 37456 40967 37212 42403 34982 32448 37221 39534 40520 41848 33877 36499 37237 39168 41106 41030 34858 34141 37037 39597 41498 42020 35104 38557 38199 41660 41781 42212 36226 37892 33936 33854 41596 42456 38976 37159 35629 35847 38327 40092 38939 41099 36908 32598 40284 40635 33429 36753 38996 40712 37840 33280 39952 40843 43638 40554 40771 41344 39130 40043 41338 37127 43207 40435 38548 42318 40011 37344 34388 40920 39073 39485 36136 39769 36640 40552 33424 35085 38233 39578 33479 40813 36098 36228 39824 33057 41176 40906 34117 41496 38835 34852 41461 41464 42944 34473 38106 35381 41312 40927 41792 35187 38272 39439 43040 41176 43161 39840 36693 35021 35650 37921 39833 39104 41292 39482 42165 34309 37857 38183 34692 41232 40039 40887 42904 34967 34956 34352 32544 37030 39111 41221 42532 34694 37463 36359 40243 42556 41552 35906 37433 36229 41431 41700 37399 36384 37185 36649 39074 41880 42240 35765 41321 39966 33237 34593 35005 41569 43202 36532 37337 36391 39458 38939 32864 34945 40462 39560 36459 36080 42632 39751 34432 37089 40292 38980 37268 36544 38480 35805 36016 42860 33797 37657 38517 43162 34227 37284 32432 32981 41760 39224 39654 37392 36858 41735 40924 42896 42432 33561 33304 39104 34668 35737 41633 37788 40298 39406 40059 34992 36999 42275 42512 36136 38135 37248 40365 35789 40000 33721 37480 33207 37152 42649 34664 41168 34667 35180 33494 41501 34694 33733 33719 42275 33089 34486 33143 40704 42880 42359 43252 41280 33410 40112 33783 40452 34611 42832 33442 40833 33462 42339 34072 41003 36864 41591 37720 41915 38960 41263 39980 42772 39562 42949 41510 32842 41434 35536 42051 35593 42851 33200 36344 40805 34937 38941 35959 39591 35819 42152 36245 34471 36373 37285 40665 34729 40056 41408 34861 39744 33399 42312 37346 41620 40930 33290 41532 35477 39001 43139 35815 41536 37152 35813 38533 36691 36930 40498 34736 41879 42380 36576 38960 41088 33453 40791 34584 43305 40479 37303 35788 40244 35212 39040 34247 39097 40279 39291 32722 32000 40439 39808 34586 41083 40537 34346 31633 40360 39328 44510 45785 36756 41349 34345 31927 38775 38176 41309 40178 34816 34407 41408 37823 35749 44848 41548 38601 42816 34144 33453 33507 32481 36541 37610 34465 42348 43378 34913 38995 47709 37824 39425 40083 40050 42917 37875 34544 33306 38804 39719 37297 36288 41745 35576 37978 36469 41956 43432 33280 34960 37412 42287 41728 36741 39616 33903 42098 37000 35144 35692 37380 33461 35360 41561 41515 38607 34666 38858 37030 36622 42080 37858 34296 39104 40992 36626 43072 39386 36000 37715 40949 37792 32872 41772 33494 34908 32931 37235 38816 38041 40712 36008 41864 42352 35158 34348 40370 36120 37166 39308 40896 33840 41658 41190 36407 33473 38072 33973 42328 43281 39720 35904 39934 36760 37832 38266 34945 33991 36373 42355 36049 37619 39136 38432 41432 36960 33272 41904 37506 33904 38027 35481 34466 42960 41392 35205 39808 34988 38448 36081 38384 41952 34100 36992 37369 38603 33855 33657 36328 34528 40092 35863 42830 42544 35004 38208 38420 42451 42560 33799 40182 37223 36306 41256 38747 35254 37588 38825 37125 40418 34516 42212 40550 35319 
22967 23941 23064 23430 23369 23513 23337 23553 23529 23317 23024 23601 23040 23821 22868 23981 22992 23531 23434 23320 23196 23429 23259 23727 23239 23868 22889 23532 23111 23426 23413 23304 23447 23757 22600 24022 22799 23477 23290 23393 23253 23335 23116 23752 22855 23823 23107 23417 23552 23249 23101 23784 22780 23435 23255 23346 23264 23298 23242 23729 22896 23839 23157 23667 23728 22932 22964 23917 22335 23399 23652 22477 23341 23145 22717 24059 22505 23561 23990 22682 23652 24163 22501 24071 23686 23016 24217 23341 22905 24560 22715 23279 24354 22584 22936 24170 22178 23340 23287 22935 23573 23063 23466 23409 23135 23552 23463 23144 23724 23195 22783 23631 23148 23092 23738 22940 23331 23632 23129 23113 23559 22953 23613 23143 23477 23383 23165 23163 23655 22807 23470 23271 23180 23081 23715 22912 23461 23418 23214 23210 23845 22793 23703 23351 23272 23279 23685 22793 23770 23047 23226 22963 23143 23280 22855 23008 22912 23414 23068 23237 23214 23061 23193 23075 23672 22784 23395 22705 23509 22944 23434 23043 23066 22848 22983 23330 23128 23098 23120 23188 23187 22807 23553 2200 13669 14012 15799 14992 16131 15273 16626 15767 16625 30582 27054 25246 25081 24604 24194 23952 23885 24000 24022 23733 23863 23140 23859 22958 24122 23243 24005 23208 23592 23047 23509 23520 23276 23322 23288 23522 23441 23392 23689 22905 23552 22876 23814 22889 23639 23075 23386 22959 23268 23465 23072 23076 23091 23552 23150 23355 23140 23309 22451 23228 23278 23228 22976 23175 23446 22913 23107 22645 24099 22493 23244 22160 24448 22443 23627 22051 24184 22672 23822 22967 22720 22914 22734 23997 22599 23287 22664 23617 22799 23484 22858 23426 22979 23067 23335 22976 23028 22932 23404 23105 23179 23310 22864 23225 22860 23491 22633 23513 22713 23373 22828 23072 23298 23168 22976 23463 22679 23438 22637 23579 22707 23207 23130 23047 23015 23294 22689 23260 22467 23700 22773 23176 23132 22983 23059 23308 22809 23372 22392 23625 22677 23265 23201 23405 22999 23587 22486 23502 22643 23383 22680 23155 23214 23269 22956 23565 22535 23489 22639 23177 22786 22882 23262 23596 23003 23409 22624 23426 22570 23504 22799 22929 23271 23084 23114 23232 22496 23227 22496 23737 22794 23005 23792 22380 23470 23404 22253 23674 22140 23581 22709 14146 17502 16788 18300 17705 17745 18034 17294 19618 17935 27011 25616 23995 24503 23052 24692 23584 23867 23598 23374 23360 23247 23387 23391 23046 23764 23150 23562 23027 23469 23122 23014 23638 23360 23261 23694 22982 23662 22974 23549 23047 23110 23451 23391 23299 23529 22965 23440 22793 23844 23032 23461 23335 23242 23268 23435 22938 23515 22689 23812 22905 23484 23378 23237 23300 23465 23017 23479 22665 23853 22942 23773 23070 23352 22928 23211 23282 23360 23007 23803 22843 23618 22871 23387 22994 23218 23355 23280 23008 23828 22697 23593 22848 23449 22944 23223 23415 23309 23011 23750 22681 23730 22904 23437 22997 23074 23383 23719 23030 23741 22848 23708 23142 22789 23275 22427 23947 23031 22736 24252 22528 24028 23376 22731 23333 22285 24053 23033 23045 24157 22440 23895 22394 23672 22883 22588 24184 22688 23492 23625 22854 23205 23054 23362 23192 23075 23584 22817 23536 22925 23390 23114 22881 23417 23687 23156 23524 22790 23534 22816 23360 23057 23054 23282 23230 23013 23645 22713 23552 22907 23490 22877 23165 23365 23191 23137 23577 22664 23362 22627 23854 22711 23527 22760 23268 22834 23088 23225 23100 23016 23061 10918 17921 18225 19107 18549 19437 18712 20021 19516 19812 27931 25176 24370 24121 23832 24188 23495 23733 22844 23621 22790 23938 22362 23618 23149 23313 22929 23084 23415 23136 23192 23301 22912 23303 22702 23810 23151 23505 23085 23205 23009 22923 23805 23179 23200 23968 22316 23977 22776 23064 22879 22469 24221 22748 23744 22870 22985 22841 22400 24285 22450 23901 22561 22885 23354 22147 24110 22788 23745 22889 23160 22858 23023 23336 23000 23203 23236 22905 23047 22863 23483 22688 23416 22805 23538 23414 23316 23127 22976 23035 22930 23348 23152 23318 23185 23064 23214 22813 23598 22720 23357 22700 23448 22664 23270 23176 23111 23031 23210 23029 23225 22865 23681 22604 23456 22711 23408 22833 22988 23300 23459 23040 23504 22536 23288 22491 23671 22209 23428 23116 23057 22937 23035 23172 23298 22615 23736 22689 23575 22881 23310 22752 23117 23332 23236 23157 23386 22632 23325 22572 23653 22647 23470 22958 23191 22849 23034 23455 22972 23190 23030 22915 23069 22285 24372 22532 23905 22679 23255 22656 22755 24032 22491 23648 22407 23645 22813 22141 24283 22644 23796 23175 22827 23008 22353 24069 22697 23386 22857 23201 22889 22972 19049 19957 20561 20480 20732 20640 20610 21190 20648 30164 24514 24467 23477 23660 23597 23168 23291 23211 23598 23288 23266 23258 23190 23281 23238 23612 22705 23411 22647 23857 22818 23648 22817 23625 22807 23362 23200 23233 22998 23129 23341 23177 23142 23385 23067 23291 22806 23628 22789 23424 22614 23747 22855 23627 22868 23387 22763 23368 23223 23243 23118 23202 23187 23282 23060 23440 22996 23389 22624 23731 22899 23602 22668 23624 22869 23297 23143 23111 23007 22996 23264 23206 23072 23627 22397 23386 22344 24280 22372 23850 22118 24264 22624 23897 22610 23651 22737 23465 23191 22807 23008 22435 24209 22686 23765 22564 23524 22889 22999 24233 22368 23217 22923 23309 23329 23239 23169 23036 23117 23007 23459 22727 23276 22684 23511 22691 23275 23140 23072 22970 22935 23360 23163 23165 23122 23033 23319 22953 23552 22596 23496 22595 23315 22855 23300 23200 22976 23007 23079 23248 23491 23070 23373 22784 23291 22581 23696 22704 23475 23015 23160 22854 23079 23274 23131 23045 23354 22855 23228 22805 23558 22743 23612 22657 23536 22749 23200 23192 23223 23127 23184 22989 23213 22821 23609 22733 23494 22626 23607 22875 23371 19417 21485 21760 21826 21856 22087 21627 22486 21499 22515 24135 23852 23131 22902 24205 22912 23715 23198 22722 23163 22065 24363 22439 23530 23523 22730 23297 22273 24192 22946 22559 24151 22392 23844 22478 23503 22787 22432 23707 22977 23484 23221 22980 23112 22869 23431 23063 22915 23638 22885 23466 23063 23203 22918 23050 23381 23137 23218 23335 22775 23329 22692 23630 23050 23430 23175 23026 23092 23037 23177 23204 22666 23761 22836 23649 22737 23454 22722 23161 23309 23104 23141 23081 23081 23306 22691 23812 22730 23497 23023 23316 22828 23042 23329 23318 23124 23423 22775 23312 22620 23785 22739 23536 23024 23257 22859 23095 23252 23191 23209 23317 23046 23246 22772 23769 22772 23543 23081 23063 22979 22996 23340 23282 23116 23552 22684 23464 22591 23588 22912 23230 23834 22567 23409 23000 22917 22957 22490 24266 22339 23904 22235 23789 22663 23009 23887 22681 23780 22774 23572 22873 22617 24056 22356 23569 22099 24230 22847 23424 23397 22834 23216 22817 23671 23024 23439 23102 23060 23024 22976 23465 23065 23232 23060 23344 23195 22853 23698 22810 23575 22679 23640 22269 23472 23084 23126 22961 23000 23449 23145 23234 23300 22773 23485 22568 23772 22949 23577 22941 23320 22925 23080 23335 23367 23172 23303 23093 23290 22900 23766 22848 23608 22791 23671 22826 23465 23108 23120 22973 22980 23395 23448 23122 23433 22922 23313 22711 23772 22738 23601 22790 23522 22884 23271 23240 23108 23077 22999 23278 23236 23004 23528 22695 23428 22600 23727 23006 23426 23310 23000 23223 22865 23244 23092 22863 24000 22336 23597 22036 23969 23229 23414 23740 22551 23488 22310 23772 23048 22081 24419 22808 23397 23624 22588 23447 22333 23713 22899 22642 23433 23014 23240 23161 23013 23269 22778 23679 22913 23409 23040 23095 23018 23053 23452 23217 23240 23419 22913 23345 22791 23741 22985 23514 23206 23088 23099 23085 23367 23302 22902 23702 22733 23685 23075 23153 22910 23142 23387 22996 23040 23660 22611 23576 22744 23665 22860 23423 23130 23129 23056 23186 23269 23307 22912 23800 22688 23568 22721 23696 22850 23261 23460 23273 23130 23731 22623 23638 22747 23672 22850 23335 23336 23280 23221 23618 22765 23488 22691 23642 22913 23420 23340 23133 23281 23190 23282 23260 22912 23768 22866 23671 23286 22924 23302 22692 23221 23041 22323 24472 22665 23760 23479 22727 23720 22828 23054 23216 22112 24376 22711 23212 23985 22572 23829 22780 22980 23204 22112 24289 23232 22436 23653 22830 23384 23309 23142 23344 23303 22814 23368 8685 13181 14176 13756 15573 16128 15726 16324 15827 16440 29424 26617 25911 25408 24539 24897 23928 24576 23965 24065 24285 24098 23649 24512 23800 24142 23877 13824 16393 17428 17067 18214 17693 18217 17991 18261 18039 27784 25564 25301 24685 24501 24065 24441 23543 24149 23794 23888 23339 24215 23463 23646 23728 24145 16941 19008 19340 19539 19520 20224 19389 20241 20053 30765 25717 25563 24205 24136 24098 24152 23390 24001 23673 23688 23264 23987 23264 23499 23572 24041 23283 19727 20391 20591 20480 21431 20643 20714 21316 21250 26532 24934 24985 24183 23524 24000 24838 23003 22800 24490 23467 22841 23433 24175 23358 23028 24239 20354 20943 22445 23077 22192 21233 23145 22002 21424 22171 25077 24021 23390 24004 23789 23584 23490 24008 22895 23265 23808 23427 23129 23509 23464 23495 23129 23836 23624 23658 23197 23960 23189 23244 23426 23603 23047 23448 23427 23556 22934 23800 23559 23593 23412 24064 22999 23523 23606 23497 22997 24004 23104 23429 23431 23597 22953 24024 23136 23393 23424 23649 23014 23626 23253 23379 22926 23705 23021 23301 23255 23685 22809 23689 23092 23220 23296 23460 22833 23644 22917 23546 23076 23465 22762 23748 22939 23369 23181 23420 23063 23483 22759 23797 22969 23160 23193 23393 22746 23697 23053 23158 23507 23322 22871 23892 22924 23482 23432 23292 23312 23612 22567 23829 22925 23182 23328 22564 23936 23127 22448 24652 22848 23200 24369 23005 22654 24560 23014 23119 24326 23047 23007 24521 22791 23344 24416 22975 22976 24536 22996 22740 24246 22949 22761 23589 23281 22834 23655 23080 23055 23516 23267 22939 23382 23209 23065 23256 23376 22915 23307 23157 23177 23111 23360 22912 23216 23165 23276 23112 23421 22900 23639 23015 23104 23430 23333 22951 23841 23444 23488 23415 23407 23347 23516 22763 23516 22784 23702 22876 23281 23351 23471 23223 23724 22898 23707 23121 23210 23255 23402 22969 23476 22711 23568 23063 23340 23053 23411 22795 23754 22902 23204 23267 23434 22725 23489 23139 23385 22796 23738 23104 23151 23197 23961 22914 23326 23418 23312 22690 23428 23057 23320 22797 23617 23260 23281 22976 23779 22925 23242 22813 23644 23489 23180 22696 23632 23162 23335 22773 23409 23885 23137 23086 22880 22885 24360 23146 23121 22671 23068 23731 23746 23578 23036 22261 22721 23517 24451 23252 23673 22864 22395 22445 23170 23936 23888 24151 23073 23287 22930 22670 22929 23015 22860 23272 23081 23475 23454 23568 23488 23519 23552 23477 23604 23400 23544 23316 23461 23441 23431 23395 23356 23369 23416 23269 23260 23323 23333 23232 23144 23276 23079 23298 23171 23341 23235 23300 23129 23286 23210 23367 23252 23527 23395 23641 23382 23693 23405 23749 23416 23694 23361 23620 23240 23584 23054 23511 22680 23247 22647 23173 22945 23397 22812 23511 22917 23702 22920 23913 23242 23761 23303 23209 22712 23296 22637 23287 22845 23347 23212 23429 23385 23619 23316 23575 22784 23107 22807 23221 22939 23825 23190 23708 22934 23074 22860 23316 23450 23643 23006 23259 22901 23307 22876 24185 23337 22696 22304 23008 23854 23920 23781 22939 22575 23012 22898 24443 23682 10636 12415 13836 15564 15783 15095 14685 14947 15872 35097 29540 26404 25856 25713 25542 14215 15966 16648 17087 17656 18145 18245 17676 17924 18015 28888 26960 26116 25080 24999 14167 18368 18802 19072 18989 19991 19720 19968 19414 19811 28160 26547 25431 24952 24520 24918 19776 20704 20379 20919 21065 21440 21159 21276 21009 28104 25175 25351 24033 24623 24185 21894 22075 22276 21911 22522 22088 22923 22182 22356 22062 24824 24203 24224 23488 24150 23657 24404 23568 23751 23408 23958 23901 23824 23278 23859 23461 24301 23426 23603 23310 23831 23845 24005 23091 23784 23380 24225 23526 23496 23238 23778 23847 24021 23183 23436 23331 24227 23581 23645 23174 24134 23719 24000 23159 23309 23248 24219 23767 23591 22613 23136 24044 24320 22925 22687 23083 24756 24029 23057 22430 23158 24433 24254 23147 22656 23152 24647 24120 23269 22491 23726 24320 24105 23961 22806 23273 23518 23671 23656 23336 23246 23555 23364 23701 23255 23243 23277 23456 23716 23577 23035 23241 23199 23881 23473 23271 22815 23249 23552 23677 23096 23253 23329 23834 23186 23969 23328 23280 22968 23400 23557 23869 23227 23363 
23002 23254 21404 23943 20970 22745 21151 23410 22244 21873 23634 21201 22021 22248 22138 23231 21456 23896 21400 21920 22986 21242 22922 21447 23626 21733 22065 23513 21760 22213 22498 22267 22763 21704 22915 22265 22343 22905 22140 22088 22625 21699 22400 21894 22392 22383 22097 22474 22520 21977 23042 21933 22382 22528 22100 22023 22795 21780 22832 22008 22749 22293 22215 22438 22560 21676 23046 21760 22781 22465 22422 21769 23139 21521 22599 22099 22311 21997 22580 21712 22828 21828 22359 22277 22363 22078 22938 21461 22983 22163 22455 22290 22697 21869 23276 21853 22312 22466 22232 21937 23086 21537 22796 21632 22709 22199 22258 22112 22980 21696 23096 22135 22385 22373 22468 21746 23146 21869 22455 22471 22156 21931 22964 21500 22583 22179 22162 21893 22514 21673 22612 22184 22146 22017 22829 21599 22696 21879 21863 22514 21861 21586 23033 21226 22160 22862 21504 21968 23062 21455 21562 22599 22007 21348 22696 22022 21233 21719 23219 20687 22116 22633 21000 21991 22933 20891 21952 23116 21005 21864 22813 21831 22103 22776 21648 22442 22556 22000 21945 23030 21847 22423 22759 22061 21958 22844 9397 8325 12064 10438 12561 11244 14016 32158 30496 30277 27204 27501 25236 27176 24799 25431 24322 24304 23815 22649 25157 23475 23671 23378 23385 23268 22961 23655 22433 23291 22473 23627 22642 23224 22568 23275 22445 22686 22977 22697 22791 22791 22528 22759 22128 23309 22040 22940 21856 23442 21938 23034 21889 23036 22538 22968 22274 22775 21968 22825 22295 22746 22002 22770 22439 22380 22103 22298 22485 22408 22325 22362 22633 22642 22224 22602 22358 22689 21752 23135 21776 22768 21517 23033 21885 23118 21613 23096 21866 22833 22130 22581 21999 22320 22491 22290 22218 22288 22021 22443 21855 22950 21720 22733 21601 23097 21695 22624 22418 22164 22381 22810 21786 22618 21544 23308 21789 22674 22881 21591 22430 21116 23093 22018 21011 23915 21588 23024 22843 21384 22768 21290 22455 22050 21171 23779 21632 22903 22706 21288 22830 22500 21734 22230 21993 22601 22325 21910 22891 21728 22627 22067 22191 22149 21897 22545 22222 21908 23075 21904 22768 22168 22343 22049 22043 22496 22453 22176 22850 21685 22735 21636 22843 21962 22263 22421 22279 22149 22808 21729 22613 21475 22753 21696 22311 22436 22469 22071 22926 6957 10663 11083 13564 13255 14589 15056 15473 15454 32593 30237 29143 26946 27514 25176 25857 24450 24800 23808 23983 23854 23748 22983 24192 22455 23831 22448 23643 22578 23126 23045 22733 23028 23023 22622 23236 22256 23591 22908 23126 23129 22631 22859 22947 22499 22912 22144 23640 21996 23256 22651 21864 22829 21736 23207 22339 21352 24256 21745 23257 22904 21900 22531 21669 22845 22242 21643 24090 21584 23409 21825 22892 22065 21396 23980 22076 22664 23162 22208 22510 22312 22551 22473 22140 23111 22137 22829 22413 22225 22468 22040 22814 22551 22157 23112 21896 22904 22411 22406 22262 22216 22620 22451 22109 23275 21904 23018 22304 22491 22432 22368 22375 22546 21680 23224 22029 23081 22265 22490 22117 22389 22264 22585 21681 23159 21846 22969 22186 22528 21943 22351 22343 22838 22051 23113 21544 22975 21718 22660 22078 22325 22691 22564 22275 22903 21801 22821 21705 23360 21189 22487 22484 22614 22240 22784 21847 22661 21707 23192 21959 22631 22647 22432 22213 22992 21657 22695 21690 22978 22016 22535 22870 22035 22600 22113 21753 22429 21079 24008 21333 23195 21624 22503 21616 21380 23427 21326 22545 21265 22967 21788 8852 11691 12478 14181 14153 17445 15903 17360 17606 17058 30768 27977 27707 25574 25469 24680 24274 23712 23407 23879 23128 23385 23288 22785 23022 22415 23481 22237 23143 22173 23003 22305 22609 22840 22617 22600 22776 22384 22788 21952 23168 21787 23052 22071 22659 22147 22415 22402 22648 21945 23265 21639 22992 21750 23132 22001 22764 22304 22321 22197 22229 22350 22632 21768 23271 21707 23003 21784 22999 21961 22679 22378 22277 22119 22528 22246 22496 21829 23251 21591 22973 21611 23104 22023 22912 22105 22485 21965 22154 22646 22322 22284 22349 22482 22405 22084 22954 21613 22573 21483 23262 22378 22539 23245 21436 22724 21398 22984 21180 22039 23244 21012 22889 20891 23560 21920 22083 23521 21826 22690 22385 21741 22356 20927 23830 21541 22753 22720 21865 22475 21642 23052 21988 22743 22385 22048 22423 22035 22387 22132 21917 22987 21787 22730 21877 22596 21949 22043 22593 22376 22397 22551 22146 22422 21753 22963 21500 22712 21645 22866 21856 22640 22217 22145 22220 22369 22189 22432 22027 23041 21630 22588 21465 23079 21965 22935 22337 22284 22152 22367 22011 22559 21771 23167 21564 22813 21575 22908 21865 22392 22272 22341 14189 16156 17139 18024 17920 19436 18241 19611 18724 29492 26705 26159 25142 24370 23649 23497 23701 23248 23142 22912 23027 22330 22724 23168 22068 22950 21652 23960 21738 23335 22125 23180 21691 22545 23309 21660 22400 21290 23767 21918 23030 21568 22346 22153 21981 23486 21361 22596 21112 24093 21561 23387 22039 22706 22359 22090 22961 21861 22698 21856 22968 22359 22500 22293 22507 22118 22327 22587 22239 22211 22150 22577 22523 22394 22754 21849 22375 21589 23041 21856 22768 21955 22409 21890 22112 22394 22206 22110 22139 22412 22470 22162 22472 22119 22209 22122 22595 22130 22375 21671 23146 21488 22957 21472 23095 22048 22874 21976 22304 22141 22201 22400 22363 22266 22622 22010 22566 21752 23059 21536 22817 21481 23249 21873 22861 22056 22313 21960 22145 22520 22226 22233 22312 22375 22400 21997 22932 21740 22677 21564 23072 21791 22448 23079 21377 22391 21059 23366 21730 22753 22409 21915 22158 21090 23879 21260 23249 21239 22282 21975 21132 23580 21751 22696 22165 22163 21943 21444 23619 21331 22260 22087 22475 22250 22240 22713 21741 22464 21921 22561 22043 22241 22472 21962 22124 21988 22576 22363 22231 22519 21771 18157 18304 20119 19592 20627 20679 20641 20777 20716 21090 25184 23723 24224 22492 23483 22144 23265 22115 22848 22637 22530 22428 22794 22127 22620 21854 23321 21770 22992 21856 22384 22125 22298 22428 22913 22117 23051 21542 22864 21963 22792 21763 22435 22367 22668 22099 23163 21636 22986 21632 22898 21809 22416 22467 22227 22272 22395 22288 22471 21568 23114 21744 22820 22016 22391 21934 22103 22519 22368 22105 23164 21224 22987 21568 22977 21616 21871 23389 21306 22723 21334 22886 22073 21892 23891 21256 23104 21745 21846 21869 21350 23528 21695 22923 22048 22080 21918 21767 22683 22025 22311 22451 22092 22403 21841 22791 21763 22650 21889 22680 21973 22252 22480 22087 22336 22333 22221 22316 21776 22860 21754 22835 21915 22512 21863 22094 22521 22336 22139 22728 21696 22704 21450 23148 21664 22422 22330 22311 22025 22204 22388 22534 22100 22729 21632 22632 21527 22993 21380 22912 22038 22338 21863 22305 22357 22376 22274 22306 22268 22589 21473 23208 21411 22940 21620 22802 21634 22408 22413 22159 22027 22249 22304 22116 22103 22968 21596 22662 21543 22995 21730 22784 21975 22409 21919 22277 22535 22202 22322 22216 22161 22187 21362 23780 21523 22989 21875 22264 21805 21333 23591 21633 22831 21778 22559 21828 21643 23356 21101 23216 21379 23022 22007 22327 22724 21754 22067 21049 22976 21878 22807 22030 22629 22103 22435 22583 21872 22409 21838 22484 22177 22216 22772 21711 22427 21551 23050 21733 22638 22295 22226 22096 22019 22507 22489 22284 22626 21880 22569 21660 22999 21687 22743 22049 22264 21853 22203 22344 22481 21934 22716 21667 22552 21371 23088 21783 22826 22373 22336 22095 22488 21708 22546 21469 23232 21705 22694 22224 22165 22122 22272 22240 22380 21572 23184 21604 23002 21590 22873 21757 22480 22509 22307 22204 22259 22233 22395 21593 22988 21645 22806 21840 22519 21986 22119 22573 22605 22135 22920 21383 22634 21349 22812 21987 21374 23398 21825 22585 22665 21509 22496 20690 23644 21790 22594 22854 21671 21900 21072 23439 22144 22281 23090 21199 22766 20977 23569 21714 22521 22905 21762 22740 21897 22528 22096 22051 22720 22213 22314 22649 21744 22713 21859 22581 21976 22149 22580 22425 22342 22661 21811 22588 21636 22854 21819 22716 22250 22249 22114 22176 22381 22503 21520 23089 21721 22630 22168 22186 22077 22537 21840 22529 21504 23081 21872 22449 22461 22144 22192 22636 21592 22664 21350 22981 21729 22468 22417 22445 22064 22697 21458 22677 21993 22544 21848 22199 22168 22535 21486 23062 2028 6589 9109 10707 11651 12817 12343 14003 13476 14742 32915 30913 29478 28322 26584 27065 24970 25555 25156 24796 24317 24801 23033 24522 23680 23217 23720 7344 11074 12695 12535 16313 14964 15065 17767 16788 32379 33125 28840 27244 28175 25891 24692 26690 24535 23413 25307 23534 22564 24794 23103 22186 23253 23290 12337 14215 16090 16209 17616 17857 18239 18471 19039 31041 28800 27560 26882 25378 25128 25021 24484 23704 24584 23381 23441 23670 23403 22535 23602 22985 14019 15141 17648 17878 18727 19226 19977 19245 20439 20392 29441 26578 26868 24730 24871 23695 24667 23573 23658 23331 24174 22698 23383 23313 23364 22248 23658 17977 19488 19619 21068 20569 20980 20971 22135 20772 21521 25691 24916 23315 24284 23175 23393 22401 23771 22754 22892 22697 23699 22188 22936 22976 22886 21968 23274 22557 23027 21968 23195 22799 22858 22352 23516 22470 22550 22765 22695 21876 22835 22393 22585 21813 23158 22416 21857 22898 23479 21437 23282 23260 21865 22176 23989 21623 22778 23936 22135 22151 24218 22150 21546 23744 22329 20913 23584 21705 21036 22051 22357 20848 23013 21955 21031 22689 22195 22112 22561 22314 21929 22918 22160 22062 22721 22208 21735 22935 22161 22248 22712 22475 22194 22944 21955 22523 22602 22397 22228 22931 21753 22727 22479 22231 22233 22528 21767 22789 21824 22631 22056 22192 22581 22568 21872 23213 21784 22855 22308 22337 22096 22720 21610 22839 22172 22294 22217 22719 21595 22877 21928 22374 22156 22522 21736 23015 21775 22404 22071 22721 21527 22893 22050 22332 22231 23041 21668 22788 22364 22615 22119 23045 21842 22485 22452 22565 21623 23224 22028 22496 22535 22752 21833 23040 22138 22220 22493 22455 21738 23099 21821 22609 22412 22358 22158 22797 21632 22842 22314 22029 22285 22048 21913 22402 21113 23633 22109 22276 23270 21479 22929 22211 21640 22690 21455 22384 21991 21186 22930 21981 21216 23920 21036 21383 23519 22424 21412 23863 21753 22324 23567 21682 22295 22764 22283 21876 23031 21998 22069 22603 22336 21789 22536 22469 22467 21852 22617 22595 22350 21924 22906 21921 22054 22455 22532 21849 22095 22395 22852 22167 22189 22037 22691 22061 22163 22017 23072 21839 22189 21595 22732 22256 22450 21682 22247 22116 23093 21706 22325 21495 22685 22391 22513 21805 22389 21581 22400 22150 23237 21862 22637 21812 22339 21548 22792 22230 22817 22458 22484 21999 22598 21780 22514 21536 22190 21495 22405 21841 22633 22013 22814 22064 23129 22247 23033 22293 23105 22211 23032 22213 23089 22177 23109 22048 22973 22036 23001 22075 23021 22023 22979 21953 22960 21959 22957 22129 23170 22187 23623 22452 23764 22567 23887 22861 23017 22487 23059 22551 22593 22055 22416 21504 21551 21328 21456 21030 21371 20748 21461 21526 22002 22504 21986 23232 22445 23645 22942 23547 22384 22625 22247 22391 21553 22231 21880 22700 22368 22160 22653 22352 22583 22547 22273 22297 21748 21899 21900 22361 21936 22959 22352 22674 21824 22117 21903 22377 22464 22849 21881 22213 21786 22597 21889 23042 22209 22227 21481 22536 22334 22824 22203 22514 21429 22453 21799 23134 22220 22203 3985 8023 9777 11459 11586 12648 12490 14047 13716 36997 33046 31321 29056 28408 27208 10154 11525 13951 14567 16749 16410 17102 16242 17794 35476 33911 30916 29266 27380 27847 12793 15217 15648 17555 18066 18995 18874 19147 18929 20100 31812 30201 27558 26929 26032 17319 17168 18558 18833 20395 20217 21037 20074 20333 21292 30075 28671 26195 25056 26282 25197 21155 19867 20732 21272 21666 22807 21840 20620 21467 26408 26789 24188 23543 23991 24084 24752 23447 22361 23048 23156 24647 23352 22672 23285 22953 23798 22913 22635 22528 22853 23407 23161 22452 22706 22772 23515 22901 22633 22330 22912 22996 23252 22313 22528 21818 23402 22790 22881 22148 22844 22780 23217 22446 22395 22145 23261 22489 22919 21921 22691 22328 23083 22374 22489 21983 23370 22371 22684 21738 22833 22619 23100 22203 22428 22064 23165 22321 22871 21858 22907 22387 23188 22461 22711 21868 22982 22204 23041 21996 22608 22022 22795 22397 22778 21661 22693 21871 23246 22023 22304 21697 22516 22402 22919 22189 22260 22139 23000 22267 22577 21561 22562 22279 22824 22499 22660 21777 22336 22048 23112 22415 22554 21383 22202 
