# Supplementary material for: An Active Feature Selection Strategy for DWT in Artificial Taste
Source: Hindawi journal article supplement (doi:10.1155/2018/9709505), 2018-01-01
Supplement: f1 [file 9709505.f1.zip › puerTea-hi-1.txt]

43472 43480 43468 43497 52 49 15373 20483 21122 22083 21381 22671 21478 22711 21696 23097 21760 22904 22021 23062 21933 23040 21824 23334 21848 22894 21818 23312 21826 23047 21744 23363 21920 22987 21848 23475 21830 23095 21923 23464 22007 23019 22144 23264 22346 23079 22544 22885 22448 22833 22532 22921 22231 22741 22644 22887 22217 22855 22471 23080 22592 23069 22406 23224 22293 23221 22229 23049 22018 23402 22132 23051 22016 23424 22421 23248 22251 23456 22336 22861 22859 22614 22749 22071 23584 22036 22610 22098 23181 22357 22295 22848 22701 22620 22374 22934 22257 22998 22302 23588 22077 23124 21901 23677 22637 22599 22490 22897 22889 22567 22562 23112 22689 22521 22496 22943 22894 22780 22884 22561 23114 22390 23232 22338 23160 22146 23247 22298 23239 22020 23505 22101 23171 21869 23626 22034 23118 21992 23512 22168 23094 22159 23460 22096 23192 21952 23616 22108 23081 22055 23440 22164 23036 22253 23434 22264 23093 21925 23613 22113 23172 21994 23372 22365 23252 22464 23168 22315 23182 22493 23127 22400 23031 22195 23410 22360 23012 22265 23305 22353 23304 22452 23009 22503 101 15137 18947 19597 20506 20780 20899 20626 21280 21060 31968 23852 24241 23340 23801 23089 23744 23000 23575 22723 23672 22645 23200 22494 23469 22518 23312 22205 23803 22153 23298 21916 23978 22003 22972 21903 23855 22332 23001 21897 23958 22144 22880 22358 23457 22917 22569 23004 22645 23105 22528 23063 22589 23121 22504 23365 22407 23061 22437 23516 22388 22970 22276 23401 22259 23095 22265 23408 22344 23232 22305 23441 22209 23145 22059 23537 22356 22993 22396 23293 22457 23041 22502 23064 22468 23073 22804 22795 22446 22877 22768 23184 22187 23232 22350 23380 22084 23484 22144 23234 22035 23591 22217 23025 22272 23366 22392 23143 22766 23087 22300 22912 22647 23020 22165 23133 22268 23322 22241 23434 22080 23204 22017 23545 22251 23086 22577 23057 22424 22856 22766 22885 22423 22856 22796 22950 22386 23206 22502 23205 22430 23431 22260 22951 22293 23333 22432 22993 22551 22978 22656 22752 23008 22580 22501 22440 22830 23079 21796 23744 21765 22821 22199 23267 22865 22448 23639 22104 22744 22276 23181 22829 22332 23448 22017 23143 21909 23884 22078 22628 22520 22627 23046 22064 23560 22392 22932 22601 23190 22679 22734 23031 16390 19968 21320 21098 21803 21037 22082 21352 21824 43485 24794 22868 23067 23266 23159 22677 23319 22574 23266 22186 23692 22437 23136 22608 23218 22583 23048 22917 23036 22381 22908 22651 23318 22365 23651 22081 23176 22212 23431 22382 22969 22749 23035 22298 23207 22448 23232 22255 23656 22141 23191 22321 23255 22395 22940 22816 22949 22270 22946 22437 23284 22264 23485 22075 23186 22087 23440 22419 22879 22760 22930 22388 22833 22729 23229 22235 23480 22128 23083 22167 23259 22507 22906 22830 22729 22498 22701 22791 23048 22402 23312 22130 23068 21933 23212 22506 22792 23047 22257 22629 22169 23006 22897 22125 23815 21735 22640 22621 22491 22804 21954 23571 22400 22280 23133 21905 22957 21748 23701 22378 22433 23296 22125 22670 22620 22823 23049 22332 22953 22983 22504 23316 22304 23016 22328 23104 22699 22708 23015 22659 22465 23092 22362 22951 22300 23074 22510 23051 22920 22812 22477 22973 22372 23243 22040 23552 22319 23189 22621 22824 22402 22900 22688 23227 22100 23500 22029 23085 22257 23170 22404 22843 22528 23331 22070 23490 22044 23165 22156 23481 22304 22677 22631 22914 22292 22924 22426 23376 22154 23534 22054 16259 20887 22011 21495 21668 21955 22246 21752 22710 21309 24861 22592 23578 22912 23076 23032 23057 22529 23156 22507 23378 22160 23528 22451 23275 22710 22872 22604 22734 22779 23041 22520 23588 22300 23004 22597 22695 22379 22624 22830 23212 21714 23783 22296 22723 23208 22405 22913 22112 23232 23033 22096 23865 21874 22650 22732 22583 22939 21962 23562 22520 22377 23211 22183 23080 21819 24028 22017 22665 22810 22422 23013 22278 23440 22352 22890 22572 22894 22662 22464 23020 22983 22355 23284 22356 23126 21995 23382 22382 22864 22656 22824 22392 22776 22476 23161 22212 23523 22140 23010 22437 22928 22476 22712 22648 23183 22247 23527 22058 23078 22528 22945 22296 22860 22459 23258 21895 23541 22138 23078 22572 22873 22353 23000 22432 23189 22080 23644 22012 23159 22368 23050 22353 22806 22445 23270 22046 23392 22110 23008 22259 23264 22290 22796 22578 23324 21943 23600 22184 23040 22443 22784 22363 22727 22510 23148 22000 23254 22308 22984 22709 22627 22307 22938 22421 23131 22069 23428 22376 22969 22876 22727 22580 22720 22614 23225 21752 23696 22548 22465 23595 22262 22400 23143 22062 23032 21879 23113 22811 21891 23604 22370 20979 22926 21181 22054 21857 22103 22432 21494 23144 26346 23013 23443 22827 22637 22901 22635 23122 22316 23430 22760 22866 23096 22640 22577 23048 22543 23077 22135 23315 22440 22837 22793 22893 22376 22948 22468 23276 22314 23412 22180 22998 22512 22900 22454 22848 22444 23261 22007 23523 22290 23043 22576 22896 22395 22725 22545 23289 22080 23600 22103 22969 22265 23052 22444 22668 22751 23037 22185 23430 21976 23066 22207 23138 22353 22688 22692 23164 22118 23529 22090 22898 22485 22965 22420 22792 22644 23081 21974 23527 21975 23042 22145 23335 22479 22797 22803 22695 22502 22708 22649 23081 22361 23326 22124 22955 22224 23019 22522 22766 22816 22617 22528 22480 22973 22602 22113 23296 21952 22925 21761 23588 22373 22330 23335 22025 22580 22009 23204 22775 22480 23269 22162 23054 21677 23767 22165 21826 22384 22754 22893 21950 23740 22048 22438 22804 22816 22650 22565 22930 22770 22514 22544 22931 22956 22413 23239 22321 22945 22113 23280 22402 22866 22497 22970 22597 22640 22810 22809 22352 22932 22648 23000 22219 23239 22161 23159 22060 23488 22066 23040 22149 23277 22317 22730 22542 22912 22272 22679 22680 23040 22128 21953 21648 22873 21528 23201 21930 22836 22164 23012 22102 23156 22709 23040 22262 23107 22267 23364 21985 23542 22189 23049 22357 23343 22416 22912 22704 23051 22145 23173 22254 23175 21962 23543 22146 22955 22391 22944 22464 22679 22839 22761 22390 22813 22428 23087 22106 23356 22268 22928 22474 22905 22594 22552 22962 22645 22404 22679 22647 23110 21952 23764 21774 22712 21909 23506 22487 22551 22536 22672 22813 22044 23610 21953 22613 22240 23300 22661 22417 23494 22176 22955 21857 23649 22421 22602 23104 22279 22930 22038 23399 22441 22840 22637 22850 22685 22445 22971 22576 22395 22920 22567 23112 22053 23410 22227 22926 22361 22971 22527 22824 22720 22792 22512 22597 22716 22800 22325 22884 22544 23153 22033 23442 22021 22982 21965 23489 21986 23031 22157 23342 22294 23542 22412 23041 22365 22743 22688 22780 22241 22912 22491 23086 21798 23255 22204 23271 22004 23479 21892 23200 21858 23570 22053 23081 22038 23383 22290 22436 22484 23152 22340 22968 22656 22793 22211 22864 22635 22870 22209 23041 22400 23068 22229 23316 22103 23092 21892 23400 22259 22988 22080 23339 22179 22839 22167 23170 22327 22422 22496 22823 22555 22725 22674 22646 22656 22260 23520 22170 22640 21914 23506 22048 22825 21996 23548 22123 22871 21814 23521 21990 22483 22025 23433 22338 22358 22517 23507 22075 22567 22194 23545 22264 22406 22448 23172 22405 22729 22488 23043 22443 22242 22640 22898 22605 22831 22887 22602 22690 22509 22914 22596 22532 22478 22848 22869 22408 22548 22679 22902 22301 22772 22773 22997 22348 22924 22496 23056 22147 23282 22240 23144 22134 23335 22150 23241 22102 23383 21920 23172 21814 23543 22041 23181 21812 23601 21938 23081 21963 23447 22080 23062 21857 23392 22122 22984 22165 23424 22186 22999 22288 23291 22407 23175 22426 22952 22318 23254 22388 23053 22326 23034 22429 23137 22442 23522 22325 23005 22376 23201 22444 22962 22408 22455 22373 22932 22369 22620 22726 22702 22360 22493 22778 22720 22349 22739 22789 22680 22361 22515 22858 22681 22357 22595 22828 22812 22402 22576 22937 22564 22439 22343 23252 22487 22391 22665 23042 22784 21911 22900 22642 23068 22166 23564 22227 23052 22216 23344 22432 22714 22433 22792 22586 22829 22359 23235 22460 23008 22208 23408 22408 22615 22553 22281 23120 22423 22881 22430 23129 22609 22845 22415 23134 22544 22925 22624 22903 22660 22746 22454 23109 22510 22856 22458 23044 22488 23006 22562 23017 22524 22839 22274 23380 22169 22887 22260 23296 22319 23349 22344 23145 8072 19203 18419 20218 19849 20751 20306 20681 20279 43428 26764 24288 22639 23264 23008 23229 22712 23164 22953 23048 22707 23054 22858 22950 22470 23095 22738 17505 20225 22080 20873 22029 21026 22277 20912 22124 43466 25525 22311 23563 22356 23849 22230 23429 22297 23744 22306 23556 22376 23479 22219 23287 22144 56 20132 22311 21123 22638 21257 22183 21453 22657 21715 28438 22589 23590 22609 23195 22688 23258 22781 23193 22503 23160 22728 22890 22789 22788 22912 22424 15904 21334 22181 21328 23121 21837 22374 21815 22930 21668 24029 22568 23767 22351 22965 22183 23738 22364 23047 22520 23232 22661 23024 22382 23255 22576 22959 20956 23136 21717 22720 22410 22948 22185 22898 22181 22852 22992 23238 22996 23140 22600 23110 22676 23181 22578 23092 22497 23303 22416 23226 22400 23378 22257 23138 22317 23324 22314 23309 22309 23057 22564 23117 22273 22817 22793 22906 22343 22808 22758 22784 22456 22940 22674 22901 22473 23076 22583 23003 22356 23148 22369 23173 22333 22990 22269 23311 22503 23128 21864 23508 21984 23223 21976 23639 22016 23215 21856 23616 22065 23170 21811 23428 22037 23149 22076 23344 22125 23309 22104 23320 22061 23353 22236 23400 22273 23241 22240 22909 22693 22872 22336 22626 22951 22722 22336 22738 22837 22817 22304 22618 22833 22844 22416 22572 22760 22737 22411 22637 22945 22653 22445 22285 23348 22245 22579 22183 23505 22239 22507 22124 23385 22356 22375 22456 23345 22453 22401 22080 23552 22031 22610 21960 23592 22050 22819 21927 23513 21964 22850 21947 23387 22188 22954 22215 23201 22454 22991 22248 23390 22226 23088 22177 23280 22505 22983 22499 22922 22660 22881 22393 22720 22887 22660 22432 22473 22886 22803 22573 22828 22665 22740 22568 22917 22596 22912 22472 22950 22513 22961 22550 22920 22550 23361 22328 22951 22313 23299 22304 22997 22344 23403 22237 23052 22224 23437 22096 23092 22085 23379 22157 23015 22117 23312 22253 22977 22273 23175 22212 23061 22229 23399 22359 23092 22402 23100 22489 23178 22470 22937 22280 22934 22485 23252 22421 23147 22264 23173 22214 23405 22261 23113 22263 22985 22219 23381 22263 22998 21991 23433 22315 22936 22239 23210 22345 22876 22116 23343 22241 23010 22021 23304 22154 22957 21960 23441 22144 22919 21991 23444 22198 22979 21583 23783 21847 22950 21884 23630 22311 22501 22192 23136 22631 22260 22360 23324 22261 22961 22817 22996 22600 22538 22777 22752 22844 22566 23253 23109 22408 22546 22442 23110 22498 22343 22642 22683 22956 22124 23093 22443 23063 22528 23140 22306 22920 22330 23258 22230 22978 22109 23348 22251 22894 22032 23361 22278 23067 22051 23373 22144 22886 22085 23393 22183 23051 22016 23453 22166 23052 21961 23432 22028 23124 21897 23485 22029 23069 21850 23536 22012 23291 21989 23414 22045 23329 22080 23437 22052 23176 22213 23392 22107 23123 22152 23475 22129 23229 22041 23255 22256 23309 22583 23130 22337 23164 22132 22880 22624 22983 22330 22640 22727 22897 22165 22648 22644 22850 22226 22826 22610 22924 22188 22631 22733 22674 22368 22674 22839 22765 22330 22567 22825 22592 22459 22497 51 14950 18249 19605 20425 20457 20187 20456 20796 20537 37120 24708 23261 23455 22768 23218 18760 21646 21513 21433 21680 21984 21662 21838 21957 43460 23575 23053 22317 24238 22214 19424 20760 22831 21108 22245 21133 23008 21540 22475 21586 24717 22917 23245 23065 23024 16599 21792 22400 22445 22706 22103 22487 22245 22807 22153 24219 22870 23658 22651 23170 22394 22971 21972 22876 21767 23268 22104 22865 22050 22999 24449 23361 22585 23061 22844 22908 22536 22905 22908 22804 22508 22830 22631 23133 22533 23240 22375 23324 22331 23238 22225 23425 22211 23045 22151 23528 22226 23127 21821 23563 22067 23175 21888 23573 22074 23242 22130 23204 22359 23149 22329 23009 22726 22919 22304 22743 22841 22922 22209 22779 22706 22951 22273 22828 22520 23040 22468 22752 22544 23200 22465 22981 22328 23367 22442 22912 22201 23471 22235 22953 21966 23441 22196 23041 21987 23383 22260 23072 22263 23320 22440 22868 21941 22620 23078 22342 22407 21991 23634 21989 22853 21975 23388 22136 22893 22244 23187 22376 22841 22602 22530 23189 22552 22638 22564 23040 22689 22196 22412 23008 22932 22407 22917 22688 
21272 21588 21946 21161 21341 21150 21794 21133 21624 20736 21576 21620 21944 21049 21260 21315 21449 21067 21165 21166 21947 21496 21266 20912 21653 21165 21367 20827 21687 21640 21816 21004 21141 21323 21376 20800 20811 21936 20787 21447 20649 22001 20742 21122 20979 21451 21151 20900 21019 21299 21139 20873 21323 20983 21317 21040 21719 20727 21367 20615 21900 20636 21367 20769 21829 20701 21249 20809 21720 20981 21321 21191 21419 21024 21120 21424 21157 21046 21096 21498 21206 20887 21227 21145 21530 20709 21732 20743 21592 20702 21879 20700 21488 20619 22016 20608 21514 20613 21881 20919 21475 20983 21632 21097 21130 21224 21523 20951 21404 21209 21744 20920 21520 21221 21355 21207 21033 21478 21213 21124 20975 21549 21239 21100 21238 21351 21191 21036 21164 21445 21324 21090 21555 21239 21612 20314 21504 21101 21617 20816 22041 21014 21755 20875 21989 20773 21620 20753 22126 20815 21775 20812 22125 20693 21637 20669 21914 20873 21649 20749 21939 20596 21589 20272 22417 20450 21417 20483 21639 21171 21037 21129 21517 21217 21402 21099 21687 21056 21171 21056 21704 21062 21111 21213 2765 57 53 64 51 3036 4748 7367 7666 9553 43333 36717 27666 25700 23463 24007 22481 21606 21013 22226 21223 21795 20873 22240 20930 21768 20860 22123 21097 21614 21235 21893 21255 21551 21456 21472 21349 21467 21357 21802 21267 21545 21429 21469 21136 21359 21592 21365 21135 21377 21607 21344 20996 21210 21585 21431 21024 21478 21312 21673 20963 21628 21322 21371 21061 21498 21211 21461 21085 21317 21504 21490 21083 21616 21115 21577 20940 21884 20853 21575 20828 22023 20885 21419 20648 21848 21143 21164 21345 21280 21527 20711 22187 20527 21293 20807 22326 20774 21133 21095 21593 21492 20810 22135 20561 21589 20470 22351 20764 21284 21431 21248 21547 21129 22120 20755 21515 20771 22039 21046 21473 21282 21509 21325 21202 21627 21168 21171 21301 21457 21442 21061 21703 21035 21569 20993 22019 20786 21488 20853 21767 21143 21929 21435 21393 21120 21405 21492 21305 20966 21448 21404 21643 21006 21976 20786 21576 20881 21875 20951 21664 21357 21392 21127 21316 21351 21575 21345 21762 20864 21568 20768 22029 20932 21538 20909 21817 21132 21509 21504 21370 21013 21404 21381 21579 21106 21913 20856 21697 20743 21860 56 13248 16153 17545 17760 18841 18264 19024 18107 19367 30688 25308 22777 22501 21916 21976 22148 21723 21531 21768 21514 21917 21300 22281 21191 21742 20970 22023 21413 21403 21655 21272 21680 20813 22258 21207 21139 22161 20744 21633 20663 22119 21584 21085 22333 20736 21477 20636 22288 21432 20904 22301 20629 21520 20829 21918 21441 21021 22231 20945 21635 20712 21997 21248 21245 21444 21349 21271 21243 21597 21496 21287 21686 21196 21624 21007 21941 21095 20816 21531 21444 21278 21115 21598 21281 21144 21709 21061 21645 20787 22003 21063 21472 21296 21467 21112 21208 21635 21552 20932 21872 20952 21774 20667 22032 21117 21500 21426 21397 21041 21469 21238 21792 20752 22041 20869 21511 21195 21664 21229 21357 21430 21566 21534 21924 20949 21581 21059 21676 21279 21189 21590 21619 20835 21916 20865 21761 20760 21889 21200 21385 21629 21430 21037 21654 20992 21596 20871 21942 21130 21433 21521 21173 21115 21440 21378 21704 20769 22011 21090 21649 21488 21302 21345 20810 22075 21184 20887 22189 20551 21468 20853 21591 21671 20582 22226 21176 21130 21752 20992 21686 20628 22484 20907 21340 21774 20954 21751 20823 22281 21431 21151 6813 15358 17696 18291 18407 18763 18133 19319 18542 18947 30473 24352 23045 20893 21457 21417 21031 21719 20913 21411 21012 21737 21301 21220 21574 21347 21090 21719 20966 21589 20791 22023 21076 21540 21869 21869 22311 22757 22359 22688 21875 22541 21901 21897 22211 22211 21248 22056 21191 22092 21121 22310 21605 21881 21901 21792 21404 22096 21500 22256 21020 22469 21307 21891 21355 22163 21562 21716 21824 21838 21478 21666 21733 22145 21138 22592 21162 21959 21457 21891 21542 21597 21815 21772 21685 21622 21494 21964 21093 22172 21346 22171 21797 21608 21475 21686 21740 21975 21397 22208 21113 21673 21335 21769 21687 21390 22279 21664 21440 22658 20953 21515 21635 21378 21895 21006 22259 21825 21120 22715 21109 21692 21932 21096 21814 21045 22416 21799 21205 22567 20871 21615 21612 21411 21908 20926 22249 21485 21229 21744 21683 21465 21573 21419 21768 21174 22023 21677 21625 22035 21577 21492 21885 21192 21856 21236 22034 21546 21668 21921 21740 21864 22217 21114 21882 21123 22041 21533 21565 21818 21739 21365 22033 21271 21852 21162 21910 21488 21550 21568 22007 21044 22435 21108 21816 21543 21649 21365 21587 21594 21978 15437 20615 19948 20845 20588 20611 20302 20907 20275 21110 22314 22511 21348 21603 21557 21426 21176 21545 21174 21920 20682 22106 21089 21788 21531 21273 21191 21443 21143 21685 20901 21990 21070 21184 21422 21248 21161 21401 21446 21511 21052 22080 21001 21449 21426 21264 21313 21193 21597 21649 20709 22505 20837 21341 21440 21508 21747 20736 22289 21537 21190 22629 20903 22836 21773 21946 21980 21371 22800 21345 21487 22433 20977 21792 21301 21881 21911 20807 22488 21592 21865 21918 21616 21417 21674 21679 21912 21227 22181 21417 20981 21792 21517 21577 21355 21685 21702 21389 21923 21270 21929 20995 22233 21337 21559 21768 21586 21392 21507 21773 21725 21182 22207 21477 22048 21230 22436 21275 21822 21587 21856 21375 21463 21754 21833 21708 21912 21056 21885 20992 22272 21237 21661 21207 21987 21455 21688 21825 21543 21257 21842 21493 22021 21174 22238 21145 21824 21252 22006 21443 22272 21636 21793 21303 21527 21769 21805 21225 21849 21403 21828 21143 22103 21136 21705 21329 21838 21464 21788 21812 21652 22065 21686 22006 21668 21476 21655 21592 21760 21424 21933 21030 21916 20774 22649 20595 21351 21272 21546 21696 20867 22409 19764 20426 20737 20968 21320 20284 22164 20175 21105 22417 22520 21430 21353 21968 20740 21470 20976 21917 21652 21290 21646 21373 21217 21329 21541 21581 21148 21881 21002 21447 21134 21702 21409 21452 21693 21261 21385 21371 21661 22125 21242 22333 21136 21785 21345 22162 21496 21671 21793 21611 21415 21675 21449 22069 21529 22391 21180 21934 21161 22237 21389 21903 21632 21799 21318 21521 21839 21523 21304 21820 21649 21856 21257 22152 21193 21764 20748 22172 21111 21650 21305 21734 21356 21433 21808 21616 21237 21726 21323 21874 20940 22355 20978 21777 21261 22081 21419 21605 21787 21468 21441 21427 21520 21888 21295 22099 21074 21792 21056 22190 21286 21687 21317 21945 21495 21504 21735 21504 21495 21401 21840 21620 21451 21879 21743 21786 21221 22325 20851 21963 20647 22689 20817 21687 21231 21941 21552 21313 22408 21162 21709 20840 22663 20948 21421 20973 22497 21348 21282 21568 21992 21881 21184 22457 21562 21575 21536 21790 21560 21296 21559 21601 21781 21568 22035 21223 21808 21380 22136 21189 21761 21033 22205 21237 21779 21442 21897 21459 21644 21512 21753 21451 21794 21645 21602 21372 21433 21805 21550 21386 21543 21800 21639 21235 21803 21465 21777 21517 22007 21352 21741 20672 21867 21370 21762 21124 21664 21394 21808 21213 22064 21063 21970 20987 22332 21080 21981 21193 22217 21065 21816 20937 22314 20895 21693 20820 22075 20999 21779 20864 22329 20931 21881 21400 22256 21091 21710 21006 22178 21336 21117 21451 21664 21440 21652 21661 22150 22189 21409 21558 21537 21338 21297 21784 21336 21379 21667 21747 21421 21211 21677 21941 21344 21355 21348 21977 21509 21373 21286 21673 21512 21640 21928 21412 21798 21290 22134 21105 21815 21213 21915 21325 21909 21111 22406 21029 21859 20772 22638 20901 21818 20614 22656 20809 21639 20624 22569 20687 21551 21163 21830 21693 21313 21250 21949 21341 21452 21387 21909 21425 21415 21376 21870 21409 21413 21528 21691 21719 21260 21879 21498 21822 21232 21904 21460 21817 21511 22073 21289 21748 20975 22031 21248 21839 21157 22080 21212 21919 21066 22177 21105 21909 20983 22247 21059 21831 20912 22354 21354 22088 20772 22112 21137 21651 21058 22216 21142 21798 20968 22292 20865 21784 20859 22282 20998 21725 21107 22160 21043 21776 20940 22138 20992 21793 21145 22066 20983 21992 20784 22193 21017 21859 20999 22336 21023 21851 20858 22253 21043 21755 20956 22214 21072 21659 21014 22181 21123 21730 21073 22100 21324 21958 21324 22289 21008 21797 21013 22144 21012 21716 34 366 16947 17454 16723 18887 17155 18133 17537 43366 35428 24797 20982 22273 21326 21789 21365 22672 21466 21846 20845 21901 21200 21088 21713 20983 62 12304 17750 17840 18969 18221 20189 18795 19159 18662 31136 24226 22629 21667 22501 21400 21826 21280 22193 21338 21753 21199 22153 21280 21573 21287 21944 12215 18379 19387 20381 19926 20379 20245 20211 20224 20184 25945 22563 22054 21742 21964 21652 21416 21527 21750 21531 21319 21424 21753 21448 21229 21550 21477 18790 19716 20776 20323 20845 20258 20729 20736 20889 20435 22981 22080 21999 21388 21895 21482 21877 21277 21515 21609 21686 21171 21429 21482 21538 21136 21346 20416 20985 20680 20833 21232 21079 20793 21095 21127 23355 21629 21502 21648 21463 21132 21300 21641 21384 21208 21335 21692 21507 21128 21269 21632 21429 21194 21349 21645 21432 21165 21248 21697 21168 21290 21144 21591 21305 21281 21305 21456 21408 21360 21280 20901 22185 20880 21383 20698 22400 20696 21378 20421 22552 20538 21581 20432 22487 20567 21696 20578 21945 21277 21504 21109 21353 21556 21420 21281 21233 21779 21265 21606 21355 21985 21378 21419 20937 22042 20993 21413 20865 21885 21033 21356 20925 21863 21077 21357 20851 21770 21048 21580 21005 21811 21095 21659 21108 21819 20890 21572 21137 21778 21077 21585 20916 21867 20979 21674 20952 21779 20936 21654 20927 21893 20887 21632 21049 21801 20977 21697 20959 21831 20794 21669 20803 22000 20768 21725 20911 21899 20860 21607 20880 21735 21017 21692 21440 21661 21194 21460 21380 21641 21225 21530 20995 21277 21383 21404 21103 21369 21433 21447 20919 21505 21203 21568 20969 21232 21417 21403 21101 21137 21445 21207 21224 21252 21339 21389 21063 21325 20913 21737 21070 21461 20939 21844 20992 21421 20864 21912 20936 21464 20731 21907 20818 21513 20641 22052 20725 21565 20412 22230 20537 21587 20435 22316 20494 21745 20760 22208 20716 21729 20683 22336 20683 21687 20689 22374 20515 21568 20460 22439 20579 21548 20344 22446 20525 21489 20514 22488 20588 21211 20928 21605 21197 21113 21073 21571 21068 21221 21038 21684 21130 21216 21032 21544 21198 21228 21101 21487 21318 21239 21217 21551 21241 21217 21329 21415 21276 21309 21332 21265 21607 21122 21619 21156 21552 21127 21386 21224 21369 21156 21216 21322 21536 21108 21521 21363 21359 21099 21293 21417 21323 20966 21185 21523 21270 21048 21117 21487 21279 21053 21200 21503 21306 20931 21227 21329 21405 21100 21128 21558 21226 21043 21224 21492 21341 21173 21024 21520 21329 20894 21180 21408 21409 20896 21313 21430 21493 20971 21634 21102 21570 20986 21693 21059 21552 21005 21445 21259 21513 21093 21671 21075 21403 21100 21654 21100 21486 21024 21552 21226 21569 21064 21445 21524 21425 21258 21259 21600 21146 21178 20805 22320 20617 21248 20715 22262 20778 20975 20849 22224 20740 21275 20608 22256 20844 21264 20647 22326 20576 21437 20517 22245 20619 21440 20482 22241 20705 21616 20825 21913 21015 21637 20876 21751 21003 21569 21127 21653 21076 21532 21085 21719 21235 21410 21236 21495 21076 21698 20913 21672 21088 21490 21216 21582 21159 59 11479 15433 16693 17644 17545 18120 18021 18439 17861 43364 28022 22507 21325 21810 21904 51 12712 15110 15798 16526 16128 16770 16914 17129 43351 31303 23373 22976 22162 21944 63 16525 17408 18801 18387 19350 18480 19397 18548 43344 27746 23919 22061 23126 21795 5561 17429 20458 19193 20613 19525 21032 19666 20904 19695 27931 22813 23028 21953 22791 5775 20248 20283 21494 20779 21360 20762 21137 21173 21302 26235 22632 22381 22231 21879 22312 21884 22237 21743 22277 21533 22755 21329 22138 21025 23024 20941 22204 20992 23001 20936 22221 21070 22709 21193 22141 21352 22266 21915 22010 20890 21765 22289 21561 21484 21376 22650 21302 21877 21113 22734 21248 21986 21469 22212 21577 22053 21682 22055 21639 22051 21485 21495 21360 21191 21082 21091 21600 21232 21299 21196 21621 21324 21258 21225 21748 21363 21239 21583 21496 21638 21157 21942 21239 21883 21050 21557 20933 21964 20955 21593 20800 22126 20886 21729 20814 22125 21143 21729 20355 21796 21239 21684 21027 21483 21504 21516 21014 21332 21649 21333 21113 21315 21536 21484 21121 21188 21671 21287 21107 21200 21605 21345 21129 
21712 21976 21842 21850 21042 21487 21608 22304 22242 22053 21435 21888 21770 21893 21722 21509 21728 22360 21980 21797 21649 22058 21585 22032 21225 22312 22006 22131 21241 21893 21805 21899 21330 21748 22076 22281 21515 21773 21661 22161 21514 21831 21591 22661 21709 21767 21615 22089 21613 21719 21425 22546 21944 21917 21216 22119 21651 21945 21291 21914 22095 22368 21353 21819 21786 21967 21700 21604 21458 22466 21943 22141 21381 22336 22191 21770 21737 21523 21850 21943 21479 22466 21145 21922 21014 22684 21301 21554 21652 22010 21988 21529 22514 22180 21944 21509 22679 21110 22169 20931 22842 20877 21943 20967 22173 21693 21620 21623 22119 21657 21670 21460 22020 21673 21787 21829 21792 22023 21704 22068 21541 22165 21536 22300 21392 21997 21378 22365 21366 22071 21205 22509 21319 22072 21132 22446 21399 21952 21403 22275 21602 21929 21473 22449 21437 21977 21365 22333 21488 21893 21603 22281 21653 21897 21499 22368 21465 21953 21345 22420 21465 22029 21633 21993 21677 21947 21832 22045 21622 21907 21849 21942 21638 22007 21619 22094 21761 21440 21719 22040 21658 21915 21909 21762 6587 16373 18676 19502 19841 19957 20508 20476 19764 43328 24900 22693 22112 22503 21608 22208 21605 22436 21613 22201 21292 22337 21637 22196 21242 22636 21164 22222 21016 22957 20981 21876 21028 22765 21170 21710 21290 22759 21144 21869 21124 22573 21440 21600 21891 21458 21947 21399 22444 21257 22074 21664 22234 21571 22108 21497 22277 21513 21940 21425 22332 21527 21941 21346 22400 21401 21923 21409 22274 21479 22053 21161 22461 21443 21920 21512 22200 21722 22101 21719 22080 21698 21974 21907 21770 21745 21533 22016 21838 21469 21942 21773 22145 21580 22393 21281 22173 21376 22480 21297 22062 21319 22330 21639 21976 21784 21952 21692 21840 21927 21948 21408 22071 21847 22103 21121 22393 21286 22085 21296 22475 21293 21990 21484 22226 21691 21857 21959 21810 21626 21677 21996 21896 21501 21824 21892 22146 21436 22220 21367 22086 21237 22371 21453 21865 21709 22253 21652 21824 21981 21700 21683 21497 22317 21809 21090 22258 21111 22201 20790 22827 21294 22018 21904 21319 21896 21005 22715 21364 21511 21952 21656 22291 21149 22890 20971 22054 21096 22636 21648 21657 22497 21139 22023 21255 22289 21731 21984 21933 21664 21793 15 18628 20337 20680 21922 20796 21045 20951 21255 21146 28711 22768 21601 21647 21639 22018 22115 21717 22277 21405 21937 21495 22192 21744 22102 21946 21906 21750 21728 21909 21929 21582 22183 21382 22216 21114 22483 21493 22296 21707 21864 21542 21712 21836 22152 21414 22253 21447 22161 21227 22363 21588 21928 21847 21833 21504 21788 21851 22121 21446 22333 21377 22082 21176 22536 21427 22059 21719 21936 21604 21748 22007 21824 21484 22069 21550 22110 21216 22445 21523 21856 21760 21943 21787 21757 22186 21844 21580 22040 21559 22108 21255 22411 21323 21891 21590 21879 21811 21230 22621 21437 21473 22077 21355 22153 20786 22715 21572 21414 22524 21179 21710 21416 22181 22152 21146 22920 20941 21868 21481 21930 22048 21056 22785 21492 21447 22585 21417 21679 21816 21639 22056 21377 22455 21496 21728 22019 21765 21734 21536 21973 21970 21507 22323 21481 21818 21732 21973 21737 21603 22076 21873 21228 22442 21305 21973 21447 22158 21704 21683 22086 21866 21963 22164 21440 22208 21213 22447 21586 22046 21833 21799 21456 22087 21463 22130 21236 22425 21463 21921 21462 22091 21734 21720 22061 21832 21488 22313 21266 22208 21192 22391 18717 21559 21495 21248 21189 21425 21272 21957 20976 40680 21913 22147 21985 21943 21809 21767 21959 22058 21588 22457 21332 22034 21494 22168 21836 21736 22055 21781 21510 21963 21635 22112 21172 22313 21715 21655 22210 21825 21500 22295 21191 21930 21275 22061 21943 21229 22712 21117 21472 22112 21244 22224 20864 22554 21795 21551 22627 21061 21676 21296 21981 22104 21288 22768 20944 22001 21031 22464 21802 21492 22385 21450 22058 21333 22232 21739 21901 22225 21620 21704 21777 21575 22029 21494 22324 21339 21965 21555 22057 21839 21728 21997 21776 20957 22352 21368 22040 21230 22376 21720 21954 22133 21718 21546 21928 21568 22222 21174 22426 21652 21921 21984 21846 21505 22230 21272 22108 21293 22245 21760 21802 21993 21947 20871 22389 21411 22229 21090 22447 21590 21871 22020 21769 21443 22227 21319 22016 21328 22360 21536 21700 21819 21957 21386 22132 21427 22218 21136 22256 21702 21797 22070 21900 21689 22245 21365 22033 21639 22208 21814 21657 21959 21900 21361 22353 21389 21973 21397 22009 21789 21469 22172 21734 21778 22495 21131 21942 21648 21600 22016 21161 22172 22228 21326 22949 21152 21783 22107 21267 21867 21383 14990 21673 20536 22599 21213 21430 22296 20841 21344 21205 23141 22161 21374 22193 21857 21781 22288 21522 21920 21678 21911 21884 21433 22200 21938 21808 22226 21385 21873 21714 22025 21837 21664 21996 21869 21644 22355 21408 22023 21341 22294 21751 21991 22116 21912 21522 22350 21317 22051 21412 22128 21730 21799 22003 21722 21393 22125 21463 22149 21213 22328 21722 21835 21878 21776 21588 22016 21735 22278 21174 22506 21506 21625 21880 21729 21610 21973 21456 22292 21133 22360 21663 21817 21965 21787 21571 21884 21627 22248 21217 22482 21493 22033 21780 21913 21706 21815 22161 21746 21528 22115 21487 22091 21314 22439 21490 21984 21989 21837 21742 21677 22170 21747 21554 21705 21979 22140 21115 22843 21031 21868 21476 21879 22047 20987 22695 21273 21610 21911 21744 22240 21244 22804 20906 21834 21224 22162 21866 21786 22343 21133 21929 21015 22410 21751 21827 22080 21641 21728 21582 22096 21737 21726 21940 21685 21988 21485 22283 21462 21831 21584 22048 21713 22040 22023 21687 21775 21704 21945 22059 21860 21923 21728 22177 21459 22353 21395 22053 21201 22402 21540 21949 21809 22094 21728 21895 21964 21818 21530 21968 21768 22177 20750 22300 21234 21810 21308 22145 21621 21905 21705 25626 21821 21795 22017 21963 21916 22391 21367 22080 21380 22390 21748 21906 21769 21846 21656 21780 21859 22129 21361 22346 21328 22109 21250 22340 21677 22023 21952 21787 21607 21676 21943 21904 21535 22324 21392 21961 21333 22252 21591 21872 22028 21698 21568 21737 22235 21777 21746 22390 21129 22189 20848 22721 21344 21764 21574 21735 21707 21719 22421 21223 21875 21032 22723 21326 21481 21907 21579 22159 20976 22838 21109 21673 21591 21831 22085 21296 22331 21539 21883 21542 22072 21830 21888 22211 21608 21826 21515 22112 21975 21696 22240 21404 21936 21372 22010 21671 22083 22029 21960 21875 21638 22071 21696 21600 21744 21863 21978 21536 22108 21525 22129 21304 22528 21381 21959 21218 22465 21589 21976 21670 22037 21673 21925 21964 21726 21540 21752 21911 22021 21571 22053 21571 22232 21487 22407 21263 22124 21126 22520 21372 22051 21296 22312 21401 21963 21548 22159 21847 22067 21952 21792 21525 21647 21921 22040 21539 21838 21785 22096 21942 22217 21504 22208 21303 22428 21300 21963 21353 22441 21441 22016 21424 22343 21602 21937 21798 21991 21698 21917 22030 21771 21815 21613 22264 21396 21813 21140 22616 21208 21767 21131 22712 21139 21887 20999 22692 21047 21741 21201 22691 21392 21516 21537 22137 21844 21719 21410 22600 21466 21498 21395 22272 21768 21261 21730 22235 21872 22055 21857 21959 21736 21881 22082 21778 21899 21495 22165 21644 21767 21493 22221 21617 21666 21731 21794 21696 21736 21735 21959 21925 21576 21894 21687 21970 22064 22127 21609 22129 21491 22436 21331 22056 21473 22347 21314 22117 21243 22480 21379 22157 21219 22536 21337 22032 21209 22460 21480 21947 21296 22401 21432 22001 21392 22355 21596 21930 21575 22228 21680 22025 21767 21949 21701 21908 21941 22089 21623 21851 21760 22016 21840 21824 21866 21895 21590 21863 21861 21880 21671 21858 21952 21818 21719 21927 21943 21819 21660 21685 22092 21712 21607 21704 22048 21818 21519 21720 22109 21880 21584 21632 22060 21879 21564 21718 22030 21945 21600 21748 22247 21748 21505 21568 22219 21847 20721 21996 21763 22130 21350 22301 21203 22237 20951 22651 21157 22248 21156 22226 21881 22089 21519 22376 21420 22214 21159 22669 21214 22248 21203 22640 21892 21701 21851 21745 22208 21737 21801 21932 21940 21849 21884 21870 22010 21856 21991 21979 21820 21898 22208 21833 21972 21860 21736 21991 21808 21841 21808 21945 21990 21696 21927 21515 22293 21551 22025 21756 22072 21809 21804 21970 16273 18864 19652 19986 20480 20160 20405 20504 20438 43321 23792 22118 21687 21605 21700 21977 21817 21685 21762 22052 21893 21640 21661 21994 21926 21472 21 19232 21360 21045 21621 20723 21513 20688 21870 20695 29413 21571 22118 21303 22220 21230 22552 21356 22176 21169 22503 21373 22220 21305 22528 21384 22017 12328 21991 20871 21607 20874 22059 21137 21568 21239 21783 23911 21886 21738 22188 21767 21975 21851 21962 21753 21868 21932 21828 21826 21647 22436 21313 21852 19175 22152 20820 21555 20957 22406 21129 21735 20982 43235 21730 22067 21086 22812 21177 21933 21088 22597 21288 22119 21360 22436 21367 22032 21427 22528 21280 21377 20910 22247 21443 21984 21324 22234 21415 21888 25672 22360 21785 22045 21810 22357 21643 22052 21612 22178 21547 22020 21520 22328 21452 22189 21472 22398 21412 22045 21481 22326 21456 22049 21865 22101 21655 21991 21568 21827 22006 21881 21472 21767 21974 21733 21622 21704 22003 21847 21623 21897 21816 22023 21714 22008 21733 22028 21649 21514 21706 22137 21408 21984 21200 22508 21248 22095 21200 22496 21231 22049 21187 22505 21330 22146 21223 22450 21352 22167 21385 22600 21320 22235 21337 22390 21284 22243 21249 22388 21603 22048 21427 21868 21961 21853 21641 21657 21961 21836 21510 21789 21880 21786 21536 21810 21919 21840 21568 21765 21988 21895 21612 21664 22087 21714 21617 21252 22480 21245 21640 21223 22491 21493 21519 21519 22249 21831 21532 21602 22260 21654 21586 21197 22704 21276 21591 21132 22677 21084 21945 20992 22803 21104 21952 21203 22604 21111 22177 21332 22266 21433 22058 21387 22461 21405 21953 21527 22226 21506 22023 21807 21985 21775 21962 21609 21728 22072 21760 21732 21560 22085 21713 21710 21714 22134 21683 21704 21768 22060 21805 21740 21945 22020 21821 21792 22394 21711 22117 21646 21616 21700 22167 21637 22167 21703 22067 21579 21675 21472 22304 21609 21918 21584 22238 21671 21962 21538 22184 21623 21645 21660 22075 21624 21808 21676 21969 21649 22081 21844 22003 21692 21927 22033 22119 21771 22139 21738 22165 21526 21869 21712 22153 21592 21904 21786 22127 21553 21957 21591 22282 21586 21944 21389 22265 21584 21943 21595 22181 21551 21976 21525 22309 21337 21994 21153 22438 21406 21991 21289 22366 21533 21959 21254 22366 21332 21895 21024 22710 21319 21699 21496 22329 21574 21854 21988 21700 21986 22105 21698 22007 21911 21612 22185 21593 22046 21674 22384 21414 22057 21622 21848 21984 21827 21456 22038 21856 22094 21623 21930 21686 22074 21584 22296 21511 22034 21366 22366 21480 21937 21333 22424 21443 21894 21383 22272 21608 21891 21440 22361 21292 21981 21239 22327 21562 21884 21365 22429 21474 21975 21313 22437 21325 21998 21270 22369 21312 22109 21209 22474 21300 22055 21152 22417 21320 22218 21317 22347 21352 22232 21299 22404 21259 22097 21464 22390 21426 22101 21281 22528 21389 22210 21585 22350 21417 22129 21095 22272 21617 22144 21592 21974 21800 21925 21554 21725 21804 21879 21537 21815 21955 21991 21516 21813 21836 22007 21607 21545 22029 21831 21560 21560 22036 21782 21600 21670 22041 21751 21675 69 18342 19744 20227 20555 20871 20540 20439 20520 21034 26267 22634 21491 21922 21773 32 20615 21528 20965 21550 20942 21654 21221 21459 20941 27416 23287 21341 21824 21047 22968 19538 21317 20497 22535 20664 21663 20721 22484 20843 32724 21602 22796 21759 21993 21876 19635 21301 21543 21600 21600 21877 21633 21627 21493 21969 22531 22077 21762 22302 21694 18597 21014 22278 21248 21867 21200 22226 21309 22035 21577 22930 22027 22164 21543 21709 22095 21865 21636 21660 22115 21657 21633 21822 22023 21821 21769 22155 21761 22133 21659 21364 21553 22217 21543 21888 21380 22348 21403 22055 21211 22456 21336 22133 21175 22440 21342 22062 21432 22220 21579 22020 21902 21881 21791 21921 21549 21817 21922 21833 21472 21816 21889 21943 21680 21812 21968 21965 21792 22136 21760 22038 21688 21931 21692 22102 21655 21847 21432 22280 21472 22080 21139 22328 21343 22099 21168 22502 21403 22106 21207 22423 21526 22042 21690 21745 22213 21429 21791 20981 22568 21120 21841 21066 22746 21141 21976 21348 22460 21395 21664 21481 21848 21956 21941 21532 21970 21874 21874 21717 21648 21864 22080 21816 21977 
35232 38079 36682 36844 38214 43182 34365 41287 41216 39201 42512 37225 35844 37209 35479 32759 35152 42091 38570 36312 34388 38912 33858 38400 40304 41767 38839 40032 40592 37388 36429 37395 41152 35904 39237 41446 33264 35821 34732 40007 33065 36533 33989 34885 35315 35809 34359 39264 34480 35419 41993 33802 37677 37712 39977 39971 34726 37856 40905 37660 39713 42299 41763 36788 36056 38306 35182 33931 42263 43474 38272 40256 41836 41996 34531 43180 40868 37801 36711 42860 33400 34918 33755 38521 37269 32886 33804 42848 36907 34355 42545 40198 35034 38969 39812 38435 39177 43083 42304 36965 36770 38641 41680 40902 39728 35808 42530 41172 38586 37835 39027 40472 38708 34944 36080 36528 35936 38634 35219 38993 33406 40034 33177 41372 41804 38854 41616 42661 41928 39540 40134 44122 41506 39356 39233 43344 42275 38018 42054 41485 34167 37607 42611 43379 42765 38566 41704 42327 42965 37536 34095 41206 34773 37232 43106 42473 42916 38166 41336 42951 42933 39080 34312 38384 35072 37962 36548 38997 34432 37322 36864 37841 34404 38624 34368 39450 35735 42179 35746 38691 34724 37541 37472 35660 27824 40038 33562 32032 35576 37257 32209 42441 35316 41315 38325 35485 39425 43972 34415 40380 34296 42752 34624 40557 40980 42048 34658 40380 40631 35015 39464 41077 37946 38516 37704 37136 37893 36512 39448 35530 40651 36540 39157 37305 38928 34246 41952 34106 37058 42447 38256 42053 43346 40670 39413 34673 40903 33842 39510 43158 41552 33138 37586 42113 42210 33450 37727 41331 42572 42202 37832 41959 41337 43130 39270 39597 43568 42688 37656 32810 40378 35604 39506 35625 39049 35131 38152 37463 35867 35632 33223 38169 36816 42797 38086 36072 39800 33926 42498 40821 40592 41589 43531 41065 39397 41274 42147 34723 38096 35972 37736 35149 36466 37741 37975 41848 39512 37035 39649 39097 42763 40980 39541 40783 43709 41223 38620 42944 41101 35383 36808 38121 36313 34375 34891 38432 37239 43197 36582 37136 39846 42518 41100 41984 39579 40519 42561 42884 37315 35408 41300 34676 36256 38400 35152 34912 42888 42176 36483 38728 41263 39312 40780 35613 36934 40873 38536 37238 41196 37384 37850 35879 41451 33204 37575 34600 41303 39656 37792 37661 39013 38805 34966 34216 34535 43433 39505 38816 40493 41500 35772 38107 37895 34597 35957 18042 31954 40883 34340 37401 35526 38168 37383 40434 39448 38121 36247 33930 34567 34368 38317 39768 35543 41205 42282 37954 43122 40643 35729 39497 38018 37360 35847 35298 37382 37703 33952 40357 41824 40928 39241 43648 43311 41716 35563 36880 33293 34960 36604 39914 42240 41597 42760 40331 40512 42585 34055 37516 36910 36635 32565 35876 36928 39769 42548 42320 41786 39424 39724 33560 42016 39381 35628 37547 34048 35576 38682 36385 42832 39440 33649 39610 40052 43385 33351 36588 35497 37911 36205 36015 40410 36815 33784 38565 33721 39504 40536 42979 41510 37420 33921 37184 36385 40369 34931 42320 42919 39643 41773 40290 35424 35769 33497 41888 44288 40136 35584 41890 40660 40101 39476 37920 37269 37111 42807 37978 38762 38226 36328 42791 42805 34485 42007 35367 36275 34472 38812 41580 43595 43249 35657 38471 35868 35570 32937 38055 38115 32874 41625 43056 36749 35479 38187 35735 34037 39154 37136 40357 43233 41272 38425 42565 40480 35298 34928 39258 37128 38130 40135 42288 40745 40388 43521 34053 38861 36704 36284 42295 39682 42865 40072 40439 43068 43008 37800 42592 39801 35740 35328 39120 36601 42696 41971 40600 40680 39897 42890 34152 33524 42873 40289 39971 42255 40708 38182 37456 44482 37817 40022 38402 38041 36327 35866 38099 39074 33928 43096 41443 38842 43050 40448 36829 35584 39044 36084 32808 37975 34401 39370 39640 41858 35589 34659 40506 36576 43047 41840 40152 37865 40696 39386 38072 40477 35754 39131 42631 39725 40635 40876 36160 33735 35996 33585 34541 38263 34985 40508 38617 39563 40780 36360 36953 38496 38176 43175 36504 42837 42769 42752 39327 41397 41143 35954 37424 40845 34407 35031 35749 33754 38646 43056 42048 41665 38448 33536 38903 36983 35366 38561 35799 37538 41984 41840 38960 40482 42540 35602 37809 39986 35548 33280 37415 33456 40790 39815 43035 34752 37425 38180 36820 32704 40739 40627 39835 41025 41376 35719 36215 38440 38065 36576 42594 42304 41232 38818 43447 34203 37226 38470 35896 42308 41152 41388 38528 41076 42368 33287 34988 36484 37976 41783 40051 42381 41072 39160 41216 35384 36151 39158 37420 35136 41061 41872 38856 34576 40406 36557 34642 38040 37363 41583 42291 42154 38460 41926 38917 36304 42761 40567 35767 35766 43780 39520 37980 34363 33761 38177 39525 40448 41000 41472 38464 39236 36225 39672 40602 37332 41762 36039 34820 32388 34208 40039 42400 41656 36266 41165 40165 40579 40220 42038 40704 37003 35996 41152 33127 37246 35002 37496 37319 42322 40807 37867 36183 40771 41877 37292 35254 38579 36864 34541 38412 37251 34501 42053 42051 38925 41558 41701 36164 38507 39704 37511 32932 42013 41301 39159 42026 39943 35591 36279 38573 35524 41643 40150 42887 40284 40354 41991 35676 36728 37175 35752 33760 38134 35802 41195 39847 43954 33024 34304 37009 35472 34122 38072 42388 41616 39459 42304 35168 36423 38201 36224 33632 37132 34540 40976 40227 43579 43320 38932 35969 37479 35266 36452 40042 35809 32969 39508 43234 39799 41045 43341 43146 38452 38486 36868 35830 34956 40177 35923 33323 35059 38347 40093 39319 37304 38133 37163 42642 37584 39136 37926 35604 40471 34362 37416 35618 40819 40679 36676 36698 36632 40096 40229 37163 36032 42072 39480 37831 37960 42752 36179 36515 39064 34540 35256 33800 39147 35760 35576 37673 35072 38228 43048 41728 42832 36967 33628 38583 35328 38640 38757 35248 36025 35084 37843 39181 36980 37605 35396 40184 42720 42351 42087 39234 39952 42631 33434 37928 36298 39542 35462 37312 38128 36504 33124 37776 35786 40192 35175 41475 40432 36437 40944 40059 34479 37217 35244 35688 36569 36151 38401 38228 37538 42740 42042 39337 41642 42863 35981 37269 35852 36741 34545 35770 36913 39800 41657 42293 41260 39972 40280 42093 35252 38608 37792 36210 34214 34758 37888 37206 33433 41562 41820 38304 41328 41465 34240 36838 38660 35131 33340 35501 41075 36016 35609 42528 39351 40738 36121 35648 41101 35876 33616 35599 35280 35433 42724 40580 37334 37965 35848 41184 43072 37655 33932 40176 37536 37052 38992 34976 33901 36582 39328 40755 42221 33508 37228 33280 38976 36651 36966 40712 34229 36321 32977 39313 38424 35015 40796 42136 37835 41776 38912 35000 39206 38888 38059 37208 34416 39188 35032 33783 35413 37040 38267 33096 39462 33210 39640 40970 33411 41460 38340 40088 43387 34211 38080 34831 38707 34930 37584 38128 35689 33121 35584 37510 38580 33757 38819 33760 40740 43304 43040 40915 40034 39194 44003 42086 39196 40721 41808 42130 38433 33456 40172 37035 39167 37859 35977 33032 34504 37400 38727 33339 36608 36059 39241 37882 40846 32786 40308 41175 43125 41060 38381 41569 43312 42552 38579 42053 42394 34224 37605 36216 38517 35108 37583 38806 36033 36480 34336 41168 41936 36642 39108 34604 39814 36043 39154 35706 39138 37623 37771 35361 38260 35904 39794 35545 41490 33192 32917 39856 36775 35484 41784 34520 42474 43325 42112 41280 35898 40493 35592 41094 37108 39075 36928 38151 35611 37216 39203 35956 37364 43123 40496 34656 35798 42906 41248 34396 34548 35456 35981 34887 35473 35644 38089 37692 33676 37084 35155 37984 38897 40151 34350 39692 43079 43213 41521 39136 42744 42471 41173 39959 40704 43493 41945 40464 40311 33600 41128 38720 40121 43488 43043 38323 40679 42672 42464 38753 41656 42438 34263 37607 33809 40721 34917 38568 35959 38033 35242 37280 37851 39469 34567 36891 35506 38261 36584 36333 37008 37361 33921 36988 36987 37159 34931 36775 37751 36504 35494 37705 37992 36628 34691 34912 39354 35256 34165 34999 38640 36522 33160 35171 39625 37238 33678 33955 38945 37383 33656 35235 38716 37977 33928 35553 41222 35891 32656 33184 40772 37042 34828 38388 35845 39733 41612 41876 40213 41331 37560 35165 39372 41208 39531 40912 37463 39424 33304 42144 42427 41009 39766 35344 40147 41248 40194 34858 37072 35179 36887 35660 40458 35823 36217 37688 37796 36870 37300 37195 38707 36804 38512 38438 36595 37264 40464 36773 38128 36928 35601 38435 36226 36608 36167 37870 38489 34996 37687 33038 41295 33823 38501 35984 39104 36352 36303 37909 39468 35397 33703 37160 31600 38943 42027 32272 41995 41738 37397 39766 35252 34080 34961 38184 36521 35012 35544 38801 37328 34326 34690 38376 37692 42563 18244 38276 41402 38400 34400 34704 32788 33990 37059 34551 45625 34087 39622 41141 41049 40592 33827 41384 40344 39667 43993 42211 41107 41191 33412 41408 38640 27304 38106 36429 34203 36170 39121 39179 33544 40323 36276 38682 37514 35685 40455 36056 38295 37001 38087 35937 37064 37736 36512 36417 34695 42768 41188 37083 39004 40044 35819 33431 37291 42615 39356 35849 37586 40691 35622 39104 38888 36805 39680 37992 38553 34386 40529 40032 41559 43126 42083 38756 42304 33465 40274 41664 37080 41269 42572 38418 41227 41216 42384 37226 36320 42121 36292 38963 36352 42200 34816 38775 34317 40103 33623 38320 32877 41600 42724 40885 42720 43097 42250 39238 42956 42144 42612 39083 37131 39559 34852 38432 33509 36378 38616 37313 42532 36138 38196 35680 34287 35025 38507 36974 34453 37196 36359 38680 35321 38523 35668 38634 34504 32897 35024 39948 41912 38411 39792 44000 40357 39846 39864 43638 40817 39016 39857 43962 41440 40067 40457 43248 41708 40536 41915 34502 40896 41317 41545 42836 40873 41304 40380 42663 34396 38596 42296 37301 38123 37040 34456 34519 37975 36697 32840 36002 37120 36043 32992 36060 37747 36549 33429 35610 38264 37390 34259 34397 39364 35346 34135 40023 43466 40888 34536 40168 43911 43310 33528 32971 41047 36832 33187 33753 41116 34765 33671 39824 35543 40502 34216 38992 35332 38597 38005 37402 36603 38704 37860 40050 34564 39008 40354 41320 41604 42537 39296 41952 43683 42421 38124 33252 40631 32880 38498 36562 38248 36184 38025 34245 35222 39061 35613 35469 33394 39184 35364 35340 35200 39859 35127 35063 35652 39009 36504 35693 37879 38494 36705 35932 42546 35756 39721 34708 34073 34924 40244 34519 40185 35432 39098 33949 34923 42368 41675 34389 37559 33648 41032 35089 38012 33152 40194 34592 34569 34591 39278 34381 36112 34838 38000 34480 39120 36754 38599 35190 37703 38665 39960 36082 40067 35803 40169 33224 37061 35143 39991 33997 37067 36053 40041 33506 37880 34055 41184 33945 37682 41880 41664 33868 37843 34112 40285 33772 38040 33111 41474 41523 38688 39372 43143 42360 38788 40834 42627 33567 37999 40328 42608 41402 37570 37775 35707 41088 35360 42791 42224 33926 36820 38280 35168 38180 39587 35140 38691 37616 34263 40305 34160 38858 34940 42224 42324 39288 34476 36608 38181 36583 42356 39008 36864 39547 34578 37584 35064 39145 33753 41248 33184 38464 41728 42662 43023 37992 41317 42987 42649 37508 41786 41243 34264 37104 42101 42542 41059 38627 40585 42165 33812 37174 41640 43281 42932 38624 40977 43227 41563 38840 40583 42451 41062 39964 40194 43586 41092 39303 39284 42792 41281 41014 41290 42390 41665 41126 41075 42710 40738 39581 42678 42885 42421 39809 40704 33388 41660 40808 33952 42053 42374 40037 39138 41079 34416 39606 34016 38069 36208 37612 33399 35444 36237 37264 33171 36336 37971 38572 33045 36227 36650 38707 34328 33211 38619 36757 33463 33280 38513 36049 33837 34648 38744 36008 34948 18527 39149 34718 39821 33028 36185 32566 42135 32496 37997 42948 35085 42848 37736 36057 17888 32640 32744 37259 33513 37095 34580 40097 42691 37554 44729 42499 41716 36555 38317 38341 32679 40858 32141 33332 33809 34772 34614 43305 36457 50560 34642 36391 36138 38444 37156 33680 40741 33591 33715 33682 37064 34218 34398 42800 38368 33463 39248 35719 41625 35433 32461 37600 41311 40225 37312 39753 40944 41298 38938 33840 37763 38792 40168 33575 35242 39601 37146 34284 34566 39608 34774 34132 36512 38656 36712 35824 40119 35761 39925 34891 41576 33565 40691 33568 36864 41505 42346 42275 39355 40271 43333 41516 40177 39912 43106 41760 39407 42336 41088 34087 38312 37473 37268 36353 37472 33543 36299 37476 36656 42496 36594 37097 37965 34818 36224 37933 38282 35997 39824 35653 38740 35046 37737 35144 39481 34819 36816 42155 41464 42728 39362 39315 41926 41813 39752 39528 43863 42377 39863 40280 43082 33417 38657 35136 35569 40727 42409 36587 37632 33898 38628 36730 38428 36160 39216 38279 41422 43524 42155 34773 42731 36968 37943 37891 33233 37888 37112 37033 35410 34240 36822 39080 36424 38248 
24044 23894 23952 23239 23737 23815 23784 23291 23243 23644 24104 23854 23783 23203 23871 23481 23850 23261 23593 24060 24032 23280 23591 23552 23870 23479 23527 23605 24343 23623 23655 23205 23888 23406 23768 23236 24231 23840 23879 23104 24029 23312 23780 22952 23716 23704 24076 23182 23824 23574 23917 23331 23575 23446 24317 23489 23590 23309 23977 23253 23678 23132 23973 23813 24165 23319 23861 23482 23714 23319 23495 23636 24466 23366 23533 23261 23880 23222 23606 22993 23732 23776 23846 23175 23732 23409 23811 23121 23506 23688 24330 23374 23545 23596 23930 23257 23530 23134 24074 23868 23463 23123 23915 23574 23357 22720 24140 24284 23389 22872 23964 23729 23543 22702 24119 24588 23767 22864 23673 23829 23475 22928 23001 24019 24539 23401 23053 23689 23796 23286 22896 23641 24592 24119 23189 23753 23642 23570 23086 23528 23897 23990 23352 23490 23672 23467 23139 23394 23851 23540 23740 23468 23964 23533 23781 23441 24099 23413 23848 23344 24093 23526 23794 23680 23763 23527 23745 23702 23768 23484 23675 23712 23850 23532 23697 23640 23789 23545 23687 23671 23697 23456 23542 50 43 5785 8828 11010 12175 12306 13306 13450 14314 43690 30918 28096 27500 26186 26536 25296 25891 24965 25792 24653 25508 24536 25623 24288 25147 24030 25520 23684 24723 23586 25392 23924 24353 24002 25088 24002 24128 23900 25056 23624 24059 23856 24327 24277 23835 24849 23651 24443 23453 24662 23734 24262 23498 24450 23623 24192 23553 24408 23495 24043 23467 24293 23527 24071 23301 24360 23488 24058 23265 24402 23372 23952 23413 24279 23591 23886 23641 23961 23697 23929 23748 23861 23588 23659 23920 23684 23399 23655 23735 23914 23942 24141 23316 24044 23160 24437 23143 24041 22965 24313 23321 23720 23430 23921 23562 23869 23721 23613 23377 23552 23588 23895 23175 23911 23296 24011 23065 24156 23096 23745 23063 24118 23286 24168 23607 23645 23422 23442 23699 23606 23271 23580 23528 23712 23254 23811 23212 23730 23145 23992 23088 23629 23151 23920 23453 23509 23360 23646 23449 23186 23748 23341 23242 23460 23591 23783 22908 24503 22692 23607 23012 23862 23638 23074 24354 22867 23287 22887 23832 23599 22958 24172 22651 23687 22667 24391 22816 23255 23367 23383 23668 22750 24312 22784 23371 23229 23472 23385 23326 23686 23279 1345 10168 12755 14680 15050 16155 15844 16248 16352 16139 31396 26881 26163 25339 24747 24971 24393 24679 23876 24806 23992 24290 24020 24272 23910 24013 24131 23951 23582 23959 23836 24122 23517 24457 23251 23963 23299 24177 23521 23696 23847 23810 23354 24016 23358 23957 23350 24170 23176 23741 23377 23832 23428 23585 23738 23644 23234 23874 23127 23885 23052 24169 23008 23660 23063 23951 23377 23624 23624 23484 23196 23488 23560 23711 23088 24016 23050 23712 23061 23842 23463 23492 23639 23333 23369 23253 23520 23632 23345 23899 22962 23624 22970 23912 23368 23442 23655 23099 23364 22913 23963 23609 23067 24320 22620 23397 23252 23316 23617 22678 24289 23020 23058 23776 22880 23568 22708 24337 22996 22983 23888 22752 23351 22960 23432 23723 22656 23985 23316 23466 23829 22902 23411 22941 23693 23397 23245 23559 23200 23178 23552 22946 23485 22895 23655 23301 23388 23524 23216 23052 23274 23133 23623 22664 23800 22999 23931 23352 23268 23045 23269 23142 23586 22895 23911 22777 23461 22876 23620 23073 23368 23381 23460 23086 23860 22779 23513 22763 23691 23020 23458 23311 23334 22990 23269 23196 23549 22856 23898 22730 23447 43 15687 17100 17596 18237 18304 17968 18991 18025 18916 28873 25808 24533 24289 24322 24039 23684 24044 23695 24050 23200 24330 23405 23771 23644 23546 23434 23397 23680 23894 22947 24032 23148 23624 23407 23376 23205 23197 23572 23572 22647 24239 22931 23473 23663 22693 23445 22615 24022 23474 22998 24245 22548 23352 23367 23144 23578 22599 24055 22977 23006 23782 22861 23592 22418 24171 22769 23045 23420 22940 23416 22750 23735 22834 23239 23190 23202 23186 22960 23397 23207 23067 23680 22820 23402 22618 23776 23061 23753 23254 23175 22976 23178 23126 23445 22692 23764 22725 23437 22947 23269 23151 22988 23346 23363 22735 23760 22663 23395 22919 23292 23001 23111 23181 23515 22699 23863 22712 23298 23089 23156 22959 23056 23120 23476 22753 23787 22606 23474 22823 23403 23029 22980 23134 23488 22688 23800 22780 23273 22870 23523 23035 23309 23193 23424 22842 23781 22607 23316 23032 23216 23018 23014 23127 23351 22717 23726 22934 22915 23152 23040 22984 23190 23002 23424 22648 23663 22803 22675 23281 23045 23000 22822 23200 23527 22536 24138 22830 22984 23874 22530 22813 23575 22409 23532 22361 23629 23288 22789 24008 22736 23015 17412 18236 19451 19170 19787 20094 19325 20676 19729 44168 25824 23842 23802 23630 23639 23920 23150 24002 23301 23236 23632 23235 23268 23420 23219 23636 22873 23853 23198 23402 23411 23218 23131 23284 23296 23603 22767 23827 22887 23360 23178 23357 23191 23153 23210 23559 22752 23873 22919 23488 23276 23236 23027 23161 23334 23498 23032 23907 22685 23429 22998 23293 22996 22913 23352 23339 22792 23584 22604 23422 22715 23438 23031 23087 23301 23286 22793 23705 22627 23323 22946 23264 23014 23113 23289 23281 23064 23608 22629 23407 22755 23552 23012 23220 23334 22986 22937 22927 23275 23424 22869 23680 22746 23298 22779 23487 23060 23093 23367 23055 22908 23155 23441 23210 23028 23640 22586 23377 22272 23889 22936 23091 23655 22528 23161 22659 23636 23357 22865 23925 22491 23507 22257 24166 22693 23381 23413 23125 23336 22489 23989 22579 22940 23123 23148 23124 22889 23409 23079 22960 23072 23228 23247 22966 23473 22774 23160 22713 23560 22983 23508 23146 23203 23079 22932 23319 23108 22808 23342 22843 23233 23072 23597 22598 23375 22596 23702 22736 23238 22779 23502 22935 23207 23146 23197 22959 23061 23324 23297 22824 23639 14906 21171 20604 21946 21072 21539 21448 21486 21355 21512 24824 23837 23127 23528 23193 23735 22767 23872 22952 23414 23176 23596 23141 23341 23464 23399 22816 23488 22931 23622 22675 23885 22828 23383 23086 23369 23096 23171 23431 23168 22918 23383 23080 23463 22671 23723 22811 23157 22976 23328 23161 22919 23448 23206 22931 23128 23197 23457 22577 24114 22387 23213 23102 23632 23013 22892 23859 23048 23375 22612 24068 22619 22983 22789 23610 23221 23005 23957 22457 23405 22298 23964 23051 23121 23661 22548 23273 22612 23697 22853 23216 23283 23141 23175 22880 23512 23013 23047 23218 22926 23356 22792 23727 22852 23236 22995 23410 23095 23148 23389 23095 22925 22886 23424 23243 22870 23329 23008 23355 22912 23945 22657 23328 22539 23666 22704 23337 22791 23484 22965 23305 23138 23184 22936 23040 23261 23324 22920 23272 23035 23492 22764 23723 22644 23454 22560 23905 22644 23397 22553 23766 22740 23271 23043 23609 22954 23328 23097 23232 22909 23015 23250 23122 22853 23206 23050 23361 22866 23518 22848 23431 22889 23708 22688 23402 22616 23735 22887 23177 22644 23687 22935 23143 22944 23447 23130 23299 23255 23207 23117 23009 23436 22999 23144 22651 23798 22765 23051 22548 23993 22710 23070 22532 23880 22554 23181 22516 24046 22722 23215 22825 23662 23234 23126 23493 23174 23325 22932 23053 23569 23209 22938 23380 23145 23419 23047 23306 23175 23168 23237 23260 23220 23068 23001 23444 22976 23111 22832 23468 23079 22969 23025 23416 23184 22912 23212 23272 23184 22944 23278 23125 23319 22912 23639 22967 23534 22848 23680 22690 23474 22541 23714 22693 23452 22707 23729 22757 23415 22607 23812 22772 23397 22673 23709 22807 23336 22836 23606 23079 23323 22695 23676 22919 23321 22932 23513 23025 23293 23111 23353 22999 23399 23215 23192 23015 23220 23197 23283 23110 23283 23392 23142 23031 23197 23224 23349 23021 23166 23197 23325 23047 23116 23280 23232 23019 23104 23393 23094 22900 22997 23300 23164 22879 23165 23257 23207 22855 23226 23406 23141 22900 23090 23257 23300 22930 23333 23193 23304 22950 23216 23324 23315 22656 23317 23040 23424 23008 23840 22550 23584 22677 24134 22455 23428 22471 24153 22495 23595 22871 23661 22728 23575 22705 23978 22444 23483 22582 24166 22374 23452 22808 23533 23439 23181 23062 23096 23350 23130 23224 23311 23201 23233 23124 23323 23106 23215 23057 23308 23291 23221 23186 23280 23169 23217 23092 23345 23171 23057 23189 23168 23328 23054 23277 23052 23387 23160 23299 23194 23235 23109 111 1859 4696 6990 8960 9813 9974 10161 10403 10860 42297 32453 28764 27431 26548 25924 25487 25617 25244 24991 24932 25173 24963 24540 24884 24631 25016 51 10478 12768 14577 13941 15309 14440 15425 14577 15959 35564 29930 26824 27212 25511 26052 24889 26009 24623 25435 24416 25494 24304 24968 24124 25232 24185 12215 16067 17607 16992 17816 17457 18302 17883 17779 43641 29386 26749 26009 25600 25448 25039 24851 24976 24608 24659 24431 24777 24333 24448 23886 25111 23898 18415 18736 20435 19393 20106 19367 20980 19528 20336 30034 26923 24713 25020 24023 25408 23959 24325 23788 25147 23820 24375 23830 24989 23599 24387 23482 16711 20680 21847 21261 22309 21512 22107 21447 22454 21594 25788 24381 24669 23955 24284 23821 24485 23735 24197 23636 24427 23584 24133 23539 24467 23447 24135 23415 24405 23409 24100 23366 24309 23656 24173 23524 24117 23712 24113 23465 23886 23715 23978 23517 23808 23860 23786 23560 23670 23930 23736 23557 23687 23774 23834 23589 23815 23665 23911 23545 23959 23420 24180 23387 23901 23138 24222 23246 23930 23136 24248 23179 23824 23119 24316 23212 23771 23104 24285 23296 24087 23056 24285 23220 23956 23111 24298 23152 24079 23168 24042 23591 23888 23346 23762 23696 23740 23378 23616 23624 23801 23411 23934 23740 23755 23438 23740 23700 23732 23355 23628 23671 23765 23331 23533 23748 23655 23349 23280 24057 23478 23311 23429 23958 23527 23179 23760 23468 23736 23801 23706 23813 23380 23336 23280 24128 23243 23449 23018 24392 22903 23535 22897 24411 22966 23706 22870 24454 22862 23658 23063 24025 23111 23772 22951 24010 23200 23750 23165 23933 23265 23757 23251 23772 23539 23647 23319 23538 23607 23359 23445 23329 23732 23415 23420 23291 23731 23412 23466 23336 23637 23581 23426 23425 23624 23605 23394 23667 23454 23744 23354 23789 23425 23654 23340 23814 23419 23675 23269 23691 23226 23888 23339 24164 23375 23706 23347 24074 23421 23554 23314 23650 23466 23674 23364 23632 23561 23620 23312 23502 23498 23489 23348 23639 23450 23417 23313 23729 23400 23656 23307 23652 23413 23626 23345 23589 23277 23758 23377 23633 23228 23746 23266 23575 23296 23631 23370 22901 23238 23767 23246 23552 23085 23999 23088 23599 23065 23943 23184 23543 23153 23896 23150 23513 23137 24282 22993 23424 23081 23980 23383 23593 23558 23591 23524 23187 23976 23194 23574 23432 23900 23051 23733 23121 24073 23160 23655 22973 24126 22826 23663 23146 23850 23479 23628 23267 24020 22964 23623 23273 23787 23195 23736 23031 23842 23125 23600 22973 23912 23090 23579 22983 23893 23285 23420 23345 23746 23204 23463 22958 23989 23078 23558 23161 23783 23188 23512 23090 23993 23030 23556 23008 24018 23047 23536 22919 24055 22912 23533 23199 24049 22907 23663 22775 23971 22973 23802 22857 24073 22890 23685 22898 24048 22858 23753 22995 24025 22865 23732 22853 24177 23053 23975 22989 23932 23015 23767 23082 23820 23256 23716 22605 23815 23399 23542 23041 23605 23396 23569 23052 23622 23360 23680 23057 23565 23520 23512 23130 23271 23568 23415 23080 23533 23507 23425 23190 23313 23642 23266 51 2220 6328 8116 9389 9524 10258 10282 10375 43597 36711 30538 28049 26871 26933 3508 13285 14327 15724 14876 15774 15452 16513 15669 16224 34496 29257 28335 26597 26511 1330 18119 17004 18334 17632 19368 17786 18999 17879 19634 31016 28269 26264 26563 25895 25677 19343 20358 20261 20570 20525 20702 20677 20656 21016 29971 26729 25792 25493 25147 25385 21357 22318 21961 22848 22058 22503 21907 22861 21807 22622 25069 25245 24518 24836 24264 24541 24469 24544 24135 24304 24489 24246 24069 24153 24343 24311 24000 24400 24188 24260 24011 23929 23957 24397 23799 24165 23651 24505 23645 24192 23402 24686 23447 24250 23371 24581 23447 24240 23610 24315 23680 24167 23573 24065 23889 23978 23495 23809 23771 23943 23424 23842 24013 23909 23648 23877 23889 23877 23784 24073 23860 24035 23721 24049 23753 24109 23587 23888 23601 24169 23430 23936 23278 24363 23364 23976 23068 24500 23235 24105 23278 24436 23600 23964 23140 23854 24375 23255 23688 23205 24546 23198 23763 23070 24576 23121 23927 23164 24333 23731 23840 23426 24199 23520 23929 23343 24167 23536 23944 23555 23969 23469 23911 23592 
22613 22041 22686 22608 22375 21655 23216 22519 23131 21704 22633 22203 22656 21745 22247 22105 23185 22362 22419 21909 23135 22171 22448 21529 22931 22505 22840 21852 22831 22349 22825 21900 22128 22680 23489 21760 21952 22242 22730 21788 21612 22071 23681 22743 21821 21791 23111 21919 22031 21459 23228 23348 22416 21255 22304 22381 22235 21312 21872 22896 23586 22163 21727 22500 22413 22278 21848 22512 22667 22910 22287 22290 22568 22565 22196 21941 22045 22716 22690 22423 21911 22565 22444 22597 21678 22415 22384 22885 21906 22434 22305 22522 22252 22229 21940 23007 22375 22351 21901 22681 21904 22500 21656 22933 22656 22478 21689 22805 21836 22571 21734 23047 22408 22798 21752 22903 21819 22417 21541 22636 22359 23121 21665 22416 21984 22920 21661 22304 22419 23316 21881 22336 22177 22784 22016 22294 22020 23176 22261 22459 21669 22913 21680 22521 21630 23328 22234 22384 21782 22734 21752 22451 22016 23190 22189 22409 22032 22851 21959 22189 21694 23000 22295 22483 21855 22667 21911 22266 21719 23123 22816 22851 21512 22862 22277 22314 21210 22921 23097 22542 21056 22743 22013 22176 21125 22816 88 89 69 94 86 84 104 43602 43651 37408 31640 29747 27272 26348 25657 25767 24526 24605 24080 24489 23432 23766 23284 23955 22802 23383 22891 23213 22662 22837 22890 22850 22510 22581 22777 22745 22269 22683 22669 22711 22080 22535 22329 22844 21974 22883 22204 22998 21856 22625 22237 22819 22299 22907 21811 23057 21600 23144 21657 22875 21894 22887 21882 22871 21692 22822 22019 22704 21799 23059 21625 22693 21478 23114 21667 22533 21632 22991 21782 22551 21888 22746 21966 22368 22555 22041 22223 21659 22976 21749 21760 21968 22227 22571 22192 22615 21629 22749 21319 23579 21148 22484 21177 23372 21728 21600 22293 21936 22386 21465 23029 21545 22057 21848 22610 22181 21911 22272 22211 22167 21801 22697 22144 22055 22173 22071 22397 22059 22762 21795 22347 21648 22859 21800 22322 21803 22628 22215 22181 22418 22145 22016 22097 22310 22208 21903 22368 21864 22709 21565 22967 21573 22570 21585 22731 21977 22297 22256 22304 21728 22286 22070 22637 21627 22949 21583 22581 21509 22995 21766 21880 22020 22342 21906 22389 22232 22433 21701 22582 21889 22773 21639 22983 21641 22616 21549 22874 21916 22503 129 103 95 105 411 4967 5606 8776 9019 43609 43654 43666 36104 31344 28868 27352 25827 25837 24583 25053 23558 24896 23363 23969 23181 24110 23156 23525 23525 23128 22951 22489 23501 23239 22446 23880 21723 23029 21774 23424 22828 22189 23625 22144 22359 22761 23322 22786 22110 23912 21610 22783 21985 23040 22701 22100 23458 21960 22438 21754 23069 22515 22532 22903 22263 22366 22120 22565 22765 22237 22976 22139 22653 21892 22878 22352 22020 22637 22295 22347 22090 22592 22599 22732 22714 21992 22702 21666 23005 22149 22475 22392 22425 22174 22320 22533 22688 22072 23054 21873 22779 21643 23032 22145 22611 22325 22426 21922 22704 21925 22731 21683 23107 21824 22631 22209 22568 22028 22390 22279 22776 22333 23028 21679 22532 21879 22935 22034 22168 22473 22645 21924 23181 21504 23011 21395 23056 21881 22599 22406 22550 21772 22886 21723 22718 21942 23057 21968 22631 22308 22375 22016 22505 21888 22727 21657 23127 21904 22258 22254 22464 22016 22038 22708 22434 21682 23216 21316 22599 21811 22692 22519 21557 22997 22550 21572 23040 21394 22688 21256 23674 21527 22101 22502 21863 22177 21587 22739 22467 21625 23350 152 103 3550 8895 12215 12903 15042 14728 15731 16368 43648 37552 30605 28388 26880 25369 25557 24200 24330 23749 24039 23607 23219 23704 23394 22873 23480 22720 23248 22384 23670 22596 22940 22915 22775 22254 22775 21900 22588 21611 22688 22103 22290 22432 22603 22359 22981 21940 22979 21795 23170 22090 22691 22469 22487 21970 22797 21872 23084 21464 23235 21844 22699 22056 22805 21991 22428 22458 22540 21847 22962 22057 22813 21575 23392 21521 22738 21820 22694 21922 22352 22311 22791 21834 22716 21927 22763 21552 23208 21925 22919 22328 22293 21843 22433 22082 22684 21825 23130 21703 22586 21995 22632 22094 22067 22501 22471 21965 23363 21298 22320 22136 22101 22384 21762 22851 22671 21365 23584 21437 22247 22276 21818 22151 21698 22732 22473 21738 23467 21351 22456 21991 22092 22439 21475 22868 22372 22133 22503 21973 22055 22096 22365 22572 21789 22647 22327 22185 22639 22069 22075 22481 21945 22286 21793 22567 22205 22138 22508 22182 21929 22846 21698 22488 21800 22709 22144 22152 22498 22372 21777 22759 21746 22628 21852 22616 22004 22152 22251 22673 21666 23153 21744 22537 21966 22403 21851 22199 22147 22704 21545 23068 123 10760 14280 16077 16559 18050 17657 18957 17846 43619 34550 28748 26178 25011 23970 24145 23215 24167 22422 24160 22486 23575 22828 23066 22405 23121 22400 23260 21886 23504 22258 23142 22641 22535 22136 22779 22288 22989 22081 23296 21840 22624 22260 22666 22116 22439 22467 22835 21544 23730 21721 22016 22654 21976 22518 21640 23128 22464 21644 23664 21107 22413 21733 22201 22348 21454 23147 21712 21809 22926 21344 22485 21537 22529 22464 21553 23146 22165 22059 22667 22048 22052 22429 22163 22528 21985 22854 22124 22000 22581 21943 22056 21944 22542 22480 21980 22609 21851 22432 21735 22837 22103 22510 22546 22181 22077 22239 22300 22486 21889 22984 21639 22581 21575 23008 21784 22440 22162 22368 21976 22099 22227 22568 21940 22997 21610 22699 21560 22984 21814 22582 22037 22646 22031 22262 22244 22568 21769 22529 21879 22745 21571 23092 21664 22520 21832 22605 22002 22451 22127 22357 21815 22331 22113 22699 21459 22949 21671 22767 21472 22995 21708 22461 21870 22657 22025 22230 22341 22332 21712 21981 22183 22449 21736 22593 21918 22784 21523 23035 21548 22678 21258 23469 21635 22472 22261 22155 22336 21572 23185 21984 6719 16109 17878 19927 18725 21434 19545 20504 19938 21456 30619 25643 25001 22968 23083 22688 22951 23236 21988 23669 22457 22491 22377 22607 22776 22239 22951 22231 22391 22333 22518 22551 22098 22696 22119 22344 22352 22361 22505 21775 22922 21706 22252 22100 22634 22138 22240 22524 22246 21813 22479 22115 22521 21456 23002 21504 22444 21809 22761 21914 22549 22438 22349 21771 22240 22157 22567 21852 22552 21824 22767 21654 23050 21522 22679 21412 23184 21777 22884 22025 22528 21904 22294 22409 22576 22263 22976 21706 22702 21522 23137 21517 22636 21763 22695 22144 22544 22248 22335 21959 22429 22055 22720 21589 23117 21623 22588 21713 22841 21929 22336 22111 22481 22037 22330 22327 22226 21799 22260 22324 22581 21747 22960 21633 22791 21376 23344 21277 22576 21227 23427 21707 22333 21860 22315 22295 21909 23053 21584 22200 21637 23016 22006 21846 22221 22476 22353 21604 23092 21389 22807 21202 23504 21208 22365 21689 22605 22267 21987 22261 22266 22493 21907 22761 21920 22400 21678 22709 21914 22108 21952 22660 22128 22206 22203 22272 22290 22113 22538 22141 22080 22031 22497 22128 21980 22097 22276 22304 21832 22572 21967 22564 21893 22561 21879 22633 21764 22880 21618 22769 21549 22992 21559 22960 21831 22853 21752 22717 21560 23003 21534 22546 21328 23054 21561 22540 21363 23249 21492 22627 21380 23184 21583 22580 21548 23061 21693 22419 21705 22881 21653 22439 21717 22774 21723 22496 22018 22690 21929 22433 22167 22497 21973 22354 22272 22057 21825 22071 22203 22272 21824 22183 22408 22442 21880 22338 22249 22531 21731 22669 21815 22644 21785 22540 22124 22564 21779 22904 21747 22915 21496 23287 21258 22736 21253 23484 21254 22663 20993 23466 21211 22735 21069 23515 21107 22474 21158 23468 21335 22192 21489 23168 21703 22236 21814 23136 21444 22259 21537 22401 22221 21975 22140 22408 22193 22077 22244 22361 22290 22064 22252 22237 22120 22120 22162 22191 22366 22055 22731 21738 22530 21784 22831 21643 22493 21797 22881 21544 22560 21767 22897 21557 22603 21570 22949 21611 22475 21604 22940 21568 22514 21396 23021 21596 22477 21498 22984 21672 22419 21568 22785 21899 22931 21941 22689 21892 22639 22049 22992 21682 22580 21927 22924 21716 22670 21883 22749 21943 22358 21802 22962 21672 22598 21428 23121 21664 22520 21533 23143 21525 22553 21526 23078 21552 22572 21544 22928 21556 22503 21455 22990 21590 22492 21703 22797 21894 22442 21753 22829 21630 22519 21465 22992 21504 22477 21518 23016 21788 22446 21440 131 103 98 105 87 828 4210 5657 7904 8748 43600 43672 43585 37134 32073 29777 28128 26819 26025 25825 25409 25137 24379 25068 23648 24186 23291 147 118 153 5767 10156 11949 13040 14683 15220 43559 43751 43685 36757 31624 29161 27708 26489 25946 24995 24970 24853 24343 24273 24033 23889 23786 23756 135 2690 10076 13532 15541 16394 17104 17477 18648 43619 43669 34385 30049 27675 25959 25650 25064 24983 23925 24245 23892 24157 23343 23942 23210 23882 119 6540 12883 16956 17317 19255 18822 20119 19404 20682 43648 33041 27697 26787 24742 25134 23625 24605 23532 24256 22406 23852 23131 23847 22223 23596 22839 8335 15710 19603 19667 20856 20522 21257 20809 21660 20764 31670 26225 25213 23559 24129 23360 23740 22810 23552 22951 23513 23027 23521 22608 23239 22400 23387 22673 23283 22510 23217 22503 22932 22336 22752 22784 22853 22263 22565 22948 22653 22375 22408 23157 22499 22532 22814 22498 22990 22504 23132 22407 23373 22032 22640 21728 23589 21714 22710 21580 23815 21504 23040 21529 23610 21729 23051 21776 23552 21798 23076 21764 23471 21813 22913 22245 22763 22567 22346 22472 22425 22567 22384 22487 22461 22675 22419 22397 22336 22702 22128 22433 22003 22941 22023 22542 21884 22994 21825 22693 21842 23011 21896 22839 21740 23109 21927 22802 21687 23045 21805 22728 21629 23127 21779 22625 21682 23094 21821 22745 21606 23095 21673 22823 21553 23168 21656 22661 21665 23205 21682 22800 21624 23061 21710 22830 21609 23165 21681 22904 21721 23072 21724 22918 22008 22901 21967 22835 21539 22776 21997 22699 21812 22995 21840 23013 21854 22784 22052 22881 21775 22640 22360 22466 21919 22211 22460 22347 22071 22484 22159 22647 22104 22592 22198 22707 22021 22833 21995 22717 22018 22569 21879 22918 21921 22730 21472 23232 21623 22672 21176 23539 21597 22409 21360 23552 21398 22298 21040 23670 21125 22552 21162 23636 21233 22495 21157 23688 21218 22414 21428 23580 21440 22350 21427 23342 21709 22319 21757 23178 21740 22292 21864 22856 22220 22074 22160 22596 22114 22196 22060 22585 22260 22279 22048 22777 22152 22211 21901 22699 22049 22227 21889 22659 22113 22066 22176 22535 22182 22288 22048 22560 22200 22226 22283 22409 22327 22172 22132 22482 22304 21958 22074 22483 22280 21996 22354 22459 22307 21968 22200 22299 22426 21762 22308 22211 22617 21851 22368 22351 22492 21773 22503 22294 22592 21785 22595 21968 22763 22251 22426 22261 22489 21737 22376 22097 22654 21857 22444 22419 22484 21763 22640 22048 22848 22306 22823 21865 22768 21920 22966 21720 22803 21536 23144 21608 22672 21553 23037 21729 22784 21792 23073 21688 22685 21583 23017 21732 22819 21625 23095 21538 22804 21664 23068 21667 22685 21760 23175 21714 22837 21632 22974 21876 22345 21851 22467 22320 22522 22098 22579 22083 22442 22336 22407 22593 22382 21411 22560 22460 22329 21866 21915 22727 21966 21991 21731 23127 21847 22113 21531 22853 21892 22351 21774 22850 21801 22300 21930 22753 21872 22432 21776 22788 22024 22364 21880 22733 21767 22487 21821 22938 21801 22512 21790 22852 21771 22615 21891 124 96 95 0 1876 4548 7478 8155 10338 43584 43648 43664 40648 33751 30647 156 113 7662 12705 14087 16160 16755 17705 17405 43571 43664 43681 35446 31267 28992 180 4695 12983 15923 17895 18280 19621 19249 20254 19764 44120 37592 31914 28311 27429 254 11213 15918 19007 18892 20983 19886 21147 20118 21960 43650 32772 27553 27435 25212 25479 14787 20181 20057 21686 21033 22133 21504 22139 21456 35984 28513 25921 24692 24333 24320 23879 23552 23589 23666 23281 23321 23780 22624 23780 22649 23103 22163 24125 22190 23061 21896 24173 21933 23229 21763 23938 21764 23316 21966 23761 22229 23189 22121 23133 22537 22872 22272 22117 23425 22074 22689 22058 23149 22095 22797 21993 23212 22119 22691 22161 23030 22318 22857 22208 22734 22844 22812 22463 22548 22841 22557 22331 22280 22821 22391 22299 22305 22709 22500 22316 22484 22577 22669 22280 22601 22347 22818 22232 22754 22138 23123 22081 22750 21644 23313 21767 23115 21760 23219 21863 22896 21976 23027 22041 22814 22272 22889 22112 22688 21912 22498 22390 22795 21878 22605 22257 22596 21920 22423 22415 22566 21920 22450 22333 
