# Supplementary material for: An Active Feature Selection Strategy for DWT in Artificial Taste
Source: Hindawi journal article supplement (doi:10.1155/2018/9709505), 2018-01-01
Supplement: f1 [file 9709505.f1.zip › puerTea-hi-2.txt]

43465 43472 43532 43474 57 49 16423 20583 20911 22085 21542 22602 21879 22807 21719 22803 22135 22968 22412 23005 22372 23111 22248 23199 22112 23208 22031 23408 21952 23244 22098 23508 22071 23156 22211 23402 22037 23296 22041 23452 22034 23273 22145 23501 22074 23396 22119 23481 21941 23229 22010 23321 22115 23098 22156 23354 22195 23159 22421 23124 22549 23101 22336 22887 22709 23015 22305 22946 22855 22973 22494 22505 23067 22456 22692 22064 23420 22311 22816 22080 23485 22032 22814 22133 23512 22203 22938 22144 23304 22341 22969 22640 23031 22887 22712 22799 22395 23437 22397 22695 21917 23827 22004 22682 22376 23040 22696 22586 22656 22966 22747 22757 22828 22888 22670 22752 22616 22903 22677 22656 22822 22737 23023 22621 22836 22604 23051 22812 22946 22688 22873 22608 22858 22573 23083 22491 22946 22784 22947 22456 22848 22804 22839 22460 22775 22784 22886 22328 22806 22813 23000 22349 22934 22747 22963 22528 22759 22761 22869 22298 22845 22696 22992 22279 22898 22803 22892 22307 22784 22681 22900 22459 22690 22832 22854 22404 22813 22596 23135 22358 22860 22647 23008 22314 77 13064 16982 17700 19531 19085 20344 19332 20658 19429 34569 24609 24488 22769 23562 22573 23883 22513 23265 22276 23720 22528 23176 22169 23973 22144 23064 22016 23803 22294 22820 22552 23213 22711 22800 23302 22548 23045 22193 23648 22121 23008 22220 23687 22220 22912 22146 23552 22536 22522 22660 23337 22816 22873 22507 23367 22605 23008 22616 22994 22767 22800 22843 22773 22861 22740 22798 22858 22690 22739 22963 22753 22597 22667 23011 22786 22585 22857 22928 22816 22403 22917 22626 23225 22048 23227 22425 23192 22135 23527 22086 23191 21942 23586 22082 23199 21897 23633 22151 23109 22025 23525 22272 23082 22277 23268 22434 23118 22640 23089 22472 23164 22528 23106 22518 22856 22788 22939 22322 22703 22855 22926 22231 22995 22704 23095 22230 23416 22580 23219 22188 23149 22444 23175 22366 23360 22230 23159 22159 23464 22149 23182 22086 23404 22196 23025 22190 23405 22261 22936 22434 23175 22640 23012 22423 23237 22605 22817 23080 22301 22769 21984 23580 22072 22633 22178 23379 22705 22538 22999 22964 22804 22267 23264 22340 23075 21973 23708 21974 23052 21797 23864 21967 22765 22108 22958 22780 22481 22957 22824 22885 22286 15928 19537 21252 20569 21795 20939 21279 20936 21932 43474 25133 22784 23528 22920 23155 23041 23029 22710 22864 23121 23090 22327 23123 22872 23209 22776 23336 22442 23364 22339 23638 22125 23367 22136 23584 22013 23424 21959 23715 22119 23145 22114 23618 22278 23097 22122 23591 22368 23188 22433 23178 22424 23040 22769 22848 22455 22856 22755 22921 22306 22807 22839 22958 22213 23171 22642 23120 22272 23324 22363 23259 22197 23444 22381 23248 22337 23532 22119 23080 22050 23504 22216 22905 22237 23246 22464 23296 22599 22854 22626 22843 22827 22713 22724 22199 23449 22218 22760 22024 23611 22117 22817 21910 23644 22116 22514 22083 23456 22329 22392 22504 22955 22818 22219 23425 22215 23098 21888 23737 21830 22859 21985 22919 22762 22471 23177 22387 23095 22501 23368 22288 23020 22208 23336 22513 22848 22640 23025 22604 22748 22705 22829 22568 22696 23052 22779 22396 22941 22509 23225 22285 23463 22167 23076 22097 23459 22229 23048 22160 23324 22331 23015 22600 22912 22293 22787 22736 22928 22255 22732 22753 22924 22298 22903 22631 23101 22262 23058 22488 23238 22119 23075 22569 23129 22581 23169 22390 23230 22201 23372 22103 14164 20492 22345 21049 22073 21097 22475 21319 22147 21595 25338 22948 23399 22991 23008 22692 22736 23087 22912 22505 22756 23030 23004 22414 22993 22696 23190 22164 23725 22124 23192 21815 23747 22104 22696 22438 22455 22924 22232 23686 22132 22561 22425 23063 22583 22345 22832 22311 23112 22072 23839 21916 22962 21974 23382 22870 22377 23286 22227 22889 22326 23352 22581 22828 22772 22767 22721 22555 23040 22806 22435 23196 22339 23160 22000 23552 22356 22934 22232 23201 22512 22752 22834 22802 22311 23091 22405 23233 22000 23497 22089 23060 22384 23109 22385 22984 22645 22960 22208 23111 22218 23158 21974 23544 22248 23098 22688 22840 22241 23000 22433 23281 22250 23581 22059 23144 22151 23280 22464 22876 22793 22944 22146 23250 22117 23264 21821 23545 22112 22928 22529 22920 22548 22631 22850 22794 22352 23224 22170 22994 22025 23350 22501 22870 22775 22618 22547 22459 23115 22898 22493 23679 21751 22784 22058 23007 22829 22548 23304 22049 22504 22439 22820 23174 21860 23744 22251 22919 23234 22396 22906 21881 23301 22692 22589 23015 22716 22439 22932 22452 23035 22155 23319 22629 22776 22898 22612 22449 23021 22234 23175 22181 22278 21466 22180 21975 22177 21880 22317 21868 22731 26032 24025 22473 23692 22781 22972 22369 23159 22316 23328 21944 23544 22409 22958 22764 23052 22258 23373 22275 23273 21921 23458 22197 23618 22547 22840 22264 23188 22087 23245 22108 23111 22469 22717 22574 23112 22146 23610 22148 23179 22618 22863 22226 23321 22141 23050 22210 23149 22546 22518 22740 23120 22390 23413 22168 22852 22693 22701 22348 23058 22315 23061 22045 23018 22596 22316 23405 22931 21921 23779 21938 22640 22927 22044 22615 22803 22439 23072 21792 23153 22791 22144 23607 22346 22370 23288 21891 22725 22379 22386 23002 22105 23489 22386 22241 22872 22647 22560 22614 22724 23056 22252 23330 22432 22867 22581 22918 22398 22825 22640 23035 22058 23474 22300 22829 22714 22756 22337 23100 22176 23280 21959 23522 22150 22989 22592 22912 22110 23331 22086 23218 22001 23196 22473 22688 22621 23072 22120 23437 21934 23152 22208 22982 22405 22727 22540 23174 22077 23431 22080 23013 22775 22864 22104 23353 21904 23201 21997 23123 22390 22723 22743 22964 22243 23381 22112 22921 22358 22898 22556 22633 22837 22981 22400 23437 22160 22889 22258 22678 22609 22173 23449 21042 21946 23013 21487 22480 22161 22309 22596 21717 23227 23066 22431 23024 22295 23138 21780 23569 22657 22464 23412 22088 22488 22648 22960 22764 22564 22874 22792 22423 22923 22455 22983 22240 23200 22679 22593 22976 22825 22837 23286 22148 23141 22045 23211 22454 22869 22716 22776 22337 23065 22156 23152 21919 23482 22347 23005 22631 22818 22442 22822 22469 22999 22277 23413 21940 23204 21984 23372 22284 23023 22696 22712 22293 22877 22457 23235 22017 23507 22172 22848 22442 22933 22418 22892 22404 23065 22336 23368 22024 23122 22068 23198 22356 22680 22723 22995 21997 23370 22133 22949 22085 23158 22473 22943 22791 22675 22311 22804 22535 23026 22030 23416 22148 22939 22524 22848 22515 22380 23297 22479 22443 22670 22293 23114 21904 23855 21818 22609 22205 22887 22840 22180 23312 22060 22500 22396 22823 23091 21876 23828 22186 22509 22747 22409 22983 21949 23589 22232 22850 22262 23131 22605 22732 22885 22647 22513 22777 22650 22952 22203 23268 22240 22939 22116 23168 22535 22829 22755 22773 22473 22903 22318 23216 22085 23600 22139 22929 22336 22841 22410 22676 22568 23085 22068 23485 22029 23032 22311 22992 22297 22771 22659 23051 22550 23398 21965 23057 22025 23282 22356 22944 22698 22839 22280 22836 22423 23196 22028 23584 22041 22973 22297 22872 22473 22734 22572 23235 22048 23466 22070 23218 21801 23509 22119 23031 22427 23016 22436 22685 22836 22833 22244 22954 22277 22997 22080 23283 22498 22758 22664 22745 22408 22625 22860 22855 22111 23264 21998 23083 21696 23618 22437 22776 22164 22797 22784 22234 23458 22028 22348 22458 22532 23041 21939 23744 21762 22610 22475 22937 22600 22488 23200 21968 22836 21976 23528 22530 22784 22647 22808 22562 22485 22959 22778 22499 22985 22483 22976 22065 23381 22252 22854 22455 23134 22480 22875 22662 22761 22641 22691 22668 22720 22454 22587 22704 23008 21632 23360 22131 23101 21984 23559 22054 23052 22242 23152 22433 22848 22650 22858 22165 23008 22453 23232 22032 23344 22108 23168 21888 23569 22193 22972 22185 23096 22317 22899 22725 22873 22220 22790 22617 23047 22132 23116 22400 23265 22048 23602 21909 23095 21922 23401 22228 23079 22544 22722 22495 22567 22775 22724 22429 22514 22869 22871 22292 22921 22357 23072 22059 23411 22151 22886 21863 23648 21895 22807 22080 23308 22752 22306 23273 22024 22640 22102 23081 22741 22163 23571 21896 23058 21845 23691 22243 22560 22737 22400 22867 21897 23605 22221 22738 22640 22899 22518 22791 22884 22797 22727 22518 23078 4655 16373 18825 19340 20429 19447 20795 19831 20599 43448 28448 23821 23242 22977 23355 22765 23205 23002 23025 22615 22931 22980 22941 22422 23069 22732 23233 16962 21754 20933 21968 20944 22373 20790 22033 20567 43462 23820 23320 22453 23900 22523 23406 22169 23853 22388 23331 22214 23605 22321 23172 22439 23474 49 21272 21308 22180 21568 22431 21751 22349 21743 22220 27360 23407 23008 23202 23136 22928 22599 22803 22961 22789 22642 22708 22996 22871 22470 22749 22923 16512 21379 22073 22296 22272 21895 22408 22320 22439 21757 24373 22920 23424 22391 23565 22657 23162 22432 23542 22282 23120 22487 23292 22514 23084 22377 23323 21159 22660 22016 23016 22156 22656 22668 22602 22606 22262 23308 22548 23388 22583 22946 22622 23232 22580 22844 22477 23313 22403 23113 22209 23394 22156 23184 22276 23388 22297 23228 22436 23296 22277 23193 22198 22912 22462 23043 22327 23008 22620 23040 22272 23032 22585 23088 22279 22723 22721 22862 22345 22747 22702 22879 22439 23081 22744 23063 22353 23152 22154 23413 22040 23075 21793 23444 21988 23134 21968 23513 22144 23154 21817 23483 22106 23154 21881 23600 21921 23148 22165 23382 22295 23151 22217 22756 22700 22863 22393 22544 22864 22571 22521 22764 22692 22919 22422 23076 22516 23028 22453 22894 22107 23271 22132 22969 21559 23780 21891 23072 21866 23559 21976 23061 21911 23492 22500 22676 22371 22265 23335 22337 22467 22072 23437 22053 22672 21802 23620 22592 22637 22119 22421 23421 22442 22504 22543 22994 22700 22459 22741 22708 22959 22539 22764 22292 23266 22284 22977 22055 23252 22250 23079 22484 22803 22773 22872 22436 22475 22750 22727 22617 22807 22638 22968 22487 22349 22376 23163 22244 23011 22024 23476 21990 23117 21845 23569 21936 23275 21929 23491 22024 23136 22035 23117 22329 23149 22626 23104 22512 23179 22135 22960 22529 23017 22212 22704 22615 23008 22319 22629 22758 22789 22325 22668 22564 22935 22327 22864 22609 22953 22312 23104 22341 23111 22301 22923 22013 23325 22124 23015 22175 23363 22218 23136 22309 23121 22551 22848 22299 22698 22873 22759 22559 22336 23129 22458 22520 22726 21984 23444 22031 22682 21703 23762 21802 22976 21833 23537 22529 22605 22341 22192 23377 21942 22702 21952 23426 22170 22924 22295 23173 22716 22676 22799 22820 22916 22628 22423 22656 22826 22813 22649 22200 22560 23120 22368 22814 22140 23273 22162 23108 22272 23212 22298 23134 22454 22979 22556 23004 22352 22808 22634 22878 22151 22603 22636 22757 22370 23014 22488 23127 22296 22990 21874 23537 21871 23337 22183 23206 22455 23076 22180 22742 22616 22805 22313 22710 22611 22964 22276 22965 22297 23296 22008 23097 21934 23552 22000 23239 22200 23177 22376 23076 22127 22737 22800 23069 22405 23000 22167 23314 22225 22981 21865 23409 22121 23096 22257 22872 22695 22743 22439 22583 22749 22800 22541 22359 22350 23096 22232 22961 21824 23581 22060 23024 22322 22157 23363 22083 22767 22152 23068 22898 22199 22764 21711 23795 22140 23034 22375 22333 23564 21972 22876 22052 22954 22907 22532 22532 21864 23541 22473 22720 22315 22279 23333 53 16375 18848 20819 20262 20725 20480 20672 20968 20774 38452 24656 23131 23641 22729 23316 18119 22156 21223 21937 21120 22028 21600 21764 21484 43440 24088 23750 22580 23426 22265 19559 21037 22389 21580 22314 22063 22241 21679 22298 21974 24646 22981 23500 22552 23793 14582 22286 21427 22871 21681 22788 21744 22603 22257 22549 23552 23189 23072 23180 22697 23271 21582 23386 21841 23124 21898 23265 21912 23028 22380 24852 23091 22967 22665 23079 22675 23424 22372 23138 22243 23343 22604 23104 22390 22712 22960 22796 22581 23024 22116 23508 22327 23034 21952 23520 22528 22970 22389 22164 23600 22112 22972 22237 23196 23044 21979 23086 22017 23489 22605 22784 22477 22161 23606 22072 22767 22152 23275 22873 22574 22579 22023 23031 22769 22567 22577 22609 23180 22349 22885 22291 23276 22534 22898 22548 22635 22865 22661 22568 22987 22282 23456 22221 23042 22211 23153 22405 23023 22172 22583 22784 23191 22193 23025 22045 23335 22471 22979 22247 22743 22633 23151 22225 23026 21905 23592 22018 23105 22215 22763 22560 23020 22185 23012 21939 23517 22316 23079 22216 22923 22487 23370 22240 23160 
22164 20787 21773 21133 21408 21202 21888 21567 22141 21766 21993 21434 21428 21161 21429 21708 21733 21511 21530 21334 21461 20983 21494 21504 22130 21888 22081 21356 21423 21057 21890 21506 21838 21275 21760 21056 21275 20942 21704 20977 21376 20941 21779 20942 21312 21009 21693 20980 21255 20999 21614 20993 21249 21007 21721 21020 21488 20971 21995 20889 21449 20672 22009 20829 21667 20748 21944 20877 21652 20768 21955 21136 21665 20953 21717 21201 21591 21024 21649 21185 21577 21364 21653 21159 21588 21037 21560 21336 21428 21045 21444 21587 21360 21056 21209 21569 21349 21205 21290 21552 21405 21161 21571 21404 21685 21244 22016 21085 21912 21125 21607 20929 22096 20935 21515 20956 22005 21145 21507 21079 21927 21054 21597 20864 21993 21015 21539 20948 21970 21003 21453 21024 21904 21021 21562 20880 21836 21060 21578 20984 22043 21067 21473 21175 21857 21333 21020 21462 21865 21328 21337 20969 22250 20945 21339 20976 22020 21376 21486 21283 21596 21492 21223 21755 21184 21733 21430 21549 21852 21361 21169 21434 21322 21632 21050 21779 21214 21696 21296 21672 21354 21633 21484 21701 4353 11515 13122 15620 15419 16740 16558 17659 17053 16708 42705 28472 22959 22243 22135 22480 21960 22404 21994 22407 21927 22251 22147 22167 21894 22420 22023 22151 21853 22101 22038 22181 21613 22023 22039 22173 21627 22103 21960 22272 21511 22074 21932 21485 21120 21891 20914 21879 20793 22133 20937 21803 20867 22052 21105 21916 20791 22358 21590 23361 21624 23075 21542 22522 21423 22812 21457 22225 21473 22535 21647 22157 21647 22289 21777 22199 22063 22075 21847 21988 22031 21979 21751 21848 22067 22007 21726 21830 22135 22126 22056 21936 21897 22339 21473 22202 21696 22301 21343 21864 20680 21591 20446 22347 20647 21554 20493 22509 20781 21414 20603 22472 20740 21369 20760 21983 21331 21176 21607 21335 21799 21063 21848 21057 21763 20978 21977 21031 21621 21079 21893 21047 21505 20921 22037 21040 21564 21040 21920 21248 21571 21237 21756 21328 21600 21536 21484 21275 21501 21559 21363 21173 21249 21625 21325 21136 21265 21563 21497 20960 21737 21212 21776 21068 21895 20984 21704 20717 22130 20896 21672 20741 22103 20833 21624 20913 21955 21071 21685 21166 21640 21328 21799 21299 21568 21291 21377 21478 21443 21133 21230 59 13931 16597 18536 18666 19247 18677 19730 18909 19646 29320 25223 22139 22301 21451 22430 21543 21760 21557 21975 21577 21636 21742 21524 21569 21481 21905 21381 21377 20848 22321 21304 21317 20952 22322 21320 21213 21440 21800 21699 20882 22060 21120 21737 20704 22185 21133 21771 20672 22464 20649 21460 20752 22209 21096 21278 21221 22134 21448 21207 21768 21235 21703 21180 21838 20975 21594 20947 21975 20978 21510 20879 22019 21104 21468 20811 21902 21179 21431 21305 21572 21399 21335 21319 21454 21248 21248 21600 21291 21111 21425 21384 21504 20999 21644 21324 21586 21157 21797 21077 21725 21061 21760 21065 21715 21093 21956 20992 21654 20929 21989 20846 21597 20659 22209 20907 21560 20982 21712 21103 21414 21284 21430 21134 21180 21612 21338 21063 21325 21423 21530 20983 21665 21126 21658 20855 22091 20806 21454 20959 21831 21022 21442 21161 21487 21258 21417 21504 21172 21191 21130 21524 21399 20832 21741 21184 21614 20839 21908 20806 21569 20427 22507 20738 21184 21197 21909 21346 20981 21889 21427 21520 21001 22063 20946 21576 20712 22232 20784 21660 20666 22368 20809 21637 20619 22029 20819 21490 20748 21912 20916 21400 15719 19719 19850 19850 20206 20189 20320 20171 20596 20256 23813 22164 22162 21842 21403 21728 21609 21911 21285 21850 21229 21813 20948 22114 20973 21686 20891 22061 21156 21619 21301 21480 21245 21469 21499 21467 21047 21495 21336 21701 20887 21929 20941 21620 20761 22093 20843 21701 20775 21906 21069 21566 21321 21360 21127 21117 21570 21355 21065 21818 20912 21767 20733 22170 20763 21584 21071 21600 21284 21144 21646 21425 21138 21385 21223 21624 20903 21890 20879 21518 20800 21792 21248 21363 21601 21191 21143 21047 21672 21490 20927 22248 20615 21530 20373 22251 21304 21017 22130 20667 21173 21132 21379 21768 20505 22489 20856 21399 21844 20736 21568 20482 22306 21239 21149 21645 21271 21209 21167 21453 21520 20955 21962 21027 21384 21125 21496 21370 21273 21588 21242 21069 21379 21308 21578 20983 21837 20859 21513 21136 21648 21152 21092 21556 21369 21076 21732 20884 21628 20724 22032 20997 21657 21372 21337 21104 21168 21514 21493 20677 21878 20856 21556 20789 21795 21211 21280 21439 21586 21001 21595 20987 21726 20552 21914 21088 21538 21477 21289 21024 21653 21016 21714 20673 22009 21139 21504 21597 21161 21196 21161 17974 20288 20067 21128 20224 20727 20708 20677 20472 20764 22615 22096 21049 22098 21130 20804 21802 20864 21333 21081 21484 21862 20495 22099 21388 20707 22298 20687 21276 20816 21363 21650 20592 22496 20688 21498 21936 20627 21112 21560 20680 21313 21241 21057 21637 20678 21863 21239 21216 21623 21367 21236 21916 20889 21432 21521 21216 21168 21265 21085 21654 20739 21900 21079 21344 21513 21431 21181 21921 20889 21460 21155 21319 20974 21234 21248 21699 20643 21973 21072 21445 21484 21351 21251 21905 20702 21553 21103 21341 21044 21305 21228 21681 20803 21990 20869 21436 21545 21276 21024 21391 21108 21668 20722 22139 20956 21735 21351 21384 21138 21300 21319 21592 20800 21916 20887 21425 21319 21207 21153 21228 21380 21583 20738 21879 21046 21461 21498 21203 21169 21356 21214 21625 20866 22369 20932 21312 22139 20598 21107 21463 20914 21597 20686 21824 21609 20653 22279 20983 21178 21988 20589 21446 21094 21277 21616 20480 21800 21206 21244 21504 21363 21259 21867 20945 21379 21456 21079 21104 21396 21026 21511 20812 21911 21029 21395 21495 21189 20952 21517 21067 21653 20656 21998 21061 21335 21393 21319 20996 21625 21233 21639 19895 21532 20407 20657 20965 20957 20661 21141 20787 23338 21004 22182 20921 21517 21028 21611 21156 21317 21435 21580 21140 21963 20765 21539 20992 21709 21189 21393 21303 21293 21044 21565 20873 21689 20654 21776 21228 21195 21575 21271 21017 21543 20999 21581 20813 21900 21142 21296 21460 21216 21095 21409 21109 21632 20705 21958 20964 21410 21105 21191 21440 20886 22191 20793 21102 21444 20917 21652 20400 22460 21008 21293 21818 20871 21527 20526 22098 21425 20729 22443 20683 21191 21431 20896 21561 20737 21951 21041 21943 21403 21235 21128 21312 21364 21474 20900 21837 21007 21433 21258 21248 21181 21093 21509 21453 20292 21680 20912 21495 20816 21754 21257 21504 21456 21240 21039 21467 21180 21624 20972 21952 20793 21543 20817 21824 21064 21575 21312 21351 20963 21269 21334 21470 20908 21969 20769 21570 20807 21691 21063 21317 21461 21383 21072 21433 21177 21597 20763 21636 20883 21600 20745 22049 21038 21565 21305 21350 20995 21305 21216 21504 21129 21707 20932 21577 20801 21875 21114 21526 21425 21195 21112 21219 21325 21521 20967 21944 20858 21420 20949 21329 21278 20705 21797 21377 21111 22070 20395 21335 20775 21632 21454 20725 22349 20711 20975 21620 20910 21671 20450 22263 21181 21226 21367 20971 21639 20627 22188 21387 20961 22144 21020 21059 21588 21089 21575 20807 21847 21088 21305 21120 21465 21344 21123 21721 21131 21115 21224 21297 21632 20924 21823 20808 21410 21239 21625 21327 21057 21466 21266 20880 21584 21046 21785 20765 22057 20981 21490 21128 21481 21024 21216 21387 21324 20977 21345 21269 21557 21001 21959 20832 21508 20809 21767 21056 21463 21387 21333 20980 21131 21498 21469 21152 21755 20896 21700 20748 22017 20880 21413 21077 21728 21176 21332 21523 21356 20957 21498 21059 21656 20870 21877 20893 21477 20717 21918 20885 21376 20931 21743 21168 21238 21457 21323 21172 21037 21605 21300 21176 21571 21553 21423 20894 22169 20617 21479 20525 22036 21202 21162 21936 20642 21515 20512 22304 21082 21097 21184 21440 21507 20720 22222 20468 21313 20663 22153 21089 21216 21760 20824 21615 20696 21936 20807 21506 20766 21780 21204 21777 21408 21286 21277 21053 21555 21223 20992 21388 21177 21575 20921 21618 21176 21591 20884 21835 20912 21475 20919 21815 21136 20882 21362 21670 21104 21293 21448 21302 21039 21289 21291 21532 20624 21804 20837 21624 20665 22000 21028 21424 21083 21491 21177 21228 21382 21301 20873 21413 21169 21642 20806 21898 20859 21456 20886 21929 20935 21528 20743 21907 21101 9024 14119 15953 16813 17784 17733 18337 17725 18750 42797 32608 24604 23089 21696 22208 21472 22631 21626 22147 21687 22149 21813 22112 22247 21721 21959 19 5698 13013 15736 15740 17576 16878 17243 20189 20256 43309 28398 24448 22184 22900 21836 22693 21787 22431 21461 22809 21475 22400 21226 22618 21744 21783 6 13989 17059 17947 18400 19111 18813 18928 18944 19573 34502 24672 23128 22666 22472 22325 22353 22092 22075 21764 22262 21768 22167 21449 22381 21457 22311 9685 18473 18816 20179 19396 20922 19670 20564 19671 21107 26128 23728 21863 23047 21655 22295 21310 22661 21597 22061 21315 22647 21344 22172 21157 22615 21264 18000 19617 21445 20314 21285 20384 21728 20633 21404 29692 24283 21751 22568 21461 22765 21354 22281 21264 22535 21313 22194 21478 22068 21883 22114 21513 21905 21871 21956 21458 21801 21856 21921 21536 21720 21989 21713 21604 21643 22056 21581 21751 21288 22297 21425 21953 21577 21839 21996 21685 22185 21463 22501 21421 21680 21018 22779 21037 21858 20749 22722 20965 22088 21033 22430 21445 21984 21495 21991 22224 21678 21889 21570 21997 21627 21584 21496 22008 21552 21659 21369 22199 21481 21768 21244 22319 21305 22101 21401 22090 21383 22081 21495 21587 21957 21687 21504 21530 21824 21672 21468 21515 21891 21767 21514 21975 21646 21895 21508 21966 21385 22272 21308 22016 21064 22272 21159 21883 20944 22311 21061 21851 21152 22180 21320 22060 21205 22149 21460 22025 21422 21512 21865 21545 21479 21561 21824 21591 21447 21861 21287 22196 21063 21936 21017 22417 21115 22104 21248 21783 21771 21663 21395 21456 21911 21520 21626 21649 21687 22054 21480 21721 21350 22295 21194 21751 20974 22318 21238 21820 21045 22390 21309 21968 21441 21787 21898 21541 21399 21314 22356 21279 21281 21265 22504 20964 21750 20918 22678 20867 21739 21027 22448 21006 21907 21235 22144 21348 21783 21064 21610 21455 21659 21345 21686 21536 21674 21227 21513 21760 21345 21392 21259 21852 21292 21593 21394 21924 21603 21369 21504 21393 22007 21319 21649 21010 22273 21174 21705 21029 22149 21035 21843 21159 21830 21391 21834 21241 21459 21558 21529 21225 21450 21514 21685 21397 21141 21419 22128 21220 21764 21032 22118 21132 21944 21344 21924 21451 21985 21494 21753 21660 21557 21217 21552 21802 21447 21601 22131 21143 22073 21116 21725 20705 22201 20888 21875 21211 22016 21376 21783 21187 21495 21671 21432 21224 21237 21963 21593 21520 21369 21876 21447 21344 21385 21573 21588 21262 21680 21008 22304 20948 21762 20638 22293 21421 21562 20869 21334 22577 20885 21739 20999 22128 21469 21716 21389 21307 22345 21044 21477 20483 22702 20728 21861 21078 21717 21944 21384 21425 21072 22071 21105 21750 20935 21984 21218 21664 21421 21144 21918 21344 21522 21320 21740 21697 21322 21687 20960 22135 20856 21873 21319 21811 21580 21676 21113 21230 21706 21400 21424 21530 21677 21862 21333 21890 21206 22253 21164 21945 21255 21772 21648 21793 21369 21445 21570 21714 21316 21740 20920 22230 20888 21810 21085 21677 21574 21649 21309 21413 21543 21569 21152 21589 20920 22101 21125 21969 503 68 7312 11138 11830 12784 13255 13599 13647 14237 43361 31865 24100 23255 22173 22852 2746 13943 15162 16357 16966 16999 17236 17771 17197 43355 29057 24297 22693 23074 22272 6023 15729 17032 19113 18368 18944 18795 18764 20114 43347 28438 23075 23953 21771 22743 8042 18149 19820 19287 19932 19393 21040 19872 20535 20007 27156 24151 22613 22244 21952 11589 19383 20615 20834 20901 21361 20864 21134 20602 21562 25985 23188 21856 22136 22219 21891 21808 21884 21904 22235 21523 22192 21290 22428 21591 22151 21479 21874 21916 21856 21634 22181 21543 22396 21368 22028 21004 22423 21296 22216 21724 22030 21751 21898 21451 21944 21568 22272 21285 22052 21086 22531 21235 22297 21136 22137 21590 21937 21388 21719 21775 21917 21480 21991 21068 22444 20983 22175 21225 22264 21616 21997 21366 21643 21768 21837 21531 22104 21098 22408 21292 22181 21835 21905 21891 21687 21596 21662 21705 21984 21408 21973 21172 22060 21401 21159 21296 20978 21234 22019 20839 21668 20542 22242 21253 21350 21290 20855 21642 22064 20647 21783 20944 21830 22018 20947 21568 21049 21642 22071 20649 21770 20943 21674 
22070 21589 22231 21960 21770 21373 21795 21224 21987 21659 22327 21536 22007 20865 21852 21193 21889 21698 22485 22106 22387 21799 22037 21464 21955 21765 22100 21661 21807 21412 21635 21392 22231 21897 22490 22218 22016 21473 21655 21360 21811 21814 22193 21827 21865 21077 21111 20980 22121 22664 22768 22375 22154 21336 21129 21014 21854 22022 22300 21789 21410 21085 21109 21401 22072 22436 22912 22777 22080 21740 21506 21709 21671 22112 21751 21728 21068 22547 21092 21784 20939 22661 21093 21784 21121 22684 21106 21959 21177 22646 21155 21941 21469 22128 21681 21821 22060 21656 22224 21449 21634 21094 22731 21376 21688 21448 22189 21673 21714 21527 22150 21585 21888 21622 22180 21648 21880 21553 22138 21603 21801 21714 21958 21799 21681 21833 22035 21656 21722 21836 21960 21707 21815 21941 21840 21728 21733 21635 22026 21689 21664 21671 22010 21756 21547 21605 21973 21764 21520 21623 21959 21752 21604 21653 21970 21715 21659 21585 21949 21804 21555 21812 21888 21884 21498 21875 21900 21824 21555 21729 21937 21760 21700 21648 21917 21888 21504 21958 21786 21883 21477 21768 21885 21845 4071 15168 17794 18924 18749 20239 19275 20032 19200 43329 25260 22688 20953 22375 21312 21985 21240 22473 21504 21939 21218 22448 21536 21860 20964 22801 21396 21750 21446 22400 21664 21322 22016 21690 21921 21262 22469 21113 21923 21046 22576 21067 21861 21043 22727 21283 21613 21652 22202 21884 21206 22065 22144 21687 21828 21601 22000 21743 21792 21956 21692 21944 21783 22103 21600 21828 21781 22092 21683 21796 21497 22097 21602 21648 21625 21986 21865 21603 21603 21904 21949 21547 22113 21601 22012 21441 22304 21383 22103 21211 22454 21295 22019 21316 22492 21287 22000 21355 22338 21528 22055 21571 22173 21633 22026 21835 21871 21624 21705 21943 21799 21603 21818 21985 21735 21568 21676 22013 21805 21570 21645 21793 22024 21480 21952 21760 22199 21512 21986 21669 22210 21524 22345 21362 22102 21252 22440 21324 22018 21258 22478 21249 21975 21244 22424 21449 21857 21448 22353 21702 21875 21730 21874 21718 21828 21829 21699 21944 21205 22491 21081 21852 21113 22555 21249 21477 21972 21763 22122 21504 22100 21524 22171 21349 22679 21063 22140 20947 22912 20880 21761 20973 22843 21178 21751 21761 22116 21848 21569 22070 21792 31 17959 20748 20642 20828 20587 21127 20823 20968 20833 29270 22357 21520 21861 21838 21832 21647 22087 21668 21669 21778 21893 21986 21516 21991 21708 22162 21573 22298 21464 22167 21219 22409 21298 22184 21145 22499 21194 21988 21248 22356 21559 21955 21478 22218 21476 22003 21501 22189 21634 21860 21869 21820 21570 21624 22023 21719 21653 21720 21952 21780 21560 21687 21967 22028 21465 22119 21637 22166 21449 22300 21467 22082 21206 22236 21504 22041 21176 22412 21465 21888 21400 22331 21517 21936 21624 22103 21821 21803 21973 21659 21759 21544 22341 21383 21817 21010 22656 21220 21716 21064 22731 21070 21671 21144 22535 21616 21652 21439 22165 21981 21874 22289 21453 22209 21185 22840 20985 22007 20858 22876 21040 21679 21931 21796 22058 21632 22362 21513 21945 21336 22280 21562 21877 21490 22069 21872 21911 21993 21667 21748 21712 22096 21666 21775 21632 21963 21895 22016 22192 21511 22068 21208 22459 21416 21906 21633 22258 21556 21963 21677 22024 21637 21825 21965 21815 21537 21671 21968 21792 21552 21771 21924 21931 21485 22028 21676 22103 21455 22149 21671 22222 21437 22125 21677 22249 21637 22258 21304 22123 21334 22390 17895 21742 20483 21936 20905 21514 20982 21978 21162 43028 22395 22061 21797 21671 22111 21803 21671 21613 22010 21723 21571 21679 21783 22072 20906 22158 21462 22055 20987 22800 21016 21829 21191 22484 21632 21755 22424 21174 21799 21143 22586 21536 21682 22166 22199 21960 21353 22707 21015 22145 20783 22773 21160 21728 21985 21696 22100 21298 22434 21527 21832 21505 22041 21865 21728 22145 21632 21728 21712 21784 22112 21403 22323 21353 22008 21392 22185 21527 21952 21883 21881 21715 21627 21995 21996 21518 22215 21393 22006 21219 22312 21690 22098 21895 21978 21605 21729 21824 22098 21531 22441 21284 21952 21480 22053 21680 21652 21941 22077 21623 22103 21458 22190 21057 22532 21418 21836 21720 21853 21584 21668 21840 22179 21494 22426 21332 22016 21190 22414 21668 21895 21905 21724 21576 21754 21914 22033 21519 22464 21398 21936 21708 21837 21769 21613 22181 21650 21581 21699 21743 22247 21011 22853 21243 21637 22229 21523 21988 21069 22600 21457 21905 22283 20977 21919 21157 22247 22063 21173 22683 21158 21680 21749 21637 21957 21529 22064 21848 21504 22330 21477 21760 21773 21946 21815 21508 22052 22010 21629 22157 21498 14777 20710 21812 21511 21449 21880 21669 21424 22166 21171 23105 21579 22274 21874 21692 22024 22063 21507 22385 21226 21965 21704 21863 21569 21793 21792 22131 21421 22336 21347 21977 21568 22311 21739 21768 22012 21991 21364 22484 21391 21921 21885 21760 21528 22026 21429 22114 21243 22246 21696 21633 21944 22139 21462 22419 21515 22118 21858 21728 21632 21991 21532 22108 21147 22264 21748 21608 22059 22077 21689 22500 21413 21965 21953 21511 21736 21648 21361 22176 20828 22363 21872 21298 22709 21536 21485 22806 20954 21585 22224 21367 21986 21078 22165 22054 21029 22848 21568 21514 22208 21473 21826 21614 22062 21866 21513 22219 21767 21701 22093 21534 21898 21447 22007 21813 21816 22085 21834 21596 22056 21399 21969 21432 22190 21797 21596 21950 21935 21464 22460 21333 21952 21333 22227 21625 21627 21888 22074 21476 22475 21359 21952 21879 21720 21533 21979 21477 22113 21244 22468 21416 22157 21840 21746 21568 22192 21352 22090 21342 22246 21691 21728 21936 22101 21220 22493 21408 22466 21958 21736 21529 22093 21447 22160 21280 22391 21546 22099 21987 21687 21523 21913 21621 22157 21270 22391 21536 21744 22154 21537 21883 21322 21636 21992 20929 22824 21351 21618 22418 21017 21465 25687 22092 22077 21416 22779 21018 21872 21747 21575 21981 21117 22669 21816 21437 22350 21652 21716 21870 22001 21910 21697 22317 21544 21879 21803 21721 21720 21608 21909 22055 21380 22417 21422 21902 21772 21933 21776 21629 22103 21977 21299 22396 21383 22045 21485 22121 21736 21824 22019 21858 21522 21900 21696 22229 21207 22519 21316 21988 21667 21941 21771 21703 21945 21941 21552 22173 21325 22281 21212 22139 21672 21811 22040 21811 21348 22256 21672 22206 21153 22528 21433 22279 21847 21785 21585 21859 21730 22145 21205 22453 21537 21894 21961 21872 21719 21744 22052 21826 21543 22295 21346 22052 21325 22375 21672 21816 21992 21699 21647 21345 22252 21761 21356 22618 20923 21989 20808 22701 21488 21712 22292 21156 22072 21195 22603 21648 22043 22566 20870 22007 21235 22311 21803 21519 22591 21047 21799 21320 22273 21546 21916 21858 21703 21878 21495 22117 21895 21637 22176 21428 21941 21328 22390 21522 21893 21784 21829 21720 21531 22016 21889 21836 22333 21399 22055 21305 22199 21613 22000 22046 21792 21554 22087 21351 22167 21239 22421 21639 21992 21951 21856 21504 21960 21686 22121 21341 22478 21452 21916 21710 21824 21607 21591 21968 21907 21495 22228 21403 22114 21193 22342 21697 21964 22038 21729 21417 22087 21341 22183 21199 22512 21217 21993 21358 22290 21604 22041 21991 21737 21633 21702 21893 21913 21542 22395 21417 21937 21645 21857 21699 21844 22001 21872 21612 21793 21909 22077 21155 22784 21136 21888 21384 22250 21431 21725 22272 21331 21895 21048 22613 21746 21223 22547 21168 22089 20913 22690 21485 21725 21960 21703 22034 21128 22738 21272 21690 21639 22001 21883 21796 22058 21685 21660 21704 21971 21995 21632 22205 21488 21768 21489 22187 21792 21813 21848 21854 21824 21607 22063 21708 21627 21568 22066 21820 21565 22023 21610 22272 21414 22354 21449 22060 21323 22441 21489 22143 21840 21800 21571 21636 21940 21992 20961 22180 21486 22158 21208 22429 21224 22034 21266 22311 21600 21939 21861 21788 21740 21624 21994 22058 21496 21991 21516 22144 21497 22242 21265 22208 21085 22516 21368 22073 21536 22110 21719 21703 22088 21699 21595 21706 22126 21776 21525 21768 21863 22059 21426 22360 21436 22131 21141 22583 21416 22005 20923 22712 21458 21843 21991 21257 22031 21153 22699 21360 21528 22060 21607 22218 20823 22896 20928 21700 21341 22192 21841 21632 22550 21082 21887 21280 22320 21858 21776 21991 21634 21834 21664 22124 21579 21849 21440 14887 18784 19543 20663 19988 20504 20002 20960 20417 43205 23914 21735 21641 21894 21920 21783 21722 21698 22032 21784 21504 21641 21941 22019 21536 22094 27 20162 20787 21544 20726 21604 20619 21834 20512 21345 27121 22860 21527 21956 21603 22381 21376 22109 21464 22386 21437 21992 21495 22282 21479 21906 21690 15232 21169 21499 21415 21506 21299 21607 21509 21527 21377 23584 22297 21841 21773 21613 22092 21815 21696 21696 22064 21752 21595 21568 21939 21856 21550 21724 20214 21479 21240 21643 21684 21816 21463 21957 21325 43214 21940 22752 21351 22321 21280 22461 21343 22218 21155 22480 21368 22196 21324 22567 21413 22256 21421 21910 21134 22020 21267 22500 21545 21833 21708 21892 25643 21896 21952 21799 22167 21747 21933 21829 22161 21818 21880 21669 22404 21434 21972 21239 22388 21409 22069 21368 22321 21334 22103 21452 22290 21649 22066 21416 22048 21696 22067 21531 22007 21760 22071 21524 21974 21936 21865 21482 21680 21985 21800 21668 21646 21976 21771 21697 21702 21992 22044 21528 22110 21447 22349 21511 21963 21289 22511 21315 22078 21149 22361 21239 22021 21184 22544 21312 22139 21152 22452 21280 22233 21465 22339 21633 22062 21553 21837 21988 21750 21514 21580 22068 21719 21716 21773 21883 21803 21651 21822 21805 22022 21624 21974 21376 22592 21139 21991 20800 22872 20968 22227 20898 22712 21101 22182 21139 22151 22025 21934 21543 21648 22294 21530 21616 21256 22696 21240 21869 20940 22400 21729 21851 21443 21488 22006 21792 21635 21466 22057 21628 21689 21735 21909 21972 21641 21812 21424 22360 21421 21969 21465 22261 21600 21963 21527 21861 21994 21574 21744 21592 22080 21746 21671 21968 21952 21936 21765 21852 21709 22101 21626 21830 21321 22472 21249 22020 21131 22555 21208 22086 21236 22475 21361 22140 21640 22198 21521 22143 21990 22096 21734 22087 21463 22016 21705 21910 21419 22067 21804 21810 21488 21717 22016 21719 21507 21697 21984 21672 21721 21835 21810 21914 21664 21847 21725 22136 21581 21868 21335 22427 21296 22156 21230 22397 21456 22137 21548 22075 21705 21968 21463 21768 22130 21686 21592 21200 22448 21887 21580 21768 21626 22604 21292 21847 20956 22946 20996 22199 21112 22068 21959 21637 21451 21297 22805 21142 21961 21268 22695 21161 22088 21313 22177 21667 21896 21984 21601 22172 21627 21777 21707 22108 21774 21890 21792 21691 22254 21579 21847 21392 22411 21417 21985 21442 22257 21562 22018 21621 22179 21629 22001 21515 21800 21911 21988 21624 21593 22107 21723 21736 21913 21768 22103 21465 21975 21185 22459 21224 22240 21605 22151 21826 21900 21478 21765 21945 21743 21652 21765 22044 21949 21659 21942 21680 22508 21314 22064 21223 22483 21287 22136 21405 22246 21866 22070 21495 21716 21910 21917 21608 21652 21585 22332 21412 22033 21195 22417 21369 22097 21448 21920 21984 21781 21648 21711 21984 21805 21732 21765 21657 22308 21466 21811 21012 22729 21404 21686 21543 21274 22642 21097 22081 21484 22056 22445 21192 21892 20736 22746 21320 21899 21464 21395 22731 21112 22059 21512 22059 21983 21636 21760 20951 22343 21789 21817 21877 21440 51 18813 20499 20388 21157 20557 20864 20684 20728 21088 26060 22324 21736 21751 22256 29 20387 20727 21859 20838 21578 21270 21531 21603 21127 27673 22513 21504 22305 21408 22050 19435 21828 20948 21840 21176 21472 21673 21498 21376 32256 22191 22304 21809 22093 21575 20172 20678 21879 21200 22193 21317 21975 21338 21739 21787 22552 21752 21760 22075 22056 18165 21639 21064 22375 21121 22039 21084 22222 21435 22167 22338 21997 22093 21736 21811 21772 21668 22332 21413 22076 21586 22131 21810 21882 21662 21539 22120 21708 21746 21846 21069 22624 21138 22129 21109 22369 21762 21622 21639 21157 22705 21067 22044 21448 21912 22889 20948 22135 21224 22276 21972 21664 21513 21379 22692 21166 21874 21380 22242 21992 21643 21561 21616 21988 21861 21812 22128 21517 22252 21556 21902 21388 22140 21658 21808 21643 21481 22055 21754 21653 21849 21299 22465 21497 22008 21575 22089 21912 21885 21505 21634 21669 22377 21452 22086 21594 22060 21911 21789 21608 21834 21841 22171 21472 22060 21209 22359 21783 21783 21633 21862 21633 22329 21357 22088 21332 22221 21814 21828 21581 22081 21526 22373 21406 
39448 34048 40924 38144 35906 41808 36381 40103 38514 34848 41878 33280 38584 36320 36876 39856 37240 35058 43456 39914 42729 36603 38792 42633 38241 35847 39395 34951 36432 41931 34594 41459 41286 37505 43632 41162 38508 42715 35025 41296 36563 36411 40449 36725 37062 38599 39192 37597 39828 35085 36120 42510 40343 41394 39299 37902 37016 38564 41670 36471 41881 39034 39102 42004 39351 43027 37879 36585 39095 35833 32660 35194 34824 39401 36065 36712 38209 34851 41226 33454 35241 39256 39616 41402 40884 39728 33234 36408 36561 40588 34531 36576 41756 34569 40882 38922 38627 33425 36176 38754 41260 35926 32889 39724 36012 38944 33585 38791 41256 38612 36160 43895 36849 34356 40166 34492 37041 33377 39830 34224 36134 35240 37932 36372 34844 36568 38712 34641 35359 36616 37944 35427 36466 37840 36562 35352 35544 34295 38500 35162 34459 34803 38579 35997 33431 33944 38091 35716 32760 34268 38017 35819 33961 34480 37936 35428 34709 33642 37913 36317 33457 36130 36955 37276 43051 37404 37320 36336 33456 35307 37640 35553 35030 34224 37552 36998 32593 37810 36096 37321 42792 35988 37380 36800 31762 37098 34202 36082 34318 40133 40072 37930 38790 41597 42376 35435 37228 42537 41069 38466 40400 43591 32916 37655 40056 43120 33321 36749 37299 36501 41696 36064 42304 42647 34794 41053 38482 35179 37424 40530 43534 39351 37735 38256 33933 38420 37069 38190 36012 40588 34533 34343 40566 37426 40116 39154 39888 35264 36409 33929 38256 35984 35917 37851 35178 37719 36162 39620 33997 36330 35979 39399 35108 36009 42960 39680 34097 34216 34257 38160 37088 34116 33936 37068 38060 33548 39426 34103 38586 42336 41655 42008 39915 40304 43396 41315 38765 41013 43872 41133 38577 41670 42120 33270 38952 33721 40289 34373 38536 36800 37321 34304 35165 37879 36360 34050 36361 38241 35776 33392 34720 38745 36478 33528 34408 35952 38456 42792 38000 35602 40655 32972 38080 34881 40499 33136 41874 41740 39773 40337 43136 41455 38636 40435 43752 40461 38512 40552 42957 42744 37124 42320 42352 35429 37120 35458 37000 35405 36422 36540 35161 37719 40036 43883 38960 36999 39035 34003 39972 42948 38352 35853 39736 32704 39224 33098 40192 41621 35547 38451 40125 37355 37622 36224 35626 37578 37248 39691 36081 35592 39585 36848 33542 39013 36044 18296 35377 34801 33552 35757 33239 38987 35987 37336 35856 44104 42555 33164 36811 36784 36514 34689 39360 34807 34727 35735 37203 38274 33024 38342 35303 39973 33831 41353 42761 40591 40345 42839 41028 40544 39469 43840 40150 38480 40088 42279 33880 37879 42784 41123 42866 38880 43254 40936 34407 36805 37177 36513 33519 34145 38560 35606 34532 35271 37692 35913 33418 34960 38260 38711 42742 40112 34564 40088 42616 41825 43024 39477 40128 41197 32811 38661 39666 42856 42944 37260 41788 42282 33332 37447 34304 39562 36737 36384 38195 34832 36059 33199 41835 42018 36719 37651 34784 39958 35456 38249 36064 38538 35020 39072 33719 33899 34352 42379 40485 38572 37068 41303 42850 40885 39847 37101 37699 38798 36345 37484 37972 35190 37735 36133 39002 34229 42125 33174 37760 41223 41411 33799 37074 42792 39472 37048 37585 38498 34851 35622 35103 39210 34756 36018 34061 38065 37392 38257 40400 33152 38912 40040 43545 42315 37552 34243 41089 33595 38007 35041 38454 34447 36336 38200 36572 33137 34720 37888 35968 33221 35763 37504 37813 43041 38923 35024 39568 42865 40256 35105 40855 42675 40202 35201 41112 34581 41084 41048 40109 41430 42828 35883 35788 31752 37376 36722 32896 37431 38308 39536 38329 42821 39468 36326 34904 39785 36458 34931 34236 38569 35648 33605 34953 36032 39075 36935 40199 42768 39356 37926 36406 37736 36629 39872 43631 34394 35888 42683 39907 36476 39332 34343 32854 34647 40054 40896 38117 41576 35808 37896 39904 35680 36412 39339 35485 38192 35004 39360 40868 43072 33488 36406 32635 38660 37106 35396 39781 34252 35241 35052 35875 39434 42149 42080 41761 38806 41663 40689 33372 37616 37384 37295 35397 34436 38496 38565 33161 40691 41891 38860 40241 41781 35290 39336 37440 38317 34205 35336 36269 39354 33376 42864 40843 37966 42740 39265 34877 34404 37754 39410 34592 39539 42577 40867 38422 33447 41884 36903 35360 36936 33658 34528 36432 40320 43143 43188 41449 38533 39861 42983 34972 37288 37319 35506 33575 35704 37461 38646 33275 42880 42136 37847 35328 36730 35845 34304 40282 34585 33803 34983 35873 41216 37972 37267 40552 34572 40839 33254 38148 38651 34360 42259 37456 41432 37709 37825 39464 41415 39504 39779 35529 39354 34893 35712 34354 37907 33184 38761 36800 32599 41687 43010 35816 35938 37880 36576 32716 38680 38742 34656 40096 43185 33728 34485 36198 32907 42233 37376 34823 41858 40420 39774 39982 34000 40983 37217 35151 38446 39352 32974 42244 40474 38408 35188 37040 33553 35888 35912 39844 42443 42011 41642 38534 33488 41623 35983 35712 38672 38592 41638 43680 42304 37768 37440 35555 32975 38426 42327 39850 40688 41347 35147 34160 37685 40149 42765 43077 33328 39588 36949 35328 34064 38385 33271 39478 39531 41437 35920 34032 39030 39480 35202 43520 42368 38481 37931 33024 35400 34226 41368 40345 36053 42368 37168 40776 35846 32944 42752 36864 37280 33797 40528 41947 38512 38647 40312 39115 38131 37011 33411 32711 40288 42788 36702 34311 39080 37124 32930 40736 36058 35176 39469 33421 37146 42486 38999 36490 36364 39328 36728 34008 38785 42055 38317 42240 40871 36388 34007 37937 37992 42579 43600 41572 38000 41290 41153 34603 34432 36888 39216 42785 43827 42093 38018 37347 35384 33220 38201 42849 39879 40641 43440 42295 40484 36684 35662 33384 40151 41552 39624 41585 41384 35411 35300 37542 39570 40225 43931 42130 43393 38301 35631 33077 39364 42640 40201 40599 42906 33639 39353 38484 35203 32954 37312 34387 40091 40641 42923 33323 35428 39968 33283 37220 41095 34487 38228 36960 36771 41520 34405 42523 38120 42724 36949 39481 39494 42135 36855 37865 36994 35772 33773 38293 39268 35352 36263 42439 42475 34754 35214 37093 38499 37505 35098 41783 33472 37176 36359 35458 35302 33974 37335 39105 41660 42912 42547 37710 35915 37825 35788 34513 39565 38392 40966 42882 42062 39247 43083 40112 35712 36281 38504 36903 32934 37136 34968 40860 40320 44231 41282 38533 34824 37785 35984 35269 37856 37888 33317 40221 41433 41548 40288 40304 34896 36295 38690 36441 41322 41288 34991 40713 39469 33340 42091 41568 37101 36060 33736 36792 35472 39782 40145 43385 33453 37094 38063 37000 35532 35520 38807 36498 33396 41392 41514 39088 41360 42754 35020 36297 38330 35220 34634 41156 41473 35846 41520 34803 36962 38436 35601 35605 42592 35392 41260 39512 39264 40071 34665 34201 38763 33980 36128 38720 40416 41974 36585 33188 34262 38208 36379 40947 41330 33560 37408 36845 35328 37137 43082 40044 37491 34419 40017 42282 38107 41063 42823 33207 37094 35939 36552 35341 33174 38147 37146 36659 42048 42228 39351 41057 40924 34528 38260 39041 36034 33328 39274 41675 40546 40663 43031 34765 38281 38232 36800 32584 37751 35081 39708 41614 43808 42823 37836 35431 36275 34216 33899 37833 37431 43120 41120 42257 39853 39979 42190 35275 38069 38845 35552 42039 39681 41613 40736 40315 43868 40386 38645 41716 41557 34236 38724 38608 35757 34188 35052 37174 37504 33353 42588 42381 37964 34643 36756 35155 36608 38471 37014 34236 35913 37425 39417 39532 36263 38944 37091 41572 41448 42569 35899 40937 41422 37571 38199 34631 35547 40289 33809 39252 39521 36843 35288 42853 35889 37906 35380 38551 39061 35994 40376 35264 34391 38384 37424 36121 39000 35116 34624 35024 38116 38632 34229 40704 42887 36008 42743 40852 36114 36402 36704 37003 36328 34240 39168 35404 34449 33306 38871 36586 33730 38530 34269 40864 42248 42328 42730 39355 41325 43312 43137 40551 36683 36148 33624 34103 37632 38376 37498 40297 43159 40496 40112 43199 40432 38809 40421 41965 34081 37729 37018 36108 35680 34235 38360 39095 43032 38784 33067 39552 43162 41285 40576 40678 38976 43936 41931 39488 33143 39602 35648 35270 39218 35244 34023 35092 39897 35872 33036 35533 37058 39142 42229 42417 42624 40184 39408 34389 41845 38858 37129 35625 42336 36978 38522 40448 39060 39408 35737 41288 33259 38881 34360 40690 36104 37536 36788 35096 41347 40571 36795 34121 33538 38479 37605 40438 41798 37047 35775 38482 34311 36519 34542 39730 34005 36720 41930 35084 34359 32605 33942 37225 32054 37288 37205 41892 40540 38785 35812 34380 37128 37392 36141 35431 34983 38432 36017 32528 34208 37744 38550 33110 39356 18313 38449 35491 33134 34680 33896 33427 36466 31991 41058 41945 37540 33209 37768 34097 42485 41639 40005 42657 42768 42732 38647 43149 41639 43119 37591 35107 37875 39529 43266 42470 32995 40652 34432 32715 32973 41285 34867 41416 36839 35996 34304 39332 36624 34932 34841 38825 35848 34048 33271 37668 36753 33456 35335 39984 43020 40635 34716 34832 36246 42645 38248 41356 40689 37922 36011 41536 41928 40705 43596 41924 41047 39603 43410 41936 40722 41358 34237 41928 41317 42496 37671 39302 38565 40544 43809 33718 36492 35286 37049 36130 37136 37784 36336 40320 35928 37833 36608 40064 36601 37147 34807 42400 42560 38377 40582 42680 42192 39437 41728 41942 41504 39888 42632 41579 34689 38927 42137 38959 35060 39061 33360 38554 35621 39218 33097 38025 37664 37064 42832 35031 38202 36180 34669 34487 38061 36006 35008 35125 38266 38961 33104 39567 42603 42536 33232 38043 40777 44278 41356 39620 39578 42420 40754 38769 39624 33572 40624 40293 39345 43222 40736 41197 42873 42272 34518 39072 33485 36601 38311 35877 32855 33568 38924 35616 35242 35933 37313 36395 34528 36541 36384 38563 34359 38114 41447 34292 39072 38640 35427 37296 37396 40960 36704 35586 38952 40492 39392 40216 38813 37909 33473 34147 41350 33329 33930 40064 35543 40251 37367 37159 42344 35749 36888 42392 42967 38920 36024 34313 42472 39285 34570 34971 35653 37378 38153 34484 36205 41912 42409 42532 38336 42721 41627 34109 38060 33257 36811 38480 33764 35433 33784 38938 35781 34867 37878 37792 37649 35818 36870 35394 39503 34512 36473 41067 43520 40453 38640 39299 34000 39810 39479 40406 43704 41857 40272 34480 40465 33122 40075 38492 39345 35751 39392 42842 38556 35360 37357 42250 39367 36437 36228 42669 35670 38278 35593 32730 34849 38071 34803 35381 36691 36245 37480 34566 36822 35602 39851 34042 36963 41349 43227 40912 40299 40568 43008 42648 40276 33591 39191 35380 37888 42756 35979 39767 35145 33789 39604 43084 37812 33824 35603 34324 34310 40628 37084 37313 38128 37579 40745 39125 39157 38272 34426 42424 40983 36823 39232 38193 40448 35724 39456 39413 41051 40432 34966 37094 38121 34027 40168 34678 35753 35328 39552 36125 37048 35960 35132 41280 34060 36785 41564 43020 42409 38528 42338 41462 33814 38276 34408 40236 34731 38380 33102 35957 37529 38308 34373 33863 39576 35704 35506 37474 35735 39635 42757 38608 39712 43532 40448 41052 34326 39975 36587 37304 42797 36035 37893 35961 34454 35700 38821 38160 34817 37797 34775 43721 41216 39138 40406 43700 41139 40096 42244 41385 37260 39196 43208 35590 37392 37686 34098 34432 33627 41793 42160 38892 40059 42824 42000 39636 42472 37621 38216 36060 34304 35392 38092 36470 35481 35748 34585 41437 42852 36653 37699 35920 41910 35234 33344 40344 35008 38771 39295 43048 39180 43365 40010 37293 34560 35962 40976 37560 42575 42069 36256 38880 39256 32916 38944 38657 34335 35427 37299 42133 36463 36440 37192 42112 18668 34336 31894 41328 39623 33065 35802 34261 34649 38556 40705 41928 35799 35880 41062 18420 40739 35124 36879 36000 33696 40300 33417 33916 39002 37509 43816 32917 41332 41985 38925 41941 36683 37131 36527 39584 42615 35151 42896 41675 45728 41151 41664 36460 39563 33914 39417 34314 37196 39764 40576 41256 38512 41409 35975 36164 33557 35625 35511 39289 39042 38519 34592 38210 42592 39171 39003 38796 41043 42635 40577 42068 38848 39663 35695 36316 35888 34626 41842 42283 39537 33896 39760 36405 37179 34839 33128 39529 35421 35606 36738 38573 34581 38972 39906 39148 42355 35910 34276 34388 39303 35621 38496 38954 42448 37613 37716 37158 40087 40289 41288 38343 34595 32804 41366 35542 39569 37175 41557 41200 38592 34620 33470 33914 38165 37062 36296 39604 33178 41082 33603 37306 41771 40277 34822 36053 34519 42674 39356 36017 34548 36755 40834 43416 43377 38871 33911 39260 37512 37430 32727 34021 34650 42360 42752 39633 34112 38928 37674 36240 34037 36517 36612 40382 42658 39360 40167 42485 36387 36080 34193 36896 34208 41798 41869 39537 41303 41152 36628 36452 33891 39065 33157 42240 42313 
23306 24077 23472 23872 23609 24427 23904 24519 23738 24325 23516 23792 23236 23911 23544 24056 23651 23746 23467 23556 23207 23803 23660 24381 24039 24045 23356 23635 23449 23976 23576 23729 23462 23758 23127 23653 23117 23904 24045 24788 24139 23877 23207 23156 23303 23916 24000 23752 23318 23229 22839 23190 23207 23808 24349 24613 24541 23725 22912 23062 23494 23892 23788 23712 23431 23366 23089 22816 23296 23645 24080 23830 23867 23414 23343 23267 23630 23861 23681 23483 23805 23643 23427 23203 23323 23549 23959 23929 24179 23526 23664 23153 23695 23538 23861 23223 23687 23010 23493 23359 24186 23793 24180 23567 23739 23160 23770 23439 23977 23418 23779 22954 23664 23379 24224 23833 23884 23219 23559 23560 23919 23537 23927 23254 23456 23192 24311 23741 24129 23217 23629 23384 24029 23377 23724 23186 23382 23454 24215 23681 23931 22991 23955 23417 23769 23351 23509 22863 23919 23115 23348 23557 23444 23229 23176 23577 23445 23113 23376 23444 23600 23072 23442 23428 23699 23185 23436 23530 23466 23127 23303 23635 23490 23071 23479 23505 23718 22965 23528 23480 23540 23035 23453 57 50 4277 7017 7973 9863 9749 11102 10352 11110 43641 33415 28432 27023 25917 26387 25223 25369 24732 25328 24441 24673 24128 24887 24112 24461 23902 24813 23978 24449 24320 24217 24393 23897 24599 23541 24173 23288 24899 23312 23852 23232 24805 23300 23834 23402 24435 23882 23803 24157 23787 24091 23450 23836 24027 23776 23767 23794 23782 23497 23592 23849 23474 23578 23351 24011 23461 23497 23462 23879 23440 23424 23346 23776 23527 23335 23644 23570 23680 23173 23729 23284 23847 23219 23931 23075 23782 23072 24136 22960 23699 22986 23978 23164 23639 22928 24064 23123 23647 23263 23985 23303 24121 23448 23749 23439 23655 23628 23582 23382 23517 23602 23536 23304 23392 23705 23582 23143 23611 23638 23605 23168 23703 23395 23828 23366 23876 23117 23844 23478 23922 23095 23883 23005 24021 23127 23732 22903 24103 23079 23661 22963 24074 23191 23521 23143 23906 23352 23535 23324 23533 23432 23484 23472 23495 23509 23342 23963 23002 23556 22867 24303 22948 23308 23040 23907 23557 23030 24183 23080 23820 23036 24292 22828 23779 22771 24425 22682 23591 22667 24368 23041 23436 22889 23968 23426 23136 23559 23362 23716 23339 23856 46 9168 11505 13829 13527 14034 14292 14680 14607 15322 33710 28503 26511 25801 25612 25016 24684 24551 24833 24508 24096 24513 24131 24476 23610 24530 23791 24358 23543 24613 23556 24247 23283 24561 23432 24136 23273 24510 23401 23961 23541 24283 23574 23661 23511 24157 23561 23928 23636 23812 23554 23744 23836 23817 23504 23591 23908 23712 23441 23592 23732 23720 23391 23820 23415 24005 23287 23986 23264 23962 23214 24189 23152 23856 23208 24146 23165 23784 23207 24057 23399 23732 23386 23833 23466 23676 23674 23559 23458 23372 23826 23453 23544 23058 24262 23209 23534 23123 24180 23210 23413 22993 24286 23239 23337 23354 23944 23495 23498 23890 23430 23849 23152 24459 22922 23873 22668 24513 22848 23639 22900 24094 23610 23379 23861 23219 23719 23205 23992 23127 23547 23119 23956 23315 23541 23641 23513 23446 23411 23704 23410 23447 23258 23752 23442 23317 23573 23479 23726 23080 24003 23004 23688 23047 23954 23281 24121 23239 23856 23319 23671 23521 23532 23189 23439 23584 23539 23095 23681 23453 23580 23173 23605 23369 23757 23343 23895 23241 23797 23144 23970 23066 23845 23180 23925 23054 23762 23001 24020 23010 23789 23 13807 15192 16320 16019 17230 16790 17244 17057 17510 33527 26685 25783 25054 24681 24362 24622 24259 23919 24296 24231 24089 23719 24339 23788 24207 23397 24568 23312 24032 22914 24519 23446 23639 23685 23826 23943 23047 24583 23256 23517 23435 23904 23911 23215 23976 23363 24082 22872 24626 22848 23682 22981 24068 23633 23186 24002 23203 23784 23260 23988 23481 23616 23616 23552 23591 23282 23815 23591 22856 23847 23161 23744 22924 24101 23171 23634 23434 23853 23426 23493 23715 23462 23272 23663 23256 23814 23121 24116 23093 23617 23267 23648 23390 23416 23604 23529 23044 23831 23140 23826 22840 24103 23203 23744 23563 23400 23247 23525 23345 23855 23156 24079 22931 23689 23031 23892 23383 23570 23627 23480 23223 23785 23095 23787 22811 24071 23206 23571 23320 23561 23394 23343 23696 23431 23176 23790 23149 23684 22948 24023 23266 23654 23552 23315 23275 23283 23737 23531 23354 24137 22789 23545 22958 23889 23568 23015 24008 22791 23431 23258 23676 23831 22876 24416 22921 23130 23796 22896 23585 22636 24174 23413 23287 24088 23109 23244 23511 23335 23687 22933 23844 23392 23285 23656 23268 23265 23521 23160 23680 22971 24022 15860 18279 18647 18918 18916 19028 19324 19798 18931 43640 25883 25079 24490 24156 23971 24047 23746 24237 23140 24356 23502 23956 23814 23748 23362 24039 23279 23948 23052 24160 23398 24228 23498 23703 23284 23713 23354 24002 22872 24026 23450 23400 23790 23889 23296 24189 23163 23701 23472 23599 23170 23859 23098 23788 23101 23794 23424 23447 23689 23647 23072 23975 23048 23616 23376 23520 23268 23560 23151 23704 22739 23851 23412 23320 24194 23304 23348 24407 22713 23443 23633 23148 23645 23096 23511 23908 22655 24344 23591 22942 24329 22941 23271 23872 22932 23612 23019 23451 23799 22994 23915 23285 23679 23578 23277 23385 23204 23601 23641 23065 23977 23083 23522 23508 23447 23332 23385 23389 23719 23163 23975 23117 23633 23415 23379 23186 23517 23253 23772 22859 24023 23118 23584 23317 23464 23118 23574 23057 23819 22760 23944 23272 23404 23524 23664 23040 24041 22940 23696 22903 23828 23279 23340 23577 23676 23060 24043 23116 23563 23336 23488 23229 23625 23080 23762 22788 23910 23269 23350 23557 23606 23264 24034 22914 23654 23107 23615 23425 23325 23564 23580 23424 23936 22976 23472 23047 23553 23541 22992 24092 23008 14789 20993 20338 21441 20567 21365 21690 20659 22158 21300 24821 24487 23468 24209 22853 24512 23348 23488 24389 22925 23563 23383 23453 23847 23162 23867 23491 23165 23576 23360 23634 23024 23937 23400 23478 23760 23455 23242 23848 23020 23752 22944 23939 23383 23585 23604 23324 23233 23584 23201 23767 22892 23985 23225 23926 23536 23370 23269 23308 23511 23698 23137 23770 23027 23733 22784 24045 23201 23759 23476 23417 23213 23521 23344 23723 22953 24084 22952 23604 23362 23584 23224 23384 23380 23751 23084 23973 22870 23561 23024 23923 23209 23424 23592 23603 23130 23910 22934 23616 22967 23778 23319 23408 23631 23353 23204 23412 23393 23667 22945 24034 22999 23537 23237 23529 23403 23281 23744 23485 23247 23503 23351 23797 22704 24492 22737 23436 23111 23656 23720 22944 24252 22739 23381 23129 23395 23719 22848 24438 22808 23213 23616 23189 23665 22848 24341 23076 23343 23217 23675 23343 23316 23678 23237 23280 23386 23432 23616 23121 23942 23161 23552 22955 23745 23424 23371 23685 23266 23188 23434 23441 23703 22917 23927 23068 23506 23266 23558 23273 23233 23516 23638 23010 24049 22937 23576 23080 23544 23264 23248 23552 23559 23097 23829 22967 23655 22912 23945 23260 23568 23412 23361 23127 23443 23458 23780 22908 23992 22905 23570 23296 23623 23286 23128 23429 23643 22988 24064 22926 23797 22850 24045 23084 23604 23242 23515 23309 23319 23629 23388 23141 23565 23180 23708 22832 23911 23223 23421 23561 23372 23298 23197 23552 23680 23209 23872 23116 23668 22615 24217 23190 23453 23233 23625 23623 22891 24237 22753 23287 23388 23528 23799 22807 24402 22606 23366 23229 23559 23709 23249 23975 22798 23479 22830 24027 23347 23535 23525 23257 23315 23140 23702 23377 23185 23765 23114 23606 22972 23868 23150 23425 23329 23514 23329 23346 23596 23260 23308 23248 23664 23334 23183 23377 23461 23681 22987 23793 22977 23648 22825 24004 22967 23584 23159 23588 23313 23340 23524 23498 22969 23585 23219 23798 23020 23942 22912 23604 22775 24116 23027 23575 23282 23573 23217 23357 23557 23408 23074 23478 23298 23584 23031 23987 22986 23721 22912 24068 22938 23722 22879 23893 23171 24088 23320 23507 23287 23186 23580 23548 23132 23322 23541 23541 23164 23597 23187 23750 22921 24011 22952 23500 22772 23863 23006 23436 23001 23685 23456 23058 24167 22749 23284 22941 23828 23524 22904 24169 22628 23557 22594 24283 23268 23392 23718 23127 23649 22816 24273 22967 23206 23536 23355 23399 23288 23684 23268 23346 23132 23771 23319 49 42 4263 7069 7867 9605 9208 9751 9964 10462 43637 33898 29701 27585 26811 26270 26328 25644 25321 25236 25376 25158 24704 25094 24683 25072 24308 55 10232 13993 13559 15028 14151 15139 14372 15422 14510 35436 29112 28148 26720 26368 25797 26405 25316 25591 25029 25591 24890 25284 24640 25136 24704 24914 13124 16407 16664 17265 17657 17862 17647 17881 18186 43630 28672 26887 26504 25795 25372 25223 25331 25064 24771 24559 24951 24704 24375 24611 24580 24540 24178 18649 19238 19849 19448 20274 19801 20464 19629 21003 29146 26666 24881 25997 24192 25275 24087 25455 23825 24807 23923 25177 23692 24603 23528 25098 23580 16723 20724 22461 21134 22108 21166 22392 21724 21800 21850 25440 24787 24292 24301 24229 24390 24109 24278 24047 24235 23969 24098 23558 24496 23585 24060 23368 24499 23445 24071 23358 24385 23414 24177 23412 24221 23624 24147 23646 24162 23552 24160 23656 24057 23603 24042 23781 23808 23782 23895 23374 23640 23808 23746 23489 23641 23874 23670 23564 23732 23735 23982 23586 23552 23520 24200 23406 23879 23168 24259 23194 23790 23154 24370 23205 23995 22997 24193 23154 23918 22976 24278 23165 24021 23335 24024 23477 23854 23332 23586 23783 23703 23408 23438 23856 23523 23481 23590 23703 23598 23604 23624 23525 23852 23497 23637 23068 24453 23136 23738 22791 24666 22726 23791 22870 24520 22876 24068 23343 23984 23613 23767 23849 23672 23956 23527 23390 23201 24380 23032 23760 23065 23984 23383 23610 23655 23479 23599 23495 23335 23278 23820 23513 23527 23474 23620 23835 23427 23608 23066 23950 23022 23760 23093 24002 23449 23796 23232 23374 23831 23514 23230 23317 23712 23514 23393 23463 23532 23565 23541 23509 23651 23860 23215 23616 22992 24130 23045 23716 22798 24197 22940 23748 22874 24135 23163 23808 23028 24004 23205 23862 22800 23860 23206 23862 23595 23904 23444 23817 23552 23744 23696 23616 23199 23425 23711 23567 23222 23356 23729 23579 23361 23604 23587 23601 23395 23526 23447 23836 23298 23648 23271 24090 23017 23735 23052 24020 23182 23728 23181 23818 23426 23731 23236 23351 23817 23193 23469 23096 23802 23728 23473 23120 23297 24248 23077 23484 22696 24493 22633 23939 23049 23769 23661 23557 23226 22936 24399 22930 23556 22744 24311 22775 23696 23144 23724 23280 23546 23221 23236 23701 23268 23423 23369 23765 23404 23484 23565 23261 23798 23093 23559 22912 24009 23090 23742 23080 23916 23187 23683 23260 23781 23312 23766 23157 23680 23533 23463 23216 23217 23633 23372 23330 23477 23315 23890 23042 23608 22877 24035 22914 23792 23187 23659 23410 23655 23169 23371 23645 23486 23303 23443 23577 23591 23238 23734 23041 24105 22957 23829 22812 24023 23043 23795 23172 23756 23342 23553 23175 23524 23496 23544 23363 23781 23169 23945 23061 23580 22961 24011 23203 23708 23163 23426 23687 23241 23329 23253 23561 23581 23383 23015 23143 23887 23119 23652 22648 23904 23644 23369 23217 22872 24360 22761 23641 23162 23263 24150 22748 23655 22752 24134 23429 23520 23158 22839 24320 22806 23680 23104 23728 23835 22760 23716 23279 23558 23531 23349 23400 49 5073 7303 9769 9625 10628 10527 10966 10915 43631 37845 31416 28389 27504 26570 3015 11953 14081 13984 15425 14817 15702 15177 15385 15647 36470 30352 28537 27218 27581 1302 16948 16862 18397 17680 18423 17913 18359 18548 18451 33425 28638 27515 27147 26236 26221 18724 20564 19692 20722 19985 20985 20273 20869 20265 31545 27398 26351 25764 25665 25504 21916 21911 22477 21851 23008 21895 22753 21997 22886 22132 25959 24934 24939 25114 24756 24759 25169 24449 25173 24261 24868 24470 24782 24601 24487 24295 24130 24656 24491 24220 24512 23692 25197 23663 24571 23762 24663 24536 23948 24001 23540 25096 23533 24375 23812 23389 25018 23380 24423 23702 24423 24328 23950 23764 23483 24929 23360 24260 23692 24264 24178 23797 23847 23847 24197 23908 23911 23979 23620 24344 23552 23975 23573 24263 23808 23879 23735 23635 24000 24102 23676 23881 23266 24361 23432 24119 23693 24040 23942 23820 23670 24406 23434 24539 23377 24176 23429 24037 24002 23882 23736 23932 23689 24421 23352 24124 23332 24087 23927 23760 23696 23681 23438 24455 23303 24147 23510 23958 23820 23789 23672 24355 23355 24428 
22020 21696 23072 22107 22152 22073 22236 22182 22480 22436 22387 22112 22467 22058 21787 22088 22427 22595 22881 22461 22513 21932 22288 21816 22740 22336 22307 21996 22428 21656 22290 22240 22977 22662 22824 21930 22316 21916 22391 22145 22651 22016 22624 21968 22507 21545 22709 22133 23258 22471 22765 21949 22305 21589 22550 21989 22886 21912 22576 21689 22347 21631 22924 22188 23160 22383 22990 22039 22343 21697 22444 21969 22804 21829 22797 21848 22419 21309 22688 22211 23018 22345 23194 22594 22724 21779 22498 21967 22919 21998 22576 22010 22296 21716 22658 22267 23028 22108 22561 21827 22393 21862 22749 22007 22599 21865 22140 21100 22159 22634 23744 22690 22005 21097 22086 22395 22843 21861 22198 21331 21670 22112 23474 23143 22892 21476 21762 22130 22946 22065 22453 21284 21760 22464 23399 22896 22272 22007 22163 22711 22189 22499 21848 21905 22351 22688 22489 22301 21965 22223 22397 22528 22473 21952 21964 22679 22531 22708 21792 22307 22305 22373 21831 22083 21789 22852 22422 22510 21703 22587 22147 22624 21904 22101 22187 23006 22299 22430 21653 22714 21757 22552 21509 22532 22425 23026 94 93 91 84 3073 5475 7186 43609 43658 43630 39873 33856 30498 28673 27473 26393 25552 25273 25144 24519 24130 24004 24246 23815 23389 23611 23528 23574 22840 23426 23152 23485 22637 23513 22679 23411 22503 23849 22356 23460 22449 23756 22204 23522 22017 23895 22295 23179 22173 23552 22149 23073 22040 23599 22045 22941 21214 22844 21927 22732 22059 23017 22312 22787 22309 22786 22304 22624 22425 22701 22272 22510 22585 22393 22081 22310 22596 22512 22057 22243 22414 22684 21985 22715 22401 22817 21909 23213 21783 22816 21368 23712 21587 22987 21335 23784 21444 23084 21486 23831 21562 22681 21661 23229 22137 22909 22167 22950 22244 22485 22199 22578 22674 22193 23121 21732 22631 21901 23042 21933 22580 21815 22839 22252 22365 21913 22904 22176 22302 22135 22832 22225 22682 22357 22715 22387 22358 22547 22507 22363 22309 22707 22169 22216 22153 22545 22377 21989 22423 22407 22473 22068 22357 22343 22720 21754 22958 21848 22913 21709 23228 21675 22855 21515 23084 21976 22753 21731 22995 21847 22768 22011 22805 22060 22642 22202 22580 22023 22274 22391 22574 22093 22149 22448 22476 21947 22551 22204 22592 127 107 90 3351 6336 10469 10868 12971 12779 43559 43654 43661 35703 31813 28345 27447 26003 25606 24698 24657 24448 24012 23509 23590 23783 23691 22984 23396 23403 23400 22318 24025 22947 23193 22243 23735 22308 23494 21942 24179 21697 23114 21601 24036 21498 23128 21644 23906 21798 22656 22241 22936 22552 22272 22786 22339 22819 22303 22868 22147 22891 22112 23077 22147 22519 22008 22973 22355 22396 22308 22824 22423 22360 22296 22807 22291 22673 22592 22343 22508 22122 22630 22286 22237 22389 22659 22432 22048 22744 22066 22704 21935 22950 22017 22823 21878 23117 21753 22837 21689 23155 21685 22907 21659 23133 21743 22851 21640 23165 21764 22635 21818 23210 21922 23220 22009 22663 22144 22454 22400 22451 22000 22343 22400 22520 21885 22736 22069 22950 21971 23057 21778 22871 21498 23208 21725 22631 21967 22804 22115 22884 22230 22575 22180 22392 22403 22307 21959 22429 22212 22639 21682 22961 21661 22748 21291 23324 21426 22798 21284 23345 21809 22893 22355 22105 22460 21941 23111 21721 22354 21608 23175 21664 22199 21660 23226 21856 22151 21589 23151 21845 21998 21488 23248 21741 22295 22061 22719 22152 21763 22307 151 115 4514 10553 12631 14407 15260 16656 16712 17207 43634 40486 31955 28384 26776 25107 25036 23796 24591 23257 23808 22807 23899 22771 23282 22444 23495 22679 23079 22796 22912 22496 22739 22801 22804 22105 23047 22345 23104 22011 23251 22004 22912 21851 23372 21957 22842 22067 22938 22164 22791 22512 22592 22036 22488 22374 22821 21638 23092 21757 22836 21455 23395 21733 22775 22007 22784 22132 22498 22446 22572 22018 22871 21984 22977 21793 23308 21971 22713 21782 23118 22151 22583 22469 22432 21905 22418 22238 22787 21619 23536 21382 22511 21841 23101 22122 22106 23247 21877 22048 22487 22165 22899 21063 23488 21730 22151 22920 21693 22233 21888 23085 22348 21969 23273 21691 22318 22045 22306 22490 22016 22875 22080 22249 22432 22220 22419 22049 22681 22203 21975 22472 22123 22571 21764 23019 21991 22349 22189 22283 22146 22121 22356 22592 22036 22834 21740 22696 21501 23002 21908 22685 22246 22442 21811 22488 22031 22630 21591 22979 21638 22612 21721 22838 22062 22319 22419 22637 22247 22868 21723 22787 21452 23184 21948 22662 22357 22381 21848 22683 21736 22970 21381 23162 21861 22537 22242 22371 21869 22647 22167 22710 170 12167 14475 17126 17686 18435 18526 19395 19160 43616 34067 29367 25491 24496 24104 23460 23172 23171 23152 23616 21725 23889 22809 22592 23700 22308 22141 22405 22626 23212 21386 23847 21673 22469 22919 21895 22227 22643 21893 22744 21658 22405 22610 21841 22887 22407 22251 22860 22301 22247 22791 22018 22357 22449 22243 22258 22180 22429 22560 21747 22959 22185 22656 22511 22318 22181 22876 21770 22539 22204 22451 22065 22533 22297 22745 21633 23069 21884 22627 22305 22555 21845 22896 21670 22557 21954 22520 22115 22352 21979 22881 21640 23108 21798 22720 22188 22371 22004 22615 21843 22804 21585 23123 21615 22857 22178 22397 21910 22311 22099 22801 21632 23021 21864 22553 21975 22474 21994 22279 22089 22790 21612 23200 21805 22651 22329 22346 21907 22464 21993 22824 21376 23532 21458 21618 22811 21623 21906 22729 21654 22734 21319 22984 22463 21573 23095 22152 21887 22936 21258 22438 21815 22403 22434 21457 23057 22341 22153 22703 22244 22528 22687 22009 22217 22383 21986 22220 22100 22120 22453 21693 22796 22295 22742 22531 22105 22263 22279 21947 22516 21666 22971 21904 22567 22418 22255 21884 22517 21942 22700 21616 8240 15527 18872 19491 20205 19927 21026 20409 21397 20203 31470 25205 24477 23205 23532 22768 22886 22719 23120 22087 23379 21876 22903 21921 22898 22249 22419 22466 22624 21860 22896 21885 23003 21505 23022 22109 22384 22497 22503 22016 22888 21798 22805 21508 23143 21959 22634 22393 22421 21895 22497 21878 22841 21513 23136 21785 22584 22137 22327 22304 21673 23140 21942 21788 22810 21676 22852 21109 23473 21650 22085 22733 21799 22350 21738 22820 22620 21740 23544 21447 22253 22370 21945 22333 21632 22826 22139 22859 22537 22105 22193 22263 22327 22380 21884 22823 22051 22401 22515 22042 22139 22126 22471 22391 22235 22874 21777 22381 21875 22610 22153 22345 22421 22184 21993 22490 21976 22696 21581 23042 21657 22583 21808 22779 22032 22497 22288 22377 21810 22491 22070 22663 21792 23005 21611 22550 21691 22751 22068 22377 22275 22443 21688 22711 21933 22845 21568 23220 21623 22577 21569 22946 21789 22615 22300 22467 21751 22420 22011 22771 21661 22861 21719 22519 21649 22840 22036 22368 22524 22224 21907 22385 22045 22784 21576 23085 21582 22562 22054 22421 22009 21994 22569 22624 21621 23415 21395 22507 21880 22416 22395 21726 23146 21928 21798 22896 21310 22615 21136 23238 22040 22055 22538 21989 22358 21612 22934 22378 21585 23417 21261 22149 22323 22018 22467 21624 22736 22305 22365 22354 22360 22470 21925 22732 21987 22106 22312 22230 22564 21866 22885 21773 22417 22005 22177 22201 22151 22422 22584 21643 22560 21786 22544 21536 22948 21840 22451 22362 22328 22045 22128 22264 22332 21689 22509 21949 22745 21670 22919 21567 22528 21853 22824 21966 22341 22315 22380 21792 22746 22147 22710 21778 23025 21619 22727 21441 23058 21793 22528 22048 22472 21893 22430 22293 22431 21721 22777 21820 22794 21507 23079 21571 22416 21728 22844 21982 23056 22372 22748 22090 22491 22152 22333 22024 22218 22347 22373 21745 22716 21761 22711 21606 23460 21322 22488 21547 22920 22240 21920 22892 21695 22083 21628 22832 22201 21663 23150 21791 22841 21298 23588 21280 22328 21801 22663 22150 22066 22865 21551 22437 21793 22696 22140 22211 21837 22624 22279 22144 22601 21989 22305 21813 22711 22115 22087 22468 21960 22570 21689 22907 21714 22501 21687 22887 21767 22384 21961 22625 22065 22530 22240 22279 22112 22165 22376 22356 21838 22389 22083 22688 21847 22937 21552 22621 21354 23015 21923 22319 22293 22439 21901 22112 22249 22427 21668 22743 21853 22763 21546 23157 21701 22494 21733 22790 21979 22616 21841 22887 21909 22456 139 107 94 97 77 4004 5454 8812 8642 10649 43627 43659 43700 36759 31644 29607 27447 26805 25834 25367 24666 24349 24457 23792 23702 23166 24322 139 106 2075 9361 12041 13355 15863 15347 16491 43539 43671 42756 35315 29496 29592 25821 26394 24243 26156 23471 24564 23021 25147 22665 23559 23124 23729 129 5856 12212 15029 16634 17493 18400 18752 19245 43714 43683 32613 29172 26722 26304 24580 25096 23857 24395 23296 23902 22963 24082 22761 23550 22419 194 7813 14960 16588 19172 18782 19971 19527 20967 19990 43639 30834 27980 25355 25172 23986 24509 23401 23420 23360 23761 22787 23509 22719 23607 22565 23367 9095 17646 18863 20414 20321 21479 20712 21459 21045 22023 29603 26353 23545 24725 22894 23764 22352 23950 22229 23264 22115 23648 22200 23222 22355 23412 22253 23112 22113 23100 22319 23064 22129 22991 22504 22734 22103 22548 22943 22634 22286 22124 23168 22044 22424 21798 23394 22029 22531 22056 23040 22331 22528 22475 22720 22625 22228 22006 22215 23429 21595 22465 21280 23700 21434 22791 21357 23547 21511 22880 22152 22784 22353 22377 22292 22514 22232 22452 22316 22535 22439 22380 22231 22201 22697 22055 22485 21692 22975 21827 22584 21785 23097 22175 22727 21983 22601 22324 22560 21982 22409 22430 22313 22035 22233 22425 22337 22125 22254 22425 22574 22016 22563 22140 22752 22054 22854 21948 23127 21717 22633 21591 23207 21643 22699 21335 23060 21534 22896 21731 22791 22256 22690 21836 22350 22432 22318 22046 22284 22185 22542 22071 22775 21720 23109 21495 22875 21476 23088 21647 22864 21811 22665 22161 22631 22002 22193 22524 22396 22121 22422 22278 22556 22032 21928 21901 22979 21845 22599 21644 23145 21618 22609 21249 23473 21592 22901 21577 22969 21664 22739 21968 22983 21991 22333 21945 21790 22799 22016 22120 21831 23168 21629 22042 21509 23175 21596 22267 21453 23285 21594 22401 21992 22867 21871 22601 22192 22689 22177 22443 22141 22305 22478 22149 22107 22089 22567 22101 22119 22033 22529 22112 22187 22357 22103 22630 21961 22332 21831 23054 21810 22452 21554 22915 21740 22670 21767 22756 22211 22482 21965 22232 22386 22388 21876 22276 22241 22388 22028 22677 22146 22979 21607 22561 21537 23168 21498 22824 21657 22928 21819 22869 21612 22668 22272 22481 21801 22217 22400 22454 21961 22817 21803 23095 21820 22601 21391 23126 21574 22832 21676 22787 21949 22747 22231 22682 22069 22617 21833 22350 22222 22420 21867 22227 22377 22371 22007 22305 22155 22506 22118 22386 21441 23360 21349 22737 21316 23395 21536 22470 21762 21693 23084 21554 22235 21601 23181 21852 22411 22311 22181 22875 21783 22316 21381 23520 21323 22665 21691 22914 22423 22254 22208 21936 22874 21891 22402 21883 22497 22513 22208 22081 21935 22517 21962 22238 22153 22245 22464 22162 22355 21734 22843 21817 22538 21856 22481 22342 22561 21921 22176 22430 22221 22058 22265 22281 22552 21707 22567 21423 23051 21635 22807 21934 22490 22194 22231 21907 22369 22146 22635 21814 22547 21360 23113 21775 22856 21101 22532 22083 22377 21825 22452 22058 22855 21869 22485 21383 23131 112 102 191 1785 5525 8564 9503 11271 12305 43608 43650 43671 38825 34061 29270 157 50 8561 12214 15275 15891 17111 17785 18376 43562 43650 43664 36569 30507 29226 201 5029 13102 16072 17826 18207 20262 19443 20151 20260 43676 39153 30494 28712 25968 677 9535 16853 18547 19884 20985 20110 20813 20208 22087 42918 32548 28080 26625 25735 24873 15282 19136 21106 21175 21621 21841 21793 22185 21784 36705 27670 26390 24500 24644 23783 23586 23846 23500 23392 23269 22937 23846 22684 23386 22576 23546 22676 23418 22565 22685 23065 22856 22608 23051 22472 23367 22138 23093 21868 23567 22049 23148 21792 22749 22657 22680 22340 22695 22197 23309 21920 22889 21687 23406 21872 23072 22137 22866 22367 22666 22087 22725 22344 22984 22002 22848 21702 23417 21617 22982 21909 22886 22311 22583 21970 22437 22491 22699 21934 22720 21710 23184 22061 22823 21966 22489 22471 22467 22195 22434 21928 23249 21666 22993 21909 22472 23015 22207 22421 22614 21936 23527 21380 23003 21606 22709 23123 21877 22582 22820 21781 23673 21366 22829 21752 22146 23219 21712 22489 21584 21476 23691 21511 22772 
