# Supplementary material for: An Active Feature Selection Strategy for DWT in Artificial Taste
Source: Hindawi journal article supplement (doi:10.1155/2018/9709505), 2018-01-01
Supplement: f1 [file 9709505.f1.zip › puerTea-hi-3.txt]

43464 43468 43648 43472 55 51 17159 21063 20808 22167 21336 22885 21687 22840 21553 23178 21685 23097 21600 23517 21741 22984 21814 23379 21982 23040 21943 23388 22068 22952 22088 23303 22290 22997 22415 23147 22299 23024 22240 23249 22405 22765 22508 22956 22312 23012 22608 22985 22524 23109 22523 22861 22536 22936 22597 22983 22440 22953 22720 23032 22233 22868 22788 23042 22366 22872 22797 22880 22447 22848 22834 22833 22337 22776 22778 22984 22338 23089 22548 23145 22428 23424 22089 23222 22076 23494 22248 22915 22286 23244 22505 23287 22581 23105 22535 22646 22450 22992 22584 22707 22901 22537 22503 22334 23194 22720 22284 22994 22724 23100 22106 23832 21798 23024 21785 23652 22112 22580 22840 22417 22855 22106 23662 22192 22767 21947 23666 22260 22467 22571 22885 23072 22182 23656 21884 22930 21948 23591 22393 23029 23047 23121 22741 22648 23152 22588 23127 22180 23258 22368 23008 22215 23381 22413 22930 22497 23097 22511 23020 22658 22961 22720 22724 22829 22920 22721 22864 22871 22768 22687 22632 22907 22759 22540 22704 22901 22860 22499 22601 22951 22749 22407 22576 22920 54 13696 18460 19242 20209 18804 20324 19153 20312 19270 36292 24740 24000 22745 23988 22612 23625 22616 23744 22526 23488 22593 23693 22601 23401 22360 23463 22368 23367 22355 23558 22234 23504 22288 23498 22439 23387 22183 23480 22346 23274 22055 23307 22450 23203 22192 23274 22475 23247 22327 23152 22629 23136 22263 22814 22659 23138 22248 23052 22736 23124 22253 22887 22739 22983 22414 22774 22727 22912 22446 22806 22789 22919 22479 22901 22757 22950 22368 22893 22614 22946 22358 23248 22611 23143 22433 23355 22615 23063 22473 22895 22742 22984 22541 22899 22769 22864 22476 22834 22758 22856 22530 22713 22799 22850 22520 22714 22954 22798 22402 22673 22823 22823 22438 22869 22868 22947 22390 23025 22712 23087 22321 23172 22461 23127 22483 23260 22532 23148 22611 23300 22453 23085 22231 23534 22061 23180 21850 23824 21852 23100 21785 23856 21781 23194 21824 23899 21799 22946 21869 23738 22388 22624 22298 23193 22730 22583 22489 23045 22775 22607 23270 22480 22873 22035 23329 22272 22951 21946 23454 22224 22966 22061 23688 22096 22806 22050 23671 22169 22587 22286 23532 22152 22713 22288 23277 22568 22881 22720 22742 22671 22699 15289 19712 20687 21026 21241 21383 21041 21408 21414 43471 24968 23496 22893 23494 22784 23537 22636 23139 22472 23543 22529 23073 22437 23511 22502 23110 22717 23237 22784 23006 22904 23165 22608 22945 22829 23140 22677 22914 22784 22992 22643 23027 22749 22960 22629 22964 22809 22901 22504 23153 22752 22982 22552 22997 22815 22813 22444 22745 22857 22932 22325 22865 22791 23028 22311 22753 22822 23068 22289 23000 22639 23047 22258 23082 22541 23170 22199 22985 22434 23328 22329 23129 22491 23214 22643 23329 22313 23265 21970 23216 22356 23223 22097 23287 22440 23306 22116 23042 22704 22914 22272 22776 22696 22940 22264 22960 22828 22921 22221 22754 22621 22973 22437 22871 22676 23040 22414 22949 22650 22916 22391 22896 22644 22992 22433 23034 22636 23125 22382 22965 22554 23137 22441 23114 22577 23121 22371 23040 22225 23530 22108 23278 21880 23569 21956 23205 21925 23684 21992 23169 21890 23601 22016 23178 21910 23756 22332 23107 22373 23227 22505 23111 22281 22937 22672 22859 22413 22640 22828 22801 22502 22724 22514 23276 22273 22999 22072 23478 22107 23154 22329 23237 22453 22855 22471 22676 22889 22713 22568 23105 22370 13832 20608 21709 20877 22495 21179 22124 21193 22497 21364 25551 23104 23251 23120 22976 22859 23029 22381 23495 22396 23063 21861 23824 22217 23300 22412 23019 23460 22368 22679 22074 23318 22557 22880 22649 22574 23539 22213 22855 21911 23781 21880 23013 21690 23810 22112 23104 22519 22508 23406 22112 22788 22126 23344 22476 22857 22690 21893 23831 21835 23024 22068 23614 22257 23035 22390 22464 23672 22095 22912 22588 22626 23468 22224 22801 21720 23785 22001 23137 22240 23232 22951 22397 22868 22304 23296 22308 23019 22160 22903 22876 22763 22567 22641 22908 22912 22593 23134 22172 23310 22333 23065 22521 23096 22886 22914 22543 22476 22977 22859 22625 22528 22491 23355 22083 23052 22353 23168 22531 23025 22532 22744 22807 22777 22563 22962 22725 23254 22359 22983 22144 23511 22210 23048 22235 23036 22617 22704 22440 22888 22598 23110 22536 23031 21902 23517 22030 23296 22380 23213 22601 22951 22328 22754 22695 23123 22387 23010 22165 23437 22064 23179 21876 23536 22232 23156 22177 23080 22615 22952 22254 23061 22432 23257 22189 23100 21979 23589 22005 23297 22261 22897 22705 22879 22410 22898 22343 23457 22146 23117 21954 23447 20881 22357 21463 22165 22112 22408 21942 23171 21729 27994 22466 23541 22228 23423 22605 22991 22370 22840 22609 23353 22217 23066 22046 23280 22689 23050 22503 22978 22629 23439 21927 23266 22231 23104 22604 22882 22434 23184 22210 23510 21975 23239 22309 23021 22666 22808 22542 23122 22027 23432 22272 23119 22300 22637 22840 22978 22437 22880 22039 23356 22400 22951 22450 22681 22437 23407 22125 23095 22300 22849 22921 22795 22560 22900 21961 23395 22679 22708 22596 22673 22025 23461 22272 23085 22453 22309 22976 23238 22080 23051 22430 21983 23101 23202 21977 23069 22176 22354 23552 22389 22656 22896 22130 22756 23427 22008 22825 22630 21785 23763 22553 22477 22647 22217 22331 23785 21983 22995 22633 22214 22641 23586 21876 23016 22120 22314 23525 22628 22374 22827 22069 22774 23599 22135 22621 22848 22204 22605 23608 22247 22768 22523 22473 22811 23275 22201 23097 22451 22563 22874 23155 22363 22995 22464 22620 22919 22880 22484 22922 22437 22807 23104 22734 22591 22929 22465 22729 23033 22818 22451 22957 22212 22939 22855 22882 22405 22999 22360 22909 22931 23139 22157 23025 22435 22555 22681 23405 22210 23216 22432 22741 20964 23131 21936 22553 22013 22748 21744 23175 22104 22673 22811 22599 22039 23476 22568 22798 22532 22957 22125 22935 22752 23062 22182 23352 22179 22734 22493 23481 21916 23348 22208 22903 22396 23623 22058 22897 22417 23045 21893 23372 22616 22797 22433 23031 22176 23014 22727 23204 21955 23240 22288 22790 22253 23575 21962 23064 22139 23056 21938 23460 22576 22864 22348 23104 22248 22785 22603 23148 22017 23220 22209 22784 22437 23516 22135 23026 22232 22989 22084 23589 22407 22914 22407 23112 21901 23202 22637 22881 22245 23128 22187 22876 22682 23175 21980 23278 22358 23064 22035 23436 22540 22748 22482 22972 22129 23098 22875 22928 22170 23152 22358 22787 22287 23466 22563 22802 22599 22893 22160 22774 22761 23008 22110 23063 22353 22720 22375 23393 22535 22798 22503 23149 21821 23156 22977 22737 22340 23112 22404 22574 21944 23601 22893 22304 22602 22752 22126 22339 23332 23237 21844 23125 22354 22019 22743 23889 22371 22230 22755 22961 21628 22859 23528 22497 22064 23032 21544 21992 23027 23552 21776 22797 22661 22416 21807 23492 23101 22065 22672 22818 22368 22148 23392 23344 21872 22416 22816 22264 21792 23255 23392 22137 22447 22958 22222 22168 23482 23502 22277 22446 22830 22379 22523 22837 23170 22201 22940 22557 22892 22044 23033 22905 22829 22459 22967 22680 22208 22199 23016 22946 22820 22321 23017 22506 22730 22277 23086 22884 22769 22210 23047 22390 22664 22380 23319 22567 22552 22572 23031 22317 22621 22664 23239 22366 22759 22497 22999 22343 22628 22753 23243 22144 23007 22445 23186 21979 23111 22892 23127 22023 23040 22456 22973 21878 23138 22757 23168 22074 22997 22448 23006 21911 23171 22781 23071 22180 23188 22162 22773 22323 23496 22382 22799 22283 23152 22416 22712 22530 23608 22103 22928 22295 23207 22084 22821 22465 23616 22196 22890 22432 23109 22299 22696 22519 23497 22348 22745 22342 23137 22294 22768 22352 23533 22195 22904 22410 23059 21995 22786 22438 23508 21914 23107 22423 23128 21781 23226 22592 23200 22037 23192 22317 22966 21911 23303 22678 23213 22050 23093 22332 23143 21813 23109 22694 22992 22217 23176 22120 23032 22001 23630 22660 23096 22065 23269 22023 22900 22001 23437 22424 22881 22407 23098 22160 22771 22617 23418 22331 22785 22453 22912 22282 22649 22555 23356 22164 22813 22394 22893 22023 22964 22786 23056 22112 23002 22362 23068 22135 23191 22768 22759 22263 23015 22361 22744 22487 23453 22519 22617 22493 22867 22472 22552 22487 23397 22357 22812 22584 22806 21949 5514 18501 19688 19448 20750 20237 20396 19707 21447 43452 26423 23405 23616 22886 22513 22570 23962 23483 22378 22552 23358 22644 22471 22244 23698 23532 22440 17387 21418 21180 20672 21385 22541 22116 21107 21221 43461 24096 22442 22644 24120 23385 22290 22986 23156 22538 22332 23515 23751 22535 22342 23136 22731 77 20952 22343 21429 21955 21909 22125 21542 22351 22228 28000 22863 23513 22967 23100 22565 22990 23197 23270 22391 23031 22798 22810 22357 23360 23040 22855 15869 22121 21753 22037 21870 22881 22080 22261 22183 22511 23534 23076 23064 23561 22443 23016 22675 22999 22425 22855 22882 23324 22231 23136 22473 22981 22189 22085 22205 22567 22247 22727 22009 22391 22477 23175 21978 23430 22614 22850 22104 23460 22734 22839 22388 23217 22125 22915 22666 23413 22091 23351 22135 22837 22439 23508 22096 22934 22513 23034 21884 23210 22720 22921 22513 23111 22022 23251 22761 23079 22146 23216 22197 22916 22698 23121 22202 23249 22148 22806 22734 23337 22071 23221 22183 22775 22478 23461 21984 23144 22263 22653 22608 23338 22028 23158 22144 22742 22469 23339 21954 23330 21577 22720 22635 23159 22119 23207 22135 22774 22643 23232 22091 23164 22326 22753 22768 22791 22353 23008 22112 23062 22760 22728 22449 22984 22032 23139 22650 22628 22536 22969 22164 23367 22328 22848 22456 22693 22225 23421 22140 23078 22382 22538 23283 22305 22676 22272 21637 23618 22644 22449 22672 22275 22441 23552 21773 23010 22512 22188 23634 22311 22766 22690 21795 23456 22890 22263 22734 22256 22851 23281 22096 22852 21898 23401 22866 22309 22712 22100 23288 23453 21859 22935 22667 22483 23284 22197 23040 22183 23041 22789 22640 22613 22672 22689 23177 22488 22890 22224 23136 22476 22808 22579 22498 22856 22784 22614 22944 22166 23300 22279 23196 22287 22860 22800 22670 22511 22753 22640 23126 22280 23140 21937 23345 22365 23045 22359 22784 22599 23069 22310 23047 21797 23424 22248 23124 22308 22731 22685 22908 22373 23074 22272 23514 21962 23265 22122 22953 22638 22786 22325 22789 22531 23081 22468 22978 22040 23552 22064 23265 22024 23003 22577 22853 22365 22887 22485 23287 22164 23178 21988 23613 22436 22923 22264 22528 22762 22816 22472 22984 22063 23442 21987 23126 21927 23450 22144 23168 22169 22772 22669 22922 22438 22993 22487 23266 22094 23023 21965 23455 22180 23127 22090 23045 22584 22776 22361 22616 22690 22920 22405 22903 22183 23449 22126 23065 22168 22824 22882 22625 22500 22436 22921 22940 22382 22792 21754 23593 22316 22901 22384 22072 23554 22001 22823 22176 23089 22935 22080 23002 21792 23352 22694 22647 22384 22103 23560 22055 22827 22137 23176 22894 22576 22549 22103 23808 21981 22939 22680 22642 23234 22336 22949 22033 23385 22261 23009 22509 22836 22788 22768 22485 22631 22613 23156 22232 22850 22138 23205 22283 23120 21887 22907 22741 22728 22439 22626 22650 23202 22214 22972 21938 23372 22138 23200 22333 23024 22699 22829 22391 22771 22473 23174 22326 23200 21805 23520 21952 23229 22087 23168 22432 22962 22256 22720 22565 23049 22255 23042 21927 23488 22150 23216 22128 61 15771 19456 19805 20566 20472 20992 20381 20904 20386 41396 23967 23748 22669 23776 22798 19272 20881 21704 21471 21824 21210 21769 21564 22103 43458 24903 22343 23927 22554 23406 18019 22183 21364 22321 21584 22030 22242 22128 21961 22344 24008 23940 22693 23326 22368 15726 21376 22580 22007 22634 22658 21908 22264 21972 22599 24613 22848 23081 22248 24086 22077 22681 21963 22426 23205 22108 22578 21901 23171 22255 25297 22856 22992 23394 22727 22727 22167 23869 22103 22991 22263 23111 22929 22752 22677 22580 23225 22528 22976 22252 23461 22299 23077 22663 23052 22764 22769 22448 22670 22988 22810 22567 23063 22698 22921 22510 23056 22197 23618 22017 23223 22425 23224 22383 23131 22280 22833 22784 22912 22446 23130 22084 23552 22018 23232 21948 23452 22150 23191 22148 22752 22728 22842 22369 23133 22201 23535 22038 23324 22601 22999 22643 22875 22435 22873 22538 23208 22016 23149 21978 23417 22253 23194 22132 22592 22656 23118 22354 22990 22033 23408 22042 23136 22371 22884 22806 22706 22523 23168 22384 23223 22256 22990 22006 23394 22229 23031 22348 22471 23350 22267 22784 22381 22809 
20977 21446 21218 21987 21116 21252 20924 21668 21253 21717 20888 21531 20545 21575 21424 22002 21142 21423 20894 21560 21157 21609 21046 21344 20676 21455 21331 22050 21244 21434 20848 21580 21257 21515 21147 21224 20865 22907 21021 22078 20916 22987 21122 21941 21116 22880 21198 21824 21300 22544 21418 21242 21144 21341 21175 20949 21216 21451 21403 21256 21662 21263 21370 21017 21293 21484 21401 21219 21286 21296 21478 21061 21813 20936 21536 20838 21941 20795 21565 20764 21921 20975 21398 21392 21601 21241 21228 21468 21344 21215 21105 21535 21197 21120 21258 21597 21257 20994 21272 21361 21609 21243 21855 20849 21683 20611 22121 20803 21596 20785 21879 21029 21579 21266 21521 21107 21269 21512 21261 21015 21377 21240 21629 21144 21627 21121 21577 20936 22013 20776 21613 20627 21956 21057 21560 21381 21483 21184 21262 21454 21383 21056 21169 21538 21385 21028 21326 21490 21626 21066 21659 21049 21736 20849 22104 20828 21673 20669 21987 20883 21654 20821 22139 20832 21590 20942 21980 20938 21619 21152 21753 21185 21479 21234 21900 21080 21490 21325 21677 21248 21682 21382 21700 21255 0 59 55 4753 18847 18967 18340 17549 17895 17833 39971 29099 24535 23177 22951 22228 22282 22584 22275 21863 21625 22705 21847 22008 21452 22774 21568 21904 21432 22808 21442 21734 21344 22728 21300 21795 21216 22755 21294 21740 21110 22715 20985 21809 21038 22735 21072 21884 21061 22631 21072 21984 21416 22285 21601 22069 21351 22245 21415 22108 21305 22364 21599 22043 21454 21505 22425 21534 21504 21578 22037 21895 21479 21867 21857 21924 21594 21884 21972 21776 21623 21612 22103 21701 21671 21606 21472 21111 21142 21093 21448 21193 21041 21262 21504 21429 20997 21596 21472 21390 20972 21468 21223 21505 21120 21496 21138 21479 20955 21713 21082 21585 20939 21625 21005 21657 20898 21912 20811 21655 20640 21885 20857 21553 20775 21929 20801 21585 20648 21974 20800 21558 20925 21958 20897 21511 20864 21848 21068 20916 21173 21639 21087 21680 20903 21835 21109 21541 21245 21399 21106 21253 21462 21228 21060 21184 21559 21263 21088 21208 21475 21448 20978 21458 21286 21480 20935 21508 21188 21616 20933 21537 21115 21665 21100 21684 20919 21726 21001 21902 20758 21709 20953 21833 20664 21607 20777 21967 20989 21487 20810 57 13696 17104 18232 18987 18702 19179 19306 19285 19157 29529 24660 22656 21760 22010 21863 22055 21049 22129 21399 21992 21353 22078 21293 21797 21128 22097 21123 21701 20910 22074 21030 21601 20906 22042 21049 21683 20913 22048 21073 21599 20903 22039 21079 21475 21079 21897 21235 21405 20845 21911 21014 21477 20951 21770 21191 21706 21120 21639 21254 21289 21514 21248 21399 20957 21472 21360 21383 21020 21702 21097 21536 20792 22051 20859 21569 20512 22153 20807 21568 20534 22290 20736 21558 20662 22352 20582 21561 20576 22296 20645 21478 20628 22233 20677 21520 20631 22339 20758 21629 21001 21948 21085 21504 21082 21702 21281 21462 21207 21522 21570 20825 21132 20880 22228 20851 21163 20903 22002 20977 21283 20870 22056 20758 21337 20679 22323 20717 21353 20389 22329 20927 21264 21015 21657 21270 21090 21134 21568 21244 21269 21504 21262 21496 21312 21289 21525 21500 21376 21336 21220 21639 21283 21372 21127 21737 21046 21456 20897 21824 20938 21560 20850 21913 21070 21623 21049 21627 21211 21443 21434 21570 21433 21138 21201 21275 21512 21573 21221 21421 20929 21977 20824 21563 20987 21885 21188 21601 21076 21494 21562 21203 15857 19260 20010 20219 20031 20294 20157 20699 19875 20458 23239 23014 21533 22170 21508 21545 21821 21449 21457 21604 21512 21696 21207 21651 20928 22171 20846 21836 21229 21777 21278 21579 20989 21319 21494 21345 21209 21415 21465 21427 21159 21536 21318 21703 20963 21547 20647 21959 20732 21728 20992 21656 21319 21463 21012 21181 21511 21431 21136 21384 21102 21939 21051 21540 20620 22089 20827 21742 21112 21289 21466 21374 21090 21373 21319 21617 21060 21403 20795 22039 20800 21463 20737 21888 20916 21422 20988 21188 21560 21344 21121 21347 21114 21824 20972 21632 20705 22097 20968 21691 20955 21437 21454 21312 21071 21315 21242 21810 20946 21467 20703 22016 20821 21581 20837 21334 21511 21267 21313 21181 21488 21389 21303 20971 21050 21843 20967 21592 21037 21813 21097 21555 20827 21425 21600 21209 21290 21491 21123 21788 20949 21396 20836 21924 21070 21603 21009 21312 21667 21148 21376 21197 20993 21898 20925 21493 20427 22288 20900 21590 21102 21486 21678 21196 21404 20680 22241 20705 21559 21034 21027 22303 20592 21563 20459 22187 21128 21223 21191 20672 22306 21099 21483 21241 20746 22459 20569 21707 20995 21348 21956 17210 19890 19639 21081 20573 20543 20572 19900 21890 20156 22996 21648 21463 22532 20718 21732 21127 21655 21797 20835 21501 21297 21415 21874 20907 21593 20920 21649 21459 21344 21312 21376 21012 21906 20992 21561 20759 21269 21690 21160 21369 21650 20935 21954 21010 21517 21082 21193 21560 21464 21024 21386 20826 21877 21268 21457 21044 21238 21490 21616 21101 21553 20912 21697 21508 21249 21165 21580 20989 22050 20888 21561 20992 21079 21400 21631 21044 21666 21529 21389 21536 21408 21057 21477 20619 21817 21228 21361 21191 21500 20624 21941 21017 21404 21047 21400 21040 22037 20821 21665 20900 21220 21063 22070 20708 21629 20973 21216 21495 21517 21050 21528 20806 21702 21385 21328 21186 21493 20755 21793 21460 21319 21127 21536 20792 22051 20829 21580 21016 21336 21226 21936 20738 21648 21017 21193 21192 21936 20781 21655 20968 21133 21341 21719 20857 21550 20997 21164 21510 21588 20886 21574 20828 21428 21422 21457 20953 21597 20939 21655 21597 21283 21072 21408 20791 21518 21570 21356 21164 21389 20727 21719 21513 21257 21130 21398 20807 21623 21552 21139 21261 21604 20923 21228 21633 21567 20827 21614 21102 21075 21393 21860 20066 20931 20768 21126 20647 21572 20787 21065 20789 23031 21097 22139 21447 21291 21299 21546 20645 22055 22059 21065 21092 21467 20890 20930 22146 21552 20625 21763 20996 20549 21973 22116 20438 21691 21295 21058 20492 22366 21514 20673 21591 21176 20303 21687 22315 20960 20898 21621 21067 20470 21578 22164 20665 21424 21229 20944 21120 22403 21111 20711 21578 21201 20444 21351 22369 21083 20847 21607 21645 20721 21745 21493 21179 21248 21520 20817 21625 21563 21312 21206 21568 21142 21141 21465 21704 20852 21528 21178 21097 21253 21847 21059 21398 21264 21700 20792 21641 21619 21467 21015 21564 21047 21085 21422 21856 20852 21591 21074 21259 20778 21727 21505 21243 21157 21623 21135 21066 21422 21955 20808 21464 21197 21139 20773 21977 21395 21296 21041 21543 20931 21383 21476 21520 20800 21626 20968 21403 20930 22024 21466 21439 20998 21575 20928 21238 21297 21964 20947 21486 21034 21341 20611 21894 21186 21381 21065 21647 20963 21464 21451 21719 20750 21671 21065 21461 20972 22049 21144 21312 21186 21461 20589 21715 21517 21527 20822 21660 20899 21140 21206 22024 20888 21427 21169 21479 20704 21507 21521 21516 20768 21708 20996 21126 21020 22072 20875 21361 21255 21496 20553 21612 21578 21356 20981 21652 21041 21319 21231 22081 21068 21381 21061 21532 20539 21267 20849 22088 21269 21249 21153 21648 21103 21166 21248 22065 21007 21255 21128 21490 20896 21113 21421 21832 20805 21429 21275 21410 20662 21618 21650 21455 20899 21574 21201 21386 20790 21704 21562 21445 21002 21599 21045 21175 21083 21879 21297 21115 21095 21508 21120 21268 20969 21911 21349 21218 21195 21485 21031 21236 20889 21938 21420 21095 21138 21415 20896 21020 21640 21948 20857 21304 21475 21313 20331 21172 22188 21478 20552 21627 21340 21306 20531 21639 22301 21504 20440 21488 21353 20725 20322 21441 22370 21504 20440 21589 21548 21163 20526 21243 22186 22113 20533 21464 21451 21123 20385 21909 22268 21407 20618 21650 21145 20855 20867 22305 21610 20721 21189 21645 21438 20539 21232 22413 21381 20700 21016 21512 21228 20722 21234 21578 21624 20827 21618 21029 21353 20748 21769 21534 21226 21113 21639 21228 21467 20930 21704 21600 21228 21181 21495 21130 21063 21360 21863 21152 21152 21391 21456 20798 21073 21440 21929 21179 21287 21138 21424 21036 21189 21535 21760 20806 21588 21105 21629 20650 21575 21638 21451 20823 21669 21124 21161 20936 21889 21484 21225 21073 21623 20941 21264 21315 21977 21089 21285 21196 21426 21077 21272 21435 21854 52 4423 8763 12372 11624 13476 13482 13886 13433 43347 39616 28025 23168 23752 22624 22664 21827 22765 21698 22169 21404 22617 22045 22080 21581 22391 59 228 11823 15757 15777 16498 16392 17505 16778 17477 43361 30701 24234 23383 22312 22885 21834 22192 21940 22758 21640 22148 21751 22363 21400 21921 21963 55 12645 17162 17587 18343 18199 19429 19002 19156 18748 34851 24812 23474 22108 23122 22308 22291 21701 22408 21571 22040 21645 22720 21514 21965 21723 22121 9710 17781 19130 20250 19421 20264 20007 19761 19644 20848 26946 23673 22263 22701 21956 22336 21410 22444 22040 21941 21449 22165 21559 21668 21767 22533 21456 17847 20000 20923 20231 21275 21159 21182 20600 21450 29268 23513 21982 23196 22084 21681 21944 21999 21227 21828 22648 21929 21280 22222 21460 21210 22411 22683 20860 22076 21788 21635 20992 22680 22199 21194 21871 21787 20805 22034 22365 21077 21899 21963 21161 21648 22666 21543 21407 21925 21163 21566 22696 21911 21176 22160 21589 20987 22305 22301 21424 21803 21821 21355 22385 21648 21648 21656 21804 21325 22240 21653 21609 21745 21811 21435 22338 21636 21652 21571 21776 21609 22322 21389 21767 21737 21792 21437 22347 21384 21945 21425 21571 21728 22226 21355 21885 21541 21497 21840 22197 21272 22037 21821 21769 21799 21860 21344 21375 20843 21436 21495 21191 21141 21796 20868 22048 20764 21649 21012 21322 21504 21698 20953 21620 20789 21731 21354 21290 21131 20823 20781 21935 20873 21643 20890 21121 21456 21449 20890 21605 20829 21807 21351 21229 21165 21337 21157 21858 20762 21634 20806 21556 21302 21383 21143 21479 20978 21925 20855 21687 21223 21609 21415 21409 21075 21515 21069 21884 20731 21719 20804 21721 21248 21393 21033 21247 21458 21591 21031 21477 20737 21801 20849 21509 21149 21133 21583 21268 21283 21250 21158 21973 20845 21505 20972 21741 21393 21233 21060 21113 21248 21757 20891 21384 20641 21668 21476 21155 21316 20684 21856 21351 21288 21226 20556 22549 20749 21522 21163 20651 22409 20797 21675 21053 21050 22193 20600 21376 20455 22153 20985 21533 21120 20682 22297 20830 21572 20995 20988 22210 20576 21684 20935 21380 21988 20679 21607 20819 21644 21257 21504 21035 21159 21546 21253 21221 21335 21344 21560 21143 21338 20828 21751 21121 21527 21069 21202 21579 21121 21233 21294 21320 21649 21102 21408 20810 21878 20859 21473 21035 21543 21399 21312 20997 21117 21417 21335 21141 21456 20785 21973 20822 21737 21117 21632 21336 21461 21062 21224 21483 21794 20923 21571 20581 21987 20779 21814 21040 21570 21392 21463 21020 21441 21175 21785 20840 21560 20647 22016 20870 21744 21302 21533 21303 21381 20995 21099 21396 21431 21105 21536 20821 22091 20846 21671 20972 21879 21156 21546 20921 21260 21469 21283 21213 21381 21025 21925 20775 21735 20932 21628 21245 21446 21062 21085 21568 21301 21310 21488 21198 21742 21069 21507 21030 21712 21193 21428 21079 21170 21623 21168 21322 21589 21033 21863 20864 21524 20468 22148 21132 21394 21033 20571 22294 20591 21530 20856 21520 21890 20800 21444 20669 21621 21814 20999 21271 20515 22209 54 449 8571 11612 13697 13262 13983 13440 15637 14039 43365 31634 24494 23720 22334 22613 1466 14411 15507 16769 16968 17691 17650 17657 17683 43368 30400 24080 23254 22886 22244 6768 15837 17962 18071 19363 18913 19511 18872 19416 43344 28262 23928 23196 22529 22920 8615 18013 18763 20557 19603 20681 20584 21077 20869 20893 22156 21760 21713 21747 21236 19790 20271 21623 20440 21350 20619 21431 21092 21149 20768 21968 21832 21498 21095 21287 21598 21461 21192 21475 21330 21877 20999 21504 20697 22061 20736 21584 20714 21909 21101 21648 21374 21265 21538 21271 21222 21275 21379 21462 21111 21328 20837 21907 20813 21421 20706 21793 20921 21621 21095 21422 21634 21297 21265 21109 21568 21371 21159 21287 20319 22464 20768 21445 21160 21261 22042 20693 21235 20488 22113 21464 21013 21290 20502 22385 20652 21656 21526 20521 22275 20798 21470 20997 21009 21973 21100 21171 21387 21233 21728 20925 21353 20950 21725 21280 21328 21176 21149 21559 21452 21156 21430 20824 22007 20804 21555 20886 21221 21608 21272 21111 21372 21135 21774 21072 21479 20672 21916 20823 21707 21147 21449 21512 21376 
21751 22696 20961 22345 21845 21717 21479 21172 20898 21733 22595 22903 22160 21302 21095 22073 21988 21857 21433 21287 21165 21836 22287 22116 22155 21545 21561 21826 22122 21799 22127 21321 21600 21903 22267 21961 22020 21344 21771 21736 21991 21576 21896 21591 21648 21512 22358 22071 22202 21433 21804 21590 22039 21481 21945 21522 21664 21312 22312 21967 22284 21385 21913 21479 22304 21809 21904 21397 21692 21455 22495 22044 22295 21354 22104 21660 22048 21409 22230 21517 22145 21218 22289 21281 21879 21448 22268 21662 22153 21643 21932 21744 21798 21895 21904 21802 21847 21881 21681 21713 21364 22343 21602 21520 21643 21947 21948 21366 22367 21029 22209 20800 22908 21017 21696 21509 22231 21842 21361 22536 21137 21690 20957 22665 21128 21779 21181 22403 21756 21152 22317 21248 22236 20873 22816 21072 21664 21351 22081 21844 21689 22005 21728 22029 21314 22491 21026 22075 21223 22307 21419 21837 21441 22240 21732 21728 21929 21891 21811 21569 22056 21848 21829 21846 22090 21655 21946 21548 22124 21704 21680 21520 22240 21613 21706 21607 22085 21673 21660 21652 22165 21739 21623 21522 6391 16257 18194 19507 18062 19571 18788 20041 19105 43311 24874 23066 20983 21980 21224 22380 21381 22144 21263 22344 21327 22102 21422 22195 21608 22135 21435 22236 21367 22153 21280 22328 21424 22171 21428 22315 21271 22184 21363 22372 21519 22060 21648 22440 21494 22076 21512 22214 21569 22160 21527 22126 21815 21889 21435 21992 21888 22007 21474 21883 21812 22041 21445 21852 21856 21665 21547 21544 21966 21655 21656 21526 21966 21728 21561 21719 21884 21771 21548 21677 21841 21863 21673 21868 21858 21931 21736 22007 21906 21835 21591 21698 22070 21645 21590 21635 22054 21770 21671 21591 22057 21682 21669 21608 22017 21628 21617 21680 22048 21790 21523 21569 21957 21761 21546 21687 21987 21889 20916 22119 21525 22161 21583 22343 21453 22159 21254 22242 21508 22225 21249 22475 21237 22148 20972 22752 21083 22131 20877 22864 20847 21938 20928 22966 20931 22034 20809 22893 21127 21724 21248 22153 21575 21752 22112 21504 21851 21600 22105 21578 21980 21319 22635 21106 21953 21149 22634 21207 21913 21190 22739 21115 21803 21001 22691 21164 21632 21122 22632 21493 21523 21290 22479 21536 21965 21854 22091 21771 21895 22025 21689 29 17735 20407 20653 20480 20851 20815 20912 21036 21204 28845 22657 21227 22152 21399 22005 21305 22327 21425 21816 21474 22224 21593 21905 21623 22102 21833 21952 21871 21817 21724 21744 22050 21761 21815 21692 21801 21850 21905 21736 21897 21712 21806 21774 21931 21689 21788 21618 21893 21673 21728 21879 21942 21717 21735 21621 21959 21692 21584 21724 21882 21915 21568 21925 21760 21843 21469 21899 21925 21905 21509 22008 21719 22101 21598 22206 21632 22080 21448 22152 21517 22164 21594 22215 21576 22157 21377 22352 21531 22231 21386 22208 21513 22129 21432 22287 21473 22138 21537 21873 21825 21973 21447 21827 21969 21857 21494 21810 21968 21825 21618 21792 21872 21782 21659 21779 22037 21784 21568 21752 22016 21693 21584 21753 21910 21873 21733 21840 21947 21935 21600 21815 21900 21998 21735 21912 21800 21909 21625 22435 21265 22493 21390 21984 21169 22436 21403 22037 21175 22507 21236 22049 21166 22489 21225 22137 21326 22385 21334 22182 21399 22109 21635 22168 21507 21777 22005 21811 21558 21562 22050 21715 21700 22099 21684 22246 21489 21988 21135 22382 21328 22145 21703 22086 21825 21875 21556 21533 22009 21824 21720 21909 17960 22076 20771 21359 20784 21923 20872 21645 20858 43336 22229 22154 21672 21805 22109 21902 21717 22176 21454 22444 21321 21965 21043 22674 21364 22087 21637 21189 22528 21336 21799 21165 22394 21420 21858 21646 21651 22280 21525 21668 21069 22841 20956 22016 20849 22625 21401 22076 21468 21400 22656 21088 21959 21152 22493 21450 21489 21689 20886 22859 20918 22124 21067 22677 21583 21881 21517 21099 22650 21408 22030 21467 21687 22581 21150 21921 20901 22746 21227 22149 21339 22127 22403 21528 21854 21400 22365 21632 22013 21632 21815 22091 21722 21659 21607 22060 21743 21831 21863 21368 22369 21546 21924 21552 21958 22008 21640 21769 21648 22025 21731 21880 21829 21498 22346 21521 22096 21551 22000 21813 21973 21618 21619 22039 21703 21745 21715 21635 22103 21593 21807 21385 22468 21440 22109 21638 21976 21954 21706 21776 21863 21909 21990 21573 21897 21129 22328 21431 22103 21507 22037 21841 21703 21677 21888 21850 22072 21632 21963 21431 22423 21276 22051 21121 22394 21585 22151 21399 21800 21962 21796 21718 21991 21787 22158 21503 21896 21169 22413 21364 22191 21591 21664 22059 21914 21642 21612 21428 22446 21225 22119 13897 21740 21241 21653 21280 21422 21714 21783 21484 21813 22598 22759 21353 22181 21498 21968 21848 21938 21773 22091 21620 22368 21336 22067 21465 22032 21949 21762 21717 21961 21583 22471 21256 22242 21453 21811 21992 21841 21756 22027 21240 22578 21328 22256 21560 21739 22048 21913 21672 21975 21161 22311 21801 21920 21600 21673 21806 22064 21516 22065 21392 22188 21921 21760 21632 21910 21368 22415 21328 22145 21494 21661 21993 21997 21616 21883 21409 21849 22086 21792 21689 21895 21085 22243 21739 21756 21717 21509 21497 22839 21667 21632 21844 21450 21683 22720 20999 22121 21578 21006 22400 22023 20808 22230 21576 21119 22762 21625 21402 21808 20978 22156 22408 21040 22109 21731 20781 22797 21876 21079 22037 21632 21249 22884 21218 22104 21562 21212 22145 22541 20893 22245 21512 21134 22663 22543 20928 22173 21521 21101 22516 21926 21527 21882 22028 21357 22359 21601 21892 21637 21740 22053 22261 21468 22040 21743 21469 21913 22264 21494 21989 21632 21427 22080 22273 21430 21991 21627 21489 22073 22137 21445 21992 21606 21608 22036 22178 21390 22048 21530 21517 21764 22473 21544 22066 21737 22020 21517 22489 21719 21796 21783 21240 20988 21979 21808 21614 21577 21911 21229 22037 25837 21943 21738 21997 21386 21925 21972 21895 21448 22133 21497 21659 21852 22470 21435 22071 21577 21959 21402 22528 21531 21942 21661 21580 21125 22540 22023 21912 21541 22029 21488 21792 21945 21992 21312 22123 21433 21725 21365 22528 21639 21895 21702 22044 21223 22375 21792 21876 21642 22112 21408 21938 21975 22229 21307 22168 21500 21795 21623 22497 21491 21985 21780 22008 21218 22313 21736 21789 21660 22120 21219 22176 21984 22109 21344 22055 21939 21601 21779 22198 21272 22248 21474 21755 21664 22560 21637 21832 21696 21985 21383 22035 22080 22065 21514 22112 21584 21624 21848 22355 21318 21692 21729 21888 21212 22037 22101 21878 21443 22056 21481 21636 21672 22446 21572 21821 21747 21960 21303 22153 21959 21723 21632 22017 21617 21658 21907 22465 21449 21769 21806 21963 21189 21594 22400 21976 21040 22163 21597 21323 21555 22935 21455 21411 21936 22160 20745 22110 22553 21199 21416 22117 20805 21085 22203 22731 21065 21928 21768 21400 20998 22792 22074 21117 21896 21811 21249 21401 22594 22104 20868 22082 21668 21328 21258 22539 22430 21063 21687 21934 21280 21191 22536 22400 20872 21994 21638 21257 21106 22489 22186 21499 21965 21670 21762 21493 22231 21953 21633 21833 22008 21841 21512 21831 22228 21984 21660 21776 21863 21265 21452 21901 22364 21851 21648 21792 21914 21994 21492 21959 22429 21760 21639 21864 21841 21475 21836 22149 22112 21429 22016 21703 21895 21293 22091 22119 21866 21355 22064 21625 21914 21502 22379 21897 21606 21712 22033 21837 21725 21659 22311 22009 21718 21637 22080 21460 21542 21639 22351 21881 21738 21611 22149 21980 21597 21831 22448 21440 21860 21655 21850 21274 22048 22012 22149 21274 22151 21532 21970 21223 22180 22042 22087 21265 22166 21511 21651 21213 22173 21911 22144 21413 22163 21511 21814 21217 22009 22007 22259 21312 21920 21705 22056 21152 22190 22005 21968 21383 22243 21513 22133 21227 22352 21825 21868 21577 22199 21479 21744 21589 22422 21657 21729 21671 22008 21545 21696 21547 22464 21748 21856 21635 22103 21893 21560 21666 22486 21390 21903 21632 21925 21307 21596 21657 22562 21463 21977 21715 22059 21145 21905 21974 22087 21240 22139 21522 21952 21300 22272 22039 22041 21411 22253 21575 21870 21384 22309 21929 21723 21601 22080 21472 21700 21707 22337 21636 21681 21800 21854 21589 21700 22092 22252 21327 21936 21733 21880 21248 21930 22028 22093 21331 22048 21616 21783 21079 22146 22192 21816 21532 22092 15353 18514 20054 21440 20407 19917 20558 20641 19991 43245 24125 23047 21160 21492 22051 21673 21303 21349 22494 22665 21406 21262 22106 21818 21292 21315 36 20728 20411 20903 21258 21096 20502 20807 21918 21947 26958 21923 22067 21795 21106 21723 22785 22235 21016 22032 21733 21674 21194 22200 22880 21492 21302 14866 21105 20747 21768 21771 21436 21249 21813 21250 21248 23647 22628 22093 21719 21605 22063 21696 21643 21652 22324 21985 21593 21827 21803 21612 21482 21991 20520 20979 21557 21648 21603 21227 21687 21959 21828 43232 22904 21773 22008 21408 22279 22099 21937 21505 22092 21597 21626 21561 22351 21782 21728 21777 21912 20857 21664 21914 21881 21241 22010 21521 21616 21249 25920 22221 21775 21713 22075 21563 21796 22135 22305 21258 22209 21505 21837 21605 22539 21392 21961 21642 21959 21186 22165 22019 21835 21528 22039 21671 21731 21949 22071 21356 22187 21943 21715 21750 22486 21232 22208 21555 21680 21762 22476 21217 22065 21507 21773 21319 22488 21466 21930 21587 21941 21476 22411 21505 21940 21593 21774 21530 22547 21474 22141 21505 21969 21411 22480 21363 22072 21499 21715 21691 22304 21305 22198 21586 21773 21541 22436 21364 22037 21523 21600 21920 22272 21414 22093 21579 21740 22026 22182 21541 22088 21383 21782 22060 21817 21674 21927 21275 22326 21961 21618 21783 21870 21138 22681 21271 22096 21572 21191 22561 21594 21657 22074 21184 22082 22599 21084 22007 22173 21034 22941 21181 21893 21547 21014 22545 21760 21440 22023 21303 22057 22365 21044 21977 21532 21649 22529 21013 22169 21199 22033 22592 21248 22001 21394 21332 22854 21486 21968 21901 21542 22391 21313 22057 21525 21771 22185 21576 21858 21854 21781 22235 21532 21981 21442 22032 21969 21719 21766 21600 22001 22021 21705 21836 21270 22391 21568 21943 21649 21532 22093 21648 21703 21889 21636 22298 21395 22016 21397 22153 21885 21717 21699 21871 21981 22229 21493 22024 21229 22323 21603 21880 21478 21633 21942 21874 21580 22000 21136 22461 21303 22123 21480 21755 21972 21713 21701 21808 21816 22103 21532 21954 21241 22464 21349 22199 21456 21902 21883 21763 21657 22157 21597 22429 21235 22197 21312 22245 21865 21920 21569 21751 21888 21980 21587 21955 21285 22426 21226 22056 21205 22400 21476 22018 21417 21624 22024 21664 21768 22119 21569 22362 21489 21932 21231 22379 21416 22096 21904 21912 22016 21752 21738 21824 21888 21978 21696 21943 21120 22440 21421 22091 21948 21711 22240 21508 21834 21524 22077 22119 21201 22051 20903 22563 21415 21681 21436 21160 22743 20959 22048 21328 22016 22690 20917 22241 21283 22292 21907 21935 21549 21207 22727 21098 21981 21473 22097 21793 21713 21664 20893 22980 21388 21960 21479 21690 22305 21512 22008 21403 22288 21560 21980 21799 21796 22064 21496 21860 22017 21684 22117 21529 21944 21287 22367 21562 22027 21569 21708 22081 21573 21784 21826 21794 22236 21479 21987 21356 22354 21495 22144 21895 21824 21973 21779 21702 21889 21781 22090 21536 21897 21162 22425 21336 22115 20908 21975 21912 21760 21580 21753 21845 22364 21280 22071 21268 22308 21462 22138 25 18843 20167 20693 20347 20539 20743 20856 20538 20508 25380 23207 21018 22144 21328 28 20000 21239 20826 21272 21349 21486 21063 21287 21507 28066 22001 21922 21533 22464 21509 20348 20610 21806 21207 21504 21288 21344 21847 21472 32070 22837 21768 22385 21463 22043 18794 21815 21118 21824 21495 21199 22376 20999 21740 21326 22648 22304 21475 21847 20954 18856 20517 22064 21363 21449 22337 21174 21875 21226 22471 22156 22103 21852 22045 22008 21711 21751 21111 22791 21044 21929 21713 22124 21831 21806 21655 21729 22201 21608 21952 21326 22430 21534 21996 21624 21873 21959 21792 21679 21558 22016 21699 21789 21740 21900 22071 21579 21931 21285 22436 21397 22119 21504 22174 21780 21977 21440 21596 22005 21760 21717 21879 21197 22512 21243 22131 21434 22290 21634 21985 21494 21629 21993 21976 21655 21908 21315 22528 21313 22141 21408 21798 22011 21767 21563 21951 21607 22381 21429 21975 21249 22382 21802 21929 21451 21740 21863 22172 21485 21985 21200 22368 21506 22064 21511 21731 22048 21801 21744 21295 21542 22380 21356 22028 21242 22368 21835 22009 21677 21201 22579 21180 21987 21794 
35892 35348 37218 42092 37043 35448 42828 39824 36631 35584 34218 37824 40019 41056 39098 39329 38455 36941 42293 41088 39831 36800 41567 39858 40326 33536 33414 36263 39787 36457 40016 41248 34065 37428 41537 38297 38552 41272 36151 35520 38482 33724 37058 34032 34230 32616 41998 39544 40795 42515 36560 33878 38729 42915 38208 33001 34369 40644 41778 38577 41446 41938 37751 42883 41697 36528 37202 41882 35359 42592 44176 39232 41721 41733 39715 34546 40032 32913 36303 39729 38107 37715 35748 32859 37440 41799 40486 43177 40628 41007 35216 34156 43355 37385 38149 42328 38355 35135 39825 33911 34165 40457 42035 39139 41920 34226 34581 42572 39035 35432 35411 39509 37858 37907 35005 32724 40899 36788 41515 33663 38983 35184 37356 35092 38888 36065 39789 42747 36173 39218 41953 40293 41217 36507 36558 38307 34626 41415 39440 36780 35072 38529 35456 38709 40993 43925 38185 39437 40436 41807 42454 37051 42230 41167 35687 35335 37619 37257 36381 33549 38755 36828 36572 36778 39392 34842 37815 33442 39683 35266 34707 32688 40696 34516 35149 34149 39228 34972 34616 34368 40093 35928 34423 32771 25633 38481 38452 32231 37080 33007 34432 37979 38040 41657 38115 39533 37876 38368 40213 42664 41952 39979 40784 42147 41648 39768 42418 40813 34289 39938 42583 41314 41997 40296 40624 41976 42256 40616 42337 42090 40823 40522 41818 42550 33488 38912 34425 42816 43296 39563 32953 40522 33738 39790 33359 39769 36672 37072 42428 38592 37088 38736 42731 37602 36367 38797 42504 37113 36784 34651 33354 33070 38054 34757 34454 32962 38035 35404 33506 35361 37226 35968 33351 34861 36536 37088 34868 37004 36837 37812 35604 38689 37380 36776 34027 34921 39085 34698 33811 34184 38861 35905 34887 33937 38912 34960 34720 33966 38298 34513 34087 34610 38619 36274 33015 33337 37875 35670 33299 34947 38312 37152 36907 39848 33237 39882 34176 41986 42866 40599 40501 41165 32972 40626 40342 43688 40728 40075 37696 36025 38720 40012 36600 37142 36340 37698 36800 38488 37078 38648 35734 37788 39172 35635 39955 40224 33943 35664 39412 32730 36752 33849 39450 33892 38185 41234 35143 38773 37979 39512 34934 40008 37668 39829 36137 39113 36486 37639 35440 39449 34261 38747 34808 42818 33348 40552 43888 33348 38071 37032 39543 36068 37328 38640 35170 18150 32976 41794 34259 31452 35913 35893 36547 38025 39926 39752 34993 40274 40105 42121 38872 41056 42192 42352 36621 42583 40980 34167 37200 34457 39465 36741 37763 37333 36501 35489 35521 38759 35737 36480 35106 36171 36817 37303 35605 37239 35180 36324 35985 37767 35131 36022 34160 37120 34887 35264 37248 37863 35473 35670 34304 38017 35172 33569 35344 37200 37622 33479 37484 35559 36678 42784 37653 37712 37325 32888 38370 35612 39488 34243 40664 34320 38960 42448 40176 33254 39913 34137 40727 33846 40057 41687 42176 33544 40904 41943 40716 33128 39624 42336 41824 42903 40278 33331 36870 36452 38176 42576 36786 38090 36891 42968 36512 37973 36467 34200 35831 36903 36000 34740 35876 38732 35989 33403 35616 38248 35300 33581 35748 37388 37083 35633 36488 37989 38030 33906 36420 37304 38657 35808 37344 36157 37432 34428 42732 40616 43973 42208 38413 39559 43055 42320 39041 39848 44066 40614 39012 39746 43757 40538 40206 41428 42688 41550 40613 42184 39997 34520 40029 32977 35660 38583 36442 33511 33399 38669 35435 35027 39424 35016 41073 43028 38594 39441 42742 41282 40061 35456 39268 36552 37143 33429 33109 38517 36412 35329 37394 36007 39272 35272 41686 35375 37544 36226 34560 36173 41539 41178 40244 34931 36301 39753 37581 35447 40016 42731 43424 41443 38440 38252 35137 41458 39657 34516 39667 33362 41006 36508 39644 42786 42456 37086 34599 34424 41109 33270 34537 38469 37176 37337 38347 36152 34546 41801 39488 42823 42059 35012 38448 38216 39259 43839 42809 43112 35398 36385 37351 36874 39850 38699 35311 33965 37101 33088 38750 35123 41696 38990 42921 35398 34096 39296 37624 36700 36068 40324 40157 41608 40260 42776 33303 36836 41771 42668 34416 38713 34212 36398 39505 35597 34717 34155 38941 36049 36645 37106 41584 42507 33632 37401 33296 37856 38635 34402 35737 34289 38507 35672 37082 36608 42969 42375 33216 39130 33752 38216 36486 38198 34272 34168 38774 35400 35620 35340 34250 39561 34091 36413 41657 43497 42457 40018 34532 38053 37932 35277 35666 37054 37449 38464 33754 37172 39104 41920 42624 39936 32997 38594 36728 35289 34951 36912 36821 39145 34211 38081 42387 43233 40888 39144 38986 42759 34071 39968 42136 36366 38064 36139 35377 38480 36214 40200 43435 37491 39520 42972 41845 40960 34250 34407 39040 37622 34469 34191 41946 43488 40554 40041 34530 35598 40400 34750 40349 42417 35511 36068 42792 36704 34304 36246 41472 40616 43232 38231 36823 37691 36052 39495 34337 42032 41434 39365 42785 38775 38178 35699 35360 38024 34056 43310 40545 41176 42829 36633 38369 36712 35921 38711 40407 34167 40864 41271 33696 35626 38667 37601 34780 38251 39570 41900 36502 37376 33896 34720 36300 38913 33046 38874 41698 40704 37699 35561 34056 37325 41591 43184 41310 40058 43150 35096 38410 38713 34164 37250 41911 37058 39370 36065 35042 37287 38813 41197 36008 35875 35381 32792 42753 37409 34824 33999 36560 42423 35220 35499 37672 39828 33850 37684 42368 38959 35653 40890 33824 39148 36402 34406 41742 36387 37479 40104 42744 38225 39824 35729 35373 36533 37104 38696 38874 34252 40004 37632 40092 39625 33739 39945 39973 33880 36528 41151 33025 39042 35236 33741 36608 40401 33115 38816 43904 37977 33242 37089 38664 41715 42578 34267 37009 34392 35607 38920 41473 42915 39001 36042 42752 37752 41360 43202 38702 34225 42066 39319 41256 42443 38784 34626 42680 39497 40160 42541 38624 34221 33937 38528 40342 42026 38949 33253 32868 35475 43328 33560 38873 35776 38405 33125 43392 35840 36042 36068 40296 37888 38432 36236 34312 33608 37424 40425 38940 38594 38050 35712 38592 41792 37860 38166 37429 42329 40200 43216 35077 36797 43359 42752 39546 33907 38027 41923 33476 33088 37666 34845 33776 38880 33676 38556 37480 33305 38639 42799 36192 37905 38425 40859 40096 42484 35893 41570 33451 34350 37236 35207 38817 40384 42688 36232 37072 34432 39396 41911 37911 38382 41062 41261 40343 43264 36480 34423 43459 43296 38556 35975 38538 40122 41865 35813 36154 34659 39601 40291 40289 38337 39848 41321 39301 37840 34027 35824 40563 40623 41272 42865 36280 34510 33522 34231 36385 34907 38205 41846 38953 39196 39156 33024 39309 33772 34148 36608 42168 41315 35328 35399 36928 40096 38920 39657 37331 42352 39161 42964 34569 34630 43089 33902 36480 35776 37925 41078 40243 38305 35656 34051 38310 34254 34510 37296 43225 42784 36115 36372 38174 39879 34096 42200 38432 38038 40204 34311 41098 33664 38039 42784 42278 37856 39905 34993 39648 33921 39985 42121 40003 35899 38752 40848 36198 38432 37632 35792 41753 37809 36384 39246 39279 37300 36413 40134 42038 34423 39413 36276 39142 34821 40900 40516 33828 42872 38773 35213 37792 40502 40052 33573 42200 36438 38439 34480 40230 38973 43705 40784 43348 38512 34901 35560 42862 41353 38089 34289 36505 38569 36709 32772 36490 40832 38357 34786 35635 37058 40427 42671 37692 42368 37216 34376 35808 37459 38464 42941 38391 43110 35826 34444 36822 36656 42716 36928 40004 39650 42359 38570 35408 37235 40928 39688 40000 37192 41619 39136 34528 37414 43160 42889 37586 34173 35016 38552 36832 35624 34693 41664 38912 35511 34305 38982 42579 33589 34324 42200 37504 35712 34226 39893 38400 34203 36562 42925 42440 37120 34736 36762 40546 38858 38816 40117 40704 40279 33369 37956 40339 40437 39008 39588 40488 40354 33157 34459 40078 40546 37740 39808 42224 40400 33167 36273 39992 38807 38851 41424 41000 37560 35296 38873 39258 40704 38809 38077 41805 41347 33152 39786 40469 42129 36696 37088 33744 40584 43095 35862 33850 42663 34952 35384 34828 38497 33444 34792 33332 42888 36008 36696 34329 39549 37331 33480 34480 43408 42185 37795 34172 37539 41124 34224 34523 33640 42519 38531 35457 39095 39416 37409 38245 39543 40480 40275 33105 37585 40800 41177 39104 38962 42117 41604 34055 37075 41577 41881 37952 35641 33907 38967 42617 35352 35288 41784 34519 34764 36042 36961 33911 34924 39352 41376 41601 37801 35668 37098 40042 37826 38716 39660 41353 38912 34199 36016 38656 39916 40503 36539 33152 39136 39851 31627 37986 42154 42320 37160 32935 33499 37463 40915 41175 39536 39527 42960 39223 35000 40918 41616 44001 35456 42004 40720 39782 36618 40778 41178 18313 33979 41912 36960 40364 38893 32216 35464 37570 38076 40160 37733 39189 36288 38826 35644 36192 41122 37912 38568 35721 34816 39714 40661 37540 42915 41159 34458 38752 35040 35643 35904 42280 40384 36588 40128 40181 36000 34607 39459 35656 34062 39170 35054 34489 34349 41617 38503 34056 36408 36359 34201 42656 38784 32352 37401 33525 34172 33956 40208 35281 38066 36539 40428 37904 36054 38549 41837 41613 39749 37858 32737 39245 34249 34294 33422 42184 36240 35342 35770 37357 36317 34504 37395 37297 40457 38828 33032 33927 39985 39121 41088 36305 35223 39290 33821 35936 40033 41682 40576 40774 32921 36624 34086 33508 41415 38257 34506 38052 39680 40327 38715 36844 33001 38713 34983 35477 37993 39368 41651 40784 38081 35440 35748 43500 40428 40660 33691 34624 35509 43365 40340 39185 32948 35824 41088 43704 43012 37957 33945 37747 42673 43079 33034 37568 34016 35870 33061 33452 42422 40409 32896 37911 42029 43560 41941 39354 43280 35680 35140 41317 41173 40800 33968 35866 33225 42704 41813 39003 33164 33688 37237 41039 42240 39812 33992 35576 38566 40487 33472 39140 41901 36208 39056 36576 34845 37681 40705 42038 38330 34268 35991 37157 39089 35397 40550 39447 33728 39739 33902 33840 34508 39141 39665 39303 34595 38598 38807 40408 38208 38340 39945 37356 33507 37661 33568 35399 42002 38932 41120 39204 42576 38356 38356 33286 34249 33188 37648 40300 40296 38768 34169 39888 38625 41798 41364 37413 43008 38235 37512 33301 42541 41175 39248 33234 35776 40411 33805 36697 36992 35991 41100 33380 38292 42309 38755 38187 35584 35736 33825 38336 38656 35328 36625 40487 42904 33738 37824 34504 33042 39383 34471 35204 37015 34252 41401 42033 38552 41946 40288 37595 35443 35099 37228 38439 41056 43175 38825 40505 41986 34344 37026 42780 34522 37750 37097 33792 38256 39025 43528 41332 40119 42904 36263 38112 35282 35138 36103 36311 39670 33301 37728 40467 43273 41771 40931 42559 37686 37417 35778 34606 40106 34256 42912 40624 40794 41014 41332 37272 37404 33584 35798 36933 38334 33940 37863 40724 43076 40521 39104 40131 42515 42967 38690 42208 34551 38419 34628 35632 39779 33673 42120 43076 38029 40566 42752 42297 39531 37251 37400 38358 35844 35634 36280 36953 38290 34999 37894 38827 43047 42582 39782 38039 35560 40832 32929 36461 32944 39200 39987 39986 39097 36902 33856 42021 35096 42256 39605 36301 37516 38757 41108 38481 35377 36816 41001 40865 41521 37660 37981 33581 39927 36089 38774 38528 42709 39656 36219 35218 34487 36565 38501 41836 38184 43058 35357 41456 33012 38416 42087 41456 33702 38173 36361 36048 38900 43008 37149 38419 34966 39680 33267 37658 40853 42727 33881 38596 33640 35128 39130 33794 35802 36391 36014 41027 43090 38675 41627 42304 43380 40040 37442 36336 38212 36000 35168 37037 35992 39381 33127 37149 39488 43008 41500 39916 37051 38327 37490 35547 33733 35753 36718 42327 40666 39491 40512 41717 42858 40267 18265 34501 39456 34532 41367 32938 34717 36080 32523 32182 42822 41414 38087 39796 41161 18299 36616 40452 36022 40384 41628 43212 38789 40905 33006 41603 38685 37596 33312 42897 32996 41370 33488 36245 40096 32727 40439 41346 37109 42512 44009 37270 35741 42412 42978 39243 34872 36437 39184 36419 43050 40368 42544 37946 35784 41240 35074 41334 42946 37193 37306 35305 32246 38711 41707 42660 42180 39896 37312 40272 43632 40424 39824 37008 38976 38699 35591 35904 39043 36632 38101 37767 35312 39768 36836 36392 34720 35348 40608 34240 37664 41282 43248 33621 38368 34363 36928 38149 35992 35101 33422 38144 35223 36134 35693 37272 39338 33971 37696 40714 43096 42172 40119 32748 40206 36050 38233 42199 34273 38539 35615 35331 37268 40001 43841 40860 40119 42473 41561 34476 38150 43043 34869 38388 38248 34760 37271 41008 33427 40744 40325 41977 36409 38786 36006 33647 38054 34280 42496 42519 38586 40237 42762 36538 37684 42597 35990 37060 40327 43144 38565 39821 42299 32992 38739 33075 35392 38668 36342 35540 41060 33493 42337 41804 38912 40545 42322 37008 38679 35124 39749 34251 39616 38504 36112 
24312 23364 24983 23840 23291 23188 24092 23983 24235 23685 23835 22992 23567 24269 24793 23961 23395 23142 23754 24398 23642 23781 23485 23523 23444 24369 24169 24162 23578 23782 23840 23968 23645 23806 23328 23625 23660 24355 23952 24099 23655 23582 23501 24072 23602 23808 23356 23683 23400 24215 24027 24282 23575 23672 23393 23995 23593 23882 23321 23734 23318 24264 24025 24297 23497 23837 23492 24081 23605 23901 23311 23655 23480 24360 23783 24030 23238 23790 23651 24013 23360 23740 23061 23982 23740 24563 23413 23911 23403 24212 23614 23972 23387 23597 23750 24246 23872 23831 23270 23808 23548 23833 23460 23773 23073 23938 23854 24256 23713 23369 23269 24137 23688 23687 23173 23337 23929 24629 24354 23765 22827 23232 23671 23963 23501 23354 22679 23256 23904 24592 24135 23575 22848 23456 24016 23495 23861 23538 23424 23232 23801 24000 23932 23527 23535 23409 23773 23585 23586 23168 23995 23316 23556 23447 23605 23611 23414 23668 23476 23482 23431 23744 23355 23559 23307 23744 23395 23388 23181 23826 23344 23393 23288 23697 23359 23310 23228 23590 23479 23217 23474 23686 23472 55 59 6123 9022 9664 9857 9603 10581 9878 11351 43640 33781 28513 27783 26030 26242 25153 26011 24821 25283 24513 25312 24246 25083 24205 25033 24007 24769 23886 24876 23829 24583 23803 24836 23600 24469 23668 24602 23641 24388 23555 24586 23593 24333 23526 24387 23552 24312 23493 24324 23560 24237 23562 24001 23747 24073 23441 24040 23741 24057 23488 23976 23625 23944 23419 23714 23872 23629 23399 23514 23924 23589 23570 23567 23814 23610 23381 23549 23769 23577 23351 23561 23619 23657 23424 23688 23816 23731 23573 23552 23808 23653 23541 23611 23896 23577 23383 23575 23831 23545 23502 23552 23823 23588 23523 23506 23820 23684 23376 23619 23832 23735 23415 23616 23758 23728 23379 23873 23553 23918 23563 24080 23286 23906 23208 24210 23227 23903 23284 24188 23159 24159 22954 24520 23034 23940 22860 24614 22906 23684 22752 24669 23058 23650 22772 24585 22933 23575 23015 24204 23276 24031 23776 23648 23757 23318 24292 23546 23817 23223 24293 23053 23752 22976 24535 22960 23796 22866 24432 22858 23605 22821 24402 23041 23399 23083 24247 23318 23411 23268 23889 23800 23370 23511 23868 23575 23609 23629 23495 23560 23357 23787 45 8467 11497 13132 13535 13491 14168 14169 14605 14249 34735 28352 26976 25656 26081 24951 25145 24605 25153 24412 24545 24322 24676 24232 24759 24313 24307 24144 24240 24320 23944 23976 23975 24218 24017 23936 23859 24101 23877 23881 23813 24091 23861 23832 23776 24092 23831 23645 23799 23998 23742 23730 23697 23978 23724 23612 23680 23891 23877 23521 23945 23656 23980 22822 23929 23752 23926 23442 23962 23590 23980 22823 24196 23386 24084 23253 24083 23445 23990 23232 24282 23393 24060 23363 24208 23228 23993 23296 24152 23247 24032 23189 24143 23100 24005 23329 24097 23409 23923 23283 23883 23509 23831 23339 23713 23650 23836 23340 23669 23659 23565 23363 23552 23739 23623 23354 23517 23761 23593 23373 23477 23625 23504 23373 23463 23763 23569 23463 23608 23626 23534 23443 23584 23712 23539 23554 23609 23501 23636 23400 23705 23083 24124 23233 23697 23039 24152 23236 23808 22900 24118 23054 23876 22888 24131 23006 23919 23095 24084 23124 23925 23285 23865 23384 23751 23241 23591 23673 23505 23291 23380 23625 23507 23479 23020 23323 23988 23243 23655 22912 24077 23217 23788 23424 23719 23607 23521 23296 23237 23701 23642 51 13002 15204 16305 16013 16690 16247 17536 16571 17470 33541 27446 25683 25593 24716 24431 24788 24395 24301 24276 23800 24767 23655 24227 23268 24666 23589 24169 23836 23416 24584 23313 23933 23206 24455 23582 23958 23723 23888 24073 23576 23691 23147 24519 22997 23997 23120 24409 23501 23832 23372 23207 24500 23024 23753 23200 24192 24055 23271 23654 22993 24664 22769 23992 22888 24201 23524 23634 23364 22907 24273 23383 23735 23362 23211 24337 22912 23825 22876 24547 22955 23940 23428 23623 23969 23451 23735 23107 24023 23525 23793 23331 23604 23765 23375 23473 23516 23769 23858 23360 23585 23108 24041 23124 23749 23293 23511 23798 23386 23588 23368 23725 23607 23497 23490 22989 24034 23142 23758 23244 23737 23479 23652 23296 23264 23732 23430 23465 23677 23329 23812 23269 23616 23012 24154 23113 23709 23223 23339 23764 23492 23476 23618 23488 23887 23129 23612 22994 24107 23064 23772 22592 23385 23713 23407 23402 23503 23471 23830 23278 23651 23029 24096 22979 23875 23197 23949 23257 23829 23120 23391 23588 23490 23302 23607 23305 23932 23058 23704 22784 24038 23238 23637 23211 23399 23622 23469 23300 23636 22976 24065 22886 16522 17427 18869 18767 19171 18869 19172 19383 19627 43619 26482 24544 25357 23934 24569 23802 24180 24142 23954 23801 23338 23384 24257 23265 24089 23425 23722 23841 23668 23527 23831 22978 24295 23265 23968 23309 23559 23813 23797 23383 23735 22934 24194 23249 23816 23183 23430 23729 23959 23151 23844 23189 23869 23607 23480 23492 23664 23438 23993 23188 23729 23414 23675 23756 23533 23454 23621 22937 24112 23260 23669 23324 23416 23522 23879 23028 23897 23251 23296 23662 23660 23176 23633 23196 23838 23808 23252 23597 23574 22683 24003 23955 22993 23677 23531 22841 24501 23217 23223 23626 23030 23419 24480 23040 23706 23249 22770 23931 24034 22869 23846 23194 23210 24348 23160 23315 23634 22720 23475 24327 23073 23515 23351 22713 24288 23369 22982 23656 23322 23114 24422 22995 23495 23353 22889 22999 24454 23064 23496 23522 23074 23280 23787 23360 23465 23479 23017 23846 23507 23378 23440 23972 22976 23959 23448 23360 23446 23657 23185 24064 23219 23483 23415 23357 23204 23837 23242 23570 23442 23422 23328 23933 23014 23596 23378 23520 23296 24006 23049 23539 23401 23629 23023 23934 23639 23357 23456 23531 22967 23714 23584 14923 20389 21230 21179 21116 21365 21592 20907 21632 21248 25095 24325 24208 23324 24070 23402 23445 23625 24312 23221 23688 23392 23757 22996 24074 23456 23516 23372 23721 22952 23975 23619 23571 23303 23727 23129 23309 23601 23940 23040 23808 23177 23360 23403 24141 23153 23560 23464 23648 22961 23893 23593 23582 23289 23779 23144 23465 23755 23715 22949 23879 23170 23464 23282 24100 23218 23465 23248 23612 22928 23924 23620 23441 23310 23651 23110 23609 23544 23697 23100 23855 23090 23383 23315 24045 22846 23738 23108 23501 23104 24129 23144 23569 23302 23614 22842 23799 23841 23817 23126 23815 23296 23357 23379 24064 23033 23623 23296 23603 22901 23732 23581 23453 23191 23730 23697 23191 23424 23993 23090 23495 23356 23575 22948 23840 23591 23483 23140 23721 22850 23338 23658 23782 22923 23716 23280 23560 22775 24030 23911 23475 22977 23768 23269 22999 23350 24413 23179 23014 23632 23346 22528 24051 24220 22891 23425 23754 23151 22889 24035 24076 22619 23444 23562 23413 22799 24299 23695 22787 23548 23450 22720 23399 24270 23439 22807 23776 23204 22816 23271 24470 23389 22839 23605 23366 23004 22967 24148 23739 22656 23671 23310 23014 22836 24384 23485 22885 23637 23347 23196 23226 23911 23335 23319 23481 23591 23141 23419 23673 23781 23063 23562 23351 23476 23001 23285 23723 23714 23037 23489 23469 23504 22996 23571 23826 23564 23173 23527 23429 23609 23008 23639 23687 23416 23267 23655 23191 23328 23284 23930 23360 23424 23416 23645 23376 23209 23410 24033 23303 23246 23475 23412 23107 23398 23625 23835 22941 23573 23422 23495 23111 23407 23501 23988 23058 23591 23309 23599 22950 23411 23624 23831 23002 23687 23271 23463 22891 23927 23559 23472 23124 23760 23136 23330 23200 24061 23289 23369 23314 23646 23111 23363 23162 24128 23259 23400 23210 23757 23127 23368 23206 24058 23302 23440 23256 23772 23092 23325 23141 24121 23441 23453 23264 23757 23581 23452 23275 24032 23117 23464 23340 23661 23036 23497 23456 24055 22929 23649 23299 23728 22744 23696 23607 23693 22980 23613 23284 23629 22891 23509 23637 23808 23020 23778 23215 23319 22778 23950 23641 23586 23018 23822 23080 23221 22793 23845 23568 23689 23068 23776 23148 23327 23228 24131 23244 23372 23311 23584 23472 23149 23238 24039 23254 23387 23365 23629 23271 23299 23625 23938 22938 23604 23424 23569 22864 23525 23736 23638 22981 23792 23213 23437 23070 23927 23592 23377 23296 23716 23135 23360 23321 24064 23336 23393 23344 23680 23235 23159 23530 24086 51 839 6194 8354 8597 10071 11031 10609 10066 11423 43155 33198 28512 28394 27904 26296 25565 26432 25521 25303 24573 25711 25917 24927 24314 25288 24807 368 10425 14503 14599 13863 14439 15329 14983 14870 14800 36017 30424 27543 26664 26947 26012 25425 25577 26566 25543 24682 25490 25181 24092 24240 25243 25601 12553 16269 16906 17126 17301 17837 18331 17550 18119 43634 29308 26992 26325 26164 26112 25238 25288 25238 25011 24679 24972 25135 24855 24415 24872 24442 24587 17999 19556 19806 19695 19635 20287 19799 19908 20022 30755 26304 25605 25220 25143 24843 24551 24775 25061 24229 24562 24392 24464 23816 24579 24512 24496 15701 21673 21305 21549 21683 22439 21705 21916 21720 22088 25288 24856 24664 24770 23733 24514 23896 24327 23797 24701 23926 24108 23963 24180 23324 24529 24029 23970 23717 24385 23079 23925 23893 24464 23465 24196 23703 23897 23703 24391 23405 24213 23552 23982 23444 24444 23529 23973 23592 24161 23411 24377 23724 23908 23648 23962 23175 24133 23876 23631 23696 23896 23300 24297 23738 23811 23567 23934 23008 24273 23751 23760 23633 23904 23133 24325 23552 23760 23597 23860 23142 24306 23608 23773 23591 23717 23173 24236 23573 23695 23495 23686 23369 24184 23224 23884 23383 23564 23584 24149 23185 23921 23335 23424 23786 23920 23281 23819 23463 23678 24004 23688 23594 23700 23079 24473 23614 23814 23687 23141 24280 24333 22995 24252 23667 23438 24647 23296 23801 23660 22823 24505 23756 23621 23693 23224 24142 24192 22925 24056 23913 23511 24627 23132 23862 23136 23303 24674 22967 24097 23514 23415 24561 23110 23847 23644 23008 24240 23644 23692 23713 23248 24147 23269 23920 23492 23577 23988 23522 23751 23376 23548 24104 23289 23823 23345 23806 23879 23588 23574 23559 23749 23896 23500 23818 23157 24083 23517 23777 23450 23470 23915 23660 23584 23845 23320 24277 23120 23928 23289 23685 23748 23588 23468 23648 23513 24120 23246 23923 23359 24108 23594 23848 23357 23497 23671 23828 23280 23959 22993 24230 23276 23862 23311 23595 23817 23561 23505 23728 23547 23985 23312 23808 23033 24208 23361 23921 23371 23524 23716 23632 23469 23439 23171 24271 23075 23896 23016 23792 23707 23617 23417 23796 23643 23957 23328 23908 23164 24312 23091 24016 23143 24259 23539 23665 23348 23347 23740 23632 23533 24001 23386 24056 23221 23771 23081 24085 23370 23841 23305 23515 23864 23472 23457 23530 23719 23854 23525 23719 23059 24006 23368 23797 23347 23351 24199 23175 23633 23351 23601 24455 22762 23925 23021 23970 23863 23504 23347 23001 24503 23007 23848 23591 22928 24626 22728 23936 23253 24113 23608 23557 23347 22885 24397 22982 23814 23260 24055 23731 23041 23691 22935 24311 23528 23483 23616 23389 24002 23260 23761 23233 23957 23383 23684 23371 23407 23817 23424 23537 23516 23275 24041 23146 23766 23080 23905 23408 23750 23332 23436 23825 23474 23405 24202 23296 24117 23082 23883 22948 24151 23152 23823 23207 23410 23681 23416 23392 23727 23429 23918 23179 23687 22854 24103 23085 23861 23204 23589 23653 23506 23357 23593 23193 24143 23098 23848 23028 24012 23354 49 3863 7458 9323 9713 9987 10515 10781 11073 43631 37517 30868 29045 27257 27264 1642 12738 13679 14729 14336 15244 15444 15247 15350 15577 36231 30933 28364 27723 26699 2539 16103 17552 17241 18180 18130 18249 18134 18150 18657 33882 28732 27711 26596 27021 25951 19319 19276 20761 19992 20800 20301 19915 21175 19907 34081 27840 26990 26839 25491 26063 20426 23187 21959 22592 22108 22079 23228 21825 22589 21804 26920 25380 25587 24989 25509 25372 24841 24900 24186 25584 24567 24771 24600 24875 24738 24674 24098 24467 25001 24432 24654 24032 24985 24221 24628 24380 24449 24693 24333 24268 24232 24513 24327 24287 24297 24405 24578 24204 24480 23628 24855 23801 24584 23819 24523 24141 24224 24060 24116 24332 24201 23850 24337 23560 24755 23629 24426 23704 24437 24048 24165 23869 24039 24064 24377 23829 24268 23447 24566 23842 24361 23672 23971 24168 24000 23991 24166 23646 24647 23429 24391 23719 24312 24007 23985 23792 24050 23806 24426 23554 24068 23369 24358 23773 24139 23576 23696 24044 23985 23824 23992 23581 24452 23447 24137 23391 24257 23831 23959 23636 23378 24602 23445 23964 
22412 22487 22166 22904 21888 22575 21669 22444 22197 23061 22410 23009 21776 22460 21969 22849 21888 22687 21437 22389 22096 23087 22503 23168 21877 22650 21985 22954 21857 22609 21525 22487 22103 23153 22389 22547 21636 22560 22122 22770 22091 23213 21854 22394 22021 23157 22592 22713 21843 22488 21993 22957 22151 22397 21512 21592 21581 23157 23228 23113 21505 21593 21693 22770 22107 22339 21714 21583 21797 23407 23192 22793 21397 21953 22335 22713 21987 22042 21926 22180 22801 22601 22626 21846 22167 22414 22367 22085 22201 21751 22333 22780 22992 22150 22161 22101 22561 22108 22324 21614 22154 22291 23102 22427 22681 21656 22547 22155 22468 22272 22267 21731 22946 22411 23090 21752 22500 21838 22799 21968 22521 21616 22133 21968 23184 22537 22768 21480 22399 22108 22839 21735 23036 21617 22433 22217 23243 22426 22871 21733 22323 21659 22908 21836 22585 21479 22476 21805 23004 22387 22952 21921 22279 21686 22643 22161 22668 22352 22323 21526 22700 22350 23167 22017 22235 21741 22649 22179 22402 21798 21750 21234 22774 22999 23435 21960 21785 21447 22784 22298 22364 21720 21472 21625 23219 23168 87 88 93 466 4485 5771 8096 43594 43664 43673 40557 33506 31253 28516 27783 26521 26121 25488 25175 24712 24339 24748 23776 23456 23709 23846 23368 22944 23491 23593 23335 22589 23064 23597 22928 22528 23014 23587 22677 22496 22621 23344 22517 22452 22336 23363 22277 22470 22096 23631 21994 22678 21911 23630 21941 22660 21801 23523 21815 22670 21858 23466 22109 22568 22304 22561 22297 22628 22420 22701 22236 22700 22214 22810 22277 22629 22189 22760 22353 22336 22309 22560 22608 22478 22505 22679 22679 22694 22580 22766 22504 22798 22437 22832 22097 22728 22189 22958 22075 22742 22247 22941 22107 22828 21940 22942 22048 22710 21952 23150 21954 22681 21856 23214 21824 22528 21809 23123 22076 22657 22065 22922 22200 22935 22029 22945 22209 22589 22186 22946 22231 22698 22309 22816 22186 22567 22448 22599 22081 22372 22426 22677 22124 22489 22438 22380 22055 22261 22440 22498 21918 22487 22400 22832 21915 22501 22165 22767 22010 22857 21972 22857 21792 23005 21890 22917 22005 23175 21787 22934 21601 23180 21660 22803 21512 23189 21597 22696 21544 23168 21708 22691 21672 23123 21743 22544 22121 22771 22065 156 103 91 2337 7087 9649 11641 12105 13869 43573 43651 44123 36919 30980 29355 26464 26912 24615 25371 23669 24992 23216 24364 22839 24320 22930 23553 22727 23798 22866 23309 22770 23568 22736 22675 22412 23513 22435 23079 22454 23371 22382 22962 22285 23149 22400 22848 22662 23152 22304 22215 22388 23047 22344 22848 22574 22650 22389 22402 22853 22432 22308 22195 23080 22195 22389 21888 23223 22103 22387 21793 23223 22132 22187 21975 23132 21959 22213 21824 23244 22328 22135 21824 23168 22273 21848 22023 23061 22208 22020 21980 23017 22433 21975 22258 22936 22161 22336 21675 23238 21719 22460 21764 23177 21786 22482 21719 23217 21826 22528 22192 22443 22565 22407 22432 22483 22369 22345 22198 22657 22470 22423 22379 22168 22807 22169 22650 21951 23024 21977 22131 21747 22638 22288 22245 22206 22625 22279 22153 21844 22613 22069 22327 22066 22670 22088 22368 22094 22757 22190 22392 22199 22592 22200 22480 22100 22215 22689 22157 22307 22070 22834 21986 22384 21760 22760 21911 22528 22008 22707 21944 22661 22016 22133 22546 22260 22357 22334 22333 22311 22176 22349 21781 22864 21833 22523 21929 22905 22151 22369 22005 155 111 4360 9857 12849 14721 15703 16283 17286 17434 43655 40135 32180 27657 27495 25293 24954 23881 23785 23806 23480 23254 23331 23225 23523 22720 23219 22106 23645 22252 23215 22212 23221 22445 23037 22249 22736 22679 22798 22169 22471 22716 22612 22279 22737 22336 23028 22126 22732 21820 23273 21849 22851 22028 22905 22306 22618 22126 22544 22488 22560 22190 22672 22220 22923 21725 22804 21538 23321 21975 22785 21952 22557 22369 22528 22073 22639 22139 22779 22122 22730 21829 23182 21696 22819 21767 22788 22115 22672 22013 22379 22445 22512 22123 22729 21942 23059 21713 22765 21537 23153 21818 22978 21803 22509 22376 22478 22119 22854 22008 22931 21848 22698 21520 23354 21881 22663 21748 22509 22438 22415 22079 22355 22423 22506 22114 22593 21651 23141 21697 22775 21654 23067 21700 22754 21831 22223 22594 22465 22080 22158 21856 22973 21786 22698 21716 23050 21935 22720 21876 22213 22553 22336 22147 22632 21833 23159 21472 22725 21179 23543 21497 22908 21702 22689 22807 21900 22067 21607 23093 21955 22353 22184 21534 23587 21249 22765 21428 23102 22245 22183 22186 21677 22912 22236 22080 22299 21129 23663 21452 22775 21748 581 11953 14432 16886 17282 18891 19347 18665 19680 43629 36178 27811 26485 24521 23543 24696 22791 23516 23310 22245 23413 22648 22803 22665 22342 23254 22370 22905 21735 22449 23175 22574 22484 22488 21914 22922 22515 22571 22329 22093 22881 22409 22358 22321 21936 22886 22254 22352 22441 22276 22276 22817 21954 22704 22010 22528 22497 22201 22249 22579 22198 23040 21973 22583 22010 21965 22519 22489 22076 22515 21678 22871 22257 22301 22223 22571 21780 23093 22072 22553 22043 22299 22240 22875 21851 22749 22008 22452 22528 22748 21745 22693 21905 22521 22380 22330 22050 22697 21537 22832 22253 22344 22023 22550 21440 23080 21959 22448 21971 22418 21940 23072 21610 22751 21777 22159 22129 22853 21582 22763 21805 22313 22295 22768 21843 22734 21718 22795 22296 22407 21985 22627 21421 23070 22232 22339 21958 22491 21440 22823 22149 22325 22008 22512 21463 22991 21890 22440 21885 22532 21689 23095 21504 22673 21739 22565 21770 23177 21584 22865 21857 22396 22058 23129 21494 22691 21864 22376 22059 23029 21502 22787 21925 22250 22016 22937 21627 22784 21817 22165 21925 23111 21828 22513 22065 22566 21596 23019 22211 22325 22074 7682 15213 18831 19717 20376 20104 20972 20421 21248 21269 30992 25456 24672 23165 23128 23336 23282 22135 23150 22402 22259 22164 23739 21923 22283 22461 22566 21419 23486 22468 21889 22491 22339 21084 23195 23251 22391 21644 22855 21429 21712 23123 22954 21236 22775 22075 21865 21836 23408 22733 21627 22486 22340 21268 22765 23127 21860 22052 22581 21933 21676 22961 23143 21269 22401 22200 22032 21690 23396 22602 21805 22471 22016 22020 22432 22757 21863 22427 22104 22107 22224 22781 22408 22000 22393 22166 21812 22464 22573 22011 22375 22305 22051 22133 22711 22479 21955 22480 22279 22329 21907 22759 22285 22045 22193 22391 21691 22560 22450 22304 21777 22656 22096 22121 22204 22848 22106 22236 22265 22380 21780 22423 22474 22597 21812 22752 22019 22346 21838 22923 22042 22481 22008 22215 21677 22887 22385 22388 21755 22608 21835 22316 21760 22919 22197 22341 22025 22554 21660 22384 22354 22675 21666 22813 21773 22265 21901 23080 21645 22518 21991 22561 21541 22808 22320 22307 21847 22651 21936 22224 22247 22817 21686 22800 21884 22497 21621 23094 22075 22264 21981 22663 21595 22433 22217 23012 21504 22639 21864 22400 21471 23017 22157 22408 22006 22604 21760 22379 22307 22968 21579 22805 21928 22528 21587 22965 22157 22357 21888 22759 21436 22343 21928 23285 22256 22474 21779 22785 21603 22220 21911 23175 21888 22413 21898 22582 21949 22395 21893 23107 21992 22385 22005 22417 21549 22490 22308 22704 21543 22676 21965 22518 21426 22561 22375 22595 21608 22663 21952 22474 21669 22854 22333 22430 21948 22705 21815 22285 21858 23255 22290 22320 21671 22706 21860 22332 21889 23001 22338 22349 21853 22699 21861 22106 21733 23123 21820 22183 22192 22395 21352 22120 22905 23168 21367 22251 22237 22435 21195 22657 23072 22836 21190 22425 22341 21523 21148 22457 23059 22752 21213 22437 22187 21870 21020 22310 23017 23065 21280 22263 22377 22261 21240 22549 23210 22816 21155 22793 22121 22052 21102 22938 23014 21905 21591 22754 21833 21780 21661 23544 22521 21616 21995 22602 21643 21751 21630 23179 22793 21946 22140 22272 22278 21777 22496 22637 22418 21864 22349 22064 22166 21751 22315 22717 22261 21952 22401 22231 22107 22087 22621 22467 22048 22386 22330 22083 21951 22586 22788 22290 22033 22217 22337 21892 21953 22362 22901 21892 22336 22244 22186 21729 22281 22537 22567 21748 22419 22073 22336 21619 22778 22322 22345 21847 22669 21869 22074 21821 22820 22237 22208 21947 22559 21731 22035 22115 23032 21736 22423 22215 133 136 107 84 2701 5197 8433 9250 11029 11115 43648 43676 43680 35328 32097 28560 27844 25736 26405 25124 24929 23800 24681 23604 24067 22994 24136 135 103 2041 9463 11693 14008 14568 16768 16679 43574 43666 43664 34457 30721 27659 27631 25705 25365 24483 24861 23785 23984 23617 24368 23116 23662 23079 126 5032 12740 15032 16745 17201 18727 18532 19118 43633 43673 32850 29212 26255 26420 24440 24813 23621 24829 23634 23736 23060 23854 22611 23320 22985 187 7652 14712 17013 18811 18631 20047 20246 20765 19897 43649 30991 27648 25129 25467 24492 24385 23056 24094 22970 23380 22683 23991 22983 23053 22799 23242 8693 16887 19272 20588 20129 21245 20837 21432 20394 21969 30640 25908 24153 24419 23164 22775 23537 24125 22224 23107 22800 22715 21955 24000 22492 22129 22855 22669 21513 23552 23559 22803 21747 23125 22104 21777 22897 23401 21465 22967 21991 21714 22212 23664 21610 22627 22359 22080 22048 23803 21745 22357 22567 22292 21728 23503 22760 21778 22743 22534 21701 22805 22464 22168 22600 21997 22190 22617 22574 22100 22579 22155 22109 22687 22328 22256 22435 22178 22336 22762 22201 22321 22371 22080 22107 22704 22336 22181 22592 21982 22562 22555 22244 22192 22563 21771 22790 22402 22136 22257 22370 21629 22944 22001 22535 22131 22432 22166 23415 22003 22883 22027 22370 22650 22607 22165 22651 21744 23077 22122 22668 22103 22644 21857 23291 21735 22876 21908 22369 22413 22817 21888 22714 21721 22918 22165 22512 22092 22502 21850 23161 21705 22913 21853 22549 22356 22423 22148 22849 21815 23280 21558 22999 21601 22272 22393 22540 21982 22611 21635 23125 21760 22867 21859 22464 22272 22573 22077 22731 21628 23224 21556 22906 21741 22729 22279 22343 22104 22538 22005 22919 21847 22652 21570 22934 22225 22532 21858 22249 22435 22550 22274 22545 21687 23113 21668 22902 22105 22546 22389 22458 22134 22436 21655 23124 21617 22867 21832 22436 22795 21957 22276 21843 22640 22734 21753 22658 21320 23223 22336 22347 22061 21591 23044 21910 22137 22481 21754 23314 21308 22705 21152 23309 22119 22199 22189 21590 23064 22145 22307 22303 21485 23589 21462 22824 21616 21648 23152 21876 22400 22120 22571 22338 22340 22125 21851 22756 22135 22434 22327 22295 22738 22008 22331 21993 22651 22126 22400 22169 21977 22696 22036 22149 22272 22383 22557 22125 22320 21735 22934 21753 22683 21962 22595 22291 22344 22027 22177 22277 22685 21975 22551 21537 23025 21763 22880 21911 22533 22380 22308 22101 22616 21892 22860 21623 22766 21417 23078 21663 22732 21773 22465 22351 22317 22112 22221 21809 23063 21697 22598 21444 23063 21719 22909 22273 22587 22153 22519 21867 22276 22162 22599 21911 22431 21527 23116 21466 22877 21665 22978 21928 22791 21764 22368 22291 22675 21916 22503 21546 23128 21518 22823 21737 22690 22112 22571 21914 22135 22353 22361 22109 22672 21784 23015 21639 22646 21641 22829 21945 22541 21848 22109 22450 22304 22115 22933 21548 23371 21372 22736 21366 22987 22033 22254 21879 21625 23104 21660 22272 22168 21897 23365 21251 22767 21717 22573 22773 21888 22220 85 115 83 869 5118 7810 10568 10411 12049 43576 43671 43680 39464 33173 29403 151 112 7741 11890 15385 15878 17361 17627 18171 43585 43676 43683 35429 31584 28649 180 4547 12595 16637 17383 18929 19099 20335 19855 20471 43652 38042 31744 28625 26969 311 10305 16704 18262 19991 19739 21547 20199 21437 20759 43666 33957 29113 26496 25893 25097 14561 18697 20776 20358 22331 21083 22257 21511 22543 38071 29541 25761 25232 24538 24335 23360 23727 23703 23657 23202 23424 23041 23680 22561 23520 22251 24032 22279 23560 22120 23643 22450 23371 22336 22958 22878 22733 22516 22944 22586 23093 22358 22885 22149 23252 22127 22880 21824 23353 22117 23137 22151 22816 22692 22500 22305 22389 22522 23031 22018 22835 21504 23673 21799 23115 22103 22556 23140 22000 22665 22113 22542 23223 21774 22631 21409 23708 22456 22198 22225 21673 23114 22272 22551 22522 22012 22857 22247 22366 22605 22187 22863 22150 22733 22246 22501 22685 22286 22425 22325 22563 22796 22085 22565 21650 22936 22148 22583 22092 22281 22567 22321 22289 22429 22295 22890 21788 22692 21538 23069 21884 22797 21917 22420 
