# Supplementary material for: An Active Feature Selection Strategy for DWT in Artificial Taste
Source: Hindawi journal article supplement (doi:10.1155/2018/9709505), 2018-01-01
Supplement: f1 [file 9709505.f1.zip › puerTea-low-1.txt]

43452 39852 37671 37799 55 48 9525 15495 17223 19148 19768 20968 21079 21607 20942 21952 22934 22753 20901 21817 22016 23126 21617 21314 22715 23873 22572 21660 22279 22998 22837 21544 22041 23877 23364 21864 21879 22366 23094 22812 21411 22967 23900 23552 21744 22161 22714 22753 22900 22117 23159 22955 23389 22272 22849 22496 23111 22789 22516 22769 23519 22704 22560 22297 22915 22677 23196 22128 23091 22839 23479 22605 22628 22283 23249 22749 22846 22177 23411 22838 22976 22012 23032 22432 23469 22400 22867 22822 23814 22612 22881 22230 23172 22471 23515 22045 22775 22428 23497 22759 23176 22075 23204 22426 23494 22277 22936 22469 23671 22903 23216 22023 23212 22403 23410 22667 22746 22329 23572 22888 23360 21984 23054 22282 23236 22648 23097 22038 23118 22937 23627 22756 22768 22471 23047 22797 23296 22176 23143 22936 23676 22685 22672 22496 22979 22853 23233 22283 22648 22978 24117 23588 22772 21863 22551 22828 23552 22720 21914 21640 22652 23687 24184 22880 22054 21770 22148 22412 23488 23356 21931 21590 22613 23770 24153 22912 21942 22151 22638 23017 22780 23383 22490 22636 10060 16651 18496 19384 19193 19933 19840 20521 20567 21104 29675 26105 24633 24956 23858 23441 23088 23505 22957 23712 22822 23065 22560 23768 23138 23296 22195 23399 22657 23561 22500 22973 22528 23718 22918 23530 22053 23194 22359 23348 22820 23164 22176 23048 22727 23712 22889 23341 22048 23064 22245 23215 22557 23348 22284 23072 22640 23674 22895 23383 22073 23261 22343 23266 22513 23399 22395 22873 22194 23561 23072 23082 22160 22905 22804 23127 22626 23407 22504 22798 22243 23140 22840 23661 22956 23201 22252 23255 22600 23434 22882 22408 21607 22408 23287 24263 23873 22951 21712 22648 22298 23100 23354 22797 21545 21787 22604 24055 23848 23150 22001 22064 22807 22749 23142 22823 22104 22356 23035 22960 23484 22981 22968 22285 22918 22793 22861 22723 23245 22760 22838 22279 23164 23132 23597 22791 22832 22208 22860 22401 23199 22768 23476 22630 22868 22097 22951 22700 23742 22899 23484 22325 22812 22464 23142 22380 23414 22241 22878 22173 23434 22818 23732 22577 22895 22185 23180 22301 23427 22374 22969 22125 23360 22867 23749 22647 23016 22052 23159 22280 22999 22809 23155 22024 22969 22519 23783 22784 23432 22068 23085 21938 17578 19415 21010 20517 21316 20737 21857 21632 22357 32206 25901 23912 24006 23109 23876 23180 23202 22448 23109 22930 23779 23326 23097 21927 22664 22406 23417 23378 22924 21581 21844 23047 24248 23950 23525 22009 22041 22201 22552 23215 23194 21792 21805 22674 23837 24057 23296 21895 22362 22402 22999 23417 22728 22708 22342 23221 23095 23531 22552 22683 22665 22881 22720 23216 22618 22639 22436 23351 23007 22892 22236 22873 22454 23180 22757 22903 22100 23158 22985 23705 22744 22726 22289 23367 22433 23396 22611 23041 21984 22988 22720 23639 22768 23195 21996 23156 21793 23296 22702 23283 22327 22954 22252 23344 22958 23716 22599 22866 22017 23121 22368 23370 22662 23495 22041 22992 22745 23724 22895 23125 22241 23009 22272 23296 22496 23504 22585 23257 22069 23176 22642 23777 22747 22906 22120 23159 22434 23125 22626 23401 22683 22954 22196 22784 22796 23480 23104 23106 22157 22888 22369 22980 22640 23246 22774 22640 21712 22056 22671 24071 23895 23440 22441 21968 22124 22196 22390 23245 23264 22741 21479 21767 22087 23456 24000 24128 23199 21856 21963 22584 22284 23035 23222 23556 22700 22422 22560 22367 23219 23029 23426 15493 19963 20372 21201 21403 21716 21515 22179 22012 22479 25760 24068 23046 23640 23255 23844 23216 23225 22400 22929 22401 23188 22556 23472 22738 23334 22384 22870 22438 23530 22954 23671 22696 23074 22167 23133 22369 23215 22267 23409 22477 23110 22096 22808 22232 23425 22875 23772 22672 23073 21973 23006 22173 23257 22512 23484 22586 23098 22118 22976 22556 23609 22948 23776 22744 23322 22039 22932 22149 23104 22196 23260 22660 23296 22439 23020 22156 22733 22463 23228 23005 23548 22928 23403 22574 22640 22232 23123 22456 22887 22500 23225 22774 23179 22400 22403 21729 22038 22512 23451 23576 24231 23313 22988 22130 22116 21639 22245 22004 22362 22400 22938 22987 23593 22819 22216 21693 21664 22074 23329 23596 24135 24076 24071 23424 22898 22960 22375 22630 22259 22925 22528 22948 22701 23080 22896 23183 22808 23116 22616 22887 22365 22738 22177 22720 22504 23217 22841 23403 23020 23510 22843 23177 22391 22937 22021 22808 22128 23001 22129 23057 22340 23207 22568 23409 22448 23356 22360 23264 22103 23093 21929 22856 21981 22740 21931 22860 22189 23232 22442 23308 22637 23430 22576 23681 22842 23706 22864 23741 22759 23399 22376 20550 20972 21959 21380 22287 21432 22571 21865 22536 26822 24697 22336 23280 22538 22999 22439 23095 22550 23342 22727 23304 22825 23284 22709 23337 22768 23401 22716 23299 22791 23287 22669 23232 22669 23138 22040 22519 22158 22279 21816 22285 21957 22233 21894 22393 22016 22324 21453 21541 21377 21764 21393 21530 21426 21753 21573 21703 21763 21852 21847 21780 21935 22278 22329 22288 22605 22287 22806 22152 22661 22239 22680 22486 22675 22412 22738 22236 22696 22156 22657 22204 22895 22344 22952 22277 22656 22374 22975 22414 23035 22509 23251 22504 23303 22606 23331 22679 23351 22695 23409 22711 23397 22507 23401 22513 23521 22557 23544 22508 23388 22674 23456 22631 23360 22601 23488 22589 23536 22498 23401 22552 23405 22574 23447 22589 23353 22695 23340 22573 23419 22567 23432 22205 23151 22309 23319 22344 23280 22469 23037 22520 23098 22565 23023 22417 22968 22392 23244 22692 23378 22657 23259 22614 23237 22553 23096 22592 23079 22647 23183 22757 23146 22816 23407 23216 23560 23168 23591 23349 23555 23204 23332 23035 23374 23121 23371 23226 23472 23309 23335 23216 23408 23362 23488 23325 23371 23312 23316 23168 22822 23179 20704 22592 22413 22826 22601 22807 22611 22808 22676 23043 23737 23467 22849 23323 22672 23321 22612 23205 22814 23200 22663 23191 22635 23361 22515 23350 22432 23319 22624 23109 22477 23072 22414 23168 22372 23340 22512 23379 22537 23485 22545 23479 22496 23312 22514 23317 22624 23356 22556 23264 22487 23377 22549 23445 22580 23529 22595 23404 22557 23270 22579 23272 22621 23432 22574 23517 22520 23396 22513 23508 22537 23460 22576 23348 22602 23296 22600 23169 22672 23304 22673 23140 22624 23289 22732 22951 22429 22897 22378 22900 22336 22984 22477 23026 22370 22752 22240 22403 21908 22135 21897 21962 21504 21900 21302 21578 21326 21481 21540 22091 22314 22768 22703 23016 23598 24033 23872 24169 23944 24119 23884 23901 23417 23608 23136 23557 23093 22465 22930 22528 23113 22599 22906 22711 22903 22696 22936 22730 22976 22352 22628 22112 22597 22075 22705 22038 22665 22192 22593 22186 22657 22016 22651 22025 22652 21976 22943 22170 22945 22156 22874 22027 22702 21980 22744 21957 22893 21990 22830 21904 22824 21978 22919 22070 23001 22240 23026 22406 23153 22372 23247 22427 23336 22535 23553 22191 23032 22156 23131 22256 23044 22456 23178 22377 23208 22480 23313 22391 23352 22504 23533 22722 23535 22672 23605 22737 23488 22908 23500 22968 23564 23010 23431 22839 23343 22798 23509 22788 23534 22957 23385 22905 23352 22804 23334 22816 23190 22688 22948 22380 23028 23207 23223 22809 22868 22630 22723 22583 22749 22694 22792 22331 22302 22688 23001 22886 22791 22427 22468 22077 21961 21554 21703 21450 21594 21685 21826 22724 22167 22667 22221 22698 22321 22679 22371 22694 22263 22557 22348 22560 22228 22535 22200 22859 22203 22666 22110 22766 22136 22664 22139 22668 22016 22621 22096 22960 22328 22954 22160 22848 22128 22680 22082 22887 21954 22705 21945 22761 21889 22817 21942 22848 21902 22796 22025 22748 22055 22735 22096 22772 21993 22745 21956 22902 22026 22937 21934 22839 21965 22784 21962 22710 21952 22786 22085 22805 21957 22684 21885 22864 21932 22814 21813 22829 21952 22768 22080 22679 22040 22728 22117 22702 22057 22814 22135 22700 22140 23136 22692 23316 22816 23405 22944 23394 22732 23496 23144 23503 23175 24073 23440 23905 23680 24020 23703 24183 23862 24091 23808 24202 23830 24160 23710 23950 23889 23964 23671 23751 23670 23992 23665 23746 23486 23656 23238 23312 22857 22812 22567 22583 22481 22208 22602 22068 22583 22132 22620 22272 22633 22249 22632 21821 22408 22176 23031 22361 22821 22324 22840 22428 14512 17891 19617 19620 20443 20250 21152 20408 21230 39982 28180 24897 24608 23392 23684 22810 23420 22417 23170 22234 22989 22124 23081 22181 23136 22142 23083 16944 20460 20405 21440 21058 22045 21623 22434 21788 33223 25750 25216 23608 24216 22957 23601 22694 23385 22189 22785 22133 22996 22247 23089 22103 23367 10156 20104 20520 21872 21254 22217 21397 22347 21656 22506 27599 24941 23563 23699 22901 23224 22505 23095 22356 22833 22225 22725 22229 22823 22415 23033 22743 18018 21329 22836 22958 23576 23253 23749 23285 23328 22716 25103 22861 22450 21831 22070 22226 22553 22722 22509 22205 22788 22709 22873 23016 23315 23399 23479 21361 22485 22528 22480 22728 21877 22497 21888 22318 21953 23427 22528 22802 22584 22968 22632 23110 23081 23468 23120 23523 22821 23478 22921 23368 22680 22762 22208 22710 22085 22945 21952 22967 22394 23112 22439 23159 22542 23296 22656 23417 22517 23277 22324 23041 21940 22892 22120 23121 22215 23136 22423 23214 22529 23515 22732 23587 22791 23644 22825 23669 22653 23395 22198 22883 22124 22839 22011 22791 21975 23101 22130 23007 22241 23182 21978 23207 22265 22913 22345 22957 22346 22925 22283 23049 22323 22963 22562 23106 22608 23248 22641 23192 22672 23200 22707 23148 22695 22957 22488 22829 22161 22306 21860 21603 21292 21687 21540 21951 21925 22054 22035 21994 22066 22299 21904 22359 22887 22877 22801 22987 23089 23491 23433 23532 23495 23589 23132 23278 23264 22880 23284 22765 23275 22807 23225 22885 23368 23025 23372 23104 23333 23006 23298 22712 23367 22695 23363 22688 23434 22529 22900 22220 22764 22240 22826 22104 22864 22057 22867 22089 22832 21988 22681 21993 22809 21888 22949 22163 22981 22180 22999 22141 23048 22139 23278 21752 23020 22576 22976 22169 22995 22114 23030 22208 23028 22181 23141 22311 23124 22257 23170 22408 23174 22625 23335 22635 23368 22389 23364 22314 23213 22350 22874 22073 22768 21972 22709 22035 22989 22325 23072 22450 23163 22697 23258 22622 23330 22807 23453 22724 23543 22982 23371 22865 23421 22897 23548 23058 23781 22823 23073 22476 22471 22007 22459 22101 22144 21898 22224 21909 22289 21720 21852 21532 21654 21848 22275 21991 22263 22237 22402 22023 22069 22118 22367 22068 22378 22613 22872 22928 22574 23048 22565 23227 22704 23116 22744 23008 22726 22856 22535 22567 22192 22489 22067 22586 22115 22709 22266 22963 22294 22898 22510 23147 22684 23321 22692 23622 22788 23568 22791 23552 22838 23528 22791 23381 22608 23424 22613 23200 22429 23057 22021 22880 21943 22837 21975 22992 22234 22935 22209 23162 21888 22404 22208 22983 22202 23209 22391 23253 22445 23475 22554 23334 22423 23283 22667 23281 22278 22968 22138 23026 22063 22807 21805 22697 22016 22737 21934 22760 21878 22825 22046 22706 22254 23188 22564 23321 22597 23400 22791 23360 22917 23462 22953 23509 22880 23470 22737 23459 22714 22890 21958 22304 21845 22071 21640 21959 21607 21809 21533 21889 21609 21889 21618 21769 21548 21893 22032 22220 22006 22096 21985 22258 22116 22320 22273 22326 22273 22439 22398 22643 22631 22599 22871 22497 23177 5365 17517 19058 20218 20236 20801 20661 21143 20680 21210 31234 26308 24337 24122 23390 23754 17111 20656 20791 21837 21547 22128 21539 22222 21463 34624 25394 24272 22953 23367 22586 17620 20136 21565 21300 22229 21376 22173 21419 22198 21359 25712 23098 23754 22660 23395 16869 21800 21792 22848 22150 23109 22359 23317 22456 23339 25115 24291 22991 23656 22679 23246 21260 22778 22099 22817 22281 22914 21756 22475 21615 24961 22500 23109 22125 23111 22204 22859 22347 22743 22184 22940 22176 22881 22145 22835 22503 23265 22331 22928 22353 22977 22721 22897 22228 22819 22192 22817 22288 22702 22019 22296 21736 21902 21592 21981 21550 21830 21520 21913 21928 22348 21991 21888 21830 21888 21745 21802 21767 21966 21920 21946 21968 22151 22130 22317 22392 22331 22169 22311 22225 22635 23029 22048 22858 22551 22760 22513 22944 22383 22868 22440 22676 22402 22808 22375 22874 22409 22680 22094 22744 22031 22801 22117 22752 22148 22805 22256 23153 22475 23133 22196 23164 22577 23414 22764 23560 22737 23544 22880 23500 22680 23566 22789 23599 22712 23624 22656 23476 22704 23376 22515 23306 22359 22898 
22590 22896 22607 22935 21629 21177 22162 23494 22336 21250 21674 22026 22671 22151 21942 21915 22771 22419 22260 21707 22144 22276 22272 21800 22007 22288 22718 22295 21953 21662 22330 22002 22720 21655 22093 22100 22848 21717 21840 21187 22007 21711 22131 21222 22231 22069 22393 21154 22191 21644 22513 21516 22045 21575 22828 21865 22016 21568 22469 22022 22150 21539 22588 22246 22778 21536 22247 21835 22549 21922 22089 21585 22612 22279 22255 21567 22272 22021 22547 21613 22281 22536 22973 21616 21619 21877 22433 22220 21504 21283 22700 23232 22833 21346 21602 21728 22355 22712 22153 20936 21845 22914 23493 21616 21487 21061 22281 22665 22055 20925 21900 23258 23334 22049 21408 22086 21896 22636 22074 22087 21786 22486 22482 22743 22212 22039 21948 22216 22217 22512 21790 22210 22283 22909 22409 22381 21894 22340 22305 22585 21760 22290 22195 22981 22087 22064 21825 22414 22016 22795 22059 22272 21651 22988 22381 22586 21469 22379 21723 22599 22063 22791 21615 22273 22080 22864 22352 22809 21708 22395 21782 22691 21901 22712 21675 22347 21979 23095 22224 22603 21718 22289 22308 22744 51 5998 7031 9515 10351 12283 12357 13409 12738 13727 33498 30040 27419 26167 24281 24784 23987 24066 22837 22896 22512 22976 22518 23024 21932 22592 22599 23357 21818 21865 22199 22647 22804 22391 21217 21855 22752 23868 22837 21901 21303 22104 21984 22763 22647 22128 20978 21675 22725 23557 23349 22733 21211 22056 21873 22654 22589 22081 22123 21923 22680 22621 22741 22226 22019 21974 22243 22137 22472 22181 22188 21899 22656 22589 23079 22299 22271 21762 22499 21993 22492 22164 22755 21881 22183 21790 22969 22432 22625 21609 22407 21325 22536 21970 22884 21833 22317 21579 22892 22412 23011 21942 22167 21933 22401 21931 22816 21976 22340 21632 22744 22309 23083 22208 22369 21707 22599 22111 22763 22117 22449 21524 22577 22146 23176 22341 23031 21867 22331 21925 22579 21959 22673 21874 22259 21687 22440 22311 23033 22456 22603 21623 22118 21804 22365 21949 22663 22299 22596 21611 21841 21976 23431 23221 23062 21760 21557 22209 22234 22551 22865 21745 21384 21202 22466 23271 23597 22383 21456 21786 22092 22592 22837 21905 21369 21083 22438 22909 23605 22779 22087 22060 21811 22262 22199 22663 22152 21995 21914 22386 22567 3014 9696 12602 13720 15367 15453 16446 16555 17168 16635 33971 29320 27488 25406 24901 23254 23367 23081 23029 22560 23168 22264 22517 21976 23014 22612 23045 21920 22381 21817 22632 21961 22979 22048 22406 21598 22559 22338 23183 22247 22203 21735 22556 21834 22832 22083 22555 21543 22673 22370 23069 21943 22327 21833 22394 22109 22851 21900 22401 21538 22752 22302 23053 21837 22196 21621 22439 21984 22725 21723 22324 22228 22875 22198 22341 21696 22640 21986 22824 22129 22305 21678 22630 22446 22993 21967 22128 21529 21655 22025 22776 22327 21894 21106 22017 22823 23466 22412 21127 20453 21130 21302 21268 21731 22127 21288 20532 20464 21807 22479 22740 21859 21035 20484 21072 21358 22216 21767 20959 21239 21100 22016 21670 22217 21616 21510 21070 21591 21165 21536 21524 21952 21273 21248 21251 22034 21845 22279 21444 21597 20979 21694 21248 21808 21528 22073 21444 21648 21173 22086 21762 22366 21685 21818 20973 21664 20967 21830 21610 22484 21500 21736 21008 21789 21347 22361 21692 22139 21158 21681 21399 21793 21181 22064 21495 22043 21058 21600 21283 22280 21841 22267 21516 21604 20925 21850 21287 21695 21305 22113 21243 21573 17779 19531 19572 20681 20293 21045 20416 20597 19908 20318 28548 26225 24290 24080 23128 23004 22191 22791 22285 23173 21615 22048 21465 21458 20898 21541 20883 21602 21573 22029 21312 20877 20595 21371 21970 22775 22730 22535 21928 20874 20920 21529 21159 21760 22099 22323 21587 20951 20601 21419 22148 22871 22296 21687 20759 20862 21029 21009 21337 21640 22039 21595 21843 21011 21538 21464 21902 21985 22357 22212 22167 21696 21713 21506 21767 21952 22051 21663 22284 21927 22341 21703 21751 21370 21840 22029 22683 22191 22784 22077 22709 21928 22249 21855 22308 21111 22300 21911 22656 23155 23485 22360 22647 21771 22708 22021 23096 22589 23296 22531 23012 22214 22471 21732 22533 21928 22577 21912 22779 22030 22656 22007 22530 21534 21607 21142 21682 21640 22367 21896 22613 22057 22445 21627 22085 21245 21911 21473 22090 21660 21801 21625 22130 21734 22142 21918 22362 21985 21928 21609 21893 21388 21856 21511 22192 22053 22520 22306 22765 22503 22425 21760 21944 21052 21303 21340 21505 21568 21952 21773 21475 21788 21943 21736 22098 22217 22240 22464 22819 22669 22841 22477 22635 22416 22165 21713 21580 21210 21049 20922 21032 17037 18555 19870 20248 20863 20615 21175 21005 21399 21255 24393 23717 23629 23029 23303 22710 22944 22532 22636 21718 22390 21664 21920 21725 22072 21685 22148 21543 22109 21625 22149 21744 22146 21763 22166 21900 22368 21776 22277 21623 22313 21875 22247 21597 22410 21615 22091 21797 22260 21804 22253 21765 22304 21576 22516 21690 22272 21754 21576 21047 22720 21537 22682 21959 22323 21800 22082 21575 22712 21778 22386 21642 22535 22169 22298 21670 22523 21588 22098 21705 22016 21743 22220 21344 21965 21225 22000 21687 22105 21541 21677 21325 21657 21279 21839 21291 21463 21019 21253 20907 21047 20722 21047 20935 21142 20825 20847 20678 20992 20726 20775 20781 20844 20712 20807 20800 20809 20716 20788 20940 21009 20885 21068 20881 21040 20898 21112 21617 21413 22076 21661 22234 21914 22230 22211 22199 22167 22178 22271 22249 21952 22291 21954 22384 22060 22393 21888 22420 21820 22011 21519 22140 21563 22144 21685 22311 21681 22225 21862 22221 21813 22239 21698 22240 21621 21927 21428 22037 21525 22192 21483 22255 21753 22125 21668 22126 21619 21931 21516 22136 21488 22186 21505 22046 21481 22023 21383 21981 21546 22089 21504 21970 19589 20747 20352 21107 20621 21377 20775 21410 20800 23681 22475 22617 21961 22315 21861 22205 21769 22247 21649 22012 21589 22103 21644 22103 21584 22099 21676 22218 21543 22159 21813 22096 21742 22064 21657 21220 21132 21258 20975 21152 21024 21441 21143 21409 21146 21251 21043 21411 21526 21400 21156 21313 21042 21159 20980 21220 21054 21105 20871 21186 21735 21549 21968 21506 21956 21579 21844 21512 21760 21653 21825 21528 21830 21783 21975 21723 22089 21607 21968 21517 22016 21564 21865 21455 21990 21634 22063 21413 22276 21861 22308 21545 22294 21750 22131 21774 22351 21625 22173 21799 22357 21165 22577 21470 22239 21573 22233 21644 22241 21859 22493 21989 22480 22017 22541 21813 22417 21750 22406 21623 22116 21437 21963 21487 21969 21435 22000 21539 22065 21399 21991 21431 22088 21401 22176 21613 22120 21392 22087 21696 22300 22000 22327 21999 22360 21989 22416 22079 22409 22000 22346 21996 22389 22053 22313 22187 22720 22432 22699 22372 22887 22511 22801 22376 22434 22077 21928 21451 22470 22301 22292 21996 22311 21912 21637 21203 21195 21233 21366 21058 21272 21001 21193 20967 21133 21440 21640 21192 21396 21781 21392 21984 21700 22051 21533 22005 21529 21961 21520 21854 21706 21765 21745 21851 21754 22023 21829 22238 21981 22209 21936 22407 22152 22487 22135 22535 22010 22494 21949 22448 22025 22605 22102 22498 22114 22521 22053 22551 21925 22613 22116 22488 22024 22687 21990 22736 21964 22661 22016 22695 21921 22582 22021 22697 21927 22610 21969 22644 21929 22658 21701 22433 21835 22441 21684 22426 21828 22436 22023 22488 21898 22599 21772 22329 21692 22229 21469 22061 21545 22201 21513 22050 21770 22016 21640 22084 21626 22105 21629 22024 21660 22169 21597 22036 21607 22229 21867 22234 21824 22150 21780 22013 21722 22202 22016 22218 21957 22133 21665 21908 21632 21783 21584 21784 21423 21818 21485 21660 20832 21664 21519 21791 21496 21667 21600 21985 21457 21687 21639 21749 21754 21588 22163 21943 22288 21751 22295 21840 22214 21742 22112 21760 22029 21794 22058 21959 22215 21805 22201 21767 22150 21744 22330 21812 22295 21984 22404 22094 22514 22013 22455 21865 22533 21982 22505 21792 22369 21862 22266 21671 22091 21448 22125 21520 22296 21552 22307 21702 22324 21687 22267 21819 22147 21509 22077 21485 22032 21445 22096 21547 22114 21369 22092 21333 21942 21478 22054 21458 22092 21445 22062 21683 22308 21836 22533 21860 22605 22047 22797 22102 22681 22394 22861 22309 22724 22240 22730 22254 22551 22151 8894 10407 12884 13230 14289 14113 14886 14570 15246 37637 31256 27285 25967 24365 24083 23063 22877 22647 22998 22253 22767 22499 22967 22488 22882 22443 2670 10752 14687 16032 17181 17550 17952 17721 18014 17881 34674 28499 25719 23837 23159 22369 22336 22149 22187 22866 22553 22978 22565 23157 22797 23101 22802 9077 14797 17275 18455 19115 19415 19783 19675 19956 19560 30742 26356 24812 23345 23347 22822 22904 22080 22715 22199 22707 22103 22679 22073 22738 22327 22830 13993 18176 18992 20260 19929 20743 20135 20980 20141 20942 26487 25037 23320 23632 22788 23361 22727 23292 22620 23126 22289 22903 22157 22767 21851 22485 21553 18673 19484 20900 20711 21426 21221 21872 21035 21957 26199 24651 22905 23289 22427 23001 22344 22935 22157 22593 21847 22412 21725 22231 21700 22173 21728 22386 22104 22505 22222 23047 22471 22933 22310 22778 21992 22422 21585 21702 21201 21442 21095 21912 21481 22116 21691 22376 22291 21746 21579 22040 21936 22171 21868 21849 21126 21197 20620 20608 20328 20573 20480 20689 21335 21694 21991 21572 22035 21685 22173 21872 22237 21940 22173 21832 22229 21790 22183 21799 22150 21686 22187 21733 22151 21715 22040 21547 21657 21178 21437 21083 22141 22168 22286 21952 21936 21344 22003 21605 22032 21248 21843 21310 22224 21504 22153 21463 22184 21456 22218 21655 22120 21539 22186 21723 22295 21613 22294 21729 22422 21815 22368 21877 22486 21699 22470 21714 22511 21928 22343 21949 22475 21865 22555 21762 22535 21911 22428 21690 22325 21581 22293 21540 22007 21508 21913 21500 21993 21537 21827 21522 22093 21755 22137 21667 22117 21696 22155 21607 22112 21719 22167 22149 22531 22377 22800 22599 23300 23058 23210 23216 23485 23236 23362 23093 23437 23146 23193 23089 23258 23029 23106 22862 22929 22421 22629 22332 22395 21883 22164 21888 21728 21420 21429 21872 21591 21964 21447 21769 21541 22052 21725 22144 21656 22272 21767 22039 21681 22225 22046 22354 22077 22401 22106 22487 21952 22349 21949 22320 21947 22327 21742 22317 21856 22225 21419 21997 21504 22032 21541 21916 21363 22018 21449 22055 21534 22202 21556 22261 21495 22138 21547 22229 21723 22331 21833 22810 22515 23043 22420 22956 22434 23045 22422 22918 22290 22784 22225 22567 21944 22307 21884 22313 21492 22108 21444 22239 21421 22095 21610 22329 21560 22697 21746 22330 21717 22296 21879 22508 21992 22456 22031 22485 22102 22481 22075 22564 21990 22403 21897 22449 21792 22177 21783 22019 21556 21533 21181 21307 21049 21274 21078 21504 21594 22619 22581 22962 23191 23533 23236 23386 23218 23413 23196 23458 23109 22656 21955 21860 21534 21495 21142 21229 21079 21096 21192 21327 21753 21573 22112 21713 22041 22071 22055 21826 22009 21971 22115 21845 22071 21913 22185 21936 22307 21976 22428 21955 22599 22177 22482 22075 22360 22071 22528 21881 22383 21705 22208 21554 22085 21587 21938 21467 22176 21537 22114 21681 22336 21741 22363 21857 22605 21870 22536 21985 22584 22007 22612 22131 22773 22274 22801 22248 22788 22173 22891 22130 22837 21979 22695 22119 22647 21974 22368 22053 22333 21713 22114 68 9167 11141 13476 13565 14720 14306 15399 15261 16286 24737 26899 24900 24529 23555 23589 14905 16982 17398 18412 18176 18805 19728 19872 19832 35204 28518 26823 24386 24065 22813 11965 16109 17932 18454 18955 19191 19748 19880 19937 34679 28687 25645 25019 24064 23872 14839 18552 19659 20481 20381 20647 20573 20608 20423 20265 26240 23801 22688 22437 21942 17029 19131 20212 21076 21000 21511 21080 21840 21671 21994 25684 24451 23411 23345 23025 23097 22749 23000 22583 22978 22507 23015 22470 23034 22539 22940 22662 23044 22595 22990 22473 23055 22444 23120 22487 22944 22405 22935 22448 22953 22322 22891 22215 22791 22140 22872 22091 22791 22132 23067 22290 22893 22180 22941 22184 22716 22192 22893 22146 23021 22076 23020 22259 22960 22331 23001 22304 22838 22349 22947 22400 22927 22319 22987 22152 23219 22185 23124 22274 23093 22327 22976 22255 23080 22396 22855 22291 22898 22315 22731 22096 22597 21798 22236 21750 22240 21732 22231 21581 22208 21681 22055 21619 22151 21600 22145 21728 22076 21621 22144 21980 21852 21563 22345 22080 22382 22138 22437 22341 22743 22569 22862 22671 22829 
21711 21496 21853 21330 21784 21415 22281 21540 21698 21618 22390 21834 21676 21323 21875 21683 22309 21399 21839 21937 22439 21455 21803 21424 22106 21864 21897 21165 21857 22002 22317 21543 21622 21421 21826 21895 21965 21376 22120 22069 22245 21360 21635 21928 21935 21837 21945 21104 21799 22171 22904 21317 21120 21236 21579 22248 22217 20667 21071 21949 23270 22487 21395 20996 21551 21910 22584 21079 20800 21641 22965 22737 21773 20887 21453 22168 21984 21864 21446 21853 21540 22245 21427 21635 21751 22370 21554 21701 22035 21910 21726 22059 21132 21914 21814 22427 21698 21755 21405 21864 21597 22176 21463 21708 21741 22411 21624 21786 21373 21908 21657 22248 21266 21686 21568 22382 21845 21809 21248 22097 21431 22228 21641 21821 21127 22062 21947 22345 21341 21684 21434 21877 21810 22057 21261 21785 22016 22272 21206 21898 21463 21992 21857 21875 21318 21973 22114 22449 21628 21257 21251 21548 21747 22247 20906 20837 21783 22986 22787 22215 21032 21396 21198 21905 22401 22457 21095 20712 21138 22470 22912 22208 21002 21134 21508 21766 22415 22142 21419 21339 21756 21891 22274 21890 14758 17435 18950 19567 20000 20153 20007 19989 20327 35009 26343 23660 22642 22201 22217 22165 21991 21412 21818 21913 22504 21932 21739 21505 21888 21685 22192 21388 21736 21875 22358 21737 21704 21426 21865 21587 22326 21603 21724 21290 22181 22058 22407 21636 21743 21563 21950 21480 22260 21777 21937 21296 22036 21914 22439 21713 21687 21390 21913 21518 22304 21579 21801 21171 22005 21920 22493 21853 21971 21401 21731 21641 22140 21803 21866 21207 21786 21745 22456 21978 22176 21273 21792 21472 21893 21799 22163 21291 21293 21542 22744 22812 22637 21248 21152 21291 21376 21808 22635 21520 20947 20704 22192 22730 22976 22074 21076 21105 21520 21525 22465 22084 21324 20551 21541 22809 22663 22021 21483 21577 21595 21655 21780 22074 22006 21545 21487 21550 21910 22177 22154 22016 21389 21871 21612 21879 21801 22156 21730 21596 21225 21834 21764 22315 22069 22207 21435 21640 21538 21878 21528 22073 21757 21931 21314 21655 21671 22476 21832 21829 21317 21838 21429 21876 21732 22321 21411 21636 21372 22488 21863 22081 21175 21911 21541 21900 21632 22280 21604 21816 21255 22177 21929 22401 21544 21577 21364 21944 21457 22311 21768 12304 18135 20081 20444 21457 21184 21463 20483 21189 20912 27034 23829 23128 22052 21931 21645 22352 22090 22352 21384 21629 21495 21734 21797 22321 21348 21080 20967 22236 22821 22976 21785 21213 21092 21749 21368 22485 22301 21590 20487 21918 22753 23101 22314 21194 21050 21854 21537 22601 21824 20961 20749 22041 22375 22133 21842 21383 21824 21616 21979 21970 21868 21460 21574 21882 22244 22047 21713 21440 21765 21839 22205 21643 21575 21440 22068 22147 22192 21338 21713 22092 21896 21890 22121 21442 21604 21348 22278 22048 22312 21508 21696 21457 21948 21652 22194 21732 21943 21274 22125 21893 22439 21892 22031 21416 21777 21491 22032 21782 22237 21393 21677 21277 22121 21853 22346 21381 21624 21341 21960 21691 22322 21764 21748 21138 21836 21660 22416 21910 22347 21506 21812 20832 21926 21728 22360 21654 21765 21225 21784 21547 22348 22101 22313 21450 21618 21409 21895 21676 22167 21779 21958 21203 21701 21805 22536 22713 22695 21728 21184 20884 21680 21303 22066 22283 22119 21049 20786 21104 22425 22894 23175 22272 21421 20841 21360 20974 21805 22343 22349 21513 20853 20600 21489 22042 22435 22242 22082 21840 21424 21932 21650 17783 20145 21096 21393 21401 21112 21114 21169 21585 30739 24471 22925 22278 21658 21922 21452 21907 21810 22211 21987 22071 21477 21655 21495 22081 21991 22475 21828 21837 21339 21817 21615 22016 21611 22213 21760 22093 21321 21667 21433 22318 22031 22459 21813 21888 21340 21801 21553 21917 21568 22333 21847 21866 21203 21833 21547 22341 21963 22353 21685 21760 21357 22010 21410 21923 21529 22341 21769 22129 21260 21780 21308 22032 21837 22458 21968 22360 21735 21895 21288 21682 21600 21891 21539 21900 21731 22115 21564 21717 21297 21583 21316 21928 21944 22647 22624 22799 21731 21294 20752 21198 21088 21515 21637 22083 22108 22580 22176 21739 20901 20833 20672 21413 21767 22933 22981 22992 22354 21417 20904 21142 21218 21355 21236 21578 21893 21719 22011 21959 22167 22000 21539 21265 21405 21510 21742 21896 22062 22021 22237 22085 22246 22037 22215 21869 21864 21497 21717 21525 21900 21522 21799 21456 21908 21745 22122 21794 22195 21738 22005 21201 21540 21214 21863 21595 22219 21671 22279 21857 22465 21888 22472 21977 22407 21842 22257 21774 21957 21440 21921 21313 21718 21234 21749 21351 21857 21341 21625 21395 21825 21454 17083 20253 21596 21351 22007 21585 22173 21668 22126 21536 24763 22273 22208 21585 21859 21405 21760 21286 21637 21355 21948 21649 21872 21590 22118 21622 22077 21632 22240 21789 22126 21792 22231 21999 22325 22432 23011 22609 23022 22838 23081 22912 23143 22712 23076 22791 23050 22809 22955 22837 22944 22729 22908 22721 23021 22875 23072 22970 23190 22919 23129 22952 23105 22886 22497 22244 22227 22336 22121 22327 22161 22188 22289 22204 22160 22267 22189 22251 22104 22330 22152 22364 22075 22282 22072 22322 22193 22393 22048 22272 22036 22303 21905 22263 21868 22126 21852 22048 21585 22052 21681 22022 21795 22240 21792 22134 21591 22124 21509 21981 21505 21979 21547 21923 21521 22004 21419 21912 21479 22254 21665 22241 21664 22100 21568 21944 21535 21792 21355 21819 21331 21806 21058 21699 21183 21723 21104 21739 21158 21560 21195 21587 21191 21589 21237 21638 21251 21616 21414 21906 21433 21728 21362 21772 21228 21633 21179 21676 21184 21480 21145 21305 20802 21046 21013 21669 21472 21679 21466 21656 21111 21020 20787 21226 21053 21333 21105 21783 21499 21450 21229 21637 21449 21600 21260 21415 21579 21781 21975 21760 21906 21686 20852 21263 21744 21700 21890 21797 21838 21735 21752 24169 22379 21720 21808 21423 21687 21320 21657 21445 21797 21523 21778 21549 21875 21381 21749 21383 21640 21316 21600 21271 21602 21229 21641 21202 21763 21394 21980 21384 22054 21443 22069 21671 22129 21745 22080 21651 22021 21744 22295 21797 22313 21747 22205 21561 22017 21639 22084 21508 21895 21525 22210 21721 22163 21543 21993 21543 22172 21628 22215 21537 22103 21592 22242 21805 22227 21828 22154 21805 22184 21780 22243 21750 22207 21744 22148 22072 22401 22050 22437 22016 22404 22152 22409 22204 22493 22444 22989 22748 23210 22784 23099 22793 23213 22908 23064 22775 22886 22708 22418 21639 21477 21075 21413 20948 21048 21112 21224 21033 21534 21149 21651 21016 21511 21271 21451 21588 21653 21877 21656 21796 21671 21808 21696 21713 21632 21757 21575 21637 21683 21889 21798 22071 21926 22080 21737 22179 21939 22111 21928 22041 21832 22196 21836 22197 21809 22243 21904 22232 21857 22171 21900 22176 21777 22151 21730 22117 21608 22262 21749 22187 21653 22108 21691 22055 21485 21975 21494 21980 21479 21896 21424 21926 21420 21924 21483 22048 21528 22048 21590 22123 21486 21963 21449 22053 21432 21923 21351 21975 21458 21975 21427 21900 21445 21903 21472 21847 21527 21863 21397 21897 21405 21795 21337 21687 21265 21713 21157 21591 21513 21717 21355 21577 21184 21626 20986 21522 21036 21447 21079 21430 20789 21186 21059 21259 21052 21440 21176 21360 21032 21401 21319 21568 21403 21305 20937 21232 21256 21537 21469 21941 22254 22346 22299 22741 22689 22104 21755 21881 22028 21881 22042 21973 22064 21883 21928 21946 22039 22080 22037 22120 22085 22225 21937 21744 22132 22054 22176 21904 22266 21974 22062 22006 22305 21973 22071 21615 21926 21671 21947 21684 22132 21922 22324 21851 22088 21854 22237 21905 22389 21958 22542 21993 22511 21948 22433 22018 22472 21989 22481 21938 22458 22043 22536 21952 22475 21936 22548 22036 22481 21965 22455 21956 22320 21873 22135 21881 22176 21833 22544 21900 22389 21920 22474 21927 22290 21762 22245 21981 22343 21907 22244 21895 22199 21719 22157 21677 22019 21296 21564 21255 21650 21288 21733 21313 21739 21227 21660 21248 21597 21484 21808 21301 21754 21308 21600 21211 21506 21123 21570 21274 21372 21252 21994 21204 21549 20905 21321 21293 21849 20867 21980 21272 21378 21297 21618 21225 21496 21512 21654 21816 21873 21893 21876 22129 21935 22103 22022 22033 22068 22003 22039 21812 21804 21643 21681 21723 21597 21644 21416 21592 16445 18957 19290 19714 19812 20244 19985 20448 20295 30038 24628 23521 22663 22673 22165 22444 22080 22432 22131 22573 21843 22208 21685 22129 21638 22123 11331 18791 19743 20787 20746 21176 20684 21256 20832 21393 26596 23852 22373 22400 21663 22097 21644 22039 21489 22127 21812 22305 21891 22155 21600 22149 21552 16484 19629 20896 20827 21453 20805 21378 20838 21400 20994 24707 22599 22464 22179 22364 22179 22370 22110 22503 22113 22440 21907 22265 21687 21964 21219 21536 18225 20218 20348 21126 20956 21326 21052 20691 21040 29592 23224 22745 22478 22733 22449 22272 21604 21410 20993 20985 20608 20787 20512 20931 20946 21262 21593 21146 22022 21963 21883 21928 22279 22121 22193 22124 24467 22713 22250 22036 21785 21639 21685 21440 21712 21640 21784 21802 21879 21523 21814 21520 21826 21783 22092 21728 22153 21697 21950 21527 21606 21350 21584 21313 21721 21413 21826 21451 22088 21843 22392 21988 22441 21824 22105 21745 22131 21450 21795 21276 21602 21269 21873 21624 22109 21555 21881 21404 21881 21559 22121 21714 22206 21734 22242 21901 22396 21715 22144 21655 22188 21532 22082 21446 21831 21440 21787 21356 21696 21428 21714 21221 21644 21204 21640 21292 21729 21447 21909 21488 21892 21546 22000 21840 22199 22016 22705 22534 22982 22790 23056 22600 22605 22109 22315 21665 22008 21669 22023 21716 21806 21418 21957 21198 21137 21012 21296 21048 21073 20808 21013 20800 21060 20885 20869 21117 21398 21495 21348 21539 21542 21529 21402 21498 21497 21746 21589 21761 21523 21704 21576 21729 21504 21792 21517 21799 21543 21858 21696 21879 21671 21973 21731 22063 21547 22006 21744 21960 21735 22108 21698 22180 21787 22223 21719 22257 21785 22182 21653 22171 21752 22043 21622 22039 21543 21975 21547 21825 21389 21833 21314 21681 21254 21793 21136 21633 21209 21702 21166 21606 21367 21824 21484 22112 21657 22295 21637 22331 21959 22461 21984 22511 21990 22381 22071 22089 21543 21853 21467 21760 21391 21622 21237 21607 21288 21641 21288 21794 21355 21812 21334 21832 21508 21651 21947 22020 21362 21689 21453 21825 21610 22040 21672 21987 21918 22220 21844 22077 21818 22304 22238 22575 22286 22280 21941 22224 21760 21760 21527 21730 21464 21257 20912 21138 20705 20817 21333 21388 21449 21394 21664 21569 21719 21872 21961 21988 22008 22053 22236 22203 22199 22163 22241 22000 22152 21649 21760 21559 21756 21591 21672 21371 21561 21334 21643 21461 21819 21338 21845 21648 22020 21276 22002 21565 21878 21422 21830 21370 21928 21585 22118 21760 22339 21730 22266 21766 22131 21619 22021 21673 22041 21504 21841 21216 21701 21203 21728 21360 22018 21381 21871 21344 21911 21520 21990 21645 22364 21900 22546 21980 22533 21933 22501 21944 22375 21941 22418 21831 22220 21741 22189 21602 21896 21216 21664 21277 21624 21237 21752 21223 21806 21529 21735 21412 21864 21643 22386 21424 21724 21592 22070 21729 22137 21889 22416 22107 22410 22319 22704 22400 22554 22373 22631 22432 22642 22322 22223 21857 21848 21461 21262 21037 21184 20846 21026 20705 20913 20665 20730 20529 20633 21344 21454 21564 21408 13684 18152 19553 19779 20130 20343 20532 20379 20528 20464 27425 23776 22900 22251 22311 10213 18727 20177 21089 21073 21293 21218 21399 21033 21505 27130 24384 23012 22888 22309 22519 19008 21005 21371 21977 21583 22107 21784 22256 21751 28608 23801 23090 22031 22072 21528 18732 20180 21177 20938 21495 21207 21771 21264 21820 21316 23552 21979 22252 21725 22076 19200 21376 21167 21739 21458 21873 21398 22069 21666 22192 22967 22741 21911 22459 21897 22316 21847 22322 21862 22218 21874 22310 21873 22163 21752 21984 21508 21923 21526 21880 21465 21922 21595 22160 21753 22200 21760 22196 21924 22336 22050 22549 22284 22628 22331 22646 22487 22644 22390 22291 22039 22425 22341 22573 22314 22615 22353 22541 22275 22496 22367 22337 21953 22165 21780 21525 20894 21384 21253 21626 21842 21675 21737 21637 21881 21792 21907 21888 21921 21879 21979 21826 21881 21772 22016 21884 22109 21958 22156 21895 22165 21768 21959 21557 21981 21591 21911 21455 21863 21481 21926 21453 21889 21539 21560 21437 21956 21544 21831 21390 21779 21350 21800 21302 21750 21293 21797 21191 21671 21236 21742 21255 21825 21293 
35701 42804 37251 41125 36185 42137 41559 33403 34888 34116 42439 36864 34888 41112 37362 35019 41568 42208 37154 37744 43167 43033 36663 41960 39856 37079 37280 39682 36976 38498 41933 33662 34203 42136 36664 37367 38219 41474 39924 39351 41260 41568 34587 37424 38002 36848 37898 38784 36432 40358 37911 41089 39002 40364 34048 40980 40979 34416 38617 38185 41864 43904 42135 37767 33692 37329 34096 38567 35413 34404 38362 35923 35917 36555 42573 43376 42805 40806 40716 34824 37813 41256 39347 34953 42984 36864 34672 39028 36928 41815 33896 38308 40807 38279 33000 37062 35299 38560 36800 33264 42230 38583 40048 38756 42216 35155 35703 36820 37398 37398 40021 35213 40521 35213 33358 42432 37024 36270 40021 39537 42496 41107 34640 36524 39139 39304 38131 42129 41716 35158 42208 37434 36288 39001 40599 36237 38290 41050 40184 37440 42723 38625 36933 37164 41062 38419 39685 43200 34731 40248 40448 33578 35659 41174 36882 36022 36112 38656 36437 40791 38122 41801 40224 37479 42497 43536 39185 34680 39020 43482 37889 40521 37819 39301 32843 35623 42855 40401 42386 41696 36167 37184 41122 37265 33201 30131 36004 33095 37236 39355 37895 37538 41264 34532 43781 36140 34792 40560 41009 40391 38688 42016 36712 37517 43713 38026 35840 32650 36792 35014 40253 41896 35810 37128 42226 35899 35104 41992 37277 33888 41696 34293 35389 40689 40589 39200 42784 34539 35840 33649 37924 42752 41511 36048 37665 40674 38867 37593 43142 35538 35096 41777 37728 33112 41206 34064 36128 39569 38762 37488 43783 37290 38217 41991 35816 34397 39936 36496 37026 40112 36210 35671 43080 38546 40214 40717 36128 42455 37495 36352 40133 41004 41102 33536 35844 36657 34928 39914 39308 40984 41588 36375 34885 32663 36984 34408 40256 36046 38322 39280 38569 38946 32912 32888 42979 39489 41265 33037 33129 36513 35088 38482 43008 34071 33948 34566 35792 39190 38714 33417 42892 33815 37321 40272 40206 38456 41937 37533 34253 37197 36263 40064 35601 33947 40097 36785 35685 41780 39410 41040 42616 34603 33024 37026 33024 39056 36118 37769 40928 34922 34845 43317 36780 36576 41047 36994 42256 37324 35520 41632 42256 34520 41634 43739 37392 39218 39868 37704 33343 37184 34122 41057 34192 36229 40377 40426 37872 42508 33495 33598 41353 38000 42496 42048 35959 26738 37703 38549 42440 42720 39797 42848 32135 39590 36726 40808 37785 40174 39024 37877 34660 41858 39632 42101 41848 34807 42974 35892 36172 41659 41543 38733 37660 41124 37028 38364 36100 40153 38836 35866 41559 43805 41989 34134 31833 37452 36143 39993 41833 40055 38441 36985 33169 34180 36165 37231 35046 38784 42624 40215 36776 41748 36544 34069 38277 38124 37128 42472 33985 37138 41057 39287 35370 42048 36024 36871 40807 34709 33702 41947 39313 40084 40481 41479 35477 39289 37303 37108 39811 42368 34285 41219 41476 38928 41690 32969 34761 42340 38196 34542 40328 35650 37899 40612 40145 37399 43153 37401 38915 42077 36115 42892 38788 36079 41128 41902 35265 40640 40002 37120 42057 41905 34564 41376 38152 35269 41616 35888 35667 39031 36776 34711 42442 37689 42218 32955 36121 35811 37603 35399 42080 34839 35684 40192 36102 33440 41936 39787 41856 42691 34472 41792 37570 34944 40229 36107 37964 40008 35356 36368 33399 35538 35448 35264 39445 36480 34720 40916 39234 41552 40055 38390 35351 38692 42993 38097 40803 41168 42448 36326 41363 37906 36480 42119 42455 33175 36039 33284 42631 39125 43104 41284 39398 36640 41972 37946 34504 34288 39042 38824 41789 42150 39152 39154 39607 33910 39025 44624 38403 41335 34862 37416 42561 37671 36300 40704 38549 39364 42894 34996 42972 39496 38662 43636 36831 36801 41424 36700 34443 38215 34358 40637 35683 39488 41225 34971 42211 42124 39142 43495 36685 37017 41356 36480 33365 37506 33448 41888 37124 37047 39984 36800 33476 41856 38400 42131 35267 35445 41575 38880 42000 37841 33195 41841 36060 39769 40515 36048 40960 38713 36881 43264 38250 42224 35968 37304 40650 35072 33765 37062 33262 37171 35584 39639 33751 35249 40662 34202 40825 37781 37868 35184 34411 36579 35536 40806 34928 39920 38699 33123 34225 39208 39776 34162 39993 35897 36594 35841 33946 41910 36161 38049 38695 38656 42132 42344 36840 39245 40169 41780 40544 33941 37127 35536 38741 38208 40378 38532 33330 40168 42232 33124 35671 37138 39212 38698 41252 39553 41285 38980 40970 37355 36950 43008 35703 33034 37161 32928 36145 42267 37590 35725 39753 36171 40520 35818 38592 39921 33333 40037 37247 34125 40807 35120 41300 37050 43212 37264 43312 38560 42813 36886 41204 36169 37975 42208 37721 40944 35608 40188 36002 41522 37068 41504 34706 41696 36658 42582 37125 40410 34177 41419 38932 33863 40272 34841 39858 33158 36675 41082 40677 33945 36776 42048 35751 40642 34576 41508 38166 34532 36855 33920 39622 34487 39297 34244 40776 36398 39937 36097 41049 38935 41984 43036 39305 34537 39128 37143 39698 37737 40544 35777 39472 36647 39271 36784 38409 37090 37996 35921 37857 35712 39177 37674 39388 38645 40928 38153 40308 38371 39912 37773 43637 41361 41139 41973 40036 42135 40307 40659 41511 40924 40137 41688 40838 41508 39712 42056 40192 42496 39622 41456 39351 41833 40697 42871 38992 41116 38872 41893 37532 41510 37294 39992 37031 38742 33864 38747 34976 38496 36253 40877 36096 39936 34192 39744 33005 38272 32777 38224 33544 37483 32960 38352 42299 37654 42937 41660 34902 40936 34748 39367 33568 37677 33459 35800 41564 36795 41224 36600 38231 35225 39881 35724 38683 35887 39392 33589 39813 34016 39776 34056 40258 34532 40151 34248 41915 37529 42348 35616 41443 36096 40258 34394 39701 35040 39458 42844 39585 41100 35654 38177 37904 34887 42418 35419 42585 34839 39040 38034 35466 40196 38608 41376 39086 36251 43121 42785 40712 34604 42344 34147 40292 42352 34172 35899 38312 35599 37264 35056 36036 40576 35755 35047 37024 36216 36768 35729 35738 41376 42816 35642 36124 42323 35403 40928 34856 42280 36455 33024 35680 33451 37019 41655 36062 41728 34568 40835 34056 40483 34148 40272 34607 39735 35907 41661 38549 41696 39232 42485 39462 35064 39744 35829 39063 34680 38497 35656 41526 36422 41712 36027 40800 33792 38305 34576 39147 32864 37190 33120 40434 35648 40125 33575 38342 33488 40152 34608 40779 33345 39522 33995 40871 36599 40922 36663 40055 36565 40340 36064 41089 36035 40900 35767 39849 39275 42592 39096 43136 38601 42599 40230 42850 40993 44000 43492 39170 36263 41061 36340 39976 36608 41235 38118 39411 36687 37581 35558 42554 34739 42625 38786 42118 37360 38199 39002 40244 38263 33376 39306 34626 37719 33005 40434 42737 34098 34477 37104 34563 36000 34880 36077 34904 35176 34037 35917 33761 34241 34874 37010 36208 39275 37762 39140 35778 40320 37968 39926 37728 38886 36618 40480 36833 40610 36440 41093 37371 40930 37010 40372 37474 40168 35988 40077 35616 39703 34213 41250 36025 40528 34775 39564 35328 39035 43095 38625 43065 38608 42989 37473 42047 37917 42201 37788 42995 38999 33141 38560 33993 39799 43131 38469 42533 39250 42309 37865 41632 38552 42528 38592 42288 37577 42424 37818 42552 37145 33234 36944 41870 37513 42118 36402 41288 35344 40281 35424 39386 34180 32769 35214 41514 33984 39400 34515 37584 32933 37923 42516 38936 42313 35672 39576 38450 40521 38464 42167 39808 41499 38153 41944 41385 33623 41824 41171 37270 40122 40365 33286 42561 38073 41392 42258 41872 36256 35238 39392 36089 37204 38673 37320 38852 38304 38983 37444 37616 37927 38935 39180 38887 39767 39485 40945 37881 35608 39780 39105 40237 37331 41421 38400 39249 38720 41592 38427 39368 34560 37530 34935 37922 34944 39745 37613 41776 37160 39296 37089 41168 37481 42640 38264 33769 38332 44130 38275 42931 38693 43392 38713 43511 37994 43316 39244 33544 37616 43552 37893 33645 38521 43479 38519 43411 38215 41661 37257 40077 37399 40154 36776 33415 37172 42623 37648 43443 38055 41361 35825 41100 38615 42210 37638 41070 37536 40739 35699 40140 35163 38448 40717 33816 40272 34608 40545 35776 40856 35963 40320 34870 39954 34288 42672 36390 40896 36044 40942 34058 40048 32845 38829 33626 40389 41915 40437 38557 39965 33651 36637 41124 41111 36976 36296 38212 40512 41668 40983 34400 40141 43085 33138 34441 36261 37031 37260 37105 39828 38096 39723 38695 38731 39152 38683 38985 36388 36258 34519 34744 35504 34010 34343 41824 34028 29719 36184 39949 34466 35490 39984 37472 42213 41097 42571 35355 44152 35476 35021 40128 43272 39382 42880 40192 34321 36619 40475 35176 39714 34503 39793 27447 34384 34875 35275 34754 39456 34448 40133 35892 41644 46560 38372 42489 42644 35209 39348 34599 38804 42913 40352 36469 41491 37409 40192 34016 39856 33378 29892 33364 36212 35940 42486 35848 41427 36197 41752 37680 36058 34403 42948 40660 42522 40636 42458 40025 44032 39936 43115 37687 41441 35341 38025 40192 33180 38608 40183 41584 39264 37458 41287 38528 34592 37868 47406 41685 36352 43540 36344 43033 41265 34200 41718 37676 37719 33173 35212 31956 36777 37102 40519 34184 39187 38707 38286 37441 37625 41414 40011 40615 40014 44552 36058 41168 38851 36140 34448 34908 42006 35392 34272 35842 36168 37280 33052 36242 32768 36245 36083 39415 35479 39992 35182 37968 33218 33944 41285 33860 40763 35658 41992 36679 42554 39564 36887 42564 38567 43144 36581 39590 35788 39845 42567 36412 40565 34164 40384 37222 34308 39624 33609 37131 41944 37496 33669 39661 35385 40736 35800 40947 37622 42734 35638 39681 34840 40384 33346 39024 42461 36933 42112 36402 41506 35128 42028 35481 40119 34628 39777 34464 40683 35656 42441 37706 42755 37404 33395 38224 36608 40717 38500 35600 33408 38480 36482 39125 34363 34374 39618 41928 34873 38460 34854 38567 35353 36306 42030 38216 40044 39220 37800 40653 38327 38498 35612 37756 35370 38192 36525 36231 39168 41961 43353 41640 33504 33108 32941 41677 43272 43366 35981 33869 35504 32970 34956 33528 35316 32488 35744 33000 36137 33379 36688 34928 37233 34937 38148 35642 39260 33595 38487 35654 37920 35781 39616 35171 40209 36309 41040 35699 41138 36231 40356 34744 40258 35908 38897 34425 38764 33490 38160 33518 36275 41804 36838 40889 35056 40198 36201 38947 34332 39936 35341 39577 34262 41632 36539 42853 39776 34816 41493 34608 41926 38375 43500 38476 44145 38752 42712 39560 39520 33527 36835 42727 35780 41909 34576 40271 34395 40519 34625 40535 36219 41600 36508 41238 36736 32721 34374 37813 38466 41572 35315 42527 36692 34198 38624 34861 38317 37744 40915 36885 39425 36608 41405 41393 34488 41344 41387 38038 40721 35687 35444 33078 35250 42386 40576 36757 39064 34549 35558 41197 41960 42712 41995 34805 33447 35375 36877 38093 38376 38656 39055 41170 40972 40916 40359 41175 38560 40019 34586 35411 33539 35753 33971 34604 41669 33815 41092 34765 42466 36837 41321 37002 34330 38333 40682 38637 33828 37073 42250 36831 41703 37814 33816 39620 35645 41920 35687 41343 35969 39865 34434 38452 34923 38730 32660 36445 39897 35346 39896 35510 41333 38640 41760 37545 41232 37780 32868 38251 34673 42197 37579 33589 38183 33539 37703 43776 38108 42586 38108 42721 36950 40844 35992 40560 34137 37056 39936 34685 40603 34464 40280 35937 40270 36570 33125 35568 41864 37146 34535 42244 42252 35757 33818 39050 35585 39957 37253 42577 40008 42838 42282 35637 42295 34030 42272 35122 42656 35093 41609 41266 37021 36707 42545 40733 38379 39584 36343 37805 34519 36597 34075 34768 32272 33457 41006 42802 33926 41626 32198 37983 32728 35063 38869 41527 32657 41472 32489 42248 44992 37347 37756 41371 42006 35914 34020 39389 38768 38539 40997 40239 42150 38321 32784 41781 43602 39242 37669 41703 44192 37248 37849 41859 38509 34048 39600 36068 41072 36120 47301 37957 39716 39009 39220 33125 33824 39399 39824 37232 43100 40410 36141 40232 36660 40938 34385 38290 41322 35843 39250 38839 41490 39978 35947 42384 37303 41867 39431 34778 40248 38742 36120 37530 43400 37587 41786 37120 41712 37203 40820 37223 41675 37265 40181 35924 38110 32785 37421 33063 36955 42624 37750 34119 39808 36016 40495 35688 40424 37685 41783 39034 33812 41193 34851 41928 35205 43572 35181 42512 41672 39095 42967 42312 34408 41584 34870 41968 33943 41067 43671 42880 42147 38088 40240 36012 33007 36440 41536 40486 34567 36517 34945 35568 34311 37136 35932 37368 36992 37499 37328 38400 36500 37227 35886 38258 37351 39784 38144 40156 37501 40249 35893 38100 33586 38295 34103 37447 42725 37376 42852 37921 42656 37360 33280 33369 42263 38131 33316 36512 41835 36192 41427 36369 40880 36022 40872 36396 39893 35066 40194 35968 40355 36567 40876 
23335 23590 23188 23831 23144 23369 23216 24040 23559 23351 23021 23457 23335 23666 22877 23516 23485 24101 23143 23436 23062 23802 23288 23339 23020 23799 23540 23848 22972 23473 23052 23755 23498 23414 22929 23725 23664 23674 22721 23526 23156 23747 23374 23410 22860 23529 23767 23868 22780 23167 23044 23684 23791 23130 22216 23261 24174 24504 23335 22713 23161 23223 23904 23900 22495 22743 23760 24629 23673 22791 22796 23092 23564 24175 23072 22401 22798 24071 24507 23692 22897 23129 23410 23433 23640 23117 23044 23219 23783 23575 23305 22900 23517 23253 23727 23381 23056 23056 23730 23631 23466 22992 22730 23217 23671 23480 23323 22946 23660 23555 23756 23025 23368 22881 23450 23445 23753 22932 23179 23094 24007 23431 23686 22838 23472 22857 23663 23287 23753 22885 23273 23147 23834 23517 23444 22823 23642 22976 23714 23272 23547 22824 23367 23229 23918 23479 23638 22887 23424 24058 24062 22925 23229 24496 24877 23911 23203 23232 23448 23534 24460 24112 23296 22664 23565 24429 24967 24269 23489 23169 23564 23601 24355 24172 23224 22711 23686 24576 24119 24042 23436 23536 24021 3370 14306 16158 16263 16631 17114 17687 17792 18013 17527 31757 27153 26191 25520 25394 24448 24901 24772 24906 24165 24069 24052 24272 24103 24447 23665 23996 23936 24512 23605 23873 23584 23977 23834 24215 23346 23851 23597 24448 23963 24059 23313 23875 23451 23997 23772 23935 23196 23695 23416 24192 23776 24233 23173 23743 23300 23855 23700 23949 23184 23601 23442 24243 23804 24021 23151 23621 23456 23693 23629 23917 23258 23495 23385 24071 23764 24096 23369 23609 23328 23652 23275 23917 23638 23793 23133 23643 23863 24390 23800 23095 22973 23570 23237 23994 24201 23855 22652 22741 23936 24678 24388 23869 22668 23239 23095 23448 24108 23868 22759 22599 23264 24384 24609 24281 22829 23155 23853 23307 23756 23703 23621 23116 23372 23494 23814 23818 23921 23489 23291 23207 23337 23301 23767 23392 23493 22938 23481 23441 23961 23756 23789 23168 23367 23133 23520 23194 23687 23488 23867 23173 23378 23101 23897 23596 24071 23336 23484 23545 23651 23217 23841 23417 23453 22901 23624 23383 24008 23529 23426 22967 23491 23179 23986 23309 23504 22958 23497 23356 23945 23650 23895 22892 23767 23016 23735 23418 23706 22925 23313 23101 23875 14777 17766 17751 18396 18445 18938 18800 19594 19216 19365 26685 25763 24992 25208 24475 24212 23721 23942 23627 24145 23917 23973 23181 23415 24237 24921 24373 23605 22800 23410 23185 23696 24206 24000 23030 22655 23025 24184 24576 24516 22714 23206 22843 23286 23980 23996 22887 22509 23393 24477 24455 23797 22550 23317 23408 23311 23786 23521 23272 23009 23588 23797 23850 23329 23160 23163 23410 23424 23808 22997 23351 23378 23854 23552 23453 23080 23445 23095 23678 23406 23433 22928 23631 23488 23963 23470 23296 22983 23937 23111 23654 23415 23736 22853 23308 23104 24007 23659 23698 22904 23488 23114 23488 23221 23935 23411 23462 22919 23602 23446 24119 23510 23744 22917 23540 23148 23849 23452 23757 22946 23348 23236 24084 23581 24040 23183 23431 23049 23362 23036 23723 23435 23619 22888 23461 23383 23876 23636 23979 23236 23444 23040 22829 23175 23684 23545 23773 23096 23401 23248 23795 23747 24078 23152 23069 22752 23302 23062 23508 23891 24246 22880 22663 22347 23437 24239 24756 24020 23203 22583 23196 23256 23202 23742 24204 23822 23200 22461 23048 23901 24576 24310 23829 23014 22793 23287 23511 23378 23278 23788 23371 10677 17329 18665 19201 19830 20133 20399 20389 20357 19913 27432 24939 24576 24064 24299 23885 23808 23249 23356 23278 24029 23719 24116 23692 23597 22981 23566 22847 23637 23337 23904 23435 23543 22939 23394 23111 23940 23512 24130 23542 23501 23040 23564 23144 23565 23263 23884 23403 23657 22903 23436 23057 24045 23562 23985 23164 23284 22922 23706 23132 23540 23352 23872 23249 23511 22804 23362 22955 23700 23430 24090 23468 23703 22935 23264 22992 23492 23047 23488 23260 23696 23412 23585 23051 23187 22933 23606 23414 23812 23648 23880 23354 23376 22647 23072 22863 23373 22843 23385 23446 23918 23713 23116 22201 22283 22130 22603 23123 23899 24209 24412 24108 23840 23049 22677 22657 22893 22247 22949 23525 23958 23910 23872 23360 23012 22551 22887 23032 22950 23335 23278 23699 23599 23797 23511 23476 23084 23109 22901 23028 23031 23440 23190 23338 23072 23380 23159 23637 23446 23509 23157 23280 22910 23109 22756 23203 22976 23479 23188 23695 23467 23795 23407 23548 23018 23221 22726 23248 22667 23413 22890 23575 23066 23380 22884 23381 22902 23384 22930 23484 22999 23612 23244 23782 23205 23689 23245 23615 23040 23380 22898 23254 18224 20213 20302 20964 20644 21334 20953 21592 21143 30651 25088 24820 24036 24306 23845 24116 23569 24007 23464 23580 23119 23310 22980 23224 22839 23208 22864 23219 22867 23201 22873 23240 22624 22997 22605 23030 22668 22901 22776 23151 22825 22938 22753 22988 22674 22823 22764 23040 23320 23449 22154 22715 22236 23098 23144 23021 23127 22939 22920 22899 22875 23041 22674 22861 23040 23236 23172 23064 23267 22727 23395 23019 23309 23232 23269 23081 23175 23220 22735 22784 23135 23100 23310 23023 23401 23249 23255 23103 23285 22940 23258 22874 23192 22785 23259 22912 23226 22896 23310 22896 23249 22855 23207 22767 23344 22876 23331 22818 23338 23040 23311 23036 23467 23060 23414 22887 23384 22970 23258 22748 23326 22828 23260 22868 23297 22969 23389 23122 23457 23062 23590 23151 23848 23368 23864 23184 23790 23248 23751 23388 23759 23421 23800 23356 23764 23520 23776 23214 23509 23113 23450 23099 23526 23271 23599 23335 23605 23286 23609 23304 23620 23445 23800 23687 23182 22848 23050 22753 22982 22925 23379 23473 23689 23338 23377 23187 23017 22738 23013 23037 23240 22790 23063 22935 23249 22951 22874 22807 22970 23035 22989 19296 21262 21704 21763 21936 21876 21868 21975 22085 22049 24627 23699 23687 23373 23539 23376 23627 23328 23649 23094 23401 23132 23344 22993 23493 23121 23621 23336 23580 23333 23731 23362 23766 23319 23772 23101 23445 22976 23417 22878 23337 22809 23184 22759 23223 22770 23306 22797 23163 22809 23257 22784 23222 22773 23365 22702 23176 22792 23399 22951 23204 22722 23151 22789 23236 22689 23297 22794 23281 22729 23319 22865 23344 22656 23184 22798 23106 22735 23109 22844 23150 22741 23117 22769 23140 22873 23317 22984 23253 23012 23246 22938 23192 22759 23173 22679 23095 22711 23035 22790 23004 22813 22981 22819 23154 22553 23288 22816 22999 22818 23314 23396 23575 23298 23981 23886 24008 23758 24001 23489 23510 23239 22957 22641 22648 22535 23102 22997 22821 22970 22809 23045 22876 23003 22909 22928 22935 23013 22936 22930 22869 23052 22878 23129 22876 23209 22912 23184 23031 23206 22889 23229 22990 23265 22784 23193 23072 23527 23063 23400 23136 23347 22863 23289 22792 23217 22745 23136 22729 23361 22738 23183 22678 23185 22767 23152 22724 23151 22731 23120 22682 23206 22692 23282 22876 23214 22667 23168 22706 23061 22659 23091 22765 23040 22617 23189 22745 23372 22773 23328 22894 23281 22910 23360 22924 23463 23040 23520 23213 23635 23200 23605 23293 23654 23287 23611 23290 23639 23312 23705 23270 23600 23310 23541 23200 23552 23148 23529 23188 23353 23176 23808 23562 23789 23406 23435 23300 23545 23347 23667 23412 23395 23120 23546 23447 23618 23404 23361 23172 23176 22915 22994 22807 22946 22801 22930 22866 22977 23169 23031 23280 22986 23170 23061 23316 23076 23144 23097 23150 23071 23118 23121 23223 23056 23296 23096 23296 22991 23279 23045 23270 23083 23341 23016 23337 23016 23343 23047 23369 22997 23377 23009 23336 22934 23332 22925 23364 22965 23400 22944 23396 23330 23543 22973 23287 23112 23318 22912 23491 22972 23361 23205 23264 22789 23286 23015 23584 23130 23328 22567 23106 22784 23347 22961 23319 22949 23335 22940 23397 22864 23360 23488 23635 22288 23335 22873 23369 22824 23339 22906 23343 22940 23321 22944 23286 22935 23358 23179 23623 23283 23609 23395 23708 23276 23622 23252 23639 23345 23757 23441 23493 23208 23562 23296 23593 23484 23854 23607 23827 23573 23931 23829 23432 22907 23251 23188 23254 22848 23243 23058 23129 22871 22983 22681 22826 22450 22501 22264 22385 22235 22666 22942 22896 23199 22983 23204 23012 23392 23157 23394 23335 23559 23454 23597 23493 23709 23503 23746 23429 23776 8713 14080 15245 16043 16118 16615 16444 16889 16691 16935 29184 26794 25429 25167 24593 24666 24135 24499 24012 24367 23680 24094 23534 23992 23456 23983 23461 14231 16504 17760 17756 18414 18326 19018 18692 19130 18850 28096 25952 25581 24603 24714 23979 24197 23604 24007 23593 23956 23576 24121 23840 24381 23710 24272 17474 19471 19404 20301 19978 20587 20204 20696 20265 31415 25912 25312 24193 24250 23844 24001 23581 23964 23538 24323 23416 23733 23367 23730 23521 23918 23639 20260 20972 21584 21356 21743 21388 21376 21005 20917 25846 23810 23214 23359 23495 24277 24329 24764 24719 24932 24540 24590 24392 24341 23821 23719 23341 19463 21086 21403 21635 21726 22220 22108 22392 21479 22241 24374 23802 23495 23525 23411 23609 23538 23816 23652 23688 23471 23591 23237 23460 23250 23342 23040 23323 23019 23403 23323 23838 23600 23941 23626 24029 23635 23975 23335 23654 23197 23347 22985 23393 22965 23501 23066 23574 23161 23587 23332 23771 23335 23915 23461 24051 23539 23965 23342 23799 23177 23594 23156 23490 23067 23528 23173 23668 23305 23808 23326 24006 23549 23948 23499 24123 23639 24139 23790 24142 23822 24057 23784 24125 23702 24180 23800 24152 23583 23877 23416 23687 23125 23532 23063 23418 22944 23275 22714 23138 22823 23136 22937 23222 22995 23236 22965 23264 23155 23399 23213 23419 23090 23435 23336 23511 23165 23854 23691 23762 23662 23874 23910 24119 24032 24080 24065 24150 24029 23580 23751 23585 23792 23496 23708 23528 23628 23604 23637 23597 23655 23503 23454 23260 23380 23079 23400 23106 23356 23056 23281 22932 23237 22935 23208 22921 23305 22887 23231 22938 23212 22936 23303 22917 23352 23060 23404 23218 23691 23345 23721 23296 23843 23266 23822 23461 23799 23447 23895 23573 23933 23542 23978 23480 23911 23529 24032 23539 23976 23505 23925 23421 23783 23325 23678 23237 23379 22866 23393 22752 23361 22848 23361 23028 23575 22916 23503 23292 23440 23089 23532 23083 23596 23303 23624 23312 23776 23328 23681 23413 23846 23394 23744 23377 23848 23233 23566 23240 23473 23111 23220 22661 22710 22413 22528 22209 22508 22208 22365 22272 22433 22295 22469 22407 22609 22647 23593 23655 23889 23731 24240 24107 24347 24132 24397 24323 24471 24339 24482 23902 23568 23605 23504 23577 23284 23387 23143 23089 22930 23055 22974 23155 23274 23258 23368 23727 23081 23305 23100 23416 23108 23411 23239 23424 23216 23554 23256 23658 23374 23680 23366 23753 23322 23680 23246 23559 23072 23419 22967 23252 22880 23271 22721 23214 22848 23442 23040 23633 23105 23697 23309 23762 23317 23769 23417 23847 23493 23954 23366 23840 23365 23664 23088 23498 23033 23480 22994 23346 22864 23301 22954 23424 22886 23491 23112 23716 23461 23433 22983 23464 22895 23389 22951 23383 22963 23392 23192 23655 23209 23656 23309 23704 23378 23703 23404 23704 23352 23633 23298 23516 23107 23366 22891 22919 22566 22674 22313 22563 22432 22603 22416 22923 22849 23025 22838 23115 23015 23176 23002 23766 23778 24179 24175 24449 24347 24400 24357 24576 24384 24547 24273 24510 24272 24368 23923 23618 23624 23349 23605 12311 14437 15192 15888 16087 16215 16353 16697 16719 34624 28295 26792 25665 25348 24727 13623 16228 17432 17599 18077 18168 18379 18069 18490 18197 27872 26229 25864 25219 25261 14368 18782 19142 19959 19757 20337 19960 20262 19588 20459 27268 26013 24823 25028 24373 24660 19997 21330 21088 21650 21364 21783 21339 21807 21312 27521 24616 24590 23913 24140 23605 21504 21587 22184 21904 22205 21855 22288 21911 22407 21915 24569 23777 24149 23613 24082 23504 23948 23578 23773 23554 23879 23505 23895 23735 24087 23766 24153 23816 24156 23784 24105 23744 24127 23654 23928 23762 24016 23695 23895 23527 23799 23667 23447 23161 23467 23219 23352 23145 24057 23992 23991 23552 23672 23368 23338 23357 23501 23575 23800 23484 23808 23799 24139 24081 24369 24492 24745 24469 24627 24001 23683 23918 23735 23940 23687 23817 23689 23800 23637 23708 23610 23790 23752 23756 23565 23639 23457 23508 23213 23417 23051 23387 23019 23317 22949 23307 22929 23270 22912 23277 22998 23351 23052 23559 23250 23763 23437 23737 23447 23920 23390 23799 23399 23928 23458 23915 23434 23827 23424 23822 23296 23733 23193 23619 
22031 22336 22448 21404 21716 22338 22899 21776 20863 22761 23751 23060 21696 21954 22467 22284 22848 21765 22140 22720 22887 21975 22260 22130 22613 22574 22244 21836 22420 22645 23175 22064 22161 22137 22501 22468 22404 21696 22826 22573 23043 21781 22250 22231 22587 22264 22604 21552 22464 22388 23215 21978 22212 21977 22452 22108 22856 21637 22343 22241 23216 22523 22369 21679 22449 22087 22866 21861 22144 21918 23116 22442 22738 21461 22610 21752 22868 22140 22561 21483 22800 22585 22999 21825 22309 21587 22684 22131 22770 21510 22382 22172 23124 22202 22267 21841 22312 22183 22775 21687 22151 22232 23053 22330 22213 21803 22500 21917 22759 21980 21997 21940 22872 22805 22731 21329 22010 21931 22608 22552 22460 21021 21275 22604 23913 23366 22190 21047 21624 20898 22594 22989 22256 20811 21851 23112 24052 22873 21607 21265 22044 21956 22839 22809 21988 20811 21340 22813 23559 22914 22285 22031 21857 22327 22248 22768 22236 22109 21722 22191 22413 22978 22557 22049 21774 21716 22062 22635 22353 22396 21646 22357 22217 22928 22497 22327 21651 22000 21906 22601 22215 22241 21443 22443 22341 23065 96 1629 1747 3226 2713 3649 3899 27832 26985 26062 24455 24504 23469 23905 22876 22569 22028 22839 22377 22528 21156 21806 21273 22020 21676 20903 20866 22437 22503 21515 20136 20593 20503 21507 21674 21056 19671 20133 21670 22559 21862 20635 19756 20551 20335 21143 21673 21584 20180 19728 20999 22537 22016 21170 20628 20788 20953 20871 21328 20972 20796 20377 20998 21163 21488 21289 20691 20515 20957 20776 21441 20847 20988 20383 20778 21040 21733 21347 21510 20501 20823 20497 21242 20999 21408 20473 20887 20696 21614 21111 21618 20728 20951 20444 21385 20689 21579 20816 20933 20273 21368 21128 21932 21020 21082 20494 20765 20484 21651 20987 21193 20373 21394 21271 21769 21175 21128 20388 21511 20529 21526 20930 21740 20677 21049 20331 21383 21135 21965 21029 21112 20711 21312 20812 21504 21147 21473 20484 20983 20595 21464 21245 21848 21285 21398 20207 21089 20121 21156 21511 21963 20777 20178 19876 22199 22705 22053 20643 20276 20346 21092 21073 21974 21593 20682 19733 21743 22615 22304 20748 20247 20549 21120 20873 21895 21959 21370 21182 20654 21585 21638 21923 21109 20939 20969 21255 21240 21683 21381 4418 5751 7633 8775 10325 10688 11221 10802 11851 28407 28774 27260 26834 25266 24696 23923 24420 23836 24105 22997 22712 22323 22817 22457 23016 21932 22213 21600 22669 22199 22946 21971 22083 21338 21991 21609 22455 21911 22151 21152 22137 21789 22705 21912 22017 21051 21813 21392 22391 21570 21814 20928 22090 22099 22410 21531 21745 21035 22038 21449 22440 21481 21761 21105 22320 21967 22573 21360 21824 21355 22161 21746 21888 21046 21609 21699 22498 21616 21669 21061 21856 21480 22249 21748 21829 20888 21943 22092 22929 22211 21272 20520 21445 21211 22272 22344 22390 20887 21093 21920 23106 23482 23104 21704 21219 21200 21640 21920 22761 22395 21349 20583 21097 21835 23547 22449 21365 20812 21318 21984 21809 22429 22044 21852 21372 21718 21771 22389 22471 22432 21811 21672 21793 22088 21903 22378 21974 21959 21340 21799 21744 22340 22340 22541 21656 21673 21511 22089 21733 22505 21897 22178 21257 21890 21710 22539 22167 22758 21852 21975 21297 22194 21405 22328 21845 22550 21489 21893 21301 22289 21984 22785 22022 22379 21188 21985 21216 22292 21760 22599 21701 21828 21136 21948 21634 22535 22257 22816 21735 22022 21517 8521 8760 11262 11939 13760 13558 14579 14118 15091 15237 29175 27428 26646 25091 24380 23565 23648 22952 23437 22966 23766 22881 23015 22181 22784 22588 23322 23096 23032 21910 21864 21498 22489 22034 22744 22889 23261 22256 21679 20859 22518 23151 23836 23521 23181 21791 21187 21305 21771 21651 22344 22748 22219 20830 20987 21052 22592 22946 23826 23023 22328 21929 21494 22252 21992 22023 22048 22345 22398 22338 21943 21847 21504 22248 22193 22488 22283 22731 22144 22080 21349 21826 21680 22455 21721 22304 22132 22486 21834 22028 21305 21780 21286 21986 21760 22566 22116 22696 21984 22161 21070 21785 21226 22023 21203 22059 21569 22411 21868 22246 21392 21865 21220 21860 21469 22584 22104 22846 22118 22400 21442 21916 21182 22018 21398 22256 21636 22192 21747 22592 22070 22553 21541 22091 21217 22008 21448 22365 21725 22516 22151 22777 22200 22804 22325 22677 21850 22051 21605 22060 21512 22309 21634 22122 21729 22226 22016 22488 22105 22476 21618 21539 20932 21232 21041 21873 21830 22407 22421 23103 23019 23511 23341 23538 23291 23312 23015 22812 22038 21957 21689 21461 21101 21040 20788 21091 20859 21241 21515 21569 21608 21558 13403 14576 16059 16657 17442 17699 18290 18341 18772 28155 27093 25621 24946 24007 23879 23179 23073 22571 22651 22066 22609 22144 22528 22122 22392 22167 22624 22096 22592 21825 22449 21955 22521 21947 22473 22260 22835 22289 22947 22315 22898 22208 22835 22100 22724 22225 22784 22391 22908 22433 22955 22433 23007 22248 23002 22261 23072 22219 22967 22321 22931 22096 22748 22100 22930 22407 22906 22183 22899 22259 23151 22155 22922 22320 22912 22345 22991 22407 22983 22441 22840 22343 22872 22247 22887 22467 22794 22286 22768 22378 22725 22192 22510 22057 22545 22201 22421 21885 22134 21753 22103 21875 22425 22178 22535 21925 21876 21531 21745 21072 21549 21351 21508 21224 21568 21347 21649 21225 22332 21955 22114 21984 22129 21575 21591 21489 21680 21883 21495 21845 21466 21814 21529 21689 21671 21592 21564 21696 21568 21723 21622 21841 21582 21741 21442 21989 21441 21740 21540 21888 21403 21929 21490 21976 21299 21996 21408 21910 21390 21876 21384 21947 21488 22083 21457 22133 21463 22153 21357 22055 21367 21846 21329 21926 21394 21995 21543 22157 21352 22167 21307 22151 21460 22089 21361 22230 21416 22027 21404 22030 21559 17580 17587 18923 18772 19832 19254 20281 19596 20413 19843 24676 23360 23413 22510 22841 22071 22528 21815 22442 21968 22264 21705 22231 21689 22170 21544 22072 21401 22050 21475 21837 21267 21490 21126 21111 20956 21436 20947 21495 21284 21612 21501 22016 21799 21781 21680 21611 21651 22549 22502 22574 21969 22272 21691 21795 21489 21805 21681 21635 21096 21927 22320 21776 22183 21853 22007 21857 22048 21960 22144 21889 22080 22005 22236 22190 22441 22071 22394 21954 22240 21771 22494 22055 22326 21785 22614 22168 22800 22318 22789 22231 22685 22208 22693 22172 22682 22234 22759 22209 22852 22209 22864 22268 23032 22256 23052 22279 22934 22307 22835 22164 22567 21994 22547 21563 22054 21336 22161 21301 22250 21613 22363 21958 22302 22006 22530 21995 22343 21792 22388 21745 22495 21611 22321 21525 22364 21670 22355 21668 22401 21880 22366 21940 22373 21826 22417 21958 22475 22007 22529 22055 22489 22016 22448 22052 22381 22179 22704 22225 22637 22273 22823 22226 22654 22185 22375 21933 22183 22336 22555 22102 22130 21985 22249 21912 21991 21705 21837 21479 21816 21511 21819 21477 21793 21120 21846 21745 21820 21639 21865 21739 21840 22071 21902 22231 21845 22221 21904 22757 22281 21984 21867 22105 21975 21931 21792 22244 21593 21841 21527 21915 21406 21895 21633 21989 21677 22002 21617 22006 21368 21958 21600 21986 21756 22227 21949 22448 21861 22694 22153 22639 21611 22512 21882 22628 21962 22732 22033 22570 21842 22642 22075 22753 21824 22514 21824 22512 22023 22637 22114 22941 22253 22884 22262 23012 22482 22873 22170 22709 22433 22848 22233 22937 22234 22904 22345 23045 22429 23073 22395 23128 22383 22881 22308 22875 22407 22999 22436 22952 22455 22995 22512 23064 22453 23127 22235 22879 22405 22963 22389 22818 22446 23127 22789 23285 23067 23479 23043 23667 23413 23754 23431 23788 23478 23656 23459 23823 23489 23765 23522 23729 23476 23754 23505 23592 23447 23761 23504 23639 23545 23637 23630 23339 22678 22546 22915 22345 22876 22494 22871 22552 22747 22638 22848 22545 22740 22544 22749 22558 22804 22565 22859 22440 22796 22371 22800 22391 22277 21667 22123 21623 21906 21492 22158 21536 22057 21602 21952 21472 22022 21709 22174 21543 22263 21527 22220 21489 22113 21559 22157 21396 22080 21777 22413 21745 22284 21662 22370 21900 22245 21715 22560 21705 22359 21670 22247 22029 22400 21868 22452 21799 22310 21820 22550 21874 22684 21901 22752 21996 22779 22081 22678 22061 22744 21986 22576 21990 22488 21983 22205 783 5273 7303 9564 9849 11050 11445 12372 12388 13536 33077 31360 29293 28586 27432 27056 26512 26619 25891 26013 25280 25192 24662 24840 23940 24084 23819 8065 10145 12064 13299 14348 14781 14841 14880 15588 32439 31088 29253 28024 26695 26147 25071 24937 24359 24493 24361 23853 24149 23856 24007 23520 23733 23387 12105 13824 15123 16187 16852 17204 17696 17819 18276 30604 29078 27156 26952 25701 25648 24897 25051 24291 24664 23936 24395 23861 24030 23362 23659 22877 15040 15384 17037 17131 18264 18253 19206 18859 20144 19530 28359 26244 25906 24693 24988 24129 24417 23553 23911 23040 23495 22738 23281 22340 22951 22128 22883 18115 19614 19557 20437 20352 21442 20998 21971 21290 22017 25164 25193 23979 24311 23367 23746 22860 22973 22323 22957 22348 22922 22358 23148 22891 22922 22427 22912 22423 23092 22632 23168 22633 22856 22048 22484 21882 21798 21300 21814 21671 22365 22680 23471 23472 23988 23712 23486 23159 23495 22759 22693 22186 22279 21571 21701 21527 22178 22008 22229 22180 22584 21925 22528 22625 22715 22758 22581 22993 22689 22862 22788 22940 22678 22877 22545 22814 22418 22625 22375 22647 22210 22624 22264 22528 22209 22496 21952 22167 21824 22237 21815 22312 21773 22167 21831 22469 21938 22647 22051 22838 22469 23079 22409 23227 22544 23282 22517 23203 22396 23060 22564 23121 22426 22944 22399 23095 22095 22773 22081 22726 22071 22528 21765 22631 21728 22516 21850 22479 21765 22198 21690 22529 21585 22410 21673 22491 21671 22228 21597 22362 21681 22567 21846 22629 21945 22461 21941 22841 22056 22421 21852 22419 22048 22404 21911 22460 21985 22543 21932 22432 22038 22517 22144 22692 22537 22912 22678 23207 22865 23172 22797 22961 22866 23068 22494 22800 22218 22507 22120 22465 21765 22066 21888 21653 21335 21560 21129 21120 20737 21020 20803 20976 21477 21798 21951 21781 22294 22055 22459 22093 22504 22531 22622 22732 22924 22630 22931 22647 22656 22296 22551 22152 22447 21967 22477 21835 22347 21802 22133 21655 22170 21552 22165 21767 22340 21919 22410 21810 22306 21649 22752 21824 22425 21778 22391 21702 22494 21742 22528 21820 22332 21845 22497 22024 22658 22151 22666 22133 22718 22112 22733 22105 22712 22227 22596 22029 22522 21602 22167 21626 21991 21543 22247 21489 22172 21511 22561 21884 22592 21739 22925 22312 23032 22466 23004 22576 23015 22372 22784 22215 22745 22131 22720 21935 22407 21653 22265 21545 22177 21552 22049 21715 22112 21707 22144 21760 22223 21760 22164 22024 21881 21608 22055 22378 22966 22749 23077 22752 23063 22730 22768 22425 22775 22177 22392 21682 21099 20813 20927 20795 20992 21232 21456 21120 21395 21831 21812 22093 22257 22683 22429 22718 22572 22813 22798 22778 22721 22880 22578 22830 22720 22841 22534 22795 22497 22419 21857 22261 21818 22113 21725 22080 21619 21957 21596 22144 21760 22249 21700 22321 21830 22404 21753 22415 21865 22476 21869 22534 21884 22587 22000 22785 21994 22824 22112 22608 22091 22695 22263 22784 22173 22763 22036 22724 21910 22615 21815 22602 21817 22377 21732 22318 21785 22173 21643 22054 21504 21996 3322 7255 8423 10661 10926 12487 12526 13610 13458 35471 33147 31228 28973 28258 26557 9624 11501 13751 14658 15896 15937 16930 16727 17367 35489 33456 30941 29719 28071 27745 14218 16135 17226 18830 19203 20052 20266 20751 20882 21291 32439 30561 28278 27269 26208 17345 17086 17870 18192 18776 18981 19511 19436 19755 19860 28553 26535 25953 25064 24727 24238 20270 20727 20967 21344 21133 21760 21475 21928 21760 26198 25461 25106 24513 24360 24019 24126 23639 23904 23503 23836 23168 23728 23129 23535 23014 23283 22985 23301 22807 23230 22737 23383 22656 23415 22845 23182 22841 23264 22795 23281 22639 23132 22436 23108 22563 23151 22419 23117 22467 23181 22603 23079 22449 23068 22487 22933 22443 23232 22432 23142 22460 23141 22376 23115 22551 22848 22346 22809 22494 23045 22551 22912 22325 22998 22227 23161 22295 23021 22409 23049 22392 23004 22263 23101 22543 22977 22385 22935 22233 22727 22311 22752 22159 22473 22078 22577 22032 22590 22040 22455 22022 22560 21950 22503 21830 21925 21342 21809 21143 21354 21439 21647 21248 21511 21108 21482 21207 21592 21114 21616 21695 22032 22610 21940 
