# Supplementary material for: An Active Feature Selection Strategy for DWT in Artificial Taste
Source: Hindawi journal article supplement (doi:10.1155/2018/9709505), 2018-01-01
Supplement: f1 [file 9709505.f1.zip › puerTea-low-2.txt]

43464 43468 43465 43474 51 8732 15674 19324 20039 21640 21484 21807 21526 22354 21658 22215 21589 22223 21644 21942 21456 21689 21571 21689 21463 21719 21607 21863 21703 22068 22083 22637 21746 21888 21787 22155 21929 22393 22297 22669 22516 22837 23308 23766 23666 24019 24028 24071 23906 24036 23943 24071 23857 23685 23322 22789 23204 22640 23129 22672 23015 22639 22983 22675 22790 22694 23029 22726 22833 22428 22850 22272 22890 22202 22743 22159 22663 22048 22528 22055 22536 22183 22743 22056 22727 22198 23021 22334 23318 22621 23209 22528 23287 22423 23173 22445 23171 22294 23189 22411 23138 22229 23168 22087 23017 22119 23033 22593 22658 22308 22961 22087 22764 21927 22886 21964 22760 22181 23390 22521 23507 22641 23631 22729 23500 22480 23264 22420 22965 22280 22856 21905 22727 21896 22739 22029 23130 22437 23508 22528 23349 22429 23095 22180 22956 22216 22861 22318 22748 22439 22788 22214 22615 22002 22580 22184 23045 22720 23456 22839 23433 22714 23261 22509 22556 22188 22383 21853 21987 21679 22343 22278 23134 23109 23440 22945 22961 22455 22989 22497 22508 22521 22293 22023 9896 15509 17628 18736 20189 20880 20673 20823 21789 21608 31428 26487 24967 23860 23144 23178 22552 22888 22439 22920 22461 23033 22869 22916 22596 23110 22870 23089 22922 23191 22679 23049 22541 22993 22313 22892 22510 23051 22423 22994 22435 22968 22312 22839 22103 22680 21862 22647 21964 22935 22384 23340 22800 23599 22828 23604 22887 23431 22486 23150 22247 23054 22015 22924 21988 22810 22020 22893 22052 22754 22087 22934 22352 23319 22520 23336 22350 23158 22380 23173 22197 23061 22513 23034 22032 22671 21916 22683 22173 23029 22201 23220 22592 23563 22680 23631 22613 23531 22674 23399 22294 22855 22032 22680 21996 22807 22211 23060 22531 23232 22585 23229 22678 23126 22581 23044 22393 22926 22357 22935 21975 22873 22027 22464 21855 21912 21554 22512 22927 23828 23837 24246 23477 22965 21580 21615 21456 22326 22902 23143 23136 23392 22603 22592 22212 22466 21997 21783 21565 22125 22392 23474 22895 23829 23991 23657 23368 22453 22542 22093 22555 22560 23036 22775 22944 22584 22672 22138 22684 22227 22668 22393 23249 22871 23408 22798 23240 22441 22764 21965 22468 21955 22817 22366 23150 22523 23351 22391 23063 22114 22868 22442 16956 18519 20358 20199 21572 21022 22098 21487 22357 31334 26124 23451 23704 22509 23188 22413 23394 22802 23420 22630 23181 22299 23031 22152 22839 21880 22856 21895 22964 22361 23527 22897 23574 22825 23159 22088 22808 22047 23151 22432 23379 22453 23226 22190 23030 22304 22816 22077 22693 22107 22910 22633 23342 22932 23415 22760 23284 22384 22729 22052 22647 22324 23185 22753 23095 22456 22921 22336 22995 22214 22120 21405 22573 22936 23851 23849 23928 23290 22885 21867 21688 21313 21771 22209 22848 22613 23289 23169 23100 22443 22354 22344 22000 21713 21722 21991 22589 23136 23664 23970 23433 23389 22702 22993 22371 22738 22153 22471 22184 22752 22548 22894 22664 23017 22519 22832 22304 22667 22359 22918 22166 22597 22229 23034 22918 23458 22688 23180 22216 22792 22036 22585 22077 22980 22494 23241 22510 23252 22305 22861 22126 22946 21814 22647 21825 23208 22544 23559 22724 23468 22365 22939 22019 22534 21853 22848 22176 23237 22571 23221 22158 23014 22129 22809 21927 22795 22198 23212 22804 23447 22588 23188 22093 22810 21886 22864 22311 23259 22455 23086 22086 22852 22170 22897 22119 22637 22070 22814 22598 23447 22901 17144 20280 21442 20878 21585 21138 21757 21355 22197 21961 26481 24055 23708 22577 22728 22416 22245 21760 21978 21657 22391 22903 23890 23849 24047 23492 23364 22374 21959 21425 21602 21776 22549 22972 23350 23259 23190 22583 22206 22996 22372 22668 22105 22664 22384 23153 23016 23256 22955 23221 22721 23010 22606 22732 22145 22501 22039 22685 22289 23227 22708 23184 22572 23148 22568 23047 22193 22738 22155 23288 22188 22864 21904 22631 22163 23333 22552 23460 22688 23630 22560 23493 22222 22849 21883 22739 22154 22942 22391 22937 22366 23215 22329 23271 22320 22992 22063 23024 22055 22724 21860 22403 21872 22697 22048 23257 22514 23375 22669 23478 22561 23202 22115 22565 22036 22596 21937 22610 22103 22929 22496 23140 22668 23282 22550 23100 22547 23006 22384 22830 22289 22736 22221 23172 22199 22429 21704 21896 21367 21893 21935 22580 22666 22464 22622 23348 23367 23872 23905 24058 23585 23736 23082 22635 22306 22144 21558 21444 21437 21828 21460 21968 22712 22503 22936 22603 23176 22739 23065 22554 22732 22461 22779 22423 22713 22812 22737 22344 22749 22204 22548 21952 22528 22289 23014 22417 23174 22757 23540 22818 23488 22624 21080 21324 22193 21337 22119 21440 22129 21395 22313 26019 23969 22648 23382 22528 23460 22540 23374 22482 23290 22543 23248 22360 23099 22167 22870 22464 22846 22224 22757 21933 22696 21836 22711 22148 22681 22024 23188 22456 23448 22688 23544 22612 23395 22438 23146 22118 22809 22091 22581 21831 22537 22071 22776 22308 23127 22613 23187 22603 23018 22556 22900 22261 22804 22100 22692 21945 22482 21760 22400 21730 22724 22868 23729 23517 24048 23741 24112 23690 23587 23054 22536 22081 22016 21641 21641 21324 21707 21792 22176 22264 23077 23205 23372 22855 22597 22096 22380 21956 21713 22056 22517 22649 22548 23365 22984 23383 22827 22908 22340 22513 22051 22455 22490 23000 22638 23089 22375 22994 22427 22812 22605 22698 22037 22622 22300 23286 22790 23552 22570 23430 22481 23040 21883 22684 22024 23127 22467 23219 22320 22976 22107 22369 21754 22956 21890 22589 22065 23136 22695 23461 22593 23319 22103 22768 21911 22790 21857 23085 22322 23273 22351 23305 22253 22871 22298 22790 21898 22784 22092 23307 22607 23580 22635 23283 21837 22643 21899 23007 22606 23168 22429 22921 22323 22857 22168 22626 21975 22775 22454 23316 22857 21340 22004 22587 21898 22240 21674 22381 22410 23124 22497 23672 22357 22592 21910 21773 21550 22037 23065 23061 23477 24112 23638 23176 21947 21609 21421 22176 22734 23352 23072 22903 22531 22312 22144 22297 21982 22091 22680 22565 23120 22836 23292 22923 22949 22518 22477 22205 22423 22040 22458 22316 22834 22464 23223 22506 23011 22219 22684 22276 22948 22308 22666 21876 23029 22593 23409 22795 23482 22740 23416 22377 22903 22063 22735 21831 22900 21879 22867 22205 23276 22426 23246 22248 22912 22217 22903 22492 22945 21988 22752 21744 22924 22180 23288 22580 23498 22839 23527 22560 23192 22182 23069 22089 22804 21752 22811 22081 23169 22416 23211 22455 23049 22185 22725 22166 22753 22632 22689 22193 22748 21975 22584 21830 22552 22074 22814 22336 23296 22696 23448 22988 23892 23460 23477 22642 22156 21301 21490 21225 21878 22240 22852 22955 23346 22990 22839 22343 22600 22156 22320 22276 22219 21984 21933 21707 21708 21440 21898 22136 21975 22310 22735 23198 22821 23366 22967 23229 22797 22861 22318 22611 22110 22535 22262 22818 22613 23072 22670 23099 22479 22873 22331 22646 22294 22390 22136 22720 21873 22588 21875 22875 22193 22956 22337 23139 22424 23377 22620 23648 22706 23516 22652 23342 22321 23063 22322 23101 22071 22804 21888 22612 21996 22888 22333 23172 22426 23258 22454 23168 22204 22921 22172 23100 22212 22951 22032 22868 22134 22706 22076 22703 21785 22808 22020 23063 21912 23040 22439 23301 22501 23341 22705 23444 22762 23432 22717 23232 22739 23170 22565 22952 22404 22830 22073 22639 21929 22537 22032 22699 21942 22517 22023 22842 22464 22940 22632 23013 22861 23395 23025 23424 23068 23256 23079 23130 22528 22729 22325 22400 22450 22930 22348 22633 22217 22375 22070 22290 22356 22002 22117 22075 21943 21978 21689 21701 21587 22010 22441 22090 22692 22264 22638 22285 22805 22649 22876 22791 23111 23008 23213 22933 23271 22889 23216 22820 23377 22751 23364 22575 23239 22544 22892 22484 22912 22093 22773 21921 22521 21898 22679 22081 22682 22056 22914 22100 22839 22187 22848 22104 23168 22412 23228 22322 23342 22448 23259 22407 23336 22503 23224 22489 23217 22416 23230 22492 23267 22496 23310 22403 23296 22342 23341 22369 23352 22272 23300 22345 23175 22229 22993 22213 23054 22113 22876 22080 23008 22257 23032 22151 22999 22087 22939 22045 22940 22165 22846 22112 22801 22670 23272 22682 22994 22036 22675 22222 22648 22231 22744 22065 22679 22118 22631 21881 22556 21857 22545 21689 22323 21672 22105 13015 16576 18035 19216 19456 20458 20548 20948 21093 41026 28834 25244 23997 23908 23211 22811 22359 22486 22329 22519 21898 22190 21908 21889 21697 21874 21603 16298 18399 20113 20142 20602 20573 20801 20952 21014 32256 25468 24128 23124 23321 22757 22941 22640 23181 22731 23200 22736 23130 22715 23112 22810 23081 10775 20071 21025 21792 21536 22224 21655 22280 21707 22200 27286 24261 22992 23058 22379 22805 22208 22714 22129 22775 22199 23289 22709 23552 22837 23608 22803 17513 20903 22551 21988 22904 22069 22784 21796 22567 21538 25596 22651 23285 22056 23096 22088 22944 22222 22943 22432 23072 22163 22969 22314 23101 22437 23264 20241 22575 22050 23092 22216 23141 22017 23074 21731 22557 22902 23016 22057 22993 22160 23008 22404 23045 22276 23334 22551 23535 22784 23643 22720 23565 22528 23368 22249 23080 21952 22688 21858 22697 22062 22727 22082 22732 22257 22830 22336 22973 22387 23110 22605 23201 22572 23136 22264 22889 21897 22678 22259 22916 22660 23229 22881 23389 22779 23337 22376 22843 21677 22420 22170 22759 22342 22839 22456 23076 22966 23297 22906 22984 22326 22400 22016 22030 21399 21466 21272 21689 21661 22542 22920 23213 23329 24091 23577 23650 22720 22104 21701 21656 21569 21943 21921 22368 22452 22265 22565 23178 23103 23220 22768 22429 21917 21828 21399 21350 22209 22161 22972 22813 23220 22980 23264 22722 22900 22284 22473 22148 22552 22281 22407 22277 22754 22502 22982 22600 22929 22238 22554 22077 22411 22144 22805 22647 23326 22848 23424 22098 22375 22176 22617 22130 22829 22558 23152 22420 22919 22089 22540 22101 23063 22725 23393 22616 22880 22002 22784 22277 22787 22163 23044 22473 23271 22445 22984 22151 22688 21876 22877 22352 23408 22661 23369 22474 23034 21761 22548 21914 22960 21948 23008 22228 23360 22144 22816 21872 22692 22217 23219 22615 23521 22673 23147 22320 22649 21983 23062 22055 23082 22363 23356 22255 23001 21953 22568 21822 23081 22223 23552 22635 23245 22333 22768 21768 22840 21816 22853 22218 23068 22450 22932 21926 22642 21795 22725 22351 23234 22553 23651 22528 23257 21858 22663 22050 23026 21997 23058 22485 23155 22144 22711 21783 22754 22232 23111 22579 23445 22760 23296 22631 22848 22039 22516 21976 22760 22243 22952 22465 23109 22523 22791 21926 22461 22119 22924 22720 23361 22753 22899 22087 22438 22022 22140 22234 22862 22480 23189 22412 22771 21865 22523 22177 23114 22876 23387 22471 22583 21912 22870 22321 23021 22736 23123 22215 21909 21835 23033 23553 23989 23145 22865 21764 21787 21608 22482 22088 22658 23115 22507 21541 21537 21475 22536 23179 23872 23600 23142 22177 21917 21470 22130 22482 22359 22689 23324 22407 21818 21296 21485 21671 22454 23168 23895 23741 23491 22509 21890 21576 22231 22132 22296 22990 23344 22710 22089 21305 21622 22101 23364 23832 23910 23028 22232 21594 22152 22605 22336 22794 22593 23072 22288 22393 22141 22791 22712 23424 22488 22479 22156 22580 22262 22903 22594 23012 22243 22472 22131 22827 22824 23206 22791 22775 21945 22425 22227 22711 22321 22895 22752 22861 22103 22459 22118 23063 6884 17754 19143 19993 19430 20507 20544 20800 20453 21332 30742 25508 23632 23641 23253 23735 17720 20437 20251 21273 21000 21877 21539 22304 21351 32825 25093 24689 23607 24101 22950 17729 19943 21646 21736 22151 21656 22626 21801 22100 21385 25837 23792 24134 23072 23268 16288 21229 21331 22488 21876 22640 21488 22279 21622 23008 25632 24320 22576 22983 22076 23051 21069 22596 22167 22738 21836 22401 21751 23008 22407 25917 23068 22952 21948 22871 22184 23045 22387 23318 22295 22773 21932 23148 22443 23556 22714 23457 22054 22764 21913 23016 22034 23078 22240 23375 22267 22892 22008 22756 22294 23477 22682 23361 22204 22443 22247 22231 22164 23300 22337 23010 21693 22912 22390 23370 22799 23449 22103 22693 21838 22856 22013 23179 22440 23089 21816 22896 22586 23399 22518 22753 21867 22896 22209 23023 22552 23044 22199 22554 22080 23128 22810 23200 22237 22516 22156 22826 22305 23071 22635 22804 21965 22587 22536 23360 22813 23175 22265 22666 21813 22744 22384 23092 22553 22816 21736 22648 22507 23384 23380 23414 21525 22108 22006 22485 22766 23363 22292 21943 21216 22276 22901 23744 23340 
21297 22520 21985 22407 22137 22655 21339 22585 21259 22229 21703 22048 22151 21905 21491 22528 21509 22758 21387 22277 21495 22438 21859 22201 21817 22094 22067 22336 21569 22343 21349 22753 21199 22240 21618 22085 22029 21395 21465 20974 21564 20992 21671 21105 21882 21223 22040 21329 22088 21351 21996 21588 22331 21614 22232 21921 22377 21694 22354 21697 22473 21552 22472 21771 22345 21845 22333 21793 22303 21824 22168 21913 22112 21773 22125 21696 22056 21699 22080 21613 21962 21933 22005 21898 22042 21721 22091 21648 21901 21347 21745 21046 21722 21271 21767 21271 21504 21453 21708 21177 21749 21841 22204 22254 22639 22568 23111 23083 23148 23170 23315 23065 22848 22228 22004 22139 21895 21264 21039 20784 21112 20984 21671 21961 22336 22449 22666 22409 22036 22333 21847 22197 21801 21999 21850 21988 21745 21792 21426 21829 21580 22086 21982 22312 22202 22505 22229 22798 22296 22642 22243 22549 22223 22455 21850 22064 21478 21998 21539 22166 21879 22500 21872 22449 21812 22350 21804 22146 21564 22256 21483 22087 21270 21975 21335 22232 21811 22596 21760 22485 22031 22749 22204 22763 3630 9084 10220 11927 11959 13419 17241 18413 14672 15728 31740 29947 26631 25957 24308 24129 23144 23355 22485 23008 22384 22874 21821 22615 21782 22638 21783 22442 21535 22257 21825 22557 22126 22789 22351 22605 21672 22225 22024 22471 22078 22505 22048 22563 22018 22468 21943 22209 21728 22064 21366 21803 21264 21501 21367 21788 21664 22415 22275 22640 22307 22456 22209 22117 21760 21841 21431 21685 21421 21777 21077 21455 21373 21121 20919 21361 21239 21757 21783 22318 22664 23077 23150 23293 22928 22546 22325 21616 21933 21680 21961 21441 21773 21433 21824 21749 22107 21979 22149 22011 22186 21706 21975 21768 22040 21328 22106 21673 21838 21277 21750 21319 21832 21545 22134 21734 22433 21975 22567 22149 22566 22187 22522 22057 22555 21723 22210 21321 21862 21303 22189 21712 22486 21732 22289 21596 22172 21430 21778 21318 21772 21408 22285 21885 22613 22077 22570 21766 22196 21233 21820 21229 21883 21456 22160 21771 22311 21969 22269 21443 21504 21319 21924 21134 22057 21873 22625 21989 22705 21869 22016 21465 21701 21590 22176 21835 22441 21905 22150 21693 21981 21647 21863 21522 21893 21216 21809 21674 22400 21978 22620 13751 15895 18309 17778 16368 16183 16342 17200 16843 18404 34886 29306 26262 24489 23386 22980 22411 22459 21456 21576 21779 22657 23072 23719 23444 23398 22790 22821 22140 21910 21131 21160 21417 22094 22509 22224 22495 21976 22292 22206 22049 21777 22028 22295 22295 22304 22780 22508 22724 22203 22360 21694 21948 21733 22461 22088 22585 22299 22460 21952 22323 22256 22176 21546 22009 21768 22606 22220 22872 22304 22892 22195 22520 21610 22137 21595 22457 22017 22771 21847 22605 21775 22444 22026 22197 21568 22225 21440 22192 21821 22763 22187 23056 22135 22885 21839 22335 21539 22229 21619 22491 22002 22473 22100 22608 21772 22631 21651 22394 21553 22450 21612 22260 21486 22318 21767 22676 22336 22829 22276 22871 22162 22309 21722 22013 21586 22451 21995 22684 21943 22400 21939 22308 21835 22202 21444 21773 21084 21809 21888 23154 23027 23300 22601 22720 21621 21291 20861 21121 21546 22528 22520 22775 22021 21899 21632 22364 21490 21479 21075 21530 21619 22569 23043 23558 22904 22020 22040 21579 22133 22038 22568 22208 22372 22011 22165 21992 22019 21833 21909 22017 22497 22436 22855 22336 22856 22350 22532 21690 21953 21641 22261 10848 15447 16743 18065 17828 18861 18556 19256 18765 19213 28147 25920 24149 24042 23040 23557 22579 23048 22215 22823 21710 22312 21704 22506 22001 22727 22045 22729 21755 22503 21687 22708 21564 22176 21488 22124 21689 22826 22272 22921 22320 22753 21874 22475 21351 22190 21382 22381 21825 22657 21977 22681 21973 22444 21783 22375 21760 22754 21709 22057 21538 21927 21621 22472 21595 22503 22160 22759 22379 22810 22575 22899 22346 22457 21495 21415 20978 21219 21317 22080 22215 22811 22425 22557 21781 21928 21298 21807 21286 21739 21232 21239 21022 21580 21655 22534 22912 23467 23107 23271 22773 22336 22441 21907 22161 21575 21895 21777 22260 22184 22312 22275 22307 21948 22252 21864 22293 21869 22805 21668 22185 21696 21978 21547 22025 21563 22101 21868 22673 22142 22689 22135 22859 22211 22816 22295 22919 21869 22491 21661 22289 21393 22119 21427 22088 21492 22181 21600 22252 21756 22729 22024 22623 21840 22576 21761 22359 21681 21711 21489 22729 21648 22325 21536 22228 21445 22119 21297 22353 21625 22568 21927 22584 22182 22912 22250 22903 22249 22804 22056 22555 22032 22380 21591 22074 21427 21955 21608 22213 21733 22441 12283 17329 18581 19904 19719 20227 20165 20420 20055 20755 27697 25034 23033 22576 21721 21870 21405 21395 21224 21417 21015 21638 21654 22207 22528 23241 23109 23393 23280 23264 22906 22771 22336 22119 21997 21879 22169 21683 21910 21637 21888 21943 22262 22277 22466 22297 22310 22069 22263 21937 22224 21842 22253 21687 22234 20705 21079 20672 21376 21096 21430 21335 22053 21703 22123 21632 22020 21281 21801 21097 21572 20846 21318 20910 21504 21029 21863 21286 21848 21345 21905 21307 21808 21268 21677 21120 21520 21042 21483 21123 21445 20768 21303 20898 21725 21540 22101 21685 21990 21303 21659 20987 21536 20826 21496 21041 21824 21392 21956 21132 21787 21185 21095 21047 21332 20898 21339 21362 21641 21548 22033 21671 22056 21515 21631 20953 21318 20957 21680 21330 21939 21415 21828 21293 21536 21362 21081 20546 20601 21146 22022 22407 22857 22724 22980 22277 21719 21070 20620 20516 21167 21639 22194 22081 21997 21451 21325 21193 21090 20645 20913 20766 20925 21543 22291 22292 22024 22277 21728 21922 21188 21735 21608 21965 21915 22053 21643 21873 21720 21689 21251 21830 21784 22353 21957 22448 22005 22007 21392 21616 21200 21891 20431 21115 20964 21473 20817 21367 20953 21282 20669 23552 22407 22989 22137 22620 21783 22358 21386 21877 21157 21906 21608 22327 21824 22118 21511 22025 21367 21921 21149 22181 21602 22391 21882 22529 22126 22446 21736 21978 21324 21863 21227 22144 21825 22331 21783 22195 21426 22221 21646 21952 21477 22023 21372 21858 21447 22253 22022 22403 22095 22528 22099 22304 21651 21913 21300 21696 21523 22181 21915 22318 22161 22480 22007 22045 21479 21126 21451 21615 21407 21287 20951 21106 21411 22348 22703 23018 23032 23281 22805 22746 22224 21637 21038 20935 20853 21334 21579 21903 22305 21967 22349 21951 22107 21824 22000 21831 22122 21588 21680 21318 21813 21792 22285 22072 22452 22140 22671 22073 22552 22251 22413 21997 22310 21589 21936 21392 21914 21415 21888 21582 22036 21664 22408 21936 22332 21721 22250 21547 22200 21349 22184 21258 21819 21288 21994 21874 22435 21834 22570 22201 22677 22084 22725 21975 22563 21847 22259 21609 21911 21601 21975 21415 21975 21432 22332 21681 22471 21809 22514 21856 22349 21625 22145 21793 22001 21425 21917 21341 21732 21466 22191 21929 22478 22188 22660 22419 22586 21985 22363 21675 22016 21409 21865 21443 21834 21208 21348 21185 21417 21384 21977 22122 22491 22339 22557 22465 22744 22309 22032 21661 21608 21657 21665 21319 21315 21147 21175 20955 21591 21517 21984 21593 21708 22019 22749 22882 22635 22665 22155 22588 21880 22367 21632 21929 21712 21856 21596 21736 21533 21667 21453 21896 21603 22080 21690 22327 21799 22280 21860 22313 21993 22467 21757 22250 21537 22172 21569 22119 21671 22098 21028 22167 21474 21974 21342 21980 21357 21843 21126 21792 21331 22045 21197 22057 21562 22442 21751 22439 21967 22528 21755 22361 21917 22544 22045 22595 22077 22674 22100 22816 21991 22679 22059 22679 21868 22373 21839 22272 21550 22226 21400 22292 21333 21993 21383 21734 21255 21952 21504 21892 21395 21975 21601 22252 21775 22366 21871 22319 21929 22320 21911 22281 21941 22313 21808 22190 21760 22076 21667 22044 21631 21935 21810 21893 22114 22148 21602 21724 21376 21411 20924 21121 20922 21047 20988 20967 20944 21199 20821 21081 20811 21248 20983 21239 20921 21129 20868 21004 20898 21020 20883 21007 20750 21013 20972 21157 21230 21380 21696 21760 22304 21949 22390 22002 22394 21815 22101 21953 22180 22044 22300 21993 22420 22220 22415 21952 22528 22227 22528 22198 22588 22180 22582 22167 22451 22178 22636 22024 22614 21875 22598 22112 22433 21879 22337 22069 22317 21811 22300 21639 11285 14196 14209 14473 15603 15337 15795 15285 16112 31960 26608 26597 25321 23632 23808 22656 23225 22474 22847 22074 22686 21939 22593 22032 22917 22231 6925 12550 17825 14553 16714 16922 17947 17757 18584 18273 35384 29124 26859 24737 24438 23106 23484 22429 22884 21862 22615 21675 22461 21752 22356 21681 22308 7415 14102 16214 18016 18179 19114 18947 19744 19285 19902 30529 26173 24327 23945 22831 22963 22227 22688 22132 22588 22263 22823 22171 22696 21143 21485 21069 18950 19469 19810 19566 19638 19345 19642 19894 20241 20321 23383 22887 22972 22614 22833 22662 22921 22855 22976 22662 22779 22529 22072 21296 21384 20893 21015 19756 20029 20050 20146 20133 20330 20462 20547 20772 22627 21579 21616 21794 21817 21944 21575 22003 21438 22008 21591 21958 21282 21632 21260 21327 21127 21254 21003 21400 21181 21640 21530 21895 21605 22175 21752 22282 21813 22243 21825 21943 21466 21714 21314 21752 21298 21608 21414 21863 21145 21944 21728 22190 21789 22295 21666 22106 21371 21618 21192 21793 21216 22091 21981 22471 21925 22459 21809 22150 21561 21931 21157 21836 21248 22021 21339 22313 21437 22091 21476 22101 21688 22226 21842 22482 21942 22400 21641 21964 21365 21962 21575 22298 21740 22464 21927 22739 22069 22737 21948 22362 21417 21927 21360 22082 21636 22103 21893 22120 21521 22217 21941 22404 21869 22296 21698 22010 21159 22042 21424 22336 21895 22616 22097 22823 21975 22407 21632 21795 21341 21909 21498 22117 21546 22125 21847 22227 21925 22287 21655 21784 21679 22341 22149 22607 22030 22192 21528 21753 21542 22124 21601 22067 21734 22381 21793 21996 21302 22039 21929 22597 22336 22598 21796 21969 21136 21451 21203 21858 21635 21934 21990 22582 22272 22071 21297 20999 20739 21426 22024 22967 23110 23272 22749 22184 21271 20992 21346 21537 21716 22166 22489 22519 21526 21280 20745 20951 21195 22305 23078 22950 22324 21577 20944 21008 21204 21807 21417 21839 22134 22549 22382 21528 20766 20909 21238 22189 22807 23129 23123 22572 21760 21521 21657 21669 22034 21616 22046 21779 22299 22011 22060 21659 21625 21473 21988 21941 22439 22237 22257 21858 21504 21610 21719 21625 21939 21808 22153 21966 22203 21653 21873 21526 21703 21575 22200 21946 22372 22261 22280 21591 21744 21387 22101 21799 22063 21703 22107 21793 22257 21463 21696 21388 22147 21968 22598 22153 22483 21598 22007 21280 21885 21056 22031 21554 22293 21932 22115 21408 21863 21489 22648 22123 22420 21513 21767 21401 22156 21548 22272 21789 22328 21432 21815 21261 22000 21675 22658 21997 22532 21611 21960 21356 21607 21517 22212 21783 22424 21623 22015 21250 21974 21705 22455 22066 22631 21916 22233 21274 22103 20985 22106 21561 22279 21716 22464 21681 22119 21283 21909 21565 22589 22007 22659 22001 22094 21153 21966 21505 22137 21611 22336 21919 22081 21351 21799 21452 22537 22018 22688 21984 21964 21261 21764 21394 22148 21568 22323 21742 22077 21207 22443 21913 22726 21809 22067 21242 22105 21504 22183 21594 22535 21792 22067 21273 21872 21728 22567 22016 22557 21785 21982 21305 21957 21626 22032 21838 22297 1601 9555 11521 13569 14011 15540 15449 16086 15545 17059 32746 29419 26882 25811 24233 23767 10820 15191 16540 17963 18054 18880 17892 18470 18391 34897 28797 26816 24593 23941 22854 12832 16573 18863 19296 19889 19206 19500 19532 20160 33967 28854 25578 23856 22578 22932 15415 19323 19877 20232 19408 20487 20395 20976 21251 21503 23004 23618 23213 24163 24430 20471 21030 20443 20289 21013 20227 21271 21600 21981 21108 21973 21819 22830 24266 24436 23596 22903 21640 21607 21799 22000 22405 22859 22394 21815 21044 21187 21787 22429 23075 23276 22992 21916 21061 20864 21536 21155 21592 22105 22491 21712 21921 21417 21941 22050 22625 22452 22610 21570 22104 21730 22007 22114 22481 22114 22075 21687 21977 21919 22535 22221 22376 21767 21825 21751 22178 22230 22327 21672 21785 21781 22420 22336 22497 21751 21768 21600 21778 21548 22391 22008 22067 21494 21968 21865 22321 22029 22094 21313 21721 21921 22084 21769 22375 21679 21972 21366 21983 22098 22734 22190 22352 21376 22116 21486 22176 21846 22528 22007 22229 21419 22281 22007 22715 22033 22057 21454 22211 21745 22361 21783 22497 21798 22019 
21774 22575 21519 21489 22865 21079 22018 21244 22189 22272 21173 22437 20841 22231 22347 21235 21924 20848 22471 21780 21287 22544 20637 23145 21089 21671 21730 21575 22535 21344 22283 20928 22455 21957 21248 22697 20654 22752 21137 21546 22074 21461 22261 21425 21809 21613 21902 22149 21739 21856 21636 21955 22066 21664 21907 21520 21902 22033 21576 21870 21460 22133 21683 21580 22167 21363 22340 21431 21743 22002 21515 22154 21619 21495 22089 22161 22077 22229 22048 22257 22128 22400 22113 22203 22040 22376 21895 22279 21860 22072 21610 21959 21440 21684 21374 21792 21224 21616 21139 21634 21167 21755 21142 21728 21227 21710 21365 21958 21653 22085 21756 22285 21856 22204 21582 22222 21591 22007 21444 21847 21453 22053 21358 21740 21101 21697 21213 21821 21524 22106 21676 22317 21815 22365 21917 22443 21862 22226 21392 21895 21357 21653 21123 21650 21213 21760 21571 22103 21712 22059 21842 22182 21801 22190 21664 21975 21511 21831 21580 21945 21198 21660 21047 21857 21572 22083 21818 22661 22585 23179 22723 22731 22035 21897 21082 20908 20537 20768 20621 20795 20920 21476 21819 22305 15475 18368 18803 19207 19212 19893 19672 19566 19844 35225 24412 22613 21936 21851 21569 22096 22269 22240 22277 22219 22323 22092 22181 22090 22151 22052 21980 21944 21838 21602 21699 21373 21504 21391 21607 21280 21588 21412 21743 21655 21890 21849 22222 21933 22280 21879 22215 21786 22103 21704 21928 21539 21792 21444 21932 21300 21810 21283 21725 21504 21966 21457 22153 21807 22401 21933 22402 21935 22385 21969 22481 21927 22336 21672 21861 21315 21767 21201 21829 21234 21901 21463 22136 21808 22314 21768 22130 21636 22016 21517 22060 21463 21898 21431 21654 21426 21813 21248 21797 21255 21990 21807 22389 21845 22503 21995 22340 21880 22160 21602 22071 21600 21856 21336 21656 21303 21639 21301 21764 21408 22069 21719 22278 21793 22391 22037 22105 21587 21562 21234 21468 20968 21088 21131 22586 22634 23234 22599 22011 22096 21657 20745 20818 20643 21211 21647 22426 22405 22546 21783 21661 21445 21525 20914 21411 21195 21341 21826 21957 22275 22208 22016 21923 21572 21549 21481 21610 21870 21897 22054 21707 21784 21622 21911 21584 21607 21332 21913 21913 22210 22098 22445 22155 22262 21770 21960 21347 21528 21371 21728 21559 11040 18246 20200 20468 20897 20629 21120 20634 21084 20572 26788 23395 23133 22368 22628 22168 22556 21914 22033 21423 21594 21243 21879 21605 22231 21756 22211 21707 22217 21556 21909 21859 22112 21400 21574 21368 22179 21933 22449 21840 22184 21424 21812 21118 21719 21314 21990 21651 22313 21734 21986 21510 21863 21906 21883 21248 21776 21195 21945 21836 22248 21995 22290 21702 21962 21270 21536 21165 21888 21593 22373 22002 22149 21552 21683 21148 21393 20956 20972 21175 22184 22262 22935 23063 22771 22625 22620 21543 21128 20609 20822 21007 21846 22189 22586 22246 21888 21452 21451 21803 21388 21367 21465 21592 21385 21809 21706 22061 22121 22196 22215 22096 21943 21732 21481 21456 21410 21763 21687 21829 21785 22129 21729 21771 21557 21816 21448 21543 21237 21910 21846 22102 21977 22366 21844 22147 21689 21877 21299 21612 21428 22048 21853 22244 21673 21946 21380 21844 20789 21868 21321 21738 21597 22345 22019 22420 21948 22327 21704 22007 21307 21697 21273 21839 21629 22249 21568 21970 21553 21971 21313 21703 21187 22096 21890 22482 21913 22343 21575 21767 21179 21689 21512 22016 21744 22213 21789 22117 21504 21923 21568 21926 18006 20089 20565 21537 21394 22035 21744 22061 21783 29616 23418 22065 21093 21379 21207 21985 22203 22678 22369 22477 21703 21500 21164 21467 20843 20955 21056 21751 22211 23072 22947 23049 22538 22068 21312 21280 20756 20772 21508 21688 21985 22006 21959 21714 21816 21687 21716 21481 21714 21452 21575 21478 21695 21785 22129 21996 22365 22040 22298 21780 21914 21528 21687 21455 21707 21289 21648 21473 21736 21560 22171 21845 22085 21760 21995 21487 21857 21744 21927 21294 21665 21285 21892 21723 22353 22087 22434 21910 22300 21891 22210 21687 22039 21241 21748 21221 21767 21504 22199 21904 22255 21781 22253 21610 21901 21427 21906 21459 21843 21269 21768 21313 22097 21781 22279 21955 22279 21991 22400 21847 22182 21708 21888 21550 21897 21293 21571 21236 21537 21200 21621 21248 21813 21463 21991 21832 22548 22188 22490 22152 21978 21479 21751 21508 21672 21264 21909 21430 21527 21036 21146 20823 21187 21191 21649 21875 22721 22870 23193 22900 23225 22811 22096 22199 21895 22016 21703 21645 21521 21511 21353 21495 21416 21584 21587 21799 21808 22040 21850 22229 21959 22146 21802 21725 21577 21892 21595 22183 21576 21725 21479 17229 20011 21103 21284 21883 21814 22151 21845 22307 21908 24602 22665 22693 21928 22311 21666 22081 21581 22026 21534 21872 21330 21676 21267 21792 21469 22016 21616 22259 21789 22167 21851 22275 21623 22016 21697 22027 21497 21961 21366 21977 21495 21866 21219 21679 21395 22065 21591 22119 21949 22321 22065 22400 21911 22378 21777 22112 21444 21682 21258 21729 21276 21773 21521 22160 21718 22312 21783 22231 21795 22104 21560 21654 21296 21272 21234 21349 21004 21242 20893 21251 21292 21711 21975 22489 22630 22994 22904 22967 22825 22844 22067 21570 21027 20772 20668 21771 21898 22517 22186 21831 21812 21691 21756 21275 21760 21528 21592 21629 21935 22148 22199 22128 22224 21816 21912 21456 21427 21301 21671 21486 22003 21932 22087 21736 21795 21559 22019 21417 21638 21339 21669 21536 22249 22025 22307 21831 22024 21340 21672 21184 21877 21568 22159 21766 22228 21670 21990 21415 21749 21422 21683 21218 21909 21720 22283 21974 22486 21877 22087 21703 22016 21186 21652 21220 21941 21752 22323 21714 21961 21325 22075 21214 21806 21330 22179 21859 22420 21806 22039 21358 21667 21185 21928 21611 22203 21814 22115 21588 21859 21515 21881 20065 21305 21216 21927 21795 22476 22189 22092 21200 23943 21338 21597 21920 22465 22407 22400 21632 21499 21289 21557 21104 21097 21100 22161 22601 23319 22717 22301 21203 20861 20505 20765 20848 21623 21978 22199 22050 21589 21730 21632 22023 21635 21623 21521 21856 21939 22279 22045 22241 22167 22323 21997 22068 21504 21508 21347 21577 21632 22050 21835 22171 21851 22002 21565 21873 21460 21809 21378 21671 21214 21791 21516 22098 21898 22432 22007 22450 21841 22263 21624 22085 21347 21538 21203 21773 21453 21964 21678 22318 21648 21996 21575 21955 21376 21987 21550 21807 21304 21670 21248 22006 21453 22179 21792 22569 21972 22505 21733 22031 21504 21696 21233 21679 21210 21802 21455 22016 21793 22113 21802 22293 21799 22110 21586 22001 21512 21924 21482 21531 21472 21961 21149 21128 20855 21433 22005 22897 22857 23159 22832 22797 22372 22152 21336 21203 20501 20752 20621 20982 20957 21644 21834 22420 22304 22564 22398 22419 21896 21813 21989 21647 21709 21583 21927 21571 21547 21361 21440 21611 21771 22056 22212 22177 22243 21945 21939 21850 21794 21511 21664 21203 21664 21477 21825 21721 22093 21957 22220 21742 22096 21632 21964 21492 21859 21450 21834 21504 21962 21521 21845 21308 21717 21185 21719 21366 21804 21376 22138 21853 22402 21944 22344 21960 22340 21747 22091 21493 21725 21248 21655 21084 21669 21157 21773 21332 21874 21518 22071 21835 22305 21761 22177 21479 22065 21504 22007 21406 21880 21416 21881 21755 22166 21406 21978 21335 21809 21282 21730 21275 21696 21267 21827 21617 22134 21932 22407 22019 22465 21994 22369 22176 22516 22125 22517 22319 22443 21871 22053 21517 21877 21065 21312 21161 21265 20677 20853 20565 20755 20523 20818 20688 20853 20496 20823 20773 21125 21108 21646 21349 21984 22080 22257 22277 22581 22443 22109 22104 21864 21965 21731 21898 21788 21808 21627 21770 21642 21683 21624 21422 21710 22134 21498 21755 21544 21706 21396 21574 21379 21460 21493 21804 21250 21687 21676 21837 21835 22230 21939 22470 22117 22410 22082 22361 21940 22406 22023 22426 21928 22305 21719 22023 21589 22090 21557 22062 21394 22138 21575 22021 21493 21883 21510 21909 21386 21936 21431 21906 21409 21830 21607 22040 21583 22032 21354 21865 21275 21857 21227 21687 21199 21728 21178 21798 21095 21780 21126 21634 21181 21706 21176 21783 21260 21746 21383 21732 21404 21778 21481 21944 21636 22096 21704 21981 21745 22105 21651 22064 21703 22278 21817 22139 21824 22149 21732 22272 21867 22121 21767 22202 21845 17369 19260 20081 20152 20341 19979 20281 19983 20231 29472 25265 22464 22151 21785 21844 21665 22068 21752 21888 21882 22167 22055 22339 22444 22602 22389 11851 19168 21221 21526 21873 21719 22039 21817 21792 21643 27146 23971 22648 22357 21620 21757 21524 21560 21411 21465 21485 21547 21604 21672 21436 21596 21600 16151 19671 20777 21083 21517 21593 21844 21719 22066 21656 25388 23266 22806 22349 22465 22057 22258 21959 22256 21772 21749 21296 21562 21379 21936 21479 21808 18298 20693 20626 21570 21176 21760 21318 21839 21468 30521 23589 22923 22028 22371 21788 22220 21829 22272 21680 22007 21448 21817 21280 21629 21187 21696 21272 20567 20920 21731 21249 22108 21459 22192 21711 22353 24753 23127 22158 22194 21676 22002 21595 21889 21325 21761 21256 21783 21396 22100 21493 21965 21446 21927 21409 21936 21630 22042 21664 22300 21801 22244 21796 22229 21369 21815 21240 21563 21214 21624 21409 21803 21551 22150 21824 22260 22063 22272 21733 21945 21223 21647 21189 21824 21559 21358 21519 21816 21584 22233 21947 22080 21372 21317 20824 21047 20913 21585 21501 22236 22250 22819 22801 23141 22912 23140 22548 22592 22112 22000 21111 21207 20933 21101 21459 21521 21158 21730 21885 22528 22368 22554 22260 22226 21555 21377 20494 20832 20888 21568 21797 22586 22669 23027 22949 22903 22457 22103 21897 21425 21514 21405 21900 21563 21779 21648 21896 21925 22006 21954 21851 21680 21539 21393 21472 21616 22080 21992 22126 22194 22241 21972 21976 21469 21568 21423 21692 21553 21961 21934 22136 21687 21612 21303 21725 21664 22249 22104 22417 21930 21778 21297 21674 21492 21788 21750 22208 21728 21873 21350 21585 21205 21785 21593 22212 21880 22420 22032 22097 21412 21550 21364 21811 21424 21920 21549 22181 21729 22112 21474 21824 21168 21745 21659 22322 22051 22392 21750 21744 21251 21788 21616 21873 21504 21995 21728 22225 21242 21607 21256 21972 21612 22336 21913 22395 21792 22160 21397 21710 21454 21872 21367 22048 21753 22304 21735 21894 21286 21749 21302 21896 21992 22418 22029 22304 21526 21749 21074 21962 21408 21909 21440 22235 21748 22264 21394 21856 21200 22154 21718 22503 21905 22327 21520 21856 21204 21783 21321 21847 21475 21920 21479 22157 21812 22147 21344 21664 21229 21821 21774 22261 21955 22327 21789 21876 21219 21888 21585 21798 21498 22087 21793 22064 21536 21644 21165 21734 21627 22219 22075 22348 21731 21847 21101 21810 21747 21836 21815 22188 21344 21265 21142 22054 22339 23019 22496 21760 20720 21494 21235 21486 21645 22249 22376 22402 21041 20794 20484 21997 22789 23218 22541 22068 20992 21098 21003 21176 21363 22100 22208 22560 22007 21284 20564 20923 21899 22953 22920 22950 22100 21808 21057 21041 21137 21613 21209 21821 22176 22576 21689 21297 20633 21296 21881 22792 23031 22725 21976 21421 20959 21623 21572 21499 21990 22449 21811 21378 21405 21433 21832 21964 22292 22177 22090 21410 21673 21309 21763 22016 21920 21734 21424 21504 21845 22068 22313 22048 21840 21582 21606 21838 21667 21760 21929 22011 21865 21569 21484 21506 22072 22020 22325 21911 21704 21384 13735 18813 19781 20128 20743 20645 20634 20209 20683 20433 26892 24071 23096 22075 21858 11002 18659 20208 21189 21152 21376 20854 21395 21392 21912 27419 23972 22287 22279 22293 22058 18652 20911 21083 21351 20887 21331 21367 22099 21765 28483 23168 22608 22091 22144 21867 19267 20532 21218 20883 21712 21671 22272 21579 21753 21073 23688 21975 22102 21801 22385 19096 21172 21050 22002 21856 22305 21713 21807 21168 21704 23193 22306 21873 22243 21699 21825 21203 21795 21764 22505 21964 22166 21187 21798 21270 21953 21406 22168 21685 22374 21696 21800 21179 21789 21765 22336 22024 22469 21504 21760 21319 22005 21432 21954 21816 22096 21351 21657 21545 22379 22016 22336 21442 21653 21218 22110 21307 22156 21673 22156 21356 21600 21328 22136 21953 22203 21223 21744 21289 21895 21621 22252 21610 21664 21308 22008 21856 22432 21874 21906 21308 21819 21498 22083 21801 22163 21353 21605 21487 22181 21982 22293 21392 21613 21376 21927 21429 22109 21704 21840 21088 21656 21703 22224 22203 22314 21271 21495 21104 21696 21463 22312 22183 21697 20683 21279 21760 22877 22784 22499 21348 21163 20823 21515 
35840 34176 33004 42615 37511 38722 38544 40538 40813 41159 39872 43180 36332 41091 42368 40620 37719 35984 43447 36140 40794 33618 33704 40293 38784 35033 35362 33756 33387 41033 41638 36972 43373 38279 40119 35671 33960 35849 39026 33469 39079 42683 41652 42340 36536 34330 37342 39998 35959 36699 34263 37873 39077 34664 37328 32812 37270 38656 33739 37075 42455 40251 35143 33726 40176 41777 42162 42637 36224 38429 33116 39860 34450 42936 39688 41717 42096 40293 36624 36402 36077 38544 34706 34884 38109 33942 41911 42080 37647 41872 38144 37560 35756 35232 36023 34152 39938 32752 41883 40672 40168 35807 37225 35649 34424 37955 38469 41435 41448 40359 41297 36137 36923 40706 34085 40825 34231 38640 42371 37162 42615 39239 41777 35942 38963 35139 40107 36752 32948 39402 35012 41761 36740 42418 37910 43248 37280 40848 41796 37584 41699 34836 38919 34533 40081 35648 33580 39496 35259 39065 36736 40377 36416 40580 34731 38251 33042 36520 33748 37773 40046 34855 38231 36880 33548 39132 36544 34968 34096 40666 35984 35968 38736 37415 38704 36848 32602 34754 33520 35424 36736 42598 36806 41485 31121 39865 35031 39040 39193 36612 33939 32903 35673 36752 43899 34880 37504 36960 33520 39125 41658 41112 41472 41152 42037 39690 40544 39574 40256 39034 38435 37888 36848 33977 35041 41747 32824 41745 34459 40305 33960 41752 36169 34669 36976 36839 40952 38026 41252 37511 40904 36236 39656 35278 37536 33287 35792 42229 37975 40865 36440 40627 35784 32497 37996 42455 40280 36666 42441 38099 42523 38217 42525 38330 43489 38071 41833 35002 36929 41025 36100 39815 36704 40220 37591 42720 40139 36288 41680 35945 39776 34416 38201 33138 38912 42802 37560 42397 34890 41952 36652 40021 36339 40376 38555 36589 42586 37041 43859 38904 42020 37392 39980 34149 39186 33986 36646 41184 34743 40910 34680 40782 35866 41701 39386 35636 41184 36244 42693 39056 39732 34040 33441 40068 42820 37657 38551 39255 34293 34672 41136 34668 38718 39409 34816 34788 35552 33720 39976 34816 42728 42915 33864 36004 34788 42284 33357 36632 42000 40224 41623 36629 38000 41281 40707 38502 37689 33638 33341 42610 34439 37083 37298 38998 35475 35895 34304 37411 33664 34089 40984 37674 37537 40634 39564 43361 40471 41543 36064 37943 41462 33261 41632 35567 33560 33878 38941 39878 42672 36781 33634 38633 33792 38565 33113 37776 43031 40666 42333 34906 40065 33974 37386 38672 42465 34248 40421 37432 34148 40923 36101 40685 35537 40768 33604 37322 36918 39482 41933 33936 41418 40549 38025 43135 36814 40361 42155 36551 39194 35633 40833 38582 34634 41594 35843 38240 32929 36924 37222 37384 40102 35880 39909 38032 36717 41074 38785 41408 35428 38023 40557 33200 39475 37072 33969 42250 38719 40103 33440 34833 39264 41808 37554 37552 39760 40437 41498 38376 39611 36569 34611 34555 33313 38839 33350 35628 37846 36795 40583 34376 41048 37191 42512 42848 36545 41728 41984 42912 34149 41554 36467 35213 39105 39904 40642 41045 39501 38101 35574 42752 42624 42177 35991 35082 36494 36025 39768 35609 35911 33472 36177 42272 33673 40227 37586 36791 39541 38401 42500 36937 39984 35247 37143 40883 34408 41971 38924 37082 41037 35064 37840 41596 36904 35590 37031 41115 35847 34064 41913 38758 42801 38221 42064 35400 38679 41156 35252 40468 37040 34558 41089 33640 37943 33426 38020 40961 35488 39685 39404 37200 43401 37802 42192 34088 35782 39762 35211 32697 38103 35625 40688 36376 39739 32736 37426 33419 37476 36651 38704 33011 32912 41462 38934 35664 39136 36227 47498 43857 39381 38904 41696 40321 38400 40832 35408 42188 43848 35664 42987 39829 42923 36461 37386 38136 35968 40650 39511 38363 39346 33684 38960 40920 40645 35089 35008 32614 34752 38168 38680 38233 35333 36306 35115 35211 42814 35528 42400 34074 42592 35600 35988 39755 38640 42520 38988 41635 36117 37483 33061 34966 42603 35632 40688 34517 42479 35804 33389 40192 36923 39360 35644 38545 43177 37141 35584 37728 40944 34852 40576 37273 35587 41995 39699 43010 37736 41624 37427 40656 35336 38848 40536 35886 40139 36024 32519 40488 37336 41489 36209 41336 34407 37344 42233 37537 42576 37020 40520 35904 40848 39569 36116 41295 38166 41434 38743 42441 37157 40421 35474 36936 33514 37152 40922 33856 40132 33288 39556 34464 39908 36521 42672 38768 36598 33552 40341 43786 40288 38454 42990 36257 32727 34563 40129 37569 42240 33453 37978 39331 36020 39700 40016 34568 37034 35657 37344 40921 37888 41359 37000 39306 40844 37548 38361 35393 34538 32800 32749 41277 43308 42304 33923 33707 36148 36104 38680 36904 40961 38315 39925 36396 35617 33696 36996 34088 40299 33776 35488 42792 38615 37926 39142 40672 37516 36443 40086 36933 41625 37552 34834 34959 35352 37541 41824 34901 39129 34036 38519 33377 36808 41090 35107 40360 36089 42737 38561 34144 41174 36384 40292 37104 41236 34677 38217 35121 38672 43123 38350 41728 38487 43158 37319 40168 35280 41711 39239 34136 39719 38176 41768 39264 42473 37829 42518 36120 39472 42408 35137 40262 35625 40528 36167 32870 39736 35525 41526 36327 41056 36364 39494 33612 34452 40519 40659 40420 41629 37933 40485 36828 40234 40916 35675 38260 43637 35064 38598 37847 38631 36992 37154 39207 33676 37860 35147 34052 35789 37211 43924 40780 36885 36315 35176 35861 40667 35729 32965 33656 34373 37841 39920 40865 39885 40868 36553 37400 42340 42484 41170 35127 42848 38844 37824 39506 35694 36123 33596 38364 42168 34646 41305 35018 32910 41002 38818 41721 36928 38544 41442 34969 39445 37308 33426 40144 35915 40793 34996 38358 42240 36124 42209 35248 39949 37568 35365 41336 38412 43647 37525 39520 35451 38264 39716 34621 39957 37980 35824 41760 35492 38028 41320 39514 40343 36561 41080 40550 37120 42720 36680 38903 41752 35000 39559 37691 34331 40632 36580 39701 33951 36835 33003 37076 38304 41009 40106 37889 36202 43392 40931 39661 39892 39118 41408 34317 37255 43188 43050 42695 34433 42999 41056 33717 38594 38924 38958 40117 34532 42106 36133 41672 40208 36595 32154 34997 35882 34370 38128 40768 39014 34032 35340 34048 38470 34420 34337 32768 36538 37788 41424 39193 41112 40521 42021 38868 39184 32711 32505 41170 33952 33959 38678 36807 40368 37111 38508 33821 36933 42458 36520 41485 35148 40115 36455 32904 39193 37376 42777 39024 43172 36936 41490 34538 39267 41535 33376 39777 36112 42537 38348 35073 41761 34564 38412 33899 37869 41434 38607 33586 36392 40803 34993 39943 38752 42676 40615 36109 33952 37984 43849 35956 38864 32693 34743 40136 35277 39970 36374 42672 38556 36125 39557 36362 41437 36531 39752 33911 38359 32876 37360 42840 33609 42312 38290 39536 39105 36420 42245 38840 37744 37294 40728 36968 36633 42309 40221 41396 40193 32272 34529 33491 37457 37440 34471 36503 42648 41664 34041 42666 43079 37494 36458 38428 34789 35317 33932 37604 33674 33312 41296 42336 34545 35840 38866 40738 40440 41298 38125 37897 36898 36068 32922 34360 39830 34688 42629 36688 35456 39479 38132 40902 36010 39268 34241 38004 42904 37236 42456 36897 32591 37857 32969 36625 40960 35623 39590 35643 41574 36505 41344 40192 37137 42461 38056 42026 38200 41988 36050 39496 43112 35929 39994 34865 38592 34896 39351 36102 41104 37223 33069 39104 36839 41497 35856 40215 43064 39332 32712 38554 42140 37392 42016 37496 35978 40117 42217 38500 41472 36479 40536 35652 40601 35109 40364 36684 34182 39808 37868 42776 38805 43304 38784 42358 40395 44016 40304 44144 42360 43491 37635 39041 33216 37064 38480 40889 39710 40503 34410 36119 32901 34776 32365 35450 34114 36096 31772 35668 35145 38939 38937 34664 41305 38328 39137 41288 41458 34369 43034 40043 39657 37068 38246 35651 37253 36116 36132 34489 35743 34377 34874 34188 42130 35623 39833 43174 36304 33224 35078 41628 33940 41454 42710 43272 36579 40126 35285 34821 36681 36721 40944 37998 43402 40048 42835 39476 42413 37997 42665 38960 42982 37872 41578 35756 38659 34024 39296 33658 39056 41804 40261 33997 38464 43057 37663 32900 37288 41728 37841 42416 37562 41944 36825 34263 38617 34118 38418 41578 37274 40704 37036 40365 35313 40045 35491 39624 36312 38867 35974 38999 34332 39728 35380 39512 36224 40349 35840 41689 35682 41909 36042 42768 38044 34330 39158 35248 38346 35744 39547 34669 38811 35397 41177 36658 40109 36465 39993 35662 40929 37335 39831 36052 40624 36917 39767 39840 38657 39360 41447 37669 40663 37783 40118 46270 42472 43403 40436 36252 36672 34676 38996 35905 36962 37280 40353 39277 42116 43385 34691 42497 33388 38470 40248 33234 36876 35510 38816 36544 35896 34509 41803 39425 35032 42120 34478 35932 32905 33263 41809 42897 43307 33808 33872 34615 42208 34284 33749 38022 34288 35160 38701 33173 33792 36537 35510 38976 34647 43328 41940 36851 42224 43479 39332 41319 38327 41159 36064 35795 40576 33770 41456 37799 42920 36439 39730 34587 33431 33368 39416 35658 40986 37090 42679 47783 35432 37959 38711 42456 36336 40817 36750 40977 34937 38656 42400 36728 40416 34732 39665 35080 40358 33225 36672 35584 40098 39816 42708 40629 35712 42009 36784 40295 40336 40595 35069 38377 34145 36960 41271 35821 40183 36273 41696 39648 43074 38496 42467 38018 41959 37834 34613 38736 34641 41452 36465 41015 36272 40924 41909 36744 40322 33860 40064 34453 41773 36598 33623 39859 36466 41229 39498 41120 35808 37853 40347 34864 39717 36468 33611 41560 33425 36213 33608 40854 38193 39130 41835 41280 35950 38292 36802 33783 43009 41370 41452 37008 36505 40381 37765 40308 33747 33870 39324 38444 39158 40210 37164 39005 42635 33216 39279 35590 37376 33233 41955 34010 41088 40980 33655 41288 32306 35552 36370 33428 36080 34179 35099 39128 38369 37984 43297 39944 37424 42112 33187 41866 37546 33723 35827 34290 37077 37656 38656 37937 36998 34748 33136 41491 42747 34378 38992 38464 40032 40598 41184 38292 38219 42848 33734 42192 35397 33284 37910 37890 39938 35270 34146 40867 35817 34506 41100 39690 42816 37944 35891 40692 35056 42729 36364 35817 40441 35510 36996 41428 33988 39868 36207 33953 40520 37324 42713 38768 39493 42056 33783 41389 36609 41971 37632 33553 40239 35611 39424 42733 36577 39372 35821 34757 41600 39152 42657 36090 35537 40195 36277 34024 36935 32577 38394 35420 40728 40608 34424 40116 38274 34317 41638 37720 42814 36196 39894 41990 35653 42529 37204 41786 38950 35991 41345 35928 37178 40696 36010 40864 37376 38407 42734 39050 41492 33304 35663 38380 38144 41862 37680 42163 41377 35924 41244 41904 36955 39769 40205 35584 43776 37606 42006 33058 36553 39856 36256 41095 37090 42726 37664 42932 40496 36472 39936 41331 34752 40304 36787 36007 41312 38188 42039 36439 37056 40160 37151 33760 36064 42968 39732 36192 38888 33133 34283 39520 35746 34483 40816 39539 42233 35819 36844 38984 36375 35718 36620 36533 40460 41369 40556 39437 39121 42118 39453 43584 35799 34548 42826 40626 43174 34927 41136 42561 42724 38322 35531 31691 38418 36486 41062 33882 38912 37428 38880 37893 39711 41764 39685 40645 33831 38576 40610 33009 36876 37444 38372 37875 38290 39488 36251 38200 38144 39179 34453 39952 36776 40156 34018 34924 40599 33875 40503 37458 36403 39353 35921 38100 42284 37787 34497 33425 42932 38708 43142 36648 41461 42285 42582 36794 38122 41415 40458 39556 42013 35120 41098 35950 38276 37452 35630 41902 32841 36631 39056 41826 38935 36618 33888 33984 36608 34760 35431 37655 38823 37122 33547 42668 32998 38967 38560 41943 37779 35184 41499 32872 34870 35200 38763 34981 33728 33499 39741 34528 42112 39302 40405 39925 39492 36976 34024 33185 39613 39916 39304 41490 36409 41786 41836 37632 44971 39492 41712 41632 41637 39168 33435 36823 38728 41603 36797 41220 41984 39760 35912 46195 40800 34496 39394 39858 37277 39712 32553 39824 36561 35180 34837 40886 34040 35748 38435 36007 38304 39619 36375 42422 38103 39575 38419 38565 36816 41511 35457 36449 39349 35286 40785 41701 37264 41126 35352 36358 39936 36322 35689 43713 38409 40261 39910 36360 40500 38049 42115 40403 35200 42312 35172 36062 39768 36362 35785 41716 38734 43433 32912 35346 41092 38791 42288 38112 36425 39259 41666 34884 33267 42389 38561 41826 42477 34865 39962 39880 41216 40304 35028 40005 41680 34093 40860 40090 38029 40820 40490 35764 40710 37538 34395 41121 34379 34421 40865 38762 36826 42741 37299 37312 41003 36800 43008 39595 36385 40135 41648 34367 42953 40688 38611 41541 41811 34583 41289 37959 42305 40016 35298 36454 38496 34616 35224 40631 40951 41896 40843 43290 39044 35063 42608 41881 40747 35223 34306 40704 35732 37593 36172 43616 41638 39812 36096 32988 
22727 23663 24781 22744 23236 23785 23258 24288 23119 23682 22981 23540 24329 22823 23454 23517 23296 24085 23187 23936 22705 24359 23213 23109 24359 22540 24757 22629 23695 23050 23721 24120 23083 23903 22852 23832 23996 23296 24133 23066 23854 23351 23327 23685 23241 24033 23059 23588 23425 23631 23863 23428 23538 23547 23396 23921 23224 23554 23321 23481 23635 23442 23552 23198 23697 23454 23173 23795 22994 23895 23319 23417 23645 23239 23628 23319 23216 23794 23108 23969 23056 23439 23479 23540 23673 23321 23246 23730 23144 23971 23013 23566 23288 23637 23589 23405 23368 23419 23440 23817 23232 23716 23137 23824 23479 23451 23424 23403 23321 23876 23066 23808 22989 23767 23525 23622 23296 23492 23238 23968 23084 23927 22995 23853 23281 23217 23462 23412 23579 23460 23137 23894 22962 24121 22959 23558 23308 23375 23499 23532 23039 23994 22870 23968 22888 23501 23346 23352 23552 23409 23623 23174 23441 23068 23228 22945 23364 23139 23684 23393 23849 23396 23658 23151 23416 23148 23339 22394 23457 22794 22922 22576 22957 22938 23650 23977 24518 24085 24367 24402 24711 24257 24081 1875 12535 13396 14148 14630 15460 15412 15476 15909 16920 33466 27988 26446 25751 25027 24523 24327 23994 24112 23946 23944 23576 23612 23552 23545 23372 23452 23324 23475 23453 23761 23664 24001 23895 24199 23875 24068 23833 24085 23809 24100 23678 23879 23580 23818 23340 23669 23111 23512 23011 23345 22954 23482 23249 23808 23460 23955 23463 23863 23296 23744 23227 23656 23045 23599 23107 23021 23117 23606 23276 23644 23110 23453 22902 23557 23207 23848 23344 23959 23522 24037 23568 23966 23389 23738 23084 23458 22916 23225 22857 23325 22797 23343 23040 23669 23218 23927 23397 23895 23302 23648 23184 23473 23050 23041 23159 23469 23026 23227 22885 23304 22913 23392 23168 23692 23462 23930 23636 24080 23560 23921 23559 23653 23489 23546 22906 22804 22441 22772 22912 23746 23860 24263 23744 23333 22919 23174 22864 22752 22779 22806 23137 24032 24239 24656 24322 24128 23398 23031 22379 22433 22519 22607 22856 23705 23978 23565 23548 23137 23384 23163 23374 23030 23215 23405 23608 23763 23770 23568 23437 23063 23098 23022 23385 23380 23760 23333 23566 23150 23363 23221 23424 23004 23234 22800 23290 23120 23720 23543 23950 23529 23887 13073 15639 16410 17133 16976 17768 17697 18256 17973 18576 27099 25980 24645 25287 24512 24393 23755 23848 23521 24034 23840 24404 23855 24169 23453 23719 23100 23574 22890 23360 23063 23719 23434 23839 23297 23565 23017 23931 23105 23428 22949 23657 23424 24021 23488 23953 23436 23783 23089 23288 22929 23287 23032 23633 23393 23773 23377 23568 23095 23426 23575 23373 22855 23281 23260 23818 23641 23901 23740 23836 23296 23050 22385 22680 22891 23627 23954 24068 23672 23495 22925 23098 22903 22865 22562 22848 22554 23296 23590 24329 24368 24500 23929 23607 23004 22467 22233 22471 22770 23339 23820 23484 23633 23351 23504 23133 23400 23123 23794 23196 23067 22949 23188 23277 23579 23575 23864 23526 23749 23457 23570 23042 23224 22944 23381 23329 23690 23313 23497 23021 23306 22922 23680 22993 23192 22740 23271 23215 23867 23504 23867 23313 23558 23004 23343 22780 23399 22933 23559 23328 23670 23068 23456 22972 23134 23079 23285 22696 23338 23100 23710 23399 23984 23476 23673 22820 23158 22872 23515 23259 23809 23128 23477 22824 23389 22785 23345 22736 23392 23280 23861 23548 23804 23280 23638 23176 23285 22787 23173 22931 23575 11800 18082 18641 19200 18934 19912 19175 19818 19175 19533 27093 25494 25096 25524 25088 25037 24389 23781 23288 23475 22540 22713 22936 23873 23956 24267 23890 23723 23195 23179 22691 23127 22784 22761 23004 23136 23496 24261 24462 24044 23692 23316 23303 22889 23140 23058 23321 23322 23594 23527 23573 23293 23484 23194 23349 23185 23833 23288 23355 22944 23313 22954 23435 23368 23613 23361 23827 23541 23913 23495 23820 23303 23463 22922 23192 22787 23232 22979 23654 23330 23795 23305 23619 22944 23399 22999 23552 22829 23276 22890 23358 22859 23481 23229 23823 23460 23952 23383 23736 23276 23552 23021 23414 22944 23348 22784 23355 22993 23751 23217 23790 23147 23537 22999 23455 22966 23440 23046 23567 22967 23161 22887 23242 22965 23431 23183 23623 23443 23825 23535 23921 23609 23835 23781 24173 23840 23832 23106 22991 22433 22496 22157 22430 22175 22461 22424 22871 23046 23520 23645 24143 23924 23892 23599 23457 23178 23055 22902 23285 22800 23137 22922 22853 23059 22983 23071 23020 23303 23243 23544 23576 23725 23579 23798 23559 23683 23400 23628 23324 23456 23099 23287 22977 23165 22917 23072 22885 23374 23268 23604 23303 23739 18788 20385 20131 20681 20469 20888 20546 21533 20817 29450 24539 24228 23431 23785 23109 23561 23104 23639 22966 23434 23249 23910 23447 23941 23480 23960 23372 23840 23238 23595 23065 23459 22887 23263 22769 23204 22795 23265 22944 23557 23160 23756 23410 23800 23077 23553 22986 23424 23057 23416 23182 23610 23017 23360 22903 23356 23137 23724 23540 23899 23596 24054 23666 24028 23491 23792 23226 23399 22964 23019 22681 23032 22962 23494 23452 24180 24088 24355 24096 24169 23712 23534 23283 23266 23090 23588 23282 23320 22858 23105 22731 23041 23254 23873 24411 24685 24237 23864 23338 22960 23214 23052 23249 23296 23709 23619 23715 23537 23451 23329 23463 23257 23481 23075 23257 23357 23857 23808 23953 23767 23969 23605 23621 23158 23354 23158 23616 23544 23880 23516 23891 23360 23589 23201 23481 23040 23345 23257 23855 23648 24121 23608 24031 23528 23809 23099 23403 23007 23508 23421 23893 23428 23751 23152 23590 23094 24080 23033 23531 22932 23482 23150 23858 23623 24013 23543 23847 23069 23396 22889 23591 23382 23911 23279 23633 23027 23226 23052 23319 23057 23751 23584 23951 23583 23866 23268 23412 22955 23299 23053 23567 19367 21739 21645 22051 21606 22075 21788 21708 21328 22531 25417 25161 24499 24298 23697 23077 22489 22620 22630 23031 23552 24245 23902 23608 23041 22869 22933 22800 22697 23618 24217 24274 24320 24596 24203 23718 23282 23018 23107 23008 23367 23388 23671 23498 23448 23219 23265 23128 23274 23164 23296 23040 23148 23073 23532 23504 23908 23662 23736 23364 23765 23168 23309 22909 23268 23062 23561 23367 23792 23375 23716 23133 23501 23005 23497 23175 23420 23060 23460 22813 23286 23047 23678 23575 24043 23485 23952 23352 23667 23040 23430 22784 23360 22923 23460 23143 23752 23335 23671 23335 23637 23056 23590 23021 23417 22898 23488 22798 23323 23017 23585 23387 23903 23576 23964 23553 23946 23456 23726 23286 23511 23011 23353 22856 23317 22912 23225 22795 23434 23301 23752 23351 23936 23707 23897 23223 23073 22886 23290 22965 22953 22603 22816 22652 23420 23766 24440 24119 24555 24347 24479 24182 24097 23552 23330 23108 22996 22500 22383 22208 22461 23063 23066 23456 23399 23690 23570 23665 23431 23374 23182 23218 23603 23302 23051 23155 22907 23227 23099 23601 23506 23785 23612 23825 23523 23700 23223 23525 23056 23208 22817 23164 22905 23113 22938 23314 22997 23424 23180 23742 23302 23796 23385 23733 23201 23719 23166 23540 22921 23444 23286 23576 23013 23300 22807 23220 22938 23623 23258 23788 23399 23995 23329 23977 23485 23991 23483 23784 23275 23596 23099 23401 22749 23325 22745 23256 22766 23308 22804 23367 23100 23538 23249 23687 23301 23783 23367 23787 23365 23655 23328 23600 23083 23419 22939 23387 23066 23611 23162 23600 23175 23363 22823 23131 22582 22838 22419 22920 22624 23116 22850 23364 23109 23346 23473 24205 24000 24248 24234 24448 23919 24207 24162 24484 24290 24576 24342 24485 24219 24283 24000 23902 23705 23563 23125 22988 23152 23019 23182 22882 23157 22918 23047 22889 23074 23012 23200 23160 23472 23302 23461 23320 23573 23393 23714 23445 23645 23415 23687 23368 23511 23255 23455 23162 23412 23003 23337 23008 23306 23174 23319 23181 23447 23067 23496 22946 23579 22903 23351 22829 23297 22888 23387 22895 23452 22922 23493 22810 23304 23040 23522 23106 23533 23082 23576 23100 23609 23123 23640 22924 23363 23005 23466 22941 23552 23125 23668 23237 23813 23495 23898 23556 23938 23481 24002 23527 23940 23369 23970 23475 23933 23533 24018 23441 23971 23476 23963 23497 23922 23431 23829 23472 23748 23494 23808 23474 23716 23339 23655 23236 23520 23162 23459 22949 23196 23136 23417 22983 23160 22848 7175 11779 13383 13713 14300 14337 14939 14904 15386 15607 30371 27520 25938 24988 24633 24088 23780 23431 23524 23186 23276 23097 23143 22982 23709 23683 23694 12738 15116 17001 17505 17621 18084 18315 18653 18824 18519 28286 26642 26087 25505 25404 24985 24918 24669 24552 24334 24205 24138 24064 24033 24098 23915 23951 16843 18567 18910 19227 19078 19494 19344 19780 19669 30960 26152 25601 24461 24733 24153 24333 23786 24068 23635 24018 23751 24209 23840 24391 23931 24314 23911 19578 19985 20634 20315 20810 20451 20883 20513 20881 27178 25556 24469 24709 24043 24595 24071 24475 23944 24429 23945 24505 23995 24445 23920 24261 23849 20034 21359 22258 21697 22120 21671 22144 21603 22346 21816 24960 24103 24219 23661 24089 23571 24069 23632 24009 23532 24247 23754 24242 23590 23992 23417 23840 23293 23703 23161 23701 23158 23754 23334 23940 23537 24066 23781 24279 23927 24288 23848 24176 23617 23936 23389 23552 23184 23514 23277 23505 23225 23690 23408 23936 23584 24048 23656 23912 23357 23568 23047 23358 23394 24007 23957 24567 24394 24653 24028 24019 23301 23148 22859 22931 22821 23232 23085 23397 22535 23166 23019 23348 23273 23974 23865 24217 24125 23581 23059 22832 22459 22746 22855 23221 23459 23904 24118 24489 24556 24536 23879 23703 23173 22892 22777 23118 23144 23213 23321 22999 23436 23351 23732 23658 23876 23447 23458 23109 23207 23142 23398 23513 23714 23779 23855 23872 23872 23623 23237 23107 23264 23269 23641 23265 23399 23303 23688 23527 23768 23373 23308 23141 23564 23657 23940 23767 23867 23195 23296 23172 23639 23307 23490 23320 23858 23546 23642 23009 23416 23303 23840 23630 24063 23592 23794 23261 23364 22965 23456 23088 23491 23185 23729 23446 23832 23304 23553 22934 23399 23002 23768 23376 24004 23564 23997 23247 23369 23091 22915 23069 23616 23371 23894 23424 23680 23110 23312 22933 23620 23485 23981 23543 23904 23113 23469 22887 23554 22824 23520 23059 23739 23414 23816 23118 23383 22916 23647 23237 23891 23566 24065 23518 23653 23161 23383 23184 23609 23031 23673 23285 23900 23441 23787 22957 23413 22962 23725 23398 24049 23591 23736 22939 23360 23213 23742 23051 23601 23296 23834 23467 23755 23279 23571 22900 23331 22973 23553 23501 23980 23528 23831 23105 23358 23006 23482 23042 23506 23232 23844 23415 23600 22910 23253 22998 23655 23409 24006 23609 23899 23181 23272 22960 23717 23059 23476 23377 23799 23415 23463 22769 23449 23732 24323 23833 23500 22598 22980 23140 23264 23402 24123 23706 23507 22539 22583 22519 23235 23915 24614 24310 23993 22621 23073 22661 23126 23209 24042 24074 23936 22888 22545 22296 22897 23469 24320 24419 24360 23789 22895 22780 23289 22886 23172 23351 23979 23973 23979 23177 22574 22325 22964 23639 24472 24490 24109 23063 22776 22775 23195 22991 23267 23722 24201 23520 23041 22381 22621 23905 24014 23933 23712 23538 23102 23261 23232 23382 23229 23633 23418 23392 22940 23351 23539 23827 23698 23489 23156 23280 22685 23282 23312 23616 23601 23400 23113 23126 23188 23594 23625 23924 23473 23347 22936 23309 23200 23312 23277 23705 11431 13819 14280 14918 15228 16195 16162 16590 16142 35906 27929 26170 25832 25766 25308 14141 16291 17328 17632 18465 18519 18897 18201 18523 18512 28480 26695 26543 25507 25231 13969 18517 19143 20006 19940 20439 19952 20156 19892 20216 27665 26566 25507 25225 24423 24665 19962 21291 21103 21516 20554 21410 20897 21336 21089 28717 25593 25074 23946 24587 24153 22083 22332 22388 21753 22396 21864 22396 22218 22816 22325 24852 23792 24113 23773 24429 23981 24299 23602 23767 23621 23959 23412 24134 23752 24146 23367 23687 23143 23882 23586 24289 23849 24219 23368 23705 23223 24077 23430 23894 23677 24114 23460 23608 23203 23995 23748 24175 23725 23680 23063 23879 23221 23919 23552 24117 23407 23585 23116 23858 23596 24311 23665 23831 22987 23810 23268 23981 23592 23756 23048 23505 23524 24156 23713 23991 23175 23543 23750 23650 23434 24022 23357 23514 23145 23737 23680 24160 23579 23604 23128 23681 23214 23753 23629 23913 23272 23419 23214 23977 23712 24135 23427 23592 22980 23545 23211 23695 23614 24020 23376 22970 23085 24135 24441 24478 23211 22968 22848 23453 23196 23897 24139 23974 22575 
21916 23072 21842 22868 22502 22458 22232 22208 22580 22386 21851 22933 21687 23085 22349 22547 22208 22231 22626 22503 21735 22795 21807 23330 21577 22784 21749 22999 21897 23005 22209 22284 22426 22505 21781 22806 21696 23221 21629 22678 21973 22688 22367 22438 22140 22384 22499 22739 21798 23228 21565 23157 21931 22656 22351 22256 22528 22497 22095 22970 21457 22993 21546 22555 22087 22481 22611 22060 21898 22584 21937 22960 21614 22555 21940 22591 22513 22423 22291 22324 22122 22904 21962 22727 21776 22862 22167 22426 22328 22208 22379 22704 21820 22800 21568 22967 21492 22363 22401 22087 22744 22000 21376 22918 21324 23909 21056 22058 22732 21358 23282 21603 21690 23141 20785 23959 21540 21938 22789 21241 23605 21237 21749 22635 21397 23727 21114 22425 21380 22308 23212 21504 22639 21558 22656 23104 21424 22698 21100 22343 23120 21554 22280 21789 22261 23201 21517 22754 21182 23168 22648 21830 22916 20936 23181 22264 22330 22492 22034 22503 22393 21917 22813 21586 22917 21879 22763 22505 21969 22700 22264 22109 22678 21916 22776 21961 22305 22321 21841 22689 22385 22131 22683 21718 22869 22096 7781 9447 10171 11047 10800 12452 12278 35374 31394 30455 28449 28119 26785 26809 25859 25966 24942 25168 24013 24421 23617 24246 23127 23703 22731 23349 22389 22882 22333 22942 22373 22983 22539 22967 22535 23175 22752 23287 22839 23332 22865 23271 22731 23099 22491 22966 22298 22806 22151 22519 22021 22185 21510 21671 21313 22144 22115 22707 22405 23388 23532 24008 23805 24033 23673 23962 23669 24040 23366 23047 22439 21928 21095 21303 20906 21265 21109 21799 21851 22528 22917 23244 23012 22519 22481 22104 22365 22119 22434 22195 22310 22072 22407 21819 22034 21915 22125 22343 22858 22697 23083 22664 22981 22568 22764 22174 22400 22048 22358 21701 22129 21612 22091 21744 22426 21992 22632 22375 22886 22146 22852 22249 22588 21909 22480 22169 22451 21676 22272 21540 22712 22453 23074 22489 22928 22004 22438 21696 22103 21522 22348 21971 22848 22327 22961 22024 22598 21753 22744 21616 22551 21494 22149 21736 22588 22445 23225 22444 22969 22064 22528 21419 22197 21853 22821 22168 22905 22070 22386 22445 22448 21643 22288 21764 22702 22487 23066 22549 23022 22471 22947 22038 22436 21756 22010 21676 22351 21834 22692 5992 8935 10686 12404 12928 13922 14132 14659 14517 33575 31089 30164 29239 28398 27490 26967 25698 25015 23383 22859 22418 22983 23275 24004 23881 23831 23250 23221 22638 22583 22263 22377 21799 22215 22912 22852 23324 22985 23019 22715 22444 22061 22231 21933 22321 22358 22904 22729 22843 22249 22592 22287 22348 21898 22120 21924 22385 22614 23041 22757 23255 22530 22704 21797 22281 21760 22370 22059 22738 22344 22887 22118 22514 22229 22547 21699 22313 21723 22772 22306 23145 22515 23097 22238 22841 22235 22566 21767 22267 21778 22647 22218 23047 22336 22778 21809 22393 21367 22368 21728 22133 21547 22267 21860 22775 22205 23216 22565 23152 22341 22966 21895 22457 21679 22268 21786 22389 22215 22672 22251 22835 22144 22400 21890 22448 21701 22240 21774 22742 22541 23017 22514 23101 22675 22536 22195 21985 21216 21540 21448 22587 22758 23067 22728 22424 21797 22327 21655 21506 21126 21837 22142 23408 23509 23899 23686 23469 22381 21879 20938 21040 21029 21877 22372 23115 22649 22006 21977 21898 22071 21682 22485 22428 22861 22768 22921 22627 22336 21824 21896 21819 22442 22285 22659 22299 22606 22053 22385 21937 22099 21715 9547 11375 13937 14968 16653 16868 17861 17580 18375 17881 30080 27593 26747 25381 25668 24503 24789 23820 24235 23193 23660 22839 23180 22319 22747 22265 22900 22584 23443 22895 23476 22709 23048 22097 22572 21847 22400 21845 22807 22340 23016 22511 22805 21952 22704 22272 22923 21978 22370 21719 22595 22331 22665 22425 23183 22643 23107 22609 22966 22137 22551 21990 22209 21571 22217 21582 22298 22128 22691 22304 22835 22435 22872 22387 22432 21885 21847 21604 21697 21135 21313 21377 22305 22662 23685 23700 23911 23272 22825 23104 22736 21889 21570 21001 21165 21048 21905 22073 23018 22896 22978 22613 22258 22455 22044 22398 21835 22323 21901 21936 21918 22317 22471 22970 22563 22928 22580 22930 22501 22938 22248 22517 21830 22213 21657 22120 21572 22180 21669 22344 21927 22377 22099 22615 22291 22893 22233 22656 22007 22679 21845 22552 21672 22488 21837 22646 21840 22255 21670 22122 21649 22362 21799 22873 22237 22944 22405 23158 22385 23065 22443 22872 22155 22574 22210 22514 21595 22385 21351 22116 21440 22377 21699 22506 22030 22671 22220 22775 22400 22799 22204 22519 21952 22309 21999 22420 22144 22535 21702 22205 21544 22096 14204 16444 16769 18468 19074 20113 20178 20929 20731 29546 27871 26573 25080 24615 23608 23223 22535 22407 22530 22261 21525 21503 21418 21685 22032 22715 22752 23257 23211 23208 22961 23024 22518 22211 22520 22100 22449 22140 22235 22180 22255 21941 22139 22018 22519 22408 22832 22682 22889 22766 23095 22605 22899 22442 22778 22129 22439 21901 22323 21917 22324 22056 22780 22400 23002 22342 22944 22163 22706 22007 22596 22315 22516 22083 22445 21852 22441 21783 22568 21999 22929 22443 23118 22683 23191 22690 23173 22464 22935 22168 22717 21739 22273 21563 22423 22145 22829 22396 22775 22055 22474 21881 22586 21993 22646 21570 22569 21888 22976 22444 23266 22473 22944 22167 22408 21703 22202 21767 22268 22000 22708 22487 22766 22144 22483 21551 22471 21737 22273 21847 22490 22022 23042 22804 23260 22634 22388 21438 21270 21152 22009 22307 22976 22608 23142 22545 22226 21771 21963 21360 21271 21072 22210 22664 23325 23579 23943 23343 22797 22203 22076 21050 20937 21365 22197 22664 22297 22592 21960 22202 22184 21986 21798 22256 22499 22965 22679 22704 21917 22071 21708 22116 22099 22645 22313 22652 22304 22342 21780 22571 21840 17429 17825 19367 19697 20978 20674 21173 20425 20999 20298 25209 24096 24356 23326 23857 22695 23168 22155 22904 22295 22588 21884 22696 22641 23341 22600 23116 22136 22567 21556 22318 21650 22499 22265 22864 22229 22737 21857 22581 21855 22679 21606 22385 21817 22750 22399 23269 22492 23125 22583 23052 22336 22535 21687 22164 21788 22318 22173 22888 22350 22793 22107 22560 21872 22461 21808 22336 21536 21879 21395 21936 22036 23096 23127 23878 23513 23920 23444 22960 22340 21985 21123 21111 20919 21520 22072 22593 22775 23077 22658 22619 21968 21911 21562 22037 21609 21530 21707 21709 22244 22213 22529 22361 22849 22693 22878 22541 22544 22155 22109 21877 21911 21863 22259 21877 22307 22261 22816 22508 22660 22308 22523 22030 22538 21924 22291 21985 22429 21880 22440 21772 22209 21527 22392 21888 22919 22333 23102 22400 23008 22089 22713 21765 22311 21519 22292 21689 22227 21813 22528 22144 22819 22072 22845 21997 22832 21920 22484 21768 22459 21717 22459 21605 22357 21455 22167 21462 22250 21874 22874 22217 23106 22441 22924 22160 22296 21965 22227 21655 22122 21585 22184 21845 22611 22187 22857 22292 22743 22137 22458 21852 22311 21927 22316 21920 21571 21783 22080 21450 21507 21065 21434 21216 21710 21962 21697 21775 22819 23069 23685 23635 23673 23184 23082 22501 22056 21322 21315 20848 20995 20790 21289 20835 21176 21248 22130 22301 22401 22708 22284 22592 22195 22266 22072 22249 22027 22128 21984 22284 22044 22208 21944 22081 21752 22044 21652 22113 21564 22167 21773 22303 22103 22707 22408 22887 22540 23127 22477 22810 22377 23128 22347 22868 21998 22560 21808 22529 21839 22300 21593 22173 21497 22257 21456 22166 21636 22181 21574 22273 21827 22036 21550 22197 21571 22542 21997 22662 22047 22807 22067 22962 22104 22905 22007 22797 22023 22600 21979 22583 21850 22573 21767 22483 21766 22466 21732 22720 21761 22305 21752 22432 21865 22290 21600 22089 21544 22080 21650 22125 21687 22528 22193 22496 22146 22800 22386 22885 22560 23098 22574 23111 22737 23040 22583 23333 23191 23525 23062 23305 22327 22215 21475 21760 21621 21687 21279 21546 21833 21888 21259 21445 21009 21424 21016 21533 21067 21380 21101 21267 21622 21726 21570 21549 21232 21224 20913 21075 20844 21186 22011 21749 22080 21810 22199 21969 22123 21680 21904 21777 21952 22064 22169 22128 22229 22150 22277 22179 22479 22080 22673 22299 22621 22317 22735 22343 22732 22308 22736 22236 22694 22192 22732 22170 22573 21975 22741 22039 22497 22018 22457 1255 5825 7910 10179 10811 12433 12266 13606 13809 14678 34365 32674 29415 28817 26951 26679 25371 25363 24375 24711 23784 24162 23383 23808 23372 23904 23081 7857 9574 13201 14057 15633 15938 17057 17020 17848 34353 32839 30022 29049 27169 26640 25029 25371 23992 24459 23445 23852 23021 23604 22755 23424 22611 23101 11399 13957 14874 16602 17200 18447 18344 19332 19063 32215 29833 28726 26955 26531 25549 25514 24724 24823 24165 24476 23091 23452 22528 23104 22373 22896 13369 14769 16183 17600 17975 18593 19030 19639 19732 20416 29280 28135 26720 26273 25536 25351 24698 24723 24270 24115 23350 23222 22739 21952 21606 21760 21564 17135 17888 18897 19505 20250 20585 21190 21319 22513 22834 27328 26223 25441 24460 24112 23766 23415 23554 23082 23160 22614 22779 22546 22673 22544 22772 22400 23008 22552 22715 22556 22729 22649 22805 22784 23084 22720 23008 22256 22736 22178 22369 21953 22147 21928 22375 22183 22656 22519 22959 22693 23168 22520 22885 22022 22543 21824 22272 21928 22565 21634 22609 22135 22818 22523 22984 22103 22450 21866 22352 21636 22400 21829 22688 22061 22949 22274 23197 22471 23127 22503 23165 22528 23008 22162 22629 21856 22252 21905 22456 21802 22589 21940 22729 22091 22867 22257 22902 22105 22900 21624 22218 21519 22325 21825 22764 22293 23129 22529 23120 22385 23107 22368 22282 21531 22236 21686 22681 21866 22615 21841 22955 22263 22912 22210 22792 21670 22205 21534 22576 22112 22946 22528 23061 22615 23053 22285 22546 21664 22178 21980 22471 22117 22869 22291 22658 21703 22234 21784 22681 22314 23104 22592 23018 22020 22293 21609 22528 21898 22673 22359 22737 22177 22380 21691 21946 21561 22272 22419 23464 23456 23619 22448 21923 21037 21591 21464 22071 21746 22426 22635 23153 22700 22096 21223 21091 21080 23086 23429 24013 23318 22561 21535 21430 21399 21998 21613 21924 22173 23123 22461 21728 20874 21069 21379 22593 22977 23599 23671 23399 22403 22202 21082 21789 21904 21927 22106 23040 22963 22799 22023 21312 21799 21796 22391 22498 23029 22657 22784 22318 22194 21818 21979 21987 22608 22185 22443 22555 22541 22265 22043 21830 22428 22377 22849 22626 22943 22266 22334 21847 22020 21772 22281 21892 22288 22103 22600 22241 22662 22039 22035 21733 22169 22179 22810 22464 22919 22510 22448 21673 22252 21837 22425 22046 22631 22293 22759 22097 22258 21640 22193 21952 22833 22530 22937 22279 22327 21671 22234 22004 22397 22151 22861 21983 22144 21616 22391 22089 22983 22348 22616 21564 22144 21852 22458 21904 22658 22088 22913 21854 22295 21470 22642 22226 23095 22333 22850 21724 22208 21447 22560 21755 22426 22060 22711 22114 22486 21583 22198 21986 22762 22489 23084 22433 22854 21709 22266 21549 22492 21719 22569 22001 22908 22208 22656 21513 22263 21850 22765 22376 23167 22225 22628 21440 22375 21831 22323 22088 22876 22093 22451 21559 22105 21910 22727 22425 23172 22203 22391 21520 22472 21826 22784 22025 22625 21468 22144 21846 23017 22464 23098 22034 22375 21537 22583 21815 22503 22151 22848 22133 22261 21597 22300 22033 23053 22454 22961 21980 22049 3977 7933 9479 11463 12375 13765 13484 14263 14123 36726 33466 31712 29394 27906 26330 10414 12386 14848 15611 17109 16918 17429 17551 18782 35511 33905 30416 28960 27226 27642 13268 15661 16763 18193 17989 18727 18530 19637 20469 21206 31452 28673 26981 26805 25603 17804 18158 18730 18089 18924 20459 22030 21991 21677 20163 28919 27222 26080 25408 25866 25104 20480 19435 20576 21864 22860 23031 22859 21235 20952 25546 24764 24576 24800 24455 23949 22344 22192 22354 24123 24547 24481 23254 22536 21815 22565 21981 22582 22912 23585 23495 23040 21675 21552 22021 23092 23811 24390 23504 22781 21763 22011 22600 22277 22811 22790 23056 22148 22297 22304 22997 23150 22997 22418 22364 21977 22512 22337 22692 22677 22805 22432 22186 22160 22699 22913 22814 22043 22315 22444 22516 22378 22968 22442 22253 21867 22600 22661 23127 22661 22802 21824 22656 22092 22552 22488 22621 22065 22153 22028 22864 22825 23185 22135 22304 21888 22976 22057 22720 22416 22716 21841 22191 21933 22995 22573 23234 22229 22357 21765 22357 21944 22807 22319 22651 21714 22381 22092 23138 22550 23069 21997 22373 21873 22624 
