# Supplementary material for: An Active Feature Selection Strategy for DWT in Artificial Taste
Source: Hindawi journal article supplement (doi:10.1155/2018/9709505), 2018-01-01
Supplement: f1 [file 9709505.f1.zip › puerTea-low-3.txt]

43488 43480 43457 43495 63 7871 16665 20536 21510 22114 21130 20950 20708 21642 22183 23024 22632 22724 22166 22163 21801 21830 21312 22044 22656 23479 23425 22795 22984 22172 22563 22118 22582 22407 22520 22561 22865 22646 23029 22562 22976 22294 22757 22162 22733 22169 22825 21989 22353 22100 22824 22263 23090 22471 23243 22698 23529 22628 23165 22272 22840 21913 22648 21772 22528 21880 22845 21999 23089 22264 23237 22433 23232 22359 23216 22286 23116 22119 23068 21987 22944 22045 23315 22139 22930 21940 22800 21895 22589 22112 22887 22242 23336 22496 23520 22695 23399 22549 23503 22722 23479 22569 23223 22248 22772 22071 22528 21908 22544 21895 22624 22128 22788 22153 23028 22492 23110 22432 23133 22531 23100 22589 23056 22746 23209 22532 22600 22094 22465 21952 22234 21777 21722 21475 22115 22327 23076 23368 23319 23476 23904 23776 23929 23181 22806 22121 21806 21320 21475 21381 22273 22570 22680 23075 22553 23072 22558 22836 22328 22573 22533 22624 22281 22278 22016 22496 22468 22638 22424 23281 22692 23410 22659 23290 22602 22848 22124 22531 21924 22694 22034 23044 22479 23285 10489 17304 18039 18651 18996 20352 19557 20490 19826 20516 28857 25800 23432 23798 22546 23269 22528 23575 22689 23675 22928 23689 22830 23604 22592 23696 22745 23375 22512 23222 22224 22936 22206 22584 21925 22582 21989 22746 21965 22772 21995 23111 22072 23067 22498 23287 22437 23383 22467 22947 22375 23046 22280 22865 22289 22822 22393 22812 22170 22614 21853 22453 22036 22790 22312 22937 22267 22948 22342 23201 22807 23808 23416 23972 23585 23847 23383 23382 22704 22725 21851 21856 21513 22203 21664 21669 21333 21425 21334 21575 21632 21908 22030 22863 22980 23301 23031 23160 22656 22564 22311 22148 22736 22221 22707 22208 22795 22052 22512 22228 22570 22500 22493 22563 22898 22882 23212 22936 23275 22711 23115 22442 22818 21980 22677 22056 22389 22065 22652 21992 22772 22244 23024 22480 23188 22496 23107 22475 23072 22189 22872 22161 22931 22024 22968 21334 23161 21964 22901 21800 22681 21785 22566 21926 22725 22274 23189 22485 23120 22484 23439 22528 23668 22724 23397 22605 23457 22384 23140 22235 22609 21888 22570 21760 22619 21856 22938 22331 23213 22333 23180 22251 22922 22172 22810 22145 22805 21683 22970 22089 22695 22177 17195 18796 20400 20201 21306 21140 22016 21397 22156 32208 26393 24545 24827 24014 24124 23367 23456 22796 22666 21962 22241 22059 21980 21475 22210 21723 21888 21505 21668 21312 21562 21344 21670 21568 21865 21896 22384 22451 22969 23037 23072 22953 22680 23114 22676 23073 22628 22884 22571 22833 22425 22569 22272 22733 22338 22764 22661 22799 22237 22444 22301 22733 21964 22382 21972 22584 22381 23174 22541 23332 22727 23360 22752 23515 22708 23454 22754 23447 22496 23405 22220 22873 22117 22851 21833 22712 21730 22752 21964 22720 22030 22752 22176 23063 22088 23191 22498 23287 22285 23145 22178 23090 22104 23001 22297 22775 21970 22881 22113 22648 21849 22808 22056 22775 21879 22651 21852 22557 21892 22512 21875 22488 21989 22339 21945 22530 21963 22422 21959 22547 21955 22473 21900 22512 21784 22427 21709 22090 21618 22273 21942 22321 22201 22773 22668 23144 23250 23705 23360 23320 23188 23613 23412 23792 23756 24054 23765 23952 23776 23841 23319 23328 23201 23182 23205 22805 23218 22698 23202 22472 22918 22458 22700 22250 22446 22166 22361 22056 22300 21916 22503 21964 22537 21922 22486 21989 22472 21964 22637 22120 22882 16016 20612 20867 21962 21514 22247 21651 22344 21573 22343 25476 24143 22775 23553 22505 23256 22345 23296 22426 23209 22388 23260 22545 23270 22311 23070 22248 23031 22275 23165 22208 23200 22466 23249 22365 23175 22418 23216 22630 23238 22424 23225 22219 23125 22312 23232 22320 23142 22285 23163 22373 23024 22353 22893 22324 22870 22336 22888 22234 22697 22151 22759 22299 22862 22265 22647 22229 22746 22154 22800 22242 22931 22384 22487 22192 22413 22039 22105 22457 22227 22215 22461 21930 22211 22009 22370 22065 22192 22000 22314 22277 22395 22087 22521 22218 22274 22170 22242 22071 22156 22528 22350 23128 22185 22767 22315 22309 22069 22548 22280 22624 22562 22899 22500 22635 22423 22713 22328 22721 22139 22757 22190 22730 22789 22740 22091 22792 22343 22896 22436 22958 22578 23040 22134 22870 22054 22769 21963 22912 22008 22842 22064 22862 21949 22792 21833 22748 21720 22610 21829 22664 21900 22688 21773 22444 21659 22826 21760 22667 21727 22647 21674 22528 21833 22592 21773 22820 22062 22724 22018 23014 21955 22808 21995 22881 22067 22952 22062 22891 22033 22820 22147 22832 22188 22900 22240 22820 22303 22817 22159 22673 22200 20423 20935 22027 21784 22326 21768 22295 21754 22380 26977 23799 22997 23033 22684 22691 22298 22695 22234 22604 22174 22400 22313 22365 22433 22626 22442 22596 22429 22698 22224 22220 22075 22257 22067 22342 22084 22240 22199 22228 22669 22306 22818 22297 22791 22370 22845 22500 22706 22723 22903 22520 22866 22560 22932 22624 22976 22539 23073 22488 23042 22552 23168 22636 23061 22528 23184 22520 23137 22464 23130 22444 23122 22372 22872 22124 22674 21977 22824 21900 22644 21734 22693 21717 22777 21766 22702 21820 22702 21997 22720 22256 23072 22336 23099 22250 23276 22482 23464 22583 23497 22531 23404 22620 23317 22666 23208 22480 23073 22296 23068 22245 23126 22246 23129 22129 22679 21724 22601 21801 22503 22087 22551 22028 22736 22241 22722 22141 22617 22197 22811 22272 22951 22541 23212 22472 23129 22589 23121 22577 23269 22531 22839 22426 22588 21646 21890 21385 21853 21168 21468 21222 21500 21236 21341 21216 21579 21131 21591 21432 21586 21638 22100 22080 22505 22563 23692 23724 23867 23601 22883 23275 22784 23372 22866 23237 22891 23261 22931 23127 22737 23009 22593 22617 22327 22621 22128 22704 21992 22670 21754 22356 19912 21955 21588 22071 21523 22242 21618 22650 22165 22681 23040 23088 22192 22904 22087 22868 22195 23053 22149 23147 22288 23319 22336 23253 22388 23113 22317 23104 22245 22886 22088 22831 21824 22735 21678 22648 21869 22860 22048 23113 22262 23140 22520 23289 22513 23470 22382 23372 22582 23465 22545 23301 22633 23312 22610 23256 22652 23254 22493 22973 22494 23222 22455 22840 22328 22866 22152 22616 22203 22618 22110 22757 22010 22729 21752 22399 21540 21949 21316 21772 21436 21623 21579 21677 21703 21783 21825 22022 21899 22272 21817 22037 21814 21933 21805 22184 21880 22092 21991 21533 22007 22502 21997 22193 22515 22579 23030 22188 22950 22157 22585 22641 22570 22350 22516 22348 22615 22123 22635 22219 22592 22150 22548 22268 22456 22066 22713 22275 22710 22162 22742 22614 22888 22224 23076 21505 22819 22183 22832 22045 22767 22144 22887 22133 23083 22180 22986 22117 23074 22069 22985 22053 23068 22340 23133 22291 23104 22410 23147 22492 23224 22385 23253 22333 23147 22285 23208 22313 23137 22405 23161 22453 23287 22378 23142 22323 23297 22300 23292 22377 23148 22365 23112 22451 23144 22349 22922 22446 22949 22472 22904 22417 22939 22361 22846 22119 22889 22165 22767 22256 22776 22215 22727 21948 22477 21991 22244 21812 22089 22024 22204 21042 21561 21232 21372 21337 21414 21146 21632 21504 21619 21562 21709 22456 23210 22866 23128 23064 23352 23218 23497 23421 23835 23810 23013 23198 22752 23323 22896 23209 22532 22786 22297 22551 22132 22260 22064 22511 22324 22661 22252 22617 22193 22725 22170 22688 22221 22682 22140 22895 22247 23089 22342 23068 22489 23192 22448 23088 22406 23138 22273 23114 22276 22958 22033 23010 21992 22903 21894 22667 21784 22656 21703 22561 21761 22512 21923 22764 21991 23031 22353 23417 22574 23458 22634 23303 22498 23236 22302 23002 22149 22716 21577 22625 21871 22642 21865 22901 22035 22856 22026 22838 22377 23177 22340 23064 22446 22862 22215 22373 21943 22464 22119 22750 22347 22994 22576 23182 22780 23299 22855 23241 22678 23336 22485 22476 21334 21732 21351 21720 21742 22109 21752 22208 21964 22148 22056 22424 22844 23083 23012 23224 22646 22582 22243 22080 21459 21683 21143 21414 21359 21544 21741 22173 22743 22451 22877 22523 22986 22860 23132 22949 23090 22873 23296 22838 23202 22502 22533 22176 22576 21926 22528 21956 22578 22104 22626 21825 22700 22077 22895 21880 22795 22067 22934 22427 23078 22355 23164 22225 23085 22136 22836 22044 22778 21776 22629 21772 22647 21728 14662 17657 19528 19216 20398 19901 20888 20164 21201 39138 28082 24661 24650 23396 24053 22940 23496 22540 23133 22181 23033 21975 22821 21953 22836 21836 23009 16755 20112 20243 21171 20782 21756 21118 21744 21180 32427 25220 24083 22946 23344 22643 23372 22824 23338 22679 23228 22505 23088 22508 22679 22229 22421 9837 19015 20204 20925 20740 21255 20663 20832 20515 20860 26475 23119 22176 22604 22568 23349 23472 23780 23762 23973 23801 23888 23751 23809 23179 22899 23160 17235 21398 21569 22047 21791 22272 21896 22089 21704 21902 24519 23185 22787 22934 22411 22940 22419 23040 22402 23090 22489 23078 22611 23198 22480 22872 21998 20484 21239 22168 21547 22429 21709 22713 21868 22913 22076 24396 22744 23641 22647 23525 22619 23377 22600 23231 22346 23015 22227 22897 21895 22769 21864 22552 21895 22758 22017 23340 22126 22757 22182 23076 22089 23075 22160 23258 22281 23299 22417 23224 22240 22847 22208 22856 22034 22614 21994 22510 21932 22503 21992 22656 22215 23079 22470 23232 22711 23344 23020 23456 22854 23560 22752 22645 22000 21943 21359 21600 21470 22044 21895 22278 22076 22474 22313 22663 22839 23248 23129 23200 22576 22228 21414 21474 21257 21591 22513 23356 23546 23107 23315 22869 23239 22812 23096 22745 23022 22500 22339 22008 22438 22172 22282 22254 22790 22213 23001 22583 23045 22432 23046 22144 22588 21984 22490 21942 22921 22275 23144 22595 23347 22716 23367 22598 23121 22084 22756 21713 22756 21856 22983 21747 22919 21962 22768 22119 22977 22282 23125 22226 23198 22391 23092 22163 22678 21632 22649 21837 22784 22073 23020 22571 23385 22707 23456 22496 23405 22472 23160 21965 22750 21696 22480 21905 22535 21989 22712 22114 22621 22212 22743 22281 23090 22344 23017 22224 22656 21937 22592 21961 22400 21918 22688 22458 22976 23059 23840 23677 23908 23683 23168 22400 22400 21976 21998 21700 21854 21450 21679 21559 21706 21596 22008 21909 22226 21849 22184 22209 22647 22586 22994 23069 22758 23079 22595 23027 22377 22677 22379 22328 22048 22329 22080 22492 22196 22695 22405 22794 22528 23152 22611 23248 22842 23232 22722 23335 22560 23237 22429 22996 22122 22792 21999 22535 21973 22776 21959 22759 22080 22449 21670 22784 22005 23000 21952 22998 22298 23202 22310 23088 22055 22819 21852 22663 21686 22566 21831 22982 22233 23300 22391 23252 22608 23436 22598 23138 22353 23168 22308 23064 22089 22884 21824 22592 21672 22579 21838 22862 21986 22656 22123 22915 22467 22035 22070 22684 22160 22666 22491 23057 22452 23081 22544 23000 22182 22615 22060 22533 21763 21997 21473 22184 21892 22333 22296 23140 23298 23706 23704 23907 23637 23957 23719 23638 23315 23253 22963 22744 22417 22300 21853 21710 21388 21625 21622 22233 22146 22329 22690 22276 23061 22428 22968 22627 22519 22346 22438 22135 22185 22215 22608 22474 22890 22567 23285 22672 23284 22770 23377 22817 23068 22382 22965 22130 22602 21808 22571 21940 22791 22153 23005 21988 22770 21970 22950 22113 22932 22434 23261 22201 22997 22016 22770 21776 22611 21754 22551 21848 22711 22087 23161 22296 23396 22552 23397 6281 17659 18636 19882 18820 19768 19405 20218 19980 20936 30933 25946 22967 23826 22624 23539 16910 20529 20599 21609 21009 21550 20999 21604 21128 33880 25020 24456 23559 23905 23108 17685 20444 21904 21485 22000 20965 21776 20950 21445 21365 24961 23249 23163 23047 23552 17377 21719 21593 21676 20980 21297 20829 21219 21536 22213 25648 24577 24196 24248 23916 23572 21808 22112 21663 21616 22220 22116 22481 22056 22662 24631 23405 23063 23142 22658 22853 22246 22442 22151 22768 22580 23218 22850 23319 22788 23054 22488 22728 22039 22400 21976 22962 22181 22888 22417 23218 22437 22965 21997 22557 21816 22914 22210 23232 22487 23522 22520 23463 22445 23001 21793 22532 21912 22717 22133 22932 22112 23074 22288 23318 22240 23050 21713 22520 21992 22854 22361 23304 22583 23400 22596 23382 22448 22972 21936 22810 21981 22755 22180 22736 22297 23025 22548 23101 22234 22753 22058 22500 21895 22528 22203 22929 22580 23240 22823 23325 22900 23332 22695 23048 21436 21620 21573 22088 22220 22158 22017 22621 22837 23308 22608 22112 21195 21318 21617 22612 23383 23980 23589 23437 22932 22623 21994 21824 
22462 22046 22693 22283 22871 21345 22218 21871 22235 22107 22436 21380 22349 21835 22113 22004 22833 21433 22166 21935 21979 21728 22744 21767 22230 21700 22433 21321 22531 22130 22016 21614 22390 21461 22294 22616 21927 20632 21235 20914 21543 21251 21719 21548 21971 21624 21892 21408 21582 21053 21351 20938 21182 20729 21232 20947 21612 21457 21749 21509 21760 21436 21625 21655 21566 21219 21722 21140 21408 21169 21171 20832 20849 20821 20968 21307 21641 21961 22428 22455 22891 22800 23127 23208 23136 22894 22779 22249 21623 21851 21349 21686 21083 21601 21248 21583 21408 21446 21596 21889 21804 22071 21807 22132 21767 22169 21591 21968 21523 21863 21513 21927 21356 21899 21329 21987 21127 21587 21128 21575 21287 21613 21240 21933 21505 22209 21665 22547 21934 22560 21892 22469 21705 22135 21361 22010 21188 21842 21348 21971 21517 22359 21702 22310 21863 22214 21548 22272 21536 22382 21399 21863 21369 21735 21328 21860 21525 22384 21947 22791 22163 22610 21978 22530 21787 22016 21325 21901 21464 21762 21969 22020 22364 22721 22371 22701 22147 22423 21872 22371 22003 22130 21176 21548 3527 7817 9968 17816 14055 12881 13963 14839 14839 14993 32937 29034 27113 25675 24142 23300 22429 22087 21562 21620 21495 21712 21834 22273 22080 22342 22292 22887 22617 22869 22619 22625 22312 22243 22258 21940 22285 21911 22232 21903 22326 22058 22211 21926 21988 21712 21911 21734 22019 21834 22149 22022 22469 22305 22753 22354 22808 22373 22757 22387 22432 22067 22315 21678 22216 21564 22288 21537 22046 21394 22053 21670 22260 21902 22465 21968 22648 21922 22687 21879 22539 21650 22459 21713 22459 21628 22360 21607 22336 21680 22571 21847 22284 21441 22137 21284 22116 21623 22592 21944 22695 22211 22908 22248 22809 22160 22793 21927 22679 21612 22424 21418 22340 21446 22072 21510 22144 21708 22481 22033 22666 22079 22534 21881 22261 21719 22226 21771 22173 21733 22397 21610 22155 21471 22072 21289 21988 21330 22261 21568 22729 22516 23208 23017 23378 23078 23331 23127 23233 22887 23044 22292 22283 21831 21650 21095 21159 20903 21195 20789 21093 20944 21274 21399 22103 22077 22393 22495 22377 22345 21958 22333 21772 22080 21776 22056 21928 22128 21773 21751 21725 21863 21806 22352 22061 22503 22277 22775 22277 22577 22192 1563 9711 13192 14370 15643 15333 16409 16080 16801 16773 34667 28687 26565 24403 24233 23137 23460 22627 23063 22163 22838 22032 22746 21776 22570 22023 22513 21824 22362 21713 22411 21790 22402 21553 22549 21306 22519 21613 22232 21481 22116 21413 21895 21496 21960 21525 22169 21392 22427 21658 22507 21836 22740 22023 22716 22169 22854 22276 22725 22304 22877 22336 22811 22150 22484 21751 22144 21372 21981 21405 22069 21559 22099 21776 22128 21621 21947 21776 22423 21879 22564 22400 22720 22378 22394 22048 21943 21517 21765 21573 21775 21803 21954 21634 21473 21307 21355 21003 21185 21320 21664 21343 21921 22016 21936 22166 22021 22647 22200 22670 22403 22685 22401 22485 22457 22404 22225 22432 22032 22340 22048 22382 22071 22381 22112 22516 22116 22450 22136 22601 21953 22392 21912 22504 21841 22165 21504 22356 21693 22171 21545 22113 21511 22131 21319 22142 21218 22113 21416 21977 21346 21941 21383 21916 21555 22268 21605 22440 21795 22656 21721 22658 21955 22572 21883 22566 22008 22448 21960 22658 21772 22669 21868 22561 21703 22344 21583 22273 21592 22216 21617 22166 21729 22276 21777 22133 21622 22211 21689 21770 21701 22080 10385 14909 16223 17622 17329 18317 17906 18742 18533 18841 28125 25573 23415 22887 22109 21955 21743 21892 21415 21553 21290 21556 21193 21345 21380 21799 21335 21655 21422 21674 21535 21408 21217 21385 20999 21106 21366 21521 21955 21436 21989 21649 22039 21865 22087 21831 21986 21904 21969 21622 21857 21623 22144 21848 22298 21986 22464 22052 22376 22220 22560 21925 22317 21910 22538 22044 22685 22144 21894 21528 22008 21399 22060 21651 22068 21539 22169 21422 22135 21434 22091 21491 22126 21600 22145 21608 22117 21560 22151 21578 22173 21392 21961 21363 21984 21408 22060 21582 22256 21626 22002 21513 22018 21616 22229 21582 22305 21496 22144 21497 22105 21580 22048 21595 22058 21578 21991 21601 22039 21625 21938 21628 22033 21663 22143 21747 22122 21735 22035 21681 22146 21661 22163 21816 22032 21873 22532 22409 22699 22585 22764 22464 22849 22571 22612 22258 22528 22044 22009 21624 21677 21523 21688 21670 21950 21805 21605 21824 22072 22033 21995 22167 22383 22368 22325 22581 21767 22134 21811 22264 21846 22184 21953 22189 22036 22037 21866 22044 21741 22039 21785 21987 21489 21753 21464 21788 21335 21943 22019 22392 22835 16574 19751 20476 20175 20745 20480 21130 20639 21204 20791 23544 22309 22375 21664 22150 21536 22193 21523 22102 21549 22146 21510 22206 21606 21969 21739 22558 22324 22663 22105 22797 22189 22609 22080 22885 22010 22542 22005 22692 21975 22535 22157 22317 21863 22509 21684 22355 21675 22352 21433 22189 21501 22180 21640 22049 21536 21910 21433 21763 21364 21696 21268 21597 21400 21719 21354 21731 21282 21706 21379 21755 21289 21740 21404 21991 21541 21472 21283 22211 21453 21622 21536 21594 21431 21845 21863 21994 21936 22198 22043 22477 22400 22612 22441 22551 22318 22395 22067 22150 21696 21612 21552 21629 20992 20767 21531 21385 21706 21269 21849 21335 21666 21455 21781 21533 21690 21928 22293 21925 22341 21889 22317 22065 22507 22052 22480 22104 22403 22073 22336 21787 22212 21301 21706 21254 21861 21241 21685 21221 21785 21124 21965 21275 21983 21358 22016 21770 22668 20908 21979 21511 22089 21527 22044 21479 22029 21506 22077 21437 22149 21563 22243 21561 22225 21667 22381 21637 22295 21809 22215 21632 22172 21575 21963 21230 21988 21346 22001 21206 21785 21290 21879 21206 21891 21478 21893 21423 21869 21593 22021 21685 22021 19975 20919 20803 21392 21071 21529 21175 21864 21474 23763 22561 22906 22292 22628 22215 22098 21742 21810 21563 21319 21016 21325 20943 21169 21079 21074 21063 21485 21152 21594 21154 21744 21431 21487 21575 21649 22311 22320 22405 22496 22345 21992 22337 21751 22286 21783 22192 21881 21891 21564 21773 21520 21672 21368 21635 21390 21679 21369 21765 21331 21786 21366 21660 21384 21827 21507 22028 21570 22045 21494 21990 21463 22016 21384 22019 21548 22167 21472 22065 21635 22125 21714 22557 21844 22576 21792 22528 21932 22496 22001 22561 22006 22498 21895 22469 21929 22545 21954 22666 21987 22555 21900 22476 22099 22656 22063 22435 22106 22733 22039 22649 21986 22691 22019 22647 21987 22617 22065 22557 22075 22513 21996 22488 22167 22576 22176 22618 22043 22538 22074 22549 22057 22518 22092 22451 22224 22449 22092 22388 22134 22109 21579 21920 21637 21691 21326 21690 21688 21752 21433 21776 21964 21467 20935 21064 20820 21239 20729 21084 20924 21005 20882 21024 20763 21139 20905 20967 20953 20993 20981 21341 21653 21241 21748 21283 21665 21431 21519 21495 21584 21381 21624 21227 21565 21505 21792 21303 21907 21379 21829 21597 21850 21607 21930 21656 21912 21643 22032 21394 22109 21527 22194 21645 22103 21514 22026 21477 22016 21485 22165 21489 22154 21412 22156 21404 22123 21580 22100 21509 22144 21878 22219 21592 22427 21788 22385 21712 22365 21657 22372 21708 22258 21590 22194 21716 21968 21388 21925 21301 21911 21216 21900 21410 21932 21501 22418 21856 22339 22147 22448 22002 22460 22022 22551 22020 22451 21979 22278 21928 22175 21644 21875 21341 21684 21179 21815 21009 21479 21165 21548 21139 21383 20867 21477 21356 21424 21367 21476 20994 21565 21352 21701 21718 21917 21903 22007 22203 22389 22389 22632 21863 21944 21507 21296 20830 20952 20711 20815 21162 21451 21650 21575 22474 22157 22469 22231 22353 22190 22308 22048 22213 21600 21819 21485 21702 21390 21772 21403 22129 21560 21902 21686 22065 21771 22230 21900 22302 21696 22034 21472 22041 21349 21818 21292 21721 21351 22273 21719 22483 21782 22567 21904 22669 22007 22550 21952 22402 21825 22034 21469 21709 21353 21889 21364 22195 21452 22089 21399 22067 21466 21917 21447 21964 21654 22167 21753 22384 21761 22454 21647 22369 21592 22233 21466 22023 21448 21863 21361 21915 21409 21879 21640 22148 21881 22128 22064 22589 22204 22566 22113 22541 22125 22492 22024 22102 21253 21505 20861 21184 20828 21696 21472 21735 21576 21718 21477 21740 21581 21909 21795 5489 10028 12179 13072 14221 14328 15204 15194 15616 40267 32188 27844 25480 23422 22755 22199 22503 22478 20939 21541 21109 21752 21418 21627 21664 21975 13724 11733 14632 16437 16959 17888 17745 18567 18234 18810 34476 29365 26312 25145 23798 23626 22356 22690 21925 22451 21888 22385 21837 22378 21856 22467 21811 9270 13753 17221 17519 19031 18984 19557 19006 19802 19360 30507 26171 24977 23223 23543 22567 23223 22216 22919 22106 22750 21971 22413 21619 22112 21485 22108 14168 17649 18318 19905 19447 20664 20030 20947 20407 21154 26336 25066 23634 23665 22840 22980 22339 22701 22020 22529 21941 22181 21445 21911 21682 22021 21832 20453 20407 20888 20877 21255 21058 21541 21462 21681 23532 22388 21944 21591 21566 20792 20512 20557 20423 20630 20614 20924 20898 21346 21494 21876 21699 22647 22596 22774 22795 22788 22224 21977 22139 21688 21989 21558 21952 21259 21410 21250 21659 21299 21696 21545 21705 21100 21812 21490 21892 21541 21921 21484 22045 21396 22085 21974 22608 21595 22081 21559 21952 21517 21793 21091 21669 21092 21925 21426 22420 21819 23063 22293 22579 21954 22565 21876 22258 21691 22200 21339 21811 21044 21988 21341 22324 21455 22131 21774 22523 21935 22328 21911 22220 21568 22001 21276 21985 21205 21908 21282 22371 21943 22716 22065 22586 22025 22329 21664 21927 21379 21749 21241 21777 21705 22229 21591 22023 21690 22273 21958 22335 21767 22128 21537 21291 20997 21352 21100 21616 22172 22907 23075 23234 22979 23015 22409 22402 21675 21433 21126 21127 20949 21009 20992 21392 21274 21636 21596 22062 21977 22314 22456 22064 22288 21738 22016 21572 21803 21489 21630 21379 21854 21725 22112 22055 22295 21999 22449 22249 22574 21967 22253 21879 21920 21294 21752 21514 21900 21552 22055 21525 21888 21478 22259 21725 22336 21745 22448 21632 22084 21414 21918 21297 21992 21221 21976 21280 22055 21433 22082 21756 22199 21847 22492 21939 22621 22000 22599 21953 22470 21711 22275 21495 21856 21425 21742 21096 21879 21348 21954 21520 21975 21494 22184 21681 22391 21972 22317 21913 22434 21856 22292 21925 21999 21436 21860 21437 21815 21259 21802 21392 21810 21387 21904 21720 22289 22369 22938 22864 23139 22877 23197 22848 23040 22475 22205 21712 21590 21088 21019 21005 21317 21568 21909 21504 21614 21520 22084 22225 22511 22449 22439 22261 22044 21604 20866 21574 21506 21763 21400 21763 21498 21792 21635 22069 21781 22177 22125 22391 22293 22438 22222 22600 22116 22671 22116 22566 22109 22359 21858 21834 21243 21841 21319 21853 21329 22074 21628 22171 21399 21990 21520 22195 21671 22248 21608 22364 21767 22390 21636 22300 21723 22217 21664 22074 21240 21761 21211 21771 21137 21915 21252 22037 21687 22366 21693 23118 22309 22775 22087 22624 21874 22215 21466 21818 21080 21957 20836 21778 21257 21984 21543 22112 21812 22186 21861 22188 21807 21905 21500 21826 21317 21701 21162 21799 21321 22228 22026 22423 22056 22445 22245 22637 22421 22813 22235 21947 21496 21351 20791 21034 21133 21438 21120 21751 21349 21607 21557 21945 21929 22381 22276 22520 22158 21975 21330 20777 1295 8311 10887 12803 19264 18920 19299 19115 16435 16798 31128 28564 25941 24647 24027 22953 15549 16763 18196 18490 19114 18664 19441 18600 18963 27473 28971 26092 24875 23227 23413 15715 18414 18692 19565 19495 20248 19872 20596 20205 27501 24775 29017 24978 24208 22771 14773 17231 19505 19833 20868 20259 21018 20537 21298 20717 27737 24461 24125 22499 22929 17024 19738 19952 21300 21406 22058 21543 22336 21590 22104 24807 23837 22242 22631 21984 22742 21879 22379 22077 22674 22053 22528 21981 22139 21588 21991 21532 22323 22016 22570 22251 22771 22279 22418 21447 21968 21463 22000 21761 22119 21942 22569 22406 22680 21978 21991 21260 21142 20753 21344 22309 22918 23100 23352 22897 22833 21792 21623 20961 21296 21362 21704 21635 22150 22249 22106 22417 22010 22265 21813 21994 21582 21821 21760 22240 22422 22640 22279 22519 22025 22094 21677 21895 21607 22099 21888 21985 21685 22283 21882 22536 21890 22510 21870 22167 21764 22104 21428 21970 21383 22215 21778 22613 22087 22816 21941 22640 21779 22103 21271 22052 21615 22221 21655 22402 21911 22449 21715 22067 21256 22038 21342 22057 21560 
22500 22360 21842 21869 21427 22011 22113 21462 21664 21769 21571 22247 21927 21598 21539 22160 21469 21867 22071 21504 21491 22040 21696 21643 21992 22218 21345 21761 21829 21592 21901 22346 21209 22339 21842 21787 21344 22445 21614 21774 21635 21831 21397 22353 21510 21978 21677 22075 21233 22289 21996 21670 21321 22192 21555 21680 21920 22312 21291 21872 21768 21815 21381 22457 21508 21908 21664 22181 21120 22199 21755 21718 21304 22187 21239 21689 21178 21585 21195 21732 21283 21910 21577 22215 21646 22273 21843 22163 21583 21956 21449 21881 21402 21888 21367 22156 21287 22316 21376 21908 21306 21678 21193 21883 21453 22053 21735 22388 21947 22378 22035 22423 21932 22304 21920 22264 21737 22049 21538 21916 21392 21963 21380 21434 20948 20929 20618 21231 21257 21967 22180 22649 22394 22417 21864 21679 21212 21422 21289 21159 21305 21335 20880 21053 21259 22048 22101 22609 22775 23074 22853 22275 21943 21555 21755 21481 21575 21297 21479 21667 21892 21921 22046 21894 21856 21755 21772 21729 21785 21624 21731 21420 21699 21318 21514 21589 21971 22030 22332 22104 22319 21996 22112 21735 14759 17324 18598 18301 19384 19746 20248 20332 20888 34966 26041 23558 23213 22240 22529 21763 22132 21473 21953 21524 22036 21584 21762 21322 21872 21344 21750 21213 21716 21388 21900 21637 22253 21795 22456 21972 22468 21936 22473 21863 22553 21889 22310 21774 22229 21556 21968 21329 21697 21237 21685 21337 21729 21348 21824 21581 21990 21718 22171 21904 22157 21688 22063 21596 21926 21479 21917 21522 21824 21414 21912 21318 21582 20995 21185 20868 21049 20965 21305 21411 22122 22188 21989 21698 22300 22465 22967 22644 23123 22977 23208 22865 22833 22428 22091 21402 21340 20760 20706 20669 20930 21448 21579 21857 21856 22184 21924 22120 21925 21912 21770 21718 21665 21672 21555 21825 21508 21685 21457 21513 21235 21684 21507 22081 22154 22103 22048 22324 22073 22400 21981 22283 21908 22133 21615 21645 21383 21657 21191 21635 21264 21790 21392 21991 21609 21893 21547 22200 21838 22220 21803 22160 21736 22113 21587 21915 21443 21829 21365 21904 21440 21508 21382 21930 21303 21687 21248 21633 21450 22075 21712 22309 21860 22428 21971 22580 22021 22311 21767 22049 21365 21641 21145 21562 21255 21657 21425 21960 21798 22246 21865 12553 18647 20376 20384 20952 20663 21181 20834 21053 20568 26825 23392 22540 21720 21456 20889 21266 21031 21428 21338 21824 21509 22090 21991 22139 21683 22221 22123 22544 22174 22732 22812 23008 22871 23177 22862 23081 22656 22625 22289 22085 22350 21830 21842 21629 21816 21550 21509 21385 21447 21442 21367 21281 21504 21482 21730 21664 21932 21523 21781 21719 22105 21891 22003 21905 21900 21632 21923 21488 21826 21523 21716 21625 21708 21573 21913 21600 21789 21273 21719 21255 21776 21509 21972 21657 22330 21979 22362 21985 22363 22005 22435 21938 22472 21752 22289 21638 21992 21366 21765 21075 21688 21243 21651 21223 21626 21201 21697 21404 21974 21532 22104 21635 22199 21754 22297 21816 22337 21841 22087 21765 22179 21803 22203 21749 22285 21893 22257 21897 22197 21889 22283 21853 22205 21802 22103 21666 22230 21901 22119 21812 22031 21671 21724 21393 21618 21194 21465 21687 21523 21349 21469 21288 21123 21431 21602 21269 21297 21216 21169 21005 21105 20845 21110 20928 21234 21510 21280 21548 21479 21573 21446 21687 21780 21904 22007 22151 22116 22119 22039 22247 22152 22317 21968 22285 22070 22349 22088 22336 22007 22370 22020 18963 20407 21271 21129 21542 21313 21657 21487 21985 29448 24384 22720 22624 22088 22433 21888 22389 21728 22127 21724 22151 21761 22065 21704 22368 21940 22197 21825 22425 21901 22283 21773 22232 21621 22036 21524 22044 21724 22023 21356 21824 21256 21751 21269 21849 21376 21760 21238 21728 21349 21713 21248 21654 21249 21559 21220 21600 21261 21595 21292 21643 21213 21623 21262 21600 21211 21734 21326 21773 21472 21748 21524 21924 21660 21513 21003 21474 21218 21770 21466 21896 21766 21973 21680 22180 21799 21880 21589 21831 21463 21075 20637 20866 20680 20825 20819 21104 20947 21313 20915 21312 21746 21719 21698 21608 21784 21765 21816 21792 21856 21810 21855 21928 22053 21917 21717 21498 21664 21486 21632 21480 21847 21716 21831 21579 21824 21515 21870 21607 21967 21547 21974 21659 22054 21888 22183 21869 22135 21906 22240 21695 22119 21698 22256 21735 22275 21752 22208 21810 22247 21640 22105 21729 22128 21704 22199 21629 22264 21756 22321 21687 22126 21703 22313 21768 22211 21854 22218 21702 22059 21417 21852 21289 21868 21373 21932 21315 21831 21312 21794 21352 21825 21217 21579 21200 21553 21208 21713 21236 21335 21227 16583 19898 20961 20903 21255 20948 21433 20972 21390 20992 23986 21660 21409 20664 21033 20567 20927 20613 20764 20592 20823 20569 20899 20711 20868 20499 20789 20500 20745 20537 20867 20743 21056 20821 20904 20861 20886 20739 20905 20808 21319 21476 21380 21608 21275 21577 21380 21377 21416 21589 21410 21523 21417 21559 21443 21657 21449 21710 21559 21754 21522 21873 21739 21913 21752 21972 21760 21997 21677 22106 21803 22049 21793 22197 21998 22373 21947 22400 22059 22439 21991 22380 22009 22467 21929 22204 21888 22122 21777 22096 21590 21732 21333 21714 21239 21742 21163 21826 21248 21883 21284 21826 21368 21229 21449 21865 21456 21913 21339 21868 21376 22000 21438 22087 21511 22108 21711 22223 21856 22215 21841 22256 21817 22225 21712 21920 21560 21856 21348 21720 21229 21655 21367 22013 21464 21793 21472 21925 21677 21906 21962 22593 22371 22763 22664 23113 22939 23146 22983 22985 22790 23131 22722 22864 22421 22807 22343 22484 22273 22350 22103 22048 21452 21569 21258 21020 21032 21239 21219 21428 21652 21543 21740 21753 21764 21821 21456 21422 21732 21584 21676 21495 21756 21727 21811 21633 21908 21712 22016 21772 21968 21799 20955 21312 21958 21630 22157 21801 22199 21552 21789 24276 22379 21568 21767 21428 21683 21217 21647 21200 21658 21237 21760 21261 21804 21527 22096 21607 22199 21720 22311 21899 22358 21924 22448 22007 22434 21940 22039 21452 21877 21436 21808 21287 21623 21312 21863 21177 21696 21250 21989 21351 21972 20960 21525 21305 21864 21437 21850 21448 21864 21411 21882 21552 21863 21415 21966 21622 22003 21545 22098 21545 22088 21623 22002 21592 22039 21788 22241 21956 22306 22166 22512 22273 22632 22368 22617 22180 22226 22070 22256 22072 22325 22145 22677 22237 22455 21949 22412 21976 21514 21164 21432 21104 21303 21095 21446 21814 21716 21988 21837 22035 21933 21905 21708 21864 22037 21904 21851 21965 21882 21938 21881 22083 21728 21948 21636 21976 21787 21845 21484 21824 21608 21961 21634 21888 21595 21892 21521 21701 21403 21657 21235 21644 21188 21622 21204 21685 21206 21612 21170 21659 21192 21621 21287 21762 21376 21885 21357 21879 21400 21881 21363 21928 21401 21875 21384 21832 21401 21760 21428 21843 21507 21966 21399 21824 21319 21856 21287 21902 21428 21943 21280 21943 21636 22205 21815 22105 21905 22208 21807 22269 21769 22241 21813 22231 22094 22308 21975 22369 21940 22323 21931 22377 22203 22456 22470 22880 22707 23063 22701 23005 22881 23049 22802 23173 22659 22657 22445 22631 22397 22211 22075 22155 21847 21152 20909 21248 20927 21136 20933 21005 20843 21195 21081 21282 21569 21493 21931 22075 21690 21584 21687 21691 21888 21792 21989 21953 22160 21948 21800 21623 21719 21549 21721 21499 21621 21376 21485 21312 21542 21248 21575 21352 21716 21482 21973 21704 21912 21575 22088 21792 22176 21721 22194 21945 22294 21872 22360 21877 22448 21952 22428 21970 22307 21831 22151 21611 21947 21459 21846 21108 21869 21255 21866 21488 22234 21504 21827 21378 21832 21455 21852 21537 22232 21601 22130 21463 21863 21316 21781 21074 21585 21158 21787 21418 21973 21708 22180 21962 22453 21991 22247 21661 22122 21331 21741 21169 21609 21317 21844 21524 21839 21824 21790 21480 21755 21906 22427 22205 22636 22434 22464 22124 22080 21369 21185 20709 20801 20603 21060 21238 21595 21968 22604 22532 23058 22912 23092 22917 22985 22561 22566 22322 22103 21853 21580 21551 21493 21517 21351 21547 21483 21527 21640 21633 21784 21909 20909 21738 21692 21937 21790 22061 21845 22183 22035 22187 21952 22119 21792 22055 21602 21913 21568 21628 21380 21734 21385 21854 21498 22076 21824 22356 21964 22444 22016 22505 21947 22386 21925 22333 17185 19602 19846 20364 20167 20647 20235 20793 20160 29735 24192 23131 22059 22365 21671 22040 21571 21841 21562 22177 21713 22325 21664 22311 21859 22295 10372 19096 20173 21072 20970 21419 21095 21423 20941 21389 26635 23629 22144 22125 21491 21767 21577 21888 21696 22147 21939 22264 22136 22507 22615 22951 22636 17417 20935 22113 22197 22711 22522 22834 22633 22836 22368 25652 23500 22602 21825 21474 20948 21097 20928 21184 21107 21249 21179 21545 21629 21393 21701 21516 18971 20510 21240 21319 21499 21571 21722 21648 21916 30179 23592 22467 22163 21713 21770 21425 21644 21304 21491 21440 21621 21448 21876 21619 22310 22121 22404 20925 22009 21737 21995 21693 21941 21349 21796 21194 24425 22044 22010 21354 21814 20933 21945 21492 21919 21517 21900 21496 22112 21615 22189 21702 22200 21744 22265 21734 22045 21499 21841 21434 21812 21232 21775 21173 21744 21238 21964 21508 22135 21504 22306 21851 22395 22080 22441 21985 22426 22003 22360 21927 22166 21596 21816 21352 21670 21271 21808 21380 21694 21399 21773 21412 21760 21626 21995 22067 22484 22348 22656 21399 21328 20749 20834 20513 20725 20629 20992 21107 21684 22070 22706 22837 23168 22758 22821 21703 21120 20882 21042 21472 21584 21716 21750 21447 21489 21669 21738 21804 21913 22066 21937 21932 21706 21677 21353 21593 21396 21808 21655 22106 21929 22326 22109 22295 21959 21930 21383 21708 21312 21657 21383 21735 21965 21816 21440 21905 21531 22231 21736 22199 21653 21987 21335 21637 21165 21580 21272 21643 21298 21970 21561 22176 21761 22430 21929 22410 21877 22236 21626 21760 21226 21653 21354 22035 21362 22191 21365 21912 21472 22077 21612 22197 21753 22250 21780 22081 21459 21867 21235 21603 21164 21549 21485 22081 21845 22423 22058 22424 22002 22394 21877 22001 21178 21424 20749 21123 20986 21482 21135 21749 21318 21696 21655 21896 21895 22248 22148 22591 22395 22537 22388 22540 21952 22065 21589 21829 20731 20704 20532 20811 20801 21290 21569 21671 21981 21909 22200 22161 22231 22109 22121 22050 21909 21658 21817 21478 21671 21364 21571 21264 21528 21425 21829 21784 21781 21571 21827 21472 21722 21452 21957 21571 21947 21740 22193 21812 22130 21701 22006 21511 22019 21391 21686 21141 21662 21129 21896 21633 22157 21861 22273 22008 22371 22044 22307 21814 22044 21378 21670 21276 21721 21277 21893 21476 21913 21424 21839 21440 22049 21398 21888 21619 22170 21607 22255 21831 22290 21772 22071 21627 22004 21523 21906 21371 21731 21330 21654 21167 21769 21480 21957 21692 22135 21917 22340 22121 22487 22347 22805 22535 22024 21393 21590 21386 21381 20829 21094 20963 21339 21173 21303 21198 21568 21225 21416 21274 21459 21380 21872 21711 22087 22066 22459 22414 22405 21328 20979 21504 21234 21562 21393 21849 21767 22136 22106 22231 22237 22274 21980 21941 21668 21608 21324 21472 21400 21664 21477 21780 21831 21773 21461 21744 21507 22026 21798 22131 21861 22137 21698 22133 21560 21778 21446 21719 21227 21671 21293 22155 21710 22374 21825 22442 21931 22356 21968 22289 21833 22149 21521 21864 21278 21762 21326 22105 21354 13865 18312 19781 20035 20323 20156 20999 20597 21443 20774 27175 23612 22983 21668 21959 9775 18744 20026 21143 21253 21843 21437 21964 21657 21931 27591 23594 22199 22169 21802 21916 17874 20537 20691 21411 21304 21851 21540 22183 21992 29010 23162 21424 20881 21197 21254 18893 20999 22299 22471 22837 22645 22697 21958 21575 21050 22823 21585 21717 21568 21847 18931 20848 21362 22087 21989 21892 21739 21485 21499 21239 22705 21925 22045 22036 22216 22124 22286 22069 21969 21552 21511 21344 21904 21264 21816 21543 21753 21730 22151 21863 22131 21673 21733 21313 21908 21773 22231 22021 22432 21989 22083 21472 21671 21147 21783 21320 21847 21968 21891 21429 22126 21824 22281 21701 21795 21236 21760 21201 21975 21572 22218 21952 22360 21728 22132 21440 21600 21335 21783 21497 22471 21308 22026 21442 22153 21706 22136 21277 21673 21267 21698 21352 22010 21881 22341 21964 22392 22008 22200 21680 21861 21221 21584 21373 21808 21496 22048 21475 21688 21616 22432 22259 22491 22044 21620 20699 20913 20626 21298 21970 22803 22850 22947 22213 22016 21019 21235 21348 21356 21349 21517 21531 21976 22256 
43859 42503 36884 37198 42208 39057 39701 42759 34825 35746 33614 41153 37936 34210 33104 39758 42920 37431 39338 32716 42688 38990 35034 34492 38276 40875 41520 35863 36531 33832 37320 42082 40309 42061 36870 36174 41165 43440 34649 35951 34279 36568 41848 42294 33133 38130 35083 39253 40391 41499 38704 34935 41024 40521 33684 34635 37316 41611 41120 37135 35737 36488 41633 43507 33101 37175 34549 40288 38931 40822 36164 35401 40761 40741 40672 38751 39743 36853 32968 39059 36663 34979 38244 40000 42671 37785 36419 34328 34552 42596 40976 33538 33872 39767 39990 41537 36293 41548 33604 42375 38112 36105 36719 41660 38890 38545 39104 35206 38597 39271 37221 33044 38027 41463 37608 41344 35894 38805 33244 37392 41621 38409 41632 42536 37393 36915 33458 40320 40475 38467 40341 35185 42579 42972 37242 35172 40020 42402 41032 39808 41099 41575 36423 38404 40515 38850 39630 34501 36451 39457 37328 41264 38181 33554 35871 42752 34109 40603 43073 35058 37047 37495 39021 37339 36761 36004 35852 35430 36000 34253 35473 42066 35405 40979 33115 33720 38026 38819 42052 39744 42139 38759 39599 35872 33280 39026 32613 39681 41010 34924 39992 41336 36588 33877 40409 34641 41143 41088 33555 35621 39799 42776 38160 33040 38503 33719 35520 41044 37139 41208 36032 40155 35444 41646 37527 34396 41225 36345 43117 38384 43328 37887 43456 37400 33797 36971 41667 36216 40945 33619 37841 41163 35255 40324 35194 41226 35658 41270 36480 33890 38272 35465 40297 37338 40230 35140 39236 34139 37529 42932 37936 32989 36156 42000 37591 41120 34112 37472 39680 36269 38245 37490 40947 42184 40023 40619 38565 35100 41440 43415 38874 34952 40040 38636 41068 37460 36930 42936 39821 42084 41628 35193 34400 34141 36736 42288 34119 36721 36712 40336 37680 39745 37782 37454 35874 35369 34595 34650 33364 36259 32706 34842 42311 33192 40179 35060 32691 38992 40140 39814 38852 41856 39473 42486 38694 41536 37554 40008 34617 34496 41640 34896 39824 34485 40108 36337 41544 38731 34240 37120 33449 40369 36922 40848 36544 39936 35704 39562 34016 37504 42377 36840 41652 37424 42151 33120 41477 37908 41078 35356 39955 34378 42280 39590 35269 41572 37079 42905 38453 34125 38458 41863 36138 38816 41750 34677 39210 33685 40250 34809 41968 38176 36265 41116 37234 29762 32922 41240 41671 37400 34203 39721 36001 38391 33016 38363 42850 33904 35248 42229 36766 40330 38277 42176 41539 36507 32804 39179 38608 40176 35116 40850 40075 33573 40232 36050 36675 38765 37613 40737 37592 39723 34899 34529 41231 39581 42384 36835 36657 34560 36278 33472 32665 41475 42739 42531 42048 40787 32788 42576 35701 34496 37632 33056 35816 35460 39537 37315 38608 37383 37376 34146 37504 42732 36696 33033 35120 34282 35181 33600 37353 33880 36086 40514 35698 40352 35876 32777 37904 34680 41792 38608 42356 38528 42479 38912 43078 37997 43363 36089 41292 34612 38295 41719 36026 38528 35056 40468 34738 40208 34554 39744 35169 41829 38437 33256 39318 34448 40595 36043 41481 36563 41856 36873 39472 35909 40328 36528 40757 36013 41426 37451 41239 37497 40632 37277 41440 37209 40833 36445 39657 34817 40868 37640 39922 36458 38903 35043 35442 41637 34432 39748 42784 35360 32962 41249 43017 40947 39267 42469 34240 40370 40924 40128 39657 37955 38902 36310 38953 36867 40213 33029 40243 33559 42685 33975 42201 35379 35805 37132 38736 40193 39781 40000 39040 41369 40163 42037 38192 41536 39392 42354 39543 41899 38968 42376 38720 36564 42012 40861 39296 33428 40747 34860 42971 38556 45888 43810 35909 34456 39193 42985 37269 42649 35639 40037 35670 40077 35801 39008 35272 42083 37991 40682 36621 42861 37728 41491 36220 40896 34560 38587 33067 38711 35607 38640 41647 36550 40248 36109 40473 37009 41400 35735 40338 35541 41400 35481 39981 34752 40053 33792 39936 34005 40357 34248 40657 34725 40103 34608 40391 34026 40016 35746 41216 36186 42452 35957 32900 37328 34716 32743 37574 42608 40296 35960 42552 37402 35787 38147 34792 40164 36444 37099 33897 36521 42643 38781 33921 35952 34104 35718 35699 38634 37248 40896 36957 40812 35841 35456 34989 33959 35801 35728 36301 35904 36676 36240 37070 37587 39015 37744 35433 42912 34787 42833 34428 42543 37139 35308 36616 33824 36170 32961 37015 34232 38208 33504 38065 34816 38872 37064 40517 37344 40072 37424 40911 35517 39784 35164 40996 35907 41165 35964 40461 36418 41248 34534 39511 35591 39637 35265 40650 34752 41184 36121 41671 35343 39886 35443 41640 35941 40674 37161 40823 35378 39072 42197 37090 40738 37264 41853 37939 41060 36872 40784 36232 41334 36618 40032 34022 39600 33493 39779 35384 40196 41525 40591 31576 36375 37255 36794 40400 37288 42312 37772 41883 37568 39347 34816 41783 34222 37952 33104 37002 33408 34939 32992 35728 32928 36435 34711 36034 32009 35207 31886 34618 32473 36000 34855 38005 35840 36532 36393 36416 34727 36599 35520 41088 42871 41832 34320 40544 33938 41383 41731 42235 34184 41747 33290 41915 33892 42183 34921 42336 35670 33588 35747 32864 36885 35793 37476 35812 38087 35584 38583 35112 39552 36496 38834 36160 40590 38793 42516 38284 42424 39404 43264 38824 42608 38934 43412 37984 40743 37145 39808 35968 39234 34020 35361 41160 35447 40433 35991 39568 36558 40036 37523 40624 36600 41574 40760 42647 37312 42342 37760 41477 37303 41411 38581 42539 39731 33127 39481 35639 41024 36919 40884 36820 41089 36655 40803 35325 37314 33472 36565 41301 35556 40332 34876 41664 39051 42653 36331 42481 37916 35095 37241 38112 34253 42267 36682 34969 39959 38382 40514 38928 38775 36480 40331 35820 37088 42807 36978 42120 43682 41424 42421 39904 38829 42554 33798 40181 38052 38027 40551 40325 42317 34768 33304 35553 35815 35618 36544 42360 42554 35777 33600 34754 42936 36217 35711 36337 34213 37232 35174 38245 35952 37936 36373 37382 40817 38203 34625 40115 36403 40716 33429 36032 42400 42840 33712 35751 42041 35223 39960 34857 39644 34800 40305 35703 40460 36482 33191 39136 34362 40611 35536 41720 37623 42274 37784 42988 39002 42966 38000 38936 42560 37441 42340 36391 40785 34650 40681 37280 39728 35083 40059 38553 41666 38343 37319 33200 40768 37110 42464 37095 42339 37183 42032 37491 33294 36945 42161 38461 34439 38488 33443 39253 33478 39140 34578 38377 33946 38772 36223 41013 38107 41576 40442 43868 41460 34915 42048 34841 40180 40932 39353 41189 39305 41958 40072 35370 41088 43520 38336 42768 38409 32951 39319 42273 38940 41079 39060 42464 36654 35282 38233 36843 38738 37945 37351 35301 36855 38791 37269 36960 38227 37302 37709 37284 39323 35464 37888 34298 38053 36210 36744 42843 36570 34052 37945 34266 36853 34065 36988 32883 34976 41910 34873 40252 34641 39578 34471 39776 35172 39916 34377 39376 34896 39637 34481 40704 35829 41344 37621 41704 37544 41833 37497 41649 37832 41968 37405 41635 36755 41904 35772 42080 36992 32832 38052 42024 36565 41169 36951 40816 37637 42176 38216 40513 38152 34348 40704 36709 39618 37435 40535 36704 41569 36071 40976 36618 41065 39753 41697 38572 42346 37986 41882 38060 42525 41049 43371 43707 37671 35664 39502 35798 38967 37577 39296 36570 40612 35136 34747 43080 35143 42712 40960 39524 40263 37029 39175 36968 40016 37318 38988 37128 37825 36231 39936 38800 40631 33749 42800 38052 39351 35207 33568 34989 35107 36922 35940 38400 37936 39994 38070 36197 34427 35409 33402 35301 43034 34624 41261 43200 41100 33511 39875 33960 41245 35513 42752 38506 35239 37337 33843 39168 36055 40118 35633 40409 38087 41542 37162 42192 37443 42984 38036 42967 38341 41689 36896 40107 34437 37896 42573 37031 38896 37298 40448 37233 42688 41232 32816 36375 41472 36742 42700 37146 33163 40713 34156 39661 42818 37380 40951 36177 38408 33828 39288 36287 42072 38477 35392 40231 38232 43290 38820 41351 35016 39712 41348 36032 39459 34314 40936 36874 32953 36736 36224 36181 42662 36276 37295 43008 41105 35063 42754 43369 40123 39216 41759 39842 34772 35346 33481 38136 40471 34295 37892 34489 33253 39111 37702 39751 37991 38724 33841 33728 41516 39853 37128 33792 33458 42739 33360 41379 33704 42752 33506 34161 34128 35797 37376 37028 35683 35077 37633 36248 39170 36896 40516 38912 40660 37924 39910 36076 39052 34064 37378 33449 34276 41393 35837 41664 37221 43042 39585 36464 42092 38347 43191 38602 43877 38336 42528 37895 42057 37890 33184 35753 41323 39760 34064 39972 35614 39137 39076 41452 40592 39360 42565 35204 38668 33756 36496 33560 40102 35416 41792 34786 41669 37169 41586 27149 37436 39687 38438 37548 42218 39125 42472 37459 41857 36576 35488 39680 40081 43099 36209 33740 36855 34956 39904 37976 41364 40118 44093 35040 38304 34929 29860 36837 39592 40762 35968 43927 37186 34832 36812 42120 36294 44035 34701 36320 42552 37380 38871 36880 39552 39094 40263 39984 33488 34331 41552 35425 32875 36496 32289 40116 41321 43386 33987 35346 34263 37429 43976 35190 43223 40455 35416 35767 42016 34729 40721 43126 42453 34629 42209 37337 34346 41543 40024 42672 37330 38713 35751 38529 35300 37777 41472 36288 39815 44234 39219 38811 41613 36669 37136 37943 42903 38057 33141 37179 42912 39776 34609 40504 35367 40481 35724 41345 35807 38933 43228 36900 42291 36540 40117 36256 39619 35701 40349 38280 32821 39892 32740 41305 37164 42795 39367 43200 38570 42953 38867 42256 37993 40253 34171 36224 41338 35013 40540 36320 41505 35476 41905 36210 41904 35765 34377 38487 39242 43569 42450 34994 41842 41208 35191 35768 32096 34632 33527 37203 38992 35041 39139 35625 36987 40369 36393 36774 35281 38680 36388 38054 42560 33920 35199 35745 42509 43107 35125 35600 36232 37477 39058 37801 37780 35274 34944 41384 34196 41603 36391 34703 39520 37831 41910 40001 41732 38361 37760 41792 35524 40731 34857 41668 35978 38120 36425 42101 37550 33292 40896 35724 40657 34768 38277 41421 34605 39528 33926 40312 34727 40646 38260 33664 40006 35794 42979 37969 42720 37448 41065 34587 35414 40172 34757 41408 38950 41601 40899 41845 37632 42544 39668 34373 40489 36055 41158 36073 39166 42648 37395 40379 34257 39411 33639 42796 39480 36935 42933 39313 42881 38752 42752 37449 38499 39763 42106 35252 38924 37796 42855 39648 35950 41024 35163 34662 37111 37392 41136 40104 34662 42656 33825 42328 33835 37605 39033 33997 36429 34984 34281 32304 35560 35412 40684 33752 34788 38352 37525 40592 40226 41256 39964 39949 38962 37542 34677 36361 42713 35189 41444 33877 40086 33193 41909 36841 35895 35955 33608 36405 42464 35734 42413 38280 33748 37899 35754 40408 36448 39771 35321 38544 33028 38346 41997 35280 39168 34929 39020 37303 34279 40105 37146 41127 38770 42473 39130 41728 36614 38863 41579 35033 40496 35645 40656 37441 42672 37773 42034 37157 42135 39079 41969 37216 34336 40136 34406 41358 36888 41307 36074 39260 34628 38404 33102 37111 41817 35795 41044 34791 39681 35978 42666 38287 35221 40000 37815 41957 40048 43833 42535 36864 33579 38336 41744 34127 41527 41851 36247 38754 37489 41448 39862 41168 40224 33605 40096 42150 40863 42806 41858 37190 35569 39424 39168 43504 43161 42916 41264 37792 32634 40026 33738 41536 37075 35929 39874 39746 41222 41374 41333 38516 37925 34733 33968 40992 42728 42096 34817 42648 36176 36629 35975 42528 35840 32759 38448 36267 39888 37120 40029 35179 39872 33601 35676 42288 35776 40304 35088 40839 40372 35587 42353 36694 43056 38092 42168 38198 41369 36825 39987 33064 36752 40682 35811 41223 39808 41648 34229 39510 35407 37952 41121 39603 37847 33421 42128 35544 42209 35479 38668 34784 38032 31332 33840 37815 39402 40436 36918 42449 38349 34728 37700 46804 35443 40669 40459 36405 37449 35280 32513 34197 41847 41075 37145 33205 40332 38509 41264 40832 42160 36552 40008 40472 36121 37717 41688 43733 37350 35001 35382 37921 33823 38147 36971 33792 35269 33332 36689 36305 35944 41464 39680 38545 37199 35789 42864 43456 40819 35716 37607 39041 38777 40805 40039 41621 39402 38184 33311 32773 40970 37376 40292 36525 33392 35734 35415 40056 37239 39928 35000 35511 40842 37536 36048 41046 38767 42845 38679 39384 42624 35191 39338 36236 40972 37120 37911 37270 42257 40199 36468 41287 35389 36105 40229 35689 39811 38488 33680 40675 37932 42200 35591 39772 42256 34120 41229 36310 42968 43672 41328 38848 42336 40309 35410 39824 40837 35052 40374 35220 41313 38890 37366 42052 38357 42624 38828 40626 34937 36899 40183 33818 41692 36377 42864 38951 42855 35261 34025 42591 41589 43956 39184 34315 34470 36597 33464 40588 38279 36667 37047 38217 40801 38455 38048 40420 41509 41766 41705 33324 33090 38009 41161 
23218 23715 23873 23748 24016 23020 23480 23571 23360 23963 23359 23343 23621 23718 23265 23603 24027 23001 23567 23584 23320 23204 23988 23139 23463 23368 23725 23005 24082 23368 23521 23261 23849 23121 23683 23693 23540 22493 23747 23125 23752 23663 23440 23024 23859 23152 23536 23582 23657 23028 23607 23408 23439 23328 24196 23172 23666 23229 23992 22839 23731 23643 23477 23112 23767 23079 23586 23517 23692 23009 23689 23392 23338 23389 24036 22946 23575 23466 23622 23128 24064 23288 23667 23247 23672 22951 23849 23564 23316 23113 23949 23073 23406 23585 23758 23060 23440 23591 22991 23507 24572 22669 23190 24056 23143 22648 24550 23887 22873 22996 24309 22410 23760 24323 22784 22977 24081 23237 22682 24311 23772 22881 23219 24100 22673 23367 24620 22769 23793 23707 23517 23402 23650 23889 23225 23445 23798 23538 23239 23936 23768 23375 23351 23892 23175 23607 23799 23540 23260 22995 22956 22874 23191 23699 23303 23671 23697 24000 23840 23850 23652 23612 23340 23328 23201 23285 23104 23299 23157 23644 23431 23850 23552 23735 23408 23492 23183 23413 23089 23669 23027 23392 23030 1289 11111 14419 13966 15564 15425 16301 16008 16400 15891 32012 26970 26403 25172 25112 24296 24454 23913 24332 23866 24334 23927 24256 23977 24378 23797 24360 23707 24145 23607 24064 23383 23815 23315 23823 23376 23034 23303 23744 23372 23692 23267 23649 22995 23613 23040 23616 23268 23877 23641 23879 23683 24134 23799 24165 23767 24045 23612 23905 23435 23659 23163 23401 23019 23307 23043 23284 23057 23377 23045 23576 23299 23751 23728 24146 23925 24233 23997 23986 23650 23532 23008 23276 23127 23415 23047 23247 23323 23823 23238 23353 23056 23084 22730 22848 22809 23342 23526 24119 24349 24600 24632 24106 23900 23618 23762 23454 23495 23238 23238 23052 23196 22978 23101 23117 23321 23361 23671 23523 23721 23432 23689 23271 23460 23225 23385 23164 23632 23064 23744 23065 23374 22976 23313 23049 23439 23317 23721 23477 23947 23591 23991 23588 23968 23532 23966 23479 23957 23264 23677 23079 23443 22997 23309 22872 23307 22985 23554 22895 23458 23080 23667 23200 23793 23425 23842 23446 23780 23353 23611 23079 23466 22993 22935 23045 23667 23139 23465 22866 23347 23056 23708 23299 23891 23554 23995 23616 23926 23483 23639 23307 23695 13330 16003 16361 17082 16913 17578 17536 18073 17852 18508 27482 26301 25457 25523 24983 25109 24712 24704 24128 24046 23705 23879 23506 23492 23439 23537 23286 23424 23196 23424 23136 23563 23299 23237 23149 23248 22962 23015 22743 22984 22949 23118 23329 23177 23568 23499 23653 23572 23767 23755 23780 23744 23882 23793 23950 23751 23915 23765 23936 23680 23840 23484 23656 23237 23356 22937 23264 23034 23387 23208 23591 23264 23759 23455 23688 23413 23863 23447 23861 23428 23701 23161 23696 23048 23596 23024 23582 23146 23591 23124 23563 23104 23458 22828 23314 22872 23488 23040 23825 23351 23833 23529 24047 23540 23991 23651 23936 23590 24037 23415 23826 23319 23869 23361 23724 23129 23638 23093 23393 22944 23367 22988 23431 23047 23468 23207 23509 23052 23613 23085 23518 23010 23406 22981 23258 22814 23114 22761 22807 22567 22663 22362 22604 22217 22620 22466 22877 22946 23483 22712 22907 22693 23159 23128 23661 23623 24022 23980 24144 23956 24233 23972 24084 23850 23874 23689 23462 23688 23403 23646 23325 23485 23296 23351 23232 23326 23212 23316 23168 23310 23607 23592 23101 23395 23139 23481 23004 23531 23212 23317 23062 11693 17116 18321 18465 19016 18934 19403 19146 19560 19264 27840 25011 24891 24042 24161 23488 24005 23326 23716 23232 23604 23147 23643 23179 23458 23041 23533 23015 23424 22963 23493 22972 23413 23056 23475 22950 23456 22983 23431 23079 23717 23226 23698 23309 23923 23336 23890 23424 23925 23335 23633 23296 23761 23483 23853 23532 24051 23686 23964 23637 23943 23669 23913 23621 23981 23611 23990 23683 24035 23921 24307 24036 24503 24228 24681 24430 24711 24414 24568 24431 24546 24231 24331 24231 24324 24168 24425 24274 24493 24409 24517 24659 24809 24577 24739 24551 24855 24639 24711 24663 24683 24116 23800 24036 23812 24094 23794 23919 23825 23956 23840 23918 23897 23927 23793 23940 23904 24083 23821 24017 23693 24072 23763 23993 23758 24035 23831 23983 23765 24090 23606 24010 23656 24004 23556 23831 23495 23875 23460 23890 23480 24057 23517 23921 23373 23900 23297 23713 23091 23540 23112 23539 23061 23545 23064 23552 23073 23593 23072 23610 23111 23607 23185 23728 23233 23661 23233 23733 23349 23842 23592 24125 23562 24160 23665 24221 23599 24145 23609 24077 23613 24138 23740 24129 23630 24102 23661 24071 23756 24037 23483 23858 18365 20343 20312 20921 20621 21225 20980 21319 21088 30804 26223 25672 24919 25170 24799 25026 24660 24935 24681 24960 24624 24877 24589 24991 24337 24449 24192 24495 24220 24576 24567 24593 24567 24599 24438 24704 24464 24649 24462 24312 23876 23652 23929 23654 23879 23589 23784 23646 23688 23723 23711 23621 23793 23630 23779 23552 23725 23229 23366 23184 23476 23131 23319 23034 23343 23160 23289 22964 23367 22995 23322 22886 23217 23010 23397 23047 23463 23045 23699 22989 23636 23265 23505 23022 23532 23028 23493 23008 23461 23036 23712 23244 23734 23217 23744 23319 23892 23335 23922 23344 23886 23350 23849 23201 23552 23119 23465 22893 23363 22862 23449 22856 23377 22873 23376 22938 23524 23032 23479 23098 23578 23286 23766 23364 23816 23524 23917 23535 24000 23683 23977 23587 23493 23205 23539 23156 23552 22803 23173 22813 22917 22572 22832 22600 23136 23021 23186 23027 23292 22777 22839 23477 23019 22935 23101 22893 23111 22950 23097 23016 23099 23092 23400 23384 23729 23973 24208 24018 23960 23688 23548 23727 23502 23639 23416 23591 23403 23408 23259 23389 23168 23254 22989 23180 22969 23078 22937 23195 22928 23246 22948 19138 20881 21590 21495 21871 21635 22026 21908 22516 22230 25419 24259 24387 23920 24218 23723 24119 23525 23943 23424 23785 23280 23757 23264 23365 22823 23343 22889 23309 22907 23395 23087 23616 23136 23782 23043 23524 23034 23586 23186 23675 23282 23665 23408 23895 23388 23872 23354 23874 23238 23773 23204 23659 23028 23571 23113 23417 23029 23370 22953 23348 22954 23342 22976 23278 22885 23216 22844 23264 22897 23255 22822 23246 22787 23148 22813 22916 22564 22853 22532 23008 22617 23351 23106 23337 23365 23972 23779 24003 23751 24012 23747 23711 23444 23612 23782 23932 23785 24045 24351 24503 24443 24568 24384 24546 24217 23632 23797 23488 23696 23343 23776 23660 23664 23609 23685 23575 23668 23484 23690 23553 23752 23432 23716 23489 23791 23474 23728 23676 23877 23650 23956 23607 23919 23591 23988 23579 24001 23567 23959 23569 23928 23563 23992 23535 23927 23470 23913 23428 23941 23424 23977 23529 23719 23281 23629 23172 23632 23197 23591 23215 23664 23192 23603 23156 23632 23181 23709 23349 23682 23205 23556 23175 23662 23216 23698 23121 23749 23228 23733 23169 23716 22894 23348 22947 23281 22856 23408 22820 23336 22946 23271 22916 23264 22888 23470 23007 23401 22976 23434 23034 23352 22877 23334 22981 23211 22839 23030 22796 23033 22657 23168 23205 22964 23123 23148 22855 23066 22880 23076 22920 23196 22948 23511 23783 23856 23769 23981 23911 24154 23941 24080 24037 24195 23656 23520 23608 23288 23541 23193 23219 22999 23117 22979 23151 23240 23255 23316 23584 23636 23891 23649 23844 23613 23872 23603 23879 23640 23847 23600 23791 23407 23681 23223 23472 23022 23325 22976 23262 22920 23250 22928 23273 22798 23410 23005 23382 22880 23453 23017 23401 22961 23496 22947 23356 22907 23396 23046 23567 23112 23860 23320 23836 23319 23703 23168 23576 22960 23346 22845 23134 22751 23416 23158 23761 23362 24056 23493 23980 23511 24025 23458 23794 23372 23556 23029 23319 22926 23377 22368 23469 23036 23396 23191 23535 23297 23696 23424 23801 23431 23790 23297 23420 22996 23192 22708 22740 22712 23072 23047 23653 23469 24035 24134 24472 24392 24614 24327 24161 23461 23376 22861 22810 22630 22832 22721 23008 22900 23141 22402 23095 22877 23071 23260 23289 23505 23325 23630 23420 23669 23494 23681 23620 23560 23510 23467 23384 23305 22848 23200 22948 23271 22956 23350 23215 23488 23280 23579 23296 23641 23412 23808 23526 23965 23615 23845 23275 23562 23210 23351 22872 23187 22929 23479 22989 23727 23184 22996 23012 23453 7895 12835 13815 14925 14864 15660 15411 16131 15830 16486 29918 27776 26349 26068 25127 25191 24388 24460 24075 24407 23820 24397 23805 24257 23822 24410 23881 13687 15808 17162 17310 18064 17926 18464 18326 18808 18547 28730 26869 26376 25520 25573 24736 24653 24108 24325 23745 24035 23383 23722 23392 23554 23264 23523 16079 17976 18409 18961 18981 19442 19394 19549 19478 30989 26118 25195 24680 24821 24763 24992 24764 24944 24715 24738 24640 24552 23800 23619 23810 23531 23712 19063 20087 20224 20496 20464 20648 20661 20886 20807 27191 24913 24841 24427 24612 24256 24448 24128 24294 24055 24169 23733 23907 23613 23794 23399 23799 19767 21288 21884 22005 21777 22248 21937 22442 22144 22549 25057 24898 24066 24473 23825 24019 23505 23895 23324 23771 23235 23762 23232 23702 23260 23687 23257 23943 23538 24087 23753 24218 23847 24313 23906 24296 23834 24289 23640 24024 23383 23792 23232 23572 23184 23612 23344 23655 23232 23608 23347 23708 23303 23718 23345 23711 23502 24036 23651 24118 23680 24049 23592 23844 23333 23418 22733 22810 22647 22921 22803 23433 23667 24672 24608 24772 24509 24620 24303 24285 23824 23493 23040 22874 22894 23268 23139 23447 23067 23641 23993 24235 23844 23734 23840 23606 23757 23527 23381 23301 23296 23252 23522 23444 23761 23699 23943 23904 23991 23738 23738 23366 23421 23190 23393 23188 23481 23249 23557 23340 23705 23424 23961 23586 23841 23494 23613 23005 23415 22976 23479 23260 23828 23368 24006 23588 24092 23621 24097 23569 23855 23344 23601 23062 23515 22920 23392 23114 23556 23162 23610 23114 23698 23278 23760 23478 24003 23479 23921 23287 23643 23047 23497 22859 23460 23103 23680 23369 23788 23566 23965 23692 24055 23648 23936 23460 23564 23027 23355 23146 23660 23221 23194 23114 23543 23328 23788 23516 24035 24008 24168 23759 23750 22717 22613 22365 22601 22352 22589 22391 22817 22920 23497 23277 23719 23690 24234 24232 24448 24409 24694 24336 24264 23970 23776 23369 23296 23371 23009 23239 23113 23429 23555 23401 23239 23388 23280 23404 23339 23508 23346 23745 23421 23790 23623 23765 23437 23508 23378 23564 23117 23402 23012 23273 22959 23319 22982 23607 23327 23742 23494 23950 23520 23936 23575 24032 23527 23992 23468 23816 23130 23319 22969 23304 23002 23466 23013 23376 23018 23535 23110 23753 23351 23896 23403 23888 23337 23592 23215 23442 22961 23397 22904 23384 22816 23406 22930 23472 23015 23749 23320 23846 23448 23854 23519 23897 23610 23879 23664 23995 23613 23818 23217 23410 23113 23304 22950 23360 22958 23370 23023 23358 23300 23042 23177 23538 23302 23680 23700 24208 24003 24279 23978 24185 23812 24057 23192 23187 22742 22891 22516 22600 22318 22484 22411 22752 22775 23405 23786 24494 24000 23594 23759 23431 23400 23061 23242 23047 23235 23421 23664 23197 23404 23287 23505 23427 23659 23552 23805 23511 23752 23415 23595 23235 23308 22948 23297 22944 23591 23250 23641 23327 23791 23573 23915 23587 24050 23641 23893 23482 23577 22894 23403 22918 23501 23115 23656 23079 23505 23048 23580 23079 23589 23228 23847 23383 23972 23228 23591 10696 13446 13870 14920 14041 14933 14880 15790 15719 36276 28659 27668 26452 26379 25383 13062 15601 16896 16851 17650 17545 18131 18477 18356 18096 29366 26967 26658 25801 25622 13956 18022 18509 19208 18957 19543 19393 19714 19574 20186 29577 27888 26484 26114 25127 24713 19354 20199 20341 20651 20714 20855 20726 21016 21314 27980 25972 25641 25136 24648 23984 20844 21141 21317 21679 22375 22539 22551 22845 22606 22668 24619 24227 23680 23659 23617 23697 23688 23707 23643 23974 23776 24143 23821 23943 23463 23512 23249 23591 23397 23817 23671 24231 23879 23932 23383 23559 23128 23809 23159 23689 23345 23827 23520 24052 23657 24056 23552 23739 23144 23558 23361 23820 23660 24193 23731 24151 23601 23963 23179 23516 23025 23771 23153 23723 23262 23836 23566 24024 23559 24039 23257 23628 23027 23480 23314 23968 23671 24210 23729 24096 23537 23734 23021 23426 23239 23635 23353 23547 23234 23682 23453 23946 23607 23985 23582 23903 23309 23394 22956 22900 22912 23401 23625 24320 24537 24733 24431 24148 23176 22947 22827 23254 23101 23269 23349 24256 24048 23749 22963 22976 22480 22537 22487 22725 
22884 22181 22728 22250 22304 22380 23022 21849 22835 21674 22620 22542 22776 21563 22554 22448 22100 22414 22872 21773 22528 22297 22465 21868 23057 22053 22481 22109 22567 21648 22899 22240 22064 21969 22923 21639 22294 23548 21819 21025 23344 20864 22798 23343 21466 22043 23042 21686 21736 23376 22973 21412 22016 22925 21578 21499 23734 22528 21373 22164 23143 21077 22321 22912 21809 22276 22293 22373 21939 23016 22483 22072 22067 22638 21761 22531 22734 22004 21638 22744 22031 22145 22589 22347 21942 22440 22205 22085 22345 22946 21632 22432 22231 22486 21639 22952 22228 22283 22016 22887 21620 22767 22546 22200 22008 22757 21948 22190 22240 23048 21511 22497 22336 22072 22060 23083 21856 22523 21962 22747 21605 23056 22418 22068 21744 22953 21685 22672 22567 22483 21840 22774 22072 22326 22318 23057 21636 22695 21925 22893 21591 23054 22485 22256 22015 22850 21956 22384 22674 22848 21760 22475 22431 22087 22138 23141 21600 22150 22298 22474 21824 23140 22537 21664 21866 23197 21381 21751 23552 22513 21119 22323 22762 21336 22029 23888 21678 21712 21847 22967 20952 22730 23441 21573 21736 22928 6979 9293 10300 12117 12992 14087 14187 34848 32271 31085 29270 27904 26551 25895 24961 24406 24151 24160 23399 23165 22491 22596 22400 22465 22311 22805 22421 22784 23284 24059 23893 24224 23577 23160 23474 23124 23351 23097 23258 22907 22939 22569 22648 22240 22333 22022 22237 21961 22262 21940 22539 22292 22798 22459 23031 22489 23081 22311 22793 22288 22577 22071 22512 22021 22517 22059 22516 22105 22663 21863 22248 21659 22301 21783 22641 22039 22945 22395 23249 22531 23031 22405 23245 22544 23277 22663 23088 22571 22901 22208 22802 21807 22333 21683 22149 21670 22432 21916 22556 22161 22641 22332 22926 22252 22805 22006 22595 21736 22488 21854 22663 22086 22564 21840 22347 21745 22254 21882 22445 22268 22889 22471 22965 22521 22954 22528 23112 22442 22840 22135 22645 21895 22241 21569 22048 21431 21494 21252 21894 21981 22439 22624 22651 22293 23127 22897 23206 22830 22698 22337 22329 22037 22038 21584 21962 21786 22033 21799 21933 21550 21512 21139 21307 21097 21541 21476 22336 22659 22538 23057 22634 22895 22631 22788 22509 22498 22035 21943 21786 21937 21751 22076 21838 22521 22153 22727 22242 22560 22390 7561 9573 11943 12761 14118 14328 14836 15363 16481 32793 31421 28933 28043 26099 26181 24949 25192 24238 24768 23941 24455 23604 24336 23389 23840 23267 23765 23131 23662 23142 23614 22907 23624 22763 23467 22636 23212 22464 22945 22103 22656 22114 22618 21958 22576 21705 22406 21725 22460 21766 22578 21906 22707 21964 22742 22320 22892 22180 22791 22388 23004 22469 22894 22264 22656 22093 22441 21959 22824 22019 22670 21776 22401 21338 22276 21466 21676 21107 21522 21285 22095 22321 22701 22753 23409 23641 23974 23552 23713 23447 23442 23460 23452 22997 22760 22293 21866 21253 21053 20915 21069 20847 21137 21118 21824 22118 21988 22409 22175 22599 22525 22699 22535 22542 22406 22556 22371 22571 22149 22559 22153 22558 22192 22640 22362 22602 22173 22689 22348 22700 22169 22583 22210 22507 21899 22425 21978 22639 21876 22470 21969 22419 21771 22553 22256 22603 21639 22562 21777 22089 22057 22381 21959 22375 21915 22098 21536 22405 21558 22281 21600 22358 21754 22552 21991 22320 21672 22279 21801 22498 21824 22734 22259 23114 22291 23027 22406 23113 22530 23061 22556 23104 22569 23195 22544 22918 22548 23104 22441 22859 22291 10364 11936 14062 14869 16104 16323 17456 17617 18733 18875 31003 28898 27669 26384 25962 24962 24987 24055 23960 23269 23584 23059 23084 22570 23591 23607 23325 22957 23113 23253 23515 22771 22717 22540 22327 21920 21860 22440 22096 22521 21843 22209 21898 22218 22041 22083 22007 22037 21889 22116 21832 22132 21782 22244 21850 22245 21965 22367 21858 22432 22023 22379 21737 22352 21751 22536 21904 22543 22380 22917 22340 23041 22328 23177 22392 22797 22394 22945 22319 23148 22218 23131 22454 23052 22480 22940 22409 22988 22423 22979 22274 22785 21892 22603 22000 22668 21967 22697 22263 22786 22144 22648 22346 22775 22096 22849 22252 23122 22221 22975 22215 22908 22220 22921 22381 22965 22035 22608 22107 22777 22140 22624 22234 22746 22260 22841 22312 22775 22229 22853 22375 22794 22348 22887 22371 22836 22611 23085 22681 23180 22954 22916 22897 23253 22983 23110 22983 23012 22512 22530 22201 22551 22287 22668 22445 22775 22419 22765 22594 22699 22599 22885 22819 22928 22865 22960 22667 22316 22776 22566 22492 22311 22358 22314 22365 22312 22295 22186 22396 22071 22297 22038 22212 21713 22097 21772 22135 21616 22146 21792 21806 21318 13747 15005 16839 16891 18152 18149 19138 18791 19676 28589 27786 25676 25234 24009 24083 23237 23608 22704 23292 22528 23143 22273 23053 22302 22631 21905 22441 21800 22380 21955 22754 22030 22803 22089 22711 22011 22690 22077 22577 22071 22465 21796 22272 21680 22330 21528 22385 21728 22336 21437 22223 21642 22215 21646 22186 21600 22172 21760 22189 21705 22136 21752 22311 21969 22324 21840 22431 21813 22357 21920 22412 22031 22544 22476 23179 23121 23481 23372 23856 23419 23879 23572 23987 23626 23684 23393 23496 22952 23125 22960 22093 21766 22047 21587 21744 21278 21559 21093 21287 21175 21372 21312 21416 21774 21974 22392 21941 22345 22006 22293 22024 22231 22114 22343 22068 22261 22224 22534 22356 22598 22236 22633 22401 22695 22231 22568 22260 22477 21994 22388 21690 22029 21651 22297 21641 22135 21640 22273 21708 22188 21836 22614 22064 22743 22140 22926 22331 23046 22364 23111 22411 23071 22553 22921 22523 23205 22587 23058 22448 23213 22433 22900 22177 22898 22099 22302 21581 22296 21665 21989 21622 22289 21501 22180 21577 22460 21695 22600 21989 22435 21871 23055 21994 22369 21863 22317 21867 22474 21987 22345 21968 17958 18359 19655 19634 20652 20382 21053 20868 21350 20838 25641 24157 23657 22934 22900 21844 21781 21383 21373 21156 21329 21176 21463 21237 22252 22068 22464 22557 22964 22978 23369 23446 23876 23609 24008 23592 23376 22574 22557 22164 22139 21823 21990 22233 21895 22176 21894 22056 21792 22066 22098 22229 22091 22138 21875 22170 22157 21655 22429 22376 22467 22343 22423 22211 21969 22395 22039 22409 21920 22465 21927 22357 21867 22370 22016 22469 21882 22530 21840 22631 21973 22657 22147 22832 22208 22844 22141 22769 22245 22912 22200 22883 22232 22663 22237 22769 22136 22871 22221 22793 22139 22602 22148 22693 22144 22865 22224 22680 22279 23028 22229 22879 22137 22883 22183 22962 22147 22882 22301 22946 22240 22710 22338 22914 22212 22716 22404 22761 22055 22691 22128 22656 22156 22688 22083 22746 22026 22577 21878 22482 21527 21769 21282 21376 20977 21172 20819 21077 20772 21001 20941 21147 20860 21049 21047 21349 21018 21228 21056 21428 21101 21362 21138 21344 20934 21362 20949 21157 21044 21121 22001 21786 22003 21697 22005 21672 21983 21735 21975 21714 21981 21913 22208 22005 22331 22129 22553 22093 22469 22016 22615 22106 22426 22105 22673 22280 22656 22240 22727 22215 22699 22277 22857 22374 22951 22289 22950 22233 22836 22176 22787 22424 23203 22409 23149 22402 22960 22406 23047 22332 23051 22546 23033 22195 22632 21831 22656 21652 22414 21665 22331 21600 22226 21389 22178 21609 22272 21698 22590 21945 22755 21879 22608 21839 22488 21992 22871 22192 22801 22128 22617 22128 22529 21952 22616 21840 22346 21653 22327 21536 22250 21473 22182 21441 22144 21791 22410 21965 22262 22082 22640 22333 22416 22786 23254 22884 23249 23192 23729 23528 23772 23671 23738 23504 23577 23234 23099 22501 22635 21975 21318 21122 21239 21287 21683 21527 22016 21334 22038 22200 21905 22331 22070 22792 22395 22558 22340 22314 22080 21991 22023 21923 21644 21920 21722 22288 22135 22763 22384 22925 22449 22807 22372 22573 21962 22409 21704 22094 21540 22130 21737 22367 22023 22396 21576 22503 21896 22585 21989 22764 22212 22877 22190 22813 21894 22470 21784 22349 21480 22045 21552 22167 21721 22584 21936 22840 22299 23076 22445 22983 22441 22982 22312 22895 22258 22502 21945 22480 21584 22213 21400 22183 21575 22215 21412 22432 21840 22650 21856 22368 21810 22468 21948 22619 22161 22776 22160 22792 22199 22807 22246 22760 22156 22473 21584 22006 21437 21959 21353 22105 22218 22795 23069 23452 23456 23808 23527 23742 23462 23834 3863 7371 9736 11426 12024 12914 13320 13704 13957 14373 33287 30912 28848 27973 26839 25774 25721 25024 25060 24437 24489 24103 24184 23752 23907 23630 23788 7815 11004 12889 14464 15293 16261 16640 17395 17335 34897 32363 30134 28096 27200 25671 25610 24514 24664 23955 24375 23584 24117 23479 23957 23392 23963 23229 12712 14113 16193 16576 18342 18135 19384 19128 19927 32000 30452 28183 27383 25755 25615 24204 24549 23406 23894 22967 23343 22755 23611 22643 23380 22432 14066 15316 17354 17763 19048 18851 19977 19561 20607 20066 29030 26783 26421 25131 24855 23891 23911 23073 23376 22679 23040 22351 22987 22397 23159 22957 23634 18886 19985 20518 21495 21197 21984 21133 21610 21044 21282 24678 24207 23235 22993 23015 23274 22677 22923 22453 22691 22475 22624 22491 22955 22848 22991 23177 23598 23323 23388 22948 22699 22850 22327 22726 22217 22355 22102 22203 22022 22357 22256 22405 22396 22932 22676 22915 22859 23125 22825 23143 22918 23111 22809 23099 22445 22709 21824 22304 21763 22285 21792 22570 21980 22487 22282 22491 22017 22720 22007 22713 22115 22969 22049 22741 22064 22484 21689 22295 21681 22248 21504 22496 22019 22965 22362 23165 22540 23111 22255 22608 21778 22256 21779 22304 21685 22549 21954 22994 21963 22638 21975 22795 22309 22973 22347 22652 21941 22311 21744 22205 21777 22458 22119 22839 22413 23087 22648 22993 22299 22797 21833 22188 21357 22034 21627 22208 21888 22107 21948 22681 22870 23249 22865 22834 21861 21824 21280 21413 20874 21155 20956 21456 21545 22382 22592 22873 23608 23842 23469 23591 22941 22557 21922 21970 22153 21778 22137 22027 22471 22053 22273 22125 22423 22168 22608 22229 22759 22429 22753 22354 22477 21954 22173 21779 21952 21860 22744 22247 22880 22409 23041 22486 23129 22561 22813 22121 22520 21860 22215 21573 22211 21620 21817 21815 22472 21717 22517 21943 22512 21924 22654 22224 22781 22246 22833 22204 22841 22180 22772 21811 22251 21586 22341 21437 22072 21809 22288 21844 22832 22096 22996 22437 23101 22449 23089 22343 22977 22185 22765 22064 22315 21845 22332 21437 22166 21789 22380 21842 22319 21457 21720 21807 22213 21879 22530 22129 22708 22313 22901 22514 22827 22336 22723 22171 21799 21011 20972 20751 21083 21277 22393 22464 22875 23188 23741 23607 23929 23320 23087 22269 22048 21276 21470 21079 21320 21554 21876 22118 21688 22376 22071 22275 21962 22132 22166 22337 22222 22528 22473 22617 22380 22657 22436 22652 22314 22528 22040 22455 21943 22202 21596 22040 21697 22348 21920 22432 22097 22857 22345 22962 22409 23003 22544 23022 22336 22851 22116 22568 21703 22272 21464 22305 21581 22121 21620 22407 21844 22595 21895 22445 21782 22447 21895 22434 21988 22665 22025 22703 21864 22337 21640 22132 21403 22207 21517 22575 22239 23131 22370 23089 22531 22990 22231 22823 21864 22429 21616 22169 21523 22081 21718 22320 21973 21896 21926 22348 22069 22802 22210 22809 22348 22743 22305 22639 22144 21973 21322 21208 20864 21563 21789 22707 22761 23432 23356 23651 23599 23836 23268 23567 22710 22855 21705 21563 21102 21232 21588 22005 3824 7399 9331 11083 11795 12482 13648 14336 15200 37261 34229 31432 29568 27819 26615 8931 12177 13961 15691 16480 17573 17655 18816 18616 37061 34209 31219 28571 27766 26240 13401 13883 16368 17131 18322 18530 19532 19401 20348 19946 33024 29763 27995 26002 25969 16488 17945 18402 20065 20024 21041 20841 21569 21056 21639 28800 27717 25678 25567 24454 24977 19397 21143 20890 21987 21686 22164 21658 22191 21267 26032 24603 24829 23836 24522 23560 24364 23698 24124 23322 23503 22676 22912 22420 23159 22379 22924 22650 23035 22619 23424 22913 23137 22122 22582 22309 22931 22983 23895 23720 23896 23317 22644 21977 21632 21368 21653 22012 21779 21989 22784 23155 23367 22949 22876 21832 21586 20992 21568 21939 22899 23254 23941 23617 23460 22483 22482 22361 21884 22230 22044 22618 22715 22366 22281 22680 22583 22684 22328 22309 21965 22199 21884 22596 22391 22979 22677 23113 22729 22945 22420 22634 21911 22421 21739 22266 21859 22441 21912 22615 21942 22741 22296 23044 22353 22890 21861 22386 21621 22365 21964 22892 22519 23089 22604 22930 21847 22400 21817 22741 21805 22640 21850 22594 22008 
