# Supplementary material for: An Active Feature Selection Strategy for DWT in Artificial Taste
Source: Hindawi journal article supplement (doi:10.1155/2018/9709505), 2018-01-01
Supplement: f1 [file 9709505.f1.zip › puerTea-med-1.txt]

43488 43492 43497 43484 18 85 11307 16528 19476 20395 21542 21266 22208 21400 21888 21744 22664 22186 23162 22540 23281 22607 22904 21966 22546 22007 22862 22272 23240 22621 23143 22220 22938 21985 22922 22089 23129 22533 23623 22913 23566 22635 23352 22423 23006 21927 22977 22135 23377 21952 23242 22537 23408 22607 23399 22501 23236 22178 23023 22181 23025 22314 23152 22528 23555 22695 23930 22968 23479 22499 23288 22252 22805 22044 22859 22432 23061 22720 23239 22579 23253 22688 23375 22858 23264 22413 22754 22190 22913 22506 23160 22725 23434 23088 23781 23532 24084 23770 24232 23732 24059 23565 23566 23135 23084 22309 22485 22190 22370 22101 22173 21855 22109 21879 22541 22538 22666 22505 23021 22964 22209 22448 22686 22673 22685 22953 22670 23069 22752 23104 22736 23252 22860 23427 22996 23343 23008 23308 22977 23227 22928 23303 22981 23248 22833 23428 22858 23458 22880 23441 22811 23313 22874 23432 22768 23357 22423 23190 22466 23012 22219 22912 22258 23120 22337 23326 22681 23385 22639 23737 22715 23685 22898 23895 22969 23815 22938 23740 22893 23659 22864 23671 22861 23712 3703 16279 18199 20006 19403 20789 20200 21180 20573 21200 30476 26373 24200 24390 23068 23640 22771 23393 22488 23448 22480 23366 22502 23115 22509 23040 22563 23118 22484 23112 22624 23127 22564 23157 22812 23092 22644 23206 22582 23077 22500 23123 22308 22978 22381 22583 22152 22336 21916 22287 22215 22496 22028 22364 21985 22088 21938 22124 21972 22272 21901 22124 21809 22194 21964 22080 21829 22315 22458 23040 22912 23044 23001 23440 23383 23037 23040 23161 23618 23181 23833 23323 23610 23079 23431 23067 23360 23072 23572 23014 23185 22828 23256 22727 23135 22656 23140 22618 23064 22491 23182 22688 23352 22441 23144 22362 23092 22400 22942 22275 23026 22336 23076 22208 23127 22373 23140 22282 23319 22579 23506 22489 23495 22557 23455 22587 23473 22671 23581 22860 23510 22709 23648 22649 23554 22626 23348 22457 23334 22985 23302 22252 23204 22322 22968 22455 22990 22563 23687 22759 23927 23005 23736 22852 23912 22870 23581 22572 23328 22402 22960 22277 22963 22417 23239 22760 23463 22828 23381 22872 23389 22818 23424 22729 23192 22589 22639 22436 23095 22656 23133 22157 22297 21741 22556 22825 23936 23779 24200 23655 23281 22692 15869 18211 19312 19897 21108 21465 21607 20933 21034 36156 25408 23541 23540 23759 24610 24520 24093 22864 22281 22264 23052 23580 23028 23318 22858 23004 22796 23612 23356 23460 22671 23148 23078 23520 22939 23432 22423 23079 23159 23692 22833 22916 22760 23464 22663 23281 22337 23433 23140 23577 22326 23207 22834 23329 22354 23085 23047 23824 22564 23021 22765 23488 22496 23068 22473 23862 22867 23335 22240 23502 22537 22773 22161 23495 23012 23377 22179 23473 22615 23319 22254 23320 22892 23585 22166 23476 22739 23335 22128 23240 23053 23776 22368 23185 22626 23561 22181 22988 22797 23952 22353 23098 22702 23190 22356 23270 23021 23517 22448 22980 22872 23186 22369 23253 23157 23248 22249 23360 22573 23137 22313 23744 23082 22816 22698 23264 22637 22165 23418 24145 22135 22592 23168 22732 21664 23307 24076 22644 21984 23541 22501 22609 21898 24122 23660 22173 22530 23336 22329 22012 23206 24306 22396 22101 23109 22990 22841 22673 23620 22691 22912 22857 23042 22496 23021 23143 23575 22472 23024 22981 23063 22435 23013 23160 23472 22327 23365 22775 23151 22434 23266 23237 23272 22321 23253 22736 23223 22285 23156 23025 23632 14073 20296 20861 21703 20958 22049 21757 22694 21453 22113 26100 24624 23036 23429 22784 23921 23028 23096 22707 23605 22720 22840 22285 23492 23106 23778 22258 23333 22791 23333 22659 22972 22702 23818 22732 23196 22420 23715 22454 23253 22001 23580 22886 23649 22323 23073 22720 23314 22787 22856 22577 23708 22917 22996 22384 23405 22727 23112 22279 22941 22934 23532 22528 22950 22583 23413 22652 23014 22016 23873 23485 22549 22009 23638 22622 22553 21832 23099 23936 24228 22601 22049 22772 23572 22516 22504 22121 23703 23856 22536 21713 22865 23180 22695 22174 22197 23065 24131 23400 22541 23113 22960 23158 22713 22830 23016 23654 23078 22978 22369 23201 22912 23062 22461 22913 23210 23526 22298 23068 22897 23213 22599 22775 22729 23729 22954 23248 22220 23318 22760 23113 22369 22996 22766 23754 22795 23092 22329 23536 22540 23313 22275 23145 22685 23856 22517 23011 22552 23433 22343 23114 22449 23650 23051 23567 22091 23235 22694 23392 22370 23120 22341 23655 22936 23185 22102 23232 22620 23200 22264 22936 22396 23911 22557 23111 22194 23545 22413 23378 22020 23452 23006 23433 22333 23075 22695 23118 22564 23052 22581 23552 22918 20590 21206 22484 21928 22807 21510 22488 22383 23143 27792 23184 22950 23749 22637 22656 22055 23769 23992 22777 21894 22574 23265 22976 22304 22081 23523 24102 22459 22058 23077 23169 22722 22102 22646 24155 23321 22135 21828 23059 23131 22791 22747 22842 23624 22705 22876 22921 23168 22993 22646 22871 23534 22904 22710 22727 23350 22537 22840 22487 23572 22895 22970 22456 23398 22528 23097 22153 23333 22926 23435 22200 23272 22545 23146 22223 23152 22985 23552 22136 23208 22607 23213 22367 22877 22703 23805 22328 23004 22553 23371 21945 23012 22450 23723 22589 23022 22479 23505 22215 23189 22084 23533 23020 23248 22109 23484 22436 23012 22356 23769 22528 23072 22216 23584 22337 23097 22391 23693 22796 22836 22447 23332 22502 22960 22159 23593 22940 22896 22474 23458 22517 22749 22710 23680 22391 22968 22743 23165 22188 22969 23085 23732 22073 22964 23154 22757 21608 23699 23712 22368 22273 23260 22502 21996 23116 24068 21873 22860 23022 22999 21854 23798 23570 22058 22674 23425 22340 21917 23089 24289 23158 21767 22990 22813 23027 22233 23304 23020 22891 22594 23184 22568 22708 22704 23440 22672 22707 22823 23151 22491 22929 20749 22744 21815 22837 22144 22751 21945 23240 22746 22769 23117 23706 22634 22835 22916 23601 22121 23328 22551 23115 22093 23694 22807 23013 22388 23620 22336 22920 22712 23622 22304 23223 22604 23164 22001 23552 22788 23042 22336 23384 21966 22848 22484 23788 22135 23056 22500 23113 22186 23589 22814 23072 22483 23509 22383 22952 22681 23800 22426 22888 22505 23310 22544 23073 22949 23164 22320 23339 22400 22872 22696 23623 22235 23104 22764 23520 22262 23681 22637 22865 22773 23009 21886 22827 23780 22641 22157 23473 22298 22049 23190 23701 21563 23091 22726 22620 21816 23968 23189 21940 22443 23205 22385 22075 23811 23191 21680 23313 22488 22007 23258 23673 22653 22656 23129 22352 22718 22936 23291 22445 23185 22642 22676 23023 23250 22372 23253 22553 22849 22600 23456 22340 23154 22823 22948 22230 23569 22811 22880 22683 23186 22305 23337 22973 23004 22333 23427 22409 22928 22962 23130 22357 23337 22131 23309 22799 23110 22306 23392 22240 22915 22856 23380 22136 23397 22056 22994 22885 23176 22418 23456 22127 23341 22771 23012 22533 23076 22070 23506 22481 23015 22501 22531 22045 23657 22304 22973 22588 23144 22057 23464 22839 22834 22775 23081 22080 23499 22684 22698 22622 23158 22405 23140 22933 22861 22604 23241 22471 22844 23111 23168 21989 23385 22321 22074 23467 23943 21643 22741 22663 22400 21985 24120 22070 22361 23044 21952 21830 23753 23185 21783 23145 22793 22093 22775 23923 22541 22085 23380 22659 22521 23496 22626 22775 22816 23034 22540 23000 23157 22902 22550 23115 22708 22698 23049 23279 22205 23223 22624 23111 22479 23641 22421 22908 22612 23046 22345 23760 22378 23037 22520 23200 22279 23648 22512 22967 22588 23204 22128 23656 22395 23021 22531 23232 21944 23522 22807 23064 22409 23264 22427 22967 22845 23280 22163 23498 22261 22897 22759 23623 22087 23385 22408 22855 22500 23692 22076 23173 22349 23382 22304 23650 22582 23012 22624 23168 22069 23352 22912 22754 22493 23136 22272 23328 22944 22797 22720 23098 22031 22660 22985 23241 22162 23369 22530 22547 23040 23488 21897 23307 22448 22101 22852 24096 21845 22351 23052 22857 21633 23828 23163 21847 23127 22608 21805 23152 23911 22329 22284 23320 22535 21888 23068 23907 21811 22774 22976 22361 23160 23068 22848 22611 23179 22503 22886 23168 22753 22798 23127 22452 22917 22985 22872 22501 23252 22481 22976 23019 23005 22490 23132 22321 23063 22984 23220 22169 23427 22240 22823 22786 23415 22011 23577 22322 22922 22656 23516 22085 23306 22384 12018 17046 20083 19041 20484 19754 20593 20381 21495 43460 28388 24651 24660 23018 24280 22931 23445 22973 23377 22560 23921 22844 23226 22902 23505 22081 23456 17375 20634 20190 21888 20772 21413 21480 22258 20903 37499 25528 24359 23128 24167 23092 23209 23034 23367 22505 23482 23268 23231 22699 23452 22294 22740 3072 19881 20231 22092 21219 21165 22313 23194 21042 21959 29360 24407 22859 24672 23174 22350 23525 22920 21979 23808 23761 22092 23286 22849 21888 23545 23784 14435 21187 21907 22119 21780 22928 21997 22424 22388 22530 25172 23651 23585 23268 22759 23463 22727 22825 22969 23692 22432 23175 22842 23280 22337 23317 23197 20761 21781 22977 22102 22617 22295 23415 22064 22893 22457 23718 22369 23749 22904 23116 22720 23408 22274 23328 22912 23245 22336 23503 22361 22976 22780 23660 22236 23134 22596 23113 21979 23462 22726 22958 22568 23261 22308 23188 22848 23258 22376 23432 22613 22967 22696 23782 22144 23420 22223 22949 22497 23696 22133 23364 22589 23048 22165 23576 22512 22771 22508 23154 22367 22934 22997 23096 22359 23374 22928 22905 23015 23091 22288 23321 22447 22473 22956 23567 21892 23512 22440 22072 23376 23485 21671 23409 22705 22060 23405 23913 21766 23192 22961 22480 22308 24158 22056 22421 23031 22583 22144 23861 23188 21827 23226 22601 21909 23189 23248 22292 23311 22427 22657 23017 23432 22486 23041 22593 22694 22650 23446 22528 23097 22748 22889 22644 23546 22381 22714 22658 23256 22279 23686 22354 22880 22554 22424 22156 23622 22379 23019 22702 23088 22272 23153 22914 22992 22372 23254 22333 23168 22696 23184 22260 23225 22586 22852 22829 23180 22341 23399 22301 22780 22811 23311 21997 23400 22200 22812 22704 23393 22236 23456 22381 22711 22881 23152 22359 23368 22299 23264 22861 23012 22496 23377 22232 22912 22862 23045 22247 23228 22336 23198 22984 22754 22595 23148 22317 23157 22857 22876 22740 22336 22250 23521 22569 23027 22582 22671 22134 24101 22047 22886 22471 22048 23256 23137 22036 23113 22012 23192 23398 21870 23142 22504 22048 23700 22848 21993 23072 22481 22072 24008 22139 22730 22704 22164 23044 23127 22656 22747 23081 22328 23478 22540 22913 22674 22856 22850 23160 22349 23248 21774 22770 23114 22917 22712 22960 22096 23368 22716 22902 22588 23008 22504 23552 21924 23331 22855 22862 22789 22800 22634 23143 22356 23610 21957 23488 22252 23203 22771 22977 22501 22873 22066 23583 22250 23220 22403 22784 22898 23008 22551 23145 22181 23665 22056 23487 22327 23008 22744 22829 22515 23072 22198 23736 22029 23462 22245 23012 22775 22901 22498 23083 22128 23626 22084 23315 22602 23159 22745 22912 22464 22691 22986 22833 22648 22901 22328 23438 22167 23220 21783 23045 22971 22742 22674 22610 23031 22929 22581 22617 21974 23812 21635 23023 21874 23444 22409 23200 21856 22404 23416 22277 22564 21889 23839 21845 23141 22481 23109 22606 22861 22569 22307 23460 22093 22720 22454 23073 22684 22638 22726 23147 22576 22822 22784 23053 22712 22894 22807 22755 23152 22592 22907 22325 23562 22176 23191 22227 23456 22215 23312 22230 23350 22135 23301 33 17789 18503 19990 18970 20786 19609 20650 19904 21353 32689 26125 23735 24472 23008 23750 16999 21321 20557 21696 21095 22197 21405 22157 21623 36374 25365 24176 23128 24224 22761 17653 20503 22272 21573 21952 21856 22343 22102 22520 22281 25856 23481 23702 23207 23476 15365 21707 22112 22211 22035 22276 22457 22387 22021 22432 25722 23849 22967 23079 23136 23291 21421 22697 22320 22997 22146 23008 22333 23137 22315 26192 22838 23790 22203 24206 21997 23279 21814 24263 22240 22786 22229 24036 22432 22604 23017 22952 23275 22511 23982 21946 22948 22282 23571 22680 22492 23269 22433 23106 22429 22901 22978 23073 22711 22946 22924 22903 23155 23178 22753 22729 22692 23006 23075 22862 22909 22756 23271 22460 23584 22216 23065 22376 23434 22669 23559 22840 23028 22680 22897 23064 22880 22481 23027 22778 23064 22337 23221 22645 23310 22467 23048 22592 23366 22272 23511 22176 23392 21952 23844 22101 23333 22445 23047 22556 22724 22892 22867 22439 23052 22468 23438 22240 23717 22007 23236 22200 23313 22625 22968 22874 23064 22312 23232 22318 23369 22109 23819 22228 23301 22412 23104 22530 22902 
21923 21441 21504 21961 21945 21200 21987 21275 21573 21734 22179 21004 22023 21464 21897 21271 22330 21342 21678 21559 21623 21184 22306 21456 21667 21517 21719 21079 22410 21669 21737 21622 22009 21290 22645 21437 22123 22088 21977 20848 20984 20752 20999 21060 21831 22092 22754 22775 23132 22800 22775 21378 21137 20805 21136 21306 21703 21150 21680 22033 21706 22224 21949 22247 22134 22280 21980 22051 21645 21987 21715 22231 22105 22326 22231 22753 22250 22604 22183 22493 21772 21962 21440 21796 21813 22428 21792 22367 21780 22480 21886 22541 21994 22456 21920 22504 21849 22455 21639 22235 21461 22225 21330 22280 21365 22339 21523 22378 21696 22413 21751 22493 21904 22885 22167 23033 22128 22857 22189 22865 22112 22998 22097 22785 22147 22821 22156 22736 21856 22712 21629 22247 21525 22293 21436 22276 21395 22218 21345 22036 21337 22106 21435 22176 21481 21888 21392 22087 21500 21997 21453 22038 21385 22089 21448 22233 21805 22434 21520 22365 21811 22299 21931 22561 22208 22800 22404 22814 22344 22645 22379 22645 21808 21748 21217 21576 21257 21466 21127 21409 20952 21268 21071 21278 47 47 1181 3815 5799 7530 8352 9216 10477 10799 38309 30503 27418 25218 24609 23706 23667 23201 23254 22988 23119 22856 22971 22629 22897 22661 23066 22641 23015 22512 23028 22528 22932 22558 22993 22489 22979 22410 23100 22391 23059 22425 22865 22279 22996 22304 22800 22266 22843 22167 23027 22241 22941 22251 23049 22264 22915 22078 22761 22112 22720 22007 22704 22109 22759 21921 22617 21786 22443 21627 22311 21479 22255 21433 22215 21643 22221 21670 22384 21733 22499 21807 22839 22058 22791 22034 22819 22029 22706 22022 22638 21988 22711 22067 22627 22036 22645 22007 22492 21906 22590 22049 21455 21319 21559 21185 21615 21185 21459 21173 21539 21251 21533 21292 21385 21126 21731 20757 20998 21115 21129 20984 20963 20907 20775 20850 20992 20632 20768 20481 20647 20530 20910 20870 21143 21423 22026 22213 22448 22520 22720 22584 22613 22437 21566 21761 21277 21525 20899 21380 21155 21451 21361 21693 21426 21748 21485 21752 21401 21651 21422 21659 21248 21652 21155 21418 20983 21446 20933 21349 20774 21398 21040 21633 21474 22189 21619 22091 21800 22056 21662 22132 21310 21765 21057 21408 20985 21663 21184 21959 21276 13559 15624 17553 17568 18468 18105 18811 18579 19766 19234 27573 24285 23413 22177 22376 21645 22445 21800 22288 21399 21724 21392 21510 21532 22449 21917 22016 21056 21782 21293 22101 21286 21708 20901 21476 21573 22257 21678 21547 21006 21780 21463 21584 21115 21417 21754 22191 21355 21319 21505 21894 21368 21531 21019 21973 22007 21672 20960 21848 21600 21948 20551 21519 22558 22521 20609 21203 21819 21784 21108 20663 21600 22837 21629 20631 21313 22039 21248 20722 20857 22415 22506 20856 21185 21997 21220 20637 20967 22640 22503 21131 21640 21538 21815 21335 21383 21345 22021 21341 21317 21495 21709 21235 21228 21627 21968 21130 21653 21512 21675 21255 21510 21673 21980 21155 21734 21368 21671 20837 21913 21790 21543 21243 21888 21184 21393 21319 22312 21088 21689 21478 21760 21095 21587 21628 21991 20880 21949 21321 21596 21047 22232 21796 21671 21065 21997 21085 21573 21181 22184 21260 21380 21385 21806 21118 21394 21445 22187 21064 21801 21255 21659 20816 22099 21568 21619 21043 22042 21187 21593 21132 22180 21605 21396 21139 21828 21324 21417 21336 22278 21616 21334 21383 21793 21194 21509 21084 21973 21674 21415 20965 21878 18442 19396 18944 20999 21069 19777 19691 21000 20643 20296 22138 22337 22999 22730 20986 21354 22133 21651 21128 21003 22048 22831 22040 20699 20966 22084 21417 21096 20688 21715 22681 21995 21363 21297 22006 21312 21777 20969 21809 21914 21771 21070 21560 21677 21513 21200 21354 21516 22086 21521 21472 21205 22025 21254 21523 20945 21661 21770 22091 21107 21479 21466 21860 21195 21538 21101 22008 21683 21576 21125 21988 21247 21595 20881 22143 21652 21877 20836 21832 21380 21868 21111 21419 21045 22119 21600 21687 20996 22071 21260 21667 21025 21701 21629 22112 21218 21432 21254 22017 21179 21577 20983 22121 21647 21765 20839 21923 21479 21799 21271 21547 21226 22087 21735 21539 21099 21736 21266 21526 20887 21860 21831 22047 20984 21467 21444 21815 21160 21526 21161 22058 21881 21673 20870 21436 21706 21740 21089 20832 21177 22656 22475 21292 20480 21783 21825 21346 20770 21259 22449 22369 20841 20824 21740 22010 21348 21256 20453 21534 22582 22291 20747 20821 21624 21806 21521 21184 21424 21595 22152 21455 21383 21242 21788 21383 21628 20948 21908 21796 21701 21087 21625 21532 21588 21361 21370 21585 22069 21731 21475 21152 18638 19776 20629 19930 20959 20912 21288 20189 20803 20695 23265 21783 21989 21200 22326 21687 21805 20886 22024 21216 21631 21145 21409 21666 22183 21206 21525 21421 21733 21621 21463 21226 22379 21347 21571 21257 21942 21209 21619 20900 21912 21792 21808 20996 21890 21180 21889 20771 22080 21612 22099 20887 21715 21467 21616 21134 21481 21774 22129 21070 21539 21492 21687 21281 21435 21791 22180 21550 21312 21348 21773 21272 21575 20947 22059 21959 21154 21035 21982 21429 21277 20720 22540 22613 21705 20456 21816 21736 20549 20550 21499 22558 22410 20760 21281 22088 21401 20915 21000 22243 22729 21572 20552 21677 21927 21388 20855 22144 21774 21549 21132 21884 21377 21757 21022 22049 21873 21351 21245 21911 21276 21652 21117 22083 21639 21728 21040 21985 21249 21449 21137 22176 21512 21488 21440 21824 21168 21466 21568 22076 20918 21691 21395 21761 20968 21627 21741 21824 21039 22064 21145 21568 21104 22328 21257 21530 21500 21651 20971 21792 21707 21659 21086 22049 21153 21449 21095 22339 21421 21502 21377 21958 21234 21406 21204 22308 21529 21496 21328 21836 21198 21569 21669 22044 20842 21938 21361 21558 21038 21879 21809 21463 20104 21191 20696 21040 21074 21685 20750 21099 21111 23366 21750 21701 21956 21793 21076 21929 21390 21095 21316 22759 21609 20873 21903 21419 20896 21041 22624 22010 20569 22025 21428 21244 21049 22835 21853 20647 21788 21751 20975 21353 22757 22483 20627 21733 21666 21323 20854 21895 21763 21110 22021 21300 21640 21270 22090 21516 21330 21494 21809 21415 21280 21620 22196 21158 21715 21516 21771 20955 22168 21639 21417 21521 21709 21159 21744 21752 21804 21112 22028 21681 21500 21779 22035 20982 22029 21272 21749 21228 22336 21396 21731 21544 21870 21027 22087 21900 21925 21443 22177 21414 21735 21464 22516 21318 21895 21478 21856 21067 22448 21682 21783 21605 21829 21013 22128 21831 22009 21184 22223 21536 21608 21777 22010 21143 22178 21485 21533 21853 22250 21217 22037 21469 21703 21191 22309 21529 21642 21707 21716 21169 22095 21808 21463 21579 21881 21252 21613 22417 21479 21416 21893 20902 22004 22563 20829 21703 21787 21228 21152 22761 21708 21154 22352 21197 21146 22808 21334 21652 22009 21072 21745 22799 20899 22165 21584 20829 22200 22013 21415 22003 21413 21760 22144 21827 21623 22061 21104 21526 21991 22061 21444 22133 22036 21617 21984 22118 21322 22253 21641 21645 21746 22378 21263 22150 21419 21772 21684 22503 21302 22019 21721 22007 21364 22647 21540 22024 21729 22097 21235 22408 21985 21920 21580 22109 21463 22181 22023 22007 21308 22288 21798 21920 21712 22427 21276 22295 21488 21950 21490 22523 21360 22099 21617 21985 21294 22533 21881 21809 21632 22061 21413 21960 22076 21955 21353 22154 21524 21670 21865 22400 21260 22045 21701 21720 21517 22387 21505 22032 21556 21963 21462 22448 21536 21666 21882 21793 21106 22990 21772 21216 22064 21491 20931 22984 21800 21002 21905 21947 21127 21799 22924 21219 21440 22181 21308 21223 22765 22006 20817 22180 21426 21065 21996 22045 21572 21590 21958 21307 21977 22041 21673 21489 21973 21581 21481 21987 22132 21291 22093 21557 21696 21885 22180 21207 22003 21469 21718 21926 22436 21352 21890 21680 21910 21202 22364 21547 21713 21788 22009 21016 22502 21580 21767 21689 22125 21248 21868 21985 22064 21255 22099 21537 21780 21865 22277 21093 22146 21344 21816 21389 22585 21623 21637 21681 21861 21160 22264 21819 21644 21522 22066 21131 22006 21848 21739 21583 21894 21176 22080 22075 21614 21749 21856 21439 22065 22016 21609 21656 21945 21438 22063 22096 21719 21615 21979 21479 21512 22182 22123 21083 22106 21536 21056 22551 22144 20752 22291 21748 21144 21792 10821 12063 14487 14829 14424 15993 16481 14809 16544 37018 28818 26001 26190 23568 23176 23536 22646 22203 23343 21889 21377 22089 21511 21611 22011 22024 9019 10853 14640 16743 16739 19696 19047 18999 19223 19419 28781 26019 24193 23356 22743 22967 22775 22323 22396 22848 21036 21980 21313 21753 21268 22313 21284 17228 18622 19899 19537 20995 19896 20496 20246 20787 19959 24514 23035 22408 21815 22299 21635 21750 21894 22092 21205 22160 21353 21563 21751 21987 21015 22021 18889 20224 20395 21253 20247 21118 20562 21021 20167 21453 22852 22099 21600 22128 21288 21751 21952 21976 21193 21957 21253 21625 21400 22333 21376 21447 21616 20793 20736 20891 21303 21741 20737 21469 21001 21211 22855 22720 21966 21105 21769 21648 20621 21934 22621 20923 21152 21973 21216 21095 22559 22042 20724 22120 21477 21071 21136 22850 22045 20673 21874 21509 20827 21781 22633 21027 21314 21977 21516 21299 22339 21607 21533 21581 21720 21207 22104 21765 21369 21680 21764 21174 21862 21947 21672 21340 21927 21369 21573 21547 22213 21302 21825 21415 21866 21369 22309 21304 21836 21380 21698 21249 22391 21460 21687 21610 22295 21095 22420 21490 21782 21534 22034 21038 22516 21317 21696 21664 21853 21146 22003 21803 21840 21619 21984 21236 22033 21871 21726 21341 22359 21693 21712 21933 21972 21248 22048 20809 21568 21978 22189 21081 22107 21321 21663 21742 22375 21161 22039 21468 21715 21637 22306 21305 22253 22148 23077 21719 22854 21659 22349 21927 22319 22064 23351 21617 22460 22355 22085 21567 22780 23095 21543 22174 22370 21569 22144 23461 21345 21892 22658 21267 22016 23543 21925 21383 22497 21829 21542 23216 21831 21351 22401 21536 21437 23060 22339 21288 22736 21690 21271 22722 21943 22178 21874 22031 21969 22816 21660 22300 21800 21764 21911 22546 21652 22168 21867 21989 21823 22854 21591 22534 21849 22039 22263 22819 21533 22471 21715 22123 22210 22201 21808 22323 21613 22401 22155 22044 21860 22325 21335 22570 21765 22003 21714 22284 21817 22593 21343 22437 21892 21964 22275 22177 21559 22398 21493 22279 22077 21942 21716 22284 21380 22429 21922 21896 21990 22113 21767 22769 21575 22360 21785 22217 21873 22643 21300 22417 21713 21997 22156 21961 21893 22054 21392 22478 21659 21842 21989 22214 21774 22534 21491 22275 21744 21840 22298 21825 22024 22107 21171 23098 21401 22328 21750 21308 22893 21355 22186 21863 21009 23341 21809 21965 22063 21063 22579 22148 21516 21960 21056 23031 21343 22363 21810 21218 22952 21728 21989 21877 21131 22191 22057 21985 22157 21632 22473 21657 22184 21809 21854 22301 21842 22044 21970 21510 22531 21485 22273 21764 22215 21944 22023 21760 21787 22198 21871 21947 22080 21319 22677 21442 22487 21914 22217 22016 21931 21555 21897 22084 22070 21878 22193 22017 22622 21492 22359 21305 22800 21361 22391 21542 22583 21805 22544 21672 22400 22024 22005 21693 21869 21991 21881 21776 22251 22165 22036 21879 22044 21709 22403 21793 22183 21490 22503 21657 22136 21188 22760 21116 22057 21512 22304 21353 22262 21670 22089 22137 22373 21756 22199 22195 22217 21804 21863 55 7343 10262 18824 18624 18563 18257 19115 17221 17335 35023 29442 24438 24621 22356 24044 7883 14608 15283 17904 16515 18209 16736 19258 16979 41349 28457 27111 23273 24134 22308 11362 15079 18552 17885 20416 18917 19529 19609 19937 41667 28638 24978 24192 23232 22807 11578 17989 19612 19984 20709 20482 21003 20683 21377 20498 23868 22058 22521 21679 22816 19591 21504 20620 21616 20736 22080 20823 21597 20804 22071 22793 22528 21792 22420 21466 21463 21735 21906 21632 21906 21764 21900 21558 21478 21725 21552 21341 21537 21595 21816 20676 22156 20989 22055 20957 22304 21064 21806 20823 22278 20986 21884 20906 22177 21124 21764 21111 22275 21276 22245 21381 21637 21385 21483 21729 21521 21331 21420 21771 21644 21662 21965 21193 21962 20955 22167 21207 21734 21103 22056 21550 21917 21735 21526 21596 21585 21768 21520 21528 21290 21962 21075 21699 20815 22519 20971 21468 21552 21756 21900 20959 22795 20537 21620 21171 21933 21528 21504 22498 20829 21839 20873 22336 21384 20917 22503 20711 21893 20877 22503 21676 21437 22592 20829 21842 21197 21864 21612 21627 21931 21317 21497 21521 21536 
21960 21937 21839 21639 22187 21384 21690 21979 22084 21339 22129 21453 21588 21824 22486 21216 22126 21576 21909 21603 22497 21329 22133 21760 21799 21359 22630 21351 21896 21796 21737 21113 22984 21108 21780 21920 21158 22021 23016 21173 21488 22051 21637 21475 23029 21042 21894 21683 21163 21981 22907 20692 22320 21467 20995 22671 21862 21304 21955 21045 21976 22002 21485 22009 21799 21805 22252 21495 21987 21705 21445 22211 21791 21542 21835 22136 21533 21760 21269 21582 21224 21837 21510 22149 22037 22440 21910 22222 21716 21792 21334 21745 20965 21408 20721 21152 20926 21373 21280 21633 21185 21776 21425 21682 21536 21917 21830 22182 21895 22237 22018 22396 22183 22345 21868 21893 21494 21516 21147 21445 21033 21209 20749 20837 20804 21159 21543 21273 21455 21276 21650 21593 21659 21597 21735 21568 21736 21576 21888 21691 21957 21547 22008 21880 22144 21665 22003 21755 22097 21812 22034 21749 21985 21633 22249 22024 22337 22027 22377 22123 22356 22000 22250 21671 21952 21354 21749 21271 21559 21171 21709 21082 21792 21461 21910 21360 21904 21751 21600 21798 21872 21456 21926 21419 13475 16880 19080 18917 19855 19648 20313 19788 20429 40913 25600 23073 22839 22103 22496 21684 22323 21933 22328 21705 22280 21896 22295 21943 22225 21747 22248 21760 22256 21749 22109 21826 22135 21612 22077 21670 22119 21653 22073 21681 22208 21739 22199 21719 22089 21933 22352 21972 22312 22192 22272 22007 22289 22155 22350 22278 22529 22165 22466 22199 22423 22245 22525 22204 22409 22307 22281 21906 21808 21543 21789 21557 21713 21383 21593 21607 21677 21776 21671 21915 21536 21607 21400 21458 21443 21461 21581 21408 21317 21399 21431 21632 21512 21760 21522 21777 21657 21979 21809 22123 21453 21807 21682 22084 21765 22138 21864 22340 22016 22337 22043 22509 22024 22348 21980 22536 22040 22492 21943 22483 21980 22428 21947 22425 21822 22372 21918 22257 21782 22058 21453 21926 21351 21815 21169 21777 21254 21888 21397 21943 21680 22124 21687 22400 21728 22119 21579 22032 21365 22325 21512 21966 21212 21688 21172 21762 21268 21896 21473 22113 21732 22377 21972 22392 22048 22301 21896 22294 21760 22034 21677 21957 21419 21682 21281 21833 21459 22057 21690 22093 21692 22340 21900 22208 21783 21757 21158 21568 20876 21106 21125 6575 17973 20812 21351 21888 21286 20775 19893 20312 20619 28145 23937 23009 22088 21837 21264 21100 20840 21956 22757 23025 22326 21584 21597 21560 22085 21862 21863 21784 21504 21540 22128 22163 21937 21488 21604 21808 22051 21633 22253 21444 21984 22075 22235 21578 21745 21751 22112 21584 21632 21448 22277 21948 21731 21341 22085 21545 21647 21173 22178 22018 22010 21098 22077 21777 21969 21326 21738 21695 22505 21531 21637 21711 22092 21634 21797 21677 22528 21613 21777 21309 22301 21493 21760 21546 22518 21645 21664 21514 22247 21577 21871 21068 22408 21911 21924 21208 22171 21481 21640 21134 22451 21888 21842 21404 22177 21417 21770 21238 22247 21952 21719 21374 22064 21433 21629 21690 22587 21602 21715 21828 21984 21445 21772 22108 22147 21048 22304 21843 21638 20809 22544 22528 21068 21470 22519 21381 21062 22212 22828 20967 20999 22043 21985 21093 21304 22683 22572 20745 22063 22131 22080 20770 22537 22960 21829 20824 21945 21698 21312 22076 22197 21803 21591 22128 21648 21607 21344 22233 22012 21456 21673 22082 21508 21853 21428 22221 21861 21582 21678 22101 21495 21622 21437 22468 21859 21797 21424 22252 21543 22087 21304 18428 20592 20920 20905 21544 21047 21474 20956 21760 33389 24101 21816 22281 21825 22016 21392 21687 21975 22361 21340 21810 21635 22252 21474 21936 21232 22479 21834 21935 21154 22297 21625 21888 21549 21682 21934 22396 21399 21780 21709 22098 21397 21866 21257 22511 21923 22057 21206 22180 21772 21897 21335 21703 21918 22440 21696 21664 21600 22325 21613 21939 21306 22118 22029 22249 21328 21803 21895 21977 21431 21158 22224 23025 21304 20924 21639 22193 21308 21327 20710 21933 22762 22471 20956 21337 22187 21967 21382 20972 21937 23026 22221 21047 21303 22464 21981 21479 21068 21664 22293 21962 21655 21492 22096 21817 21819 21373 21753 22113 22296 21856 21512 21785 22150 21556 21768 21504 22237 22034 21896 21341 21941 21824 21863 21751 21646 21638 22441 21949 21736 21431 22188 21594 21845 21293 21744 22003 22452 21581 21696 21571 22247 21480 22132 21141 22022 22012 22240 21163 21976 21714 21886 21450 21734 21257 22401 21943 22016 21143 22141 21705 21946 21408 21696 21618 22449 21922 21760 21266 22436 21593 21995 21341 21913 21930 22403 21481 21753 21793 22156 21390 21852 21421 22311 22028 21950 21257 21952 21779 21894 21472 15616 20673 21855 21179 21452 21520 22084 21385 21781 20842 24451 23234 22908 21046 21421 22108 22127 21069 21041 22058 23136 22553 21448 20867 22414 21859 21676 20883 22474 22824 21927 20594 22021 22192 21603 21067 21513 22281 23138 22076 21376 21988 21824 21800 21370 21969 22099 22008 21504 22060 21911 21763 21474 21689 22161 22105 21393 21888 21856 21863 21516 21751 22005 22234 21488 21713 21833 22145 21500 21712 21593 22391 21880 21813 21455 22267 21461 21853 21367 22330 21825 21809 21495 22224 21609 22400 21163 22157 22016 22132 21244 22022 21798 21973 21312 21832 21955 22393 21171 21963 21701 22105 20714 21741 21741 22391 21514 21837 21752 21970 21315 21922 21803 22436 21242 22053 21636 22008 21312 21856 21981 22316 21348 21830 21836 22028 21392 21779 21888 22259 21303 22016 21776 21911 21189 22292 21940 21792 21324 22181 21580 21766 21033 22861 22208 21130 21600 22134 21455 21175 22291 22528 20737 22060 21976 21232 20903 23023 22135 20885 21743 21900 21253 21256 22677 22467 20775 21733 22008 20897 21029 21482 22547 21981 21523 21648 22060 21856 21483 21927 22237 21594 21777 21991 21744 21326 22082 22107 21925 21481 22145 21634 20832 21277 22253 21688 21494 21669 21782 21492 21553 25372 22692 21408 22067 21621 21890 21360 22400 21751 21736 21716 22070 21532 21895 21984 22416 21232 22141 21609 22317 21208 22396 21897 21690 21667 22141 21088 21682 21774 22357 21084 22190 21700 21880 21117 22369 21880 21693 21618 22053 21276 21864 21954 22418 21159 22163 21635 21878 21136 22188 21984 21904 21253 22157 21421 21803 21811 22461 21380 22055 21817 21904 21157 22351 21930 21687 21832 21957 21443 22043 22155 21730 21504 22311 21345 21088 22224 22727 20700 21832 21986 21632 21062 23175 21703 20976 22021 21928 21088 21745 22647 22539 20681 22240 21617 21308 21588 23086 21224 21381 22090 21642 20904 22177 21993 21469 22088 21843 21696 21741 22246 21521 21848 21920 21831 21664 22297 21633 21698 21793 21749 21383 22289 21941 21633 21784 21986 21583 21738 22027 22008 21472 22221 21526 21682 22105 22305 21220 22205 21563 21593 21857 22272 21225 22218 21491 21748 21880 22432 21292 22040 21495 21927 21642 22382 21211 22272 21441 21792 21963 22282 21169 22329 21400 21760 22005 21991 21405 21993 21460 22056 21869 21707 21529 21896 21293 22337 21968 21975 21426 22136 21345 21788 22021 21780 21494 22087 21648 21942 22106 22121 21253 22287 21446 21666 22005 22135 21275 22245 21560 21665 21699 22911 21048 22089 21871 21719 20889 22965 21978 20885 22232 21690 20856 22664 22493 20816 21876 21943 21120 21785 22813 21232 20886 22465 21349 21088 22222 22771 20759 22201 21770 21400 21996 22066 21680 21500 22072 21607 21404 22119 22186 21427 22000 21709 21774 21645 22375 21771 21661 21911 21847 21283 22144 21871 21632 21888 21857 21304 22233 21992 21617 21814 22064 21372 21957 21987 21649 21765 22089 21413 22126 21953 21830 21529 22049 21579 21671 21883 22240 21250 22125 21599 21721 21723 22380 21198 22170 21587 21920 21257 22573 21556 21805 21789 21939 21241 22438 21792 21760 21747 22063 21381 21904 21959 21969 21594 22211 21497 21744 22043 21965 21325 22199 21853 21647 21959 21930 21364 22208 21597 21953 21724 22433 21333 21888 21614 21722 21180 22957 21356 21468 22167 21320 20887 22642 22631 21049 21641 22113 21264 21645 22894 21449 21233 22331 20601 21047 22404 22626 20572 22181 22146 21704 20903 22866 22000 21496 22044 21611 21607 22046 22145 21425 22046 21708 21541 22165 21980 21413 22158 21557 21550 22160 22194 21288 22177 21696 21576 21979 22202 21217 22086 21607 21728 21499 22420 21319 21977 21593 21816 21432 22489 21440 22005 21641 21942 21368 22484 21657 21682 16320 19181 18935 20465 19946 20231 20327 20967 20059 32977 24477 22707 22183 22260 21490 22255 21859 21733 21688 22157 21426 22017 22086 22016 21381 22259 6091 19001 20251 21507 20424 21121 20954 21381 20707 21792 27586 23315 22485 22180 21593 22129 22048 22010 21363 22171 21448 21656 21934 22292 21100 22189 21645 14396 19847 21998 20384 21607 21402 21401 20407 22509 21848 24075 22855 22098 21048 22036 22772 21136 21547 22236 21287 21431 22855 21521 21240 22317 21465 21241 19619 21005 20875 21657 21563 21109 21896 21869 21570 35143 23445 21945 21782 22039 22327 21536 21848 21825 22172 21428 22372 21928 21693 21804 21904 21676 21563 20816 21987 21237 21799 21605 21825 21092 22317 21760 25168 22073 22130 21528 21812 21986 21991 21364 22240 21442 21906 21761 22504 21213 21993 21699 21943 21254 22385 21857 21704 21640 22276 20839 21819 21910 22227 21137 22337 21360 21751 21768 22316 21200 21952 21529 22372 21248 22477 21392 21793 21659 22097 21207 22488 21713 21712 21747 22037 21387 22240 22073 22152 21285 22340 21499 21656 21838 22316 21237 22221 21453 21635 21799 22400 21179 22117 21733 21591 21258 22954 21218 21576 21899 21653 21403 22953 20767 22025 21708 21632 20992 22921 21861 20835 22048 21655 20852 22672 22402 20928 22071 21734 21239 21605 22835 21282 21346 22067 21728 21671 22259 21464 21932 21832 22146 21426 22221 21867 21377 21881 21640 21295 22120 21817 21575 21961 21913 21417 22017 21875 21575 21856 21856 21389 22256 21870 21578 21788 21942 21356 22153 21991 21672 21415 22076 21481 21699 21927 22213 21233 22355 21427 21635 21809 22102 21223 22096 21554 21765 21798 22394 21228 22141 21622 21827 21627 22426 21137 21975 21619 21936 21539 22397 21240 22162 21444 21689 21846 22405 21174 22306 21440 21669 21992 22085 21140 22139 21325 21664 21832 22368 21194 22232 21442 21584 21937 22099 21304 22135 21539 21687 22037 21653 21756 21838 21231 22200 22023 21509 21941 21861 20804 22759 21802 21258 22023 21500 21920 22621 20672 22554 21112 21432 22865 21079 21979 21841 21319 21818 22733 20757 22076 21623 20922 22843 22016 20997 22261 21224 21552 22090 21528 21904 21805 21454 22099 21933 21565 21956 21479 21659 22220 21490 22005 21640 21498 22036 21864 21504 21929 21576 21903 22060 21672 21929 21857 21400 22426 21315 22165 21512 21626 21926 21777 21711 21948 21281 22407 21392 22219 21457 21725 21905 21757 21765 21949 21162 22274 21518 21799 21520 21732 21968 22048 21683 21978 21305 22455 21449 22098 21499 21655 21915 21792 21643 21904 21180 22561 21197 22227 21390 21704 21847 21735 21585 22009 21197 22405 21243 22212 21659 21968 21909 21732 21667 21638 21927 21975 21625 21891 21138 22453 21296 22208 21504 21804 22237 21570 21839 21532 22133 21661 21863 21763 21219 22816 20739 22444 21183 22713 21166 22174 21252 21653 22373 21214 21874 20931 22836 20839 22195 21609 22251 21476 21974 21547 21612 22430 21392 21752 21515 22085 21584 21764 21462 22176 21469 21880 21603 22250 21685 21991 22153 21824 21972 21734 21815 21415 22391 21292 22089 21373 22465 21285 22081 21336 22410 21360 12647 18290 20416 19125 20288 19717 20807 20311 20690 20564 26880 23268 22612 21844 22372 6912 19227 20121 21340 20885 21317 21127 21456 21326 21411 27504 23475 22324 22223 21641 22163 18752 20295 21149 21542 21475 21574 21712 21400 21504 29328 23385 22340 21936 22036 22025 18581 20718 21306 21628 21539 21406 21540 21698 21737 21251 23591 22166 22122 21573 21833 18385 21444 21266 21987 21358 22166 21522 22210 21284 22183 22615 22918 21128 22363 20784 22951 21065 21913 21136 22394 21632 21559 21661 22185 22045 21492 22500 20996 22153 21113 22736 21208 21414 21966 21657 22428 21421 22956 21360 22218 21404 22336 21465 22045 21901 22180 21561 21784 21616 22020 21689 21606 21868 21631 21964 21820 22135 21321 22068 21413 22216 21493 21888 21568 21763 21917 21813 22080 21584 21816 21556 22055 21931 21463 22000 21735 21987 21569 22228 21712 21957 21486 22202 21504 22089 21504 22468 21239 22042 21184 22191 21737 21763 21967 21577 21543 21621 21952 22034 21495 22263 21301 22152 21251 22325 21448 21265 21810 21785 21728 21753 21841 22131 21372 22285 21112 22157 21191 22244 21576 21917 21800 21685 21508 
37760 37768 36944 34496 40472 41751 35289 38330 39309 41536 40023 42772 34073 36184 43528 40240 40104 33808 37351 34070 43420 41424 40163 35692 36256 41698 34994 41495 37369 36135 35629 38956 38668 38986 35947 37399 39457 38688 39104 39792 42817 39211 34508 42579 39525 38201 37276 35015 39521 38528 38089 34405 41460 43026 37845 35383 36970 40810 38160 38301 38218 38552 43040 38983 36380 36371 41232 43300 38663 35362 42324 40979 36515 33272 36583 35935 37957 39261 42250 39904 42901 37120 38749 33612 36752 38091 40868 42264 37796 36728 34758 36700 35119 42194 40640 39634 33561 34325 37268 40529 41064 40012 32992 39757 38328 34520 35124 38752 40273 43382 36201 36143 40785 42247 37293 37232 42950 33220 39220 42476 38297 40089 35136 35912 35428 39468 33526 40386 42885 40853 34640 33869 34629 34016 35608 33363 35414 33570 36850 35194 37958 33520 38435 37218 39774 34800 38512 36082 39376 36416 38621 35922 38247 34289 41088 38699 41960 38978 42567 40176 42266 38594 41275 35106 37667 41516 36025 40568 33809 39456 35520 38600 36034 42528 37696 41448 37389 35941 33894 36001 36906 42325 37892 42272 29952 34160 37552 36167 36224 33603 40823 35545 42184 47141 35731 39439 37260 39699 43620 35223 41748 38070 41861 35474 41135 37365 41608 38163 40871 35968 41048 35704 41031 36008 39714 36544 40045 34363 39271 34902 39752 34720 39136 34962 40400 35929 40666 35684 39344 37952 42004 38330 41671 40560 41153 38912 41380 40359 42381 41508 33544 40049 43361 41015 43149 41464 44386 41046 42887 41927 41577 37523 36200 33468 36064 33488 35118 41682 34198 34125 34885 35639 34839 37526 33040 34050 41626 42681 42630 42885 34183 41641 41289 42187 42614 34376 32644 35315 32803 35648 34569 38272 36311 39895 42721 36760 34848 39123 35873 39949 37049 41911 38528 41952 39168 44072 38835 42212 38550 33508 38574 43736 38265 43600 38621 43009 38304 42961 36908 42310 37897 41280 36215 39027 42717 37918 41619 36749 39494 35968 40225 37141 41837 38163 34801 39732 35250 42253 35595 39813 34007 38400 41728 42027 33037 38066 40137 35115 39449 35744 40320 37315 42633 39847 35627 42402 38346 42628 38981 41785 37409 41493 35748 38594 35104 37952 42276 35108 40454 36769 42533 39280 35179 39465 35224 41816 37552 40545 36296 36033 39451 33544 36214 38790 39104 27873 35856 35600 41479 37184 40726 35520 36512 40837 33706 42593 38944 38976 39415 36908 40251 39016 36025 37840 36278 39084 41984 33893 33984 33288 39175 37084 37124 35931 32536 32933 39506 40294 37873 42754 34288 36016 38902 34328 41184 42499 38412 39424 41272 33962 35539 35863 39448 33772 33970 42138 41509 38166 35650 41376 39548 33491 34608 39527 40352 38583 38779 38912 39472 35962 38065 41312 35856 35282 43719 33600 34214 35367 39385 34329 36105 34944 33091 34170 35731 41008 41865 43265 35824 33260 43729 34934 34454 32743 41060 33959 37199 38480 42621 37817 37591 39968 40499 43031 34688 39136 43279 37271 36663 41913 40480 42298 36084 40340 41416 37975 35584 41783 39136 42432 34816 34969 34214 33851 35233 36379 38151 42464 36103 39605 40105 38310 41452 36970 34375 35520 33321 33033 38315 42824 44376 42041 38603 40704 37101 37576 37745 38971 38394 38881 40905 35578 33977 34727 39158 40038 39136 35157 33411 38058 36657 35725 37850 35100 40711 39442 40724 36556 33984 39564 34468 34147 41040 41205 38928 42427 35104 39125 32851 36816 42098 41208 37193 33920 34866 39464 43217 34643 42313 43521 37256 36231 41929 41477 33645 39302 40940 41280 33316 36660 36680 33216 38183 42688 37546 35539 37499 40624 36508 41288 36617 38329 41672 35335 38261 42358 41610 36460 34336 41135 42859 37864 40151 43837 36952 37987 39325 41620 34631 36905 33496 34688 37745 42745 42272 36133 35359 39345 41984 37275 40357 44240 37946 39112 40093 40417 36045 37269 41397 35505 37589 42996 35225 34466 33724 41706 34577 37732 40961 39919 38928 41320 41216 36553 37338 38312 42441 39664 40816 39288 40983 37127 34482 40358 41168 41593 34844 37735 36333 43458 37639 41322 40768 38533 41744 37736 37724 39129 41106 38528 41061 43293 38739 42988 38770 34609 41360 38273 34792 42709 39542 36603 36575 41841 36112 39562 41552 36949 32810 35857 39946 33556 35574 32485 40951 38805 37287 41474 38050 36375 37093 35926 34551 34240 42935 38333 35642 42278 40731 34168 36679 40901 35728 38535 43194 34227 34816 33512 41099 42946 40097 39393 38666 38809 41013 39781 38280 35315 37353 42465 35876 40288 42583 38236 38395 39413 40260 35405 37863 41856 35162 34085 42905 37770 35575 40256 43071 34283 38483 41548 37696 37733 42631 43136 36180 36012 40061 42017 37110 42251 42025 38914 38162 40427 37900 36000 37209 42544 32366 33849 36965 39812 42615 33080 39057 41817 36218 36033 44115 41584 38152 38304 42299 39880 40232 38807 38162 39064 40256 33957 42190 36424 42776 37233 34897 36322 43332 37059 37805 33248 38378 40417 34269 38445 32944 41104 40424 39472 41508 38504 36400 36135 41648 38277 39584 38713 32704 38880 37642 35797 42567 35331 39993 39769 41840 37191 36745 37108 32947 35745 38567 41106 42922 35528 36565 39847 43227 35456 33878 42568 37401 36444 42656 41792 42868 37275 41768 42140 36688 36267 43015 40960 34393 42137 39828 40323 38480 39942 40611 38720 36278 38224 40870 36672 37971 42752 39864 38328 35237 39552 34960 35729 35744 42682 33205 36599 35753 38031 41085 37657 36400 42881 40727 39141 34374 38470 40871 36888 38432 41836 41581 36773 36672 38666 41688 36155 36953 41326 41228 38501 35826 37526 39812 41478 37952 36000 41088 40590 33984 35668 38001 37441 40554 39256 33952 39841 42829 39997 41561 33465 34504 38933 38281 40263 36906 39360 40209 36608 35904 37302 40329 40368 35383 43253 35622 35531 38529 36724 38011 42843 33956 38314 33104 34133 38960 36807 42923 38018 41241 34183 35723 38474 35652 41191 39375 39841 37800 42843 40131 34396 35650 40614 41540 35201 42865 35072 35943 42793 33645 43072 35616 41714 39350 34480 36965 41368 42571 36220 35525 35210 39126 33287 37169 38182 42634 40393 40306 34360 41707 40133 42864 37587 35116 34657 40072 38743 34944 35885 42202 38912 40694 35253 37097 39207 42368 37401 35266 34097 38859 40710 37088 37878 42725 39816 40296 34515 37124 38982 40577 38343 37271 40311 40357 42442 36608 36356 43398 41865 39304 36590 37184 39447 42459 37958 35186 36436 38013 42399 39176 40292 35626 32488 41556 41531 38743 40768 36138 34505 36376 38263 34182 38236 40814 35524 37328 38564 37684 38568 35712 35016 33572 34112 40727 34400 40868 33955 39697 40272 41792 39640 34560 36487 40232 38648 42869 39558 36873 34964 35715 41105 33132 36555 37382 36704 34514 41411 34451 34911 35959 35797 41695 41541 38071 34295 35812 38232 34073 35524 38679 38666 42607 41271 33299 34700 39510 41652 40297 40965 33920 33834 36688 41009 40416 40967 43175 35989 37097 42776 41068 38896 43207 38053 34464 42513 40416 41152 42481 36184 38144 41398 39691 42055 42073 35739 38577 38630 42129 38713 42566 39156 37315 35384 33040 37024 40905 42050 38192 38409 42151 40153 41472 36283 38560 35964 42896 39744 34469 37728 39680 39949 40429 41749 42650 34912 38551 40152 40823 41320 33696 34508 35021 38061 38235 39440 37440 35542 36448 38432 38380 36533 40873 35276 36108 34875 43665 35840 37015 38005 38851 36119 36803 40132 36580 43172 41768 38732 41026 36626 35122 40553 36013 41738 38712 39121 34882 42920 39400 34368 41815 40067 40613 42400 38608 35501 35949 34520 42401 36203 34760 37455 36937 40658 39900 37454 34139 36853 36864 40832 41195 38570 34277 36274 38917 41846 38208 38461 34521 35655 39365 42166 40171 38048 36640 33095 38669 33934 34763 37253 40931 40314 40105 34421 35372 35481 42448 40256 40398 34053 37283 40336 34309 33297 36210 36172 37792 40481 43192 36235 35494 35722 39256 41773 37388 38164 38146 34021 40594 43218 35845 38915 38328 41320 40929 37110 34702 38032 37758 41581 40704 34330 37764 35534 42793 41553 37174 34360 35353 39632 38599 41653 42896 40671 41232 36749 34788 34781 38184 34468 39512 40384 34720 37728 42500 40479 42214 33828 38180 42548 34894 32947 40180 40017 35272 36691 37237 38401 42963 39152 34417 34112 38840 39961 42244 39226 35412 33213 40025 38465 42125 40433 33705 33334 39768 40594 40806 40436 35112 33560 38229 40729 40214 39483 34373 35255 43010 43024 41474 38472 34056 36256 42112 43892 42496 38859 34543 37767 41608 43680 35003 34705 39617 39240 36547 42444 37433 40083 41372 37712 38432 32851 44422 35948 40453 41440 43060 41735 37191 35634 34897 40128 42267 38646 39443 38439 41725 41562 33024 36823 40304 32979 41792 39091 37397 41648 34796 35840 46464 42508 43857 40623 34167 39667 38844 38777 41696 40586 42529 34807 37756 41410 39079 40705 34790 29186 35686 38573 41545 34421 41787 42124 42288 44211 37089 40372 37448 39447 38288 38700 36443 38983 33536 40912 41016 42540 37557 32980 40119 42033 42901 40712 33624 37700 36457 34615 33582 38840 37258 37225 33565 35803 43380 38203 36064 38845 42080 33282 36562 36421 40199 42278 42565 37855 35286 36210 37140 34923 33594 35372 38324 40457 36464 34102 36312 38635 41946 35777 40936 39415 39929 33204 36104 38236 38617 41580 41104 42472 37545 35648 43624 40512 38618 35253 37951 40320 42624 37114 35149 34219 41024 36429 36544 37428 40982 39276 41973 41656 36173 35668 41713 39985 37888 33194 42053 40256 43728 41944 36269 34749 39328 40208 43660 35586 35072 35692 38741 41939 41104 39441 40088 40848 42088 43424 34856 36688 41755 40615 41128 42836 34634 36197 42317 40059 39892 35776 33992 40180 38472 40133 33760 37288 34597 41870 38550 35426 38536 35396 34036 37200 37914 37077 35963 38665 34808 36015 34883 42384 36999 39289 35756 40480 34256 36884 40554 41441 39371 35488 34824 41224 42746 37985 36587 39752 42210 41216 37367 41536 37441 34370 40880 39876 36617 33792 37936 37575 42135 38648 37253 33829 36576 36730 41843 41313 37399 33769 35943 37819 41591 40264 38698 34855 42036 39506 42983 35437 37690 40823 40410 42349 42509 34624 36148 39545 40404 39436 33504 35653 36107 42640 40544 40320 34529 36461 34464 42759 39362 38431 34392 37508 33239 42642 40600 40211 42460 35349 36706 42616 39892 41647 42377 35059 38283 39420 39240 40224 41440 34759 36423 42133 40080 41056 42449 33900 37572 39559 40976 40244 33431 34951 38700 34688 35821 36741 40504 40696 38882 32956 37675 37033 35495 36268 36245 40288 38859 43171 37638 34821 33858 33592 38804 42243 37516 38747 38448 36719 41163 36616 36038 34969 39175 34577 36823 37173 38360 37649 41405 40384 33408 39255 33129 37013 36420 42565 39760 37989 33798 37761 42995 35032 40784 43017 38892 34432 42871 38932 37042 32565 37524 33672 37399 39106 34850 37611 36888 41776 43127 41321 40402 32980 34214 37522 35881 35446 37906 40576 42914 41904 41144 42682 35875 37268 36065 35741 38032 39552 41223 33303 36131 32779 35311 37877 38784 35047 38222 40990 43529 42812 39643 43309 35009 37531 35980 34489 37095 39732 33904 39864 41048 42072 35368 36848 35728 33690 38550 40067 42768 40843 40822 34934 37857 37511 35511 34710 34272 37632 38378 34461 37100 39092 43321 40960 40677 32784 36096 41142 33723 36776 33184 39762 34963 36992 35765 40071 36717 34732 42994 40240 35851 39626 40512 40371 34729 42337 40417 37232 37015 36930 36122 40528 34356 41180 42900 38464 33553 34027 42887 41873 36012 32964 39175 33744 35539 42496 40395 42985 37418 34130 41065 35228 38449 40053 36448 38115 35657 36483 42112 43011 41079 39607 41994 43495 41004 39408 41331 42864 41640 31189 39256 41910 38553 40544 34629 35625 40940 34479 32824 38468 41723 34698 36545 42307 31159 39124 39031 41472 36635 41068 39301 42464 41504 42272 45923 44303 42098 41353 34624 39952 34272 40856 39590 33442 42523 33984 35008 41680 32822 44356 43264 42231 37835 38742 38723 32405 34645 40835 34630 33113 41859 33405 34896 35555 40229 35121 40133 39936 33860 36480 40461 42445 40631 38533 41746 40408 33099 40418 40753 40688 34873 37761 39031 42514 35424 38328 38485 37604 38992 42793 34372 33518 34616 40384 39128 43001 43933 37829 40121 39186 35895 39858 42208 38420 34775 42777 42554 38592 41497 40995 42154 41989 42941 39250 37542 40320 33750 35803 34020 38336 35137 34055 36941 34677 38006 36513 40043 41268 39274 42179 40960 43169 37277 33432 35607 37592 36422 39061 33775 36209 33366 38933 37888 42752 38619 35827 38327 33616 40677 35334 37932 43034 40914 32808 39204 32711 43010 40759 39043 39616 40877 35840 35744 38272 33814 33265 34152 37653 38631 43192 41738 41142 40150 40409 42053 42565 40765 36416 36041 35328 35804 36616 39872 41888 41706 39155 40354 40064 41217 33828 37536 36166 35002 32627 
23544 23751 24168 24338 23335 24292 23616 23932 23756 24327 23351 24102 23655 24004 23424 24567 23819 23685 23771 23865 23309 24435 23785 23737 23936 23883 23168 24576 23985 23123 24093 23855 22896 24576 23996 23089 24229 23712 22948 24655 24150 22984 24131 23627 22907 24771 23704 23057 24320 23968 23057 24906 23207 23590 23817 23201 24121 24116 22912 23941 23819 23545 24097 23285 23933 23448 23483 23958 23657 23417 23748 23426 23851 23844 23432 23704 24044 23539 24235 23223 23963 23479 23338 24033 23780 23354 23861 23471 23937 23839 23424 23584 23815 23228 24329 23415 23677 23543 23867 23445 24122 23019 23985 23256 23544 23720 23723 23335 23983 23129 23984 23687 23412 23562 23702 22999 24283 23329 23834 23274 23681 23528 24198 22923 24039 23271 23536 23757 23732 23527 23840 23205 24122 23494 23478 23501 23812 23140 24281 23108 23810 23427 23767 23266 24220 23281 23600 23552 23687 23969 23668 23968 23687 23912 23459 24048 23654 24059 23830 24300 23968 24075 23781 24080 23730 24189 23817 24356 23918 24463 23837 24491 23844 24341 23766 24178 23689 24121 23788 24072 23576 24129 23492 50 11178 14742 14772 16068 15654 16401 16226 16825 16407 33938 27927 27010 25714 25831 25139 25357 24655 25145 24609 25024 24490 24939 24420 24819 24375 24890 24395 24861 24329 24768 24301 24628 24310 24684 24388 24658 24227 24674 24316 24597 24162 24381 24203 24502 24205 24388 24013 24328 23823 24231 24512 24710 24386 24425 24174 24327 23905 24034 23925 23703 23560 23605 23821 23861 23471 23650 23201 23181 22952 23041 22949 23202 23065 23283 23031 23059 23708 23769 24098 23818 24100 23951 24210 23965 24082 23884 23959 23912 24077 23836 24007 23783 23944 23698 23985 23548 23924 23623 23801 23644 24050 23752 24016 23635 24000 23566 23980 23644 24049 22983 23442 23530 24135 23769 24207 23576 24130 23477 23906 23432 23856 23274 23800 23313 23820 23352 23816 23351 23791 23510 24101 23688 24313 23744 24331 23966 24658 23967 24576 23980 24362 23966 24226 23666 23862 23362 23861 23233 24065 23536 24199 23841 24337 23736 24263 23738 24150 23623 24011 23561 23953 23777 23827 23553 23744 23276 23712 23332 23688 23512 23831 23651 24152 23964 24347 24038 24466 24128 24370 24024 24356 23705 23664 23095 23104 23062 23856 24070 24507 24106 23897 11205 15479 16292 16753 16619 16983 17638 18770 19010 18992 29045 26500 24932 24503 24387 25255 25102 24843 24237 24312 23876 23889 24363 24449 24660 24059 23936 23823 24378 24135 24077 23942 23830 23771 24285 24357 24356 23738 23811 23885 24285 23714 24119 23543 24392 24186 24080 23426 24151 23933 24057 23579 23705 23963 24513 23727 23801 23849 24275 23593 23943 23725 24583 23825 23865 23493 24299 23560 24497 23229 24221 23975 24138 23232 24170 23730 24041 23325 24029 23949 24408 23386 24071 23788 23961 23393 24067 23961 24431 23307 23879 23815 24071 23984 23800 23585 24445 23649 23765 23700 24110 23157 23716 23908 24359 23376 23867 23849 23982 24024 23595 23960 24335 23471 23907 23731 23952 23287 24199 23989 23880 23289 24156 23575 23536 23432 24813 23687 23186 23951 24144 23301 23335 24524 24400 22637 23963 23863 23769 22875 24597 24849 23710 22853 24308 23639 23434 23301 24824 23961 22780 23767 24032 23432 23146 23808 24546 23571 23531 24032 23552 23456 23845 24134 23447 23680 23868 23887 23584 23654 23991 24081 23435 23673 23796 23900 23367 23825 24037 24027 23331 23906 23740 23761 23575 23676 23832 24176 23351 23716 23649 5603 17321 18240 18823 19495 18832 19352 19479 19832 19279 29552 26076 26004 24772 24560 24042 24768 23993 24166 23571 24553 24160 24364 23404 24192 23878 24185 23521 23907 23850 24482 23779 23712 23580 24277 23481 23969 23159 24339 23904 24133 23238 24052 23774 23970 23653 23808 23561 24368 23757 23711 23584 24165 23595 24416 23296 24004 24014 24199 23409 23784 23849 24024 23488 23741 23159 24272 24105 23712 23136 24269 23781 23736 22861 24272 24704 24075 22738 23594 24000 24228 23319 23276 23077 24593 24503 23393 22869 24134 23975 23587 23063 23397 24522 24588 23177 22881 23453 24304 23690 23418 23575 23871 24169 23632 23507 23744 23950 23559 23653 23352 23719 23991 24068 23437 23667 23732 23832 23735 23533 23776 24247 23783 23552 23489 23984 23655 23782 23364 23584 23814 24236 23399 23598 23548 24121 23443 23865 23147 24032 23873 24201 23201 23751 23540 24091 23405 23774 23383 24274 23787 23736 23239 24176 23664 23861 23219 23629 23520 24288 23687 23726 23221 24167 23562 23771 23436 23641 23682 24343 23447 23610 23418 24192 23300 24117 23072 24199 23808 24066 23212 23822 23652 23916 23576 23495 23736 24340 23716 23597 23433 24133 18084 20470 19837 20885 20951 21145 20381 21071 20973 35381 25538 24543 23708 24960 24895 23928 22871 24179 24151 23636 23447 23168 24220 24947 23517 22959 24089 24189 23583 23093 23680 24924 24019 23053 23239 24391 23508 23564 23047 23808 24215 23789 23508 23751 23973 23573 23560 23648 24186 23808 23466 23632 24001 23532 23655 23399 24151 23889 23590 23483 24039 23540 23608 23291 24232 23915 24060 23218 23833 23698 23859 23466 23659 23881 24222 23232 23792 23671 23927 23283 23739 23809 24320 23511 23707 23634 24101 23337 23643 23529 24297 23632 23674 23372 24067 23320 23785 23239 24279 23784 24001 23059 24048 23584 23818 23111 24159 23789 23720 23330 24135 23305 24148 23069 24296 23714 23735 23216 24167 23445 23728 23168 24219 23779 23762 23190 24016 23411 23988 23161 24212 23740 23584 23531 23908 23085 23527 23804 24198 23243 23802 23760 23861 23107 23252 24457 24144 22730 24208 23609 23488 23177 24833 23847 22803 23828 23815 23247 23392 24578 23879 22791 24215 23511 23281 23232 24698 24148 22871 23747 24229 23397 23316 23695 24013 23965 23204 23837 23613 23520 23339 24146 23848 23469 23624 23891 23866 23495 23581 24199 23380 17901 21588 22023 21639 22202 22344 22158 21854 22577 22025 25271 23827 24512 23747 23728 23719 23815 23337 23794 23888 23901 23202 24161 23384 23797 23155 24320 23584 23579 23639 23930 23218 23677 23811 24019 23111 24000 23368 23887 23303 24309 23536 23660 23392 23940 23200 23596 23841 23986 23139 24087 23381 23735 23228 24316 23542 23651 23683 24054 23310 23622 23658 24299 23258 23728 23640 23817 23111 24208 23684 23488 23607 23827 23229 23680 23835 23815 23228 24086 23345 23386 23866 24114 22982 23784 23862 23626 23018 24687 24042 22801 24007 23591 22993 23752 24563 23561 22806 24304 23261 23357 23027 24793 23448 23045 24064 23418 22743 24407 24081 22755 23943 23528 23449 23664 24064 23510 23421 23668 23664 23207 23945 23671 23344 23729 23625 23257 23975 23764 23437 23484 23817 23388 23453 23843 23956 23162 23977 23442 23692 23579 24125 23255 23828 23463 23879 23290 24232 23337 23687 23529 23822 23374 24229 23154 23896 23307 23735 23028 24169 23430 23559 23603 23741 23120 24151 23319 23834 23376 23801 23320 24183 23009 23994 23231 23466 23560 23941 23037 24035 23168 23485 23680 23884 23049 23936 22479 23607 23602 24113 23044 23956 23204 23465 23655 23953 23079 23985 23320 23481 23447 24131 23140 23812 23335 23539 23353 24128 23261 23628 23642 23522 22639 24377 23687 22916 23700 23723 23085 23596 24589 23296 23109 24068 23303 23147 24503 23721 22727 24266 23250 22904 24316 24600 22827 23603 23829 23160 22924 24651 23340 23400 23838 23785 23324 23755 24028 23161 23585 23564 23776 23316 24032 23499 23365 23598 23565 23156 23812 23781 23591 23468 23725 23031 23484 23842 23684 23235 23906 23500 23431 23827 23752 23216 23922 23164 23397 23746 23953 23072 23959 23163 23573 23555 23965 23019 24083 23354 23760 23319 24236 23143 23719 23373 23757 22972 24205 23439 23514 23510 23758 23181 23882 23633 23543 23427 23852 23196 23744 23756 23660 23207 24054 23201 23400 23700 24076 23087 23894 23296 23532 23456 24111 23159 23869 23315 23648 23566 24200 23463 23471 23503 23588 23014 24148 23597 23360 23715 23619 22807 24143 24125 22770 23758 23619 22935 23001 24474 23962 22584 24199 23238 22977 24108 24353 22537 23896 23751 23211 22929 24740 23684 22711 23719 23684 22963 23677 23979 23117 23745 23600 23485 23415 24068 23273 23638 23461 23511 23344 23984 23232 23648 23524 23762 23348 24134 23207 23624 23559 23579 23266 24145 23298 23712 23557 23639 22978 24188 23415 23442 23516 23745 23069 24048 23546 23450 23472 23808 23149 23713 816 11191 12880 13882 13621 14737 14763 14786 14981 15373 31856 28892 27460 26711 25524 25966 24389 25031 25043 25127 24375 25169 24267 24686 24562 24971 23993 12023 15511 16627 16441 17668 17146 17351 17612 17881 17431 30160 28073 26788 25784 26076 25067 24992 24941 25394 24321 24970 24576 24840 24120 25236 24385 24243 16056 18081 17550 19801 19010 18504 19527 19665 19011 36051 28832 26264 25184 25948 24684 24311 25461 25144 23652 25146 24257 23851 24855 25040 23351 24777 24178 18829 20247 20902 20480 20556 21181 20530 20784 21149 29423 25768 25207 24925 25076 24187 24939 24480 24084 24349 24311 24151 24146 24484 24404 23716 24301 18185 21408 21641 22713 22393 22192 22273 22557 22001 22445 25768 25077 23897 24663 23908 24256 24016 24727 23652 24247 23903 24224 23556 24598 23991 23890 23984 24216 23767 24079 24233 24308 23471 24423 23688 24258 23768 24704 23656 24096 23872 24215 23511 24504 23931 23910 23983 24167 23406 24481 23970 23894 23784 24261 23556 24212 24092 24150 23492 24389 23655 23977 23757 24503 23614 24033 23815 23915 23498 24569 23651 23912 23822 24075 23343 24501 23831 23609 24018 23914 22904 24519 24336 23125 24326 23760 23010 24969 23837 23112 24136 23836 23306 23920 24820 23376 23470 24176 23569 23490 24812 23577 23030 24431 23477 23168 24491 24295 23343 24039 23738 23292 24196 23906 23621 23885 23822 23522 23846 24115 23635 23793 23917 23546 23916 24009 23625 23535 24044 22830 23575 23992 23767 23360 23932 23246 23660 23815 23645 23453 23989 22645 23461 23797 24090 23155 23941 23411 23900 23477 24258 23196 23762 23407 23854 23347 24258 23417 23638 23613 23812 23130 24275 23438 23730 23617 23774 22982 24225 23511 23586 23586 23815 23079 24238 23329 23671 23470 23876 23255 24332 23200 23917 23440 23781 23473 24296 23234 23767 23495 24236 23207 24141 23165 23936 23415 23625 23541 24080 23180 23848 23364 23488 23802 23735 23232 23898 23377 23564 24053 23203 23328 23991 23068 23869 24262 22745 24028 23345 23125 24734 22573 24125 23231 22866 24451 23555 22560 24279 23226 23019 24576 23326 23314 23983 23209 23665 24437 22738 23827 23383 23354 23889 23487 23328 23799 23414 23598 23880 23381 23744 23479 23182 24068 23348 23682 23459 23558 23741 23831 23168 23904 23369 23538 23808 23527 23454 23692 23022 24079 23239 23748 23275 23352 23718 23665 23405 23750 23083 24117 23188 23814 23222 23480 23652 23744 23131 23874 23232 23956 23507 23559 23428 23525 23655 23799 23289 23803 23088 24064 23316 23707 23309 23518 23687 23703 23264 23861 22953 24262 23334 23847 23225 23538 23639 23778 23280 23659 22868 24200 23111 23849 23226 23572 23649 23469 23341 23625 23680 23667 23441 23730 23169 24102 23105 23917 23241 23345 23962 23084 23761 23354 24144 23421 23559 23364 23002 24603 22522 24156 22929 24471 23127 23959 23083 23406 24283 22931 23499 22885 24511 22734 24001 23191 23990 23315 23874 23764 23343 23641 23547 23303 23451 23731 23456 23335 23328 23824 23288 23539 23360 23821 23417 23607 23401 23613 23740 23517 23588 23124 24040 23117 23744 23047 24085 23012 23765 22959 24122 8765 12809 13340 13696 13478 14122 14055 14906 14773 40394 29924 28196 26793 26568 25771 13234 15819 17013 17198 17770 17637 18151 18071 18009 18029 29780 27861 26739 26007 26401 11906 18282 18949 19640 19644 19513 19630 19704 20059 19769 28999 27030 26195 25610 25213 24999 19999 20677 20590 20904 21242 21184 20919 21269 21101 30069 26049 25798 25299 25376 24480 21699 21998 22776 22353 22921 22016 22923 22029 23021 21888 25609 24072 25585 23837 24717 23776 25120 24023 24226 24503 24289 24248 24204 24855 23753 24682 23857 25244 23522 24157 23795 24576 24396 24207 24953 23409 24800 23685 25017 23652 24793 23640 24897 23916 24207 23926 24396 23950 23970 24045 24164 24247 23876 24513 23862 24396 23911 24553 23664 24166 23737 24406 23972 24459 24221 23956 24087 23958 24194 23869 23788 23996 23889 24304 23861 24310 23721 24407 23761 24362 23631 24364 23791 24484 23488 24383 23412 24549 23552 24103 23847 24055 23861 23918 24045 24096 23664 24183 23597 24366 23552 24547 23346 24189 23489 24177 23826 24002 24010 23895 23633 24201 23489 24256 23344 24423 23389 24001 23808 24037 23773 23888 23925 24039 
23042 22217 22492 22669 22348 21845 22984 22537 22205 22459 22435 21767 22734 22839 22339 22055 22861 22116 22458 22663 22503 22034 22919 22054 22442 22640 22613 21853 22851 22056 22364 22417 22666 21883 22708 21937 22615 22397 22642 21735 22859 22437 22415 22531 22580 21952 22778 21911 22727 22494 22390 22054 22596 21495 23133 22205 22423 22016 22464 22236 23099 21545 22839 21961 22347 22445 22571 21899 22791 21480 23006 22261 22247 22342 22176 21974 22985 21629 22858 21974 22144 22397 22825 21987 22832 21920 22813 22470 22329 22248 22532 21760 23157 21847 22576 22096 22370 22042 23563 21383 22990 21143 21681 23477 21845 22029 22536 21431 23152 23107 21372 22637 22065 21227 23787 21702 22188 22237 21472 22727 23240 20871 22939 21913 21369 23464 21575 22256 22480 21408 22649 22663 21829 22605 22072 22194 22729 22052 22371 22182 21946 22513 22535 22086 22212 22456 22202 22277 22696 22452 21942 22742 22187 22256 22592 22849 21723 22617 22039 22367 21908 23141 21912 22200 22262 22496 21591 22855 22417 22216 22101 22589 21657 22682 22515 22562 21683 22857 21731 22167 22369 22907 21559 22728 21997 22346 0 527 697 1543 2391 3063 4444 37833 33995 30838 29147 27366 26694 25632 25240 24615 24434 23836 23760 23544 23552 23191 23437 22912 23169 22622 22948 22601 22900 22420 22855 22300 22784 22231 22822 22231 22622 22161 22567 22042 22736 21911 22554 22053 22512 21845 22427 21925 22509 21769 22672 21747 22606 21762 22419 21781 22405 21792 22337 21673 22430 21744 22301 21599 22372 21512 22038 21440 22274 21929 22497 21592 22199 20906 21911 21591 22025 21239 21764 21243 21990 21297 22026 21335 22333 21237 22091 21629 22274 21719 22413 21913 22438 21821 22483 22035 22520 21831 22311 22205 22683 22298 22960 22412 22920 22422 23019 22599 23075 22790 23479 23127 23629 23177 23684 23180 23218 22679 23032 22752 22863 22247 23056 22736 22568 22099 22148 21248 21424 20944 21186 20749 21128 21179 21917 21659 22170 22263 22917 22599 22726 22451 22170 22232 21910 22249 22100 22117 21558 21831 21774 21849 21831 22035 22173 22439 22456 22689 22368 22731 22425 22807 22172 22368 22210 22449 21890 22227 21684 21971 21432 22208 21724 22441 22080 22584 22024 22647 22064 22464 21872 22285 21705 22594 21479 22088 21421 22560 22195 116 104 4750 6583 8664 8860 10389 10716 12305 42453 37945 32635 30416 27833 27305 25187 25559 24860 25297 24408 24549 23429 23383 22951 24009 23051 23512 22641 23144 22469 23632 22908 23397 22248 22779 22497 23290 22432 23401 22080 22883 22771 23213 22120 22609 22601 22884 22192 22450 22247 23177 22728 22663 21913 22935 22435 23042 21527 22700 23416 22903 21324 22204 22809 22509 21647 21512 22611 23874 22368 21338 22096 23043 21915 21633 21548 23777 23009 21472 21152 22985 22261 21850 21697 23769 22963 21449 21467 22983 22437 22058 22062 22336 23061 22219 22036 22352 22519 21801 21920 22528 22860 22005 22181 22522 22467 21896 22278 22296 23191 21944 22309 22488 22532 21803 22567 22648 22688 21704 22661 22197 22393 21696 23022 22189 22295 22135 22691 21802 22320 22255 23029 21683 22439 21996 22633 21512 22903 22429 22490 21764 22854 22016 22551 21851 23089 22349 22245 22019 22864 21756 22313 22127 23297 22055 22302 22149 22429 21853 22473 22487 22667 21581 22986 21734 22611 21500 22873 22331 22336 21937 22762 21890 22476 21776 23013 22400 22222 21977 22743 21936 22223 22224 23000 22425 22264 21895 22864 22016 22332 21351 172 6065 9059 10476 13568 13866 14479 14278 16248 17504 37640 30865 29035 27744 26121 24626 24038 24919 25332 23158 22921 22997 24016 22759 22598 21901 23802 23908 22379 21440 22749 23189 22421 22633 22252 23146 23005 22733 22208 22942 22708 22618 22274 22168 22879 23095 22564 22225 22563 22854 22233 22544 21975 22987 22853 22623 21927 22599 22519 22619 22017 22437 22309 23178 22439 22500 21911 22928 22128 22682 21706 23031 22542 22780 21673 22848 22156 22660 21756 22278 22184 23221 22454 22420 21958 22854 22042 22807 21568 22968 22500 22976 21626 22671 22235 22711 21869 22306 21875 23160 22539 22341 21717 22864 22059 22567 21557 22624 22221 23285 22112 22364 21958 22869 21959 22435 21724 23053 22604 22568 21689 22634 22235 22555 21719 22190 22084 23252 22391 22469 21744 22789 22057 22510 21725 21881 22575 23776 22222 21604 21696 23086 22202 21841 21187 22144 23382 23269 21246 22272 22766 22428 21896 21413 21417 23091 23477 22378 21040 22262 22810 22209 22027 21477 22085 23228 22734 21876 22289 22460 22616 21968 22101 22107 22852 22611 22272 21876 22549 22407 22240 21989 22315 22396 23040 22080 22268 22035 22693 22143 22427 21813 10063 13297 15355 15649 17369 17664 18400 18122 18681 33972 30839 27479 25974 24427 24985 23569 23436 22606 23699 23313 23715 22417 22748 22777 23056 22401 22645 22611 23556 22400 22483 22249 23162 22000 22776 22008 23506 22770 22951 21775 22844 22243 22729 21798 22827 22614 23046 21635 22932 22144 22709 21851 22498 22603 22929 21865 22695 22292 22597 22144 22443 22455 23104 22007 22344 22320 22928 22006 22394 22021 23100 22578 22277 21752 22821 22171 22208 21163 23175 23220 22044 21324 23045 22656 22469 21261 22573 23414 22833 21108 22193 22648 22304 21644 21730 23149 23417 21396 21632 22381 22932 21835 21488 22105 23866 22277 21829 22567 22159 22528 21913 22923 22706 22315 22120 22647 22160 22360 21940 22776 22595 22238 21869 22779 22196 22133 21687 22958 22567 22252 22049 22839 21889 22345 22308 23069 22008 22275 22400 22481 21733 22244 22378 23028 21719 22486 22120 22903 21525 22896 22446 22364 21862 22860 21925 22153 22500 22903 21687 22644 22025 22375 21590 23240 22200 22354 21914 22896 21993 22291 21719 23176 22335 22200 21733 22833 21941 22288 22141 23105 21665 22583 22223 22630 21515 22736 22511 22777 21675 22718 22049 15040 16726 19315 19118 19637 20085 20557 20190 20448 20841 27799 24744 24375 23539 24033 22124 23739 23388 22209 22589 23186 22296 22011 23447 23675 21639 22041 22865 22173 21200 23219 23349 21704 21619 23112 21879 21563 22731 23670 21291 22248 22892 22281 21428 22711 23480 21893 22144 22388 22323 21801 22791 22656 22068 22200 22624 22247 21991 22330 22983 22338 22109 22344 22442 22052 22579 22610 22391 22039 22636 22016 22231 22330 23011 21765 22525 22192 22341 22002 23040 21986 22433 22105 22483 21589 22748 22403 22259 21825 22840 21765 22404 22375 22718 21504 22801 21979 22593 21872 23057 22267 22249 22107 22680 21736 22537 22396 22597 21742 22954 22172 22317 22401 22716 21513 22730 22023 21895 21490 23207 21789 22359 22102 22048 21661 23091 22087 22164 22170 22613 21597 22880 22506 22401 21926 22697 22053 22193 22344 22824 21655 22856 21917 22245 22222 23289 21695 22669 22247 21839 22109 23547 20925 22912 21895 21645 22495 23639 21797 21766 22582 21961 21397 23812 21463 22163 22332 21641 22119 23352 21034 22758 21833 21397 23091 23006 21808 22264 21866 21888 22974 21797 22328 22309 22057 22173 22922 22275 22052 22437 22540 21760 22811 21980 22164 22279 22521 21868 22787 22305 22096 22128 22294 21534 22913 22241 22040 22083 22520 21780 22472 22583 22327 21803 22743 21705 22128 22139 22934 21582 22766 21921 22121 22221 23015 21696 22573 22094 22283 21750 23113 21857 22263 22122 22505 21608 22753 22272 22279 22125 22413 21799 22560 22360 22393 21625 22795 21760 22197 21923 23116 21600 22617 22039 22448 21707 23045 22102 22217 22184 22453 21667 22519 22548 22131 22059 22479 21841 22536 22429 22248 22032 22656 21930 22167 23098 22207 21733 22919 21509 21920 23508 22008 21202 22965 21120 21335 22427 23509 20951 22691 22127 21863 21785 23681 21768 21666 22704 22049 21099 23213 23086 20969 22675 22128 22051 22434 22941 21743 22485 22132 22255 21931 22802 22199 22165 22431 22257 21705 22895 22376 22050 22306 22281 21623 22908 22336 22089 22134 22525 21792 22498 22484 22414 21784 22731 22040 22339 22496 22704 21647 22814 21868 22169 22349 23160 21577 22561 22096 22626 21699 22948 21908 22299 22216 22509 21463 22912 22290 22386 22048 22688 21783 22185 22308 22888 21713 22767 21786 22272 22049 23086 21508 22853 21798 22230 22195 22871 21552 22699 22030 22231 22197 22934 21690 22720 21989 22295 22099 22825 21670 22664 21960 22297 22125 23129 22039 22313 22299 22616 21178 23540 22275 21504 22711 22031 21116 22957 23213 21269 137 109 1343 6056 8393 7883 10413 10897 10436 13658 43124 36591 32979 30928 28141 27112 27724 25285 25029 25018 24544 24055 24949 24056 23737 23989 23719 186 5463 9789 11635 12705 14289 14942 15331 16331 43588 38748 34432 30752 28797 27213 27121 25680 24967 24763 24753 23709 24644 24228 23719 23475 23984 23212 5527 10401 12997 14528 16425 16755 17559 17986 19181 39733 34848 30336 28376 26752 26743 24876 25111 24309 23927 23224 24722 23291 23728 23387 23664 22775 9051 11979 14860 16704 18028 18149 19513 19621 20165 19353 34467 29084 27632 25723 26144 24181 24512 23953 24052 22921 24201 23570 23318 23029 23753 22885 23093 15485 18601 18769 19988 20443 20897 20233 21641 21532 21264 27460 26376 24425 23371 24367 24396 22205 23891 22960 22691 22733 24522 22251 22332 23321 22745 21639 23783 23950 22160 22453 23411 22313 21939 23365 23722 21395 23207 22562 22156 22278 23895 22551 22453 23117 22393 22319 22862 22918 22166 22824 22450 22224 22872 22918 22134 22768 22560 22592 22331 23380 22569 22327 22497 22726 22235 22912 22771 22324 22249 22951 22039 22904 22805 22535 22185 22835 22339 22489 22738 22834 21847 22909 22311 22568 22634 22737 22063 22792 22218 22205 22499 23003 21701 22955 22085 22467 22311 23211 21710 22919 21876 22803 21827 23259 21979 22617 22287 22420 21979 23284 21921 22538 22160 22954 21616 23173 22395 22468 22227 22608 21749 23065 22469 22295 22357 22597 21700 22563 22573 22274 22004 22513 21632 22629 22519 22183 22032 22639 21806 22455 22562 22417 21877 22752 22025 21541 22265 23373 21058 22485 22107 21645 22359 23591 21185 22441 22500 21979 21864 23798 21655 21924 22666 22050 21571 23851 21760 21709 22817 21737 21333 23837 21886 22055 22330 21865 22620 22497 22135 22246 22368 21914 22686 22467 21956 22337 22368 22016 22418 22698 22173 22330 22497 21729 22810 22400 22080 22244 22324 21652 23034 21973 22528 22105 22409 22217 23077 21655 22903 21956 22313 22278 22984 21571 22785 21826 22598 22307 22230 22164 22548 21835 23145 21859 22500 22007 22467 21852 23200 21563 22759 21888 22537 22175 22915 21594 22827 21843 22252 22516 22317 22039 22644 21733 22800 22272 22295 22097 22537 21531 23176 21778 22521 22026 22266 22339 22790 21721 22658 21657 22343 22492 22221 22209 22400 21474 23043 21848 22454 21959 22083 22407 22439 21856 22486 21251 23376 22292 21816 22174 21514 23032 22467 21852 22688 21596 22446 22983 21333 22672 21929 22440 22949 21271 22708 21173 23408 22853 21410 22574 21482 22887 22355 22156 22117 22083 22402 22586 22132 22391 21853 22744 22131 22158 22320 22048 22688 22275 22256 22350 21816 22937 21674 22716 21703 22729 22353 22313 21979 22169 22369 22648 22071 22494 21623 23212 21654 22808 22064 22577 22203 22528 21878 22251 22395 22187 22196 22418 22104 22736 21972 22497 21609 23065 21525 22839 21705 22992 21653 22771 21805 22700 22221 22424 21807 22217 22444 22184 22144 22319 22455 22341 22071 22613 22436 22437 22025 22225 22116 22807 21829 22586 21805 23115 21696 22699 21585 23150 21628 22834 21828 22723 21930 22609 21555 22897 21812 22822 118 2653 5169 7663 8239 11378 10253 12758 11794 43607 39287 35387 30596 30986 26839 4356 8057 13891 13154 16037 15217 18459 16847 17796 43232 39992 33257 30985 27816 29040 6163 11991 13953 17801 17091 18215 18880 19413 19981 19439 36633 32016 29410 27381 26832 12707 15406 17230 19143 19050 20407 19929 21209 20292 21141 33955 31179 27400 27044 25287 25707 17740 20151 20101 21924 20949 21628 21415 22272 21741 29312 26883 25777 24951 24521 24269 23993 23625 23643 23725 23508 23081 23382 23431 23456 22889 23408 23061 23549 22703 23858 22391 23477 22211 23768 22444 23296 22465 23587 22584 23133 22212 23367 22322 22833 22489 23095 22482 23224 22699 22795 22384 22727 22673 22983 22323 22963 22458 23041 22344 23373 22030 23072 22056 23284 22273 22703 22378 22889 22487 22732 22807 22528 22277 22456 22805 22642 22169 22492 22848 22368 22313 21963 23311 22158 22069 22705 21716 23302 21671 23977 21290 22302 22249 22632 22956 22169 23496 21504 22348 21935 23005 22706 21912 23849 21166 22712 21568 22935 22616 22032 23617 21355 22496 22314 22547 22604 22448 22723 22304 22247 22492 22289 22788 22094 
