# Supplementary material for: An Active Feature Selection Strategy for DWT in Artificial Taste
Source: Hindawi journal article supplement (doi:10.1155/2018/9709505), 2018-01-01
Supplement: f1 [file 9709505.f1.zip › puerTea-med-2.txt]

43464 43440 43474 43480 46 6999 17638 19593 21329 21111 22675 21836 22348 22257 22645 21700 23188 22381 22641 22201 23197 22055 22753 22704 23072 22072 23272 22191 22682 22576 23575 22016 23172 22302 23121 22269 23687 22312 22979 22602 23060 22016 23583 22621 22874 22417 23311 22129 23072 22852 23062 21996 23523 22234 22743 22650 23527 22086 23243 22461 22882 22592 23632 22442 22997 22759 23044 22186 23445 22902 22774 22766 23000 22152 23169 23110 22852 22177 23484 21832 22114 22480 24154 22151 22328 23040 23045 21691 23959 22804 22055 23334 23015 21802 23315 23682 21847 23076 22666 21728 23513 23696 21881 22860 22841 22197 22721 23408 22352 23004 22768 22884 22165 23289 22999 22551 22791 22807 22277 23124 23004 22899 22656 23284 22390 22809 22944 23194 22157 23287 22444 22656 22748 23362 22124 23296 22419 22852 22576 23501 22017 23377 22468 22862 22052 23712 22343 22940 22420 23262 22020 23620 22670 22856 22595 23232 22247 23064 22944 23281 22016 23478 22146 22828 22683 23602 21975 23414 22368 23065 22422 23625 22752 22893 22503 23226 21991 23383 22792 23168 22225 23322 22330 22700 4477 16198 17284 19337 18900 19747 19376 20697 19734 20377 30858 26071 23744 24442 23842 23622 23053 23640 22839 22794 23543 24073 22390 23022 22941 22885 22037 24133 23020 22137 23329 22681 21868 23150 23933 22070 22935 22970 22480 22252 23900 22833 22062 23448 22408 22024 23536 23723 21740 23143 22977 22469 23154 22926 22763 22507 23117 22533 22743 23123 22863 22555 23143 22201 22771 23049 23097 22180 23317 22535 22759 22759 23516 22197 23261 22475 22952 22537 23618 22148 23172 22477 23060 22083 23506 22724 22947 22579 23139 22038 23681 22583 22921 22631 23155 22017 23696 22557 23072 22658 23104 22233 23414 22706 23048 22511 23216 22176 23558 22544 22904 22679 23161 22109 23148 22898 23045 22457 23351 22053 23181 22798 23232 22220 23392 22235 22836 22743 23143 22318 23394 22759 22897 23009 23272 22338 23257 22488 22738 22978 23081 22225 23232 22403 22784 23042 23227 22136 23331 22257 22247 23532 23296 21636 23496 22205 22048 23594 23369 21632 23523 22307 21925 23803 22802 21984 23384 22427 22233 23953 22795 21751 23406 22318 22101 23701 22848 21984 22912 22869 22520 23552 22301 23204 22427 22674 22803 23251 22304 23111 22643 22688 16903 20189 19912 21237 20616 21190 21216 22165 20918 34625 25365 24240 23130 24162 22808 23507 22673 23304 22704 23781 22338 23407 22556 23115 22682 23436 22223 23591 22290 22962 22744 23431 22255 23532 22246 23040 22997 23304 22327 23400 22289 23054 22736 23233 22272 23381 21917 22858 22878 23144 22221 23212 22444 23263 22839 23096 22315 23255 22092 23136 22864 23086 22208 23367 22692 22917 22873 23021 22445 23105 22315 23126 22905 22784 22765 23043 22150 23416 22773 22871 22615 23308 22000 23446 22457 22724 22916 22674 22161 24020 21606 22480 22953 22530 22688 24093 21728 23227 22372 21858 23847 22675 22004 23343 22521 22102 23837 22390 22421 22868 21882 23564 23401 22176 23035 22456 22736 23001 22951 22772 22913 22280 23197 22935 22585 22732 22872 22320 23495 22444 22959 22594 22854 22666 23240 22257 23319 22332 22899 22901 22936 22385 23116 22072 23454 22821 22822 22601 23025 21930 23655 22528 23028 22369 23187 22324 23592 22066 23238 22352 22916 22444 23600 22041 23336 22279 22870 22694 23358 22093 23327 22072 23109 22848 23033 22343 23248 22092 23219 22720 22870 22535 23120 21859 23545 22505 22922 22460 23127 22180 23623 14265 20475 20809 21440 21177 22485 21289 22210 21560 21830 26138 24520 22616 23718 22686 22624 22724 24113 22072 23168 22784 22455 22677 24032 21568 23186 22686 22276 22890 24041 21863 22790 22740 22611 21760 24034 22749 21906 23244 22478 21761 23649 23335 21816 23017 22619 22686 22633 23584 22381 22708 22772 22872 22327 23095 22929 22643 22759 23051 22685 22706 22992 23372 22247 23008 22653 23368 22305 23417 22892 22808 22568 23264 22216 23059 22907 23159 22304 23383 22396 22858 22708 23601 21956 23238 22266 23072 22113 23694 22091 23076 22434 22962 22208 23618 22368 22935 22570 23159 21880 23631 22537 22935 22538 23200 22048 23424 22839 22882 22534 23272 22372 23112 22804 23025 22457 23287 22199 23111 22696 23052 22150 23340 22272 22672 22703 23273 22106 23328 22409 22777 22490 23362 22123 23230 22421 22739 22346 23560 22417 22824 22660 23204 21720 23787 22832 22070 23032 23014 21516 23372 23354 21768 22903 22592 21616 23773 23206 21712 22973 22726 21628 23307 23437 21767 23045 22889 22181 22237 23899 22960 21804 22920 22770 22253 23293 22925 22589 22744 22843 22464 22995 23054 22634 22602 23095 22628 22625 22993 23083 22226 23203 20210 21569 22112 22599 21489 22688 21804 22561 21483 28754 23389 23192 22801 23188 22199 23284 22837 22963 22442 23237 22079 23086 22817 23068 22029 23271 22166 22721 22764 23210 21985 23350 22244 22776 22759 23172 21956 23315 22141 22823 22631 23593 22133 23235 22566 23047 22394 23751 22101 23303 22434 23042 22140 23467 22694 22780 22443 23338 22528 22650 22816 23309 22051 23128 22406 22828 22176 23568 22372 22829 22593 23047 22368 23040 23016 23097 22153 23328 22360 22368 22276 24140 22811 21871 22790 22821 22005 22338 23752 22844 21600 23273 22641 22403 22050 23984 22706 21911 23057 22646 21961 22846 23697 22443 21952 23193 21985 22358 23296 22774 22728 22554 23212 22521 22537 22903 23283 22310 22869 22560 22767 22596 23440 22285 22880 22668 22976 21959 23160 22867 22583 22582 23115 22144 23105 22916 23140 22194 23269 22764 22769 22852 23245 21990 23389 22199 22820 22625 23311 21922 23329 22294 22848 22567 23505 22058 23301 22258 22948 22501 23488 21865 23203 22242 22981 21956 23508 22439 22818 22456 22984 21955 23672 22322 23075 22455 23112 22227 23701 22016 23270 22272 22967 22394 23541 22055 23202 22421 22759 22821 23180 20104 22513 22066 22743 22620 22500 22359 22669 21650 23324 23068 23239 22624 22519 22551 23589 21664 23275 21562 22105 23597 22842 22080 22972 22026 23204 23298 21888 23045 22503 22236 24000 21509 23132 22307 21988 23874 22682 22055 23015 21947 22938 23307 22269 23152 22338 23024 22870 22669 22681 22935 22256 23262 22569 22707 22545 22648 22886 23076 22348 22996 22190 23141 22732 22759 22562 22845 22788 22990 22385 23092 21989 23553 22219 23353 22333 22841 22740 22776 22414 23027 22048 23553 21964 23430 22136 23331 22496 22968 22400 22745 22673 23005 22372 22983 21920 23652 21990 23454 22297 23368 22314 23196 22232 22768 22748 22839 22609 22957 22807 23160 22452 23165 22083 23360 22044 23303 21895 23491 22020 23215 22135 23312 22363 22845 22412 22519 22816 22652 22636 22870 22665 22946 22490 22913 22308 23457 22071 23247 21968 23485 22225 23269 21633 22951 22887 22809 22381 22183 23748 21943 23040 22151 23292 22485 22849 22600 22778 23424 22101 22708 21610 23878 21857 23340 22109 23260 22892 22764 22274 22150 23543 22434 22852 22092 23521 22220 23088 22528 23032 22693 22784 22544 22565 22976 22560 22612 22448 22959 22742 22624 22905 22658 23130 22843 22873 22292 23361 22320 22968 21925 23556 22048 23198 22156 23585 22136 23314 22152 23448 22080 23377 22328 23392 22151 23361 22172 23469 22118 23388 22662 23407 22117 23274 22406 23250 22361 23225 22231 22927 22621 23011 22224 22970 22405 23095 22204 23298 22273 23171 22138 23165 22236 23389 22120 23456 21957 23335 21992 23574 21964 23250 21824 23585 21991 23113 22067 23522 22072 22923 22080 23369 22246 22885 22364 23126 22520 22578 22632 22861 22481 22854 22969 22572 22695 22528 23429 22205 22629 22039 23418 22592 22098 23008 22435 23042 22205 22556 22414 23248 21982 23913 21509 22799 21743 23657 22359 22618 23448 21993 22954 21834 23623 21961 22491 22547 22520 23267 22126 23129 22560 22493 22653 22681 23052 22957 23212 22375 23024 22281 23169 22336 22776 22593 22941 22734 22704 23030 22727 22395 22775 22586 22953 22369 23245 22155 23148 21942 23518 22315 23128 22632 22843 22537 22658 22743 22886 22214 23497 22220 23370 21879 23588 22054 23056 22222 23159 22454 22870 22671 23035 22137 23334 22192 23256 22036 23491 22071 23104 22362 22970 22497 22776 22562 23189 22339 23576 21916 22977 22511 22861 22464 22695 22590 23324 21959 23670 22445 23036 22711 23028 22256 23553 21876 23222 21983 23207 22565 22656 22814 22967 22329 23397 22094 22953 22729 22652 22372 23095 22178 13047 17288 19583 19606 19725 20146 20730 19650 21175 43449 27672 25329 23605 23137 23864 22148 23313 22727 22476 23108 22360 23076 23543 21764 24018 22801 22486 18263 19552 20315 22088 20141 21292 21910 20738 21382 36224 24840 24572 22599 23537 23559 22155 24156 22468 22199 23879 22700 22586 23544 22339 23041 22862 3255 19512 21049 21546 22052 21472 22196 22002 21743 22113 29176 23658 24111 23080 23168 23132 23396 22535 23764 22352 23181 22960 22822 22624 23306 22273 23259 15009 21224 21623 22348 21575 22599 21767 22515 22034 22386 25232 23976 22496 23941 22599 23401 22937 23156 22384 23686 22029 23345 22437 23025 22412 22775 22871 21015 21441 23243 22007 22653 22539 22698 21996 23245 21651 24000 22724 23244 22508 22986 22464 23334 21893 23516 22438 22967 22942 22988 22663 23604 21984 23123 22195 23127 22492 22893 22517 23469 22216 23618 22224 23008 22744 22792 22311 23303 22152 23229 22191 23354 22580 22912 22917 23063 22865 23445 22004 23041 22478 22738 22472 22587 22843 23243 22137 23443 22497 23159 22962 22733 22428 23489 21858 23040 21841 22999 23017 21936 23669 22156 22295 23110 21944 23316 21595 23301 22944 22065 23771 22598 22024 24008 21554 22569 22574 22921 23188 21904 23556 23040 21984 24038 21828 22433 23398 21756 22808 21844 23258 23111 22033 23894 22551 22485 23264 22100 22935 22571 22907 22786 22536 22953 22966 22638 23344 22176 22931 22688 22703 22871 22465 22758 23052 22541 23271 22199 23111 22421 22996 22533 22809 23063 22806 22449 22849 22530 23251 22155 23331 22030 23354 22167 23673 22010 23193 22082 23528 22082 23069 22052 23506 22092 23172 21879 23669 22003 23308 21995 23564 21968 23273 22103 23373 22550 23139 22178 22834 22836 23145 22153 23108 21921 23399 22426 22846 22382 23168 22453 23488 21931 23225 22401 22910 22347 23536 21868 23367 22135 22741 22627 23426 21904 23394 22321 23056 22552 23750 22204 22976 22545 23098 21884 23474 22214 22972 22377 23024 21719 23543 22370 22856 22423 23057 21901 23437 22784 22862 22362 23128 22141 23062 22931 22919 22284 23106 22278 22695 22800 23147 22306 23200 22455 22730 22893 22903 22352 23040 22374 22855 22964 22813 22247 23104 22389 22616 22859 22930 22154 23220 21711 22862 22999 22838 22312 22951 22278 22621 23458 22222 22656 22907 21588 23563 23095 21873 23045 22492 21636 23829 22752 21924 23136 22637 21575 23476 23339 21768 23057 22471 21456 23520 23256 21856 22960 22488 21559 23619 22976 21768 22701 22782 21777 23415 23437 21784 23079 22469 21553 23481 23179 21764 23095 22519 21645 23440 23836 21936 22504 22835 22086 22730 23356 22215 23118 22450 22578 22757 23202 22221 23146 22438 22569 22926 22965 22453 23047 22644 22640 23045 22675 22648 22884 22485 22857 23017 22636 22698 22912 22493 22721 22855 22909 22335 23118 22304 22836 22995 22937 22491 23088 22163 22809 22946 22741 22552 23080 22391 22824 22810 22639 22439 22964 22148 23140 22788 22674 22499 22972 22043 23218 22812 22750 22355 23020 22101 23252 22715 22725 22528 22988 22217 23124 22688 22720 22423 23071 21910 23475 22571 22752 22425 23029 21818 57 16039 19343 19322 20424 19629 21374 19788 21030 20186 33503 25751 25071 22880 24064 22801 17273 19977 21747 20523 22059 21092 21661 21744 22240 37504 26200 23640 23719 23263 23392 15936 21232 20771 22589 21620 22241 21796 22218 21433 23111 25260 24058 23160 23668 22614 15421 20561 22521 21674 22284 22199 22894 21745 22795 21912 25808 23253 24248 22425 23555 22457 22128 22094 23348 21698 22997 22200 22871 22119 23536 25031 23704 22676 23304 22160 23724 22434 22813 22792 23184 22037 23573 22838 22808 22731 23089 22140 23608 22615 22774 22602 22997 22176 23532 22904 22762 22589 23080 22178 23306 22973 22728 22567 23008 22213 23177 22910 22915 22364 23172 22203 22901 22946 22872 22437 23108 22505 23017 23088 22745 22657 22983 22162 22869 23330 22436 22698 23015 21979 22994 23397 22314 22348 23105 22016 22432 23758 22470 22022 23280 22234 22018 23770 23191 21531 22979 22444 21959 23056 23776 21553 23242 22307 21920 23271 23441 21555 23175 22311 21947 22855 23832 21698 23109 22568 22275 22484 24015 21870 22425 22828 22242 22266 24053 22247 22524 23017 22512 21621 23712 23044 21818 23104 22400 
22073 21159 21672 21276 21741 21413 21915 21573 22136 21569 22099 21458 21873 21157 21931 21204 21809 21064 21698 21277 22064 21787 22501 22061 22511 21888 22374 21748 22200 21496 21895 21294 21564 21198 21813 21577 22107 21755 21511 20715 22631 22304 20728 22200 21458 21740 21642 22296 21346 21973 21768 21818 21292 22308 21784 21689 21903 21898 21161 22252 22057 21617 21657 22139 21677 21797 22035 22176 21386 22400 21442 21839 22036 22449 21403 22138 21754 22064 21549 22664 21817 21898 21623 22209 21542 22024 22044 22110 21528 22312 21513 21955 22064 22348 21345 22325 21616 21779 21980 22555 21271 22410 21497 21767 22033 22385 21442 22229 21583 22096 21207 22660 21671 21880 21637 22153 21337 22644 21980 21835 21840 22147 21451 22239 22200 21970 21730 22158 21339 21841 22199 22310 21488 22353 22071 21699 22035 22384 21441 22624 21935 21213 21683 23170 21447 21696 22187 21496 21136 23071 22311 21223 22368 21817 20935 22375 23095 21385 21879 22360 21697 21265 22988 22213 21197 22544 21642 21063 22135 22467 21892 21662 22369 21629 21708 22051 22245 21451 22060 21751 21859 21638 22477 21803 1200 8021 10830 11733 13325 13785 13716 14199 14875 14305 36280 29393 26547 24009 24182 23021 23181 22468 23431 22195 22752 22410 22608 21752 22853 22438 22604 21898 22873 21533 22366 22415 22763 21700 22897 21932 22235 22071 23083 21726 22571 21815 22533 21671 23072 21842 22499 21917 22580 21594 22845 22067 22374 21974 22625 21543 22761 22272 22375 21811 22631 21715 22496 22336 22337 21947 22612 21814 22135 22213 22637 21591 22733 21888 22092 22087 22801 21585 22711 21833 22106 21966 22905 21795 22053 22176 22578 21239 23223 22211 21583 22341 21968 21233 23242 21315 20876 21704 21344 20613 22050 22452 20632 21937 21296 20557 22548 21900 20825 22067 21632 20778 22498 22626 21115 21894 21422 21696 21356 22227 21269 21717 21542 21495 21511 22091 21351 21574 21520 21777 21272 22242 21136 21714 21474 21681 21441 22233 21281 21769 21509 21591 21092 22213 21265 21665 21415 21414 21204 22167 21066 21635 21415 21552 20939 22305 21222 21719 21317 21452 21020 22212 21396 21633 21396 21684 21230 22400 21064 21894 21437 22254 20951 22368 21065 21754 21436 21797 21402 22144 21047 22028 21237 21536 21626 22289 21089 22186 21433 21642 21809 12455 8087 13152 13776 15093 15733 16594 15783 16972 16568 41431 30032 27033 24047 24072 22993 22923 22553 23296 22000 23012 22204 22025 22473 23137 21376 22941 22256 21747 23044 22570 20517 21888 20889 20849 22370 21328 20976 21888 20921 21521 22579 21109 21372 21689 20929 21127 22706 21348 21165 21986 21668 21661 22196 21080 21994 21457 21604 21686 22273 21392 21991 21677 21979 21473 22404 21543 22017 21687 21863 21671 22444 21408 22093 21630 21632 21824 22261 21328 22377 21544 21968 22156 22050 21708 22289 21574 22519 22126 21812 21832 22231 21360 22317 21984 21809 21812 22097 21321 22736 21615 21996 21623 22028 21440 22715 21336 22312 21575 21846 21911 22375 21322 22334 21888 22075 22089 22173 21629 22237 21277 22535 21792 21899 21837 22204 21341 22638 21496 21986 21882 21904 21977 22419 21478 22175 21947 21981 22211 21877 21847 22140 21400 22421 22088 21908 21881 22027 21011 23021 22048 21478 22212 21707 21929 23174 21039 22607 21714 21324 22167 22952 20963 22338 21713 21178 22865 22485 21163 22467 21578 21593 23097 21607 21725 21910 21936 21944 22515 21367 22329 21773 21774 22165 22272 21472 22173 21553 22045 22234 21930 21799 16163 16547 18374 18519 18712 19052 19401 18789 19983 19549 24794 23557 23160 21916 23075 22135 22220 22013 22369 21568 22664 22231 22130 21986 22384 21401 22645 22045 21917 21921 22097 21301 22259 22234 22085 21661 22347 21285 22074 22173 22231 21690 22455 21673 21880 22066 22532 21467 22374 21656 21877 21122 22580 21792 21952 21900 22140 21315 22201 22177 21949 21591 22263 21554 21973 21707 22656 21796 21820 21982 21969 21458 22185 22212 21798 21764 22090 21528 21785 22523 22534 21040 22412 21851 21368 22161 23164 21040 21977 21937 21554 21623 23298 21240 22076 22312 21725 21127 23057 22115 21191 22432 22005 21001 22948 22460 21041 22601 21856 21977 21973 22661 21449 22340 21751 21776 22044 22409 21572 22133 21829 21992 21628 22539 21760 21977 21977 22060 21381 22477 22107 21753 21970 22108 21317 22457 22108 21945 21766 22213 21787 22112 22200 22105 21586 22440 21591 22037 22080 22329 21272 22475 21971 21909 22010 22211 21500 22416 21686 21884 22041 22448 21424 22448 21475 21833 21812 22601 21444 22365 21799 21933 21533 22701 21671 22037 21829 22162 21298 22477 21929 21960 21828 22265 21495 22124 22242 22034 21559 22208 21794 16033 18919 19845 19630 20699 20152 20394 20695 21286 20359 24086 22921 23136 21637 22901 22639 21595 22036 22119 21198 22124 23090 21383 21893 22220 21803 21320 22954 21926 21159 22509 21578 21229 23000 21646 21309 22354 21227 21004 22518 22613 20876 22283 21768 21287 22237 22192 21842 21856 22096 21471 22135 22253 21771 21657 22219 21626 21739 21815 22467 21624 21932 21778 22040 21224 22369 22173 21921 21699 22133 21359 21776 21879 22403 21378 22145 21667 22400 21348 22557 21939 21890 21719 22322 21542 21861 21896 22694 21242 22189 21597 22144 21181 22460 22084 21985 21552 22349 22042 21853 21889 22505 21337 22401 21683 22040 21578 22623 21642 21975 21752 22116 21350 22130 22074 22419 21413 22350 21561 21819 21918 22356 21270 22235 21671 22189 21429 22588 21947 21804 21957 21984 21531 22230 22234 21873 21808 22260 21474 21746 22396 22031 21317 22458 21735 21260 22821 22157 21048 22568 21602 21157 22471 22795 20955 22368 21612 21085 22516 22775 20981 22470 21674 21160 22077 23064 21635 21239 22344 21610 21208 22281 22128 21675 22272 21871 21966 22312 21789 21863 22043 21447 22422 22121 21707 21995 22035 21339 22499 21785 21786 21819 19857 20267 21585 20490 21504 20885 21207 21485 21515 23633 23115 21836 22555 22153 22032 21986 21767 21489 22709 21420 22137 21600 22135 21863 22492 21342 22357 21821 22073 21992 21827 21783 22072 21285 22658 21485 22349 21741 21992 21847 22442 21386 22262 21625 22073 21961 21888 21669 22136 21380 22586 21702 22005 21632 22094 21878 22336 21479 22209 21475 22308 21911 21723 21836 22018 21745 22357 21536 22116 21429 22484 21676 22081 21638 21628 22282 21680 22014 21869 20780 22934 21317 22400 21518 21671 22834 21100 22272 21508 21889 22531 21239 22054 21143 23030 21864 22022 21571 21272 22976 21102 22264 21179 22662 21805 21816 21648 21792 21987 21952 21714 21648 22197 21671 21967 21894 21926 22092 21717 21948 21520 22501 21402 22236 21543 22150 21773 22027 21804 21831 22122 21825 21736 21818 21960 21908 21712 22016 21668 22473 21443 22071 21344 22705 21272 22203 21214 22591 21223 22232 21464 22100 21840 22023 21665 21777 22095 21852 21751 22036 22039 22128 21618 22164 21405 22641 21345 22316 21243 22593 21421 22355 21344 22355 21595 22276 21467 22260 22019 21940 21634 21903 21931 21960 21822 21980 21807 22240 21611 22024 21364 22530 21394 22048 21416 22466 21518 22293 21607 22390 21678 22259 21589 22026 22039 21997 21625 21664 22597 21650 21807 21346 22759 21257 21735 21039 22891 21231 21867 21221 22887 21022 21878 20952 22917 21048 22079 21003 22630 21529 22262 21491 22701 21112 22311 21136 22971 20905 22330 21476 22494 21370 22065 21365 22451 21580 21972 21530 22296 21785 21895 21939 21943 21883 22068 21927 21975 21704 22222 22002 21937 21819 21767 22176 21895 21834 21772 22074 21820 21568 21973 21943 22144 21552 21924 21715 22288 21368 22585 21429 22379 21280 22669 21314 22242 21113 22705 21237 22176 21333 22446 21644 21816 22017 22072 21801 21876 22081 22117 21389 22256 21505 22384 21353 22515 21165 22057 21409 22401 21736 21892 21997 22057 21760 21939 22069 22033 21429 22068 21787 22444 21607 22586 21415 22133 21357 22425 21801 21723 22032 21870 21794 21908 22185 21770 21650 22024 21688 22337 21385 22599 21456 22039 21625 22162 22016 21637 22675 21383 21880 21447 22026 22352 21440 22942 20816 22152 21040 22613 22077 21421 22912 20992 21794 21475 22464 21768 21473 23018 20780 22027 21319 21927 22263 21239 22848 21434 21542 22984 20848 21554 22245 21478 22298 21392 22214 21939 21589 22208 22135 21660 22336 21617 21875 22096 21765 21902 21719 21884 22251 21311 22419 21751 21851 22177 21868 21983 22513 21297 22049 3650 9904 11428 12940 13145 14301 13827 14996 14872 41399 31480 27457 24710 24775 22977 23303 22902 22663 22103 22976 21767 22714 21730 22577 22181 22068 60 11264 13844 16472 16114 17178 17520 17756 17305 18709 33781 28023 25032 24188 23281 23116 22360 23021 21811 23100 22137 22492 22397 22288 21216 22746 21467 11954 14940 17209 17736 19167 18614 19621 18987 19712 19620 28752 24839 24094 22551 23188 22505 22293 22322 22556 21771 22797 21933 22257 22356 21920 21704 22507 16857 19155 19747 19995 19961 20833 20019 20786 20038 20819 24497 22305 22584 21968 20755 22532 21363 21063 22505 20823 21072 22293 20448 21441 21874 21760 21973 19656 21486 21365 20165 22116 20941 20819 22230 20487 22157 22939 20757 21607 21929 21746 22666 21779 22361 22778 21355 22616 22325 21517 22784 21976 22155 22456 22243 21975 22236 21915 22624 21755 22553 21845 21992 22426 22136 21572 22280 21494 21892 21953 22046 21739 21783 22115 22248 21291 22464 21663 22395 22017 21801 21670 22268 21584 22469 21378 22255 21845 21772 22149 22272 21559 22641 21633 22625 22057 21886 21621 22157 21553 22340 21358 22688 21308 22085 21783 22143 21549 22246 21735 22317 21318 22587 21669 21943 22133 21804 21733 22128 21560 22414 21200 22603 21740 22001 22119 21995 20892 22697 21521 22386 21286 22400 21682 22096 22311 22093 21617 22569 21232 22144 21558 22185 21563 21783 22009 22219 21692 22661 21319 22261 21637 22003 21824 21665 22047 22296 21775 22372 21459 22148 21489 22507 21783 21912 21989 21753 21773 21785 22100 22065 21588 22019 21899 22251 21114 22312 21574 22324 21474 22555 21569 22275 21281 22177 22199 21965 21553 21643 22365 21687 21678 21172 23017 21018 22215 21367 22531 21841 21488 22306 21316 22523 22194 21184 22278 21543 21661 23146 20940 22364 21671 21303 22105 23008 20864 22241 21628 21099 22660 22386 20952 22531 21600 21111 21970 23014 20967 21993 22307 21537 22021 22246 22035 21568 22241 21545 21928 22220 21989 21654 22115 21001 21625 22245 22224 21448 22148 21725 21685 21747 22495 21466 22256 21831 21885 21824 22521 21561 21909 21757 21984 21496 22474 21480 21905 21708 21979 21682 22455 21449 22199 21665 21904 21538 22600 21574 22038 21799 22110 21319 22504 21477 22083 21596 22002 21905 22584 21396 22349 21588 21731 21985 22272 21424 22366 21848 21910 21991 22235 21378 22375 21588 21964 21959 22308 21260 22290 21555 21843 21955 22382 21405 22348 22045 21860 22083 22231 21316 22354 21499 21795 21930 22417 21280 22431 21440 21965 21913 22248 21322 22469 20976 21927 22055 22408 21357 22311 21458 21814 21807 22400 21302 22274 21615 21723 21980 22308 21377 22443 21265 22089 22024 22226 21424 22436 21637 22176 22026 21956 21579 22169 21260 22358 22114 21805 21704 22086 21248 22327 22055 21814 21662 22072 21508 22092 22150 21991 21752 22143 21409 22345 21948 21824 21671 22080 21504 22140 22083 21829 21864 22085 21421 22454 21937 21697 21867 22127 21386 22389 21996 21771 21863 21991 21244 22344 22161 21640 21850 21967 21248 22541 22471 21552 21904 21910 21126 22653 22357 21251 22197 21789 20922 23100 21816 210 8469 11232 12032 15200 13649 15089 14915 14914 15705 27276 22542 23503 22123 21560 23278 15000 15048 17735 17275 17380 19265 18381 17950 19059 27547 25219 25629 23837 23191 23436 16029 19196 20224 19049 20460 20052 19544 21554 19789 26125 25319 23616 22647 24172 21994 18247 19168 19301 20930 20784 20461 20827 20860 20275 21330 24352 23064 22722 22754 21976 20029 20873 20901 21268 21376 20873 21588 21569 21190 21397 23419 22408 22512 22579 21969 21888 22247 21860 21772 22327 22240 21533 22359 21682 21737 22206 22202 21574 22361 21526 21820 22194 22117 21590 22295 21718 21751 22058 22331 21409 22317 21620 21864 22037 22380 21289 22161 21735 22001 21664 22631 21426 22199 21548 21762 21601 22411 21169 22135 21517 21750 21859 22380 21201 22173 21433 21704 21889 22417 21243 22406 21629 21855 21616 22481 21289 22183 21407 21856 21531 22663 21245 22009 21559 21943 21016 22331 21591 21690 21675 21929 21171 22432 21627 21815 21696 21991 21260 22503 21697 21768 21696 21999 21205 22370 21877 21735 21657 22116 21291 22224 21773 21655 21576 22064 21253 22144 21932 22039 21368 22211 21890 21784 21910 
22219 21601 21515 21643 21520 21661 21591 21553 21417 21700 21900 22146 22141 22312 22200 22266 21940 21876 21601 21515 21527 21414 21424 21765 21753 21967 21907 21977 21944 22010 21788 21717 21682 21801 21390 21632 21355 21574 21719 22176 22011 22253 22043 22130 21516 21671 21491 21653 21623 22053 21837 22231 21776 21939 21641 21864 21784 21712 21356 21652 21346 21908 21914 22312 22018 22383 21970 22301 21652 21738 21301 21655 21434 22114 21745 21464 21845 22732 20837 21912 22106 21595 20759 22567 22419 20944 21744 21895 21006 21974 22725 21036 21230 22277 21292 21307 22784 21489 21056 22309 21348 21149 22734 21972 20911 22246 21735 21337 22255 21984 21495 21819 21912 21624 21656 22264 21735 21610 21957 21624 21487 21906 22093 21376 22182 21526 21499 21870 22316 21329 21895 21735 21820 21537 22362 21337 21866 21729 21115 21319 22373 21516 21606 21730 21949 21383 22103 21915 21788 21504 22135 21707 21739 22045 21975 21285 22203 21426 21789 21649 22391 21321 22051 21614 21966 21398 22540 21474 21856 21712 21975 21297 21876 21953 21975 21312 22277 21321 21547 21876 22423 21205 22003 21560 12776 16512 18989 18419 19096 19568 19773 19303 20279 42836 25463 23062 22913 21834 21868 21938 22409 21202 22095 21629 21651 20868 22693 22120 21032 21965 21863 21047 21874 22695 21450 21305 22268 21376 21141 22769 21765 20578 22327 21621 21185 22066 22855 20706 21773 21843 21595 21159 22990 21730 21514 22072 21596 21506 22113 22161 21473 21991 21617 21495 22018 22105 21342 21969 21657 21596 21668 22304 21464 21808 21870 21849 21317 22371 21729 21632 21797 21908 21252 22291 21642 21559 21870 21962 21342 21890 22016 21787 21545 22060 21332 22016 21942 21716 21627 22121 21475 22136 21949 21936 21408 22215 21909 21833 21961 21949 21347 22211 21468 22034 21959 21687 21455 22244 21591 21586 21895 22211 21303 22279 21313 21763 21800 22316 21171 22215 21536 21915 21743 22312 21104 22154 21509 21673 21728 22363 21283 22151 21557 21717 21738 22473 21346 22037 21531 21825 21532 22564 21073 22250 21589 21458 21464 23024 20984 21717 21892 21538 21563 22981 20864 21885 21760 21207 21991 22827 20680 22184 21484 21130 21683 23047 21026 21936 21716 21429 22070 22538 21320 21927 21808 21301 22418 21623 21660 21824 21665 21448 22235 21706 21760 8917 18381 19580 21021 20564 20815 21000 20620 20524 21440 26776 23197 22485 22164 21336 22311 21908 21603 21808 21872 21272 22387 21683 21892 21735 22385 21489 22471 21234 22003 21656 21963 21603 22429 21297 22170 21536 21783 21834 22346 21244 22272 21465 21744 21832 22267 21191 22214 21556 21692 21664 22368 21179 22165 21376 21575 21779 22221 21120 22279 21453 21768 21688 22423 21225 22155 21412 21595 21777 22226 21314 22135 21463 21649 22021 21936 21386 22120 21483 21864 21959 21828 21709 21871 21290 22275 22088 21136 22057 21688 20808 23074 22225 20800 22145 21458 20842 23031 21333 21559 21804 21165 22134 22616 20807 22064 21531 21064 22280 22215 20897 22302 21200 21677 22319 21402 22062 21643 21579 22089 21883 21434 21968 21753 21723 22293 21548 21853 21800 21431 22155 21925 21556 21755 21568 21677 22347 21367 22138 21472 21533 21909 22125 21433 22080 21622 21740 22028 21888 21577 21978 21347 22109 21745 21692 21716 21925 21364 22432 21674 21725 21719 21878 21241 22469 21392 22156 21554 21977 21533 22355 21255 22204 21477 21744 21832 22088 21157 22272 21449 21866 21956 21824 21281 22216 21319 22208 21967 21715 21743 21963 21218 18721 20473 20967 21242 21371 20855 21957 21131 21375 32961 23857 21911 22684 21390 21939 21771 21825 20832 22895 21877 21105 22116 21536 20859 23076 21663 21114 22139 21574 20823 22903 22112 20949 21921 21879 20940 22043 22738 21144 21610 22086 21353 21528 22917 21712 21475 21909 21719 21339 22091 22177 21742 21612 22031 21659 21473 22148 21862 21443 22084 21640 21772 21307 22253 21892 21670 21789 21902 21742 21633 22040 22232 21240 22092 21515 21669 21859 22208 21322 21952 21686 22067 21304 22467 21580 21692 21768 21963 21209 22358 21848 21750 21781 21908 21228 22281 21908 21833 21552 22152 21321 22025 21907 21843 21402 22129 21696 21677 21853 22100 21137 22255 21324 21813 21810 22166 21091 22289 21385 21669 21792 22426 21201 22020 21626 21907 21484 22386 21456 21883 21760 21948 21265 22423 21469 21740 21896 21866 21288 22251 22134 21575 21724 21984 21173 21809 22693 21080 21829 22309 21240 21521 22862 21461 21392 22115 21216 21569 22832 21418 21096 22277 21177 21387 22795 21672 20619 22311 21387 21200 21684 22810 21473 21923 21927 21569 21652 22305 21776 21475 22033 21655 21556 22165 22076 21380 21960 21636 21892 21820 22340 15486 20818 21233 21516 21260 22135 21367 21467 21589 21760 23696 22494 22151 21783 21549 22293 21457 21681 21959 22215 21209 22200 21399 21796 21886 22457 21303 22087 21584 21872 21675 22429 21242 22129 21519 21913 21665 22487 21336 21920 21552 21923 21176 22471 21541 21664 21634 21924 21035 22407 21660 21771 21613 21989 21431 21771 22009 22173 21229 22170 21550 21900 21530 22437 21668 21725 21714 21869 21225 22247 22060 22057 21326 22211 21429 21709 21656 22477 21369 21436 22041 21736 20788 21781 22748 22045 20721 22424 21429 21145 21853 23107 21351 21005 22039 21796 21157 21880 22773 21621 20903 22343 21385 20960 22263 22823 20690 22044 21904 21698 21761 22120 22277 21467 21851 21828 21465 21514 22320 21696 21606 21788 21681 21392 22240 22018 21536 21656 21977 21707 21699 22053 22255 21320 22188 21508 21611 21704 22371 21280 22148 21479 21792 21553 22405 21255 22056 21653 21921 21352 22436 21459 21771 21687 21971 21288 22457 21601 21876 21751 21834 21300 22524 21663 21780 21792 22080 21521 21897 21977 21706 21562 22000 21312 22217 21838 21700 21664 21920 21039 22482 21517 21820 21799 21927 21168 22361 21557 21927 21574 21958 21569 21396 20973 22026 21341 21532 21899 21690 21548 21925 24453 22715 21991 21402 21931 21811 21164 23031 20869 22272 21557 21400 22048 22672 20829 22439 21319 21552 22789 20848 22108 21561 20871 23067 21065 21739 21635 21164 22052 22689 20695 22410 21321 21588 22259 21319 22107 21580 21531 22215 21974 21605 21987 21586 22000 22008 21555 21728 21801 21866 22121 21517 22085 21693 21984 22039 21459 21829 21841 21848 22059 21605 22002 21255 22353 21422 21911 21488 21671 22007 22057 21494 21831 21252 22488 21232 22328 21384 22056 21867 21696 21589 21879 21851 21985 21559 22109 21104 22536 21201 22193 21328 22240 21572 22011 21568 21713 22054 21691 21638 21945 21821 21990 21621 22034 21496 22440 21267 22059 21274 22550 21226 22308 21411 22298 21865 21756 21634 21701 22080 21705 21905 21760 21901 21984 21725 21944 21329 22572 21104 22162 21244 22752 21351 22139 21573 22137 21734 21735 21504 20969 22799 20871 22185 21403 22532 21368 22076 21682 21656 22528 21214 22098 20791 23042 20727 22477 21314 22313 21548 21869 21480 21607 22054 21560 21877 21283 22295 21350 22114 21767 22002 21877 21792 21720 21700 22063 21617 21817 21584 22052 21673 21851 21777 21937 21912 21648 21765 21510 22151 21547 22003 21279 22519 21205 22128 21163 22379 21202 22144 21422 22354 21303 22236 21436 22432 21232 22321 21448 22436 21304 22165 21531 22343 21328 22301 21607 22235 21467 22093 21460 21909 21618 22023 21432 22186 21497 22243 21575 22368 21319 22242 21656 22514 21223 22320 21270 22626 21212 22209 21263 22528 21176 22085 21252 22452 21411 21911 21225 22296 21450 21863 21552 22153 21674 21900 21761 21969 21792 21843 21917 21621 21696 21564 22139 21532 21639 21273 22394 21436 21482 21591 21909 22185 21149 22669 21019 22333 21456 22757 20788 22450 20882 22852 21175 21748 21635 21641 22144 21419 22857 20918 21591 21615 22557 21686 20655 22691 20764 22137 21428 22050 21723 21643 22053 21630 22115 21592 22244 21431 21848 21424 22123 21734 22241 22028 21487 21797 21558 21914 21789 21576 22308 21807 22007 21404 22369 21344 21972 21386 21984 21856 21891 22016 21597 21547 21860 21564 22150 21504 22441 21201 21972 21340 22308 21600 22135 21892 21730 21580 21831 21737 22197 21329 22411 21187 22153 21072 22384 21609 21914 21834 21681 21475 22052 21393 22253 21197 22416 21715 21874 21992 21781 21367 22227 21177 22160 21349 21844 21588 21703 21637 22327 21264 22578 21269 21936 21889 21675 21638 21808 21517 22155 21174 22244 21696 21771 22007 21973 21468 22451 16435 19349 19871 19865 19947 20675 19960 20744 19959 32234 24397 22215 22518 22352 21163 23104 21399 21419 22808 21080 21357 22592 20534 22021 21676 21303 7607 18420 20346 21515 20092 22199 21208 20634 22144 21248 27158 24528 21237 21786 22579 20967 22016 21057 21880 22423 21164 22168 22113 21287 22307 21805 21716 15339 20248 20909 21671 21072 21331 21684 21124 21351 21841 24444 22608 22036 21760 21739 21737 21648 22033 21329 22214 21841 21647 22016 21936 21519 22448 21492 19061 21312 21385 21442 22197 21240 21472 21786 21512 35128 23639 21648 22229 21393 21991 21794 21751 21761 22165 21313 22461 21484 21896 21974 21898 21519 22007 20242 21739 21205 21880 21605 21536 21797 22094 21318 25975 22121 22193 21959 21863 21490 22406 21211 21940 21656 21837 21665 21725 21475 22325 21153 22407 21573 21813 21939 21809 21353 22293 21235 22196 21288 22154 21760 21707 21923 22151 21574 22562 21269 21873 21691 21744 21648 21750 21604 22167 21249 22427 21618 21845 21961 21790 21553 22138 21269 21968 21504 21863 21734 21569 21881 22251 21175 22886 21184 21778 22324 21061 21708 21321 22105 22202 21168 23028 20679 21651 22115 21056 22054 21369 21408 22568 20744 22679 21849 21288 22539 20809 21552 21804 21159 22352 20869 22289 22141 21235 22764 21206 21530 22200 20867 22425 20869 21909 22169 21328 22384 21664 21626 22221 21482 21632 21883 21638 22097 21293 22237 21769 21852 22221 21450 21760 22008 21570 21992 21299 22367 21497 22119 22021 21637 21786 21544 21906 21868 21976 22151 21366 22176 21504 22540 21351 22068 21206 22369 21353 21932 21451 22228 21411 21781 21496 22321 21367 22054 21091 22370 21185 22020 21077 22441 21200 22206 21497 22112 21612 21874 21600 21751 21814 22290 21378 22103 21352 21946 21819 21687 21777 21831 21225 22528 21687 21856 21745 22035 21219 22528 21402 21947 21516 22033 21336 22467 21528 21728 21650 21911 21206 22352 21924 21697 21808 22059 21323 22312 21831 21749 21713 22087 21277 22020 21848 21880 21475 22254 21146 21779 21900 22112 21186 22205 21498 21561 21943 22224 21273 22165 21501 21850 21696 22314 21229 22130 21473 21652 21806 22318 21274 22262 21504 21605 21874 22215 21364 22018 21512 21851 21728 22395 21242 22151 21548 21576 21830 22228 21240 22223 21335 21127 22599 21905 21092 22263 21200 21633 22728 21162 21508 22059 21205 21993 22763 21421 20915 22279 21347 21396 22761 21259 21388 22096 21396 21569 22829 21090 21655 22116 21308 21712 22739 21895 20968 22337 21371 21230 22760 21319 21305 22149 21317 21623 22850 21325 21212 22219 21243 21014 22624 22115 20780 22225 21831 21368 22231 21493 21793 21820 21860 21666 22435 21408 21872 21709 21716 21879 22150 21380 21943 21721 21575 22149 22042 21383 22039 21526 21412 22019 21906 21432 22032 21600 21484 21991 22159 21317 22069 21495 21603 22008 22056 21500 22124 21543 21586 22058 22144 21448 22130 21655 21714 22067 21956 21393 22208 20807 21647 22048 21881 21539 22086 21859 21750 22060 22032 21456 22083 21257 21884 22061 21914 21376 22248 21510 21646 22027 22069 21415 22120 21588 21812 22008 21786 21549 21976 11530 19148 19753 20146 20167 20652 19931 21237 20572 20631 27525 24111 21910 22760 21532 5595 18729 19936 20503 21733 20800 21344 20971 21254 21069 28940 22684 22716 21568 21732 21850 18971 20099 21693 20946 21769 21633 21473 21335 21719 30000 23660 22351 21850 21719 21888 17655 21479 21047 21632 21485 21830 21330 22277 21416 21521 23256 22317 21287 22505 21528 18327 21038 21736 21004 22340 21570 21592 21632 21870 21067 23597 22016 21889 21755 21993 21337 22278 22052 21852 21511 22078 21571 21847 22072 21781 21581 22062 21367 21931 21972 21735 21704 22032 21417 21760 22028 22009 21405 22132 20903 21607 22021 22161 21366 22146 20829 21708 21849 22287 21184 22204 21545 21608 21994 22209 21216 22189 21527 21659 22111 22012 21250 22166 21495 21317 22390 22069 21004 22299 21627 21326 22277 22406 20746 22386 21416 21142 22295 22544 20691 22224 21687 21197 21380 22999 21680 21265 22123 21687 21036 23162 21240 21572 22032 21642 21213 23040 21204 21680 21952 21545 20896 22932 21727 20869 22266 21579 20823 22744 22336 20915 22214 21604 20796 22514 22404 20891 21798 22009 21283 21841 22743 21269 21464 
41222 34216 32889 34401 32688 34620 33924 33223 41897 35302 37268 39859 40298 41779 40776 41623 37969 37160 34003 32874 32997 41827 42216 36032 35824 38289 37472 38330 37888 38742 36185 35383 34819 36121 41824 34364 41490 33916 35381 40065 38935 41475 39193 39936 33123 34749 42816 34876 34368 38827 36869 41071 35937 37780 34496 36854 35876 35138 41450 34701 41179 37512 37536 41632 38637 42808 38346 41750 34732 35584 40854 34911 42164 39827 35808 40200 36738 40013 33921 37486 36779 38937 42071 34761 41868 40270 37814 42992 38355 43928 37544 39240 40947 34644 39393 39013 35824 40817 35937 38056 42426 38011 41128 35554 41314 39645 38419 43088 37669 40960 42316 36416 37414 34332 34405 41185 35937 34125 37904 34345 42930 37553 39609 41512 40608 33280 42932 37440 41800 41351 37544 35776 36459 33076 42085 41570 37239 35492 39241 41260 42641 33267 33941 35303 38016 41817 39872 37767 36148 32517 39876 35481 35702 38938 38458 40765 40937 42321 36444 34410 42615 41385 39132 34464 38136 41883 33840 42464 36955 35146 38272 40825 37241 37896 38400 40859 41462 41346 33689 36936 42944 40276 38732 33568 32054 29952 36586 40953 38067 32818 35146 40161 40809 46752 44890 39784 37849 36688 37072 37703 42721 40117 39802 34718 34480 36026 35367 39656 38081 38256 37190 38368 37072 35573 42384 41184 41672 41633 39451 36424 35801 32936 41736 34603 39562 39127 37441 34524 35846 36736 34066 39393 38949 35584 32823 38944 34112 32531 39386 40185 42784 38796 34304 42933 38679 39717 41591 38278 34744 33916 34528 41280 42758 36407 37184 36825 41036 42576 35744 34084 36066 37312 40197 41582 34676 33484 37036 38092 41540 37275 38344 36245 33296 38924 41274 38483 37947 35352 34422 39712 42904 40152 38228 37693 41792 41104 37590 36652 38065 38144 41447 40949 42894 38871 38243 35204 42587 41304 34257 33616 37204 40743 41192 41579 41150 35938 36103 41731 39845 41009 33248 37460 35952 41564 38939 40137 33030 34690 35236 42308 40907 40289 33703 35260 35575 43333 41617 38984 33381 36293 33123 33607 38295 41251 34151 42296 42777 39272 37712 35425 37090 33146 33472 38485 36080 37338 35574 40064 38647 37092 34180 40192 43061 39382 35080 39250 37985 37627 35356 42166 39395 33689 40833 37922 36218 40853 42871 34760 34596 36226 34643 42185 41378 35468 35467 31788 40468 33284 37853 32873 35720 37488 33627 32232 41848 38096 41088 43792 40429 41382 41988 37592 34144 36016 36920 40423 42737 35278 37046 35738 42348 43072 43814 40567 38740 34650 38096 34113 42892 41030 40432 33231 35952 36560 42075 40712 41177 42887 35861 36462 41512 40113 40896 33627 34996 34421 42044 40036 40354 41570 34039 35831 40929 38957 41476 42843 35994 34921 42830 40528 40328 42134 34343 35728 40764 41094 40257 42889 34721 38485 37677 41728 39923 43099 37187 38161 36525 35383 37241 40775 41380 39527 39095 39129 35088 35456 39398 40961 35513 39792 42586 36299 39328 41401 33817 36176 39618 40049 34675 35626 38837 33371 38157 41234 41111 36686 41669 39989 35130 41911 42147 39428 34688 33767 39254 37496 42308 38212 35958 35517 41400 33624 36843 36156 42326 40404 37828 33440 35846 33435 34834 42093 42010 40240 42688 33590 37296 39997 42432 39350 34480 35586 38606 37082 33740 38151 41488 39943 35858 35072 35201 37596 41537 42983 35173 35526 35456 37156 40432 43544 41931 40312 33537 38152 33321 42024 40643 40857 43010 35882 36471 39288 39516 41133 42656 37281 37952 36385 40512 40874 41387 40690 38528 35441 35867 38153 40105 33881 42537 37768 40503 41994 36550 38010 39274 42056 32818 37643 37578 35360 41783 38023 36018 36400 35728 37860 37280 38844 39721 33173 36210 39463 35078 38934 40231 33865 35780 37860 39561 37344 37504 37360 37162 38926 35999 39168 34261 39248 41608 33220 37691 35214 42613 37704 35584 41337 39712 40400 36000 34164 38784 34856 42496 40136 37152 42339 39495 34465 35765 40995 41557 37352 34823 36097 37424 35828 34176 38596 40999 40512 39616 33169 34617 36833 40515 41282 37942 35084 39059 40913 43520 34144 34976 35634 38153 40097 42362 37004 35833 35931 37329 40286 41456 37560 36685 33219 39792 41272 38801 37511 36800 41867 40039 35062 34914 36906 39451 39210 41576 41392 36610 36248 40192 38912 41402 41945 35045 35846 42818 40130 38600 34496 37304 42859 42760 42645 37614 35568 37902 40387 43109 43136 35990 37168 37062 40644 41488 40192 33969 35361 38052 39703 36360 35431 38476 36624 41672 40562 33080 37244 42616 41846 39965 40076 33674 36616 42091 38937 41379 39941 41942 36808 34785 33464 41576 42071 39975 35034 36598 42602 37846 37824 33619 34311 41378 35954 42669 38896 34823 33290 40029 39434 41658 38164 34344 37016 36496 41900 31408 35397 40168 33095 40179 40228 41936 43014 34197 35425 35878 43673 40422 36292 33458 41296 42674 35139 38047 40960 40229 40689 42188 36312 37377 43311 41320 39648 33804 36829 34939 42936 40717 39968 33360 37360 34651 43556 41539 37577 33297 37472 39585 43600 33649 34403 34096 37416 38213 42778 35000 35867 34280 38309 42418 36191 38656 40491 40560 40416 33698 37194 33129 42816 34985 35512 35192 37125 40273 41413 39297 39165 41338 40932 42472 35677 34475 43428 42050 42576 39105 35685 35248 35896 36090 38986 34784 42624 42560 39569 37095 39962 41737 38017 38944 36208 39410 37222 36490 34353 36635 42122 41984 37399 41478 37169 34296 38737 37292 35052 35541 39632 41408 42987 37223 36498 42688 33178 41437 35151 34043 35957 34839 41460 41101 38624 33122 34340 38178 35384 35079 38896 41599 41223 40695 32942 34104 34980 42295 40687 40055 43065 36244 33305 42442 40676 39079 34725 37441 41380 43139 42893 36220 35112 38129 40675 43466 34320 36951 35952 36628 40739 44232 35298 35840 35872 39060 33042 37099 38292 35318 33480 38229 40864 40989 36983 35092 34451 37303 38348 43472 33416 36363 36280 37744 39412 42388 33811 37608 33730 37873 33573 41558 37844 38666 41560 33414 37258 35101 33284 37495 44288 36154 38532 41984 38048 36416 39483 39488 36391 40948 33738 41624 38897 35092 35909 43072 41461 33447 36270 35923 39589 33726 36213 39552 38592 35828 34322 39411 38956 35408 34480 42540 41443 34004 41198 41364 39936 33947 33088 40686 38408 34196 38272 33817 38222 38647 33546 35208 36173 36996 39831 33192 39181 35337 38080 38963 42662 36833 36650 36704 39154 34212 38372 40484 42248 42534 37799 42760 35189 38663 39142 43052 36992 40171 43680 40448 41977 41882 39127 37289 34944 33824 37184 36950 38304 33696 39641 38855 33520 39696 40576 41205 41077 33807 38637 33536 35101 38900 35283 34311 37797 36654 38425 34411 38529 42965 43274 40756 39347 40673 33901 40097 41697 42277 41754 37284 35945 34196 35072 39007 35352 37237 35564 37376 38198 35680 37751 41132 34234 38571 40151 40661 36141 41544 40322 33842 39836 35783 35645 32545 37285 36752 36363 40443 42204 33618 41440 39470 34965 34426 33092 39981 39558 35680 39008 35077 43456 41208 41898 33680 37021 42732 34496 38891 33552 37066 40649 41770 41635 39840 36016 38432 37277 35955 35328 34997 39224 34295 36362 33638 38713 34958 36864 35864 37654 37444 34347 35687 32752 39936 33600 38464 40881 44282 40336 39873 39754 42720 40113 39899 42422 42329 41288 41262 42568 43027 40427 41876 42605 43188 41153 40395 33445 41938 41255 41874 34496 40997 42990 39827 42656 37682 34257 38547 42288 40674 43248 41402 34032 41988 41420 41216 34745 43643 40620 41789 40744 34789 40000 40760 40804 33416 39414 39476 40306 43288 42321 37803 40288 41577 42661 37380 33269 39914 34990 37260 35645 38032 35993 36708 37656 34380 34830 33507 39960 33325 34332 40408 42854 42612 43155 34304 37392 40452 39637 35328 37939 42093 42569 36487 35328 42971 36588 37095 39732 35873 34266 34334 39609 42352 37514 36872 34056 34292 33805 34835 34201 35236 35047 39936 42280 39077 35683 34508 38860 34661 39612 33997 40908 42540 36996 41960 40168 35752 40865 38840 43201 36492 33504 37363 36216 33608 41384 36729 38726 42040 42508 41460 38342 41760 38404 36800 37207 38326 34190 33332 36704 33622 39832 32729 42832 40128 38275 41386 41794 34067 39920 37251 35488 33737 36533 35686 40526 41324 43008 40021 40228 38478 42449 34427 37440 36644 34852 42624 39104 41837 41592 40240 42752 35634 37024 38376 36069 41729 41132 39904 40106 41595 36900 33815 35155 34309 41836 40472 34177 40359 37768 37136 34990 34304 36021 33025 39992 39781 41186 35128 35875 38696 38289 42744 43392 29940 40201 36596 36216 37268 34168 37157 34760 37333 45672 44274 41218 44208 42299 39875 39878 42092 42496 36826 38504 41746 34265 32416 38392 34944 40933 28996 40448 41568 33248 38595 40808 40096 33846 39617 40128 42244 45154 40771 36247 34059 37416 38360 38295 37243 42947 39813 40309 39757 40965 41834 36612 35316 39377 40199 37024 34925 38229 41281 35106 38841 41672 36845 44324 34652 38563 35620 35735 35606 34291 38520 41172 40974 36819 34720 38225 37640 33224 42752 43143 37920 40840 41891 42450 40871 40512 42740 36304 32723 35483 35516 34272 40853 41873 38784 36144 35899 35624 40128 41084 43653 43201 37504 38256 37360 33220 38545 40096 35956 39936 37307 34148 32869 36038 39488 41179 40192 39936 40603 38288 37154 42842 42896 40451 37936 34566 36701 34663 35502 42665 42137 39552 42883 33970 36346 37792 36308 41472 41671 40592 40672 40812 40255 35677 35330 37555 40128 33829 33600 40322 37215 35201 35502 34272 35686 33966 40176 40307 43173 34481 36711 38072 36236 33344 39824 40648 38151 32632 36928 35618 33465 37125 41315 39961 37760 39557 35972 41688 38592 35408 41008 39837 40770 39587 39253 34432 34448 39568 38256 39065 41778 42054 34129 34615 35251 36744 40672 33828 35538 33196 36085 39536 42097 36482 41328 40352 40528 36525 39968 33314 40348 36394 42864 36516 37459 40285 41164 42576 34796 34368 40832 43019 34425 37244 34409 39302 41024 41387 36033 36842 40960 42645 35804 38512 33626 38229 40915 42749 43322 40097 38724 34476 35946 33181 37138 37076 38116 40166 41808 40377 32768 33351 41335 39388 40101 42438 41760 37978 42592 41141 42208 36260 42856 42013 42006 39234 38857 42371 39896 38608 38688 43159 40032 40951 43246 39754 34400 36909 33885 35825 36336 41306 41687 39900 41559 38087 36664 35127 35767 36664 40208 33382 34992 36635 35659 38701 40212 33380 41728 38214 33028 38467 41232 43543 33381 35212 34345 37473 40012 42088 37792 35094 36064 39127 41334 41800 36938 35843 35208 39402 40833 38626 36830 37158 42722 41640 39579 36064 37303 39530 39760 40940 43245 33898 37840 40759 40736 40388 43376 37132 34939 41624 40623 39964 42800 34773 36306 41846 40784 41533 32839 33939 36896 40891 41730 38632 32897 36778 35341 42706 40721 40288 33584 33483 36407 40844 40528 41248 41600 39351 34566 37220 38669 41571 39973 34354 35668 39443 32837 38986 40116 38584 36521 42250 37049 41400 41640 41946 36555 40468 41888 39545 41864 33757 36903 38656 34773 39562 41124 35320 35924 37340 37379 41904 42052 40608 36372 41160 41130 40224 41227 34640 36957 41287 40265 41099 40784 37984 34531 39632 35431 40739 36864 41568 41296 43216 36334 36497 36864 34631 42862 42076 37165 35440 35248 37219 40027 41690 38170 35544 33736 39848 38987 41858 39127 33207 41737 38752 37402 42183 38760 33973 42707 38774 40429 41224 39386 43218 34406 38451 39015 43157 40132 33589 33601 38870 39855 42472 40055 34882 35158 39064 38023 41737 40750 36032 34658 38601 37344 33257 39193 36996 35826 39028 38634 42386 39569 40575 37443 39225 37632 41399 41305 33099 34407 38624 39296 42260 39948 33950 36137 38551 36141 33440 38032 29584 38221 35033 39063 39650 34082 36960 40374 33223 33688 45570 41228 37617 36248 33158 27440 33549 36872 32173 35408 35280 41068 37804 40353 38720 40545 35504 35660 33387 35333 36626 36823 38662 35319 37025 35816 34201 42464 41617 35776 41671 36023 42316 37079 35520 36952 33005 42649 38615 34197 42817 36831 41071 41473 42240 33204 41347 42086 41052 44012 33396 39812 38355 35634 37635 41941 33808 33702 33957 37069 38553 35192 38256 37165 36009 38458 41392 41465 39078 36999 32956 39220 33757 36745 39131 36106 33863 39054 41873 38020 38179 35801 35080 38448 42180 35755 38625 38778 42149 40083 37046 34235 38460 40144 41786 40081 36304 35272 36768 41586 39751 40832 33569 33916 38329 40690 40112 40750 33410 34596 39763 38864 40225 40360 43282 41364 42827 39507 37824 41674 34740 41115 41447 42880 35100 42364 42279 39488 41690 33706 34254 40545 35336 39943 41656 39168 34913 40231 40088 35264 38016 40688 40544 33733 38400 34503 40059 39096 40016 34880 37703 33395 36225 37908 35821 36198 41367 34088 35798 35898 41744 37013 40778 34216 35409 43655 42871 36912 36179 38684 40748 36784 36164 40488 42672 
22762 22832 23382 23544 23716 23792 23880 23803 23983 23620 23728 23478 23184 23580 23588 23315 23393 23520 23889 23819 24151 23958 24112 24069 23952 23706 23665 23479 23530 23369 23433 23364 23747 23574 24023 23796 23873 23492 23686 23368 23702 23462 23569 23251 23767 23802 24113 24033 24031 23716 23904 23456 23648 23268 23480 23276 23808 23575 24039 23610 23918 23383 23685 23415 23605 23277 23522 23285 23696 23539 24192 23858 24220 23781 23948 23463 23665 23143 23491 23119 23736 23441 24017 23387 23736 23175 23661 23079 23737 22929 23449 23220 24026 23701 24196 23677 23837 23128 23469 23014 23628 23416 23903 23420 23735 23264 23952 23192 23424 23047 23705 23471 24123 23672 24109 23425 23565 22992 23632 23405 24005 23309 23631 23063 23568 22992 23853 23656 24195 23424 23623 22923 23512 23376 23946 23471 23724 23175 23692 22997 23684 23579 24205 23495 23917 22997 23440 23109 23872 23991 23017 23941 23227 23531 23400 24091 23074 23746 23384 23680 22874 24215 23377 23447 23504 23641 23013 23802 23688 23460 23220 23965 23122 23659 23398 24007 22989 23863 23239 23605 23031 24130 23371 51 10029 12851 13027 14478 14358 14359 14337 15154 14416 33768 28519 27272 25491 25590 24939 24816 24103 25137 24459 23987 24413 24374 23660 24037 24941 24058 23225 24546 23540 23219 24397 24622 22921 24115 23690 23385 24005 24928 23481 23248 24228 24003 22935 24754 23991 22901 23976 23534 22846 23857 24087 23259 23898 23559 23684 23426 24064 23413 23573 23744 23789 23392 24094 23438 23561 23624 23667 23117 23932 23641 23408 23605 23687 23182 23751 23872 23482 23428 23748 23208 23790 23654 23512 23142 23945 23176 23357 23648 23918 22989 23937 23130 23452 23585 23824 23111 24026 23396 23415 23499 24229 23136 23911 23341 23605 23690 24112 23012 24111 23251 23598 23802 24157 23130 23908 23415 23831 23228 24288 23240 23814 23434 24097 23218 24285 23392 23594 23556 23747 23135 24231 23422 23652 23587 24116 23159 24248 23477 23525 23615 24095 23043 24142 23507 23566 23650 23648 22830 24531 23488 23111 23843 23535 22745 24521 23945 22764 24000 23393 22694 24521 23664 22965 23977 23412 22876 24752 23261 23288 23881 23437 22741 24493 23580 22968 24006 23336 23015 23924 23495 23470 23661 23093 23855 23766 23320 23776 23592 23352 23795 23768 11637 15264 16039 16154 17101 17216 17057 17379 17542 17315 28376 26564 25536 24798 25088 24287 24407 24463 24030 23888 24151 23632 24320 23876 23730 23809 23989 23192 24400 23693 23784 23717 23911 23334 24482 23584 23832 23761 23648 23453 24414 23351 23893 23600 24041 23439 24416 23523 23900 23612 24210 23383 24360 23216 24007 23521 23959 23447 24387 23237 23889 23434 23850 23110 24312 23433 23653 23573 23616 23401 24220 23192 23847 23397 23527 23570 24026 23099 23974 23259 23382 23840 23717 23132 23956 22906 23240 24335 23185 23441 23760 23160 23301 24547 22973 23588 23545 22848 24263 23835 22862 23842 23622 23061 24622 23351 23210 23683 23237 23382 24416 22530 24057 23475 23089 23968 23330 23433 23463 23575 23476 23944 23120 23751 23354 23235 23776 23562 23342 23784 23329 23506 23631 23366 23520 23470 23019 23949 23121 23633 23296 23658 23373 24029 22936 23796 23209 23400 23500 23845 23050 23894 23690 23629 23576 23441 23318 23612 23045 23645 23583 23367 23322 23656 22951 23927 23320 23371 23379 23598 23052 24129 23008 23498 23262 23645 23225 24045 22935 23801 23020 23373 23591 24010 22829 23861 23055 23425 23612 23513 23145 5269 16224 17825 18311 18407 18391 19009 18573 19461 19191 29574 26415 25447 24270 25006 24485 23888 23952 24228 23387 23991 24663 23145 23847 23820 23170 23960 24386 22821 23623 23802 23149 23689 24533 23581 22849 24151 23207 22896 24289 23931 22589 24149 23276 22912 23909 23913 23255 23485 23745 23300 23274 23705 23875 23111 23708 23418 23435 23438 23954 23304 23435 23562 23591 23285 23544 23668 23589 23045 23766 23264 23598 23241 24009 23025 23556 23361 23879 23013 23996 23445 23381 23415 23638 23048 23772 23599 23512 23184 23746 23136 23601 23609 23472 23154 23704 23131 23314 23596 23860 22920 23897 23004 23399 23497 23941 22900 23885 23143 23445 23145 24044 22946 23721 23185 23627 23267 24051 22904 23777 23341 22993 22961 23980 23344 23285 23440 23479 22944 23920 23596 23399 23371 23593 23096 23860 23544 23334 23117 23680 23320 23229 23908 23588 22836 24044 23121 22863 24192 23567 22358 24022 23054 22833 23984 23986 22478 24020 23097 22899 23929 24224 22449 23897 23155 22784 23565 24561 23001 23012 23774 23082 22765 23661 23580 22969 23641 23316 23277 23455 23828 23031 23460 23441 23207 23183 23856 23393 23275 23510 23412 22840 18140 19466 19642 20111 20336 19979 20844 20778 20736 34176 26091 24488 24103 24184 24440 23317 24032 23562 23803 23335 24262 23133 23826 23337 23641 22922 24109 23220 23520 23427 23581 22929 24106 23227 23680 23405 23717 22929 23981 23512 23408 23345 23645 23010 23683 23631 23477 23246 23716 22964 23552 23575 23485 22950 23960 23106 23497 23181 24048 23304 23457 23467 23477 23045 23654 23648 23508 23180 23789 23106 23321 23312 24024 23072 23569 23455 23556 22708 23965 24181 22903 23257 24001 23065 22979 23469 24623 22825 23202 23866 23188 22570 23803 24298 23072 22565 24089 23040 22842 23659 24323 22486 23616 23716 23201 22871 24516 23559 23040 23705 23179 23396 23044 23779 23581 23142 23495 23349 23151 23604 23675 23207 23278 23508 23141 23200 23664 23785 22995 23702 23189 23463 23191 23991 22927 23523 23374 23431 22917 23887 23362 23391 23384 23492 22872 24002 23341 23361 23362 23588 22877 23743 23529 23328 23246 23564 22881 23876 23405 23306 23319 23562 22860 23735 23525 23597 22924 23899 23103 23352 23476 23815 22926 23825 23338 23435 23469 23416 23205 23625 22887 23858 23417 23363 23283 23608 22979 23765 23372 23376 23345 17866 20718 22139 21317 22044 21617 21725 21971 22169 21356 25344 23889 23837 24272 23104 23736 23453 22667 24535 23192 22979 23856 23442 22925 24408 22436 23985 23040 22783 24425 23086 23376 23405 22766 24286 23624 22959 23849 23225 22967 24475 22470 23639 23349 23007 23976 23017 23658 23272 23225 23378 23746 23124 23595 23160 23415 23600 23236 23461 23065 23305 23907 22920 23639 23223 23340 23642 23210 23432 23440 23299 23794 23030 23567 22947 23856 23179 23609 23112 23394 23501 23725 23198 23585 22745 24007 22854 23784 22370 23584 23536 23257 23368 23461 23398 23800 22944 23590 22724 24056 22863 23860 23280 23782 23261 23513 23057 23301 23574 23320 23273 23498 23386 23565 23215 23594 22919 23879 23014 23603 22879 24039 22869 23795 23330 23479 23576 23335 23298 23296 23623 23228 23442 23366 23511 23491 23378 23443 22716 24047 22821 23813 22821 24179 22839 24021 22848 24000 23312 23171 23299 22836 24357 22531 23824 23149 24218 22765 23754 23353 23331 23769 22516 23667 22617 24525 22441 24031 22889 24067 23305 23540 23309 23348 23728 23180 23432 23056 23873 23069 23639 23471 23580 23401 23473 23182 23437 23651 23173 23344 23255 23707 23286 23401 23394 23384 23558 23343 23428 23302 23780 23087 23519 22851 23891 22891 23662 22900 23967 22912 23708 22936 24079 22839 23799 22935 23976 22823 23831 22903 23944 22894 23819 23075 23861 22945 23817 22944 23699 23242 23626 22987 23802 23111 23822 22946 23957 22887 23779 22932 24022 22934 23793 22871 24065 22786 23738 22848 24035 22871 23607 22815 23940 22955 23517 22985 23719 23090 23465 23140 23687 23296 23419 23351 23540 23446 23622 23542 23186 23345 23302 23558 23296 23243 23113 23771 23147 23204 23215 23693 23580 23461 24093 22671 24069 22915 24540 22872 24012 22767 24649 22311 23494 22845 23855 23428 23159 24119 22564 23627 22741 24054 23404 22988 23384 23120 23975 22761 24429 22961 23255 23319 23367 23619 23213 23829 22997 23601 23064 23776 23131 23352 23342 23366 23451 23362 23671 23269 23177 23372 23328 23616 23553 23642 23073 23667 22925 23908 23192 23390 23500 23225 23392 23291 23413 23488 23105 23820 22899 23733 22791 23971 23072 23548 23155 23593 23318 23297 23534 23435 23031 23728 22919 23723 22857 24061 22928 23513 23155 23477 23406 23384 23481 23562 23309 23969 22775 23601 23207 23463 23233 23324 23451 23812 23097 24042 23025 23045 23484 23399 22995 23795 22761 23680 22935 23808 23256 23296 23555 23479 23203 23927 22893 23405 23255 23330 23303 23375 23076 23680 17 11271 12490 13193 13793 14290 13913 15078 14377 14561 32465 28460 27162 26816 25289 26017 24674 25016 25352 24101 24968 25063 23861 25526 24039 24038 25158 9941 14448 16743 15470 17085 16811 16613 17439 17265 17223 30426 26782 27392 26222 25095 26068 24385 24529 25409 23928 24424 24693 24006 24464 24156 24193 24262 15473 17702 18559 18355 19217 19173 19098 19575 19544 35309 28160 26202 25760 25380 24933 23976 25113 24193 24450 24412 24136 24064 24299 23905 24485 23672 24279 18893 19709 20000 20800 20120 20917 20678 20748 20917 29067 25579 25824 24448 24762 24608 24385 24023 24663 23694 24452 23751 24300 24077 24048 24114 24296 17771 22064 21491 22060 22233 22112 21838 22500 21640 22464 25473 24851 24281 24040 23947 24294 23366 24411 23703 24008 24022 23748 23478 24381 23254 23988 23543 23888 23653 23636 23720 24182 23275 24369 23300 23831 23732 23636 23495 23924 23375 24151 23177 24045 23608 23733 23892 23756 23447 24230 23204 23862 23433 23754 23625 23653 23737 23996 23387 24274 23431 24093 23912 23585 23407 24012 23111 23927 22967 23980 23883 23128 24332 23317 23183 24115 22904 24274 22789 24413 23840 23360 24668 23235 23321 24667 22628 23679 23554 23271 24128 23013 24564 23648 23207 24787 22589 23466 23965 22790 23760 23253 24172 23784 23095 24789 22764 23422 23832 23124 23788 23335 23606 23704 23315 23824 23698 23319 24048 23176 23616 23440 23508 23728 23181 23828 23769 23319 24025 23180 23652 23268 23760 23687 23463 23798 23389 23304 23613 23417 23879 23229 24130 23090 23828 23009 24064 23042 23648 23148 23980 23488 23696 23338 23853 23438 23625 23157 24128 23217 23762 22965 24182 23022 23821 23015 24279 23096 24036 23323 23787 23420 23599 23412 23860 23317 24119 23010 23950 23272 23592 23706 23496 23361 23634 22973 23778 23607 23465 23344 23722 22944 24088 23616 23546 23467 23636 22920 23798 23603 23449 23333 23792 22806 23527 23753 23752 23193 23892 23659 23540 23672 23833 23021 23983 23218 23480 23529 24041 22868 23884 23125 23633 23243 24114 23083 23694 23366 23640 23178 24075 23286 23468 23465 23583 22984 24046 23260 23512 23368 23496 23130 24035 23163 23564 23377 23505 23224 24077 23386 23476 23452 23515 22969 24140 23285 23509 23468 23514 23172 24290 23005 23648 23467 23176 23416 24237 22610 24084 23072 22906 24231 23881 22587 24199 23026 22843 23872 24438 22423 24052 23189 22856 24080 24026 22468 23996 23087 22817 24287 23873 22393 24131 23144 23127 23520 24264 22480 24049 23171 22793 24155 24052 22524 24080 23108 22845 24021 24189 22473 23760 23458 23075 23360 24372 23114 23490 23428 23126 23703 23459 23183 23552 23433 23003 23884 23415 23290 23623 23404 23097 23905 23300 23440 23433 23461 23405 23857 23149 23519 23368 23357 23462 23798 23197 23425 23489 23675 23161 23937 23163 23470 23379 23524 23317 23860 23110 23492 23386 23313 23252 23966 23033 23651 23296 23512 23404 23945 22969 23808 23201 23269 23678 23951 22936 23845 23194 23506 23324 23968 22986 23831 23223 23371 23446 24001 22987 23688 23225 23497 23377 23993 22889 23849 23091 23338 23574 23815 22957 8499 11607 13215 13645 14056 13800 14616 14181 14933 41400 31168 28935 27784 26268 26722 11473 15158 16225 16935 16609 17857 17306 17571 17598 17856 30381 29172 26936 26665 25798 10479 17056 18958 18192 19456 18781 19242 19436 19592 19160 30544 27136 26411 26061 25626 24997 19623 19882 21059 20889 20840 20933 21089 20676 21392 29895 26423 25405 25469 24624 25174 21345 22129 22144 22536 21958 22621 22454 22344 22103 22668 25010 24927 24673 24663 23995 24687 23847 24043 24304 24512 23666 24551 23795 23989 24264 24381 23622 24423 23751 23959 24199 24212 23538 24342 23788 23899 23979 24470 23467 24301 23706 23900 23845 24391 23424 24312 23810 24179 23554 24477 23559 23920 23754 24124 23539 24402 23353 24136 23611 23792 23643 24533 23309 24064 23763 23543 23644 24789 23031 24212 23725 23577 23618 24982 23131 23716 23915 23687 23286 24983 23576 23222 24209 23838 23075 24162 24360 22952 23990 23795 22988 24461 24150 22945 24098 23644 23061 24520 24119 22887 23862 23758 23189 24040 24545 23133 23477 24054 23457 23617 24726 23123 23424 24044 23473 23379 24593 23981 22867 24369 23309 23064 24375 24262 
22679 21779 22542 22025 22436 21691 22287 21840 22823 22320 23245 22528 23324 22496 23142 22096 22744 21689 22400 21649 22360 21760 22944 22179 23013 22225 22803 22096 22759 21971 22608 22411 22604 21726 22257 21674 22617 22245 22992 22525 23121 22442 22811 21777 22215 21737 22386 22106 22827 22447 22932 22216 22613 21913 22498 21902 22481 21733 22179 21885 22745 22409 23101 22575 23000 22561 22736 22172 22487 21814 22186 22027 22727 22549 23075 22576 22901 22168 22337 21722 21863 20973 21648 21698 22799 23026 23821 23493 23659 22905 22283 21520 21335 21201 22481 22752 23056 22341 22263 21767 22040 21211 21547 21708 22596 23030 23921 23379 22969 21581 21491 20995 21593 22113 22914 22758 22513 21830 21874 20968 21486 22189 23589 23597 23356 21994 21217 21283 22627 22867 22411 22248 22301 21957 21953 22619 22594 23142 22503 22573 21844 22048 22231 22556 22412 22409 22624 22191 21763 22176 22378 22822 22641 22261 21810 22069 22473 22529 22056 22195 21815 22390 22515 22823 22459 22321 21737 22352 22285 22541 22043 22609 21650 22359 22701 22999 22545 22489 21736 22373 22367 22632 22026 22392 21700 22237 3673 5411 8129 8823 10119 10802 12424 43624 38231 34007 31522 28758 28375 27172 26160 25218 25492 24503 24200 24154 24607 23031 24153 23186 23639 22899 24154 22695 23149 23028 23321 22304 23613 22813 22914 22651 23171 22342 23223 22733 22805 22331 23240 22233 22605 22941 22979 21956 23181 22228 22539 22450 23460 21903 23013 22135 22727 22218 23328 21785 22980 22278 22557 22290 23279 22256 22508 22475 22710 21741 23015 22408 22344 22408 22600 21761 22947 22697 22266 22309 22755 21895 21770 23532 22272 21519 23195 22082 21728 23649 22400 21500 23051 21834 22043 23856 22437 21207 23276 22180 21686 23250 23068 21228 23272 22189 21680 23699 22328 21395 23099 22384 21995 23026 22657 22231 22487 22481 22185 22612 22733 22048 22299 22828 22186 22528 22796 22293 22214 22704 22161 22585 22821 22291 22425 22807 21991 22588 22692 22583 21962 22829 21928 22415 22667 22407 22142 22740 22016 22628 22529 22700 21888 22924 21979 22535 22439 22592 22005 22813 21963 22730 22652 22395 22119 22669 21798 22928 22476 22651 21899 22821 21928 22670 22541 22396 22251 22734 21754 23175 22244 22553 22187 22530 21525 22962 22135 22464 22167 123 3890 9088 10603 12183 13443 14349 14288 16071 43008 36760 32679 30135 27573 27304 26066 25243 24592 24605 23201 24386 24094 22901 23680 23150 22049 24468 22489 22652 23452 22993 22169 24609 22485 22970 23097 22608 22219 24277 21760 23059 22721 22158 22525 24027 21763 22444 22872 22375 22384 23778 22240 22837 22602 22068 22857 22797 22229 22685 22465 22183 22766 22851 22348 22406 22572 22144 22572 22667 22155 22307 22503 22027 23090 22348 22166 22372 22621 21895 23077 21968 22771 22154 22503 22106 23184 21697 22800 21856 22168 22503 23100 21639 22983 21753 22296 22379 22796 21859 22887 21769 22769 22562 22422 22008 22665 21619 23067 22439 22368 22341 22926 21866 23184 21666 22762 21904 22413 22080 23103 21560 22969 21863 22410 22503 22684 21889 22702 21942 22477 22528 22166 22293 22481 21726 23067 21890 22498 22001 22231 22307 22998 21640 22813 21549 22047 22614 22979 21463 22871 21785 22033 23415 21370 22505 22180 21043 23617 23124 21284 22535 22251 21192 23312 22519 21489 22693 22603 21515 23743 21347 22265 22269 21764 22255 22698 22007 22378 22340 21788 22895 22283 22202 22384 22323 21991 22929 21842 22625 22256 22209 258 8003 10398 13889 14659 15824 16717 17595 17025 18516 36985 32143 29293 27497 25399 25722 24347 23980 23856 24192 22819 23729 22597 22969 23047 23485 22080 23376 22262 22576 22674 23318 21827 23074 22281 22841 22109 23431 22117 22693 22226 22745 21911 23312 22167 22423 22368 22624 21737 23177 22563 22817 21794 23096 21836 22409 22441 23067 21632 22896 22224 22629 21705 23035 22545 22296 22194 22617 22154 22157 22532 23030 21686 22849 22102 22324 22048 23256 21832 22241 22407 22297 21136 23178 22995 21213 22519 22418 21447 22773 23497 21462 22211 22518 21559 22521 23564 22117 21355 23072 22006 21701 23411 22490 21115 23123 21744 21339 22349 22574 22080 22347 22452 21858 22749 22516 22083 22480 22240 21921 22558 22661 22296 22087 22631 22437 22146 22595 22528 21773 22772 22063 22180 22563 22841 21685 22869 22009 22355 22109 23034 21768 22432 22167 22482 21817 23092 21761 22645 22126 22549 21537 23266 22029 22343 22165 22615 21802 23071 21953 22228 22168 22519 21444 23200 21940 22353 22120 22680 21754 22493 22512 22484 21865 22672 22233 22413 22261 22888 21461 22966 21800 22197 21963 23091 21777 22640 21995 22336 21904 23121 21992 10607 13879 16732 16523 18838 18400 18891 19213 19948 34189 30363 27680 26093 24256 24776 23539 22833 23367 24284 21688 23168 22503 22102 22704 24084 22061 22089 22708 22391 21790 24037 21929 22132 22669 22128 21997 24097 22539 21611 22839 22198 21241 23257 23169 21829 22781 22066 22231 22414 22965 21949 22598 22352 22742 21873 22830 22625 21988 22309 22617 21958 22426 22647 22785 21751 22632 22297 22138 22279 23081 22342 22227 22309 22485 21931 22491 22696 22495 21799 22733 21888 22334 22023 23216 22119 22300 22112 22599 21795 22637 22553 22699 21667 22732 21951 22497 21920 23159 21808 22408 22064 22580 21571 22899 22353 22278 21999 22720 21761 22318 22322 23053 21581 22394 22103 22553 21491 23126 22135 22272 22179 22493 21721 23010 22445 22509 21796 22694 21865 22103 22387 22764 21506 22711 21925 22331 21998 23185 21861 22513 22321 22332 21386 23755 21865 21913 22669 21731 21481 23420 22605 21255 22624 22034 21164 23228 22647 21389 22715 22048 21161 23363 22934 21175 22400 22599 22032 21537 23331 22201 21991 22336 22437 22021 22844 21807 22457 22150 22055 22542 22552 21868 22544 22080 21963 22573 22603 21816 22717 21804 22307 15588 17505 18878 19840 19496 21103 20457 20981 20812 21094 26968 25802 23441 24038 22810 22971 22983 22981 22348 22992 22140 22811 22639 22464 22357 22573 21809 23217 21785 22799 22061 22334 22528 22873 21809 22813 21670 22656 22445 22327 22218 22583 21664 23099 21703 22884 21969 22359 22360 22880 21403 22912 22001 22637 22355 22272 22344 22781 21856 23087 21656 22899 21913 22333 22604 22294 22272 22747 22016 22912 21661 22720 21944 23034 22386 22188 22096 21632 22839 23248 21229 22711 21267 23663 21591 22672 21611 21418 23542 21337 22753 21802 21936 23458 21175 22943 21383 23184 22064 22301 21774 21661 23262 21234 22574 21696 22785 22055 22711 22409 22518 22523 22162 22224 21944 22838 21964 22471 22203 22615 22240 22321 22315 21919 23077 21613 22744 21853 22679 22120 22555 22037 22344 22486 22359 22127 22135 22488 22232 22295 22183 22109 22765 21913 22564 21712 23062 21658 22693 21691 23048 21672 22758 21968 22722 22087 22599 21872 22355 22368 22184 22187 22481 22208 22624 22050 22620 21905 22986 21761 22658 21530 22992 21658 22774 21628 23143 21517 22752 21632 22385 22360 22424 21937 22153 22439 22165 22089 22453 22254 22628 21972 22379 21914 22775 21783 22501 21504 23040 21584 22747 21714 23065 21837 22814 21960 22728 22005 22679 21621 22473 22371 22424 21792 22305 22628 22195 21655 22205 22445 22162 21861 22159 22810 21920 21720 21767 23214 21270 22566 21495 23419 21263 22348 21443 23278 21696 21965 21810 22657 22464 22327 21933 22725 22170 22229 22387 22248 22369 22258 22696 21997 22448 22091 22669 21984 22199 22178 22478 22016 22165 22079 22796 22057 22025 21970 22389 22341 21985 22748 21895 22722 21764 22839 21957 22816 21943 23080 21564 22667 21526 22980 21729 22439 21838 22850 21803 22551 21859 22600 22097 22400 22313 22093 22111 22165 22329 22534 22024 23024 21589 22865 21505 23159 21497 22635 21934 22768 22147 22359 22497 22154 21914 22110 22130 22517 21692 22846 21690 22874 21591 23154 21551 22464 21785 22657 22061 22260 22391 22084 21991 22094 22490 22192 21928 22728 21884 22727 21569 22931 21861 22374 22102 22352 22248 22072 22839 22077 21884 21920 22039 22860 21143 23640 20824 22458 21350 22552 22521 21576 23413 21367 21834 22101 22074 22949 21649 23563 21052 22284 21638 22101 22722 21543 23370 21888 22274 23463 20933 22135 22497 21573 22574 21675 22617 22338 22053 22549 22452 22051 22736 22015 22233 22587 21922 22341 22071 22283 22609 21796 22860 22137 22361 22569 22037 22083 22683 21801 22392 22195 129 102 4272 6975 9728 9943 12334 12446 13064 13967 43649 37047 34002 29952 28808 27330 26277 25318 25570 24078 24893 23476 24404 23643 23448 23341 23789 124 6891 9747 12856 14231 15200 15454 17505 16482 43572 38501 33904 30377 28495 26694 26881 24848 25849 24225 24402 24236 23776 23232 24195 22732 23629 23147 6770 11080 14276 15255 17392 17319 18669 18670 18972 39709 34424 29431 28503 26491 25692 25191 24905 23575 24790 23272 23731 23764 23250 22955 23704 22453 8763 12142 15320 17038 18791 18556 19989 19479 20252 20499 32970 30023 27856 25212 26588 24279 24170 25085 22850 23019 24394 21983 23365 23069 22297 23425 22242 16421 18224 18461 21495 20052 20455 22272 20246 20829 22489 26440 25770 24533 23552 23827 22595 23214 23645 21769 24089 22856 22395 23455 22494 23239 22915 22489 22593 22625 22405 22939 22124 22988 22571 22402 22961 22405 22267 22998 22163 22592 22551 22430 22551 22375 22653 22839 22114 23305 22211 22987 22899 22304 22158 22924 22103 22962 21752 22964 22508 22405 22696 22737 22087 23248 21965 22575 22594 22403 22147 22579 22029 23017 21728 23207 21709 22699 22203 22576 22100 22480 22290 22984 21840 23097 22168 22789 22625 22355 22114 22533 22023 22968 21761 23117 22092 22619 22631 22674 21957 23049 21520 22744 21547 22983 22251 22615 22493 22242 21929 23210 21687 22724 21847 22650 22177 22464 22512 22645 21566 23282 21664 22605 21956 22642 22183 22176 22473 22704 21965 23150 21760 22570 22083 22548 22233 22528 22519 22237 22151 22307 22246 22761 22199 22713 21936 22796 22016 22986 21719 22806 21684 23233 21509 22752 21386 23284 21527 22927 21807 23249 21844 22795 21877 23069 22051 22305 21916 21804 23364 21281 22843 21824 21619 23816 20981 22944 22208 21684 23510 21343 22375 22300 21157 23314 22914 21296 22555 22340 21194 23287 22629 21285 22747 22192 21096 23594 22394 21320 22442 22189 21314 22464 23255 22039 22425 22163 22312 22173 23048 21845 22373 22182 22368 22143 22896 22121 22208 22535 22262 21781 22697 22529 22036 22411 22371 21725 22556 22582 22105 22271 22660 22035 22368 22647 22240 22086 22544 22096 22550 22648 22145 22175 22571 21773 22693 22453 22274 21941 22720 21975 22437 22531 22329 22098 22601 21914 22731 22453 22145 22335 22485 21745 23014 22200 22208 22203 22810 21656 23044 21883 22540 22139 22586 21722 23251 21657 22310 22080 22562 21684 23109 21974 22261 22151 22759 21568 23101 21796 22369 22016 22167 21811 23120 22217 22313 22104 22496 21434 23045 21876 22543 22095 22163 21618 23054 21820 22338 22007 22295 21511 22983 22253 22117 22240 22441 21624 22915 22217 22347 22205 22427 21671 23219 21696 22644 21991 22467 21792 23148 21627 22745 21896 22385 22097 23078 21554 22801 21812 22262 22217 22704 21635 22791 21987 22435 22067 23082 21654 22595 21934 22251 22167 22889 21634 22926 22062 22284 22262 22936 21657 22592 21963 22262 22328 22785 21598 22830 21944 22007 22422 22536 21777 22792 21854 22167 22521 22800 21600 22752 21934 22048 22390 22797 21601 22744 21939 21760 22486 23115 21264 22999 21787 21404 23228 22279 21396 22867 21776 135 2922 5234 8067 10838 10746 13352 14163 12807 43607 41859 35171 33816 29947 27339 2245 8215 10913 15410 15784 15928 17578 17454 17306 43508 40227 34730 31265 28717 27591 6644 9505 15081 15952 16898 19769 18780 18989 20083 19136 37824 33970 29144 27621 26793 10888 15178 17495 17369 19875 19721 20186 21112 21278 20404 34892 29865 27472 26544 26057 24521 18827 19735 20405 21644 22023 21230 22061 21666 21572 29328 27532 25174 24955 24452 23959 23760 24308 23465 23313 23524 22726 22766 23863 22912 23104 22936 23256 22522 23578 22466 22872 22704 22726 22155 23389 22907 22567 22811 22715 22035 23372 22781 22572 22808 22823 22121 23045 22867 22556 22519 22865 22099 23117 22753 22536 22601 22771 21772 23172 22579 22456 22528 22762 21955 23148 22457 22532 22384 22727 21811 23184 22520 22416 22389 22808 21901 23021 22594 22540 22252 22916 21912 22791 22513 23037 21643 22932 21988 22359 22645 22745 21912 23028 21745 22444 22597 22755 21920 22854 21729 22255 22397 22919 21703 22962 21956 22348 22364 23209 21696 23008 21888 22445 22200 23200 21671 22714 22176 22808 21906 23321 21841 22497 22087 
