# Supplementary material for: An Active Feature Selection Strategy for DWT in Artificial Taste
Source: Hindawi journal article supplement (doi:10.1155/2018/9709505), 2018-01-01
Supplement: f1 [file 9709505.f1.zip › puerTea-med-3.txt]

43475 43476 43472 43456 52 5038 16272 19776 20623 22337 22072 22490 21671 22128 21952 22947 22200 22634 21944 22469 22490 23304 22600 22742 22021 23079 22570 22929 22474 22858 21602 23017 23098 23612 22393 22144 22272 23244 22685 22498 21824 21934 22393 23898 23337 22906 21760 21952 22804 23137 22288 22248 21746 23488 23767 23228 21648 22490 22807 23214 22167 22309 21588 23045 23832 23552 21958 21847 23041 22733 22936 22171 23040 23064 23176 22039 22960 22709 22900 22500 22515 22644 23533 22976 22635 22375 23125 22702 22902 22528 22652 22608 23488 22682 22766 22364 23323 22571 22917 22246 22941 22800 23565 22610 22876 22328 23323 22578 23108 22166 22873 22796 23608 22247 22907 22616 23241 22236 22810 22472 23653 22722 23080 22080 23360 22469 23158 22134 23000 22731 23532 22085 22807 22209 23299 22184 23116 21913 23283 22790 23329 22035 23020 22470 23164 22226 23236 22010 23433 22929 23493 22158 22967 22286 23472 22237 22957 21939 23055 22685 23618 22313 22857 22180 23303 22480 22968 22080 22848 22797 23608 22634 22816 22144 23083 22656 22984 22219 22727 22638 23564 22631 22788 22250 5227 15349 18486 18056 19200 20215 20545 20023 19430 19719 31992 25700 24308 22835 22989 23813 24588 23512 22362 22049 23163 23252 22748 22233 22114 22425 23973 23783 22737 21690 22391 23207 23242 22520 22387 21895 23194 23653 22840 22663 22252 22998 22805 23049 22204 22788 22530 23239 23167 23211 22552 22609 22707 23226 22713 22958 22418 22631 22452 23581 22968 22956 22301 23086 22560 23223 22277 22972 21978 23122 22874 23386 22213 22826 22438 23366 22409 23564 22084 22956 22649 23642 22656 23210 22008 23255 22396 23216 22052 22765 22372 23571 22583 23073 22071 23244 22508 23149 22130 22989 22492 23674 22486 23046 22200 23383 22395 23052 22019 23061 22888 23563 22515 22849 21996 23333 22360 23090 21973 22921 22722 23523 22225 22686 22247 23299 22391 23384 22151 22982 22952 23341 22393 22845 22649 23249 22359 22352 22043 23002 22893 23401 22326 22740 22564 23352 22429 22571 21547 23008 23691 23258 21760 21959 22874 23174 22265 22328 21844 23649 23652 22829 21760 23137 22952 22688 22112 21850 22728 24021 23203 21896 22122 23360 22600 22439 22240 22518 23410 22823 22752 22424 23124 22652 22766 22162 22808 22984 23192 22297 22688 22710 17000 19221 20295 20752 21699 20818 21260 21191 21650 36425 25233 23516 24331 23318 23452 22453 23143 22780 23314 22355 23004 22261 23656 22840 23168 22121 23328 22560 23380 22423 22913 22147 23475 22848 23240 22113 23041 22570 23136 22625 22880 22272 23561 22729 23324 21930 23136 22672 23191 22129 22698 22589 23675 22555 22919 21992 23286 22464 23096 22259 22850 22464 23572 22621 22807 22216 23339 22344 23133 22094 23253 22915 22953 22155 22948 22708 23000 22533 22596 22547 23511 22730 22768 22211 23240 22768 22780 21956 22425 23326 23704 21810 22283 23068 22712 22050 21950 23002 23979 22749 21813 22360 23256 22321 22257 21757 22799 23804 23547 21814 22215 23055 22717 22687 22232 22656 22760 23586 22769 22693 22502 23044 22617 22837 22194 22770 22995 23381 22675 22713 22421 23175 22488 22908 22094 22960 22912 23480 22252 22761 22373 23206 22225 23044 22024 22996 22808 23518 22430 22865 22057 23365 22379 23105 22049 22818 22193 23301 22784 23243 22016 22864 22404 23111 22144 22921 21795 23360 22650 23432 21993 22840 22304 23193 22272 22417 21836 23015 22616 23485 22210 22880 22268 23230 22336 23012 22144 22927 22770 23461 22390 14566 20511 21589 21158 21568 21285 22601 21909 21961 21335 26923 23765 23424 22780 22626 23105 24244 22909 22073 22144 23531 22532 22540 21846 22240 23398 24021 22507 21850 22336 23404 22487 22602 21683 23195 23876 23190 21703 22515 23249 23239 22498 22213 22608 22909 23490 22598 22624 22640 23111 22574 22624 22292 22566 22823 23389 22825 22885 22228 23149 22498 23043 22311 22646 22855 23424 22816 23065 21934 23045 22499 23040 22027 22694 22340 23566 22803 23325 21964 23022 22537 23215 22146 22774 22120 23510 22712 23008 21965 23127 22353 23192 22119 23040 21844 23421 22598 23229 21838 23110 22431 23034 22080 22752 22549 23490 22474 22963 22177 23313 22287 23142 22297 22821 22245 23518 22667 23039 22038 22711 22624 23169 22343 22839 22023 23052 22787 23436 22333 22696 22560 23175 22453 22851 21884 22814 22666 23859 22950 22363 21760 23168 22806 22651 22064 21812 21799 22871 23097 23927 23158 22203 21547 22616 23116 22865 22238 22245 21634 22856 23660 23841 22394 21796 22149 23059 23101 22598 22695 22144 23063 23053 23286 22470 22592 22588 22916 22486 22934 22160 22759 22663 23384 22942 23272 22265 22685 22466 23179 22609 22980 22009 20474 21104 22117 21939 22810 22137 22289 21509 22636 27798 24129 22572 23277 22163 23072 22672 23812 22631 23120 22032 23164 22553 23155 22294 23003 21980 23002 22639 23540 22250 22871 21920 22903 22381 23244 22201 22866 21941 22792 22296 23469 22616 23185 21892 22861 22363 23253 22176 23168 22231 22658 22240 23400 22842 23211 22213 22772 22384 23244 22400 22852 22224 22644 22192 23132 22912 23429 22428 22648 22130 23105 22758 22916 22485 22461 21496 22120 22241 23617 23645 23559 22074 21836 21882 23159 22948 22662 22648 22192 21698 21974 22360 23797 23786 23332 21895 21800 22025 23121 22873 22473 22335 21952 22156 23040 23421 22839 22860 22087 22801 22684 23040 22615 22795 22427 22426 22627 23279 23032 23084 22183 22629 22555 23173 22343 22945 22440 22560 22429 23392 22770 22992 22018 22969 22545 23287 22363 22948 22119 22594 22418 23412 22680 23296 21991 22900 22347 23384 22272 22980 22068 22789 22103 23481 22754 23365 22068 22756 22211 23237 22331 23078 22013 22891 22032 23177 22603 23701 22561 22914 22097 23241 22451 22976 22552 22759 21922 23090 22490 23556 22233 22769 22252 23324 22389 22956 22236 22824 22120 23046 22810 21367 22134 22528 21753 22564 22336 22791 21997 22438 21804 23566 22935 23511 22676 22772 22127 23051 22631 22980 22207 22146 21975 23669 23596 23044 21589 22554 23001 22924 22283 21867 21936 23708 23636 22800 21639 22192 23040 22840 22144 22224 21655 22965 23693 23872 22547 21786 22252 23283 22813 22784 22479 22472 23268 22872 22728 22198 22786 22766 22741 22635 22609 22541 23392 22938 22800 22277 22929 22576 22930 22441 22575 22475 23296 22771 22729 22133 22903 22583 23208 22235 22738 22128 23410 22784 23247 22128 23036 22524 23082 22347 22685 22199 23477 22760 23452 21981 22832 22181 23299 22284 22748 21816 22935 22813 23448 22163 22725 22152 23464 22359 23144 22095 22799 22455 23497 22540 22868 21882 23151 22656 23057 22319 22897 21786 23362 22641 23415 21949 22743 22280 23256 22124 22884 21972 23068 22773 23384 22118 22723 22639 23082 22257 22711 22248 23328 22812 22940 22038 22912 22539 22969 21723 22682 22049 23650 23165 23703 22144 22199 22669 23120 22237 22309 21595 23195 23605 23184 22153 21744 22576 23155 22272 22209 21592 23363 23792 22982 21621 22617 23065 22708 22212 21737 22833 23948 22903 22245 22978 22640 22816 22168 22824 22964 23308 22423 22567 22661 22968 22475 22880 22203 23211 22991 23040 22172 22965 22552 23020 22500 22438 22401 23457 22521 22826 21975 23131 22456 22984 22057 22921 22696 23621 22321 22616 22341 23296 22343 22993 21881 22837 22554 23612 22288 22839 21956 23203 22357 23068 22218 22800 22570 23638 22486 22887 22009 23169 22391 23025 22400 22763 22153 23463 22695 22976 21948 22932 22507 23089 22119 23095 21764 23205 22549 23511 22099 22795 22322 23260 22136 23040 21943 22898 22818 23424 22329 22610 22080 23032 22475 22843 22258 22513 22498 23344 22636 22680 22208 23125 22567 22855 22103 22229 22536 23937 23040 22331 21519 22154 22907 23081 22179 22279 21424 22991 23720 23516 21960 21798 22544 23278 22775 22455 21875 21952 22920 23976 22930 21824 21985 23184 22620 22416 21798 22232 23064 23095 23343 22240 22673 22509 23082 22541 22844 22138 22841 23031 23110 22353 22427 22358 23095 22355 22936 22131 23016 22743 23150 22195 22839 22528 23085 22309 22887 22063 23341 22731 23008 22034 23065 22423 22955 22203 22681 22191 23385 22661 22950 21890 22976 22481 23169 21430 22802 22224 23535 22657 22969 21896 23095 22432 23027 22096 22781 22007 23220 22700 23548 22186 22793 22072 23290 22318 22922 21842 22727 22629 23657 22504 22917 21931 23156 22404 23159 22085 22715 22144 23552 22788 22936 11651 18375 18862 19826 19409 20137 20153 21068 20409 43452 27240 25193 23980 23848 22828 23120 22744 23786 23122 22913 22265 23065 23127 23059 22285 22115 22481 18332 20560 20265 20009 21641 21636 21262 20640 21184 36816 25826 24668 23398 22097 22917 23460 23104 22536 22116 22204 23508 24012 23272 21792 22138 23201 4802 19863 20572 21689 21863 22441 21700 21832 22024 22353 27977 24211 22905 23523 23351 23488 22423 22883 22690 23287 22512 22869 22211 23452 23000 23287 22228 16664 21088 22226 21524 22144 21856 23136 22115 22325 21818 25699 23028 23396 22273 23244 22807 23813 22237 23111 22603 23267 22756 22788 22680 23635 22349 22796 20352 22743 21747 22730 21740 23188 22415 22823 21731 22989 23404 23304 22248 23048 22756 23819 22536 22988 21959 23197 22385 23156 22278 22681 22323 23531 22699 22976 22128 22926 22573 23096 22388 22743 22216 23409 22753 22862 22135 23173 22554 22860 22247 22346 22749 24031 23096 22212 21780 23151 22671 22456 21729 22195 23410 24032 22742 21774 22323 23316 22373 22359 21607 23121 23861 23285 21581 22185 23147 22705 21899 22036 22949 22908 23357 22323 22646 22720 23015 22496 22935 22120 22674 22920 23284 22410 22509 22498 23149 22490 23085 21976 22788 22872 23287 22225 22664 22155 23204 22324 22955 22168 22826 22605 23601 22333 22741 22268 23441 22418 23024 21975 22835 22373 23649 22507 22757 22029 23346 22394 22868 22103 22672 22465 23517 22168 22828 22400 23114 22147 22849 22193 23396 22685 23187 21850 23244 22498 23042 22161 22786 22609 23511 22348 22690 22436 23093 22293 22714 22132 23111 22902 23260 22225 22663 22561 22964 22439 22474 22545 23477 22458 22699 22434 23195 22759 21873 22320 23919 22937 21979 22125 23298 22204 21829 22137 23872 22761 21810 22077 23279 22344 21963 22272 23907 22633 21765 22823 22971 22290 21944 23660 23127 22548 22692 22944 22329 22570 22915 23223 22230 23056 22607 22644 22240 23303 22664 22507 22386 23221 22167 22625 22748 23424 22073 23000 22471 23186 21971 23432 22668 22840 22084 23254 22177 22714 22292 23463 22310 22826 22544 23014 21948 23112 22660 23372 21815 23205 22156 22997 22365 23542 22208 22853 22529 23121 22215 22888 22672 23337 22002 22934 22433 23027 21972 22903 22818 23077 21894 23090 22080 22998 22194 23654 22257 22696 22459 23076 22188 22977 22855 23092 22143 23157 22289 22546 22548 23288 22164 22693 22552 22809 22042 23263 22874 22695 22365 22885 22162 22646 23468 22670 21799 23361 22204 21959 21918 23976 22237 21994 22968 22295 21620 23869 22917 21799 23034 22517 21985 22162 23649 22919 21560 23197 22365 21872 22602 23993 22617 22411 22984 22325 22488 22648 23214 22576 22528 22762 22808 22254 22800 22830 22991 22096 23040 22442 22715 22120 23296 22668 22578 22542 23108 22468 22622 22780 23369 21921 23119 22393 22950 21985 23124 22752 22897 21981 23239 22142 22765 22198 23564 22183 22775 22396 23037 22171 22769 22762 23297 21944 23033 22490 23069 21813 23180 22574 23077 21920 23337 22243 22872 21941 23130 22745 22932 21834 23239 22306 23400 21824 23409 22531 23260 21754 23182 22225 22618 21929 46 17188 19073 19242 20511 19861 20599 19893 21173 20777 32352 25072 24616 23319 23488 22240 18391 20669 20855 20847 22024 21191 21336 20668 21605 37113 26130 23138 23110 23619 23112 16497 20285 22553 22559 21489 21060 22163 22228 21784 21192 25492 25030 23320 22223 23248 15753 21282 21508 22343 22445 22508 21801 22586 22120 22931 24748 23880 23562 23169 22592 23412 21400 22449 22046 23200 22608 22563 22110 22776 22159 25418 22859 23666 22746 23030 22641 23424 22423 22838 22462 23502 22887 23107 21984 23334 22298 23361 22012 23559 22830 23053 22019 23277 22294 23152 22160 23429 22718 23048 22109 23322 22192 23059 22192 23648 22639 22946 22274 23169 22147 22992 22292 23588 22537 22759 22264 23298 22122 22746 22262 23497 22600 22621 22506 23067 22308 22540 22544 23463 22343 22577 22496 23077 22311 22611 22528 23427 22272 22600 22544 23048 22375 22285 22500 23966 22544 22007 21851 23319 22288 22233 21697 23800 23431 21956 21676 23249 22477 22361 21585 22967 23801 22632 21592 23008 22759 22380 21713 23439 23784 22194 22372 22604 22937 22440 22494 22848 23344 22257 22709 22724 22698 22213 22878 
21654 22543 21744 22211 21601 22137 21568 22096 21444 22156 21080 22404 21544 22160 21565 22272 21555 22310 21638 22280 21781 21610 21116 21274 20967 21344 21004 21196 21044 21248 20947 21085 21017 21367 21089 21469 21094 21420 22278 22148 22768 21737 22080 21563 22599 21927 22231 21872 21932 21747 22756 22096 22138 21480 22506 21894 22379 21543 22055 21625 22798 22123 22391 21530 22406 22029 22374 21930 21997 21928 22784 21863 21997 21763 22608 21667 22355 21534 22659 22241 22493 21351 22136 21948 22401 21669 21952 21657 22439 22272 22378 21447 22267 22006 22245 21598 21911 21997 22796 22199 22190 21520 22382 22021 22272 20954 21187 21349 22179 21901 21575 21158 22034 21664 21669 20655 21697 22577 22310 20676 21028 21909 21820 21029 20920 21256 22752 22613 21226 20869 22167 21849 21587 21057 21128 22340 22976 21683 20915 21373 22272 21559 21428 20736 21861 22378 22924 21980 21236 21945 21824 21968 21365 21747 21255 22059 22171 22113 21472 21568 21801 22055 21545 21788 21095 21991 22134 22335 21481 21721 21515 22140 21575 21167 21269 21748 21810 22391 21432 21675 21588 22105 21468 21801 71 7624 10093 11607 11429 12832 13099 14059 13409 14238 32405 27977 24055 23067 21727 22220 21875 22417 21693 22523 21292 22019 22068 22579 21748 21769 21389 22284 21616 22089 21478 21687 21493 22465 22069 22082 21402 22052 21805 21913 21497 21767 21223 22339 21960 22443 21287 21778 21445 22306 21594 22102 21448 21841 21667 22503 22083 22220 21435 21868 21872 22233 21621 22694 22135 21888 21985 22330 21609 21733 21559 22279 21820 21895 21408 21508 21945 22912 22514 21631 21112 21923 22248 22290 21530 21419 20987 22406 22994 22445 20994 21248 22128 22097 21509 21105 21371 23024 22759 21768 20827 21648 22341 21977 21704 20918 21865 23082 22542 21383 21898 21585 22310 21613 22112 21423 22000 22242 22418 21614 21709 21860 21949 21600 22114 21348 22277 22067 22320 21441 21948 21858 22111 21755 21728 21555 22426 22060 22390 21425 21954 21802 22163 21107 21889 21340 22464 21954 22248 21157 22272 21680 22176 21664 21820 21605 22608 21932 22048 21308 22294 21711 21971 21288 22252 21935 22685 21621 21904 21491 22246 21478 21911 21238 22357 22000 22137 21556 22071 21873 22229 21441 21857 21704 22664 21840 21911 21385 22500 21706 21885 388 11675 14136 15408 15604 16934 16688 17424 16657 17830 26647 28872 25053 24400 23683 23572 22679 22988 21910 22500 22827 23414 21893 21870 22422 22626 21917 21532 20971 22104 23174 23076 21665 21337 22146 22630 21817 21744 21056 22373 23138 22901 21424 21248 22184 22542 21878 21469 21140 22238 22849 22039 21936 21739 22471 21837 22000 21552 21907 22249 22560 21943 21766 21832 22396 21863 21919 21505 22483 22306 22285 21461 22291 21979 22086 21714 21890 22032 22707 21904 21991 21818 22432 21687 22259 21365 22423 22173 22698 21431 22103 21818 22232 21568 21959 21948 22649 21720 21873 21760 22362 21606 21928 21573 22663 22043 22333 21329 22242 22071 22277 21638 21808 21871 22519 22049 22209 21294 22397 21938 22288 21744 21959 21794 22711 21943 21894 21751 22248 21853 22091 21605 21831 22058 22644 21869 21993 21470 22324 21800 22019 21561 21865 22071 22600 22235 21584 21324 22102 22215 22049 21401 21099 21311 23053 23022 22007 21520 21083 21491 22475 21790 21879 21043 21927 22875 23184 21792 21075 21379 22343 22036 21388 21417 21524 22228 22095 22429 21556 21938 22042 22164 21718 21863 21576 22395 22212 22368 21632 21816 21824 22232 15801 13329 16276 18290 18218 18560 18440 19473 18929 19088 22944 22737 22381 22829 21677 21885 21676 22208 21465 21883 21175 22368 21879 22297 21294 21846 21607 22002 21459 21923 21297 22420 21969 22121 21063 22046 21689 21897 21318 21664 21398 22408 21836 21825 21269 22183 21536 22144 21265 21793 21866 22664 21871 22091 21354 22209 21809 22002 21696 21695 21668 22445 22026 22106 21326 21888 21856 22120 21536 21924 21421 22288 22276 22379 21464 21553 22094 22274 21760 21763 20818 21870 23002 22775 21462 21074 21987 22144 21545 21486 20864 21603 22679 22997 21781 20992 21600 22325 21547 21327 21040 22672 23237 21843 21781 22035 22279 21607 22038 21757 22098 22252 22549 22149 21894 21879 22352 21892 22272 21697 21802 21539 22691 22238 22313 21527 21885 21852 22254 21878 21827 21522 22397 22087 22320 21323 21984 21664 22373 21549 22351 21286 22055 21992 22752 21966 22248 21271 21948 21621 22427 21767 22139 21376 21896 21829 22626 21942 22144 21244 22026 21834 22325 21436 22308 21301 22178 22078 22555 21496 21821 21488 22449 21559 22166 21275 21989 21906 22502 21872 21911 21252 21815 21895 22427 21709 21936 21531 21792 21666 22311 16717 19275 19520 20207 19759 20783 20548 20858 20445 20506 22779 22785 23009 23367 22611 21655 20999 21763 22306 22194 21431 21371 20967 21977 22757 23120 22306 21384 20964 22123 22237 22136 21579 21675 21139 21315 22326 23111 22868 21585 21749 21520 22211 21853 21943 22153 21573 21571 22040 22203 22466 21872 21686 21585 22213 21895 21975 21163 22117 21557 22497 22176 22662 22076 22060 21440 22061 21801 22504 21701 22567 21425 21897 21897 22725 22033 22419 21617 22039 21500 22283 21849 22320 21562 22096 21205 21959 21915 22690 22098 22377 21489 21910 21497 22407 21884 22276 21560 22128 21253 22391 21992 22677 21804 21849 21504 22148 21783 22535 21703 22271 21354 22119 21817 22665 22136 22256 21302 21962 21678 22263 21781 21297 21548 21720 21847 22603 22227 22208 21463 21961 21841 22275 21737 22105 21464 21830 21672 22667 22336 22263 21296 21628 22070 22517 21768 21475 21207 21249 21819 23065 22910 22649 21362 21203 21817 22587 22033 21843 21419 21132 21516 22953 22964 22457 21816 21191 20963 21915 22387 22031 21928 21131 21620 22000 22589 21952 22273 21476 21864 21849 22056 21847 21747 21547 21895 22061 22496 22218 22004 21451 21767 19598 21061 20712 21170 20795 21060 21205 22016 21411 24637 22561 22513 22090 22649 21892 22204 21621 22149 22020 22647 22056 21979 21383 22225 21762 22135 21446 22032 21880 22791 21909 21905 21408 22279 21733 22139 21565 21812 21799 22679 22024 22266 21282 22120 21643 22403 21497 22053 21256 22348 22039 22266 21464 21955 21914 22381 21619 22144 21463 22632 22133 22584 21344 21916 21871 22217 21573 21869 21559 22444 22215 22179 21424 21884 21920 22046 21831 21920 21377 22263 22265 22483 21574 21786 21892 22297 21755 21654 20903 22266 22892 22424 21075 21048 21540 22506 22165 21680 21376 21205 22077 23119 22528 21296 21232 22220 22140 21707 21360 21108 21479 22871 22997 21974 20885 21571 22154 22083 21863 21440 21893 22126 22634 22084 22190 21575 22087 22023 22057 21432 21638 21654 22376 22260 22165 21527 22041 22004 22186 22145 21873 21764 22647 22087 22053 21508 22393 21837 22090 21583 21849 21771 22542 21911 21913 21395 22125 21911 22199 21305 21832 21533 22680 21984 22304 21280 22307 21860 22279 21528 21799 21655 22512 22064 22070 21309 22272 21713 22150 21333 22095 21847 22596 21618 21872 21663 22289 21747 21815 21549 22570 21821 21989 21431 22420 21547 21854 21484 22035 21989 22657 21637 21710 21632 22201 21585 21969 21596 22418 22112 22209 21488 22178 21804 22019 21599 21797 21741 22537 21918 21904 21390 22051 21747 22041 21444 21177 21331 23005 22728 21835 20914 22167 22329 21840 21760 21233 21463 23063 22901 21719 20887 21989 22272 21985 21347 21187 21133 22293 22968 22777 21287 21123 22183 22168 22032 21655 21710 21866 22439 22214 22225 21555 21899 22040 22155 21704 21648 21471 22281 22175 22263 21464 21688 21754 22189 21630 22186 21361 21911 22022 22616 21654 21799 21555 22307 21671 21600 21174 22029 22049 22570 21446 21698 21555 22326 21539 22214 21424 21722 21597 22603 21873 22203 21210 22055 21910 22242 22136 21975 21285 22291 22004 22572 21511 21832 21618 22436 21463 22203 21335 22215 22164 22501 21332 21910 21684 22330 21570 21927 21295 21970 21785 22816 21682 21856 21490 22371 21828 22129 21507 21890 22028 22551 21889 21783 21763 22185 21594 22103 21420 22005 22077 22454 21488 21811 21733 22221 21623 21758 21090 22333 22514 22590 21333 21318 22162 22409 21621 21534 20741 22232 23081 22658 21033 21411 22083 22210 21581 21446 20895 22255 22932 22541 21764 21127 21160 22263 22249 21811 21436 21116 21760 22852 22491 21603 21819 21722 22188 21717 21922 21540 21678 22182 22343 21726 21876 21570 22181 21704 4311 9368 11963 13377 14455 14045 14653 15122 15666 40217 30024 26032 22264 22021 22653 21720 21833 21541 22161 21469 21856 21209 21581 21784 22451 21591 9895 10815 15305 15780 16962 16679 17970 18048 18609 17593 34642 31542 27003 24254 23971 22602 23018 22432 23374 22283 22663 21813 22804 22096 22560 21784 22205 2208 14471 16660 18203 17949 19556 18929 19721 18848 19822 32793 27358 23976 23331 22496 23056 22203 22616 21716 22453 22471 22988 21817 22331 22007 22731 21888 11753 16940 19592 20092 20581 19794 20718 20713 20823 20192 27072 23898 24303 23397 21922 21417 22967 22169 21832 21106 22312 23223 22651 21105 22289 22396 21933 17095 19632 21371 22383 20780 20569 21516 21848 21047 28554 24144 23090 23036 22021 22183 22188 22468 22123 22231 21865 22010 22344 22713 22275 21958 21737 22547 21952 22216 21855 21915 21936 22720 22215 22113 21619 22535 21883 22217 21534 22286 22277 22858 21719 22119 21862 22647 21693 22429 21424 22600 22128 22813 21453 22208 21799 22534 21730 22010 21534 22784 22123 22528 21480 22551 21798 22385 21688 22197 22013 22941 21996 22121 21649 22647 21682 22305 21194 22213 21913 23016 21940 22217 21504 22555 21803 22285 21573 22087 22036 22755 21911 22067 21656 22416 21936 22259 21768 22008 21819 22830 22210 22255 21397 22214 22208 22096 21370 21296 21357 22938 22877 22011 20871 21984 22297 22016 21209 21257 21760 23277 23012 22242 21017 22233 22294 21904 21161 21883 22988 22903 21792 21735 22363 22055 22217 21692 21852 22293 22644 21888 21842 22123 22295 21805 21909 21723 22666 22159 22166 21528 22144 22169 22202 21931 21873 21977 22775 21733 21965 21888 22384 21629 22067 21757 22837 21867 22088 21745 22549 21556 22219 21468 22770 21955 22086 21680 22418 21607 22192 21386 22753 22007 22063 21637 22529 21496 22087 21745 22837 21526 22274 21856 22221 21331 22529 21983 22382 21373 22653 21696 22037 21800 22790 21556 22154 21948 22297 21579 22221 22137 22469 21419 22464 21646 22064 21769 22869 21708 22089 21977 22279 21608 22155 22289 22672 21399 22028 21974 21696 21024 23069 22393 21477 21362 22573 21602 21159 22256 23152 21034 22225 22148 21624 20921 22573 23028 21679 21320 22595 21799 21892 21115 22992 22951 21707 22131 21888 22200 21508 22442 22201 21821 21894 22297 21474 21748 22163 22534 21607 22217 21858 22476 21486 22666 22119 21944 21991 22116 21514 21959 22212 22559 21509 22409 21614 21953 21987 22720 21496 22324 21825 22211 21435 22811 22085 22077 21712 22513 21663 22115 22059 22289 21574 22506 21083 22005 22023 22804 21416 22288 21696 22251 21239 22743 21944 22027 21800 22336 21472 22102 22045 22585 21384 22625 21708 22199 21307 22728 21973 22072 21612 22430 21675 21852 22016 22611 21704 22072 21932 22221 21425 22320 22224 22255 21511 22548 21568 21966 21860 22814 22151 21701 21813 22377 21730 21225 22475 23006 21006 22060 22140 22030 20928 22321 22967 21906 21058 22564 21742 21612 21242 23243 22389 21256 21853 22391 21446 21271 21428 23153 22521 21504 22200 21992 22145 21388 22225 22451 22223 21600 22124 21960 22027 21581 22136 22352 22120 55 5305 9619 11664 12078 14034 14046 14286 14052 15139 39435 30153 25601 25073 23804 23266 7655 14235 15523 16864 16612 18153 17808 18403 17349 41379 29463 26385 23891 23484 23040 10476 15323 18157 18456 19555 19333 19546 19513 20578 41208 29071 25110 24391 22809 22827 10946 18151 19373 20164 20116 21095 20043 20740 20503 21610 27741 24597 23191 23311 22311 14689 19557 21324 20609 21527 21376 21629 21143 21456 21640 26931 23104 22962 22530 22646 21724 22312 22423 22969 21797 21791 22081 22615 21248 21496 22215 23566 21824 21372 22086 22557 21945 21404 22210 23280 21655 21415 22117 22383 21772 21356 22620 23224 21460 21653 22401 22254 21542 21560 22572 22371 22044 21856 22481 21925 21929 21885 22633 22272 21857 21954 22389 21780 22091 21840 22735 22029 21997 21999 22291 21893 21812 21847 22784 21998 22073 21867 22386 21713 22080 21744 22763 21931 22035 21835 22453 21684 22290 21468 22773 22030 22272 21641 22631 21652 22311 21353 22647 22209 22485 21383 22456 21615 22377 21385 22576 22123 22408 21443 22471 21672 22610 21411 22591 22208 22504 21297 22613 21559 22299 21405 22804 21927 22099 
21625 21481 22242 22101 22173 22053 22327 22148 22304 22149 22450 22052 22304 22032 22410 22150 22368 22017 22424 22102 22304 21948 22174 21790 22033 21563 22040 21528 22279 21472 22167 21635 21975 21531 21974 21553 21945 21383 21854 21329 21724 21233 21728 21088 21661 21174 21696 21172 21755 21243 21760 21231 21697 21160 21720 21152 21706 21271 21734 21085 21688 21309 21845 21450 22081 21619 22206 21785 22087 21824 22084 21872 22137 21832 22252 22408 22018 21569 21376 21897 21888 21719 21620 21395 21993 22209 21851 21589 21413 21952 21825 21861 21401 21817 22068 22278 21574 21509 21672 22085 21543 21816 21213 21842 21931 22472 21673 21682 21510 22207 21600 21774 21264 22317 22007 21926 21203 22119 21632 21894 21394 21746 21751 22496 21689 21696 21535 22253 21520 21808 21273 22293 22006 22329 21205 21872 21687 22241 21361 21725 21373 22374 21861 21845 21168 21745 21729 22007 21432 21816 21272 22348 21934 22396 21352 21856 21620 22290 21414 21988 21136 22044 21814 22404 21613 21712 21432 22165 21601 22071 21321 21763 21879 22368 21762 21637 21457 22234 21523 21844 21204 21946 21989 22439 12640 16734 18116 19307 19061 19399 18848 19720 20838 42789 25051 22315 22215 22876 21815 21900 20930 21457 22404 23109 22035 21015 21184 22085 22215 21665 21296 21068 21744 22919 22663 21856 20753 21239 22254 21962 21456 21324 21668 22139 22322 22001 21667 21260 21866 21927 21737 21393 21712 21368 22032 22181 22218 21763 21440 21486 22151 21859 21858 21475 21463 21800 22224 21868 21605 21305 21778 21789 22120 21421 21861 21345 22158 22072 22305 21459 21677 21598 22180 21466 21860 21237 21693 21687 22477 21742 21839 21251 22194 21687 22001 21257 21614 21784 22455 21697 21758 21353 22186 21532 21960 21233 21861 21816 22405 21381 21665 21570 22211 21492 21948 21303 21977 21885 22490 21583 21754 21436 22383 21484 21976 21122 22241 21928 22306 21437 21639 21545 22135 21476 21869 21200 22230 21952 22074 21146 21664 21634 22176 21548 22032 21184 22198 22201 22215 21104 21527 21958 22199 21367 21321 21352 22379 22816 22044 20569 21399 22160 21993 21365 20998 21776 23025 21706 20845 20758 22176 22000 21568 21074 21353 22562 22676 21211 20941 21900 21852 21798 21546 21636 22021 22312 21766 21424 21794 21965 21709 21728 21365 22103 21998 8154 18300 20200 20327 21243 20341 21095 21267 21149 20514 28103 23354 22501 21772 21711 21498 22280 22021 21997 21193 21853 21761 21876 21339 21741 21704 22453 21817 22048 21169 22058 21787 22043 21362 21711 21592 22375 21859 22003 21248 22104 21643 21962 21600 21592 21473 22363 21873 21818 21324 22147 21774 21884 21360 21824 21946 22518 21737 21879 21309 22215 21515 21905 21337 21877 21889 22419 21421 21713 21684 22023 21918 21584 21530 22401 21977 21798 21253 22070 21747 21857 21206 21628 21889 22764 21338 21031 21181 22401 21479 21607 20889 22574 22671 21440 20700 22274 21942 21648 20901 21757 22785 22522 20861 21283 22128 22179 21404 21409 21067 22720 22800 21674 21408 21873 22116 21569 21777 21472 21680 22057 22208 21689 21475 21628 21983 21674 21902 21440 21677 22081 22096 21379 21516 21760 22107 21487 22021 21231 22258 22060 22202 21329 21778 21608 22185 21510 21787 21095 21870 21989 22464 21588 21728 21344 22322 21683 22012 21447 21680 21468 22440 21952 22081 21175 21930 21755 22107 21497 21924 21315 22308 21960 22323 21482 21801 21570 22264 21376 22120 21221 22200 21897 22352 21304 21763 21460 22251 21438 21840 21159 22048 18369 21076 20518 21307 21225 21431 21083 21233 21472 32986 23695 22304 21593 22272 21665 22136 20893 21571 22568 22784 20952 21059 22209 22513 21616 21771 20864 21984 22848 22744 21047 21016 21863 22205 21351 21164 21413 22968 22528 21643 20745 21415 22120 21657 21425 21399 21893 22208 22114 21607 21556 21868 22057 21784 21719 21453 21672 21863 22400 21721 21602 21491 22125 21638 21790 21543 21496 21748 22418 21824 21807 21312 22104 21740 21958 21465 21532 21437 22407 21942 22021 21176 21945 21669 21930 21533 21670 21768 22418 21902 21953 21171 21845 21707 22067 21815 21784 21580 22593 21837 21712 21430 22224 21699 21877 21177 21920 21776 22413 21508 21754 21290 22342 21608 21973 21314 21671 21587 22365 22017 22133 21299 21828 21711 22197 21421 22032 21174 22265 22030 22106 21304 21704 21700 21991 21544 22134 20982 21496 22201 23020 21821 21035 20855 22120 22280 21940 21395 21776 21068 21153 22225 23060 22355 21360 20609 21446 22104 22164 21351 21456 20776 22135 22807 23008 21989 21330 21687 21897 21900 21568 21612 21310 22077 22213 22068 21468 21568 21699 22041 21718 21782 21745 21527 21426 22112 22082 22337 21623 21703 21371 16003 20780 21586 21127 22112 21008 21651 21775 22189 21675 24272 21760 22062 21861 22369 21579 21989 21376 21773 21735 22595 21953 21898 21272 21866 21732 22119 21463 21954 21216 21956 21666 22464 21913 22272 21271 21742 21632 22118 21601 21891 21334 21658 21484 22489 21925 22252 21287 21787 21360 22238 21664 21943 21240 21642 21360 22351 21977 22273 21341 21600 21415 22087 21817 21936 21496 21835 21155 22007 21965 22456 21920 21763 21255 21720 21965 22273 21891 21751 21536 21075 20829 22165 22529 22945 21781 21030 20704 21762 22248 22486 21959 21740 21297 21049 21077 22455 22743 22876 21656 20806 20920 22088 22236 21634 21804 21357 21497 21811 22368 22181 21896 21395 21521 21802 22010 21856 21712 21625 21572 21467 22153 22212 22167 21441 21576 21576 22024 21749 21789 21671 21593 21575 22340 22001 22136 21419 21587 21513 22193 21648 21874 21605 21632 21488 22359 22033 22150 21361 21757 21424 22253 21704 21946 21275 21684 21314 22193 21970 22406 21519 21653 21376 22240 21601 22148 21463 22116 21153 21895 21770 22376 21696 21682 21284 22136 21687 22220 21395 22032 21201 22278 21896 22349 21509 21690 21290 21993 21720 21967 21527 22201 20382 21559 21613 22341 21792 21861 21093 21805 21677 25319 21914 22184 21297 21851 21751 22413 21878 21607 21188 22053 21952 21893 21480 21277 21554 22952 22468 21548 20608 22080 22311 21854 21107 21006 21590 22871 22702 21568 20629 21648 22236 22171 21383 21479 20759 21838 22735 22811 21409 20864 21876 21900 21760 21604 21498 21966 22318 21991 21539 21683 21908 22025 21704 21573 21519 21933 22323 21936 21627 21428 22027 21676 21862 21643 21606 21973 22424 22074 21856 21218 21896 21774 21889 21355 21650 21574 22401 21959 21861 21258 22122 21728 22069 21465 21898 21157 22199 22000 22275 21324 21618 21606 22193 21465 21837 21184 22065 21968 22295 21397 21731 21376 22313 21497 21958 21481 21696 21822 22409 21708 21661 21256 22056 21736 22172 21393 21766 21211 22379 21969 22183 21174 21861 21715 22107 21400 21794 21187 22352 22035 22005 21220 22193 21819 21849 21600 21628 21604 22437 21760 21966 21171 22107 21711 21960 21317 21598 20839 22433 22619 22144 20665 21267 22161 22144 21195 21040 21147 22243 22896 22373 20736 21222 22124 22021 21490 20992 21441 22951 22435 21216 20749 22093 22011 21593 20941 22040 22272 21815 21597 21643 22095 21564 21771 21427 21971 22115 22048 21499 21624 21953 21891 21689 21589 21727 22409 21885 21605 21415 22126 21792 21763 21294 21879 21879 22455 21688 21597 21664 22221 21561 21952 21273 22006 21989 22266 21475 21596 21437 22198 21522 21961 21159 21999 21880 22449 21616 21609 21444 22138 21451 22263 21096 21784 21819 22508 21602 21859 21190 22120 21717 21990 21630 21759 21735 22449 21989 21832 21303 21836 21684 22159 21383 21796 21178 22208 21904 22336 21324 21749 21610 22147 21454 21828 21297 22071 22023 22400 21608 21620 21280 22136 21574 21854 21389 21760 21900 22506 21532 21639 21413 22183 21762 21808 20945 21213 22064 22759 22620 21892 20599 21130 22117 22320 21321 21303 20913 22453 22808 22640 21628 20835 21241 22375 21923 21589 20945 21560 22535 22784 21477 20992 21458 22403 21847 21737 21623 21332 22133 22128 22040 21408 21646 21931 21888 21585 21683 21479 21970 22156 22153 21463 21596 21822 22113 21595 21684 21450 22215 22099 22009 21251 21765 21798 21856 21898 21616 21591 22449 21902 21714 21353 22092 21721 21943 21546 21675 21675 22369 21930 21975 21169 22184 21767 21879 21372 21604 21632 22373 21765 21904 21285 22220 21669 21993 21403 21894 21211 22005 21850 22371 21485 21671 21564 22192 21448 22209 21251 21874 21849 22547 21841 21963 21228 22250 21648 21959 21392 21597 21648 17719 19136 19637 19796 20728 20128 21015 19939 20372 32418 24983 22896 22249 21532 22246 21740 21978 21353 21669 21989 22816 22340 21511 20782 22043 21966 5813 18367 19852 21274 22353 21248 20229 20711 21783 20879 27485 22551 21745 22161 23223 22596 21373 20716 22115 22296 21847 21469 21075 21456 22841 22601 21700 15199 19959 21262 21121 21490 21021 21682 21863 21582 21221 24492 22841 22254 21745 21856 21548 22263 22137 22088 21297 21782 21847 21819 21668 21567 21616 22369 19108 21003 20945 21760 21492 21655 21152 21719 21878 34937 22730 21954 21674 22247 21535 22114 21148 22297 21984 21997 21190 22085 21624 21911 21207 22187 22007 21334 20937 21718 21579 21865 21225 21604 21575 22379 24768 22146 21488 22392 21544 21707 21122 22009 21763 22523 21668 21845 21275 22146 21653 21992 21562 21738 21728 22488 22016 22186 21251 21958 21742 22003 21280 21626 21775 22428 21663 21603 21451 22241 21658 22281 20824 21272 22329 23008 21665 20892 21292 22418 21640 21569 20759 21740 22728 22639 20964 21220 22105 22127 21388 21128 21099 23002 22650 21392 20781 21956 22006 21617 21865 21289 22145 22187 22080 21472 21434 21780 22048 21579 21634 21321 21969 22171 22240 21461 21590 21729 21984 21539 21873 21419 22119 22029 22344 21628 21657 21593 22157 21699 21831 21263 21853 21860 22349 21586 21650 21376 22240 21531 21928 21299 21872 21963 22408 21549 21624 21496 22238 21559 21655 21226 22214 21977 22144 21265 22000 21668 21894 21399 21665 21458 22513 21735 21711 21278 22209 21548 21813 21147 21992 22040 22156 21278 21952 21728 21956 21539 21765 21325 22223 22048 21912 21322 22088 21627 21861 21116 22000 22169 22135 20992 21808 22103 21687 20992 21620 22600 22676 20724 21513 22184 21561 21078 21754 22791 22873 21072 21237 22144 21641 20935 21805 22767 22003 20650 22180 21649 21296 21261 22209 21817 21354 22133 21745 21744 21554 22230 21804 21516 21895 21852 21529 21753 22133 22228 21344 21904 21807 21545 21321 22261 21770 21649 21830 21925 21576 21833 21915 22341 21250 21929 21803 21864 21336 22132 21907 21763 21565 22061 21440 21817 21496 22432 21530 21793 21826 21965 21175 22080 21933 21984 21190 22211 21477 21900 21385 22312 21805 21817 21384 22123 21553 21632 21626 22443 21480 21863 21746 21963 21128 22076 22019 21971 21206 22282 21447 21664 21647 22466 21391 21771 21811 21808 21266 22338 21952 21721 21652 22018 21895 21613 21937 22050 21285 22227 21463 21159 21708 22880 21034 21304 22107 21680 20890 22312 22639 21058 21577 22100 21194 21712 22839 21572 21189 22349 21526 21289 21725 23051 21379 21330 22292 21549 20951 22160 22229 21410 21760 21781 22328 21419 21870 22171 21637 21565 22074 21541 21760 21661 22314 21655 21596 21891 21911 21661 21780 22187 22060 21239 22087 21637 21857 21372 22400 21706 21617 21555 22084 21623 21752 21778 22406 21300 21771 21728 21955 21232 22151 21973 21998 21143 22149 21513 21895 21267 22404 21840 21682 21568 22099 21475 21746 21691 22439 21431 21763 21691 22116 21431 21608 21688 22615 21520 21646 21605 22088 21477 21728 21479 22521 21452 21707 21644 22020 11904 18880 20027 20769 20009 20621 20564 20880 20430 20593 26372 24009 22176 22007 21944 7460 18624 20177 21239 22093 20704 20856 21306 21912 20898 26896 22679 23336 22865 21354 21059 19490 20522 20929 20726 21687 22485 21601 20444 21794 29624 23539 21418 22241 22998 22130 17653 20803 21614 21259 21463 21609 22083 21719 21334 21703 23463 22501 21680 22013 22458 18455 21202 21607 21728 21428 21568 21935 22125 21409 21740 22929 22176 21712 21760 22080 22301 21349 21840 21878 21904 21673 21745 21759 22478 21604 21706 21643 22186 21411 21704 21663 22474 21579 21655 21799 21921 21756 21613 21847 22363 21270 21913 21728 21984 21410 21728 21766 22289 21317 21991 21764 21854 21127 21788 21925 22264 21179 22033 21692 21861 21357 21840 22071 22079 21262 22008 21735 21850 21172 22111 22008 22135 21181 22026 21765 21888 21205 22139 22065 21991 21165 21891 21917 21751 20966 21949 22369 22768 20992 21284 22119 21901 21353 21142 22349 22934 21418 21049 21997 22249 21346 21046 21993 23089 21859 20858 21984 22069 21329 21040 21997 22199 21974 21321 22062 21788 21829 21467 22203 22108 21593 21656 22061 21647 
34321 42647 41273 39787 40560 39168 42106 40138 41570 40237 43239 39161 41521 38720 42776 40267 42316 38680 42861 39857 41547 38198 40494 36395 38646 33800 38611 33117 41222 42728 40610 34551 38258 33356 38086 33456 37783 41816 37240 41137 35720 40201 35539 38472 34899 39554 35074 39445 36122 40537 35712 40455 35225 39303 35468 39116 35354 40532 35785 38747 35053 41024 36960 42437 39444 34432 40696 36227 39439 36440 39216 37057 40021 36667 41238 36933 40407 36932 41372 36786 40976 35115 39444 36256 40074 33995 37283 41994 36262 41856 36155 42339 34935 40997 36932 40023 33129 41556 40736 39723 39008 37100 39331 37472 39120 35853 38668 37576 39558 37653 39865 36880 40168 42021 38985 37771 39994 39992 34274 37143 41722 35880 35879 43433 35414 34875 33274 41177 33043 36013 40491 41623 38840 42037 40241 37088 35136 40940 41709 35862 41766 42647 37264 36832 39364 35785 35398 38689 42279 36609 40413 42273 38106 42777 41683 36976 34221 41177 42266 38546 39051 38962 36502 42496 34628 35041 42055 40439 34168 39196 41217 35943 37261 42145 35899 34339 42267 41260 33280 36520 39872 38018 38477 43213 30892 32820 37518 40328 37863 41244 35293 34327 35873 46080 40488 42008 41091 37702 36597 37268 36913 42400 42764 40272 38936 38040 39557 39451 41012 34872 40541 38631 35629 37904 35191 36697 34868 40375 41507 38304 42400 41422 34898 40008 41866 38714 34872 40274 37184 37772 35732 41709 35385 41481 38724 40498 40992 35948 42070 43227 40409 37122 36871 42738 43008 36405 40690 37264 34150 40811 36013 36161 39660 42391 37250 41290 40397 39296 41648 42810 35299 34032 40150 42816 37169 40423 35394 35048 43456 36145 36883 40208 40600 35329 38434 40448 34496 35820 43264 35368 35975 41432 40666 33329 37831 40292 37121 36362 42604 41951 34893 33418 40552 43053 38249 41101 38448 37478 43634 34365 35777 42249 42992 43203 38457 38955 41095 37782 41565 42702 34773 33240 39902 42823 37468 39765 41074 37954 39306 39411 34661 34106 40007 33557 38357 39580 40711 40852 41079 38939 33280 37837 40784 41964 41377 41587 42787 36832 38912 33102 41735 40160 38656 41716 37815 35762 39051 35385 36176 34998 39936 38528 33528 38292 41533 33986 34995 40097 37338 37351 36916 36213 33320 34085 38433 41684 36016 41930 36265 38208 35479 35296 41541 39874 38775 34598 39648 39918 41384 40679 41497 39091 40567 39626 32282 42178 42809 44072 36201 35485 42912 41480 38800 38733 39936 37127 35644 37048 41458 36017 35084 43117 36786 38733 39572 39137 36269 38946 41621 35731 33777 42352 37208 38631 40107 39628 34688 37992 33904 33723 42400 42653 37336 36503 41132 40132 36157 37272 41410 36512 37895 43984 36018 37272 41104 41059 33253 37152 41335 37376 37121 42796 42560 35514 34832 38601 37661 33680 32941 42240 38525 36286 40272 39317 35920 36817 40016 34577 36984 36352 41280 38319 39892 42610 43217 34542 36395 34076 35219 42039 34745 40983 38064 34393 36567 35987 36216 43960 36755 40622 39848 40523 42146 42145 38724 35632 36324 34860 41664 37251 39656 33688 35716 42425 35010 38948 40609 35271 42634 34705 38455 34944 37365 42133 35257 39125 39415 41744 33200 35339 39668 43244 38855 40592 41373 39287 40788 41289 36049 34020 40321 33034 36021 38869 37261 38432 43176 34128 35236 41072 41905 35241 38666 42591 35047 42544 43240 38066 39284 39850 37812 36033 39701 43184 37825 41037 41732 38201 41905 43097 36529 33514 41129 41607 39913 40328 40697 37477 42004 41089 35921 42421 41580 42704 36811 39544 38821 40372 38645 32401 40808 40420 42544 39013 40332 42668 33259 36138 41360 34185 40857 34866 39720 36797 33625 33683 36015 37168 38331 40660 43981 34453 35841 35924 38088 36999 36011 38323 37815 37120 40832 41751 39754 42169 38647 33325 34407 34752 42007 39923 34823 42054 42212 37472 40535 39788 34392 33247 36909 39033 36048 35501 42498 35009 37011 42363 35735 33921 42728 40218 34553 36111 33356 42689 35968 42624 36582 36526 40768 39666 35847 37993 42704 33451 42240 42989 38144 38658 39657 38025 34863 37632 33312 34628 35603 42593 37714 37938 39650 36898 35356 39093 36573 35932 33717 34006 36674 35152 42133 40929 35366 37140 39712 37504 35770 42768 33050 35717 40666 42192 34342 38128 40972 35104 33774 42252 38681 40057 41016 36648 35498 40547 42447 38777 39728 41532 39002 39720 40983 35317 35008 38456 33322 39744 37774 42912 40920 39323 36768 38183 36371 39634 41331 37962 41882 35944 38448 39351 40902 39489 42344 41673 33481 42160 39726 40252 41741 42582 35414 39970 36872 38793 38544 41178 35335 37223 37363 33456 34064 40938 39575 40896 39283 42796 33728 34995 38758 35502 35948 35635 33120 41857 39704 39328 42004 34720 35221 41717 36741 35310 33687 39008 39489 37683 34582 35993 40570 35163 42240 35769 39125 37072 42294 34144 38321 41449 36185 35680 34224 37778 37350 40452 37184 35502 39812 42860 38144 39989 38025 34689 42959 37785 41064 40816 36022 34052 39609 34122 37088 41274 34857 42729 43911 37961 41316 41025 36360 41351 41360 34772 37891 40401 34605 41250 42530 38538 41216 41685 34063 41984 39687 36608 37597 42944 37019 39409 38832 38310 43227 37696 35792 40352 35497 38160 41177 37409 35987 32947 38376 36067 40136 33483 37976 36082 37986 34424 35483 41024 43768 38464 35808 40708 38454 38642 43385 36451 37515 34608 35500 36721 39255 41176 34451 36170 41616 43268 36651 42137 40656 37383 41833 33175 36067 38640 36816 35167 34345 33448 42528 40304 40817 40519 42432 33912 33484 38335 35904 36176 34873 33879 33633 41735 38702 40003 42374 34144 32748 40252 34502 36961 34131 33976 42496 42596 38905 40128 41664 36267 41927 41587 35364 37863 40753 35104 40784 40618 38248 42703 33493 34433 41224 41085 34184 39776 42860 39889 39444 37452 35854 42312 35223 34800 40466 40044 35283 40788 42019 38742 39936 41389 37397 42262 33141 34908 40647 38625 35447 38280 33273 40436 41896 33880 34186 41876 36179 36972 38800 36480 35000 42866 37777 40355 40918 37125 35945 42768 37476 34283 39524 39082 37863 37312 42707 40981 33544 38048 43321 33738 32983 38874 41873 37237 39000 37913 33936 37368 35689 33399 33447 34132 40908 40576 41964 43146 35424 36694 36132 36778 41907 36204 37047 37341 35568 33944 42829 38468 41953 38775 33360 34799 37233 38643 35244 33609 33005 37660 41859 37827 34576 41986 38967 35013 36919 34552 34000 38082 42820 39520 36883 40028 37318 36016 37073 41640 34680 33562 42285 38384 37079 40352 39937 35500 39152 42762 37560 39459 40813 38560 41328 41370 34401 33989 40312 42835 37078 39536 39136 38071 41664 42116 35826 41313 41913 43313 38329 42904 35204 36531 42658 35584 34763 40137 39048 35663 40256 41871 36013 40112 42723 38365 40608 39815 37127 35376 39660 41937 36299 39728 42086 39003 38745 40164 40589 36754 36853 33844 34282 33865 42839 35814 38189 39657 39839 35661 37928 41136 34353 35992 42779 35024 39686 34256 40294 40208 39916 40122 38112 39442 41196 37777 42496 34807 40071 39976 38741 42880 37632 42240 38609 43091 40234 35121 39461 38932 34072 37109 38709 41088 36739 34131 34400 39555 33751 35810 42132 38410 39794 38865 43239 34596 37764 37262 35106 33833 35570 42596 37673 34181 41985 40181 36111 35729 40837 37488 37336 43357 35295 34058 34390 40855 33784 37615 40586 38776 38509 41496 42992 34320 42293 40844 33145 37910 39600 38833 37223 43091 34415 34036 42080 40232 42744 41687 38970 36032 36528 43816 34325 36852 39782 39810 35549 38385 34619 36038 35668 42988 38712 36625 40993 36841 34904 40232 41943 36337 39658 40616 37369 41801 41397 36034 34128 39840 42752 36759 40736 39456 38810 42452 34361 34117 40275 40048 33864 36864 41850 35745 37296 43808 33550 34338 41888 40736 35833 36122 37079 40192 39041 36443 34652 37059 33501 38897 39843 41764 41364 41236 36898 43181 36870 34736 34369 35857 40368 42676 37895 33975 36979 33437 33389 35989 42752 37612 42439 42857 37189 35671 34405 40994 40141 39856 38884 41876 34821 37714 37032 33778 34855 42728 38312 40164 40231 42880 34305 36496 39597 34231 34816 42291 41120 39722 38828 40352 35937 36144 36714 37212 34112 33869 42884 37728 35312 41383 39635 35596 37937 33411 34798 34856 42144 37944 38408 39552 40449 36064 37309 41760 34245 33969 42260 36048 37176 40693 41006 35009 38407 42104 37516 40184 38760 36928 42394 43293 35232 33524 40176 42504 40805 40449 37193 36864 33656 36504 38176 40336 41344 34565 38040 41642 34355 34144 33539 38087 33775 35229 34701 38752 37911 37152 41398 47625 39714 37717 41258 33396 40973 35913 38244 41573 35013 38332 36624 41912 33241 35282 38829 38330 29942 40244 36160 40487 42249 40320 40134 34875 36012 36553 45707 34296 35559 39969 41499 34464 41751 34979 39588 41537 37134 42768 38820 42392 37328 34416 34982 38008 37483 40528 39064 42886 38285 34928 37032 33920 40045 44882 37441 41402 35904 36696 33367 41276 40210 39472 40870 36167 36864 36597 34650 33736 33906 42103 38252 37856 37127 35526 42769 35001 39090 35607 37138 33724 35740 37815 34888 41163 33664 39466 39434 41630 38391 38720 39872 39469 34436 37474 40140 40696 38944 41363 37296 35422 33776 36928 40256 34169 33650 42408 36887 39859 42840 42850 33561 35269 38819 38743 35829 44034 35044 36724 40659 40004 34759 38288 33636 35508 35281 43384 38624 40554 40427 38170 35891 38567 40537 34586 35995 42861 35231 34008 42376 41248 34888 41124 35941 40367 42068 39026 34803 36456 40738 42848 34640 33440 34977 35587 35697 35048 37264 40074 39745 40228 41921 39212 39040 38988 35161 41510 35624 37815 38677 34296 36933 40736 40023 40722 39287 42628 42587 36130 38691 33963 34113 40960 38253 40448 41073 42805 34225 35330 38109 33323 36891 42194 40093 38932 42075 34708 34553 33844 40064 35316 36649 40599 37138 36889 42250 34034 34313 41216 41080 33480 37458 40897 37101 38185 42630 33824 34147 42696 41423 33880 34656 40115 40886 38472 39842 40490 38513 34768 37169 41984 34892 42296 44077 36080 35496 40613 40784 33607 36308 39389 38464 38807 40218 40860 37933 35408 37824 33304 35637 41176 41264 38935 37500 41127 39473 34665 36903 39096 38454 40343 40249 37504 36160 39648 35278 37292 34221 34122 34995 34666 32758 40145 33755 38454 35926 36464 37464 38380 40437 39910 34605 37058 36384 36548 38608 33964 40128 34625 40528 40660 40796 36667 41475 40167 35849 35529 33271 40785 36480 32928 37169 36906 33148 35699 39895 41006 41383 37387 36555 33408 40914 41544 36064 34416 36452 37639 33673 36495 37599 42070 40388 37861 36411 36936 41191 40031 37571 35799 33655 39047 42241 36743 42859 43042 33472 35912 36372 38226 39812 39200 37984 38241 39861 40839 43001 37641 41704 41824 36656 36480 41536 40128 33551 33966 34243 43029 43051 37376 35703 38144 39049 39363 38663 38281 40032 41466 42752 34840 34599 43060 42291 36186 36354 36137 40296 42013 38002 35528 34412 38313 37346 34352 37606 38871 40793 41118 42933 39832 35408 37304 38113 40868 39910 34932 36426 41542 35335 38178 33792 39321 39964 35267 37081 33608 39618 42336 33381 40585 35767 39339 41760 41312 41577 33760 37216 39939 41126 42112 35755 35959 41688 42467 37432 40406 34565 33602 39085 33409 35385 34720 41600 34957 33927 37063 37585 34841 35773 40504 39259 40613 39638 34534 36743 41703 42592 35537 34135 33318 39075 34565 35665 35767 42576 41057 36133 35324 37938 40182 40247 38388 38717 39431 40113 33100 37189 40448 42672 36816 34878 33312 39352 42869 35959 35127 43027 42705 36025 35144 39562 42501 34353 34840 34548 32695 34370 33988 39172 42880 35648 42800 44310 42882 35648 34416 38358 33464 35316 37965 35120 37665 33653 32648 36009 42201 33612 43465 39978 40304 38886 37888 27015 32237 39265 40592 39744 34533 36032 40874 37575 36560 39024 35431 42144 37527 41548 38400 32043 32145 36660 34793 35009 43445 34318 42194 36248 47716 45078 42532 41254 39060 39941 33051 35376 34265 40336 42870 34456 39212 35645 41185 35514 43673 44036 35112 38752 43367 31236 39571 34353 35260 42021 33664 37818 40013 42055 35945 37882 40203 35305 35450 39009 41786 41696 36736 37192 37226 34838 35591 36069 43520 34357 35131 34437 40378 42167 35384 34833 43275 34194 34596 36189 37498 35904 34293 36760 42391 40770 37680 35385 38129 41952 35572 35718 41280 41280 38724 35766 36954 39156 36184 37622 41344 40008 38770 35226 36931 41652 36731 39305 39626 40640 38727 35840 36801 39515 39977 38720 40170 40000 38754 35888 36948 40000 40247 39202 38656 39728 37323 37695 35992 37403 38058 42305 36473 37360 40567 40025 37616 41542 39425 42337 38327 42200 38496 38636 41312 41520 38432 38534 39767 37122 36280 38128 39271 41222 38149 38665 40804 38416 41178 39382 36224 36544 42704 41040 39856 34139 34400 39078 34818 
23804 23620 23510 23508 23225 23429 23076 23572 23511 23697 23512 23692 23321 23671 23136 23453 23287 23575 23264 23605 23080 23559 23104 23516 23254 23639 23225 23664 23172 23691 23223 23831 23420 23836 23392 23889 23372 23794 23349 23947 23576 24032 23539 24147 23580 24119 23692 24325 23565 24197 23655 24194 23757 24303 23788 24333 23717 24132 23715 24217 23718 24116 23758 24173 23738 23975 23661 23997 23593 23730 23496 23728 23414 23721 23493 23764 23453 23707 23344 23591 23125 23437 23155 23303 22808 22988 22657 22934 22684 22919 22693 23050 22811 23124 23223 23397 23351 23808 23851 24010 23897 24039 23842 24165 23991 24106 24044 24164 23728 23988 23779 23951 24023 23519 23680 23447 23737 23443 23643 23505 23575 23385 23479 23275 23448 23317 23481 23328 23541 23297 23519 23333 23540 23265 23496 23314 23620 23398 23635 23304 23655 23217 23495 23225 22946 23092 23452 23292 23662 23698 23925 23730 23719 23130 24133 23872 24085 23198 23833 23586 24060 23380 23878 23155 23957 23931 24261 23345 23671 23589 24113 23496 24118 23260 23773 23879 24243 23424 23596 23573 24052 23467 23927 53 9847 12775 13652 13043 13719 14462 14882 14308 14410 34341 29559 28569 27493 25360 24896 25394 25767 24920 24825 24079 24408 25319 25532 24789 23713 23648 24832 24704 24069 23848 23557 24074 25164 24960 23860 23189 24081 24320 23898 23787 23796 23873 24182 24481 24074 23783 23702 24057 24054 24040 23740 23815 23405 23898 24267 24356 23776 23728 23501 24172 23798 23908 23626 23624 23936 24374 24055 23982 23350 23932 23803 24001 23492 23854 23319 24073 23932 24203 23364 23767 23632 24146 23568 23912 23310 23776 23727 24357 23581 23686 23351 24131 23497 23852 23296 23875 23821 24352 23301 23655 23479 24192 23473 24032 23183 24055 23859 24099 23136 23672 23447 24140 23386 24108 23111 23932 23776 24266 23226 23662 23568 24028 23427 23845 23168 24064 23809 24036 23206 23704 23639 23873 23383 23463 23381 24077 23826 24046 23178 23578 23655 23812 23345 23582 23155 24347 24325 23799 22737 23747 24058 23683 23168 22998 23438 24776 24359 23399 22630 24092 23841 23445 22915 23560 24257 24710 23680 22807 23197 24222 23462 23402 22855 24082 24608 23566 23371 23378 23892 23461 23735 23246 23717 23946 23874 23296 23529 23722 23672 23018 23438 10663 14969 15279 15898 16396 16872 16608 16829 17100 17767 29383 27012 25623 25741 24929 24959 24408 24366 24189 24860 24285 24197 23755 24484 23904 24151 23547 23961 23749 24618 23828 24001 23397 24215 23770 23993 23709 23748 23718 24558 23774 23792 23278 24215 23659 23940 23303 23712 23648 24252 23491 23537 23367 24195 23409 23981 23084 23707 23696 24276 23375 23623 23385 24060 23426 23887 23082 24064 23851 23879 23155 23932 23557 23693 23442 23552 23674 24166 23543 23489 23341 24057 23421 23758 22793 23913 24363 24448 22934 23121 24012 23813 23433 22989 23915 24856 23537 22699 23401 24185 23234 23135 22944 24505 24460 23648 22601 23260 24014 23553 23095 22874 23415 23948 23898 23391 23417 23399 23873 23438 23162 23146 23783 23904 23830 23279 23571 23572 23818 23303 23604 23188 23863 23908 23781 23175 23456 23593 23675 23264 23598 23210 24008 23849 23991 23160 23485 23453 23854 23259 23609 22919 23711 23596 24150 23305 23499 22999 23772 23444 23633 23279 23432 23301 24198 23523 23793 22920 23832 23472 23758 22615 23470 23058 23884 23779 23924 23047 23587 23387 23896 23110 23651 23172 24088 23629 24048 23096 23573 23504 23864 4648 16167 17537 18677 18539 18546 18427 19356 18873 18976 29385 26834 25857 25778 24576 24135 24439 24869 23995 24036 23362 24737 24897 24249 23202 23212 24077 24167 23420 23512 23053 24585 24789 23959 22784 23801 24163 23633 23220 23179 23465 24528 24517 23474 23568 23649 23898 23520 23521 23229 23872 24009 23913 23427 23426 23674 23920 23543 23767 23182 23785 23764 24092 23505 23467 23297 23987 23492 23712 23233 23479 23569 24137 23502 23503 23130 23969 23431 23729 23309 23430 23398 24251 23557 23663 23075 24025 23429 23696 23174 23436 23389 24239 23606 23737 23076 23847 23505 23747 23152 23628 23639 24150 23309 23456 23456 23878 23192 23793 22945 23880 23565 24087 23225 23469 23104 23940 23360 23569 23698 23431 23170 24046 23677 23879 22976 23600 23471 23755 23180 23424 23105 24033 23664 23671 23041 23388 23396 24010 23400 23429 22679 23397 24237 24672 23882 23172 22467 22682 23408 24128 23491 23262 22901 22999 23839 24633 24271 23352 22409 23200 23930 23826 23137 23222 22698 23290 23834 23823 23507 23064 23484 23638 23613 23310 23323 23322 23843 23832 23724 23156 23235 23200 23758 23526 23520 23246 23509 23063 23554 23644 24002 17655 19350 19335 19930 20191 20661 20096 20518 20004 34459 25784 25483 24649 24492 23639 23941 23596 24223 23552 23879 23251 23676 23728 24205 23723 23877 23125 23623 23502 23917 23279 23776 23329 23560 23175 24155 23719 24039 23241 23489 23280 23975 23484 23744 23263 23578 23220 24272 23638 24144 23332 23495 23111 23849 23551 23657 23734 23508 23020 23990 23713 24092 23575 23561 23031 23625 23614 23854 23224 23730 22924 23397 23577 24314 24007 23665 22835 22820 22740 23792 23862 23804 23078 23340 22573 23352 24120 24672 24140 23932 22978 22692 22714 23820 23840 23573 23106 23183 22584 23641 24352 24605 23830 22707 23211 23584 23719 23420 23457 23306 23167 23383 23829 23808 23816 23425 23173 23241 23674 23481 23566 23790 23353 23080 23810 23683 23859 23432 23337 23184 23815 23456 23559 23324 23287 23024 23783 23719 23913 23239 23352 23110 23906 23358 23592 23593 23465 22974 23876 23601 24080 23222 23467 22962 23864 23443 23657 23141 23622 22982 23760 23632 24001 23124 23493 22836 23527 23304 23764 23128 23916 22932 23590 23584 24069 23428 23635 22976 23650 23377 23816 23079 23623 22855 23720 23584 24052 23511 23478 22894 23404 17643 21509 21297 21765 21412 21664 21728 22454 21924 21936 24608 24054 23763 24036 23399 23680 23065 23484 23686 24497 23776 23188 22738 23826 23858 23374 22928 22912 23660 24739 23789 22876 22477 23961 23801 23364 22977 22802 23651 24627 24071 23239 22436 23297 23683 23959 23144 23124 22736 23844 24290 23650 23301 23191 23743 23360 23454 23255 23239 23709 23875 23600 23213 23249 23682 23408 23399 23201 23522 23598 23968 23381 23252 23218 23835 23314 23543 23179 23308 23346 23975 23572 23434 22968 23812 23405 23528 23207 23364 23437 24142 23269 23397 23064 23672 23367 23791 23047 23489 22920 23908 23647 23721 22917 23564 23409 23772 23112 23648 22949 23783 23473 23997 23120 23358 23136 23981 23211 24026 23051 23575 23556 23991 23495 23656 22808 23790 23381 23740 23272 23466 23072 23984 23549 23645 22897 23552 23475 23648 22488 23274 23224 24060 23389 23362 23008 23720 23332 23499 23118 23408 23442 24041 23508 23380 22999 23640 23594 23692 23140 22909 23034 24389 24207 23345 22402 23573 23867 23712 23072 22990 22952 24493 24372 23363 22517 23783 23855 23315 22924 22956 23703 24620 23521 22591 23267 23907 23417 23047 23383 23684 23854 23155 23270 23607 23482 23323 23318 23106 23718 23753 23463 22968 23501 23432 23424 23223 23273 23585 23898 23363 23279 23280 23776 23206 23479 23085 23595 23591 23913 23104 23351 23357 23752 23201 23510 22931 23680 23581 23893 23048 23389 23222 23821 23079 23773 22883 23776 23561 24018 23196 23384 23311 23831 23185 23456 22906 23577 23476 24077 23291 23480 22955 23841 23200 23616 23213 23385 23319 24099 23497 23911 22753 23676 23361 23767 23089 23433 22913 23902 23587 23762 22936 23399 23357 23654 23245 23623 22950 23569 23623 24065 23224 23356 23311 23853 23270 23339 22915 23557 23627 24014 23213 22916 23127 24013 23343 23333 23132 22725 23250 24515 24231 23437 22396 23185 23891 23682 23381 22913 22577 23557 24277 24334 23024 22617 23245 24005 23213 23277 22653 23759 24320 24075 23153 23095 23634 23508 23553 23776 23314 23334 23824 23754 23526 23027 23341 23547 23469 23276 23334 23053 23824 23658 23620 22888 23495 23512 23519 23315 23328 23291 23977 23571 23541 22950 23660 23428 23492 23088 23346 23592 23997 23332 23399 22964 23836 23322 23592 23107 23328 23308 24053 23387 23447 23133 23825 23180 23520 23100 23369 23397 24087 23407 23461 22870 23624 23340 23891 23141 23600 22832 23712 23595 23968 23125 23344 23216 23873 23106 23702 22883 23419 23432 24053 23282 23351 22937 23808 23386 76 10022 12355 13156 13968 13330 13957 14201 14753 14370 33248 28703 27925 27190 26990 25844 25531 25088 25549 24853 25061 24409 24224 24850 25758 24648 23847 9622 15323 15831 16614 15831 16802 18030 18113 16648 16863 29747 28025 26703 25723 25067 24651 25537 25995 25237 24164 23656 24681 24866 24232 23909 23768 24328 16223 18248 18065 18477 19016 19209 19072 19136 19143 35088 27680 26181 25133 25207 25038 24749 24610 24444 24185 24859 24384 24272 23809 24437 24136 24119 23648 19072 20160 20951 20390 20417 20525 21175 20570 20953 27780 25897 25202 25110 23956 24366 24151 24416 24253 23948 23900 24559 23848 23853 23783 24311 23660 18663 21061 22480 22108 22185 21572 22507 21984 22253 21708 25088 24437 24656 23584 23912 23713 24293 23531 23987 23304 23912 23896 24426 23708 23765 23430 24212 23656 23857 23573 23616 23552 24296 23813 23712 23216 24168 23659 23812 23241 23831 24005 24368 23430 23297 23601 24336 23634 23415 22919 23977 24637 24551 23134 23014 23728 24217 23368 23304 23015 24443 24551 23655 22672 23671 24151 23651 23449 23027 24093 24807 24096 23249 23597 23722 23875 23361 23513 23443 24009 23968 23925 23356 23442 23744 23760 23424 23533 23173 23943 23859 23975 23210 23642 23691 23844 23218 23684 23090 23847 23833 24105 23315 23520 23512 23936 23250 23657 23080 23809 23693 24196 23184 23540 23368 24014 23321 23329 23113 23823 23693 24072 23320 23492 23415 23983 23184 23530 23210 24255 23592 23591 23266 23997 23485 23752 23100 23536 23614 24160 23227 23530 23415 23959 23237 23559 23329 24115 23637 23570 23091 23597 23575 23661 22997 23301 23524 24119 23462 23380 23449 23891 23309 23453 23160 24503 23842 22929 23275 24149 23175 23427 22848 24537 24076 22809 23069 24165 23291 23143 22704 24257 24323 22848 23187 24103 23126 23033 23329 24635 23305 22904 24007 23312 23226 23575 24035 23362 23415 23648 23540 23256 23584 23834 23488 23181 23754 23326 23446 23031 23997 23590 23281 23475 23680 23356 23577 23743 23704 23094 23801 23328 23388 23001 24077 23528 23351 23287 23842 23178 23319 23636 24007 23030 23600 23431 23636 22931 23805 23680 23510 23314 23774 23183 23395 23416 24086 23054 23522 23401 23648 23183 23398 23556 24000 23056 23596 23445 23684 22956 23910 23527 23527 23065 23971 23149 23348 23312 24066 23040 23653 23471 23569 22926 23956 23552 23348 23391 23647 23114 23345 23622 23774 22988 23819 23249 23466 23296 24107 23117 23396 23727 23312 22592 24268 24141 23031 23032 24023 23272 22804 24229 23947 22435 24144 23168 22754 23914 24477 22960 22960 23920 23287 22762 24106 24271 22656 23304 23769 23459 23113 23911 23597 23255 23478 23544 23346 23226 23692 23801 23113 23424 23546 23410 23167 23669 23728 23419 23020 23831 23226 23412 23243 23989 23256 23314 23464 23642 23175 23689 23630 23790 22949 23725 23367 23557 22903 23968 23474 23389 23182 23800 23108 23469 23287 24040 23154 23394 23437 23581 23017 23450 23527 23863 22897 23703 23303 23470 22853 23713 23655 23795 22905 23623 23351 23616 22898 23720 23594 23783 22873 23923 23296 23628 22857 23799 23559 23729 22926 8752 11868 12985 13044 14413 14343 14513 14111 15056 40336 30177 27613 27349 26573 26021 11673 15906 16334 17076 16327 17965 18343 18151 16904 17687 30483 28103 26521 25797 26496 12775 17361 18274 19490 19474 19089 19016 19721 20787 19755 28537 27141 26778 25385 24871 25008 20569 20910 20376 20950 20973 20999 20717 21116 21431 29159 25704 25633 25061 24320 24290 21945 22353 22259 22068 22697 22177 22348 21965 22859 22418 24924 24281 24800 24094 24344 23846 24656 24351 24081 23712 24491 23979 24193 23541 24432 24211 24321 23504 24332 23831 24162 23456 24357 24158 24068 23548 24321 23752 23435 23335 24428 23937 23981 23494 24265 23552 24108 23491 24423 23945 23832 23592 24296 23544 23977 23425 24416 23834 23704 23503 24203 23511 23910 23644 24384 23766 23652 23639 24039 23544 23677 23560 24358 23774 23609 23611 24075 23421 23708 23303 24400 23945 23260 23591 24258 23475 23537 22960 24600 24498 23430 22905 24294 23681 23401 22891 24137 24539 23970 22718 23769 24011 23603 23008 23751 24697 23873 22708 24034 23873 23110 23458 23511 24138 23641 23456 23731 23728 23401 23463 23928 23958 23318 23652 
21885 23184 22503 22754 22309 22791 22343 23138 22503 23269 22637 23031 22609 23006 22391 23062 22629 22946 22715 22993 22681 22773 22179 22229 21674 21770 21594 21807 21727 21857 21725 21842 21393 21515 21227 21400 21248 21459 21302 21249 20980 21312 21011 21235 21046 21333 21073 21170 21013 21631 22126 22091 22392 22008 22464 21912 22279 22058 22340 22006 22345 22256 22445 22418 22490 22341 22836 22368 22827 22287 22895 22471 22830 22369 22752 22320 22800 22159 22594 22116 22539 21972 22521 22027 22423 21968 22564 21488 22987 21968 22505 21842 22513 21783 22542 21740 22277 21672 22088 21623 22280 21504 22135 21550 22433 21919 22582 21838 22827 22126 22829 22027 22656 22082 22561 21934 22718 22244 22949 22112 22908 22304 23168 22366 23196 22605 23184 22580 23175 22508 22967 22338 23234 22445 23040 22469 22957 22383 23025 22453 23091 22498 23052 22491 23187 22907 23111 22824 23452 23479 23389 23096 23083 22626 22860 22542 22727 21779 21699 21385 21593 21079 21242 20960 21430 21021 21424 21282 21820 21780 22432 22535 22854 22550 22930 22780 23104 22561 22260 22528 22195 22545 22314 22491 22234 22328 4235 7021 7965 9772 10410 12430 12390 43630 38248 35143 31696 30247 27672 27112 25949 26416 25291 25253 23752 24257 23950 24386 23258 23742 22677 23849 23458 24055 22683 23104 22556 23612 22604 23209 22140 23012 22940 23655 22699 22941 22007 23309 22544 23110 21888 22785 21964 23208 22747 23267 22446 22540 21957 23061 22475 22680 22016 22457 22358 23289 22627 22426 21862 22573 22423 22763 22083 22479 21787 22999 22855 23169 22110 22005 22197 23185 22257 22178 21344 21743 22315 23889 23205 22056 21061 22715 22805 22252 21792 21585 22597 23808 22982 21611 21333 23084 22359 22177 21533 21872 22919 23599 22222 21334 21818 22859 22380 22062 22276 21959 22976 22762 22631 21858 22259 22536 22377 22265 21942 22464 23052 22620 22445 21831 22661 22345 22407 22036 22080 22419 22997 22291 22298 21834 22711 22310 22517 21932 22261 22303 23027 22317 22347 21806 22819 22176 22565 21616 22509 22496 23204 22030 22385 21990 22867 21941 22211 21664 22668 22497 22665 21525 22379 22151 22941 21883 22455 21760 23104 22459 22536 21714 22827 22077 22404 21831 22101 22122 23210 22021 22326 21929 22874 21767 22602 21523 22923 22501 22499 119 5147 8134 11048 11675 14013 14732 15629 15055 43600 38375 33550 29836 28064 26962 26389 25625 25088 23646 23950 23852 23921 22760 22362 23330 24659 23664 22988 21745 22817 23119 23000 22306 21952 22229 23792 23744 22676 21193 22736 23013 22544 21953 21692 21909 23758 23643 22108 21228 22583 22824 22183 22406 22014 23040 22743 22797 22049 22304 22721 22588 22361 22327 22080 22985 22757 22560 21856 22820 22304 22472 21953 22712 22671 23155 21991 22347 22312 22894 22100 22514 21817 22897 22557 22520 21679 22513 22288 22577 22067 22343 22417 23200 21801 22355 22327 22776 22357 22320 22125 23172 22345 22437 21817 22995 22129 22663 21795 22415 22417 23159 21963 22311 22128 22901 22187 22576 21627 22454 22342 23282 21859 22383 21908 22905 21884 22342 21651 22370 22460 23024 21924 22179 22185 22716 21870 22551 21650 22823 22595 22912 21809 22272 22287 22855 22106 22189 21056 21971 22896 23738 22444 21531 21161 22878 22620 22375 21825 21760 21509 23315 23296 22700 21122 21873 22646 22740 21704 21792 21331 22990 23543 22939 22394 21791 22503 22379 22482 22028 22081 22282 22929 22492 22130 22016 22367 22371 22374 22167 22029 22187 1179 7753 11533 13652 15831 16016 17152 16759 18528 18647 37961 31655 29232 27258 26428 24528 24509 23744 24714 23629 23574 22536 23767 22833 23415 22658 22802 22602 23530 22684 22784 22003 23143 22444 22894 21968 22891 22736 23411 22041 22599 22023 23116 22223 23063 21697 22875 22561 23188 21831 22380 22183 23096 22201 22572 21828 22464 22457 23056 22349 22273 21985 22819 22213 22562 22076 22279 22272 23195 22497 22514 21755 22691 22298 22515 21960 21680 21760 23255 23381 22599 20905 22074 22826 22492 21582 21553 22167 23843 22981 22792 21171 21819 22731 22723 21813 21587 21721 23645 23126 21782 21326 22835 22738 22143 22144 22062 22881 22541 22489 21730 21973 22493 22400 22163 22231 21874 22463 22565 22950 22383 22147 21804 22644 22263 22407 22084 22149 22234 22967 22281 22229 21671 22741 22112 22528 22199 22166 21943 23072 22541 22704 21556 22529 22180 22940 21880 22435 22115 22276 21851 23039 22485 22837 21717 22329 21932 22832 21984 22627 21862 22284 22096 23162 22378 22581 21491 22368 22253 22848 21820 22481 21683 22915 22460 23010 21667 22408 22088 22784 21888 22520 21928 22244 21765 22906 22604 22908 21965 22131 21728 22659 10389 14514 15713 17265 17463 18958 19102 20433 19959 34570 29150 27063 26007 25542 24071 23606 22601 22433 23202 24521 23604 22432 21575 22457 23034 23233 22321 22164 21468 22350 23288 23874 23717 23212 21496 21456 22233 23122 22584 22222 22462 21797 22665 22681 22909 22416 22124 22045 22381 22565 22577 22230 22315 21857 22253 22547 23104 22310 22162 21760 22121 22225 22698 22020 22400 21959 22248 22103 22904 22484 22828 21753 22274 22038 22846 22166 22729 21881 22644 21692 22612 22249 23144 22258 22645 21450 22336 22020 22779 22199 22583 21801 22586 21475 22586 22264 23177 22211 22651 21576 22450 22224 22725 21831 22454 21662 22200 21933 23115 22346 22793 21514 22365 22009 22841 21909 22633 21875 22202 21992 22900 22588 22856 21857 22197 22044 22811 22230 22534 21789 22073 21991 22968 22624 22653 21879 22277 21936 22769 22106 22306 21843 21408 21591 23370 23477 23031 21576 21277 21544 23062 22520 22408 21798 21544 21511 22985 23440 23410 22208 21315 21353 22881 22381 22506 21820 22117 21125 21753 22851 23841 23005 21824 22011 22193 22725 22151 22405 21935 21984 22415 22887 22656 22218 21939 22141 22254 22481 22129 22390 22037 15029 17261 19339 20024 20862 20216 20450 20472 21557 20976 27173 24992 23992 23108 23745 23365 23367 22177 22736 22481 23090 22158 22647 21853 22707 22544 23196 21905 22371 22185 22936 22025 22763 21633 22689 22483 23029 21788 22331 22024 22924 22010 22705 21701 22375 22094 23232 22404 22599 21640 22676 22217 22441 21692 22204 22103 23146 22261 22409 21717 22736 22065 22628 21880 22247 22071 23211 22272 22284 21767 22760 22195 22451 21872 22112 22408 23112 22509 22458 21612 22477 22333 22542 22088 21989 21687 23088 22946 22215 21226 22417 22743 22317 21574 21660 21222 22660 23507 23346 21798 21323 22091 22894 21920 21934 21065 22353 23383 23532 21686 21312 21238 22861 22375 22044 21615 21448 22467 23676 22773 21678 22212 22201 22710 22216 22274 21792 22050 22473 22866 22371 22085 21958 22551 22216 22301 21968 22103 22365 23020 22129 22067 22104 22576 21910 22608 21625 22491 22457 22917 21868 22233 22066 22777 22007 22396 21825 22332 22223 23070 22008 22258 21798 22913 21969 22482 21561 22487 22203 23061 22144 22229 21824 22855 21975 22406 21576 22663 22312 22943 21581 22273 22057 22804 21940 22329 21988 23085 22148 22245 21708 22896 21819 22792 21522 22834 22385 22843 21710 22263 22160 22666 21879 22286 22003 23057 22347 22252 21739 22868 22146 22448 21681 22494 22243 23061 22208 22145 21898 22906 21976 22109 21495 22400 22849 23296 21865 21592 21568 22998 22269 22152 21073 21948 23161 23751 22311 21372 21408 22865 22313 22196 21239 21653 22821 23680 22752 21543 20994 22250 22692 22251 21837 21302 22401 23424 22821 22037 22049 22111 22695 22408 22317 22079 21962 22287 22710 22352 22103 21888 22568 22349 22208 21820 22039 22189 22863 22567 22592 21625 22267 22120 22531 22000 22174 21757 22766 22448 22632 21702 22344 22305 22540 21888 22261 21714 22865 22421 23003 21907 22320 21739 22921 21934 22504 21833 22349 22205 23040 22122 22375 21473 22542 22177 22656 21971 22294 21739 23138 22389 22460 21543 22593 22105 22637 21630 22165 21558 23031 22489 22730 21547 22394 22055 22877 21817 22432 21605 22867 22445 22992 21675 22189 22080 22727 21875 22244 21636 22912 22413 22584 21630 22528 22241 22545 22342 22087 21941 23042 22576 22425 21480 22675 22400 22631 21780 21312 22252 23387 23323 22612 20912 22087 22756 22168 21561 21456 22089 23560 23164 21927 20983 22228 22690 22302 21666 21883 20994 22151 23174 23585 22175 21152 21698 22618 22403 22003 22020 21884 22776 22672 22571 21981 21927 22407 22535 22120 22305 21765 22568 138 101 3694 7396 9379 10882 11331 12381 12844 14405 43656 38297 33337 31104 29045 28107 26266 25992 24824 25517 24787 24876 23389 23841 23395 23959 22879 189 5161 10663 12513 14574 14545 16230 16568 17350 43695 39161 32496 30824 28584 27686 25336 25405 24711 25172 23879 23974 22961 23820 23668 24167 22958 23056 6931 12245 13957 16879 16279 18462 18611 19429 18511 38752 33032 30260 27374 26441 25019 25514 24658 24765 23365 23862 23556 23776 23273 23189 22811 23816 10001 13316 15355 17820 18487 19364 18809 19635 20761 21608 31705 28008 26257 26437 24583 24162 22667 24165 24765 23728 21858 23197 23446 22733 21865 22760 24023 17125 17543 18619 20435 20825 20806 20247 21078 22741 22227 26482 25207 24461 24136 23424 23194 23031 23555 23528 23333 22589 22623 22717 23171 22515 22727 22119 23042 22975 23397 22644 22422 22333 23191 22377 22628 21900 23098 22745 22891 21959 22589 22474 22736 22622 22293 22070 23097 22716 22816 21861 22794 22441 22666 22205 22389 22291 23288 22562 22553 21776 22936 22171 22731 21646 22705 22423 23182 22012 22446 22156 22920 22111 22544 21722 23113 22649 23067 21646 22480 21952 22980 22081 22556 21632 22941 22613 23008 21884 22264 22357 22768 22009 22404 21763 22772 22663 23114 22121 22225 21968 22891 22075 22158 21486 21888 23029 23764 21987 21575 21303 23022 22373 22149 21504 21773 22867 23834 22425 21408 21731 22983 22528 21831 21184 22265 23488 23193 21261 21944 22695 22245 22162 21835 22461 22556 22832 22057 22132 22433 22369 21937 21937 22156 22983 22451 22247 21941 22775 22087 22379 21911 22126 22564 23129 22136 22173 22272 22745 21926 22214 22226 23047 22301 22247 22087 22860 21946 22435 21793 23111 22336 22481 21787 22874 21912 22482 22064 23144 22379 22465 21710 22834 21868 22371 22016 23296 22176 22345 22084 22709 21901 22508 22592 22754 21721 22841 22028 22537 21517 23049 22222 22289 22146 22488 21740 22325 22509 22996 21765 22503 22279 22427 21592 22979 22357 22188 22019 22680 21888 22272 22396 23108 21836 22295 22407 22352 21661 22055 23202 22369 21354 23149 21871 21920 21463 23601 22572 21300 22565 22272 21254 22188 23508 22512 20851 22626 22415 22087 21399 23155 23515 22060 21202 22807 22338 22020 22378 22727 22602 21763 22727 22178 22278 22164 22939 22204 21934 22394 22329 21921 22366 22599 22421 21798 22816 22120 22052 22344 22997 22026 22236 22204 22328 21645 22985 22307 22183 22183 22424 21657 22609 22599 22490 21696 22821 21913 22371 22009 23072 21706 22416 22263 22583 21829 23158 22021 22391 22155 22669 21867 22673 22397 22590 21596 22793 21879 22209 22193 23133 21791 22343 22090 22393 21519 22700 22361 22597 21637 22896 21885 22342 21777 23024 22243 22032 22309 22569 22359 22087 22460 22850 21604 22626 22120 22445 21545 23004 22199 22174 21928 22758 22027 21737 21979 23664 22180 21456 22612 22138 21316 22259 23439 23075 20954 22419 22240 22020 21155 23080 23271 21685 21571 22916 21847 21629 21996 23754 22627 21329 21558 22960 22236 21856 22321 22629 22626 21696 22339 22293 22787 21769 22323 22675 22528 21824 22360 22247 22221 109 3239 7104 9404 10375 12539 12890 13565 13690 43629 40567 35318 31027 29904 27656 3728 8675 13350 15032 16160 16261 18178 17797 18700 43607 39393 34049 31680 28385 27495 7243 12423 14614 17009 18048 19656 19093 19697 19765 20850 36304 31904 28928 28480 26280 12691 14889 17864 18328 19592 19730 21504 20489 20867 20887 33780 29031 27259 26121 26184 24567 18784 20192 21050 20793 21412 21805 22421 21368 21813 28375 26864 24901 24519 24448 24673 23283 23548 23542 23606 22284 22661 22791 24489 23258 22075 22784 23627 22753 22208 22551 24405 22784 21766 22770 22930 22325 22024 22631 24116 22447 21746 22965 22889 22098 21620 23053 24032 21960 22023 22917 22331 22564 22121 23111 22933 22357 22316 22845 22437 22473 22162 23096 22658 22341 22341 22875 22176 22336 22481 23094 22700 22297 22172 22888 22151 22423 22248 23255 22344 22486 22186 22929 21986 22363 22268 23207 22534 22552 21868 23036 22016 22810 21727 23153 22602 22583 21749 22894 22237 22684 21687 22912 22444 22855 21632 22869 22096 22224 21765 22982 22558 22639 21526 22791 22048 23109 21571 23072 22409 22520 21790 22902 21933 22481 
