# Supplementary material for: An Active Feature Selection Strategy for DWT in Artificial Taste
Source: Hindawi journal article supplement (doi:10.1155/2018/9709505), 2018-01-01
Supplement: f1 [file 9709505.f1.zip › redWine-hi-1.txt]

43462 43468 43450 43884 53 2094 15776 19211 21721 21900 23118 22371 23856 23076 23854 23310 24009 23325 24209 23467 23992 23328 24156 23584 24153 23666 24308 23780 24487 23793 24385 23753 24280 23713 24384 24011 24428 23927 24516 24166 24537 23813 24400 24133 24519 23759 24634 23925 24653 24037 24724 23938 24535 23825 24538 24001 24544 24084 24602 24164 24682 24205 24518 23968 24656 24100 24586 24158 24524 24160 24614 24193 24634 24100 24561 24200 24588 24065 24582 24156 24596 24272 24649 24208 24520 24225 24543 24089 24599 24210 24557 24240 24701 24174 24553 24076 24688 24160 24476 24256 24576 24278 24679 24344 24746 24301 24469 24135 24312 24152 24514 24236 24499 24410 24565 24532 24589 24544 24453 24264 24320 24192 24320 24231 24369 24278 24544 24440 24675 24657 24649 24449 24406 24138 24471 24342 24359 24298 24289 24364 24464 24430 24723 24628 24756 24593 24440 24312 24306 24090 24327 24167 24314 24271 24362 24370 24550 24560 24528 24477 24331 24496 24130 24460 24049 24546 24133 24710 24315 24784 24387 24800 24399 24618 24418 24649 24275 24652 24196 24422 24148 24346 24115 24577 55 16843 19799 22006 21967 23019 22649 23068 22666 23162 31574 27357 25625 25443 24844 24998 24555 24662 24421 24687 24173 24725 24413 24743 24457 24997 24322 25017 24347 24896 24360 24901 24329 24864 24179 24746 24215 24603 24176 24556 24040 24773 24195 24668 24219 24911 24234 24899 24267 24864 24288 24861 24246 24794 24128 24776 23960 24609 23948 24576 24084 24032 24201 24726 24198 24851 24265 24845 24311 24872 24234 24802 24252 24745 24149 24695 24017 24641 24004 24618 23944 24586 23992 24677 23944 24640 24036 24711 24020 24715 24091 24785 24170 24743 24205 24682 24103 24582 24084 24449 24061 24568 23991 24522 24064 24503 24122 24628 24058 24715 23961 24768 24052 24761 24183 24657 24042 24457 24112 24555 24053 24677 24020 24704 24214 24633 24166 24377 24087 24496 24155 24568 24314 24466 24092 24464 24201 24521 24325 24593 24089 24420 24145 24472 24214 24616 24170 24413 24057 24549 24283 24636 24004 24564 24148 24465 24330 24352 24204 24416 24392 24486 24183 24407 24262 24581 24114 24400 24353 24582 24097 24436 24557 24388 24167 24340 24584 24228 24132 24578 24232 24371 24224 24486 24329 24470 24548 24193 24339 24674 24036 24357 20373 21973 22697 23303 23116 23252 23271 23220 23320 35918 26276 25250 25266 24789 24754 24561 24691 24558 24711 24448 24810 24256 24805 24092 24888 24212 24663 24407 24452 24418 24536 24490 24563 24330 24647 24309 24737 24128 24739 24278 24596 24343 24506 24280 24685 24241 24684 24183 24760 24030 24628 24354 24810 24208 24476 24226 24711 23871 24881 24161 24640 24193 24589 24148 24698 24064 24768 24088 25006 24235 24529 24064 24768 24038 24742 24165 24476 24165 24770 23898 24823 24207 24760 24124 24752 24001 24820 23995 24503 24240 24597 23919 24809 24078 24576 24291 24629 23951 24796 24039 24663 24311 24664 23861 24854 24064 24473 23922 24792 23868 24614 24009 24656 24181 24606 24085 24416 24088 24641 24009 24553 24094 24512 24025 24612 23978 24570 23927 24592 24036 24629 23924 24551 24108 24449 23937 24561 24055 24689 23918 24663 24052 24804 24072 24601 24032 24356 24128 24614 23961 24403 24178 24560 24030 24480 24146 24531 24064 24331 24167 24521 24128 24392 24133 24509 24153 24568 24135 24501 24166 24592 24042 24556 24129 24296 24137 24375 24263 24252 24072 24445 24247 24352 23882 24439 24268 24478 24119 24362 24253 24400 19239 22663 22966 23171 23448 23723 23282 23118 23432 23875 26551 25043 24832 24679 24675 24818 24421 24396 24259 24427 24730 24437 24247 24341 24308 24708 24427 24256 24188 24361 24519 24569 24199 24179 24357 24449 24599 24265 24316 24177 24570 24308 24368 24059 24500 24292 24679 24102 24428 24092 24681 24353 24529 23936 24485 24336 24672 24149 24250 24234 24599 24288 24486 24102 24584 24196 24604 24303 24546 24007 24469 24333 24802 24265 24385 23937 24576 24240 24690 24099 24325 23913 24569 24302 24686 24113 24335 24023 24635 24251 24744 23905 24353 24097 24717 24098 24663 24055 24481 24002 24632 24261 24744 24091 24598 23891 24590 24153 24730 24113 24620 23836 24743 23969 24768 24103 24733 23952 24544 23789 24684 24089 24729 24077 24504 23865 24361 24048 24693 24197 24658 23927 24400 24014 24710 24121 24680 24023 24517 23704 24617 24028 24732 23959 24765 23956 24705 23860 24300 23952 24582 23920 24562 24109 24584 23824 24604 23993 24407 24007 24544 24010 24393 23895 24643 23885 24433 23875 24634 23994 24624 23928 24501 23906 24544 23976 24547 24103 24615 23844 24480 24108 24305 24023 24408 24007 24556 24065 24356 24008 24330 24096 22939 23099 23817 23492 23872 23440 23861 23561 23888 27017 25145 24512 24797 24161 24493 24149 24480 24132 24588 24188 24625 24112 24308 24298 24348 24196 24429 24233 24663 24185 24472 24012 24340 24144 24383 24199 24432 24397 24472 24090 24327 24125 24390 24248 24613 24374 24343 24105 24212 24032 24372 24422 24550 24411 24252 24151 24128 24144 24406 24404 24576 24341 24109 24099 24131 24133 24439 24385 24658 24214 24156 24270 24183 24154 24481 24448 24405 24118 24073 24045 24137 24261 24381 24125 24081 24236 23896 24469 24245 24620 24210 24448 23873 24432 24078 24597 24270 24400 24095 24201 24080 24524 24368 24560 24236 24328 23969 24225 24100 24535 24328 24600 24129 24327 23835 24647 24224 24587 24048 24320 24077 24705 24160 24456 23913 24440 24262 24519 24013 24381 23990 24654 24071 24373 24345 24631 24075 24449 23959 24613 24142 24363 24116 24775 24021 24392 24087 24679 23980 24681 24151 24633 23803 24640 24024 24395 24071 24580 23813 24779 23924 24623 24078 24384 24052 24556 23892 24683 23694 24685 23767 24673 23958 24620 24039 24583 24074 24485 24046 24471 24045 24916 24087 23951 24068 24470 24048 24504 24015 24593 23949 23428 23392 24347 23342 24413 23329 24463 23540 24357 23545 24930 23995 24556 24069 24532 24104 24581 23819 24491 23900 24666 23977 24576 23965 24285 24066 24384 24049 24407 24009 24440 23875 24576 23974 24641 23756 24576 23872 24389 23847 24456 23964 24471 23828 24461 23853 24640 23926 24482 23907 24312 24096 24192 24152 24354 24136 24433 23954 24525 23993 24549 24068 24370 24040 24470 24112 24424 24072 24327 23997 24320 23936 24320 23890 24524 24009 24457 23940 24460 24045 24370 24082 24391 24039 24305 24064 24279 24100 24240 24137 24348 24183 24160 24128 24211 24217 24206 24093 24206 24242 24266 24149 24192 24153 24092 24231 24058 24172 24073 24223 24183 24178 24341 23958 24505 23945 24446 23975 24561 23911 24529 23953 24268 24064 24160 24297 24089 24397 24138 24311 24087 24116 24196 24102 24475 23987 24523 24241 24368 23968 24279 24258 24064 24489 24044 24301 24042 24161 24460 23984 24324 24200 24270 24357 24028 24564 23857 24541 24059 24761 24180 24292 24151 24477 24452 24490 23946 24505 24229 24178 24272 24353 24054 24448 24038 24456 24140 24448 24172 24173 24155 24568 23851 24544 24096 24560 24135 24378 23921 24675 23878 24613 24132 24258 24140 24408 23780 24660 24041 24378 24100 24456 23908 24584 23842 24478 24124 24375 24033 24600 23853 24533 24023 24327 24064 24634 23800 24600 24101 24326 23991 24564 23713 24628 23991 24350 23882 24679 23905 24485 24076 24567 23694 24734 23950 24399 23949 24629 23882 24486 24118 24560 23751 24600 24089 24401 23942 24657 24000 24288 23868 24642 23879 24421 24015 24559 23804 24472 23987 24581 23758 24391 23854 24582 23696 24422 23848 24534 23687 24419 23891 24431 23847 24460 24000 24464 23570 24418 24176 24404 23720 24493 23907 24460 23707 24385 23868 24448 23725 24399 23930 24488 23776 24461 23864 24576 23815 24437 23924 24440 23841 24269 23927 24483 24006 24342 23965 24357 24119 24337 23861 24285 24094 24361 23943 24345 24041 24348 23809 24360 24065 24386 23941 24327 23964 24433 24028 24390 23904 24440 24087 24185 23986 24298 24066 24336 23872 24215 24072 24373 23940 24149 23972 24281 24180 24160 24170 24188 24171 24452 23906 24311 24170 24399 24348 24108 24019 24304 24276 24231 23880 24216 24128 24503 24064 24244 24032 24425 24354 24038 23904 24184 24448 24260 23816 24184 24152 24481 24130 23990 23907 24290 24434 24247 23988 24096 24129 24434 24320 24113 23933 24265 24320 24145 23881 24008 24123 24448 24225 23938 24056 24228 24253 23909 24294 23982 24552 24156 24401 23770 15594 20261 21847 21874 22421 21964 22009 22440 22759 43444 28952 25577 25242 24912 24929 24512 24744 24545 24791 24471 24521 24169 24641 24369 24790 24203 24505 19777 22698 22706 23143 22647 23232 23174 23558 22952 37385 26198 25505 24745 24860 24443 24888 24421 24721 24088 24656 24280 24771 24191 24610 24110 24832 55 22522 22560 23425 23221 23800 23196 23668 23073 23897 28375 25530 24448 24953 24436 24938 24103 24871 24283 24833 24075 24618 24177 24784 24064 24595 24168 19990 22769 23640 23328 24089 23274 24028 23470 24202 23296 26086 24645 24858 24043 24936 24277 24534 24124 24780 24028 24407 24228 24740 23968 24596 24159 24656 22394 24166 23744 24215 23301 24331 23688 24707 23581 24407 24724 24693 24082 24561 24081 24512 23989 24518 24023 24665 23904 24576 23914 24551 23840 24581 24021 24517 23936 24426 23745 24586 24080 24544 23929 24644 23737 24468 23836 24695 23865 24540 23817 24580 23921 24557 23885 24289 23970 24554 24048 24368 24041 24407 23992 24402 23925 24469 23868 24503 23950 24336 23926 24367 24006 24308 24054 24357 23889 24357 23863 24453 23890 24464 23984 24365 23985 24248 24034 24263 24149 24356 24005 24328 23770 24391 24064 24348 23933 24517 23976 24364 24067 24265 24103 24240 24121 24064 24178 24088 24092 24108 24261 24277 24260 24591 24228 24522 24365 24193 24212 24393 24394 24048 24423 24017 24211 24087 24171 24081 24128 24093 24138 24225 24035 24328 24040 24352 23984 24493 23880 24473 23947 24269 23981 24279 24105 24135 24297 24143 24405 23983 24356 23986 24292 23760 24489 24072 24427 24038 24513 24027 24214 24112 24353 24016 24404 24023 24375 23897 24489 23957 24436 24166 24281 24214 24151 24153 24306 24015 24463 23805 24472 23936 24412 24056 24396 24035 24245 24091 24496 23924 24593 23727 24567 24021 24320 24173 24251 24090 24330 23976 24541 23942 24555 23744 24541 24016 24448 24048 24460 23975 24534 23912 24546 23920 24480 24079 24242 24004 24375 23896 24604 23643 24681 23868 24259 24005 24404 23958 24633 23633 24691 23766 24536 23981 24315 23968 24567 23896 24566 23887 24452 23993 24323 24016 24309 24009 24496 23776 24669 23817 24441 24033 24368 23881 24551 23708 24690 23769 24528 23873 24429 23706 24509 23672 24489 23953 24180 23895 24471 23787 24470 23764 24436 23888 24128 23977 24497 23820 24346 23876 24388 23738 24375 23829 24521 23676 24445 23926 24513 23794 24408 23827 24421 23851 24416 23888 24327 23751 24505 23668 24341 23991 24480 23909 24347 23844 24324 24027 24197 23960 24284 23896 24298 23895 24265 24075 24135 23901 24365 23942 24259 24080 24236 23931 24320 23793 24256 24009 24251 23984 24212 23921 24372 23734 24261 24083 24132 23991 24390 23895 24249 24132 24077 24064 24428 24088 24321 24122 24096 24087 24059 23932 24304 24017 24105 24204 24028 23867 24311 23860 24148 24282 24072 23945 24475 23956 24072 24352 23944 23953 24497 24009 24135 24244 24064 23992 24351 24072 24149 24359 23877 24056 24558 23924 24038 24384 23941 23996 24427 23924 24072 24393 23880 24441 24017 24097 24093 24384 23888 24500 23949 24174 24039 24473 23760 24375 59 19248 20828 22122 21907 22336 22368 22448 22359 22730 34327 26855 25096 24955 24321 24921 19974 22825 22701 23268 22798 23569 22918 23733 23139 38704 26060 25355 24576 24928 24561 20412 22490 23545 23073 23634 23466 23668 23258 23889 23193 26286 24832 24962 24320 24933 18253 23384 23385 23808 23411 24097 23337 24058 23493 24070 25610 25296 24270 24744 24320 24682 23292 24370 23549 24285 23737 24171 23659 24396 23484 26257 24337 24666 24201 24739 23951 24717 24096 24661 24208 24541 23393 24689 23985 24561 24005 24544 23952 24800 23883 24450 23877 24579 23817 24494 23936 24474 23950 24376 23918 24488 23816 24495 24020 24286 23933 24532 23809 24266 23863 24435 23840 24475 23960 24413 23813 24461 23812 24461 23788 24422 23848 24285 23885 24480 23808 24421 23991 24337 23904 24435 23719 24364 23996 23708 23881 24404 23852 24409 23857 24432 23948 24375 24010 24262 23945 24269 23968 24248 23972 24173 24004 24328 23882 24313 23239 24472 24012 24361 24075 24591 23991 24229 23901 24326 23956 24128 24103 24158 24201 24226 23932 24443 23961 24317 24079 24142 24033 24024 24228 23979 24442 24036 24326 
20715 21395 20800 21424 20933 21180 20924 21477 20579 21564 20788 21411 20793 21458 20688 21541 20705 21577 20697 21347 20612 21388 20695 21299 20632 21505 20667 21271 20758 21169 20896 21305 20473 21591 20587 21312 20564 17521 17196 17664 17286 17776 17385 17719 17531 17597 17851 18305 18080 18432 18112 18371 18040 18386 18094 19053 18420 18731 18624 18846 18653 18881 18515 18926 18465 18985 18307 19040 18788 19441 18902 19264 18880 19288 18681 19210 18797 19659 18955 19603 19149 19577 19063 19555 19008 19443 18868 19511 19014 19706 19167 19952 19168 19714 19086 19780 18938 19652 19355 19784 19229 20002 19319 19987 19383 19975 19239 19984 19100 19755 19036 19528 19261 20128 19344 20168 19372 20201 19282 20089 19346 19897 19157 19898 19372 20101 19508 20219 19497 20229 19544 20230 19489 20137 19301 20007 19309 19978 19456 20213 19515 20447 19335 20412 19379 20293 19493 20272 19456 20215 19419 20145 19328 20176 19419 20152 19552 20153 19544 20293 19616 20295 19702 20294 19479 20188 19425 20011 19783 20161 19495 20226 19514 20248 19564 20299 19584 20379 19686 20329 19724 20302 19689 20176 22 0 175 0 0 55 595 3348 4629 6503 34673 25632 22389 21689 20848 20970 20251 20695 20048 20457 19904 20327 19744 20408 19940 20286 19884 20304 19822 20311 19931 20328 19865 20424 19912 20428 19905 20352 20016 20390 19797 20237 19815 20178 20009 20070 19991 20273 20023 20448 20064 20248 20124 20368 20221 20351 20307 20244 20039 20225 19887 20167 19836 20254 19864 20081 19943 20088 20056 20241 20090 20234 20217 20314 20391 20509 20401 20453 20239 20302 20038 20280 20064 20189 20224 20145 20014 20166 20173 20267 20217 20422 20320 20342 20283 20112 20497 20111 20499 20020 20333 19845 20584 20317 20569 20065 20553 20278 20625 20374 20597 20376 20648 20284 20586 20231 20504 20194 20337 20029 20516 20102 20699 20240 20823 20232 20679 19954 20695 20081 20873 20248 20679 20203 20584 20033 20727 20335 20869 20225 20605 19954 20496 20154 20845 20182 20733 20064 20717 20106 20913 20247 20779 19895 20784 20281 20919 20087 20589 20176 20898 20141 20727 19969 20978 20059 20765 20087 20961 20076 20721 20155 20882 20169 20762 20210 20942 20033 20807 20317 20809 19968 20903 20292 20685 20215 20913 19915 20988 20253 20705 60 833 7613 11923 12526 13961 13872 15085 14512 15680 43067 25237 22086 21576 20736 21120 20528 21000 20304 21053 20043 21055 20145 20835 20160 20781 20096 20949 20149 20697 20131 20855 20081 20957 19947 20786 20266 20730 20264 20771 20234 20720 20275 20708 20267 20736 20184 20794 20112 20679 20329 20631 20262 20637 20217 20778 20251 20696 20201 20562 20364 20600 20229 20880 20153 20794 20101 20624 20350 20435 20410 20727 20211 20682 20368 19992 20413 20661 20295 20696 20388 20580 20619 20426 20416 20864 20243 20708 20645 20480 20305 20961 20336 20618 20713 20412 20389 20849 20289 20628 20658 20547 20407 20893 20265 20508 20646 20504 20432 20591 20699 20625 20551 20896 20421 20535 20733 20626 20519 20560 20535 20457 20879 20506 20744 20301 21091 20298 20774 20591 20918 20384 20760 20681 20887 20354 20775 20552 20912 20273 20866 20615 20843 20224 20892 20603 20744 20362 20967 20425 20794 20249 21048 20497 20903 20288 20978 20549 20836 20407 20963 20519 20992 20171 20995 20458 21017 20210 20937 20421 21067 20243 20974 20450 21136 20283 20996 20487 21061 20336 20941 20394 21111 20383 20862 20343 21147 20369 21063 20135 21025 20467 7660 14151 16236 16279 17720 17137 18057 17291 18315 17911 24989 21625 21401 20857 21448 20672 21097 20392 21187 20580 21273 20450 21079 20349 21239 20519 21172 20336 21104 20280 21045 20309 21026 20348 20984 20345 20998 20360 21020 20492 21033 20311 20992 20513 20775 20357 21041 20288 21079 20114 21027 20321 21190 20256 20939 20167 20982 20350 21080 20118 20880 20303 21021 20484 20902 20281 20905 20578 21067 20413 20807 20368 20921 20336 20992 20449 20903 20384 20992 20532 20909 20429 20859 20408 20977 20488 20940 20338 20875 20445 20889 20591 20986 20347 20845 20441 20903 20505 21060 20279 20956 20487 20930 20657 21002 20576 20744 20467 20918 20570 21118 20597 20648 20344 20773 20628 20842 20803 20913 20488 20923 20728 20819 20756 21165 20673 20696 20466 20676 20696 21009 20943 20807 20504 20679 20620 20804 20921 20987 20760 20584 19968 20788 20600 20865 20981 21091 20699 20631 20631 20673 20670 20832 20888 21072 20831 20391 20913 20634 21143 20705 21101 20599 20973 20359 21088 20642 21091 20762 21098 20792 20945 20581 20853 20756 21046 20866 21022 20653 20972 20503 20784 20413 21083 20689 21317 20701 21019 20562 20884 20428 57 17203 18817 18545 19323 18978 19370 18898 19563 19085 25708 21532 21623 20890 21258 20400 21029 20533 21263 20684 21336 20736 21312 20541 21013 20407 21159 20544 21303 20683 21272 20608 21185 20436 21180 20468 21313 20563 21344 20544 21173 20251 21059 20433 21321 20594 21325 20530 21127 20240 21139 20534 21351 20582 21207 20498 20997 20394 21138 20715 21307 20630 21328 20429 21105 20389 21301 20533 21378 20370 21278 20380 21161 20231 21095 20338 21140 20496 21031 20439 20961 20298 21057 20437 21139 20539 21120 20539 21225 20388 21177 20512 21213 20531 21150 20237 21148 20349 21049 20430 21184 20229 21415 20387 21063 20379 21207 20487 21082 20464 20969 20482 21085 20727 21216 20457 21105 20622 21079 20627 20996 20323 20982 20513 21134 20631 21025 20526 20929 20633 20988 20587 21035 20572 21112 20433 21020 20577 21177 20425 20996 20684 21199 20486 20930 20643 21091 20956 21032 20714 20880 20677 21127 20488 20909 20866 20871 20563 21085 20523 20944 20929 20704 20750 20880 20697 21026 20848 21139 20593 20905 20805 20891 20890 20901 20924 20780 20928 21043 20902 20787 21000 20678 20951 20852 20960 20832 20948 20684 21175 20793 21114 18599 20140 20171 20029 20225 19898 20470 20080 20576 32297 21568 20984 20711 20982 21038 21193 20846 20836 21045 20776 20912 21232 20809 21248 20584 21372 20422 21256 20485 21226 20615 21122 20770 21043 20871 21159 20753 21236 20636 21218 20824 21084 20836 20905 20853 20874 20784 21052 20700 21184 20597 21242 20418 21170 20738 21104 20809 21016 20793 21178 20822 21344 20426 21376 20474 21304 20723 21168 20829 21026 20787 20981 20755 20971 20736 21221 20707 21158 20583 21322 20595 21330 20498 21365 20533 21399 20456 21273 20398 21422 20434 21350 20386 21401 20404 21392 20416 21495 20392 21447 20365 21480 20372 21453 20465 21490 20448 21431 20480 21393 20444 21377 20608 21288 20727 21339 20695 21466 20664 21136 20709 21083 20695 21124 20677 21272 20622 21387 20404 21497 20459 21538 20513 21487 20566 21395 20503 21277 20472 21282 20461 21357 20224 21412 20485 21275 20615 21221 20644 21341 20616 21304 20565 21375 20712 21303 20590 21255 20567 21198 20480 21326 20385 21344 20339 21152 20531 21161 20530 21210 20521 21296 20317 21190 20530 21123 20586 21136 20666 21206 20537 21226 20563 21028 20705 21173 20551 21233 20567 21075 20678 21073 20731 21053 20634 21081 20615 21086 20759 20983 20745 21188 20653 21155 20781 21036 20647 21143 20646 21178 20633 21035 20720 21177 20666 21131 20716 20912 20895 20977 20707 21117 20812 20993 20879 21113 20728 21029 20996 20856 20704 21292 20616 20935 21000 20999 20712 21019 21026 20995 20729 21242 20848 20874 20922 21201 20662 20937 21030 21074 20832 21036 21172 20839 20763 21071 21019 20816 20745 21223 20933 21023 20860 21236 20843 20871 20857 21198 20801 20839 20865 21167 20877 20866 21053 20668 21124 20784 21264 20736 21067 20740 21296 20807 21096 20771 21229 20855 21045 20899 21299 20806 20957 20765 21320 20963 20951 20608 21265 20925 21079 20819 21392 20855 21103 20605 21335 20945 21281 20566 21228 20760 21360 20686 21097 20785 21344 20800 20887 20757 21305 20752 21163 20545 21340 20873 21354 20519 21303 20784 21321 20557 21293 20744 21498 20640 21232 20594 21335 20808 21413 20463 21349 20728 21414 20642 21208 20636 21511 20738 21362 20362 21329 20749 21425 20567 21149 20631 21511 20667 21290 20605 21492 20675 21304 20451 21314 20819 21399 20470 21133 20696 21358 20698 21248 20567 21429 20774 21356 20481 21343 20764 21384 20655 21238 20406 21456 20528 21396 20405 21309 20436 21265 20653 21138 20284 21184 20586 21281 20554 21210 20453 21239 20720 21157 20725 21224 20585 21276 20688 67 5075 10369 11558 13847 13395 14656 14327 15303 43340 31665 23128 22933 21371 21874 21056 21527 20914 21360 20663 21334 20575 21056 20708 21192 20775 73 7749 14951 15914 17152 16999 17639 17361 17956 17757 43345 24792 22725 21575 21797 20921 21383 20885 21342 20967 21291 20787 21264 20871 21214 20615 21127 61 16151 17428 18297 18173 18885 18745 19463 18749 19303 27832 22912 21472 21692 21109 21542 21112 21088 20768 21312 21184 21161 20853 21130 21125 21030 20769 13610 18543 19175 19250 19703 19761 19725 19525 19977 19911 23164 21458 21692 20925 21073 21113 21324 21056 21125 21345 20893 20815 21181 21116 20783 20839 21309 18627 20017 20104 20565 20109 20314 20555 20244 20336 32967 21421 21215 21268 20869 21228 20955 20969 21361 20840 21350 20888 21137 21415 20960 21040 20976 21028 21042 21047 20948 21121 20912 21193 20833 21098 20953 21089 20968 21228 20921 21136 20993 21052 20965 21252 20832 21317 20768 21323 20615 21335 20817 21208 20945 21152 20950 21012 20775 21486 20789 21266 20684 21405 20529 21414 20499 21211 20973 21145 20851 21158 20812 21233 20667 21408 20602 21456 20541 21435 20595 21456 20643 21337 20832 21212 20869 21084 20736 21392 20680 21366 20732 21352 20716 21404 20568 21462 20492 21577 20552 21472 20408 21511 20309 21540 20597 21469 20557 21536 20560 21450 20563 21440 20521 21454 20466 21486 20512 21417 20537 21539 20554 21481 20639 21382 20818 21373 20689 21233 20784 21373 20583 21182 20494 21389 20499 21385 20519 21334 20656 21312 20561 21320 20571 21343 20598 21204 20833 21152 20710 21096 20596 21334 20492 21437 20339 21351 20417 21342 20516 21277 20669 21275 20648 21069 20504 21235 20602 21477 20608 21289 20550 21191 20784 21098 20918 21174 20652 21213 20686 21236 20640 21157 20704 21188 20794 21269 20785 21105 20743 21304 20664 21204 20568 21156 20827 21114 20696 21079 20635 21239 20717 21149 20534 21256 20760 21128 20846 21078 20836 21363 20833 21256 20729 21034 21000 20858 20799 21149 20763 21177 20659 21136 20974 21051 20944 20966 20880 21336 20689 21107 21209 20940 21088 20876 20726 21208 20655 21144 20805 21029 21189 20752 20955 21268 20695 21145 20796 20977 21223 21081 20918 21197 20855 21152 20827 20907 21116 20912 20956 21219 21032 21051 20817 20984 21223 20672 21275 20913 21080 20973 21265 20903 21387 20752 21179 20967 21062 20947 21271 20663 21308 20913 21141 20967 21232 20855 21396 20700 21251 20883 21130 20864 21397 20551 21384 20919 21129 20932 21400 20498 21520 20764 21271 21005 21265 20816 21302 20801 21315 20787 21257 20832 21289 20544 21410 20855 21169 20770 21436 20628 21462 20739 21305 20788 21212 20783 21442 20538 21478 20790 21109 20840 21475 20432 21528 20758 21214 20775 21477 20658 21512 20667 21315 20748 21495 20737 21579 20607 21472 20738 21390 20727 21475 20586 21376 20845 21254 20742 21476 20672 21331 20866 21196 20677 21529 20515 21518 20726 21229 20665 21518 20576 21241 20589 21399 20571 21296 20615 21282 20640 21348 20631 21431 20663 21235 20576 21398 20648 21360 20617 21300 20472 21405 20556 21457 20577 21341 58 4795 10127 13882 14218 15382 15062 16340 15662 16695 43353 26372 22191 22153 21205 21587 10487 16546 17095 18210 17659 18471 18241 18659 18365 43349 24745 22551 21579 21861 21124 13258 17483 18869 18973 19343 19160 19906 19179 19927 43349 24084 21921 22002 21159 21644 12824 19335 19484 19997 19744 20234 19957 20054 19943 20313 23507 22001 21623 21584 21272 9989 19861 20607 20602 20522 20611 20777 20536 20715 20536 23315 21617 21401 21250 21575 20968 21206 21411 21078 21002 21546 20838 21111 21303 20933 21070 21448 20861 21167 21208 20519 20960 21383 20384 21192 21205 21005 21136 21239 20855 21140 21067 20963 21229 20815 21324 21010 21271 20911 21377 20842 21353 20936 21249 20760 21333 20921 21335 21009 21157 20958 21240 20918 21201 21055 21083 20935 21382 20655 21447 20935 21148 20985 21365 20678 21504 20820 20924 20854 21181 20933 21239 20884 21448 20936 21361 20837 21463 20789 21453 20807 21303 20947 21285 20866 21381 20865 21412 20717 21569 20671 21499 20916 21177 20857 21432 20583 21559 20710 21490 20777 21496 20800 21285 20819 21478 20603 21606 20481 21539 20550 21554 20670 21507 
21256 21900 21455 21952 21413 21551 21760 21425 21363 21817 21512 21509 21593 21865 21687 21550 21335 21913 21444 21490 21769 21494 21551 21640 21367 21893 21448 21287 21729 21504 21724 21601 21547 21667 21653 21491 21856 21433 21789 21415 21834 21536 21619 21722 21497 21690 21553 21584 21639 21513 21794 21472 21808 21411 21839 21289 21898 21399 21805 21478 21815 21547 21683 21620 21549 21632 21426 21655 21579 21477 21593 21548 22144 21572 20499 20785 20391 20678 20263 20669 20374 20689 20378 20716 20594 20807 20523 20727 20369 20618 20371 20736 20429 20690 20546 20871 20543 20737 20384 20525 20635 20736 20457 20705 20615 20705 20677 20768 20736 20811 20421 20646 20344 21021 20538 20688 20583 20737 20672 20848 20839 20978 20617 20724 20407 20551 20370 20590 20539 20704 20576 20760 20730 21005 20859 20983 20705 20682 20491 20580 20656 20609 20556 20648 20597 20711 20771 21007 20859 21127 20917 20791 20718 20731 20576 20796 20574 20837 21032 20853 20984 20757 21003 20792 21014 20677 20886 20608 20635 20615 21008 20705 20832 20800 20920 20910 21046 20874 21039 20999 20855 20951 20912 20817 30 34 30 2754 6231 8337 10137 10917 12225 43181 22880 21577 21461 21216 21304 21059 21193 21098 21068 21031 21105 20919 21076 20840 20973 20700 21136 20937 21156 20868 21270 20946 21332 21026 21347 21051 21261 21076 21211 21060 21307 20965 21168 20941 21109 20784 21054 20963 21312 20845 21248 20992 21367 21040 21412 21031 21393 21000 21377 21031 21315 20953 21216 20953 21112 20828 21120 20915 21228 20676 21280 20957 21312 21101 21385 21115 21415 21105 21450 21111 21346 21104 21401 20922 21361 20817 21248 20779 21290 20914 21265 20960 21323 21016 21261 21075 21277 21072 21474 21120 21393 21088 21353 20978 21255 21015 21125 20930 21436 20970 21335 20866 21437 20901 21387 20987 21345 21205 21365 21152 21249 20881 21349 20987 21347 21079 21344 21233 21381 20974 21331 21049 21281 21153 21440 21038 21317 21112 21326 21103 21468 21169 21312 20925 21380 21023 21402 21190 21430 21145 21280 21212 21494 21225 21216 21036 21390 21335 21330 20981 21222 21315 21474 21012 21255 21203 21495 20945 21187 21309 21425 21012 21257 21376 21363 21155 21261 21504 21104 21234 21465 21189 21140 21392 21346 21063 21312 21357 21195 21232 21459 490 12603 15133 16243 16845 17381 17401 17943 17795 18176 24606 21783 21672 21099 21552 21169 21649 21219 21393 21367 21180 21385 21296 21349 21525 21200 21515 21061 21552 21301 21435 21312 21691 21454 21079 21456 21344 21290 21575 21216 21449 21152 21575 21248 21457 21319 21293 21419 21472 21237 21452 21353 21543 21111 21559 21464 21351 21337 21491 21196 21576 21132 21575 21299 21367 21338 21442 21181 21655 21171 21504 21333 21365 21262 21585 20965 21641 21358 21495 21333 21608 21299 21647 21141 21541 21299 21464 21159 21729 21194 21445 21325 21428 21175 21661 21161 21444 21335 21552 21235 21570 21248 21437 21297 21601 21528 21720 21249 21506 21153 21648 21184 21429 21232 21640 21115 21576 21333 21367 21324 21646 21216 21440 21266 21555 21025 21525 21234 21496 21143 21521 21213 21486 21241 21417 21305 21542 21120 21521 21232 21644 21126 21550 21312 21635 21240 21613 21275 21335 21282 21596 21225 21463 21262 21547 21303 21553 21242 21557 21292 21400 21284 21612 21318 21600 21268 21552 21337 21607 21257 21476 21378 21422 21257 21552 21295 21401 21248 21473 21461 21468 21512 21461 21488 21633 21115 21475 21380 21562 21318 21364 21315 16803 18649 19188 19149 19408 19660 20055 19824 19761 29092 22161 21761 21618 21318 21413 21347 21783 21530 21456 21189 21427 21549 21639 21345 21235 21296 21530 21560 21563 21178 21329 21443 21741 21372 21235 21357 21369 21564 21724 21224 21376 21691 21465 21601 21218 21960 21387 21718 21472 21463 21287 21560 21587 21557 21287 21348 21408 21655 21550 21469 21146 21577 21624 21612 21391 21321 21331 21607 21417 21543 21289 21504 21327 21624 21453 21632 21232 20891 21429 21641 21490 21525 21354 21548 21499 21696 21421 21520 21277 21638 21457 21736 21484 21512 21163 21568 21437 21696 21377 21583 21227 21464 21289 21712 21440 21697 21312 21497 21298 21704 21478 21786 21300 21523 21301 21568 21376 21753 21408 21667 21097 21500 21367 21765 21469 21700 21313 21517 21205 21686 21459 21749 21367 21601 21124 21642 21396 21779 21369 21745 21237 21442 21130 21618 21133 21659 21296 21694 21376 21617 21178 21621 21318 21604 21341 21733 21425 21512 21312 21603 21278 21605 21346 21775 21312 21601 21185 21600 21184 21645 21271 21607 21303 21656 21133 21436 21264 21543 21341 21744 21410 21664 21383 21574 21285 21591 21252 21555 21443 21673 21353 17335 19945 20500 20341 20708 20512 20875 20704 20837 20541 22264 21373 21578 21369 21655 21548 21669 21284 21565 21211 21597 21401 21604 21549 21592 21283 21390 21637 21546 21368 21683 21464 21753 21521 21492 21330 21927 21392 21507 21356 21797 21523 21428 21284 21402 21409 21564 21510 21792 21451 21418 21304 21331 21373 21527 21656 21833 21373 21555 21245 21351 21369 21482 21803 21657 21368 21652 21239 21440 21434 21549 21719 21670 21347 21309 21283 21364 21512 21708 21675 21529 21393 21399 21623 21663 21668 21468 21651 21280 21600 21303 21717 21485 21761 21443 21462 21393 21513 21566 21664 21562 21543 21360 21479 21412 21660 21587 21728 21560 21481 21391 21570 21495 21693 21580 21496 21304 21628 21517 21692 21488 21507 21803 21733 21564 21766 21409 21505 21528 21824 21473 21575 21399 21735 21552 21569 21134 21810 21429 21594 21328 21639 21463 21570 21285 21725 21431 21447 21363 21705 21321 21620 21531 21701 21236 21787 21441 21475 21461 21640 21307 21746 21213 21815 21351 21702 21450 21527 21485 21615 21362 21742 21300 21753 21127 21783 21232 21781 21188 21783 21216 21803 21267 21763 21323 21765 21233 21760 21096 21808 21111 21783 20721 21484 21056 21390 20948 21295 20989 21479 21152 23618 21496 21681 21332 21701 21253 21765 21313 21815 21274 21591 21360 21504 21511 21657 21465 21475 21348 21654 21315 21740 21300 21777 21257 21684 21303 21624 21515 21697 21387 21703 21190 21708 21222 21761 21262 21580 21263 21527 21397 21532 21441 21563 21293 21560 21813 21696 21373 21596 21420 21435 21448 21555 21480 21617 21289 21651 21162 21736 21289 21685 21373 21668 21452 21618 21344 21536 21371 22064 21510 21561 21517 21577 21511 21522 21413 21615 21423 21531 21447 21636 21335 21558 21517 21596 21450 21528 21440 21577 21457 21515 21409 21601 21465 21584 21552 21504 21565 21504 21719 21433 21677 21440 21673 21584 21600 21451 21512 21341 21484 21485 21296 21735 21312 21777 21342 21696 21369 21611 21399 21479 21650 21349 21803 21422 21635 21389 21512 21461 21358 21785 21344 21681 21341 21543 21393 21443 21787 21275 21493 21435 21742 21330 21736 21638 21496 21482 21748 21869 21712 21312 21747 21511 21597 21584 21511 21557 21716 21241 21732 21528 21545 21526 21490 21687 21529 21466 21800 21342 21577 21604 21572 21533 21616 21475 21736 21346 21568 21522 21602 21568 21696 21245 21747 21491 21622 21603 21697 21422 21776 21294 21615 21488 21518 21408 21854 21352 21800 21488 21457 21554 21644 21155 21821 21504 21566 21560 21714 21168 21799 21459 21584 21491 21799 21181 21870 21488 21604 21468 21770 21277 21650 21508 21648 20657 21893 21388 21572 21461 21763 21315 21670 21540 21754 21208 21779 21490 21637 21328 21828 21477 21593 21448 21818 21399 21563 21464 21896 21302 21767 21341 21831 21306 21639 21322 21799 21287 21612 21367 21748 21280 21607 21365 21617 21527 21550 21399 21632 21508 21602 21476 21697 21423 21669 21420 21764 21452 21682 21444 21830 21431 21623 21433 21795 21272 21648 21285 21767 21209 21572 21369 21728 21438 21687 21431 21671 21429 21763 21464 21623 21404 21522 21451 21612 21451 21640 21255 21570 21413 21781 21297 21575 21381 21736 21324 21607 21431 21705 21428 21539 21268 21580 21452 21578 21453 21514 21389 21731 21280 21627 21411 21626 21509 21636 21372 21539 21649 21742 21281 21506 21447 21843 21512 21372 21464 21583 21624 21533 21301 21536 21617 21753 21248 21529 21458 21777 21481 21358 21273 21531 21850 21600 21319 21527 21603 21828 21364 21539 21490 21681 21748 21504 21333 21521 21584 21809 21264 21469 21367 21537 21671 21376 21280 21559 21687 21792 21333 21532 21413 21664 21778 21572 21379 21716 21613 21504 21487 21895 21666 21618 21681 10457 14368 15716 16876 17250 17648 17523 17743 17819 29709 22851 21685 21393 21620 21713 21682 21451 21352 21432 21629 21587 21623 21336 21591 21605 21634 3581 17084 18597 19271 19280 19680 19415 19473 19648 20003 24738 21735 21604 21850 21603 21637 21473 21723 21660 21776 21440 21444 21433 21799 21431 21603 21248 16596 19725 20285 20113 20320 20295 20696 20441 20649 20207 22679 21730 21869 21294 21691 21511 21784 21381 21801 21482 21785 21429 21550 21416 21833 21479 21524 19443 20904 20680 21053 20839 21184 20752 20968 20946 41254 21672 21824 21671 21785 21405 21864 21580 21549 21393 21916 21448 21847 21539 21848 21327 21636 21521 21287 20903 21463 21133 21441 21143 21607 21134 21407 23322 21852 21327 21834 21325 21673 21425 21677 21523 21639 21447 21560 21348 21707 21480 21643 21463 21642 21303 21651 21425 21760 21351 21706 21366 21549 21262 21651 21399 21670 21344 21589 21337 21629 21491 21621 21377 21684 21536 21666 21280 21728 21447 21707 21451 21728 21460 21714 21437 21715 21452 21674 21496 21658 21419 21681 21353 21799 21314 21778 21409 21693 21425 21808 21456 21663 21557 21645 21394 21635 21335 21664 21209 21784 21404 21729 21440 21563 21477 21514 21497 21800 21563 21555 21685 21494 21537 21564 21595 21641 21559 21721 21368 21538 21416 21660 21318 21730 21382 21522 21401 21534 21341 21623 21359 21533 21578 21514 21527 21524 21587 21400 21707 21453 21737 21520 21734 21514 21671 21393 21518 21550 21433 21536 21404 21755 21288 21824 21847 21871 21289 21664 21440 21456 21595 21592 21461 21413 21677 21397 21835 21385 21733 21559 21705 21552 21715 21560 21477 21607 21636 21473 21735 21514 21685 21437 21665 21513 21584 21591 21477 21595 21591 21571 21692 21575 21744 21381 21760 21537 21617 21510 21508 21526 21664 21508 21684 21435 21686 21442 21655 21605 21472 21576 21547 21551 21751 21467 21721 21454 21765 21515 21515 21561 21701 21460 21729 21301 21831 21419 21776 21485 21523 21618 21742 21338 21842 21399 21767 21478 21570 21512 21670 21440 21831 21207 21870 21441 21436 21547 21591 21441 21811 21280 21869 21349 21741 21554 21504 21552 21713 21356 21847 21239 21765 21531 21632 21571 21728 21241 21924 21265 21594 21499 21712 21303 21819 21520 21668 21541 21638 21349 21586 21400 21876 21380 21674 21608 21572 21368 21620 21382 21840 21248 21731 21539 21779 21322 21764 21271 21698 21437 21625 21455 21623 21304 21792 21257 21709 21463 21925 21370 21760 21357 21741 21458 21575 21437 21674 21416 21611 21478 21569 21490 21593 21430 21736 21288 21589 21549 21689 21450 21688 20823 21721 21425 21568 21491 21735 21342 21680 21397 21606 21539 21440 21485 21783 21254 21669 21548 21975 21524 21673 21365 21664 21477 21544 21442 21649 21404 21727 21396 21571 21693 21463 21367 21808 21315 21593 21834 21515 21505 21856 21297 21492 21787 21721 21422 21815 21625 21619 21687 21717 21492 21779 21492 21672 21731 21505 21556 21808 21587 21600 21664 21668 21521 21841 21374 21632 21857 21449 21347 21863 21328 21552 21752 21256 21778 21515 21531 21629 21664 21476 21817 21538 21465 21553 21792 21351 6337 14263 16054 17164 17734 17703 18131 18299 18327 18343 24513 21882 21618 21696 21476 4054 18567 19113 19771 19690 19868 19736 20140 19793 20071 24882 21843 21664 21830 21297 21798 19362 20352 20424 20781 20379 20758 20667 20743 20615 26880 21685 21934 21637 21607 21645 19858 20590 21192 21017 21035 20909 21376 20800 21337 21025 22129 21565 21936 21408 21792 19420 21213 21149 21676 20980 21648 21348 21323 21324 21555 21923 22033 21465 21783 21619 21696 21536 21844 21407 21752 21602 21725 21465 21820 21368 21912 21472 21520 21382 21876 21312 21815 21419 21656 21431 21802 21335 21776 21600 21650 21415 21824 21345 21634 21578 21684 21408 21760 21403 21799 21464 21565 21364 21850 21254 21805 21481 21590 21415 21834 21314 21708 21487 21670 21456 21788 20784 21724 21451 21729 21370 21774 21348 21721 21390 21669 21440 21575 21398 21796 21312 21783 21279 21770 21368 21746 21361 21767 21340 21708 21523 21740 21355 21720 21436 21639 21475 21626 21543 21639 21334 21763 21376 21611 21564 21596 21594 21637 21377 21720 21428 21620 21529 21504 21676 21600 21728 21651 21559 21596 21367 21542 21380 21705 
40202 37478 42756 38017 42123 33872 35409 42003 41857 36692 32804 32621 33785 36850 35122 33411 41222 37690 42320 43104 36135 42914 33924 34186 41641 37458 42375 41061 35670 32519 35306 33878 33308 34599 34472 42786 37000 42289 36458 42120 36867 33037 34118 35328 42948 35352 33280 33466 34330 32757 35860 42421 36415 41995 37130 40801 37494 41990 36660 42768 36790 33464 34836 34128 33355 33942 41936 34954 33756 42594 34263 33264 39492 33700 34262 34487 35972 32851 35648 33315 35801 33102 35779 33596 36105 42328 36400 42413 35505 32628 35002 42507 35895 42882 35897 33206 35624 42560 36208 33160 35404 33213 40356 34364 35067 34097 35811 32861 34158 33376 34382 33454 41136 38139 32656 33969 33108 34464 33837 35801 36071 37432 33472 34569 41901 33062 41222 33548 32546 34162 32743 34759 34810 37716 36417 37717 34519 34152 31883 32787 33550 33069 32624 33545 33201 34565 35069 37840 36428 39137 36970 35527 34776 34921 32792 35299 33066 35813 37902 36252 37552 35024 37696 35392 37751 34247 36337 33095 33601 33355 37369 34493 35641 35274 36740 36844 38216 36352 38317 37776 36368 37319 36624 35638 18154 17195 17317 26692 23397 24746 34240 32950 36624 40117 37485 33792 42421 40172 40998 38524 39927 38971 38576 38196 38898 37065 38480 36009 37600 34561 38860 37133 39336 36244 40472 37219 41169 38042 41471 38597 40588 38640 40248 38421 41136 37612 39413 37338 39025 35248 38375 37447 40776 36380 40016 37482 41808 38167 42006 38349 41778 37763 41545 38325 41088 37472 39956 37421 38960 35990 38733 36887 40296 34305 40303 37584 40834 39161 41825 39381 42288 39072 42560 39360 41412 38928 42009 37136 41509 35862 40000 35536 40679 36864 40357 37315 41244 37952 40554 38717 40797 38504 42717 39040 41804 38742 41575 37684 40438 38087 39109 36999 42304 37721 41408 36289 42416 36903 41818 38016 41356 40202 41813 39392 40256 36476 41418 38001 41460 38912 41285 40457 41829 37849 41257 38480 40624 39463 42248 38458 41138 39128 41365 39306 42795 39762 40924 37281 41545 38349 41976 40026 42408 39555 40567 40264 43149 40536 40103 38256 41920 41617 41328 37861 40230 41190 42832 37964 40458 40137 43249 37376 39749 41269 42305 37960 40407 41562 41827 39624 40628 32771 38537 40320 42823 40051 39265 41728 41522 38704 40872 41850 40169 40301 42720 23761 29936 36952 39111 34410 39692 40232 36123 34252 37938 35008 36018 34708 38848 33344 39312 34564 40032 41859 41997 39984 41849 40872 41639 33319 39562 33152 38216 33316 40713 42611 41060 35344 42499 38956 42421 41456 40961 34013 39781 42598 39430 33933 39884 42592 41444 41112 42427 42801 40661 42681 41765 33650 38954 33728 42344 41811 41551 43189 40176 33797 38984 33905 40706 41942 41546 42480 40097 34873 39497 32708 41045 41844 40734 33953 37304 34452 41522 43324 41572 34296 40709 34880 39150 33399 40673 42720 39814 35610 39789 42536 41531 42372 40003 34960 39404 42400 41636 33486 40197 33689 39874 42594 41024 34177 32797 35160 40064 32845 39104 34439 39424 42373 40395 34493 39040 33735 41104 41959 41416 34805 39831 42261 40605 33652 37729 33111 40055 43062 39635 33059 40023 43136 40760 42306 41210 33503 38626 32997 39941 34611 38929 33601 40631 34470 40221 34491 40550 41536 40764 34196 40120 42857 40786 33654 40851 33541 40282 33681 40632 41968 40832 34414 40932 34011 40256 33408 41141 34410 40251 42827 41797 42496 40625 33440 40850 42115 40280 42811 42903 42995 33069 42380 43008 34517 39044 42832 41843 33815 40904 41715 41258 33866 33056 38792 38793 41103 34184 38254 35696 34912 42020 40262 35801 34131 40903 42241 41675 36330 33104 42093 40039 42368 33792 34343 41168 40570 40820 33325 33289 33488 39558 41249 42568 36081 41698 40580 41840 41943 33873 35363 40056 41536 35417 42555 34248 39912 38003 41866 35639 42432 42992 41096 33681 33705 33354 40631 41548 42012 34963 33404 42600 39540 33901 34140 34090 41808 41357 41429 34465 41970 33657 40584 32759 41169 34488 42457 34379 40002 36909 42247 34694 42690 33367 41318 33604 42937 35220 42154 33076 40514 34529 42304 35793 42794 33088 39415 33544 42272 35189 41408 34240 40224 42711 41029 35343 42036 35283 40727 43235 41040 35341 42695 36311 40759 33223 40709 33620 41216 36084 41738 34996 38755 43186 42075 36025 42752 35351 40833 33262 39852 35148 42453 36091 41728 34201 38801 34520 41607 36179 41674 35899 40343 42408 39344 34304 39128 34880 40541 35408 41312 34400 39585 34469 40933 34198 41324 35821 42032 33040 40601 34249 40593 34295 41173 36295 40776 34153 39528 33971 39393 34709 40512 34408 40876 34723 39140 42482 40499 33591 41304 35764 41836 34764 41656 33920 40553 34202 40064 33629 42176 35098 41416 39633 37304 31989 41070 34703 31925 36183 34333 35880 32688 41142 42076 33984 41557 34933 33297 34628 40472 33901 40032 34273 41779 34230 33379 33674 40496 42028 34606 33220 41407 35186 42424 36132 32880 42613 41377 37873 41638 33045 41355 36393 33009 41904 40822 42093 42167 33869 32695 35732 42483 42368 41094 41416 42090 33454 34389 36517 41824 33698 40449 41728 41949 43088 36645 34632 41472 34669 40401 42288 42585 33792 35392 34718 41306 41328 40867 41731 33060 35112 34891 33013 41492 42183 34716 34821 34596 42537 34822 40327 34016 40864 35595 42903 35913 42285 42864 41985 33172 33553 34385 33434 33229 41185 43117 42245 34960 33769 35211 33365 42632 42242 33808 42901 35519 33713 42720 41101 34647 32937 34936 42578 33089 36104 35584 33538 35633 41824 32951 32809 36136 42565 34080 41821 35959 33207 33350 39109 36360 42208 34225 40865 34685 42577 33814 40543 35792 42293 42775 41898 35492 41037 34432 33123 35019 40176 36313 42208 43013 42912 34616 40960 35858 40162 36672 41552 35400 42355 33462 42784 34727 41385 36035 40737 36065 39127 36213 40097 36153 39655 36240 39893 36502 40448 35908 41178 35974 40192 35671 38677 36236 39076 36215 34647 42737 38379 41936 37336 41037 38024 42919 39455 35281 42809 35149 41056 35386 40226 35938 40865 36705 40531 34196 41256 32810 32752 34443 42500 43020 41632 34821 40914 35893 40737 36017 40320 35060 40921 34496 32897 34856 41700 35530 39737 35416 40120 35789 40448 33953 40480 33345 41672 33402 42048 33930 40760 33648 36179 34896 41755 34240 42002 42672 42633 33776 42529 34452 40633 34727 39415 35674 40715 35194 41767 34913 42380 34436 41068 33216 41633 39031 32963 33376 32869 33543 32778 32692 41827 34679 42249 33511 42319 34514 41248 33721 32896 33812 42264 33280 41933 33970 42272 33283 41712 34200 42490 33908 33105 32361 33504 32395 35312 42202 35264 42020 35110 33536 33711 42363 33072 41266 43108 43301 40948 35911 40760 36023 41420 35150 41592 34512 41848 43145 34739 41333 36569 42228 34605 41740 33046 42369 41917 36280 41165 35073 41380 33632 41537 42584 36428 40680 43176 42728 36100 41052 35756 34323 42757 43127 36006 37064 35160 40695 35968 32904 33927 33489 32775 33301 35130 40375 35664 32951 33159 32864 42572 35393 33064 42412 36388 41431 33977 33872 33411 33096 33893 42553 35817 41229 33664 32733 33765 33258 34777 40500 35955 42868 34616 33976 34914 42133 35968 40855 34632 42570 33344 41593 37203 41396 36342 42672 42752 33648 34329 39287 36728 32570 33508 33280 35083 39296 36426 42518 33909 42760 36576 39842 37331 42720 34304 42536 36088 40673 34600 32602 34124 33874 37108 41741 33813 42421 35992 40971 34985 33076 35712 39884 36096 42768 34661 40880 36644 42764 34245 42178 36696 41954 33954 42357 37424 40928 36076 41424 36896 40944 34681 40996 36502 40782 34403 41632 35934 40368 34407 41516 34418 33025 33305 41773 34337 32567 33753 42481 35292 42257 35056 42052 35896 42411 35125 42180 36802 42340 34712 42192 36392 40423 34472 40600 36064 40013 33722 41540 35557 42384 35385 42281 35168 42160 35944 42474 34711 41819 33153 42348 34480 42432 34576 40333 33703 41876 36216 40717 34010 41500 35762 41092 34432 42236 35495 42060 33504 40232 33936 42321 33995 42433 33172 41676 35786 40384 34657 41894 34628 32733 34049 41580 33479 34295 35695 40488 32860 42295 36983 32797 41520 42777 34304 34177 33133 40720 33202 34023 35751 39976 33284 42240 36082 42779 41942 40808 33448 36688 33837 41032 33392 33927 36325 41485 33467 42624 35137 35646 32494 41036 33122 33477 36101 40192 42962 42066 33395 34763 41255 40628 33812 35001 35849 41203 33381 41869 34784 35756 33509 41437 35503 34278 32429 42848 37512 34692 34076 34596 28144 28288 33049 34423 38230 32708 31161 33719 34547 38471 37220 35047 41597 34460 35151 34790 42432 41653 42423 34832 33767 34311 41062 34224 34001 34085 26563 36352 32489 39652 39815 34185 41240 31853 33396 37485 36352 35702 33949 36712 34067 34248 42452 35837 34650 35634 42040 42561 42583 36588 42341 34350 39927 31530 34439 40649 38921 40953 41024 34568 42176 34125 40044 35504 35399 37128 40897 35382 32878 35764 41584 36440 42794 36320 42212 33776 41825 36854 42888 33267 41415 36811 34150 38285 36176 39504 34866 37307 37095 39537 34848 36232 34881 35972 41993 37158 33811 33345 41504 37760 42375 37100 33261 36580 41351 34478 32790 40609 36924 42700 39501 42376 39596 34379 39127 42277 42432 37127 41411 36826 41260 35064 42005 35240 32957 34297 42356 33729 41175 35557 42638 34816 42592 34697 40904 34737 41984 35746 41511 35453 41575 33735 40352 34712 41856 35017 41097 34099 41179 34768 42810 34618 41392 35123 32925 34464 40309 35532 42411 35617 42482 35597 42417 35497 42392 35607 42420 35104 42812 34926 42112 35113 41425 36514 40892 36020 41856 35456 42026 36359 42304 35168 33445 34416 41563 34560 41257 34743 39992 36085 41903 35689 42057 33928 42612 33180 42818 36367 33675 33297 34860 42852 33434 33440 33911 34287 33494 35317 41498 33355 41800 34922 40960 35641 41589 33147 41712 33527 41302 34663 41652 33525 33585 32717 32975 32743 33664 41608 35584 42519 35929 32755 35433 32820 34743 41585 33298 33315 42112 33269 41749 36213 40616 36484 36817 37304 40790 34729 42010 42568 34362 33733 42412 42310 35283 41760 36966 41707 35840 33575 35104 33153 35180 33367 42576 34499 34160 42456 35986 32833 34840 42323 34912 32792 33450 33846 42613 34352 33908 33492 34955 33683 35425 41564 35737 33078 34004 32679 32498 32831 34352 32587 34706 42277 35272 42137 34988 34022 42362 33895 33309 33424 35783 42664 35736 42522 36044 32968 32832 33362 35025 42375 35713 40845 36875 42199 35984 42928 33348 34013 35687 41240 36832 41960 36136 42721 33829 32628 34596 41995 36915 40108 37339 42256 42656 33751 33876 42061 36612 40408 37345 41472 36038 33317 32371 33013 35081 41433 37105 40518 35954 33205 33930 33495 35200 40356 37687 40384 34137 42981 35411 40936 36761 32752 34492 33163 34212 41301 33961 41643 37288 41544 35074 33984 33417 41415 34440 41529 36726 40030 35720 33193 35781 41060 35856 40568 35216 42360 34657 42587 34721 40736 36111 40320 35561 42625 37860 41751 35736 41594 36040 42391 34071 42305 35098 41899 34534 42641 33813 42643 34240 42103 35793 40608 34093 33363 34900 42321 35219 35964 35427 42012 33675 42752 35987 41383 34977 41751 34352 33127 41908 43254 36397 40311 34973 33297 38080 33024 34668 41569 34758 42656 33509 42061 34672 41840 35959 41696 33879 35107 42580 42045 36380 40993 34166 36516 32983 32493 36522 40732 43053 36451 35424 42176 36752 34387 34183 35008 35303 42760 36213 42798 35027 35495 32604 33190 35972 33772 33702 34387 34545 32800 36448 41836 34341 36738 42416 41683 37315 41032 33452 35626 40192 35993 32960 33064 34363 34427 42507 36724 33108 42442 33626 35809 41494 25100 37667 37195 37467 33689 33241 37861 39884 40163 40519 44858 37591 34246 34808 42550 31715 31978 37952 35319 34291 36136 34601 39087 35431 38496 38008 36801 34537 36472 40716 36236 40716 41244 42216 35659 41621 35223 34135 34780 33408 38650 35088 37783 34414 34117 34455 35876 33299 39572 37997 38233 36928 41388 35527 41248 38076 39844 33876 37470 41793 36167 41321 40400 39584 35048 37444 34361 41198 41421 41369 33703 37448 38666 42732 36373 34285 34806 32907 36499 42144 36018 33932 35488 42540 36764 41584 37605 42547 33098 41451 37285 40817 36701 42200 34784 42247 36489 41356 35941 33824 34292 42009 36552 41265 34437 33627 34758 41668 35741 41962 36537 42502 34009 41387 37035 40305 36562 42805 34198 42025 36850 40902 35482 43008 35063 42226 36329 35274 35431 42464 35716 41650 36201 41292 35665 41793 35032 42016 34053 41712 36296 40752 36288 40811 36011 41550 35888 41440 36102 41312 35491 32946 35526 41544 35564 42264 34741 42618 34660 33302 34315 41116 35936 41344 34497 33505 33829 33815 34224 41346 35559 42063 34471 33024 32352 34692 33750 35212 34471 33508 33832 41600 33523 41365 35459 
22709 22570 22448 22660 22477 22624 22645 22491 22840 22419 22648 22836 22557 22390 22904 22379 22626 22676 22577 22793 22671 22308 22895 22500 22579 22581 22486 22484 22588 22552 22552 22695 22362 22989 22213 22816 22533 22772 22583 22662 22554 22666 22649 22627 22605 22712 22409 22775 22257 22770 22440 22740 22416 22708 22538 22707 22512 22568 22499 22616 22521 22765 22486 22783 22485 22700 22481 22795 22330 22865 22262 22935 22240 22916 22222 22966 22231 22835 22198 22795 22108 22886 22381 22843 22464 22884 22364 22903 22359 22848 22140 22838 22104 22869 22344 22926 22207 22865 22089 22987 22231 22880 22172 22928 22122 22923 22264 22857 22265 22827 22280 22849 22309 22823 22404 22712 22453 22912 22360 22816 22317 22479 22348 22594 22263 22828 22275 22720 22354 22679 22275 22728 22183 22752 22336 22773 22205 22807 22256 22750 22321 22664 22205 22654 22157 22701 22322 22697 22456 22761 22800 22949 23019 23049 23134 23059 22736 22608 22630 22893 22426 22991 22752 22994 22840 23116 22747 23070 22808 23027 22683 22945 22653 22804 22611 22712 22743 22839 22712 22869 22793 22957 22871 57 7730 12814 14776 16231 16551 17608 17465 17926 17744 33875 26844 25445 24508 24483 24007 24044 23680 23744 23585 23712 23445 23655 23264 23522 23101 23472 23059 23466 22839 23287 22708 23145 22645 23121 22904 23327 22743 23149 22820 23148 22888 23253 22861 23255 22805 23216 22797 23144 22700 23040 22624 22960 22453 23016 22447 23118 22631 23111 22756 23165 22725 23154 22768 23090 22685 23144 22704 23045 22713 23040 22509 22959 22498 22770 22624 22912 22597 22999 22629 23168 22490 23012 22489 22976 22549 23021 22581 23093 22583 22966 22528 22789 22452 22845 22327 22861 22566 22774 22508 22901 22511 22919 22533 22891 22573 22983 22554 22999 22605 22959 22534 22877 22351 22879 22622 22859 22467 22864 22551 22885 22599 22953 22631 22768 22458 22752 22554 22825 22532 22962 22535 22795 22569 22785 22496 22928 22628 22734 22475 22759 22498 22802 22562 22805 22461 22725 22515 22804 22589 22913 22414 23208 22497 22758 22740 22721 22733 22720 22715 22865 22515 22688 22627 22830 22468 22656 22612 23004 22404 22577 22634 22828 22588 22679 22850 22639 22444 22801 22837 22488 22522 22935 22434 22569 22857 22628 22577 22839 22595 22609 22824 10969 16034 17820 18270 18566 19058 18789 19114 19537 19414 26861 24994 24545 24011 23787 23912 23492 23671 23140 23597 23049 23453 23089 23472 23047 23031 23063 23152 22855 23239 22789 23216 22765 23112 22912 23045 22876 22822 22916 22937 22804 23010 22634 23153 22482 23112 22628 22989 22729 23004 22877 22920 22622 23063 22471 23052 22647 23004 22631 22870 22661 22995 22450 23121 22636 22877 22629 22810 22631 23014 22319 23080 22652 22752 22637 22930 22675 23074 22434 22942 22608 22839 22490 23095 22342 22984 22567 22796 22476 23000 22370 22953 22599 22774 22492 23026 22396 22848 22624 22736 22559 22995 22400 22977 22509 22825 22448 22997 22446 22981 22418 22986 22380 22793 22460 22873 22411 22844 22528 22711 22424 22839 22514 22760 22384 22916 22401 22807 22460 22885 22312 22814 22471 22690 22406 22766 22450 22772 22304 22839 22450 22721 22409 22825 22489 22748 22479 22819 22452 22736 22553 22791 22460 23023 22522 22777 22567 22698 22516 22825 22552 22489 22493 22797 22503 22685 22473 22714 22528 22629 22391 22756 22554 22587 22460 22688 22529 22592 22437 22731 22551 22791 22738 22640 22618 22855 22425 22616 22556 22751 22690 69 17520 18875 19228 19905 19586 19946 20012 20364 20417 27248 23864 23940 23704 23600 23303 22567 22962 23203 23259 23064 22808 22873 22908 23149 22988 22735 22728 22900 22945 23073 22627 22661 22758 23015 22979 22647 22695 22646 22750 22798 22604 22503 22892 22694 22972 22583 22771 22535 23059 22652 22813 22461 22814 22727 22935 22569 22660 22599 22876 22724 22824 22405 22723 22718 22895 22663 22700 22433 22844 22639 22878 22532 22717 22489 22924 22612 22868 22392 22641 22500 22915 22613 22797 22350 22668 22504 22937 22561 22899 22416 22734 22445 22938 22600 22930 22390 22628 22441 22960 22577 22912 22499 22705 22460 22786 22560 22897 22416 22752 22351 22839 22443 22999 22509 22921 22295 22681 22368 22983 22477 22951 22379 22724 22452 22747 22503 22928 22494 22803 22305 22638 22432 22887 22502 22953 22336 22606 22318 22877 22477 23004 22447 22875 22349 22766 22437 22736 22327 22785 22364 22882 22445 22594 22433 22767 22324 22730 22447 22866 22451 22648 22434 22684 22322 22824 22391 22906 22355 22765 22437 22705 22391 22807 22336 22890 22417 22672 22299 22691 22309 22761 22406 22756 22488 22784 22311 22517 22345 22699 22397 22713 18491 20199 20144 20564 20501 20796 20695 20983 20869 39309 24047 23539 22919 23146 22837 23001 22781 23076 22776 22938 22529 22704 22562 22867 22629 22866 22689 22860 22471 22773 21943 22660 22584 22732 22720 22934 22692 22624 22359 22714 22512 22764 22685 22883 22647 22460 22530 22613 22535 22759 22792 22887 22489 22567 22482 22450 22572 22848 22728 22767 22432 22456 22423 22561 22555 22811 22726 22624 22433 22509 22469 22534 22595 22877 22730 22628 22521 22528 22495 22639 22677 22773 22664 22336 22575 22477 22797 22543 22829 22423 22752 22317 22673 22568 22839 22541 22748 22396 22515 22528 22721 22629 22691 22504 22641 22392 22607 22592 22839 22589 22753 22371 22573 22428 22758 22496 22757 22243 22609 22481 22780 22451 22689 22195 22730 22535 22805 22441 22566 22403 22871 22538 22667 22360 22856 22525 22769 22426 22891 22528 22797 22276 22873 22512 22656 22343 22901 22425 22590 22437 22805 22209 22785 22456 22697 22341 22909 22300 22840 22493 22609 22429 22805 22297 22981 22140 22940 22369 22826 22408 22854 22454 22635 22468 22688 22464 22720 22420 22753 22417 22794 22376 22795 22423 22797 22405 22818 22391 22812 22455 22744 17522 21288 21249 21591 21376 21941 21423 21842 21391 21969 23367 23236 22560 23022 22446 22883 22339 22820 22502 22822 22443 22745 22434 22695 22352 22822 22405 22755 22283 22841 22341 22793 22361 22696 22314 22787 22213 22737 22369 22904 22240 22884 22387 22720 22350 22784 22461 22716 22283 22688 22406 22768 22377 22700 22456 22641 22354 22644 22464 22594 22453 22605 22279 22656 22317 22732 22353 22669 22386 22574 22456 22448 22503 22610 22368 22644 22471 22656 22272 22630 22304 22635 22326 22722 22383 22706 22151 22707 22353 22747 22298 22731 22360 22680 22332 22723 22375 22745 22389 22784 22407 22759 21879 22797 22542 22680 22457 22664 22318 22622 22231 22630 22288 22556 22455 22511 22505 22480 22663 22434 22693 22471 22784 22301 22555 22404 22420 22711 22338 22786 21893 22727 22429 22594 22376 22533 22576 22341 22805 22560 22553 22417 22471 22680 22292 22864 22358 22503 22460 22475 22675 21925 22599 22332 22693 22392 22776 22491 22508 22457 22780 22263 22768 22335 22727 22537 22418 22565 22570 22456 22726 22267 22743 22471 22600 22577 22543 22463 22696 22466 22752 22340 22629 22514 22555 22451 22753 22176 22869 22408 22129 22455 22617 22455 22791 22370 22589 22435 22549 22399 22814 22255 22897 22424 22584 22434 22852 22183 22786 22356 22751 22541 22713 22195 22855 22343 21916 22438 22779 22298 22895 22287 22755 22460 22792 22073 22825 22359 22564 22403 22785 22185 22795 22318 22732 22200 22859 22284 22637 22351 22799 22205 22637 22438 22725 22294 22776 22397 22595 22264 22856 22379 22531 22349 22821 22304 22677 22368 22884 22240 22789 22266 22887 22200 22726 22256 22820 22314 22628 22331 22765 22332 22668 22317 22737 22427 22537 22377 22642 22333 22591 22240 22647 22160 22577 22122 22763 22104 22562 22287 22736 22181 22595 22167 22749 22148 22609 22240 22756 22269 22667 22273 22718 22223 22775 22310 22765 22387 22439 22234 22705 22436 22522 22265 22700 22386 22665 22317 22537 22291 22631 22287 22602 22331 22720 22373 22530 22299 22650 22417 22573 22332 22672 22432 22611 22253 22599 22401 22716 22373 22521 22297 22617 22482 22560 22487 22439 22473 22668 22201 22833 22384 22599 22550 22288 22338 22581 22546 22589 22303 22508 22426 22680 22301 22347 22438 22689 22690 22435 22346 22460 22579 22634 22310 22448 22475 22752 22380 22290 22328 22482 22675 22489 22245 22306 22394 22867 22440 22488 22337 22571 22710 22453 22672 22357 22488 22750 22522 22296 22342 22428 22659 22330 22451 22437 22764 22432 22624 22208 22613 55 11365 13107 14438 14887 15769 15901 16264 16284 16441 30827 27223 25609 25149 24386 24301 24016 24152 23764 23744 23533 23776 23537 23595 23175 23340 23266 11566 16212 17811 17760 18583 18536 18936 18705 19032 18816 28124 25320 24755 23982 24325 23911 23981 23389 23822 23556 23793 23368 23446 23177 23604 23161 23408 16423 19145 19463 20098 19816 20197 20344 20604 20411 36016 24976 24564 23947 24135 23357 23712 23310 23660 23131 23267 23124 23509 22960 23200 22928 23428 22875 19833 20312 21201 20690 21093 20920 21529 20869 21244 26556 24368 23285 23619 23197 23424 22794 23466 23025 23092 22948 23303 22801 22944 22937 23287 22676 18110 21320 21952 21437 22232 21832 21948 21577 22283 21570 24087 23037 23229 22694 23233 22681 23165 22588 23040 22600 23053 22716 23024 22663 22886 22713 22840 22731 22876 22677 22958 22609 22889 22589 22932 22576 22963 22601 22891 22436 22912 22596 22948 22382 22848 22409 22929 22424 22887 22416 22981 22508 22850 22546 22747 22556 22758 22615 22829 22484 22788 22417 22884 22471 22872 22421 22794 22477 22650 22496 22732 22552 22775 22518 22778 22350 22853 22428 22891 22456 22788 22523 22695 22474 22736 22605 22753 22567 22720 22442 22678 22477 22666 22377 22736 22470 22724 22665 22759 22384 22808 22416 22870 22548 22772 22434 22784 22453 22843 22461 22823 22493 22848 22354 22896 22354 22874 22896 22944 22394 22860 22460 22737 22482 22678 22300 22569 22583 22456 22681 22449 22677 22547 22836 22733 22665 22502 22502 22528 22467 22688 22419 22826 22416 22796 22511 22588 22610 22540 22666 22385 22745 22334 22775 22279 22844 22354 22810 22578 22649 22586 22530 22569 22610 22624 22648 22500 22790 22295 22856 22455 22674 22596 22443 22628 22594 22545 22733 22351 22792 22345 22817 22496 22520 22537 22536 22535 22695 22407 22829 22196 22853 22390 22775 22450 22530 22502 22682 22464 22824 22246 22887 22294 22759 22439 22615 22519 22694 22272 22843 22227 22933 22327 22694 22444 22633 22446 22895 22321 22871 22232 22777 22368 22563 22428 22814 21501 22917 22183 22779 22451 22496 22449 22792 22278 22864 22220 22796 22332 22716 22384 22582 22445 22798 22250 22869 22341 22700 22334 22673 22229 22863 22145 22680 22311 22727 22224 22676 22256 22734 22261 22705 22418 21944 22218 22736 22326 22664 22264 22672 22412 22561 22233 22794 22338 22652 22259 22694 22255 22653 22201 22736 22163 22597 22375 22668 22196 22804 22347 22695 22263 22634 22304 22653 22229 22680 22345 22610 22405 22576 22372 22637 22348 22644 22481 22518 22364 22734 22343 22550 22395 22571 22368 22540 22254 22666 22262 22584 22415 22583 22316 22696 22304 22551 22390 21862 22392 22742 22253 22587 22358 22464 22528 22519 22336 22695 22310 22535 22489 22336 22421 22698 22371 22621 22645 22402 22365 22665 22196 22480 22621 22419 22387 22673 22278 22523 22533 22407 22418 22509 22342 22613 22379 22313 22577 22541 22203 22594 22477 22315 22473 22474 22343 22599 22412 22385 22529 22599 22780 22488 22584 22541 22521 22638 22277 22528 22336 22484 22702 22258 22608 22446 22629 22248 22749 22371 22431 22446 22637 6215 12019 13453 14571 15259 15545 15464 16069 16049 43612 28889 26300 24883 24880 24368 12617 17165 18236 18098 18922 18704 18944 18921 19348 18930 28597 25584 24806 24576 24483 10675 19426 19687 20097 20229 20588 20222 20818 20449 20725 27265 25280 24039 24496 23863 23963 20240 21149 21033 21560 21217 21549 21255 21665 21049 27676 24224 23968 23637 23888 23079 21669 21866 22195 22001 22494 21882 22489 21915 22279 22007 23904 23114 23577 22945 23357 23035 23214 22965 23357 22702 23346 22960 23037 22873 23280 22648 23381 22877 22956 22616 23216 22470 23168 22774 22891 22617 23121 22736 22985 22720 22908 22586 23063 22805 22920 22562 22902 22629 23061 22227 23015 22676 22841 22465 23064 22338 22823 22577 22906 22517 23019 22464 22871 22535 22794 22492 22890 22440 22883 22458 22793 22512 22800 22441 22897 22461 22784 22615 22773 22540 22738 22465 22881 22416 22882 22407 22895 22423 22893 22490 22771 22537 22644 22576 22701 22472 22726 22342 22807 22475 22717 22487 22672 22634 22598 22423 22816 22500 22690 22640 22507 22635 22560 22588 22635 22361 22657 22313 22861 22517 22798 22405 22709 22459 
22272 22969 22078 23014 22313 22767 22364 22897 22163 23065 22137 22933 22305 22742 22303 22839 22217 22957 22097 23111 22243 22628 22249 22819 22176 22808 21870 22771 22166 22677 22144 22767 22225 22820 22156 22843 22086 23040 22098 23023 22091 22839 22097 22926 22148 22796 22036 22737 21989 22818 21897 22824 22092 22811 22117 22789 22141 22643 22144 22545 22231 22705 22227 22813 22129 22573 22276 22576 22257 22663 22263 22742 22160 22809 22102 22656 22261 22616 22025 22658 21976 22728 22008 22672 22048 22572 22075 22709 21989 22634 22064 22656 22134 22712 21984 22588 22140 22644 22327 22537 22363 22528 22411 22513 22576 22520 22486 22407 22624 22496 22646 22362 22701 22437 22640 22493 22535 22636 22515 22298 22421 22377 22348 22417 22346 22484 22212 22644 22262 22618 22229 22849 22176 22855 22283 22560 22705 22599 22360 22517 22369 22532 22512 22342 22612 22352 22669 22417 22803 22103 22737 22177 22729 22215 22713 22357 22545 22411 22263 22547 22340 22473 22336 22503 22609 22348 22823 22338 22867 22030 22839 22187 22645 22385 22725 22421 22388 22539 22633 22293 22808 22383 22709 22191 22800 22046 80 73 77 75 73 71 73 43669 37760 31735 27209 25173 22954 22272 20960 20928 20020 20111 19339 19680 18951 19379 18791 19225 18593 19145 18554 19019 18557 19079 18390 18885 18409 18840 18087 18840 18218 18664 18320 18673 18353 18829 18455 18981 18531 18944 18758 19129 18757 18985 18653 18775 18327 18789 18421 18693 18453 18799 18432 18745 18644 18871 18701 19012 18775 19045 18888 19283 19107 19456 19180 19232 18752 18957 18633 19080 18546 18995 18775 19087 18895 19216 19005 19311 19094 19451 19285 19520 19453 19501 19193 19040 19128 18995 19209 19111 19544 19239 19520 19217 19664 19473 19682 19469 19518 19407 19738 19444 19524 19445 19584 19261 19456 19269 19334 19439 19607 19609 19854 19527 19799 19351 19815 19201 19584 19429 20018 19572 19948 19367 19695 19379 20013 19607 20073 19577 19828 19513 19958 19676 20148 19751 20055 19432 19861 19596 20232 19694 20203 19409 20070 19729 20366 19706 19962 19653 20431 19744 20118 19778 20499 19698 20313 19480 20512 19750 20296 19811 20494 19816 20231 19745 20523 19781 20335 19858 20528 19713 20320 19991 20363 19817 20731 19739 20305 20020 20494 19943 20602 95 0 79 1697 3000 5412 5883 7446 7537 43629 43687 35235 29776 27745 25166 24683 23106 23271 22209 22533 21716 21576 21343 21744 20899 21786 20807 21605 20787 21349 20528 21350 20696 21149 20669 21189 20597 21169 20487 21233 20424 21141 20471 20982 20586 21003 20620 20919 20576 20952 20446 21141 20355 20971 20520 20920 20637 21135 20518 21116 20387 20957 20504 21012 20611 20864 20596 21019 20507 21019 20565 20943 20630 20887 20485 21111 20360 20955 20885 20656 20550 21200 20283 20983 20752 21241 20801 21107 20508 20971 20896 20807 20668 21178 19936 20971 20832 20800 20624 21132 20590 20984 21038 20768 20771 21355 20570 20983 21075 20877 20634 21223 20707 20937 20727 21322 20604 20992 21088 20728 21213 21050 20909 20784 21218 20893 21015 20818 21342 20807 20956 21108 21154 20800 21010 21097 21179 20848 21056 21093 21210 20773 21120 21140 21184 20792 21207 21123 21134 20814 21339 20943 21340 20629 21318 21057 21300 20739 21304 21074 21289 20672 21352 21092 21395 20657 21316 21104 21478 20702 21351 21041 21483 20757 21359 20980 21514 20945 21218 20869 21616 21113 21242 20745 21623 21027 21443 20637 21488 21005 21653 109 55 5381 9285 10275 11975 11937 13321 13452 14409 43065 33482 28607 26867 24796 24412 23020 23298 22567 23040 22049 22341 21724 22417 21719 22286 21560 21941 21174 22023 21316 22097 21130 21831 21189 21997 21356 21783 20896 21731 21153 21916 21175 21706 21069 21678 21196 21868 20976 21683 21039 21716 21053 21678 21027 21746 21123 21760 20864 21715 21096 21837 21085 21648 21015 21858 21088 21725 21076 21555 21047 21637 21149 21868 21074 21620 21180 21693 21171 21714 21041 21634 21196 21763 21223 21687 21129 21675 21181 21645 21303 21687 21033 21606 21210 21641 21271 21697 21100 21633 21100 21767 21271 21801 21091 21490 21217 21622 21344 21879 21135 21326 21231 21514 21367 21787 21460 21616 21065 21649 21261 21677 21481 21977 21082 21495 21079 21517 21319 21925 21650 21468 21184 21493 21329 21865 21703 21785 21261 21654 21196 21613 21469 21861 21742 21806 21185 21516 21345 21638 21408 21781 21783 21674 21197 21600 21579 21701 21788 21566 21757 21339 21507 21261 21664 21622 21913 21554 21845 21591 21513 21376 21473 21727 21796 21722 21690 21639 21552 21230 21612 21487 21800 21703 21873 21478 21699 21265 21683 21459 21935 21594 5986 11224 13995 14693 15820 16216 16915 17095 17711 40560 31530 26829 25293 23831 23567 22881 23248 22503 22758 22120 22400 21803 22263 21849 22507 22016 22331 21783 22243 21533 21939 21542 22149 21715 22357 21718 22228 21527 22103 21302 22113 21581 22327 21543 22279 21412 21923 21560 22087 21664 22192 21656 22118 21415 21871 21440 22073 21650 22147 21573 21989 21261 21831 21464 22258 21601 22279 21534 22150 21406 22046 21376 22043 21397 22132 21509 22182 21349 21452 21380 22116 21351 22187 21607 22048 21511 22021 21344 22060 21432 22090 21334 21974 21333 22103 21238 22135 21587 22081 21365 22089 21389 22168 21469 22201 21460 22037 21377 21946 21469 22055 21465 21986 21318 21977 21457 22087 21656 22037 21288 22088 21574 22122 21555 22032 21418 21997 21592 22096 21392 21987 21504 22093 21432 21989 21556 22150 21476 22023 21483 22103 21443 22071 21591 22106 21436 21993 21607 21933 21419 22012 21704 22091 21504 22156 21449 22095 21888 21780 21633 21891 21620 22275 21490 21997 21721 21865 21799 22112 21790 21899 21604 22007 21592 22211 21641 22219 21495 22276 21547 22214 21506 22401 21504 22266 21560 22291 21481 22263 21516 22336 10770 16128 17414 18458 18976 19164 19729 19683 19904 19923 27840 25251 23478 23683 22522 22874 22295 22272 22272 22100 22149 22156 22168 22152 22027 22085 21941 22039 22189 22027 22318 21723 22223 21853 22087 21960 22024 22061 21884 22073 22063 22048 22151 21863 22144 21784 22164 21870 22080 22012 21970 21976 22295 21932 22315 21737 22517 21604 22325 21645 22199 21885 22010 21982 22105 21881 22199 21777 22179 21540 22281 21652 22306 21715 22330 21920 22268 21980 22144 21963 22161 21975 22017 21975 22023 21970 22073 21800 22117 21953 22028 21819 22171 21872 22053 21810 22064 21786 22186 21704 22216 21763 22135 21753 22106 21826 22149 21812 22197 21809 22190 21780 22279 21721 22274 21789 22253 21743 22392 22032 22391 21650 22489 21498 22496 21617 22308 21745 22272 21725 22144 21911 22144 21793 22273 21572 22411 21379 22311 21562 22289 21707 22196 21745 21504 21610 22164 21527 22360 21445 22312 21433 22250 21661 22064 21680 22028 21532 22277 21509 22299 21475 22282 21702 22360 21673 22336 21488 22439 21287 22314 21684 22235 21668 22212 21575 22464 21525 22228 21760 22204 21757 22108 21765 22283 22138 22288 21736 22115 21804 22223 21682 22321 21709 22241 21747 22339 21649 22399 21677 22220 21783 22210 21673 22282 21686 22301 21648 22112 21783 22128 21723 22352 21584 22249 21832 22155 21776 22378 21495 22185 21913 22027 21755 22434 21592 22102 21994 22119 21779 22231 21865 22625 21945 22279 21556 22256 22125 21984 21859 22160 22099 22105 21783 22539 21703 21989 21877 22536 21646 22064 22097 22232 21700 22172 22113 22039 21792 22103 22182 21955 21801 22242 22060 22016 21836 22351 22039 22105 21818 22498 21873 22217 22012 22250 21874 22016 22304 22112 22004 21905 22409 22093 22115 22331 22365 22061 22176 21851 22385 22118 22051 22170 22307 22056 22054 21814 22293 22171 22151 21766 22172 22148 22280 21812 22272 22144 22321 21709 21588 22124 22455 21841 22057 21863 22453 22032 22247 22035 22387 22051 22293 21772 22361 22032 22310 21698 22299 21964 22560 21916 22207 21793 22480 21972 22267 21683 22461 21943 22480 21682 22380 21958 22535 21894 22210 21734 22535 21898 22427 21568 22449 21978 22553 21768 22319 21800 22673 21847 22442 21805 22657 21901 22541 21591 22484 21949 22587 21820 22299 21828 22537 21968 22180 21897 22515 21945 22420 21729 22460 21957 22661 21880 22381 21546 22710 21693 22661 21863 22288 21754 22529 21919 22352 21753 22482 21747 22685 21792 22265 21737 22406 21874 22473 21659 22279 21792 22459 21873 22272 98 85 77 81 72 1458 2189 4071 4286 5656 43671 43438 37856 33402 29736 28415 26837 26162 24905 25229 24070 24277 23369 23844 23174 23543 22993 94 86 3374 6637 9163 10085 11601 11872 12841 43720 43701 38649 33336 29476 28117 26384 26025 24887 24693 23856 24338 23543 23934 23053 23606 23011 23440 92 6524 10269 13189 14033 15442 15309 16352 16373 43676 38036 31945 28434 27192 25667 25130 24269 24378 23901 23763 23266 23561 23165 23360 22951 23152 124 9316 13193 15649 16985 17701 17805 18561 18886 18816 37991 31075 27503 26096 24840 24965 23676 23802 23520 23589 22972 23230 23175 22997 22590 23157 22956 11672 16184 18680 19031 19769 19973 20417 20236 20724 20661 28945 25984 24776 23890 24064 23191 23397 22965 23095 23018 22826 23067 22817 22676 22824 22885 22752 22900 22344 22925 22501 22929 22343 22875 22541 22786 22513 22773 22515 22698 22451 22640 22532 22576 22513 22565 22649 22383 22568 22317 22444 22560 22418 22720 22224 22769 22118 22779 22340 22612 22501 22333 22409 22543 22293 22628 22405 22656 22068 22743 22052 22696 22293 22688 22291 22448 22434 22584 22363 22692 22201 22840 22041 22784 21941 22765 21767 22855 22197 22709 22266 22585 22280 22567 22268 22548 22262 22454 22222 22484 22240 22721 22157 22534 22086 22802 22165 22701 22161 22732 22075 22680 22212 22492 22235 22493 22144 22588 22291 22481 22208 22504 22231 22538 22183 22639 22151 22743 21994 22757 21993 22880 21968 22790 21810 22733 22025 22625 22080 22572 22129 22624 22091 22505 21941 22674 22055 22607 22029 22595 22211 22788 21735 22664 21849 22709 21979 22568 22034 22601 21958 22715 21905 22695 21829 22752 21909 22713 21899 22537 22067 22784 22094 22549 22101 22657 22000 22696 21959 22656 22247 22474 22148 22455 22068 22750 21985 22643 22032 22519 22106 22576 22213 22799 22149 22545 22096 22715 22416 22680 21992 22628 22183 22581 22097 22610 22062 22605 22156 22582 22069 22400 22301 22375 22176 22494 22055 22621 22000 22445 22395 22537 22199 22482 22011 22684 21952 22470 22365 21682 22157 22331 22064 22752 22084 22506 22114 22280 22445 22405 22112 22562 21972 22533 22133 22326 22467 22439 22243 22577 21958 22585 22145 22304 22551 22292 22138 22757 21398 22487 22192 22199 22491 21935 22774 22317 22410 22426 22445 22200 22515 22212 22487 22304 22288 22323 22439 22120 22581 22229 21827 22362 22381 22240 22611 22126 22506 22361 22316 22436 22509 22169 22658 22240 22017 22327 22441 22192 22617 22185 22643 22216 22456 22250 22579 21975 22664 22287 22365 22322 22697 22106 22656 22236 22822 22238 22468 22150 22809 21949 22535 22394 22391 22135 22806 21882 22725 22181 22372 22249 22663 22092 22816 22111 22422 22256 22550 21939 22772 21940 22661 22136 22592 21990 22873 21839 22715 22115 22519 22097 22793 21901 22658 22255 22470 22205 22763 21821 22816 22125 22508 22254 22678 22119 22908 22098 22491 22139 22740 21824 22805 22133 22676 21981 22765 21880 22628 22065 22625 22011 22704 21817 22688 22065 22522 21873 22805 21856 22639 22062 22599 21940 22804 21804 22670 21903 22597 21853 22857 82 77 77 82 1830 4293 4596 6145 6037 43653 43682 43702 36113 32243 29340 107 87 6846 9304 11575 12188 13509 13395 14263 43627 43686 40727 34617 30560 29079 116 6369 11152 14267 15098 16660 16604 17469 17409 18009 43692 36179 30818 28952 27159 3469 10456 15229 16571 18121 18493 19173 19040 19768 19278 39796 31783 28683 26631 26256 25065 16221 18727 20084 20240 21016 20650 21159 21194 21089 32853 28551 25682 25204 24674 24320 23766 24193 23552 23696 23392 23396 23202 23432 23081 23506 22892 22990 23117 22944 22743 23341 22621 22897 23061 22779 22704 23232 22462 22808 22944 22583 23029 22738 22807 22736 22884 22390 22960 22709 22615 22717 22883 22405 22875 22712 22640 22672 22819 22497 22721 22755 22536 22717 22761 22516 22914 22482 22501 22620 22789 22414 22895 22416 22759 22599 22593 22401 22970 22198 22917 22331 22748 22378 22811 22514 22726 22467 22729 22455 22718 22368 22945 22061 22981 22377 22791 22474 22573 22417 22562 22322 22949 22131 22917 22288 22755 22396 22724 22263 22933 22038 22956 22183 22925 22320 22739 22241 22738 22293 23222 22260 22832 22288 22817 
