# Supplementary material for: An Active Feature Selection Strategy for DWT in Artificial Taste
Source: Hindawi journal article supplement (doi:10.1155/2018/9709505), 2018-01-01
Supplement: f1 [file 9709505.f1.zip › redWine-hi-2.txt]

43456 43456 43462 43477 49 9565 18179 20128 21700 21895 22784 22487 23213 22862 23574 23075 23592 23247 23840 23287 23784 23383 23690 23346 23942 23521 23775 23796 23777 23760 23812 23908 24028 23860 23674 23808 23952 23786 24035 23663 24161 23530 24140 23652 23988 23714 23860 24024 23831 24032 23894 23952 23801 23860 24107 23707 24294 23804 24214 23685 24056 23753 23884 24072 23793 24128 23996 23980 23848 23876 24155 23736 24184 23731 23973 23829 23970 24147 23815 24188 23591 24149 23688 24225 23820 23982 23971 24084 23877 24182 23814 24220 23621 24192 23789 24192 23942 23909 24054 24179 23861 24176 23761 24394 23736 24165 23844 24004 23975 24096 23749 24314 23768 24410 23752 24275 23817 24040 23835 24125 23866 24241 23622 24304 23642 24256 23816 24186 23945 24247 23856 24394 23592 24393 23590 24177 23793 24049 23842 24306 23872 24385 23689 24352 23883 24140 23863 24320 23618 24402 23542 24277 23765 24083 23808 24324 23777 24448 23524 24384 23736 24113 23790 24245 24130 24384 23622 24297 23813 24105 23848 24333 23713 24356 23604 24236 23938 24268 23751 24393 23428 24375 23735 24374 2576 18257 19530 21223 21242 21859 21514 22185 21540 22314 32168 26735 24753 24976 24304 24662 24124 24608 23734 24487 23996 24378 23907 24481 23681 24505 23895 24299 23778 24253 23858 24448 23819 24309 23904 24720 23808 24343 23788 24265 23769 24135 23892 24226 23808 24328 23859 24263 23845 24081 23861 24336 24194 24215 23907 24103 23781 24054 23850 24316 23694 24199 23907 24239 23907 24128 23840 24202 23692 24141 23901 24133 23877 24340 23767 24136 23881 23994 24026 23891 23966 24194 23868 24042 24192 23960 24022 24055 23815 24245 23684 24055 24113 24160 23905 24183 23789 24177 23746 24027 24164 23925 23959 24045 23792 24336 23660 23980 24157 23936 24208 23928 23948 23925 23935 24285 23786 24338 24064 24280 23733 24226 23801 24032 23808 24017 23709 24025 24097 23868 24161 23931 24281 23783 24385 23706 24390 23700 24213 23931 24101 24007 23559 23844 24311 23720 24200 23879 24018 24009 24145 23713 24256 23868 24117 23964 24296 23690 24273 23986 24287 23605 24281 23849 24138 23689 24124 23910 24286 23881 24218 23747 24037 23762 24404 23894 24391 23726 23820 23563 24237 23827 24377 23795 24366 23828 24384 23701 24136 23530 24090 23632 19439 21666 22708 22374 23093 22537 23239 22530 23213 36692 26336 24312 24750 24066 24631 23990 24632 24096 24637 24023 24423 23712 24402 23916 24521 23951 24412 23834 24197 23763 24487 23900 24496 23767 24384 23808 24429 23618 24288 23656 24406 23828 24281 23726 24209 23877 24310 23712 24060 23703 24295 23709 24279 23677 24440 23703 24260 23362 24320 23816 24385 23600 24151 23732 24313 23544 24100 23787 24359 23616 24160 23863 24210 23591 24172 23876 24137 23753 24136 23803 24276 23729 24117 23929 24136 23929 24253 23923 24103 23829 24215 23856 24102 23736 24124 23850 24117 23755 24066 23850 24174 23642 24080 23809 24192 23798 24006 23956 24104 23799 24101 23896 24195 23886 23818 24007 24199 23797 24040 24013 24118 23767 24059 23954 24128 23876 23995 23884 24193 23905 24007 23694 24279 24000 23953 23688 24296 24027 23828 23671 24212 24055 23826 23702 24123 24087 23937 23959 24055 24156 23931 23840 24153 24078 23959 23870 24073 24183 23961 23932 24002 24149 23948 23907 23734 24025 23897 24101 23771 24365 23819 24089 23752 24324 23714 24080 23866 24313 23868 24124 23992 24308 23621 24101 23995 24132 23635 24147 23986 24060 23752 18446 22161 22724 22810 23302 22761 23304 23104 23497 22983 26403 24644 24457 24204 24611 24101 24483 24088 24314 23788 24449 23781 24237 23880 24355 23623 24405 23840 24116 23888 24224 23659 24384 23800 24235 23846 24353 23748 24450 23544 24296 23928 24157 23842 24407 23592 24448 23954 24361 23868 24240 23828 24379 23604 24498 23628 24391 23836 24173 23788 23910 23752 24473 23623 24428 23703 24343 23821 24202 23834 24224 23783 24359 23800 24424 23566 24423 23715 24328 23781 24256 23872 24071 23827 24276 23736 24356 23741 24206 23698 24249 23520 24366 23653 24369 23588 24393 23740 24201 23596 24160 23809 24140 23704 24226 23881 24164 23597 24250 23705 24207 23729 24370 23652 24321 23480 24352 23522 24178 23634 24261 23621 24149 23747 24046 23733 24098 23666 24207 23820 24010 23816 24090 23849 24076 23753 24088 23840 24065 23812 24096 23848 24007 23904 24040 23843 24036 23894 24092 23836 24125 23886 24184 23772 24199 23772 24202 23705 24187 23849 24058 23954 24014 23886 24100 23824 23968 23761 24500 23770 24103 23910 23898 23909 24040 23848 23991 23883 23997 23931 23885 24040 23868 23869 24017 23987 24052 23888 24044 23859 24116 23814 22726 22999 23508 23256 23639 23234 23702 23401 23837 26860 24709 23932 24313 23811 24275 23837 24180 23848 24051 23842 23974 24073 23974 24092 23969 24094 23860 24327 23888 24120 23944 24130 23932 24017 23877 23992 23962 23784 24310 23761 24268 23874 24269 23674 24096 23932 24203 23927 23903 24205 23895 24259 23720 24329 23952 24304 23570 24327 23663 24250 23840 24227 24027 24161 23848 24206 23895 24091 24033 24005 24049 24049 23917 23954 23993 24017 23904 24201 23707 24391 23653 24322 23561 24346 23653 24288 23850 24071 23916 24241 23756 24217 23856 23960 23904 24309 23637 24098 24016 24189 23643 24286 23904 24212 23755 24285 23788 24068 23844 24320 23509 24320 23850 24079 23699 24454 23463 24471 23779 24374 23688 24424 23500 24346 23799 24126 23713 24343 23554 24392 23655 24248 23793 24096 23596 24472 23469 24308 23786 24194 23784 24376 23760 24401 23496 24408 23680 24263 23789 24090 23837 24237 23680 24451 23481 24368 23799 24346 23716 24253 23683 24148 23658 24143 23684 24241 23628 24373 23474 24389 23618 24261 23636 24194 23585 24112 23633 23851 23770 24103 23872 24135 23656 24205 23478 24288 23639 24327 23563 24352 23632 22857 23174 23770 23296 23795 23453 23826 23421 23888 23419 24618 23797 24216 23714 24264 23730 24273 23671 24236 23776 24190 23626 24128 23829 24105 23749 24204 23882 24064 23853 24064 23748 24136 23804 24192 23697 24102 23570 24135 23680 24196 23235 24199 23640 24215 23783 24250 23773 24197 23728 24184 23676 24049 23840 24012 23872 24057 23896 23929 23988 23891 23846 23916 23985 24166 24095 24034 23968 24432 24105 23961 24008 24321 24080 23320 24096 23789 24149 23730 24192 23573 24200 23703 24198 24134 24126 23837 24209 23937 24071 23904 24183 24008 24182 23950 24091 23858 24065 23939 23968 23716 23901 23894 24001 23703 23963 23912 23960 24006 23872 24076 24189 23627 24155 23796 24237 23781 24217 23860 24267 23879 24210 23844 23872 23971 23989 23989 23869 23980 23872 24014 23988 24048 23967 23982 24140 23895 24200 23766 24168 23724 24332 23648 24248 23572 24382 23648 24288 23492 24384 23569 24345 23609 24320 23601 24247 23754 24212 23792 24335 23729 24249 23868 24164 23770 24108 23840 23974 23910 24069 23834 24151 23915 24130 23841 24249 23719 24321 23698 24292 23687 24338 23559 24345 23462 24434 23449 24487 23625 24356 23674 24281 23681 24406 23722 24152 23824 24121 23793 24156 23703 24251 23642 24330 23523 24366 23514 24372 23559 24340 23604 24398 23582 24381 23655 24346 23761 24148 23566 24183 23624 24119 23577 24240 23552 24264 23570 24276 23783 24297 23489 24176 23780 24130 23740 24187 23636 24112 23717 24096 23516 24121 23597 24295 23586 24311 23541 24356 23560 24272 23552 24135 23527 24140 23703 24128 23850 24182 23765 23989 23689 24156 23697 24271 23682 24152 23640 24151 23766 24061 23812 23975 23700 23981 23668 24085 23637 24222 23617 24091 23562 24130 23706 24027 23792 24206 23737 23996 23877 24121 23709 24140 23584 24034 23724 24025 23901 24012 23977 23923 23927 24012 23784 24132 23600 23989 23616 23978 24013 23826 24089 23870 23813 23813 23697 24105 23729 24425 23943 24135 23754 23882 23982 23847 24197 23746 23921 23793 23790 24133 23776 24207 23712 23959 23746 23831 24081 23885 24021 23626 24206 23791 24188 23769 24185 23810 24043 23849 24168 23868 24154 23808 24164 23596 24172 23632 24179 23821 23995 23945 24080 23966 23995 24000 24167 23740 24156 23568 24292 23590 24325 23780 24217 23728 24244 23924 24067 23920 24077 23714 24250 23735 24388 23552 24295 23481 24423 23613 24256 23824 24055 23801 24032 23852 24243 23716 24296 23700 24314 23664 24344 23468 24404 23593 24333 23651 24217 23749 24276 23728 14980 19460 21380 21338 22039 21591 22407 21800 22584 43450 29649 25096 25088 24148 24738 24156 24624 24016 24344 23894 24346 23757 24397 23773 24558 23719 24384 18865 22532 22199 23015 22412 23061 22535 23158 22633 38478 25712 24983 23992 24792 24011 24722 23926 24536 24012 24460 23817 24569 23837 24453 23877 24267 70 22249 22563 23168 22884 23373 22838 23364 23119 23574 28356 25184 24364 24503 23928 24369 24094 24389 23821 24219 23910 24375 23818 24184 23852 24419 23964 18999 22414 23408 23235 23591 23337 23583 23437 23664 23319 25664 24504 24480 24033 23996 24008 24453 24046 24074 23761 24231 24198 24110 23955 23974 24171 24134 22345 23534 23729 23956 23650 24007 23558 23913 23532 23561 24285 24480 24346 24087 23872 24065 24288 24052 23833 23921 24284 24126 23852 23882 23948 23954 24205 23617 24260 23928 24304 23668 24271 23922 24195 23735 24216 23996 23580 23853 24227 24052 23936 23861 24334 23969 24076 23951 24266 23630 24170 23859 24310 23671 24407 23922 24023 23715 24345 23932 24136 23861 24237 23693 24258 23825 24120 23843 24359 23548 24360 23928 24220 23700 24350 23719 24146 23837 24299 23540 24369 23828 24083 23729 24407 23558 24310 23831 24373 23650 24467 23456 24301 23765 24301 23632 24369 23741 24189 23734 24272 23584 24338 23733 24151 23808 24320 23613 24331 23701 24195 23598 24391 23538 24312 23537 24152 23704 24217 23624 24369 23556 24192 23723 24106 23669 24168 23404 24281 23591 24071 23782 24273 23398 24277 23600 24205 23602 24209 23621 24147 23608 24236 23760 24093 23739 24132 23699 24228 23782 24220 23767 24024 23784 24040 23645 24028 24135 24089 23768 24052 23905 24105 23728 24153 23696 24168 23750 24089 23782 24011 23657 24098 23625 24227 23679 24054 23800 24490 23820 24077 23687 24181 24096 24156 23783 23931 23964 24052 24121 24104 23746 24120 24028 24152 23912 23779 23895 24212 24093 23832 23709 24069 23815 24257 23810 23885 23793 23770 24007 23840 24167 23926 23947 24056 23708 24174 23713 24252 23808 24241 23910 23753 24132 23796 23832 23949 24066 23846 23932 23841 24064 23915 24330 23785 24271 23735 24210 23956 24131 23869 24055 23936 24028 23914 23907 23952 24104 23893 24244 23844 24253 23630 24288 23575 24397 23804 24372 23702 24147 23864 24038 23809 24036 23820 23780 23881 24389 23699 24413 23512 24295 23536 24238 24080 24256 23798 24236 23829 24128 23822 24066 23831 24433 23704 24224 23703 24459 23596 24444 23420 24413 23515 24435 23650 24341 23626 24253 23766 24256 23805 24083 23842 24066 23760 24159 23819 24277 23748 24337 23658 24392 23628 24424 23489 24200 23554 24261 23512 24324 23589 24287 23644 24150 23613 24112 23757 24103 23772 24121 23656 24192 23697 24284 23540 24212 23392 24163 23429 24275 23573 24261 23541 24192 23586 24208 23700 24093 23721 24133 23781 24064 23844 24144 23824 24115 23749 24097 23701 24133 23618 24132 23855 24141 23648 24240 23714 24216 23684 24160 23693 24048 23801 24017 23872 24167 23904 23778 23905 24008 23949 23826 23994 23961 23898 23933 23908 24055 23783 24004 23780 24016 23609 24013 23663 24020 23667 24185 134 18637 20396 21847 21621 22296 21780 22447 21968 22505 35108 27114 24552 24654 24167 24426 19685 22216 22565 22616 22807 22656 23012 22880 23021 39568 26676 24654 24746 24352 24438 19728 22642 22945 23104 23185 23585 23124 23611 23178 23619 25754 24899 24512 24378 24228 18203 22793 23657 23056 23820 23296 23871 23310 23776 23509 25991 24519 24589 24126 24678 23993 23611 23525 23914 23608 24005 23509 24249 23400 24190 25527 24608 24142 24388 24033 24424 23760 24532 23706 24553 23847 24412 23954 24231 23846 24433 23680 24548 24110 24439 23899 24200 23848 24450 23576 24404 23859 24139 23784 24427 23856 24245 23757 24466 23869 24263 23568 24423 23725 24408 23921 24282 23787 24343 23716 24207 23557 24167 23808 24282 23635 24160 23884 24188 23737 24356 23637 24208 23649 24173 23721 24333 23692 24202 23568 24100 23596 24391 23778 24241 23620 24137 23671 24069 23602 24131 23838 24381 23856 24161 23735 24113 23704 24113 23904 24250 23904 24137 23760 24186 23690 23940 23767 24088 23829 24209 23786 24067 23815 24241 23637 24157 23873 24167 23825 24048 23632 24097 24059 24197 23825 23880 23835 24196 
21701 20861 21687 20672 21540 20945 21619 21067 21649 21131 21675 20920 21329 20746 21504 20902 21625 21093 21685 21079 21642 20708 21442 20853 21770 20824 21480 20787 21492 20872 21607 20977 21458 20839 21360 20846 21512 21100 20385 21205 20401 20972 20400 21015 20484 21079 20396 21197 20424 21134 20196 21191 20367 21207 20497 21105 20541 20878 20548 20933 20525 21079 20488 21302 20816 21344 20240 21133 20340 21141 20425 21264 20427 21037 20394 21229 20460 21286 20556 21222 20519 21191 20747 21112 20659 21209 20425 21265 20520 21370 20328 21250 20400 21197 20641 21253 20561 21209 20375 21226 20973 21292 20579 21096 20558 21464 20647 21213 20591 21150 20966 21228 20588 21157 20730 20495 20767 21052 20695 21352 20550 21243 20604 21110 20736 21176 20724 21006 20760 21102 20615 21188 20522 21177 20748 21108 20678 21093 20630 21223 20524 21196 20767 21088 20874 20999 20737 21326 20560 21126 20874 20715 21068 20884 20859 21208 20639 21113 20962 20948 20926 20984 20833 21291 20744 21017 21062 21013 20922 21072 20792 21309 20696 21072 21036 21104 20942 21263 20762 21190 20880 20981 21175 20938 55 5682 10961 14080 15574 15703 16125 16912 16617 17129 36244 25116 22611 21604 21985 21147 20993 21227 21495 20937 21592 20695 21506 20923 21223 21127 21217 21043 21333 20902 21314 20996 21076 21112 21260 20759 21472 20956 21095 21096 21232 20835 21363 20608 21313 20929 21216 20840 21354 20474 21355 20775 21065 20889 21239 20503 21386 20644 21293 20845 21233 20893 21495 20636 21479 20672 21111 20840 21334 20702 21448 20589 21436 20796 21154 20793 21350 20580 21600 20649 21359 20620 21260 20647 21514 20485 21589 20636 20709 20656 21267 20600 21496 20515 21569 20730 21490 20839 21270 20722 21352 20512 21421 20663 21152 20826 21276 20745 21431 20487 21497 20476 21633 20656 21354 20673 21207 20645 21330 20668 21325 20722 21350 20620 21216 20587 21339 20617 21140 20722 21160 20627 21248 20749 21365 20584 21443 20572 21434 20535 21437 20711 21285 20769 21267 20448 21341 20608 21316 20708 21213 20672 21248 20709 21301 20632 21115 20736 21370 20709 21217 20715 21351 20760 21248 20681 21263 20941 21172 20823 21196 20640 21303 20823 21264 20753 21175 20761 21136 20740 21173 20918 21189 20970 21169 20855 21072 20938 21025 20703 21052 63 10757 15923 17422 17531 18279 18199 18615 18533 18785 41512 24142 21920 21738 21429 21716 21466 21457 21145 21199 20967 21232 20919 21346 21314 21390 20969 21080 20855 21041 21365 21396 20996 21110 20880 21128 21291 21181 20913 20957 20843 21497 21067 20999 20929 20977 21312 21062 21510 20857 21259 21025 21465 20873 21193 20864 21360 21015 21106 20829 21396 20973 21355 20772 21205 21179 21168 20801 21324 20992 21321 20792 21328 21099 21333 20678 21397 21120 21734 20729 21525 21001 21350 20704 21504 21141 21259 20823 21337 20966 21191 20730 21377 20877 21223 20656 21511 20941 21432 20684 21591 21037 21447 20567 21432 20889 21348 20519 21448 20938 21513 20616 21350 20872 21552 20594 21491 20923 21515 20482 21446 20855 21502 20547 21591 20825 21588 20689 21427 20793 21659 20999 21307 20868 21595 20762 21259 20868 21606 20843 21175 20757 21589 20815 21248 20693 21569 20777 21244 20648 21560 20541 21344 20656 21508 20555 21186 20775 21476 20715 21356 20849 21463 20608 21312 20736 21257 20704 21191 20876 21385 20706 21401 20749 21416 20586 21280 20658 21399 20758 21408 20701 21476 20610 21536 20711 21268 20620 21377 20726 21430 20658 11540 17078 18546 18661 19351 18833 19780 19269 19712 19464 24170 21475 21622 21159 21495 20924 21600 20909 21122 20994 21347 20849 21491 20871 21243 20928 21457 20871 21242 20772 21282 20960 21269 20805 21383 20914 21752 20839 21312 20733 21304 20801 21239 21127 21097 21009 21307 20838 21331 20956 21107 21124 21080 21078 21159 20877 21427 20920 21154 20918 21123 21184 21083 21097 21117 20934 21456 20875 21189 20922 21017 21133 21104 21233 21015 20935 21223 20823 21372 20887 21355 21037 21047 21061 20938 21152 21261 21357 21005 21255 21074 20939 21177 20967 21475 20948 21344 20877 21142 21057 20980 21378 20823 21097 20997 21309 20960 21352 21068 21226 21005 21223 20884 21336 20960 21463 21078 21309 21051 21342 20912 21351 20863 21436 20871 21449 20754 21456 20882 21467 20931 21345 20951 21451 21031 21434 20897 21482 20873 21427 20996 21446 20835 21527 20829 21517 20807 21453 20920 21413 21000 21407 20938 21504 20792 21440 21029 21366 20873 21586 20717 21600 20913 21568 20788 21497 20656 21635 20688 21519 20755 21556 20583 21561 20604 21593 20648 21568 20637 21621 20658 21574 20646 21576 20710 21585 20773 21615 20776 21539 20819 2688 18359 20020 19560 19747 19771 20388 19838 20391 20021 25292 21550 21578 21174 21460 21060 21401 20992 21473 21019 21431 21017 21508 20830 21637 20802 21656 20183 21754 20592 21642 20643 21691 20705 21464 20792 21461 20876 21376 20776 21529 20791 21300 20910 21300 20923 21379 20853 21443 20791 21383 20771 21316 20811 21409 20631 21470 20668 21486 20649 21395 20612 21420 20682 21461 20747 21479 20695 21607 20629 21575 20641 21525 20732 21328 20842 21256 20816 21393 20878 21259 20891 21419 20773 21333 20838 21425 20823 21321 20957 21207 20859 21361 20840 21367 20886 21297 20673 21522 20921 21422 20858 21349 20809 21196 20945 21255 20823 21293 20903 21272 20720 21493 20877 21180 20951 21244 20819 21618 20957 21066 21125 21307 20877 21379 20914 21104 21141 21188 21017 21275 20942 21253 21086 21031 21178 21216 20849 21422 20928 21275 21020 21015 21415 21135 21007 21195 20830 21477 20771 21123 21031 21051 21365 21052 20992 21263 20832 21394 20996 21317 21136 21126 21092 21179 21296 20983 21099 21112 20840 21410 21221 21376 20928 21205 21091 20999 21290 20770 21223 20974 21267 20978 21376 21041 21198 21024 21332 21008 21642 20969 21446 19276 20701 20441 20940 20390 21086 20382 20945 20628 32749 21513 21377 21240 21265 21117 21268 21052 21388 21125 21440 20918 21607 20887 21540 20777 21532 20657 21662 20751 21465 20964 21376 20997 21447 20949 21428 21034 21192 21117 21234 21018 21346 20896 21383 20864 21425 20937 21427 21001 21479 20855 21581 20727 21705 20746 21585 20742 21587 20780 21632 20598 21701 20636 21643 20640 21723 20673 21627 20627 21604 20631 21688 20688 21669 20709 21634 20695 21573 20758 21595 20634 21586 20740 21624 20828 21596 20870 21623 20740 21646 20653 21686 20580 21643 20681 21667 20624 21705 20634 21590 20588 21491 20642 21498 20864 21408 20807 21312 20867 21404 20903 21464 20878 21426 20992 21304 21007 21263 20880 21560 20673 21409 20683 21346 20714 21275 20788 21427 20640 21480 20710 21428 20642 21466 20625 21436 20727 21533 21056 21405 20783 21335 20813 21411 20793 21228 20764 21319 20877 21433 20932 21280 20887 21233 20940 21222 21036 21332 20966 21137 20886 21128 20960 21130 20809 21224 20865 21245 20829 21274 20873 21351 20919 21409 20871 21488 20949 21486 21361 21457 20823 21354 20741 21244 20824 21264 21066 21256 21221 21104 21182 21619 21303 21072 21041 21084 21023 21232 20921 21493 21031 21561 21104 21317 20914 21353 20923 21263 21042 21162 21282 21134 21293 21028 21380 21179 21256 21085 21095 21189 21201 21269 21003 21287 20940 21381 21207 21366 20883 21248 21010 21146 21310 20987 21399 20891 21424 20749 21392 20714 21463 20871 21454 20992 21304 21045 21045 21149 21208 21171 21192 21114 21264 21153 21445 21091 21484 20986 21493 20807 21478 20907 21504 21019 21527 20918 21336 21082 21459 21049 21404 20852 21628 20823 21459 20903 21544 20936 21314 20950 21390 20945 21458 20936 21557 20649 21680 20780 21472 20913 21043 20951 21278 20961 21512 20867 21576 20637 21707 20786 21624 20808 21526 20948 21394 20912 21485 20871 21690 20536 21599 20681 21586 20701 21581 20913 21376 20908 21407 21003 21414 20876 21564 21284 21707 20503 21640 20809 21517 20903 21353 20680 21472 20785 21473 20737 21530 20743 21344 20801 21528 20967 21253 20823 21377 20761 21359 20677 21623 20685 21566 20598 21426 20729 21496 20829 21444 20867 21223 20720 21273 20824 21549 20865 21463 20935 21449 20765 21412 20935 21286 20924 21313 20944 21260 20982 21385 20920 21463 20860 21393 20783 21349 20762 21383 20881 21291 21034 21219 20998 21207 20999 21334 20915 21488 20831 21461 20947 21366 20818 21355 21014 21281 21257 21270 21195 21072 21084 21195 21089 79 11384 15157 15735 16821 16474 17356 17025 17656 43350 29892 23239 21910 21824 21357 21408 21088 21244 21315 21295 21353 20952 21376 20964 21571 20962 61 11587 17559 17831 18540 18621 19000 19111 19079 19424 43363 24395 21960 21875 21351 21765 21269 21615 21081 21613 21169 21285 21286 21361 20989 21506 21131 50 17340 19236 19110 19892 19675 20115 19584 20299 19959 27832 22164 22166 21527 21639 21092 21642 21185 21629 20834 21527 20980 21716 20752 21508 21047 21689 14436 19417 19647 20619 20002 20608 19896 20796 20273 20755 22772 22121 21236 21919 20722 21623 21071 21889 20892 21508 20864 21772 20976 21881 20816 21656 21081 19684 19995 20970 20591 21179 20506 21048 20496 21338 32365 21930 20954 21972 20802 21571 20848 21793 20758 21478 20865 21600 20746 21491 20798 21481 20874 21488 20887 21596 20936 21401 20748 21650 20687 21461 20839 21585 20703 21457 20796 21463 20688 21359 20916 21483 21111 21425 20924 21430 20951 21546 20913 21613 20903 21405 20906 21323 20999 21376 20893 21496 20965 21293 20969 21421 20909 21397 20969 21382 20880 21446 20841 21048 20912 21290 20855 21336 20984 21244 20918 21409 20994 21140 21236 21329 20897 21463 21128 21316 21226 21302 20904 21446 21112 21141 21189 21323 20861 21253 21213 21092 21157 21339 20932 21205 21266 21143 21104 21339 20887 21214 21223 21052 21100 21337 20916 21173 21271 21063 21099 21386 21013 21196 21355 21035 21233 21026 21325 20986 21572 20800 21465 21032 21211 21058 21352 20892 21415 21090 21347 21225 21329 21061 21426 20840 21413 21126 21351 21207 21290 20935 21541 20725 21553 21006 21344 20976 21472 20940 21481 20916 21537 20896 21480 21037 21505 21001 21592 20688 21619 20836 21530 21044 21298 21051 21549 20780 21661 20747 21601 20904 21424 20992 21412 20834 21603 20804 21664 20776 21666 20881 21509 20883 21617 20835 21565 20817 21662 20758 21633 20887 21394 21069 21312 20879 21534 20849 21671 20687 21747 20574 21588 20724 21465 20771 21556 20661 21333 20903 21341 20847 21483 20640 21491 20883 21465 20762 21595 20832 21353 20825 21392 20701 21347 20887 21553 20772 21459 20614 21551 20748 21617 20736 21549 20816 21320 20789 21278 20836 21468 21041 21456 21066 21448 20876 21392 20812 21435 20880 21407 20811 21371 20835 21303 20948 21340 20913 21265 20983 21374 20872 21293 20817 21409 20992 21337 20887 21440 21079 21337 20998 21178 21073 21066 21204 21422 21170 21173 21064 21203 20992 21360 20965 21234 20757 21297 21228 21475 20857 21458 21043 21312 20981 21071 21128 20992 21111 21165 21386 20999 21331 21053 21249 21223 21115 21211 20994 21373 20848 21449 21081 21447 20948 21211 21482 20840 21410 20855 21630 20967 21493 20878 21349 21128 21383 21238 21230 21100 21098 21065 21327 21113 20817 21089 21465 21037 21589 20880 21555 20838 21474 20972 21519 20889 21395 20937 21428 21038 21354 21156 21291 21095 21329 21015 21300 20964 21471 20951 21569 20920 21703 20881 21663 20664 21556 20672 21638 20751 21687 20683 21591 20484 21651 20825 21662 20846 21581 20867 21541 20909 21580 20928 21474 20976 21453 20944 21326 20976 80 8362 14691 16169 16984 16837 17731 17312 17991 17669 42214 25049 22375 21322 21751 20976 13592 17399 18888 18563 19447 18799 19560 18871 19779 43314 25027 21656 22080 21204 21818 13983 18983 19097 19911 19480 20197 19658 20496 19559 43347 23131 22412 21373 21821 21189 14218 19365 20289 20086 20706 20071 20736 20176 20809 20264 23634 21679 21664 21248 21552 9742 20463 20400 20984 20642 21108 20784 21041 20533 21034 22829 21888 21233 21472 21228 21470 21168 21437 21000 21563 21067 21448 21073 21098 21251 21236 21354 21528 21007 21612 21154 21137 21271 21132 21079 21574 21078 21141 21378 21283 20902 21153 21433 21323 20910 21081 21319 21545 21179 21049 20800 21067 21357 21400 21108 21168 21189 21187 21510 21234 21507 20997 21202 20965 21591 21100 21639 21026 21401 20911 21380 21120 21504 21232 21427 20941 21202 20983 21396 21057 21517 21100 21408 21005 21353 20983 21507 21008 21506 21022 21495 20462 21400 20792 21419 21139 21485 21035 21637 21081 21499 20821 21395 20841 21467 21000 21723 20973 21465 21018 21428 20834 21544 20967 21632 20878 21409 20893 21711 20961 21577 20730 21566 20845 
21736 21409 21664 21539 21849 21892 21945 21621 21757 21482 21467 21355 21397 21533 21776 21735 21850 21572 21639 21445 21666 21420 21735 21909 21788 21505 21560 21408 21452 21651 21963 21696 21728 21925 21575 21565 21488 21819 21605 21799 21499 21527 21533 21777 21669 21742 21599 21504 21648 21732 21696 21603 21356 21667 21665 21845 21549 21479 21577 21806 21640 21589 21308 21824 21680 21782 21365 21705 21775 21883 21421 21589 21595 21924 21603 21704 21257 21624 21191 21476 21251 21341 21446 21176 21667 21221 21554 21441 21543 21411 21366 21452 21494 21285 21529 21191 21704 21449 21400 21537 21364 21488 21399 21323 21668 21216 21588 21280 21559 21537 21440 21464 21493 21319 21704 21195 21718 21297 21606 21385 21388 21457 21510 21438 21697 21193 21691 21346 21613 21388 21494 21441 21623 21349 21721 21194 21708 21364 21504 21408 21497 21312 21661 21088 21667 21295 21558 21385 21571 21320 21760 21101 21760 21338 21570 21364 21545 21312 21700 21100 21766 21313 21591 21421 21470 21337 21677 21171 21808 21348 21559 21370 21548 21353 21764 21120 21687 21411 21521 21438 21740 21012 21761 21376 7623 13260 15767 16248 17379 17419 17861 17852 18237 43308 24075 21474 21686 21399 21531 21445 21615 21435 21917 21399 21545 21260 21608 21371 21667 21187 21691 21376 21690 21296 21798 21336 21680 21235 21606 21302 21595 21424 21515 21347 21780 21404 21488 21456 21857 21278 21645 21401 21641 21346 21540 21440 21641 21296 21671 21321 21616 21489 21648 21382 21667 21307 21733 21301 21611 21461 21540 21406 21648 21415 21621 21464 21931 21429 21569 21282 21760 21168 21599 21600 21459 21424 21681 21429 21582 21468 21507 21687 21419 21440 21704 21651 21544 21466 21387 21602 21338 21412 21852 21387 21557 21547 21447 21690 21393 21373 21752 21316 21686 21307 21447 21487 21475 21740 21164 21696 21440 21433 21606 21456 21496 21344 21732 21258 21725 21514 21469 21719 21464 21704 21256 21745 21234 21805 21424 21618 21575 21539 21552 21488 21529 21721 21358 21684 21454 21490 21593 21510 21431 21720 21520 21638 21603 21344 21402 21772 21484 21479 21501 21781 21521 21601 21576 21764 21320 21383 21447 21728 21621 21704 21446 21465 21296 21661 21447 21878 21550 21617 21367 21526 21421 21784 21553 21824 21462 21649 21351 21564 21184 21573 21314 5297 16635 18746 18748 19373 19246 19674 19419 19858 18795 24588 21314 21703 21400 21825 21467 21763 21529 21767 21441 21658 21248 21653 21456 21821 21543 21826 21426 21579 21346 21845 21478 21824 21301 21575 21355 21765 21394 21717 21234 21690 21372 21661 21257 21624 21406 21806 21332 21690 21333 21776 21431 21644 21181 21689 21432 21760 21328 21650 21312 21683 21376 21750 21267 21708 21360 21692 21410 21713 21384 21741 21369 21681 21467 21732 21458 21792 21405 21635 21543 21608 21313 21573 21465 21609 21470 21478 21416 21671 21405 21404 21507 21724 21401 21416 21479 21789 21346 21752 21497 21656 21405 21497 21408 21755 21425 21773 21323 21638 21473 21617 21274 21811 21499 21504 21386 21736 21515 21496 21324 21728 21440 21522 21335 21837 21493 21497 21243 21676 21609 21443 21437 21729 21639 21461 21307 21628 21677 21575 21481 21472 21693 21604 21377 21337 21825 21587 21300 21475 21816 21536 21255 21479 21760 21495 21275 21492 21728 21518 21271 21452 21712 21544 21337 21340 21508 21701 21658 21482 21811 21581 21917 21357 21761 21661 21730 21499 21638 21489 21453 21544 21706 21568 21433 21692 21743 21527 21632 21664 21753 21457 21665 18395 19741 19782 20332 20193 20166 20348 20664 20135 30112 21916 21632 21392 21709 21473 21495 21476 21751 21280 21730 21483 21685 21556 21820 21441 21706 21596 21658 21493 21914 21538 21780 21629 21594 21550 21847 21437 21819 21619 21530 21531 21741 21368 21867 20954 21776 21566 21536 21511 21760 21339 21864 21312 21776 21473 21588 21489 21684 21390 21865 21194 21809 21358 21798 21509 21488 21497 21677 21430 21877 21287 21825 21270 21782 21509 21720 21481 21536 21523 21807 21553 21731 21459 21799 21361 21861 21322 21835 21316 21819 21391 21709 21336 21610 21388 21749 21331 21708 21600 21721 21318 21732 21408 21713 21161 21765 21429 21769 21251 21753 21455 21607 21208 21683 21332 21588 21399 21943 21481 21620 21506 21668 21384 21672 21415 21595 21409 21675 21312 21734 21393 21591 21371 21552 21385 21701 21331 21679 21251 21761 21495 21729 21305 21727 21447 21696 21287 21656 21549 21648 21351 21658 21504 21719 21186 21753 21208 21737 21637 21719 21440 21709 21328 21698 21275 21713 21304 21704 21336 21639 21334 21621 21360 21706 21304 21559 21428 21646 21504 21570 21504 21632 21527 21481 21608 21529 21680 21530 21560 21795 21564 17389 20584 20710 20862 20740 20856 20860 20892 20928 20942 22256 21587 21768 21507 21664 21416 21754 21353 21885 21421 21893 21385 21856 21376 21927 21345 21698 21384 21698 21470 21511 21458 21619 21669 21437 21771 21528 21795 21351 21737 21493 21477 21488 21469 21606 21461 21543 21872 21484 21638 21577 21562 21578 21537 21661 21625 21623 21555 21601 21680 21543 21588 21760 21429 21606 21425 21685 21356 21690 21351 21636 21585 21641 21681 21520 21802 21376 21856 21337 21755 21458 21703 21452 21795 21521 21538 21613 21618 21618 21735 21367 21739 21614 21544 21428 21879 21434 21559 21617 21810 21361 21692 21584 21751 21278 21813 21576 21496 21420 21816 21389 21660 21527 21745 21281 21876 21504 21600 21453 21859 21264 21838 21476 21589 21504 21709 21461 21846 21382 21721 21563 21547 21488 21833 21241 21829 21445 21671 21542 21667 21527 21787 21229 21821 21456 21704 21560 21597 21541 21771 21394 21883 21327 21828 21440 21798 21472 21571 21469 21479 21527 21810 21396 21980 21292 21798 21354 21796 21280 21743 21238 21612 21464 21628 21536 21704 21431 21781 21249 21741 21260 21790 21443 21777 21453 21748 21381 21682 21259 21625 21367 21634 20912 21315 21190 21388 21216 21480 21152 21470 21316 23651 21442 21812 21357 21863 21344 21640 21424 21552 21474 21651 21533 21608 21504 21643 21479 21669 21361 21717 21444 21643 21413 21777 21402 21836 21415 21734 21347 21760 21415 21649 21494 21548 21357 21561 21420 21511 21512 21667 21462 21723 21488 21623 21569 21640 21597 21725 21515 21581 21506 21559 21474 21633 21493 21610 21495 21659 21523 21658 21340 21623 21385 21592 21286 21567 21329 21668 21433 21602 21365 21674 21448 21605 21434 21512 21349 21584 21290 21561 21455 21685 21474 21571 21491 21569 21506 21623 21625 21508 21522 21538 21634 21497 21508 21464 21782 21508 21825 21479 21900 21471 21697 21312 21517 21312 21715 21460 21796 21342 21853 21294 21800 21265 21744 21433 21799 21536 21699 21488 21606 21627 21713 21679 21585 21586 21652 21691 21443 21645 21504 21619 21540 21688 21607 21517 21581 21611 21689 21504 21664 21612 21691 21492 21751 21495 21692 21530 21767 21300 21856 21345 21800 21320 21802 21227 21833 21357 21766 21416 21821 21435 21725 21617 21644 21568 21816 21582 21702 21544 21504 21640 21514 21570 21641 21561 21793 21453 21867 21409 21848 21496 21880 21261 21872 21309 21908 21385 21825 21512 21743 21575 21601 21596 21560 21542 21661 21560 21735 21560 21751 21409 21826 21351 21893 21199 21824 21287 21959 21431 21723 21482 21659 21542 21730 21472 21659 21485 21649 21309 21756 21453 21793 21428 21821 21357 21817 21530 21621 21254 21690 21361 21632 21445 21700 21440 21637 21267 21651 21362 21688 21352 21719 21334 21818 21424 21770 21329 21643 21371 21763 21584 21712 21591 21532 21425 21532 21400 21699 21355 21725 21335 21614 21351 21587 21494 21568 21545 21508 21376 21530 21377 21687 21274 21680 21379 21672 21401 21641 21592 21597 21556 21643 21557 21745 21494 21896 21350 21649 21340 21563 21729 21655 21625 21440 21472 21661 21422 21808 21482 21856 21408 21548 21544 21489 21781 21487 21632 21420 21434 21623 21465 21872 21353 21850 21424 21677 21504 21495 21688 21312 21616 21545 21468 21660 21467 21878 21243 21677 21417 21746 21421 21637 21816 21275 21791 21280 21812 21495 21704 21616 21646 21664 21417 21692 21568 21545 21692 20845 21678 21377 21834 21509 21732 21688 20975 21564 21520 21584 21620 21564 21816 21547 21783 21224 21773 21450 21777 21592 21671 21600 21488 21645 21568 21559 21589 21528 21851 21495 21754 21273 21865 21367 21694 21503 21719 21607 21541 21525 21586 21595 21649 21504 21781 21413 21905 21190 21912 21249 21980 21384 21768 12979 16193 17223 17681 18104 18279 18413 18642 18654 29175 22454 21834 21379 21783 21268 21911 21253 21762 21321 21844 21478 21653 21413 21089 21402 21696 4152 18109 19189 19732 19553 20060 19734 20277 20021 20423 24416 21929 21297 21707 21447 21562 21461 21778 21416 21765 21356 21850 21413 21690 21555 21813 21488 16816 19939 20486 20284 20821 20465 20843 20596 20897 20569 22556 21660 21781 21429 21726 21524 21845 21485 21659 21440 21880 21447 21632 21405 21741 21571 21660 19664 20904 20943 21098 20908 21063 20992 21332 20977 41433 21727 21980 21546 21610 21322 21751 21681 21632 21404 21515 21864 21819 21532 21527 21601 21931 21431 21000 21135 21740 21417 21299 21197 21527 21405 21357 23510 21746 21863 21620 21497 21467 21723 21816 21428 21496 21608 21878 21497 20995 21449 21661 21805 21513 21643 21571 21850 21453 21548 21580 21808 21465 21561 21634 21762 21435 21750 21660 21698 21483 21776 21738 21731 21568 21777 21524 21596 21600 21843 21267 21771 21612 21714 21305 21772 21593 21560 21515 21831 21564 21726 21555 21701 21393 21820 21497 21504 21560 21817 21257 21864 21683 21504 21448 21916 21747 21721 21594 21690 21429 21890 21463 21652 21484 21816 21293 21835 21494 21654 21464 21883 21298 21828 21555 21836 21552 21957 21388 21747 21569 22091 21488 21825 21530 21841 21532 21888 21433 21928 21222 21812 21472 21544 21468 21769 20953 21820 21431 21991 21529 21748 21258 21920 21494 21581 21506 21728 21333 21813 21336 21799 21415 21472 21408 21767 21423 21890 21378 21625 21461 21651 21448 21645 21332 21825 21533 21699 21541 21703 21492 21713 21389 21744 21387 21541 21527 21616 21447 21697 21424 21772 21450 21527 21515 21561 21433 21705 21183 21753 21479 21648 21562 21575 21440 21617 21346 21824 21438 21772 21544 21425 21584 21547 21649 21657 21376 21828 21386 21709 21515 21496 21606 21555 21675 21531 21326 21800 21461 21881 21549 21626 21780 21664 21917 21578 21595 21649 21336 21751 21584 21867 21453 21735 21569 21514 21671 21476 21860 21538 21696 21611 21337 21660 21824 21633 21671 21472 21814 21341 21856 21563 21825 21604 21671 21685 21550 21641 21569 21652 21586 21622 21686 21533 21844 21477 21808 21367 21820 21874 21809 21513 21720 21592 21644 21722 21572 21561 21460 21549 21723 21436 21902 21413 21872 21484 21825 21480 21769 21515 21702 21584 21466 21581 21833 21596 21776 21516 21779 21355 21840 21314 21888 21288 21849 21416 21860 21484 21767 21513 21721 21551 21633 21527 21622 21504 21767 21582 21771 21430 21792 21462 21881 21383 21904 21314 21907 21437 21907 21376 21866 21281 21776 21338 21676 21340 21676 21456 21914 21523 21626 21460 21640 21541 21772 21507 21600 21189 21698 21267 21856 21316 21765 21211 21809 21393 21743 21386 21677 21383 21705 21518 21764 21607 21716 21548 21760 21527 21766 21450 21783 21597 21782 21395 21741 21350 21788 21488 21835 21499 21589 21415 21647 21464 21719 21461 21860 21609 21689 21544 21618 21528 21746 21347 21536 21293 21671 21385 21717 21339 21880 21622 21819 21434 21909 21490 21833 21421 21803 21383 21794 21581 21713 21554 21817 21446 7633 15179 17180 17799 18235 18409 18435 18611 18743 18938 24064 21995 21349 21732 21472 4446 18826 19886 19769 20177 20108 20209 20265 19981 20369 24757 21827 21793 21603 21719 21565 19865 20416 20921 20592 20911 20768 21022 20953 20839 26704 21833 21824 21722 21563 21874 19616 21131 20960 21243 21100 21089 21205 21231 21254 21465 21776 21778 21605 21927 21632 19466 21244 21859 21386 21771 21043 21680 21346 21590 21392 21922 21616 21831 21565 21957 21429 21847 21591 21749 21581 21857 21609 21792 21385 21944 21497 21859 21568 21640 21499 21822 21415 21861 21481 21793 21647 21739 21369 21832 21579 21716 21353 21878 21579 21836 21381 21828 21480 21985 21350 21717 21491 21796 21408 21776 21312 21626 21526 21877 21425 21806 21472 21624 21500 21882 21517 21656 21331 21740 21450 21776 21459 21843 21371 21676 21348 21774 21553 21866 21460 21712 21349 21648 21432 21692 21622 21848 21540 21739 21541 21673 21564 21689 21528 21860 21549 21842 21526 21715 21469 21709 21532 21648 21444 21818 21576 21697 21469 21662 21303 21752 21478 21764 21527 21584 21382 21587 21586 21785 21472 21583 21351 21770 21720 
35488 41819 34772 33157 36672 37131 37929 34407 35927 42771 43042 41904 42103 33577 35589 35671 36793 33589 34336 42240 34886 42032 35968 37433 36116 32663 33253 41580 42721 34835 38096 35008 35257 37582 33848 33593 42488 36841 34126 36184 43077 33519 33112 35687 34753 35712 34167 32435 34125 35377 34865 33993 41391 34986 34580 36689 33472 42700 34037 36289 34293 33792 40832 36500 34745 35892 41592 35481 36056 37340 42263 34197 33958 37417 34113 38044 41948 37447 34846 36336 41350 36096 34210 36872 41516 35490 34603 36610 42128 37645 34274 36727 41128 37250 34368 36688 40784 36922 33642 36379 41467 37000 33077 33680 42769 37154 33664 33483 33072 37072 42818 35326 43298 41480 35366 39893 35553 40684 34309 41570 41985 42696 33156 42257 35296 39787 35336 41201 34554 41619 43206 42560 34743 41341 35680 39792 35433 41456 32835 41568 43265 41097 35027 38437 34848 40916 33716 41536 33885 40841 35714 38948 35622 41240 33745 41379 33568 40627 35264 38820 35877 40858 34227 42112 43057 41618 35250 39521 36276 41303 33856 41536 33624 41336 35875 38728 35232 41920 33176 42242 35957 37677 35681 41321 29187 36978 34144 38966 39904 30224 34808 34938 39049 41472 40547 42816 35307 41879 33468 42224 34701 42305 37908 41991 33610 40232 34208 41683 34980 39672 35328 41293 35285 40552 36326 41172 34958 40272 34286 40759 34236 41858 33266 41244 36081 41890 42956 42648 37064 40722 34772 41784 34677 41184 33390 41936 34669 40535 35080 41024 34272 42665 34583 41540 34980 40972 35803 40851 34484 42458 33442 41874 34565 42023 34587 42400 37951 42312 33799 40405 35676 39332 34356 33747 42373 42264 35127 42144 34160 42528 33057 34985 42093 42395 35387 34460 33100 42418 42087 34232 41164 42161 37121 41825 33768 33302 42313 35328 41618 42090 36009 40907 35214 40982 42711 43408 43079 36009 39527 35072 42008 42562 34407 42189 43177 41500 35718 40298 35772 32848 42549 35787 42457 35403 40169 35840 40203 36563 41946 34437 33681 33088 33048 42453 33408 35316 41560 35144 42488 43110 34273 32727 42120 35609 32710 34177 33941 41056 42112 36126 42817 43205 43520 36311 32870 33783 33472 35520 40925 41968 42759 35634 34292 35024 42280 42920 40922 35015 42389 37441 33536 34040 41584 33312 42061 36176 33328 36167 42531 34723 41437 33865 39386 33811 40744 24221 31525 33925 34080 40800 39776 34304 41304 36192 34981 34537 40776 35489 41719 36653 42736 36024 33091 35728 42162 34897 39949 34746 42208 36864 33408 36279 42051 34112 41153 36978 42774 36583 40883 34005 41472 35999 41641 35634 40187 35240 41649 35040 40264 34451 41922 36636 41135 35273 41179 35929 42305 34737 39762 35211 42099 35765 40943 34625 40687 35176 41296 36023 40424 35456 41312 35333 41800 35488 41520 36017 41665 35104 42657 35734 42368 36183 42027 34577 33296 33889 40760 33892 42474 34445 42656 43066 42311 35185 41984 42196 33093 35331 41824 42246 43177 36498 41285 35952 42968 34828 41954 43309 42112 36247 42068 36200 41191 34585 42499 34464 40435 36533 43127 32908 41493 35770 32976 42659 41424 35565 42059 33191 41186 36972 42976 43336 40865 35091 34112 42185 42713 35735 34453 42443 41344 34660 34931 33704 42656 42797 35520 33952 41344 41521 36657 33869 40644 42907 36640 33017 40224 43043 35815 43015 40963 43066 35648 32994 40422 42648 35427 33158 41121 41544 32983 35012 34549 42692 36638 33896 37442 41641 35865 34761 35342 43028 34680 42688 42896 33536 35108 33332 42104 35360 35877 33133 33938 34401 35778 42370 34925 40672 35094 35192 41120 39904 39605 41536 34215 39096 43069 37804 34176 41431 35622 42540 43382 43008 36232 40391 35634 42856 35301 33324 36338 42197 35499 33946 34519 42819 37770 33168 35718 34488 33860 33344 36742 42414 36835 34309 33001 33036 35651 41510 37368 37398 35766 33668 32856 32741 35340 41335 37147 40807 35922 42562 34080 42656 35176 41767 37266 39863 36405 41611 36418 32824 42468 43312 35328 42166 37440 40833 36616 40501 36168 32808 35172 42725 33316 32851 36298 33344 35417 42458 36566 41477 37198 41116 36941 40944 36774 41958 35649 41137 34391 41610 36024 41184 35493 33801 35319 40968 35689 41703 35488 39464 35904 42195 36082 40228 36040 42671 34508 39840 35116 41064 34003 41827 38149 42899 34519 32570 34485 41460 34964 42054 34337 41755 35202 40705 35787 41637 34252 41678 33488 41525 35415 41154 35336 40215 35794 42992 35754 40928 35926 42440 35203 40752 34727 33380 34165 41443 34870 32452 35316 39616 36017 39961 35818 34296 35408 42040 35648 40933 35239 40590 35435 40763 35323 41120 34695 41146 34550 41264 35450 40771 33829 41975 34828 32471 33312 32389 33896 33032 42598 34348 32993 34583 33000 33267 35910 33580 39855 33245 34448 36320 34656 36061 36269 36532 36739 37240 41110 34090 35599 32743 34343 41847 36106 41472 37608 42299 37479 41737 36958 41387 37968 41371 35255 41500 35266 42695 33257 42230 34560 34710 42314 36207 32974 36000 41528 35894 42902 43104 43039 43136 34425 42454 33676 36791 42847 34664 33643 33422 33558 32966 34618 34299 34327 33344 33793 34616 33280 33624 35373 42160 34368 41968 35259 41480 35294 41525 34484 33657 34275 34757 32680 36065 41309 36935 41328 36214 42390 35574 42400 36416 32896 32934 34137 34050 34049 35600 41698 36017 34303 33114 41912 37541 42325 33908 34049 36137 41460 35341 33574 35797 40632 36587 33621 42744 42427 36619 41842 34938 33088 35511 40467 37255 32599 33651 42409 37200 40248 36944 42655 34199 32439 35201 42496 37034 41656 35697 33627 33328 42488 36888 40440 36745 42368 35180 33204 34590 33067 35988 40345 36777 42296 35400 33393 33945 33137 35776 41624 37571 41399 36677 42112 36438 42475 33924 42624 43220 33521 36118 41688 38535 40870 36385 41456 36302 40404 36101 40352 34396 42388 34714 32909 34952 42249 36241 40108 35981 40354 36365 42330 36091 42552 35969 41612 35080 40376 34584 41645 34452 36500 40993 39984 41900 40163 42880 39447 42928 41208 35926 42167 36534 41642 37319 41211 34528 41850 33494 42418 34807 33190 33876 32417 34325 42732 35084 41400 35622 42197 34801 41928 36083 41856 36891 42152 35852 41366 35728 42104 34693 42848 33683 41493 33795 41976 33232 32604 34544 42456 35812 42649 34721 33444 34150 33996 35486 32945 33696 32512 33404 42408 34496 42832 34472 42937 35050 32940 34453 41217 34658 41591 34086 40554 34020 40960 34880 42191 34220 41511 35076 42224 34384 42152 33056 41254 33848 40592 33754 42528 35286 42528 33928 42762 33828 32530 34241 34264 32572 32690 32905 34029 42824 33040 42304 36243 32695 36256 42829 37605 42932 35338 40745 33265 40634 35549 42376 36347 41416 37206 40912 36334 40316 35737 42226 36556 32999 34983 42578 34402 34393 35136 35056 33676 33589 34307 35072 42264 34850 32472 34081 33033 34781 34136 32915 33709 34135 34944 32462 34337 34093 35072 42736 36215 43045 35417 33058 35735 40730 36906 41280 36352 40964 36457 40327 36792 41638 36008 41933 36864 42405 35881 34153 34347 33289 36169 33856 35040 33136 32376 34102 32745 33320 34258 33440 35900 42533 37408 41920 36960 42866 37415 40522 37104 41112 37531 41738 36668 32786 35749 33747 33814 33858 33307 33098 34631 33338 35564 33384 35785 41826 36666 41549 37457 40161 36467 40778 38312 42432 35840 42775 35055 33198 35286 42409 35022 42874 34738 40995 36113 42550 36304 42105 36852 41653 36683 33099 34163 40154 35227 41415 34337 42248 35335 42038 34610 40358 34720 41385 35177 41299 35712 41192 36657 41967 36070 41080 34753 41700 35964 33609 34996 33932 33041 41888 33421 41612 35375 41542 35840 41312 34548 41440 34090 42812 33712 33201 32545 41144 33336 41319 35339 40464 34932 41501 34964 41799 34675 33761 33965 33264 34361 33392 35516 42884 37452 41480 34664 41234 33904 35339 34617 34304 41967 42777 35084 42159 36387 42804 36998 41799 33640 33069 42583 36259 43048 34434 41992 42560 34728 42520 37188 41518 37051 41984 35257 32497 42816 35249 40753 34279 33204 42468 34954 42648 37444 40626 35203 42012 35908 42208 34640 36267 40647 36497 40400 36469 43042 35434 34016 34442 34432 41968 35359 33367 33165 34948 36227 34989 41376 36833 32839 35319 34891 37808 33659 32641 33428 34060 33468 36213 33418 35960 40070 36144 42386 36104 33824 34776 33752 42532 34856 33336 33449 33744 32852 36774 43056 36170 40520 37216 41768 35466 43192 35826 34191 33152 32870 33552 33911 34308 32431 35794 41968 37541 39832 37537 40176 38471 41669 35812 34573 38342 38307 33026 37456 39632 41160 33162 33168 43151 43490 36941 41607 36335 40360 37722 40336 35795 41056 36875 42769 34896 41937 38997 42016 35172 21511 37184 39093 34690 32563 38144 34759 40450 38052 42218 44044 38016 40809 35544 42432 33881 42420 36096 41945 36028 41488 37040 42065 35328 33400 36249 42673 33909 36972 31852 40402 35957 42433 36401 33228 36352 32967 33593 34540 35895 42183 35872 32913 36616 42960 35061 42019 37377 42534 34384 41920 36048 33622 34534 33737 36449 37330 38854 36848 38496 37424 41168 37691 41617 35940 38280 33425 34016 40968 36125 34849 34016 41792 33256 36781 36576 33161 32992 33783 37675 42395 37784 39403 35824 42048 41102 40205 33360 41878 41894 44492 36016 37077 34242 42869 43067 35879 36320 42093 43168 34383 37085 43029 37973 42503 35072 36340 32874 34349 33521 36691 42570 33676 33633 36010 42573 33869 34068 35511 42330 36092 34657 34945 42816 36011 35630 35511 33352 35696 32880 33814 33709 36608 40461 36123 34192 35101 40871 36071 33939 33312 32823 36512 33570 35472 33405 35042 41592 36725 43008 32902 33263 36311 40327 37092 34992 32486 42075 37772 35761 35424 33892 34949 42131 37331 42720 34769 42752 36616 40893 36934 42960 34894 42411 37620 40781 36668 33470 36493 33233 37876 41809 36029 33497 39265 42819 36704 33104 36480 33147 36802 42288 37837 40267 36464 42471 33565 42500 36096 37302 36542 42331 38708 33243 35559 40299 37540 42996 34200 32551 35152 41156 36612 41152 36512 42137 42806 42089 36146 42332 37336 41521 34617 42470 34820 42209 34848 41068 36624 33291 34980 33200 35133 42752 35539 41793 35795 41776 33536 33026 33888 42329 35304 41898 36104 42400 33467 32852 33368 42102 35490 39940 36027 42836 34613 33488 33617 41940 34435 41176 36517 42432 36128 33199 41881 33904 33309 34279 34528 41256 36663 41692 35626 32961 42656 34416 33345 34816 33134 41062 36347 42561 37504 33557 34224 35776 34486 37557 33778 33933 34304 41067 36138 33574 36996 42598 35991 33506 32712 34729 42545 37136 33152 34762 34188 41184 34896 36212 34201 34791 42373 36663 41448 36928 33680 36297 33975 34787 34912 33408 34261 33408 34311 33632 34184 34898 33180 36513 42741 36420 41734 36737 36952 36279 32872 35174 33768 34327 35347 33508 33398 42276 33758 35444 42240 37686 42080 37178 42860 36712 42689 36119 32983 35012 33548 42440 34179 36491 33990 35616 32866 35783 41543 36751 40896 37168 40653 37024 41993 37120 42871 36180 32873 35286 33536 34071 33036 34152 32426 35681 33841 35840 42160 36184 42544 37511 41796 37415 40928 37592 42465 37672 41418 37248 40561 35913 41257 35112 41255 35112 42222 37724 33082 34221 42313 34584 33176 35717 32740 33657 39655 35177 40393 36889 40918 35985 40128 36417 41680 36156 41668 35233 41671 35480 32998 35491 34169 35175 33304 35361 33104 35613 42352 36364 34086 35875 41753 36050 41425 36295 42672 37002 43137 34215 42023 34944 42416 35754 42532 37096 34208 34945 33147 34002 32867 35488 41336 33244 40722 35104 41616 35634 41378 37347 34358 36469 42258 37691 42854 36904 42266 36596 41750 36261 33888 35117 33280 36297 42346 29174 37418 37668 34478 38976 40979 30707 32416 34023 36390 39763 38722 41544 35732 42432 25383 34504 36431 35143 39436 38912 40013 40560 37663 41408 36944 36544 36025 34048 35400 33496 36201 41742 37143 33106 36816 34939 37938 37336 36141 36908 36660 36323 35453 33608 36902 33219 39040 37269 40583 39041 38744 40084 40679 40474 42862 35985 35816 34061 37640 34156 31447 40211 37072 41705 36183 38152 34835 41194 34118 41428 37709 34129 36580 33717 37888 42295 37153 34048 35700 33856 36688 34176 35826 41641 38024 43050 37234 33452 34160 42980 36892 42158 37235 42851 36330 34680 35685 41633 36739 33864 35158 41408 37404 33890 36533 41642 36693 42696 38544 41529 35616 42848 36361 41749 35968 40768 34587 32954 37025 42086 36647 42464 34560 42920 37512 33109 34365 41092 35911 42377 35988 42496 37006 41825 35104 41248 36181 33336 36877 42464 35408 41381 34545 42053 35364 34289 36619 33168 35606 33225 34681 33485 34914 32914 36696 33508 36480 33056 35200 42688 35680 33112 34148 42119 36696 33637 34893 42680 35079 40944 35969 42713 35941 33171 33460 41492 34081 33632 35905 42450 34304 41428 36040 35335 
22475 22381 22200 22581 22728 22788 22577 22535 22381 22327 22252 22307 22215 22567 22672 22706 22577 22585 22296 22351 22295 22387 22571 22794 22515 22346 22320 22583 22376 22739 22684 22491 22656 22443 22464 22226 22585 22343 22731 22313 22620 22302 22556 22487 22720 22366 22422 22391 22666 22523 22584 22214 22417 22386 22637 22336 22373 22272 22806 22407 22554 22144 22517 22336 22715 22237 22403 22367 22784 22352 22543 22208 22722 22378 22536 22097 22615 22348 22664 21680 22500 22304 22700 22169 22465 22261 22791 22180 22612 22337 22755 22183 22561 22199 22768 21915 22588 22208 22754 21980 22586 22372 22534 22096 22658 22381 22499 22183 22707 22247 22455 22172 22795 22280 22423 22187 22780 22130 22637 22108 22576 22067 22662 22121 22502 22071 22528 22153 22540 22197 22519 22063 22679 22212 22473 22053 22714 22116 22473 22100 22584 22016 22570 22052 22475 22201 22686 22110 22446 22421 22227 22565 22092 22675 22016 22637 22269 22598 22201 22567 22037 22647 21991 22624 22253 22443 22243 22542 22092 22699 22129 22564 22204 22333 22337 22688 22144 22656 22092 22914 22243 22615 22048 51 6987 11162 12345 13987 14037 14889 14526 15226 15159 36669 27895 25755 24661 24752 23900 24077 23600 24129 23301 23701 23089 23539 22860 23296 23046 23126 22770 23269 22740 23124 22666 22983 22727 23058 22567 23057 22528 23012 22687 22881 22592 23003 23018 22800 22616 22807 22469 22720 22508 22860 22459 22793 22607 22649 22421 22848 22715 22748 22441 22638 22507 22618 22428 22849 22297 22720 22432 22716 22393 22747 22316 22637 22304 22570 22567 22535 22471 22660 22196 22634 22464 22511 22456 22631 22288 22823 22224 22569 22618 22528 22445 22435 22372 22684 22303 22513 22684 22233 22474 22464 22301 22793 22134 22528 22631 22471 22543 22356 22353 22758 22228 22554 22325 22520 22408 22396 22622 22318 22630 22358 22696 22097 22596 22512 22480 22302 22460 22038 22611 22337 22661 22421 22574 22460 22534 22389 22548 22318 22684 22136 22619 22273 22471 22489 22513 22308 22672 22203 22592 22348 22391 22414 22659 22146 22613 22311 22546 22304 22712 22274 22408 22247 22674 22326 22464 22224 22549 22311 22639 22252 22539 22189 22631 22326 22666 22261 22594 21506 22458 22158 22620 22288 22702 22319 22736 22234 22395 22050 22441 22124 22609 9354 14632 15785 16776 16829 17562 17297 17916 17591 18350 27136 25188 24087 24269 23592 23873 23343 23674 23175 23394 22704 23088 22765 23272 22823 23189 22730 23117 22530 23036 22672 23204 22666 22973 22490 22972 22430 22826 22355 22872 22518 22936 22404 22881 22319 22863 22423 22741 21652 22733 22592 22741 22369 22567 22351 22715 22279 23215 22341 22851 22227 22533 22289 22825 22333 22645 22256 22810 22265 22538 22167 22807 22307 22551 22292 22680 22308 22610 22173 22695 22337 22521 22312 22748 22279 22562 22370 22621 22225 22633 22309 22636 22255 22585 22227 22650 22297 22544 22123 22688 22298 22480 22240 22624 22343 22405 22263 22570 22359 22532 22283 22520 22416 22536 22352 22632 22414 22448 22457 22481 22534 22422 22139 22468 22472 22464 22147 22384 22503 22556 22259 22192 22660 22537 22187 22244 22600 22566 22163 22458 22443 22552 22296 22378 22368 22610 22317 22272 22360 22636 22282 22215 22432 22583 22311 22183 22427 22631 22304 22329 22411 22663 22338 22523 22258 22473 22637 22268 22451 22349 22593 22176 22623 22301 22541 22103 22643 22403 22505 22137 22551 22352 22555 22172 22554 22310 22273 22259 22599 22301 22324 53 17128 17624 18488 18636 19024 18904 19485 19181 19567 27641 24778 23592 23681 23287 23335 22872 23305 22846 22968 22841 23079 22533 23044 22712 22749 22629 22998 22375 22913 22468 22631 22519 22757 22265 22900 22428 22587 22452 22681 22307 22870 22124 22744 22425 22508 22391 22738 22236 22814 22368 22792 22329 22569 22359 22712 22276 22852 22057 22811 22246 22699 22329 22514 22420 22632 22233 22789 22061 22717 22208 22680 22336 22501 22314 22641 22353 22633 22279 22728 22103 22720 22263 22744 22164 22713 22085 22554 22148 22531 22128 22595 22329 22528 22258 22583 22177 22534 22067 22596 22144 22656 22016 22605 22184 22460 22108 22456 22258 22465 22168 22519 22325 22551 22129 22684 22156 22535 22044 22563 21974 22507 21987 22600 21674 22668 22187 22599 22167 22598 22173 22640 22151 22584 22193 22503 22295 22422 22312 22498 22220 22452 22235 22571 22160 22546 22180 22555 22181 22516 22192 22493 22179 22456 22192 22426 22219 22433 22169 22464 22136 22496 22159 22516 22162 22455 22156 22584 22138 22599 22098 22515 22141 22532 22188 22518 22197 22528 22100 22611 22359 22506 22359 22556 22128 22535 22028 22443 22164 22453 22236 22333 17811 19383 19718 20087 20087 20237 20312 20295 20539 38570 24064 23106 23200 22809 23045 22784 22848 22551 22661 22391 22592 22519 22493 22423 22464 22592 22421 22643 22349 22770 22343 22764 22231 22686 22196 22600 22252 22487 22349 22448 22400 22312 22595 22284 22646 22173 22475 22034 22543 22178 22721 22219 22656 22280 22565 22365 22511 22363 22528 22386 22499 22348 22533 22322 22528 22375 22553 22260 22650 22151 22595 22128 22500 22265 22569 22261 22518 22377 22391 22337 22387 22275 22344 22353 22483 22236 22680 21979 22659 22250 22428 22336 22551 22024 22658 22274 22417 22176 22673 22125 22483 22166 22768 22261 22549 22265 22598 21965 22635 22301 22473 22200 22648 22636 22528 22263 22816 22159 22605 22194 22481 22308 21984 22177 22712 22172 22645 22252 22435 22196 22641 21972 22697 22097 22584 22249 23099 22115 22704 21917 22606 22099 22579 22240 22466 22304 22512 22120 22640 22126 22592 22124 22464 22208 22387 22273 22577 22093 22710 21967 22640 21867 22617 21992 22646 22038 22477 22104 22492 22209 22495 22085 22510 21969 22554 22341 22592 22100 22560 22075 22432 22043 22350 22037 22517 22216 22434 22205 22499 22108 22561 16889 21086 20873 21451 20912 21592 20981 21566 21083 21592 23280 22900 22352 22632 22388 22551 22429 22538 22207 22536 22226 22498 22168 22565 22197 22549 22072 22616 22231 22516 22183 22437 22158 22389 22227 22371 22201 22226 22280 22402 22355 22400 22222 22487 22277 22422 22298 22470 22132 22444 22046 22372 21973 22456 22280 22555 22248 22566 22005 22545 22283 22528 22165 22534 22221 22528 22173 22543 22166 22454 22173 22429 22171 22451 22086 22476 22172 22529 22201 22679 22093 22622 22133 22571 22085 22504 22107 22513 22103 22576 22104 22692 22194 22626 22071 22600 22196 22609 22121 22607 22144 22614 22123 22618 22332 22475 22097 22435 22201 22289 22140 22377 22128 22368 22320 22259 22408 22348 22477 22325 22465 22192 22487 22187 22507 22189 22562 22569 22478 22069 22549 22141 22502 22046 22519 22107 22609 22244 22550 22164 22455 22276 22492 22289 22361 22272 22891 22261 22432 22340 22625 22167 22376 22326 22226 22336 22444 22231 22383 22285 22343 22261 22484 22167 22496 22118 22622 22042 22640 22079 22592 21978 22663 21874 22651 22064 22668 22068 22652 22080 22647 22107 22596 22135 22892 22223 22396 22225 22371 22199 22464 22152 22528 22144 22599 22043 22645 22027 22607 21956 22656 22021 22619 22121 22468 22285 22475 22161 22285 22148 22488 22260 22361 22241 22432 22119 22567 21935 22537 22196 22540 22002 22536 22077 22522 22005 22482 22141 22421 22147 22344 22119 22352 22144 22330 22117 22512 22039 22660 22045 22496 21982 22489 22028 22523 22023 22438 22118 22433 22167 22454 22018 22336 22004 22352 22053 22479 22102 22560 22168 22487 22055 22416 22166 22348 22161 22365 22185 22275 22049 22413 22084 22530 21797 22393 22044 22363 22119 22325 22197 22306 22122 22256 22117 22423 21977 22360 21971 22268 22003 22401 22198 22259 22353 22277 22193 22317 22149 22537 22356 22384 22155 22396 22307 22252 22446 22180 22272 22204 22263 22544 22113 22578 22167 22376 22201 22262 22528 22240 22471 22392 22236 22164 22210 22477 22148 22618 22080 22298 22172 22184 22476 22265 22476 22089 22174 22322 22142 22518 22328 22360 22235 22322 22358 22134 22519 22007 22585 21985 22583 22097 22471 22262 22359 22282 22209 22236 22305 22336 22418 22200 22577 22049 22664 22011 22567 22127 22408 22194 22503 22263 22316 22233 22433 22120 22513 22327 22603 22007 22511 22029 22528 22185 22419 22267 22592 22225 22320 22176 22476 22094 22598 21904 22592 21963 22620 21993 22600 22144 22510 22088 22501 22186 22343 22237 22453 22135 22561 22022 22663 196 9075 11092 13737 13469 14512 14306 14930 14881 15168 32343 27650 25411 24957 24352 24347 23802 24073 23397 23913 23109 23631 22972 23438 22951 23354 22896 10263 14864 16799 17075 18212 17544 18130 18035 18306 18232 28438 25177 24856 24196 24288 23592 24017 23125 23849 23272 23479 23136 23459 22884 23378 22914 23170 16060 18468 18710 19456 19201 19685 19399 20050 19716 36240 25102 24571 23724 23769 23334 23693 23204 23362 23041 23356 23091 23177 22797 23089 22954 23099 22709 19259 19919 20591 20493 21176 20526 21045 20756 20909 26445 24074 23527 23340 23436 23045 23115 23112 22880 22779 22921 23014 22848 22772 22567 23047 22715 17573 21071 21575 21677 21650 21462 21593 21856 21719 21497 23714 23242 23067 22736 22712 22660 23072 22683 22584 22522 22915 22692 22631 22590 22640 22732 22583 22529 22520 22912 22509 22650 22499 22833 22447 22575 22573 22845 22533 22560 22648 22834 22596 22663 22633 22689 22348 22826 22557 22624 22382 22696 22341 22562 22513 22864 22338 22688 22511 22701 22364 22735 22436 22598 22439 22717 22224 22812 22347 22633 22307 22774 22233 22544 22391 22751 22103 22791 22419 22564 22388 22822 22063 22811 22368 22636 22290 22815 22183 22652 22326 22691 22169 22797 22256 22619 22352 22718 22112 22708 22355 22518 22374 22667 22100 22729 22290 22511 22275 22777 22090 22750 22173 22535 22189 22660 22043 22800 22208 22460 22292 22601 22140 22756 22167 22540 22341 22485 22287 22618 22055 22711 22113 22545 22227 22636 22059 22584 22085 22553 22171 22535 22287 22657 22106 22624 22124 22356 22232 22450 22296 22542 22272 22590 22216 22472 22255 22498 22345 22557 22337 22669 22243 22420 22277 22434 22190 22459 21693 22554 22171 22401 22261 22410 22220 22434 22091 22544 22190 22504 22315 22360 22431 22312 22265 22444 22063 22593 22178 22423 22336 22287 22487 22298 22304 22345 22120 22597 22096 22545 22237 22267 22518 22281 22449 22389 22130 22442 22044 22613 22200 22490 22291 22231 22311 22305 22554 22260 22494 22341 22258 22482 22255 22592 22288 22216 22499 22062 22504 22087 22563 22229 22532 22315 22404 22359 22493 22310 22391 22236 22473 22169 22535 22092 22487 22294 22592 22278 22567 22349 22406 22330 22312 22256 22554 22353 22528 22233 22621 22181 22612 22059 22570 21920 22580 22234 22663 22344 22481 22299 22317 22213 22905 22237 22561 22145 22711 22033 22669 21998 22622 22077 22607 22072 22501 22203 22546 22329 22392 22167 22609 22232 22584 22174 22607 22163 22634 22079 22668 22053 22630 21984 22583 22231 22555 22176 22628 22188 22543 22243 22497 22223 22418 22071 22339 22051 22519 22145 22471 22163 22533 22177 22545 21992 22438 21864 22536 22159 22584 22056 22493 22071 22506 22074 22469 22114 22556 22087 22385 22125 22425 22163 22441 22116 22457 22101 22454 22303 22574 22128 22597 22158 22522 22159 22399 22089 22287 22125 22384 22200 22497 22256 22383 22183 22383 22257 22400 22161 22398 22140 22516 22007 22375 21970 22472 22123 22563 22108 22567 22177 22497 22188 22352 22163 22264 22215 22215 22235 22200 22258 22295 22316 22230 22435 22439 22405 22229 22543 22163 5319 10159 12672 13446 14251 14360 14720 14836 15204 43618 29611 26412 25080 24624 24142 12071 16150 17262 17469 18224 17454 18502 18423 18423 18684 28586 25959 24704 24836 23940 11137 18295 19499 19609 19951 20039 19987 20192 20273 20142 27945 24864 24614 23905 24120 23715 19973 20673 20864 20921 21194 20913 21373 20871 21449 27311 24512 23763 23644 23481 23552 21006 22077 21600 22256 21839 22089 21905 22053 21832 22119 23319 23541 23055 23426 22969 23054 22881 23095 22837 23218 22616 23239 22463 23089 22768 22960 22652 23109 22553 23144 22598 23092 22669 22845 22625 23081 22338 22972 22661 23035 22311 22833 22557 22956 22539 22810 22451 23033 22423 22501 22348 23021 22425 22806 22400 22646 22310 22950 22449 22733 22409 22678 22414 22889 22345 22729 22308 22674 22359 22837 22343 22784 22390 22621 22070 22698 22425 22829 22365 22707 22291 22563 22437 22579 22437 22814 22474 22663 22389 22537 22377 22563 22402 22726 22451 22681 22382 22611 22341 22620 22522 22564 22311 22777 22428 22636 22371 22529 22736 22505 22391 22777 22393 22503 22248 22434 22371 22661 22440 22510 22433 22436 22654 22583 
23168 22333 22939 22341 23044 22537 23074 22535 23077 22372 22402 22140 22727 22273 22969 22437 22999 22356 23047 22448 22752 22325 23061 22320 23014 22267 22854 22252 22903 22336 22877 22346 22926 22231 22681 22282 23069 22406 23002 22033 22705 22254 23083 22188 22871 22133 22793 22285 22934 22146 22869 22144 23022 22357 22875 22221 22767 22338 22889 22185 22754 22151 23013 22332 22908 22759 22905 22493 22944 22267 22669 22393 22861 22307 22633 22214 23017 22359 22929 22182 22816 22272 22784 22289 22786 22401 22704 22212 22851 22539 22823 22434 22664 22519 22693 22184 23024 22455 22443 22186 23085 22460 22604 22375 23091 22276 22684 22612 22874 22341 22523 22711 22805 22264 22617 22867 22656 22557 22824 22554 22539 22224 23030 22359 22473 22631 22816 22600 22228 22856 22673 22727 22484 22937 22477 22701 22635 22822 22407 22743 22759 22789 22542 22855 22453 22483 22743 22729 22238 22788 22670 22759 22503 22937 22358 22692 22647 22855 22294 22874 22455 22619 22568 22873 22222 22841 22468 22656 22428 22941 22130 22857 22528 22831 22261 23053 22441 22775 22443 22838 22247 23064 22275 22800 22436 22913 80 83 2037 4476 5509 6557 7639 43669 43701 42185 35681 31795 29367 27729 26965 25619 25646 24753 24658 24208 24027 23668 23861 23313 23713 23350 23307 23249 23306 22999 23271 22856 23120 23029 22855 22834 23157 22531 23080 22695 22829 22823 23014 22560 23000 22406 23242 22631 22850 22496 22907 22443 22937 22615 22790 22601 22989 22395 23035 22357 22852 22456 22677 22417 23009 22230 23093 22406 22617 22471 22797 22259 22935 22258 22948 22447 22669 22281 22924 22020 23067 22343 22896 22369 22759 22273 23027 21978 23073 22208 22739 22431 22803 22295 22970 22064 22952 22304 22545 22391 22684 22303 22979 22120 22982 22127 22813 22251 22879 22125 22743 22074 22938 22039 22908 22054 22883 22280 22880 22119 22811 22124 22848 22142 22872 22128 22765 22110 22978 21928 22809 22074 22679 21999 22631 22093 22800 22141 22827 21911 22840 21968 22695 22256 22769 22064 22823 22006 22773 22316 22738 22072 22749 22159 22690 22281 22697 22209 22676 22288 22761 22151 22599 22296 22816 22100 22734 22077 22583 22314 22833 22233 22704 22182 22632 22060 22709 22140 22900 22228 22804 22136 22729 22102 22798 22099 22815 22216 22873 102 86 3573 7583 9655 11264 12005 13095 13728 43671 43704 39293 33189 30381 28073 26966 25709 25127 24443 24331 23609 23903 23657 23939 23241 23221 22921 23143 22926 23473 22975 23040 22567 22875 22743 23180 22675 22814 22719 22725 22996 22862 22449 22621 22448 23063 22699 22726 22579 22578 22817 22634 22735 22356 22772 22529 22868 22266 22722 22585 22784 22550 22454 22627 22702 22507 22507 22544 22784 22512 22456 22566 22924 22376 22468 22583 22928 22317 22676 22553 22871 22130 22664 22562 22961 22185 22567 22453 22732 22191 22611 22400 22976 22725 22682 22487 23021 22303 22656 22444 22917 22304 22532 22269 22914 22359 22648 22441 22986 22327 22651 22228 22961 22326 22605 22180 22964 22269 22663 22225 23055 22214 22676 22241 23021 22197 22856 22055 22955 22347 23159 22089 22891 22368 22808 21977 22868 22356 22902 22057 22899 22377 22951 22187 22764 22352 22954 22057 22916 22138 23040 22006 22857 22084 22669 21973 22848 22040 22785 21963 22902 22275 22723 22147 22956 22067 22708 22081 22728 22145 22696 22043 22958 22181 22833 22051 22949 22071 22424 22039 22857 21993 22620 22149 22917 22103 22713 22304 22759 22121 22831 118 2319 8249 12199 13467 15243 15651 16744 16525 17431 43697 36036 30362 28456 26359 25645 24591 24620 23137 24140 23369 23662 23072 23392 22830 23388 22817 23053 22469 23093 22519 22983 22515 22941 22456 22973 22340 22954 22449 22695 22467 22794 22336 22966 22343 22827 22427 22640 22528 22775 22188 22877 22325 22648 22344 22650 22589 22672 22229 22739 22132 22812 22402 22610 22464 23040 22611 22555 22386 22716 22158 22954 22295 22754 22342 22435 22416 22448 22663 22394 22458 22596 22248 22710 22144 22865 22245 22894 22182 22609 22369 22585 22585 22508 22736 22429 22493 22492 22321 22648 22231 22628 22729 22350 22663 22352 22819 22243 22799 22280 22716 22224 22752 22371 22768 22503 22622 22529 22677 22567 22397 22612 22506 22540 22462 22528 22457 22616 22893 22564 22513 22471 22732 22389 22668 22379 22784 22379 22685 22404 22864 22248 22867 22305 22799 22300 22797 22350 22801 22396 22627 22338 22899 22205 22773 22374 22780 22185 22880 22296 22796 22291 22754 22347 22756 22337 22779 22409 23223 22336 22830 22355 22755 22401 22675 22433 22572 22357 22643 22385 22585 22407 22567 22407 22632 22361 22780 22339 22720 22360 22836 22195 7308 12533 15784 16474 18278 17966 19188 18791 19696 41902 32979 27917 26764 24684 24957 23653 24197 23097 23789 22769 23676 22663 23479 22578 23345 22535 23189 22577 23032 22477 23287 22421 22885 22222 23051 22234 23008 22217 23047 22276 22988 22212 22983 22169 22920 22114 22935 22104 22859 22224 22810 22301 22878 22315 23074 22151 23062 22105 22951 22025 22935 22167 22736 22232 22807 22325 22703 22222 22707 22192 22772 22188 22849 22000 22931 22034 22868 22199 22849 22108 22877 22259 22661 22218 22877 22346 22627 22215 22787 22238 22750 22263 22745 22170 22784 22201 22493 22254 22817 22082 22744 22327 22822 22125 22793 22196 22651 22214 22823 22232 22689 22340 22702 22218 22806 22285 22638 22433 22695 21963 22881 22331 22503 22505 22585 22057 22786 22139 22611 22448 22555 22241 22667 22007 22808 22353 22331 22578 22670 22235 22608 22063 22857 22241 22417 22451 22536 22580 22576 22216 22795 22147 22853 22295 22497 22531 22712 22685 22514 22375 22572 22186 22752 22183 22871 22209 22714 22395 22446 22791 22403 22485 22599 22314 22528 22169 22622 22941 22482 22704 22265 22793 22281 22740 22161 22830 22377 22755 22502 22633 22533 11798 16729 18569 19525 20043 20468 20617 20770 21107 20864 29419 25740 24865 23657 23746 23079 23453 22849 23159 22887 22897 22873 22813 22697 22782 22660 22860 22599 22881 22486 23002 22416 22884 22435 22896 22313 23026 22153 22973 22343 22906 22320 22880 22391 22837 22386 22907 22321 22848 22404 22732 22512 22563 22528 22609 22456 22669 22369 22733 22433 22689 22368 22640 22372 22711 22282 22770 22281 23061 22288 22874 22265 23377 22313 22915 22282 22648 22308 22786 22330 22825 22348 23104 22304 22611 22368 22768 22279 22899 22421 22663 22331 22862 22272 22889 22192 22616 22227 22855 22125 22626 22200 22712 22153 22760 22188 22768 22137 22872 22233 22822 22185 22853 22125 22885 22137 22935 22099 22802 22071 22837 22146 22971 21780 22956 22074 22919 22094 22759 22125 22919 22050 22828 22272 22801 22219 22793 22381 22707 22259 22609 22276 22803 22371 22663 22224 22631 22214 22624 22215 22676 22214 22658 22121 22663 22183 22852 22235 22878 22198 22826 22096 22824 22103 22797 21943 22715 22176 22650 22042 22636 22133 22673 22221 22634 22259 22633 22422 22668 22384 22513 22405 22391 22424 22548 22329 22418 22284 22649 22292 22664 22182 22825 22305 22738 22099 22735 22158 22600 22390 22505 22573 22455 22676 22773 22696 22384 22438 22458 22421 22564 22359 22775 22297 22894 22232 22998 22199 22823 22182 22708 22272 22545 22349 22463 22567 22458 22736 22411 22592 22190 22599 22260 22721 22318 22673 22356 22624 22424 22699 22442 22411 22547 22461 22471 22564 22418 22691 22434 22624 22288 22741 22284 22791 22380 22806 22503 22711 22556 22568 22407 22609 22454 22792 22341 22750 22221 22870 22282 22764 22325 22715 22606 22535 22478 22605 22472 22875 22277 22888 22169 22891 22153 22973 22380 22737 22429 22625 22447 22689 22323 22981 22032 22981 22192 22977 22188 22775 22357 22637 22350 22722 22200 22985 22204 23009 21930 23056 22205 22825 22302 22753 22357 22663 22441 22755 22275 22924 22519 22934 21986 22979 22167 22980 22321 22617 22155 22731 22141 22907 21934 22841 22183 22926 22080 22711 22284 22759 22184 22839 22209 22761 22161 22840 22232 22929 21985 22772 22168 22908 22355 22819 22106 22567 22028 22779 22170 22887 21959 22823 22022 22832 22180 22765 22305 22716 22254 22732 22277 22624 22153 22809 22106 22822 21922 22718 22176 22781 22297 22709 22317 22639 22217 22683 22104 22642 22233 22790 22185 22767 22096 22804 22093 22728 22197 22589 22313 22639 22540 22528 22397 22467 22240 22665 22264 22875 22119 22820 22000 22685 84 87 79 179 3709 5455 7052 8073 8670 9170 43678 43693 40599 35015 31061 29564 27306 26936 25618 25454 24449 24616 23991 24109 23811 23752 23721 103 91 5073 9003 11012 12715 13331 14543 14643 43632 43658 40888 33337 30961 28588 27171 26221 25521 25117 24856 24199 24235 23881 23623 23613 23666 23098 100 7519 11757 13952 15944 16401 17260 17700 18408 43508 39524 32643 29755 27381 26256 25335 25322 24348 24205 23765 24182 23625 23717 23205 23829 23241 655 9111 14419 16323 18042 18075 19163 19123 20039 19495 38967 30989 28567 26231 25677 24392 24832 23865 24244 23177 23960 23232 23808 23040 23311 22992 23591 11863 16849 18539 20188 20072 20992 20505 21444 21028 21533 28970 26825 24784 24876 23392 24128 23271 23685 22871 23601 22919 23370 22705 23351 22758 23296 22647 23000 22668 23349 22342 23047 22587 23141 22336 23187 22400 22980 22272 23143 22301 22896 22178 23017 22269 22936 22503 23026 22340 22812 22483 22947 22424 22988 22465 22836 22295 23005 22393 22812 22409 22784 22290 22910 22357 22784 22293 23027 22387 22976 22455 22904 22329 22915 22330 22749 22198 22746 22255 22601 22582 22620 22218 22990 22478 22560 22619 22858 22229 22919 22561 22865 22536 22804 22723 22882 22405 22505 22297 22832 22272 22567 22572 22625 22353 22866 22230 22626 22551 22634 22476 23013 22519 22646 22663 22533 22405 22935 22355 22572 22608 22471 22377 22693 22753 22409 22795 22272 22685 22493 22437 22448 22839 22237 22770 22584 22510 22751 22764 22505 22854 22577 22675 22659 22373 22606 22785 22359 22865 22566 22702 22616 22577 22543 22944 22266 22859 22273 22789 22551 22553 22488 22833 22277 22861 22295 22866 22472 22602 22477 22900 22195 22945 22278 22928 22451 22640 22349 22278 22400 23017 22122 23035 22145 22827 22365 22784 22500 22876 22311 23073 22068 23015 21719 22912 22347 22836 22345 22622 22337 22961 22167 23012 22029 22847 22419 22816 22408 22767 22305 22830 22277 23053 22195 23112 22136 22853 22147 22996 22104 22969 22232 22754 22288 22988 22245 22825 22434 22769 22178 22947 22334 22889 21993 22951 22159 22805 22127 22692 22160 22746 22217 22915 22226 22796 21959 22791 22305 22894 22217 22991 22255 22857 22286 22703 22285 22967 22381 22737 22360 22776 22272 22629 22132 22850 21935 22864 22064 22726 22320 22939 22256 22623 22391 23162 22362 22720 22290 22757 22125 22720 22195 22836 22076 22795 22296 22873 22432 22665 22274 22379 22427 22536 22658 22570 22691 22648 22615 22514 22435 22592 22357 22647 22019 22798 22208 22889 22272 22973 22197 22852 22378 22589 22366 22543 22413 22465 22641 22451 22743 22515 22468 22413 22396 22872 22533 22483 22632 22528 22816 22432 22791 22302 22921 22320 22798 22401 22729 22544 22698 22490 22666 22475 22715 22664 22567 22606 22461 22545 22619 22422 22681 22429 22711 22265 22885 22244 22905 22327 22914 22343 22948 22172 22784 22293 22784 22315 22775 22397 22691 22528 22699 22451 22596 22488 22727 22432 22915 22405 22761 22295 22797 22263 22996 22272 22987 22231 22972 22064 23072 22075 23031 22008 23099 22081 22886 22087 22925 22246 92 175 78 2328 5708 6589 8372 8649 10096 43640 43690 43694 38081 32632 30597 109 2609 8209 11872 13046 14667 14860 16123 15838 43617 43697 42304 34880 31808 28804 129 6934 12892 14625 16987 17194 18558 18148 19096 18725 43680 36132 32072 28759 28056 4175 11882 15379 17966 18454 19481 19655 20342 20057 20729 39668 32540 28500 27403 25849 25660 16204 19278 19897 21124 20272 21740 21147 21687 21430 33368 28064 26533 24858 25109 24135 24389 23916 23851 23783 23778 23381 23682 23053 23662 23023 23397 23008 23370 23193 23216 22772 23476 22726 22903 23129 22984 22659 23408 22805 22893 22638 23262 22648 22697 22438 23191 22999 22985 22518 22941 22592 23247 22849 22869 22529 22708 22671 23161 22895 22963 22891 22441 22758 22691 23049 22767 22955 22429 22886 22663 22925 22823 23028 22695 22707 22479 22694 22704 22892 22740 22832 22584 22649 22445 22804 22618 22911 22590 22945 22516 23104 22304 22717 22590 22953 22603 22941 22696 22967 22406 22706 22305 22797 22372 22994 22566 23010 22405 22866 22273 22880 22509 23015 22420 22921 22224 23028 22465 23115 22366 22765 22354 23232 22528 
