# Supplementary material for: An Active Feature Selection Strategy for DWT in Artificial Taste
Source: Hindawi journal article supplement (doi:10.1155/2018/9709505), 2018-01-01
Supplement: f1 [file 9709505.f1.zip › redWine-hi-3.txt]

43469 43462 43464 43465 55 9325 17318 20480 21277 21932 22420 22896 22716 23355 22880 23708 23255 23555 23344 23799 23406 23815 23369 24082 23530 23768 23620 24045 23555 24120 23525 24174 23609 23980 23617 24285 23382 24281 23643 24120 23695 24201 23523 24283 23481 24246 23670 24077 23622 24352 23399 24265 23660 24024 23671 24348 23369 24391 23718 24048 23742 24305 23534 24327 23780 24057 23780 24355 23522 24297 23753 24096 23688 24270 23621 24251 23744 24169 23653 24354 23579 24091 23639 24347 23501 24244 23767 24121 23496 24246 23732 24110 23595 24268 23497 24176 23814 24109 23574 24168 23712 24583 23568 24304 23584 24299 23626 24174 23608 24183 23683 24116 23534 24186 23632 24112 23716 24360 23701 24096 23717 24165 23585 24055 23766 24186 23665 24245 23780 24157 23618 24159 23764 24123 23770 24261 23639 24024 23777 24240 23606 24081 23783 24064 23738 24183 23813 23975 23631 24119 23721 24469 23829 24164 23620 24093 23890 24080 23664 24098 23868 23922 23853 24119 23826 24117 23785 23847 24116 23913 23805 24049 23796 24235 23889 24230 23652 24120 23656 24026 23674 24107 23719 24135 2337 17981 19681 21029 21299 21527 21882 21638 21734 22211 32725 26509 24940 24901 24357 24293 24379 24163 24208 24585 24344 24251 24118 23997 24034 24168 23975 23928 23982 23783 24118 23831 24244 23793 24184 23823 24175 23808 24198 23794 24189 23888 24156 23865 24192 23859 24202 23960 24221 23908 24228 24000 24348 24033 24271 23952 24368 24097 24331 23913 24179 23748 24247 23669 24303 23674 24151 23718 24213 23768 24227 23938 24269 23853 24345 23818 24276 23826 24038 23705 24213 23868 24409 23950 24441 23760 24201 23648 24397 23836 24365 23728 24022 23638 24370 23831 24439 23712 24162 23651 24368 23836 24302 23529 24284 23744 24540 23671 24206 23717 24471 23783 24212 23562 24389 23803 24302 23537 24316 23872 24398 23589 24216 23825 24451 23681 24281 23840 24356 23511 24224 23800 24416 23577 24339 23844 24138 23726 24481 23569 24274 23559 24236 23520 24435 23568 24128 23737 24245 23633 24408 23652 24096 23712 24199 23777 24135 23636 24247 23652 24173 23823 24192 23671 24300 23576 24252 23622 24277 23661 24311 23552 24123 23756 23705 23671 24192 23751 24193 23661 24206 23597 24288 23402 24163 23723 24240 23680 24248 23689 24185 23762 19291 21420 22400 22208 22694 22487 23040 22578 23040 36847 26453 24320 24660 24048 24589 23901 24522 23936 24462 24039 24405 23792 24280 23745 24188 23823 24130 23908 24170 24033 24043 24101 24053 23936 23969 23959 24118 23843 24321 23855 24320 23797 24104 23808 24141 24014 24039 24149 23785 24055 23939 23846 24367 23554 24148 23849 23898 24206 23939 24149 23917 23780 24233 23862 24096 24012 23828 24269 23936 23964 24231 23926 23986 24066 23997 23991 23974 23713 24224 23879 23898 24115 23862 24221 23881 24123 23882 24180 23914 24301 23581 24336 23911 24080 23949 24185 23962 24308 23908 24137 23981 24043 24112 24302 23840 24046 23953 24198 23991 24378 23821 24137 23986 24196 23761 24414 23709 24256 23911 24209 23668 24296 23738 24087 23832 24309 23883 24486 23741 24176 23820 24358 23546 24436 23821 24096 23780 24380 23605 24211 23849 24201 23744 24410 23765 24249 23819 24330 23478 24397 23830 24242 23622 24424 23607 24160 23853 24398 23444 24356 23845 24168 23696 24370 23812 24074 23801 24373 23572 24329 23842 24361 23451 24512 23656 24266 23520 24342 23661 24128 23666 24330 23575 24215 23720 24216 23591 24234 23804 24077 23690 18453 21877 22960 22532 23392 22625 23318 22895 23434 22695 26327 24387 24629 23844 24370 23917 24224 23785 24437 23809 24138 23899 24342 23828 24109 23732 24321 23746 24106 23831 24189 23554 24194 23936 24096 23808 24200 23887 24094 23771 24139 23847 24087 23711 24153 23801 24144 23735 24215 23982 23943 23751 24064 24066 24071 23842 24086 24072 23913 23793 24089 24151 23985 23960 23961 24072 24200 23744 23912 24016 24272 23808 24001 24016 24198 23841 23991 23981 24240 23780 23950 23958 24358 23854 23984 23867 24216 24008 24214 23850 24168 24066 23765 24162 23910 24229 23624 24210 23977 24316 23651 24196 23938 24182 23917 24156 23941 24203 23885 24014 23880 24285 23912 24034 23760 24412 23936 24064 23759 24305 23904 24123 23754 24385 23726 24276 24096 24164 23821 24441 23680 24346 23925 24141 23749 24343 23909 24413 23543 24354 23621 24496 23649 24452 23527 24381 23681 24455 23495 24400 23575 24473 23680 24361 23676 24352 23712 24280 23771 24240 23860 24076 23801 24117 23822 24288 23861 24229 23830 24246 23751 24350 23670 24397 23680 24424 23648 24239 23638 24228 23607 24209 23607 24229 23492 24269 23604 24256 23667 24333 23605 24192 22100 23113 22989 23452 23159 23636 22963 23789 23075 27570 24230 24533 23979 24373 23808 24196 23831 24241 23761 24110 23834 24320 23872 24109 24165 24060 23865 24320 23786 24097 23703 24241 23840 23975 23788 24257 23873 24253 23883 24253 23940 24245 23864 24176 23968 24293 24012 24225 23944 24213 23993 24137 23991 24268 24171 24088 24073 24250 24135 24146 23928 23999 23838 23975 23660 23848 23733 24079 24035 24286 24008 24016 23803 24290 23773 24070 24264 24056 23895 23431 23832 24332 24140 24000 24215 23693 24221 23877 24268 23859 24175 23978 24320 23714 23974 23888 24288 23852 24000 24040 24314 23936 24021 23972 24276 23575 24181 23952 24196 23584 24285 23873 24156 23873 24374 23888 24068 23874 24223 23665 24389 23783 24183 23757 24182 23617 24473 23744 24167 23739 24197 23729 24534 23537 24235 23820 24245 23759 24420 23446 24388 23765 24183 23812 24045 23753 24484 23470 24343 23702 24217 23891 24058 23824 24240 23666 24509 23508 24404 23712 24288 23734 24220 23657 24266 23610 24224 23686 24307 23568 24288 23638 24269 23676 24352 23801 24177 23591 24092 23666 24047 23576 24128 23776 24144 23649 24197 23680 24154 23529 24263 22144 23640 23337 23761 23343 23814 23463 23893 23365 23937 24085 24284 23798 24218 23856 24192 23827 24226 23865 24093 23927 24028 23929 24156 23840 24000 23781 24081 23834 24006 23890 23975 23768 24199 23797 24219 23751 24139 23732 24075 23706 24072 23816 23937 24064 23767 23958 23785 23898 24096 23776 24245 23808 24113 23688 23957 23990 23785 24208 23881 24000 24034 23785 24350 23193 24139 23704 24035 24081 23877 24137 23702 23877 23940 24301 23853 24070 23876 24199 23942 24184 23616 24315 23743 24323 23879 24039 24113 24073 23800 24224 23717 24285 23892 23995 24018 24212 23850 24275 23548 24244 23880 24229 24007 24282 23685 24288 23584 24077 23909 24064 23912 24332 23577 24453 23581 24225 23730 24088 23828 24384 23639 24365 23813 24040 23886 24175 23672 24472 23639 24356 23831 24273 23634 24434 23532 24316 23783 24120 23723 24426 23453 24521 23751 24178 23841 24295 23594 24388 23657 24224 23808 24279 23726 24416 23612 24358 23743 24162 23522 24327 23494 24299 23637 24158 23617 24400 23642 24306 23800 24174 23575 24135 23651 24085 23562 24144 23500 24166 23556 24177 23568 24391 23710 24292 23770 24206 23588 24256 23524 24130 23755 24066 23639 24238 23720 24086 23688 24150 23665 24107 23804 24588 23736 24279 23786 24037 23842 23912 23636 24157 23734 23979 23811 24147 23759 24195 23742 24443 23772 24184 23492 24145 23908 24109 23838 24184 23628 24039 24009 24000 23899 24231 23702 24056 24107 23840 23829 24310 23722 23852 24192 24116 23819 23908 24109 23856 23892 24358 23613 23954 24220 23847 23786 24105 23990 23506 23910 24224 23819 23792 24248 23931 23840 24128 23880 23894 24099 23817 24261 23928 24329 23502 24269 23833 24103 23799 24256 23808 24100 23944 24080 23325 24261 23794 24006 24005 24333 23609 24176 23863 24233 23856 24295 23701 23972 23931 24221 23824 24257 23784 24108 23862 24391 23552 24282 23707 24200 23751 24418 23667 24456 23869 24269 23571 24405 23812 24268 23849 24305 23761 24455 23684 24133 23798 24384 23472 24500 23596 24359 23820 24324 23600 24392 23680 24297 23789 23983 23886 24397 24084 24350 23527 24476 23630 24360 23629 24193 23628 24222 23640 24192 23653 24284 23611 24400 23665 24056 23895 24093 23510 24199 23521 24140 23670 24273 23584 24353 23693 24192 23724 24204 23638 24336 23641 24025 23816 24072 23716 24297 23662 24064 23777 24055 23657 24060 23676 24080 23844 24039 23856 24097 23707 24234 23770 24031 23882 24117 23657 24164 23798 23956 23920 24036 23782 24183 23725 24164 23844 23829 14786 19616 20807 21799 21543 22021 21781 21955 22189 43431 29560 25641 24390 24781 24069 24316 24256 24001 24389 24188 24119 24164 24053 24468 23911 24331 24033 19121 22184 22441 22844 22740 23011 23044 22880 22879 38456 26172 24682 24407 24715 24169 24459 24121 24349 24064 24407 24009 24472 23952 24441 23756 24379 60 22250 22449 23353 22757 23541 22850 23660 22816 23608 28440 25303 24272 24753 23859 24569 23889 24595 23954 24509 23901 24473 23838 24489 23953 24378 23913 19165 22738 23356 23254 23601 23225 23748 23325 23816 23241 26052 23955 24778 23825 24643 23669 24666 23834 24465 23933 24160 23861 24213 23964 24288 23969 24313 22267 23865 23312 24185 23388 24132 23437 23897 23450 23787 24194 24413 23867 24435 23788 24436 23754 24252 23660 24281 23703 24132 23792 24458 23733 24198 23632 24370 23596 24266 23673 24336 23676 24261 23863 24041 23792 24170 23771 24213 23890 24192 23837 24066 23895 24188 23876 24157 23808 24242 23699 24150 23788 24178 23879 24101 23796 24194 23824 24173 23665 24064 23962 24189 23991 24204 23818 24152 23648 24140 24032 24064 23991 23989 23863 24284 23924 24080 24061 23872 24068 23952 23755 24343 23784 24022 24118 24275 23981 23958 23770 24305 23682 24075 24178 23708 24016 23975 23826 24139 23985 24042 24217 23863 24311 23776 24216 23816 24071 24002 24207 23727 24259 23979 23944 23978 24171 23914 24246 23916 24169 23927 24084 23840 24323 23613 24280 23872 24131 23941 24260 23848 24321 23827 24264 23856 24217 23728 24379 23636 24280 23793 24183 23767 24441 23589 24343 23825 24121 23815 24347 23604 24498 23643 24345 23756 24251 23710 24418 23528 24312 23837 24074 23863 24304 23591 24344 23862 24187 23768 24416 23604 24362 23706 24371 23753 24320 23760 24381 23671 24512 23790 24193 23693 24129 23736 24268 23599 24352 23480 24272 23633 24257 23593 24329 23761 24168 23825 24169 23668 24186 23748 24148 23736 23481 23824 24236 23664 24184 23783 24032 23819 24295 23643 24099 23777 24009 23772 24181 23676 24112 24027 24026 23896 24208 23895 24088 24033 24057 23818 24185 23694 24138 24214 23772 23880 24335 23783 23913 24128 23696 23851 24270 23776 23928 24182 23840 23851 24396 23680 23889 24163 23863 24043 23811 24029 23906 24336 23575 24384 23859 24024 23837 24304 23798 24083 24001 24175 23680 24320 23849 24184 23974 24305 23664 24436 23805 24076 23898 24232 23653 24308 23885 24047 23816 24301 23700 24215 23888 24260 23169 24412 23726 24117 23872 24375 23543 24470 23668 24153 23703 24480 23499 24400 23766 24157 23701 24439 23592 24260 23854 24352 23505 24517 23652 24250 23568 24420 23564 24205 23696 24207 23559 24246 23706 24064 23879 24266 23672 24284 23607 24260 23781 24129 23521 24439 23630 24202 23813 24087 23696 24163 23684 24201 23834 24115 23840 24159 23777 24209 23636 24088 23900 23985 23700 24164 23719 24192 23744 24006 23860 24041 23719 24246 23713 24077 24082 23816 23829 24073 23693 24065 24056 23961 23937 24057 23672 24141 23865 23929 24146 23928 23761 24258 23730 23912 24235 23711 23849 24193 23736 23909 24247 23680 24289 23892 24089 23875 58 17688 21007 21576 21733 21901 22370 21836 22405 22133 35768 27023 24945 24177 24701 23906 20125 22212 22820 22787 22925 22764 23281 22851 23378 39383 26901 24244 24926 24053 24759 19337 22872 22801 23431 23077 23575 23153 23636 23136 23656 25580 25176 24076 24823 23918 18344 22619 23512 23346 23834 23236 23984 23249 23752 23287 26352 24183 24718 23996 24471 23876 23721 23303 24000 23284 24105 23558 23989 23552 24055 25628 24581 23868 24412 23908 24393 23720 24449 23852 24288 23756 24394 23792 24032 23928 24333 23757 24106 23977 24239 23835 24410 23776 24047 23872 24189 23688 24259 23861 24128 23926 24100 23875 24140 24006 24322 23877 24121 24023 24053 24148 24048 23908 24097 23766 24203 23862 24280 23850 23998 23948 23853 24177 24057 24253 23959 24179 23962 23970 24069 23884 24148 23861 24190 24192 23936 24176 24007 24110 23987 24173 23938 24041 24066 23898 23936 24048 24073 24064 23962 24152 23920 24234 23792 24423 23556 24449 23620 24429 23566 24480 23752 24439 23778 24265 23860 24121 23888 24177 23866 24229 23726 24386 23644 24411 23753 24281 23821 24218 23812 24279 23692 24428 23580 
21339 21522 21248 21553 21303 21427 21429 21253 21319 21205 21255 21186 21325 21112 21365 21083 21321 21048 21322 21437 21274 21489 21303 21337 21310 21475 21251 21463 21355 21385 21351 21297 21300 21408 21454 21280 21343 20930 20640 20925 20526 21096 20396 20898 20824 21015 20804 21098 20662 21028 20855 21488 20948 21109 20708 21131 20776 20920 20993 21023 20835 21399 20809 20913 20981 20972 20775 21197 20853 21008 20918 21074 20761 21144 21054 20873 20945 21264 20943 21098 21284 20855 20890 21237 20786 20903 21148 21173 20185 21219 21177 20856 20870 21273 20847 21078 21390 20801 21480 20960 21358 20668 21531 20962 21312 20945 21415 20915 21034 21003 21290 20888 21319 21073 21283 20775 21402 21024 21273 20971 21485 21015 21116 20951 21390 20795 21137 20999 21409 20679 21371 20897 21390 20615 21398 20986 21200 20272 21568 20954 21293 20951 21580 20880 21400 20913 21545 20641 21438 20976 21517 20685 21572 20979 21383 20540 21637 20727 21415 21027 21548 20666 21712 20902 21330 20884 21558 20603 21627 20643 21680 20770 21925 20807 21461 20877 21308 20931 21304 20964 21415 20981 21405 21024 119 6838 12998 14756 16899 16256 17538 16935 17824 17433 36681 24491 22996 21721 22253 21068 21773 20873 21737 21003 21664 20816 21510 20802 21491 20914 21369 20742 21379 20857 21513 21045 21504 20776 21544 20829 21528 20673 21617 20768 21561 20813 21512 20827 21640 20829 21510 20762 21564 20920 21638 20902 21451 20845 21414 20828 21425 20865 21303 20812 21371 20859 21093 20830 21249 20882 21376 20949 21331 20947 21548 21012 21328 20881 21398 20913 21223 21069 21361 20892 21340 20992 21405 20891 21368 20842 21152 20916 21495 20983 21346 20840 21302 20861 21330 21085 21273 20663 21110 21043 21415 21121 21125 20844 21357 21199 21284 21280 21071 21275 21312 21078 21110 21000 21451 21002 21144 20952 21511 21178 21155 21054 21329 21203 21043 20937 21436 21257 21080 20920 21401 21166 21075 20963 21500 21115 21143 21354 21242 20873 21345 21111 21227 21031 21472 20977 21131 21346 21181 20987 21477 21034 20800 21160 21033 21211 21139 21450 21068 21525 20921 21511 21056 21394 21169 21255 21169 21206 21092 21424 20983 21526 20942 21432 20920 21416 21039 21422 21162 21308 21196 21201 21079 21407 21058 21257 21036 21407 21007 21395 21082 63 11369 17033 17443 18522 18375 18973 18711 19264 18977 42064 23918 22636 21577 21623 21233 21584 21189 21552 21124 21461 21169 21544 21132 21488 21078 21646 20923 21669 20835 21824 20901 21636 20807 21814 20771 21682 20987 21560 20968 21408 20945 21463 20981 21609 20940 21764 20816 21753 20717 21703 20890 21583 20962 21409 21078 21458 21004 21653 20887 21703 20821 21616 20938 21459 21036 21664 20983 21728 20760 21760 20838 21548 20765 21591 20852 21473 20955 21459 20904 21406 20801 21531 20746 21536 20985 21505 20752 21665 20635 21633 20772 21516 20825 21484 20701 21626 20713 21512 20861 21505 20744 21607 20835 21420 21033 21490 20875 21591 20881 21388 21016 21259 20899 21398 20827 21435 21080 21351 21063 21560 20820 21424 21137 21325 20840 21448 20843 21281 21017 21421 20919 21425 20836 21345 21006 21554 20958 21413 20919 21344 21062 21569 20855 21275 21202 21174 21039 21457 21076 21223 21125 21411 21105 21218 21360 21047 20976 21459 21102 21171 21121 21459 21001 21332 21388 21217 20877 21378 21248 21210 21142 21588 21034 21117 21176 21361 21159 21316 21470 21102 21031 21437 21165 21104 21263 21299 21356 21217 21489 21013 21592 11877 18179 18509 19643 19375 19685 19601 20176 19767 19944 23856 22197 21397 21655 21287 21656 21086 21511 21212 21524 20998 21573 21202 21513 21048 21788 21116 21488 20269 21655 21201 21306 21133 21685 20952 21470 21018 21673 20929 21392 21047 21688 20973 21603 21015 21687 20941 21462 21062 21716 20948 21406 20999 21738 20981 21474 20997 21736 20849 21479 20883 21850 20886 21483 20864 21696 21036 21432 20901 21745 20982 21491 20898 21675 21072 21462 20906 21845 20921 21578 20825 21781 20923 21607 20649 21579 20952 21556 20803 21495 20872 21575 20889 21481 21008 21640 20764 21456 20852 21487 20992 21540 20767 21629 20962 21429 20770 21525 20957 21507 20771 21479 20861 21575 20936 21494 20992 21629 20848 21425 20964 21504 20854 21402 21073 21218 20969 21479 20884 21505 21028 21360 21025 21529 20925 21497 20910 21410 20899 21456 20997 21354 21121 21268 21086 21238 21073 21496 21000 21358 20955 21379 20981 21538 21095 21528 21071 21582 21031 21363 20963 21351 21099 21213 21174 21192 21291 20993 21371 21154 21553 21168 21418 21107 21476 21109 21475 21153 21344 21180 21097 21219 21128 21354 21117 21319 21304 21080 20941 21102 21612 2422 19368 19372 20445 20136 20455 20255 20404 20418 20515 24935 22208 21263 21549 21384 21608 20980 21797 21317 21748 20935 21687 21116 21804 21065 21670 20967 21421 21164 21676 21155 21525 20984 21484 20852 21491 20901 21649 21107 21639 20936 21686 21093 21750 21049 21612 20925 21623 20976 21719 20920 21627 20847 21706 20986 21654 20878 21744 20992 21723 21024 21694 21056 21747 21059 21568 20781 21336 20903 21664 21035 21803 21020 21795 20922 21579 20909 21666 20779 21533 21091 21542 20879 21476 20846 20864 20888 21508 20872 21543 20796 21593 20720 21555 21004 21670 21065 21594 21017 21520 20850 21527 20589 21482 20977 21440 20890 21571 20955 21479 21090 21560 20962 21281 21108 21430 20987 21495 21080 21299 21140 21365 21290 21505 21088 21414 20962 21460 21460 21539 21089 21408 21133 21429 20855 21514 21128 21196 21303 21381 20975 21447 21121 21377 21260 21232 21398 21214 21044 21367 20992 21555 21050 21245 21329 21181 21459 21175 21043 21425 20935 21554 21042 21288 21248 21069 21525 21081 21380 21216 21047 21432 20970 21217 21647 21072 21630 21025 21653 20911 21616 21001 21564 20920 21538 21147 21457 21203 21376 21287 21291 21318 19671 20629 20855 20743 21004 20767 20903 20817 21048 32417 21957 21263 21472 21290 21514 21173 21578 21088 21689 21155 21617 20944 21810 20809 21679 20806 21831 20893 21727 20851 21767 20983 21735 21171 21646 20941 21505 21027 21539 21072 21620 20972 21737 21142 21820 20644 21843 20885 21750 21035 21588 21016 21396 21118 21427 20983 21713 21057 21760 20790 21825 20928 21784 20964 21670 20843 21653 20780 21708 20820 21530 20813 21465 20944 21675 20955 21437 20955 21660 20823 21648 20790 21645 20966 21621 20932 21645 20935 21732 20839 21534 20841 21478 20956 21536 20987 21586 20755 21487 21100 21421 20952 21381 21072 21533 20951 21504 21056 21340 21028 21453 20947 21587 20810 21513 21018 21479 21003 21480 21041 21403 20975 21429 21095 21338 21117 21478 20933 21285 21277 21300 21160 21462 20942 21291 21285 20819 21210 21341 21132 21366 21149 21211 21428 21252 21082 21568 21108 21259 21527 21139 21120 21536 21003 21303 21459 21049 21218 21335 21093 21390 21124 21209 21384 21200 21098 21652 21225 21163 21316 21141 21575 21229 21541 21079 21627 21024 21627 21092 21586 21067 21529 21216 21287 21248 21490 20929 21544 21154 21292 21151 21655 20972 21429 21204 21497 21068 21624 21024 21447 21235 21588 20924 21646 21213 21317 21040 21621 20828 21504 21127 21545 20947 21729 21040 21516 21167 21665 20800 21740 21144 21381 21081 21615 20819 21683 21097 21498 20971 21751 20813 21742 20983 21473 20900 21836 20705 21673 20983 21628 21014 21755 21030 21573 21088 21744 20861 21628 21073 21571 20942 21803 20890 21511 20871 21696 20877 21641 20930 21625 20775 21559 20872 21180 20845 21624 20836 21504 21060 21425 20891 21639 20955 21568 20789 21675 20877 21579 21029 21652 20768 21592 20766 21541 21041 21549 20908 21446 21015 21552 20982 21509 21124 21447 21012 21418 20937 21593 20932 21347 21053 21351 20933 21462 21160 21560 21121 21587 21061 21484 21080 21316 20951 21514 20845 21403 21161 21180 21086 21521 20946 21349 21248 21302 21105 21525 20998 21314 21371 21207 21167 21612 20947 21281 21407 20738 21213 21216 21057 21695 20985 21358 21105 21170 21513 21200 21485 21118 21617 21159 21475 21257 21225 21287 21120 21425 21692 21020 21493 21173 21460 21166 21685 20833 21676 21163 21392 21267 21409 21045 21461 21225 21383 21249 21548 20961 21612 21101 21444 21239 21607 20849 21612 21155 21526 21095 21443 21044 21740 21168 21658 21114 21664 20893 21808 20871 21767 21099 21392 21006 21672 20906 21740 21064 21565 21062 21552 21019 21766 20796 551 12176 15943 16526 17472 17002 18088 17256 18424 43399 30208 23051 21873 21329 21749 21102 21815 21043 21899 21019 21692 21024 21543 20896 21616 21008 59 12165 18324 18106 19165 18565 19549 18892 19739 19250 43357 23849 22343 21239 21673 20951 21851 21154 21718 21019 21584 21074 21675 20965 21632 21061 21564 53 18051 18976 19773 19531 20087 19721 20300 19831 20393 27117 22598 21454 21768 21256 21588 21168 21555 21258 21601 21184 21548 21127 21668 21107 21606 21211 14963 19380 20231 20233 20613 20270 20688 20407 20850 20422 23533 21529 21712 21177 21524 21414 21338 21657 21430 21550 21233 21280 21283 21207 21546 21107 21676 19445 20885 20600 20883 20947 20776 21087 20936 21018 32584 21784 21587 21302 21574 21588 21266 21458 21329 21515 21197 21598 21056 21730 20912 21718 21091 21588 21148 21536 21254 21324 21289 21489 21239 21576 20904 21751 21035 21615 21194 21531 21207 21655 21112 21532 20994 21829 21031 21480 21168 21544 21137 21675 21312 21794 20972 21676 21054 21473 21165 21492 21002 21767 20817 21782 20954 21686 21021 21545 21083 21832 20810 21842 20923 21707 21029 21497 21100 21755 20759 21782 21036 21610 21113 21491 21113 21734 20784 21812 20977 22224 20852 21568 20885 21805 20749 21658 21041 21593 20877 21616 20968 21548 20725 21582 20980 21466 20921 21684 20405 21621 20775 21566 20840 21660 20755 21703 20821 21469 21017 21423 20927 21611 21175 21399 21076 21422 21006 21516 20993 21542 20980 21494 21127 21481 21009 21549 21049 21463 21007 21659 21053 21527 21039 21506 21029 21296 21242 21293 21142 21577 20992 21371 21352 21218 21205 21399 21102 21447 21192 21205 21344 21437 21040 21504 21145 21226 21287 21308 21174 21621 21173 21280 21522 21184 21082 21589 20997 21197 21433 20967 21724 21158 21448 21145 21526 21072 21735 21209 21276 21319 21559 21060 21552 21261 21336 21253 21593 21054 21644 21129 21528 21183 21671 20847 21767 21155 21425 21125 21680 20853 21657 21116 21446 21143 21645 20837 21732 21089 21440 21057 21715 20745 21733 21041 21464 21034 21811 20694 21856 20975 21572 21024 21720 20846 21670 21095 21505 21015 21728 20790 21765 21041 21525 20935 21907 20792 21650 20887 21519 20916 21583 20992 21632 20941 21497 20857 21656 20943 21412 20941 21687 20841 21585 20955 21511 20949 21614 20837 21431 21050 21492 20946 21511 20961 21510 21084 21448 20906 21556 21063 21405 21032 21504 20961 21493 21128 21592 21116 21624 20983 21443 21253 21355 21200 21587 21024 21401 21296 21341 21172 21497 21317 21201 21269 21489 20897 21312 21440 21080 21191 21625 20998 21237 21476 21215 21050 21378 21256 21113 21285 21427 21237 21459 21280 21085 21647 21009 21603 21169 21497 21158 21652 21100 21525 21300 21259 21165 21579 20977 21673 21112 21349 21258 21564 21162 21765 21018 21427 21300 21462 21120 21570 20951 21730 21049 21521 21121 21638 20665 21827 20893 21673 21081 21515 21002 21773 20769 21735 21040 21526 20987 21801 20716 21800 20992 21471 21150 21588 20905 21795 21063 21627 21083 21600 20798 21719 20768 21655 20899 21610 20852 21704 20846 21437 21145 21489 20915 59 9259 15493 16409 17679 17049 18216 17537 18248 17993 42258 24952 22241 21228 21740 21161 14008 17814 18918 18985 19664 19175 19720 19256 19816 43351 24729 21626 21760 21297 21504 14571 18996 19602 20096 20015 20250 20219 20133 20274 43273 23523 22073 21698 21594 21429 14503 19524 20553 20407 20481 20748 20743 20764 20718 20804 23585 21684 21927 21693 21382 10211 20707 20828 20896 20895 20808 21392 20780 21088 20717 23632 21774 21707 21293 21671 21377 21640 21322 21675 21223 21545 21320 21783 21252 21627 21252 21732 20992 21632 21245 21525 21159 21697 20917 21731 21190 21440 21189 21642 20936 21777 21088 21656 21205 21452 21093 21656 20935 21911 20837 21920 20873 21757 21064 21528 21132 21767 21121 21720 20936 21832 20819 21717 20844 21780 20834 21815 20853 21725 20896 21719 20870 21685 20832 21567 20978 21517 20903 21569 20843 21687 20808 21655 20856 21600 20994 21623 20864 21618 21040 21643 20877 21561 21178 21597 20946 21519 20992 21441 21050 21472 21148 21467 21116 21588 21058 21452 21132 21634 21165 21541 20916 21489 21072 21388 21413 21309 21255 21152 21221 21538 20565 21456 21114 
21521 21892 21361 21867 21259 21896 21447 21924 21431 21943 21416 21944 21404 21851 21504 21799 21559 21698 21581 21845 21440 21786 21456 21905 21334 21783 21435 21799 21523 21664 21373 21813 21507 21783 21488 21873 21548 21846 21507 21732 21455 21815 21592 21923 21591 21879 21500 21861 21533 21921 21494 21863 20837 21929 21663 21732 21303 21862 21420 21701 21477 21516 21570 21733 21812 21596 21810 21471 21878 21862 21686 21528 21552 21545 21534 21099 21649 21472 21558 21259 21760 21318 21583 21217 21730 21206 21703 21400 21411 21235 21682 21409 21565 21309 21712 21429 21542 21503 21507 21315 21744 21281 21440 21179 21802 21319 21648 21380 21676 21172 21576 21368 21509 21269 21780 21301 21625 21307 21831 21304 21626 21313 21667 20712 21639 21479 21671 21342 21600 21460 21472 21356 21697 21434 21668 21351 21720 21191 21582 21410 21760 21427 21539 21469 21610 21365 21616 21435 21485 21366 21687 21344 21586 21401 21683 21227 21632 21552 21506 21360 21756 21481 21507 21576 21568 21369 21868 21238 21600 21629 21523 21609 21454 21440 21401 21479 21696 21474 21717 21354 21735 21351 21700 21355 8390 14290 16308 17399 17716 18130 18387 18026 18777 43320 23768 21520 21892 21721 21493 21226 21425 21603 21792 21680 21722 21478 21469 21319 21717 21364 21365 21277 21287 21504 21393 21634 21457 21632 21411 21688 21474 21660 21399 21648 21498 21620 21504 21639 21632 21550 21549 21737 21607 21651 21625 21720 21641 21703 21649 21686 21618 21816 21549 21687 21445 21593 21281 21512 21241 21556 21377 21643 21497 21648 21563 21760 21575 21715 21490 21666 21348 21640 21249 21652 21504 21864 21592 21868 21513 21578 21297 21752 21474 21835 21520 21830 21156 21745 21549 21847 21452 21632 21360 21834 21507 21835 21782 21600 21426 21806 21519 21707 21352 21859 21541 21751 21200 21720 21507 21869 21366 21542 21547 21825 21449 21478 21426 21783 21403 21545 21542 21920 21403 21580 21411 21864 21360 21748 21484 21782 21203 21837 21409 21573 21432 21680 21324 21804 21389 21720 21285 21683 21354 21779 21476 21675 21428 21731 21601 21831 21457 21549 21352 21675 21492 21760 21240 21780 21355 21867 21354 21571 21428 22150 21499 21662 21436 21729 21298 21783 21569 21754 21314 21880 21462 21640 21468 21621 21495 21624 21414 21490 21552 21796 21377 6144 17172 18889 19117 19826 19428 19819 19571 19939 19817 24595 21543 21620 21408 21552 21409 21577 21414 21648 21451 21660 21543 21814 21432 21816 21357 21751 21418 21742 21269 21677 21400 21680 21516 21553 21639 21476 21703 21661 21589 21520 21456 21683 21444 21814 21262 21681 21353 21640 21477 21488 21829 21653 21550 21660 21369 21926 21616 21717 21529 21489 21862 21677 21514 21703 21462 21895 21403 21506 21733 21734 21578 21720 21364 21785 21479 21541 21836 21417 21480 21868 21592 21728 21363 21477 21778 21408 21836 21589 21481 21657 21754 21459 21824 21661 21893 21591 21591 21587 21730 21441 21615 21709 21559 21583 21838 21408 21722 21719 21616 21504 21803 21312 21741 21617 21537 21510 21789 21325 21739 21573 21652 21495 21888 21414 21677 21588 21640 21495 21808 21467 21096 21677 21735 21478 21817 21600 21635 21619 21867 21318 21682 21578 21716 21424 21924 21400 21865 21553 21864 21280 21921 21523 21680 21408 21904 21463 21592 21607 21742 21298 21885 21562 21614 21431 21913 21440 21623 21543 21860 21331 21737 21557 21786 21334 21896 21505 21652 21366 21707 21519 21723 21441 21835 21315 21764 21455 21785 21354 21782 21517 21792 18400 20040 20096 20337 20198 20707 20229 20608 20426 30448 21676 21800 21436 21732 21373 21635 21543 21614 21504 21721 21515 21033 21392 21780 21494 21649 21456 21840 21364 21680 21542 21785 21649 21811 21588 21698 21536 21677 21504 21666 21495 21678 21574 21700 21468 21696 21517 21667 21457 21724 21734 21648 21193 21658 21752 21751 21448 21632 21654 21589 21543 21655 21718 21738 21568 21579 21640 21913 21287 21515 21512 21876 21479 21527 21533 21815 21309 21553 21494 21847 21337 21464 21564 21875 21574 21430 21484 21846 21645 21590 21409 21676 21459 21419 21729 21685 21828 21395 21615 21697 21765 21372 21851 21667 21782 21599 21448 21701 21800 21624 21469 21601 21732 21645 21592 21594 21847 21644 21655 21433 21915 21548 21593 21546 21751 21520 21616 21576 21744 21505 21741 21447 21868 21504 21800 21613 21646 21632 21827 21417 21880 21437 21856 21492 21824 21421 21941 21472 21852 21527 21661 21624 21594 21576 21691 21511 21670 21550 21789 21632 21751 21542 21829 21472 21866 21325 21937 21252 21902 21299 21911 21220 21909 21423 21906 21344 21785 21416 21875 21294 21943 21303 21966 21400 21821 21437 21663 21596 21664 21558 21713 17561 20851 20664 21082 20669 21195 20824 21248 20971 21056 22187 21780 21389 21835 21339 21657 21577 21703 21496 21900 21560 21840 21459 21744 21477 21842 21382 21761 21575 21712 21443 21632 21574 21657 21482 21681 21543 21782 21614 21912 21710 21765 21557 21888 21753 21807 21678 21904 21704 21911 21632 21893 21706 21901 21783 21819 21740 21867 21818 21760 21642 21673 21512 21531 21356 21572 21412 21563 21623 21911 21680 21693 21542 21523 21447 21539 21888 21859 21594 21489 21504 21773 21873 21575 21711 21452 21644 21584 21859 21559 21584 21576 21872 21550 21684 21590 21824 21728 21708 21595 21835 21624 21661 21568 21744 21493 21509 21578 21824 21473 21664 21571 21736 21363 21800 21636 21561 21699 21858 21272 21762 21662 21633 21588 21847 21335 21797 21695 21730 21649 21905 21209 21880 21561 21617 21576 21765 21428 21960 21396 21816 21581 21704 21489 21953 21207 21916 21352 21787 21640 21716 21552 21824 21381 21852 21513 21893 21553 21652 21569 21610 21557 21872 21527 21805 21271 21756 21633 21968 21394 21719 21384 21611 21577 21903 21588 21702 21565 21799 21524 21752 21322 21763 21363 21661 21508 21819 21411 21800 21396 21957 21365 21349 21244 21581 21360 21448 21296 21564 21287 21591 23399 21927 21453 21863 21442 21817 21418 21912 21428 21799 21425 21707 21440 21762 21395 21797 21402 21755 21452 21739 21594 21570 21688 21528 21592 21528 21557 21487 21544 21720 21387 21881 21345 21861 21353 21672 21516 21505 21772 21504 21780 21600 21588 21643 21443 21817 21371 21728 21376 21635 21605 21518 21875 21517 21581 21625 21413 21937 21387 21883 21432 21600 21710 21412 21874 21190 21861 21413 21765 21644 21800 21735 21622 21554 21907 21259 21804 21623 21655 21638 21551 21740 21808 21648 21833 21591 21719 21617 21486 21646 21863 21696 21939 21489 21666 21580 21547 21587 21859 21485 21920 21597 21952 21581 21606 21493 21832 21376 21865 21614 21805 21655 21807 21209 21900 21480 21806 21568 21712 21451 21844 21295 21829 21563 21580 21522 21866 21312 21912 21531 21760 21553 21912 21390 21863 21456 21693 21572 21778 21431 21920 21399 21819 21667 21646 21504 21901 21267 21889 21531 21784 21478 21974 21507 21800 21513 21665 21399 21880 21333 21777 21540 21607 21395 21765 21335 21740 21536 21721 21431 21873 21463 21801 21455 21861 21378 21773 21474 21796 21463 21884 21308 21776 21590 21656 21525 21860 21452 21809 21572 21658 21474 21752 21511 21660 21513 21737 21729 21735 21572 21874 21490 21821 21483 21641 21583 21699 21414 21789 21387 21700 21615 21782 21447 21795 21558 21570 21550 21767 21469 21655 21672 21692 21597 21760 21414 21645 21722 21739 21547 21937 21532 21516 21801 21617 21426 21689 21644 21622 21490 21967 21305 21584 21799 21480 21443 21808 21737 21488 21611 21814 21411 21543 21858 21451 21522 21746 21496 21600 21830 21497 22264 21637 21829 21446 21801 21641 21504 21683 21760 21397 21773 21729 21593 21536 21843 21634 21687 21682 21762 21431 21848 21574 21506 21541 21873 21543 21736 21596 21618 21824 21993 21652 21593 21597 21798 21431 21900 21623 21623 21489 21841 21469 21816 21582 21702 21457 21920 21460 21840 21543 21733 21408 21943 21429 21792 21603 21801 21364 21986 21449 21767 21579 21664 21572 21871 21309 21946 21543 21485 21571 21720 21633 21895 21365 21925 21254 21904 21546 21847 21545 21882 21431 21875 21481 21580 21497 21665 21521 21754 21392 21794 21408 21669 21463 21892 21465 21868 21404 21671 21447 21892 21428 21759 21472 21781 21600 21687 21464 21841 21465 21762 21544 21750 21493 21760 21529 21724 21575 21710 21398 21817 21424 21625 21536 21692 21392 21767 21420 21760 21575 21627 21617 21642 21398 21904 21517 21600 21735 21674 21496 13928 16320 17866 18045 18245 18599 18636 18876 19017 28860 23032 21302 21497 21459 20949 21724 21680 21444 21760 21474 21904 21464 21589 21563 21443 21809 4757 18363 19588 19744 19980 19728 20244 20048 20268 20337 24554 21888 21447 21826 21391 21844 21361 21783 21576 21701 21743 21729 21547 21799 21536 21802 21579 16855 20214 20695 20596 20755 20809 20939 20757 21003 20839 22657 21659 21768 21548 21840 21588 21997 21586 21888 21218 21883 21511 21919 21365 21915 21307 21926 19889 21249 20921 21274 21100 21320 21164 21463 21062 41350 21949 21760 21574 21842 21512 21889 21492 21923 21356 21904 21409 21921 21533 21814 21550 21670 21584 21236 21376 21609 21152 21682 21009 21556 21191 21673 23594 21931 21641 21815 21625 21730 21483 21754 21401 21893 21448 21888 21508 21957 21475 21702 21609 21825 21432 21728 21495 21852 21433 21952 21479 21853 21536 21638 21683 21736 21578 21737 21546 21813 21463 21720 21581 21645 21611 21628 21545 21792 21436 21821 21398 21802 21510 21701 21676 21641 21524 21836 21463 21713 21569 21656 21728 21580 21597 21776 21397 21740 21513 21621 21761 21689 21617 21767 21464 21870 21473 21539 21992 21592 21520 21904 21508 21706 21581 21597 21868 21528 21552 21868 21490 21692 21619 21634 21804 21568 21741 21553 21668 21585 21724 21652 21870 21341 21861 21637 21536 21771 21795 21401 21932 21613 21956 21746 21655 21618 21764 21504 21773 21728 21543 21744 21777 21335 21924 21497 21752 21667 21651 21579 21861 21378 21862 21607 21560 21623 21818 21329 21917 21536 21595 21669 21820 21544 21888 21515 21769 21589 21824 21449 21923 21315 21923 21629 21656 21590 21954 21361 21965 21568 21545 21630 21827 21312 21968 21429 21876 21367 21838 21434 21771 21530 21740 21413 21864 21430 21789 21447 21703 21581 21719 21440 21787 21415 21842 21446 21784 21334 21877 21457 21703 21486 21736 21497 21714 21472 21765 21573 21701 21440 21824 21565 21728 21465 21725 21488 21816 21595 21709 21461 21815 21417 21737 21562 21735 21619 21817 21520 21762 21584 21582 21588 21785 21552 21774 21644 21684 21584 21751 21456 21783 21739 21448 21499 21868 21511 21671 21803 21833 21603 22040 21646 21660 21783 21447 21560 21865 21364 21596 22023 21729 21856 21606 21836 21707 21755 21288 21931 21729 21578 21539 21817 21600 21745 21608 21725 21640 21772 21561 21719 21693 21744 21493 21912 21536 21772 21661 21836 21415 21765 21675 21607 21621 21869 21353 21831 21634 21737 21481 21923 21465 21764 21623 21896 21336 22009 21506 21613 21519 21993 21352 21937 21563 21644 21543 21945 21401 21833 21606 21792 21458 22025 21491 21786 21373 21943 21355 21784 21589 21649 21504 21842 21424 21739 21536 21792 21501 21853 21586 21700 21519 21876 21401 21893 21504 21761 21485 21665 21568 21748 21560 21856 21366 21651 21620 21547 21509 21815 21381 21743 21582 21760 21440 21780 21472 21872 21453 21698 21601 21485 21525 21858 21448 21796 21763 21650 21609 21664 21426 21824 21568 21647 21879 21589 21405 21932 21417 21573 21837 21570 21605 21867 21616 21701 21809 21513 21550 21897 21851 21591 21504 21552 21885 21624 21104 9003 15960 17325 18693 18669 18551 18963 19094 18837 19385 24201 21952 21367 21511 21463 4579 19089 20079 19985 20267 20291 20292 20376 20372 20469 25048 21720 21724 21440 21848 21474 20082 20432 21019 20533 21152 20599 21239 20659 21258 26315 22077 21568 21932 21489 21799 19926 21056 21067 21505 20921 21533 21207 21264 21154 21492 21815 21835 21568 21868 21454 19682 21152 21650 21239 21647 21415 21643 21265 21486 21404 22132 21527 21666 21648 21744 21476 21729 21533 21813 21490 21740 21569 21806 21412 21805 21526 21413 21585 21827 21472 21685 21542 21764 21512 21778 21516 21837 21543 21289 21556 21745 21581 21961 21504 21581 21632 21785 21704 21696 21480 21849 21468 21888 21577 21740 21489 21640 21826 21609 21829 21527 21591 21607 21359 21712 21360 21927 21418 21903 21416 21945 21463 21633 21881 21524 21850 21441 21824 21430 21877 21500 21760 21564 21843 21671 21765 21671 21658 21651 21753 21728 21712 21691 21543 21675 21735 21596 21792 21605 21876 21456 21920 21251 21980 21331 21931 21432 21873 21627 21740 21624 21604 21587 21939 21465 21948 21280 21939 21496 21873 21593 21624 21594 21814 
32882 36964 41504 37377 40588 37355 42537 37796 42393 38231 42059 38048 42000 37197 32596 36141 33593 34897 33824 36661 42107 36294 42294 37549 41301 36312 42389 36567 33029 34354 41712 36628 32807 35912 42628 37324 33428 36616 32800 35303 42591 36788 33872 37464 34088 37184 43072 37271 33320 37344 42973 37383 36192 37689 34957 35413 40948 37191 42145 35458 42690 33260 33370 35456 36241 33985 36129 42848 37461 36978 35041 32929 33051 33141 33098 35776 33849 36480 41676 38135 42176 36461 42337 36520 33649 34653 36684 34083 34417 42344 36899 41984 37888 33347 36018 33829 35637 34845 34896 35475 33729 36611 35530 34848 36617 35840 37732 42930 37697 33944 37163 33882 33088 40314 36041 40856 34592 40960 36871 40840 34596 40792 34952 34585 34384 42736 35185 41400 34066 42312 42797 41840 35290 42210 34935 41466 35563 39858 34073 41735 35745 42127 33520 42610 34448 41517 34308 42267 43273 41968 35376 41114 33952 41760 35209 40276 34278 33132 32475 41151 36122 42785 33106 33461 33236 41497 37292 40417 34037 34432 32901 33997 42423 42417 42171 43177 35238 42530 35671 41448 35927 41514 35296 41539 26285 37804 39676 40300 33527 37731 40624 37096 34565 41345 37144 32821 36944 35497 42873 40518 42280 34352 35831 34721 35364 42674 43088 41476 35588 41488 41874 40960 41000 32804 41473 34454 42292 34370 41861 35208 42515 34973 41857 34583 42873 34528 32448 34281 33979 33357 33317 35512 34166 34432 34278 35236 34353 35195 34362 34906 34087 36240 33469 34980 42272 34249 40424 32996 40261 33573 41317 34775 42884 34628 33575 35392 33721 35227 42697 34935 41232 34513 40036 34636 32453 36740 33846 36948 32903 33578 40573 35948 42560 37009 32818 36360 39290 35797 33455 36746 42454 34396 41248 36829 32800 36563 35884 33810 41911 36633 33175 35191 41293 37152 33308 35788 39680 35492 32729 37010 41648 33520 33293 36290 42392 43060 42408 36371 41987 33600 33120 37224 42023 34048 41856 37163 41392 35928 42797 36269 39936 36934 41890 33959 42024 35008 41052 36485 41828 35588 40628 35168 41410 36164 42624 35250 42040 35823 33899 36560 42411 33778 41237 35177 42753 35792 40289 36044 41588 37351 41527 33876 41974 40151 43314 35123 42241 35721 40680 36297 33490 35729 40840 37321 42601 34592 42552 34615 42955 34575 41924 43080 33572 35922 41448 22601 36800 35764 38292 35748 41287 36032 32967 36900 35756 34646 33288 34048 41633 33477 41719 33975 41892 34562 42426 34953 33320 36244 42143 36592 41648 36167 42055 36064 40467 35188 41696 34984 32848 33155 34311 42496 35589 34725 33817 32626 42080 35217 42191 36645 40577 35051 41413 34541 42640 42998 36868 34568 33408 34520 41579 37852 34122 35280 33058 42587 37248 35014 32832 35106 42482 37607 42048 32960 35447 35511 33685 35204 41444 36267 42843 33586 36538 42072 42992 37360 33850 35209 41521 43015 36132 41735 36896 33908 42664 34934 35804 42447 36583 34800 37111 34033 33892 33714 35319 42132 34711 35308 33555 33851 36649 41745 35712 35466 34016 32408 36173 40745 36034 34153 32999 32631 36017 41203 36000 33651 34337 42920 37255 42060 35265 33725 34176 42908 36422 42716 39128 35132 35655 42677 36741 33865 34198 34169 37040 41048 35066 33664 35144 41863 37769 41824 37240 33388 36787 40424 37671 33079 34592 41638 37408 42724 34176 34114 35696 40696 37585 33616 34176 42200 37744 42163 34737 33297 36720 41196 35872 33478 35905 41206 37380 32724 34287 41485 35591 33116 35395 42147 36983 41016 35873 42649 36310 41472 36209 33033 35749 40472 38152 38499 41233 40052 34741 39854 33280 41912 46906 35394 36089 42284 35749 41797 34581 33297 34135 32433 35248 32925 38007 41640 36103 42916 34736 42208 36768 41524 34980 33203 35880 34372 36267 33771 34880 32916 34823 32471 34429 42952 35296 33624 34920 42554 35203 32980 34568 42293 35760 35573 34268 39759 34795 35702 35879 42266 34380 34487 33783 33251 34534 35308 35584 33351 33681 34193 37376 40839 33203 32611 36885 42865 33464 33136 36352 41081 33568 42788 37166 41325 42740 33924 37029 33703 42088 43137 37068 34610 33778 41728 35125 42451 42496 35735 34972 36390 41773 34696 34949 35708 41659 37136 34788 35913 34192 42184 35449 36096 34248 42640 34245 35392 34513 33742 33810 36763 34473 34599 42154 37856 33440 33806 33180 35779 32736 33879 33479 35410 32606 35629 42413 37333 32608 35930 34288 34459 33991 36417 42057 37377 42464 36992 42853 36599 42241 38101 42566 37144 33208 34640 34179 33829 33481 35032 32858 34627 33381 36055 34078 35815 33235 36402 42464 37292 41282 37911 40229 37592 40885 37752 40128 37603 42378 37552 41232 36264 41949 37397 40928 38158 41072 38416 41860 36851 42448 35184 33925 34392 33393 35098 31636 35939 33942 38502 34338 39840 35884 39976 37736 38170 40642 36060 41804 36970 41432 34890 33660 35160 42800 37569 33511 36380 42508 35834 42716 36872 41640 35854 33767 34997 42240 34374 33543 34484 42680 35140 33324 35828 34288 37275 35426 35713 33463 36828 35894 36471 35003 37100 35155 37480 34148 37113 35267 37379 36141 36544 35712 37099 36484 35513 34372 34743 32676 33024 41336 33794 41777 33922 34320 37445 34797 35155 33207 32826 42253 33513 36841 36955 33984 42634 32882 35813 37008 33810 35383 42400 34752 33543 36805 33624 33495 33456 36790 33495 34740 33799 36192 35318 35200 33993 36620 34274 34675 33308 35386 42865 33160 33555 36169 42569 34821 33547 35427 41512 36357 34247 33451 34992 36754 40432 35800 34758 34151 33656 36756 41330 36407 35329 35399 34372 37193 40067 37296 33600 34039 33493 35638 42048 38197 41803 36582 33895 34999 42694 38135 40172 37703 41443 36372 34300 35188 33163 36153 41607 37100 32912 37071 33368 34317 33412 34019 33368 36807 33176 36235 40564 36100 34160 37850 41728 35758 41525 34525 33641 37389 33833 35033 33651 36167 32930 35595 41028 35949 41558 35034 32605 36388 41969 36373 41716 38233 41715 41680 40711 34101 41239 42545 40919 33819 40661 34210 43047 38024 42661 37376 42259 36713 42084 37632 42168 36552 42088 35609 42059 35869 41760 36424 41872 36231 42440 36036 33937 33376 34816 32924 33672 32859 33316 42858 33556 35200 41728 37472 41314 37195 41525 34973 32849 32465 35676 32496 35692 33776 33649 34375 42201 36704 41808 35589 41319 34553 34017 32900 36985 33069 33722 34233 41905 37922 41878 37589 42220 34116 35280 41834 37273 39821 37131 42053 36024 34440 36024 35684 34295 33221 37254 40493 36468 34439 34592 34257 33491 35552 36113 34260 36520 34003 35381 34125 42807 34873 37025 34916 37740 42842 34946 33696 33300 33689 36816 42955 37668 34176 37623 33945 33989 42790 36795 41376 37253 34358 36285 34680 36426 40057 37487 42742 36673 33425 34992 42439 36928 41016 36772 33689 33632 32740 36852 40773 37582 33292 35360 33282 37248 41840 37328 42337 35490 33513 35692 42279 37623 41994 36832 34760 34489 32451 37242 40472 37267 33280 35769 42700 38488 32881 35964 32860 34458 41824 37369 41280 36056 33144 34056 41664 36005 41306 35917 32984 35280 42262 37296 42712 36512 42693 37248 41516 36205 42572 36329 42668 37552 41033 35944 33874 34407 32950 36701 42459 36518 33576 34481 42470 36032 32923 34497 32785 35484 35366 35656 33520 36871 42806 36890 42929 34728 33923 35009 41936 36433 41797 35301 34392 35877 42424 36417 33500 33364 33322 35728 42720 34992 34666 35009 34048 35392 41984 34837 35379 35682 33408 37554 33210 32744 36073 34140 41930 35335 34415 34216 42649 38600 41074 33860 36187 42652 42650 36422 35661 42608 34581 36305 41988 33658 36704 42528 33216 35512 42818 34148 36464 42983 41505 34608 36490 42348 36516 34423 32448 34770 35431 41766 36230 35444 33904 32860 36572 34208 34994 34776 35543 42272 36984 33698 32521 33063 36883 33396 35401 33932 34048 36125 38449 34560 33864 33969 36070 42293 37587 34502 34351 42663 36906 42785 36627 33892 35059 42313 37635 42504 36780 33411 35459 41689 38192 42306 36192 34059 36137 41484 38483 42524 36164 33831 34392 33455 37153 41104 38103 33478 42822 33946 35227 34146 37237 41664 37872 40356 37358 33350 36747 33308 37097 42368 37416 42849 34091 42859 34951 32825 35692 41520 36257 41748 35036 42601 37391 42648 37344 41971 35180 42404 37386 42160 36393 42484 36285 33833 34996 42410 36891 42640 35897 33188 35659 42881 35797 33092 35309 33739 35251 41749 36689 41975 34656 32920 34933 41472 36105 42102 35761 33768 34352 34080 34296 41719 37408 33106 33671 35591 34796 42592 35031 39557 35260 37179 39104 32752 32825 35480 37072 39720 39312 41013 43233 42897 37614 35559 34699 42144 35764 42547 37444 42560 34199 33572 42146 36514 28440 40011 33102 34481 37256 34470 39936 38167 40513 41347 45655 37380 42519 36695 41954 36913 41499 36328 33608 35056 35812 35430 33378 36160 32981 36074 33816 34281 39926 34692 33152 34797 35549 37136 35015 37698 36152 34835 34666 35634 33325 36377 33766 38496 33804 36853 40057 37517 32982 37607 41677 37843 41100 37847 36445 40132 37067 40563 39045 41096 39729 42835 38656 40649 38219 35596 33626 36496 32768 36918 42826 37888 41576 37415 41920 37744 33349 36256 33472 34656 33538 40110 41536 34420 39062 34977 37608 33447 39739 35003 34868 37722 34486 36421 34389 35335 42845 36150 41873 37467 42375 37232 32744 37841 42768 35473 34122 36308 42145 35604 43012 37153 42310 38011 42923 37274 33052 34192 34863 35448 33688 35528 33281 36251 42666 35629 33844 34438 34183 34313 33217 35769 42257 36872 41856 36481 32837 35014 34820 34330 32832 36487 42656 35530 33488 34343 35264 33696 33976 35600 41783 35940 32864 34148 35525 35008 34116 35764 42446 37440 42652 33540 38231 33920 32665 36992 32729 35052 33819 33973 36956 33024 33064 36896 42809 35397 34248 34097 36173 33385 35674 33300 34520 33628 35361 34404 37081 41472 37208 34400 32898 35760 36119 41860 37975 34400 37749 35714 34664 34082 35553 32494 35798 35301 33344 35408 35791 41335 37748 43060 36073 34732 34459 33732 36853 41479 37218 34257 33335 34288 36352 41078 37857 33078 33920 34658 36411 33184 36820 33012 35669 33857 36189 42373 37864 41067 37810 34608 34425 33790 37734 41516 38441 33516 33192 34377 36435 40787 38144 42318 37332 41780 37009 42284 36192 33106 35526 41964 37172 42256 36460 42470 35584 33856 35376 42034 36396 42135 36880 42381 36186 41225 37399 42457 35584 42900 35840 42961 35540 42433 36039 33664 35040 42023 36548 33724 35207 42544 35876 42640 36624 34083 35268 42496 36776 42103 35915 33536 35573 34249 36352 32778 35445 33581 33724 33644 35904 33195 35840 34424 34791 33547 35786 42249 36357 35768 42256 43434 37376 33010 34732 36256 36594 34083 38592 34646 34592 36021 42456 33751 36907 41556 34240 38592 35525 36688 34112 36560 35349 35932 40598 37984 35527 33684 33077 36306 33831 35538 33997 35488 34250 35765 33513 35367 35162 35497 42868 37670 33072 35698 34752 36583 42140 36036 34944 34152 34189 37078 41495 36919 34224 35555 42741 37872 42689 35945 34421 37082 41208 38886 32792 34154 33027 38298 41449 37924 33752 34326 33261 37752 41938 36877 34128 35829 42355 38871 43040 36337 41824 38199 41685 36168 33892 34305 32435 36435 41945 36020 32992 35761 43105 37273 33768 34935 33072 36889 41912 37468 32610 35449 42871 34935 33350 35545 33398 36578 41623 34787 34147 33329 32663 36329 41632 36156 33877 35386 42043 36122 42467 37197 42608 35320 33911 42810 33394 36680 42336 36337 35736 34381 34088 34400 41956 36552 33423 34531 37216 33923 41904 37968 42160 33952 36667 33511 33965 37013 34072 35064 36187 32882 33304 37133 36899 34028 32429 33015 37234 34304 38753 32821 35912 39273 33613 33389 32033 36253 37905 35228 41056 41728 37980 41818 33223 42496 26794 37345 38787 37423 40561 40838 40796 41651 41656 42890 40132 35511 35459 42034 36964 42446 38892 42080 38230 32602 38976 33579 40358 34169 40216 43755 39713 33552 37601 42842 36588 36908 38149 38612 32790 36736 33289 39936 40388 39446 43017 36781 36746 33428 36928 42570 34416 39072 34550 40386 34876 42048 34800 40249 43139 42257 40098 33369 34503 34219 35449 42566 35735 33243 36244 42757 35985 33519 36252 41888 36639 33067 41873 34012 36427 42477 35289 33223 35507 32714 35659 32904 36596 33396 40682 33596 35527 33841 37938 32640 33689 33971 35884 35097 34852 42587 37105 42708 37239 33792 35567 42736 34592 36345 34151 36468 33165 33844 34086 41608 35376 41317 37960 42148 37795 42036 38146 42772 34516 37163 32967 36673 42199 36573 42210 37448 43067 35825 33568 36616 34898 35704 34864 34576 34432 35780 35310 35066 35109 33328 34795 35636 33949 35817 34069 36975 42306 37642 40329 38483 41287 38019 42233 37300 34541 35602 34221 33886 33722 37685 42665 38220 40502 37988 42955 37325 34005 34155 33837 36281 
22676 22521 22749 22629 22701 22516 22649 22503 22702 22350 22904 22396 22702 22583 22737 22493 22656 22467 22727 22616 22677 22413 22771 22443 22730 22357 22679 22493 22678 22352 22706 22429 22624 22464 22652 22424 22661 22439 22650 22522 22496 22510 22854 22512 22825 22409 22611 22407 22623 22352 22664 22410 22579 22511 22636 22447 22656 22313 22797 22446 22846 22355 22844 22272 22864 22552 22594 22342 22540 22459 22521 22596 22512 22823 22397 22861 22572 22522 22386 22429 22496 22432 22679 22371 22880 22506 22726 22482 22623 22679 22553 22717 22399 22752 22589 22771 22252 22759 22362 22722 22536 22557 22501 22436 22602 22727 22578 22587 22468 22789 22169 22902 22165 22839 22257 22831 22380 22641 22510 22699 22449 22518 22538 22656 22406 22820 22279 22832 22200 22864 22200 22877 22277 22775 22288 22729 22403 22545 22372 22581 22517 22762 22274 22795 22428 22841 22125 22935 22300 22571 22377 22560 22247 22588 22327 22664 22361 22492 22435 22329 22352 22669 22133 22461 22547 22310 22320 22659 22366 22652 22228 22503 22448 22465 22533 22352 22565 22335 22640 22489 22551 22375 22605 57 7828 10881 12414 13764 14279 14974 14728 14951 15302 36684 27889 25735 25050 24506 24023 23981 23561 23864 23784 23525 23405 23337 23040 23170 22989 22996 22845 22692 23011 22868 23016 22869 23142 22779 22965 22750 23107 22752 22955 22713 23035 22703 22931 22791 22985 22745 22912 22797 22936 22708 22962 22801 22976 22651 22928 22737 22976 22653 22939 22511 22768 22385 22671 22400 22658 22461 22857 22483 22818 22488 22855 22580 22817 22595 22803 22516 22619 22329 22695 22548 22925 22488 23008 22548 22777 22272 22759 22520 22891 22509 22790 22318 22701 22459 22909 22514 22738 22316 22752 22505 22903 22361 22569 22311 22868 22509 22801 22220 22840 22455 22960 22722 22710 22336 22887 22340 22680 22298 22859 22468 22661 22255 22839 22445 22799 22345 22840 22501 22825 22312 22843 22471 22646 22373 22903 22209 22770 22289 22818 22241 22733 22163 22612 22455 22697 22239 22704 22231 22713 22417 22680 22219 22714 22298 22679 22432 22593 22324 22624 22141 22853 22231 22689 22193 22632 22386 22625 22285 22685 22209 22650 22308 22822 22196 22694 22336 22647 22192 22529 22359 22580 22420 22598 22394 22593 22448 22576 22327 22656 22332 22625 9639 14415 15607 16652 16694 17377 17260 17696 17637 17939 27459 25061 24276 24097 23611 23578 23364 23438 23101 23264 23061 23138 22990 22913 22941 22917 22823 22937 22791 23125 22633 23119 22578 23093 22560 22953 22521 22842 22608 22549 22833 22670 22792 22868 22589 22642 22732 22750 22577 23010 22492 22753 22597 22505 22930 22503 22545 22647 22407 22971 22215 22696 22635 22539 22686 22448 22449 22905 22425 22678 22534 22534 22753 22500 22457 22801 22661 22584 22727 22508 22546 22432 22836 22566 22607 22518 22802 22346 22823 22332 22742 22631 22584 22406 22816 22404 22617 22496 22534 22578 22710 22307 22792 22561 22444 22503 22745 22199 22762 22550 22417 22485 22735 22179 22891 22427 22543 22503 22683 22285 22668 22588 22489 22454 22764 22374 22692 22473 22570 22301 22892 22269 22773 22397 22707 21815 22849 22343 22779 22445 22837 22109 22759 22367 22584 22345 22800 22242 22704 22440 22804 22037 22844 22345 22604 22301 22890 22228 22678 22363 22740 22308 22820 22367 22557 22380 22760 22340 22512 22437 22789 22123 22713 22384 22720 22092 22804 22314 22658 22133 22732 22197 22652 22276 22732 22260 22560 22384 22535 22385 22647 59 17047 17499 18624 18379 19053 18757 19549 18869 19604 27301 24643 23502 23691 23094 23385 22829 23213 22855 23007 22687 22942 22676 23053 22537 23016 22524 22751 22599 22968 22384 22788 22530 22812 22337 22804 22480 22729 22572 22752 22530 22788 22378 22705 22501 22665 22636 22678 22597 22620 22599 22584 22633 22701 22528 22533 22574 22727 22478 22688 22606 22638 22390 22568 22605 22704 22353 22352 22528 22845 22349 22385 22470 22842 22352 22442 22490 22778 22384 22405 22521 22743 22441 22285 22395 22620 22559 22361 22372 22716 22628 22368 22740 22535 22766 22171 22602 22554 22772 22244 22650 22514 22685 22380 22605 22428 22741 22432 22503 22428 22764 22485 22542 22344 22770 22427 22696 22127 22775 22471 22609 22198 22683 22433 22546 22407 22757 22232 22642 22481 22482 22337 22817 22127 22775 22263 22747 22328 23123 22386 22542 22450 22497 22402 22566 22388 22528 22408 22441 22393 22669 22327 22765 22224 22797 22199 22865 22128 22796 22170 22766 22165 22774 22295 22843 22243 22752 22285 22644 22392 22649 22349 22629 22390 22600 22130 22729 22172 22641 22203 22543 22298 22420 22307 22573 22373 22616 22312 22602 22212 22653 22172 18322 19424 20274 19760 20563 19991 20689 20233 20675 38274 24105 22986 23149 22762 22899 22494 23032 22545 22764 22392 22839 22484 22743 22410 22406 22387 22720 22467 22752 22463 22601 22320 22585 22320 22605 22455 22784 22544 22698 22472 22699 22486 22772 22545 22707 22539 22768 22630 22755 22471 22812 22640 22766 22565 22813 22619 22746 22634 22609 22559 22658 22443 22459 22330 22433 22199 22390 22415 22778 22642 22497 22471 22436 22297 22311 22571 22762 22429 22417 22772 22376 22607 22663 22498 22457 22432 22343 22775 22501 22341 22232 22756 22443 22636 22254 22711 22516 22600 22251 22556 22471 22581 22289 22700 22493 23125 22336 22807 22416 22509 22433 22821 22295 22625 22394 22544 22286 22779 22384 22528 22361 22612 22180 22848 22374 22521 22281 22655 22167 22769 22297 22603 22391 22624 22297 22820 22281 22691 22361 22683 22312 22771 22023 22769 22151 22728 22394 22499 22356 22740 22136 22733 22282 22730 22406 22483 22354 22503 22286 22806 22195 22796 22167 22792 22093 22772 22180 22653 22195 22705 22325 22561 22391 22656 22219 22588 22251 22724 22132 22644 22095 22801 22094 22544 22166 22602 22201 22555 22212 22743 22193 17668 20871 21063 21327 21238 21402 21511 21431 21602 21356 23893 22720 22708 22516 22773 22425 22630 22408 22608 22413 22621 22421 22624 22302 22733 22301 22736 22265 22673 22256 22567 22343 22492 22316 22552 22311 22442 22504 22495 22510 22456 22393 22384 22305 22528 22320 22643 22357 22518 22274 22469 22460 22329 22682 22600 22496 22336 22329 22616 22222 22714 22299 22505 22459 22412 22697 22449 22362 22370 22355 22678 22319 22633 22337 22574 22420 22343 22666 22163 22725 22305 22603 22384 22501 22375 22481 22343 22616 22151 22704 22423 22361 22465 22589 22361 22580 22143 22633 22438 22821 22421 22557 22240 22661 22217 22759 22441 22555 22484 22613 22253 22676 22176 22548 22381 22521 22455 22775 22069 22759 22185 22616 22378 22640 22278 22728 22165 22701 22336 22488 22365 22722 22040 22850 22314 22539 22368 22769 22217 22808 22208 22695 22345 22558 22231 22799 22123 22683 22352 22513 22353 22736 22104 22761 22336 22525 22346 22799 22067 22788 22243 22691 22248 22694 22080 22569 22192 22592 22246 22711 22232 22635 22393 22480 22265 22776 22120 22604 22325 22615 22183 22695 22114 22593 22189 22560 22094 22646 22215 22576 22155 22656 22204 22663 22343 22470 22331 22681 22318 22470 22397 22423 22190 22633 22211 22448 22368 22636 22265 22604 22320 22865 22278 22592 22181 22542 22401 22517 22262 22619 22125 22461 22342 22423 22278 22723 22228 22384 22436 22415 22263 22552 22388 22460 22368 22474 22220 22481 22395 22829 22419 22714 22203 22346 22627 22321 22228 22704 22279 22338 22353 22633 22252 22429 22666 22241 22330 22644 22375 22277 22454 22669 22253 22394 22636 22340 22730 22437 22366 22457 22678 22185 22587 22455 22547 22439 22729 22414 22368 22534 22610 22167 22634 22424 22464 22377 22621 22272 22624 22464 22615 22126 22763 22400 22432 22320 22692 22104 22647 22465 22543 22183 22740 22248 22386 22393 22657 22055 22689 22295 22562 22317 22717 22051 22641 22371 22578 22294 22736 22119 22611 22332 22551 22267 22768 22080 22645 22341 22599 22232 22749 22080 22716 22397 22438 22290 22695 22177 22709 22167 22695 22346 22373 22269 22528 22229 22631 22176 22721 22196 22574 22135 22540 22209 22553 22215 22552 22425 22686 22262 22460 22295 22663 22236 22749 22152 22481 22236 22595 22223 22727 22204 22536 22299 22593 22101 22668 22309 22536 22365 22619 22096 22668 22251 22478 22439 22498 22257 22512 22224 22563 22281 22463 22258 22426 22180 22615 22300 22400 22410 22490 22202 22665 22341 22448 22446 22435 22279 22616 22253 54 8573 11482 13330 13972 14183 14625 14537 15156 15021 32629 27648 25266 24872 24322 23795 24115 23495 23744 23438 23293 23453 23110 23502 23133 23086 23169 9936 15463 16567 17559 17441 18005 18071 17896 18455 18054 28619 25000 24950 24073 24204 23747 23773 23579 23520 23500 23273 23435 23172 23228 23303 23111 23241 16279 18434 18990 19763 19482 19543 19703 19789 19903 36131 25139 24376 23888 23802 23572 23384 23249 23308 23172 23360 23148 23251 22991 23170 22948 23240 22803 19683 19345 20826 20289 21159 20428 21145 20634 21289 26407 24268 23328 23577 23082 23333 22956 23078 22945 23187 22774 23235 22682 23136 22634 23175 22592 18095 21122 21773 21420 21861 21480 22072 21465 22133 21478 24117 22940 23110 22545 23009 22636 22889 22749 22918 22625 22936 22546 23005 22347 22978 22818 22977 22327 22871 22630 22793 22481 22904 22424 22913 22488 22929 22417 22790 22588 22701 22639 22603 22443 22772 22485 22805 22473 22717 22609 22684 22504 22745 22545 22833 22328 22785 22425 22682 22669 22801 22519 22691 22460 22888 22372 22745 22656 22585 22578 22615 22529 22824 22476 22630 22519 22481 22741 22550 22417 22866 22397 22617 22597 22512 22699 22484 22329 22901 22344 22467 22681 22528 22641 22471 22413 22925 22365 22605 22715 22481 22673 22344 22789 22477 22587 22512 22827 22211 22831 22540 22665 22605 22659 22423 22785 22349 22695 22601 22483 22568 22758 22443 22817 22433 22632 22543 22668 22387 22836 22279 22736 22503 22571 22389 22908 22112 22906 22450 22518 22557 22765 22055 22858 22324 22723 22521 22689 22298 22868 22176 22811 22424 22604 22436 22854 22080 22895 22336 22712 22484 22833 22475 22816 22368 22672 22484 22720 22268 22923 22202 22846 22291 22702 22239 22768 22309 22610 22305 22697 22212 22778 22337 22638 22427 22589 22232 22889 22138 22749 22310 22656 22160 22848 22105 22645 22336 22568 22337 22774 22213 22625 22425 22603 22353 22606 22228 22679 22438 22606 22301 22647 22356 22538 22388 22704 22327 22631 22232 22440 22393 22609 22375 22630 22312 22503 22593 22533 22385 22597 22279 22431 22565 22535 22299 22649 22488 22442 22602 22599 22335 22711 22345 22372 22457 22473 22305 22563 22587 22432 22534 22620 22391 22502 22336 22356 22695 22240 22657 22502 22647 22179 22741 22445 22535 22545 22598 22237 22711 22455 22428 22512 22659 22217 22696 22386 22595 22283 22757 22345 22594 22489 22644 22231 22760 22371 22471 22444 22764 22116 22711 22360 22557 22295 22850 22169 22734 22322 22688 22344 22903 22214 22806 22358 22778 22091 22825 22343 22597 22395 22827 22056 22814 22297 22665 22233 22821 22247 23081 22295 22728 22124 22649 22375 22575 22289 22663 22446 22643 22308 22530 22245 22668 22227 22641 22179 22587 22317 22593 22236 22707 22193 22605 22380 22426 22312 22707 22313 22585 22410 22630 22384 22668 22352 22674 22345 22571 22388 22536 22373 22681 22326 22621 22414 22903 22410 22569 22282 22570 22381 22489 22545 22358 22357 22771 22295 22442 22695 22317 22351 22675 22217 22458 22566 22431 22418 22598 22247 22540 22532 22375 22579 22486 22425 22551 22505 22300 22727 22246 5963 10514 12800 13796 14508 14440 14862 15133 15256 43619 29880 26131 25346 24482 24426 11953 16599 17229 18035 17841 18477 18237 18613 18456 18776 28696 25672 24827 24398 24100 11018 18410 19530 19660 20075 19840 20355 19939 20444 20042 27924 24832 24489 23912 24020 23605 20220 20412 21297 20850 21251 21015 21390 20824 21464 27332 24517 23629 23758 23213 23521 21015 22028 21716 22105 21868 22171 21785 22059 21775 22145 23341 23367 22937 23353 22845 23271 22749 23223 22723 23052 22903 23120 22672 23022 22816 22990 22682 23047 22694 22944 22805 23018 22849 23016 22603 22901 22748 22873 22520 22903 22674 22820 22757 22832 22813 22856 22548 22988 22571 22839 22609 22657 22766 22629 22877 22648 22663 22712 22492 22907 22631 23043 22622 22849 22583 22720 22628 22619 22649 22575 22746 22528 22777 22624 22846 22546 22897 22461 22887 22553 22861 22574 22848 22604 22855 22379 22861 22436 22875 22293 22896 22470 22938 22464 22831 22492 22789 22532 22920 22569 22679 22489 22776 22464 22942 22392 22926 22296 22956 22328 22904 22528 22614 22480 22671 22551 22930 22372 22933 22183 23041 22408 22807 22476 
23010 22490 23255 22704 22950 22604 22743 22609 22726 22714 22762 22917 22699 22794 22636 22979 22706 22883 23303 23033 22723 23002 22571 23095 22683 23048 22726 22924 22707 23015 22019 23043 22354 23063 22662 23071 22473 23101 22446 22983 22474 23072 22573 23136 22387 23191 22301 23195 22368 23215 22453 23125 22536 23156 22475 23184 22537 23033 22732 23441 22736 22849 22595 23044 22639 23028 22592 22974 22592 23097 22497 23111 22457 23138 22364 23191 22296 23248 22439 23165 22591 22984 22603 23197 22577 22805 22555 22923 22468 23065 22425 23044 22381 23077 22185 23149 22290 22977 22499 23111 22356 22978 22427 22994 22365 22944 22387 23076 22284 23044 22408 22924 22460 22829 22453 22809 22549 22840 22396 22872 22448 23019 22308 23182 22417 23216 22439 23014 22400 22853 22528 22848 22837 22741 22841 22607 22604 22693 22433 23015 22280 23192 22720 23060 22359 22742 22609 22700 22764 22753 22763 22832 22669 22547 22504 23143 22489 22876 23053 22848 22764 22807 22869 22640 22891 22456 22875 22460 22989 22772 22931 22715 22697 22792 22651 22729 22906 22507 23020 22344 23154 22426 23075 22552 22999 22614 85 78 2039 4049 6409 7025 9096 43664 43668 42568 36452 31747 30128 27712 27395 25924 26033 24708 25040 24084 24550 23602 24167 23495 23931 23193 23904 23348 23659 23073 23581 22992 23497 22743 23445 22721 23496 22707 23356 22752 23503 22775 23348 22570 23273 22551 23276 22587 23255 22532 23123 22387 23085 22599 23104 22376 22913 22387 22843 22607 22992 22275 22945 22513 23155 22528 23079 22609 23048 22472 22949 22409 22964 22401 22960 22371 23006 22588 23140 22560 22889 22390 22380 22254 23085 22615 22833 22359 22859 22315 22921 22554 22930 22448 22452 22257 23030 22676 22971 22391 22692 22721 22876 22428 22747 22340 23111 22533 22786 22568 22799 22784 22855 22436 22629 22744 22900 22305 22633 22656 23027 22405 22732 22762 22909 22339 22620 22744 22895 22353 22561 22855 22733 22506 22993 22573 22597 22602 22746 22433 22576 22883 22534 22384 23000 22474 22457 22861 22683 22487 22696 22953 22448 22914 22596 22887 22668 22657 22597 22788 22670 22951 22376 22895 22913 22785 22729 22693 22739 22589 22731 23177 22747 22817 22615 22972 22357 22944 22395 22835 22823 22874 22458 22907 22603 22947 22479 22933 22640 102 87 4493 8083 10752 12111 13198 13873 14863 43648 43703 39722 34140 30344 28900 26823 26548 25399 25457 24104 24740 23914 24394 23358 24144 23376 23873 23127 23693 23152 23529 23050 23320 23040 23204 22967 23308 22817 23327 22688 23418 22807 23431 22361 23472 22528 23329 22674 23309 22672 23054 22757 23102 22596 23255 22323 23312 22592 23501 22679 22908 22633 23173 22264 23275 22272 23254 22505 23033 22349 23208 22423 23143 22372 23083 22404 23114 22301 23123 22245 23028 22513 22972 22396 22989 22442 23069 22340 23019 22395 22887 22240 23188 22141 23065 22374 23047 22249 23104 22439 23009 22400 22839 22342 23031 22244 22997 22477 22795 22405 23091 22341 22949 22400 22954 22387 22899 22394 22908 22371 22840 22444 23054 22186 22992 22622 22806 22369 23056 22263 22877 22535 23004 22459 22944 22157 22711 22559 22828 22420 22850 22384 22728 22629 22928 22313 22837 22703 22587 22411 22966 22373 22839 22603 22902 22277 22867 22771 22727 22418 23025 22391 22670 22702 22855 22509 22742 22873 22647 22391 22829 22629 22531 22532 23095 22380 22548 22671 22716 22435 22745 22860 22674 22419 23077 22316 22743 22781 22547 22727 22647 119 2406 9292 12279 14318 15091 16649 17030 17435 17168 43691 36144 31053 28391 27075 25835 25070 24807 24514 23865 24031 23755 23878 23142 23747 23249 23511 22866 23552 23107 23181 22952 23357 22933 23049 22837 23401 22662 23017 22628 23356 22805 22985 22685 23190 22705 22955 22657 23313 22592 22886 22514 23292 22642 22987 22530 23284 22587 22944 22425 23296 22567 23035 22356 23276 22592 23029 22333 23168 22599 22988 22476 23196 22542 23031 22468 23153 22545 22984 22295 23305 22253 23223 22272 23046 22307 23213 22249 22937 22372 23121 22298 22967 22336 22886 22567 22896 22256 23005 22464 22981 22269 22988 22290 23086 22391 23079 22374 22985 22391 22894 22431 23048 22308 22897 22336 23050 22457 22784 22464 23029 22477 22855 22465 22905 22375 22915 22333 23073 22357 22921 22376 22835 22370 22925 22487 22879 22492 22835 22412 22841 22469 22797 22442 22895 22490 22827 22506 22551 22663 22583 22653 22780 22666 22816 22852 22785 22543 22711 22503 22940 22387 22759 22397 22946 22537 23092 22468 23255 22331 23022 22291 23040 22364 23030 22396 22951 22454 22689 22512 22689 22663 22545 22583 22595 22644 22493 22839 22598 22837 22588 22605 7232 12990 15745 17240 17833 18857 18903 19575 19543 42674 32877 27898 26374 25745 24692 24249 24052 24102 23669 23577 23176 23655 23185 23350 22908 23015 22950 23243 23085 23302 22819 23171 22616 23013 22567 23181 22858 23225 22720 23136 22797 23221 22673 23200 22617 23232 22625 23207 22578 23215 22573 23207 22537 23160 22480 23241 22541 23260 22520 23200 22669 23281 22592 23044 22392 23047 22314 23019 22457 23127 22574 23353 22496 23012 22151 23082 22436 23131 22400 23088 22201 23075 22391 23082 22164 22896 22480 23057 22338 22851 22329 23099 22306 23237 22368 23073 22200 22883 22295 23099 22299 22992 22312 22977 22357 22966 22407 22867 22245 22883 22402 22892 22348 23099 22440 22807 22432 22903 22338 22993 22452 22837 22460 22925 22353 22913 22453 22874 22306 22841 22320 23068 22384 22852 22601 22852 22291 23033 22430 22645 22765 22739 22458 22841 22271 23040 22517 22519 22728 22614 22626 22852 22341 23159 22328 22833 22474 22630 22771 22672 22674 22793 22354 23044 22176 22989 22403 22848 22551 22567 22605 22626 22773 22806 22776 22679 22705 22822 22669 22679 22928 22716 22823 22617 22904 22673 22865 22569 22851 22441 22924 11742 17159 18395 20040 19869 20824 20547 21084 20768 21504 28912 26519 24512 24507 23432 23853 23229 23593 22904 23421 22889 23408 22675 23203 22825 23123 22796 23013 22848 22920 22824 22960 22651 23050 22663 23184 22538 23190 22216 23270 22284 23273 22410 23195 22487 22400 22488 22885 22608 22976 22651 23110 22432 23260 22292 23216 22375 23108 22528 23033 22489 22940 22465 23180 22192 23096 22219 23023 22455 23072 22534 23126 22455 23137 22337 23167 22454 22991 22391 23072 22493 22796 22287 23035 22192 23119 22167 22974 22285 22964 22464 22953 22284 23002 22386 22936 22404 22890 22432 22747 22331 23125 22531 22838 22457 22888 22439 22854 22340 23047 22264 22897 22452 22867 22277 22959 22288 22994 22305 22804 22503 22867 22486 23045 22475 22868 22437 22734 22496 22973 22322 22983 22359 22641 22615 22572 22450 22996 22295 22736 22775 22560 22500 23040 22692 22813 22812 22833 22697 22983 22366 22910 22478 22562 22715 22691 22488 23108 22464 22632 22827 22681 22453 23072 22329 22663 22821 22656 22392 23088 22380 22892 22784 22426 22855 22677 22692 22568 22928 22400 22741 22759 22770 22626 22923 22696 22815 22788 22857 22448 22928 22609 22700 22729 22925 22229 22939 22667 22776 22530 23059 22373 22855 22598 22833 22368 23040 22606 22855 22729 23061 22313 22956 22528 22756 22483 22962 22305 22935 22624 22963 22407 23150 22459 22952 22574 22953 22336 23153 22373 22845 22482 23105 22379 23285 22385 22915 22533 23143 22119 23042 22473 22915 22356 23132 22304 22881 22497 23047 22164 23092 22471 22791 22321 23180 22292 23009 22240 23058 22224 22983 22442 23070 22306 23021 22347 23013 22446 22969 22521 23012 22497 23005 22321 23116 22112 22865 22307 23047 22297 23118 22359 22888 22221 22928 22139 23003 22551 22822 22229 22965 22388 22796 22385 22962 22300 22965 22426 22808 22422 23045 22352 22841 22451 22784 22352 22873 22404 22784 22460 23035 22359 22938 22298 22609 22369 23063 22732 22917 22567 22522 22519 22898 22421 22864 22654 22785 22580 22900 22496 22877 22614 22761 22596 22656 22311 23110 22263 22676 22727 22737 22889 22551 22495 22844 22414 22909 22385 22977 22473 22860 22597 22612 22534 22661 22791 22883 22668 22642 22957 22349 22865 22701 22725 22625 22882 22422 22790 22738 22528 22731 22987 22504 22848 22716 22513 22629 23047 22400 22861 22611 22711 22660 22912 22325 23018 22678 22733 22599 22811 22464 23172 22517 22880 22600 22747 22457 23098 22311 23130 22489 22716 22486 23010 22309 23169 22404 22961 22549 23000 109 88 71 79 2473 6248 7141 8679 9137 10399 43679 43693 42153 36393 32120 30108 28215 27617 26167 26240 24929 25513 24409 25003 23727 24535 23508 112 85 5529 9060 11838 12897 14425 14685 15809 43625 43681 41088 35299 31035 29607 27193 26996 25461 25991 24695 25096 24041 24732 23794 24206 23493 24025 101 8099 11799 14460 15611 16893 17187 18241 18060 43680 39628 33405 29527 28182 26390 26058 24992 25160 24273 24589 23795 24391 23496 24152 23273 23954 507 10110 13995 16702 17534 19061 18739 19705 19844 20118 39134 31699 28249 26519 25527 25024 24489 24505 23793 24492 23509 24151 23225 23680 23259 23473 23495 12422 17177 19068 19798 20480 20539 21393 20875 21790 21121 29972 26283 25403 24497 24349 23816 23952 23909 23187 23819 23168 23720 23218 23193 23300 23168 23271 23285 23162 23280 23066 23353 22898 23234 23026 23178 23052 23152 22884 23298 22938 23239 22692 23321 22929 22383 22808 23013 22926 23214 22753 23296 22705 23181 22777 22912 22858 23191 22649 23169 22433 23364 22616 22432 22761 23012 22633 23316 22359 23390 22493 23185 22647 23032 22584 23264 22420 23308 22435 23179 22716 22900 22680 23243 22327 23257 22554 23135 22609 23036 22332 23280 22346 23056 22480 23031 22528 23040 22289 23244 22424 23084 22620 23014 22315 23157 22348 23106 22283 23107 22318 23079 22281 23251 22225 23072 22475 23255 22349 23130 22292 23105 22464 22937 22615 22834 22434 23109 22479 22988 22581 23426 22484 23025 22419 23088 22617 22868 22387 22951 22513 23047 22283 22925 22617 22887 22608 23081 22356 22881 22635 22135 22569 22912 22535 23081 22435 22834 22709 22576 22427 23159 22376 22816 22928 22717 22611 23192 22311 22756 22761 22849 22549 23093 22484 22900 22760 22919 22631 22853 22900 22823 22693 22700 23022 22576 22827 22653 22706 22679 23041 22469 22816 22873 22706 22597 23047 22531 22845 22672 22729 22599 22998 22451 22972 22625 22838 22577 23100 22560 23201 22704 22939 22389 23017 22603 22728 22682 22982 22376 23209 22407 22956 22630 22995 22602 23245 22439 22816 22529 23088 22268 23238 22474 22738 22652 23101 22143 23203 22404 22999 22615 23080 22394 23385 22349 22956 22261 23204 22223 22900 22539 22878 22286 23206 22327 22950 22491 22885 22282 23043 22252 22999 22380 23088 22183 23033 22427 22593 22391 23073 22163 22988 22496 22987 22394 23096 22312 22940 22424 22805 22462 22986 22311 22872 22416 22814 22255 22948 22397 22860 22583 23069 22318 22932 22600 22656 22468 23054 22326 22789 22683 22600 22383 23059 22413 22731 22708 22843 22391 22876 22684 22653 22583 22998 22359 22694 22982 22679 22473 23101 22360 22769 22839 22336 22818 22630 22593 22656 22902 22256 22916 22631 22648 22763 22851 22484 23017 22565 22593 22755 22773 22516 22916 22454 22969 22533 22779 22685 22979 22367 22946 22663 22784 22640 22965 22461 23061 22326 23077 22484 22848 22518 23114 22209 23216 22437 23025 22651 23019 22337 23185 22254 22991 22541 22864 22432 23143 22184 23135 22487 22866 22574 23069 22264 23126 22482 22960 22295 23189 22119 23045 22421 22944 22256 22936 22397 22941 22450 207 87 83 1566 5175 6421 8407 8622 10264 43660 43680 43697 39191 33696 31251 118 3081 8313 12104 13383 14939 15431 16592 16309 43639 43688 43706 35820 32516 29654 135 7543 13245 15123 17348 17674 18823 18620 19629 19222 43697 36948 32456 29511 28125 4854 11885 16128 18114 18637 19890 19943 20288 20618 21051 40224 32514 29408 27776 26323 25873 17064 19686 20529 20778 21696 21737 22022 21598 22006 33433 28963 26548 25671 25230 25082 24336 24331 24316 24240 23680 24116 23845 23932 23529 24004 23500 23504 23451 23715 23055 23645 23432 23357 23264 23609 22805 23601 23094 23308 23165 23464 22858 23559 22909 23498 22963 23424 22958 23195 22813 23447 22595 23552 22500 23532 22802 23251 22904 23120 22886 23094 22805 22701 22722 23400 22724 23268 22592 23254 22545 23239 22554 23268 22341 23255 22448 23251 22379 23190 22467 23246 22336 23224 22328 23140 22537 23134 22454 23136 22553 23115 22671 22930 22623 23168 22644 22991 22599 23014 22444 23016 22522 23131 22495 23187 22596 22989 22380 23000 22509 22818 22769 22717 22616 23017 22541 23128 22294 22957 22607 22871 22841 22892 22619 
