# Supplementary material for: An Active Feature Selection Strategy for DWT in Artificial Taste
Source: Hindawi journal article supplement (doi:10.1155/2018/9709505), 2018-01-01
Supplement: f1 [file 9709505.f1.zip › redWine-low-1.txt]

43348 43472 43488 43462 185 4864 13910 18135 20457 21617 22409 22709 22576 23148 23035 23552 23404 23595 23586 23753 23853 23538 24008 23923 24439 23831 24288 24038 23924 24348 24092 24144 24330 24278 24228 24498 24283 24652 24124 24792 23912 24688 24420 24498 24348 24601 24487 24821 24181 24804 24344 24732 24576 24388 24554 24640 24384 24933 24308 24804 24183 24844 24398 24753 24576 24663 24376 24845 24376 24880 24474 25010 24192 25019 24231 24905 24525 24970 24386 24989 24445 24964 24503 24981 24489 24864 24528 24768 24481 24713 24499 24665 24592 24649 24566 24736 24544 24807 24512 24961 24489 24994 24544 25084 24372 25120 24277 25138 24236 25149 24222 25145 24074 25233 24320 25182 24353 25042 24446 24927 24437 24790 24489 24977 24320 25079 24471 25166 24237 25062 24435 24905 24452 24889 24514 24919 24400 25186 24439 25149 24309 24968 24439 24896 24311 25184 24192 25033 24245 24930 24412 24792 24334 24951 24361 24884 24388 24901 24462 24775 24328 25065 24773 24966 24366 24856 24279 24875 24209 25191 24066 25054 24326 24889 24339 25040 24235 24950 24272 24926 24341 24983 24260 24951 8954 19478 21115 22555 22071 23034 22848 23219 22799 23484 31989 28040 26127 26120 25266 25448 24848 25153 24763 25252 24432 24909 24634 24977 24473 24989 24557 24918 24553 25068 24456 24935 24677 24832 24434 24993 24356 24913 24576 24937 24748 24809 24603 24758 24509 24952 24440 24678 24474 24964 24324 24882 24811 24590 24340 24816 24698 24711 24586 24982 24265 24672 24587 24940 24480 24679 24675 24579 24408 24704 24990 24580 24374 24741 24812 24556 24512 25073 24502 24556 24541 25149 24448 24582 24636 25025 24288 24481 24547 24880 24335 24539 24753 24716 24886 24615 24813 24584 24361 24630 24952 24602 24453 24631 24870 24508 24640 24841 24536 24312 24852 24684 24956 24307 24855 24714 25015 24320 24889 24695 25045 24464 24704 24669 24929 24542 24769 24642 24873 24592 24524 24599 24888 24523 24564 24474 24968 24674 24733 24386 25008 24530 24760 24264 24987 24506 25024 24199 24849 24458 24938 24238 24136 24728 25032 24430 24694 24356 24919 24525 24766 24352 25126 24448 24826 24247 25018 24420 24999 24164 25004 24377 25036 24215 24918 24465 24968 24385 24822 24261 25093 24420 24857 24280 25167 24397 24898 24040 25076 24436 25033 23965 20162 21998 23427 22840 23474 23108 23930 23395 23824 34405 28188 25984 25861 24779 25372 24823 25359 24433 24954 24473 25261 24535 24974 24192 25111 24304 25082 24172 24982 24314 25122 23895 24752 23888 24666 24238 24713 24034 24704 24109 24800 24112 24770 24087 24855 24008 24633 24006 24764 24213 24819 24132 24728 24002 24826 23904 24744 24057 24788 24232 24650 24072 24696 24135 24886 24121 24683 24168 24784 24310 24539 24077 24696 24200 24744 24061 24501 24193 24745 24308 24481 23977 24568 24232 24772 24280 24600 24123 24654 24152 25047 24103 24535 24135 24349 24026 24612 24277 24552 24441 24516 24405 24392 24023 24526 24369 24294 24156 24733 23975 24298 24295 24662 24038 24448 24504 24273 24168 24608 24290 24236 24200 24887 24040 24277 24423 24556 23484 24437 24616 24212 24160 24803 24094 24340 24588 24153 24152 24716 24049 24433 24632 24035 24328 24412 24132 24765 24097 24723 24302 24484 24229 24385 24412 24377 24481 24252 24671 24206 24758 23882 24661 24073 24677 24156 24622 24200 24578 24256 24413 24398 24522 24500 24333 24453 24337 24412 24289 24360 24369 24321 24355 24236 24412 24321 24366 24298 24390 24276 24430 24392 23660 23667 24087 23572 24387 23706 24452 23664 24613 23701 25175 24329 24649 24207 24460 24184 24568 24186 24707 24024 24864 23763 24896 23898 24650 24084 25050 24167 24496 24138 24724 23941 24874 23796 24904 23975 24695 24073 24429 24093 24662 24002 24741 23814 24844 24089 24700 24184 24654 24052 24819 23778 24750 23960 24546 24064 24724 23966 24609 24004 24540 23895 24744 23829 24536 23937 24503 23959 24678 23936 24615 24132 24497 23847 24681 23746 24555 24000 24727 23856 24581 23930 24536 23936 24742 23924 24473 23938 24698 23758 24568 23974 24677 23982 24610 24107 24549 23968 24483 24122 24385 23878 24493 24204 24432 23996 24496 24092 24374 23961 24552 24191 24292 23904 24416 24170 24363 23872 24488 24132 24368 23959 24388 24148 24293 23883 24373 24205 24263 24007 24335 24341 24400 24131 24348 24325 24408 23980 24327 24204 24394 23880 24231 24256 24601 24009 24217 24144 24609 24153 24320 23952 24307 24488 24112 23943 24276 24406 24579 23953 24129 24021 24448 24398 24036 24055 24281 24535 24366 24020 24218 24579 24192 24368 23863 24374 24272 24586 24027 24291 24023 24619 24192 24403 23938 24338 24334 24489 24196 24327 23963 24362 24000 24333 23909 24161 23809 24305 23961 24428 23843 24614 23925 24550 24138 24660 24249 24391 23764 24490 24053 24557 24048 24467 23692 24500 24173 24694 24087 24593 23716 24467 24016 24730 24010 24640 23849 24235 23769 24694 24031 24692 23885 24454 23788 24533 24016 24792 23886 24546 23579 24464 23922 24647 23963 24568 23808 24327 23844 24544 24033 24704 23937 24395 23584 24515 23753 24680 23775 24616 23838 24370 24129 24393 23757 24432 23959 24595 23730 24472 23789 24439 23876 24603 24012 24631 23758 24644 23661 24426 23751 24514 23861 24528 23655 24361 23747 24428 23832 24465 23924 24448 23797 24483 23905 24462 23837 24416 24027 24470 23841 24186 23820 24280 23877 24384 24002 24549 24018 24264 23904 24337 23876 24444 23974 24215 24087 24422 23879 24278 23970 24250 23848 24312 23949 24349 24214 24484 24064 24000 23756 23994 23939 24336 24011 24527 24331 24480 23929 24064 24067 24074 23856 24213 24262 24513 24286 24216 23881 23900 23990 23959 23939 24022 24226 24407 24433 24313 24064 23860 24155 24014 24392 24220 24473 23936 24508 23952 24311 23800 24057 23898 24438 24265 24407 24064 24384 24138 24226 23767 24298 23997 24408 24043 24584 24008 24460 24020 24353 23723 24161 23985 24264 24129 24676 24199 24580 24021 24569 23916 24387 23751 24516 23939 24675 24080 24542 23982 24520 23841 24312 23681 24535 23761 24584 23874 24723 23910 24640 23888 24577 23640 24278 23641 24488 23802 24615 24000 24551 23977 24592 23828 24326 23636 24554 23828 24626 23745 24658 23641 24486 23872 24625 23763 24237 23534 24309 23740 24360 23766 24455 23872 24420 23572 24260 23587 24451 23720 24454 23866 24515 23553 24418 23656 24386 23852 24500 23702 24243 23795 24343 23788 24455 23712 24234 23865 24474 23836 24234 23853 24340 23759 24289 23852 24391 23959 24273 23953 24210 23881 24222 23860 24425 23895 24397 23766 24481 23748 24320 23822 24256 23887 24026 24004 24273 24166 24184 24272 24027 24141 24295 23818 24298 23893 24461 23984 23955 24231 23989 24230 24053 23827 24517 23885 24134 24134 24026 24024 24175 24179 23940 24348 23639 24348 24001 24231 23787 24502 23906 24345 24168 24221 23875 24392 23913 24167 24021 24369 23666 24451 24039 24200 23991 24418 23832 24589 23885 24397 24000 24354 23927 24320 23896 24491 23611 24578 23510 24486 23904 24412 23940 24208 23936 24344 23897 24391 23720 24626 23596 24713 23513 24650 23591 24551 23432 24569 23681 24536 23740 24440 23841 24478 23810 24432 23909 24460 23656 24419 23654 24412 23669 24460 23674 24538 23674 24519 23745 24416 23617 24508 23607 24384 23712 24487 23585 24410 23721 24269 23832 24320 23764 24252 23737 24448 23631 24404 23913 24211 23701 24284 23887 24024 23777 24221 23697 24308 23752 24260 23808 24311 23992 24357 23840 24297 23702 24379 23660 24107 24115 24077 23894 24241 23719 24134 23958 24076 24125 24053 23888 24308 23673 23965 24298 23922 23745 24512 23784 24013 24438 23867 23856 24390 23879 23992 24295 23768 24428 24011 24242 23840 24466 23744 24181 24097 24217 23981 24250 23940 24196 24112 24330 23664 24356 23932 24235 23816 24417 23822 24306 24005 24352 23704 24441 23946 24277 23688 24598 23804 24184 23745 24509 23766 24398 23960 24482 23656 24320 23910 24452 23590 24448 23854 24463 23657 24566 23789 24332 23643 24612 23858 24142 23736 24572 23884 24278 23680 24620 23737 24424 23582 24395 23639 24521 23622 24420 23768 24365 23545 24327 23671 24514 23712 24428 23596 24481 23504 24296 23604 24398 23636 24252 23700 24272 23844 24224 23721 24258 23868 24324 23744 24208 23701 24356 23664 24113 23726 24193 23905 24241 24106 24305 24009 24331 23690 24052 23940 24182 24153 23913 23732 24154 24056 24328 13019 20432 21542 22127 22401 22396 26274 24561 24192 29971 25249 24701 24517 24545 24505 24322 24171 24142 24624 24256 24525 23760 24275 24081 24381 24173 24281 19596 24563 23876 24028 23684 23885 23328 23905 23744 26432 24241 24400 23974 24682 24175 24602 24093 24248 23981 24505 24038 24618 23857 24234 23797 24558 22128 24028 23360 23944 23296 24219 23598 24212 23623 24065 23976 24501 23987 24696 23875 24437 23592 24380 23659 24408 23741 24537 23661 24513 23657 24278 23776 23961 23476 24137 23537 23978 23424 24220 23613 24334 23363 24689 23680 24331 23751 24369 23944 24105 23823 24248 23760 24294 23901 24325 23668 24268 23829 24215 23621 24184 23813 23973 23412 23978 23831 24139 23947 24153 23801 24176 23808 24120 24081 24497 24081 23906 24001 23906 23786 24023 24288 24466 24014 23800 23819 23952 23863 24030 24286 24311 23655 23745 24233 23880 24416 23881 24283 23971 23979 23914 24088 24152 24345 24044 24209 23664 24100 23780 24438 23970 24401 23793 24112 23770 24133 23960 24487 23868 24496 23702 24015 23705 24343 23895 24542 23809 24420 23440 24505 23680 24592 23752 24560 23597 24364 23528 24320 23849 24495 23912 24398 23495 24273 23696 24579 23800 24457 23772 24262 23479 24263 23637 24332 23680 24362 23656 24199 23616 24238 23637 24398 23443 24270 23636 24342 23648 24480 23660 24150 23654 24240 23804 24381 23762 24124 23680 24181 23769 24357 23780 23996 23771 24171 23754 24276 23758 24064 23643 24072 23956 24288 23559 24041 23927 24238 23700 24102 24024 24000 23633 24093 24094 24039 23776 24368 23751 24008 24218 23954 23874 24034 23706 24276 23617 23920 24093 23942 23976 23640 24371 23843 24136 24007 24212 23778 24434 23632 24236 23901 24096 24044 24087 23994 24232 23872 24396 23716 24256 23861 24285 23847 24155 23852 24352 23680 24390 23516 24566 23808 24272 23908 24026 23927 24183 23830 24343 23616 24430 23397 24499 23406 24538 23691 24407 23748 24131 23850 24322 23656 24471 23398 24384 23630 24436 23712 24120 23699 24503 23456 24338 23744 24327 23747 24168 23620 24433 23637 24105 23552 24277 23683 24136 23543 24352 23600 24263 23730 24177 23558 24306 23549 24233 23854 24177 23613 24230 23701 24223 23821 24100 23600 24285 24080 24200 23885 24024 23768 24272 23714 24128 23803 24008 23643 24276 23715 23968 23820 24244 23489 24044 24005 23825 23880 24320 23745 23815 23809 24354 23891 24052 24194 24016 23712 24128 24171 23831 23799 24275 23799 23893 23828 24305 23863 24157 24151 23728 24233 23989 24372 23602 24165 23904 24184 23794 24230 23997 24096 24048 24270 23959 24042 23732 24426 23809 24007 23719 24265 23822 23894 23668 24405 23713 24132 23794 24513 23819 24091 23697 24460 23879 24139 23606 24416 23790 24269 23431 24407 23722 24484 23405 24305 23737 24439 23597 24115 23570 24410 23744 24027 23589 24499 23745 24417 23452 24449 23552 24466 23555 24404 23508 24192 23680 24228 23560 24167 23591 24295 23488 24327 23432 24226 23642 24264 23539 24204 23541 24352 23598 24249 23456 24087 23620 24310 23574 24224 23611 24121 23762 24203 23582 24113 23624 24256 23802 24155 23666 19386 19485 21701 21421 22744 22065 22622 22512 22760 22215 33300 27258 26031 25348 25081 24562 19940 22042 22800 23182 23350 22962 23229 23083 23401 36052 27542 25424 25049 24910 24864 19527 22756 22883 23540 23376 23594 23826 24268 23683 23498 24777 24507 24496 24078 24215 23192 23948 23759 24120 23832 24029 23500 23734 23828 24167 24285 24348 23938 24075 23750 24262 23840 24295 23729 24070 23552 24118 23936 24303 23795 24367 23677 24256 23989 24480 23965 24328 23447 24244 23749 24512 23844 24328 23586 24193 23588 24521 23748 24455 23571 24090 23246 24458 23776 24562 23693 24361 23336 23560 23752 24374 23796 24394 23591 24106 23594 24422 23849 24583 23771 24358 23512 24279 23527 24358 23642 24384 23508 24320 23478 24274 23598 24231 23745 24162 23544 24221 23504 24268 23665 24352 23488 24182 23481 24269 23687 24430 23606 24202 23516 24157 23611 24227 23738 24031 23778 24022 23669 24309 23812 24212 23542 24080 23644 24152 23664 24243 23645 24034 23637 24080 23626 24297 23722 24053 23662 24007 23719 24216 23991 24334 23554 23901 23655 24058 23840 24376 23928 23905 23639 23928 23700 23949 24017 
19738 20210 19481 20345 19910 20462 19495 20609 19833 20227 19760 20598 19703 20279 19847 20574 19520 20384 19598 20599 19628 20352 19623 20391 19419 20327 19788 20342 19637 20263 19825 20256 19572 20485 19611 20864 19491 20503 17209 18301 17471 18494 17735 18484 18121 18588 18231 18862 18128 19168 18269 19219 18457 19327 18620 19281 18838 19448 18752 19457 18855 19685 18928 19582 19108 19570 19349 19575 19300 19848 19234 19739 19280 19869 19278 20045 19457 20068 19397 20151 19512 20102 19608 19998 19575 20042 19568 20012 19713 20035 19639 20264 19744 20161 19827 20135 19817 20104 19877 20177 19913 20020 20047 20233 19937 20406 19988 20452 19911 20519 20150 20480 19841 20535 20003 20304 20140 20384 20323 20314 20382 20280 20244 20340 20197 20609 19979 20659 19960 20448 20239 20340 20658 20445 20316 20327 20293 20811 19986 20489 20297 20433 20565 20241 20337 20480 20076 20791 20202 20458 20591 20484 20558 20493 20277 20864 20123 20488 20617 20454 20787 20353 20665 20522 20630 20372 20800 20144 20952 20279 20816 20469 20712 20377 20800 20291 20674 20666 20615 20460 20729 20434 20858 20526 53 55 1830 3773 5761 7052 8499 8509 9905 10166 32629 26788 24675 22437 22144 21308 21408 20642 21254 20524 20765 20691 20854 20065 20977 20278 20679 20314 20811 20347 20763 20344 20919 20007 21045 20355 20498 20343 20909 20173 20850 20384 20987 20071 20952 20337 20647 20300 20983 20232 20976 20457 21024 20009 20966 20314 20969 20197 21082 20292 20736 20314 21008 20116 20943 20309 21095 20020 20917 20385 20965 20003 21035 20399 20837 20137 21065 20469 20754 20256 21049 20429 20672 20354 21038 20195 20916 20403 21084 20203 21083 20165 21072 20133 20882 20160 21100 20221 20939 20199 21096 20207 20823 20257 21092 20097 20770 20344 21143 20125 20774 20425 21035 20121 20875 20301 21144 20065 20910 20166 21132 20229 21293 20160 20985 20247 21476 20263 21010 20341 20903 20302 20952 20358 20679 20166 20814 20494 20798 20341 20951 20581 20935 20446 20953 20424 21013 20379 20837 20452 21052 20361 20803 20429 20967 20420 20983 20281 20795 20499 20741 20396 20892 20586 20919 20344 20853 20525 21033 20490 20862 20505 21020 20152 20811 20510 20987 20459 20647 20470 20913 20739 20549 20468 20821 20808 20808 20705 20864 20590 20929 72 7788 10875 12625 12994 13553 13804 14503 14870 14787 34208 26855 23813 22660 21232 21223 20981 21332 20668 20655 20604 20953 20878 20548 20380 20849 20924 20775 20681 20688 20675 19867 19378 19571 19857 20285 20247 19814 20301 20322 20475 19928 20155 19938 20460 20040 20203 19893 20483 20133 20297 19804 20189 20206 20436 19997 20017 20147 20515 20185 20279 19954 20371 20241 20615 20035 20310 20089 20679 20127 20429 19806 20419 20102 20544 19881 20311 19993 20576 20160 20213 19809 20548 20161 20661 19822 20389 20037 20565 19893 20297 19799 20683 20071 20595 19612 20483 20016 20535 19724 20519 20049 20668 19661 20562 20033 20555 19741 20723 19882 20311 19868 20698 19706 20058 19932 20595 19480 20745 19927 20401 19845 20725 19862 20344 19977 20655 19785 20459 20163 20552 19571 20652 19843 20297 19815 20592 19551 20778 19806 20599 19611 20684 19659 20577 19639 20576 19958 20384 19841 20408 19851 20967 19939 20404 20023 20379 19814 20475 19744 20579 19688 20625 19665 20718 19605 20585 19593 20533 19584 20348 19600 20338 19605 20278 19685 20235 19671 20428 19787 20410 19826 20116 19933 20663 19898 20569 19865 20451 19811 20192 19781 18706 18518 19239 18632 19308 18594 19344 18677 19447 18696 20742 19937 20251 19858 20064 19814 20256 19810 20327 19665 20391 19866 20182 19632 20241 19913 20025 20051 20001 19861 20101 19784 20447 19868 20207 19773 20155 20225 20182 19936 20302 19760 20485 19596 20049 20184 20055 20105 20042 19808 20556 19613 20045 20086 19917 19924 20332 19728 20100 20112 19941 20244 19937 19719 20433 19765 19849 20132 19675 20509 20039 20078 20054 20545 19862 19976 20055 20339 19645 20298 19969 20017 19979 20324 20004 19780 19900 20168 19868 20157 20059 20327 19853 20247 20124 20361 19570 20369 19994 20359 19584 20407 19829 20321 19493 20240 19916 20273 19799 20535 19867 20365 19733 20487 19784 20280 19405 20395 19837 20306 19501 20407 19904 20387 19536 20456 19926 20387 19516 20375 19802 20471 19597 19888 19710 20566 19552 20496 19771 20544 19609 20171 19712 20480 19659 20153 19665 20629 19843 20235 19587 20496 19765 20371 19385 20449 19817 20503 19606 20311 19478 20421 19661 20442 19378 20224 19596 20416 19632 20327 19468 20297 19838 20375 19493 20210 19543 20394 19597 20214 19422 20408 19640 20545 19507 20324 19505 20320 19716 20428 19542 19301 18976 19760 19249 19760 19107 19584 19158 19784 19189 20540 19603 20116 19642 20240 19706 20183 19655 20134 19655 20243 19687 20151 19506 20054 19705 20228 19718 20324 19301 20038 19644 20193 19761 20294 19619 19925 19610 20149 19863 20360 19899 19893 19525 20050 19895 20120 20202 20107 19564 19863 19652 20041 20037 20373 19779 20043 19685 20042 19956 20231 20007 19934 19644 19916 19804 20133 20215 20297 19797 19713 19654 19863 19795 20231 20175 20187 19681 19622 20173 19873 20280 19929 20201 19671 19989 19620 20198 20085 20114 19899 20092 19806 19767 19732 20114 20013 20224 19905 20168 19654 19859 19811 20337 19891 20452 19863 20334 19616 19981 19699 20100 19857 20384 19719 20280 19579 20033 19403 20112 19554 20301 19776 20349 19748 20228 19669 20086 19367 20428 19528 20425 19792 20533 19740 20455 19591 20224 19411 20314 19510 20487 19756 20373 19653 20391 19521 20038 19479 20248 19693 20459 19799 20403 19671 20405 19560 20224 19565 20419 19443 20391 19514 20297 19595 20397 19617 20179 19364 20527 19442 20180 19681 20292 19546 20363 19648 20344 19421 20470 19385 20287 19536 20305 19559 20393 19592 20278 19497 20160 19547 20200 19376 20010 19447 20185 19680 20224 19481 19844 19392 20506 19521 20074 19696 20235 19672 20289 19773 20117 19533 20112 19620 20136 19680 20200 19697 20327 19609 20070 19493 20403 19680 20033 19860 20086 19879 20213 19959 20106 19699 19815 19700 19861 19591 19833 19667 20073 20048 20423 19918 19875 19509 19759 19552 19824 19792 20065 19889 20410 20010 20224 19716 19757 20215 19787 19941 20044 20055 19863 20186 19557 19936 19411 20075 20066 20248 19921 20133 19722 19831 20300 20073 20041 20258 19849 19883 19839 20245 19908 20275 19575 19923 19665 20366 19872 19985 19836 20407 19742 20062 19689 20432 19717 20301 19833 20243 19618 20253 19499 20356 19505 20384 19629 20368 19568 20480 19535 20593 19414 20533 19448 20471 19470 20359 19647 20266 19813 20048 19746 20433 19798 20381 19620 20490 19447 20538 19757 20250 19521 19801 19661 20402 19432 20335 19432 20105 19527 20134 19622 20333 19712 20386 19594 20292 19469 20379 19413 20325 19670 20237 19371 20356 19540 20117 19661 20263 19397 20411 19609 20177 19724 20221 19539 20142 19630 20305 19684 20105 19712 20112 19751 20135 19509 20228 19563 20349 19724 20054 19696 20055 19886 20019 19911 20112 19664 20097 19528 20183 19695 20245 19635 20301 19586 20396 19739 20298 19592 20186 19724 20104 19797 19927 19680 19808 19764 19628 19916 19916 19775 19776 19757 19799 19993 19601 20292 19577 20336 19735 20224 19765 20212 20005 19968 20070 19950 20039 20121 19856 20199 19819 20238 19629 20298 19794 20150 19964 19940 19913 20137 19798 20402 19440 20404 19704 20160 19910 20009 19949 20233 19632 20411 19488 20486 19709 20114 19799 20352 19456 20599 19443 20421 19612 20209 19648 20421 19413 20379 19668 20200 19728 20418 19406 20608 19618 20327 19507 20394 19457 20274 19769 20078 19552 20407 19431 20194 19634 20260 19491 20391 19382 20209 19515 20297 19419 20354 19675 20579 19442 20420 19431 20120 19693 20169 19527 20189 19659 20075 19514 20256 19458 20140 19772 20156 19595 20121 19733 20068 19603 20276 19686 20136 19800 20399 19533 20075 19825 20126 19826 20049 19975 19933 19719 20056 20281 19899 19815 20116 20234 19958 19613 19986 20166 19739 19615 20123 20239 19809 19667 20000 20226 19885 20080 20085 20204 19601 20117 19897 20237 19764 20131 20094 20200 19906 19940 19976 20180 19868 19972 19965 20345 19815 20203 19617 20421 19923 20218 19631 20308 19816 20423 19688 20149 19605 20579 19773 20303 19464 20248 19863 20423 19744 20078 19564 20610 19660 20524 19267 20363 19892 20376 19657 1461 7335 9906 10177 11660 11125 19205 17427 18055 22384 21296 20136 20657 19861 20602 19803 20319 19653 20204 19493 20447 19319 20176 19501 20204 19546 14836 16433 19003 18044 18594 18215 18711 18083 18659 18157 22635 20143 20361 19902 20471 19733 20352 19821 20123 19223 20158 19845 20342 19740 20032 19559 20100 17636 19069 18881 18892 18926 19107 18830 19298 19173 19145 20039 19947 19816 20184 20111 20134 19619 19921 19686 20086 20015 20391 19588 20092 19574 20158 20066 19053 19446 18919 19516 19273 19760 19430 19559 19302 19320 20053 20265 20080 20256 19790 20135 19492 20439 19843 20374 19867 20223 19778 19993 19557 20396 19952 20009 19481 20010 19209 20114 19548 20217 19617 20262 19953 20256 19367 20468 19800 20447 19732 20194 19429 20160 19700 20543 19661 20439 19700 20284 19430 19701 19394 20338 19545 20425 19749 20240 19699 20081 19585 20257 19520 20541 19615 20124 19610 20282 19539 20169 19584 20385 19529 20433 19600 20272 19747 20365 19849 20157 19701 20039 19640 20149 19749 20229 19819 20082 19601 20218 19640 20209 20033 20201 19571 20162 19773 20197 19760 20324 19984 19865 19700 20003 19792 20157 20166 20283 19650 20039 19726 19976 19993 20457 20050 19749 19707 19991 19966 20427 19951 19639 20107 19874 20441 19933 20273 19825 19886 20035 20135 20077 20320 20021 19995 19905 20277 20040 20416 19937 20176 19659 20245 19968 20448 19895 20181 19473 20339 19856 20463 19773 20224 19506 20456 19842 20369 19636 20428 19790 20475 19637 20400 19752 20550 19428 20429 19765 20336 19658 20456 19735 20827 19817 20319 19581 20508 19415 20676 19722 20288 19601 20524 19623 20460 19507 20356 19867 20327 19488 20428 19515 20500 19772 20319 19687 20264 19686 20152 19559 20427 19703 20260 19632 20216 19777 20156 19827 20195 19731 20296 19569 20359 19501 20278 19808 20120 19749 20264 19772 20128 19801 20184 19706 20298 19238 20272 19704 20188 19977 19984 20107 19989 19880 20155 19761 20539 19993 20281 19783 20056 20315 20050 19895 20280 19811 20143 19824 19940 20265 19845 20380 19863 20243 19985 19971 19861 20506 19679 20241 19901 20445 20109 20071 19925 20240 19895 20160 20016 20241 19900 20480 19673 20371 19968 20145 19843 20433 19768 20243 19861 20332 19651 20480 19811 20312 19896 20572 19540 20501 19822 20274 19683 20515 19619 20353 19852 20501 19440 20593 19752 20119 19685 20525 19664 20445 19927 20547 19398 20453 19703 20417 20060 20552 19847 20395 19584 20336 19687 20331 19617 20467 19732 20323 19552 20577 19445 20362 19575 20481 19783 20455 19719 20280 19487 20364 19865 20216 19553 20353 19881 20087 19693 20275 19808 20420 19639 20362 19799 20327 19619 20234 19866 20149 19669 20337 19962 20224 19634 20133 20059 20001 20207 20193 19897 20401 19625 20119 19956 20386 19937 20051 19823 20216 20295 19927 19739 20143 20178 20131 19774 20059 19943 20496 19835 20295 19799 20251 20208 19708 20459 20121 20372 19945 20135 19120 20432 20002 20238 19808 20155 20163 20310 19961 20122 19874 20269 20027 20361 19840 20119 19808 20454 19945 20310 19646 20224 19991 20533 19943 20241 19824 20469 12653 8691 10362 11879 12272 13560 13316 14127 13673 14359 36475 28081 24045 23267 21683 21994 8817 14250 14962 16419 16081 16655 16406 17447 16876 38612 26736 24050 22221 22415 21293 11218 15468 17447 17846 18455 17949 18873 19090 19468 23053 20896 20180 20771 19996 20500 18592 19546 18952 19798 19108 19843 18815 19867 18966 19869 19961 20626 19904 20344 19820 19421 19404 19994 19403 19981 19415 19990 19514 20003 19599 20376 19720 20307 19676 20304 20007 20292 19508 20254 19791 20308 19846 20234 19624 20200 19724 20246 19977 20428 19919 19888 19784 20146 19883 20298 20105 20075 19597 19864 19725 20042 20135 20387 19783 19882 19701 20037 19921 20288 20225 20082 19534 19919 19767 20074 20099 20465 19750 19707 19911 20327 20151 19916 20226 19607 20229 19865 20509 20019 20208 19758 19901 19889 20357 20067 20244 19998 20074 19768 20177 20087 20381 19989 20195 19548 20151 19817 20489 19920 20426 19736 20052 19715 20491 20051 20500 19799 20139 19605 20503 19997 20364 19728 20298 19579 20472 19807 20580 19871 20444 19759 20212 19384 20453 19939 20589 19735 20431 19526 20411 19605 20636 19809 20553 
21143 20956 20912 20898 20883 21259 20791 20959 21133 20796 20645 21149 21005 21143 20755 21417 20760 20881 20819 21329 20848 20888 21021 21233 20174 20900 21178 20605 21077 20942 21008 21009 21124 20904 20997 20878 21185 21031 20825 20919 21109 20944 21282 21064 21158 20660 20887 21052 21112 20695 21239 20982 21032 20737 21264 20960 20835 20816 21209 21004 21016 20925 21239 20820 21031 20848 20971 20846 21255 20712 21156 20659 21367 20840 21260 21031 21205 20907 21258 20800 21317 20742 21267 20690 21280 20738 21301 20200 21315 21201 21321 21309 21335 20961 21352 20752 21379 20731 21427 20764 21424 20775 21397 20903 21492 21014 21373 21003 21366 21078 21338 21069 21222 21095 21184 21155 21376 21083 21465 20915 21545 20887 21494 20885 21500 21154 21345 21207 21291 21169 21406 21076 21493 20947 21457 20904 21561 21152 21399 21122 21330 21134 21622 20666 21614 21072 21389 21088 21287 21009 21573 20978 21525 20980 21504 21120 21460 20959 21617 21019 21460 21185 21439 21106 21408 21095 21617 21085 21507 21153 21443 20983 21568 20873 21564 20992 21397 21099 21403 20956 21608 21000 21366 21171 16 2020 4948 5898 7200 7811 9341 9293 10256 32688 24713 22406 22033 21209 21474 21056 21425 20945 21317 21101 21274 21003 21477 20807 21260 21040 21315 20922 21292 20987 21273 20960 21520 21168 21274 21079 21190 21020 21413 21050 21319 21083 21487 21047 21380 21194 21227 20978 21387 21207 21760 21096 21563 20888 21233 21171 21434 21021 21289 21325 21220 21139 21451 21188 21274 21077 21491 20941 21216 21237 21711 21073 21271 21306 21468 21143 21334 21498 21288 21018 21431 21483 21194 21082 21431 21498 21272 21085 21493 21319 21193 21166 21632 21173 21251 21184 21699 21127 21237 21150 21684 21104 21255 21210 21702 21124 21376 21364 21329 21256 21294 21575 21413 21232 21207 21636 21376 21241 21172 21577 21393 21295 21251 21527 21388 21274 21250 21525 21486 21458 21191 21556 21335 21399 21016 21383 21321 21638 21120 21531 21440 21591 21155 21888 21309 21547 21323 21370 21292 21637 21294 21289 21189 21638 21385 21512 21072 21568 21307 21557 21044 21560 21364 21582 21041 21506 21313 21593 21224 21514 21377 21543 21237 21357 21196 21689 21275 21577 21239 21607 21259 21655 20930 21555 21289 21746 21053 21319 21287 21716 21205 7501 11612 13700 14119 15046 14906 15778 15806 16411 16008 25741 22566 22110 21496 21545 21232 21724 21271 21474 20891 21669 21193 21640 20920 21568 21081 21646 21115 21587 20989 21491 20722 21230 20766 21212 20703 21414 20763 21282 20882 21286 20936 21358 20834 21297 21015 21301 20720 21217 20679 21491 20821 21281 20834 21337 20824 21248 20664 21216 20871 21384 20723 21170 20787 21338 20934 21175 20839 21280 20918 21367 20839 21105 20800 21281 20965 21056 20771 21112 20931 21262 20971 21243 20815 21390 20931 21228 20852 21066 20941 21124 20758 21161 20836 21267 20664 21159 20928 21337 20729 21165 20855 21306 20637 21091 21047 21158 20789 21206 21088 21022 20911 21303 20955 21070 20938 21239 20843 21196 21190 20993 20807 21073 21225 20972 20888 21309 20992 20971 20881 21360 20905 20976 21295 21064 20833 21392 20959 20993 21223 21145 20875 21210 20822 21248 20704 21025 21092 20952 21293 20945 21315 20909 20954 20971 21174 21072 21072 21117 20970 20965 20784 21078 21064 21071 21113 20947 21223 20999 21289 20830 21255 20823 21230 20810 21254 20685 21144 20964 21231 20832 21254 20844 21203 20769 21184 20746 21282 20780 21327 20833 21276 20008 20625 20093 20608 20183 20541 20270 20545 20272 21633 21018 21158 20816 21269 20761 21180 20531 21213 20667 21212 20922 21147 20928 20935 20943 21223 20729 21341 20075 21312 20640 21319 20875 21117 20800 21111 20845 21303 20898 21276 20736 21191 20886 21012 20959 21235 20717 21280 20540 21248 20919 21081 20889 21294 20683 21294 20768 21187 20720 21304 20632 21192 20603 21129 20781 21113 20723 21216 20672 21074 20782 21308 20668 21133 20814 21179 20617 21303 20619 21195 20763 21315 20659 21226 20877 21160 20672 21188 20848 21248 20746 21308 20823 21153 20756 21281 20564 20971 20656 21165 20655 21085 20770 21331 20682 21041 20752 21240 20748 21169 20701 21195 20928 21140 20774 21213 20568 21155 20784 21154 20744 21147 20759 21263 20624 20917 20727 21223 20518 20931 20864 21237 20733 21017 20762 21220 20691 20896 20711 21111 20869 21148 20823 21167 21063 21079 20640 20887 21121 20888 20658 20903 20971 21217 20588 20806 20771 21216 21056 20828 20563 20848 21107 21084 20916 20950 20816 21280 20880 20857 21005 21104 20992 20860 20833 20797 21164 20881 21046 20792 21003 20944 21112 20970 20869 20850 21072 20956 21104 20892 20813 20430 20852 20657 20812 20437 20755 20410 20848 20554 20839 20727 20935 20641 21093 20839 21078 20647 20967 20709 21175 20786 21191 20720 20846 20753 21294 20906 21226 20787 20842 20628 21113 20848 21171 20832 21111 20720 21077 20800 21221 20730 21123 20567 20928 20611 21305 20755 21251 20643 20953 20668 21232 20767 21213 20807 21073 20512 21033 20796 21255 20858 21267 20592 20902 20580 21284 20572 21133 20664 21126 20455 21053 20537 20998 20581 21168 20665 20888 20334 20972 20643 21043 20589 21153 20696 21003 20697 20918 20584 21041 20663 21259 20731 21068 20394 21027 20612 20945 20647 21093 20760 21037 20446 21000 20698 21117 20738 21208 20748 20961 20595 20869 20659 21042 20648 21189 20855 21013 20584 20976 20546 21041 20692 21016 20786 21109 20809 21144 20487 20902 20584 20976 20784 21039 20728 21208 20935 20992 20555 20768 20576 21017 20746 21034 21084 21376 20898 20906 20501 20921 20547 20902 20741 21067 21096 21207 20869 20720 20613 20740 20636 20793 20684 20936 21116 21262 21004 20904 20628 20777 21076 20920 21137 20905 21035 20796 21120 20801 20748 20999 20870 20977 21029 20871 20972 20953 20971 20695 20676 20717 21010 20890 21033 20913 20992 20739 21008 20623 20726 20425 20640 20787 21037 20902 21063 20804 21029 20717 21082 20601 21009 20653 21047 20802 21139 20672 21125 20775 21029 20512 20871 20629 21059 20669 21144 20761 21261 20730 21203 20687 21017 20438 20910 20642 21104 20776 21273 20758 21157 20816 21134 20502 20887 20517 21108 20656 21233 20612 21120 20663 21286 20799 21095 20496 21456 20434 20964 20551 21111 20888 21302 20759 21021 20560 21076 20572 21114 20604 21152 20688 20999 21026 21070 20574 21092 20726 20997 20574 20993 20584 21126 20825 20909 20647 21115 20776 20907 20664 21033 20704 20930 20560 21096 20741 20955 20663 21105 20643 21066 20848 20950 20507 20879 20699 21018 20743 20921 20635 20996 20573 20992 20650 21223 20547 21127 20684 20977 20593 20883 20944 20829 21058 20921 20680 20973 20685 21248 20722 20725 20940 20848 20978 20832 20618 21256 20679 20883 21155 20967 20628 20909 21024 20444 21148 20793 20780 20889 21050 20622 21125 20900 20905 20800 21098 20761 21002 20888 20860 20949 21090 20805 21127 20858 20839 20886 20942 20915 21168 20503 21115 20839 20952 20860 20886 20836 21073 20752 21191 20480 21241 20592 21166 20686 21111 20834 20880 20764 21056 20749 21078 20780 21091 20752 21120 20688 21145 20722 21254 20695 21199 20582 21328 20357 21265 20465 21216 20578 21090 20469 21168 20533 20969 20554 21180 20528 21008 20717 21099 20720 21015 20687 20996 20688 20981 20480 20983 20504 21254 20572 21172 20736 21030 20522 21113 20720 20872 20681 20816 20591 21159 20544 21052 20502 21010 20758 20948 20600 20924 20633 21113 20521 20992 20530 20975 20909 20958 20749 21145 20704 20944 20596 20839 20961 20789 20664 21225 20552 20842 21072 20875 20718 21324 20839 20827 21015 21060 20680 21229 20667 20808 21024 20766 20637 21304 20468 21016 21032 20564 20980 20923 20854 20960 21098 20710 20893 20896 20918 20717 21008 20994 20716 20858 21161 20529 21043 20775 20993 20686 21094 20760 21112 20887 21271 20533 21082 20803 21105 20452 21232 20850 20955 20654 21199 20784 20937 20588 21256 20601 21223 20786 21281 20551 21081 20789 21294 20469 21063 20806 21153 20504 21115 20749 21263 20439 21166 20505 21261 20531 21029 20610 21161 20561 21020 20668 21177 20556 21013 20490 21179 20609 21206 20541 21219 20699 21118 20622 21099 20723 21021 20544 20946 20672 21157 20881 21020 20637 21200 20747 21126 20635 21033 20759 20977 20681 21111 20706 21170 20430 20939 20778 21287 20966 20807 20609 20966 20923 21175 20567 20666 20576 21084 21031 11558 13205 14202 14685 15415 15137 18423 18611 19036 21021 20965 20487 20711 20623 21009 20667 20524 20858 20911 21061 20839 20691 20760 21057 20890 21027 18460 17891 20064 20098 19806 20129 19723 20040 19688 20139 21100 21089 20617 21061 20760 21205 20873 21085 20577 20987 20864 21237 20819 21180 20514 20996 20896 20432 20232 20672 19989 20602 20128 20736 20245 20703 19975 21046 20661 21195 20737 21273 20640 20868 20531 21305 20593 21103 20792 21088 20750 21060 20675 20975 20423 21019 20200 20864 20277 20730 20269 20785 20442 23451 20573 21084 20619 21056 20849 21143 20492 21501 20675 21010 20672 21229 20761 20908 20620 21076 20641 20915 20674 21079 20388 20897 20480 20959 20755 20985 20885 20727 20761 20887 20637 21066 21120 21144 20600 21136 20599 20807 20681 21161 21160 21031 20524 20209 20647 20857 20743 21284 21111 20503 20968 20744 21090 20975 21091 20986 20969 20649 20738 20773 21033 20919 21047 20839 20839 20567 21066 20885 21079 20891 21193 20635 20957 20665 21102 20853 21271 20776 21063 20553 20972 20824 21184 20796 21237 20707 20944 20757 21158 20866 21289 20772 21302 20519 21047 20641 21217 20807 21216 20712 20922 20491 21165 20759 21250 20792 21238 20644 21123 20701 21143 20679 21303 20663 21160 20603 21175 20620 21208 20818 21121 20820 21007 20637 21064 20721 20953 20538 20957 20663 21088 20861 21198 20641 20963 20698 21045 20922 21079 20551 20988 20773 21002 20782 21066 20588 21034 20723 21239 20745 20912 20727 21043 20771 21085 20793 21186 20537 20871 20912 20977 20672 20940 20999 20896 20763 21135 20736 21275 20577 20939 21096 20262 20739 21102 20739 21248 20667 20985 21105 20745 21112 20584 21079 20911 20999 20918 20889 20848 21024 20709 21125 20891 21018 20992 20842 20963 21165 20740 21191 20598 21171 20824 21024 20944 21066 20888 20987 20704 21210 20678 21264 20548 21303 20637 21190 20806 21072 20841 20952 20825 21072 20696 21273 20591 21256 20541 21194 20788 21113 20856 20939 20832 21259 20761 21319 20691 21062 20711 21069 20577 21175 20756 21242 20827 21017 20754 20981 20536 21228 20672 21106 20794 21073 20623 21293 20680 21165 20804 21015 20576 21060 20608 21092 20700 21023 20725 21084 20649 20989 20892 21024 20674 21152 20608 21056 20840 21163 20766 21123 20712 20946 20999 20796 20742 21101 20807 20836 20736 21200 20967 21053 20987 20833 20648 21063 20955 20193 20697 21300 20736 20873 20960 21061 20645 20919 21182 20705 20700 21040 21010 20340 21195 20942 20762 20787 21185 20971 20836 20877 21047 20792 20907 21063 21077 20743 20935 21025 21101 20557 20986 20885 21112 20599 21184 20952 21057 20793 21190 20839 21097 20636 21084 20840 21150 20529 21128 20903 21259 20580 21076 20899 21290 20648 21114 20823 21216 20804 21017 20602 21308 20867 21120 20647 21232 20849 21224 20520 21133 20886 21306 20695 21186 20551 21040 20701 21099 20805 21127 20661 21255 20538 21048 20706 21072 20801 21107 20631 21199 20643 21312 20608 21069 20721 21128 20807 21221 20650 21144 20706 21120 20752 20974 20681 21128 20789 21153 20600 20980 20779 21160 20809 20986 21019 21109 7519 14631 15113 15626 15667 16312 16266 16852 16616 16627 24428 22390 21615 21936 21477 6863 16960 18084 18183 18774 18665 18510 18575 18738 18774 25936 22282 21728 21344 21580 21432 18707 19521 19566 19655 19861 19879 21041 20446 20244 21614 21033 21175 21053 21072 20757 20376 20420 20914 20628 20737 20620 20520 20600 20621 20729 21205 21029 21049 20648 20848 20481 21045 20823 21088 20638 21121 20706 21004 20800 21088 20800 21112 20737 21224 20875 21210 20709 20855 20712 21196 20943 21335 20840 21063 20859 21058 20903 21239 20864 21137 20567 21159 20749 21376 20842 21273 20769 20952 20695 21233 20849 21301 20859 20982 20465 21120 20816 21324 20821 21298 20736 21159 20702 21220 20701 21181 20879 21219 21021 21058 20605 21095 20908 21307 20616 21357 20453 21131 20683 21322 20857 21113 20613 21107 20538 21191 20825 21126 20731 21039 20649 21136 20909 21239 20598 21088 20729 21029 20760 21248 20723 21200 20701 21115 20788 21201 20825 21057 20565 20998 20864 21136 20941 21190 20595 21140 20694 21101 20751 21307 20957 20869 20492 20969 20846 21104 21121 21175 20633 20842 20711 21030 20772 21162 
39472 37430 36616 36489 36384 40420 35718 37495 39280 35637 33774 39315 37921 39348 35101 42001 35186 36240 35752 41040 36134 36369 38002 40281 39949 36672 39686 33711 38456 37289 37576 37728 38953 36688 37597 36480 39628 38253 35932 36936 39010 37070 40502 38480 39513 34042 36449 38305 38991 34663 40411 37802 38016 34691 40134 37315 35985 35526 39984 37834 37807 37109 40499 35839 38087 36012 37561 36231 40370 34710 39204 34092 41604 36156 40386 34789 40908 33947 39831 34401 39688 36900 38592 36891 40280 32621 40832 35875 38056 36570 40012 33367 40694 36334 36761 35897 41465 34276 40088 36837 39991 32855 40241 36544 37485 35607 40339 34135 39412 36483 38312 34803 40288 39047 39622 39510 41504 38965 42752 37080 33361 36427 42928 36711 43041 39555 41440 40325 41040 39692 42184 38709 43071 37458 42470 36834 33574 39020 42054 39121 41211 39436 34459 34018 34180 38186 41920 38753 40914 37841 33735 37337 33090 37335 32586 38580 42544 37800 34235 37846 42503 39892 42715 39100 41877 39121 34293 38680 32876 39100 42445 37999 33472 36150 33569 37184 41862 39175 42117 37560 34103 37413 41664 39818 17846 28932 29994 30296 23600 30315 26216 25386 24951 49408 36644 42612 38882 40138 42784 38389 42163 37320 41074 39176 40679 37952 42828 35969 40345 38120 41067 37112 40792 37972 40602 37332 32815 39157 40646 38876 39872 38044 42100 38491 41243 38952 43193 38570 41633 40064 40496 37648 41853 40333 35614 38675 33764 36256 40216 39755 42432 38274 40808 41450 40291 39365 42675 39942 40682 38762 43020 37496 39955 40538 35673 38400 40682 41133 42885 39638 41384 43264 40922 38054 42416 43226 40146 38791 42450 43322 40742 38984 43074 41447 40052 39795 34256 39516 40368 39696 35288 39078 40487 39608 35031 38640 40484 40216 35344 38851 41472 41757 41339 40438 41069 34009 41888 40352 40264 34432 41255 40644 39696 33892 41539 41232 40452 33377 41557 40761 40320 33253 42768 42729 40176 33577 41193 42180 37994 41836 41344 34594 38661 33348 41927 34264 39272 36996 41100 33671 41048 41913 41024 34583 40787 40928 39978 34524 41578 33016 38151 33491 40889 33710 37956 33507 41359 34112 37941 32732 40697 34148 39991 33031 41313 33613 40230 41808 40112 35233 40588 33920 40336 34401 40339 34867 36786 33468 40580 35840 38375 41275 41016 35488 39937 27764 30139 31785 36484 36320 34848 33968 34481 29184 36176 37198 33921 39624 43040 33648 39981 35643 40557 42784 36903 34816 39750 34451 36707 33415 38488 34664 39041 33963 37712 42958 34953 40292 35360 40024 34892 41936 35392 40469 36460 40663 37124 41629 36064 40704 38092 40948 34769 39936 34465 42779 36055 40503 36014 41266 35937 39977 34128 39794 36486 41562 35009 39398 35491 41232 37208 39775 36248 40392 37013 41752 36323 38812 35419 40464 37580 38168 35232 38852 37073 40492 37728 40593 36074 41804 37190 40288 36253 38405 37302 38934 35093 39394 36000 40406 34148 39416 36872 41305 35098 39559 36440 40913 34024 38612 38407 39492 35536 39925 38656 38075 37038 41012 37576 38615 37158 40501 36339 39863 39928 37579 35744 38389 40305 37691 36448 41072 37521 37621 36348 41346 36896 37376 41031 38499 35930 41514 37752 37498 40332 39425 36535 40016 35940 39989 34513 37754 38704 37253 40919 37256 41040 37043 37297 37606 39664 38455 38400 39266 37576 37441 35239 38505 38402 38765 39137 37289 40324 37860 40802 36172 40375 36064 40353 35800 40243 34626 39078 37414 40536 35899 40248 36235 39930 35189 39456 34952 40448 35456 41306 36040 40552 37771 33504 38694 33208 39593 32875 40362 32712 40084 34378 37753 39472 35655 40440 35208 39660 32619 40005 34344 39972 37047 39416 36868 37143 37350 40309 35060 41367 38944 40896 33732 41013 36587 39181 35429 39029 36296 40980 36648 40577 34688 39808 36588 37706 37585 40379 35004 40342 32778 39841 37105 38640 36593 40877 34552 40782 35109 39672 34712 40711 33732 39595 33648 38944 35512 38971 34909 39833 34071 38312 35473 40909 34323 39117 35895 39750 33596 40847 33745 39816 35303 40924 34183 40110 36595 39365 34067 39545 36065 39997 34978 40896 36077 39256 35004 40448 32981 37432 33794 39485 34273 38664 35140 41121 34478 37961 34791 40224 35072 39398 34752 39848 36887 39121 35307 40119 33054 39216 35264 39201 34842 39313 35235 40525 33517 36717 34952 40196 32468 36789 35984 40336 35207 37792 35104 39984 34521 36289 34720 38996 36333 39280 36026 39712 38631 38775 33653 36432 38868 36474 33862 36617 37588 40064 33392 35432 35104 39840 38245 35965 32849 35776 38898 38759 36826 37223 35560 40360 36344 36269 37792 38761 37434 36321 35859 35587 39463 36412 38199 35432 37703 36996 38939 37560 36277 36027 38288 37388 38752 36622 35809 42182 36341 33857 35547 42161 35184 41872 36170 32721 35928 34912 37040 33677 38644 36184 38553 34000 37402 34648 39653 35394 39836 34713 36124 34823 40800 36874 40235 35523 35996 33452 38883 36033 39558 35861 39052 34670 38491 35409 40120 35047 38912 33124 36624 33338 40775 35142 40173 33921 37160 34147 40000 35463 40137 35846 38389 32109 37853 35559 40340 36432 40436 33248 36512 33004 40385 33191 39076 34080 38903 42669 38672 32681 37413 33166 39202 34199 36274 41304 37713 33832 38032 33413 39123 34460 37650 34501 36746 33087 37888 34200 40324 35163 38388 41882 38189 33345 36919 33932 38643 35020 38123 42569 37798 34528 39080 34738 39830 35016 37188 33337 36076 33961 37921 33822 39643 36448 37786 33129 37214 32560 37868 34359 37640 35302 38912 35736 39115 32087 36462 33062 37200 35169 38246 34855 39840 37266 37351 32896 34790 32769 37680 34880 37984 38736 41472 36699 36685 32092 36697 32651 36459 34774 38450 38789 40183 36387 34560 33302 34503 33602 35328 34237 36849 39101 40597 37864 36629 33496 35099 38392 36877 39078 36802 38187 35569 38713 35513 34832 37594 36268 37461 38034 36408 37504 37314 37620 34564 33992 34716 37561 36534 38056 36766 37344 34769 37456 33734 34695 41984 33812 35241 38146 36704 38486 35544 37959 34888 38550 33490 37504 34057 38201 35495 39133 34048 38912 35405 37944 32072 36147 33559 38189 34313 39062 35157 40417 35054 39872 34665 37767 42288 37121 33671 38584 35224 40468 35160 39360 35645 39173 32185 36357 32297 38656 33856 40092 33441 38617 34233 40564 35896 38841 31900 41958 42361 37565 32859 38912 36487 40864 35296 37946 32709 38282 33095 38864 33553 39015 34256 37596 37813 38624 33223 38498 34918 37505 33204 37288 33102 38855 35942 36832 33931 39015 35243 36744 33985 37927 34419 36754 32658 38536 34867 37303 34176 38699 33888 38295 35998 37189 32280 36352 34564 37760 34940 36835 33776 37348 33160 37175 33904 40151 32827 38950 34407 37360 33239 36232 36944 36006 38189 36983 34159 37512 34448 39913 34830 34759 37027 35936 37440 35765 33424 40064 34471 36291 39369 37655 33548 36711 37740 42380 39587 35600 35247 36439 38252 33671 38884 36620 36697 35322 38760 35141 37585 36427 36293 37195 38642 35653 39092 36356 36088 36416 37211 36829 39373 32340 38948 36197 37143 36316 36437 35866 38389 34805 39808 31720 40202 33243 39466 34539 38987 35944 36146 35072 38029 35049 38497 35372 38673 34817 38679 34240 39173 34785 40192 34677 40015 33280 40828 41503 40562 42674 40215 33147 38467 42720 39633 32676 37302 32768 39533 32388 37342 34855 38853 34667 37828 34576 37386 34185 37544 31616 37492 32061 40049 33185 39348 34631 37910 32405 38833 34657 36096 34233 35432 33397 39380 32555 38112 32141 37440 35019 37033 33316 36780 33671 38887 32460 37138 32375 37539 36892 37431 35035 39199 34473 36853 33239 35945 37241 35431 33920 40098 32810 35885 38276 36476 34835 41032 36292 35939 37883 38286 34219 40260 34365 35415 37680 35264 33748 40672 42736 38016 38016 32852 37344 37044 36209 37137 38848 34704 36577 36374 36839 34830 37458 37472 34786 36164 39450 32497 37985 35377 37380 34439 38669 35029 38817 36644 40599 32704 38453 35616 38785 42422 40376 36217 37366 34049 39974 35282 37006 33244 40064 33562 40104 35408 40475 32980 38472 35490 40836 42832 38768 35684 39237 32136 38935 35084 40528 42549 39896 32304 40284 32631 37817 33280 39320 32880 37730 34176 39565 32928 37636 31940 39564 33360 39818 32893 39957 34733 39081 33706 38800 34898 37921 32488 36874 33947 39287 36381 37888 33875 39585 35072 38952 33888 37934 35168 37396 34294 38976 34572 39374 42379 37443 35296 40715 37596 35733 33193 37256 37055 39744 33191 33920 32727 38485 38171 29909 36397 37553 32590 30080 36793 41226 32905 37200 38041 37464 32021 34519 33600 37512 34231 32263 36053 36928 38383 36176 34354 34827 38150 36555 37963 30918 35200 38101 38612 35763 38907 34719 37877 34292 39138 38979 38732 33530 38181 35015 39908 36437 38784 33066 37634 36017 40344 35910 39685 32288 37288 36409 41952 40136 34093 37345 33437 38681 34608 40064 34908 37287 38236 34101 39840 34780 40451 33712 35983 32432 40720 33388 38951 35457 38445 35041 38184 34233 37621 42198 38209 39853 36123 40528 35063 40480 35428 42221 43895 33518 38531 33640 37975 36108 39304 32081 42808 34441 37553 33984 40251 35213 36672 33482 38315 33738 36685 34048 38560 41676 36716 31584 37305 34985 37600 36484 34935 34989 36468 33810 38288 38839 39257 33418 38768 33572 35558 34212 39361 39489 38228 32480 39840 34073 36138 34873 40480 39259 32312 37153 34738 38533 37815 38803 37767 37528 33904 34528 35095 37992 37019 38340 36176 36085 33024 38260 36508 38680 36704 39844 33913 37314 34114 38871 36295 40582 35312 38428 32817 37344 35765 39477 35631 40331 34741 36873 34995 39340 36199 40724 35266 40813 32601 38121 33728 39896 35840 39880 34712 36812 32040 39424 35244 40060 35510 40320 33859 38827 34738 39251 34436 40882 34332 39244 33649 39596 33623 39777 35771 38825 35712 37873 33879 38185 34752 37190 32626 37239 34166 38400 36487 39960 33824 37256 34498 38112 36963 38695 32912 37543 35242 37576 35448 38360 33285 37914 34852 40396 34999 36481 34969 38088 35219 38704 35570 39572 32709 36176 36577 37457 33973 36968 37719 36423 35165 39264 34640 40552 33165 37024 38731 40569 34932 38887 34851 39936 34357 37575 38869 34934 38845 33163 38534 37047 37730 36896 36501 35936 37708 34663 38935 36712 37864 37389 36073 37356 39665 34801 39810 33495 39446 35853 37705 37009 38443 36452 37791 34408 39927 34344 40112 32736 40800 33996 39664 35701 38280 36119 37156 35872 38274 34439 40434 33642 40083 32884 39665 35427 38976 36256 37160 35759 40404 35193 41092 34571 38288 34816 38483 33068 39571 34994 40353 36120 37837 34896 37540 32501 40072 34108 38696 35553 38372 33793 40737 34328 39522 35590 37872 32918 38072 33191 38496 34594 38034 34897 38573 33964 37712 36584 37735 34101 39032 33232 37952 35992 39520 35336 38924 34666 36982 37730 35549 34737 38888 35792 35840 34490 39605 37635 38461 37874 35881 33731 38345 37456 39884 34625 40671 34695 36208 37153 38381 33896 36836 39840 34615 34422 37844 37696 41344 40168 37377 35083 35298 39592 37708 35943 36410 38303 35421 36761 38485 38664 34977 37059 37863 39040 33024 37514 36480 38913 33568 39378 37280 38257 35514 39729 36234 38816 33816 38546 36016 39401 32489 38784 36845 40461 33191 38312 36678 40728 33932 38904 36008 39889 35607 37803 33459 40813 36385 38745 34035 39992 36198 40112 32412 39036 36544 40929 34725 39531 32946 37776 34685 38834 35664 39097 34148 40273 32743 37977 34535 38216 35504 38874 33818 39964 33927 40640 33312 38432 34768 38880 35808 40124 34026 39058 34569 38665 34819 37529 34301 38855 35513 39222 33409 37361 35414 39308 35754 37633 37944 39037 28055 31529 36673 32433 32768 39481 39379 34297 31523 31751 43688 42928 34745 37504 42793 31207 34965 37280 38480 34563 33280 31424 32148 33740 34355 39070 41408 35559 41124 33988 41888 34001 32096 32777 33793 36008 36416 38041 42510 40304 34505 37962 39789 38552 38405 35066 41376 42164 36951 33501 34491 33367 32064 33013 33418 34740 39892 38144 38336 33831 35862 31626 37978 35954 38481 33891 38727 34561 37603 35356 38449 35399 38857 34728 40033 36548 40039 34767 36247 34537 39776 37465 41396 36140 38464 36416 38209 36832 40491 36146 39051 33146 39371 35114 41286 36250 40522 35212 37106 34547 40128 36207 40869 36552 37608 42538 39028 35649 41079 35993 40692 34689 39451 34748 39975 34784 39751 36691 40129 38118 38286 33649 38745 36827 41048 33528 41433 42683 39462 34509 40978 36443 39035 33504 38792 32672 39702 35977 38982 35106 38248 33940 38833 36945 40492 33536 38370 34979 37921 34994 39936 34944 39620 34763 39052 35410 39780 35986 38184 33003 37440 36016 38935 37330 39808 33450 38917 34528 38882 35210 40969 37624 36272 31991 37255 36224 38694 38976 39835 33814 35936 34709 37901 35148 39401 
23111 22680 22769 22539 23030 22781 22694 22733 23201 22639 22778 22957 22881 22601 22808 23143 22772 22632 22897 22881 22749 22738 23147 22675 22643 22679 22805 22929 22893 22999 22659 22889 22807 23036 22400 22967 22809 22967 22739 23043 22829 22687 22677 23031 22848 22857 22736 22980 22720 22563 22826 23015 22481 23008 22800 23042 22515 23071 22804 23043 22505 23029 22801 22732 22657 23076 22393 23108 22735 23001 22748 22918 22749 22823 22682 22986 22669 22988 22680 23062 22419 23136 22576 22976 22727 23060 22638 23119 22441 23031 22734 22991 22459 23128 22564 22853 22609 23196 22343 23047 22619 22992 22481 23168 22638 22801 22729 23191 22512 23157 22775 22871 22658 23236 22476 23046 22595 23024 22373 23146 22493 23403 22599 23015 22397 22855 22602 22996 22565 23097 22529 22869 22336 23099 22568 22952 22084 22951 22552 23131 22570 22980 22339 22991 22403 22934 22556 22871 22319 24529 23978 24531 24148 24529 24167 24670 24258 24407 24196 24384 24137 24393 24197 24540 24175 24427 24189 24449 24071 24576 24032 24545 24002 24558 24185 24424 24012 24617 23955 24517 24192 24400 24011 55 16494 19211 19456 20314 20102 20783 20631 21131 20855 31618 27300 26807 26080 25880 25313 25582 24964 25255 24856 25132 24661 25020 24786 24724 24475 24892 24448 24865 24516 24615 24338 24697 24473 24673 24356 24749 24384 24649 24447 24549 24240 24656 24316 24576 24336 24740 24224 24472 24459 24437 24234 24497 24425 24455 24362 24695 24127 24476 24421 24557 24215 24578 24600 24302 24237 24426 24489 24281 24308 24600 24502 24741 24256 24792 24253 24324 24271 24704 24114 24397 24403 24680 24381 24375 24510 24551 24497 24392 24561 24290 24124 24341 24596 24230 24167 24376 24579 24106 24209 24432 24467 24343 24147 24361 24391 24175 24535 24314 24252 24133 24519 24253 24445 23908 24509 24231 24468 23908 24468 24260 24452 24011 24328 24304 24453 24039 24306 24276 24534 24143 23708 24414 24464 24215 24430 24253 24503 24192 24161 24157 24583 24216 24323 24064 24593 24230 24408 24028 24495 24203 24530 23976 24398 24175 24552 23945 24416 24245 24640 24120 24279 24107 24545 24192 24237 24023 24650 24220 24365 24039 24629 24184 24461 24012 24440 24156 24593 23974 23906 24124 24597 24095 24420 24015 24590 24068 24306 23974 24626 24037 24476 15949 20399 20676 21473 21049 21720 21495 22006 21607 21767 27514 26691 25670 25669 24832 25350 24872 25189 24439 24926 24623 24988 24320 24592 24148 24800 24388 24677 24144 24612 24151 24297 23695 24196 23770 24232 23800 24185 23633 24179 23899 24167 23694 24059 23589 24285 23599 24129 23570 24130 23675 24032 23498 24085 23696 24208 23712 24121 23590 24148 23662 23897 23540 24008 23724 24081 23684 23911 23610 24073 23655 23965 23527 23897 23688 23986 23829 23945 23594 24140 23673 24064 23590 23949 23681 23862 23509 23976 23577 24023 23444 23755 23495 23980 23580 23856 23503 23767 23648 23791 23449 23789 23717 23813 23544 23975 23514 23746 23606 23896 23360 23798 23833 23656 23551 23878 23732 23731 23572 24117 23432 23727 23754 23936 23402 23669 23970 23635 23469 23824 23740 23561 23603 23943 24040 23680 23829 23627 23543 23980 23387 23828 23447 23584 23878 23797 23620 23502 23511 23826 23656 23547 23920 23526 23904 23315 23824 23396 23939 23533 23883 23431 23749 23680 23569 23632 23482 23715 23532 23645 23658 23683 23207 23579 23675 23616 23715 23570 23815 23599 23828 23553 23889 23494 23849 23462 23773 23416 23719 23489 23732 22528 22826 22780 22946 22891 22967 22939 23166 22688 23197 23161 23968 23171 23920 23490 23830 23495 23719 23412 23568 23496 23803 23305 23892 23061 23947 23132 23911 23296 23695 23360 23608 23398 23808 23223 23911 23068 23917 23280 23668 23393 23635 23385 23778 23191 23808 23132 23768 23400 23658 23397 23831 23163 23861 23205 23832 23175 23521 23111 23772 23106 23703 23280 23611 23152 23784 23239 23792 23361 23542 23182 23651 23208 23568 23245 23756 23140 23682 23201 23648 23144 23770 23088 23575 23145 23812 23106 23556 23186 23672 23120 23566 23328 23499 23092 23498 23255 23387 23139 23616 23315 23424 23201 23610 23241 23396 23207 23683 23286 23495 23159 23606 23207 23524 23223 23636 23266 23601 23221 23645 23205 23734 23158 23505 23253 23572 23113 23558 23404 23351 23137 23552 23463 23320 23175 23480 23501 23277 23101 23329 23449 23371 23179 23371 23633 23579 23240 23298 23345 23614 23020 23281 23205 23610 23377 23320 23087 23378 23606 23427 23088 23229 23195 23641 23324 23308 23200 23420 23594 23296 22705 23367 23484 23347 23349 23216 23453 23230 23644 23104 23721 23249 23554 23360 23463 23114 23334 23405 23540 23360 23356 23004 23009 23072 23162 22835 22891 22868 23125 22978 23284 23909 23362 22868 23357 23232 23584 23280 23413 23065 23474 23288 23601 23180 23397 23013 23472 23191 23525 23089 23465 22807 23414 23177 23664 23206 23573 22908 23303 23040 23625 23136 23579 23052 23396 22827 23565 23127 23637 23078 23476 22845 23472 23136 23567 23129 23527 22981 23340 22946 23605 23164 23696 23133 23411 22933 23496 22958 23643 22997 23550 22944 23485 22912 23409 22951 23470 23111 23495 22871 23429 23030 23497 23004 23480 23065 23597 22769 23870 22775 23415 23001 23520 23093 23553 22791 23521 22857 23350 22894 23489 23106 23418 22927 23364 22944 23460 22992 23373 23128 23461 22917 23392 22944 23324 23008 23414 23174 23455 23101 23269 23063 23264 22925 23367 23031 23220 23088 23456 22977 23106 23069 23120 22936 23321 23081 23288 23305 23411 23119 22995 22896 23098 23011 23287 23106 23642 23353 23447 22923 23215 22936 23028 22919 23255 23217 23500 23380 23225 22921 23056 22973 22978 22953 23135 23166 23469 23370 23279 22965 22980 23396 23142 23296 23190 23361 23011 23424 23180 23174 22937 23409 23002 23288 23178 23277 23168 23248 23092 23160 22845 23329 23006 23005 22976 23271 22967 23304 22905 23202 22734 23011 22699 23317 23095 23460 23088 23388 23032 23411 22967 23209 23028 23296 22918 23467 23076 23419 23008 23461 22972 23269 22795 23426 22872 23424 23005 23531 23002 23503 22905 23409 22754 23174 22853 23229 22855 23415 23009 23424 22994 23376 22892 23228 22610 23465 22855 23448 22800 23504 22815 23375 22880 23415 22760 23120 22820 23230 22900 23322 22934 23425 22990 23374 22720 23145 22696 23282 22708 23277 22903 23364 22777 23320 22768 23252 22928 23413 22775 23201 22829 23222 22930 23284 22873 23228 22884 23395 22862 23084 22848 23332 22754 23256 22976 23132 22818 23234 22768 23178 22950 23150 23002 23010 22890 23008 22969 22903 22964 23159 23064 23177 23208 23148 23021 23180 22890 23099 22887 23351 22821 23427 22876 23047 23009 23457 23360 22944 22879 23191 22829 23312 22918 22908 23297 23010 22938 23388 22800 23171 23136 22949 23192 23000 23118 22904 23411 22816 23187 23026 23194 22901 23303 23067 22935 23045 23175 22693 23217 23076 22995 23075 23319 22694 23413 22820 23228 23141 23025 22922 23204 22823 23260 22660 23372 22810 23224 23026 23125 23009 23179 22855 23360 22799 23365 22582 23449 23214 23431 22694 23321 22862 23347 22904 23211 22873 23143 22863 23031 22980 23124 22911 23052 22815 23338 22856 23223 22802 23190 22740 23245 22869 23144 22823 23415 22780 23181 22919 23284 22584 23156 22752 23349 22674 23458 22566 23321 22776 23177 22704 23178 22873 23149 22805 23272 22689 23175 22742 23190 22762 23160 22723 23108 22839 23282 22806 23025 22710 23209 22779 23182 22786 23137 22877 23103 22875 23368 22765 23173 22917 23046 22953 22825 22862 23323 22948 23040 23168 22934 22746 23239 22738 23053 23103 22832 22920 23232 22752 23081 23087 22969 22801 23300 23174 22921 23209 22688 23189 22920 22832 23089 23208 22705 23205 23010 22831 22982 23189 22746 23034 23031 23031 22845 23277 22879 22950 22877 23292 22616 23211 22958 23111 22742 23300 22849 23030 22806 23324 22747 23248 22951 23283 22595 23142 22875 23252 22476 23334 22804 23189 22673 23392 22784 23056 22690 23293 22851 23040 22807 23252 22836 23118 22790 23286 22720 23100 22577 23264 22745 23107 22592 23142 22835 23127 22656 23080 22814 22973 22604 23118 22737 23128 22601 23177 22782 23221 22659 23196 22575 23200 22804 23067 22697 23242 22744 23065 22636 23020 22820 23032 22610 23100 22775 23215 22672 23005 22809 23276 22872 23012 22704 23047 22917 23127 22783 22920 22817 23210 22976 23027 22694 22889 23013 18831 15353 16777 17346 18122 18356 18327 22183 22041 21897 24394 23822 23900 23482 23552 23744 23319 23427 23162 23671 23356 23447 23015 23348 23340 23433 23300 21189 20372 22230 22119 22383 22069 22151 22051 22247 22092 23641 23187 23303 23063 23536 23228 23596 23040 23155 22955 23543 23083 23521 22901 23293 22907 23490 22126 22748 22181 22464 22079 22747 22308 22716 22191 24165 22743 23291 23057 23437 22892 23290 22631 23378 22679 23284 22963 23364 22644 23371 22714 23169 22808 22890 22361 22808 22257 22798 22258 22748 22427 22899 22755 23184 22724 23193 22784 23332 22799 23088 22829 23104 22745 23164 22885 23239 22704 23182 22749 22767 22650 23102 22521 22775 22560 22833 22628 22969 22876 23125 22561 22763 22798 23087 23048 23373 23015 22876 23197 22833 22796 22967 23059 23327 22958 22976 22674 22833 22851 23015 23191 23015 22794 22759 23043 22902 23275 22888 23246 22840 22830 22804 23037 22993 23185 23026 23049 22660 22361 22753 23229 22958 23217 22787 22898 22752 22998 22900 23226 22804 23201 22681 22938 22758 23240 22871 23303 22792 23136 22480 23093 22756 23293 22765 23305 22688 23056 22685 23126 22823 23224 22784 23170 22453 22605 22639 23304 22560 23250 22745 23050 22611 23131 22602 23162 22664 23043 22557 23104 22592 23075 22656 23155 22531 23123 22546 23100 22665 23219 22535 22469 22567 23065 22631 23149 22695 22981 22659 23013 22672 23174 22727 22971 22621 23071 22666 23228 22592 22917 22754 23100 22901 22957 22629 22993 23008 22904 22711 22953 22995 22843 22788 23255 22668 22740 22944 22893 22626 23180 22664 22914 23153 22661 22840 23098 22614 23107 22700 22759 23155 22703 23016 22784 23123 22793 22945 22956 22900 22807 23101 22692 23117 22876 22889 22841 22817 22785 23127 22658 23177 22605 23072 22818 22865 22899 23040 22850 23118 22567 23155 22465 23242 22680 23135 22780 23348 22761 22908 22845 23118 22701 23213 22551 23289 22369 23344 22665 23080 22742 22917 22829 23108 22626 23209 22741 23272 22557 23015 22508 23096 22589 23224 22579 23128 22772 23041 22567 23034 22605 23143 22556 23155 22712 23127 22519 23096 22482 23025 22496 22941 22659 22963 22613 23110 22513 22951 22790 22875 22618 23123 22567 22984 22705 22999 22647 22999 22581 22929 22601 23159 22555 23010 22694 23105 22707 23157 22656 22929 22929 22759 22635 22959 22822 22809 22741 23129 22606 22755 23034 22884 22668 22880 23051 22855 22692 23211 22661 22667 22649 23119 22631 22794 22912 22792 23026 22866 22978 22464 23062 22776 22992 22578 23078 22888 22734 22721 23108 22865 22704 22731 23076 22784 22752 22744 23052 22713 22884 22780 23151 22759 23040 22896 23172 22624 23064 22735 23132 22633 22817 22687 23108 22705 22821 22617 23152 22727 22876 22529 23209 22679 23092 22464 23062 22672 23186 22498 22981 22752 23208 22573 22913 22601 23135 22631 22962 21883 23206 22521 23208 22538 23046 22550 23069 22669 22909 22503 22980 22584 23107 22395 22939 22507 23010 22609 22891 22391 22933 22469 23092 22455 22602 22519 23012 22732 23104 22519 22896 22564 23031 22740 22913 22494 22882 22632 23128 22487 22883 22593 13383 15923 17080 17117 17816 17831 18405 18446 18581 38594 28639 26896 26296 25787 25344 16610 19269 19915 20333 20670 20825 20375 20571 20673 20854 28656 26498 25849 25350 25157 14977 20723 21396 21316 21618 21685 21903 22707 22614 22324 23223 23552 23265 23497 23063 23191 22344 22677 22717 22837 22598 22672 22325 23126 22505 23362 23056 23335 22991 23014 22925 22933 22711 22981 22606 22733 22960 22928 22677 23016 22580 23001 22605 23162 22899 23306 22976 23105 22656 23129 22831 23222 22807 23207 22562 22932 22766 23319 22845 23308 22637 23106 22609 23243 22781 23270 22757 23130 22481 23142 22711 23254 22839 23220 22559 22928 22555 23252 22721 23280 22756 23132 22489 23052 22596 23115 22700 23269 22472 23033 22532 23096 22742 23211 22720 22963 22568 23100 22513 23131 22614 23063 22609 22977 22576 23064 22663 23213 22520 23193 22560 23070 22641 23144 22776 22855 22629 23024 22651 23060 22757 22967 22633 22944 22643 23005 22733 23074 22476 22965 22573 22980 22681 23089 22640 22863 21957 22902 22704 22919 22913 23083 22503 22846 22596 22947 22807 23114 22838 22720 22790 22747 22679 22881 22960 
21843 22161 21633 22397 21949 22249 21733 22497 21832 22312 21940 22550 21549 22453 21653 22503 21496 22328 21673 22535 21779 22411 21747 22169 21539 22286 21843 22219 21724 22359 21638 22314 21798 22656 21614 22400 21576 22471 21524 22310 21669 22304 21583 22315 21856 22352 21595 22404 21831 22355 21751 22393 21564 22249 21701 22457 21600 22288 21809 22365 21939 22301 21945 22232 21712 22476 21465 22327 21899 22256 21790 22149 21884 22521 21831 22456 21928 22282 21692 22241 21553 22475 21677 22115 22073 22104 21579 22370 21649 21979 22149 22183 21660 22451 21704 22098 22177 22234 21591 22234 22083 22159 21669 22596 21813 22161 22232 22073 21648 22400 22005 21997 21895 22305 21629 22019 22298 22050 21708 22572 21975 21915 21733 22459 21774 21962 22213 22264 21664 21872 22342 22061 21699 21764 21901 22072 22114 21751 22139 22034 22455 22028 22421 22073 22196 21894 22027 21819 22177 21961 22090 21769 21863 21774 22106 21953 22133 22039 22152 21959 22193 22030 22258 22139 22488 22128 22409 22091 22400 22051 22488 22146 22442 21926 22320 22057 22262 21907 22047 21841 22231 21736 22255 21658 21926 21669 91 90 83 82 87 0 1217 33888 31950 29766 28216 26232 25849 24420 23806 23073 23094 22150 22130 21767 21739 21055 21549 20923 20866 20765 21092 20130 20842 20377 20580 20121 20720 20086 20446 20112 20592 19655 20554 20096 20171 19792 20426 19748 20327 19875 20454 19595 20186 19851 20381 19636 20448 19791 19925 19738 20422 19595 20540 19777 20441 19320 20279 19683 20277 19523 20346 19656 20215 19425 20440 19737 20033 19604 20400 19725 19905 19699 20391 19688 20224 19781 20429 19511 20236 19776 20573 19397 20274 19601 20425 19361 20224 19587 20360 19465 20386 19699 20436 19584 20248 19673 20311 19452 20336 19662 20352 20000 20311 19723 20497 19835 20354 19623 20561 19714 20352 19600 20583 19604 20339 19625 20491 19543 20329 19751 20620 19726 20430 19772 20458 19834 20455 19833 20489 20056 20286 19751 20349 19913 20247 19765 20368 19968 20451 19842 20394 19918 20531 19830 20458 20008 20590 19945 20514 19919 20523 20049 20613 19902 20461 20160 20389 19853 20498 20085 20519 19874 20497 20136 20595 19973 20516 20255 20889 20041 20601 20197 20660 20313 20565 20110 20556 20504 20372 20176 20753 20481 20580 214 1514 3656 5943 6359 7615 7863 9038 9463 33880 33478 31148 29175 27676 26005 25255 24352 24509 23221 23105 22721 23088 22528 22178 21849 22186 22180 21767 21328 21638 21673 20271 19185 19332 19169 19953 19385 19272 19739 19584 19649 19195 19549 19425 19704 19364 19331 19305 19761 19513 19623 19223 19575 19666 19646 19275 19584 19564 19666 19561 19484 19112 19616 19608 19747 19377 19475 19474 19875 19522 19614 19364 19964 19614 19920 19273 19829 19424 19978 19596 19629 19440 20051 19508 19862 19127 19927 19682 20104 19497 19798 19356 20057 19589 19874 19404 20013 19584 20039 19291 20069 19617 19957 19273 20208 19560 19744 19448 20220 19456 20561 19655 20295 19156 20160 19591 20080 19408 20401 19505 19935 19605 20215 19367 20021 19744 20189 19321 20226 19656 20099 19476 20345 19510 20167 19636 20296 19540 20480 19608 20117 19524 20085 19470 20392 19428 20164 19351 20214 19591 20330 19769 20343 19574 20141 19488 20339 19488 20467 19485 20432 19492 20324 19456 20234 19534 20326 19580 20010 19692 20323 19792 20316 19763 20329 19792 20311 19874 20308 19817 20309 19767 20266 19789 20265 19826 20394 19876 20395 19983 20315 17938 17380 16844 17463 17107 17699 17309 17933 17489 18287 20624 21167 20266 20903 20246 20717 20301 20715 20285 20590 20099 20629 20045 20800 19943 20624 19828 20577 20000 20393 20360 20403 20096 20383 20001 20759 20068 20448 20167 20396 20646 20448 20171 20803 20068 20704 19954 20428 20699 20707 20160 20880 20046 20686 19989 20258 20630 20316 20169 20809 19942 20448 20617 20421 20130 20800 20355 20538 20480 20085 20766 20568 20247 20439 20746 20327 20574 20509 20577 20098 20793 20496 20277 20376 20632 20480 20471 20615 20717 20352 20571 20596 20718 20181 20714 20466 20611 20021 20853 20457 20586 20490 20867 20505 20746 20171 20989 20544 20663 20380 20939 20469 20680 20209 20952 20525 20760 20349 21084 20569 20802 20837 21099 20517 20797 20128 21072 20343 20948 20304 21005 20473 21094 20154 20972 20498 21111 20075 20951 20493 21115 20169 20897 20631 21239 20300 21061 20446 21173 20499 20690 20369 21239 20555 21077 20244 21120 20429 21207 20320 21082 20202 21066 20531 21191 20353 21082 20355 21094 20359 21127 20421 21116 20577 20953 20400 21185 20442 21290 20274 21311 20231 21105 20428 21157 20284 20919 20359 21162 20528 21180 20402 19961 19201 19847 19306 19865 19509 19774 19337 20065 20613 21306 20795 21339 20776 21336 20939 21307 20784 21216 20657 21340 20821 21208 20601 21175 20723 21233 20778 21405 20403 21144 20691 21200 20771 21358 20589 21192 20688 21239 20893 21303 20881 20900 20603 21042 20804 21221 21239 21062 20526 20871 20757 21207 21164 21542 20748 21104 20593 21046 20827 21476 21090 21026 20790 20924 20832 21193 21242 21440 20805 20933 20736 20960 20758 21316 21278 21016 20975 20977 21176 21099 21335 21083 21280 20917 21008 20715 21184 21169 21309 21081 21139 20912 20886 20856 21159 21165 21270 21113 21417 20906 21030 20917 21242 21024 21384 21114 21292 20904 21090 21166 21429 21166 21488 21120 21467 20968 21370 20752 21357 20920 21440 21072 21610 21070 21560 20984 21345 20644 21324 20866 21563 20992 21661 20951 21613 20848 21491 20627 21594 20782 21701 21056 21625 21012 21533 20864 21266 20733 21443 20903 21643 21001 21672 20960 21497 20688 21345 20800 21557 20753 21581 20896 21597 21033 21728 21004 21534 20817 21717 20948 21513 20932 21536 20751 21678 20903 21481 20679 21269 20683 21536 20795 21576 20996 21827 21095 21623 20727 21479 20827 21015 20544 21221 20599 21259 20780 21412 20681 20997 20433 21564 20968 21479 21047 21681 21084 21715 21165 21486 20949 21512 21001 21597 21079 21656 21095 21820 21162 21490 20839 21687 21020 21356 21086 21453 21177 21656 21387 21664 21232 21276 20955 21357 20822 21209 21084 21493 21351 21735 21421 21289 20937 21305 20961 21278 21157 21397 21213 21799 21479 21803 21107 21252 21491 21280 21660 21440 21504 21385 21469 21122 21329 21339 21438 21508 21529 21494 21489 21235 21266 21328 21675 21440 21685 21344 21321 21136 21689 21364 21789 21138 21435 21261 21757 21253 21321 21243 21653 21218 21520 21351 21767 20940 21744 21365 21512 21369 21664 21261 21871 21132 21853 20935 21799 20984 21819 20266 21898 21062 21878 21255 21775 21295 21561 21326 22105 21305 21747 21162 21964 20964 21921 21133 21785 21288 21592 21256 21814 21120 21805 21255 21992 21127 21748 21220 21752 21066 21834 20981 21606 21232 21632 21049 21888 21039 21903 21209 21762 20928 21994 21081 21664 21249 21796 21221 22021 21161 22054 21305 21863 21049 21870 21032 21793 21178 21711 21323 21773 21108 21666 21230 21921 21221 21697 21241 21745 21286 21644 21255 21714 21103 21744 21110 21879 21142 21923 21385 21730 21269 21510 21262 21562 21381 21459 21465 21397 21543 21451 21669 21515 21770 21521 21735 21443 21688 21342 21859 21481 21835 21430 21760 21506 21595 21656 21778 21175 21813 21255 21914 21339 21773 21561 21627 21624 21746 21611 21363 21677 21614 21531 21746 21131 21892 21239 21921 21495 21635 21613 21386 21574 21862 21297 21987 21132 22022 21401 21829 21432 21716 21474 21981 21326 22062 21355 21862 21392 21861 21284 22088 21030 22185 21349 21959 21479 21913 20583 22055 21357 21833 21482 21931 21292 22130 21221 21963 21208 22009 21217 21936 21395 21761 21244 22003 21063 21888 21383 21961 21180 22155 21191 21904 21382 21873 21196 22130 21165 21842 21186 22011 21239 21788 21441 21889 21265 22033 21309 21897 21398 21836 21181 21845 21511 21866 21285 21975 21388 22085 21352 21989 21104 21788 21431 21965 21308 21771 21621 21655 21255 21777 21705 21511 21415 21947 21905 21735 21446 21969 21797 21592 21424 21975 21725 21885 21386 21972 21730 21550 21338 21714 21794 21480 22058 21682 21691 21242 21778 21724 21783 21312 21740 21718 21856 21431 21771 21895 21833 21581 21688 21693 22039 21520 21616 21505 21957 21853 21837 21338 21753 21682 22048 21408 21911 21365 22248 21486 21971 21194 21911 21648 22157 21402 21962 21349 22260 21496 22039 21301 22069 21518 22195 125 3868 6773 9327 9975 11395 11264 20150 19722 20409 25829 26468 25325 25659 24648 25042 24018 24231 23331 23930 22978 23564 22544 23207 22477 23196 22330 17136 13543 19036 18871 19672 19240 19789 19463 19933 25857 24697 23687 23722 23237 23725 22888 23445 22753 22927 22417 22957 22508 23017 22173 22624 21989 22407 19568 20209 19799 20000 19911 20415 20183 20693 20553 23223 22615 22762 22501 22946 22817 22587 22103 22337 22155 22520 22535 22473 21849 22025 22193 22309 21168 20656 20909 20433 20893 20680 21027 21066 21032 20933 22211 22388 22768 22503 22737 22252 22318 21760 22361 22122 22520 22025 22434 21926 22075 21787 22461 21427 21756 21208 21731 20923 21698 21400 22073 21424 22016 21680 22283 22188 22603 21981 22503 21895 22339 21616 22579 21707 22471 21778 22598 21768 22227 21480 22319 21430 22304 21575 22417 21709 22205 21792 22080 21527 22275 21446 22441 21560 22106 21424 22196 21533 22187 21608 22281 21531 22507 21487 22210 21511 22301 21643 22096 21582 22060 21568 22219 21625 22301 21620 22081 21507 22143 21781 22231 21799 22108 21508 21999 21645 22061 21798 22263 21836 21955 21861 21824 21667 22144 22137 22227 21528 22390 21608 22016 21799 22344 21816 21760 21594 21899 21783 22080 21655 21653 22221 21811 22305 21806 22055 21779 21787 21808 22106 22016 22136 21856 21752 22253 22055 21913 22273 21761 21966 21898 22107 21864 22164 21764 22086 21562 22092 21861 22375 21753 21888 21655 22401 21719 22280 21485 22215 21763 22341 21460 22248 21638 22384 21565 22324 21698 22075 21643 22298 21500 22336 21763 22019 21748 22353 20716 22313 21673 22249 21632 22148 21643 22407 21437 22093 21605 22218 21598 22385 21428 22241 21473 22392 21760 22252 21569 22198 21675 22235 21569 22240 21465 22057 21595 22177 21632 22103 21592 22253 21597 22192 21563 22216 21472 22215 21594 22126 21745 22033 21814 21965 21656 21923 21659 22327 21600 22342 21493 22009 21777 21975 22110 22108 21776 22113 21607 22471 22137 22110 21846 21808 22048 21805 21566 22427 21529 22024 22100 21837 21891 21637 22231 21804 21302 21999 22023 21815 22098 21728 21972 21934 21750 21932 22217 21678 22291 21990 21824 21841 22165 21422 22301 21847 21952 21995 22342 21554 22300 21924 21949 21648 22368 21576 22060 21904 22263 22075 22492 21816 22311 21824 22457 21289 22384 21744 22178 21521 22492 21607 22176 21865 22289 21500 22217 21829 22394 21699 22501 21601 22125 21426 22272 21687 22409 21623 22384 21557 22089 21575 22256 21533 22246 21481 22433 21670 22309 21607 22119 21415 22187 21707 22123 21527 22193 21678 22220 21714 22166 21661 21605 21614 22301 21714 22016 21649 22224 21647 22119 21651 22237 21739 22247 21688 22105 21713 21912 21611 22167 21895 21829 21588 22067 21943 22225 21771 22157 21794 22455 21425 22003 21543 22514 21903 22095 21541 22103 22058 21905 21591 21996 21995 22365 21545 21884 21734 22325 21984 21597 22119 21969 22206 21907 21828 21777 22268 22025 21975 21719 21985 22104 22101 22002 21815 22418 22185 22001 22283 21760 22011 21847 22408 21972 22182 21556 22087 21921 22341 21831 22007 21647 22370 2069 7305 9054 10737 11415 12993 12871 13819 13472 43584 43061 38758 34444 32732 30056 6173 9876 13308 14127 15860 15856 16773 16960 17934 43648 41256 35705 33411 30688 30113 8864 13417 15026 16994 17303 18741 18592 21116 20763 21341 23515 24257 23552 24084 23311 22165 20875 21674 20862 21623 21050 21818 20846 22276 20922 23056 22595 23434 22643 22937 22471 22195 21376 21973 21719 21943 20722 22026 21538 22216 22137 22706 22421 22662 22215 22704 22318 22698 22114 22464 22048 22488 22181 22576 21771 22361 21975 22423 22160 22637 21948 22269 21835 22272 21921 22370 22169 22240 21646 22111 21809 22215 22240 22535 21721 22336 21632 22129 21877 22479 22153 22084 21876 22003 21831 22224 22250 22441 21825 22144 22333 22336 22256 22062 22132 21679 22150 22042 22448 22082 22195 21850 22161 22072 22313 22191 22343 22120 22004 22068 22236 22336 22404 22111 22194 21696 22225 21968 22353 22024 22378 21769 22332 21877 22519 22035 22439 21927 22044 21753 22464 22016 22400 21923 22341 21604 22068 21885 22548 21850 22440 21816 22186 21732 22450 21943 22481 21847 22498 21537 22473 21676 22650 21867 22549 
