# Supplementary material for: An Active Feature Selection Strategy for DWT in Artificial Taste
Source: Hindawi journal article supplement (doi:10.1155/2018/9709505), 2018-01-01
Supplement: f1 [file 9709505.f1.zip › redWine-low-2.txt]

43384 43464 43441 43461 60 8209 17376 20133 21660 21921 23040 22937 23468 23361 23640 23511 23712 23681 24009 23783 24264 23620 24218 23907 24067 23831 24281 23862 24200 24089 24326 24188 24440 24128 23962 24103 24342 23654 24365 24144 24162 24112 24508 23907 24333 24048 24462 23861 24630 24137 24232 23993 24561 23821 24416 24148 24421 23973 24480 24102 24391 24084 24532 23904 24454 24129 24493 23980 24613 24000 24348 24128 24656 23830 24534 24108 24592 23808 24715 24052 24220 23939 24688 23990 24461 24112 24720 23828 24408 24042 24711 23712 24700 24012 24439 23860 24744 24008 24402 23943 24741 23878 24687 24064 24708 23769 24519 24064 24680 23998 24752 24111 24448 23956 24738 24081 24364 23923 24676 24065 24334 23949 24695 24012 24532 24140 24677 23849 24654 23801 24669 23852 24587 23912 24736 23831 24434 23823 24674 23820 24450 23816 24650 23857 24472 23901 24725 23972 24464 23964 24558 23760 24569 23877 24594 23756 24508 23892 24752 23814 24425 23853 24592 23964 24562 24000 24530 23943 24464 23828 24516 24128 24582 23672 24454 23886 24592 23814 24416 23928 24506 24081 24385 23960 7315 18817 21163 21217 22075 21932 22617 22347 22587 22248 32704 27496 26300 25084 25133 24552 24911 24401 24649 24198 24586 24265 24647 24130 24518 24192 24552 24227 24486 24029 24532 24176 24744 23936 24427 24249 24642 24264 24314 24087 24463 24298 24518 23918 24344 24247 24439 24390 24235 23877 24288 24178 24573 24215 24155 24026 24551 24295 24448 23973 24217 24243 24437 24560 24332 24000 24284 24270 24697 24167 24133 24152 24722 24099 24320 24104 24551 24305 24375 24082 24714 24194 24183 24263 24336 24004 24456 24164 24151 24540 24102 24128 24576 23963 24517 24066 24347 24288 24182 24591 24154 24231 24239 24368 23942 24629 24048 24590 24072 24517 24166 24520 24252 24361 24156 24228 24262 24160 24238 24341 24365 24458 24314 24499 24184 24469 24121 24548 24040 24496 23911 24526 24080 24647 24080 24556 24091 24530 24212 24576 24255 24512 24157 24543 24126 24583 23944 24686 23939 24732 23995 24785 23895 24509 23895 24492 24123 24676 24118 24632 24080 24568 24155 24480 24130 24563 24276 24523 24247 24487 24148 24445 24080 24475 24055 24524 24028 24645 24024 24673 23976 24676 23962 24752 24400 24736 24208 24746 23959 24737 24361 24672 18307 22137 21939 23173 22386 23379 22441 23544 22529 35872 26893 26242 24616 25333 24312 24994 24273 24768 24258 24732 24228 24460 24241 24554 24284 24626 24043 24704 24172 24711 24071 24697 23849 24797 24029 24599 24131 24440 24151 24745 23831 24797 23899 24662 24020 24627 24084 24724 23870 24652 23963 24716 23796 24522 23905 24466 24030 24483 23867 24644 23941 24597 23881 24565 24141 24456 23848 24464 23797 24664 23610 24545 23903 24536 24073 24736 23929 24619 23945 24850 24012 24557 24064 24440 23915 24500 23841 24644 23809 24624 24165 24420 23982 24542 23912 24512 23967 24348 24136 24402 23976 24552 23942 24485 24064 24480 24056 24597 23971 24416 24123 24419 24057 24482 24460 24461 24145 24521 24007 24518 23877 24409 24137 24269 23992 24491 23952 24384 23968 24553 23900 24448 24012 24505 24045 24597 23739 24345 24076 24457 24000 24413 24205 24176 24026 24576 23901 24228 24153 24416 24073 24306 24341 24049 23971 24410 24145 24202 24100 24652 23770 24138 24426 24348 24055 24264 24496 24036 24040 24529 24261 24263 24116 24587 23915 24224 24135 24611 23888 24206 24390 24361 24041 24293 24527 24037 24104 24331 24343 24202 24102 17995 21912 22702 22950 23611 22998 23300 23223 23792 23097 27253 25502 24899 24880 24473 24687 23979 24635 24437 24443 24101 24640 24279 24551 23911 24744 24196 24316 24056 24563 24156 24272 24077 24636 24196 24340 24272 24423 24164 24162 24306 24585 24093 24364 24232 24527 24057 24385 24272 24640 24044 24253 24072 24589 24112 24326 24068 24634 24012 24410 24140 24654 24100 24320 24121 24602 24039 24288 24155 24548 24050 24282 24100 24596 24147 24374 24072 24620 24102 24302 23948 24736 24010 24242 24008 24692 24096 24423 23964 24690 23989 24471 24106 24647 24092 24599 23648 24555 24118 24691 23734 24480 24106 24679 23824 24538 24034 24710 23854 24583 24113 24717 23892 24467 23937 24716 23898 24357 23962 24599 24121 24384 23964 24641 24055 24380 23868 24697 24065 24512 23768 24521 24056 24630 23728 24536 24008 24729 23712 24216 23767 24580 23859 24411 23812 24452 24042 24428 23803 24625 23984 24499 23840 24439 23908 24492 23711 24409 23928 24535 23988 24448 23864 24590 23890 24387 23760 24380 23940 24568 23799 24504 23904 24596 23697 24405 23888 24576 23910 24616 23810 24516 24021 24346 23834 24450 23989 24578 23789 24448 23866 24588 22008 23136 23150 23682 23488 23644 23399 23823 23608 28391 24811 24884 24192 24690 24000 24532 24091 24513 24240 24384 24087 24463 24095 24376 24069 24474 23813 24372 24083 24292 23914 24470 24149 24152 23954 24439 24071 24212 24261 24581 23776 24232 24224 24284 24384 24298 24390 24092 24038 24460 23927 24252 24200 24527 23908 24256 24213 24460 24007 24274 24457 24183 23941 24509 24224 23852 24096 24609 23927 24041 24093 24357 24150 24315 24421 24105 24039 24715 23929 24297 24384 24093 24284 24102 24096 24474 23907 24562 23977 24588 24076 24278 24263 24468 24266 24258 24459 23994 24375 24030 24251 24192 24519 23813 24422 24177 24633 24009 24311 24097 24489 24215 24272 24249 24175 24042 24417 24135 24425 24205 24457 24309 24418 24274 24535 24224 24512 24051 24449 24121 24508 24050 24484 24000 24435 23962 24530 23961 24789 24089 24343 23828 24283 23945 24456 24048 24464 24200 24472 24141 24615 24171 24516 23846 24320 23850 24549 24082 24628 24074 24518 23970 24313 23927 24631 24080 24534 23880 24398 23963 24593 24022 24231 23840 24556 24065 24504 23667 24596 24036 24530 23724 24527 24029 24601 23654 24600 24050 24516 23745 24781 22196 23720 23616 24386 23419 24325 23668 24204 23545 24400 24492 24657 24136 24550 23894 24684 23911 24560 24101 24836 24018 24628 24012 24576 24096 24372 24008 24669 23810 24663 23874 24616 23950 24316 23866 24599 23973 24608 23706 24474 23744 24587 23744 24494 23815 24597 24044 24344 23901 24470 23669 24442 23781 24576 23804 24556 23928 24347 23920 24386 23793 24519 23792 24453 24004 24410 23756 24397 23749 24472 23662 24345 23541 24393 23664 24513 23785 24496 23701 24476 23779 24528 23895 24505 23850 24482 23837 24441 23196 24448 23957 24387 23885 24288 23747 24279 23864 24257 23745 24320 23924 24393 24071 24324 24081 24213 24045 24388 23990 24214 24058 24453 23968 24297 23962 24203 23902 24448 23945 24436 23992 24402 23822 24422 23875 24420 23820 24434 23765 24179 23911 24176 24117 24150 24271 24224 24184 24064 24053 24340 24013 24485 24002 24385 23873 24228 23941 24145 24423 24071 24338 23956 24192 24268 24009 24478 23906 24508 23869 24181 24236 24093 24332 24137 24055 24133 24052 24404 24010 24485 23876 24209 24215 24042 24389 24001 24084 24112 24075 24535 24481 24272 23951 24112 24353 24033 24398 23769 24379 24021 24262 24160 24365 24108 24333 24080 24549 23880 24515 23733 24528 24012 24300 24071 24017 24165 24284 23964 24438 23724 24480 24042 24304 24160 24121 24212 24279 24015 24439 23712 24452 23964 24322 24163 24272 24188 24489 23953 24497 23753 24503 23866 24459 24152 24180 24106 24311 24000 24593 24012 24515 23841 24506 24054 24577 24014 24236 24042 24609 23790 24506 23717 24614 24010 24360 24038 24294 24133 24392 23900 24583 23668 24648 23841 24471 23980 24305 24020 24417 23843 24687 23800 24684 23799 24589 23958 24458 23905 24506 23885 24653 23601 24654 23926 24441 23920 24409 23970 24517 23775 24593 23690 24663 23965 24247 24026 24376 23905 24599 23685 24761 23783 24413 23830 24380 23801 24634 23754 24449 23698 24407 23992 24373 23748 24440 23792 24488 23572 24542 23780 24453 24097 24039 23914 24324 23693 24605 23581 24540 23616 24296 23856 24391 23816 24396 23720 24385 23825 24513 23744 24488 23584 24426 23872 24259 24032 23828 23850 24277 23778 24544 23851 24327 23754 24377 23907 24268 24008 24203 23913 24425 23849 24493 23764 24338 23978 24258 24072 24622 23910 24331 23936 24497 23800 24293 23809 24339 24076 24193 23845 24196 23910 24524 23808 24361 23768 24249 24055 24202 24009 24176 23922 24520 23388 24257 23783 24256 24285 24188 24066 23954 24053 24340 23943 24489 23966 24184 24034 24252 24344 15191 20220 21300 21434 22416 21911 22700 22151 22500 43449 29557 26352 25604 24761 24820 24229 24622 24332 24780 24169 24594 24333 24384 24629 24272 23982 24705 19187 21613 22720 22743 22666 23424 22992 22904 22816 35692 27408 25580 24945 24649 24801 24533 23960 24119 24681 24394 24775 24156 24358 24102 24545 24294 7747 21330 23059 23076 23420 23317 23521 23261 24036 23724 29425 25644 25092 24499 24688 24282 24583 24275 24569 24221 24516 24168 24535 24064 24460 24019 24676 18227 23140 22816 23572 23183 23744 23402 23986 23612 24043 26360 25303 24467 24782 24364 24792 24212 24525 24016 24352 23788 24560 24122 24647 24064 24724 24057 22703 23300 23879 23398 24196 23782 24394 23753 24229 23490 25048 24137 24802 24108 24802 23882 24519 23825 24782 23990 24782 23892 24659 23730 24715 23945 24761 23763 24419 23972 24689 24053 24496 23674 24603 24050 24661 23960 24343 24092 24660 23936 24248 23997 24608 24022 24412 23909 24715 24004 24539 23720 24720 23928 24600 23843 24620 23817 24341 23932 24533 23836 24438 23912 24481 23754 24293 23993 24461 23952 24514 23833 24456 23752 24451 23890 24150 24039 24420 23644 24631 23847 24441 23968 24440 23744 24505 23761 24401 23760 24423 23677 24600 23757 24377 23947 24495 23733 24519 23745 24370 23930 24409 23827 24388 23760 24453 23954 24320 24077 24332 23952 24391 23699 24450 23936 24200 23903 24304 24053 24332 23824 24380 23888 24403 23921 24320 23898 24262 23972 24266 24030 24281 23729 24365 23889 24567 23936 24344 23959 24285 24071 24213 23998 24272 23961 24364 23744 24342 23908 24535 23963 24397 24002 24152 24131 24064 24161 24300 24343 24204 24081 24216 24004 24297 23863 24365 24007 24405 23857 24503 23824 24500 24023 24104 23991 24096 24199 24116 24297 24096 24349 23949 24372 24103 24338 24112 24112 24195 23930 24134 23829 24264 23818 24309 23981 24380 23311 24464 23958 24604 23957 24435 23955 24540 24036 24119 24615 24032 24329 24089 24448 24018 24407 24072 24460 23963 24409 24108 24427 24053 24397 24136 24243 24253 24261 24087 24392 24154 24194 24192 24044 24093 24042 24118 24061 24064 24263 24071 24377 24022 24399 23976 24625 23929 24581 23772 24579 23680 24582 23841 24487 24020 24388 23924 24482 24032 24313 24093 24256 24118 24397 23878 24598 23658 24521 23618 24594 23796 24577 23996 24392 23961 24210 23987 24167 24085 24390 23955 24547 23818 24551 23597 24585 23737 24608 23896 24488 23922 24507 23864 24247 24000 24528 23822 24646 23748 24604 23536 24646 23785 24481 23976 24256 23980 24455 23941 24450 23592 24567 23600 24586 23993 24785 23892 24256 24052 24548 23736 24621 23684 24675 23837 24521 23759 24364 23729 24600 23716 24436 23716 24532 23793 24429 23842 24425 23761 24592 23794 24364 23730 24250 24020 24297 23880 24480 23609 24509 23687 24454 23832 24488 23680 24546 23784 24439 23610 24419 23971 24359 23748 24433 23716 24368 23674 24434 23966 24284 23821 24379 23869 24481 23881 24340 23888 24282 23864 24265 23819 24337 23708 24302 23996 24591 23873 24368 23787 24333 23851 24201 24066 24202 23889 24447 24046 24274 24048 24249 53 19138 20677 21875 21550 22213 22182 22336 22138 22790 33478 27732 25649 25378 24696 24867 19051 22128 22385 22848 22993 22916 22872 23351 22764 36025 27500 25445 25007 25136 24368 19012 22465 22901 23125 23521 23178 23539 23527 23565 23447 27053 24985 25179 24201 24544 17782 22862 23380 23578 23472 24064 23373 23703 23718 23623 26900 24758 24604 24814 24268 24525 23041 23717 24089 24344 23893 23762 23776 24192 23613 26804 24468 24871 24616 24584 24128 24364 24305 24395 24482 24154 24474 24074 24608 23920 24705 23762 24608 23993 24535 24286 24195 24192 24290 24117 24620 23868 24521 24225 24053 24185 24380 24045 24474 24147 24109 24288 24514 23942 24512 24197 24404 23809 24616 24133 24440 23773 24560 24064 24568 24081 24257 23936 24529 24151 24535 23912 24350 24012 24589 24167 24484 23765 24469 24037 24581 23928 24304 23905 24594 24008 24500 23653 24496 23990 24625 23836 24379 23973 24713 23840 24288 23900 24608 23962 24391 23847 24680 23887 24290 23847 24623 23833 24300 23964 24684 23798 24417 23972 24625 23764 24601 24064 24547 23853 24578 23855 24294 23950 24568 23540 24684 23868 24211 
21125 21208 20629 20820 20916 21320 20939 20827 20586 21161 21143 21070 20756 20850 21029 21075 21418 21059 21043 20917 21501 20743 20986 20741 21383 20819 21085 20764 21197 20883 21158 20839 21188 21181 20920 20880 21386 19387 20132 19672 19984 19548 20219 19538 20103 19809 20359 19255 20371 19919 20166 19845 20428 19875 20230 19941 20454 19639 20467 20096 20259 19933 20544 20007 20348 20088 20569 19986 20572 20172 20637 20077 20594 19861 20388 20105 20624 20009 20564 20247 20359 20235 20536 20152 20523 20402 20829 20101 20455 20352 20626 20190 20596 20533 20357 20244 20714 20395 20320 20434 20806 20449 20534 20361 20813 20092 20599 20504 20640 20224 20553 20793 20592 20365 20657 20675 20371 20298 20736 20667 20608 20432 20818 20517 20414 20422 20856 20490 20592 20533 21056 20373 20554 20553 21004 20352 20495 20602 21067 20494 20560 20723 20841 20395 20823 20723 20429 20943 20669 20925 20481 20586 20601 21031 20375 20813 20513 20992 20463 20587 20565 20904 20616 20662 20503 20901 20631 20781 20493 20958 20688 20884 20408 20883 20839 20986 20526 20659 20558 21113 20547 20736 20666 21165 63 66 3032 5839 6972 8857 9339 10426 10369 11318 34361 27895 24213 23042 21988 22017 21191 21377 20608 21341 20830 21201 20390 21198 20679 21263 20577 20992 20418 21170 20663 21192 20502 20981 20549 21217 20537 21060 20311 21137 20566 21204 20337 20881 20401 21204 20519 21045 20097 20437 20526 21256 20464 20998 20176 21207 20428 21150 20371 20916 20422 21219 20625 21081 20232 20449 20602 21148 20494 20824 20480 21255 20582 20807 20480 21328 20567 21044 20364 21313 20515 20876 20486 21372 20178 21098 20395 21070 20329 21125 20139 21064 20425 20978 20491 21122 20464 20958 20355 21173 20340 21244 20501 21127 20503 21005 20288 21008 20420 21026 20456 21109 20564 20999 20431 21015 20217 20952 20381 20919 20384 21043 20368 21176 20391 21226 20377 21260 20576 21111 20249 21077 20448 21072 20416 20998 20487 20996 20581 20979 20573 20923 20563 20946 20506 21033 20519 20934 20306 20919 20304 20984 20506 21033 20781 21096 20405 21164 20513 21120 20540 21135 20554 20942 20473 20845 20608 20846 20464 21051 20625 20887 20582 21093 20507 21009 20631 21085 20555 21164 20592 21129 20500 21296 20552 21166 20533 21243 20609 21108 20533 61 6816 11059 11970 13569 12922 14727 14410 15098 14688 37275 26679 23929 21991 21881 21128 21387 21061 20925 21168 20848 21130 20897 20934 20730 20733 20867 20761 21173 20574 21299 20516 21014 20405 20997 20917 20649 20968 20729 20771 20893 20546 21276 20794 20945 20673 20774 20981 20837 20909 20647 20736 21140 20633 21029 20454 20731 21200 20615 20977 20460 21109 20795 20823 20836 20924 20545 21161 20437 21395 20609 20995 20775 20880 20805 21093 20704 21086 20572 21197 20757 20904 20857 20820 20819 21105 20534 21133 20789 20940 20917 21024 20655 21049 20432 21009 20792 20835 20771 21123 20401 21231 20602 20886 20816 21164 20427 21219 20624 21153 20759 20961 20663 21159 20567 21127 20828 21165 20391 21262 20681 20961 20739 21168 20368 21389 20736 20886 20663 21330 20508 21124 20700 21152 20554 21241 20608 21045 20785 21259 20444 21229 20695 21162 20628 21389 20621 20947 20573 21256 20403 21203 20715 21285 20256 21434 20642 21102 20472 21370 20561 21292 20594 21344 20359 21289 20682 21209 20467 21344 20674 21004 20567 21340 20619 20957 20662 21206 20595 21128 20655 21281 20439 21224 20608 21221 20357 21327 20597 21240 20361 21416 8631 14330 14875 16440 16422 17178 16650 17649 17209 17864 26071 23410 21403 21544 20816 21492 20418 21270 20641 21219 20724 21111 20563 21239 20392 21133 20635 21040 20360 21251 20608 21102 20433 21208 20465 21210 20455 21217 20608 21230 20511 21249 20555 20969 20512 21254 20546 20887 20574 21152 20663 21179 20636 21044 20736 20887 20633 21081 20604 21032 20593 21185 20597 20955 20523 21152 20625 21095 20579 21105 20764 20856 20645 21005 20742 21168 20636 21073 20749 20969 20576 21080 20626 20918 20613 21051 20855 20922 20535 21165 20689 21015 21064 21017 20804 21125 20504 20985 20855 21125 20422 20962 20716 21261 20551 20788 20846 21215 20571 20953 20845 21070 20756 20995 20688 21169 20824 20800 20637 21041 21126 20776 20563 21088 21226 20794 20679 20999 21043 21063 20647 20930 20787 21223 20548 20769 20795 21284 20633 20737 20778 21305 20816 20957 20736 21032 21047 20623 20603 20903 21166 20682 20671 20944 21109 20629 21056 20846 21120 20749 20848 20669 21351 20823 21127 20629 21209 20881 21096 20608 20943 20928 21109 20790 20871 20871 21200 20967 20885 20753 21184 20909 21152 20490 21093 20891 21206 20761 21057 20885 21267 5547 16348 17544 18711 18542 18944 18411 19265 18855 19375 26564 22602 21515 21472 20776 21338 20834 21376 20576 21113 20864 21299 20553 20976 20873 21242 20480 21142 20786 21360 20439 21304 20753 21278 20535 21339 20767 21149 20661 21367 20621 21109 20669 21432 20368 21271 20657 21351 20504 21461 20689 21085 20590 21455 20553 21095 20709 21309 20504 21229 20861 21308 20439 21300 20800 21111 20677 21397 20639 20936 20697 21341 20597 21239 20786 21300 20472 21425 20596 21167 20480 21308 20423 21353 20384 21293 20560 21223 20704 21253 20704 21274 20392 21281 20466 21176 20610 21121 20493 21286 20669 21025 20822 21133 20560 21014 20701 21153 20439 21176 20523 21264 20459 21159 20416 20917 20430 21145 20633 21392 20723 21377 20668 21250 20629 21133 20590 21029 20551 21031 20576 21129 20640 21157 20587 21155 20599 21184 20599 21136 20613 21089 20598 21229 20585 21024 20601 21085 20787 21266 20682 21107 20667 21081 20624 21091 20493 21031 20712 21248 20609 21194 20673 21232 20661 21150 20753 21173 20608 20999 20683 21216 20599 21008 20452 21206 20775 21112 20581 21058 20744 21049 20654 21054 21047 21177 21068 20914 20841 20937 20448 21193 17901 19620 19990 20150 19691 19998 20120 20087 19790 29013 21793 21159 21191 20983 20610 21282 20669 20924 20992 20823 20649 21103 20578 20955 20841 20871 21004 20968 20503 21303 20582 21055 20888 21031 21195 20915 20673 20969 20801 21341 20720 21090 20947 20711 21016 20741 21096 20919 20708 20989 20778 21078 21117 20755 21335 20712 21337 20608 21240 20794 21340 20705 21279 20729 21084 20973 20930 21002 20866 20910 20832 20936 21199 21048 21142 21080 21097 21018 21157 20775 21091 20736 21100 20787 21137 20812 21201 20841 21114 20775 21119 20686 21193 20766 21073 20782 21101 20785 21031 20767 20803 20859 21057 20972 21127 20776 21187 20727 21314 20682 21302 20519 21272 20759 21356 20506 21367 20480 21488 20592 21394 20631 21392 20650 21288 20728 21256 20716 21147 20812 21095 20788 21157 20660 21417 20562 21420 20396 21415 20433 21461 20583 21333 20667 21378 20623 21136 20716 21313 20595 21358 20308 21386 20392 21437 20562 21277 20775 21085 20768 21114 20861 21303 20616 21376 20405 21450 20608 21367 20596 21133 20454 21214 20450 21495 20530 21223 20418 21184 20613 21192 20645 21134 20490 21221 20595 21429 20601 21080 20534 21129 20856 21177 20585 21031 20528 21404 20336 21250 20321 21229 20489 21147 20648 21305 20531 21206 20401 21307 20391 21156 20621 21165 20710 21189 20638 21163 20654 21303 20487 21140 20688 21117 20778 21020 20715 21179 20613 21372 20781 21159 20659 21076 20761 21017 20632 20983 20664 21216 20618 21207 20631 21162 20856 21092 20745 20933 20752 21192 20573 21183 20424 21122 20699 21035 20770 21017 20653 21038 20727 21288 20674 21186 20650 20993 21007 21031 20835 21024 20790 21225 20894 21123 20600 21049 21045 20885 20905 20894 20765 21415 20638 21101 20864 20828 20929 20744 20813 21135 20641 21269 20653 21027 21013 20840 21012 20776 20713 21412 20759 20974 20917 20835 21190 21120 20967 21174 20713 21272 20600 20855 21040 20838 20981 20710 20801 21155 21065 21061 20967 21083 21117 20741 21230 20519 21294 20671 21209 20848 21049 20887 20956 20980 21104 20796 21168 20622 21212 20796 21126 20951 21033 20949 20918 21064 21104 20753 21147 20613 21350 20762 21184 20850 21021 20870 21069 20859 21200 20750 21210 20563 21405 20738 21190 20869 20889 20927 21272 20649 21369 20425 21373 20813 21069 20838 21117 20718 21366 20618 21358 20419 21447 20593 21287 20777 20965 20890 21191 20693 21473 20431 21458 20656 21248 20745 21113 20737 21323 20587 21377 20501 21435 20503 21463 20714 21367 20670 21125 20708 21291 58 6509 7737 10103 10121 11431 11455 12515 12295 43301 30900 26012 23333 22666 21535 21738 21029 21473 20778 21585 20487 21392 20404 21280 20485 21120 60 7777 11719 14121 14024 15365 15066 16093 15491 16328 37800 27492 23495 22976 21445 21892 21085 21356 20693 21445 20679 21335 20483 21179 20361 21152 20651 1511 12919 15935 16238 17463 17026 18065 17413 18296 17600 30071 23647 22583 21408 21589 20923 21383 20858 21320 20747 21186 20744 21178 20757 21141 20656 21109 11457 17155 17908 18788 18513 19207 18651 19268 19023 19546 24760 22536 21431 21530 20931 21261 20839 21216 20685 21148 20859 20975 20744 21332 20807 21213 20836 17922 19008 19900 19561 20041 19813 20419 19931 20252 28336 22128 20964 21256 21121 21136 20923 21025 20640 21095 21036 21248 20876 21006 20576 21136 21152 21113 20808 21018 20908 21334 20824 20890 20700 21056 21060 21073 20638 20728 20982 21363 20804 20942 20774 21388 20835 20771 20547 21309 21013 20908 20549 21203 20903 20849 20608 21349 20933 20865 20620 21287 20824 20208 20900 21341 20731 20838 21112 21045 20706 20720 21005 21223 21012 20810 21300 20891 21056 20930 21168 20569 21355 20775 21014 20823 21275 20583 21097 20881 20916 20923 21235 20686 21228 20782 20983 20944 21020 20921 21166 20660 21174 20947 20903 20811 21273 20629 21289 20839 21142 20894 20888 20864 21178 20817 21322 20465 21257 20726 21126 20864 21246 20809 21291 20569 21431 20548 21317 20803 21175 20975 20981 20822 21413 20775 21303 20605 21413 20422 21337 20647 21365 20749 21224 20881 21058 20759 21340 20691 21287 20594 21504 20421 21498 20317 21468 20459 21455 20556 21370 20709 21200 20776 21034 20685 21306 20711 21243 20694 21347 20601 21371 20580 21390 20370 21336 20757 21379 20629 21302 20736 21271 20704 21299 20743 21213 20759 21134 20710 21111 20624 21284 20506 21200 20634 21282 20600 21124 20780 21129 20679 21233 20627 21274 20662 21270 20629 21103 20727 21118 20716 21107 20686 21295 20435 21245 20435 21318 20528 21260 20576 21223 20557 21219 20535 21233 20693 21240 20651 21635 20677 21465 20633 21161 20554 21044 20672 21047 20691 21136 20621 21253 20686 21296 20503 21258 20741 21263 20519 21193 20539 21127 20839 21120 20807 21148 20709 21210 20673 20880 20658 21097 20587 21338 20534 21220 20626 21132 20513 21124 20599 21197 20783 20995 20832 20855 20870 20946 20855 21175 20715 21316 21141 21127 20480 21088 20903 20992 21020 20840 20959 20825 20855 20876 20815 21157 20807 21200 20858 21059 20786 20857 21248 21120 20993 20855 20840 21179 20560 21268 20654 21085 20980 20862 21003 20713 20775 21250 20774 21216 20534 20933 21111 20748 21049 20645 20936 21077 20651 21220 20579 21075 21088 20789 21013 20675 20982 21192 20776 21065 20935 20959 21169 21073 21271 20576 21243 20870 20932 20914 21171 20747 21216 20630 21215 20813 21107 20995 21040 20939 21178 20634 21221 20980 20901 21089 21017 20841 21173 20628 21239 20845 20983 20960 21084 20808 21294 20554 21314 20865 21029 20880 21190 20750 21394 20465 21245 20869 21008 20994 21137 20431 21449 20713 21303 20798 21086 20645 64 3894 8797 9838 10935 11561 12677 12421 13545 13191 37957 27698 24615 22518 22503 21248 8488 12819 14653 15211 16393 15580 16843 16375 16800 38933 27936 23464 23153 21687 21938 9864 15830 16543 18166 17440 18488 18023 18661 18087 42008 25743 23661 21897 21777 21393 11515 16912 18920 18424 19639 19069 20018 19212 19680 19285 25722 22072 22336 21130 21601 12587 19227 19404 20390 19570 20686 19745 20581 19843 20475 23856 22157 21255 21486 20927 21435 20960 21314 20897 21288 20916 21227 20857 21504 20605 21333 20528 21374 20553 21477 20545 21133 20782 21393 20592 21386 19985 21445 20622 21288 20752 21204 20423 21397 20711 21161 20716 21282 20687 21098 20866 21227 20421 21309 20697 21155 20673 20941 20919 21130 20728 21142 20553 21270 20802 21134 20569 21018 20636 21302 20761 21182 20665 21000 20775 21327 20695 21115 20507 21230 20823 21152 20501 20974 20867 21234 20717 20837 20743 21249 20855 21024 20659 21255 20819 20977 20668 21213 20930 21092 20844 21264 20849 20796 20968 21177 20706 20813 21148 21021 21072 21124 20933 20943 20692 21285 20763 20756 21134 21079 20768 21315 20986 21076 
21763 21320 21779 21205 21623 21410 21677 21303 21200 21234 21898 21352 21698 21318 21816 21369 21641 21315 21568 21479 21734 21257 21707 21397 21853 21265 21552 21217 21876 21296 21639 21223 21828 21317 21600 21292 21799 21252 21456 21403 21771 21241 21495 21534 21613 21226 21601 21408 21637 20865 21777 21330 21621 21219 21729 21364 20907 21578 21643 21275 21569 21475 21691 21349 21809 21336 21581 21408 21618 21321 21546 21429 21543 21267 21749 20753 20265 20551 20309 20736 20117 20731 20416 20711 20293 20796 20427 20484 20329 20832 20413 20717 20519 20852 20085 20777 20416 20892 20332 20912 20480 20795 20315 20937 20497 20600 20502 20856 20384 21093 20544 20953 20369 20752 20524 20898 20241 20901 20595 20852 20269 20923 20565 20919 20116 20972 20591 20854 20381 20957 20512 20837 20396 20869 20522 20744 20390 20900 20620 20874 20495 20950 20547 20675 20472 20962 20609 20720 20487 20935 20696 20937 20455 20914 20579 21038 20432 20896 20532 20931 20474 20919 20647 20839 20377 20898 20612 21036 20503 20974 20469 21090 20418 20885 20567 20961 20690 20873 20564 20996 20792 20918 20582 20957 29 1237 2342 3827 4517 5715 6243 7383 7433 35508 23731 22428 21419 21302 20877 21185 20898 21168 20889 21111 20748 21166 20749 20973 20603 20992 20859 21090 20512 20964 20752 21111 20748 21013 20729 21077 20929 21268 20657 21012 20828 21284 20897 20936 20870 21067 20995 21191 20665 21116 20844 20999 21136 21125 20920 20979 20851 21280 21050 20816 20755 20996 21062 21356 20690 21298 20919 21110 21232 20923 20845 21099 21261 20945 20810 21021 21196 21089 20837 21056 21255 20852 20827 21347 20913 20994 21184 20873 20859 21441 20805 21053 21059 21070 21281 21153 21056 20923 20941 21307 21249 21144 21121 21145 21132 21178 21010 21136 20983 21083 21207 21044 21319 21007 21390 21267 21223 20817 21203 20805 21225 20884 21325 21080 21338 21104 21181 21245 21249 21239 21257 21190 20983 21252 21102 21204 21099 21189 21175 21167 21207 21095 21196 21168 21112 21154 21070 21127 21171 21109 21216 21133 21504 21232 21253 21283 21414 21148 21387 20939 21415 20866 21395 20825 21429 20862 21440 20837 21380 20795 21445 20770 21419 20816 21505 20896 21480 21024 21497 21037 21464 21032 21429 21106 21376 21057 21394 21093 21467 21163 21472 4375 11375 12689 13898 14284 14970 15119 15685 15698 15940 25215 22439 21497 21509 21192 21255 21222 21414 21242 21565 21113 21602 21068 21551 20934 21584 20992 21648 21143 21495 21155 21376 21153 21392 21214 21500 21135 21640 20865 21588 20982 21595 21165 21473 21010 21430 21014 21560 20863 21396 20857 21425 21193 21391 21081 21386 21127 21719 21064 21405 21084 21429 21168 21367 20978 21483 20892 21507 21013 21509 21135 21449 21080 21382 21001 21625 20940 21520 20871 21456 21124 21397 21011 21474 20960 21550 20864 21423 21063 21367 20974 21557 20954 21504 21145 21407 21127 21312 21169 21559 21088 21428 21240 21414 21124 21592 21064 21456 21258 21340 21134 21435 21075 21381 21155 21358 21122 21561 21088 21415 21197 21591 21141 21532 21047 21387 21288 21298 21145 21481 21091 21325 21147 21565 21088 21489 21220 21512 21137 21601 21011 21363 21152 21511 21231 21461 21418 21181 21127 21487 21148 21336 21256 21522 21035 21406 21432 21253 21051 21303 21493 21211 21191 21836 20993 21213 21202 21580 21221 21354 21443 21385 21035 21329 21515 21243 21184 21446 21373 21232 21208 21588 21168 21179 21279 21603 21066 21322 21469 21465 21068 21338 15987 17196 17467 18089 18551 18305 18373 18820 18865 29873 22176 21868 21255 21289 21213 21576 21120 21456 21370 21300 21580 21351 21565 21222 21402 21415 21558 21036 21448 21352 21513 21093 21466 21455 21405 21493 21511 21399 21414 21400 21549 21454 21287 21288 21521 21489 21277 21327 21592 21536 21408 21280 21575 21376 21518 21190 21596 21369 21481 20865 21680 21300 21556 21017 21572 21419 21448 21159 21617 21316 21548 21056 21584 21363 21572 21088 21683 21276 21552 21241 21587 21360 21684 21000 21596 21297 21595 21013 21496 21378 21698 21062 21583 21357 21648 21221 21554 21250 21669 21258 21401 21109 21671 21404 21370 21152 21723 21248 21475 21117 21760 21284 21515 20886 21696 21315 21642 21243 21680 21269 21575 21107 21609 21328 21633 21104 21507 21303 21767 21172 21755 21313 21705 21186 21605 21257 21701 21308 21353 21088 21696 21204 21655 21032 21636 21063 21678 21112 21435 21137 21701 21031 21480 21098 21676 21263 21419 21208 21569 21300 21445 21184 21585 21216 21647 21015 21575 21144 21679 21041 21609 21062 21645 21237 21411 21113 21511 21335 21490 21429 21538 21126 21735 20979 21520 21208 21652 21271 21383 21185 21448 16009 19467 19512 20018 19799 20292 19914 20185 19844 20416 22313 21618 21237 21607 21235 21771 21297 21628 21133 21548 21201 21643 21144 21549 21212 21612 21200 21352 21288 21640 21124 21420 21304 21584 21378 21488 21427 21328 21161 21619 21381 21521 21228 21643 21164 21352 21348 21662 21165 21499 21525 21267 21213 21499 21428 21292 21239 21673 21251 21303 21288 21709 21143 21458 21479 21447 21093 21440 21556 21447 21132 21553 21352 21353 21256 21596 20586 21362 21622 21387 21381 21463 21158 21732 21248 21464 21299 21304 21478 21414 21312 21445 21238 21763 21304 21138 21408 21616 21345 21465 21621 21329 21481 21414 21626 21277 21563 21454 21687 21270 21297 21462 21634 21419 21623 21269 21410 21356 21256 21357 21458 21399 21562 21419 21671 21488 21675 21484 21603 21447 21596 21445 21524 21420 21513 21418 21561 21448 21547 21418 21595 21457 21650 21289 21481 21341 21523 21094 21433 21277 21625 21450 21745 21392 21728 21340 21497 21089 21415 21259 21686 21296 21720 21179 21367 21280 21717 21376 21674 21233 21355 21386 21675 21329 20918 21177 21768 21365 21643 21068 21725 21365 21612 21035 21747 21290 21604 21013 21764 21351 21421 21357 20756 20555 21109 20829 21225 20448 21303 20829 21047 23744 21841 21097 21746 21384 21504 21351 21722 21102 21680 21251 21394 21349 21729 21111 21654 21209 21573 21357 21699 21308 21755 21070 21721 21148 21736 21200 21392 21192 21617 21274 21658 21068 21597 21174 21662 21165 21690 21154 21558 21185 21960 21367 21621 21292 21522 21180 21463 21317 21683 21130 21637 21074 21767 21184 21697 21079 21538 21144 21576 21220 21668 21216 21608 21301 21588 21355 21576 21277 21444 21268 21553 21378 21569 21351 21518 21319 21521 21302 21440 21312 21427 21326 21430 21395 21526 21346 21473 21293 21544 21161 21399 21199 21496 21245 21554 21292 21718 21274 21713 21223 21709 21209 21613 21176 21600 21368 21584 21181 21586 21194 21552 21144 21614 21244 21528 21446 21480 21511 21408 21372 21223 21271 21359 21206 21643 21189 21745 21383 21525 21067 21543 21409 21552 21616 20839 21376 21233 21280 21573 21305 21784 21173 21737 21267 21422 21441 21376 21686 21315 21403 21300 21277 21748 21251 21732 21360 21512 21307 21363 21582 21473 21397 21350 21297 21725 21151 21551 21145 21427 21468 21296 21515 21335 21260 21499 21325 21560 21968 21477 21365 21489 21597 21258 21606 21166 21713 21357 21607 21561 21648 21544 21419 21440 21591 20662 21556 21329 21553 21489 21418 21504 21344 21483 21580 21313 21618 21150 21601 21415 21436 21465 21386 21477 21725 21296 21654 21201 21619 21321 21469 21400 21369 21461 21612 21267 21672 21085 21632 21399 21552 21338 21351 21479 21687 21163 21684 21136 21788 21336 21497 21408 21568 21412 21511 21274 21746 21352 21682 21072 21707 21367 22023 21413 21491 21344 21763 21204 21742 21060 21783 21366 21555 21403 21417 21371 21713 21132 21784 21020 21709 21331 21735 21337 21555 21280 21744 21285 21719 21283 21568 21420 21559 21392 21620 21187 21799 21017 21712 21330 21600 21341 21504 21164 21831 21453 21607 21184 21600 21329 21462 21157 21794 21154 21602 21159 21555 21312 21593 21234 21520 21314 21626 21239 21690 21199 21684 21170 21576 21286 21505 21250 21472 21109 21777 21058 21636 21045 21581 21198 21577 21294 22075 21191 21377 21238 21683 21144 21748 21141 21592 21315 21468 21376 21914 21150 21591 21252 21664 21203 21676 21112 21536 21458 21510 21258 21442 21351 21690 21159 21614 21123 21566 21345 21525 21369 21450 21239 21642 21102 21632 21244 21604 21284 21480 21331 21422 21302 21547 21248 21815 21129 21530 21376 21490 21499 21396 21312 21479 21216 21665 21153 21518 21268 21515 21540 21438 21416 21378 21392 21729 10856 13289 13664 14404 14829 15072 15558 15528 15798 28557 23187 21941 21783 21641 21594 21360 21656 21408 21440 21453 21208 21689 21188 21583 21306 21325 6145 16034 16597 17465 17582 17749 17739 18377 17979 18139 25297 22476 21924 21549 21381 21468 21699 21517 21514 21200 21668 21477 21655 21387 21392 21298 21379 15120 18683 19156 19338 19416 19617 19529 19752 19729 19863 23204 22003 21543 21641 21518 21601 21523 21573 21479 21642 21499 21728 21415 21696 21368 21766 21510 18974 20059 20533 20310 20455 20235 20532 20234 20352 32928 22125 21344 21735 21412 21813 21440 21861 21401 21734 21436 21626 21335 21476 21252 21684 21436 21696 20604 21289 20838 21130 20857 21127 21012 21395 21029 24294 21378 21708 21183 21780 21452 21733 21322 21922 21073 21667 21429 21805 21347 21637 21016 21813 21360 21814 21225 21475 21388 21804 21456 21647 21088 21733 21413 21785 21228 21566 21468 21742 21313 21493 21432 21735 21431 21686 21291 21818 21451 21625 21219 21857 21287 21851 21275 21744 21214 21664 21389 21672 21161 21516 21444 21626 21156 21737 21308 21646 21283 21746 21212 21012 21322 21560 21231 21655 21276 21577 21191 21777 21262 21715 21364 21740 21352 21737 21249 21593 21370 21624 21138 21856 21187 21648 21189 21621 21277 21614 21180 21747 21230 21792 21511 21633 21188 21699 21227 21712 21221 21623 21371 21591 21319 21639 21238 21783 21366 21509 21289 21609 21485 21620 21241 21624 21207 21764 21241 21657 21322 21492 21297 21553 21425 21661 21248 21601 21288 21636 21252 21779 21330 21553 21299 21549 21430 21479 21488 21542 21389 21617 21129 21575 21304 21739 21236 21807 21298 21702 21320 21399 21408 21432 21516 21591 21696 21425 21613 21481 21491 21448 21312 21645 21314 21732 21320 21872 21217 21912 21270 21680 21277 21662 21425 21321 21358 21325 21505 21465 21604 21476 21687 21389 21717 21364 21701 21403 21592 21457 21673 21460 21393 21472 21385 21472 21302 21607 21451 21466 21509 21568 21504 21528 21511 21518 21416 21564 21490 21547 21467 21559 21505 21506 21595 21365 21632 21457 21632 21323 21746 21358 21661 21508 21656 21259 21672 21276 21664 21265 21727 21349 21720 21424 21616 21476 21504 21499 21565 21505 21344 21547 21410 21551 21667 21328 21737 21228 21828 21175 21760 21301 21737 21404 21643 21457 21621 21384 21474 21435 21437 21464 21701 21260 21814 21205 21704 21192 21802 21166 21812 21400 21608 21410 21541 21456 21632 21388 21796 21282 21817 21253 21786 21075 21837 21324 21648 21412 21575 21376 21475 21426 21792 21211 21721 21126 21842 21368 21665 21480 21462 21404 21720 21319 21746 21077 21808 21317 21672 21347 21681 21317 21755 21126 21841 21139 21591 21252 21657 21357 21519 21243 21815 21111 21704 21187 21687 21351 21618 21350 21494 21287 21701 21200 21690 21289 21686 21265 21664 21195 21807 21075 21641 21097 21702 21467 21509 21202 21755 21187 21644 21079 21668 21381 21623 21182 21769 21235 21699 21187 21703 21376 21590 21317 21627 21165 21701 21120 21559 21440 21600 21301 21720 21194 21579 21297 21552 21414 21554 21308 21757 21623 21523 21459 21552 21273 21591 21344 8237 13078 14487 14884 15404 15460 16078 15754 16302 16259 24642 22155 22062 21268 21740 5499 16937 17641 18017 17999 18692 18095 18648 18675 18649 25266 22613 21444 21712 21664 21571 18023 19578 19282 19751 19622 19812 19791 20017 19728 27810 22008 21666 21745 21504 21477 18871 20025 20718 20281 20592 20700 20583 20436 20564 20447 22567 21200 21586 21536 21451 18996 20747 20864 21323 20913 21464 20841 21217 20902 21109 22115 21616 21672 21444 21752 21376 21701 21550 21431 21606 21543 21573 21404 21530 21456 21479 21625 21520 21773 21344 21657 21433 21639 21639 21353 21559 21621 21450 21634 21640 21644 21527 21641 21575 21632 21402 21633 21512 21594 21216 21728 21544 21589 21226 21803 21498 21646 21185 21680 21504 21723 21523 21499 21242 21783 21594 21725 21327 21507 21408 21744 21526 21703 21127 21698 21488 21832 21383 21532 21335 21751 21537 21643 21107 21696 21478 21811 21308 21459 21482 21794 21322 21583 21377 21837 21297 21530 21408 21853 21248 21504 21384 21859 21289 21594 21453 21780 21492 21750 21445 21625 21189 21802 21369 21536 21436 21843 20956 21815 21433 21655 21369 21837 21317 
35938 40961 36151 39968 34610 41765 35256 40928 40036 40377 37472 41428 35273 40961 36544 41676 34668 40924 33632 42708 35888 40320 35526 41780 37232 40373 33420 39880 37221 40649 34690 40201 36608 41035 34061 40648 36479 40167 42513 42319 36206 40422 43272 33622 34192 40096 34127 41646 34609 36118 35816 41056 34563 40041 35617 41459 37170 33768 34400 40565 33719 42576 35469 41383 36469 41184 34100 41637 34424 40992 33559 42069 33672 40321 35985 40752 43221 33292 32849 39335 37057 42070 33330 33697 34342 39425 36755 42469 42599 33280 41928 41893 34266 40568 37350 40652 38242 35610 32992 39589 37495 42017 42545 33815 41965 33654 42695 33693 37568 41420 42368 33210 41356 34945 32306 36296 39973 36803 33323 35939 40536 37189 32956 36790 38832 37612 33511 36053 41672 37655 32076 35776 41737 36469 32340 34521 41579 36751 33495 36119 32152 37016 32663 33988 42408 37511 33280 34464 31821 36904 34365 36967 42551 36953 33106 38016 42044 36624 32405 36772 42668 37232 33959 35972 41524 36707 33284 37937 32266 37424 42657 38887 41996 36688 33042 37094 34272 36181 32789 37305 35383 36782 33115 37275 18245 20704 22320 28586 25492 28302 23542 25805 26295 39361 36695 42894 42518 41175 36661 39632 36627 39354 36612 39089 34986 39541 35112 37559 33577 37195 36394 38604 32120 37102 34747 38999 34984 37717 34952 38502 36961 40378 34072 37575 35930 40526 36664 36952 36252 38512 37645 39936 34248 38944 36197 37689 39016 39116 36897 37601 36216 40393 38424 35617 34913 37400 38405 41600 34488 40552 37152 39000 40225 37182 36224 38916 40599 37244 35669 37965 39936 38760 36096 38086 40469 36249 35952 41352 36906 37458 39566 36418 36363 42195 35847 38385 38405 38657 40640 39416 38242 37091 37248 41068 40355 39337 39004 39393 39247 39800 37801 39020 37845 38797 40203 38258 41238 38121 41920 40611 40485 35850 39912 35728 40192 36480 41252 38719 41402 38929 39948 40737 40321 40660 40512 39960 37902 40228 39137 39984 39088 39895 39884 39888 40248 39049 39991 39520 39046 39392 38696 39234 39709 39115 40037 39387 32652 39922 40439 40824 42251 39573 41956 37412 42183 36325 41780 36069 42201 36646 42103 36251 41498 35813 42332 35296 42129 35760 32625 36188 42665 38000 43080 38496 42608 38201 42315 39077 41505 38433 41776 38999 42864 39868 42672 24503 27587 30802 34093 38224 35660 37144 33163 33033 35719 41920 43392 43364 33178 39561 40528 40356 42210 40692 33920 38912 34066 38344 33696 36901 33640 37184 34350 39234 43211 39687 41525 39501 41700 40425 43241 39640 34469 36016 33753 37481 34112 39515 42744 37925 42284 38056 33521 36384 41709 36477 42069 40091 42128 38888 41796 39372 35642 38287 42129 38912 42353 39628 41870 37710 42964 36832 32796 37618 32876 39168 42550 38791 41736 37888 34452 37017 32807 36186 42263 39168 41968 38005 42668 37434 33536 35841 42276 38740 41859 37860 33562 37143 32582 39083 42268 39394 40926 39681 33764 38418 42193 40578 42221 39172 33964 38189 42370 40615 41536 39460 42530 38807 41749 39610 41778 39108 33686 38385 42224 40245 34162 39118 33280 38171 41878 40877 40920 39488 42956 39019 41368 39617 33872 38389 42884 40353 32960 38912 34072 37644 41626 39397 33088 40296 42756 42396 40087 39308 43210 39617 41334 40456 33090 38033 42089 42446 40547 38566 41088 43195 40464 40086 36821 37459 40228 40005 33933 40041 41636 42597 41984 38420 41181 33239 40375 39698 42528 42124 40393 40113 33952 39239 39912 40970 34274 38309 41176 43016 42951 38753 41397 36690 37842 30801 37261 32188 39288 40554 34997 35339 40368 40295 37236 40423 40916 40400 33808 38656 42395 41970 41016 33978 41412 33959 40037 42056 42417 33798 37967 42368 41655 33157 38625 42724 43008 42370 43255 33288 41768 42281 42006 33780 42413 41061 40841 33128 42596 40967 41571 34096 32896 41564 40631 33992 41222 33280 39607 34148 41556 43067 36468 34749 40672 33582 37752 33629 42032 42586 39812 34349 40816 33580 37997 33701 41440 33810 38412 35053 40498 33425 40267 34042 41236 35108 37495 34048 40605 34268 37701 42936 41800 35280 38304 34084 41509 34556 40065 33505 39975 34952 40249 42075 39229 35033 41836 41936 39405 35704 39970 42880 39472 35648 40520 33192 36329 34912 40920 34624 40419 34941 40407 33975 38816 34281 40857 34418 38602 32898 40807 36084 39481 36069 40881 35434 39572 34232 40230 35355 40905 41680 38743 35033 39797 34836 37898 34311 38377 35092 38848 42503 39356 35318 38048 42760 39109 35016 40515 42384 40195 33704 40624 42561 39800 33906 39797 34838 37840 33851 39052 35223 37992 34232 38263 34657 40279 42192 39297 33088 41173 43016 42501 33416 38881 35804 37559 32838 39750 34613 40496 41943 39892 42472 36884 31704 31891 37496 35625 40535 36898 39725 35959 41728 41953 34432 40276 34392 40232 36040 40713 34621 39138 33495 39680 34676 39072 33607 39938 34360 39608 41512 40860 34513 38812 42225 41097 33848 41312 42928 42528 41251 39705 34441 41520 33130 40113 34697 39424 41504 41563 35030 39585 43271 33409 40279 40362 43317 42464 41100 40713 35043 40155 41160 40846 35591 39297 42547 43200 42816 39062 42229 33667 42308 39378 33497 41216 41692 40480 34180 33222 41295 34553 41685 41898 42944 39716 35641 39955 42679 41136 41035 42989 42340 41061 42598 40672 35920 40800 39247 41904 34315 41179 42838 34634 40960 43041 42354 34677 40576 33872 42415 35399 40421 40913 42786 34516 42080 34711 40394 42064 41777 40473 41824 42688 42253 33845 42042 35158 42594 35246 42770 34372 42356 34279 42240 33227 41939 33163 41893 33820 42151 33721 41920 34328 42295 34704 40640 43020 41745 33296 38625 42373 40965 34603 42312 35933 41529 35569 41280 43251 38947 42262 40710 35209 40544 35527 39745 41876 40677 35594 41308 35072 40154 41760 41945 35217 41024 37174 39704 35856 41588 34771 38361 35696 41584 34446 38080 35845 40693 34192 37696 35712 41494 42516 41925 35120 32795 38790 36113 40202 42336 41280 36217 38299 36620 36632 38812 35763 41525 32807 41359 35670 38925 34864 40151 41857 41696 35691 39047 34701 39948 33831 41498 35350 40914 36184 38555 35559 39270 35671 39680 41702 39969 34344 40424 34818 38378 34208 39527 34937 39556 35194 39203 33626 39501 37977 41819 34584 40673 33102 39552 42832 41336 35195 39016 34481 38336 35958 39494 35159 38617 33207 39020 33752 39928 34805 39826 34208 40768 33980 41464 33852 40560 42450 40647 33556 41314 33762 41401 33290 40992 33129 40708 42305 41056 42418 41527 42484 42105 33341 41127 42832 41193 33443 39343 42087 40356 43079 40896 33546 40631 35575 40504 35424 40240 35557 40000 34489 39463 33986 41399 33862 39712 33880 39693 33383 39015 34432 40356 33193 42181 42977 33286 41587 41972 40538 40792 41940 40242 34708 39703 35811 41680 33312 38395 33472 41704 33485 33923 36116 41344 40438 40605 33875 40805 36112 39609 35799 40408 42420 42519 41669 35254 40960 42231 41032 40912 35904 40212 35659 41317 33015 40865 41797 34136 42440 42138 41689 40988 35808 39516 33749 39155 42305 42967 40916 33244 41197 40592 43320 41576 33692 37763 42808 41932 43092 34432 40224 34281 39509 35386 41568 34469 33453 34118 33079 41995 42376 34306 34064 33258 40904 33574 42617 42368 32856 40983 43140 34101 40768 34399 39328 34100 41997 42594 42945 42008 43048 35912 40577 34778 39745 34444 40984 43008 42100 41969 42856 34512 40352 34921 38704 34207 41813 33494 41140 41767 43140 35436 39541 35040 38887 36192 41155 43255 42100 33681 41763 33204 40375 35841 41305 35077 38243 35432 41674 38839 42146 43206 41488 35965 39840 35972 38218 36175 41600 33704 41848 42343 42080 35504 39072 36050 37872 35461 41144 35907 41268 33682 40273 35729 40610 35699 40588 33608 41960 33876 41421 34445 39639 36447 37848 35197 41013 34058 41317 32792 39340 36802 42522 34515 39410 33984 40963 42799 39709 36183 39253 34093 39410 33600 40624 34155 40107 32967 40710 34581 40394 35248 40036 35046 39393 33751 40537 32874 39955 42661 39252 35952 38199 34328 38132 33959 39855 33895 40752 39459 40036 41648 40616 35156 39112 35820 39221 33956 40864 42884 41685 37671 39489 34146 40046 34691 39859 35045 38850 33123 42217 33108 40170 42390 41833 35309 39481 34459 38903 33829 41137 33293 41517 42691 40781 34616 38893 34210 40344 34175 40448 42896 41514 42485 41168 33672 39888 36652 39096 33236 41184 43028 43474 42080 41051 43092 40224 34816 39208 33176 40194 33184 32984 42217 42256 41753 41844 35634 32381 37448 31687 29000 33821 36330 31764 31109 34168 46976 41271 38081 36181 34370 33848 41210 34752 41652 42348 42882 40226 35239 39610 34136 40817 41442 22758 36208 31461 30350 31784 33632 33676 40296 36584 38189 42569 43736 37841 33560 41488 42901 35452 32986 32696 39531 34807 42650 34983 41717 41816 40968 41817 37030 33741 38432 40480 41408 33572 32272 34629 34437 36159 40896 38772 33497 34278 32911 33779 32856 33488 42673 34711 43008 35638 42092 35180 41494 35997 32793 36522 38400 32613 40704 42754 40408 32598 39824 41216 32279 39736 41292 35943 41872 36643 42102 37241 41920 35851 42272 34661 41253 42885 40460 35081 42233 35194 33376 40579 36167 39059 36365 39121 37801 41856 38231 42842 41792 35508 39894 36016 42432 35873 41063 37639 38468 34838 42132 36644 41394 34594 37654 36449 41359 36616 40229 42897 42048 36535 42296 34960 38427 35685 41984 36291 40256 33893 42505 36081 40874 43179 42508 36001 42305 35256 40772 36645 42535 34672 40039 36992 40806 37099 40666 35751 40148 34698 41738 34976 39404 33076 42072 34642 39216 35776 40946 34785 40564 35840 40029 37987 41159 33675 40352 34862 40501 33920 39762 35981 40456 35539 41463 35924 41334 35870 40100 34134 41557 34508 38971 36837 39760 34471 39683 34474 40585 34507 39623 35908 40345 36057 32920 34035 39536 35281 40280 35299 40117 34599 41691 34251 41032 34690 40288 36260 41620 33080 40565 34359 42831 34512 40336 34455 40018 35808 40404 34816 41008 43072 41048 33573 41909 35049 39942 34117 40496 34438 40070 36096 41065 33556 40704 33703 42070 43152 43040 33593 41687 34418 38985 33909 40693 35955 40236 36666 40736 35361 40932 42154 42067 42472 33236 33840 34794 41978 34580 42695 43222 42657 41064 34793 40808 35684 40936 37120 40056 37533 40539 34923 40620 34976 41985 41349 41879 41510 32948 42415 34286 42496 35402 41773 35648 41464 35419 41936 34107 42267 35117 42360 41972 42775 42001 42768 41176 34446 42416 42917 33160 33245 32377 32771 32736 32832 41760 33853 42631 33744 42571 33906 32536 32449 33861 41479 34346 42288 34377 41088 35872 41587 35045 32619 34356 40346 34919 40488 34720 40238 35890 41382 35563 41899 34325 42509 32864 42898 34033 32539 40960 33665 41715 33856 34631 40866 35856 40229 36621 39725 35665 40821 35852 41882 34791 42313 34608 41473 42866 42713 42752 42835 35478 40324 36566 39988 35298 39657 36377 39600 36425 41760 34311 41751 33534 42132 34360 41625 36302 40520 36640 40261 36201 38512 36864 41139 34539 41813 34061 41243 42944 42409 36199 40128 35626 38969 36729 41569 34884 42593 42891 42246 35602 41106 35875 38560 36228 41016 34948 41312 35066 40962 36183 39008 36743 39201 34160 40044 34816 41552 33445 40386 36679 39095 35253 39674 35270 41472 34407 41316 43192 41115 35397 39675 35206 40661 35203 40272 34699 39862 36646 38548 34518 38725 35275 42657 33166 39671 36119 39728 34612 38593 34770 41538 34681 39744 35968 40312 35315 39691 35440 41303 34128 40923 34695 39544 35323 38707 33715 41944 34125 40757 35521 39792 34005 40599 33432 41859 33607 40832 36214 34359 32893 42317 33514 40397 34185 41056 24627 34849 30249 34220 29931 30323 37216 33909 39620 39441 35172 40102 39320 40509 35880 26524 34690 32645 36481 36736 33360 37645 33089 33334 33006 41962 34780 42192 35385 34481 33377 36923 33100 39616 35133 33416 35422 35537 37652 34481 38800 38644 34742 35585 32496 42528 35907 37910 34896 40513 33269 34360 33125 41930 33056 42397 34272 39660 33895 32864 42320 37047 34992 35908 41152 36914 42520 36357 40016 36786 38983 39803 34216 34631 42137 36017 41333 35408 33434 42156 34377 33280 33501 41748 33374 42133 43145 34704 32692 35808 41107 34866 42176 34752 34393 41366 33857 34204 42258 34484 34198 34343 33052 34232 33664 33956 41732 34457 32658 33764 39757 35493 33160 33732 40066 36504 42984 34885 39563 34880 32468 35372 32951 42912 40704 36294 33945 35485 41299 33033 41568 35785 33018 35144 39088 35142 42593 36780 41745 33432 41184 36145 33096 34360 38852 35018 42658 36630 40976 42753 43136 36336 41080 34216 41344 36992 40753 33347 41584 37206 40043 32749 41369 37159 40768 34147 42446 36136 42772 36097 42349 34664 39687 36378 41671 33268 42140 36984 37390 36549 42274 34970 41604 37000 41060 
23543 24189 23703 24040 23600 23992 23680 24039 23633 23927 23511 24195 23586 23938 23624 24057 23680 23958 23736 23920 23704 24060 23633 24173 23591 24123 23589 24040 23509 24090 23615 24048 23582 24033 23682 23840 23614 24042 23633 23839 23755 23985 23639 23907 23783 23941 23577 23917 23721 23927 23570 24096 23611 23904 23677 23973 23656 23906 23853 23879 23545 24023 23712 23851 23601 24005 23695 24006 23758 23905 23538 24077 23615 23921 23618 23812 23615 23970 23689 23825 23608 23970 23660 23831 23790 23769 23732 23933 23528 24064 23638 23815 23978 23886 23540 24086 23593 23655 23851 23796 23778 23847 23687 24172 23786 23555 24023 23764 23740 23849 23621 24166 23584 23744 23724 23652 24137 23729 23536 23913 23540 24153 23648 23641 23882 23689 24103 23765 23616 23853 23676 24164 23906 23504 23964 23571 24093 23560 24019 23834 23937 23648 23844 23782 23848 23721 24028 23623 24020 23936 24256 23712 24192 23956 24291 23691 24217 23740 24338 23759 24177 23707 24279 23657 24185 23751 24288 23784 24170 23729 24213 23872 24046 23755 24192 24009 24267 23913 24074 23859 24283 23744 24012 59 15708 17828 18565 18638 19260 19209 19684 19495 19687 32055 27845 26438 26054 25113 25424 24914 25254 24753 25085 24576 24806 24593 24632 24823 24589 24303 24736 24283 24367 24173 24486 24352 24434 24275 24352 24134 24503 24134 24140 24069 24364 24321 24260 23932 24225 24094 24504 24269 23941 24052 24301 24169 24410 24073 24092 24151 24170 24316 24252 24034 24143 24001 24368 24251 23940 23911 24028 24234 24352 23864 24036 24099 24311 23861 24013 23981 24492 23817 23913 24023 24340 23849 23967 24362 23913 23923 24413 23936 24050 24104 23960 24088 23861 23980 24304 23851 24268 24010 24051 23885 24135 23885 24156 24129 23917 24289 23840 24288 23719 24258 23681 24342 23793 24276 23966 24176 23985 24101 23990 24099 24044 23873 23970 23872 24005 23869 23964 24055 23924 24144 23854 24181 23324 24176 23537 24145 23801 24186 23768 24175 23603 24219 23687 24306 23703 24269 23792 24246 23703 24233 23792 24204 23887 24133 23924 24055 23837 23948 23900 24049 23981 24165 23904 24424 23873 24105 23849 24073 23938 24160 23938 23888 23907 24244 23881 23972 23829 23936 23814 23914 23846 24007 23910 24075 23936 24113 23890 24005 23849 24052 23843 16293 18760 19856 19937 20502 20247 20840 20438 21041 20552 28076 25815 25939 24921 25321 24665 25024 24279 24836 24137 24754 24206 24650 24256 24439 24246 24257 24173 24311 24151 24389 24090 24478 23906 24503 23740 24536 24007 24298 23910 24084 23772 24271 23723 24388 23737 24316 23861 24301 23973 24183 23840 24320 23775 24285 23621 24167 23789 24106 23831 24068 23827 24308 23797 24226 23768 24268 23897 24247 23752 24208 23702 24321 23660 24083 23635 24132 23797 23527 23683 24151 23636 24246 23642 24188 23876 24173 23729 24263 23676 24098 23710 24038 23799 24055 23822 24224 23870 24099 23898 23960 23726 24177 23719 24096 23798 23973 23778 23964 23744 24155 23659 24028 23876 23961 23744 24045 23772 23990 23728 24182 23703 24037 23841 23673 23734 24199 23815 24039 23887 23888 23745 24051 23662 23904 23780 24096 23704 23997 23895 23814 23767 24013 23797 23942 23877 24224 23550 23980 23995 23756 23824 24085 23797 23945 23730 24209 23587 23862 23938 23996 23632 23956 24100 23845 23680 24064 23872 23812 23818 24311 23580 23758 23821 24105 23616 23903 24128 23893 23690 23918 24096 23725 23744 24158 23811 23820 23757 24218 23611 23748 9149 19851 20308 20928 21225 21472 21284 21467 21793 21604 27991 25639 25241 24487 24324 24437 24393 24278 24551 24138 24249 24019 24340 24169 24033 23917 24301 23918 24096 23959 24193 23945 24251 24117 24256 23851 24024 23996 24193 23829 24000 24065 24164 23705 23994 23999 24126 23713 24049 23988 24147 23729 23994 24007 24187 23725 24027 23904 24213 23656 24046 23968 24236 23623 24109 23837 24172 23735 23952 23983 24172 23688 24031 23802 24200 23654 24040 23913 24211 23557 24653 23891 24151 23700 23836 23783 24169 23775 23974 23722 24152 23826 23881 23596 24277 23777 23931 24055 24256 23793 24123 23575 24135 23721 24198 23448 24060 23751 24162 23442 24108 23721 24295 23433 24064 23771 24225 23545 24025 23783 24171 23571 23429 23804 24202 23700 23848 23672 24134 23797 23937 23628 24216 23801 24122 23564 24260 23708 24150 23479 24101 23561 24145 23569 23991 23566 24141 23670 24082 23574 23996 23709 23900 23554 24009 23660 23991 23917 23898 23692 24125 23439 23978 23592 24151 23562 23783 23493 24126 23656 23856 23552 24021 23632 24060 23581 24001 23517 24117 23457 23860 23661 24004 23682 23895 23588 23976 23746 23895 23661 23935 23669 20357 21248 21915 21814 22422 21999 22608 22029 22516 34584 25308 24407 24321 24192 24147 23829 24112 23947 23961 23696 24102 23859 23992 23636 24071 23868 23890 23649 24002 23792 23984 23693 23968 23642 24007 23787 24216 23603 23914 23877 23915 23671 23994 23987 23650 23768 23956 23790 24246 23847 24033 23554 23920 23964 23846 23606 23856 24008 23776 23693 23901 23953 23767 23709 24195 23500 23705 23822 23995 23740 23784 23984 23731 23592 23976 23623 23674 23784 23955 23688 24105 23552 23769 24113 23719 23861 23559 23713 23658 23795 23766 24037 23730 23844 23786 23717 23572 23911 23776 23780 23799 24075 23513 23949 23729 24102 23587 24009 23828 24021 23543 23781 23685 23975 23904 23974 23869 23969 23744 23893 23709 23753 23633 23696 23480 23649 23607 23796 23652 23729 23641 23921 23671 23925 23671 23987 23764 24020 23713 24088 23753 24179 23681 24075 23679 24117 23756 24012 23655 23830 23552 23714 23587 23924 23737 23996 23799 24045 23598 23779 23539 24087 23748 24072 23658 23949 23511 24024 23709 24110 23527 23831 23595 24116 23699 23911 23421 24072 23663 23919 23336 24084 23720 23965 23296 24105 23680 23959 23525 24103 23613 19621 22307 23159 22446 23180 22804 23175 22674 23302 22714 25130 24021 24186 23638 24180 23616 23951 23751 23994 23565 24153 23581 23981 23732 23940 23633 24132 23472 24176 23653 24008 23703 23852 23671 24088 23416 24129 23427 24201 23473 24002 23456 23837 23617 23916 23594 24032 23445 23944 23538 24053 23488 24080 23517 23779 23609 23204 23607 23856 23759 23975 23510 23951 23400 24004 23360 24067 23448 24123 23449 24169 23453 24026 23452 24069 23528 24054 23488 23996 23488 23925 23585 23888 23605 23858 23556 23905 23575 23880 23557 23929 23575 23937 23499 23989 23567 23949 23580 23974 23480 24023 23545 23879 23529 23865 23498 23847 23522 23941 23605 23939 23701 23907 23651 23832 23671 23784 23680 23867 23655 23759 23614 23869 23637 23671 23648 23837 23619 24118 23525 24027 23897 23904 23546 23827 23621 23844 23789 23705 23848 23765 23656 23644 23692 23888 23616 23955 23661 23833 23553 23800 23715 23687 24057 23708 23738 23525 23616 23939 23576 24124 23748 23714 23576 23689 23925 23744 23831 23583 23630 23841 23581 24058 23639 23808 23686 23696 24023 23697 23778 23681 23725 24017 23557 23883 23557 23771 23681 23680 23868 23617 23927 23507 23883 23735 23149 23664 23738 23792 23937 23690 24053 23429 23969 23680 23832 23799 23607 23749 23791 23567 23898 23442 23912 23607 23791 23711 23893 23744 23841 23631 24019 23430 24017 23570 23929 23748 23818 23777 23900 23555 23993 23585 24064 23607 23869 23695 23725 23696 23808 23573 23969 23732 24032 23458 24050 23633 24409 23632 23719 23644 24008 23485 24117 23344 24018 23632 23969 23627 23708 23649 23997 23576 24064 23393 24093 23503 23978 23629 23720 23636 23960 23495 24104 23304 24100 23401 24006 23639 23794 23585 23996 23479 24080 23344 24034 23639 23909 23694 23725 23661 24039 23511 24021 23396 24068 23641 23815 23636 23895 23552 24155 23220 24155 23537 23864 23434 23880 23522 24057 23169 23980 23491 23840 23606 23780 23415 23867 23480 24064 23617 23856 23509 23915 23618 23831 23473 23777 23437 24001 23383 24017 23405 23871 23405 23881 23561 23897 23439 23788 23478 23941 23421 23968 23397 23861 23424 23856 23646 23795 23513 23748 23510 23957 23431 23950 23500 23853 23525 23879 23655 23693 23589 23879 23527 23976 22938 23872 23463 23759 23672 23881 23559 23795 23508 23948 23471 23835 23425 23830 23673 23754 23544 23692 23566 23911 23535 23893 23457 23891 23794 23744 23680 23598 23569 23936 23513 23812 23443 23751 23742 23696 23760 23782 23591 23829 23552 23971 23808 23785 5686 15025 16577 16955 17500 17764 17948 18501 18325 18893 30615 27918 26265 26170 25232 25397 24835 24999 24597 24453 24743 24386 24622 24437 24216 24674 24241 15494 18939 19467 19701 20536 20290 20370 20518 20872 20513 28267 26176 25652 25431 24953 24826 24659 24850 24570 24630 24140 24576 24370 24646 24397 24483 24120 18713 20285 20939 21106 21607 21608 21782 21736 21925 33671 26437 25337 25015 24709 24707 24389 24544 24212 24524 24160 24440 24125 24356 24162 24391 24110 24427 21072 22160 22078 22458 22369 22614 22501 22684 22496 27858 24898 24741 24293 24322 23931 24289 24003 24404 23991 24452 24023 24459 23946 24221 23788 24064 19580 22893 22874 23285 23031 23356 22871 23061 22900 23404 25045 24658 24048 24280 23695 24222 23959 24352 23919 24167 23863 24176 23823 24316 23808 24189 23571 24236 23854 24304 23714 24001 23798 24310 23865 24079 23561 24201 23799 24250 23700 24018 23781 24222 23720 23995 23717 24231 23808 24291 23632 24222 23791 23928 23727 24249 23623 23942 23664 24146 23567 24019 23748 24116 23596 23895 23794 24042 23703 24248 23576 23981 23590 24117 23683 23872 23797 24083 23553 24178 23596 23920 23706 24093 23445 24138 23577 24007 23593 24041 23543 23969 23597 23932 23738 23954 23676 24126 23649 23912 23724 23974 23543 24081 23587 24009 23565 23912 23693 24002 23557 24056 23660 24055 23604 24107 23789 23934 23638 23949 24033 24060 23656 23831 23543 23783 23796 23906 23610 23929 23658 24053 23573 24067 23702 23956 23655 23895 23704 23818 23744 23979 23456 23836 23860 24077 23569 24071 23660 23816 23734 23787 23808 23824 23929 23798 23855 23873 23703 23895 23508 23887 24144 24096 23607 24030 23741 23927 23661 23689 23695 23626 23757 24231 24096 23767 23970 23719 23854 23808 23725 23836 23541 23774 23587 23911 22952 24072 23660 24122 23515 24077 23617 24002 23722 23869 23636 23880 23722 23607 23648 23660 23658 23613 23833 23637 23941 23463 23858 23410 23907 23536 23981 23557 24004 23465 24004 23457 24064 23602 24024 23584 24054 23516 24043 23609 23976 23695 24007 23672 23992 23802 23961 23767 23938 23789 23847 23790 23835 23751 24064 23653 23767 23739 23761 23765 23936 23702 24043 23607 24074 23322 24013 23575 24044 23491 24038 23666 23950 23712 23929 23702 23890 23639 23904 23739 23940 23639 24105 23464 24073 23366 24028 23467 24146 23559 23970 23703 23864 23696 23827 23623 23952 23621 24070 23464 24163 23426 24103 23438 24182 23552 24043 23666 23932 23605 23924 23540 24015 23544 24094 23290 24140 23523 24004 23661 23861 23656 23817 23698 23996 23504 24057 23370 24098 23648 23906 23648 23824 23653 24065 23480 24108 23387 24068 23590 23982 23472 23808 23527 24096 23385 23907 23465 23926 23575 24016 23598 23965 23402 23974 23707 23880 23602 23848 23544 23948 23604 24065 23342 23889 23405 23944 23621 23859 23461 24085 23488 23918 23360 23918 23653 23729 23438 24030 23443 23899 23388 23950 23685 24337 23524 24000 23463 24004 23472 23863 23622 23819 23480 23935 23512 23828 23451 23880 23655 23865 23621 23929 23461 23878 23587 23823 23601 23732 23576 23923 23415 23896 11969 15707 16462 17495 17473 18022 18022 18414 18244 39778 28582 27145 25835 25799 25285 16249 19039 20135 19994 20564 20484 20794 20497 20999 19862 28552 26499 25877 25428 25256 14257 20596 20980 21540 21723 21593 21702 22055 21561 21962 28314 25799 25294 25264 24577 25020 21107 22178 22630 22536 22438 22599 22352 22951 22394 28292 25437 24761 24854 24407 24396 22629 22867 23303 23047 23191 23422 23099 23415 23201 23142 24598 24384 24273 24203 24348 24117 23896 24464 23879 24344 23847 24357 23785 24305 23964 24263 24032 24087 24087 23971 24027 24274 23831 24225 23894 24146 24065 24124 24023 24158 23793 24246 23978 23965 24010 24251 23762 24188 24033 24044 23669 24292 23960 24056 23660 24192 23832 24160 23436 23987 23893 24128 24001 24080 23589 24129 23905 24243 23710 24149 23731 24212 23872 24169 23680 24076 23776 24221 23724 24208 23671 24192 23848 24101 23488 24156 23725 24265 23659 23888 23799 24209 23652 23922 23744 24213 23623 23885 23770 24216 23582 23959 23681 24304 23576 24108 23784 24111 23590 24120 23796 24561 23698 24183 23733 23912 23856 24185 23456 24189 23792 23936 23716 24276 
22637 22885 23147 23073 22637 22801 22712 23336 22872 22801 22697 23133 23158 23159 23149 22477 22960 22888 23205 22752 22977 22864 23292 22627 22811 22850 23163 22727 22784 22903 23079 22873 22792 22935 23157 22662 22807 22920 23049 22766 22953 22832 23236 22823 22929 22837 23096 22381 23070 22907 22998 22534 23214 22695 22919 22765 23156 22658 23004 22845 23088 22471 23159 22805 22921 22731 23240 22532 23121 22711 22981 22480 23334 22560 22894 22777 23151 22419 23318 22596 22807 22757 23134 22261 23303 22696 22982 22631 23153 22393 23327 22383 23186 22664 23170 22448 23352 22225 23320 22600 22852 22599 23108 22446 23288 22628 23203 22714 22838 22713 23153 22513 23339 22205 23276 22555 23168 22624 22935 22544 23109 22417 23155 22407 23200 22311 23200 22371 22938 22665 23114 22649 23104 22416 23089 22359 23144 22510 23074 22380 22864 22539 23077 22420 22997 22517 23087 22192 23117 22365 23193 22247 23159 22400 23008 22333 23066 22532 22944 22624 22908 22549 23025 22353 22959 22337 22946 22464 23126 22408 23171 22433 23152 22447 22919 22330 22887 22577 22847 22727 22899 22589 22936 22315 23045 22488 5553 8160 9177 10656 11137 12050 12257 43669 39348 35704 32209 30176 29191 28428 27048 26528 25660 25964 25168 25184 24232 24635 24279 24633 23936 24076 23426 24091 23589 23936 23191 23732 23337 23795 23191 23403 22979 23607 23034 23564 22772 23237 22784 23563 22876 23387 22471 23330 22922 23559 22727 23200 22559 23480 22727 23388 22549 23234 22584 23345 22763 23221 22365 23150 22727 23266 22599 23008 22701 23255 22599 22977 22538 23224 22613 23002 22647 23248 22436 23059 22508 23304 22412 23145 22577 23148 22439 23219 22432 23234 22375 23095 22541 23095 22679 22317 22508 22934 22355 22984 22561 23123 22528 23107 22310 23189 22157 23060 22433 23114 22291 23202 22537 23033 22513 23083 22503 22916 22546 22904 22416 22932 22372 22883 22336 22985 22455 23195 22437 23255 22407 23133 22357 23218 22459 23111 22403 23058 22421 23043 22318 23096 23057 23101 22403 23147 22437 23159 22465 23132 22511 23061 22545 22968 22464 22832 22471 22995 22573 22855 22469 22853 22579 22893 22621 22903 22695 22875 22499 22912 22578 22903 22628 23527 22565 22838 22560 22946 22579 22749 22536 22705 22561 22703 22661 22571 22572 22637 22573 768 6231 9401 11147 12743 13425 14529 14468 15675 43034 38779 33675 31819 29063 28423 26784 26649 25287 25633 24599 24709 24238 24243 24278 23811 24084 23856 23657 23467 23367 23401 23235 23804 23057 23650 22923 23368 23254 23052 23387 23257 23041 23216 22794 23516 22798 23257 22721 22969 23264 22929 23040 22919 22703 23370 22748 23173 22912 23059 22880 22855 23168 22777 23004 22871 22816 23063 23150 22699 23210 22559 23259 22807 22988 22880 22747 22979 22943 22741 23072 22609 23137 23008 22986 22998 23040 22785 22987 22683 22939 22831 22704 22851 22985 22731 23192 22642 22887 22864 22979 22488 23041 22651 23021 22697 22732 22696 23227 22409 23195 22722 22723 22880 23168 22455 23135 22760 22769 22631 23233 22624 22951 22661 23034 22592 23160 22601 22849 22789 23113 22340 23204 22707 22797 22530 23166 22502 22974 22688 23161 22386 23205 22615 22983 22493 23210 22521 23208 22647 23178 22373 23272 22568 23008 22511 23309 22516 22878 22637 23333 22200 23040 22583 23235 22314 23220 22632 23020 22508 23221 22611 22818 22535 23178 22501 23393 22689 23168 22328 23001 22663 23175 22279 23232 22622 22951 22377 23344 22534 22928 22346 3622 8566 12175 13504 15577 15737 16790 16853 18111 17536 36623 31784 29856 27320 26913 25529 25717 24330 24837 24147 24411 23527 24029 23489 23649 23117 23783 23080 23579 22903 23631 22908 23571 22747 23488 22713 23248 22865 23432 22723 23269 22664 23465 22433 23203 22592 23403 22471 23183 22692 23312 22656 23100 22691 23296 22535 23080 22587 23276 22491 23012 22597 23241 22560 22899 22696 23195 22672 23047 22628 23223 22567 22972 22555 23151 22531 22960 22603 23155 22530 22983 22551 23141 22595 23563 22530 23149 22567 22950 22551 22873 22609 22758 22492 22953 22855 22874 22528 23027 22877 22985 22640 22867 22675 23089 22388 22902 22681 23181 22369 22870 22522 23079 22466 22679 22633 23360 22603 22733 22529 23203 22498 22779 22530 23160 22869 22775 22598 22855 23008 22720 22492 22793 23003 22844 21799 22688 22794 23061 22377 22656 22720 23303 22502 22767 22605 23154 22704 22608 22439 22968 22877 22550 22633 23017 22603 22478 22970 22823 23065 22610 22763 22713 23120 22775 22839 22889 23177 22721 22918 22436 22912 22846 22989 22615 22900 22848 22986 22785 22643 22662 23047 22833 22771 22754 22928 22823 23022 22436 22965 22785 23150 11527 14639 16173 17892 18013 18863 18845 19619 19607 33436 29518 27876 26192 25782 24278 24499 24187 24148 23274 23904 23374 23849 22873 23488 23165 23573 22664 23418 22987 23399 22734 23466 22945 23184 22650 23386 22779 23057 22801 23373 22600 23161 22829 23312 22457 23312 22722 23162 22538 23492 22604 23185 22669 23425 22416 23191 22658 23259 22360 23287 22707 23168 22493 23356 22659 22894 22617 23253 22485 23066 22659 23260 22244 23287 22653 23016 22456 23264 22442 23262 22546 23079 22458 23223 22394 23197 22578 23127 22485 23098 22300 23163 22515 23008 22539 23020 22350 23157 22551 22968 22625 23053 22439 23116 22491 23127 22339 23200 22489 23143 22277 23057 22158 23235 22521 23226 22389 23136 22369 23093 22332 23035 22331 23059 22297 23040 22404 22938 22269 22899 22293 22839 22376 22812 22482 22846 22512 23043 22492 23071 22500 23158 22680 23031 22597 22997 22400 22925 22490 22889 22386 22791 22361 22864 22657 23140 22436 23040 22504 22965 22391 23155 22616 22938 22459 22948 22408 22968 22564 22990 22473 23028 22395 22967 22492 22871 22381 23049 22676 22863 22288 22956 22844 22983 22391 23016 22784 22832 22267 23111 22557 16372 18039 19239 19584 20185 20645 20780 20488 21468 20873 26963 25668 24599 23684 24206 23305 23271 23592 23224 22753 23444 22663 22971 23027 22919 22936 23080 23077 23305 22642 22759 22997 22912 23058 23006 22541 23242 22486 23079 22711 22756 23063 22784 23053 22744 22469 22884 22817 23209 22467 23121 22778 22402 22954 22893 23026 22662 23059 22816 22903 22957 22823 22713 22814 22785 23038 22812 22907 22765 22917 22780 23049 22787 23104 22707 23115 22592 23080 22597 22937 22437 22953 22436 23055 22475 23137 22492 23080 22403 23116 22423 23114 22517 23167 22625 23320 22540 23204 22559 22999 22685 22923 22737 22976 22665 22804 22718 22733 22799 22861 22683 22821 22631 22951 22701 23012 22550 23175 22548 23143 22465 23143 22404 23149 22244 23136 22362 23270 22404 23168 22565 22977 22692 23088 22651 22854 22615 23075 22525 23232 22357 23200 22240 23230 22391 23157 22528 23095 22570 22848 22596 22887 22661 23200 22409 23142 22176 23240 22445 23225 22656 23033 22495 22950 22552 23270 22476 23296 22209 23217 22407 23191 22532 23130 22308 23075 22300 23204 22352 23063 22308 22981 22510 22947 22454 22990 22487 23109 22413 23111 22213 22924 22490 23025 22445 22969 22497 22869 22305 23080 22280 23256 22385 23068 22429 22892 22389 23066 22362 23112 22219 23119 22428 23029 22436 22971 22616 22772 22478 23053 22432 23159 22605 22978 22471 22914 22602 22903 22548 22927 22528 23171 22720 23059 22476 22948 22642 22965 22545 22867 22507 23101 22417 22969 22409 23020 22629 22963 22485 22845 22501 23140 22359 23008 22343 22930 22508 22885 22578 22731 22528 22870 22418 23191 22587 22893 22393 22828 22775 23054 22615 22642 22520 23079 22097 22887 22372 22833 22881 22628 22624 22914 22524 23200 22472 22810 22656 22586 22852 22704 22562 23080 22419 22997 22273 22796 22855 23168 22599 22763 22447 23285 22404 22791 22630 22683 22978 22647 22576 23200 22419 23025 22369 22822 23051 23160 22777 22443 23137 22654 22939 22788 22616 22741 22952 22549 22944 22384 23056 22589 23107 22725 22742 22807 22605 22866 22903 22571 22960 22592 23015 22648 22930 22821 22724 22867 22685 22698 22868 22680 23019 22465 23000 22545 23025 22604 22885 22760 22740 22694 23031 22835 23053 22352 23066 22763 22813 22757 22697 22742 23001 22411 23192 22245 23153 22592 22923 22675 22755 22727 22972 22581 23116 22203 23281 22425 23031 22650 22712 22741 23059 22436 23125 22231 23146 22540 22993 22628 22820 22592 23111 22426 23223 22191 23232 22290 23265 22528 23060 22517 83 93 5138 6949 9405 9651 11464 11482 12822 12627 43668 39088 35643 32229 30891 28716 28440 26679 26989 25700 26077 24896 25169 24270 24729 24115 24485 679 7105 9600 12227 13163 14656 14798 15838 15998 43633 39176 35093 31776 30219 28255 26956 26408 26529 25271 25609 24044 24964 24234 24797 23756 24494 23520 7959 11025 14203 14865 16560 16781 17967 17902 18865 38620 34266 30384 29054 27059 26723 25456 25497 24753 24909 24161 24493 23689 24278 23706 24136 23635 10616 13178 16135 17082 18600 18702 19559 19408 20037 19734 32845 29221 27753 26135 25885 24813 24893 24112 24434 24000 24405 23680 24105 23575 23819 23219 23693 16303 18750 19472 20651 20381 21053 20752 21360 20868 21523 27248 26163 24880 24611 23962 23929 23802 24223 23579 23758 23274 23556 23277 23760 23344 23517 23488 23204 23465 23498 23072 23630 22976 23744 23127 23137 23017 23158 23249 23117 22790 23059 23131 23364 22937 22316 22939 23352 22848 22992 22596 23598 22919 22917 22553 23511 22816 22969 22919 23435 22711 22871 23065 23245 22827 22824 23044 23000 22603 22902 23140 23045 22916 22948 23236 22696 23044 22984 23176 22710 23132 22852 22841 22936 23205 22552 23256 22944 22746 22950 23136 22528 23037 22973 22750 22989 23000 22707 23177 22731 22969 23040 22808 22919 23108 22549 23183 22761 23031 22884 22895 22812 23176 22501 23247 22661 23121 22944 22789 22845 22900 22775 23143 22521 23243 22569 23208 22736 22913 22723 23283 22749 23143 22589 23270 22457 23237 22618 23193 22670 22944 22833 22936 22809 23055 22698 23174 22544 23290 22374 23235 22400 23251 22567 23185 22691 23033 22759 22922 22622 22951 22667 23125 22560 23225 22480 23334 22356 23340 22280 23285 22373 23218 22592 23133 22672 23091 22695 23016 22656 22881 22626 23000 22608 23121 22647 23064 22596 23136 22528 23328 22567 23365 22449 23095 22442 23101 22326 23115 22273 23117 22337 23054 22697 23111 22682 23115 22503 23125 22599 23116 22632 23184 22263 23128 22553 23067 22810 23140 22616 23139 22360 23097 22303 23017 22274 22989 22311 23091 22448 23190 22401 23051 22534 22926 22603 23006 22570 22905 22649 22903 22534 22999 22441 22805 22435 23033 22461 23049 22504 23106 22374 23098 22599 22970 22445 22990 22577 23004 22576 22871 22554 22708 22460 22813 22473 23073 22363 23128 22400 23178 22387 22957 22281 22995 22512 22904 22728 22779 22811 22696 22729 22787 22561 23100 22465 23187 22450 22983 22487 22800 22552 22805 22841 22960 22596 22589 22547 23022 22429 23355 22332 23041 22545 22837 23025 22693 22773 22569 22511 23028 22445 23174 22393 22820 22875 22631 22787 22689 22601 23138 22342 23108 22427 22789 22914 22626 23027 22581 22584 23060 22443 23127 22435 22841 22930 22771 22680 22528 23205 22781 22827 22816 22688 22806 23009 22620 23137 22597 22902 22699 22744 22672 22936 22798 23031 22611 22829 22775 22551 22814 22947 22521 23031 22677 22810 22876 22632 22862 22855 22664 22979 22465 23048 22897 22682 22720 23023 22672 23047 22553 23049 22716 22683 22648 23081 22543 23153 22673 22772 22764 22866 22632 23185 22279 23006 22682 22746 22772 95 2469 6445 7943 9936 10711 11957 12142 13155 43664 42515 37165 33920 31407 30055 4766 9987 12023 13817 14850 15998 15993 17266 16961 43616 40439 36128 32372 31104 28672 8853 12372 15115 16303 18015 17673 19249 18852 19364 19419 37760 32099 31020 28560 28146 13813 15588 17497 19081 19050 20282 19863 20834 20466 21085 33381 30561 28088 27747 25929 26456 19189 20938 20737 21575 21337 22366 21367 22245 21713 29207 26757 26289 24989 25390 24459 24919 24081 24507 23589 24240 23854 24344 23475 24161 23301 24068 23290 23838 23104 23715 23161 23853 22952 23865 22866 23741 23005 23733 23111 23542 22832 23781 22940 23573 22957 23508 22885 23488 22938 23457 22775 23564 22897 23247 22696 23451 22897 23347 22743 23237 22876 23431 22755 23264 22848 23368 22889 23288 22617 23223 22598 23403 22869 23243 22679 23192 22745 23279 22816 22993 22537 23411 22724 23138 22695 23003 22900 23164 22640 23085 22885 23273 22652 23152 22913 23264 22715 23101 22995 23143 22615 22904 23149 23065 22514 22821 23152 22930 23104 23256 22726 22767 22704 23309 22637 22777 23203 22865 22521 23245 22676 22893 22967 22952 
