# Supplementary material for: An Active Feature Selection Strategy for DWT in Artificial Taste
Source: Hindawi journal article supplement (doi:10.1155/2018/9709505), 2018-01-01
Supplement: f1 [file 9709505.f1.zip › redWine-low-3.txt]

43440 43448 43456 43447 55 8189 17117 19877 21805 22000 22932 22931 23460 23048 23865 23401 23831 23451 24137 23533 24072 23712 24130 23683 24069 23826 24202 23616 24099 23895 24209 24261 24311 23917 24195 23584 24295 23841 24096 23869 24256 23853 24017 24102 24320 23829 24141 23972 24140 23759 24365 23941 23927 24258 24292 23997 24523 24000 24041 24272 24260 23812 24327 24030 24088 24220 24321 23858 24420 24021 24183 24353 24232 23844 24556 23953 23946 24388 24075 23898 24352 23863 24281 24006 24015 24444 24088 23872 24313 23840 24384 24096 24343 24357 24029 23976 24309 23941 24457 24019 23965 24338 24115 24003 24249 24136 24082 24404 23875 24455 23831 24454 23980 24406 24046 24213 24040 24293 23991 24533 23752 24486 23943 24461 24080 24256 24236 24010 24250 24296 24246 24329 24092 24509 23883 24548 23812 24500 24334 24481 24030 24429 24112 24415 24130 24265 24029 24269 23992 24322 24162 24285 24096 24432 23968 24456 23986 24404 24020 24535 23868 24676 23744 24576 23790 24508 23649 24609 23663 24493 23758 24596 23770 24647 23677 24533 23653 24602 23685 24546 23715 24616 23654 24560 5844 19181 20003 21813 21106 22519 21639 22777 21876 22968 32104 28124 25513 25847 24577 25225 24327 24977 24145 24849 24124 24669 24093 24656 24076 24577 24159 24548 24030 24693 24103 24681 24021 24394 24032 24360 23813 24497 23865 24576 23879 24706 23856 24626 23784 24660 23816 24508 23808 24519 23645 24355 23794 24432 23879 24380 24094 24512 23959 24378 23909 24425 23772 24362 23728 24340 23693 24590 23774 24528 23776 24584 23527 24496 23778 24396 23841 24391 24026 24299 23966 24310 23853 24313 23820 24407 23860 24455 23833 24498 23855 24381 23863 24288 23968 24235 24092 24330 23947 24201 23913 24420 23868 24577 23850 24289 23844 24328 24050 24188 24015 24229 23944 24448 23772 24424 23850 24281 23981 24308 24039 24098 23993 24086 24039 24469 23892 24422 23795 24232 24156 24072 24232 23950 24121 24377 23936 24435 23840 24125 24298 24050 24069 24148 23996 24528 24037 24242 23868 24123 24420 24065 24051 24302 23892 24520 23773 24195 24344 24011 24215 24019 23959 24537 23831 24290 24040 24145 24504 23888 24085 24400 23942 24386 24064 24053 24390 24115 24400 23848 24313 24033 24081 24098 24465 24257 24499 23999 24311 24119 24193 24078 19290 21200 22486 22423 22894 22849 22880 22829 23288 35008 27678 25510 25532 24672 24650 24341 24760 24152 24696 24260 24325 24171 24437 23949 24653 23863 24664 24172 24389 24205 24564 24105 24597 23904 24547 24150 24232 24151 24603 24026 24677 23895 24437 24012 24269 24000 24519 23599 24631 23920 24356 24028 24407 23841 24539 23846 24529 23968 24264 24021 24586 23623 24592 23952 24568 23960 24545 23735 24608 23776 24463 23916 24320 23840 24686 23517 24690 23878 24359 24036 24476 23851 24608 23926 24423 23964 24444 23846 24528 23757 24512 24068 24230 24013 24668 23688 24691 23943 24518 24045 24668 23466 24569 23904 24413 23661 24444 23821 24536 23670 24481 23936 24428 23892 24565 23769 24459 23915 24298 23955 24228 23738 24397 23655 24378 23785 24224 23738 24551 23664 24290 23796 24320 23786 24381 23747 24500 23648 24373 23789 24226 23761 24501 23656 24392 24056 24314 23863 24264 23773 24401 23794 24297 23904 24138 23845 24480 23979 24250 23961 24228 23863 24365 23725 24357 23810 24280 23886 24236 24102 24041 23894 24160 23961 24314 23837 24396 23812 24423 23893 24394 23866 24385 23856 24260 23943 24104 24039 24367 23960 24182 17314 21980 22377 23344 23054 23115 23417 23495 23056 23717 27161 25046 24952 24689 24240 24749 24196 24313 24148 24460 24076 24132 24354 24295 23950 24120 24516 24224 23969 24391 24306 24091 23905 24470 24095 24152 23877 24568 24128 24044 24018 24532 24040 24008 24267 24192 23937 24044 24340 24156 23825 24582 24022 24039 24167 24279 24039 23752 24192 24015 24101 24142 24512 23629 24473 24096 24244 24089 24378 23761 24429 24119 24167 24066 24365 23826 24503 24168 24116 24139 24302 23941 24343 24096 24272 24110 24247 24037 24439 23687 24509 24103 24227 24051 24422 23965 24565 23802 24480 23968 24211 24136 24333 24088 24585 23751 24448 23846 24384 23969 24177 23972 24422 23971 24512 23698 24496 23673 24538 23922 24352 24039 24160 23981 24167 23925 24423 23823 24612 23744 24714 23807 24683 23787 24610 23845 24501 23895 24362 23842 24285 23831 24605 23928 24485 23831 24576 23846 24617 23664 24567 23681 24512 23639 24592 23801 24471 23961 24437 23971 24305 23776 24379 23741 24339 23777 24907 23861 24289 23824 24304 23914 24398 23868 24431 23849 24424 23849 24361 23722 24361 23702 24500 23697 24439 23077 24408 23672 24451 23625 24588 23756 22449 22727 23700 22966 23912 23149 23968 23232 23865 27844 25488 24200 24665 23981 24586 23904 24551 23900 24413 23849 24551 23960 24422 23845 24467 23786 24462 23823 24376 23815 24496 23817 24469 23754 24551 23871 24409 23765 24472 23832 24380 24193 24456 23893 24426 24122 24289 23856 24304 23745 24270 23727 24224 23737 24227 23809 24189 23881 24120 24019 24065 24294 24048 24360 24060 24295 24021 24032 23937 23979 24139 24023 24341 23991 24536 23828 24549 23966 24210 23739 24142 23887 24083 24240 24049 24321 24096 24186 24016 24379 23760 24495 23942 24365 24039 24780 24104 24160 24152 24073 24181 24305 24064 24292 24049 24252 23801 24441 23924 24462 24060 24240 24117 24258 23936 24135 24139 24341 23904 24452 23893 24419 23684 24515 23750 24592 23882 24404 23926 23804 24039 24180 24064 24397 23905 24517 23792 24479 23666 24605 23719 24640 23844 24426 23924 24412 23869 24293 23863 24570 23066 24672 23537 24664 23820 24419 23975 24307 23974 24400 23958 24519 23692 24480 23587 24583 23821 24422 23919 24256 23879 24513 23580 24517 23554 24554 23824 24416 23784 24209 23683 24489 23745 24495 23808 24260 23850 24338 23913 24457 23660 22558 23122 24195 23300 24028 23336 24112 23555 23954 23675 24973 24034 24480 23835 24577 23908 24243 23946 24288 24007 24179 23851 24391 23755 24423 23840 24293 23838 24172 24005 24147 23922 24379 23825 24350 23696 24327 23943 24235 23986 23975 23911 24484 23904 24327 23925 24098 24225 23881 24111 24309 23901 24353 23680 24089 24131 23962 24176 23986 23953 24589 23977 24245 24136 24001 24295 24012 23994 24357 23799 24284 23889 24069 24345 23976 24020 24180 23921 24151 23941 24233 24288 23920 24416 23820 24448 23978 24104 24060 24244 24064 24424 23733 24407 23989 24194 24028 24049 24189 24320 23928 24517 23773 24333 23932 24288 24128 24352 23912 24381 23640 24480 23754 24340 24014 24224 24024 24390 23956 24468 23883 24508 23705 24571 23688 24468 23829 24425 23889 24404 23848 24409 23906 24221 23891 24368 23872 24412 23826 24485 23764 24512 23832 24505 23847 24503 23928 24341 24036 24252 23968 24281 23922 24480 23835 24590 23802 24448 23623 24589 23645 24465 23675 24429 23803 24425 23721 24524 23660 24453 23632 24396 23810 24463 23648 24530 23762 24834 23872 24357 23779 24340 23911 24320 23741 24072 23913 24321 23849 24193 23669 24374 23836 24297 23832 24300 23900 24261 23841 24205 23971 24250 23744 24069 23909 24235 23741 24256 23852 24183 23826 23964 24132 24215 23890 24217 24116 24252 23777 24392 24092 24044 24148 24267 23917 24365 23937 24076 24216 24065 23795 24430 23974 23862 24359 23991 23958 24165 24217 24498 23879 23985 24121 24247 24330 24008 24246 24049 23868 24263 24116 24085 24288 24038 24278 23987 24436 23919 24372 23799 24327 23724 24375 23826 24456 23834 24342 23730 24353 23734 24490 23720 24474 23852 24529 23735 24485 23911 24426 23984 24320 23887 24257 24002 24209 23959 24243 23918 24259 23892 24461 23818 24554 23668 24564 23842 24343 23873 24280 23920 24390 23799 24536 23608 24581 23576 24556 23789 24453 23898 24360 23925 24476 23794 24466 23829 24417 23879 24205 23941 24598 23617 24522 23664 24305 23879 24347 23637 24497 23659 24361 23831 24258 23753 24411 23658 24421 23842 24055 23697 24480 23799 24487 23873 24426 23584 24428 23436 24365 23853 24145 23671 24408 23768 24247 23910 24294 23889 24461 23732 24224 23904 24050 23828 24400 23715 24149 23908 24147 23788 24259 23822 24192 23936 24305 23752 24263 23908 24208 23974 24300 23891 24256 24217 23927 23928 24349 23847 24105 23984 24168 23814 24253 24033 23920 24013 24425 23730 24220 24218 23861 24010 24406 23707 24090 24277 23977 23785 24213 23880 14910 20074 21320 21563 21832 22294 21902 22569 22240 43440 29291 26760 25247 25216 24728 24826 24312 24844 24320 24178 24244 24567 24173 24412 24357 24416 24205 19618 21792 22454 22533 23244 22684 23256 22968 23435 34784 27520 25492 24960 24503 24934 24268 24877 24368 24750 23795 24548 24055 24457 23950 24749 24092 7828 21039 23056 22657 23475 23100 23760 23029 23964 23210 29552 25416 25417 24192 24755 24200 24713 23808 24657 24151 24645 23772 24721 24087 24297 23910 24652 18071 22950 22825 23953 23195 23867 23280 24053 23075 23862 25988 25219 24204 24721 24220 24314 23863 24406 23908 24568 23815 24628 23865 24519 23827 24635 23749 22464 23143 24055 23389 23988 23503 24053 23637 23972 23635 25015 24094 24531 24193 24352 23961 24305 24001 24384 23945 24441 24007 24311 23919 24423 23761 24271 24024 24466 23968 24188 23986 24377 24214 24288 24121 24193 23744 24283 24104 24025 23859 24352 24261 23985 23956 24309 24029 24247 24040 24407 23881 24008 24035 24623 23844 23912 24009 24497 23962 24049 24102 24352 23970 24059 24327 24289 24060 24023 24448 24212 24226 24148 24412 24230 23502 24090 24288 23872 24355 24214 24368 23783 24264 24107 24423 23744 24393 24058 24391 23847 24300 24093 24280 23808 24292 24120 24311 24024 24343 24081 24271 23952 24536 23956 24064 23948 24510 23928 24384 24048 24448 23876 24294 23998 24389 23635 24327 23916 24472 23714 24535 23888 24249 23793 24560 23953 24253 23901 24517 23873 24156 23872 24576 23821 24409 23985 24516 23552 24455 23880 24320 23761 24576 23572 24515 23858 24227 23973 24599 23160 24545 23697 24441 23926 24188 24042 24364 23763 24467 23656 24561 23863 24204 23730 24336 23633 24596 23620 24382 23815 24377 23726 24423 23672 24512 23602 24288 23860 24200 23821 24320 23822 24481 23655 24484 23829 24343 23670 24326 23574 24424 23562 24423 23904 24373 23667 24272 23717 24476 23738 24256 23856 24195 24002 24006 23840 24401 23720 24358 23993 24179 23798 24292 23936 24177 23884 24262 23860 24163 23875 24384 23772 24272 23801 24200 23911 24222 23924 24260 23906 24177 23829 24375 23698 24237 23976 24164 23883 24289 23738 24306 23878 24176 23962 24128 23728 24184 23995 24007 23975 24261 23892 24109 24128 24216 23984 24421 23979 24129 24248 23993 23874 24427 23857 23939 24142 24160 23859 24119 24292 23936 23814 24268 23964 24049 23995 24495 23822 23879 24120 24321 23988 24133 24221 23905 23867 24253 24320 23842 24507 24007 24151 23833 24473 23867 24180 24012 24439 23752 24041 24071 24392 23783 24188 24075 24334 23831 24189 24169 24254 23726 24236 23992 24269 23793 24284 24013 24334 23701 24343 23985 24326 23668 24418 24064 24225 23865 24493 23965 24362 23674 24503 24017 24307 23759 24480 23904 24192 23896 24536 23992 24238 23709 24440 23968 24221 23776 24530 23821 24100 23912 24583 23904 24109 23798 24480 23804 24172 23803 24570 23921 24179 23842 24494 23889 24094 23771 24541 23829 24213 23777 24640 23815 24216 23699 24608 23830 24229 23651 24613 23824 24321 24151 24606 23857 24405 23648 24465 23895 24464 23647 24439 23884 24424 23577 24359 23899 61 18288 21513 21324 22265 21768 22291 21789 22589 22016 34200 27545 26085 24865 25160 24292 19674 21543 22878 22360 22760 22674 23379 22972 23192 35426 27528 25400 25292 24201 24794 18384 22763 22608 23362 22937 23671 22947 23921 22904 23691 26534 25510 24518 24785 24097 17908 22396 23564 23291 23654 23223 23868 23497 23941 23333 26656 24753 24817 24377 24372 24036 23417 23415 24105 23552 23623 23667 23996 23846 24018 26198 24707 24116 24596 24132 24432 23913 24384 23920 24495 24002 24315 23879 24357 24034 24341 23735 24284 24001 24315 24021 24300 24069 24129 23942 24565 23958 24084 23875 24269 24168 24250 23864 24277 23895 24252 24293 24221 23777 24089 24009 24261 24273 24078 24263 24072 24024 24617 24038 23991 23892 24193 24156 24433 23977 24197 23831 24130 24304 24263 23802 23954 23952 24105 24295 24183 23769 23982 24015 24312 24430 24119 24016 24002 24040 24096 24448 24193 23783 24001 24407 24147 24362 23866 24030 23944 24435 24039 24462 23913 24096 23892 24375 24037 24374 23988 24071 23949 24373 24128 24263 24021 24071 23889 24349 24032 24417 23913 24057 23872 24437 24043 24484 23840 
21088 20648 21337 20886 21220 20645 21195 20847 21308 20753 21390 20641 21260 20861 21301 20632 21176 20819 21164 20804 21175 20712 21045 20759 21311 20709 21239 20894 21137 20600 21167 20973 21053 20787 21469 20586 21125 20772 20167 20432 20177 20869 20028 20670 20327 20775 19845 20941 20260 20629 20196 20946 19442 20865 20284 20877 20064 21005 20137 20840 20216 20968 20088 20994 20326 20787 20414 20865 20101 20999 20292 20741 20426 20932 20336 21137 20325 21000 20524 20685 20378 21058 20110 21171 20253 21031 20311 21010 20295 20971 20080 20951 20103 21130 20340 20895 20416 20920 20399 20993 20239 21007 20251 20944 20356 20593 20695 21015 20180 20908 20216 21102 20321 21078 20292 21027 20410 21010 20288 21095 20358 21111 20189 21155 20279 21003 20416 20976 20526 20951 20452 21011 20494 20987 20328 20907 20382 21018 20407 21139 20457 21005 20588 20929 20586 20801 20535 20911 20597 20558 20663 20951 20585 20902 20556 21042 20563 21031 20553 20996 20556 20953 20459 20944 20439 21043 20480 21025 20328 21088 20439 21124 20398 21083 20663 20993 20552 21117 20775 21194 20295 21120 20362 21127 0 61 2185 5259 6181 7980 8216 9541 9654 10768 34403 27939 24285 23144 21894 21888 21070 21268 20825 21254 20839 20906 20895 20858 20948 20730 20938 20807 20927 20705 21104 20608 21128 20491 20992 20654 20864 20513 20745 20589 20693 20837 20660 20945 20775 20992 20650 21036 20551 21203 20753 20992 20896 20791 20679 20874 20718 20832 20811 20836 20962 20622 21091 20939 20979 20505 21005 20498 21047 20677 20934 20871 20954 20909 20852 20798 20697 20815 20928 20800 21124 20615 21120 20460 21072 20449 21219 20510 21203 20644 21080 20771 20970 20660 20902 20886 20941 20615 21256 20397 21153 20379 21284 20742 21203 20702 20874 20694 21095 20688 21178 20421 21199 20379 21306 20712 20872 20753 20961 20759 21161 20558 21267 20341 21363 20535 21122 20648 21053 20640 21184 20484 21324 20230 21415 20423 21287 20562 21062 20616 21184 20451 21288 20224 21359 20553 21112 20766 20900 20743 21200 20711 21313 20417 21287 20674 21245 20769 21120 20539 21331 20191 21424 20577 21220 20425 21040 20417 21318 20420 21172 20676 21184 20526 21072 20481 21273 19774 21135 20459 21066 20704 20980 20577 21270 20435 21287 20556 21179 20528 21133 58 6535 9481 12005 12503 13824 13701 14505 14182 15320 37344 27809 23853 22868 21641 21773 20973 21479 20602 21269 20783 21205 20637 21117 20568 21267 20561 21232 20776 21223 20641 21253 20685 21136 20590 21024 20753 21021 20569 21223 20503 21129 20664 21063 20648 20888 20656 21237 20469 21080 20576 21075 20697 21037 20650 21227 20584 21025 20893 20807 20691 21184 20594 21020 20935 20999 20902 20901 20584 21134 20424 20906 21082 20764 20689 21376 20566 20896 20921 20860 20784 21161 20576 21072 20824 20907 20915 20935 20604 21277 20560 20939 21180 20737 20752 21203 20851 21003 21072 21206 20859 21072 20585 21072 20827 20781 21089 20706 20750 21270 20608 20905 21095 21201 20860 21052 20932 20982 20776 20954 21112 20439 21293 20833 20810 20839 21181 20819 21192 20721 21149 20879 20889 20812 21267 20584 21248 20920 20849 20994 21099 20737 21174 20847 21047 20903 20967 20731 21120 20551 21349 20941 20988 20887 21312 20565 21363 20661 21199 20791 21206 20641 21321 20462 21440 20802 21100 20768 20905 20823 21068 20695 21307 20628 21417 20592 21524 20621 21388 20569 21338 20516 21400 20456 21459 20474 21433 20732 21423 20640 21186 20864 8478 13401 15532 15577 16978 16384 17393 17031 17611 17277 27445 22952 22401 21241 21670 20700 21608 20749 21192 20807 21604 20640 21227 20781 21397 20566 21313 20801 21328 20541 21477 20937 21177 20549 21403 20705 20842 20608 21434 20774 21143 20617 21504 20405 21288 20653 21242 20342 21386 20584 21288 20745 21248 20512 21248 20769 21303 20462 21312 20716 21054 20951 21304 20565 21309 20526 21437 20646 21337 20321 21384 20543 21376 20766 21309 20472 21329 20586 21210 20617 21153 20440 21340 20586 21137 20743 21063 20706 21184 20596 21255 20778 21005 20809 21207 20660 21093 20695 21240 20598 21051 20701 21038 20791 21184 20560 21406 20705 21175 20786 21013 20800 21059 20744 21228 20470 21146 20584 21223 20844 20996 20801 21255 20888 21044 20910 21031 20753 21117 20647 21281 20771 21261 20673 21100 20897 20921 20903 20886 20962 21153 21207 20787 21122 20929 20753 21144 20583 21083 20625 21253 20804 21367 20736 21315 20736 21035 20918 20855 20933 20887 21103 20800 21151 20860 21285 20813 21160 20794 21041 20960 20858 21011 20700 21073 20924 20998 21031 20941 21296 20796 21179 20929 21208 20828 21235 20903 21167 20971 21217 20919 5821 16142 17831 18135 18752 18688 19146 18754 19329 18948 27662 22415 22016 20988 21628 20864 21532 20817 21475 20686 21473 20787 21399 20861 21506 20682 21418 20704 21403 20808 21457 20692 21381 20752 21382 20731 21376 20842 21255 20722 21312 20855 21297 20764 21248 20793 21360 20838 21454 20691 21425 20784 21732 20750 21366 20658 21335 20775 21139 20816 21127 20873 21290 20800 21249 20647 21456 20784 21393 20614 21427 20466 21513 20600 21466 20560 21562 20736 21206 20678 21217 20633 21242 20564 21255 20627 21390 20585 21381 20568 21157 20632 21259 20580 21240 20775 21273 20738 21074 20605 21207 20520 21345 20562 21352 20506 21429 20619 21252 20608 21125 20776 21196 20800 21233 20717 21157 20669 21260 20789 21208 20661 21207 20720 21168 20646 21277 20666 21125 20870 21056 20839 21033 20725 21272 20675 21373 20583 21287 20369 21283 20681 21236 20682 21113 21000 20763 20970 20800 20939 21309 20711 21289 20653 21161 20814 21019 21161 20784 21032 20888 20823 21272 20645 21328 20593 21089 20932 20941 21132 21175 20903 21127 20694 21409 20896 21027 20871 20892 21226 20833 21020 20709 21396 20960 21084 20976 21016 20853 21205 20759 21369 17489 19963 19704 20148 20028 20233 20277 20101 20148 28881 21917 21625 20837 21512 20834 21324 20907 21015 21022 21349 20823 21247 20527 21504 20864 21120 20907 21044 20853 21388 20614 21483 20654 21367 20855 21224 20837 21272 20678 21412 20547 21606 20771 21337 20787 21143 20797 21481 20433 21551 20535 21464 20775 21078 20828 21309 20828 21449 20494 21488 20759 21171 20844 21095 20823 21492 20593 21703 20709 21395 20650 21196 20581 21497 20563 21337 20523 21255 20631 21114 20691 21360 20678 21331 20472 21328 20631 21211 20517 21280 20583 21464 20551 21275 20686 21233 20697 21069 20759 21357 20563 21287 20640 21121 20826 21158 20681 21267 20656 21235 20581 21178 20760 21200 20785 21374 20727 21032 20736 21312 20747 21175 20844 21200 20562 21141 20829 21091 20961 21031 21011 21007 20900 21159 20864 20916 20934 20981 20976 21079 20873 21205 20751 21248 20721 21211 20821 20978 20864 20887 21111 21340 21365 20935 21173 21040 20722 21163 20828 21323 20821 20827 21032 20820 21132 21209 21103 21022 21370 20619 21341 20786 21210 21022 21072 20823 21266 20943 20964 21094 21271 20869 20951 20967 21279 20852 21122 20960 21386 20996 21126 20694 21466 21007 21341 20658 21291 20834 21244 20596 21281 20860 21518 20865 21291 20856 21514 20743 21230 20882 21543 20676 21297 20793 21333 20407 21474 20706 21382 20593 21537 20725 21283 20762 21410 20531 21407 20755 21178 20836 21338 20728 21440 20758 21431 20923 21197 20659 21431 20704 21394 20416 21319 20541 21476 20641 21225 20637 21250 20728 21403 20765 21242 20818 21281 20641 21248 20591 21321 20530 21331 20506 21255 20736 21301 20426 21278 20703 21271 20627 21299 20609 21264 20672 21273 20807 21255 20653 21234 20764 21145 20865 21159 20937 21216 20744 21047 20813 21125 20701 21385 20663 21219 20535 21216 20696 21218 21038 20811 20872 20960 20905 21251 20883 21180 20675 21136 21217 20934 21013 20891 20812 21309 21126 21310 20823 21037 21255 20878 20905 21248 20743 21261 20584 21069 21248 20772 20865 21335 20952 21115 21127 20970 21150 20908 21120 20904 21276 20771 21306 20659 21177 21109 21178 20851 21201 20826 21074 21054 21085 20280 21293 20826 21166 21084 21287 20595 21424 20801 21279 20949 21277 20672 21373 20871 21319 20917 21284 20473 21516 20951 21147 20859 21474 20610 21271 20822 21254 21145 21581 20719 21345 20878 21413 20554 21543 20761 21105 20730 21509 20491 21443 20848 21254 20679 21457 20608 21315 20857 21207 20720 21545 20751 21257 20816 21533 20509 21526 20812 21211 57 5895 7539 9535 9851 11303 11130 12156 12077 43336 31360 26460 23508 22906 21565 21959 20737 21572 20840 21377 20656 21392 20564 21165 20626 21226 67 7069 11356 13473 14009 15218 15122 15809 15641 16385 38529 28029 24103 22793 21657 21848 21208 21379 20968 21507 20822 21223 20965 21184 20889 21262 20768 976 12647 15912 16295 17234 17459 17994 17510 18187 18245 30208 24162 22722 21641 21554 21271 21706 20839 21029 21116 21431 20711 21280 21162 21009 20928 21361 11513 17026 18061 18949 18631 18887 19053 19617 18935 19366 25392 22273 21600 21627 21332 20853 21528 21036 21319 20637 21518 20935 21180 20992 21339 21005 20956 17707 19779 19805 20079 20139 20319 19857 20271 20122 28974 21890 21729 21138 21491 20654 21425 20983 21144 20992 21568 21008 21125 20816 21447 20860 21207 20992 21463 20623 21287 20839 21444 20608 21239 20893 21431 20466 21361 20882 21324 20447 21431 20794 21401 20456 21613 20786 21319 20683 21651 20746 21159 20695 21444 20666 21152 20821 21481 20791 21104 20801 21407 20621 21200 20923 21510 20668 21366 20528 21399 20530 21213 20669 21439 20714 21248 20666 21474 20617 21196 20816 21312 20534 21208 20516 21393 20372 21213 20520 21401 20519 21292 20761 21414 20630 21243 20625 21270 20495 21345 20768 21147 20608 21336 20769 21016 20710 21266 20744 21565 20812 21302 20626 21120 20719 21250 20634 21207 20687 21304 20761 21072 21020 21091 20660 21276 20813 21061 20776 21128 20952 20999 20653 21301 20736 21127 20970 21328 20695 21074 21045 20920 20730 21303 20628 20969 21186 20998 20840 21408 20645 21253 20754 20994 21195 21001 20902 21147 20711 21399 20737 20963 21217 20904 21220 20887 20903 21346 20879 21066 20910 20858 21163 20782 20841 21423 20967 21131 20954 20923 21239 20658 21315 20898 21421 20897 21237 20817 21336 20594 21329 20935 21224 20995 21148 20967 21219 20658 21384 20941 21221 20920 21104 20957 21281 20696 21322 20771 21443 20803 21172 20932 21184 20994 21129 20841 21308 20790 21429 20564 21383 20668 21404 20859 21495 20781 21066 20870 21374 20713 21447 20512 21510 20855 21216 20973 21258 20648 21394 20589 21437 20773 21185 20691 21441 20496 21405 20697 21284 20655 21504 20563 21430 20801 21255 20630 21441 20649 21317 20839 21431 20489 21527 20774 21049 20752 21414 20482 21428 20821 21366 20672 21581 20784 21244 20455 21504 20643 21165 20496 21427 20674 21383 20644 21479 20647 21190 20718 21271 20503 21324 20912 21133 20699 21250 20664 21413 20686 21478 20599 21223 20544 21480 20557 21159 20581 21548 20440 21219 20599 21446 20503 21208 20638 21387 20564 21251 20701 21320 20579 21204 20702 21315 20744 21184 20895 21210 21127 21249 20849 21162 21249 21100 20878 21267 20721 21231 20846 21170 20726 21197 20978 21053 20675 21220 20853 21063 20637 21209 20747 21079 20717 21269 20820 20998 20671 21319 20810 21118 20681 21216 21017 20849 20764 21261 21011 20995 20801 21293 21008 20917 20824 21177 21084 20800 20645 21207 21095 20810 20833 21204 21204 20936 20627 21169 21127 21211 20625 21087 21006 21341 20780 20937 20983 21271 20704 20810 21008 61 3420 7642 9357 10967 11406 12075 12101 13004 13386 38203 28033 24770 23201 22343 21379 7615 12851 14838 14971 15717 16437 16362 16613 16371 39912 27864 24569 22507 22361 21557 10176 15065 17095 17152 18212 18119 18589 18256 18344 41545 26983 23553 22381 21504 21639 11183 17265 18437 18975 19063 19604 19374 19772 19337 19463 25529 23099 21862 21734 21117 13180 18858 20327 19823 20247 19968 20681 20362 20465 19927 24533 21986 21907 21231 21497 20871 21548 21069 21657 20909 21239 20992 21556 21000 21535 20832 21175 20837 21611 20965 21424 20613 21511 20895 21594 21005 21336 20653 21413 20982 21589 20704 21232 20691 21624 20829 21664 20571 21328 20653 21639 20809 21353 20505 21301 20898 21486 20835 21225 20663 21447 20894 21466 20776 21242 20510 21431 20916 21468 20728 21073 20731 21597 20802 21532 20567 21280 20471 21493 20636 21488 20696 21097 20641 21296 20701 21474 20668 21129 20581 21363 20649 21425 20807 21168 20583 21315 20666 21444 20640 21209 20488 21341 20533 21511 20711 21137 20531 21309 20687 21328 20722 21088 20597 21307 20701 21431 20822 20999 20659 21222 20757 21306 20744 
21369 21613 21504 21827 21188 21639 21516 21655 21560 21773 21545 21472 21561 21784 21252 21677 21472 21726 21284 21844 21464 21498 21419 21793 21440 21717 21491 21818 21236 21650 21381 21764 21376 21808 21527 21637 21264 21840 21437 22118 21457 21817 21067 21847 21415 21688 21224 21816 21328 21596 21491 21824 21268 21714 21485 21848 21206 21813 21402 21568 21263 21860 21366 21735 21402 21873 21125 21785 21457 21764 21200 21869 21405 21735 21339 20700 20292 20896 20506 20672 20859 20593 20352 21034 20417 20817 20433 20941 20903 20622 20420 21064 20472 20864 20485 20883 20891 20672 20471 20817 20504 20920 20808 20423 20686 20664 20904 20790 20729 20800 20864 20618 20960 20470 20875 20683 20858 20893 20686 20839 20717 20867 20887 20724 20913 20577 20969 20967 20992 20683 20867 20887 20672 20871 20668 20850 20886 20764 20976 20768 21099 20605 21046 20508 20992 20465 21047 20969 21101 20636 21056 20700 21005 20871 20929 20869 20977 20871 20853 20940 20794 20880 20888 20795 20821 20847 20795 20836 21467 20800 20947 20871 21030 20858 21009 20900 20968 20800 21063 20856 21079 20871 21096 20915 26 1110 3363 4591 5735 6738 7865 8402 9301 35890 23995 22035 21760 21170 21313 21024 21092 20971 21058 20921 21045 21021 21191 20992 21229 20871 21239 20917 21275 20796 21283 20868 21356 20759 21456 20729 21306 20736 21196 20724 21199 20619 21280 20824 21200 21009 21323 20943 21189 21041 21170 20923 20864 20873 21073 20846 21100 20800 21348 20900 21380 20763 21467 20808 21323 20992 21281 20705 21316 20903 21317 21056 21299 20974 21325 20822 21156 20827 21185 20941 21303 20964 21433 20924 21336 20875 21238 20796 21321 21048 21250 21021 21225 20914 21198 20965 21340 20932 21355 20928 21258 20907 21257 21061 21166 20982 21338 20907 21400 20979 21339 21493 21201 20840 21298 21011 21268 21057 21024 20999 21398 20846 21472 20921 21217 21124 21126 21218 21092 21064 21236 20960 21549 20825 21317 21004 21224 21258 21267 21033 21229 20933 21495 20993 21261 21351 21029 21206 21140 21072 21622 20944 21287 20969 21095 21496 21094 21137 21328 20922 21480 20940 21204 21330 21180 21399 21120 21071 21489 20369 21196 21222 21073 21382 21053 20997 21525 21187 21395 21065 21233 21399 20960 21421 21224 21300 21177 21145 21173 21293 21179 5368 12197 13799 14656 15066 15578 16080 15986 16549 16619 25453 22464 21747 21441 21504 21031 21397 21283 21381 21371 21513 21216 21526 21061 21428 21271 21212 21282 21517 21047 21423 21057 21334 21271 21136 21192 21473 20957 21559 21231 21306 21200 21311 21200 21539 20904 21605 21240 21228 21312 21496 21104 21613 21081 21552 21281 21241 21237 21614 20903 21595 21242 21442 21257 21614 21025 21586 21071 21536 21191 21369 21219 21693 20880 21689 21184 21528 21204 21518 21056 21601 21136 21444 21203 21523 21078 21565 20992 21544 21289 21267 21264 21657 20873 21605 21147 21228 21173 21477 21010 21653 21140 21421 21008 21527 21031 21560 20875 21490 21169 21638 21033 21565 21104 21494 21212 21461 21109 21553 21144 21696 21113 21562 21249 21746 21185 21652 21031 21518 21201 21449 21093 21391 21031 21522 20919 21568 21222 21384 21090 21658 20969 21514 21191 21409 21053 21517 21136 21648 21120 21513 21232 21416 21196 21652 20992 21400 21165 21416 21124 21493 21042 21527 21126 21496 21223 21458 21242 21472 21188 21593 21079 21564 21085 21482 21021 21454 21193 21471 21152 21465 21084 21389 21028 21483 20992 21505 21056 21585 21155 21495 21271 16316 17526 18117 17894 18647 18338 18770 18689 18800 30087 22390 21383 21485 21319 21368 21173 21632 21253 21349 21408 21440 21203 21171 21617 21363 21169 21467 21377 21376 21091 21601 21248 21251 21127 21753 21285 21234 21176 21745 21216 21139 21431 21499 21114 21219 21523 21337 21253 21547 21255 21294 21120 21666 21285 21248 21556 21543 21385 21307 21521 21328 21454 21402 21431 21215 21585 21182 21447 21360 21434 21289 21477 21335 21504 21418 20944 21287 21472 21087 21504 21516 21475 21459 21532 21120 21573 21288 21440 21412 21420 21265 21660 21347 21600 21335 21352 21389 21591 21351 21691 21214 21573 21263 21428 21337 21840 21430 21718 21136 21657 21154 21683 21297 21553 21303 21556 21399 21587 21209 21656 21024 21639 21164 21683 21248 21620 21361 21292 21271 21539 21337 21527 21257 21637 21151 21735 21013 21728 21164 21760 21129 21680 21196 21554 21312 21367 21243 21455 21303 21654 21291 21504 21350 21658 21264 21753 21041 21677 20960 21715 21074 21659 21036 21698 21085 21726 21147 21760 21216 21625 21136 21408 21106 21412 21088 21408 21193 21654 21284 21640 21306 21515 21312 21605 21319 21604 21280 21564 21259 21463 21224 16248 19317 19937 19856 20140 19896 20231 19944 20371 19953 22627 21384 21620 21191 21519 21161 21530 21261 21561 21224 21475 21191 21569 21303 21557 21277 21521 21273 21532 21274 21477 21313 21527 21273 21448 21309 21416 21291 21394 21287 21435 21383 21384 21451 21396 21393 21415 21511 21408 21500 21378 21564 21351 21571 20759 21474 21561 21411 21443 21351 21296 21270 21557 21226 21660 21146 21820 21185 21730 20530 21579 21068 21403 21126 21399 21417 21322 21623 21271 21628 21140 21623 21339 21309 21376 21261 21458 21504 21390 21574 21436 21467 21467 21368 21453 21570 21290 21682 21303 21632 21148 21613 21350 21628 21472 21485 21459 21287 21465 21253 21457 21504 21390 21625 21352 21688 20985 21693 21157 21655 21275 21600 21512 21448 21425 21224 21360 21415 21479 21678 21203 21669 21092 21661 21115 21724 21354 21620 21449 21480 21328 21497 21318 21505 21335 21676 21198 21831 20984 21803 21213 21624 21285 21655 21266 21627 21297 21760 21166 21689 20988 21721 21281 21596 21399 21357 21364 21564 21241 21723 21047 21756 21179 21623 21324 21928 21137 21441 21238 21777 21160 21597 21026 21545 21389 21568 21179 21523 21114 21632 21159 21674 20343 20943 20688 21091 20774 21559 20647 21045 20706 24104 21256 21625 21079 21609 21260 21518 21264 21395 21315 21660 21136 21550 21165 21552 21392 21461 21252 21450 21253 21718 21175 21598 21120 21591 21381 21479 21297 21671 21193 21727 21103 21517 21335 21377 21469 21216 21367 21680 21252 21564 21248 21488 21625 21330 21336 21450 21236 21741 21297 21361 21444 21299 21518 21297 21314 21785 21244 21504 21330 21386 21604 21302 21335 21561 21192 21473 21271 21341 21541 21184 21565 21416 21497 21488 21411 21458 21550 21365 21507 21096 21543 21517 21426 21451 21442 21349 21613 21435 21616 21399 21482 21397 21337 21426 21584 21185 21684 21191 21688 21524 21527 21465 21372 21368 21605 21155 21615 21021 21770 21233 21640 21413 21585 21385 21432 21386 21396 21461 21664 21368 21780 21212 21744 21260 21760 21147 21781 20967 21773 21138 21829 21237 21793 21189 21756 21208 21787 21024 21675 21131 21752 21142 21689 21281 21633 21116 21431 21252 21464 21264 21583 21174 21725 21206 21657 21216 21255 21369 21526 21181 21648 21205 21604 21139 21480 21195 21664 21090 21500 21234 21604 21129 21490 21377 21641 21221 21521 21303 21687 21344 21541 21145 21600 21256 21596 21255 21620 21260 21561 21224 21531 21351 21600 21250 21504 21431 21577 21290 21478 21412 21589 21224 21539 21545 21504 21287 21673 21332 21504 21107 21669 21273 21223 21528 21472 21250 21752 21307 21387 21702 21416 21224 21651 21199 21671 21290 21342 21716 21338 21382 21476 21184 21751 21235 21607 21250 21262 21394 21501 21382 21306 21556 21428 21542 21505 21442 21481 21385 21559 21326 21439 21222 21431 21349 21552 21504 21541 21436 21475 21447 21484 21707 21410 21441 21447 21345 21372 21394 21430 21431 21460 21618 21313 21739 21227 21701 21088 21668 21124 21703 21359 21581 21360 21652 21361 21447 21414 21799 21225 21722 21041 21755 21312 21633 21384 21455 21411 21711 21248 21729 21036 21751 21366 21613 21373 21459 21318 21728 21075 21785 21255 21681 21229 21545 21272 21704 21079 21677 21383 21268 21161 21696 21192 21680 21408 21442 21168 21672 21131 21705 21312 21515 21076 21748 21101 21575 21242 21539 21195 21773 21210 21590 21366 21475 21179 21629 21161 21538 21410 21665 21296 21706 21079 21525 21371 21456 21307 21752 21121 21583 21449 21498 21217 21651 21145 21436 21326 21705 21228 21479 21416 21474 21293 21581 21364 21530 21632 21290 21377 21657 21224 21441 21488 21412 21237 21555 21307 21294 21447 21593 21149 21477 21617 21213 21301 21838 21141 21416 21684 21242 11010 13409 14097 14477 14792 15511 15449 15928 15913 28224 23227 22116 21687 21360 21685 21324 21480 21558 21645 21275 21585 21465 21258 21373 21612 21339 6311 16156 17209 17202 17975 17958 18125 18009 18445 18173 25365 22349 21978 21329 21803 21488 21593 21237 21689 21427 21580 21395 21703 21127 21683 21426 21723 14720 18868 18963 19264 19229 19856 19432 19775 19576 19977 22796 22151 21447 21685 21209 21779 21402 21448 21341 21779 21296 21572 21371 21726 21254 21796 21361 18990 19912 20661 20249 20445 20076 20612 20455 20712 33143 22329 21261 21620 21216 21783 21248 21641 21344 21728 21255 21686 21385 21664 21239 21693 21379 21606 20351 21248 20956 21440 20903 21421 20894 21265 20881 24282 21323 21555 21196 21735 21232 21611 21350 21632 21271 21620 21441 21453 21265 21532 21352 21709 21321 21687 21347 21605 21243 21740 21226 21452 21400 21753 21130 21416 21400 21799 21133 21528 21419 21742 21176 21570 21613 21453 21329 21597 21608 21249 21287 21667 21616 21372 21266 21672 21521 21592 21425 21664 21347 21459 21316 21808 21424 21419 21357 21812 21274 21360 21363 21834 21292 21433 21339 21669 21280 21419 21654 21556 21376 21376 21688 21429 21358 21461 21664 21479 21505 21570 21577 21431 21187 21495 21623 21387 21498 21548 21674 21192 21552 21504 21739 21255 21596 21368 21537 21337 21796 21540 21405 21386 21700 21478 21635 21494 21756 21365 21609 21450 21731 21175 21617 21401 21733 21081 21587 21376 21728 21233 21788 21416 21667 21201 21774 21448 21624 21328 21808 21073 21781 21346 21533 21462 21749 21035 21799 21307 21645 21441 21460 21446 21755 21313 21739 21285 21688 21395 21467 21359 21668 21238 21761 21102 21805 21358 21635 21261 21624 21181 21707 21216 21637 21464 21853 21325 21799 21291 21766 21130 21609 21307 21649 21195 21621 21280 21807 21121 21723 21346 21339 21223 21757 21176 21757 21078 21641 21372 21666 21380 21520 21318 21768 21293 21514 21256 21619 21396 21533 21446 21561 21283 21677 21280 21803 21209 21731 21257 21563 21217 21632 21408 21544 21375 21444 21357 21711 21315 21654 21155 21600 21484 21798 21460 21627 21211 21643 21294 21451 21614 21316 21284 21732 21195 21500 21591 21427 21290 21709 21264 21469 21457 21536 21371 21591 21335 21408 21394 21762 21203 21527 21622 21415 21271 21826 21265 21384 21455 21718 21331 21575 21669 21488 21233 21504 21654 21409 21256 21801 21444 21328 21456 21686 21371 21440 21620 21585 21432 21711 21448 21207 21607 21450 21554 20992 21767 21477 21569 21241 21755 21506 21364 21421 21642 21532 21309 21427 21628 21483 21338 21504 21652 21405 21384 21507 21659 21450 21490 21433 21684 21429 21344 21493 21751 21371 21587 21453 21717 21302 21597 21533 21609 21284 21565 21488 21853 21244 21511 21471 21793 21200 21650 21446 21701 21085 21712 21458 21687 21072 21646 21355 21781 21339 21747 21462 21719 21125 21643 21367 21761 21099 21767 21439 21861 21092 21725 21339 21738 21184 21704 21388 21772 21085 21752 21386 21827 21121 21679 21392 21783 21141 21575 21457 21769 21314 21237 21432 21719 21473 21719 21453 21766 21460 21387 21254 21817 7836 13520 14199 15433 15129 16000 15611 16352 16042 16748 24131 22529 21612 21952 21210 5584 16731 17880 18020 18384 18056 18679 18542 18858 18336 25483 22032 22061 21413 21797 21140 18325 19302 19945 19484 19958 19613 20210 19700 20032 27298 22304 21556 21872 21113 21632 18504 20437 20407 20660 20298 20616 20465 20880 20503 20760 21934 21751 21537 21740 21473 18736 20820 21228 21071 21160 20874 21236 20932 21404 20897 22099 21493 21640 21537 21696 21433 21571 21387 21620 21529 21540 21516 21559 21273 21808 21398 21516 21252 21737 21358 21772 21197 21476 21291 21572 21615 21573 21419 21554 21485 21776 21576 21399 21305 21545 21448 21814 21360 21559 21316 21632 21543 21665 21264 21442 21313 21602 21767 21508 21355 21393 21303 21725 21691 21523 21770 21485 21408 21861 21405 21325 21293 21525 21483 21864 21444 21574 21275 21511 21648 21803 21278 21643 21289 21477 21467 21782 21485 21332 21528 21687 21577 21661 21582 21384 21574 21463 21689 21575 21549 21262 21607 21504 21754 21601 21582 21282 21504 21561 21687 21545 21591 21322 21528 21549 21686 21560 21569 21286 21615 21559 21682 21504 21645 
41557 34568 32458 36354 39651 34636 32843 34519 33308 35840 33293 42302 33856 35826 40113 35163 42407 35867 40544 36848 42527 43328 42557 36320 42093 35642 42835 36736 40258 34616 41532 35894 41335 36359 33180 34209 40088 36689 42437 39912 42599 36739 38544 36998 42160 35217 40047 36513 40967 34199 42791 36592 40393 35426 42902 37013 40021 36570 41883 33671 40461 37048 41649 35941 41830 37284 39045 36165 42416 35925 39682 37328 42080 35992 41350 36465 40281 34292 40941 36537 41728 35489 41577 34201 40375 36134 40736 32947 41951 36564 40006 35085 41561 35165 39867 35714 41728 36984 41028 36194 40214 34032 39287 36888 41754 35521 42871 33930 40105 35056 41095 36480 37011 42626 36682 34373 36160 36624 34407 36001 34816 36113 36547 34706 36621 32976 37314 37500 37376 34403 36100 36533 33932 36224 34114 35933 36416 35080 37297 34965 38864 33664 38069 32240 37136 42504 38586 37475 39025 33815 37987 34573 37732 36400 36864 36247 37463 36388 36195 37088 35481 36134 36370 35566 35759 36274 35595 35840 42580 35584 37136 36373 37988 36312 37638 36576 37353 35360 38425 36224 38672 36448 38711 36912 18081 19111 23268 26368 28715 28984 31241 25908 25392 33112 39442 38848 35608 39424 41016 37936 38728 37680 38264 36992 38229 38085 39963 37488 40419 36522 40477 37033 40663 35696 40599 36305 41506 35328 42232 35150 40865 34712 39793 34858 40016 33713 40270 35888 39687 37784 41260 37538 39828 38205 39552 37158 36041 36267 38416 36280 38841 35430 41240 36745 41517 35395 42652 35792 41168 37517 40576 34656 40826 36943 41056 38308 40939 37813 41303 36000 39281 36082 39593 37363 41016 37510 42317 37206 41208 36608 40368 35672 41047 38348 40216 38176 40299 36868 39985 37576 41373 37112 41615 36976 40355 36980 40354 38544 39721 37767 41344 37024 41782 37827 41464 43123 40137 36096 40704 37952 40428 38402 37825 37772 41880 36438 42475 37184 40054 39062 39136 40148 38841 38423 40327 37334 33522 35749 40987 37888 40179 40512 40626 38248 40453 37200 43088 37733 40544 41731 38231 40071 39264 38441 34416 36864 40800 37659 38936 43024 39067 39204 41094 37120 42707 37395 39911 41242 39931 42133 39004 38807 42908 41812 40118 40338 38596 41741 38640 37699 33129 39577 41938 38668 40332 42139 37426 42276 40372 40960 39890 39439 39762 41040 40004 25122 36081 33415 31749 36352 32026 37042 36374 30872 31594 44000 43445 36096 42186 32854 37943 41900 40888 41844 42056 33177 39751 33223 38208 42199 40858 40268 40704 33269 38166 42426 38481 41337 40825 39155 39844 42778 37721 33680 40352 41108 39936 41357 39952 33408 36440 34103 40180 40452 40960 43120 39011 34450 38524 33336 40368 40608 40577 34522 36681 34072 40298 42409 40612 34529 37763 33804 38550 33117 39728 41832 40395 35405 36145 35046 39445 33142 39707 33196 37953 34032 38837 42363 40217 33201 38418 33817 37196 33259 40572 40642 40418 34836 36204 34101 39270 40439 39808 42923 37928 34657 39017 42360 37807 33227 37963 33520 36272 42760 39760 34507 37970 33785 38582 43041 40369 42763 39266 33491 39035 35032 38968 33681 40000 35800 39592 34593 38025 33112 39660 42573 39053 42064 38373 32995 36816 33419 40020 41763 38855 34752 37421 32923 39712 42023 38669 33153 38812 34424 38661 32984 39941 42133 40131 34641 37273 41797 39865 42135 39171 43080 38359 33270 38871 43001 40585 42624 40713 42705 39953 34118 38580 33701 38649 42896 38304 42656 40110 43065 39450 42772 38950 41961 38130 42999 37636 32737 37936 33808 39251 43184 40918 40020 31575 37600 35529 33182 39748 34456 33248 34493 42790 42883 42074 43239 41488 41808 39864 34263 40176 41608 42016 42380 40224 39751 34343 41472 39699 42887 41808 41632 38993 34075 39907 40396 39325 36003 40657 40413 39750 35811 39880 39368 42487 43440 39344 40256 33220 41120 40493 33638 40257 41057 38970 34757 40588 40220 33584 33233 41549 41281 33157 40798 42788 42197 42632 40564 33952 39697 42632 41664 42540 41017 42999 41669 32834 41877 37315 40824 42711 39236 32708 32712 42496 42833 33492 38624 33792 40484 42293 42197 42416 40604 34887 41271 34076 41220 41592 42097 34291 41418 35408 40119 33861 40461 42304 41576 36656 42224 35655 38917 34759 39179 35095 40652 33561 40841 33605 41784 34105 39911 34692 37650 34535 39418 35107 39944 34373 41365 41004 40808 33431 41130 33402 40183 34544 39440 35846 37771 35404 39453 35652 39032 34866 39787 33496 40624 41930 40800 42880 41304 34785 40760 32779 41232 34858 40135 36043 38021 35073 37088 35392 38354 34843 38016 35104 38719 35712 39351 35625 39868 34537 38874 41868 39067 42048 38767 41895 40083 34723 40481 34496 40833 33216 40611 34310 41032 34211 40299 33791 40310 42880 40409 39268 40473 37148 35904 39139 36590 40056 37207 41496 37379 34752 41472 34449 39789 33322 39324 33252 40320 33744 39972 42888 40169 33710 40836 33712 40545 33110 40362 33352 40369 42945 41201 33417 40381 42491 41378 42219 41121 41912 41046 42624 42058 41848 42809 42036 41962 42422 33257 41579 43300 41811 33885 41399 33882 35128 42515 33824 41851 42596 41844 40866 40695 33700 40096 34841 39204 36608 39638 35594 32457 33635 38340 42083 39271 42096 42362 41364 34688 40493 34629 39069 34570 41328 41316 41584 40736 42624 32890 41641 33922 42167 43025 43068 41891 42852 33840 40593 35050 40912 34320 39225 34450 41301 34664 42373 43270 42872 41098 42858 40580 42627 32876 41643 34629 41272 35178 37641 35272 39355 34836 40554 34041 32633 42081 42344 40400 41560 42394 43184 35318 39895 34951 38607 34899 39056 35612 41420 34460 42304 42988 41295 43264 41364 32922 41176 35104 39917 36838 37584 36404 40175 34455 40576 34887 40243 34680 40640 35705 39580 35223 37649 35512 40476 34183 41824 41925 41773 33856 40300 35739 38308 35996 39754 34624 41036 37703 39138 42342 40648 36028 39339 34257 37731 33395 41674 33665 39664 33173 38871 34200 39433 34979 41292 37542 34199 38625 35288 33453 33773 38062 34536 40426 40400 34576 38604 34264 40261 33239 40067 41964 41271 34906 38898 33601 39488 33369 41397 42813 40474 42624 40576 35584 39698 34261 38662 34115 41500 43132 41051 35116 39776 35863 39061 33170 41175 41701 43057 40209 41936 34998 40091 33776 39872 42848 34704 40984 41399 42656 40556 35994 40687 41694 42521 41131 33292 40567 41079 36241 40452 32768 40885 41889 34271 40768 41564 33804 39594 42742 40882 41665 33542 39414 33851 41813 43296 43044 42343 42704 33810 41480 33047 38550 33492 32876 41863 42802 42536 41732 34582 42244 34337 41826 43085 42160 41575 42332 33922 39500 35042 39814 35115 32872 32976 42407 41992 41840 34377 39280 34576 37915 35889 40186 34485 41908 34008 41550 42423 41971 41995 42860 34831 41484 36096 40050 35721 40320 35688 39351 36113 37504 36032 39040 36685 40373 36224 39755 36065 39895 36320 37733 35019 39128 35891 39184 35195 40455 34384 38967 42487 40448 42710 40513 34209 39473 35760 39944 34797 39832 40603 41888 33330 39680 34472 39886 34145 39087 42817 40227 34709 38537 43145 40528 34203 38983 42919 41800 34680 40088 33068 40818 35318 41104 33503 39146 33964 40099 34167 40279 34374 40274 33747 39984 33389 41382 34074 40012 32712 42128 34000 40609 42944 42245 34183 40008 33394 33176 32368 40575 35024 41053 32784 38762 34896 40460 40466 33210 42289 40388 35936 41023 42008 35456 41901 40356 34729 40016 35059 40667 41664 35532 41241 41856 42921 39840 36089 40320 34403 40025 40637 41895 43430 41984 41194 33626 41942 33542 32515 41976 43081 42022 33888 41130 42774 40489 42547 41735 33496 32398 33050 42115 43008 42816 43178 35633 41816 42475 42795 41605 41968 41955 42503 42650 42776 34480 40789 35961 40309 35365 38473 34768 38817 35407 41675 34146 41245 34672 41382 42715 42336 36571 40231 35622 38012 36063 40744 34421 41473 42936 42316 35776 39976 35619 38052 36000 41585 34561 41733 42794 41344 35574 38505 36138 40368 35041 40310 33514 40281 35301 38668 35091 41664 40664 39671 35072 39657 34896 41664 42472 39640 34880 39113 35355 40709 33216 38311 35780 38948 33909 40292 33415 39793 36120 40007 34064 41490 42961 40097 34720 39395 33255 41703 34854 40536 35416 38641 33164 41612 42576 41346 35984 38859 34123 42288 43296 40352 34729 39200 42447 41533 35466 40213 43049 42296 42902 41200 34118 41386 33356 33955 40585 41692 34889 40032 42400 43008 42240 40653 33674 40890 41082 42728 34252 39335 42901 34487 40120 41063 36970 39272 42096 35178 40293 34028 28853 35925 30184 33233 31158 30328 35431 35588 43311 41709 39861 35281 41293 35239 41048 42933 33817 34454 40541 33939 42469 40607 42040 34480 41286 24960 37604 38048 37885 36434 36038 38005 36743 30761 38344 43220 42534 38536 41186 36568 42680 34256 40264 35248 42106 34040 41656 35538 39082 35097 41986 35820 32563 35266 36400 39457 39535 36017 41351 35632 32928 37147 36512 40101 42665 35290 39978 36101 41856 42580 41749 36192 40592 33767 41655 35841 40224 36247 41472 37109 36685 34044 40080 42615 38788 33383 42344 34818 34764 41797 40728 34431 39812 36240 40008 34595 41067 35537 40347 35187 41616 34764 40403 35403 41528 34338 41495 40248 37484 42139 37000 42256 36901 40348 36464 42604 41492 33714 39744 35859 40089 34456 41325 34327 40492 34405 42096 42850 40646 33370 41208 35589 41046 35330 41322 34339 40438 35874 40192 42640 42096 36131 39058 42095 42059 36549 39238 33147 42010 36051 39601 33666 34192 42416 41376 34352 33952 39991 40961 34972 33991 41583 40568 34932 32818 33648 41901 34777 41299 42762 41232 36352 41936 42457 41932 36532 40531 41553 41841 36855 40778 42496 41699 35045 40337 42383 34864 33304 41192 41587 35208 42144 41920 42848 34840 42761 32993 33350 33570 42149 40038 43251 34775 41693 43264 33713 34717 39622 33396 32388 35573 40342 34183 41433 33373 41129 36280 33152 41846 41952 35337 42672 34624 42836 36202 41600 34416 42297 35831 39689 34338 41765 35845 38600 33968 41227 35559 40168 36259 41955 35008 39763 36120 42277 34547 40882 36334 38422 36080 41248 33512 42391 36088 38184 36372 41028 34792 42135 42743 42688 36279 40863 35971 40653 35152 41728 43000 42066 34944 40296 35805 38944 36505 41627 34572 40399 34454 39732 35504 39864 34528 42389 37206 41284 36519 40851 35960 39046 34295 40928 34641 39868 34477 40320 36673 38898 35672 41224 41673 40532 36208 39559 36167 38560 34519 41608 34871 41440 33021 40865 35908 40857 33105 40056 34456 41604 33528 42194 33866 40505 35178 40367 36516 40044 35716 40288 33863 39895 34268 41636 33470 41796 42505 41931 35749 40969 34787 39310 33984 42689 36407 42446 34792 40073 34701 40793 42752 34628 40818 40775 35687 39910 43213 34351 42048 40998 35603 40168 42958 42765 33312 41625 34260 41228 41988 41959 35868 39951 33353 34179 41992 40865 36611 40333 41764 42957 35688 41162 34007 34681 42550 40513 32771 34407 41752 40472 36423 42240 41250 42560 35290 41728 42358 34516 33643 41996 35753 42264 40352 34421 42293 33634 37256 35928 42706 33832 40298 36160 32654 41297 42477 34711 33064 40903 42403 34720 42807 41609 32834 34296 41904 41880 33073 34593 42294 43103 42624 35189 42148 41488 43216 36244 41765 34113 42433 35675 40826 34325 33156 34002 40424 33911 42520 37248 40498 33157 42688 36322 39705 34584 42254 35456 38740 35248 42324 35395 38277 34664 41484 36211 41368 36007 42531 35786 39014 34656 41640 35863 38920 36002 42504 37255 38720 35721 41360 35875 39496 35268 41662 36100 38764 35874 41645 36765 38876 35232 41493 36325 39208 33920 42263 36096 40857 40624 42369 35792 42560 35761 42534 36050 42432 42112 40550 36655 31197 29856 37303 30416 36841 36332 32576 39796 37145 33313 40600 33511 34061 37638 40072 27429 32643 35063 36634 40327 37185 33669 31890 35180 39744 44618 38873 39286 42162 36409 38986 40150 40320 37320 31905 37100 33522 39740 34544 37686 43608 41714 33654 36800 39042 34224 31208 41927 42279 34180 40629 33527 42289 36433 32184 34757 37731 35981 33098 35524 42528 34112 35579 40208 38851 39463 36424 40256 37066 41940 36736 39573 43114 34624 33033 34746 42151 33920 41664 34451 33012 32960 32736 33408 40384 36304 41816 33203 40008 35812 41600 36097 39960 42820 41152 33792 34320 33545 42016 33616 42805 36007 33594 41769 41191 33576 42144 36640 41362 33835 40800 34308 33285 34476 40105 42384 41179 34184 35785 32656 41397 41924 41258 35840 35147 32935 35586 42888 42088 37223 42066 41527 41136 33312 42740 37186 42280 33952 40527 33154 34176 36237 40660 34700 40649 42961 43085 36273 42933 41460 33280 34968 33653 34656 33783 41411 33915 42523 35350 33735 33344 40304 34409 32440 35681 33905 33752 40384 32768 33364 34971 33244 33840 40934 33237 33319 34855 33348 33354 40516 34633 33520 34711 32446 34372 
23867 23827 24265 23837 23944 23821 24322 23705 23975 23942 24157 23683 24289 23990 23839 23661 24281 23701 24064 23869 24245 23497 24121 23829 24092 23616 24258 23829 23936 23760 24293 23670 24150 23898 24223 23520 24186 23764 24096 23633 24245 23689 23938 23786 24273 23495 24166 23725 24184 23686 24231 23751 23909 23788 24229 23691 24320 23840 24231 23546 24096 23785 24047 23692 24215 23792 23988 23799 24214 23494 24065 23564 24173 23889 24101 23708 24081 23625 24129 23605 23921 23600 24167 23500 23962 23666 23975 23543 23985 23744 24061 23533 24262 23408 24059 23663 24130 23572 24161 23741 23873 23559 24137 23560 24056 23507 24218 23488 23948 23603 24080 23554 24069 23746 24007 23588 24150 23576 24071 23841 23948 23604 24064 23579 23844 23659 23981 23632 23905 23686 23901 23569 24007 23626 23927 23741 23986 23633 24135 23207 23946 23815 24025 23635 24147 24035 23912 23573 23863 24192 23876 24251 23604 24236 23634 24170 23600 24245 23640 24247 23061 24240 23752 24307 23737 24282 23793 24211 23825 24192 23798 24128 23884 24196 23796 24234 23864 24218 23839 24211 23863 24161 23834 52 14364 17543 17791 18759 18512 19361 18898 19696 19119 32997 27477 26912 25632 25867 24957 25436 24695 25143 24060 24994 24409 24881 24216 24700 24142 24770 24028 24684 24072 24667 23973 24705 24056 24520 24080 24520 24113 24373 23933 24393 24005 24448 23863 24413 23838 24191 23860 24265 23920 24328 23863 24515 23852 24320 23911 24455 24135 24170 23660 24298 23676 24229 23864 24307 23847 24165 23975 24214 23726 24137 23703 24166 23752 24241 23729 24285 23712 24295 23726 24143 23725 24180 23872 24023 23993 24072 23884 24112 23838 24001 23771 24236 23725 24264 23889 24080 23658 24128 23838 24069 23873 24183 23767 23969 23879 24158 23738 24087 23659 24102 23855 24070 23854 24119 23769 24108 23769 24200 23764 23997 23728 23971 24055 23943 23906 23812 23900 24139 23744 24124 23632 23967 23965 23892 23950 23815 23905 24066 23724 24089 23685 23959 24111 23860 23867 23978 23703 24246 23536 23923 23941 23791 24039 23959 23912 24141 23724 24101 23597 23857 24087 23857 23886 23861 23800 24152 23761 23873 23906 23837 24051 23681 23789 24225 23654 23878 23884 23960 23852 23767 24073 23835 24039 23869 23865 23790 24089 23558 24221 23744 24004 15815 18469 19320 20024 19745 20455 20365 20548 20633 20711 27611 26243 25216 25383 24996 24953 24697 24768 24292 24661 24172 24477 24407 24384 24267 24538 24039 24522 24046 24373 24211 24057 24157 24430 23818 24485 23980 24240 24122 24231 23994 24405 23767 24455 23978 24218 24028 24257 23855 24295 23722 24318 23910 24021 23946 24297 23808 24280 23808 24336 23832 24204 23696 24273 23718 24217 23846 24022 23868 24344 23735 24327 23796 24119 23799 24149 23681 24289 23548 24188 23777 24006 23783 24267 23539 24200 23872 23926 23831 24221 24108 24199 23748 24088 23781 24140 23655 24252 23557 24160 23705 24047 23598 24272 23629 24196 23776 24043 23653 24211 23624 24111 23682 23990 23622 23941 23591 24109 23433 23956 23822 24285 23646 24147 23606 24067 23644 24046 23657 24001 23583 24244 23594 24138 23701 24163 23593 24246 23095 24009 23688 24011 23600 24033 23603 24076 23571 23959 23745 23872 23709 24135 23617 23992 23837 24023 23708 23994 23613 24086 23585 24018 23833 23872 23755 23970 23645 24100 22946 23968 23559 23968 23792 23861 23746 24043 23708 23968 23649 23816 23684 23857 23736 24165 23834 23963 23800 23909 23713 24000 23511 9431 19241 20480 20868 21153 21301 21567 21104 21797 21495 28448 25664 25144 24743 24754 24421 24340 24198 24363 24097 23941 24297 24158 23840 24119 24212 23982 24130 24235 24064 23921 23785 24361 23896 23851 23673 24325 23875 23827 23927 24173 23821 23852 24209 23940 23735 23910 24112 23858 23769 24237 23825 23796 23936 23969 23721 23781 24119 23954 23844 23964 24154 23584 24136 23939 23965 23831 24168 23804 24199 23920 24034 23891 24132 23714 24080 23875 23871 23905 24059 23605 24008 23840 23852 23824 23960 23829 24081 23851 24132 23884 23878 23756 24059 23536 24105 23588 24064 23791 23917 23900 24028 23682 24122 23801 24091 23728 23925 23799 24189 23829 24166 23584 24156 23675 24145 23646 24065 23787 23943 23792 24003 23708 24167 23553 24217 23408 24179 23514 24208 23604 24098 23748 23921 23681 23822 23680 24056 23731 24133 23607 24219 23547 24158 23465 24135 23664 24167 23550 24128 23610 24073 23736 23946 23794 23874 23723 23913 23754 24064 23724 24131 23671 23988 23572 24047 23509 23993 23375 24006 23515 24071 23697 24141 23577 24122 23563 24069 23517 24023 23526 24068 23520 24016 23466 23993 23502 23982 23529 24041 23584 23983 19741 21580 21480 22167 21874 22292 22016 22357 22126 34885 25049 24532 24128 24413 23936 24182 23818 23997 23812 24112 23832 24037 23722 23957 23658 23928 23651 23905 23708 23896 23723 23896 23721 23885 23708 23900 23713 23967 23697 23884 23779 23899 23739 23913 23820 23869 23783 24008 23766 24038 23754 24049 23753 24055 23700 24079 23658 24083 23680 24128 23842 23956 23662 23738 23596 23817 23954 23721 23993 23680 24121 23780 24009 23834 23763 23623 23713 23836 23693 24070 23562 24150 23628 24081 23904 23879 23522 23978 23749 23887 23928 23626 24040 23485 24072 23545 24113 23621 24005 23766 23867 23791 23677 23816 23848 23816 23995 23717 24010 23568 24003 23513 24087 23624 24117 23801 23912 23673 24017 23785 23750 23833 23968 23745 24152 23608 24049 23565 24023 23543 24165 23652 23943 23687 23802 23678 23827 23733 24111 23719 24129 23543 24114 23492 24157 23556 24011 23730 24405 23670 23864 23656 24064 23494 24121 23318 24117 23545 24101 23718 23836 23671 23839 23668 24115 23590 24103 23438 24150 23584 23980 23530 23866 23528 24140 23492 24099 23464 23905 23645 23933 23739 23809 23504 23909 23515 24090 23397 24007 23373 23944 19350 22631 22454 22897 22624 23287 22595 23184 22584 23128 24710 24275 23959 23969 23712 23929 23615 24170 23744 23975 23654 23933 23773 24212 23672 23958 23694 24017 23461 23923 23649 23898 23680 23770 23639 23957 23597 23931 23496 23900 23852 23246 23788 23680 23688 23996 23582 23847 23632 23726 23831 23591 23754 23952 23607 23953 23460 23804 23909 23750 23828 23644 23626 24093 23447 23772 23831 23633 23947 23555 23721 24073 23606 23882 23683 23701 24023 23720 23704 23703 24002 23680 23755 23752 24059 23540 24040 23480 24007 23812 23919 23822 23810 23776 23955 23516 24049 23767 23809 23755 23776 23742 23968 23537 24142 23671 23964 23680 23746 23749 23896 23651 24080 23500 24121 23655 24044 23717 24052 23691 23798 23628 23967 23534 24053 23079 24033 23561 24048 23370 24119 23515 24118 23605 23969 23607 23940 23655 24129 23607 23925 23639 23760 23691 23784 23592 23751 23639 23929 23656 23985 23584 24143 23425 24176 23419 24118 23446 24165 23544 23839 23649 23893 23642 23881 23597 23968 23593 23887 23516 23912 23531 23994 23420 24144 23467 23974 23578 23936 23493 23784 23631 23901 23452 23725 23711 23943 23599 23747 23563 23978 23606 23847 23402 23976 23575 23911 23552 23961 23628 23886 23521 23804 23744 23947 23496 23764 23671 23832 23521 23767 23749 23887 23325 23872 23785 23735 23506 23959 23697 23727 23793 23789 23638 23800 23693 23640 23690 23809 23464 23973 23610 23479 23912 23777 23493 24070 23562 23930 23749 23676 24037 23716 23780 23735 23492 23941 23643 24012 23910 23606 24000 23476 23958 23433 24002 23563 23940 23530 24016 23665 24002 23714 23925 23686 23824 23671 23920 23724 23893 23644 23937 23606 24025 23549 24123 23609 24001 23719 23991 23482 24081 23441 23976 23499 23983 23683 23940 23838 23803 23645 23767 23719 23959 23518 24095 23421 24091 23509 24001 23655 24059 23631 23949 23516 24064 23064 24105 23483 24067 23642 24105 23650 23901 23567 24036 23376 24206 23660 23915 23525 23860 23539 24120 23314 23968 23590 23889 23504 23956 23412 23989 23565 23772 23556 23872 23424 24046 23467 23881 23464 23847 23481 23975 23443 23943 23576 23909 23445 23939 23452 23847 23608 23927 23581 23961 23608 23817 23544 23901 23498 23840 23671 23861 23584 23927 23483 23925 23686 23751 23521 23986 23447 23927 23611 23776 23605 23938 23504 23782 23683 23828 23511 23853 23694 23798 23633 23950 23472 23862 23907 23523 23631 24008 23449 23721 23955 23566 23709 23993 23501 23664 23774 23838 23497 23767 23955 23888 23681 24065 4909 14604 16435 16854 17180 17895 18109 18076 18592 18539 30864 27635 26748 25528 25704 25196 25151 24805 24979 24652 24733 24622 24665 24269 24633 24420 24292 15415 18836 19387 20165 20132 20557 20117 20788 20550 20886 28125 26711 25620 25621 25070 25164 24442 24874 24519 24816 24567 24893 24381 24470 24230 24588 24064 18998 20549 21431 21030 21817 21505 21828 21523 22104 33680 26681 25341 25400 24448 24954 24486 24812 24138 24685 24221 24389 24210 24636 24088 24873 24179 24535 20579 22107 21879 22596 21991 22641 22200 22792 21940 27999 25053 24717 24211 24576 24243 24567 24103 24552 23808 24310 23821 24456 23687 24196 23808 24358 19313 22812 22743 23186 22744 23253 23017 23187 22880 23265 25088 24535 24009 24311 23983 24551 23918 24337 23829 24096 23861 24269 23680 24091 23904 24247 24223 24091 23885 24084 23767 24093 23909 23995 23720 24094 23996 23970 23823 24153 24000 23983 23852 24146 23885 23933 23786 24163 23707 24000 23834 24142 23755 23883 24108 24128 23953 23939 24085 23941 23699 23977 24153 23815 23721 23927 24138 23800 23777 23917 24217 23819 23673 23869 24224 23752 23618 23925 24037 23556 24064 23887 24098 23695 24092 23839 24092 23510 24156 23920 23944 23689 24199 23912 23769 23824 24130 23836 23736 23808 24142 23855 23825 23788 24108 23750 24056 23865 24152 23586 24018 23799 23969 23576 24157 23809 24008 23505 24209 23818 23966 23687 24225 23799 23869 23738 24189 23752 23926 23765 24184 23749 24241 23773 24161 23603 24089 23704 24161 23764 24232 23700 23929 23772 24165 23709 24272 23644 24024 23723 23955 23799 24244 23637 24160 23705 24044 23792 23944 23773 24194 23502 24240 23517 24256 23696 24076 23584 24143 23542 24137 23479 24063 23735 24049 23552 24103 23473 23977 23513 24064 23799 23917 23634 24072 23473 24057 23441 23977 23604 23736 23530 24085 23528 23987 23459 24034 23678 24183 23608 23989 23558 24125 23575 23945 23715 23883 23748 24023 23646 23936 23608 24071 23592 23985 23539 23877 23692 23924 23790 23868 23708 24033 23559 24011 23574 24095 23413 24020 23468 23983 23737 23649 23653 23985 23573 24008 23424 23849 23897 23648 23717 24106 23608 23928 23988 23715 23719 24097 23643 23881 23940 23703 23660 24041 23534 23833 23921 23697 23608 23940 23804 23669 23732 24086 23556 23881 24087 23607 23672 24048 23797 23757 23728 24110 23571 23646 23885 24043 23806 23822 24005 23655 23636 23945 23832 23759 23725 24145 23600 23849 23856 23783 23677 23825 24042 23562 23864 23886 23977 23488 23940 23735 24030 23539 23925 23890 23943 23542 24017 23751 23872 23640 24022 23851 23872 23300 24029 23831 23888 23674 24121 23720 23834 23709 24024 23723 23777 23628 24120 23641 23783 23641 24064 23867 23749 23600 24060 23788 23766 23632 24043 23605 23881 23690 24116 23651 23958 23668 24076 23651 24102 23723 24033 23558 23866 23702 24138 23656 23987 23677 24087 23572 24091 23678 24105 23522 24279 23706 24172 23529 24087 23659 24142 23525 23993 23575 24167 23575 23948 23637 24133 23660 23826 23552 24072 23681 23837 23563 24125 23736 23929 23745 24103 23697 24014 23482 24103 23581 12033 15004 16825 17030 18093 17585 17959 18013 18629 39792 29023 26763 26428 25636 25634 15741 19348 19681 20631 20045 20649 20384 20957 20588 21041 28416 26813 25816 25735 25122 14430 20140 21592 21324 22080 21415 22023 21748 22179 21560 28437 25778 25700 25057 24960 24605 21529 21991 22695 22196 22657 22384 22673 22584 22731 28041 25565 24751 25040 24503 24551 22186 23190 23165 23404 23132 23302 23133 23435 23221 23318 24576 24616 24233 24616 24016 24385 24049 24369 24121 24368 23888 24301 23969 24324 24084 24312 23926 24128 24021 24296 24073 24054 23924 24127 24018 24365 23904 24265 23872 24192 24152 24201 23736 23984 23950 24253 24163 23996 23901 24089 23942 24179 23992 23973 23769 23959 24085 24296 23858 24140 23791 24009 24120 24296 23696 23858 23820 24075 24205 24019 23911 23885 23877 24135 24134 23904 23631 23873 23924 24238 24199 23876 23907 23848 23878 24130 24198 23903 23808 23912 24225 23957 24112 23766 23844 23786 24205 23874 24263 23710 24039 23808 24164 23955 24145 23797 23969 23895 24173 23913 24051 23756 23873 23907 24084 23916 24066 23792 24000 23785 24141 23954 24164 23713 
23001 22540 23088 22752 23125 22698 23123 22532 22951 22652 23225 22429 23040 22797 23015 22407 23124 22546 22980 22484 23267 22424 23054 22606 22986 22537 22963 22742 22921 22516 23287 22536 22855 22691 23272 22341 23069 22864 22819 22522 23078 22713 22951 22674 23328 22393 22721 22999 23051 22736 22797 22973 22677 22496 23160 22740 22784 22732 23313 22343 22766 22917 22872 22579 22871 22971 22793 22679 23337 22553 22656 22809 22979 22406 22853 23015 22738 22588 23208 22527 22729 22698 23063 22560 23186 22665 22432 23083 22812 22816 22587 23192 22698 22803 22777 23102 22580 22885 22987 22893 22478 23035 22956 22632 22784 23040 22806 22639 22816 23153 22608 22963 22765 22951 22715 23094 22863 22954 22886 23063 22328 23151 22787 22805 22612 23159 22470 22967 22797 22987 22553 23019 22733 22973 22737 23065 22464 23267 22628 22934 22764 23114 22496 23228 22518 23009 22672 22798 22557 23143 22356 23259 22263 23192 22610 23042 22652 23000 22646 22903 22658 23149 22448 23288 22477 23258 22194 23308 22477 23110 22621 23107 22632 22927 22530 23262 22276 23369 22528 23065 22640 23173 22393 23300 22496 23054 5554 7927 8944 10701 10868 12081 12121 43675 38912 35494 31991 30785 28504 28294 26628 26703 25326 25916 24757 25092 24427 24543 23660 24055 23589 23828 23127 23680 23069 23403 23168 23265 23145 23184 23304 22988 23339 22809 23273 22852 23110 22931 22985 22930 22842 22679 22716 22762 23191 22641 23245 22711 22949 22747 22995 22712 22793 22682 22701 22813 22850 22799 22849 22736 22905 22611 22948 22564 22955 22407 23024 22469 23002 22704 22891 22725 22020 22721 22656 22864 22729 22707 22928 22426 23054 22305 22932 22266 23090 22330 23093 22624 22841 22633 22702 22711 22832 22503 23021 22481 23031 22139 23031 22459 23002 22609 22855 22546 22829 22495 23169 22241 23079 22301 23059 22491 22890 22508 22711 22625 22893 22317 23027 22135 23116 22368 22951 22513 22647 22508 22924 22331 23127 22089 23200 22316 23029 22486 22674 22535 22970 22310 23100 22118 23161 22397 22892 22567 22834 22588 23126 22470 23164 22289 23014 22443 22795 22542 23010 22274 23165 22190 23040 22450 22964 22391 23111 22237 23072 22210 22898 22395 22885 22315 22885 22380 23158 22436 22849 22504 22925 22553 22852 22225 23099 22035 22841 22127 22931 310 6684 8945 11758 12179 13933 14041 15176 15091 43568 37965 34505 30722 29499 27680 27224 25873 25987 24874 25168 24278 24503 23984 24278 23621 24067 23248 23726 23123 23601 23210 23392 22937 23517 22831 23375 23000 23171 22810 23196 22731 23361 22657 23208 22844 23165 22707 23185 22519 23201 22448 23074 22691 22952 22708 23253 22713 23032 22811 22900 22632 22999 22439 23216 22490 22993 22985 22813 22595 23204 22619 22881 22820 22687 22768 22941 22515 23156 22357 22723 23025 22707 22416 23228 22314 22827 23015 22897 22579 23062 22406 22907 22741 22549 22707 22874 22452 23192 22528 22653 22888 22619 22599 23236 22455 22834 22919 22644 22717 22868 22346 23005 22503 22588 22926 22679 22907 22852 23040 22780 22915 22576 23040 22508 23000 22720 22745 22630 23021 22328 23096 22677 22602 22865 22809 22538 22917 22733 22752 22733 22673 22681 22999 22503 23008 22726 22562 22839 22903 22620 23077 22558 22811 22621 22848 22521 23083 22383 23106 22772 22840 22745 22983 22328 22900 22249 23099 22569 22951 22759 22824 22809 22928 22589 22998 22408 23049 22298 23056 22336 23111 22486 23200 22528 23182 22545 22912 22639 22629 22560 22608 2935 9312 11479 14371 14900 16400 16680 17594 17489 18576 36035 32454 29317 28117 26326 26315 25077 25032 24354 24864 23795 24185 23610 23959 23040 23872 23271 23617 22872 23738 23184 23086 22848 23557 22892 23223 22868 23538 22807 23153 22732 23589 22489 23313 22670 23232 22293 23403 22624 23159 22628 23088 22414 23078 22643 23096 22496 23168 22555 22979 22772 23078 22417 23172 22353 23063 22494 23223 22284 23241 22342 22981 22538 23100 22467 23207 22373 23280 22490 23049 22560 23280 22388 22804 22584 23026 22387 23026 22424 23060 22472 23164 22581 23016 22372 22984 22457 23079 22411 23128 22721 22855 22389 23024 22375 23137 22555 22757 22548 22936 22535 22976 22343 22871 22408 23073 22530 23001 22543 22980 22552 22918 22576 22886 22380 22905 22480 23077 22384 23165 22469 22778 22571 22673 22697 23271 22872 22736 22792 22750 22765 22811 22461 22992 22467 23322 22386 23258 22436 23085 22493 22847 22612 22511 22532 22656 22887 22581 22896 22692 22941 22696 22707 22747 22553 22756 22291 22844 22548 23111 22501 23140 22432 23119 22818 22646 23033 22659 23044 22594 23002 22423 23048 22317 23105 22336 22989 22336 23024 22304 22875 22461 12034 14466 16677 17256 18497 18663 19337 19099 19931 33064 30179 27240 26556 25249 25126 24239 24370 23765 24147 23101 23805 23431 23620 22987 23587 22737 23491 22739 23499 22621 23429 22627 23370 22617 23416 22520 23285 22483 23409 22475 23362 22416 23289 22338 23345 22351 23304 22377 23440 22505 23424 22427 23319 22496 23359 22528 23224 22561 23125 22700 23085 22691 23093 22637 22845 22740 22917 22683 23052 22656 23212 22535 23238 22879 23337 22340 23254 22331 23147 22477 23203 22528 22909 22545 23379 22520 22921 22371 22914 22551 23155 22377 23173 22312 23143 22189 23132 22272 23112 22492 22937 22424 22913 22247 22981 22406 23117 22418 23176 22400 23139 22241 22971 22547 23002 22644 22852 22662 22291 22458 22916 22528 23112 22416 23122 22319 23144 22331 22960 22355 23032 22580 22840 22618 22857 22528 22729 22567 22976 22528 23021 22507 23061 22396 23015 22413 22989 22737 22753 22688 22624 22714 22903 22529 23056 22641 22990 22400 22819 22967 22644 22692 22503 22542 23121 22420 23126 22471 22785 22777 22556 23059 22695 22608 22873 22467 23271 22592 22851 22612 22624 22929 22509 22807 22449 23052 22660 22839 22749 22612 22832 16283 18049 19336 19625 20537 20537 20864 20887 20996 21196 26817 25539 24747 23815 24112 23200 23735 23245 23431 23048 23075 23010 23324 22901 23364 22601 23278 22729 23137 22793 23053 22762 23282 22676 23268 22599 22989 22724 22878 22840 23170 22531 23235 22295 23257 22549 23048 22601 23072 22585 23264 22356 23303 22496 23130 22757 22872 22664 23065 22480 23140 22240 23312 22573 22375 22649 23042 22503 23253 22263 23110 22500 23079 22417 23047 22315 23141 22465 23019 22643 22969 22691 22877 22464 23211 22185 23100 22229 23164 22516 23036 22337 23047 22365 23252 22301 23072 22470 22951 22532 22860 22506 23079 21656 22989 22520 22896 22669 22828 22519 23017 22376 23062 22306 22902 22519 22949 22656 22944 22585 22794 22524 23035 22396 23074 22364 23145 22170 23087 22291 22928 22460 22962 22743 22787 22725 22774 22863 22832 22771 22901 22816 22668 22798 22764 22773 22776 22980 22635 22952 22677 22619 22742 22333 22931 22647 23175 22448 22836 22592 22871 22961 22685 22735 22842 22784 22615 23000 22350 22937 22699 22916 22652 22802 22554 23024 22667 22609 22819 23014 22580 22833 22776 23024 22497 22887 22821 23131 22609 22711 22554 23112 22718 22793 22572 22996 22872 22985 22365 23072 22581 23020 22202 22988 22592 23073 22492 23017 22644 23121 22294 23054 22653 23073 22256 23255 22639 22830 22410 23153 22423 22982 22482 23153 22176 23155 22604 22838 22567 23065 22260 23171 22467 23004 22688 23185 22469 23268 22155 23131 22508 23232 22368 23002 22342 23219 22555 22974 22471 23031 22551 23045 22204 23002 22273 23111 22452 23121 22170 23136 22239 23140 22374 23127 22404 23101 22444 23099 22485 23017 22471 23105 22371 23122 22310 23058 22416 23047 22431 23004 22294 22995 22336 22941 22336 22841 22599 22803 22581 22944 22640 22773 22503 23031 22427 23116 22584 22881 22385 22929 22823 22471 22528 22716 22505 23040 22528 22952 22343 22724 22953 22710 22664 22688 22510 23266 22435 22803 22863 22483 22839 22631 22544 23168 22592 22841 22727 22585 22805 22765 22468 23043 22369 22857 22871 22408 23063 22747 22644 22656 23029 22418 23032 22712 22503 22759 22953 22452 22925 22832 22695 22856 23025 22473 23010 22727 22827 22567 23075 22477 22913 22639 22776 22567 23107 22467 22951 22775 22983 22445 23099 22505 23073 22761 23045 22337 23117 22576 22768 22518 23131 22327 23153 22599 23049 22424 23220 22432 23221 22580 23232 22424 23330 22577 22816 22626 23173 22297 23138 22626 22873 22599 23124 22340 23117 22456 23040 21583 23244 22539 9 90 5207 6871 9253 10068 11669 11675 12896 13019 43584 38808 35561 31876 30681 28713 28197 26656 26713 25628 25712 24823 25292 24210 24728 24092 24320 775 7214 9861 11653 13279 14893 14845 16058 16076 43640 39081 35044 31660 30170 28256 27881 26220 26249 25387 25536 24632 24922 24416 24515 23939 24381 23742 7735 11549 14329 15044 16760 17321 17907 18018 18897 38583 34209 30633 29133 27021 26599 25856 25732 24608 25018 24710 24295 23918 24477 23913 23932 23632 10756 13138 15721 17252 18683 18424 19276 19880 20087 19881 32712 29665 27495 26630 25561 25140 24607 24743 24264 24145 23824 24119 23773 23610 23707 23878 23532 16965 18664 19703 19904 20725 21037 21338 20928 21607 21594 27488 25691 25480 24544 24351 23832 24290 23632 23489 23444 23923 23400 23451 23303 23681 22938 23465 23260 23653 22879 23441 23107 23520 22712 23477 23028 23453 22919 23577 22912 23432 22854 23604 22928 23269 22709 23472 22763 23120 22663 23552 22720 23173 22893 23416 22656 23494 22939 23367 22666 23238 22905 23431 22394 23239 22784 23529 22480 23360 22525 23434 22371 23178 22562 23225 22507 23146 22631 23379 22469 23154 22711 23304 22644 23227 22487 23325 22691 23225 22669 23333 22801 23202 22606 23030 22373 23200 22695 23056 22477 23072 22741 23110 22551 23107 22648 22359 22610 23174 22425 23016 22528 23155 22500 22999 22613 23209 22483 23063 22662 22949 22529 23025 22640 23007 22577 22963 22669 23102 22567 23173 22585 22928 22704 23201 22351 22898 22648 23037 22567 22903 22862 23367 22704 23029 22558 22896 22663 22707 22839 22785 22618 23197 22487 22855 22674 22735 22930 22703 22611 23072 22484 23049 22484 22834 23004 22743 22758 22797 22491 23315 22345 22940 22881 22963 22742 22835 22677 22934 22745 22976 22897 22656 23070 22385 23138 22696 22780 22902 22909 22602 23078 22608 22961 22904 22613 22841 23005 22733 22919 22512 23037 22819 22819 22804 22757 22838 23131 22565 22981 22459 23239 22668 22950 22658 22954 22808 22807 22752 22982 22615 23094 22624 23177 22355 23116 22613 23029 22697 22795 22712 23017 22579 23141 22540 23004 22682 22748 22701 23239 22380 23297 22515 23084 22677 23181 22349 23303 22544 23133 22700 23146 22169 23242 22493 22924 22627 23215 22237 23228 22600 22945 22449 23137 22567 22855 22757 23140 22453 23263 22567 23046 22361 23243 22480 22951 22406 23244 22471 23101 22437 23209 22327 23092 22421 23067 22338 22912 22565 22914 22344 23143 22684 22800 22472 23092 22307 23024 22389 23142 22190 23076 22375 23194 22131 23026 22339 23175 22404 23201 22400 23084 22128 23035 22361 23064 22356 22941 22577 23055 22355 23031 22593 22877 22478 22883 22577 22867 22407 22912 22699 22799 22348 22979 22604 22768 22458 22931 22665 22772 22448 23056 22565 22988 22528 22916 22647 22752 22497 23095 22440 23185 22509 23100 22424 23309 22488 23164 22508 23012 22427 23093 22452 23366 22532 23211 22447 22769 22653 23079 22529 23054 22532 23152 22567 22712 22554 22972 22763 22775 22506 23109 22784 22571 22412 22933 23003 22573 22418 22839 22859 22810 22416 22871 22832 23017 22594 22733 22747 101 2476 6117 8282 10493 10869 12148 12349 13397 43653 41879 36939 33876 31684 29420 4990 9640 12463 14144 14877 15849 16550 16947 17273 43430 40716 35696 32850 30228 29201 8664 12886 15125 16603 17903 18535 18855 19335 19213 19521 37177 33244 30571 28825 27596 14119 15717 17828 18663 19291 19804 20487 20555 20922 20522 34064 30279 28599 27147 26503 25584 19929 20548 21486 21092 21611 21720 22097 21888 22205 28295 27354 25949 25888 24988 24768 24438 24749 24263 24412 23793 24048 23590 24291 23725 24093 23247 23697 23424 23909 23382 23748 23015 23600 23290 23767 23123 23417 22933 23784 23052 23766 22924 23399 22879 23769 22976 23591 22706 23330 22873 23717 22960 23453 22660 23453 22991 23553 22806 23212 22624 23412 22977 23479 22776 23071 22756 23465 22935 23407 22560 23194 22657 23592 22682 23361 22604 23577 22566 23232 22735 23397 22530 23344 22520 23296 22595 23333 22670 23115 22656 23144 22773 23190 22746 23123 22448 23348 22450 23400 22599 23002 22488 23106 22538 23325 22669 23140 22366 23280 22441 23428 22437 23127 22446 23181 22550 23399 22544 23016 22448 23136 22650 23296 22537 
