# Supplementary material for: An Active Feature Selection Strategy for DWT in Artificial Taste
Source: Hindawi journal article supplement (doi:10.1155/2018/9709505), 2018-01-01
Supplement: f1 [file 9709505.f1.zip › redWine-med-1.txt]

43448 43905 43464 43456 55 49 14797 17988 20618 21408 22549 22586 23180 23017 23431 23296 23780 23827 23644 23725 23762 23782 23897 23789 24039 23796 23913 23901 24153 23954 24005 23944 24199 23974 24160 23914 24069 23945 24115 23952 24084 24018 24209 24096 24152 24032 24096 24035 24119 24117 24029 24426 24016 24439 24096 24456 24138 24450 24083 24420 24224 24459 24210 24456 24135 24429 24184 24576 24140 24477 24205 24569 24208 24622 24093 24689 24175 24600 24242 24496 24244 24458 24197 24535 24165 24560 24172 24570 24082 24628 24068 24656 24006 24618 24081 24663 24113 24716 24148 24684 24077 24816 24076 24748 24180 24864 24156 24844 24211 24932 24268 24998 24332 24960 24388 24953 24315 24956 24437 24918 24441 24999 24407 25051 24332 24972 24400 25038 24057 24912 24050 24792 24149 24724 24160 24761 24142 25263 24323 24803 24257 24629 24152 24634 24116 24795 24088 24844 24136 24865 24305 24898 24195 24926 24320 24873 24344 24899 24408 24852 24330 24852 24393 24888 24394 24810 24339 24729 24314 24827 24353 24850 24357 24786 24296 24708 24281 24647 24325 24773 24321 24640 24280 24624 2469 17863 20374 22092 22187 22964 22637 22936 22662 22860 33085 27344 25794 25309 25019 25029 24601 24728 24495 24800 24694 24897 24579 24720 24664 24770 24658 24692 24635 24694 24563 24634 24513 24475 24512 24456 24369 24581 24373 24661 24599 24678 24669 24549 24794 24370 24704 24313 24926 24585 25002 24712 24777 24405 24527 24552 24993 24640 24832 24515 24681 24487 24953 24503 24733 24472 24961 24485 24852 24491 25045 24597 24550 24471 24953 24401 24761 24505 24950 24211 25172 24228 24965 24558 24994 24211 25021 24552 24722 24423 25033 24077 25013 24352 24779 24358 25076 24064 25157 24320 24793 24363 24928 24292 25074 24209 24893 24480 24809 24347 25048 24152 24999 24455 24772 24384 25097 24217 24900 24294 24902 24224 24912 24273 24890 24292 24949 24256 24849 24456 24757 24239 25007 24071 24921 24230 24742 24142 24814 24310 24741 24176 24924 24268 24828 24172 24910 24286 24808 24294 24876 24293 24772 24330 24843 24245 24617 24328 24892 24303 24773 24300 24756 24340 24676 24337 24820 24514 24657 24285 24748 24455 24717 24121 24552 24391 24865 24356 24558 24345 24708 24682 24756 24142 24643 24545 24691 24692 24614 24145 24469 24472 20922 22641 22937 23014 23250 23168 23453 23591 23737 36593 26968 25531 25173 24980 25254 25092 24921 24656 24855 24632 24920 25012 24666 24977 24549 24866 24295 24967 24512 24990 24693 24929 24673 24944 24656 24855 24536 24725 24368 24796 24423 24766 24557 24996 24580 25081 24514 24960 24579 24841 24469 24841 24229 24789 24216 24800 24256 24854 24393 24890 24448 24861 24503 25034 24521 25062 24398 25106 24422 25040 24345 24993 24305 24967 24244 24956 24112 24800 24132 24771 24136 24688 24116 24704 24164 24808 24183 24774 24082 24917 24092 24944 24244 24936 24181 24872 24145 24772 24211 24826 24229 24787 24110 24759 24228 24768 24320 24814 24128 24833 24080 24940 24096 24871 24035 24753 24207 24664 24201 24832 24119 24755 24290 24693 23605 24615 24454 24853 24312 24674 24167 24621 24177 24761 24296 24807 24320 24874 24467 24832 24422 24848 24392 24896 24464 24844 24448 24781 24445 24752 24456 24618 24490 24678 24622 24618 24461 24611 24369 24591 24347 24516 24376 24483 24362 23851 24368 24421 24285 24424 24296 24435 24329 24437 24380 24572 24451 24687 24744 24757 24722 24913 24713 24690 24760 24604 24816 24508 24902 24394 24873 18748 22979 23136 23633 23453 23857 23506 23785 23556 23892 27047 25704 25004 25276 24700 25094 24555 25065 24652 24983 24596 25043 24647 24921 24517 24937 24492 24833 24329 24906 24132 24727 24205 24789 24240 24882 24268 24992 24361 25031 24440 24999 24514 25070 24416 25067 24290 25024 24235 24943 24156 24773 24253 24714 24137 24677 24165 24768 24243 24956 24322 25074 24304 24962 24341 24999 24174 24947 24212 24764 24183 24775 24082 24908 24054 24826 24117 24775 24209 24960 24156 24996 24212 24941 24112 24842 24167 24771 24195 24846 24096 24849 24085 24704 24301 24757 24151 24664 24251 24656 24256 24784 24359 24852 24440 24761 24342 24768 24282 24809 24338 24677 24196 24656 24285 24667 24301 24655 24280 24549 24245 24472 24266 24489 24371 24704 24520 24791 24604 24747 24538 24781 24552 24704 24516 24687 24554 24602 24490 24538 24474 24521 24441 24430 24333 24400 24301 24505 24225 24450 24260 24471 24143 24429 24295 24449 24508 24282 24592 24280 24774 24339 24888 24442 24836 24443 24705 24587 24836 24492 24775 24577 24765 24399 24777 24309 24551 23750 24491 24189 24936 24344 24631 24156 24608 24245 24544 24189 24547 24173 24680 24119 23088 23212 23976 23491 24080 23661 24237 23757 24280 27994 25672 24646 25173 24478 25092 24357 25013 24233 24909 24238 24811 24071 24748 24132 24784 24301 24916 24338 25016 24445 24975 24421 24797 24166 24928 24436 25017 24196 24754 24022 24880 24283 24695 24159 24837 24202 24743 24174 24855 24092 24826 24250 24711 24298 24732 24042 24937 24059 24669 24249 24696 24068 24971 24067 24768 24199 24672 24280 24617 24209 24748 24157 24667 24171 24636 24293 24698 24411 24704 24308 24730 24251 24525 24304 24636 24256 24696 24226 24704 24256 24728 24272 24664 24232 24700 24256 24658 24352 24668 24269 24540 24438 24583 24306 24622 24417 24624 24389 24791 24298 24752 24234 24731 24325 24494 24545 24368 24708 24452 24312 24741 24232 24777 24194 24592 24531 24435 24524 24613 24246 24740 24218 24470 24835 24315 24332 24736 24324 24435 24624 24202 24869 24308 24564 24455 24876 24151 24808 24465 24557 24343 24697 24384 24465 24493 24649 24306 24671 24528 24698 24202 24784 24392 24526 24109 24794 24426 24647 24023 24986 24337 24727 24224 24888 24349 24669 24016 24729 24430 24768 24148 25141 24295 24923 24227 24668 24203 25005 24277 24726 24081 23240 23832 24530 23916 24464 23759 24540 24046 24576 23969 25313 24118 24967 24336 25024 24244 24916 24017 25265 24325 24920 24291 24905 24188 24615 24197 24864 24405 24832 24272 24787 24026 24817 24224 24982 24243 25015 24161 24759 23987 24860 24127 24635 24169 24903 24312 24634 24112 24655 24168 24604 24232 24813 24263 24801 24104 24665 23948 24657 24078 24823 24086 24891 24214 24777 23985 24641 24192 24676 24103 24673 24111 24698 24197 24689 24372 24683 24269 24545 24100 24748 24628 24620 24241 24632 24301 24672 24213 24728 24231 24733 24327 24728 24306 24645 24247 24562 24081 24669 24295 24509 24252 24591 24144 24711 24214 24649 24300 24634 24332 24723 24331 24660 24444 24736 24506 24798 24469 24708 24444 24576 24401 24473 24373 24500 24148 24357 24151 24372 24132 24373 24397 24341 24220 24345 24245 24346 24117 24374 24229 24357 24215 24428 24250 24257 24280 24348 24209 24362 24315 24381 24260 24387 24257 24215 24186 24334 24225 24432 24433 24492 24237 24288 24081 24290 24304 24369 24257 24044 24336 24263 24668 24365 24727 24384 24755 24349 24794 24436 24841 24488 24768 24326 24749 24394 24589 24819 24367 24173 24471 24269 24524 24351 24584 24443 24743 24448 24819 24392 24801 24345 24715 24210 24692 24029 24490 24121 24598 24288 24695 24393 24889 24455 24777 24504 24760 24302 24657 23996 24482 24135 24629 24241 24785 24355 24857 24386 24832 24331 24686 24214 24549 24102 24603 24256 24816 24356 24836 24311 24807 24115 24621 23868 24588 24128 24865 24297 25008 24280 24871 24090 24943 23893 24726 24080 24922 24234 24985 24236 24919 24092 24705 23949 24664 24139 24879 24256 24854 24307 24903 24283 24686 24023 24564 24098 24710 24221 24837 24274 24953 24220 24803 23941 24602 23936 24758 24109 24885 24102 24765 24095 24740 24055 24784 24033 24628 24183 24809 24174 24663 24065 24664 24069 24532 24116 24566 24130 24754 24166 24870 24032 24728 24042 24731 24001 24649 24014 24791 24151 24797 24043 24653 24076 24632 23960 24567 23993 24736 24178 24762 24242 24640 24176 24576 24120 24567 23974 24612 24128 24598 24292 24670 24185 24672 24224 24555 24212 24302 24039 24555 24096 24608 24268 24695 24224 24592 24320 24596 24121 24614 24165 24355 24050 24518 24080 24717 24376 24695 24284 24599 24290 24455 24269 24436 24168 24341 24133 24283 24109 24564 24486 24629 24448 24737 24359 24447 24356 24517 24204 24452 24192 24274 24190 24530 24599 24780 24603 24549 24341 24481 24299 24349 24153 24180 24214 24320 24291 24608 24580 24726 16508 21591 22109 22387 22375 22573 22450 22566 22696 43462 29504 26280 25330 25228 25114 24964 24887 24680 24880 24588 25015 24712 24960 24384 24835 24192 24580 20023 22567 22788 23264 23144 23494 23390 23618 23442 37543 27136 25748 25030 25161 24647 24968 24492 24718 24360 24832 24467 24905 24560 24889 24513 24978 4339 22544 22965 23680 23082 23688 23383 23857 23437 24060 29184 25988 25108 25280 24667 25109 24588 24990 24360 24951 24228 24728 24192 24911 24354 24989 24404 19401 23107 24103 23617 24110 23819 24186 23523 24189 23687 26732 24812 25285 24523 25172 24391 25079 24229 24990 24256 24838 24082 24759 24163 24809 24261 24942 22669 24388 23956 24550 23899 24412 23927 24384 23735 24347 24697 25015 24268 25056 24192 25101 24169 24798 24103 24746 24151 24205 23988 24728 24147 24805 24354 24833 24236 24784 24096 24722 24204 24637 23949 24589 24052 24803 24120 24951 24129 24827 24170 24712 24139 24720 24055 24602 24000 24608 24119 24608 24168 24727 24333 24668 24271 24616 24297 24568 24145 24600 24185 24651 24002 24660 24305 24667 24364 24624 24241 24737 24133 24553 24156 24832 24279 24471 24215 24715 24311 24750 24175 24615 24229 24534 24183 24552 24125 24696 23983 24503 24224 24689 24418 24590 24348 24609 24320 24608 24174 24530 24364 24263 24208 24549 24396 24808 24517 24692 24410 24561 24387 24466 24321 24416 24596 24391 24069 24433 24467 24716 24689 24680 24563 24517 24283 24428 24377 24346 24215 24339 24276 24291 24322 24524 24568 24729 24758 24684 24497 24462 24296 24424 24197 24177 24036 24226 24210 24426 24459 24544 24534 24421 24508 24343 24705 24495 24788 24297 24741 24198 24371 24181 24462 24137 24557 24337 24720 24439 24629 24409 24775 24424 24730 24308 24594 24261 24414 24163 24426 24242 24620 24320 24689 24384 24775 24325 24817 24276 24717 24242 24408 24212 24420 24086 24579 24078 24647 24263 24837 24249 24805 24353 24777 24440 24791 24171 24759 24116 24652 23960 24600 23956 24592 24135 24687 24301 24803 24314 24784 24330 24783 24195 24720 24047 24570 23952 24673 23902 24709 24113 24760 24169 24893 24208 24885 24208 24965 24218 24839 24112 24820 24546 24539 24042 24564 23956 24627 24065 24724 24236 24704 24283 24813 24208 24949 24192 24914 24093 24769 24006 24843 23882 24634 23929 24691 24026 24814 24144 24813 24126 24753 24083 24744 24037 24699 24073 24643 24092 24585 24033 24962 24001 24530 24093 24680 24104 24672 24135 24839 23985 24792 23908 24742 24024 24644 24014 24600 23942 24629 23941 24557 24070 24633 24084 24688 24236 24622 24279 24641 24154 24563 24185 24500 24166 24620 24167 24433 24218 24527 24113 24597 24144 24495 24035 24565 24204 24678 24160 24652 24254 24676 24165 24529 24137 24615 24204 24497 24132 24540 24076 24554 24096 24460 23943 24586 24074 24441 24048 24487 24213 24608 24288 24563 24358 24637 24457 24682 24423 24672 24423 24534 24235 24481 24285 24473 24230 24585 24241 24325 24253 24216 24156 24320 24144 24307 24091 24357 24118 24246 24115 24358 24100 24407 24290 24450 24357 24592 24576 24720 24647 24800 24545 24592 24404 24536 24410 51 19766 21633 21991 22279 22297 22729 22424 22624 22753 34356 27840 25414 25401 24808 25093 20385 22791 22740 23464 23155 23576 23303 23666 23356 38528 27164 25727 25025 25019 24613 19780 22652 23496 23591 23872 23735 23897 23565 23717 23536 27029 25301 25328 24655 24905 17632 23573 23558 24164 23480 24179 23740 24375 23816 24087 26534 25488 24762 25080 24220 25005 23558 24374 23735 24437 23992 24681 23875 24261 23939 26862 24736 24866 24272 24937 24478 24872 24151 24680 24320 24929 24306 24673 24229 24928 24337 24844 23983 24864 24338 24940 24142 24695 24096 24969 24231 24759 23880 24875 24206 24967 24072 24704 24147 24949 24261 24769 23956 24722 24305 24856 24195 24537 24139 24836 24288 24720 24037 24988 24248 24832 24258 24604 24012 24855 24148 24849 24010 24910 23905 24804 24064 24849 23936 24644 24096 24694 24129 24631 23969 24772 24083 24845 24173 24616 24201 24602 24214 24672 23912 24624 24021 24749 24171 24696 23845 24596 24080 24678 24133 24576 23879 24629 24025 24804 24116 24551 24052 24528 24118 24696 24071 24756 23954 24594 24164 24657 24116 24494 24087 24700 24186 24476 24170 
20800 21399 20694 21196 20777 21362 20630 21275 20718 21058 20817 21261 20544 21187 20885 21155 20606 21425 20609 21320 20728 21319 20533 21331 20784 21072 20746 21393 20454 21312 20777 21162 20578 21376 20575 21307 20799 15149 14604 15402 14761 15705 15081 15822 15213 16087 15398 16278 15536 16430 15693 16499 15909 16829 15989 17004 16108 17159 16242 17080 16487 17177 16505 17493 16658 17495 16731 17460 16941 17624 16889 17645 17159 17750 17103 17848 17385 17842 17318 17931 17435 17953 17425 17986 17510 18128 17556 18064 17600 18107 17639 18209 17639 18296 17618 18219 17761 18304 17837 18345 17938 18498 18061 18457 18154 18581 18280 18626 18496 18816 18487 18785 18461 18828 18667 18839 18677 18770 18459 18793 18469 18775 18545 18721 18558 18809 18597 18833 18631 18739 18560 18661 18569 18728 18501 18787 18656 18599 18963 18742 18952 18711 19009 18606 19075 18729 19081 18827 19008 18843 19090 18912 19239 18994 19212 18970 19269 19040 19432 19033 19370 19017 19580 18992 19456 19069 19609 19060 19632 19164 19544 19169 19568 19240 19591 19149 19736 19124 19808 19188 19799 19188 19816 19232 59 62 56 59 56 59 861 1355 3637 3707 34956 24897 22809 20712 20967 19752 20233 19441 20108 19322 20153 19341 19988 19299 19984 19284 19929 19273 20042 19120 19991 19219 20044 19052 19987 19315 19735 19261 19983 19159 19994 19325 20005 19517 20144 19224 19936 19485 20044 19124 20215 19510 20139 19116 20133 19295 20040 19308 20126 19305 20053 19401 20029 19568 19996 19463 20085 19524 19929 19407 20110 19681 19978 19475 20067 19521 19895 19541 20145 19563 20067 19490 20014 19681 20224 19318 20097 19704 19933 19772 20254 19529 20104 19915 19888 19684 20111 19633 20053 19829 19704 19757 19919 19657 20124 19819 19848 20032 19841 19740 20330 19533 20019 20287 19888 19749 20317 19628 19861 20144 19863 19689 20277 19712 19879 19988 19991 20168 19961 20129 19791 20411 19792 20184 20022 20295 19741 20246 20101 20031 19863 20368 20040 20054 19963 20315 19872 20089 19913 20399 19912 20165 19809 20459 19866 20087 19975 20411 19911 20200 19874 20628 19832 20285 19514 20585 19865 20538 19614 20439 19948 20571 19687 20328 19815 20625 19826 20343 19546 20600 19877 20659 19655 20457 19771 20775 19875 20571 19737 20422 19906 65 2601 7847 9029 10897 11114 12559 12260 13408 12849 39936 25048 22987 20821 21308 20252 20976 20096 20571 19937 20611 19859 20551 20026 20591 20057 20600 19771 20330 19737 20429 19851 20653 19783 20680 19840 20643 19829 20548 19767 20509 19893 20504 19860 20441 19906 20420 20040 20529 20069 20551 20119 20371 19889 20387 19928 20368 19968 20282 19979 20483 19976 20379 19962 20503 20070 20526 20152 20613 20297 20609 20314 20603 20259 20565 20210 20438 20022 20283 19978 20372 20007 20187 19888 20215 19875 20298 19949 20231 19951 20355 19886 19895 20036 20185 19971 20269 20151 20181 20163 20280 20103 20246 20224 20359 20617 20326 20664 20196 20645 20200 20608 20139 20572 20280 20523 20203 20480 20224 20502 20228 20446 20151 20647 20169 19978 20122 20607 19908 20501 19926 20405 20035 20404 19953 20620 19983 20541 20015 20666 20128 20618 20143 20804 20163 20814 20156 20841 20213 20801 20235 20872 20086 20926 20162 20941 20164 20947 20129 20996 20093 20888 20006 20708 20081 20718 20320 20518 20041 20599 19886 20535 19811 20656 19847 20606 19904 20775 20027 20884 19994 20945 20087 20812 20084 20693 20121 20632 20103 20659 19989 20717 7254 13333 13966 15504 15285 16488 15818 16731 16288 17080 25016 22507 20838 21126 20529 20857 20266 20842 20282 20758 20209 20619 20206 20666 20115 20668 20020 20676 20145 20755 20008 20672 20081 20695 20121 20682 20249 20773 20377 20723 20467 20680 20469 20800 20331 20689 20184 20545 20192 20438 20329 20459 20313 20290 20242 20505 20340 20687 20485 20769 20640 20853 20599 20704 20516 20552 20358 20541 20285 20408 20258 20528 20396 20357 20242 20170 20471 20206 20623 20329 20829 20283 20748 20385 20701 20524 20802 20646 20810 20488 20731 20487 20701 20279 20651 20437 20630 20188 20609 20069 20712 20087 20759 20279 20826 20407 20965 20343 20877 20308 20952 20291 20999 20296 20920 20196 20974 20041 20874 20103 20744 20028 20792 20087 20892 20170 20946 20219 21058 20172 21089 20183 21015 20213 20944 20312 20984 20366 21045 20379 20995 20431 20996 20279 20951 20217 20855 20540 20784 19933 20816 20000 20800 19969 20833 20068 20847 20135 20801 20330 20854 20172 20920 20087 20999 20071 20916 20087 20983 20085 20864 20040 20814 20195 20798 20215 20777 19881 20673 20182 20620 20288 20853 20022 20672 20191 20656 20161 20772 20183 20704 2748 16343 17079 18135 17771 18496 18055 18746 18258 18749 25778 21868 20924 21095 20702 20970 20682 20885 20628 20775 20433 20616 20390 20449 20244 20555 20380 20583 20281 20571 20496 20912 20757 20640 20224 20593 20480 21035 20625 20441 20311 20723 20656 20406 20445 20888 20449 20438 20695 20496 20872 20503 20668 20507 20827 20305 20982 20419 20765 20688 20769 20234 20936 20535 20816 20549 20727 20521 20933 20161 21004 20368 20919 20480 20771 20485 20697 20573 20822 20447 20850 20369 20981 20457 20992 20187 21047 20092 21097 20214 21130 20148 21111 20160 21013 20136 21217 20199 21050 20166 21059 20048 21149 20160 21190 20115 21166 20120 21122 20161 21127 20260 21015 20360 20897 20436 20868 20436 21088 20373 21158 20247 21047 20388 20782 20391 20938 20275 21130 20148 21217 20359 20880 20213 21051 20039 20946 20214 21011 20240 20906 20302 20817 20492 20970 20258 21115 20157 21040 20158 20954 20123 21049 20161 20754 20179 21092 20113 20915 20233 20941 20140 20807 20294 20939 20215 20876 20517 20903 20259 20855 20445 20776 20743 20883 20459 20844 20224 20832 20373 20939 20272 20781 20292 20979 20490 20833 20200 20770 20467 20901 20125 18018 19140 19834 19596 19813 19443 19816 19659 19945 29972 21429 20512 20685 20584 20754 20776 20720 20377 20644 20530 20736 20678 21111 20471 20528 20404 20643 20547 20996 20787 20609 20308 20577 20443 20723 20656 21030 20727 20661 20336 20641 20434 20750 20728 20996 20779 20673 20389 20800 21037 20685 21027 20618 20962 20472 20769 20338 20758 20457 21132 20621 20999 20627 20839 20491 20647 20455 20679 20545 20864 20648 20960 20622 20949 20661 20947 20390 20840 20352 20745 20466 20908 20592 21047 20591 21104 20567 21155 20631 21092 20584 20987 20500 20887 20384 20901 20221 20867 20275 20985 20613 20974 20403 20980 20511 21203 20508 21149 20661 21089 20538 21216 20517 21161 20495 21109 20455 21096 20387 21080 20206 21045 20284 21072 20163 20987 20180 20936 20086 20943 20151 20857 20264 20911 20334 21090 20440 21084 20453 21105 20450 21164 20489 21109 20430 21113 20525 21163 20461 21127 20402 21215 20249 21276 20146 21055 20121 21053 20197 20977 20234 20901 20263 20900 20252 20829 20377 20906 20374 21014 20523 21032 20535 20970 20409 20974 20416 21027 20287 21060 20324 20962 20283 20937 20196 20900 20400 21099 20225 21023 20235 21196 20332 21236 20408 21104 20386 20937 20448 20844 20410 20869 20401 20858 20199 20889 20405 20889 20597 21024 20529 21049 20423 20981 20525 20792 20304 20238 20275 20854 20438 21021 20561 20984 20453 20983 20409 20879 20369 20887 20537 20773 20301 21016 20533 20977 20433 20903 20536 20825 20519 20646 20405 20837 20581 21001 20608 20935 20625 20817 20535 20499 20353 20796 20615 20976 20795 20793 20585 20801 20540 20754 20253 20841 20737 21250 20876 20974 20576 20701 20451 20709 20503 20640 20612 21062 20951 20960 20625 20775 20540 20663 20353 20546 20435 20817 20723 21027 20931 20955 20612 20679 20437 20597 20579 20697 20692 20977 20925 20848 20993 20777 20971 20952 20775 20398 20961 20658 21061 20618 21119 20749 20993 20554 20839 20458 20744 20700 20967 20765 21013 20780 21076 20679 20871 20608 20689 20523 20828 20611 21056 20623 21190 20633 21095 20803 20943 20327 20909 20488 21096 20646 21104 20772 21129 20838 20948 20440 20889 20352 20873 20388 21061 20567 21213 20517 21291 20515 21144 20361 21111 20243 20904 20352 20995 20512 21207 20615 21212 20667 21313 20707 21192 20513 21129 20580 21048 20219 21014 20304 21173 20451 21283 20445 21264 20535 21309 20471 21185 20421 21083 20212 20980 20372 21168 20564 21305 20597 21275 20613 21248 20503 21148 20416 20963 20204 21077 20349 21107 20440 59 4068 7995 8305 10012 9967 11230 10934 11854 43322 32496 24290 22920 21431 21723 20869 21349 20464 21107 20613 21033 20387 21031 20185 21047 20395 106 6041 12145 13119 14639 14469 15448 14992 15984 15297 42392 25687 23249 21429 21579 20727 21373 20455 21070 20644 21186 20624 21248 20608 21082 20560 21029 55 13629 15335 16720 16794 17513 17218 17954 17621 18227 28720 23483 21480 21472 20837 21166 20555 21145 20547 21193 20522 20992 20585 21097 20573 21127 20668 12250 17004 18346 18315 18898 18389 19048 18642 19169 18970 24294 21847 21473 20951 21064 20857 21011 20659 20852 20720 20819 20502 20802 20759 21163 20955 21200 17938 19623 19646 19797 19527 19936 19831 19927 19625 30151 21649 21317 21063 21317 21019 21032 20736 20884 20609 20761 20698 20700 20529 20774 20747 20894 20979 21159 20965 20864 21074 20779 21024 20661 21149 20456 20908 20529 20952 20609 21113 20775 21105 20872 21049 20861 21076 20775 20703 20637 20871 20516 20879 20596 21090 20724 21095 20750 21329 20722 21187 20589 21380 20426 20960 20466 21064 20508 21143 20669 21248 20754 21204 20681 21019 20648 20916 20439 21033 20464 21232 20521 21289 20679 21271 20722 21223 20515 20969 20366 21017 20487 21065 20510 21321 20648 21272 20668 21255 20608 21292 20432 21063 20265 21079 20369 21267 20473 21281 20526 21377 20555 21381 20568 21307 20461 21011 20335 21047 20377 21159 20463 21264 20619 21232 20705 21319 20711 21227 20551 21143 20324 21186 20206 21191 20325 21216 20533 21337 20364 21306 20296 21195 20353 21086 20315 21352 20318 21175 20379 21200 20544 21177 20592 21120 20596 21063 20514 21115 20365 21121 20305 21253 20186 21114 20233 21315 20391 21353 20420 21237 20345 21196 20383 21155 20297 21100 20332 21104 20337 21120 20413 21240 20563 21079 20536 21060 20493 21067 20480 20915 20548 21227 20429 20966 20415 21067 20473 21152 20627 21089 20615 21072 20560 21069 20461 21013 20482 20935 19941 20922 20483 20904 20450 21007 20508 21173 20691 21088 20546 21083 20610 20929 20610 20950 20718 20769 20553 20786 20633 20919 20804 21101 20870 21178 20773 20993 20723 20961 20787 20846 20673 20813 20481 20749 20455 20872 20556 20931 20725 21138 21069 21205 20993 21012 20846 20941 20599 20830 20647 20811 20526 20792 20579 20754 20512 20809 20687 21111 21013 21219 21009 21115 20899 20973 20760 20839 20783 20893 21075 20750 21143 20483 20864 20551 20954 20466 21014 20649 21120 20776 21163 20731 21211 20889 21162 20876 20951 20812 21059 20633 20861 20554 20985 20583 20999 20711 21061 20717 21144 20775 21185 20814 21299 20660 21369 20664 21184 20648 21024 20615 21602 20390 20941 20468 20837 20695 20992 20637 21229 20656 21201 20715 21273 20705 21399 20577 21400 20732 21250 20732 21163 20561 21164 20601 21101 20469 21065 20354 21095 20444 21096 20486 21242 20519 21156 20593 21323 20608 21381 20672 21365 20648 21460 20579 21449 20621 21449 20555 21446 20599 21192 20595 21248 20444 21314 20364 21046 20481 21064 20443 21070 20416 21104 20412 21173 20425 21200 20512 21358 20447 21376 20533 21389 20443 21221 20517 21199 57 2324 6844 9780 10375 11351 11376 12449 12225 13242 41094 27876 22938 22225 21260 21461 7618 13223 14041 15637 15108 16398 15713 16698 16055 43346 26225 23408 21641 21841 20768 10423 14986 17416 17188 18231 17598 18527 17894 18455 42752 25411 22208 22037 21285 21446 10991 17828 18281 19335 18812 19267 19027 19454 19131 19622 24109 22181 21317 21607 20855 11568 18897 20189 19701 20179 19788 20339 19782 20247 19893 24003 21252 21408 20858 21324 20975 21425 20635 20385 20808 21266 20922 21148 20732 21129 20949 21117 20590 21082 20899 21266 20787 20844 20656 21122 21032 21018 20705 20912 20922 21313 20828 20914 20611 20992 21037 21185 20552 20896 20731 21242 21183 20779 20615 21018 21033 21205 20614 20871 20765 21152 21155 20775 20779 20851 21125 21212 20600 20856 20741 21030 21048 20983 20661 20865 20913 21143 20935 20779 20677 20864 21157 20779 20844 20677 21243 20855 21195 20677 20881 20744 21377 20779 21164 20613 20938 20840 21209 20876 21080 20499 20887 21073 21077 20866 20861 20590 21136 20821 21206 20833 20885 20579 21155 20824 21223 20647 20942 20660 21356 20880 21131 20533 21120 
21184 21686 21363 21543 21148 21796 21143 21668 21404 21621 21154 21728 21106 21609 21149 21721 21188 21558 21319 21998 21237 21786 21372 21596 21397 21559 21181 21856 21138 21550 21313 21642 21210 21634 21235 21536 21313 21607 21208 21547 21446 21633 21271 21847 21079 21531 21448 21632 21095 21511 21537 21359 21229 21831 21285 21481 21418 21597 20648 21630 21630 21314 21264 21830 21382 21344 21292 21715 21366 21485 21674 21399 21175 21703 21342 21030 21175 21008 21216 21035 21134 21024 21084 21033 21144 21005 21147 20891 21268 20882 21177 20878 21223 20809 21281 20833 21265 20984 21288 20960 21400 21007 21367 20963 21400 21052 21441 21015 21511 21044 21573 21060 21521 21106 21560 21090 21569 21128 21595 21153 21516 21096 21544 21073 21559 21089 21579 20906 21428 20801 21476 20887 21289 20891 21422 20942 21342 20952 21475 20865 21332 21026 21376 20985 21425 20914 21511 20803 21500 20984 21494 20964 21509 20864 21573 21120 21584 21074 21495 21072 21543 21005 21408 20976 21353 21033 21432 21036 21507 20993 21402 20903 21376 20936 21351 20874 21396 21004 21381 20983 21360 21005 21408 21013 26 530 3819 5392 7066 7543 8529 8615 9191 37014 23472 21206 21016 20519 20595 20391 20707 20471 20746 20498 20845 20654 20905 20618 20855 20705 20890 20626 21040 20645 20835 20573 20814 20564 20678 20608 20681 20541 20705 20660 20887 20953 20907 20963 20756 20811 20512 20872 20805 21040 20928 21021 20818 20744 20708 20864 20983 20972 20867 20784 20688 20960 20970 21113 20659 20877 20921 21187 20638 20974 20979 21017 20704 21063 20931 20824 20813 21157 20676 21080 20794 20995 20745 21144 20816 21060 20960 21168 20555 21159 20751 20946 20832 21260 20556 21306 20800 20966 20828 21180 20633 21308 20616 21200 20829 21003 20747 21312 20587 21248 20844 20992 20808 21307 20728 21316 20851 21121 20711 21361 20609 21179 20821 21090 20708 21189 20737 21129 20763 21196 20636 21214 20714 21153 20563 21377 20590 21159 20752 21191 20624 21175 20755 21058 20645 21180 20803 20993 20663 21181 20839 21137 20664 21106 20921 21088 20740 21152 20777 21043 20658 21131 20892 21128 20848 21113 20715 21251 20519 21111 20757 21223 20664 21048 20763 21189 20983 21025 20736 21107 20901 21312 20880 20915 20711 21088 20979 21298 20775 21045 20709 1694 9814 11494 11706 12534 12622 13255 13274 13946 13944 25360 21380 21144 20637 21072 21030 21127 20730 20673 20387 20810 21097 20858 20943 20826 20998 20701 20724 20492 20881 20836 21079 20951 20965 21017 20953 20906 20904 20821 20757 20572 21017 20871 20984 20833 21211 20932 21110 20905 21107 20972 20985 20763 21075 20659 20903 20555 21063 20646 21013 20778 21038 20864 21159 20939 21269 20874 21219 20787 21287 20840 21323 20771 21280 20744 21222 20638 21127 20633 21113 20620 21040 20601 20968 20634 21045 20601 20999 20565 21057 20557 21069 20631 21176 20693 21210 20718 21065 20574 21172 20655 21174 20613 21177 20621 21269 20755 21152 20634 21129 20593 21235 20656 21248 20515 21208 20683 21217 20656 21146 21201 21111 20695 21264 21031 21128 20848 21322 20598 21038 20654 21096 20750 21110 20800 21206 20797 21255 20769 21319 20794 21204 20873 21275 20801 21290 20846 21330 20884 21315 20883 21312 20871 21136 20817 21104 20829 21153 20916 21149 20861 21067 20633 21005 20771 20977 20904 21112 20884 20942 20743 21047 20621 21005 20778 21112 20896 21152 21145 21450 21217 21506 21191 21244 21008 21232 21111 21125 21291 21113 21248 20959 13730 15216 15922 15971 16527 16679 16794 17052 17201 29473 21985 21272 21120 21001 21195 20897 21175 20999 21170 21010 21158 21032 21083 21034 21025 20896 21056 20850 21146 20630 20925 20735 21100 20761 21155 20829 21253 20935 21300 20919 21286 20963 21296 20967 21333 20850 21269 20736 21287 21133 21180 20773 21132 20653 21128 20743 21185 20771 21283 20887 21475 20913 21412 20885 21389 20718 21418 20776 21191 20752 21170 20832 21268 20706 21241 20784 21336 20859 21322 20826 21363 20776 21306 20760 21344 20768 21257 20707 21196 20747 21308 20668 21175 20846 21349 20775 21213 20781 21218 20736 21403 20967 21353 20902 21329 20923 21401 20805 21223 20782 21194 20857 21240 20800 21187 20832 21336 20677 21210 20697 21068 20757 21190 20913 21383 21056 21443 21137 21463 21124 21386 21044 21371 20977 21328 21006 21217 20856 21187 20842 21205 20767 21109 20737 21104 20717 21100 20893 20994 20741 21144 20802 21082 20906 21147 21099 20937 20830 21048 21234 21114 21308 21207 21239 21114 21316 21253 21255 21160 21256 21270 21237 21077 21179 20992 21107 20999 21289 21040 21204 21043 21161 20737 21034 20901 21051 20969 21121 20906 21230 20869 15248 18045 18919 18735 19189 19089 19430 19207 19522 19245 22613 21142 21435 20977 21464 20992 21476 20951 21346 20862 21298 20800 21270 20744 21148 20746 21069 20839 21381 20921 21440 21051 21416 20819 21385 20864 21484 20992 21360 20839 21447 20844 21431 20743 21297 20854 21303 20846 21291 20887 21340 21019 21216 20898 21500 20788 21392 20890 21384 20813 21479 20640 21389 20997 21332 20885 21367 20855 21431 20774 21289 20936 21256 20985 21392 20913 21248 20923 21504 20847 21443 20781 21448 20880 21360 20894 21353 20819 21345 20759 21339 20871 21405 20880 21294 20747 21316 20844 21273 20759 21411 20936 21328 20753 21352 20826 21254 20880 21292 21025 21301 21107 21204 21253 21281 20939 21223 20975 21520 20979 21272 21047 21173 21277 21339 21024 21248 20896 21504 20873 21196 21399 21107 21006 21432 21076 21301 21197 21169 21063 21015 21306 21255 21213 20825 21428 21133 21256 21302 21368 20829 21241 21282 21158 21075 21367 21268 21036 21224 21422 21031 21686 21232 21356 20994 21184 21211 21414 20951 21365 21203 21505 20892 21291 21222 21428 21016 21353 21164 21381 21108 21124 21031 21495 21139 21481 20837 21489 21180 21434 21056 21205 19963 20740 20384 20856 20288 20684 20327 20890 20501 23976 21016 21306 20912 21540 21005 21517 20903 21259 20948 21479 21096 21557 21072 21350 20837 21422 21042 21574 21082 21536 20866 21319 20951 21482 21040 21672 20979 21520 20965 21376 20896 21333 20935 21545 21006 21512 20919 21454 20827 21280 20995 21472 20989 21478 21013 21512 20791 21442 20962 21527 20881 21422 21049 21587 20933 21392 20857 21504 20987 21392 20919 21406 20860 21431 20976 21482 21064 21388 21013 21344 21081 20715 21012 21364 21022 21445 21047 21478 21072 21578 21003 21514 21142 21452 21047 21452 20903 21325 20842 21421 20999 21289 20961 21393 20941 21395 21078 21365 21024 21417 21036 21448 21220 21468 21201 21603 21283 21611 21141 21544 21089 21440 21188 21367 21018 21235 20974 21223 20883 21170 21033 21255 20839 21231 20949 21213 20951 21266 20948 21201 21046 21251 20909 21168 20971 21163 20945 21243 21011 21163 21004 21267 20987 21125 20940 21239 20919 21230 21210 21308 21111 21125 20876 21157 21076 21333 21128 21011 20976 21197 21307 21281 21460 21351 21460 21218 21440 21298 21508 21371 21441 21261 21306 21099 21277 21227 21174 21137 21132 21109 21258 21349 21348 21371 21425 21367 21443 21333 21493 21202 21376 21095 21478 20881 21207 21027 21319 21149 21412 21211 21508 21315 21553 21360 21504 21194 21383 20975 21217 21057 21353 21184 21533 21264 21600 21301 21581 21249 21485 21165 21239 21041 21339 21165 21470 21252 21552 21272 21559 21073 21288 20903 21280 21009 21591 21177 21632 21197 21664 21092 21489 20907 21400 21024 21554 21148 21730 21170 21720 21012 21545 20851 21346 20996 21606 21210 21637 21179 21629 21127 21591 21120 21330 21015 21475 21093 21545 21174 21628 21171 21531 21146 21505 20916 21449 21057 21634 21084 21604 21032 21504 20932 21528 20905 21415 21060 21610 21170 21472 21016 21476 20936 21368 20875 21380 21033 21609 21078 21600 21047 21605 20961 21521 21244 21520 20973 21568 21128 21611 20932 21540 20948 21484 20871 21492 20979 21507 20996 21687 21157 21544 21047 21461 21064 21432 21029 21420 20957 21516 21200 21521 21080 21531 21084 21517 21084 21433 21049 21408 21006 21443 21131 21539 21062 21586 21056 21531 21083 21447 20962 21412 20992 21453 20962 21530 21269 21578 21156 21552 21082 21411 21078 21417 21076 20794 20937 21328 21084 21440 21223 21588 21368 21568 21152 21381 21192 21432 20971 21308 21018 21175 21074 21521 21267 21671 21377 21568 21193 21344 21100 21248 21013 21303 21152 21314 21150 21521 21487 21644 21443 4888 8075 9861 10248 11035 11195 11789 11930 12368 29184 22868 21209 21421 21335 21453 21169 21213 21185 21191 21352 21157 21207 21021 21194 21166 21088 1207 13419 14931 15677 16123 16565 16704 16817 17007 17213 25557 21884 21437 21331 21135 20789 21044 21125 21047 21340 21200 21399 21285 21391 21228 21397 21272 14467 17440 18247 18269 18533 18541 18912 18801 19173 19119 23009 21606 21622 21388 21540 21234 21577 21155 21553 21013 21352 20948 21428 21165 21580 21185 21643 18216 19856 19696 20089 19767 20128 19735 20197 19840 35054 21668 21717 21231 21750 21176 21644 21095 21589 20998 21644 20889 21405 21026 21505 21145 21703 21209 20730 20672 21067 20594 20963 20288 21069 20439 20861 23479 21671 21071 21748 21066 21744 21038 21525 21045 21492 21025 21537 20925 21591 20955 21549 21218 21595 21125 21558 21028 21607 21035 21511 21086 21391 20926 21591 21059 21712 21095 21668 20970 21559 21024 21540 21060 21482 20987 21540 21081 21377 21081 21593 21164 21643 21165 21472 21184 21494 21051 21447 21058 21365 20908 21536 21152 21672 21255 21585 21123 21501 21124 21531 21049 21481 21133 21421 21046 21587 21191 21680 21152 21558 21113 21593 21108 21491 21056 21704 20899 21495 21072 21587 21295 21639 21191 21511 21224 21418 21143 21404 21195 21437 21009 21440 21299 21687 21353 21646 21370 21525 21154 21585 21190 21364 21248 21401 20999 21438 21312 21699 21465 21818 21303 21575 21160 21398 21200 21280 21158 21584 21058 21268 21068 21536 21409 21782 21596 21699 21364 21506 21240 21312 21024 21185 21211 21484 21013 21376 21334 21625 21564 21481 21209 21376 21515 21485 21624 21380 21507 21244 21648 21263 21313 21211 21386 21301 21472 21539 21465 21447 21561 21504 21591 21336 21429 20726 21349 21223 21255 21306 21504 21446 21532 21415 21594 21399 21604 21412 21491 21244 21472 21149 21371 21121 21340 21175 21527 21340 21638 21367 21575 21472 21581 21408 21637 21293 21560 21153 21725 21092 21512 21017 21458 21248 21602 21391 21607 21413 21670 21368 21665 21201 21609 20870 21559 21037 21508 21051 21548 21252 21644 21310 21708 21307 21735 21255 21809 21253 21711 21143 21664 21648 21592 20999 21557 21029 21472 21221 21592 21287 21735 21373 21783 21269 21812 21271 21744 21221 21627 20739 21779 21120 21589 21041 21620 21165 21677 21319 21651 21330 21659 21187 21637 21127 21607 21161 21567 21120 21524 21111 21568 20931 21677 21062 21600 21191 21728 21241 21761 21072 21720 21001 21624 21072 21645 20960 21671 20951 21463 21075 21601 21140 21666 21200 21638 21295 21714 21263 21655 21190 21527 21248 21561 21193 21555 21211 21512 21176 21510 21154 21513 21073 21461 21109 21525 21224 21689 21188 21732 21225 21691 21225 21603 21130 21531 21204 21561 21159 21544 21136 21602 21051 21618 21190 21542 21120 21468 21060 21536 21181 21716 21370 21635 21347 21688 21399 21668 21504 21717 21279 21561 21239 21537 21202 21625 21294 21592 21205 21549 21168 21395 21280 21358 21415 21687 20964 21451 21117 21431 21289 21516 21207 21552 21332 21589 21380 21756 21489 21840 21634 21856 21530 21675 21399 21500 21236 21401 2831 10639 12420 13741 14461 14793 14812 15132 15153 15210 25120 22032 21575 21385 21386 2601 16361 17139 17856 17812 18194 18227 18397 18393 18587 25638 22103 21658 21512 21453 21285 17882 18859 19336 19637 19676 19772 19837 19673 19474 27574 21970 21792 21494 21579 21210 18853 20069 20562 20277 20454 20428 20773 20459 20660 20183 22044 21593 21826 21264 21524 18567 21066 20883 21088 20770 21399 20939 21203 20788 21277 21935 21735 21177 21840 21434 21726 21304 21495 21257 21743 21313 21738 21061 21613 21432 21736 21269 21543 21303 21845 21293 21668 21173 21708 21339 21783 21086 21773 21185 21830 21328 21678 21111 21723 21382 21827 21201 21609 21181 21803 21334 21709 21050 21610 21392 21717 21306 21520 21224 21794 21376 21731 21127 21671 21329 21874 21200 21579 21058 21719 21158 21860 21227 21733 21156 21602 21290 21709 21065 21677 21131 21751 21300 21654 21282 21618 21192 21749 21175 21761 21101 21709 21216 21770 21146 21640 21116 21647 21200 21745 20995 21580 21112 21649 21298 21703 21176 21553 21220 21638 21307 21657 21283 21632 21129 21824 21295 21650 21154 21728 21257 21689 21150 21574 
39397 35142 41511 33624 39204 36192 39308 34816 41837 34589 39185 35452 38772 34281 39321 35575 39632 33653 41012 38746 40490 36212 41684 34257 41714 33852 39705 36850 39100 33604 40743 34613 39970 34372 40237 33193 40736 34413 39844 33592 42200 34483 40496 37056 38713 33335 42141 34352 38784 33053 32945 41559 40620 36864 40688 43034 42422 34381 33774 34420 34441 40783 40427 36746 41638 41400 41000 35561 41568 43215 35165 41880 39984 35455 42368 41629 42708 35401 41256 33253 34608 42848 40170 33974 34207 41316 40672 35204 41623 42564 40929 43099 40923 33938 34311 42095 42245 34240 32758 40281 33196 34016 33989 40563 34881 42496 42744 41501 34933 33382 41825 43160 32975 38656 33542 38480 33618 38828 34183 39156 33057 38545 33312 38281 33693 38488 33937 36576 42106 35673 42592 36815 40748 36793 42240 37480 41475 37360 42743 36364 41104 38043 41440 37888 42135 36937 32951 35371 42956 37844 43012 37582 32876 35808 33626 38628 33724 38296 43143 38605 33491 37668 41808 37593 41536 38280 42252 38351 32892 37280 41913 36992 41386 37163 41572 36508 41712 37921 41701 37978 41431 38020 41830 38037 18103 23040 28612 24621 32217 27975 27156 28208 34304 35115 43463 40281 37901 32475 33107 41632 34802 42617 35092 31830 35975 33977 36573 33426 36160 34441 36387 33426 37787 33855 35823 33083 35612 32750 34004 32979 34098 32599 34272 33800 36424 37265 36832 37388 34912 35669 31952 35974 35544 37897 36804 38023 35696 34680 34424 35885 37699 37564 36237 35129 34076 37048 37479 39090 34090 36336 36893 39753 33952 37504 37621 37912 34408 38389 37056 35751 35744 39392 34208 38415 35543 37509 34874 39088 35628 38225 37232 39397 33006 39369 35223 37023 35756 40329 32961 40754 35508 37402 35921 39685 33801 40845 33515 39584 36132 37734 34999 40709 33488 39865 36224 37329 35560 40993 34965 40841 36352 38855 34840 41397 33445 39645 35929 38579 34598 39693 34758 38993 35268 39804 33848 40055 34824 39201 32999 41289 33549 39398 34857 39801 33482 39592 35080 38151 33878 39587 35685 37408 34183 39715 36236 39052 34092 38706 37001 38521 34759 39072 35364 38108 33945 39060 36649 38957 36040 39012 34904 40148 32581 38902 35101 40200 34131 38048 35233 39728 37877 37897 34552 38854 36747 40777 36365 36807 34747 38420 37674 40773 35491 38152 34694 26516 31088 28984 31191 29486 30372 37026 37508 34976 34760 42769 41847 39396 33957 38188 38068 39196 35002 33973 41572 35840 38806 36352 37325 35872 37564 34667 34643 31855 36085 35852 38656 37416 37459 37896 37336 36728 36590 35781 34956 32932 37672 36384 37561 35889 40119 37056 38997 36801 38949 37611 37733 35212 38472 34063 36647 32860 38295 33897 37682 35289 38144 36044 39508 37302 40518 36463 40128 35527 40745 36110 41184 35362 40353 34888 40088 33965 39014 33767 38900 33584 37802 33451 37211 33685 38069 33479 37571 32943 38064 32989 38445 33804 39440 34544 39936 34979 38353 33207 39351 34256 39513 33522 39536 33740 40359 35122 39092 33772 38953 33312 40185 33927 39886 32407 39728 34504 39928 33912 39120 39876 39261 34650 40071 38192 39053 36022 41046 33574 38068 34094 38593 35072 38896 35426 39913 35770 40342 35210 41081 35651 39824 36432 40633 35617 40680 36384 41079 36530 40998 36600 40777 36536 38957 35750 38688 36096 39251 36864 39442 36544 38535 33752 37685 35200 37435 36608 38894 36433 37221 34925 38224 33672 37666 35285 38849 36474 39148 39402 42554 40307 32857 39725 40610 37721 40164 39254 39145 40964 39224 40144 37696 32454 37707 35680 36291 30732 32100 33369 36233 37779 46144 38670 40528 38944 37760 40001 36647 39744 37851 39532 37776 39475 38070 38816 38150 37927 36433 38103 36111 39225 33732 36944 35167 38793 35147 39319 36112 40264 37286 40803 37152 40706 37562 40671 37712 41303 36261 40480 34693 40704 39330 39863 35340 39047 34127 38842 34985 39560 35283 40580 36731 42723 36973 41939 36684 41845 35063 42002 35376 39840 34874 39392 35840 40335 34617 40337 35296 41115 36564 41088 36038 41558 35365 40880 35132 41096 35137 40266 34747 39778 35095 40898 34321 39626 36327 41408 35496 40141 35565 39963 34672 41897 37766 41546 36864 41111 37227 41920 35821 40252 35568 39776 36405 40304 35485 39685 35872 41108 34432 39936 34624 38364 35073 39702 36840 41748 38340 42417 39341 42826 39208 41818 38336 41884 37703 41026 38005 40096 36308 39734 36190 39968 35473 38928 34741 38624 34923 38790 36756 37455 34840 39088 35556 38581 36784 39399 39063 37170 36024 38112 40289 39191 41106 40302 40671 39208 41066 40492 40581 39543 40369 40662 40566 38759 39896 37476 38979 37789 40768 38145 39921 38304 39549 34777 37974 36697 38379 37550 38924 36800 40384 36403 38123 37297 36266 34196 38969 37876 41515 39317 32346 39380 34672 39125 42525 37737 42576 37593 42704 37592 41333 36612 40728 35495 40424 34891 39255 34948 38528 36186 41622 37136 42128 38624 42073 35985 41648 36197 42819 37612 41414 36304 42472 36352 42333 35160 40663 36384 40981 36389 40848 36737 41344 38187 39991 36662 43041 35584 41513 36713 41571 36007 42838 33857 41700 37828 41185 36653 41738 36553 42329 35472 40678 37131 40252 37846 41608 36928 40035 37176 32580 36133 42295 35664 42252 36429 41357 36871 41504 35973 41252 35319 41336 36574 42056 36425 40875 35148 40855 36274 40526 35280 41921 37187 41004 35049 41299 36051 40258 36341 40768 38032 40949 39136 39984 40448 40709 37367 40316 37925 32850 37414 40459 38490 39717 40843 41580 37967 40070 36548 32551 36116 39844 42115 39193 37921 42229 38695 40979 40192 39640 38631 37999 41007 40597 40375 36045 42089 39465 40343 41058 41800 36228 40424 40704 39609 38672 41856 40619 38279 40192 42423 38368 35000 40036 41690 37665 39575 40285 42216 37569 41687 40170 32871 36362 40832 40368 42326 37992 41536 39733 41795 39094 39025 38220 43153 39481 42967 36267 42785 40000 42457 38364 40067 37632 34720 41333 36355 40429 34473 41109 36713 32085 38988 37835 41000 36771 33172 37648 33097 36590 40436 37272 42903 38999 33632 38181 41494 36211 42214 38311 33760 38500 33108 35917 41110 37536 42848 38221 34818 37507 32832 37243 41408 36595 41246 37334 33377 37659 32816 36793 42564 36249 40403 37735 42546 38096 42827 38082 32843 35360 42112 37523 33221 36148 42199 38513 33944 36896 41572 36484 32533 37612 41613 37190 42067 36539 42336 37619 42853 38593 41824 38036 41236 38833 35008 37637 41564 38236 42454 38586 42860 38598 33827 37645 32917 39052 42580 38584 42565 37022 41265 36245 42205 37952 40800 37465 41728 37460 41840 38812 41736 37975 42152 38349 42405 40353 42857 40128 34242 40535 34460 39136 33339 38473 42183 39924 41900 38091 40400 37792 40340 36573 39458 38181 40461 36304 40496 37392 40216 37494 40380 37284 39864 38358 40326 37020 39385 37716 39639 37217 40569 37944 39649 37833 40512 37972 39084 37224 40513 37143 40423 40171 41136 39285 39148 36453 39415 38592 41336 39175 37873 37424 40026 41208 40747 42679 41844 42740 40306 42304 40996 32949 41611 42477 40768 41137 39143 40820 40528 39826 39208 39243 39089 40455 41625 41568 42040 42359 42016 42627 41536 43223 40138 41552 39106 42854 36589 40098 38105 41230 39640 42072 40403 32912 40820 33561 41209 32797 39652 41907 37992 40099 38372 41572 39744 33440 40070 34006 40755 34085 40013 43144 39929 40663 38236 41493 39851 42944 40465 33428 40277 33796 38298 40711 36952 40428 37820 34074 39567 34244 39878 34681 38572 42928 37072 41799 37963 33413 39179 35567 39426 35472 37638 33373 36025 41237 37682 34166 39921 34533 39701 34691 39052 34145 38633 41172 38116 42784 39053 33461 39468 34565 39499 33376 39124 32791 36568 42419 38484 34307 38566 34088 37829 32619 36724 32999 36556 42133 38504 34261 39360 42628 38016 42720 37239 41604 36642 41524 38284 34248 38473 33929 38204 34183 37170 32920 40232 32961 37456 33447 38824 34376 36810 33176 36953 42854 36624 42844 37847 32852 37312 35152 39362 33351 38176 42640 38586 42267 38252 42202 37675 32976 39552 33047 38360 33320 38518 33137 38516 42368 38519 41856 38032 42400 39463 33383 38223 33808 37994 33289 38598 42574 37536 41956 37572 42624 37528 33160 40324 33904 39185 33362 38481 42080 38824 42187 38720 35680 37056 40992 38865 42205 40552 33975 41440 33644 39034 41760 39964 42337 37849 41033 38071 39813 38561 33001 40272 35072 41417 33642 39712 41313 39088 40135 37971 41056 39360 41015 39633 33049 42872 34748 42148 29993 33396 31808 25267 33783 35865 32441 33719 27476 42439 37522 40073 42401 41632 42843 39771 40337 39808 40048 41546 39651 40246 38176 39913 39744 38660 21255 28592 34752 33104 37888 31157 32150 33575 36018 38128 45313 37665 42487 41497 39558 35635 38057 39090 38428 41424 39941 42120 40944 42181 40528 42038 40687 30158 29745 38859 39597 31984 31805 35636 34705 38784 38528 38983 34224 34215 41602 33411 40072 33901 39259 33479 37673 41422 37312 42148 39879 33946 39508 34675 38573 35968 34225 38588 35310 38763 34888 39761 35808 35048 34584 35303 40424 35984 39533 34605 38794 34001 37475 34484 36416 42016 38080 32768 39104 35409 39981 35041 33863 38410 33280 37232 40547 38727 42471 36664 43963 35240 38629 35796 38392 35640 38172 33132 38051 42912 38118 33224 36906 34016 37264 33514 39875 34229 38920 33613 37753 34279 38066 33013 38620 42061 37296 34053 38221 35200 38821 34786 37399 33653 37605 33202 38104 42873 38048 33228 38473 41569 38853 34069 39402 34662 39552 42637 39800 43121 38672 42590 38498 41753 36973 33020 39013 34839 40314 33920 38871 43268 39216 33364 38121 42850 39541 42391 38464 33952 39776 34888 39091 33619 38912 34066 38752 43015 38403 35175 36548 43046 38607 33957 40875 34689 39812 33105 39952 42228 39601 42083 40178 42593 37927 42169 41108 35333 41427 34801 41600 33312 39128 33863 39658 41666 40281 42053 37961 42496 41063 35347 42553 36712 41000 34009 39252 41967 39975 40579 39608 33762 38114 40432 38633 33106 41696 36196 33986 35012 41436 32919 40153 40944 37941 39696 40261 43020 38106 41440 41476 34623 33510 42626 40314 41552 33263 42760 34564 41413 33043 40297 34424 40503 41088 40352 41888 41133 42730 33538 42471 42778 33876 32409 33812 41029 42458 35237 41348 40502 40589 41120 32795 42154 33440 41975 34208 41825 34249 41792 43191 40776 42743 39723 41964 39126 41464 39957 33347 41172 34578 41639 34041 42342 34169 41639 34609 40796 33651 39136 35696 38618 32871 37687 42458 40283 34138 41824 34475 41926 35040 41484 34881 39753 34325 36186 33585 38065 32773 38190 33447 40011 34624 40987 35483 40999 35914 40361 36425 40277 35677 39303 34659 34136 33715 37586 33539 37867 42540 40450 34030 40670 35904 41813 36329 40480 36460 40588 35739 40140 34672 34727 35840 38711 33996 37940 34272 39516 35136 41080 34752 41002 34966 39671 34528 39044 34339 39377 33965 38645 33049 38928 33480 36884 35000 38296 33912 39771 35483 40384 35797 38283 35419 37603 34322 38219 34653 37076 34925 37271 42728 38809 34068 39014 34743 39634 34504 40890 35436 40550 34881 39705 33329 39872 33713 39705 33612 40012 32935 39400 32964 39074 33024 38281 42651 39252 33192 39959 35220 39601 35618 40186 35348 40179 34240 38976 33336 39719 33705 39405 33351 38820 34055 38266 34255 39664 33413 38604 42753 38531 33101 39672 35413 41632 34559 41299 35164 41880 34918 32477 35205 40721 33758 40359 33301 39685 34529 40784 34038 39876 33655 39241 41926 40679 41851 42373 35372 37280 42568 39450 42489 41017 33157 39936 33382 40961 34092 41388 36121 42773 36785 34230 36608 33120 34791 41857 43315 40583 42096 28746 29860 27906 32388 29910 33282 33688 37019 37333 38225 40292 38647 33889 41541 41936 26144 39815 37546 34880 34324 38263 38960 40948 40887 32672 35713 39610 34779 32672 42349 40808 35648 35552 40205 33875 34059 35084 36023 34120 31456 46224 38464 36024 42913 34153 39914 35477 38391 32848 40359 42609 42392 35464 42529 34193 39664 38983 34075 36309 40201 33143 32017 38218 36472 38501 35124 41870 37413 39984 35437 40640 38137 35789 39629 36576 42272 35871 40784 43290 40652 36121 40872 35848 38338 34417 42048 35795 40448 33584 40852 36960 40916 34875 39522 35416 41344 36312 38768 36069 39608 36700 40984 35200 39027 35682 41576 36754 39844 34317 39729 36496 41233 35617 38218 34244 41442 35628 40884 32998 39944 36184 41345 35781 39096 35025 41017 37232 39750 34000 38096 35575 39377 36992 40353 35752 39276 34085 40626 35575 38372 35082 39130 36044 40739 34772 40455 34344 39626 35950 39710 35740 38951 35498 39872 35962 39253 34420 38984 34801 39642 35797 37527 33824 38791 34534 40624 35476 39524 33488 39916 34517 40950 34836 40533 34285 38979 36408 40985 34615 39188 35461 40285 35232 39370 33808 
23630 23373 23640 23337 23643 23445 23958 23349 23680 23156 23644 23420 23469 23305 23660 23232 23665 23364 23610 23338 23564 23420 23596 23312 23656 23168 23538 23393 23592 23393 23688 23144 23616 23500 23488 23321 23592 23351 23527 23429 23535 23345 23556 23631 23469 23319 23737 23386 23398 23449 23588 23261 23455 23683 23368 23228 23697 23371 23425 23289 23787 23161 23534 23601 23360 23269 23711 23415 23396 23324 23782 23159 23458 23665 23296 23289 23747 23483 23399 23381 23683 23253 23424 23540 23558 23241 23377 23717 23432 23303 23385 23240 23172 23669 23505 23488 23237 23718 23313 23525 23239 23680 23403 23718 23465 23644 23317 24023 23476 23696 23233 23525 23446 23513 23171 23579 23578 23436 23347 23767 23337 23505 23304 23597 23489 23433 23349 23732 23441 23458 23239 23709 23281 23458 23224 23698 23484 23460 23264 23660 23291 23593 23460 23836 23431 23561 23045 23656 23410 23545 23160 23552 23104 23552 23196 23432 23144 23530 23232 23440 23165 23424 23082 23341 23170 23361 23126 23356 23097 23417 23127 23367 23089 23368 23188 23382 23136 23406 23149 23443 23125 23338 23184 53 12293 15897 17101 18279 18397 18945 19008 19149 19001 32172 26688 25571 24914 24602 24345 24217 23968 24104 23982 24025 23918 23952 23843 23981 23831 23972 23776 23752 23721 23761 23685 23719 23494 23526 23346 23442 23513 22996 23346 23503 23608 23576 23671 23483 23664 23330 23472 23456 23656 23441 23689 23502 23559 23237 23365 23374 23684 23440 23579 23282 23257 23445 23692 23335 23451 23303 23736 23366 23491 23278 23690 23329 23282 23477 23599 23138 23623 23419 23541 23245 23684 23050 23616 23360 23470 23250 23686 23255 23539 23315 23606 23323 23756 23167 23744 23302 23660 23177 23738 23024 23712 23261 23453 23297 23654 23092 23729 23216 23591 23304 23599 23175 23713 23187 23854 23324 23627 23058 23567 23303 23561 23201 23601 23169 23545 23321 23524 23165 23632 23177 23562 23150 23673 23080 23608 23136 23570 23056 23581 23074 23535 23032 23566 23152 23522 23161 23575 23127 23491 23218 23515 23098 23480 23187 23592 23057 23399 23268 23552 23152 23439 23195 23632 23104 23401 23175 23442 23229 23383 23153 23485 23338 23347 23297 23416 23395 23527 23130 23349 23253 23398 23448 23341 23296 23385 23312 23649 23414 23226 23223 23345 15081 19224 19547 19717 20140 20135 20264 20533 20729 20821 26991 25573 24670 24514 24374 24452 24247 24082 23751 23537 23987 23988 24029 23787 24056 23641 23709 23392 24191 23637 23851 23752 23798 23623 23783 23636 23816 23490 23555 23309 23645 23298 23632 23479 23837 23512 23836 23500 23739 23528 23729 23428 23661 23319 23664 23166 23512 23090 23543 23363 23594 23324 23619 23458 23760 23414 23824 23434 23804 23341 23791 23366 23815 23285 23746 23269 23652 23201 23589 23191 23533 23137 23463 23146 23449 23141 23446 23083 23487 23271 23488 23076 23676 23180 23585 23207 23573 23157 23553 23209 23575 23199 23533 23120 23468 23209 23568 23154 23591 23090 23552 23073 23564 23088 23545 23187 23556 23693 23976 23087 23415 23100 23566 23100 23479 23132 23347 23184 23435 23258 23424 23226 23466 23256 23488 23318 23553 23389 23561 23344 23639 23402 23553 23324 23495 23323 23514 23293 23560 23367 23452 23390 23495 23353 23464 23287 23485 23297 23488 23253 23376 23265 23333 23361 23119 23432 23212 23107 23322 23100 23337 23309 23340 23319 23389 23383 23405 23462 23591 23556 23650 23629 23602 23499 23447 23677 23449 23651 23392 23665 23363 6561 19497 20530 20855 21135 20946 21240 21182 21453 21349 27625 25100 24677 24172 24285 23912 24199 23767 24052 23768 23917 23709 23887 23600 23763 23458 23683 23479 23760 23365 23483 23232 23639 23332 23753 23363 23737 23411 23855 23431 23813 23435 23828 23420 23812 23360 23744 23244 23680 22488 23835 23250 23562 23131 23526 23191 23537 23246 23660 23413 23788 23339 23808 23367 23756 23377 23759 23255 23639 23168 23548 23183 23357 23235 23538 23179 23671 23260 23636 23264 23687 23222 23653 23159 23635 23192 23610 23176 23500 23176 23569 23160 23507 23226 23827 23239 23442 23154 23436 23239 23557 23301 23581 23315 23645 23330 23554 23296 23431 23264 23462 23278 23556 23189 23511 23177 23541 23052 23433 23220 23328 23262 23441 23338 23465 23473 23598 23593 23591 23517 23452 23456 23420 23339 23424 23371 23355 23307 23370 23264 23336 23210 23288 23209 23254 23276 23287 23424 23518 23145 23307 23237 23197 23265 23328 23300 23527 23303 23318 23602 23376 23559 23304 23631 23332 23602 23399 23573 23441 23626 23392 23501 23352 23489 23255 23479 23541 23471 23360 23308 23168 23357 23073 23343 23127 23352 23192 23335 23142 23481 23165 23575 19782 21476 21393 21894 21726 22056 21804 22181 21938 36482 24633 24401 23771 24064 23612 23966 23485 23842 23346 23778 23287 23664 23200 23611 23135 23494 23304 23661 23319 23718 23416 23698 23303 23589 22977 23660 23403 23721 23133 23834 23106 23673 23198 23217 23104 23726 23127 23537 23303 23564 23202 23601 23224 23493 23253 23544 23116 23589 23125 23563 23153 23612 23121 23537 23205 23613 23187 23505 23328 23477 23223 23449 23255 23488 23209 23528 23098 23546 23137 23504 23232 23443 23239 23418 23399 23447 23336 23415 23257 23271 23264 23857 23344 23431 23321 23985 23381 23466 23453 23380 23459 23337 23511 23394 23478 23352 23436 23308 23325 23219 23259 23385 23309 23552 23209 23616 23186 23397 23367 23241 23602 23378 23254 23454 23255 23580 23152 23335 23565 23255 23287 23509 23193 23407 23293 23239 23427 23325 23120 23331 23252 23347 23590 23155 23453 23356 23538 23193 23568 23275 23374 23368 23548 23189 23471 23405 23440 23141 23599 23340 23405 23191 23577 23339 23267 23259 23611 23248 23395 23232 23719 23253 23408 23175 23624 23239 23367 22607 23576 23345 23489 23029 23546 23285 23674 23173 23533 23177 23652 23304 23464 18745 22330 22358 22777 22417 22704 22240 22756 22534 22893 24243 23864 23171 23765 23332 23793 23268 23662 23062 23552 23304 23718 23300 23575 23160 23407 23170 23676 23341 23648 23210 23504 23047 23564 23222 23785 23180 23648 23183 23565 23129 23516 23076 23572 23141 23626 23271 23510 22989 23428 23114 23496 23193 23492 23301 23628 23124 23444 22876 23526 23022 23492 23203 23605 23179 23567 23054 23404 23125 23448 23097 23440 23149 23468 23164 23536 23257 23560 23237 23461 23148 23499 23537 23406 23236 23460 23241 23476 23207 23473 23237 23553 23319 23510 23330 23465 23265 23462 23079 23349 23154 23393 23126 23426 23141 23449 23189 23454 23302 23435 23194 23472 23289 23501 23377 23533 23414 23611 23504 23474 23348 23569 23436 23482 23309 23385 23225 23289 23154 23287 23211 23205 23104 23336 23363 23367 23145 23277 23096 23223 23232 23195 23140 23296 23168 23208 23136 23348 23043 23249 23256 23272 23063 23223 23211 23283 23116 23713 23248 23165 23178 23177 23195 23218 23186 23329 23377 23370 23248 23116 23383 23255 23636 23360 23599 23315 23581 23337 23643 23416 23640 23344 23438 23175 23385 23244 23352 23185 23237 23131 23408 23241 23457 23368 23493 23380 23547 23404 23584 23260 23532 23171 23667 23014 23333 23077 23496 23175 23591 23265 23651 23343 23604 23381 23569 23280 23474 23534 23378 23079 23441 23216 23560 23261 23636 23431 23629 23297 23527 23178 23478 23084 23413 23181 23528 23300 23599 23320 23591 23189 23458 23099 23296 23056 23553 23236 23669 23280 23675 23161 23552 23136 23392 23029 23637 23140 23722 23237 23709 23176 23538 23014 23392 23049 23605 23205 23655 23179 23639 23255 23484 23158 23428 23015 23412 23192 23574 23258 23607 23339 23584 23131 23428 22976 23403 23097 23648 23141 23629 23111 23552 23072 23445 23080 23509 23089 23509 23270 23511 23116 23472 23112 23380 23545 23347 23136 23527 23149 23601 23189 23567 23060 23462 23064 23481 23087 23515 23136 23586 23085 23467 23029 23471 23051 23435 23107 23486 23069 23613 23232 23529 23141 23461 23169 23347 22791 23352 23088 23493 23217 23498 23269 23415 23148 23473 23182 23380 23050 23392 23079 23432 23269 23511 23276 23454 23130 23493 23216 23453 23169 23861 23308 23337 23123 23532 23246 23496 23284 23467 23272 23437 23173 23424 23151 23290 23028 23400 23147 23290 23260 23564 23488 23448 23333 23437 23313 23447 23163 23328 23559 23351 23111 23385 23348 23563 23498 23595 23345 23325 23241 23280 23141 23204 23255 23221 23252 23418 23433 23624 23513 3677 15453 17253 17400 17789 17968 18141 18248 18509 18375 30430 26956 25831 25356 25184 24938 24664 24582 24294 24472 24113 24338 24001 24156 24140 23869 23623 15285 18789 19663 19893 20296 20282 20533 20457 20712 20551 27892 25737 25225 24661 24672 24186 24217 24010 24266 23997 24302 23959 24233 23920 24141 23897 24155 18921 20665 20743 21341 21029 21417 21259 21621 21505 34001 25696 25102 24529 24579 24119 24285 23921 24137 23648 23969 23532 24032 23657 24118 23716 24091 23767 21302 21591 22103 21818 22345 21760 22195 21925 22416 26965 24961 24123 24409 23858 24220 23634 24037 23518 23511 23372 23817 23480 23836 23543 23979 23631 19649 22297 22942 22607 22965 22589 23024 22545 22816 22516 24752 23714 24143 23570 24031 23405 23914 23436 23777 23354 23824 23373 23791 23320 23767 23541 23815 23455 23762 23400 23744 23388 23685 23367 23657 23326 23696 23401 23817 23364 23900 23259 23788 23344 23648 23399 23617 23315 23507 23351 23529 23353 23692 23370 23767 23447 23639 23366 23649 23375 23561 23342 24065 23226 23566 23355 23709 23488 23673 23417 23606 23352 23643 23281 23544 23253 23492 23325 23667 23420 23773 23386 23627 23368 23616 23416 23548 23281 23716 23216 23542 23296 23560 23497 23693 23420 23649 23426 23577 23401 23432 23322 23405 23215 23460 23424 23664 23584 23646 23639 23602 23382 23518 23354 23447 23342 23522 23364 23416 23447 23660 23653 23816 23530 23583 23320 23507 23288 23424 23235 23509 23264 23440 23229 23435 23586 23693 23624 23761 23625 23630 23390 23394 23286 23297 23321 23522 23281 23339 23473 23669 23591 23485 23577 23497 23570 23411 23758 23467 23637 23224 23595 23131 23376 23169 23501 23311 23640 23543 23644 23461 23591 23511 23695 23381 23547 23353 23593 23143 23346 23301 23540 23489 23621 23360 23677 23429 23691 23373 23627 23261 23525 23198 23384 23122 23440 23308 23515 23341 23653 23369 23686 23444 23642 23408 23684 23308 23657 23161 24032 23055 23437 23066 23466 23223 23623 23367 23673 23381 23751 23368 23692 23273 23597 23560 23652 23089 23524 23142 23542 23197 23674 23319 23709 23340 23778 23287 23778 23303 23735 23185 23623 23179 23451 23160 23479 23057 23431 23216 23568 23274 23664 23384 23681 23380 23683 23360 23687 23252 23629 23131 23521 22983 23503 23072 23552 23192 23675 23255 23685 23221 23645 23210 23540 23234 23540 23264 23444 23200 23495 23096 23553 23351 23469 23175 23575 23264 23558 23313 23677 23229 23608 23076 23660 23076 23580 23098 23537 22774 23638 23104 23478 23170 23606 23254 23564 23332 23556 23324 23559 23298 23481 23255 23511 23233 23447 23271 23390 23146 23489 23281 23299 23170 23437 23131 23460 23287 23612 23301 23567 23326 23645 23258 23449 23239 23488 23315 23434 23256 23431 23225 23458 23209 23473 22955 23428 23176 23308 23129 23440 23336 23547 23341 23609 23391 23571 23485 23591 23488 23516 23411 23488 23335 23409 23300 23389 23287 23463 23304 23407 23221 23365 23200 23253 23270 23377 23125 23285 23045 23344 23276 23424 23288 23457 23369 23465 23488 23552 23532 23645 23619 23668 23575 23613 23424 23405 23252 23396 23270 11574 15405 16969 17061 17728 17710 17930 18055 18074 42386 28260 26252 25350 25182 24743 16218 18945 19960 19857 20326 20307 20520 20439 20743 20502 28265 25858 25383 24900 24651 13853 20260 21351 21432 21444 21712 21577 21661 21456 21508 27125 25559 24801 24804 24180 24493 20967 22181 21997 22401 21875 22434 22161 22522 22073 27696 24651 24724 24138 24245 23688 22381 22672 23118 22584 23085 22850 23248 22564 22813 22848 24583 23861 23933 23729 24104 23746 23991 23448 23973 23613 24071 23528 23830 23571 24025 23678 23789 23537 23971 23584 23965 23436 23974 23469 24032 23467 23783 23399 23946 23494 23941 23255 23959 23423 23965 23493 23760 23337 23785 23593 23830 23367 23592 23433 23852 23501 23735 23218 23766 23488 23870 23409 23629 23435 23938 23372 23752 23273 23663 23288 23784 23449 23676 23488 23630 23329 23740 23351 23575 23262 23735 23410 23744 23346 23589 23348 23621 23376 23746 23212 23697 23294 23745 23399 23620 22643 23575 23274 23747 23318 23585 23205 23657 23324 23732 23326 23554 23288 23616 23312 23704 23248 23620 23279 23607 23461 23600 23135 23605 23311 23752 23397 23571 23289 
23419 23828 23007 23604 23381 23557 23218 23687 23205 23441 23339 23730 23055 23794 23199 23467 23174 23775 22962 23644 23338 23473 23157 23752 23153 23328 23242 23618 22899 23788 23180 23411 23175 23692 22810 23809 23193 23497 23136 23934 22933 23604 23168 23651 22957 23829 23084 23452 22954 23812 22951 23974 23088 23698 22763 23843 23184 23402 23001 23665 23155 23475 23180 23671 22913 23596 23132 23459 22967 23750 23047 23359 23161 23727 22803 23714 22951 23565 22741 23561 23020 23497 22865 23603 23003 23439 22916 23741 22837 23546 22852 23652 23063 23626 23002 23584 22831 23574 22840 23552 22806 23604 22796 23692 22823 23698 22829 23548 22891 23665 22801 23376 22936 23683 22890 23589 22959 23542 23074 23418 23080 23419 22900 23515 22988 23429 22894 23423 23061 23403 22852 23489 23133 23302 22855 23408 23007 23292 23042 23381 23026 23457 22862 23467 22928 23404 22930 23369 22958 23620 22701 23335 23073 23515 22904 23352 22952 23545 22748 23317 22940 23642 22862 23591 23031 23495 23040 23182 22926 23568 23128 23014 22904 23250 23304 23320 22695 23232 23184 23463 22743 23130 23075 23641 22849 22933 87 1255 4608 5623 7700 7974 9360 43661 43669 38336 34973 31555 30388 28361 27968 26717 26647 25627 25879 25028 25216 24503 24936 24214 24625 23959 24489 23694 24259 23623 24124 23386 23971 23264 23816 23431 23876 23232 23815 23288 23855 23338 23904 23160 23744 22925 23730 23020 23824 23168 23866 22961 23458 22850 23722 23091 23707 22945 23888 22964 23552 23150 23541 23045 23610 23090 23408 22966 23639 23169 23969 23002 23628 22900 23586 23097 23457 23043 23613 22885 23453 23123 23446 22994 23541 23061 23378 23045 23440 23088 23543 23265 23424 23145 23566 22994 23638 23058 23180 23488 23258 22979 23829 22945 23369 23345 23068 23233 23380 23043 23373 23159 23197 23177 23617 22947 23404 23400 23236 23122 23687 22896 23253 23516 23096 23601 23258 23232 23301 23600 23010 23440 23345 23452 23424 23543 23317 23156 23296 23585 23223 23273 23412 23507 23089 23523 23416 23644 23048 23575 23217 23667 23222 23258 23399 23491 23159 23349 23277 23713 23126 23402 23016 23770 23239 23573 22946 23656 23322 23748 22870 23575 23188 23738 23033 23428 22956 23828 23172 23729 22869 23779 23032 23869 23194 23683 22892 23552 23257 105 3203 7983 9831 12154 12705 14441 14357 15687 43638 43680 37912 34257 30992 29925 28035 27925 26423 26492 25230 25775 24935 25235 24634 25152 24408 24838 24032 24723 23760 24512 23750 24510 23623 24395 23750 24330 23655 24173 23515 23866 23735 24070 23480 23980 23372 23939 23413 23972 23480 24029 23489 23988 23393 23736 23291 23751 23213 23748 23054 23736 23232 23757 23281 23826 23385 23733 23433 23831 23458 23871 23616 23903 23607 23767 23529 23701 23365 23568 23250 23587 23372 23501 23180 23408 23159 23341 23213 23369 23107 23387 23159 23515 23645 22985 23281 23424 23159 23440 23232 23379 23125 23424 23475 23424 23700 23398 23669 23388 23694 23315 23491 23301 23470 23361 23450 23119 23256 23334 23588 23319 23463 23271 23531 23302 23437 23012 23396 23040 23456 23158 23457 23232 23460 23154 23620 23208 23700 23200 23698 23319 23700 23310 23856 23239 23846 23384 23793 23331 23792 23383 23841 23222 23853 23152 23863 23252 23837 23127 23814 23082 23690 23542 23428 23228 23508 23055 23400 22986 23533 22880 23676 22895 23571 23047 23632 23089 23808 23151 23824 23099 23772 23100 23707 23001 23613 23177 23600 23086 23497 23013 125 6417 10727 13181 15403 15631 17356 17217 18359 18121 42441 34960 31687 28936 28092 26564 26432 25439 25480 24741 25129 24359 24587 24067 24479 23965 24283 23699 24151 23555 24128 23464 24151 23580 24149 23627 24072 23601 24023 23672 23907 23545 23857 23445 23796 23386 23605 23276 23540 23563 23637 23301 23516 23225 23680 23328 23716 23617 23901 23781 23897 23630 23747 23522 23690 23278 23589 23270 23548 23124 23473 23319 23477 23144 23333 23277 23256 23506 23289 23641 23415 23796 23479 23710 23521 23646 23477 23637 23575 23623 23328 23485 23268 23736 23259 23481 23168 23303 23155 23533 23159 23577 23164 23722 23394 23783 23320 23793 23335 23790 23232 23812 23171 23687 23104 23652 22905 23624 23064 23507 23005 23577 23072 23712 23176 23732 23120 23824 23177 23804 23168 23840 23168 23833 23278 23788 23278 23788 23264 23776 23264 23723 23211 23659 23063 23712 23160 23463 22983 23563 22953 23517 22871 23639 22963 23736 23123 23680 23204 23589 23205 23643 23001 23656 22823 23719 22849 23764 22925 23719 22953 23524 22921 23540 22999 23607 22924 23494 22907 23496 22972 23385 22963 23457 22930 23492 23100 23577 22976 23608 23095 23629 9683 14460 16242 17971 18192 19371 19153 20072 19869 38661 32077 29368 27196 26434 25529 25427 24727 24917 24439 24597 24128 24117 23667 23914 23561 23713 23536 23719 23394 23733 23433 24067 23761 23623 23296 23446 23531 23992 23332 23719 23331 23931 23344 23413 23299 23957 23170 23443 23721 23153 23884 23354 23639 23500 23619 23256 23728 23226 23539 23556 23335 23353 23609 23133 23637 23405 23507 23459 23538 23269 23673 23048 23737 23143 23591 23277 23537 23365 23249 23322 23356 23415 23553 23392 23537 23146 23650 23205 23691 23201 23756 23106 23607 23171 23671 23133 23719 23120 23648 23047 23677 23082 23733 23143 23699 23012 23751 22920 23859 22885 23861 22809 23900 23003 23633 23175 23560 23249 23559 23153 23744 23232 23713 22944 23718 23017 23527 23175 23693 23088 23621 22988 23581 22885 23573 22897 23671 22897 23552 22965 23524 23040 23565 23159 23525 22932 23574 22788 23630 22951 23524 22862 23802 22740 23581 22912 23745 22850 23635 23139 23463 22952 23511 23014 23442 22942 23453 23176 23526 22857 23493 23217 23432 22966 23609 23146 23442 22884 23643 23059 23598 22855 23469 22949 23695 23003 23504 22841 23488 23220 23437 14269 17788 19154 20434 20452 20786 20724 21362 21211 21872 28647 26427 24942 24823 24200 24455 23980 24066 23493 23709 23497 23787 23680 23968 23276 23419 23213 23556 23341 23974 23480 23527 23002 23365 23157 23521 23408 23821 23508 23341 23189 23318 23129 23526 23424 23812 23587 23393 23143 23495 23634 23464 23589 23344 23555 23219 23394 22992 23582 23271 23660 23439 23552 23365 23529 23233 23249 23099 23347 23174 23409 23318 23525 23335 23570 23336 23468 23171 23410 23072 23168 23173 23317 23124 23495 23188 23683 23307 23719 23339 23557 23290 23580 23245 23525 23056 23464 22948 23334 22881 23485 23092 23645 23005 23575 23070 23639 23178 23700 23244 23708 23201 23760 23111 23695 23213 23687 23186 23712 23043 23600 22976 23644 22984 23545 22956 23548 22862 23489 22813 23485 22755 23393 22804 23685 22707 23908 23040 23499 23062 23453 22983 23630 22987 23656 22940 23609 23020 23632 23010 23651 22887 23662 22816 23642 22835 23329 23015 23507 22983 23499 22896 23376 22913 23447 22939 23604 23026 23574 23105 23537 23245 23536 23058 23553 22963 23499 22947 23533 23020 23517 22885 23451 22827 23442 22594 23520 22743 23437 22888 23645 22977 23693 23022 23680 22857 23569 22927 23464 22933 23373 22879 23309 22779 23497 22905 23545 23054 23534 23093 23587 22985 23565 22983 23416 22996 23473 22902 23396 22912 23505 23045 23680 23082 23478 23017 23531 22914 23469 23304 23319 22867 23463 23068 23591 23098 23557 22993 23478 22904 23335 22856 23207 23047 23522 23226 23521 23063 23414 22949 23355 23024 23247 23068 23527 23301 23602 23104 23386 22917 23188 23081 23241 23221 23555 23355 23569 23140 23360 22948 23208 22939 23179 23066 23594 23469 23574 23063 23344 23009 23223 23139 23265 22918 23238 23255 23688 23384 23593 23174 23297 22950 23152 23052 23223 23079 23490 23354 23431 23328 23554 23515 23149 23231 22969 23264 23051 23432 23300 23518 23262 23441 23200 23275 22926 23137 23087 23272 23369 23416 23329 23484 23230 23336 23265 23203 23014 23173 23241 23441 23264 23536 23289 23520 23079 23360 22880 23407 22993 23445 23185 23507 23263 23538 23225 23460 23190 23341 22927 23303 23012 23468 23104 23589 23081 23702 23127 23624 22944 23437 22969 23324 22951 23422 23096 23527 23182 23661 23230 23680 23247 23691 23082 23540 23087 23557 22779 23439 22853 23561 22980 23712 23050 23795 23057 23712 23016 23678 22876 23667 22701 23328 22909 23521 23104 23690 23073 23680 23153 23712 23059 23549 23308 23537 22684 23400 22850 23677 23010 23612 110 93 87 4355 5850 8018 8483 10071 9912 11221 43664 43682 40311 36360 32793 31430 29395 28748 27393 27383 26361 26445 25504 25870 24912 25536 24563 97 2597 8117 10236 12693 13031 14528 14587 15804 43623 43683 39186 35131 31648 30066 28320 28066 26848 26963 26128 26321 25487 25827 24966 25262 24723 25094 3720 10048 12554 14968 15835 17297 17494 18547 18416 43659 37525 33349 30027 28884 27273 27025 25943 26224 25127 25448 24725 25267 24762 25076 24422 24769 6168 11881 14941 17062 18393 18887 18842 19761 19861 20615 36633 31755 28728 27595 26285 26048 25225 25396 24720 24872 24242 24590 24362 24663 24544 24805 24297 15430 17921 19781 20136 20877 20695 21437 21173 21621 21557 29376 27094 26408 25462 25125 24640 24603 24256 24280 23991 24230 23771 23976 23744 24143 24050 24361 24140 24289 24123 23895 24016 23714 23941 23459 23793 23488 23789 23611 23943 23721 23993 23701 23881 23763 23773 23723 23642 23375 23511 23298 23616 23424 23759 23575 23889 23509 23929 23608 23851 23377 23754 23221 23549 23155 23772 23244 23832 23400 23893 23464 23856 23414 23746 23267 23559 23139 23426 23325 23757 23332 23831 23436 23783 23447 23826 23221 23709 23255 23452 23093 23638 23271 23812 23302 23848 23323 23831 23296 23703 23120 23784 22949 23577 23063 23606 23202 23885 23205 23904 23228 23943 23176 23836 23099 23801 22852 23527 22895 23608 23130 23671 23236 23743 23216 23853 23327 23783 23093 23639 23156 23602 22861 23491 22995 23762 22999 23941 22996 23879 22952 23671 22858 23712 22836 23616 22912 23531 23020 23661 23082 23819 23024 23725 23078 23479 23140 23436 23088 23425 22992 23437 22791 23581 22816 23766 23003 23731 23060 23575 23005 23582 22849 23639 22855 23505 22670 23424 22916 23608 23014 23622 23057 23650 22939 23536 23053 23447 23079 23441 22984 23417 22945 23424 22887 23591 22976 23620 23098 23686 23072 23468 22997 23519 22929 23520 22903 23489 22939 23506 22856 23559 22861 23491 22997 23573 23015 23595 23040 23534 23041 23395 22986 23291 23043 23360 22841 23262 23002 23456 23150 23564 23325 23644 23196 23445 23136 23434 23085 23341 23058 23320 22775 23216 22871 23116 22977 23259 23239 23541 23377 23660 23376 23536 23216 23296 22989 23328 22874 23137 23159 23290 23021 23184 22891 23435 23142 23574 23349 23658 23472 23685 23243 23364 23047 23366 23079 23239 23020 23451 23495 23613 23350 23003 23187 22972 23412 23034 23500 23253 23528 23237 23533 23235 23495 23300 23319 23188 23440 23116 23083 23003 23243 23097 23335 23159 23440 23203 23499 23235 23593 23218 23576 23261 23545 23195 23468 23054 23325 23238 23260 23020 23273 22750 23235 23047 23312 23113 23562 23092 23642 23168 23459 23302 23553 23149 23652 23120 23598 23117 23492 22940 23567 23040 23555 22912 23220 22797 23359 22914 23334 22997 23555 22907 23566 23045 23592 23063 23700 23043 23648 23069 23683 23040 23719 23105 23603 22981 23625 22946 23576 22902 23461 23033 23481 22871 23239 22819 23250 22742 23499 22864 23428 22908 23351 22912 23457 22905 23607 22966 23696 22913 23792 22839 23730 22849 23461 22883 23367 93 87 1265 4541 5827 7661 8259 9616 9683 43649 43552 43856 37648 34469 31519 119 5845 10402 11713 13931 14291 15541 15504 16440 43604 43684 40628 36272 32577 31077 3285 10646 13346 16163 16817 18253 18176 19278 18791 19653 42544 36355 32289 30704 28812 10784 13523 17075 18121 19681 19544 20371 20248 20878 20588 37700 32066 30045 28160 27637 26272 18909 20233 21535 21282 22083 21760 22496 21781 22452 31173 29077 26939 26537 25529 25800 25216 25485 24619 25028 24576 24974 24490 24659 24247 24666 24455 24334 23813 24375 24067 24590 23881 24193 23808 24186 24144 24052 24103 24066 23858 24281 23722 23966 23377 23963 24012 23966 23722 23709 23522 24220 23654 23765 23425 23736 23818 23859 23266 23627 23484 24029 23749 23552 23356 23734 23796 23898 23350 23488 23441 23749 23714 23542 23323 23584 23515 23960 23319 23479 23232 23617 23606 23405 23366 23350 23874 23497 23744 23353 23402 23455 23828 23477 23630 23082 23681 23536 23625 23472 23386 23105 23529 23601 23592 23415 23287 23216 23595 23402 23628 23296 23312 23371 23580 23376 23767 23081 23623 23325 23727 23445 23547 23105 23504 
