# Supplementary material for: An Active Feature Selection Strategy for DWT in Artificial Taste
Source: Hindawi journal article supplement (doi:10.1155/2018/9709505), 2018-01-01
Supplement: f1 [file 9709505.f1.zip › redWine-med-2.txt]

43447 43456 43456 43446 56 6366 17708 20120 21900 22135 22921 22790 23608 23036 24045 23227 24113 23373 24028 23560 24186 23580 24349 22885 24304 23754 24359 23815 24391 23695 24366 23817 24529 23740 24349 23933 24327 24064 24621 23936 24356 23971 24503 23707 24437 23995 24391 23955 24359 23968 24578 24036 24392 24038 24423 23913 24424 23956 24515 23845 24380 24117 24353 23984 24604 23767 24457 23975 24365 24085 24337 24032 24500 23865 24346 24133 24384 24108 24592 23991 24355 24311 24202 24068 24524 23897 24357 24342 24264 24038 24316 24289 24362 24156 24720 23890 24207 24429 24279 24072 24363 24482 24176 24003 24628 24151 24215 24197 24649 24055 24128 24170 24651 24176 24238 24433 24348 24005 24346 24460 24157 24026 24384 24421 24272 24096 24362 24355 24221 24085 24565 24304 24352 24106 24659 24245 24034 24596 24324 24269 24038 24620 24188 24498 24004 24695 24168 24392 23993 24635 24249 24412 24114 24544 24295 24339 24064 24458 24261 24561 24007 24464 24332 24588 24115 24330 24151 24684 24205 24469 24076 24704 24217 24519 24051 24582 24233 24696 24177 24462 24042 24640 24241 24576 3771 18828 20800 22247 21744 22500 21884 22387 22144 23017 32689 27595 25351 25556 24800 25282 24421 24842 24265 24928 24343 24930 24272 24633 24103 24885 24248 24890 24176 24658 23932 24792 24216 24865 24229 24652 23896 24777 24192 24854 24113 24734 23835 24725 24256 24777 24131 24690 23879 24756 24153 24792 24216 24672 24006 24470 24071 24872 24119 24792 23965 24487 23963 24823 23943 24793 24001 24569 23984 24538 23988 24789 24058 24584 23875 24584 24023 24720 23971 24563 23961 24476 24116 24696 23996 24576 23894 24535 24081 24782 23895 24737 23802 24614 24064 24621 23968 24427 23874 24633 23943 24730 23902 24552 23976 24576 24124 24528 24025 24566 23993 24473 24206 24597 23978 24491 24073 24592 24157 24568 23936 24349 24145 24524 24234 24480 23883 24520 23992 24503 24200 24488 24159 24551 24151 24535 24116 24514 24001 24367 24192 24529 24013 24364 24099 24376 24364 24615 24036 24294 24173 24464 24288 24581 24015 24234 24098 24505 24462 24498 24056 24241 24183 24368 24400 24679 23988 24089 24175 24298 24497 24345 24173 24202 24156 24536 24497 24187 24400 24236 24273 24599 24349 24201 24136 24334 24368 24576 24261 24356 24085 24344 19910 22318 22359 22331 23151 22989 23312 22940 23258 36632 27230 25324 25334 24433 24716 24576 24820 24464 24629 24269 24680 24472 24626 24430 24440 24183 24567 24466 24635 24314 24491 24001 24678 24330 24807 24253 24565 23965 24632 24256 24784 24231 24441 24006 24600 24309 24701 24292 24429 24041 24629 24238 24731 24118 24449 24356 24696 24206 24747 23989 24453 24055 24807 24153 24657 23844 24690 24153 24805 24008 24551 23713 24813 24064 24787 23830 24724 24071 24808 23997 24524 23994 24802 24077 24596 23923 24640 24231 24693 23920 24688 24201 24668 24160 24448 23970 24834 24103 24653 23846 24832 23879 24840 23809 24590 23988 24745 23785 24528 23954 24766 23908 24534 24048 24648 23914 24467 24044 24694 23828 24536 24051 24628 24042 24605 23985 24615 23936 24552 24056 24569 23936 24576 24060 24605 23872 24652 23861 24506 24000 24557 24028 24450 24044 24507 23952 24474 24215 24576 24018 24580 23996 24373 24042 24458 23990 24487 24103 24508 24108 24389 24040 24568 23894 24549 24460 24620 24067 24480 23899 24580 23958 24581 24038 24500 24128 24325 24328 24327 24240 24401 24064 24503 24099 24264 24340 24438 23986 24548 24166 24267 18081 22556 22795 23143 23217 23730 23248 23504 23482 23781 26744 25190 24761 24849 24449 24565 24225 24854 24391 24268 24152 24608 24417 24291 24091 24740 24288 24238 24263 24610 24272 24146 24350 24610 24152 24120 24606 24353 24592 24074 24455 24264 24405 24321 24551 23980 24565 24242 24519 24090 24698 24622 24487 24340 24456 24220 24649 23970 24567 24231 24372 24277 24499 24167 24616 24045 24548 24173 24480 24279 24439 24196 24660 23952 24748 24064 24688 24112 24455 24245 24345 24237 24512 24133 24592 24080 24636 23991 24741 23949 24704 24044 24534 24148 24608 24136 24502 24243 24357 24156 24604 24120 24434 24176 24576 24096 24649 24024 24657 24010 24698 23848 24835 23924 24732 23962 24716 23798 24822 23813 24827 23840 24804 23847 24771 23865 24776 23798 24872 23858 24807 23924 24714 24004 24593 24084 24592 24064 24663 24128 24406 24144 24340 24192 24458 24120 24589 24108 24658 24040 24707 23812 24863 23762 24837 23876 24756 24003 24716 23856 24655 23892 24674 23792 24766 23650 24628 23856 24557 24088 24516 24048 24905 24005 24537 23975 24640 23880 24608 23832 24544 24032 24412 24071 24448 23939 24590 23865 24690 23714 24612 23819 22988 23108 23753 23328 23819 23376 24083 23456 24076 27590 25181 24337 24637 24218 24467 24237 24647 24112 24569 23946 24552 24139 24183 24148 24448 24131 24629 23916 24568 24046 24480 24198 24352 23982 24458 23960 24506 23965 24468 24115 24395 24046 24442 24026 24521 23458 24456 24001 24363 24161 24428 24130 24391 24032 24365 24027 24376 24207 24359 24231 24320 24082 24564 24556 24432 24020 24339 24402 24247 24134 24332 24180 24507 23971 24249 24327 24277 24393 24213 24088 24675 23974 24439 24178 24228 24486 24231 24156 24508 24042 24544 24073 24328 24502 24274 24315 24308 24020 24553 24048 24301 24407 24086 24455 24243 24169 24557 24017 24448 24180 24164 24534 24343 24176 24371 24081 24420 24081 24361 24431 24531 24564 24071 24504 24149 24341 24135 24534 23824 24504 24046 24394 24221 24181 24320 24497 24133 24562 23988 24536 24272 24369 24388 24509 24426 24616 23976 24516 24173 24250 24165 24534 24029 24608 23897 24604 24088 24304 24211 24507 23970 24689 23948 24565 24183 24384 24224 24612 24104 24756 23974 24541 24146 24415 24135 24640 23773 24720 24028 24455 24128 24498 24016 24685 23811 24706 24087 24404 24183 24688 24021 23186 23543 23925 23764 24213 23694 24396 23540 24446 23759 25004 24270 24725 24007 24842 23953 24634 24136 24608 23924 24777 23870 24628 24098 24464 24080 24706 23855 24670 24028 24357 24168 24554 23984 24654 24064 24519 24087 24475 23974 24717 23739 24778 23987 24464 23950 24658 23818 24629 23927 24983 23898 24736 23832 24593 23938 24509 23968 24471 23938 24459 23938 24391 24018 24362 23978 24542 23863 24588 23948 24531 23840 24693 23734 24487 24046 24557 23941 24649 23851 24567 23880 24506 23938 24503 23842 24601 23872 24497 24048 24962 23884 24535 24064 24439 23982 24400 24053 24420 24018 24535 23966 24400 24049 24372 24071 24419 23993 24501 23969 24407 24093 24420 24131 24593 23990 24419 24044 24478 24003 24373 23973 24416 24045 24440 24039 24359 24064 24496 24146 24456 24202 24495 23824 24516 23960 24563 24172 24294 24334 24223 23979 24599 24072 24162 24270 24339 23943 24557 24056 24199 24260 24321 23952 24445 24131 24144 24366 24274 23996 24404 24135 24108 24338 24178 24106 24457 24148 24434 24198 24012 24461 24197 24004 24517 23985 24276 24188 24159 24390 24226 24173 24618 24121 24167 24363 24209 23946 24586 24153 24124 24520 24126 23964 24640 24064 24035 24512 24098 24133 24411 24647 23923 24473 24084 24359 24120 24156 24004 24577 23844 24612 24133 24307 24254 24520 24053 24471 24132 24360 24298 24087 24281 24564 23987 24460 24087 24372 24332 24252 24149 24597 23944 24518 24073 24432 24265 24375 24160 24488 24018 24690 23791 24537 24185 24400 24146 24676 24123 24569 23893 24621 24025 24396 24199 24374 24048 24453 24102 24597 23912 24700 23952 24521 24129 24410 24012 24525 24000 24709 23781 24637 23975 24633 24096 24389 24162 24238 24008 24660 23854 24696 23721 24721 23915 24596 23995 24579 24144 24394 24004 24560 23984 24689 23797 24788 23756 24769 23732 24658 23938 24686 24041 24475 24092 24448 24112 24333 24096 25049 23993 24547 24040 24682 23900 24676 23831 24699 23694 24725 23891 24708 24032 24739 23804 24552 23916 24578 23861 24470 23943 24395 23939 24541 23954 24550 24012 24416 24027 24576 23856 24480 23995 24403 23879 24443 23767 24564 24206 24488 23808 24746 23753 24576 23824 24500 23872 24521 23837 24482 23892 24430 23847 24468 23912 24409 23900 24354 23944 24525 23888 24364 24034 24393 24036 24357 23900 24392 23884 24437 24019 24439 24064 24464 24034 24391 23976 24474 23896 24503 23954 24525 23970 24576 24040 24553 23841 24438 23868 24458 23874 24385 23943 24341 23975 24320 24005 24340 24106 24541 14735 20631 21455 22225 21831 22644 22144 22825 22184 43436 29191 26358 25137 25054 24699 24700 24640 24569 24668 24484 24342 24378 24279 24563 24122 24726 24152 20346 22116 22784 22540 23126 23136 23075 23445 23093 37249 26888 25210 24913 24558 25012 24578 24705 24310 24512 24324 24392 24641 24337 24471 24271 24259 4487 21504 23224 23124 23370 23479 23397 23841 23430 23785 28703 25924 24882 24848 24499 24615 24345 24787 24017 24766 24132 24609 24248 24348 24483 24554 24219 18809 22776 23702 23445 23825 23771 23777 23838 23973 23484 26535 24636 24883 24452 24695 24386 24469 24234 24727 24053 24821 24196 24641 24212 24434 24139 24705 22248 24109 23846 24010 23912 24208 23674 24375 23556 24377 24746 24649 24292 24809 24066 24773 24025 24583 24208 24428 24169 24673 23917 24753 24116 24568 24247 24576 24074 24712 23970 24609 24141 24344 24183 24640 23763 24771 24023 24705 24188 24676 24039 24789 23933 24653 24103 24683 23908 24790 23880 24634 24109 24536 23978 24677 23812 24648 24058 24476 24128 24679 24040 24709 23974 24492 24168 24535 24064 24711 23795 24809 24019 24487 23936 24707 23808 24545 23937 24738 23889 24666 23814 24626 23980 24568 23992 24450 23978 24602 23784 24556 24181 24453 23972 24503 23906 24688 23750 24455 24057 24430 23827 24742 23777 24601 23913 24485 24004 24517 23922 24537 23862 24513 23887 24516 24095 23907 24023 24424 23960 24627 23947 24477 24037 24489 24096 24323 23940 24469 23875 24477 23328 24420 24009 24509 24034 24355 24152 24241 24028 24516 23973 24516 24033 24437 23885 24452 24079 24349 24037 24610 24081 24325 23948 24551 24010 24364 23837 24490 23996 24354 24144 24282 24317 24387 24231 24273 24208 24109 24327 24177 24179 24142 24256 24422 24460 24268 24332 24160 24345 24205 24336 24288 24300 24199 24229 24184 24115 24312 23989 24365 24017 24367 23963 24428 24096 24552 23978 24528 24086 24482 23914 24347 24040 24431 24032 24413 24006 24247 23943 24244 24040 24247 24118 24185 24129 24257 24181 24443 24101 24215 24299 24183 24416 24215 24391 24145 24370 24256 24436 24252 24387 24262 24361 24307 24263 24304 24373 24276 24320 24269 24357 24097 24381 24197 24448 24151 24503 24064 24585 24045 24532 24064 24650 23879 24636 23840 24544 23969 24529 24137 24411 24230 24301 24160 24334 24139 24456 24038 24586 23968 24676 23954 24680 23793 24698 23846 24713 24037 24597 24103 24327 24072 24376 24104 24519 24018 24598 23908 24638 23863 24625 23753 24663 23894 24588 23925 24547 23999 24363 24064 24475 24055 24672 23876 24680 23728 24727 23832 24649 23932 24476 24050 24357 24054 24466 24028 24611 23746 24631 23836 24698 23952 24640 24048 24477 23997 24469 23834 24592 23816 24631 23918 24550 23781 24540 23925 24535 24033 24300 23906 24421 23860 24705 23781 24452 23825 24359 23975 24384 23908 24452 23893 24346 23824 24367 23841 24538 23840 24619 23815 24464 23796 24535 23997 24394 23897 24497 23976 24352 23910 24513 23872 24561 23868 24384 23848 24432 24100 24348 24111 23643 24000 24264 24034 24486 23930 24406 23853 24346 24096 24371 24081 24132 23905 24362 23952 61 18984 21805 21676 22376 22146 22491 22380 22624 22301 35093 27056 25773 24672 24961 24355 20460 22199 22810 22853 23160 22930 23552 23035 23397 37784 27064 25472 25048 24724 24496 19264 22965 23010 23595 23089 23657 23688 23584 23656 23488 26393 25460 24504 24960 24481 17808 23133 23389 23845 23632 23600 23884 23531 24138 23553 26649 24946 24592 24846 24428 24544 23364 23724 24343 23820 24104 23980 23922 24234 23996 26233 24887 24317 24753 24187 24388 24515 24247 24518 24033 24770 24170 24476 24285 24396 24265 24718 23907 24640 24100 24512 24290 24370 24320 24502 23968 24666 24181 24386 24343 24291 24220 24565 24054 24690 24151 24476 24200 24384 24272 24581 23895 24680 24085 23959 24164 24536 24010 24680 23894 24627 24204 24289 24221 24664 23834 24729 23920 24528 24078 24533 24164 24599 24014 24641 24054 24544 24133 24400 23989 24701 23847 24689 24029 24375 24116 24676 23900 24648 23991 24540 24157 24519 23930 24718 23776 24712 24000 24440 24064 24738 23729 24731 23961 24458 24043 24672 23773 24743 23954 24499 24115 24644 23872 24711 24004 24557 24024 24503 23928 24713 23812 24560 24047 
20954 20789 21123 20860 21173 20695 21282 20667 21493 20563 21343 20806 21262 20727 21196 20775 21159 20969 21120 21200 21004 21242 20792 21299 20968 21409 20583 21342 20709 21408 20707 21464 20768 21145 20936 21083 21004 20234 19783 20359 19570 20408 19819 20374 20001 20290 20001 20436 19721 20439 19904 20307 19968 20254 19972 20506 19809 20671 20028 20369 20165 20632 19824 20813 19968 20585 20160 20335 20072 20678 19836 20766 20180 20403 20211 20714 20028 20855 20085 20693 20188 20722 19819 20889 20125 20610 20151 20931 19812 20848 20105 20681 19997 20968 20016 20741 20192 20904 19907 20795 20188 20770 20033 20951 20272 20689 20177 20965 20195 20592 20209 20976 20171 20826 20349 20869 20022 20881 20230 20995 19888 21006 20041 21062 20025 20773 20071 20965 20032 20841 20149 20814 20152 20905 20245 20842 19396 20839 20275 20833 20279 20757 20293 20821 20039 20902 20200 20852 20021 20901 20215 20869 19894 20902 20157 20874 20120 20864 20136 21063 20069 20813 20229 20921 20304 20677 20293 20777 20400 20847 20379 20856 20387 20901 20201 20785 20339 20775 20470 20821 20170 20864 20279 20917 55 0 1679 5488 6649 8505 8825 10215 10229 11429 36936 27190 23328 22590 21398 21665 20850 21111 20403 20936 20552 20983 20367 20842 20558 20759 20482 21022 20577 20695 20352 20675 20464 20872 20686 20668 20371 20711 20493 20823 20723 20720 20291 20554 20453 20840 20768 20848 20202 20633 20338 20703 20679 20912 20485 20466 20379 20758 20768 20932 20547 20416 20352 20649 20614 20967 20657 20452 20394 20551 20688 20953 20638 20513 20328 20668 20712 20968 20539 20439 20970 20709 20914 20521 20858 20290 20963 20583 21015 20471 20786 20320 20925 20720 20845 20545 20593 20562 20857 20791 20813 20613 20647 20536 20924 20712 20961 20480 20791 20236 21068 20593 21109 20321 20818 20502 21116 20615 21056 20480 20764 20592 21175 20475 21000 20320 20721 20632 21091 20493 21025 20191 20983 20520 21248 20432 20858 20375 21015 20657 21301 20362 20903 20083 21158 20613 21180 20354 20945 20193 21179 20541 21237 20421 20983 20419 21198 20445 21299 20270 20966 20032 21189 20618 21154 20391 20902 20417 21198 20525 21095 20358 21020 20504 21199 20532 21078 20313 21559 20510 21264 20409 21111 20304 21112 20217 21136 20416 21186 20341 21035 65 5998 10208 12480 12953 14223 14231 15291 14854 15713 40331 26608 22769 22343 20848 21539 20679 21299 20579 21359 20344 21248 20369 21291 20433 21152 20396 21068 20552 21149 20554 21073 20369 20903 20535 21050 20629 21130 20488 20979 20521 20963 20685 21081 20439 20936 20481 21064 20496 21025 20417 21050 20516 21137 20599 20923 20399 20998 20585 21089 20360 20834 20535 21050 20741 20992 20376 20946 20610 21196 20727 20869 20540 20883 20722 21128 20423 20175 20701 21097 20881 20801 20500 20880 20978 20930 20398 20887 20736 21124 20629 20776 20615 21015 20993 20645 20566 20841 20986 20809 20736 20716 20837 20950 20458 20740 20888 21082 20487 20779 20829 20936 20649 20775 20948 20569 21065 20919 20976 20534 20441 20740 21128 20515 20954 20856 21136 20496 21047 20871 20917 20603 21021 20802 20903 20807 21130 20797 20715 20792 21165 20613 21132 20837 21198 20528 21156 20784 21025 20696 21303 20656 20993 20691 21129 20471 21154 20686 21082 20742 21185 20412 21292 20489 21180 20672 21152 20699 21148 20673 21127 20554 21227 20561 21271 20410 21314 20611 21189 20660 21063 20650 21191 20466 21447 20296 21273 20640 21267 20380 21348 20534 8945 13836 16187 16059 17125 16868 17943 17310 18035 17579 26184 22231 21732 20933 21504 20861 21164 20589 21483 20820 21458 20512 21478 20565 21453 20471 21399 20337 21244 20574 21179 20473 21162 20531 21239 20612 21277 20486 21175 20490 21190 20503 21046 20705 21116 20580 21345 20421 21076 20499 21314 20361 21245 20436 21193 20496 21240 20393 21345 20505 21127 20513 21089 20498 21208 20505 21248 20539 20992 20575 21018 20758 21051 20535 21105 21018 21195 20582 21051 20617 20974 20611 21061 20656 21088 20499 21139 20512 21219 20576 21138 20518 21111 20613 20995 20701 20942 20695 21124 20631 21060 20727 21047 20650 21105 20578 21079 20595 21001 20554 21110 20412 21087 20526 21082 20516 21146 20538 21068 20643 21068 20369 21193 20457 21027 20585 20928 20567 21060 20526 21040 20791 20963 20824 21003 20986 20840 21137 20935 20976 20956 21104 20749 20774 20811 20828 21048 20640 21247 20679 21305 20703 21048 20695 20917 20871 20788 21027 20856 21049 20756 20873 20778 20742 21122 20532 21321 20666 21036 20701 20805 21025 20935 20935 20626 21165 20626 21217 20789 20968 20785 20953 20764 21228 20638 21158 20561 21201 20827 20997 20849 3734 16840 18119 18560 18999 18615 19398 18909 19356 19265 26356 22144 21356 20961 21287 20763 21424 20696 21268 20800 21061 20829 21152 20736 21382 20539 21326 20669 21214 20906 20938 20899 21250 20646 21436 20561 21329 20699 21285 20839 21178 20682 21351 20588 21335 20544 21251 20807 21026 20718 21329 20705 21385 20488 21376 20741 21217 20853 21216 20642 21399 20532 21480 20509 21284 20720 21205 20697 21332 20536 21500 20491 21468 20620 21191 20611 21378 20566 21509 20343 21424 20556 21393 20745 21181 20691 21381 20561 21451 20516 21376 20775 21189 20710 21280 20520 21381 20387 21533 20560 21534 20452 21239 20397 21449 20332 21372 20466 21219 20617 21154 20565 21309 20069 21176 20566 21205 20682 21143 20546 21205 20654 21152 20640 21182 20578 21189 20396 21400 20362 21271 20451 21276 20592 21189 20439 21269 20416 21365 20397 21211 20583 21065 20538 21313 20493 21269 20611 21120 20781 20992 20626 21189 20509 21303 20471 21273 20648 21319 20698 21200 20633 21160 20567 21141 20645 21134 20592 21197 20675 21283 20544 21120 20717 21009 20628 21341 20743 21137 20696 21127 20625 21058 20672 21292 20595 21014 20739 21131 20788 21201 20643 18514 19469 20065 19921 20228 19922 20400 19852 20202 30102 21632 21017 21277 20131 21190 20752 20994 20923 20886 20825 21287 20689 21024 21032 20933 20717 21287 20670 21005 21100 21015 20781 21170 20843 21077 20869 20834 21013 20961 20599 21383 20719 21008 21111 20963 20923 21094 20769 21007 20828 20903 20983 21027 20683 21388 20599 20994 21169 20801 20760 20984 20905 21028 21127 20663 21418 20761 20994 20888 21189 20575 21281 20777 21361 20928 21032 20768 21299 20758 20992 20963 20995 20900 21184 20634 21195 20953 21112 20945 21191 20806 21232 20675 21185 20912 21100 20827 21205 20630 21419 20656 20917 20836 21076 20726 21393 20596 21317 20832 21209 20855 21053 20919 21207 20805 21352 20437 21396 20571 21386 20517 21416 20517 21431 20535 21393 20722 21468 20659 21280 20802 21186 20864 21315 20758 21538 20483 21396 20640 21296 20823 21307 20662 21474 20535 21353 20751 21271 20636 21479 20368 21460 20702 21301 20647 21496 20515 21388 20793 21270 20632 21539 20614 21334 20814 21066 20736 21415 20417 21462 20715 21148 20778 21354 20672 21472 20509 21387 20682 21240 20729 21328 20489 21552 20365 21404 20529 21141 20630 21373 20593 21422 20504 21355 20729 21256 20576 21410 20515 21227 20641 21181 20679 21301 20640 21139 20739 21177 20633 21315 20336 21376 20501 21266 20539 21294 20440 21402 20375 21313 20658 21222 20560 21305 20377 21284 20520 21319 20580 21171 20695 21256 20332 21309 20625 21203 20615 21171 20665 21249 20609 21152 20585 21257 20660 21168 20727 21232 20680 21127 20514 21227 20676 21211 20736 21165 20680 21094 20619 21158 20621 21361 20625 21253 20688 21114 20817 21187 20664 21192 20731 21276 20723 21156 20823 21074 20817 20992 20804 21037 20695 21113 20627 21264 20853 21035 20965 20851 20877 21162 21064 20919 20958 21056 20635 21079 20744 21192 20790 21249 20818 21120 20913 20964 20940 20824 21138 21063 21168 20924 21047 20880 20850 21040 20704 21095 20537 21214 20599 21274 20749 21328 20685 21111 20969 20929 20865 20832 20981 20769 21095 20976 21201 20824 21267 20837 21061 21030 20881 21120 20909 20931 21102 20871 21227 20839 21168 20839 21249 20753 21328 20754 21323 20677 21255 20720 21225 20662 21256 20720 21177 20775 21227 20912 21262 20699 21152 20841 21357 21267 21298 20717 21242 20829 21307 20576 21326 20576 21337 20583 21383 20461 21388 20627 21413 20624 21343 20736 21288 20745 21319 20759 21248 20809 21255 20804 21254 20912 21481 20766 21127 20915 21159 20784 21253 20873 21160 20775 21398 20672 61 5262 9504 9775 11734 11646 12830 12659 13587 43344 32605 24611 22989 21770 21836 21006 21568 20783 21525 20709 21513 20465 21582 20471 21412 20541 65 6935 12970 14113 15364 15561 16268 16194 16870 16358 43352 25849 23505 21495 22042 20998 21602 20929 21386 20791 21431 20525 21445 20544 21496 20589 21383 64 14241 16023 17466 17316 18279 17717 18752 17972 18883 28801 23615 21735 21760 20949 21504 20626 21525 20749 21426 20647 21403 20720 21401 20596 21304 20624 12746 16996 18987 18514 19535 18858 19536 18915 19815 18889 24538 21619 21665 21028 21379 20737 21390 20829 21466 20813 21234 20717 21317 20824 21127 20715 21349 17684 19972 19825 20685 19874 20321 19863 20584 19884 30525 21712 21595 20843 21350 20800 21309 20753 21179 20832 21109 20795 21297 20580 21235 20725 21207 20807 21120 20820 21332 20496 21154 20995 21142 20875 21181 20658 21191 20966 21136 20848 21141 20738 21223 20800 20973 20962 21107 20698 21336 20884 20896 20953 20976 20756 21366 20711 20949 21121 21097 20889 21226 20696 21214 20940 20898 21181 20844 20836 21449 20613 20979 21077 20683 20905 21283 20748 21031 20914 20950 21075 20853 20688 21369 20763 20888 21208 20875 20944 20942 20580 21077 21056 20891 21234 20715 21376 20875 21024 20913 21223 20628 21346 20680 21271 20925 20909 21027 21129 20739 21218 20808 21144 21026 21052 20937 21104 20884 21283 20631 21314 20913 21203 20939 21041 20853 21228 20952 21440 20596 21426 20718 21254 20791 21157 20903 21195 20898 21329 20722 21395 20480 21463 20646 21334 20768 21343 20780 21218 20851 21401 20693 21440 20468 21487 20624 21406 20791 21182 20721 21168 20839 21309 20672 21459 20631 21531 20404 21517 20583 21456 20697 21449 20541 21522 20618 21464 20677 21405 20707 21364 20730 21309 20788 21266 20830 21194 20754 21097 20715 21202 20780 21164 20817 21283 20871 21327 20757 21389 20758 21364 20723 21343 20646 21303 20500 21446 20480 21270 20459 21254 20545 21293 20558 21240 20514 21264 20584 21340 20676 21310 20784 21272 20727 21286 20647 21161 20599 21176 20625 21145 20455 21257 20465 21284 20519 21376 20600 21326 20473 21223 20603 21248 20651 21323 20601 21392 20580 21309 20646 21303 20567 21405 20708 21289 20699 21261 20600 21136 20599 21234 20759 21142 20775 21245 20740 21057 20704 21261 20673 21163 20721 21255 20628 21337 20440 21231 20698 21161 20601 21177 20728 21141 20823 21026 20747 21027 20795 21278 20749 21408 20803 21187 20636 21161 20699 21191 20904 20905 21072 21355 20942 20801 20826 21086 20772 21312 20850 21241 20737 21063 20816 21013 21143 20939 20882 21000 20789 21190 20709 21388 20835 21113 20718 21012 21178 20903 21061 20897 20843 21061 20789 21308 20702 21290 20785 21111 20918 21047 21133 20910 21136 20804 20855 20729 21336 20884 21111 20913 21084 21093 21105 20949 21335 20727 21382 20781 21322 20743 21242 20824 21123 20954 20865 21083 21001 21008 21141 20875 21281 20709 21352 20747 21332 20849 21187 20921 21186 20912 21207 20870 21188 20741 21297 20684 21352 20713 21368 20784 21362 20947 21031 20979 21213 20752 21436 20551 21465 65 3534 8474 10973 11577 12763 12870 13838 13488 14612 41629 28090 23305 22342 21493 21622 8579 14106 14972 16409 15962 17168 16719 17387 16944 43368 26384 23381 21670 22105 21016 11264 15677 17959 17786 18568 18288 18999 18303 19279 43367 25903 22216 22183 21388 21593 11438 18137 18679 19656 19185 20017 19242 20023 19478 19975 24461 22405 21450 21872 20992 11993 18839 20573 19897 20775 19849 20747 19863 20798 20055 24152 21287 21568 20987 21554 20749 21584 20659 21581 20713 21312 20972 21232 20754 21472 20729 21593 20430 21488 20547 21428 20652 21340 20595 21525 20573 21435 20621 21364 20585 21335 20619 21498 20545 21270 20839 21228 20796 21299 20732 21361 20715 21312 20779 21228 20659 21313 20738 21260 20658 21287 20800 21117 20758 21355 20653 21295 20769 21133 20811 21133 20660 21476 21192 21216 20767 21229 20797 21113 20743 21280 20493 21242 20796 21152 20801 21377 20768 21298 20738 21209 20983 21088 20741 21380 20696 21154 21015 20901 20916 21299 20830 21131 21125 21034 21012 21285 20631 21022 21066 20985 20919 21313 21248 21218 20999 20978 21024 20978 20601 21248 20746 21015 20995 
21083 22001 21233 21865 21417 21770 21339 21724 21470 21728 21447 21799 21427 21569 21312 21659 21380 21709 21360 21806 21328 21750 21227 21851 21199 21805 21206 21783 21277 21745 21299 21623 21250 21723 21357 21718 21294 21710 21327 21934 21365 21589 21301 21623 21349 21695 21349 21769 21252 21881 21217 21826 21353 21815 21336 21698 21216 21716 21245 21798 21344 21773 21403 21762 21317 21664 21323 21671 21407 22144 21327 21583 21351 21667 21269 20592 20175 20457 20363 20477 20184 20759 20183 20594 20416 20416 20215 20706 20149 20552 20392 20493 20144 20661 20493 20503 20288 20925 20198 20493 20515 20752 20241 20679 20647 20589 20279 20596 20672 20449 20393 20786 20531 20647 20356 21098 20334 20584 20511 21049 20363 20609 20683 20937 20384 20734 20673 20873 20613 20749 20736 20781 20436 20744 20820 20819 20551 20954 20695 20576 21290 20946 20913 20451 20845 20873 20992 20633 20807 20923 20905 20684 20156 20837 20976 20744 20815 20921 20974 20866 20756 20776 21061 20922 20888 20561 21027 20882 21049 20663 20704 20961 21089 20844 20788 20815 21080 20928 21068 20636 20730 20932 21102 20852 21 2951 7400 9261 10831 11449 12451 12539 13652 43312 24365 21706 21648 21138 21616 21111 21444 20822 21212 20968 21496 21042 21368 20778 21345 20955 21470 21015 21397 20826 21361 20856 21455 20969 21480 20834 21278 20931 21494 20964 21577 20761 21256 20886 21497 20996 21434 20891 21114 20822 21394 21082 21463 20982 21207 20968 21417 21048 21560 20955 21345 20823 21376 20984 21610 20979 21464 20842 21351 20893 21381 20985 21447 20783 21260 21017 21367 20999 21511 20909 21272 21067 21356 21061 21473 20833 21327 20914 21402 20974 21556 20809 21432 20853 21516 20983 21282 21263 21385 20893 21553 20923 21421 20877 21399 20965 21489 20987 21312 20689 21336 20951 21500 21069 21326 20861 21382 20982 21587 21033 21483 20908 21400 21053 21473 20994 20915 20939 21396 21079 21475 20858 21369 20992 21398 21116 21436 20779 21408 21071 21456 21091 21313 20950 21271 21106 21493 21165 21317 20809 21277 21152 21546 21256 21274 21075 21334 21095 21467 21194 21202 21004 21350 21097 21564 21229 21220 20946 21292 21139 21628 21078 21108 21076 21325 21398 21511 21035 21389 21066 21302 21452 21354 21137 21157 21088 21457 21398 21328 21367 21253 3468 14552 15547 15984 16796 17165 17296 17447 17474 17493 25143 21952 21691 21267 21239 21255 21524 21362 21432 21137 21352 21331 21490 21415 21440 21223 21316 21308 21474 21403 21494 21205 21355 21258 21607 21376 21593 21114 21372 21114 21554 21320 21479 21177 21328 21217 21624 21384 21485 21105 21209 21228 21603 21312 21433 21056 21463 21287 21570 21219 21486 21063 21580 21256 21625 21086 21349 21165 21738 21160 21551 20947 21607 21253 21773 21133 21456 21052 21717 21165 21552 20944 21578 21240 21686 21089 21453 21177 21704 21265 21553 21077 21719 21266 21608 20942 21696 21204 21721 21043 21694 20951 21779 21149 21486 21082 21600 21100 21461 21165 21536 21149 21764 21058 21559 21161 21677 21050 21632 21176 21494 21075 21695 21033 21632 20939 21745 21037 21504 21069 21648 20994 21477 21099 21649 21100 21600 21191 21536 21045 21655 21155 21551 21156 21704 21003 21573 21152 21550 21032 21572 21226 21467 21125 21688 21032 21529 21237 21431 21045 21628 21149 21504 21091 21575 21248 21524 21153 21511 21202 21451 21155 21506 21096 21464 20930 21593 21070 21628 21149 21356 21304 21399 21211 21550 21123 21476 21307 21427 20980 21712 21200 16981 18120 18829 18562 19009 19061 19481 19034 19323 30232 22279 21284 21333 21278 21660 21107 21382 21102 21786 21233 21275 21085 21751 21175 21332 21160 21710 21223 21446 21352 21634 21103 21411 21383 21500 21159 21349 21531 21425 21221 21323 21549 21117 21450 21473 21480 21294 21619 21399 21256 21411 21531 21101 21571 21445 21386 21484 21485 21344 21612 21295 21552 21479 21295 21480 21548 21289 21592 21200 21560 21271 21530 21405 21452 21339 21528 21277 21675 21128 21552 21261 21633 21328 21447 21513 21312 21451 21557 21382 21552 21248 21671 21273 21648 21043 21745 21047 21689 21011 21680 21169 21719 21314 21552 21389 21528 21291 21509 21399 21402 21346 21495 21360 21436 21386 21588 21358 21612 21277 21508 21313 21546 21303 21447 21285 21504 21252 21507 21268 21492 21288 21488 21328 21653 21250 21683 21220 21692 21169 21701 21227 21783 21200 21783 21057 21721 21097 21716 21200 21688 21224 21466 21224 21557 21229 21606 21091 21824 20999 21822 21120 21714 21015 21702 21179 21618 21216 21743 21063 21636 21093 21836 20997 21754 21096 21666 21235 21560 21239 21720 21157 21692 21161 21718 20794 21605 21012 21744 21164 21658 21059 16688 19481 20408 19913 20569 20068 20475 20096 20482 20150 22473 21254 21613 21145 21717 21052 21541 21202 21618 21244 21719 21112 21696 21118 21621 21105 21542 21275 21520 21210 21544 21252 21669 21174 21733 21102 21630 21324 21411 21123 21632 21069 21628 21073 21568 21169 21547 21182 21521 21173 21707 21127 21624 21065 21526 21384 21571 21210 21544 21162 21763 21113 21585 21325 21461 21506 21419 21308 21659 21176 21557 21206 21476 21396 21440 21296 21570 21159 21781 21059 21575 21420 21390 21389 21437 21192 21773 21101 21581 21243 21420 21637 21424 21262 21595 21114 21782 21072 21536 21600 21460 21397 21520 21254 21943 21210 21444 21319 21424 21655 21451 21278 21767 21164 21620 21268 21380 21480 21105 21616 21363 21472 21496 21287 21495 21619 21266 21705 21303 21492 21525 21345 21525 21556 21240 21609 21277 21509 21515 21287 21536 21549 21740 21674 21248 21549 21504 21393 21528 21667 21636 21674 21321 21629 21445 21383 21479 21582 21315 21686 21248 21649 21421 21351 21389 21632 21036 21690 21223 21655 21390 21410 21379 21684 21235 21744 21313 21600 21436 21521 21260 21765 21104 21757 21383 21623 21393 21725 21092 21793 21216 21595 20637 21138 20825 21334 20729 21316 20914 21081 20925 24042 21091 21826 21216 21633 21321 21577 21209 21843 21050 21735 21331 21466 21308 21796 21002 21736 21315 21520 21428 21650 21178 21722 21229 21662 21402 21597 21273 21829 21031 21815 21257 21504 21298 21721 20716 21781 21209 21607 21127 21712 21041 21715 21007 21671 21216 21541 21145 21688 21042 21626 21331 21605 21296 21818 21250 21700 21263 21716 21122 21811 21058 21686 21115 21640 21176 21726 21140 21640 21124 21663 21150 21765 21123 21734 21095 21718 21204 22045 21186 21729 21051 21761 21168 21572 21239 21508 21184 21824 21303 21643 21261 21546 21271 21665 21187 21768 21025 21604 21290 21530 21248 21549 21158 21699 21105 21825 21168 21614 21041 21641 21114 21684 21057 21734 21232 21649 21178 21703 21274 21639 21212 21568 21230 21557 21355 21575 21108 21668 21154 21631 21383 21552 21344 21560 21192 21591 21385 21540 21386 21589 21234 21677 21285 21556 21331 21585 21187 21611 21299 21653 21521 21600 21318 21744 21328 21570 21589 21406 21134 21752 21201 21490 21449 21360 21400 21521 21227 21814 21313 21383 21552 21399 21190 21667 21117 21666 21350 21425 21516 21528 21141 21633 21344 21410 21491 21592 21331 21719 21349 21427 21280 21644 21319 21433 21682 21185 21685 21511 21429 21539 21576 21413 21700 21480 21617 21541 21472 21469 21548 21321 21607 21492 21477 21570 21402 21467 21658 21315 21581 21376 21528 21509 21012 21460 21713 21248 21691 21379 21477 21536 21513 21431 21646 21366 21704 21403 21811 21376 21402 21481 21946 21376 21616 21303 21729 20577 21719 21461 21432 21493 21651 21366 21707 21144 21735 21220 21696 21504 21479 21413 21616 21404 21684 21179 21781 21365 21720 21346 21632 21323 21561 21470 21662 21312 21739 21193 21870 21123 21760 21131 21762 21333 21611 21321 21569 21371 22009 21401 21721 21252 21841 21145 21798 21084 21840 21057 21749 21258 21788 21240 21632 21464 21509 21333 21537 21396 21797 21341 21822 21261 21696 21280 21860 21189 21831 21143 21701 21039 21803 21233 21796 21110 21813 21109 21824 21121 21737 21254 21621 21102 21659 21248 21554 21301 21618 21304 21676 21260 21600 21328 21721 21157 21693 21102 21667 21032 21709 21152 21857 21209 21800 21377 21810 20966 21721 21143 21789 20957 21740 21057 21794 21221 21748 21207 21664 20934 21736 21037 21806 21064 21664 21099 21596 21105 21564 21148 21645 21306 21690 21328 21706 21303 21593 21317 21619 21296 21644 21269 21699 21255 21620 21203 21569 21281 21705 21339 21656 21307 21733 21234 11403 13893 15139 14983 15890 15736 16327 16313 16625 29435 22882 21497 21399 21233 21344 21296 21590 21264 21647 21207 21656 21112 21628 21083 21568 21256 4233 16651 17540 18167 18465 18208 18530 18357 18904 18553 25419 21593 21713 21261 21463 21395 21440 21608 21601 21296 21376 21332 21669 21171 21893 21115 21495 15601 18994 19573 19513 19632 19847 19611 20240 19819 20128 22513 21858 21512 21403 21667 21203 21657 21574 21563 21552 21415 21462 21674 21239 21693 21379 21749 19228 20125 20535 20539 20614 20800 20452 20747 20624 35655 21942 21504 21533 21569 21348 21702 21315 21662 21566 21688 21488 21603 21366 21772 21143 21762 21446 20784 21143 21120 21015 21371 20969 21317 21041 21115 23809 21852 21241 21853 21356 21675 21488 21590 21465 21817 21155 21778 21384 21608 21452 21559 21319 21760 21211 21675 21428 21446 21430 21720 21306 21803 21309 22117 21456 21680 21291 21893 21279 21773 21435 21664 21308 21905 21152 21808 21360 21613 21266 21831 21080 21788 21369 21511 21381 21825 21024 21894 21303 21637 21405 21575 21302 21897 21069 21851 21335 21833 21368 21767 21140 21865 21271 21692 21107 21824 21120 21818 21115 21716 21217 21616 21155 21800 21256 21728 21255 21757 21228 21688 21242 21761 21255 21674 21271 21625 21345 21784 21046 21765 21126 21672 21265 21683 21226 21870 21282 21686 21298 21723 21315 21639 21281 21788 21221 21774 21144 21725 21305 21568 21321 21580 21255 21770 21120 21736 21117 21739 21354 21634 21397 21704 21209 21680 21237 21767 21285 21691 21132 21660 21293 21608 21358 21874 21249 21536 21259 21856 21211 21684 21193 21792 21250 21584 21362 21719 21362 21536 21289 21754 21177 21859 21191 21869 21191 21844 21255 21789 21238 21824 21325 21826 21317 21725 21283 21606 21346 21592 21476 21624 21307 21440 21240 21382 21461 21589 21500 21687 21536 21964 21652 21467 21634 21508 21525 21382 21584 21452 21595 21400 21735 21496 21706 21489 21603 21889 21620 21339 21525 21495 21369 21371 21480 21419 21476 21461 21593 21168 21649 21303 21681 21284 21712 21192 21721 21350 21689 21301 21676 21275 21720 21325 21655 21338 21712 21323 21680 21324 21613 21259 21768 21318 21673 21402 21711 21414 21785 21440 21669 21540 21600 21521 21656 21415 21544 21540 21488 21584 21557 21513 21527 21388 21754 21445 21888 21157 21824 21224 21721 21352 21755 21480 21415 21440 21495 21447 21641 21447 21786 21194 21801 21239 21847 21141 21839 21290 21774 21431 21708 21463 21487 21461 21591 21350 21739 21334 21905 21232 21888 21265 21938 21273 21911 21358 21681 21383 21563 21337 21687 21283 21851 21373 21857 21120 21865 21360 21745 21515 21568 21423 21585 21429 21850 21152 21905 21008 21961 21172 21722 21389 21684 21232 21698 21124 21707 21232 21733 21211 21729 21136 21769 21250 21646 21334 21616 21427 21601 21211 21687 21104 21877 21161 21869 21287 21731 21216 21760 21399 21654 21264 21588 21192 21708 21140 21840 21230 21897 21319 21707 21141 21708 21321 21668 21351 21816 21331 21655 21230 21705 21272 21792 21263 21616 21279 21630 21403 21729 21303 21641 21276 21713 21173 21888 21221 21682 6257 13531 14801 15812 15767 16458 16214 16946 16601 17115 24144 22299 21389 21578 21187 4063 17240 18593 18224 18818 18455 18997 18957 19033 19090 25137 21688 21640 21312 21815 21129 18828 19388 19977 19980 20277 19968 20201 19940 20462 27085 22056 21545 21569 21720 21584 18854 20698 20375 20976 20455 20963 20538 20743 20880 20825 21940 21526 21392 21909 21280 19191 20743 21157 21251 21130 21187 21175 20978 21560 21015 22135 21510 21563 21709 21760 21355 21693 21512 21716 21446 21644 21632 21473 21642 21287 21718 21483 21585 21625 21510 21453 21666 21394 21667 21543 21609 21555 21520 21572 21638 21325 21709 21553 21943 21608 21656 21400 21687 21344 21678 21508 21426 21523 21701 21353 21807 21229 21775 21504 21463 21528 21701 21306 21809 21304 21645 21479 21632 21376 21818 21260 21837 21461 21687 21465 21554 21427 21837 21204 21845 21410 21557 21521 21777 21180 21834 21379 21696 21473 21633 21336 21842 21179 21840 21413 21600 21412 21913 21232 21904 21303 21592 21378 21816 21165 21975 21314 21499 21419 21815 21273 21888 21305 21719 21403 21676 21313 21885 21143 21789 21440 21682 21367 21934 
38807 38584 40306 37207 42112 36079 41392 35732 42729 35629 42451 36587 42196 33841 40647 34947 41451 35607 41332 36600 41009 36011 40336 37104 40130 36549 40022 36272 40688 35857 40816 34641 40043 35737 41592 35655 40843 35606 41319 38026 41703 34147 40769 34640 41336 35544 41399 36037 40161 37425 40086 36584 41501 36746 41168 35240 39858 35441 40541 36371 41163 36192 42003 35872 41004 34733 41109 35127 42084 39883 41542 34231 41459 34972 40417 34344 40755 34881 40816 34688 42564 35348 41312 35068 40295 35870 39296 37312 41132 42327 34311 34744 40655 35641 41992 35176 32944 35516 40220 34085 42307 38469 41155 34184 39020 38677 41892 33888 40201 36151 34408 33302 32419 33712 41032 39009 41416 33307 32235 38042 41543 33472 34228 36947 41432 35253 33992 36161 33354 34816 34440 35296 42043 34961 35609 35696 32768 37091 34551 32752 40454 37239 36742 42384 36453 36293 37324 33688 35568 36963 36720 34288 39388 36124 37344 34748 35827 36872 37637 36128 34855 35056 38307 36982 36405 32768 37784 36338 38248 34216 34262 37148 38649 36171 35280 35840 38482 36838 38476 33776 34807 36819 38992 36187 17978 28790 26065 24975 31840 28500 28314 29545 31287 40978 43652 35569 34265 38968 34181 38970 42376 36036 40083 37510 42935 38329 41655 35468 41226 37591 42817 38196 41920 36069 41440 36361 42679 37744 42754 36104 40656 37159 42976 37589 33792 34921 40136 36597 43008 37779 42336 36864 39045 35893 41644 38851 42796 37896 40152 37510 42131 38403 33543 37248 41300 36108 41349 37783 34228 37483 42540 36295 41522 36871 41645 37908 42544 35779 40338 38020 41815 37944 33008 36690 40419 38711 41624 38606 42700 36117 41333 36919 41898 37852 33451 35510 42089 36445 32920 37565 40561 40713 41904 36896 33366 36870 42231 36694 41955 37658 42852 38066 40844 34538 41076 37536 43096 38872 41344 36628 41634 37848 33920 37924 42950 37027 41792 38646 42699 37709 36956 37202 41745 38928 42827 36535 41680 37568 41869 39311 42443 35652 41712 38923 42426 38996 41002 37400 40647 39013 43079 39927 41189 35911 40645 39349 33469 40073 40684 38694 41348 39109 42863 40121 39994 37848 41488 39041 33720 40247 40224 37232 40807 39380 34560 38474 38972 38566 41337 42080 33221 38021 41879 38656 40976 42693 41776 39306 39552 38656 42522 42125 41239 41925 40539 25352 30457 31478 36032 33581 37408 38668 30533 30283 30643 40706 37913 35248 40368 40652 40580 33154 41300 42400 39337 41496 41432 43060 42469 42416 40551 41104 41187 42849 42317 43260 40288 41779 40576 34406 41248 34169 38912 41822 39256 33484 40824 43090 39976 41153 40237 34455 41461 43218 39125 40179 40440 34262 40664 42485 38360 42777 41093 33746 39994 43128 38771 33898 40088 34560 38679 41543 39860 35808 39332 33733 37051 34245 40164 36152 39207 42427 38564 35488 39575 33379 36811 33740 40177 35178 38553 42695 39958 35293 40276 33520 38439 35612 40282 34232 37120 34951 39792 35606 38114 35264 37276 35975 39401 43109 38916 33966 38756 42690 39904 33187 39277 35773 38177 33696 39337 35097 38196 34178 39450 43084 38833 35435 38000 34167 37077 35680 38168 32642 38400 34402 37331 42786 39220 34560 38771 33936 39770 33162 38056 34756 39296 33728 39179 35242 37708 33730 39033 33600 37811 33616 40087 42888 39316 35084 37881 33180 40216 42509 38483 34513 39322 32699 38551 33884 39877 33104 39114 33068 39665 42684 39658 32835 38544 42596 37125 33986 38457 34512 39336 41653 41068 42168 40408 33680 38862 42737 41352 42426 37774 35201 39660 35760 37734 35195 31858 36695 37674 31864 37112 40508 44464 41728 40816 41459 40914 34889 38868 41740 39213 36153 40224 40820 38977 36040 39720 41267 39577 35529 40236 42531 41667 34464 39001 42093 42025 43334 39847 41594 33496 41904 40427 41398 33728 39084 42544 42912 43040 41187 34527 41846 40487 42180 33528 38838 33748 42208 41964 43131 43320 41491 34452 40875 33444 42685 41288 42949 33702 40590 34034 39586 33604 40448 33304 41860 42727 41703 33270 40521 35136 38900 33357 40324 34390 40856 42697 33203 40616 42736 33781 41481 33479 39871 35056 40454 34513 38058 35735 38306 35138 37738 34798 39388 35636 40836 33440 41680 33258 40672 33034 41759 42137 41548 43328 41696 42592 41999 34037 41504 34435 40584 32930 40714 33536 40837 42711 40992 32814 39989 32963 40192 43016 40928 42922 41280 34808 40043 35124 39994 35265 39415 35317 40279 36266 39684 36240 38211 35532 38775 35376 39664 35102 40048 42832 40418 33704 40247 34279 38640 36395 37696 36663 38755 35347 37848 35241 39725 34321 39808 36044 38464 34337 38667 36747 37616 35912 38666 34744 40246 33625 40349 35474 39377 35248 39424 35517 35498 34035 37568 35600 39466 34768 38252 32279 31593 41544 36983 32992 38137 42857 38712 31797 39066 43552 40620 34515 39193 35514 38272 33357 39671 34315 40357 35664 38880 35024 39114 34451 38732 33368 40493 32982 39864 33376 40020 34945 39549 35737 38938 34654 41031 42219 39248 34230 38468 34520 38336 33478 39332 33579 39696 33050 39472 35474 39085 34390 38326 33145 41392 33847 39912 33370 39328 35848 39010 33865 41102 42797 33000 41996 41238 34968 39504 33641 39834 42805 42040 42378 40905 33728 39410 36104 38326 33879 41974 42103 42133 42720 40018 36135 38960 34004 40405 42322 34645 41868 40728 34269 38930 36082 38296 33088 33672 42273 42130 33063 40116 38104 40112 42434 41441 42200 34968 42432 40965 36083 39491 34355 40258 41690 42967 39137 34208 41462 42743 43211 41116 43304 34620 40221 35415 40929 43072 33388 41111 33286 33224 40173 34346 40569 33041 32814 40602 33200 33318 35457 34785 39920 33664 32401 41456 33242 34595 34071 34724 40999 34760 42265 42039 43160 34216 40889 35213 39947 34592 42128 41827 42105 34372 38039 35137 40209 34883 41741 42132 41875 35152 40265 35718 40842 34048 42180 33192 40209 35939 38688 36120 41719 34688 41584 35840 38637 36136 39882 34227 33702 38936 35948 41209 35096 40854 36884 38656 37153 40104 38901 36522 39906 34377 40983 33944 39912 36887 38266 35798 41159 42854 41280 36291 37632 35603 40960 32995 41920 34674 39597 35600 40328 34969 41798 34359 40435 36738 38113 36580 40332 32779 40533 35632 34741 35904 39995 34385 39040 35241 37997 35425 37857 34970 39837 33432 39136 35079 37989 34457 41092 34320 40500 36625 40119 35234 40534 35465 38822 36453 38216 35084 39072 34421 39472 35730 39080 34430 38806 35017 39362 35886 38960 35712 38849 35488 39819 39028 39749 35591 38336 35712 39315 33701 40352 32903 39353 36424 40965 34738 40396 33521 40448 34816 39671 35847 37829 34057 40604 33312 39867 33643 39288 35259 38766 36512 39360 34453 37976 34480 38958 35000 38178 35672 40053 34592 39588 35429 40484 34660 39990 33568 40235 33675 41447 34024 38748 34774 39188 34778 41656 33482 41005 33655 39588 34144 41568 33398 41512 34135 40097 35157 40616 33583 41051 33965 39626 34413 40738 34739 32820 33657 40883 35742 40950 33712 33753 41874 39466 35894 39808 42950 42768 41672 42026 33187 40182 36545 40888 41955 33511 41776 40008 34917 39113 34744 41344 42311 33224 32838 39049 34326 41056 42089 43212 34176 41088 35713 41392 42416 40699 34660 41094 42506 35141 39586 35147 32865 42022 33496 33467 41848 35316 42588 34486 33168 42274 43063 33715 40944 34441 42704 43074 33842 41760 42997 34951 40914 34112 41236 33232 32651 37560 42496 35521 39973 35345 41528 43011 33329 32720 42119 34840 41536 35360 41908 36600 41360 42128 43107 38103 41449 34304 40874 35652 33078 35346 42499 42468 43264 34871 41540 35584 39122 35840 40024 35088 32487 42628 42328 34348 41803 35145 39721 36128 41564 35573 41229 34320 41092 33773 42613 35082 40705 35952 39802 37328 39017 35636 39142 35744 41190 34496 40994 33748 41648 38852 42011 35712 40128 36792 39276 36311 38656 36619 38251 35896 40293 36249 40304 34280 42370 33122 41068 33364 41543 36373 41454 36823 40505 35111 40346 37034 39797 36828 39347 35320 38268 36432 40199 36246 38956 36508 38968 36422 38865 35760 40236 34502 38880 34868 39936 33520 40736 34369 40705 35086 40311 34026 40845 35651 39362 35360 38922 34856 37865 35456 39095 36945 40037 36282 41400 36459 37422 35493 39290 36315 37502 35729 38199 36108 40160 35872 40064 34693 36986 35563 38184 36461 38330 34603 38856 34103 38712 33704 39185 34696 40836 35264 40912 35441 40936 34164 40912 34492 40512 34644 40410 35312 40342 34409 39855 33677 40393 35405 41344 34743 40961 35795 40115 28455 33881 37078 35733 35213 33618 39858 39975 31904 45866 37872 43076 42269 40502 41357 40852 34103 40115 34851 40017 34688 38864 34536 38645 33513 40064 22709 31405 31056 38272 30874 38192 31731 40019 36000 32082 43628 34304 35144 40410 42872 42096 42389 34348 33834 40464 41548 41376 35011 39521 37361 39209 43201 32528 36576 33024 32096 33233 35872 33422 39719 35971 38797 43904 37143 32809 41786 34998 39868 34804 33592 33520 33069 41942 42837 35140 40465 35408 41526 36044 39242 39240 32768 32497 33177 35168 42208 35207 33266 41344 38032 32648 33066 33346 41144 35397 40933 35002 33632 34784 42568 34352 41504 36096 39318 35753 42309 35385 39296 38882 38018 41862 37702 41100 38259 39225 37363 36904 40425 37161 41554 35200 42592 34184 42484 36721 39392 35960 41531 34292 42336 33898 41024 35713 40100 35132 42031 42647 42544 35623 40864 36550 41088 39867 42477 35021 40774 37420 40835 36170 42368 34800 40882 37482 39197 36265 41357 34544 40234 36844 38524 36176 41665 33207 41456 36633 37735 37299 41025 34582 41938 34048 40752 37475 38624 37037 41370 36812 41584 36115 39093 37152 40615 35298 38886 36404 38756 36557 39139 35397 39975 34225 39272 36256 40192 35513 40338 36198 40248 35117 40361 35796 40347 35021 40518 34615 41176 36137 38195 35848 38992 34849 40256 35136 40160 37332 40557 35197 40654 35760 40965 34709 40439 36240 40168 36136 39160 35734 40900 33625 40946 33976 40262 35980 38743 35648 39136 35888 41443 34442 41731 35366 39973 34896 40297 36054 40663 35370 39072 34797 40800 34256 41514 37217 40168 33185 40288 36874 40168 35062 39768 36065 40101 33802 41333 35736 41433 33244 40577 36040 39664 37070 39920 37325 39936 36807 40408 36366 40368 36472 41242 36619 41041 35804 40616 34296 41161 34050 42500 34548 40952 42313 40593 41836 42852 34199 42901 35383 32960 37845 34533 42610 34500 32611 32846 41421 33864 42320 34344 41649 35953 42843 35532 42726 34375 36885 34241 41309 33312 42880 42000 42065 42997 42523 42967 42899 34278 39255 34561 40896 35059 40480 35317 39672 35600 41373 35303 40817 35091 40576 35531 41188 34922 41208 35351 41142 34970 41044 34536 40344 35888 40995 35057 41792 35752 41973 36294 42074 35056 33079 33680 32727 34341 42009 33497 33005 42459 33912 33366 32712 32963 41530 36096 42325 37234 39457 36447 40104 35620 41316 36208 42669 42512 42412 43384 42842 34729 42376 36298 39821 36395 40480 37062 39242 37011 40745 36178 42315 35544 42614 43402 42944 34316 41321 35978 41207 37496 40148 37141 40352 37864 40600 37738 41687 35098 41669 33924 41164 35335 40582 37122 41826 37064 38774 37136 41387 35903 32972 33248 42160 34012 42093 37065 39191 37417 37601 38125 39579 35595 41789 35136 40056 35192 38857 35451 40056 35767 40100 35619 38919 35943 40085 34747 41136 34276 42064 34229 40046 35275 38664 37269 39512 37316 40822 35763 39868 35665 41896 34832 40144 33976 39601 35404 39050 36626 40384 37451 41181 35558 39184 35398 41030 34884 41460 36535 41205 34920 40304 35400 40376 36101 40586 34257 40700 34729 41901 35703 40960 34625 40484 35424 39576 37100 40197 35014 23959 29968 33323 34309 34034 29671 38429 35204 31456 37111 40771 41821 42101 34000 39623 31889 38041 32416 38459 34864 30792 36641 36496 37328 37812 40786 35150 34232 40664 36693 38965 35280 40945 37512 37410 40573 37184 39914 37156 42632 41794 39141 33464 33368 35193 33558 35203 34392 41495 37568 42592 37646 32628 34712 36097 35840 37687 33105 41384 37642 40493 39363 35030 39352 40373 39248 39876 39875 37607 33495 37743 40112 33015 33495 35244 35413 41541 35443 32726 35095 42290 34724 34020 42451 34696 40711 35590 42848 34055 34272 32704 42349 34913 41575 34993 33303 33991 33321 32610 33355 34210 41111 35608 33293 37715 34112 34400 41650 35368 41104 35219 32637 41865 33280 35042 41394 36736 40384 36264 32545 42457 33299 35024 40859 36448 40816 34788 42762 34400 41255 36660 40367 36949 42581 35412 42556 33635 42024 37016 39890 36933 41882 33783 32768 35659 39682 36759 41593 35160 42519 34503 41080 36826 39804 36676 42032 34114 41792 37730 40148 37346 41025 34094 41344 36556 39639 38464 40974 43409 42553 36786 40553 37152 40960 35721 41953 35136 40816 37591 39376 36328 42082 35109 41664 38070 
23545 23255 23541 23276 23643 23287 23650 23351 23671 23258 23736 23306 23666 23261 23705 23688 23691 23310 23652 23319 23570 23304 23576 23330 23574 23365 23520 23357 23574 23303 23516 23239 23591 23304 23559 23255 23627 23199 23703 23308 23641 23212 23640 23088 23577 23283 23511 23220 23597 23296 23536 23336 23512 23328 23481 23336 23456 23384 23545 23277 23489 23296 23601 23218 23595 23319 23561 23301 23626 23108 23714 23302 23632 23228 23657 23189 23613 23202 23659 23228 23719 23263 23524 23312 23406 23332 23409 23184 23535 23239 23393 23515 23399 23259 23600 23365 23330 23523 23475 23253 23534 23437 23717 23285 23394 23185 23768 23304 23336 23457 23491 23585 23408 23205 23281 23574 23513 23374 23283 23363 23697 23308 23296 23185 23712 23328 23366 23325 23580 23543 23367 23413 23531 23527 23375 22978 23417 23559 23405 23136 23313 23671 23425 23369 22987 23456 23437 23559 23180 23628 23429 23433 23350 23687 23396 23447 23620 23618 23408 23495 23178 23568 23419 23634 23189 23368 23355 23677 23357 23424 23283 23668 23441 23544 23138 23571 23457 23632 23379 23436 23242 23688 23388 55 12697 16668 17222 18087 17940 18416 18063 19153 18437 33824 27225 26086 25025 25202 24667 24842 24207 24394 24141 24342 24029 24348 23787 24036 23733 24151 23769 24167 23578 23904 23397 24043 23643 24064 23592 23783 23451 23962 23585 24013 23468 23817 23296 23837 23565 23939 23470 23832 23237 23795 23552 23808 23521 23748 23256 23617 23352 23910 23488 23768 23324 23663 23368 23900 23302 23893 23319 23689 23226 23733 23217 23863 23272 23618 23276 23680 23348 23786 23250 23629 23291 23628 23371 23794 23311 23560 23240 23645 23249 23799 23158 23612 23253 23637 23360 23726 23131 23646 23256 23651 23285 23761 23226 23581 23272 23568 23498 23589 23232 23588 23346 23508 23439 23623 23188 23533 23245 23601 23367 23608 23503 23542 23321 23557 23352 23477 23236 23584 23318 23607 23392 23455 23241 23519 23324 23648 23162 23431 23275 23540 23424 23666 23168 23463 23357 23552 23478 23595 23152 23509 23336 23539 23628 23552 23165 22962 23300 23521 23634 23462 23253 23404 23327 23553 23591 23606 23264 23301 23312 23589 23574 23373 23512 23265 23369 23660 23551 23303 23234 23395 23456 23751 23329 23213 23241 23488 23608 23628 23143 23387 23241 14528 18481 18955 19104 19553 20041 19953 20232 19876 20101 27122 25776 24905 24704 24080 24408 24192 24306 24005 23982 24033 24007 23830 23997 23760 23736 23784 23799 23711 23868 23653 23773 23401 23828 23631 23936 23525 23687 23538 23751 23581 23822 23598 23580 23303 23726 23637 23801 23437 23564 23033 23745 23525 23796 23348 23567 23346 23849 23403 23733 23214 23902 23422 23832 23380 23649 23148 23778 23448 23840 23296 23528 23265 23855 23351 23716 23133 23717 23402 23808 23226 23655 23355 23768 23386 23600 23595 23744 23429 23690 23191 23688 23402 23756 23271 23493 23288 23831 23336 23574 23229 23844 23224 23729 23657 23584 23252 23682 23201 23585 23331 23608 23260 23600 23375 23620 23218 23620 23297 23642 23278 23520 23303 23632 23134 23607 23224 23538 23229 23597 23323 23444 23193 23609 23148 23510 23235 23632 23072 23607 23321 23537 23227 23529 23401 23584 23229 23594 23280 23514 23208 23591 23484 23573 23381 23517 23286 23582 23370 23580 23367 23437 23338 23458 23255 23478 23244 23578 23315 23520 23322 23444 23348 23461 23388 23399 23470 23451 23163 23495 23219 23619 23371 23459 23426 23479 23230 23543 23405 23482 23316 6580 19204 19940 20658 20935 20703 20975 21255 21293 21056 27454 25212 24612 24069 23856 23893 24125 23705 23663 23624 24040 23649 23535 23479 24000 23477 23536 23584 23792 23445 23352 23657 23620 23358 23457 23735 23482 23362 23573 23637 23472 23429 23505 23636 23232 23661 23544 23479 23394 23712 23351 23568 23444 23580 23284 23703 23456 23593 23472 23488 23490 23630 23237 23638 23266 23601 23439 23387 23471 23597 23280 23687 23140 23700 23269 23684 23400 23441 23441 23561 23354 23723 23181 23752 23126 23581 23383 23635 23302 23651 23354 23433 23405 23566 23357 23349 23347 23552 23331 23608 23232 23717 23291 23670 23099 23753 23086 23692 23111 23706 22963 23736 23202 23744 23192 23703 23204 23690 23207 23675 23216 23688 23193 23741 23185 23783 23127 23750 23151 23671 22968 23783 23104 23776 22987 23765 23102 23705 23182 23666 23248 23663 23293 23546 23372 23918 23399 23453 23343 23545 23321 23608 23193 23701 23141 23813 22994 23786 23142 23592 23232 23500 23257 23547 23136 23559 23093 23737 23143 23652 23158 23568 23112 23616 23289 23480 23255 23445 23186 23661 23117 23598 23047 23564 23257 23512 23284 23561 23148 23619 23127 23681 19145 21324 21144 21795 21644 21959 21717 21896 21719 36321 24417 24305 23524 23904 23613 23642 23427 23584 23376 23734 23254 23710 23287 23606 23414 22923 23336 23552 23207 23689 23741 23529 23285 23477 23389 23570 23305 23568 23279 23583 23217 23607 23386 23417 23343 23466 23239 23685 23048 23504 23253 23509 23323 23428 23278 23680 23223 23724 23157 23496 23460 23367 23461 23264 23285 23659 23115 23464 23317 23446 23472 23242 23329 23649 23249 23494 23137 23516 23537 23375 23352 23353 23245 23727 23405 23415 23379 23253 23574 23412 23277 23524 23255 23532 23152 23314 23648 23487 23377 23480 23140 23698 23186 23355 23472 23208 23525 23293 23223 23655 23823 23461 23418 23236 23636 23161 23364 23336 23552 23352 23440 23364 23596 23138 23631 23270 23552 23335 23396 23363 23602 23244 23594 23315 23463 23456 23303 23503 23503 23089 23591 23178 23449 23360 23335 23352 23620 23276 23686 23190 23523 23382 23389 23350 23601 23671 23676 23148 23594 23375 23387 23372 23610 23118 23707 23201 23546 23292 23377 23286 23605 23194 23602 23269 23492 23357 23490 23212 23636 23048 23655 23351 23368 23337 23542 23158 23662 23078 23535 23251 23468 18836 22436 22134 22736 22469 22614 22428 22902 22411 22970 24201 23920 23443 23605 23278 23744 23029 23751 23288 23474 23355 23684 22985 23712 23305 23597 23413 23594 23261 23629 23208 23595 23335 23493 23260 23621 23064 23698 23253 23493 23325 23646 23136 23780 23111 23607 23205 23552 23104 23669 23072 23553 23213 23439 23125 23687 23059 23511 23328 23382 23168 23680 23360 23555 23330 23492 23169 23596 23014 23545 23127 23509 23088 23561 23096 23581 23111 23438 23190 23476 23078 23624 23053 23519 23283 23433 23106 23598 23075 23540 23137 23467 23232 23363 23240 23593 23324 23510 23175 23444 23204 23477 23287 23541 23065 23472 23288 23464 23264 23426 23216 23510 23096 23420 23190 23461 23263 23333 23316 23370 23366 23417 23262 23518 23237 23414 23296 23432 23200 23437 23024 23474 23335 23625 23172 23344 23300 23350 23400 23438 23305 23585 23209 23287 23498 23462 23111 23573 23232 23247 23517 23429 23136 23605 23232 23221 23472 23386 23126 23584 23247 23216 23566 23316 23031 23681 23144 23243 23383 23271 23328 23412 23160 23687 23289 23255 23562 23205 23253 23473 23145 23554 23266 23223 23528 23312 23082 23608 23163 23150 23581 23277 23205 23627 23255 23239 23529 23248 23112 23561 23496 23002 23388 23367 23368 23346 23462 23219 23619 23289 23541 23361 23266 23292 23471 23104 23545 23246 23348 23451 23379 23285 23523 23185 23552 23322 23325 23482 23382 23285 23586 23110 23498 23396 23364 23274 23437 23257 23607 23043 23588 23232 23556 23325 23276 23346 23579 23087 23628 23029 23546 23259 23412 23318 23240 23330 23623 23079 23554 23150 23599 23296 23392 23278 23565 23273 23610 23136 23592 22912 23643 23237 23341 23336 23623 23178 23592 23244 23652 23027 23630 23161 23563 23267 23424 23242 23478 23240 23543 23220 23683 22977 23702 23048 23696 23067 23634 23137 23560 23232 23344 23281 23537 23249 23516 23258 23582 23193 23608 23075 23675 23080 23595 23023 23719 23099 23570 23200 23624 23204 23470 23281 23448 23092 23474 23153 23860 23114 23541 23158 23474 23212 23484 23187 23497 23057 23562 23217 23450 23229 23654 23093 23529 23220 23553 23111 23557 23033 23526 23141 23484 23005 23535 23145 23000 23216 23397 23186 23467 23186 23451 23221 23481 23111 23445 23220 23459 23249 23371 23177 23457 23200 23413 23249 23436 23299 23420 23282 23401 23209 23377 23300 23399 23288 23836 23315 23468 23229 23332 23150 23366 23128 23377 23162 23438 23190 23530 23164 23589 23168 23597 23178 23524 23125 23493 23209 23431 23002 23432 23048 2562 13539 15895 16695 17335 17283 17538 17684 17978 17888 31004 26935 26055 25124 25116 24472 24637 24218 24352 24102 24149 24201 24074 24169 24032 23959 23708 14375 18589 19130 19841 19616 20173 19883 20178 20160 20226 27861 25671 25347 24604 24504 24402 24214 24405 23956 24367 23708 24041 23824 23988 24016 23725 24053 18581 20145 20945 20844 21389 21047 21396 21485 21360 33793 25536 24972 24320 24471 24064 24123 24071 24091 23824 24126 23561 24103 23673 23893 23794 23813 23831 20810 21472 22021 21654 22229 21999 22027 22127 22084 27032 24824 24160 24248 23722 24030 23875 23777 23826 23855 23593 24016 23384 24022 23581 23907 23573 19292 22247 22797 22558 22860 22763 22739 22628 22939 22272 24922 23696 24004 23700 23797 23546 23971 23366 23898 23479 23327 23528 23673 23395 23848 23240 23813 23517 23668 23526 23831 22767 23834 23362 23704 23452 23676 23345 23852 23220 23782 23439 23606 23384 23792 23143 23829 23400 23618 23392 23856 23290 23876 23448 23680 23447 23786 23264 23846 23371 23692 23488 23587 23396 23761 23155 23788 23404 23739 23421 23733 23257 23801 23126 23712 23291 23735 23198 23751 23159 23708 23329 23676 23186 23767 23367 23648 23332 23351 23248 23688 23273 23594 23268 23591 23450 23479 23186 23717 23176 23634 23261 23607 23222 23616 23127 23702 23160 23546 23278 23526 23298 23453 23239 23580 23202 23575 23178 23524 23320 23387 23274 23515 23255 23607 23084 23575 23269 23539 23384 23489 23286 23453 23269 23576 23266 23660 23112 23557 23325 23473 23353 22833 23283 23428 23288 23620 23172 23662 23233 23541 23181 23501 23421 23492 23271 23404 23290 23607 23182 23584 23611 23552 23152 23426 23296 23481 23365 23476 23333 23462 23469 23446 23345 23399 23321 23455 23223 23472 23147 23469 23223 23481 23256 23563 23270 23597 23436 23693 23243 23722 23208 23594 23220 23562 23293 23607 23311 23328 23292 23405 23267 23556 23381 23630 23328 23631 23272 23648 23279 23627 23207 23640 23229 23692 23345 23717 23255 23648 23330 23529 23369 23386 23252 23404 23284 23342 23527 23425 23495 23362 23551 23416 23502 23451 23511 23411 23527 23484 23496 23436 23784 23445 23362 23361 23264 23426 23324 23405 23303 23399 23421 23465 23453 23415 23492 23245 23672 23210 23648 23137 23623 23146 23558 23255 23592 23331 23553 23300 23517 23317 23351 23337 23528 23343 23641 23214 23626 22433 23701 23001 23703 23118 23668 23262 23601 23331 23379 23366 23404 23350 23520 23265 23612 23168 23692 22994 23676 22987 23743 23129 23658 23256 23545 23271 23488 23306 23545 23241 23635 23330 23653 22998 23700 23230 23572 23317 23451 23344 23439 23325 23601 23211 23681 23111 23724 23043 23672 23169 23555 23114 23452 23141 23588 23141 23639 23031 23713 23161 23582 23212 23491 23278 23518 23159 23575 23168 23559 23252 23610 22709 23533 23122 23606 23162 23593 23220 23457 23177 23417 23212 23517 23109 23571 23118 23592 23095 23493 23128 23511 23227 23427 23188 23523 23202 23507 23201 23570 23134 23540 23215 23471 23224 23457 23304 23358 23271 23418 23272 23521 23209 23448 23289 23456 23213 23424 23282 23439 23245 10595 14583 16637 16707 17400 17330 17844 17807 18002 43228 28801 26217 25767 24932 25091 15439 19062 19413 19945 20091 20199 20201 20404 20298 20622 27986 26105 25078 25017 24689 13839 20215 20898 21181 21549 21245 21670 21286 21669 21620 27253 25510 24682 24455 24689 24183 21332 21571 22036 22137 22048 22368 21995 22144 22372 27578 25201 24176 24163 24072 23959 22307 22798 22784 22885 22724 23129 22785 22900 22872 22794 24541 23844 23816 23981 23580 23940 23583 23924 23656 23657 23929 23462 23900 23715 23898 23644 23801 23534 23866 23383 23912 23676 23417 23704 23718 23486 23859 23389 23782 23606 23523 23656 23660 23526 23837 23303 23848 23565 23540 23633 23682 23356 23819 23300 23796 23429 23739 23530 23727 23767 23853 23403 23670 23481 23637 23439 23856 23129 23793 23433 23714 23520 23595 23424 23745 23225 23831 23430 23660 23417 23753 23651 23849 23335 23629 23445 23624 23399 23843 23127 23815 23424 23544 23415 23718 23218 23881 23264 24106 23328 23683 23202 23824 23186 23704 23387 23660 23249 23778 23225 23639 23412 23613 23334 23745 23117 23730 23340 23477 23375 23799 23091 23819 23375 
23192 23358 23224 23367 23168 23192 23057 23048 23321 23054 23424 22957 23456 23020 23703 23319 23334 22777 23264 23271 23277 23219 23228 23296 23171 23338 23141 23401 23196 23483 23210 23424 22912 23428 22971 23312 23029 23417 23112 23505 23221 23483 23185 23329 23241 23155 23171 23164 23157 23152 23296 23201 23168 23376 22955 23488 22992 23504 22967 23502 22775 23448 22847 23588 22798 23536 22950 23496 22841 23585 23115 23444 22947 23498 23014 23389 22928 23316 22994 23498 22846 23536 22769 23607 23005 23399 23112 23241 22976 23475 22715 23612 23029 23197 23105 23639 22836 23371 22962 23616 22749 23311 22939 23688 22963 23259 22784 23649 23072 23392 22539 23400 23055 23565 22871 23407 23081 23552 22939 23313 22931 23607 23008 23355 22799 23656 23052 23552 22688 23524 22722 23407 22694 23569 22805 23430 22662 23581 22758 23263 22632 23520 22774 23487 22748 23422 22744 23229 22727 23456 22833 23483 22653 23410 22683 23442 22650 23479 22627 23373 22686 23527 22722 23824 22784 23500 22641 23328 22840 23397 22703 23416 22705 23336 22682 23376 22770 23242 22860 23291 22803 23329 22822 23283 22688 23475 88 2435 3816 5793 6253 7549 7816 43656 43690 39729 35009 32489 30252 29332 27792 27353 26324 26385 25633 25767 24996 25121 24553 24797 24308 24616 24196 24185 24016 24066 23744 24310 23927 23836 23767 23931 23583 23914 23709 23752 23120 23705 23411 23810 23667 23628 23154 23393 23296 23669 23660 23827 23132 23441 23045 23608 23506 23829 23281 23269 22977 23367 23271 23777 23207 23299 22967 23416 23325 23692 23258 23431 22996 23301 23460 23640 22999 22966 23486 23319 23562 23180 23282 22952 23458 23371 23516 23145 23178 23021 23544 23322 23372 23178 23040 23212 23410 23324 23448 23091 23177 23141 23511 23255 23484 22983 23176 22999 23595 23149 23462 22958 23246 23033 23537 23270 23387 22865 23223 23086 23706 23113 23347 22934 23296 23153 23531 23137 23398 22784 23525 23166 23570 23036 23170 23335 23536 23095 23604 22901 23224 22967 23600 23081 23581 22894 23346 22949 23570 23021 23675 22797 23265 23178 23693 22936 23584 22836 23320 22813 23648 23056 23568 22810 23312 22904 23607 23006 23447 22669 23072 23004 23742 22925 23470 22521 23619 22966 23738 22956 23478 22887 23545 22759 23498 22784 23408 22813 23493 105 1889 5802 8901 10042 11868 12122 13440 13370 43776 43680 38080 33337 31465 28715 28231 26728 26838 25661 25900 25261 25374 24380 25026 24148 24716 23910 24403 23672 24387 23756 24245 23495 23980 23544 23951 23536 23955 23205 23833 23336 23859 23328 23730 23434 23696 23271 23829 23187 23513 23269 23587 23122 23813 23232 23607 22981 23648 23194 23831 23049 23110 23104 23635 23346 23452 23152 23396 23220 23682 23204 23175 23007 23490 23368 23500 22933 23325 23057 23591 23147 23319 22893 23410 23488 23319 22961 23288 23327 23662 22865 23275 23003 23752 23162 23329 22888 23475 23408 23239 22969 23326 23440 23337 22919 23271 23400 23323 22999 23298 23500 23299 22960 23252 23239 22926 23474 23328 23469 22998 23460 23239 23430 22904 23413 23260 23315 22971 23415 23248 23213 22958 23437 23198 23106 23153 23455 23139 23416 23288 23428 22790 23424 23228 23252 22976 23503 23160 23168 23063 23568 22951 23361 23218 23356 23046 23506 23040 23174 23143 23286 23112 23531 22971 23554 22865 23485 22813 23543 22832 23511 22833 23595 22700 23488 23015 23356 23082 23201 23034 23541 22806 23623 22855 23456 23000 23505 22864 23570 22902 23328 123 6226 9546 12792 14001 15741 15869 16847 16932 18037 41411 35211 30969 29530 27324 26644 25723 25984 24823 24934 24288 24860 24003 24381 23871 24419 23528 24160 23516 24065 23355 24032 23406 23959 23422 23916 23342 23751 23186 23837 23140 23680 23310 23619 23304 23769 22998 23633 23066 23709 22908 23621 22934 23608 23009 23571 22879 23750 22876 23488 22976 23654 22832 23627 22905 23579 22996 23509 23157 23448 23009 23441 22838 23579 22945 23547 23029 23436 23101 23381 22989 23472 22927 23499 22766 23525 22827 23550 22839 23451 22921 23301 22960 23634 23059 23323 23043 23381 22960 23324 23009 23469 22834 23363 22676 23424 22820 23553 22932 23530 22965 23596 22912 23705 22809 23605 22914 23320 23004 23344 22904 23432 22942 23478 22950 23552 22925 23563 22918 23493 22964 23528 22659 23575 22849 23301 22835 23229 22821 23372 23069 23189 23112 23140 23252 23105 23285 23179 22967 23101 22959 23386 22840 23464 22896 23626 22876 23303 22900 23292 23136 23065 23305 22775 23179 23078 23009 23380 22854 23698 22895 23264 22866 23431 23136 23092 23408 22846 23448 23072 23428 23171 23121 23191 23236 23210 23245 23033 23441 23012 23353 23030 9449 13745 15719 17238 17955 18498 19202 19046 19716 37808 32247 28857 27173 26019 25453 24859 24976 23918 24520 23846 24170 23825 23788 23728 23896 23360 24016 23272 23865 23317 23627 23463 23502 23316 23738 23040 23772 23018 23680 23273 23478 23331 23591 23077 23629 22938 23715 23049 23524 23201 23433 23051 23600 22856 23687 22941 23444 23172 23228 23191 23445 23024 23680 22706 23730 22992 23530 23040 23415 22985 23721 22711 23774 22814 23555 23020 23329 23033 23439 22835 23619 22842 23694 23023 23169 22981 23329 22982 23564 22672 23674 22894 23490 23044 23328 22998 23569 23158 23644 22709 23674 22829 23526 22792 23481 22750 23517 22740 23428 22950 23373 22826 23336 22784 23611 22664 23492 22812 23427 22906 23267 22874 23401 22667 23528 22811 23374 22745 23301 22840 23544 22632 23362 22820 23424 22774 23474 22676 23539 22724 23435 22858 23267 22928 23283 22741 23536 22925 23332 22865 23214 22964 23225 22873 23409 22785 23315 22771 23319 22930 23368 22837 23479 23108 23435 22797 23365 22932 23177 22784 23445 22660 23377 22957 23223 22840 23338 22866 23441 22749 23374 22914 23105 22889 23415 22812 23428 22712 23143 22923 23229 14086 17936 18688 19889 20342 20686 20720 21300 21376 21517 28408 26400 25184 24469 24010 24327 23502 23821 23641 23601 23239 23909 23201 23483 23496 23510 23159 23684 22955 23544 23195 23172 23433 23145 22996 23752 22868 23340 23416 23176 23102 23360 22920 23448 22978 23182 23301 23176 22936 23628 22752 23259 23434 23141 22938 23559 23109 23160 23277 23344 23175 22993 23452 23241 23168 23019 23473 22948 23313 23219 23202 22977 23433 22869 23351 23241 23015 23130 23336 22873 23347 23200 22919 23249 23248 22797 23360 22964 23285 23153 23024 23284 23328 22949 23379 23040 23276 23079 23161 23068 23455 22800 23380 23107 23319 23077 23313 22994 23375 22805 23488 23096 23522 23041 23114 23182 23176 22981 23393 22947 23401 22971 23326 22927 23399 23008 23335 23047 23129 23080 23244 23083 23262 22880 23475 22679 23554 22873 23324 22946 23357 22875 23564 22747 23415 22992 23285 22857 23616 22684 23505 22968 23444 22787 23689 22629 23448 22930 23386 22822 23629 22822 23465 22989 23424 22887 23521 22594 23504 22957 23239 22946 23319 22813 23504 22673 23568 23090 23132 22917 23489 22650 23653 22717 23367 22754 23563 22801 23373 22448 23579 22689 23216 22824 23351 22587 23445 22856 23509 22821 23458 22752 23429 22756 23209 22887 23309 22706 23381 22675 23416 22718 23180 22836 23363 22536 23461 22721 23333 22728 23321 22797 23355 22937 23592 22752 23276 22804 23321 22823 23272 22695 23463 22774 23168 22931 23305 22852 23303 22808 23463 22824 23307 22813 23247 22840 23299 22800 23380 22828 23393 22756 23193 22834 23241 22983 23373 22625 23330 22681 23385 22777 23187 22809 23269 22839 23367 22670 23325 22643 23402 22759 23264 22889 23301 22829 23339 22681 23376 22764 23571 22817 23278 22874 23067 23008 23536 23029 23177 22928 23296 22691 23302 22693 23489 22876 23319 22905 23117 22950 23024 23024 23670 23280 22992 23152 23064 22882 23122 22696 23328 22862 23473 22692 23535 22631 23379 22712 23246 22886 23079 22903 22996 23031 23222 23261 22960 23210 22949 23122 23018 22958 23022 22809 23184 22622 23360 22668 23355 23092 23143 23315 23095 23371 22928 23424 22816 23446 22685 23330 22733 23360 23161 23328 23045 23246 23005 23109 23092 23164 23136 23127 23130 23022 23176 23072 23184 23159 23076 23046 23257 23068 23145 23115 23013 23211 23084 23224 22951 23276 22982 23301 22887 23347 22931 23405 22893 23260 22744 23367 22690 23382 22746 23490 22712 23436 22727 23392 22795 23461 22785 23333 23068 23339 22896 23705 23089 23176 22941 23212 111 91 86 2821 4421 6585 6892 8655 8519 9936 43673 43680 39643 35770 32423 30746 29098 28391 27267 27009 26085 26270 25312 25767 24774 25407 24509 110 1679 7452 9417 11813 12570 13819 14219 14936 43622 43685 39052 35031 31720 30360 28077 28234 26564 26776 25676 26048 25070 25500 24597 25197 24338 24935 3605 9809 12350 14775 15603 17101 16944 18145 17671 43668 37105 33249 29896 28762 27229 26699 25748 26093 24928 25622 24416 25137 24256 24821 24209 24675 5866 11831 14505 17163 17392 18973 18841 19849 19423 20285 36136 31722 28391 27524 26113 26019 25107 25072 24497 24931 24248 24690 23914 24520 23962 24015 23799 15374 17722 19717 19978 20960 20880 21450 21050 21862 21562 29116 26529 25938 24933 24865 24176 24789 23879 24372 23800 24218 23735 24091 23526 24098 23429 23975 23599 23669 23520 24071 23399 23816 23367 23737 23503 23524 23335 23862 23229 23676 23597 23392 23311 23964 23031 23574 23735 23351 23164 23972 23100 23566 23584 23316 23312 23879 22995 23488 23360 23408 23419 23363 23208 23799 23058 23555 23536 23213 23340 23574 23028 23597 23083 23276 23467 23278 23112 23812 22928 23356 23460 23258 23063 23713 23307 23330 23328 23211 23368 22901 23510 23304 23205 23364 23416 22883 23607 23114 23390 23273 23342 23247 23571 23013 23608 23155 23249 23392 23180 23409 23413 23107 23541 23083 23379 23180 23094 23248 23357 23123 23509 22935 23555 23132 23328 23241 23299 23239 23533 23552 23575 22843 23581 23087 23517 23233 23342 23251 23299 23088 23494 22956 23609 22792 23652 22887 23659 23089 23540 23156 23315 23156 23530 22955 23614 22757 23634 22904 23566 23016 23436 23076 23323 23107 23337 23153 23460 23124 23389 23028 23356 23055 23379 23068 23355 23003 23370 23016 23432 22899 23402 22967 23592 23015 23444 23041 23436 22888 23538 22845 23603 22848 23591 22792 23582 22766 23522 22633 23542 22692 23592 22702 23642 22693 23703 22743 23486 22772 23469 22841 23475 22848 23435 22881 23382 22790 23346 22873 23356 22871 23334 22909 23330 23015 23368 22856 23260 22929 23414 22920 23319 22935 23305 22768 23330 22832 23418 22853 23399 22824 23393 22844 23296 22832 23233 22842 23500 22787 23150 22900 23248 22838 23322 22818 23411 22816 23484 22777 23477 23185 23369 22769 23363 22759 23338 22906 23133 22851 23387 22950 23271 22820 23195 22875 23464 22822 23435 22784 23402 22589 23223 22743 23304 22788 23255 22893 23128 23058 23123 22904 23149 22988 23335 22784 23530 22683 23301 22778 23250 22825 23309 23069 23088 23186 23270 22983 23103 22829 23559 22788 23374 22640 23227 23104 23005 23108 23521 23139 22935 22915 23386 22854 23559 23241 23306 22876 23184 23213 23079 23281 23030 22920 23112 22801 23297 22867 23496 22874 23247 22725 23088 23219 22928 23280 22805 23311 22928 23424 23015 23297 23136 22997 23101 23108 23127 23189 23069 23216 22899 23315 22803 23326 23000 23153 23154 23018 23292 22948 23180 23089 23070 23286 23319 23396 22754 23412 22970 23272 23050 23239 23068 23008 23140 23145 22977 23336 22889 23515 22823 23339 23079 23273 23047 23049 22957 23224 22877 23320 69 85 442 4203 5701 7252 8184 9117 9398 43648 43556 43680 37229 34397 31425 0 5988 10005 11808 13792 14145 15460 15144 16432 43621 43680 40376 35852 32521 30923 3422 10647 13198 16231 16637 18222 18118 18959 18931 19517 42160 36378 31874 30663 28596 10975 13608 16859 18176 19341 19584 20508 19957 21024 20355 37888 32121 29827 28113 27553 26456 18972 19935 21591 21023 22135 21628 22306 21769 22408 30897 28928 26604 26528 25450 25681 24960 25274 24500 25079 24336 24786 24214 24677 24093 24564 23835 24513 23635 24613 23438 24364 23560 24187 23476 24263 23304 24204 23297 24139 23461 24058 23329 24018 23360 23985 23299 23889 23425 23139 23307 23848 23250 23896 23157 23787 23373 23756 23353 23760 23194 23797 23245 23653 23302 23632 23164 23869 23204 23646 23264 23638 23101 23643 23132 23716 23020 23635 23171 23719 23123 23680 23040 23644 23055 23527 23209 23432 23062 23734 23055 23521 23389 23552 23211 23608 22976 23496 23168 23321 23168 23322 23041 23638 23138 23424 23312 23376 22958 23566 22933 23189 23441 23321 23078 23691 22976 23288 23427 23344 22998 23620 22874 23329 23361 
