# Supplementary material for: An Active Feature Selection Strategy for DWT in Artificial Taste
Source: Hindawi journal article supplement (doi:10.1155/2018/9709505), 2018-01-01
Supplement: f1 [file 9709505.f1.zip › redWine-med-3.txt]

43446 43456 43465 43444 55 10862 18628 20578 22213 22714 22900 23018 23565 23634 23522 23454 23977 23914 23745 23723 24272 23616 23996 24026 24100 23770 24206 24011 24084 24194 24147 23863 24402 23770 24199 24408 24064 24047 24290 23925 24490 23930 24091 24077 24053 24361 24488 24119 24032 24044 24427 23961 24602 23971 24477 23798 24279 23937 24138 24234 24256 24077 24183 24368 23964 24448 24064 24443 23860 24515 23771 24570 23907 24511 23982 24405 24070 24367 24237 24371 24208 24231 24201 24150 24142 24314 24229 24408 23983 24492 23990 24502 24000 24477 23831 24658 23863 24593 23883 24492 24088 24385 24124 24412 24178 24134 24156 24325 24031 24567 24001 24579 23844 24692 24020 24512 24000 24224 24032 24390 23984 24608 23760 24694 24025 24501 24017 24339 23939 24566 23746 24682 24011 24566 24085 24678 23893 24679 23952 24462 23926 24473 23831 24614 23745 24612 24002 24498 23800 24697 23820 24497 23974 24439 23857 24624 23863 24534 24110 24562 23721 24678 24000 24186 23952 24576 23684 24566 24006 24577 23857 24695 23968 24456 23838 24656 23785 24474 23861 24594 23291 24480 23912 24368 4286 18692 20280 21596 21430 22276 21825 22515 22060 22692 32742 27353 25401 25497 24437 24935 24236 24806 24000 24740 24103 24592 23950 24688 24108 24567 24111 24653 24092 24464 23926 24659 23927 24407 23971 24609 23984 24514 23976 24640 23847 24400 24098 24609 24017 24348 24019 24585 24002 24388 23914 24576 23926 24481 23970 24512 23904 24388 24040 24534 23828 24391 24039 24576 23832 24298 24014 24450 23732 24336 24066 24408 23924 24344 24096 24477 24053 24261 23960 24404 24217 24199 24054 24420 24249 24347 24096 24275 24215 24489 23862 24364 24081 24550 24056 24315 24064 24435 24178 24077 23959 24316 24440 24369 23798 24215 24071 24689 24128 24042 23957 24313 24385 24181 23970 24257 24329 24576 23938 24045 24180 24434 24344 24009 23911 24270 24400 24424 23919 24064 24265 24490 24244 23905 24247 24332 24185 24098 24220 24090 24537 24180 24384 23804 24494 24143 24526 24041 24254 24049 24502 24245 24322 23865 24357 24284 24371 24171 24259 24097 24477 24258 24449 23925 24377 24301 24428 24069 24308 24517 24501 24076 24589 24014 24408 23941 24601 24085 24580 23824 24450 24269 24512 24077 24271 24004 24530 24025 24555 23709 24250 23979 19892 21776 22791 22327 23243 22880 23424 22898 23225 36499 27208 25195 25352 24283 25012 24316 24967 24305 24704 24087 24720 24245 24826 24044 24449 23943 24854 24055 24791 23858 24408 24008 24737 24055 24449 23793 24677 24192 24705 24027 24304 23893 24629 24000 24698 23938 24369 23956 24741 24072 24592 23671 24601 23906 24712 23975 24475 23704 24487 23813 24606 24020 24322 23798 24553 23952 24744 23838 24279 23797 24373 24016 24473 23670 24354 23833 24559 24052 24430 23919 24524 23840 24608 23910 24398 23139 24470 23756 24529 23997 24363 23877 24442 23847 24492 24039 24323 23879 24345 23968 24406 24119 24326 23848 24316 23927 24553 24047 24260 23881 24419 24012 24456 23996 24226 23941 24384 23976 24454 23972 24458 23842 24401 24017 24560 23931 24092 23954 24448 24040 24565 23816 24192 24069 24452 24076 24186 23952 24439 24058 24496 24004 24302 23977 24419 24227 24272 23774 24313 24108 24502 23985 24080 24121 24297 24347 24328 23946 24228 24022 24535 24186 24041 23938 24329 24259 24533 23921 24133 24087 24417 24374 24188 24257 24178 24156 24538 23950 24199 24098 24294 24407 24192 24050 24100 24178 24499 24370 24046 23954 24272 18419 22489 22720 23209 23502 23316 23381 23159 23831 23388 26958 25092 24972 24086 24808 24360 24432 24404 24529 24194 24520 24039 24549 23946 24476 24013 24476 23864 24477 24064 24520 24072 24417 24253 24209 24256 24482 23707 24521 24158 24477 23913 24459 24065 24565 24118 24647 24248 24673 24187 24536 24117 24605 24198 24561 24168 24483 23780 24280 23268 24542 24179 24712 24100 24674 24001 24507 23695 24216 23937 24576 23978 24632 24001 24342 23774 24546 24183 24616 24071 24576 23649 24461 23888 24711 24088 24672 24000 24577 23831 24599 24006 24836 24025 24596 23672 24548 24090 24680 24074 24416 24037 24599 24033 24576 23800 24357 23975 24706 24044 24428 23847 24611 23978 24711 23781 24634 23738 24549 23987 24660 23700 24439 23861 24475 23861 24576 23776 24421 23792 24506 23920 24464 23988 24540 23840 24338 23929 24475 23825 24488 23628 24569 23852 24664 23927 24594 23830 24434 23632 24386 23768 24442 23692 24392 23752 24409 23820 24172 23719 24280 23892 24525 24075 24569 24000 24448 23973 24352 23932 24379 23953 24197 23788 24365 24096 24441 23904 24413 24026 24323 24368 24273 24032 24416 23974 24353 23898 24140 23814 24402 24080 22576 22968 23616 23221 23941 23460 23762 23428 23611 27981 25185 24404 24619 24165 24665 24108 24260 23936 24472 24240 24257 24052 24394 24246 24329 23879 24541 24232 24130 23897 24514 24176 24012 23911 24576 24096 24088 24243 24388 23995 24084 24423 24264 23904 24529 24096 24220 24388 24197 24229 24449 24154 24517 24286 24233 24050 24388 24180 24122 24039 24235 24345 24206 24544 23689 24560 23945 24256 24106 24310 24103 24504 23850 24401 24096 24280 24194 24231 24185 24454 23940 24457 24004 24475 24056 24377 24197 24208 24007 23687 24136 24492 23905 24581 23797 24567 23888 24526 24000 24495 24001 24214 24097 24248 24044 24384 23949 24545 23907 24613 23692 24527 23713 24588 23900 24529 23930 24454 24018 24330 23970 24279 23975 24394 23980 24487 23991 24496 23965 24480 23890 24576 23829 24712 23750 24697 23815 24700 23852 24657 23752 24698 23687 24584 23694 24553 23645 24615 23858 24665 23713 24605 23621 24674 23788 24552 23606 24581 23913 24564 23715 24491 23636 24416 23730 24412 23716 24465 23846 24425 23832 24456 23669 24367 23772 24499 23814 24448 23801 24557 23906 24488 23953 24392 23949 24435 23972 24391 23940 24264 23920 22552 23399 23865 23607 24020 23649 24087 23627 24105 23536 25063 24055 24515 23964 24360 23812 24372 23912 24309 24073 24295 24114 24514 23921 24185 23908 24320 24015 24544 23901 24519 24000 24311 23795 24220 23840 24444 24152 24244 24258 24306 24118 23952 24130 24331 23936 24479 24087 24417 23939 24295 23768 24263 24019 24192 24344 24046 24397 23876 24408 23974 23984 24254 24006 24397 23909 24544 23936 24514 23914 24329 23843 24189 24144 24136 24414 24032 24370 23916 24412 23922 24528 24015 24457 23995 24294 24155 24253 24156 24423 23962 24512 23747 24425 24084 24417 24046 24397 24175 24144 24227 24182 24088 24454 24199 24562 23718 24588 23938 24375 24022 24276 24085 24269 24169 24217 24199 24331 24232 24295 24108 24224 24029 24240 24013 24235 23960 24481 23974 24527 23898 24655 23686 24631 23875 24605 24064 24369 24037 24457 23962 24691 23626 24672 23909 24424 23875 24535 23771 24542 24215 24497 23983 24283 24051 24668 23684 24615 23842 24360 23956 24370 23911 24652 23785 24673 23776 24452 23741 24367 23868 24439 23688 24577 23815 24215 23945 24509 23776 24465 23884 24324 24129 24528 23827 24513 23776 24485 23614 24418 23793 24517 23879 24442 23782 24437 23861 24455 23831 24336 23869 24489 23972 24369 23801 24321 23875 24503 24033 24189 23790 24413 24000 24496 23735 24263 23866 24384 24064 24429 23794 24327 23853 24360 23909 24458 24092 24365 23860 24072 23814 24281 23927 24211 24032 24363 24044 24220 23987 24328 24020 24295 24156 24284 24070 24327 24202 24242 24043 24272 24060 24201 23928 24032 23915 24000 23905 23945 24010 24379 24400 24477 24169 24203 23976 24032 24162 24073 24098 24439 24300 24293 24097 24067 24070 23945 24260 24519 24172 24338 24541 23992 24119 24001 24503 24168 24464 23798 24128 23960 24405 24198 24352 23920 24181 24153 24355 24150 24486 23886 24460 24200 24549 23991 24188 24076 24523 24121 24370 23733 24506 24090 24631 24103 24331 24192 24594 24006 24147 24068 24503 24086 24245 23873 24565 24010 24817 23779 24576 24026 24480 23858 24616 24057 24518 23945 24617 23976 24260 23943 24653 23780 24451 23880 24567 23549 24585 23979 24936 23779 24613 23957 24194 23984 24569 23859 24514 24008 24491 23808 24676 24040 24306 23929 24672 23667 24580 23776 24484 23812 24477 23776 24312 23936 24480 23740 24590 23914 24272 23956 24312 23683 24529 23809 24565 24002 24528 23920 24601 23808 24256 23944 24386 23567 24444 23708 24256 23975 24420 23765 24486 23877 24358 23976 24334 23842 24315 23808 24451 23972 14994 20240 21879 21577 22373 21888 22624 22186 22584 43444 29937 25728 25513 24590 24861 24407 24567 24294 24628 23977 24773 24154 24256 24360 24320 24293 24450 19315 22560 22497 23074 22912 22876 23090 23141 23301 37453 26361 25473 24567 24901 24385 24433 24685 24301 24477 24432 24049 24529 24076 24705 24161 24204 4396 21749 23191 23065 23421 23362 23250 23703 23271 23667 29402 25344 25184 24266 24821 24096 24787 24194 24524 24439 24396 24384 24217 24244 24441 24279 24554 18323 23312 23061 23801 23368 23956 23482 24046 23697 23996 26112 24930 24475 24513 24379 24560 24369 24462 24308 24597 24115 24674 23960 24668 23873 24636 23824 22993 23206 24268 23496 24270 23514 24427 23501 24454 23531 25298 23959 24807 23756 24778 23748 24778 23854 24773 23624 24761 23623 24710 23695 24692 23788 24675 23726 24647 23687 24616 23760 24692 23723 24685 23837 24737 23894 24722 24048 24583 23995 24407 23976 24454 24064 24496 24027 24437 23891 24183 23893 24335 23896 24452 23832 24615 23780 24562 23737 24648 23761 24585 23809 24410 23729 24508 23920 24434 24006 24301 24056 24374 23959 24167 23972 24423 23880 24500 23867 24513 23941 24358 23908 24307 24124 24390 24083 24279 24177 24236 24112 24404 24004 24226 24076 24295 23956 24533 23880 24519 23922 24425 23812 24326 24216 24224 24312 24187 24088 24165 24120 24395 23983 24512 23822 24222 23898 24125 24393 24025 24271 24018 24006 24211 23974 24556 23949 24500 23909 24206 24080 24173 24352 24072 24366 23975 24132 23961 24459 24158 24421 24069 24190 24160 24276 24041 24532 23953 24365 23912 24485 24213 24294 24086 24162 24216 24360 24155 24438 23840 24532 23755 24562 23874 24475 24100 24142 24054 24165 24206 24460 24041 24576 24418 24551 23718 24622 23946 24458 24032 24294 24007 24297 24121 24599 23840 24627 23675 24717 23829 24637 23919 24420 23971 24471 23968 24510 23937 24609 23840 24576 23699 24564 23585 24711 23919 24509 24052 24536 23906 24184 24032 24537 24018 24621 23856 24675 23836 24416 23611 24532 23977 24428 24041 24748 23856 24371 23816 24490 23840 24536 23810 24592 23884 24482 23780 24496 23767 24512 23686 24523 23766 24564 23767 24614 23853 24483 23899 24096 23931 24147 24087 24400 23765 24396 23891 24174 24052 24332 23843 24545 23868 24277 23847 24561 23918 24251 23875 24548 23926 24261 23982 24304 23787 24176 24181 24180 23772 24439 23990 24110 24313 24309 23768 24440 24001 23980 24361 24169 23943 24364 23933 24327 24216 24045 24395 24070 24014 24295 24066 24538 24022 23944 24157 24344 24395 24096 24122 24258 23847 24423 23948 24448 24417 24007 24463 23824 24455 23661 24519 24023 24394 24081 24229 24171 24095 24263 24000 24167 24064 24054 24343 24188 24275 24059 24452 24085 24278 24103 24357 24096 24184 24054 24128 24023 24192 24125 24359 24162 24404 24039 24512 23939 24423 23924 24594 23914 24628 23915 24611 23700 24576 23608 24628 23608 24649 23831 24583 23920 24518 23940 24868 24040 24282 23991 24341 24000 24512 23943 24608 23691 24613 23652 24704 23790 24368 23952 24582 23696 24353 23831 24647 23767 24535 23689 24409 23885 53 18854 21562 21538 22413 21893 22820 21653 22837 22158 35136 27065 25462 24605 24753 24236 20401 21752 22973 22837 23229 22850 23344 22871 23508 37687 27108 25176 25340 24416 24660 19023 22967 22742 23504 23379 23569 23372 23936 23320 23613 26521 25051 24629 24750 24309 17831 22640 23482 23672 23512 23621 24128 23488 23747 23946 26268 24656 24992 24281 24405 24668 23184 23701 24277 23612 23897 24176 23854 23717 24223 26101 24567 24517 24237 24556 24286 24528 24039 24732 24160 24392 24264 24552 23984 24505 24240 24416 24050 24533 24148 24170 24167 24541 23833 24561 24148 24474 24007 24707 24153 24197 24128 24587 23951 24409 24064 24429 24009 24631 24088 24296 23958 24636 23956 24513 24051 24594 23730 24422 23993 24533 23657 24684 23981 24567 24252 24763 24001 24390 23920 24654 24056 24201 23996 24594 23886 24542 24056 24683 23600 24452 23746 24603 23685 24389 23745 24490 23738 24455 23853 24397 23908 24506 23996 24406 23717 24485 23903 24409 23760 24454 23946 24464 23800 24389 23984 24255 23891 24378 24002 24167 23944 24425 24017 24187 23912 24288 24034 24336 23863 24335 24099 24225 23930 
20802 21344 20860 21404 20689 21302 20923 21278 20779 21558 20487 21666 20756 21565 20794 21392 20645 21559 20555 21504 20760 21293 20959 21381 21076 21633 20661 21466 20907 21305 20629 21649 20583 21473 20768 21220 20631 20934 20048 21011 20145 20997 20290 20792 20256 20964 20103 21052 19961 20886 20126 20907 20183 20774 20257 20871 20249 20834 20173 20898 20327 21009 20314 20919 20196 20931 20217 21136 20213 21027 20048 20999 20099 21014 20141 20986 20361 21052 20341 20911 20406 21082 20305 20900 20313 20849 20261 21045 20336 21100 20282 21090 20326 21062 20286 20951 20308 20897 20345 20912 20580 20853 20531 20281 20547 20794 20437 20812 20435 21064 20311 21137 20288 20947 20585 20871 20559 20917 20376 20926 20413 21015 20678 20958 20400 20893 20533 20951 20605 21123 20529 20936 20618 20379 20644 21037 20560 20993 20604 20912 20647 20747 20509 21124 20466 20736 20855 20723 20543 21123 20425 20780 20912 20818 20512 21065 20614 20689 20705 21090 20343 21001 21033 20807 20608 21234 20383 20773 20950 20872 20540 20885 20850 20631 20645 21275 20464 20765 20962 20818 20585 20965 21048 20577 56 59 5370 7957 9395 10668 11264 11972 12901 12895 37785 26999 24163 22329 21972 21533 21561 20813 21275 21053 21163 20535 21100 20882 21104 20683 21086 20773 20822 20808 21175 20869 20754 20681 21191 20752 20853 20712 21189 20696 20732 20683 21145 20657 21070 20800 21212 20610 21087 20716 21163 20467 21015 20805 21045 20584 21057 20647 21111 20640 21056 20669 21222 20513 20918 20595 21229 20545 20810 20506 21193 20592 20941 20536 21274 20631 21161 20424 21287 20711 21265 20344 21211 20710 21383 20374 21575 20657 21385 20493 21277 20520 21345 20507 21114 20480 21369 20503 21197 20421 21265 20623 21229 20428 21061 20625 21310 20599 21067 20576 21299 20667 21357 20337 21166 20687 21319 20474 21218 20326 21396 20464 21349 20234 21223 20401 21245 20582 21057 20445 21191 20556 21101 20272 21077 20557 21343 20604 21107 20421 21061 20582 21255 20410 21222 20392 21303 20413 21018 20363 21208 20553 21241 20205 21130 20460 21283 20512 21002 20429 21234 20484 21273 20493 21047 20513 21191 20695 20907 20547 21197 20541 21221 20601 20999 20512 21154 20632 21187 20482 21060 20552 21096 20750 20972 20465 21115 20601 21201 20435 21010 67 6672 11242 13352 13699 14989 15072 15873 15685 16250 40940 26477 22881 22429 21137 21335 21028 21372 21019 21016 20935 21092 20832 21292 20868 20748 20781 21153 20920 21232 20567 20969 20787 21181 21063 20851 20240 20971 20821 21320 20976 20723 20538 20976 21015 21241 20618 21049 20688 21137 21106 21076 20536 20730 20860 21193 21069 20787 20690 20846 20905 21359 20823 20739 20661 20965 21075 21164 20625 21006 21360 20896 21221 20732 21032 20696 21451 20882 21197 20545 21298 20857 21196 20982 21107 20608 20994 20997 21171 20914 20929 20579 21096 20937 21198 20817 21110 20587 20937 20824 21280 20836 21197 20599 21607 20865 21364 20797 21117 20407 21118 20761 21224 20848 21024 20519 21123 20867 21323 20755 21099 20544 21300 20857 21410 20723 21078 20721 21463 20760 21408 20613 21127 20687 21404 20791 21223 20373 21251 20777 21361 20653 21133 20032 21470 20716 21454 20378 21349 20686 21459 20663 21232 20560 21543 20620 21423 20440 21319 20648 21400 20733 21268 20438 21281 20771 21326 20601 21056 20673 21511 20775 21286 20345 21242 20711 21451 20629 21143 20454 21525 20485 21463 20394 21450 20488 21296 20643 21310 20384 21143 20589 9529 14264 16201 16265 17516 17290 17918 17573 18465 17904 26133 22101 22080 20647 21513 20631 21632 20623 21295 20608 21529 20407 21380 20525 21264 20334 21346 20503 21277 20515 21313 20599 21155 20717 21259 20692 21280 20520 21243 20642 21248 20589 21029 20641 21338 20821 21222 20762 21346 20763 21239 20842 21267 20774 21228 20505 21104 20481 21050 20656 21194 20645 21316 20782 21234 20537 21041 20521 21226 20747 21101 20823 21101 20551 21116 20579 21203 20964 21255 20697 20835 20681 20992 20846 21266 21007 21189 20653 20862 20670 21148 20957 21251 20837 20827 20611 21186 20905 21387 20726 20901 20791 21120 21210 21165 20740 20865 20848 21421 20841 20782 20725 21143 21207 20852 20864 20951 20914 21243 21031 20759 20752 21079 20977 21415 21033 20764 20774 20935 20877 20977 20864 20867 21129 20551 21261 20785 21319 20914 21369 20916 21281 20795 21139 20731 20919 20628 21091 20783 21058 20839 21050 20781 21099 20877 21166 20805 21133 20772 21064 20600 21208 20620 21047 20717 21261 20786 21177 20770 21311 20937 21400 20856 21193 20666 21083 20752 21347 20765 21251 20919 21312 20857 21159 20712 21428 20784 21484 20797 21127 20484 4365 16706 18720 18391 19076 18752 19635 19153 19708 19061 26672 21812 21849 20807 21281 20669 21571 20857 21426 20461 21584 20808 21433 20411 21524 20849 21356 20475 21481 20876 21309 20557 21453 20892 21287 20728 21484 20668 21208 20842 21591 20432 21511 20713 21431 20576 21591 20473 21358 20585 21276 20466 21297 20439 21287 20586 21248 20599 21393 20602 21384 20701 21207 20881 21303 20653 21424 20512 21212 20632 21200 20484 21360 20654 21510 20563 21249 20596 21304 20678 21189 20529 21335 20620 21348 20659 21196 20575 21176 20824 21126 20776 21340 20617 21179 20628 21208 20647 21320 20627 21313 20679 21026 20619 21046 20849 21116 20765 21184 20577 21211 20680 21318 20711 21329 20614 21214 20809 21077 20803 20956 20934 21113 21077 20313 21068 21032 21077 21063 21067 21117 20934 21137 20723 21197 20649 21139 20613 21145 20601 21126 20643 21168 20505 21335 20831 21353 20533 21427 20323 21404 20796 21351 20638 21335 21164 21339 20204 21272 20676 21477 20748 21376 20766 21349 21329 21319 21221 21076 21028 20965 21047 20905 21177 20908 21039 20954 20969 20905 20922 21041 20983 21000 20953 21005 21092 21001 21215 20960 21086 20841 21219 18307 20226 19633 20562 19802 20677 19783 20727 19959 30658 21566 21554 21026 21272 20951 21290 20937 21089 21016 21264 20850 21415 20738 21533 20544 21437 20529 21556 20768 21421 20914 21269 20872 21209 20848 21130 20855 21353 20728 21533 20600 21579 20459 21595 20504 21623 20608 21457 20794 21176 20892 21285 20881 21136 20924 21353 20849 21417 20694 21516 20732 21498 20480 21538 20537 21639 20716 21561 20727 21352 20689 21299 20523 21298 20631 21273 20487 21389 20498 21248 20517 21236 20778 21170 20709 21107 20545 21236 20517 21533 20501 21468 20407 21204 20485 21322 20817 21272 20693 21069 20554 21139 20761 21388 20519 21337 20727 21304 20650 21133 20813 21127 20712 21276 20764 21005 20708 21057 20696 21097 20703 21101 20733 21044 20724 20602 20806 21183 20776 21184 20589 21236 20684 21427 20678 21129 20823 20933 21076 21162 20923 21192 20856 21352 20771 20807 21205 21085 20592 21408 20688 21076 20901 21261 21146 21132 20615 21380 20856 20833 21175 20869 20873 21190 20765 21302 20922 20886 21134 20971 20896 21200 20877 21187 21022 21024 21073 21165 21214 20887 21392 20666 21216 20966 21274 20637 21209 20980 21420 20798 20935 20763 21114 20979 21241 21064 21303 21025 21299 20946 21178 20821 20900 20944 21175 20928 21307 20823 21104 20792 21411 20887 21241 20565 21056 20936 21349 20878 21191 20554 21287 20880 21473 20851 21472 20779 21248 20546 21239 20726 21398 20903 21440 20855 21387 20752 21456 20827 21497 20773 21524 20772 21536 20730 21553 20676 21641 20694 21507 20751 21411 20771 21472 20807 21485 20759 21278 20794 21325 20486 21309 20823 21576 20759 21564 20752 21463 20524 21286 20625 21510 20651 21315 20669 21385 20768 21189 20685 21489 20672 21357 20673 21268 20573 21445 20642 21312 20550 21192 20481 21491 20615 21384 20522 21216 20679 21452 20544 21269 20650 21313 20781 21152 20516 21083 20521 21356 20668 21233 20596 21271 20796 21231 20718 21141 20829 21307 20688 21157 20773 21280 20683 21133 20522 21319 20654 21212 20547 21283 20763 21080 20442 21399 20797 21088 20629 21408 20836 21287 20945 21216 20777 20935 21065 21238 20704 21109 20975 21031 20669 21287 20896 20556 20873 21253 20744 20876 21232 21110 20745 21345 20968 20993 21030 21111 20669 21053 21193 21091 20624 21449 20885 20823 21133 21052 21049 21078 21077 20935 21112 20817 21232 20723 21366 20789 21077 20945 21205 20807 21228 20835 21123 21085 21197 20800 21282 20829 21161 20995 21274 20899 21456 20764 21365 21056 21112 20879 21435 20549 21440 55 6467 9527 11143 11656 12951 12561 13827 13524 43338 32196 24999 22432 22369 20959 21741 20953 21248 20918 21335 20731 21528 20381 21514 20694 21259 65 7767 12693 15070 14939 16461 15672 17070 16392 17401 43025 26510 22829 22468 21065 21824 20648 21610 20900 21376 20821 21341 20755 21542 20673 21685 20389 61 13559 16919 16915 18087 17756 18460 18005 18757 18391 29542 23121 22189 21079 21691 20818 21637 20686 21483 20696 21303 20641 21264 20653 21309 20637 21386 11905 17958 18304 19373 18803 19794 19157 19806 19266 19747 24015 22158 21090 21496 20984 21925 20968 21283 20925 21315 20865 21397 20768 21367 20702 21285 20570 18517 19238 20256 19809 20409 19747 20488 19957 20561 30109 22263 21085 21568 20677 21390 21004 21425 20712 21379 20961 21351 20928 21303 20877 21257 20901 21348 20665 21390 20708 21273 20669 21185 20673 21088 20742 21216 20807 21135 20934 21032 21093 20959 21165 20974 21250 20919 21188 20921 21224 20686 21285 20708 21323 20578 21459 20588 21397 20839 21329 20934 21175 21157 21107 20944 21278 20993 21064 21033 21128 21013 21280 20901 21400 20676 21387 20562 21485 20674 21268 20919 21207 20876 21105 20840 21136 21003 21243 20869 21330 20710 21500 20725 21458 20690 21452 20599 21582 20737 21536 20707 21403 20785 21154 20782 21322 20701 21540 20552 21577 20384 21628 20590 21519 20739 21417 20857 21170 20903 21362 20747 21536 20631 21520 20460 21597 20659 21518 20640 21301 20583 21350 20673 21466 20530 21383 20513 21300 20611 21328 20992 21237 20772 21413 20655 21417 20591 21493 20491 21403 20471 21413 20657 21273 20796 21299 20629 21244 20677 21350 20619 21365 20764 21289 20774 21219 20800 21241 20806 21151 20681 21191 20694 21369 20700 21284 20737 21226 20688 21136 20821 20920 20669 21128 20832 21250 20700 21347 20711 21142 20727 21160 20919 21090 21136 21333 20924 20899 20975 21230 20904 21369 20935 21273 20657 21080 20817 21022 21113 20950 21109 21007 21079 20785 20921 21288 20823 21413 20709 21361 20795 21149 20749 21091 21168 20868 21228 20704 21201 20819 21397 20784 21360 20864 21269 21002 21148 20984 21273 21056 21168 21025 21111 20942 21280 20944 21334 20676 21312 20875 21396 20772 21247 20960 21657 20787 21370 20535 21339 21011 21068 20766 21360 20839 21121 20689 21486 20855 21112 20823 21447 20702 21088 20791 21529 20578 21487 20893 21332 20747 21535 20623 21366 20796 21873 20680 21599 20582 21488 20800 21267 20845 21553 20488 21490 20693 21411 20876 21265 20747 21443 20648 21711 20453 21492 20434 21493 20584 21299 20610 21083 20812 21256 20752 21392 20471 21182 20840 21425 20422 21464 20524 21421 20659 21325 20541 21241 20608 21293 20674 21152 20755 21304 20793 21207 20867 21131 20753 20565 20788 20642 20801 21125 20758 21240 20792 21043 20564 21223 20727 21077 20695 21296 20735 21233 20753 21355 20856 21336 20632 21460 20786 21269 20889 21163 20591 21076 20777 21193 20985 21036 21135 20819 21043 20947 20960 20883 21024 21151 20739 21377 20579 21504 20765 21096 20939 21008 21139 20967 21132 20809 20892 21110 20856 20917 21687 21015 21000 59 4007 8825 11340 11691 13155 13169 13880 14044 14241 42461 27733 23217 22368 21255 21721 8743 13357 15319 16344 16357 17356 16618 17582 17185 43462 26485 23305 21845 22151 20840 11304 16049 17827 18064 18822 18339 19157 18476 19604 43345 25707 22204 22264 21024 21831 11470 18129 18756 19919 18880 20139 19413 19833 19433 20168 24175 22575 21487 21637 21184 12015 18973 20679 20000 20566 19936 20808 19761 20620 20040 24080 21321 21697 20880 21403 20980 21563 20742 21488 20745 21561 20729 21682 20728 21461 20711 21258 20656 21508 20807 21242 20817 21554 20645 21281 20905 21346 20618 21338 20897 21239 20891 21384 20581 21239 20740 21325 20755 21228 20908 21069 20777 21233 20850 20543 20933 21395 20663 21136 20983 21292 20919 21219 20996 21072 20698 21280 21116 20961 20784 21241 21227 20984 20841 21360 20839 20949 20908 21454 20672 21092 21000 21306 20633 21104 21063 21299 20930 21194 20974 20786 21206 21008 21383 20672 21216 21079 21338 20680 21236 21113 21219 20761 21234 20938 21323 20695 21390 20916 21290 20609 21357 20880 21296 20737 21313 20911 21379 20625 21401 20839 21353 20622 21425 
21368 21840 21488 21709 21303 21554 21488 21545 21383 21939 21324 21640 21561 21540 21442 21530 21363 21893 21206 21569 21782 21696 21325 21942 21360 21718 21473 21578 21729 21451 21385 22016 21261 21540 21789 21621 21367 21794 21499 21711 21520 21539 21737 21417 21579 21705 21248 21639 21779 21268 21712 21599 21548 21745 21799 21383 21792 21541 21614 21539 21451 21498 21802 21399 21743 21624 21587 21423 21852 21217 21760 21456 21555 21422 21792 21298 21143 21285 21220 21157 21348 21138 21344 20898 21376 20888 21353 21009 21472 21129 21296 21164 21310 21264 21280 21155 21127 21175 21224 21256 21356 21192 21357 20997 21405 20952 21449 20898 21550 21166 21430 21300 21112 21132 21264 21126 21554 21382 21525 20839 21591 21229 21316 21204 21306 21070 21558 20846 21575 21140 21186 21221 21509 21010 21621 20977 21447 21141 21321 21008 21625 20763 21600 21159 21312 21129 21690 20843 21626 21120 21323 21080 21556 20818 21497 21140 21434 21035 21580 21116 21453 21156 21520 20994 21621 21077 21285 21102 21664 20791 21507 21149 21704 21013 21766 21100 21383 20951 21650 20950 21432 21015 21720 20846 5221 10769 13309 13517 14744 14758 15531 15335 16113 43318 24171 21718 21959 21315 21719 21108 21777 21030 21645 21021 21774 21043 21600 20985 21673 21128 21545 21109 21536 20944 21505 21133 21407 21002 21536 21289 21440 20960 21504 21253 21437 21065 21465 21166 21328 21116 21584 21189 21307 21091 21673 21226 21431 21003 21543 21184 21358 21122 21524 21176 21733 21136 21474 21220 21530 21077 21481 21233 21375 21021 21446 21254 21440 20932 21553 21334 21540 20981 21483 21191 21727 20900 21299 21233 21679 21073 21468 21239 21603 21231 21449 21081 21571 21484 21273 21092 21472 21373 21529 21113 21303 21221 21762 21225 21325 21046 21484 21504 21409 21577 21463 21221 21819 21096 21251 21159 21656 21482 21280 21061 21399 21443 21650 21094 21254 21348 21677 21438 21367 21087 21435 21655 21433 21252 21449 21473 21484 21380 21228 21451 21457 21547 21309 21498 21335 21565 21411 21373 21427 21431 21467 21529 21265 21383 21360 21532 21466 21520 21116 21379 21590 21483 21428 21269 21334 21515 21383 21575 21140 21405 21434 21646 21415 21361 21168 21640 21446 21681 21240 21271 21251 21576 21352 21575 20992 21447 21405 21601 21278 21414 21154 5157 15451 16854 16821 17595 17491 18184 17947 18327 17858 25128 21900 21910 21424 21463 21137 21724 21299 21763 21021 21470 21289 21816 21394 21734 20999 21664 21348 21772 21289 21544 21064 21811 21271 21811 21045 21621 21221 21769 21335 21594 20997 21633 21355 21771 21304 21520 21001 21703 21345 21835 21295 21708 21176 21815 21098 21782 20963 21212 21114 21668 21319 21773 21158 21608 21093 21720 21223 21505 21014 21569 21173 21772 21320 21544 21072 21716 21221 21819 21038 21529 21054 21728 21117 21744 20893 21628 21074 21635 21319 21771 21059 21538 21089 21559 21318 21749 21093 21298 21127 21619 21312 21735 21047 21533 21259 21660 21216 21691 21035 21620 21197 21595 21242 21717 21152 21445 21170 21603 21304 21525 20992 21522 21205 21770 21243 21523 21176 21520 21181 21776 21118 21594 21160 21559 21312 21734 21005 21507 21232 21622 21449 21448 21181 21584 21239 21739 21096 21611 21269 21480 21527 21378 21673 21541 21256 21783 21308 21453 21250 21532 21644 21653 21176 21400 21200 21690 21596 21295 21095 21480 21419 21764 21068 21450 21188 21608 21623 21346 21179 21384 21392 21842 21221 21403 21221 21476 21639 21696 21216 21419 21221 17847 18547 18937 19466 19394 19527 19169 19689 19684 30353 21799 21800 21530 21639 21432 21506 21424 21541 21230 21591 21610 21413 21495 21280 21553 21239 21465 21445 21539 21495 21421 21639 21196 21679 21359 21509 21441 21525 21232 21738 21520 21494 21376 21488 21269 21648 21465 21664 21416 21579 21392 21645 21325 21413 21072 21348 21228 21625 21414 21749 21511 21776 21385 21619 21025 21320 21191 21728 21435 21693 21504 21620 21078 21677 21289 21824 21394 21771 21173 21462 21191 21854 21425 21850 21383 21781 21056 21513 21297 21936 21294 21881 21158 21537 21216 21859 21337 21831 21186 21575 21339 21797 21427 21608 21032 21664 21372 21847 21221 21664 21238 21819 21376 21725 21028 21760 21069 21772 21284 21554 21111 21664 21175 21865 21279 21489 21100 21684 21112 21638 21307 21871 21186 21616 21233 21570 21122 21659 21053 21915 21329 21972 21112 21549 20976 21460 21017 21655 21035 21628 21180 21639 21203 21680 21094 21661 21155 21584 21192 21689 21176 21569 21616 21632 21012 21603 21341 21762 21322 21792 21208 21617 21114 21602 21230 21717 21115 21781 21403 21683 21138 21687 21070 21742 21074 21656 21303 21677 21202 21575 21068 16887 19917 20469 20075 20631 20065 20823 20413 20699 20313 22156 21523 21619 21268 21699 21152 21857 21280 21473 21020 21656 21365 21589 21165 21813 21447 21593 21127 21947 21289 21319 21149 21841 21271 21383 21248 21766 21185 21395 21633 21427 21205 21738 21474 21449 21155 21815 21221 21328 21696 21517 21096 21966 21233 21312 21647 21433 21137 21714 21649 21092 21520 21462 21429 21531 21496 21489 21816 21290 21591 21550 21383 21459 21431 21551 21712 21296 21571 21522 21585 21509 21349 21639 21526 21397 21785 21228 21688 21377 21734 21507 21633 21527 21436 21543 21361 21443 21585 21389 21697 21251 21730 21398 21705 21268 21667 21506 21593 21489 21479 21393 20981 21474 21672 21384 21800 21307 21797 21038 21751 21256 21804 21287 21817 21241 21889 21261 21856 21301 21742 21400 21656 21332 21589 21312 21508 21312 21489 21385 21679 21351 21619 21460 21648 21404 21701 21466 21607 21400 21692 21401 21702 21392 21739 21331 21720 21268 21612 21271 21626 21408 21698 21330 21625 21434 21654 21318 21683 21340 21626 21352 21904 21364 21797 21264 21648 21058 21463 21058 21526 21033 21511 21048 21626 21184 21686 21079 21788 21171 21828 21241 21882 20567 21423 20750 21351 20761 21240 20704 21223 20840 24020 21384 21601 21348 21647 21413 21591 21230 21566 21159 21577 21184 21797 21140 21834 21144 21613 21121 21613 21101 21698 21344 21557 21483 21625 21378 21449 21264 21456 21265 21747 21229 21845 21312 21627 21035 21602 21433 21487 21624 21467 21473 21875 21417 21453 21285 21498 21327 21730 21288 21917 21299 21744 21019 21605 21121 21505 21582 21440 21641 21365 21705 21219 21431 21366 21232 21626 21208 21766 21533 21554 21382 21527 21578 21479 21705 21377 21588 21255 21627 21461 21610 21520 21690 21639 21293 21559 21574 21544 21657 21520 21620 21284 21721 21421 21552 21504 21554 21475 21448 21504 21665 21424 21826 21444 21777 21387 21747 21139 21678 21154 21703 21248 21824 20576 21847 21255 21743 21437 21649 21517 21465 21446 21632 21400 21785 21120 21785 21305 21825 21360 21553 21356 21726 21280 21920 21240 21888 21401 21700 21425 21824 21115 21802 21239 21672 21372 21638 21445 21944 21308 21905 21368 21586 21323 21808 21267 21848 21283 21852 21127 21653 21232 21620 21308 21746 21104 21707 21171 21618 21283 21547 21153 21760 21168 21720 21159 21863 21241 21733 21111 21647 21031 21576 21191 21879 21360 21811 21252 21751 21235 21617 21065 21675 21241 21699 21372 21815 21065 21512 21293 21718 21414 21527 21181 21636 21209 21950 21312 21452 21168 21660 21213 21692 21440 21794 21148 21491 21191 21560 21213 21668 21325 21656 21440 21889 21577 21800 21497 21765 21321 21769 21455 21728 21419 21672 21535 21740 21496 21900 21580 21861 21632 21741 21237 21533 21350 21483 21258 21488 21392 21298 21364 21816 21728 21750 21364 21600 21191 21453 21184 21664 21671 21847 21353 21536 21299 21510 21152 21526 21397 21597 21685 21318 21399 21494 21682 21462 21668 21348 21312 21492 21640 21532 21553 21398 21414 21508 21623 21671 21511 21225 21623 21517 21765 21361 21380 21282 21684 21527 21527 21153 21658 21443 21666 21066 21472 21440 21830 21314 21455 21559 21848 21541 21760 21378 21735 21514 21550 21304 21766 21392 21707 21335 21753 21344 21376 21366 21811 21249 21622 21382 21867 21112 21770 21383 21687 21069 21891 21431 21589 21384 21808 21315 21568 21351 21760 21142 21780 21377 21687 21331 21857 21207 21674 21328 21817 20928 21812 21123 21672 21334 21756 21180 21824 21135 21574 21150 21748 21132 21592 21419 21636 21031 21724 21125 21612 21264 21767 21129 21799 21138 21670 21257 21741 21200 21784 21239 21837 21237 21652 21324 21669 21388 21835 21206 22048 21426 21751 21093 21795 11588 14525 15043 15744 15878 16465 16062 16979 16567 29171 22538 21660 21292 21606 20928 21672 21243 21351 21280 21469 21153 21532 21089 21673 21297 21348 4332 17000 17856 18371 18133 18717 18469 19139 18662 18989 24781 21861 21696 21500 20985 21748 21151 21832 21337 21408 21493 21450 21614 21485 21303 21575 21161 16503 18818 19816 19549 19700 19871 20205 20217 20049 19972 22732 21542 21604 21426 21570 21597 21369 21720 21316 21699 21364 21595 21468 21637 21641 21446 21576 19089 20500 20672 20644 20753 20700 20983 20585 21029 35319 22064 21317 21748 21344 21774 21365 21730 21390 21677 21556 21569 21548 21472 21480 21494 21440 21673 20784 21288 21086 21416 21136 21241 21136 21426 21107 24087 21515 21733 21485 21718 21538 21741 21431 21760 21412 21755 21424 21745 21472 21634 21447 21673 21428 22080 21463 21614 21436 21717 21361 21709 21361 21568 21255 21568 21143 21776 21275 21710 21162 21821 21211 21900 21188 21826 21129 21719 21145 21706 21203 21767 21049 21719 20985 21706 21165 21760 21265 21703 21325 21745 21479 21772 21225 21568 21308 21728 21296 21838 21147 21840 21238 21705 21179 21716 21293 21710 21356 21617 21430 21495 21333 21536 21255 21672 21316 21787 21253 21824 21187 21735 21081 21739 20992 21636 21346 21676 21448 21609 21488 21672 21339 21577 21396 21853 21263 21837 21113 21623 21148 21547 21613 21384 21646 21522 21367 21709 21225 21890 21216 21734 21214 21564 21458 21528 21804 21472 21462 21417 21273 21729 21290 21927 21227 21712 21290 21681 21609 21465 21739 21359 21671 21189 21769 21517 21485 21696 21353 21640 21472 21510 21740 21256 21669 21264 21715 21452 21580 21543 21428 21499 21474 21577 21684 21329 21764 21275 21681 21228 21809 21381 21744 21582 21785 21479 21575 21459 21737 21313 21816 21158 21820 21292 21733 21461 21666 21495 21487 21434 21700 21385 21991 21198 21899 21050 21899 21219 21814 21415 21764 21458 21728 21352 21504 21485 21760 21351 21880 21057 21870 21085 21948 21120 21904 21399 21790 21301 21728 21114 21682 21319 21873 21231 21869 21205 21747 21251 21725 21345 21671 21280 21653 21306 21705 21388 21699 21316 21746 21417 21700 21321 21801 21191 21664 21121 21765 21248 21877 21216 21714 21253 21568 21397 21641 21308 21789 21255 21648 21144 21888 21290 21752 21185 21831 21312 21007 21274 21779 21249 21570 21368 21652 21561 21813 21451 21541 21235 21824 21306 21558 21419 21596 21299 21665 21289 21728 21353 21837 21648 21504 21180 21915 21169 21559 21445 21718 21673 21554 21408 21565 21320 21952 21250 21600 21360 21468 21575 21474 21665 21531 21276 21692 21388 21593 21469 21677 21709 21455 21741 21295 21697 21269 21670 21368 21656 21413 21687 21427 21793 21437 21762 21469 21824 21396 21767 21436 21833 21361 21821 21469 21786 21363 21867 21397 21725 21289 21784 21187 21826 21184 21877 21280 21841 21356 21824 21340 21793 21464 21681 21459 21735 21409 21699 21349 21568 21451 21704 21468 21811 21314 21828 21304 21853 21127 21786 21239 21853 21427 21749 21380 21768 21261 21664 21255 21894 21193 21866 21174 21606 21266 21735 21464 21697 21335 21695 7076 14183 14861 16140 15891 16717 16472 17043 16810 17287 24016 22324 21127 21708 21056 4521 17600 18662 18448 19043 18654 19265 18686 19351 19080 25720 21538 21808 21169 21716 21177 19025 19580 20071 19933 20441 20323 20415 20165 20299 27099 22108 21271 21915 21212 21613 19307 20433 20551 21120 20423 20872 20951 20796 20628 21345 21786 21747 21732 21419 21364 19351 20971 21216 21387 21169 21029 21635 20901 21278 21301 21931 21367 21844 21315 21628 21718 21336 21613 21491 21692 21353 21710 21601 21533 21696 21739 21270 21676 21716 21495 21424 21715 21547 21520 21576 21794 21261 21595 21488 21623 21198 21744 21544 21360 21440 21814 21349 21662 21489 21800 21166 21744 21541 21653 21301 21860 21472 21569 21346 21909 21344 21753 21431 21979 21176 21757 21472 21858 21136 21783 21481 21831 21300 21927 21480 21766 21321 21947 21473 21621 21240 21824 21443 21889 21301 21844 21398 21876 21280 21925 21239 21717 21242 21908 21109 21715 21156 21913 21111 21744 21265 21972 21043 21697 21262 21966 21242 21745 21249 21901 21227 21746 21226 21849 21284 21642 21262 21876 21132 21716 21297 21751 21184 21648 
41466 36727 42662 35665 40960 33564 42508 33628 41600 38016 41237 34529 33463 33001 42016 33385 41448 37450 40017 33706 35863 34863 41168 38050 41447 35628 42560 34040 35341 42453 42001 38560 40605 33365 36061 34296 41616 36265 43088 35817 32760 33033 35505 41995 34130 35132 39948 34642 35864 40342 35317 34170 33250 35513 36261 41728 36160 33248 34167 33096 42327 43315 36556 41952 36186 34269 33728 42177 37127 40065 35686 42255 33753 42101 36184 40256 37064 33047 32991 41529 38183 39590 37320 42374 34800 40866 38305 39503 37143 42457 34138 42560 37877 40052 36071 42212 36537 40376 38249 40595 36501 39898 36187 39756 36673 41986 35968 40417 37584 40544 35685 42183 39167 39237 40348 39200 33488 41365 33292 35952 33984 40249 41099 40081 41100 38784 33623 36072 33765 38992 39772 40320 33030 37490 34377 37367 42520 39501 41233 37754 34458 35061 33778 39411 40908 39285 35203 36082 34373 38660 41295 38734 33504 35488 42935 39408 42411 38438 33872 38945 42692 39589 32951 37276 34375 38472 40757 39176 34672 35431 32727 39249 35242 37751 35831 38833 41847 37559 34487 37120 42185 38169 35425 36167 23284 30792 37684 30437 32693 33032 31380 39137 37853 41540 41721 35648 38080 41063 35717 38828 35942 37968 34647 37923 36034 38148 33923 37567 34886 38880 33446 38837 33110 36807 32678 39046 42264 37909 33078 40567 42288 37421 32608 40092 42613 38705 42731 39909 41149 39302 33765 39644 41217 38945 34968 40148 42552 38037 33472 39373 41762 39125 33077 39411 35705 38938 42704 40359 33304 38437 42891 40524 42144 38272 42455 40564 42296 37165 33387 41079 33376 37515 42954 40197 35888 36502 40835 40429 35305 38369 42741 40792 34277 40381 42624 38914 33748 42680 40819 38857 42599 42149 33399 38900 41111 40400 35799 40192 41429 38436 42947 32897 41665 33920 42535 40460 36743 38729 40343 39718 34680 42693 40688 38569 42052 42618 34715 38679 40370 41504 35248 42348 42016 39138 42523 34997 42180 40433 42629 42933 43174 41863 40529 42752 42740 33769 40960 43228 41674 33984 41848 42091 42445 42657 43053 33463 40181 41925 41626 33426 42436 33095 38902 41709 34144 42789 42424 40770 41446 33264 41573 34040 38995 42163 42565 34865 42048 41741 39616 34466 42240 35127 40249 40774 40448 33821 41233 34023 37208 42510 42345 34251 40576 42225 39527 22608 30080 33992 33795 32123 30696 37974 36075 39965 35072 40536 37497 37481 41996 42960 39409 35638 40793 35927 37977 42891 41030 36546 41682 35833 37680 34590 41208 36081 40711 33432 38176 36440 40594 36540 38201 34416 40077 35992 41332 34183 37484 34261 41475 36165 40803 32995 37495 35348 41220 36944 41019 35467 39525 36646 38841 36096 37351 40224 39192 34816 41073 36183 39392 34190 38662 35441 40231 32858 37633 33584 39480 35993 40960 33452 38181 35354 40121 36721 38208 33240 38266 35416 39136 35670 36614 34437 38325 34412 41045 36136 38317 33201 38472 33712 40900 36009 38742 40845 39349 34430 40677 35897 38288 33351 40309 34856 39837 35330 38134 34294 39879 34229 40301 35565 39109 42497 39749 34232 40704 33264 37207 32935 39813 35968 40512 33207 39415 32933 39664 35856 39145 34059 39255 33740 40640 35776 37782 32846 39950 34486 42307 42592 40115 33816 40360 35938 38680 34378 40384 42888 33504 41312 34997 33196 40064 36246 40960 42816 40448 33364 34316 34464 39465 41911 39981 35234 33937 40853 39081 42839 42535 35930 38442 42509 39947 34229 34330 41152 40005 41750 41844 36864 40192 42156 40458 42840 34795 34848 39828 42368 40455 35209 31944 36186 31555 40628 32686 38536 34443 34084 45473 36730 36144 33083 34320 42020 32953 41760 33542 40225 34197 34048 41895 43344 40773 33567 40370 42816 42700 33548 42891 42551 34780 39788 35273 41672 33096 42032 33339 39957 35817 32746 42721 41639 42966 40792 34522 42496 34816 41864 34112 41433 34808 41144 42244 38593 41472 40493 34592 41913 36067 32925 35559 41627 34528 37768 41092 40099 35516 42328 35496 32504 34017 38454 35098 40664 36487 41672 36168 39607 42736 40177 37158 42104 37079 41769 36216 38101 33008 40555 37760 40940 37440 39458 33275 39760 37085 41321 36892 39637 33968 41280 36406 42176 34321 37863 34596 41616 37117 40193 34713 40280 36736 41368 35818 37888 35573 38535 35959 40526 33541 38944 34645 39648 37169 40825 43029 39168 35029 38848 34468 40935 37472 39669 34221 40125 33697 38741 34850 38344 37685 41143 38296 38999 33616 37253 42515 38135 34788 38089 34507 39622 34624 39858 34903 38692 34899 39307 33765 39590 35216 39511 33672 33860 33971 37582 34112 41319 35831 41060 36129 39910 34340 38928 34070 40256 35559 39106 36091 41978 35220 39016 35239 38515 35867 38369 34624 40899 35209 39775 33945 38363 34873 36852 42616 38885 33831 38151 35968 42056 34834 40883 40248 33216 34135 40256 35304 39099 36940 40434 42807 38199 34608 41536 34144 39529 36526 42484 34250 39046 38115 40811 41358 39655 36768 40615 41948 40266 35953 39608 41949 34480 42074 40240 35811 42560 42736 39672 36657 40184 41139 35152 32970 38556 38296 40315 40948 34920 42184 39348 35381 34384 38548 32892 42355 42512 33543 42712 43114 36648 40752 34226 33370 41560 42781 42672 33911 35025 40519 33846 32768 33553 32662 41248 34704 32967 41634 36272 40256 35141 41408 35826 32748 34024 33042 42117 33664 41384 42560 34053 41705 35287 40168 35621 41760 35488 40327 34934 32588 33756 42616 43178 42023 38017 42679 35040 41492 36362 41028 36392 38198 36015 40184 36455 40788 36653 40439 37260 40520 36896 40903 36005 41746 34770 41040 34118 40658 32925 40600 42988 42022 35365 41488 34523 42349 34594 41824 35428 42564 34512 41666 35343 41824 35431 41510 35995 41179 35557 40322 34391 40496 34579 41656 35272 41024 34607 42165 34848 40960 35174 41255 34613 41280 37353 41562 36384 40224 34500 38128 42764 38503 33165 37904 33004 37984 34447 39424 35136 38627 36165 39581 36582 40434 37415 33086 42144 35240 41476 35257 40256 34541 40180 36096 39696 41721 34213 41194 34912 41947 34258 40275 33892 39424 33863 39398 36307 39113 36730 39185 34455 38774 34432 38881 35151 41094 33732 42768 34689 41384 42646 40522 42497 40627 35964 40363 36946 40803 34710 38087 34025 42137 43364 34613 42620 42921 37351 42138 42870 40994 43224 41687 35687 40599 37827 40928 35761 37949 34183 38763 32784 33703 41927 34686 41528 35482 40124 42535 41922 40373 34563 39835 35917 33250 33172 41442 33419 33579 42704 35529 41417 34026 40263 34688 42453 34460 32677 34817 34391 40771 33825 33543 33064 34473 32640 34029 40429 35632 42169 33521 32401 33120 42504 42610 32885 34472 41841 36659 42252 36101 41752 36019 39185 35133 39220 35425 39956 36469 33004 36736 40391 36110 42408 34712 32951 42417 42673 34405 41665 36279 38742 36155 40905 36618 41369 33590 41364 35827 40372 37550 40358 37142 41922 35321 42010 36563 39136 36362 40476 34921 41637 34608 42256 38054 41027 37493 41616 33991 41084 36344 40432 36897 40640 37064 39168 34704 40034 34382 40859 35872 38686 35447 39539 34321 40524 33644 39137 35621 39333 35465 39492 37217 40471 35779 39063 34816 38023 33696 39748 37432 41409 36578 40176 36096 40316 34368 38345 35049 40361 35321 41660 36736 38448 32872 40704 35585 41972 33445 39692 34401 39941 38204 40857 42689 39654 34822 40107 35276 42023 36272 39312 43072 40196 33639 40057 34843 41156 34752 42003 37323 33785 36004 42958 36056 41070 36026 42656 35619 42143 34992 33308 35533 42817 37594 33835 36855 34112 35696 40339 33472 41271 43170 40659 42900 41875 40994 41728 36577 35357 35763 41476 34074 39792 42733 39811 34679 34816 36808 41495 33255 40685 33025 38992 33168 41652 34354 34914 40943 42167 43236 35184 42483 34967 41240 41010 43063 34630 33058 33175 41637 42282 33017 34282 34792 32841 40039 34615 32944 35615 41430 41784 40768 35106 33096 32992 39099 34761 42221 34912 38384 42574 42413 36832 40896 42920 33925 36615 33280 35344 41400 35946 32857 33314 40647 35961 41536 35566 41304 36102 41126 41612 41876 36609 40138 34496 41524 37366 38963 35936 41712 35374 38524 37287 42372 34194 41445 36373 40984 33626 41401 35736 39193 35992 41446 35356 41136 37044 40114 35011 40907 36657 36773 36304 38968 34855 41148 36123 39700 36445 39349 33815 39290 35831 39086 33973 42056 34519 38023 35561 38982 34316 40114 36044 39049 36419 39070 34900 40264 35980 39691 36072 40472 36939 40403 34664 41032 35001 41609 36947 40002 38768 42188 36192 38772 36172 30176 30537 36032 33540 35072 29744 37072 35624 31174 42869 33842 34553 40669 34309 36692 34740 40455 41729 40668 42992 39568 33319 38489 34938 40656 41497 24070 35237 34760 40264 38195 33984 30857 38166 33392 36752 37089 36993 34944 42931 37976 35782 39518 36633 41304 41995 43264 42762 34631 42848 41292 34025 39395 30640 34532 35520 32758 34216 36353 40001 40267 38262 37232 35944 33237 33828 41941 33792 33987 41530 35579 40864 35350 41437 34315 42524 34656 34330 42229 33895 37656 32019 33718 33554 34708 34423 37639 33232 37848 38058 38972 41152 35926 41140 36189 41608 35689 41792 35246 33322 33358 33201 42281 42988 43296 42457 35139 35078 40525 38961 42069 39216 40566 39157 42168 39193 40629 33218 35449 42885 35692 33086 35657 42281 35776 41867 36231 41941 35916 42450 34535 42368 35143 42036 39274 42829 34639 42216 35656 41449 35600 41440 33658 40256 33593 39207 35840 40618 35575 39424 36730 40148 37485 39714 36558 39089 35625 39248 35363 39883 36044 38267 35589 37634 35288 39558 35653 40292 35475 41189 35883 42829 36161 40217 33605 40839 35528 40569 36944 39424 36640 40377 35417 39733 35428 40821 35584 41465 34422 42106 43372 41592 33268 40247 34899 40851 36343 40281 36468 39746 35860 38630 35866 37312 34290 41145 35096 42220 34444 42561 35004 41322 33956 41607 37197 40640 36961 39079 34567 39227 33581 34176 41443 34816 32813 41547 35617 40192 37232 39948 35765 40145 33778 42253 33296 36139 42440 42880 42400 40834 35654 40689 37942 40408 35318 40681 35052 34099 42474 36049 41728 35155 39714 35981 33010 42742 35207 41436 34536 42377 33127 35544 40205 34970 40136 35524 42391 34069 33265 41957 43397 42960 34054 34790 40995 35869 40621 35053 40192 36423 41608 35793 33856 35896 42816 34100 42379 35927 40859 36545 39428 36628 40768 35800 42522 34924 42961 43413 42637 35355 41639 38756 40085 37564 38312 37481 40172 36565 42138 35920 42374 35591 41324 32805 42749 35792 41508 37360 38305 37265 38807 38038 38821 37288 41979 36440 40888 35525 38984 34967 41088 37237 40526 37370 40036 35944 40206 35783 41248 35132 40352 34769 40844 35440 41666 35382 40876 35867 42048 35332 41032 36450 39881 34688 38797 35881 39984 37341 39950 35383 40219 33592 41672 34670 40880 36380 40394 34507 39066 37084 40755 35956 39603 36816 40786 38247 40608 36136 40119 33720 41408 34698 33392 36247 42507 33576 40186 36472 40935 33707 42053 34266 40722 34842 40656 35522 41440 36967 34345 32439 39533 37736 39543 33751 42229 35621 34816 33255 41573 33965 40852 37938 40201 34010 41244 42936 34115 42451 34923 33145 40396 35281 41645 34224 42642 35288 35347 42592 36096 40968 35250 40437 34983 41505 34780 41928 35381 42120 36304 42412 35890 42728 36589 41712 36128 42280 36882 41494 36837 42784 36327 41576 37376 41858 35861 40691 36123 39717 36564 39512 37324 40448 36807 41517 36536 41321 36261 42477 35146 42448 35986 41849 35392 41369 33645 42376 35384 42586 36630 40889 36653 40822 37184 39168 36161 40454 37148 42213 36084 41495 35960 40466 34698 40311 37388 39877 37184 39649 34263 40205 35888 42466 35313 41293 35549 32780 37253 34476 37842 35416 32803 29734 35950 33746 38818 39533 41866 39383 35423 38064 25934 31520 33068 30311 37125 33351 39427 33881 40504 37845 36916 33134 35973 39450 35420 39488 37397 33174 38391 37211 42312 41255 42454 39720 41031 41901 39872 40768 37797 40128 34504 40187 42277 33105 38597 42248 36437 37336 35533 33452 41136 36229 35767 35456 42167 41792 40900 37770 39968 41973 39739 38150 34410 36552 40677 41088 37998 41815 36902 41016 34644 35319 41102 34551 42793 35401 41417 35621 33915 33081 34768 35693 40422 35079 35212 42972 42282 35635 33409 32621 33417 35891 40439 34271 42544 34735 39914 35715 33176 41193 42345 36672 41428 35033 42705 36408 39623 35705 33240 34417 40768 37056 42512 33825 41143 37642 41216 36089 42315 38640 39654 36178 42454 37092 38982 36220 42784 36964 40792 37943 42768 36049 41083 38216 42687 34634 40232 36480 42317 37325 40916 36866 41840 37297 40456 37815 40540 35594 40384 37496 39030 35478 39260 37612 39136 35676 40292 38264 38248 35123 40408 38369 40513 35856 40103 37585 40405 35843 40197 36992 40593 34627 40392 37239 39170 35410 40681 36114 39516 34467 
23689 23340 23578 23409 23413 23297 23752 23195 23630 23553 23428 23521 23413 23431 23752 23183 23477 23642 23581 23379 23721 23304 23688 23459 23407 23808 23340 23415 23792 23458 23525 23608 22748 23481 23626 23335 23473 23445 23444 23500 23273 23628 23536 23300 23538 23719 23383 23776 23457 23780 23451 23621 23401 23736 23183 23648 23564 23388 23328 23762 23097 23749 23421 23402 23382 23704 23143 23701 23404 23381 23552 23712 23161 23792 23403 23392 23399 23827 23267 23772 23381 23407 23383 23789 23018 23754 23366 23412 23383 23778 23041 23744 23367 23401 23388 23780 23077 23771 23372 23476 23153 23697 23157 23597 23198 23560 23137 23636 23328 23509 23227 23658 23144 23668 23335 23581 23210 23789 23176 23668 23404 23463 23235 23577 23251 23445 23334 23377 23341 23616 23173 23469 23305 23427 23208 23617 23106 23531 23303 23432 23381 23493 23223 23602 23213 23441 23530 23241 23253 23728 23003 23808 23388 23479 23378 23808 23123 23671 23415 23556 23226 23684 23265 23540 23322 23690 23356 23724 23321 23392 23248 23727 23093 23647 23235 23833 23299 23575 23256 23491 23196 23698 23410 213 11799 15703 16401 17287 17273 18029 17509 18086 18028 34247 27282 26194 25418 25188 24481 24775 24380 24471 23972 24421 24016 24114 23763 24264 23737 24069 23575 24149 23494 23917 23591 24107 23660 23893 23558 23997 23378 23878 23565 23945 23495 23776 23636 23850 23505 23779 23665 23730 23441 23824 23588 23732 23456 23761 23509 23724 23381 23744 23563 23728 23431 23659 23497 23816 23248 23647 23483 23776 23201 23651 23443 23783 23186 23567 23491 23802 23411 22869 23378 23671 23567 23367 23414 23645 23623 23456 23324 23580 23675 23569 23511 23611 23532 23681 23273 23447 23514 23735 23431 23568 23408 23617 23799 23433 23472 23579 23496 23868 23253 23437 23401 23722 23643 23440 23306 23442 23752 23570 23511 23421 23416 23783 23523 23492 23367 23497 23780 23500 23312 23320 23520 23716 23365 23164 23632 23570 23559 23301 23566 23477 23707 23425 23560 23131 23697 23437 23751 23254 23510 23488 23706 23435 23555 23383 23543 23533 23671 23380 23397 23402 23685 23517 23620 23168 23628 23535 23653 23349 23401 23339 23800 23399 23671 23191 24096 23439 23718 23372 23609 23236 23609 23547 23825 23364 23563 23319 23789 23444 23713 23084 23591 13860 18157 18632 19187 19261 19901 19816 20265 19963 20183 27136 25984 24934 24911 24092 24409 24151 24392 23941 24032 23732 24230 23841 24224 23584 23991 23574 24109 23616 24012 23275 23860 23661 24015 23564 23654 23455 23928 23601 23914 23436 23740 23383 23920 23497 23832 23236 23786 23552 23919 23539 23704 23122 23817 23216 23872 23415 23665 23313 23792 23335 23834 23316 23668 23273 23708 23427 23836 23201 23608 23367 23691 23571 23708 23165 23594 23260 23747 23322 23527 23124 23694 23207 23749 23377 23586 23236 23685 23285 23752 23303 23402 23209 23651 23345 23750 23375 23395 23302 23592 23322 23628 23434 23505 23369 23558 23241 23768 23397 23597 23207 23601 23318 23736 23381 23396 23244 23619 23382 23660 23201 22888 23305 23557 23393 23705 23207 23447 23289 23542 23365 23542 23177 23463 23321 23639 23289 23373 23297 23475 23554 23623 23168 23449 23372 23659 23563 23266 23277 23479 23522 23655 23164 23402 23427 23562 23625 23296 23148 23491 23360 23862 23299 23281 23325 23362 23708 23584 23266 23385 23393 23691 23465 23329 23242 23500 23562 23619 23298 23331 23405 23575 23616 23257 23303 23438 23411 23767 23459 23436 23273 6373 19346 20050 20485 20879 21067 20929 21171 21084 21409 27524 25221 24535 24384 23868 24160 23769 23983 23818 23795 23796 23692 23649 23884 23589 23783 23543 23787 23568 23642 23639 23475 23591 23648 23451 23787 23272 23836 23543 23609 23271 23788 23529 23862 23441 23672 23032 23631 23239 23661 23491 23597 23341 23610 23428 23709 23463 23783 23453 23808 23331 23499 23282 23584 23325 23828 23424 23753 23442 23690 23222 23607 23220 23776 23303 23757 23284 23495 23324 23693 23410 23837 23394 23804 23223 23581 23237 23794 23387 23813 23309 23616 23079 23670 23360 23724 23372 23561 23182 23635 23408 23749 23271 23366 23249 23720 23403 23665 23129 23632 23334 23744 23228 23535 23303 23851 23306 23712 23149 23606 23185 23584 23301 23676 23208 23561 23202 23657 23361 23738 23124 23513 23131 23536 23246 23584 23258 23783 23287 23636 23077 23505 23430 23572 23145 23645 23206 23599 23174 23591 23191 23613 23249 23665 23276 23639 23312 23699 23404 23631 23240 23530 23223 23552 23280 23543 23211 23499 23392 23377 23196 23584 23340 23714 23273 23508 23270 23459 23061 23353 23291 23629 23344 23553 23277 23512 23145 23463 23392 23625 23201 23424 19361 21098 21412 21797 21632 21882 21558 22110 22028 36236 24697 24056 23907 23997 23591 23760 23480 23881 23507 23457 23244 23681 23443 23488 23234 23863 23445 23437 23269 23730 23385 23349 23244 23744 23361 23613 23475 23477 23257 23380 23712 23467 23236 23700 23341 23343 23523 23441 23204 23517 23398 23359 23469 23520 23259 23524 23462 23320 23486 23545 23592 23370 23646 23113 23644 23405 23432 23396 23556 23281 23645 23256 23616 23496 23284 23448 23463 23415 23632 23096 23607 23333 23533 23442 23392 23432 23457 23385 23681 23239 23605 23131 23671 23216 23677 23275 23506 23508 23329 23424 23536 23420 23571 23401 23748 23117 23744 23145 23752 23187 23719 23252 23576 23356 23383 23360 23533 23320 23517 23416 23563 23283 23699 23224 23732 23217 23726 23073 23744 22979 23742 23010 23747 22979 23766 23181 23721 23140 23753 23127 23688 23232 23561 23316 23683 23337 23553 23339 23664 23273 23589 23283 23634 23278 23743 23181 23714 23076 23683 23163 23633 23152 23633 23152 23653 23217 23745 23196 23637 23168 23649 23115 23737 23229 23783 23083 23725 23100 23641 23095 23645 23185 23580 23235 23578 23168 23542 23116 23564 23164 23530 18688 22214 22221 22504 22481 22669 22594 22777 22568 22599 24280 23701 23424 23646 23335 23643 23253 23786 23264 23579 23217 23488 23240 23531 23312 23430 23400 23984 23296 23443 23264 23434 23276 23652 23253 23664 23170 23648 23155 23399 23259 23396 23539 23391 23504 23505 23301 23247 23384 23534 23099 23736 23080 23767 23180 23557 23190 23350 23276 23330 23525 23344 23552 23329 23540 23180 23329 23269 23306 23335 23372 23557 23204 23680 23348 23499 23033 23433 23341 23407 23524 23660 23693 23035 23639 23296 23509 23458 23349 23384 23289 23428 23552 23330 23520 23232 23598 23159 23540 23308 23494 23413 22853 23259 23357 23364 23610 23161 23629 23040 23622 23111 23672 23220 23478 23293 23431 23387 23448 23377 23533 23398 23597 23317 23649 23240 23681 23142 23635 23031 23640 23120 23611 23304 23393 23280 23633 23297 23628 23040 23658 23531 23661 23300 23355 23282 23657 23008 23676 23186 23565 23296 23527 23318 23712 23126 23660 23303 23328 23287 23605 23075 23724 23111 23622 23324 23412 23210 23584 23200 23599 23738 23705 23161 23478 23292 23556 23161 23668 23164 23374 23347 23536 22945 23627 23040 23505 23108 23608 23333 23605 23164 23524 23043 23483 22974 23453 23134 23436 23289 23529 23175 23482 23145 23603 23309 23303 23127 23512 23265 23655 23114 23400 23201 23440 23306 23566 23053 23341 23304 23497 23281 23601 23093 23271 23204 23433 23326 23385 23242 23620 23314 23502 23253 23328 23052 23189 23169 23475 23257 23817 23255 23363 23228 23016 23022 23387 23195 23538 23158 23272 23151 23249 23296 23529 23553 23635 23535 23463 23245 23385 23204 23283 23097 23153 23357 23669 23642 23384 23296 23288 23153 23223 23320 23588 23624 23345 23321 23281 23450 23064 23424 23316 23669 23287 23485 23078 23584 23341 23596 23366 23404 23090 23575 23435 23542 23322 23257 23363 23528 23344 23442 23085 23420 23446 23543 23308 23286 23248 23680 23335 23496 23031 23591 23303 23559 23229 23414 23308 23600 23154 23271 23151 23643 23272 23392 23201 23701 23348 23599 23232 23644 23273 23260 23223 23648 23132 23356 23246 23701 23481 23595 23313 23636 22947 23732 23252 23557 23136 23617 23179 23405 23239 23670 23140 23479 23264 23592 22989 23608 23286 23449 23201 23672 22925 23668 23146 23628 23049 23511 22989 23389 23285 23595 23152 23678 23149 23573 23225 23520 23111 23608 23196 23519 23177 23472 23009 23622 23046 23495 23201 23518 23126 23665 23161 23641 23284 23521 23001 23627 23189 23356 23260 23408 23108 23610 23217 23389 23180 23376 1475 13574 15268 16705 16809 17250 17328 17832 17746 18103 30960 27502 25824 25585 25015 24900 24406 24560 24150 24529 24065 24259 24208 23977 23812 23991 23757 14531 18292 19100 19545 19571 20113 20091 19997 20256 19968 28270 25736 25092 24864 24503 24624 24374 24003 24328 23966 24465 23960 23958 23901 23965 24181 23820 18604 20258 20523 21148 21016 21586 21134 21579 21596 33575 26009 24612 24800 24344 24399 24055 24010 24078 24064 23902 24007 23856 24122 23655 23992 23447 23936 20673 21797 21789 22085 22081 21981 21987 22033 22090 27319 24640 24372 23964 24163 23790 24024 23624 24045 23334 23964 23597 24042 23301 24071 23493 24037 19001 22656 22422 22966 22519 22986 22528 22999 22576 22983 24576 24144 23705 23960 23552 23914 23514 23848 23534 23853 23488 23856 23497 23832 23395 23840 23425 23805 23437 23800 23443 23947 23355 23938 23357 23981 23346 23869 23072 23816 23156 23729 23246 23708 23234 23670 23336 23701 23381 23695 23533 23663 23444 23590 23408 23629 23368 23831 23383 23661 23289 23627 23329 23765 23272 23777 23187 23787 23300 23655 23190 23628 23160 23649 23482 23567 23431 23591 23368 23479 23319 23654 23389 23692 23285 23716 23484 23648 23337 23538 23262 23572 23361 23551 23419 23511 23479 23575 23410 23387 23368 23548 23349 23749 23320 23663 23206 23523 23414 23555 23661 23460 23608 23368 23384 23424 23327 23725 23287 23627 23223 23476 23471 23340 23713 23424 23405 23376 23424 23657 23281 23808 23184 23563 23157 23439 23597 23374 23438 23194 23621 23129 23717 23383 23578 23399 23537 23456 23409 23580 23603 23285 23627 23173 23708 23432 23498 23481 23617 23431 23515 23401 23674 23362 23731 23175 23704 23200 23740 23459 23537 23407 23489 23347 23403 23449 23672 23141 23719 23055 23749 23288 23692 23339 23570 23335 23417 23424 23622 23235 23732 22471 23755 23017 23821 23288 23619 23356 23343 23255 23494 23319 23641 23379 23669 23227 23724 23005 23694 23165 23735 23279 23625 23384 23248 23233 23399 23193 23604 23193 23751 23120 23704 23064 23522 23114 23509 23288 23512 23360 23508 23296 23508 23133 23519 23102 23656 23097 23644 23168 23700 23137 23528 23108 23408 23142 23590 23335 23456 23377 23527 23192 23507 23283 23651 23307 23541 23403 23453 23180 23658 23224 23547 23308 23581 23235 23478 23267 23644 23264 23497 23282 23557 23232 23363 23354 23436 23120 23680 23335 23280 23475 23541 23431 23625 23255 23286 23607 23468 23133 23656 23286 23216 23499 23306 23542 23336 23191 23783 23250 23402 23369 23192 23624 23367 23319 23417 23156 23712 23114 23707 23225 23248 23371 23371 23446 23261 23577 23381 23495 23373 23290 23368 23371 23434 23409 23424 23377 23404 23584 23405 23626 23337 23624 23232 23617 23233 23647 23251 23645 23240 23609 23313 23604 23386 23661 23383 23546 23329 23481 23333 23500 23335 23693 23366 23433 23308 23289 23307 23332 23302 23536 23300 23628 23261 23744 23184 23745 23261 23733 23022 23746 23021 23756 23201 23573 23333 23559 23332 23371 23296 23608 23250 23608 23150 23710 22969 23604 23092 23566 23392 23568 23171 23339 23107 23608 23282 23605 23047 10416 14260 16551 16725 17271 17122 17685 17565 18281 43624 29139 26161 25884 25237 25104 15511 19095 19366 20148 19726 20286 20221 20345 20246 20670 28128 26242 25107 25099 24765 13941 20018 21209 21052 21519 21310 21638 21484 21593 21509 27709 25178 24942 24745 24391 24336 21300 21863 22153 22277 22288 22205 22550 22563 22320 28104 24892 24395 24485 24003 24106 22171 22561 22868 23116 22755 22938 22999 23060 22769 23309 24325 24057 23873 23668 24087 23833 23776 23696 24107 23504 23915 23804 23726 23680 23884 23700 23847 23793 23872 23363 23878 23630 23808 23265 23941 23607 23568 23574 23896 23527 23752 23625 23952 23578 23991 23612 23660 23482 23887 23497 23576 23579 23962 23212 23801 23489 23894 23341 23925 23528 23667 23312 23872 23466 23541 23324 23867 23402 23704 23471 23834 23367 23642 23540 23832 23169 23780 23415 23801 23310 23717 23312 23857 23056 23703 23413 23696 23287 23709 23497 23523 23342 23683 23412 23696 23189 23712 23384 23637 23232 23665 23377 23558 23343 23690 23383 23437 23377 23714 23415 22896 23349 23686 23421 23552 23350 23671 23372 23776 23329 23620 23410 23436 23371 
23195 23328 23163 23571 22872 23716 23099 23549 23087 23481 22929 23637 22769 23655 23021 23387 23132 23628 23003 23596 22875 23467 22983 23175 22992 23552 22643 23616 22887 23219 22767 23704 22725 23508 22836 23286 22820 23388 22784 23468 22692 23369 22936 23400 22736 23523 22480 23300 22843 23369 22791 23488 22643 23430 22770 23325 22821 23189 22808 23367 22721 23303 22991 23123 22778 23605 22695 23305 22963 23155 22841 23553 22614 23418 23056 23405 22920 23559 22840 23285 23066 23181 22971 23582 22738 23172 23301 23125 22913 23533 22657 23184 23431 22951 22898 23687 22608 23227 23399 22912 22728 23578 22624 23020 23209 22976 22871 23323 22920 23119 23365 22725 23320 23075 23040 23024 23300 22897 23189 23218 23120 22976 23340 22848 23271 23005 23195 22897 23351 22885 23232 23024 23111 22868 23470 22832 23208 22999 23221 22991 23442 22585 23463 22993 23130 22923 23457 22457 23648 22919 23281 22851 23552 22737 23536 22807 23275 22846 23399 22821 23566 22666 23351 22864 23203 22668 23524 22400 23306 22872 23167 22699 23424 22834 23344 22932 23245 22675 23250 22637 23559 22427 23440 22753 23308 22871 83 2889 4883 6259 7188 8098 8926 43674 43504 39916 35762 32149 30750 29143 28282 26871 26902 26157 25838 25491 25430 24993 24697 24584 24733 24443 24066 24177 24278 24081 24103 23981 24087 23657 23848 23824 24004 23584 23893 23645 23847 23192 23742 23569 23872 23282 23734 23554 23924 23228 23595 23528 23754 23044 23577 23429 23737 23084 23564 23412 23777 23123 23367 23257 23720 23040 23549 23195 23625 23061 23300 23034 23615 23128 23353 22995 23649 23109 23491 22739 23430 23083 23563 22688 23519 23155 23699 22825 23249 22998 23655 22922 23408 22868 23697 22966 23348 23179 23618 22978 23490 22698 23405 23048 23514 22996 23257 22874 23576 22984 23535 22784 23623 23015 23521 22736 23351 22708 23737 22851 23467 22668 23421 22820 23576 22784 23296 22711 23447 23024 23301 23279 23314 22752 23491 22876 23141 22931 23322 22947 23306 22832 23287 22728 23564 22692 23703 22597 23389 22918 23536 22697 23331 22643 23607 22839 23223 22574 23377 22907 23387 22816 23310 22794 23382 22983 23133 22689 23383 22875 23429 22645 23083 22765 23340 22891 23340 22599 23345 22807 23335 22915 23244 22741 23337 22870 23441 22624 23184 106 1975 6102 9101 10133 11943 12570 13859 13779 43600 43680 38016 33488 31256 28729 27879 26833 26603 25730 25392 24839 25026 24598 24886 24171 24323 23961 24257 24000 24195 23389 23867 23678 23995 23783 23573 23296 23597 23564 23989 23352 23409 23168 23609 23424 23905 23043 23480 23188 23525 23563 23321 23242 23264 23277 23792 23306 23180 23017 23376 23181 23745 23071 23242 23040 23319 23531 23586 22987 23249 23506 23299 23504 23002 23169 23123 23548 23200 23391 22772 23324 23374 23435 23288 23207 23077 23267 23296 23391 23280 23184 22917 23213 23238 23436 23175 23257 22812 23262 23267 23476 23144 23328 22743 23381 23120 23527 23136 23309 22726 23331 23144 23370 23127 23048 22792 23316 23175 23477 22980 23109 23017 23479 23072 23461 22884 23187 22796 23479 22996 23463 22785 23345 22958 23511 23053 23351 22730 23404 23063 23520 22865 23109 22755 23539 22962 23600 22567 23432 23019 23591 22816 23240 22789 23644 22914 23543 22572 23724 22933 23478 22953 23313 22679 23465 23024 23457 22827 23309 22855 23512 22967 23425 22542 23458 22984 23584 22676 23271 22635 23659 22819 23618 22518 23273 22665 23353 22929 23403 22694 23248 121 6339 9975 13069 14143 15828 16072 16907 17051 18071 41179 35115 30720 29312 27034 26886 25280 25613 24701 25005 24072 24552 23733 24561 23600 24337 23375 24130 23328 23968 23383 23681 23303 23703 23379 23766 22948 23781 23084 23486 22957 23652 23127 23545 23059 23534 23040 23449 22838 23436 23033 23413 22914 23504 22997 23481 23079 23581 23032 23547 22711 23589 22850 23400 22969 23348 22907 23552 22893 23275 22798 23174 22992 23392 23035 23432 22667 22844 22854 23251 23087 23558 22945 23111 22729 23159 22903 23251 23265 23308 22677 23329 22888 23319 23075 23536 22808 23072 22897 23202 23209 23466 22749 23047 22992 23527 23168 22904 22787 23172 23342 23488 22729 23058 22903 23583 23200 22993 22775 23120 23080 23625 22930 23101 22784 23159 23092 23543 23127 22961 23058 22970 23397 23232 23365 23112 23222 22887 23046 22776 23225 23060 23288 23108 23271 23160 23260 23196 23338 23226 23214 23061 23123 23017 23128 22971 23168 22999 23264 23143 23321 23049 23347 23059 23392 23093 23446 23111 23276 22793 22988 22569 23063 22882 23392 23190 23450 23161 23383 22896 23011 22701 23295 22921 23414 22968 23313 22743 23207 22996 23471 23114 9720 13511 16105 17090 18407 18480 19043 18845 19972 37637 32528 27991 27140 25856 25763 24466 24528 23964 24502 23758 24282 23416 24122 23415 23977 23269 23964 23334 23701 23217 23736 23181 23369 23165 23719 22968 23350 23098 23744 22905 23719 23032 23488 22791 23744 22760 23496 22958 23577 22784 23590 22784 23394 22797 23369 22724 23535 22697 23315 22876 23371 22999 23367 22835 23638 22904 23408 22970 23549 22640 23540 22681 23497 22736 23250 22784 23313 22772 23427 22897 23517 22685 23415 22848 23299 22889 23307 22984 23319 22678 23308 22799 23408 22677 23401 22845 23249 22801 23204 22797 23232 22956 23352 22808 23313 22705 23362 22071 23411 22716 23357 22785 23208 22726 23157 22848 23287 22961 23213 23060 23244 22944 23220 22805 23277 22810 23398 22677 23345 22720 23405 23291 23435 22823 23449 22808 23496 22773 23441 22784 23414 22723 23351 22799 23174 22939 23209 22862 23143 22928 23161 22848 23214 22859 23052 22872 23159 22903 23175 22769 23118 22993 23075 22841 23245 22937 23163 23399 22871 23369 22949 23259 22923 23371 22906 23142 23031 23227 23044 23052 23102 23023 23205 23114 23040 22893 23071 22944 23112 22967 23105 14251 17632 18997 19905 20385 20589 21100 20856 21458 20731 28780 25751 25409 24148 24435 23637 23968 23480 23712 23428 23617 23187 23319 23233 23529 23083 23602 22948 23616 23002 23564 22776 23598 22900 23557 22963 23395 22955 23402 22971 23204 22976 23370 22886 23552 22052 23624 22599 23522 22777 23520 22793 23456 22915 23286 23046 23161 22992 23077 23035 23350 22889 23473 22692 23544 22492 23447 22517 23392 22555 23377 22861 23357 22944 23395 22869 23210 22822 23380 22705 23408 22811 23370 22563 23225 22677 23377 22808 23248 22625 23183 22683 23434 22630 23537 22429 23302 22478 23364 22857 23296 22802 23149 22785 23212 22770 23328 22604 23435 22919 23221 22576 23324 22736 23228 22949 23187 22896 23225 22876 23168 22921 23168 22881 23216 22792 23296 22583 23266 22753 23297 22682 23363 22818 23040 22919 23159 23024 23255 22585 23353 22691 23301 22796 22897 23043 23284 22720 23428 22821 23148 23128 22962 22920 23117 22664 23489 22891 22884 23235 23052 22586 23361 22765 23082 22879 23082 23200 23041 22647 23320 22744 23167 22898 23015 23187 23152 22997 22979 23267 22833 23169 23136 23110 22791 23296 23189 23117 22690 23022 23152 23273 23105 23303 23015 23095 22839 23129 22975 23222 23140 23361 23052 23344 22993 22942 22856 23321 22993 23303 22657 23100 23003 23310 23084 23118 22708 23280 23063 23378 23024 23280 22608 23688 22784 23400 22899 23333 22891 23312 22738 23187 22536 23201 22850 23328 22791 23306 22800 23264 22836 23378 22804 23417 22791 23402 22770 23389 22683 23297 22682 23319 22496 23058 22616 23221 22838 23325 22934 23414 22820 23521 22809 23292 23010 23143 22645 23323 22731 23328 22681 23325 22592 23201 22640 23376 22836 23363 22797 23201 22550 23225 22900 23255 22678 23144 22486 23280 22694 23369 22597 23261 22547 23447 22768 23320 22681 23189 22583 23425 22685 23304 22709 23186 22935 23260 22773 23160 22558 23329 22718 23296 22587 23182 22881 23195 22672 23153 22819 23159 22741 23354 22618 23398 22737 23150 22582 23385 22807 23079 22566 23357 22752 22621 22724 23328 22825 23131 22936 23161 22764 22997 23043 23240 22672 23288 22961 23080 22628 23277 22804 22795 22876 23280 22620 22875 23260 23065 22584 23456 22837 22993 23028 23237 22609 23063 23086 23005 22539 23613 22849 23094 23205 23063 22747 23219 22986 22945 22704 23003 23255 22662 23195 23042 22985 22959 23207 22832 23215 22956 23040 23005 22976 22842 23234 22992 23054 23085 23063 22948 23260 22832 23203 22973 23014 22906 23348 22697 23316 22941 96 89 81 2856 5613 6627 8208 8748 9529 9863 43661 43698 39966 35159 32788 30477 29121 27969 27604 26233 26512 25452 25728 25120 25011 24603 24931 114 3102 6838 10560 11427 13447 13743 14735 14889 43617 43691 39461 33994 31976 29485 28642 27361 26825 26160 26157 25185 25794 24486 25358 24303 25096 24030 4368 9385 13116 14551 16282 16759 17870 17712 18705 43686 37687 32408 30365 27872 27502 26005 26176 25248 25536 24763 25148 24324 24919 24009 24736 23874 6807 11228 15372 16509 18153 18385 19272 19349 20121 19958 36387 31012 28808 26987 26414 25241 25528 24600 24889 24257 24728 23980 24585 23731 24449 23703 24352 14706 18455 19138 20576 20411 21420 20980 21815 21270 21749 28839 26888 25504 25049 24444 24576 24007 24199 23828 24009 23721 23910 23671 23868 23486 23991 23431 23927 23318 23933 23306 23940 23256 23933 23159 23891 23042 24033 23194 23840 23345 23771 23377 23606 23121 23529 23059 23384 23105 23622 23355 23339 23592 23226 23546 23176 23544 23187 23528 23143 23540 23001 23429 23110 23618 23168 23479 23285 23417 23299 23392 23136 23133 23248 23353 23264 23483 23155 23680 23146 23537 22903 23674 23144 23472 23223 23384 23145 23261 23079 23345 23181 23186 23131 23462 23008 23525 22865 23552 22874 23540 22733 23632 22992 23545 23048 23290 23034 23332 22997 23588 22839 23570 22969 23575 22647 23619 22896 23345 23012 23343 22993 23258 22954 23591 22811 23624 22688 23635 22776 23444 22945 23400 22854 23399 22908 23512 22843 23597 22800 23432 22816 23445 22804 23255 22762 23672 22668 23313 22675 23447 22592 23464 22528 23370 22802 23416 23028 23384 22938 23232 22792 23345 22769 23424 22926 23346 22599 23297 22937 23271 22995 23089 22774 23133 22850 23367 22684 23441 22692 23257 22647 23412 22858 23289 22923 23031 22913 23284 22825 23519 22861 23401 22724 23316 22845 23235 23248 23121 23181 23168 22964 23181 22948 23403 22714 23572 23317 23278 22663 23152 23016 23020 23217 23054 23224 23370 22968 22962 22906 23345 22755 23580 22633 23351 22656 23112 23142 23064 23063 22700 23344 22720 23332 22698 23384 22802 23394 22913 23362 22821 23336 22755 23272 22728 23173 23414 23340 23008 23269 23047 23001 23021 23140 22857 23407 23318 23339 23115 23089 22926 23360 22939 23019 23014 23441 22981 23048 22842 23401 22824 23175 22971 23467 22647 23428 23026 23277 22669 23432 22676 23376 22930 23336 22769 23418 22681 23424 22892 23175 22913 23477 22616 23456 22886 23201 22967 23587 22902 23485 22535 23448 22650 23435 22665 23334 22688 23539 22753 23236 22776 23357 22578 23288 22678 23467 22799 23417 22679 23107 22659 23392 22648 23256 22759 23212 22767 23259 22754 23275 22689 23246 22632 23347 22700 23244 22754 23301 22696 23248 22769 23261 22909 23178 22805 23200 22854 23266 22826 23196 22906 23140 22844 23162 22801 23048 22908 23250 22832 23036 22801 23016 22964 23127 22823 23259 22677 23585 22697 23386 22679 23136 22503 23056 22768 23129 23216 22919 23137 22896 22913 23068 22840 23273 22664 23512 22960 23261 22695 23141 23033 22918 23221 22959 23206 22682 23223 23029 23196 99 63 1667 4785 6323 7985 8443 9747 10107 43639 43687 42734 37538 33944 31213 119 6007 10453 12235 13757 14608 15408 15514 16352 43621 43680 40128 35368 32370 30744 3533 10765 13597 16000 16985 17895 18208 19192 18679 19671 42123 35728 32053 30496 28220 11271 13495 17002 18064 19622 19383 20606 20161 20809 20641 37601 31823 29963 27773 27380 26301 18827 19963 21574 21148 22041 21580 22520 21456 22451 31062 28877 26688 26608 25241 25513 24827 24996 24236 24901 23829 24547 23881 24549 23680 24438 23845 24086 23559 24373 23575 24141 23440 24169 23527 23943 23603 23892 23412 24000 23452 23716 23319 23973 23352 23823 23380 23710 23133 23738 23282 23610 23365 23816 23159 23548 23361 23696 23040 23552 23447 23323 23131 23540 23425 23319 23125 23636 23323 23378 23142 23767 23127 23400 23088 23872 22822 23277 23209 23638 23176 23460 23344 23526 23444 23415 23446 23329 22962 23719 23241 23088 23433 23423 23391 23089 23501 23313 23349 22968 23431 23367 23271 23136 23533 23264 23249 23181 23605 23264 23398 23096 23656 23210 23299 23061 23530 23200 23433 23455 23703 23138 23438 23013 23660 
