# Supplementary material for: An Active Feature Selection Strategy for DWT in Artificial Taste
Source: Hindawi journal article supplement (doi:10.1155/2018/9709505), 2018-01-01
Supplement: f1 [file 9709505.f1.zip › spirit-hi-1.txt]

24896 23573 24937 23721 22997 22006 23639 21990 23312 22145 23521 21904 23442 22105 23491 21703 23580 22102 23485 21885 23642 22032 23360 21984 23631 21717 23404 22135 23623 21816 23074 22430 23004 22273 23161 22327 23131 22345 23066 22214 23025 22385 23001 22497 23035 22203 22998 22317 23015 22276 23000 22415 22794 22427 23020 22470 22747 22279 23112 22275 22812 22325 23051 22215 22798 22418 23032 22255 22981 22278 23058 22304 22914 22300 22940 22472 22931 22160 22925 22392 22815 22496 22979 22318 22774 22448 22809 22338 22920 22381 22715 22443 22895 22340 22727 22484 22820 22488 22868 22478 23064 22471 22921 22411 22870 22336 22765 22368 23027 22397 22778 22521 22887 22381 23091 22579 23218 22629 22888 22433 22676 22551 22775 22410 23063 22465 22612 22711 22711 22345 23005 22488 22506 22675 22698 22448 23124 22312 22584 22960 22789 22362 23076 22380 22627 22765 22632 22796 23044 22534 22649 22777 22750 22427 22720 22849 22679 22460 23054 22408 22564 23028 22668 22389 22999 22916 22621 22748 22745 22781 22518 22941 22455 22848 22695 22682 22656 22904 22632 22721 22780 22673 22634 23061 21854 22119 22137 22119 21926 22309 21944 22192 22162 22312 22665 23194 22638 22944 22674 23049 22487 23112 22528 22704 22710 22937 22296 23111 22568 22741 22739 22981 22364 23131 22560 22812 22613 22985 22359 23185 22449 22802 22615 22898 22374 23105 22407 22999 22496 22931 22395 23138 22392 23029 22449 22948 22322 23136 21639 23040 22503 22731 22496 23146 22300 23151 22471 22721 22496 23088 22257 23141 22504 22973 22519 22928 22260 23079 22353 22914 22409 22937 22296 23005 22208 22959 22311 22928 22378 22988 22352 23043 22401 22795 22440 22811 22308 22967 22267 22941 22396 22912 22226 22984 22192 23460 22350 22920 22433 23056 22264 22795 22438 23014 22272 22920 22321 22860 22574 22905 22349 22927 22412 22912 22439 22818 22491 22934 22348 22892 22360 22720 22487 22752 22400 22973 22396 22804 22432 22893 22419 22776 22555 22835 22294 22984 22478 22743 22516 22875 22402 22714 22700 22811 22393 22621 22773 22776 22440 22832 22875 22736 22227 22958 22713 22711 22603 22806 22705 22624 22681 22916 22718 22597 22477 22841 22566 22612 22560 23047 22860 22625 22528 22814 22882 22704 22455 22647 22475 22603 22921 22744 22865 22602 22071 22344 22228 21992 22457 22216 22477 22273 22356 21952 22157 22665 22912 22688 22999 22880 23026 22692 22835 22528 22897 22360 22844 22573 22883 22711 22984 22692 22976 22636 22894 22477 22868 22410 22853 22503 22987 22658 23095 22540 23089 22530 23001 22381 23203 22397 22868 22464 23026 22584 23157 22575 23048 22541 22985 22209 22836 22241 22900 22396 23134 22502 23090 22568 23065 22312 22973 22214 22855 22461 22937 22515 23179 22519 23017 22256 22712 22330 22952 22501 22993 22197 22923 22324 22532 22323 23079 22508 23072 22536 22917 22307 22866 22407 23063 22417 23057 22360 22835 22361 22878 22308 23028 22447 23012 22352 22935 22281 22849 22484 22986 22388 22798 21992 22818 22391 23010 22423 22817 22368 22730 22388 22982 22451 22792 22437 22811 22363 22927 22388 22823 22331 22886 22408 22854 22441 22712 22496 22755 22651 22811 22439 22677 22412 22857 22753 22679 22298 22569 22753 23024 22498 22660 22535 22873 22817 22665 22400 22847 22503 23094 22457 22624 22436 22973 22871 22695 22356 22533 22860 23050 22565 22487 22483 22870 22837 22722 22836 22528 22899 22548 22717 22424 22769 22746 22900 22551 22684 22838 22865 22573 22672 22670 22440 22172 22216 22274 22624 22250 22345 22293 22689 22204 22824 22672 23092 22680 22735 22656 23055 22520 22804 22552 23152 22566 22796 22524 23064 22440 22656 22610 23032 22416 22816 22545 23068 22394 22952 22567 23113 22352 23025 22510 23126 22266 22964 22479 22914 22181 23041 22420 22826 22336 23141 22469 22880 22452 23108 22492 22925 22432 23153 22132 23009 22329 23026 22347 23063 22395 22951 22478 22990 22327 22872 22419 22871 22200 23163 22312 22992 22407 23006 22231 22880 22336 23018 22485 22991 22453 22900 22378 23046 22464 22808 22468 22777 22360 22892 22461 22849 22368 22905 22504 22829 22415 22956 22452 22801 22496 22805 22294 22869 22512 22816 22273 22848 22555 22745 22298 23008 22492 22596 22761 22753 22325 22934 22413 22808 22356 22857 22567 22528 22804 22683 22304 23048 22426 22723 22675 22837 22388 22624 22812 22557 22489 22912 22405 22563 22476 22940 22444 22478 22844 22760 22852 22491 22780 22407 22809 22631 22759 22421 22988 22592 22569 22747 22816 22475 22832 22704 22803 22551 22954 22536 22692 22624 23000 22662 22898 22711 22766 22411 23072 22502 22768 22647 23076 22336 22903 22567 22889 22325 23036 22432 22779 22352 22701 21975 22820 22279 22529 22274 22912 22110 22928 22528 23120 22304 23072 22425 22800 22598 22988 22236 23168 22544 22721 22368 22976 22371 22989 22348 22973 22349 23072 22240 22903 22491 23003 22220 22890 22452 22884 22440 22868 21816 23093 22344 22971 22292 23031 22081 22789 22455 22901 22305 22984 22351 22956 22403 22776 22318 22921 22464 22835 22322 22953 22453 23181 22440 22784 22353 22960 22437 22746 22296 22887 22436 22902 22436 22748 22453 22688 22700 22825 22476 22929 22451 22736 22533 22842 22485 22550 22860 22668 22880 22773 22831 22614 22408 22889 22816 22644 23023 22884 22789 22609 22492 22665 22808 22644 22530 22253 22581 22786 22980 22618 22616 22439 22793 22648 22598 22560 22885 22744 22740 22555 22736 22656 22906 22469 22672 22516 23032 22619 22961 22329 22818 22628 23021 22436 22944 22350 23010 22584 23072 22471 22743 22525 23053 22548 22868 22247 22934 22582 23110 22410 22805 22396 23191 22528 22989 22319 22816 22528 23100 22528 23072 22427 22600 22403 23104 22391 23024 22319 22861 22279 23077 22172 23045 22417 22928 22489 22806 22472 22802 22328 22876 21654 23061 22192 22766 22343 22836 22299 22772 22146 22543 22338 22733 22224 22808 22279 22681 22424 22803 22472 22936 22417 22738 22500 22885 22332 22778 22279 22826 22598 22950 22768 22912 22637 22528 22383 22778 22322 22819 22580 22737 22487 22620 22631 23012 22931 22965 22792 22863 22643 22628 22327 22523 22486 22481 22332 22599 22535 22348 22613 22274 22628 22412 22742 22217 22470 22349 22517 22360 22667 22551 22727 22583 22803 22510 22887 22601 23079 22720 23077 22645 22964 22587 23027 22635 22839 22375 22896 22535 22749 22316 22916 22470 23003 22626 23049 22498 23074 22516 23008 22289 22964 22231 22958 22477 23077 22663 22992 22504 22971 22404 22885 22309 23009 22416 23025 22204 22976 22281 22770 22345 23042 22431 22951 22309 22829 22320 23021 22297 22992 22301 22901 22282 22358 22375 23023 22481 22854 22336 22775 22364 22876 22551 22893 22376 22912 22249 22916 22432 22775 22457 22829 22263 22912 22573 22870 22358 22540 22706 22893 22502 22732 22480 22736 22862 22604 22439 23138 22520 22930 22557 22617 22462 22528 22880 22785 22477 22514 22321 22808 22660 22737 22848 22230 22816 22661 22829 22442 22662 22439 22983 22784 22791 22364 22902 22707 22997 22344 22845 22637 22956 22451 22754 22551 23077 22460 22853 22439 23063 22473 23086 22433 23136 22480 23246 22380 23159 22426 22748 22289 23095 22410 22963 22422 23104 22575 22698 22489 23085 22412 22860 22449 22903 22278 22913 22434 22921 22834 23012 22379 22830 22264 23002 22376 22892 22291 23048 22329 22428 22484 22914 22382 22872 22403 22816 22369 22900 22384 22806 22520 22905 22292 22799 22424 22873 22364 22833 22461 22808 22412 22871 22753 22836 22293 23020 22471 22647 22572 22797 22482 22816 22881 22549 22510 22752 22540 22592 22353 23072 22555 22676 22898 22604 22432 22944 22656 22597 22624 22647 22888 22279 22887 22631 22628 22594 22840 22560 22771 22736 22753 22391 22937 22422 22813 22657 22913 22424 22833 22536 23283 22512 23032 22501 22907 22547 22951 22376 23044 22412 22813 22528 23076 22116 23088 22479 22435 22400 23233 22280 22886 22539 22827 22224 22992 22546 22698 22441 23109 22357 22944 22344 22836 22311 23033 22289 22805 22501 22882 22265 22965 22272 22887 22259 22968 22347 22935 22292 22868 22328 22967 22384 22874 22523 22891 22343 22931 22481 22858 22423 22976 22530 22905 22456 22816 22302 22776 22555 22823 22224 22876 22391 22743 22648 22759 22624 22976 22551 22636 22576 22733 22488 22638 22856 22583 22383 22999 22464 22809 22868 22694 22976 22893 22510 22546 22705 22960 22593 22488 22901 22049 21863 22026 22264 21864 22168 22040 22233 21987 23044 22770 22935 22901 22886 22453 23072 22614 22739 22651 23089 22640 23021 22720 22874 22477 23054 22545 22299 22128 22411 21900 22568 22118 22369 22082 22570 22377 23109 22624 23061 22478 23218 22400 23046 22553 23029 22330 23053 22560 22937 22349 23088 22605 22467 21862 22592 21941 22657 21975 22512 22400 22486 22213 23020 22467 22916 22439 23055 22300 22936 22411 23013 22438 22960 22411 22841 22304 22872 22391 22804 22056 22581 22184 22628 22101 22552 22179 22567 22246 22565 22489 22889 22449 22947 22597 22905 22398 22810 22572 22776 22608 22712 22516 22816 22516 22714 22505 22728 22380 22623 22459 22461 22497 22359 22454 22930 22320 22757 22792 22606 22592 22557 22552 22939 22326 22680 22707 22540 22699 22596 22882 22345 22781 22792 22784 22289 22660 22649 22922 22568 22696 22501 22995 22619 22967 22447 22682 22508 22901 22628 23014 22685 23014 22411 22734 22112 22770 22344 22912 22402 23000 22535 23028 22468 23104 22550 23090 22417 23062 22356 22945 22369 22766 22443 22772 22368 22776 22190 22881 22216 22885 22300 22912 22301 22788 22292 22776 22455 22949 22443 23032 22340 22997 22370 22996 22327 22968 22401 22989 22303 22981 22391 22836 22385 22803 22375 22833 22354 22936 22273 22787 22455 22821 22492 22964 22424 22792 22389 22733 22413 22872 22322 22700 22616 22928 22722 22760 22464 22742 22442 22664 22264 22902 22826 22702 22519 22582 22512 22598 22487 23008 22829 22560 22496 22610 22442 22656 22945 22923 22849 22680 22741 22394 22676 22585 22881 22699 22647 22410 22670 22712 22935 22617 22830 22389 22824 22560 23051 22562 23031 22450 22961 22532 23040 22394 22663 22465 23092 22493 22849 22199 22954 22587 23054 22298 22726 22374 22992 22405 23008 22244 23168 22520 22990 22279 22893 22529 23099 22313 22796 22411 23115 22430 22982 22443 23062 22256 22861 22337 23004 22366 22873 22432 22902 22313 22856 22289 23072 22352 22931 22272 22979 22216 22831 22277 22931 22266 22770 22265 22936 22368 22930 22476 22912 22352 22848 22456 22828 22327 22668 22481 22849 22352 22776 22484 22817 22412 22773 22641 22759 22497 22893 22668 22576 22315 22924 22460 22708 22675 22727 22440 22494 22912 22642 22361 22773 22699 22698 22293 23028 22573 22454 22800 22601 22472 22466 22746 22741 22752 22528 22847 22505 22723 22754 22832 22585 22853 22791 22720 22535 22846 22521 22703 22682 22885 22513 22720 22592 22861 22445 22960 22487 22705 22650 22951 22288 22935 22501 22812 22436 23061 22370 22706 22650 22947 22221 23050 22491 22821 22458 23016 22208 23120 22485 22959 22417 23079 22346 22921 22543 22752 22401 22985 22286 22933 22546 22855 22228 23216 22187 22947 22311 22873 22256 23030 22348 22807 22394 22792 22346 22949 22366 22925 22405 22814 22217 23024 22329 22996 22466 22848 22352 22936 22521 22873 22428 22956 22348 22710 22453 22873 22388 22978 22314 22682 22505 22797 22413 22848 22455 22769 22441 22817 22320 22959 22410 22620 22648 22812 22375 22983 22455 22720 22761 22749 22515 22848 22423 22733 22744 22809 22502 23072 22464 22615 22195 21802 21635 22264 21833 21936 22179 21937 21922 22272 22537 22752 23064 22789 22717 22644 22326 21874 22471 22092 22242 22252 22369 22096 22516 22784 22792 22821 23005 22482 23121 22295 22371 22293 22662 22007 22619 22308 22349 22311 22621 22434 23143 22682 22763 22656 22858 22288 22797 22329 22797 22313 22826 21794 22754 22316 22970 22417 23117 22351 23025 22578 22873 22131 23006 22235 22702 22362 22882 22179 22984 22571 22752 22604 23044 22438 22949 22475 22956 22296 23162 22400 22972 22423 22880 22297 23084 22376 22896 22452 22832 22356 22939 22354 22924 22378 22944 22372 22926 22258 23012 22321 22963 22372 22867 22368 22976 22403 22923 22357 22907 22305 22840 22385 22737 22378 22784 22458 22896 22325 22761 22429 22722 22360 22684 22434 22787 22308 22864 22293 22916 22416 22816 22561 22892 22705 22775 22454 22673 22904 22395 22392 22883 22692 22869 22514 22822 22595 22664 22421 22596 22475 22744 22477 22576 22421 22699 22539 22665 22449 22738 22634 23065 22872 22852 22362 22855 22426 22682 22470 22961 22820 22599 22650 22487 22845 22625 22784 22604 22648 22536 22864 22675 22853 22728 
21865 21137 21810 21347 21844 21096 21874 21382 21885 21292 21844 21392 21724 21301 21884 21448 21765 21332 21760 21312 21907 21296 21867 21313 22032 21321 21879 21331 21848 21383 21868 21313 21992 21289 21863 21565 21921 21213 22095 21251 21750 21807 21667 21258 21618 21883 21613 21378 22059 21785 21735 21436 21881 21849 21424 21764 21847 21739 21400 22061 21650 21637 21673 21913 20987 21717 21805 21639 21437 21856 21608 21504 21708 21862 21639 21789 21768 21671 21425 22042 21724 21678 21671 22031 21338 21792 21696 21812 21211 22151 21556 21736 21809 21879 21530 21931 21683 21753 21237 22140 21471 21751 21579 22105 21152 22103 21400 21774 21427 22119 21349 21735 21623 21943 21159 22009 21377 21792 21556 22125 21124 22169 21387 21904 21497 22263 21155 22197 21430 21929 21433 22296 21084 21991 21387 21883 21260 22080 21344 21859 21585 21909 21184 22272 21281 21975 21512 21975 21161 22202 21205 21648 21334 22187 21113 22191 21171 22119 21265 22011 21045 22093 21292 22052 21312 22068 21192 21911 21440 21825 21179 22069 21161 22019 21452 22016 21072 22093 21116 21991 21380 21916 21097 22053 19498 20253 19688 20411 19677 20615 19842 20536 19959 20497 21559 22336 21489 22013 21680 22072 21552 22114 21250 21827 21528 21847 21456 22058 21251 21995 21531 21880 21253 22115 21297 22016 21427 21820 21159 22029 21209 21724 21479 21687 21190 21958 21301 21626 21682 21713 21297 21997 21236 21593 21724 21835 21293 22041 21159 21892 21520 21649 21707 21639 21374 21998 21258 21686 21692 21574 21481 22232 21200 21828 21776 21705 21488 22217 21456 21667 21872 21696 21432 22210 21368 21655 21872 21582 21431 22140 21689 21296 21719 21488 21602 21805 21788 21346 22016 21492 21541 21863 21791 21418 21900 21665 21569 21821 21640 21509 21877 21467 21672 21770 21750 21541 21872 21191 21831 21634 21720 21571 22024 21229 22097 21655 21556 21559 21847 21221 21981 21474 21725 21615 21927 21271 22077 21467 21699 21563 21978 21206 21972 21508 21213 21281 22146 21356 21713 21479 22204 21222 21849 21479 22219 21056 21991 21509 22066 21080 21960 21446 21897 21168 21934 21522 21818 21201 22097 21520 21969 21186 22221 21405 21920 21121 22199 20997 21904 21072 22074 21213 22016 21212 21991 21315 21836 21031 21532 21211 21766 21407 21958 21059 21914 19485 20517 19911 20810 20102 20904 20130 20859 19968 20895 21442 22222 21563 22268 21669 21981 21344 21932 21350 22035 21417 21806 21317 22088 21491 22007 21363 21920 21292 21861 21286 21765 21211 22017 21395 21900 21159 21856 21265 21920 21335 21750 21255 21792 21288 21639 21250 21734 21504 22090 21689 22027 21472 21713 21213 21423 21217 21576 21232 21739 21689 22338 21675 21689 21238 21591 21216 21552 21120 21953 21735 22238 21558 21687 21259 21606 21442 21571 21536 21972 22006 21696 21358 21416 21258 21223 21168 21442 21884 21751 21869 21528 21005 21191 21586 21592 21995 21687 21726 21570 21548 21383 21696 21760 21904 21671 21591 21411 21665 21617 22100 21601 21735 21317 21643 21366 22092 21814 21911 21542 21669 21352 22038 21557 21857 21456 21588 21293 22086 21532 21810 21299 21718 21371 22247 21543 21921 21061 21798 21504 22119 21301 21949 21005 22091 21403 22155 21191 21735 21354 22109 21529 21946 21152 21989 21559 22165 21279 21697 21282 22220 21389 21971 21078 21970 21392 21805 21241 21901 21269 21965 21111 21892 21296 22063 21280 21681 21298 21966 21361 21885 21052 21884 21351 21932 21224 21859 21361 21894 21139 21925 21398 21077 20327 20992 20539 21015 20364 20992 20580 21167 20512 21921 21449 22195 21479 21805 21383 22138 21274 21960 21460 21927 21277 21944 21305 22042 21239 22126 21313 21995 21334 21672 21513 21947 21270 21541 21599 21891 21232 21490 21837 21665 21360 21665 21904 21644 21396 21870 21782 21675 21423 22101 21223 21558 21376 22151 21333 21569 21671 21634 21250 21610 21764 21559 21330 22195 21220 21785 21209 21874 21750 21281 21856 21511 21611 21373 21906 21376 21504 21740 21650 21844 21576 21749 21662 21432 21974 21692 21723 21592 22032 21466 21776 21640 21999 21141 21840 21541 21794 21273 22017 21687 21053 21356 21949 21411 21670 21594 21888 21394 21719 21593 21897 21140 22033 21481 21935 21427 22091 21132 21902 21424 21929 21022 22247 21341 21959 21304 22169 21673 21813 21547 21949 21236 21963 21287 21703 21463 22117 21065 21861 21469 22092 21310 22009 21114 21836 21315 21828 21361 21966 21360 21926 21267 21873 21106 21923 21364 21836 21159 22028 21124 21853 21207 21881 21142 22002 21349 21836 21137 21884 21191 21824 21446 21991 21258 21795 21351 21779 21135 21996 21312 21794 21320 21814 21152 21776 21248 21657 21180 21902 21252 21157 20791 21133 20647 21184 21000 21159 20742 21412 20738 21585 21873 21831 21241 22127 21237 21715 21653 21763 21376 22129 21472 21580 21482 21963 21260 21709 21962 21574 21231 22077 21184 21843 21713 21491 21680 21312 21957 21516 21744 21659 21748 21142 21746 21726 21572 21639 21831 21424 21718 21725 21914 21363 21816 21419 21657 21714 21846 21281 21968 21666 22201 21410 22039 21321 21675 21669 21988 21138 22039 21528 21515 21332 22080 21390 21713 21609 21991 21145 21965 21528 21841 21164 22197 21255 21738 21372 22114 21031 21917 21499 21901 21137 21987 21584 21937 21020 22082 21433 21955 21154 22100 21182 21897 21229 21937 21325 21825 21235 21836 21461 21769 21177 22103 21159 21958 21056 21822 21248 22099 21388 21809 21260 21793 21444 21896 21290 21836 21318 22007 21319 21738 21265 21687 21424 21973 21242 21829 21095 21925 21408 21918 21255 21863 21228 22183 21309 21668 21606 21662 21709 21793 21335 22124 21053 21835 21755 21536 21196 21776 21367 22115 21582 21564 21074 21735 21313 21604 21679 22080 21568 21703 21343 21479 21848 21434 21255 21640 21797 21804 22023 21707 21903 21688 21726 21671 21677 21486 21637 21479 21666 21469 21491 21207 21577 21221 21742 21488 21648 21322 21472 21188 21688 21181 21544 21393 21932 21411 22174 21495 22158 21554 22156 21549 21858 21251 21655 21632 22011 21323 22224 21421 22240 21483 22114 21488 21969 21168 21710 21196 21761 21197 21736 21131 21737 20453 21953 21164 21904 21190 21792 21274 21786 21415 21827 21187 21841 21139 21939 21249 22166 21219 21901 21094 21852 21190 21893 21288 21753 21451 22040 21382 21971 21482 21930 21442 21927 21308 21735 21191 21700 21282 21798 21381 21711 21189 21847 21530 22153 21805 22032 21421 21737 21287 21774 21376 21543 21301 21816 21901 21945 21567 21585 21252 21443 21291 21460 21510 22121 21677 21539 21358 21413 21360 21193 21649 21730 21977 21617 21840 21513 21504 21559 21821 21793 21946 21621 21776 21424 21754 21745 21908 21508 21794 21242 21653 21716 22161 21513 21847 21153 21848 21569 22064 21415 21985 21211 22016 21425 22010 21253 21757 21225 22147 21367 21921 21031 21943 21488 22090 21416 21772 21300 22192 21484 21975 21053 22036 21313 21960 21327 21627 21278 22021 21456 21864 21200 21855 21168 22056 21255 21878 21095 21964 21136 21766 21367 21933 21426 21825 21343 21696 21519 21952 21137 22083 21292 22008 21233 21827 21321 22000 21381 21764 21133 22030 21394 21593 21177 22036 21401 21607 21322 22176 21218 21680 21281 22033 21319 21639 21471 22123 21272 21654 21440 22046 21427 21528 21872 21718 21884 21290 21809 21637 21789 21373 21967 21613 21719 21609 21874 21536 21527 21724 22034 21265 21753 21619 21781 21172 21936 21736 21864 21237 21967 21484 21750 21380 21938 21332 21753 21569 21916 21180 22169 21483 21866 21324 22064 21315 21798 21307 22072 21259 21755 21490 21802 21072 22080 21464 22000 21160 21991 21208 21952 21282 21858 21133 21978 21207 21822 21238 21893 21120 22060 21147 21685 21251 21885 21243 21959 21482 21879 21240 22009 21184 21815 21432 21792 21382 21927 21403 21895 21354 21806 21191 21895 21500 21793 21121 22025 21223 21756 21558 21765 21421 21715 21544 21693 21326 21929 21361 21593 21769 21602 21414 21769 21388 21663 21396 21977 21120 21740 21855 21511 21263 22034 21257 21699 21327 21805 21668 21216 21873 21432 21589 21775 21828 21560 21750 21728 21744 21432 21879 21632 21634 21612 21961 21104 21893 21635 21591 21492 21992 21356 21760 21465 21932 21309 21959 21531 21563 21255 22039 21309 21890 21592 21939 21187 22194 21361 21752 21436 22170 21203 21927 21416 22279 21276 22000 21389 21771 21523 22023 21234 22017 21121 21869 21261 21964 21632 22011 19554 20237 19789 20601 19776 20612 19805 20616 19831 22456 21463 22071 21705 22115 21225 22118 21425 21848 21450 21921 21242 21914 21433 21830 21345 22023 19980 20582 20183 20548 20247 20877 20252 20715 20311 20864 21653 22188 21815 21764 21462 22059 21415 21778 21985 21835 21374 22137 21403 21554 21248 22072 21717 20561 20292 20515 20659 21255 20776 20720 20372 21096 20542 21644 22016 21828 22096 21510 21700 21373 21696 21566 21681 21669 21926 21824 22004 21781 21937 21516 21232 20899 21152 20836 21410 21206 21504 21138 21495 21030 22177 21787 22087 21456 21856 21221 21862 21507 22028 21329 21766 21358 22179 21248 22029 21487 22091 20672 21777 21219 21488 21169 21528 21079 21913 20875 21985 21574 22029 21123 22137 21200 21889 21312 21927 21319 21931 21212 21825 21445 21888 21061 21888 21319 21875 21148 21896 21383 22017 21100 21780 21189 21950 21480 21848 21245 21882 21344 21748 21425 21959 21409 21762 21218 21901 21107 21786 21268 22062 21397 22021 21700 21931 21731 21895 21681 21655 21504 21543 21388 21567 21367 21699 21590 21832 21380 21987 21254 21533 21266 21653 21222 21511 21335 21765 21610 21218 21607 21296 21592 21236 21440 21312 21425 21303 21618 21437 21596 21586 21824 21682 22004 21672 22008 21705 22018 21583 21899 21408 21677 21033 21524 21242 21834 21356 21984 21539 22107 21645 22029 21389 21863 21344 21749 21214 21925 21378 22272 21422 22016 21185 21653 21236 21863 21453 22003 21618 22125 21261 21906 21100 22033 21307 21968 21220 21920 21162 21920 21445 21886 21281 21847 21211 21840 21193 22033 21156 21941 21191 21925 21301 21997 21271 21795 21303 21804 21289 21955 21273 21734 21134 21883 21468 21850 21178 21832 21282 21860 21240 21845 21088 21615 21547 21745 21305 21715 21289 22088 21368 21659 21159 22039 21633 21544 21302 21568 21840 21774 21185 21859 21525 22168 21425 21405 21177 22120 21412 21527 21433 21969 21698 21835 21715 21433 21977 21691 21475 21431 21863 21645 21708 21467 21799 21746 21579 21388 21912 21475 21609 21357 21971 21390 21736 21458 21809 21335 21591 21568 22065 21282 21747 21605 22009 21175 21900 21527 21876 21068 21853 21549 21904 21179 22087 21449 21975 21146 22173 21314 21753 21392 22026 21456 21826 21487 21989 21095 22040 21415 21909 21227 21937 21088 22067 21322 21762 21512 22001 21238 21878 21193 22116 21141 22087 21235 21910 21080 21880 21334 21888 21213 22059 21208 21708 21317 21903 21273 21831 21474 21724 21344 21956 21371 21928 21388 21844 21156 21955 21376 21936 21283 21885 21245 21808 21477 21842 21157 22090 21410 21657 21646 21647 21418 21921 21460 21629 21506 21981 21296 21571 21660 21470 21379 22083 21229 21625 21874 21563 21289 22147 21271 21553 21854 21417 21404 22145 21283 21217 21568 21632 21444 21306 21884 21596 21644 21856 21635 21318 21952 21466 21446 21679 21928 21304 21851 21724 21491 21722 21969 21287 21811 21588 21712 21431 22064 21673 21857 21461 22193 21397 22065 21296 21770 21545 21844 21307 22080 21175 21876 21538 21879 21193 22205 21155 21929 21504 21975 21113 22184 21372 21833 21536 21804 21293 22067 21741 20283 19909 20462 19776 20808 19719 20693 19915 20672 19911 22279 21608 22253 21355 22076 21632 20860 20044 20987 20076 20817 20325 20869 20176 21063 21547 22414 21710 22120 21562 22058 20400 21061 20545 21047 20582 21185 20551 21082 20600 22209 21653 22242 21516 21954 21445 21348 20687 21367 20849 21203 20683 21361 20797 21292 21093 22020 21525 22090 21396 21682 21504 21585 21019 21850 21224 21365 21401 21384 20992 21846 21319 21877 21812 21760 21324 21776 21714 21515 21323 22069 21425 21568 21830 21735 21330 21680 21703 21433 21323 21704 21899 21491 21657 21515 21827 21242 21844 21565 21511 21784 21801 21351 21552 21744 21776 21273 21962 21799 21645 21408 21935 21548 21772 21566 21975 21329 21602 21590 21964 21312 21678 21609 22061 21253 21628 21447 21981 21341 21893 21331 22145 21478 21862 21149 21892 21438 22231 21383 21984 21285 21689 21132 21850 21255 21941 21417 22145 21492 22103 21497 22113 21560 22140 21519 22120 21595 22152 21526 22109 21484 21980 21226 21912 21036 21958 21114 21923 21137 22171 21344 21787 21175 21893 21175 21959 21471 21994 21062 21939 21047 21977 21095 22103 21184 
21622 21685 21637 21650 21589 21776 21655 21571 21559 21754 21664 21624 21568 21863 21608 21725 21158 21872 21620 21753 21387 21615 21720 21810 21607 21546 21529 21833 21643 21792 21463 21241 21504 21812 21611 21800 21393 21696 21561 21847 21582 21757 21465 21683 21505 21904 21614 21793 21429 21568 21404 21817 21563 21837 21477 21760 21357 21984 21455 21849 21652 21824 21577 21808 21415 21553 21432 21740 21576 21899 21477 21895 21504 21893 21358 21783 21440 21720 21330 21733 21345 21594 21459 21801 21417 21724 21429 21589 21290 21703 21463 21675 21479 21652 21408 21799 21447 21648 21392 21765 21272 21696 21475 21688 21543 21784 21445 21769 21472 21752 21394 21636 21474 21744 21280 21837 21384 21608 21463 21657 21232 21845 21436 21802 21624 21639 21401 21892 21399 21618 21616 21655 21333 21893 21457 21512 21435 21769 21472 21669 21592 21524 21492 21819 21367 21600 21688 21621 21349 21866 21429 21659 21668 21644 21379 21863 21467 21570 21601 21556 21300 21702 21543 21497 21409 21736 21692 21424 21637 21622 21572 21707 21742 21382 21665 21639 21622 21623 21735 21585 21648 21702 21463 21619 20581 20312 20632 20707 20449 20632 20839 20535 20712 21848 21868 21689 21921 21363 21812 21654 21769 21548 21826 21552 21721 21652 21656 21510 21747 21420 21701 21587 21741 21559 21841 21442 21705 21538 21728 21540 21826 21929 21781 21572 21688 21440 21834 21443 21799 21550 21765 21468 21847 21259 21825 21498 21681 21497 21856 21324 21856 21367 21748 21512 21755 21481 21863 21465 21767 21447 21752 21415 21824 21402 21779 21597 21741 21378 21841 21366 21824 21382 21741 21463 21831 21258 21806 21400 21881 21463 21688 21317 21775 21512 21818 21467 21779 21234 21800 21333 21772 21390 21864 21248 21792 21387 21712 21352 21722 21260 21738 21361 21819 21405 21606 21517 21797 21432 21750 21388 21812 21494 21831 21516 21764 21485 21740 21490 21745 21345 21798 21403 21658 21483 21731 21309 21768 21411 21641 21411 21705 21207 21792 21506 21644 21394 21792 21370 21597 21580 21747 21348 21622 21514 21726 21330 21625 21568 21751 21160 21760 21536 21632 21443 21852 21549 21628 21476 21873 21596 21623 21543 21874 21528 21562 21467 21821 21465 21537 21600 21848 21555 21586 21387 21488 21765 21677 21689 21641 21608 21477 21582 21661 21740 21632 20695 19936 20647 20801 20796 20992 20895 20884 20960 20870 21703 21723 21699 21709 21750 21624 21719 21729 21814 21633 21667 21530 21872 21495 21644 21541 21747 21641 21763 21591 21746 21604 21728 21511 21714 21497 21638 21464 21767 21544 21803 21586 21802 21574 21762 21472 21708 21349 21597 21423 21753 21479 21792 21522 21879 21544 21817 21411 21857 21308 21760 21442 21768 21563 21839 21440 21760 21363 21825 21303 21746 21465 21917 21552 21911 21416 21760 21285 21814 21440 21851 21478 21744 21445 21691 21399 21767 21424 21728 21420 21689 21422 21621 21148 21692 21327 21781 21361 21840 21273 21817 21346 21747 21457 21736 21400 21696 21381 21709 21432 21806 21394 21692 21356 21769 21397 21826 21499 21755 21344 21922 21414 21773 21455 21723 21338 21904 21418 21769 21466 21836 21367 21745 21473 21800 21444 21653 21408 21580 21574 21856 21427 21639 21408 21793 21645 21674 21427 21796 21524 21888 21391 21538 21470 21705 21696 21664 21488 21556 21366 21760 21441 21549 21665 21704 21619 21652 21331 21573 21642 21772 21478 21552 21513 21551 21666 21551 21600 21558 21701 21639 21521 21292 21672 21662 21618 21452 21607 21714 21657 21591 21652 21024 21177 21001 21121 21029 21249 21029 21120 21056 21976 21613 21703 21680 21870 21568 21638 21645 21806 21467 21601 21551 21769 21387 21584 21498 21818 21409 21632 21532 21756 21434 21721 21493 21849 21083 21745 21545 21768 21289 21804 21504 21788 21285 21804 21533 21735 21404 21825 21542 21700 21410 21805 21544 21641 21425 21849 21340 21782 21428 21779 21376 21877 21419 21696 21499 21680 21306 21670 21399 21783 21936 21836 21429 21739 21402 21815 21337 21681 21351 21753 21381 21810 21391 21752 21383 21832 21416 21730 21552 21669 21266 21634 21499 21786 21418 21831 21447 21750 21360 21740 21431 21691 21382 21750 21390 21717 21456 21760 21402 21700 21433 21789 21404 21803 21432 21676 21556 21723 21274 21653 21544 21688 21391 21785 21463 21656 21645 21649 21359 21698 21576 21616 21313 21868 21510 21755 21677 21690 21308 21644 21636 21654 21373 21856 21464 21159 21612 21664 21379 21448 21534 21623 21361 21628 21752 21520 21665 21772 21885 21546 21710 21592 21657 21705 21607 21455 21660 21639 21588 21553 21710 21507 21520 21512 21700 21379 21672 21656 21717 21564 21749 21484 21611 21564 21889 21441 21728 21627 21632 21550 21865 21015 21325 21131 21330 20931 21496 21176 21321 21195 21551 21622 21974 21654 22103 21544 21859 21471 21838 21554 21676 21462 21816 21453 21664 21493 21824 21482 21768 21461 21977 21490 21735 21393 21849 21431 21692 21482 21674 21379 21757 21449 21754 21261 21794 21393 21779 21477 21731 21350 21807 21362 21696 21427 21720 21410 21644 21434 21760 21483 21794 21360 21693 21483 21775 21409 21655 21444 21755 21346 21831 21477 21622 21393 21825 21472 21567 21500 21742 21486 21795 21534 21623 21287 21777 21541 21565 21632 21702 21381 21674 21653 21586 21824 21840 21532 21665 21589 21753 21545 21573 21664 21808 21562 21685 21455 21553 21617 21733 21647 21368 21729 21641 21721 21584 21412 21635 21728 21684 21549 21542 21694 21656 21679 21366 21573 21587 21757 21511 21672 21480 21752 21652 21719 21560 21627 21584 21833 21506 21746 21436 21703 21587 21910 21488 21612 21496 21870 21561 21672 21303 21833 21512 21863 21394 21870 21411 21761 21565 21901 21419 21651 21435 21752 21545 21923 21397 21721 21305 21845 21488 21760 21495 21762 21387 21733 21399 21706 21403 21845 21480 21831 21386 21776 21350 21788 21346 21774 21308 21762 21383 21779 21401 21512 21190 21514 21273 21607 21350 21692 21336 21570 21441 22191 21452 21747 21443 21734 21365 21713 21480 21760 21515 21895 21414 21546 21357 21720 21427 21719 21434 21658 21548 21929 21663 21910 21632 21697 21271 21547 21319 21670 21352 21623 21357 21618 21356 21523 21364 21674 21459 21680 21741 21778 21753 21442 21682 21505 21646 21579 21631 21553 21658 21625 21665 21609 21482 21446 21494 21370 21561 21472 21646 21545 21806 21657 21671 21623 21810 21603 21847 21572 21866 21505 21661 21482 21748 21376 21735 21520 21776 21523 21857 21572 21924 21497 21751 21442 21916 21293 21805 21499 21789 21543 21847 21507 21804 21242 21705 21471 21821 21414 21827 21339 21715 21392 21731 21467 21816 21365 21751 21305 21817 21287 21856 21361 21734 21415 21664 21403 21728 21413 21783 21463 21724 21465 21699 21463 21697 21415 21719 21412 21704 21469 21668 21416 21664 21252 21783 21493 21738 21368 21664 21477 21838 21400 21730 21436 21549 21724 21719 21376 21653 21431 21761 21620 21799 21416 21488 21711 21777 21472 21508 21367 21612 21784 21627 21740 21698 21671 21728 21768 21623 21740 21621 21712 21741 21652 21483 21646 21621 21753 21635 21654 21600 21861 21474 21616 21551 21787 21510 21763 21560 21828 21472 21760 21487 21825 21526 21529 21488 21839 21440 21704 21491 21849 21475 21616 21561 21911 21517 21638 21477 21856 21314 21727 21448 21784 21470 21741 21433 21744 21430 21784 21384 21717 21274 21847 21424 21817 21454 21885 21339 21776 21511 21771 21313 21765 21472 21736 21301 21821 21521 21683 21344 21831 21465 21772 21574 21767 21370 21704 21467 21679 21708 21806 21419 21555 21344 21780 21600 21550 21629 21760 21377 21636 21667 21689 21492 21885 21510 21728 21634 21655 21301 21550 21655 21636 21335 21777 21744 21658 21804 21646 21641 21607 21643 21565 21575 21701 21652 21496 21703 21735 21661 21547 21735 21469 21785 21649 21636 21505 21789 21529 21650 21647 21748 21386 21742 21543 21435 21493 21769 21507 21777 21525 21708 21388 21888 21554 21618 21509 21963 21433 21792 21611 21801 21462 21857 21475 21613 21479 21902 21487 21845 21454 21364 21404 21814 21398 21838 21463 21749 21316 21745 21431 21721 21420 21830 21410 21866 21312 21724 21357 21785 21475 21765 21444 21752 21361 21745 21463 21718 21353 21860 21423 21639 21450 21820 21489 21749 21432 21687 21457 21773 21408 21595 21606 21719 21277 21767 21571 21821 21669 21652 21451 21813 21445 21638 21558 21748 21386 21552 21611 21652 21319 21787 21541 21943 21686 21582 21354 21553 20621 20551 20576 20814 20775 20434 20864 20756 20599 21863 21912 21732 21792 21809 21720 21626 21893 21495 21669 21681 21669 21549 21751 21653 21588 21623 20912 20627 20960 20845 20966 20877 21128 20759 21036 20886 21884 21625 22026 21591 21753 21623 21963 21417 21863 21580 21671 21479 21819 21573 21884 21482 21831 20912 21230 20713 21219 20954 21303 20948 21184 20880 21423 21665 21939 21569 21825 21498 21858 21376 21651 21308 21711 21411 21833 21469 21820 21384 21722 21440 21389 21081 21317 21036 21392 21146 21442 21118 21495 21610 21849 21533 21897 21386 21943 21472 21751 21454 21847 21312 21644 21429 21809 21323 21632 21616 21613 21205 21504 21344 21406 21408 21488 21201 21723 21285 21752 21633 21654 21707 21541 21527 21856 21588 21633 21648 21400 21660 21681 21664 21575 21824 21661 21486 21572 21760 21709 21691 21460 21613 21658 21755 21551 21643 21464 21620 21593 21705 21607 21689 21538 21609 21705 21698 21549 21884 21595 21808 21547 21783 21441 21798 21498 21739 21466 21705 21300 21703 21367 22208 21435 21732 21477 21691 21408 21816 21425 21896 21422 21751 21328 21800 21453 21699 21456 21687 21332 21696 21367 21799 21444 22074 21504 21824 21419 21800 21376 21749 21537 21781 21508 21728 21413 21717 21468 21804 21411 21812 21495 21746 21420 21740 21626 21719 21433 21828 21436 21780 21496 21646 21512 21749 21448 22189 21299 21655 21584 21850 21482 21671 21496 21627 21447 21587 21713 21848 21474 21691 21399 21624 21574 21588 21724 21817 21409 21624 21425 21518 21520 21647 21730 21659 21680 21487 21569 21607 21719 21657 21644 21540 21544 21632 21732 21670 21606 21461 21708 21657 21777 21616 21682 21369 21728 21671 21799 21445 21575 21507 21805 21608 21713 21443 21774 21563 21885 21396 21580 21473 21881 21506 22342 21412 21847 21561 21789 21376 21850 21539 21936 21416 21620 21487 21910 21297 21671 21512 21866 21399 21807 21488 21835 21385 21718 21465 21742 21484 21721 21386 21788 21362 21829 21459 21838 21383 21745 21457 21792 21496 21794 21493 21833 21429 21680 21478 21751 21462 21888 21480 21737 21392 21719 21456 21768 21424 21825 21459 21713 21431 21842 21604 21680 21383 21802 21513 21655 21394 21825 21508 21740 21750 21640 21389 21660 21760 21628 21664 21815 21464 21613 21515 21808 21420 21509 21687 21671 21447 21668 21578 21568 21586 21495 21819 21613 21689 21635 21717 21473 21621 21655 21351 21562 21653 21540 21540 21651 21696 21536 21797 21648 21762 21560 21761 21521 21735 21591 21680 21384 21824 21536 21633 21572 21813 21634 21851 21576 21701 21491 21905 21455 21748 21552 21776 21456 21912 21451 21752 21473 21826 21390 21866 21510 21753 21554 21917 21591 21902 21588 21520 21469 21862 21399 21783 21420 21844 21489 21725 21432 21840 21380 21720 21565 21734 21333 21785 21465 21730 21287 21795 21309 21782 21418 21743 21349 21783 21391 21479 21520 21838 21462 21840 21420 21666 21491 21752 21417 21776 21399 21689 21495 21722 21339 21788 21510 21706 21371 21842 21447 21541 21547 21712 21472 21697 21465 21559 21617 21735 21314 21843 21337 21600 21621 21541 21570 21687 21317 20658 20480 20696 20731 20807 20459 20931 20553 20816 20819 21837 21648 21792 21893 21845 20837 20919 20691 20823 21200 20885 20983 21005 20961 21002 21946 21784 21824 21873 21701 21656 21176 21031 21132 21120 21189 20944 21352 21044 21225 21897 21889 21642 21929 21576 21738 21263 21403 21066 21464 21235 21301 21223 21465 21069 21533 21735 21761 21653 21880 21385 21688 21431 21556 21317 21718 21239 21669 21366 21576 21335 21877 21571 21742 21569 21779 21394 21853 21549 21646 21515 21846 21338 21843 21463 21701 21401 21897 21376 21703 21549 21726 21424 21819 21330 21771 21300 21872 21537 21713 21424 21801 21336 21809 21424 21784 21457 21803 21440 21707 21588 21807 21440 21728 21484 21744 21397 21709 21504 21760 21351 21725 21440 21654 21319 21833 21467 21753 21426 21781 21378 21802 21461 21662 21415 21536 21472 21866 21489 21736 21401 21627 21570 21557 21326 21700 21657 21890 21674 21879 21682 21878 21714 21849 21678 21895 21644 21883 21687 21904 21671 21769 21323 21616 21417 21696 21473 21788 21704 21801 21440 21657 21513 21801 21717 21558 21637 21357 21688 21581 21800 21713 21669 21528 21534 
34152 34897 34290 34309 33776 35603 34647 33537 33456 35726 34480 34187 33272 36964 34059 35494 39463 37067 34248 35776 41753 34693 35265 36199 34206 33206 32933 36461 34530 35845 42632 40816 32777 36123 34246 36025 41666 35162 33504 36730 33888 35911 42571 35245 32613 37008 34343 35940 42189 33689 41778 36688 33703 36632 42744 35789 41619 38338 42791 37127 34504 36231 33702 36005 42088 33637 42010 35952 33602 37271 42794 37612 32627 37072 41650 35192 41569 35571 42271 36791 41812 37061 42306 36992 42995 36771 41952 34720 35697 36100 40301 36822 42124 36509 41372 37132 42352 36444 42336 36112 42743 37454 42720 36416 42712 34636 41655 40594 36424 35816 41681 35138 42496 35814 40371 36933 41597 34250 42568 34914 40088 36920 42340 36471 34275 34361 41767 37329 42000 34421 33964 34563 41139 37417 42477 33062 42199 36072 42464 35053 33773 32788 42601 36827 41756 34074 34846 34243 41299 37227 42272 35003 34608 34361 41497 37296 42771 33813 33818 33239 40598 35351 33333 42816 42164 35799 35079 41868 34611 34230 33448 35188 35744 41576 34875 34401 34220 34320 35612 33672 34164 35056 42616 34568 33037 40699 33732 34436 42184 33796 35975 32599 34376 36629 37051 35080 37422 41697 36516 34576 35732 33319 36269 33205 35296 34400 34422 32698 35596 42058 35431 33797 35680 33567 36489 42197 35489 33053 35174 33074 36256 37575 36028 33536 34800 41997 36855 42338 36553 33482 35613 42586 37144 40493 36592 42993 35125 42924 36998 41148 36922 41760 35922 32736 35804 42743 37364 42658 36155 42470 36024 42116 36552 41876 36180 34096 35694 41429 36835 41638 36524 41628 36039 42658 36936 40369 36561 41772 37449 42732 35237 40983 36282 32755 36256 42707 36211 40233 36285 41232 36058 41814 37146 40057 36081 41783 35352 41312 35673 40324 35823 41448 36776 42057 34359 32928 36007 42128 36056 41698 36487 42946 36952 32933 35488 42888 35961 42760 35944 41248 36386 41989 34913 42816 35840 41090 35897 41973 34693 41893 35472 40088 36072 32640 34262 41544 36136 41668 34368 33670 35640 41261 34530 32784 35419 41024 34588 33317 35767 39351 35632 32960 33932 42192 37103 33520 34288 42504 37287 34035 34312 33255 36868 33012 33368 42546 36864 42644 33408 33686 36576 33456 33576 41633 42944 36066 34976 34996 34344 33954 42600 34176 34685 35608 34049 34393 36901 33933 35301 35446 37268 36789 36336 37152 36248 35289 35490 35088 35310 35752 34228 35399 35392 36340 34198 34630 33014 36730 43063 34765 33176 35617 34376 35632 33959 35540 33938 35222 32865 35063 42892 34656 42390 36136 33193 36188 33719 36097 33644 35490 42414 35539 41401 34325 42234 36114 42833 36204 32878 37121 33238 36305 41961 37044 40992 35703 42165 35963 33644 36752 42104 35766 41548 36601 40997 35857 42581 37898 33301 37398 42005 35749 40672 36576 42086 37181 42791 35833 42332 35447 41894 36114 41937 35584 42074 35320 42165 34588 39269 35229 41288 36192 41472 36722 40553 36624 41270 35984 42384 35805 41736 35152 41568 35623 42108 36636 41682 35338 41466 36039 41808 36636 43118 36281 41160 37644 42074 36218 42683 35840 41271 37350 42120 36073 42593 36913 41763 35880 42549 36386 42250 34851 41671 34039 33538 36581 42184 34729 41680 36249 34561 34740 42086 36300 32920 36804 41964 33384 42577 35490 34880 34445 42557 33664 41480 35720 42180 33761 34482 35015 34212 34347 41081 33883 34284 35757 42697 33520 32729 33397 34484 33484 33685 33331 35040 34399 32786 40588 34919 34713 34082 42325 34496 35144 34576 33916 34336 37623 39727 37787 38930 38097 40210 38156 38828 38208 38240 34394 35187 34669 37088 33426 34225 34458 36284 42707 34248 33485 35685 41748 33880 42842 36723 41888 34344 33043 35748 42224 35712 42903 37111 38820 35770 33296 35575 40712 36456 32560 35896 40609 36464 33265 35554 41858 36654 33280 34903 41771 36631 33219 34241 41949 37072 41352 36184 42088 36187 41347 37399 42229 35174 43027 35040 40849 34989 41866 36329 37495 36697 42233 36025 41856 36738 41306 35092 41472 36096 41613 36456 41955 36001 41706 36729 41984 35688 33184 34624 40233 34400 42983 36315 42068 36903 42503 36087 41366 35907 42304 35441 41575 36032 41816 35642 42256 35763 41842 35303 42220 36442 41916 36583 42167 35139 33313 35410 40466 34756 33141 34784 41847 36264 42663 34805 34491 34327 41635 35240 33560 33912 40744 37248 32860 35789 34960 34983 40887 34647 34164 34456 41716 36938 42520 39874 34368 34420 41481 42540 33576 34297 41356 34648 35682 32725 34464 35757 37320 33357 35233 33770 34504 35136 34150 42540 34970 34400 33673 33189 35233 32707 32578 32547 34875 41505 34960 34448 35293 33527 35674 42786 34568 33494 36948 42226 35602 34450 33993 33349 36883 37923 41305 39403 41224 37175 42916 39856 41257 40149 33783 34176 38089 34636 39488 33353 36801 42880 37039 33373 34731 42450 36608 42577 34805 42853 36585 42779 35994 42537 38501 42904 36002 41655 37056 42368 35372 42740 35125 41523 36243 42408 36133 40486 36208 41667 36171 42727 35840 41386 36715 41488 35144 42112 35588 41825 34704 42183 35762 42882 36310 41352 35436 42850 36364 41876 34961 42165 36231 41289 36880 42777 34617 41573 36636 42496 34119 42901 36089 42928 36420 33275 34279 40673 36007 33250 33559 33953 35053 41552 35058 34521 33632 36105 36484 33159 34477 33793 35730 33288 33501 34346 36025 33536 34862 42580 33633 34048 35478 34645 41482 35675 34375 35367 33559 41756 34560 35248 34825 33398 33094 35049 34441 35013 41587 33915 33723 35896 32899 34568 42571 36024 34448 35410 33356 34334 33513 36480 32664 35479 42247 35555 33804 37307 42712 34497 42761 37456 33605 34592 40909 36804 32776 36914 41687 37388 42023 35872 33680 37300 42224 34821 42294 36013 33309 37448 41873 35700 40912 36952 42703 35784 43019 35905 41773 35840 41910 35488 41944 37003 42720 36944 41708 35952 41395 36292 41261 36183 40960 35812 41710 36171 41875 33039 39618 33031 40353 34393 41319 35316 41122 33730 42085 40882 42692 36054 42304 35848 41595 35471 42642 35776 32960 37169 42044 33600 41504 35552 42140 35757 42233 34891 33292 37532 34951 37356 34130 34908 40511 33634 41056 34985 41290 34659 41545 34400 41411 33261 41352 35061 42448 35017 35749 35792 35840 42167 35099 32595 34384 33724 34519 33229 34471 34274 34529 34055 42697 42697 43296 42016 33838 42337 34842 33240 36235 34618 34805 34349 36141 34048 36776 33573 36890 32678 34612 42676 35961 41337 35920 32748 35549 32948 36667 33556 37392 43041 36225 42193 37744 40913 36593 43110 36483 33379 36737 32784 36107 40416 35414 42812 36874 42048 36773 41415 35573 41528 35780 42690 36608 41636 36160 40912 36663 40795 36899 41500 35815 42101 34780 41913 35579 41984 36331 42673 35765 42562 35408 42634 35315 42083 35754 41878 35362 42707 34957 41898 34771 40056 36249 42934 35936 41532 34766 42657 37029 41808 35684 42268 33760 35367 35456 41307 34800 42234 35860 34185 36185 41941 42963 35800 35808 42441 33004 41580 34432 35840 34464 35598 34944 34821 35251 35656 34395 35575 34272 35033 35737 34432 42771 34864 34245 35764 34253 34465 33739 36848 42600 34342 33485 36008 32777 35549 33383 36311 42448 35756 43021 36708 33062 32964 42464 37142 42135 35392 42843 37109 42739 34373 33447 37410 33074 34215 42604 36983 40905 35914 42272 36177 42740 36084 42261 35812 42200 36176 41553 35636 40519 37045 41988 36706 42573 37652 41472 35925 32912 35763 40844 35953 42451 35811 40876 36790 32916 34792 41098 36864 42637 36136 33664 35748 41635 35356 42668 35392 35200 36321 42183 33729 41015 36071 33828 33346 34387 35405 41414 34470 34653 34973 42735 37658 32888 35172 34133 34580 40784 33687 34564 34149 41249 36043 35530 34560 36194 34551 34324 34112 34408 33600 33633 35040 34391 42752 35575 35668 34756 33345 35564 42706 36315 34422 34145 32529 36007 33076 34253 34572 35616 41637 36041 33357 42272 43249 36131 32768 35663 33001 35108 41637 37191 33380 34032 32673 37990 42336 36185 34272 36145 42520 37081 42746 34610 42760 37700 43116 37062 42600 41920 42198 36648 41840 36992 42709 36096 40896 35860 42304 35734 42073 36805 41885 37253 40816 35687 41591 36276 42696 36040 42228 36022 41456 35880 42642 35668 41430 37079 42374 34757 42329 36747 42785 36096 42144 35377 42352 36239 41748 34308 34000 35380 40645 36060 33617 36464 34800 34376 42410 36647 42376 34631 33392 35555 41637 33476 34140 34349 41035 36345 33265 37766 35058 33804 41339 33559 33458 32640 32657 35596 35256 42005 36208 34862 33385 36956 37399 35525 35888 36213 35328 34322 37125 43079 35092 34792 34701 33380 35780 34539 33689 34301 36480 33548 37018 36213 37396 36472 38960 35212 38037 36503 37288 34408 38515 34103 35768 34401 38072 42160 37339 33811 34772 42752 36838 33692 37120 42820 36952 36608 40384 34905 40059 37415 41040 37288 39552 36312 42304 34912 37737 33584 36284 42969 37107 41397 34800 40885 35688 41952 36855 42789 36768 41592 35672 42050 42112 38880 41152 38300 41649 39505 42358 39440 43216 34493 36738 33280 37126 41704 38160 42569 36203 42551 37147 40802 34660 42136 36490 41219 34322 33965 34181 39864 32717 40969 42256 42049 42967 40141 35729 40640 35944 34187 34456 35256 33197 32989 36554 33770 34077 34193 41644 34921 34777 34449 33671 36176 34770 42850 33859 35392 35329 35114 42368 34597 34551 35888 33559 34370 42388 34498 33859 35111 34140 34949 33024 33995 35089 34954 33408 37136 34086 36026 33409 35945 42168 36422 42984 36054 42580 35511 40721 35480 41696 40634 42608 35765 42699 35460 41706 36574 42087 37418 42276 36189 40960 36320 42565 35416 42240 35393 41062 35127 41672 36524 42244 39453 32679 36151 42176 36371 41352 36022 33088 35815 32663 35153 41953 35634 42608 36544 41992 36514 43056 35953 42088 35942 34330 35397 42216 36688 42322 36126 42869 34865 32689 35632 42251 40758 41050 34904 33554 36682 42806 35189 42818 34788 42410 34124 35141 36647 42597 35456 41897 34517 33559 33616 35357 36408 41868 34517 41971 33318 32616 34492 35342 34688 34657 42954 33844 34090 35392 34577 34360 33079 33044 33920 35361 34724 34019 42404 35535 34604 35748 34018 34730 41589 35568 34854 36224 42325 34072 32652 36215 34024 35130 42231 36224 33657 37260 41752 34037 42455 37497 32718 41729 42161 37128 33587 36054 41328 37033 33259 37440 42000 34456 42947 37713 40783 35127 32684 36859 41961 36747 42683 37008 41704 35624 42577 36074 42816 35732 41639 36306 41464 36777 42536 37027 41768 35904 42376 36184 42864 36308 42930 36896 42248 35034 42664 36200 42544 37209 42728 35937 41539 35721 42259 35972 41928 36644 42530 35532 42284 36864 34017 34636 41634 36457 32887 34507 41560 36637 32722 35502 35760 34267 41707 34904 35440 34368 34396 36405 42496 34596 32903 35968 42081 33121 34964 34819 42375 34934 33648 33256 33574 42874 36845 34336 34964 34240 35284 42512 34613 34600 41508 33793 34454 33047 32968 34365 34816 32896 36019 34284 35504 33381 35476 32833 35536 33950 34624 41459 36525 33004 34057 33424 36256 34165 36832 33624 35046 42808 37563 42736 35973 33210 35567 42240 37632 42588 36039 42576 36680 41841 37260 32865 35693 33290 37484 34023 37317 33815 32676 42544 37232 41984 36341 42112 36898 42804 35889 42132 36754 41536 35565 33667 35460 41177 36243 42608 35725 40760 36332 41077 36169 42056 36170 41420 36308 41939 43192 33132 36611 42570 36774 42133 34890 42808 36039 42057 35958 41917 35313 42987 35748 41368 36282 32816 35048 41705 36836 42506 33564 33301 34978 42384 35304 42551 33896 34057 35591 40834 36922 41328 34064 34216 33149 33337 34968 40960 34048 31446 34112 34880 35608 42528 37224 32784 35340 35698 36724 34320 35820 37191 36775 35992 36934 34418 35803 39680 36581 37744 37850 37325 37680 37957 35985 36284 37025 35209 34447 39472 38232 39192 38882 39899 37101 41397 38304 40306 37457 37123 34440 37600 33664 35515 40534 42198 38676 42618 40616 41088 40493 42836 38850 33408 35565 35566 34536 37033 41736 35184 42264 33669 40896 35588 40440 34971 41542 33859 41216 37394 33673 35665 33478 35806 41623 37204 33536 34452 32883 36602 41285 36938 42705 35462 41826 37520 41408 35536 33437 35456 41894 36792 41095 36137 40744 37104 33152 35104 41872 36480 41175 36465 41947 36168 42370 36608 42103 35600 33733 36372 42086 35597 42788 35840 41805 35622 32512 35328 41472 35818 42064 34839 41078 36807 42741 36152 42053 36227 41452 36448 42573 35072 42062 33280 42296 37268 42841 35824 41851 34745 33429 33344 41078 35257 34583 36983 34860 37212 34884 37104 35264 36768 35008 37268 34492 37249 35154 37110 34924 35744 41153 34304 41964 35162 42524 36344 35127 36170 42071 34896 32807 36065 35367 33431 34216 41515 35184 33824 36002 35209 34726 32887 33089 
22711 22601 22478 22472 22644 22546 22573 22509 22723 22455 22519 22569 22759 22436 22572 22471 22720 22473 22603 22386 22768 22543 22726 22299 22768 22489 22791 22420 22666 22378 22713 22449 22836 22406 22592 22381 22839 22473 22772 22411 22720 22415 22800 22472 22772 22338 22701 22421 22784 22428 22918 22477 22808 22244 22730 22342 22784 22505 22769 22567 22727 22325 22572 22298 22703 22503 22799 22518 22822 22342 22794 22217 23072 22258 22771 22253 22677 22353 22760 22318 22787 22352 22673 22295 22711 22343 22650 22429 22629 22329 22688 22343 22821 22321 22808 22351 22725 22246 22648 22183 22693 22263 22701 22238 22641 22405 22680 22352 22652 22414 22636 22359 22656 22367 22791 22469 22760 22485 22710 22444 22693 22475 22727 22402 22729 22400 22766 22400 22712 22383 22660 22391 22646 22439 22699 22400 22807 22445 22635 22359 22656 22473 22740 22453 22711 22589 22805 22579 22746 22749 22621 22433 22551 22709 22596 22441 22874 22621 22596 22730 22661 22821 22883 22519 22623 22584 22686 22639 22696 22826 22628 22745 22586 22685 22634 22855 22473 22649 22772 22690 22599 22679 22581 20700 20940 21223 21000 21339 21255 21248 21332 21398 21128 23383 23035 22953 22917 23049 22615 23032 22596 22626 22713 22970 22489 22925 22730 22880 22702 22974 22387 22980 22535 22818 22593 23015 22336 22903 22538 22676 22574 22930 22328 22925 22497 22727 22567 22774 22374 22934 22418 22874 22600 22855 22416 22928 22431 22848 22532 22881 22401 22964 22534 22811 22581 22713 22439 22968 22391 22851 22578 22714 22631 22956 22359 23002 22515 22773 22501 22896 22220 22866 22357 22824 22509 22824 22409 22845 22371 22739 22384 22745 22520 22828 22416 22841 22438 22813 22404 22861 22362 22939 22379 22757 22395 22758 22344 22838 22412 22806 22481 22785 22273 22793 22484 22826 22493 22720 22392 22824 22360 22721 22503 22684 22471 22779 22332 22887 22467 22744 22468 22780 22470 22849 22445 22759 22503 22808 22389 22745 22528 22741 22410 22868 22529 22710 22575 22689 22449 22548 22705 22659 22428 22632 22631 22757 22483 22807 22602 22652 22553 22808 22558 22598 22345 22777 22607 22571 22391 22857 22493 22535 22483 22813 22678 22528 22353 22861 22499 22576 22422 22807 22631 22631 22400 22509 22700 22720 22773 22567 22640 22423 22711 22508 22922 21111 21544 21267 21492 21286 21353 21562 21714 21688 21750 23133 23081 22831 22812 22568 22761 22657 22864 22673 22914 22661 22752 22665 22897 22437 22776 22630 22702 22540 22818 22561 22832 22631 22879 22520 22818 22409 22728 22656 22603 22422 22704 22476 22823 22488 22884 22512 22829 22440 22760 22390 22749 22352 22845 22423 22953 22417 22976 22528 22836 22400 22695 22285 22796 22529 22887 22569 22924 22602 22796 22341 22884 22343 22833 22528 22917 22404 22806 22380 22615 22318 22826 22443 22869 22355 22790 22289 22721 22311 22754 22400 22835 22302 22848 22264 22947 22360 22841 22434 22752 22355 22667 22371 22797 22443 22806 22417 22727 22356 22701 22421 22777 22510 22791 22440 22642 22311 22692 22512 22725 22403 22725 22327 22756 22576 22730 22471 22757 22325 22837 22509 22695 22400 21997 22285 22803 22541 22770 22403 22790 22493 22753 22438 22700 22632 22703 22656 22697 22464 22592 22359 22819 22560 22698 22462 22493 22715 22711 22555 22515 22391 22814 22505 22677 23033 22645 22777 22604 22448 22637 22625 22705 22441 22539 22693 22495 22689 22506 22743 22428 22775 22695 22582 22400 22556 22640 22680 22400 22676 22665 22734 21824 21583 21735 21855 21671 21850 21746 22059 21730 21885 22868 23143 22627 22800 22724 22842 22553 22631 22593 22886 22383 22743 22484 22960 22470 22799 22567 22924 22473 22755 22578 22770 22836 22773 22535 22856 22372 22810 22416 22810 22230 22846 22509 22722 22249 22794 22533 22757 22333 22859 22545 22573 22432 22860 22412 22716 22516 22960 22225 22846 22341 22784 22331 22855 22360 22627 22457 22768 22345 22794 22546 22651 22342 22832 22276 22716 22336 22769 22272 22735 22456 22733 22784 22769 22339 22632 22337 22785 22402 22740 22532 22710 22375 22733 22446 22727 22305 22786 22387 22653 22406 22813 22413 22663 22487 22687 22443 22637 22519 22732 22317 22764 22422 22616 22392 22869 22431 22605 22561 22726 22557 22799 22480 22583 22508 22836 22468 22769 22634 22624 22941 22929 22434 22583 22508 22740 22325 22436 22709 22610 22535 22729 22511 22462 22361 22755 22528 22528 22719 22610 22624 22546 22759 22439 22744 22651 22607 22515 22855 22491 22527 22602 22758 22621 22651 22575 22647 22528 22760 22583 22529 22500 22752 22464 22736 22528 22616 22379 22716 22557 22624 22476 22720 22368 22712 22536 22745 22391 22867 22472 22541 22537 22186 21799 22231 21960 22189 21905 22351 21885 22284 22729 23005 22436 23057 22499 22656 22487 22946 22476 22860 22461 22951 22407 22860 22384 22765 22416 22806 22313 22743 22297 22741 22445 22790 22332 22832 22365 22881 22506 22695 22258 22831 22361 22703 22183 22792 22324 22722 22364 22742 22451 22842 22412 23031 22511 22695 22396 22758 22415 22632 22320 22767 22471 22609 22396 22697 22383 22712 22450 22730 22308 22823 22423 23141 22446 22621 22489 22624 22549 22576 22433 22789 22421 22570 22450 22772 22472 22409 22646 22513 21956 22786 22454 22624 22469 22874 22467 22629 22321 22864 22432 22575 22336 22752 22530 22629 22472 22540 22449 22637 22722 22380 22746 22645 22723 22391 22530 22633 22666 22659 22639 22473 22694 22606 22743 22852 22647 22596 22839 22533 22710 22394 22660 22521 22802 22432 22635 22390 22855 22587 22731 22289 22668 22537 22866 22428 22547 22339 22813 22516 22733 22221 22823 22437 22870 22493 22675 22276 22804 22412 22809 22505 22733 22272 22728 22513 22882 22437 22779 22315 22740 22305 22868 22422 22744 22395 22721 22405 22605 22516 22620 22301 22837 22280 22872 22325 22784 22436 22720 22396 22775 22350 22348 22101 22368 22176 22448 22024 22392 22137 22375 22109 22789 22461 22684 22464 22816 22487 22755 22464 22664 22329 22469 22356 22596 22339 22726 22413 22711 22646 22760 22662 22510 22325 22740 22803 22479 22384 22541 22405 22588 22347 22604 22449 22592 22608 22645 22506 22712 22587 22697 22561 22736 22551 22663 22829 22582 22748 22647 22806 22643 22616 22640 22731 22603 22724 22610 22805 22600 22759 22483 22684 22433 22617 22389 22707 22284 22599 22476 22784 22549 22733 22552 22890 22452 22820 22502 22704 22345 22768 22226 22644 22328 22792 22487 22873 22435 22881 22515 22717 22713 22548 22263 22785 22448 22825 22481 22892 22263 23171 22274 22737 22418 22737 22343 22706 22437 22776 22384 22805 22379 22708 22382 22718 22112 22745 22438 22800 22336 22680 22421 22704 22483 22713 22368 22674 22421 22615 22453 22772 22391 22664 22392 22601 22496 22653 22492 22587 22373 22758 22563 22588 22575 22643 22321 22776 22427 22641 22345 22468 22689 22755 22507 22428 22336 22818 22625 22588 22323 22489 22599 22695 22371 22721 22772 22329 22765 22452 22641 22379 22480 22505 22693 22496 22733 22496 22725 22527 22601 22359 22768 22560 22762 22586 22709 22506 22784 22409 22608 22403 22794 22448 22705 22386 22920 22429 22759 22371 22801 22423 22725 22348 22893 22405 22723 22384 22733 22468 22634 22353 22749 22336 22656 22407 22901 22299 22671 22419 22792 22345 22777 22343 22589 22413 22807 22339 22639 22347 22790 22308 22511 22374 22705 22213 22540 22406 22780 22539 22737 22489 22720 22326 22674 22375 22713 22423 22719 22400 22535 22352 22744 22313 22669 22433 22562 22273 22773 22457 22585 22564 22632 22466 22379 22621 22581 22301 22721 22455 22466 22332 22712 22505 22679 22681 22624 22465 22764 22470 22455 22295 22685 22732 22405 22757 22511 22571 22478 22761 23041 22673 22695 22557 22420 22795 22552 22627 22528 22766 22393 22713 22568 22621 22423 22756 22369 22744 22487 22681 22360 22821 22471 22564 22543 22803 22195 22791 22551 22759 22407 22900 22276 22759 22503 22769 22281 22805 22514 23296 22445 22816 22358 22779 22284 22765 22315 22805 22341 22709 22425 22700 22230 22729 22267 22710 22392 22713 22260 22693 22293 22721 22456 22829 22341 22737 22379 22649 22336 22634 22458 22672 22263 22723 22388 22624 22471 22678 22445 22691 22385 22606 22325 22738 22464 22757 22455 22745 22413 22728 22496 22552 22447 22694 22487 22375 22583 22656 22506 22824 22469 22668 22615 22579 22427 22725 22468 22507 22321 22745 22332 22461 22597 22511 20747 20930 21168 20929 21156 21149 21369 21234 21411 21303 23143 23079 23059 22666 23002 22732 22748 22716 22984 22784 22804 22584 22766 22534 22799 22520 22634 21197 21491 21125 21711 21399 21721 21400 21797 21488 21812 22976 23143 22717 23148 22535 22992 22569 22969 22342 22969 22639 22889 22542 22917 22568 23053 22339 21742 21479 21973 21449 22057 21586 22106 21673 22021 22758 23073 22813 22912 22553 22929 22452 22965 22418 22805 22329 22701 22428 22775 22367 22776 22484 22824 21725 22126 21864 22223 21956 22237 21992 22290 21963 22922 22489 22560 22512 22720 22545 22717 22558 22638 22541 22695 22509 22741 22611 22707 22618 22472 22212 22475 22001 22322 22372 22368 22166 22578 22144 22426 22541 22630 22772 22787 22416 22831 22383 22498 22696 22311 22646 22480 22614 22541 22796 22494 22608 22611 22661 22491 22432 22486 22689 22587 22622 22384 22615 22503 22770 22541 22743 22486 22626 22231 22674 22504 22778 22539 22801 22413 22748 22357 22656 22257 22593 22231 22668 22283 22756 22345 22848 22403 22848 22487 22868 22462 22679 22450 22704 22503 22929 22451 22843 22309 22778 22421 22723 22354 22743 22354 22720 22415 22725 22319 22704 22277 22755 22241 22777 22242 22641 22254 22704 22328 22518 22414 22694 22373 22702 22441 22731 22405 22734 22402 22672 22349 22663 22364 22623 22951 22592 22259 22639 22465 22740 22539 22586 22497 22588 22372 22692 22304 22786 22561 22666 22415 22614 22378 22432 22350 22868 22516 22694 22360 22556 22428 22488 22575 22805 22539 22551 22523 22439 22428 22436 22792 22502 22871 22412 22599 22477 22625 22652 22695 22448 22413 22432 22711 22505 22686 22353 22595 22416 22765 22649 22660 22305 22666 22552 22822 22471 22737 22383 22868 22444 22717 22214 22662 22435 22797 22330 22574 22310 22794 22422 22711 22313 22791 22486 22660 22368 22745 22426 22921 22377 22641 22383 22939 22211 22531 22429 22751 22336 22438 22400 22737 22400 22700 22347 22724 22394 22790 22327 22765 22310 22722 22405 22856 22454 22728 22457 22705 22391 22847 22393 22617 22382 22633 22407 22646 22420 22585 22443 22681 22303 22647 22441 22659 22184 22700 22389 22670 22434 22741 22454 22551 22293 22776 22500 22498 22596 22604 22350 22486 22639 22703 22807 22638 22563 22498 22313 22769 22393 22648 22674 22581 22285 22473 22625 22528 22466 22408 22755 22407 22573 22589 22768 22784 22663 22537 22535 22487 22712 22535 22573 22608 22784 22554 22663 22523 22653 22285 22848 22488 22535 22513 22715 22499 22773 22532 22606 22460 22811 22393 22671 22482 22753 22272 22808 22499 22500 22445 22888 22217 22791 22519 22839 22390 22820 22283 22712 22521 22659 22295 22713 22331 22618 22555 22725 22193 22859 22357 22689 22364 22699 22275 22752 22407 22734 22417 22693 22463 22757 22331 22667 22422 22730 22229 22841 22215 22629 22351 22720 22253 22632 22405 22728 22290 22737 22382 22644 22464 22667 22281 22760 22389 22567 22457 22664 22431 22749 22381 22726 22441 22613 22563 22667 22517 22997 22487 22709 22442 22706 22393 22395 22612 22621 22348 22732 22422 22559 22606 22531 22421 22832 22424 22401 22637 22647 20560 21143 20927 20998 21209 21227 20993 21479 21191 23023 23149 22968 22593 22907 22939 21149 21689 21380 21485 21632 21622 21511 21719 21588 21655 23048 23063 22615 22912 22838 21600 21565 21973 21388 21994 21831 22023 21826 22156 21928 23168 22876 22768 22639 22992 22516 22123 21997 22230 21928 22340 21915 22257 22066 22231 22721 23040 22513 22872 22592 22805 22132 22638 22058 22446 22194 22574 21938 22531 22292 22436 22559 22900 22758 22787 22465 22820 22432 22925 22360 22709 22370 22834 22295 22780 22335 22633 22387 22754 22417 22697 22372 22679 22373 22746 22339 22724 22287 22743 22252 22597 22440 22739 22327 22778 22274 22599 22352 22683 22293 22050 22445 22672 22423 22625 22471 22702 22401 22674 22482 22661 22333 22621 22428 22685 22367 22677 22505 22657 22408 22605 22231 22656 22546 22659 22442 22775 22375 22793 22581 22702 22455 22724 22391 22551 22389 22620 22247 22624 22393 22497 22284 22549 22312 22422 22250 22407 22211 22516 22260 22512 22283 22546 22441 22602 22550 22776 22309 22615 22277 22610 22455 22686 22361 22389 22447 22398 22660 22560 22627 22408 22592 22489 22631 22669 
22887 22089 22852 22160 22919 22006 22720 22155 23094 22192 22709 22241 22963 22029 22629 22311 22935 22205 22638 22324 22961 22410 22741 22277 22756 22247 22951 22110 23109 22124 22844 22437 22810 22093 22638 22192 22923 22419 22668 22188 22624 22200 22800 22514 22740 21958 22872 22240 22705 22520 23082 22444 22459 22498 22528 22192 22609 22580 23248 22638 22489 22332 22311 22290 22424 22615 23277 22807 22589 22067 22273 22151 22477 22150 22570 22617 23168 22712 22881 22336 22351 22130 22729 22695 22773 22805 22557 22865 22586 22924 22367 22720 22262 22667 22177 22343 22136 22753 22416 22734 22669 22829 22606 22909 22657 22891 22691 22787 22585 23028 22484 22834 22603 22931 22387 22821 22347 22748 22290 22760 22415 22649 22231 22562 22115 22566 22080 22528 21904 22632 22053 22624 21844 22648 22016 22520 21888 22567 21903 22635 21992 22561 21953 22553 22002 22626 21804 22658 22032 22725 21928 22774 21977 22749 21943 22925 22092 22879 22152 22929 22226 22977 22444 22992 22449 23150 22450 23043 22413 23152 22315 23100 22344 22900 22156 22838 21942 22817 21998 22811 22202 22849 22213 22954 22225 22972 18330 19398 18679 19335 19052 19736 19015 23585 22679 23104 22643 23009 22439 23093 22409 22656 22428 22825 22283 22835 22225 22919 22230 22872 22384 22817 21959 22717 22253 22669 22058 22829 22122 22732 22192 22631 22173 22999 22141 22562 22445 22557 21991 22935 22029 22391 22554 22567 22019 22983 22324 22204 22488 22556 22279 22507 22096 22368 22149 22319 22481 22460 22064 22675 22050 22297 22708 22375 22333 22880 22048 22423 22690 22363 21613 22915 22168 22496 22728 22415 22215 22912 22069 21959 22295 22405 22293 22451 22656 21959 22803 22397 22375 22564 22651 22120 22907 22543 22288 22488 22599 22080 22693 22365 22474 22467 22536 22321 22787 22652 22661 22431 22629 22220 22813 21802 22756 22292 22344 22552 22852 21968 22996 22234 22472 22359 22791 21845 23088 22076 22484 22344 22858 21948 22962 22343 21988 22178 22952 22154 22531 22227 23040 22086 22748 22244 22899 21888 22855 22230 22827 21754 22930 22292 22832 21874 22904 22276 22704 21947 23109 22271 22664 22007 23004 22123 22818 22151 23032 22248 22867 22017 23041 22003 22732 21824 22939 22148 22792 22000 22837 22160 22981 22183 22738 22033 22773 22104 22895 19247 20029 19226 20174 19385 20717 19449 20549 19861 23711 22729 23289 22438 23098 22517 23215 22252 23016 22484 23129 22711 22874 22304 22832 22317 22921 22185 23097 22100 22796 22387 22848 22302 22880 22347 22725 22071 22817 22091 22682 22224 22496 22164 22800 22365 23114 22274 22905 22220 22652 22259 22529 22353 22394 22315 23144 22902 22801 22236 22506 22092 22643 22400 22452 22474 23017 22842 23035 22241 22455 22182 22497 22091 22282 22656 22964 22691 22371 22228 22401 22222 22450 22266 22960 23065 22690 22832 22441 22784 22096 22622 22275 22901 22577 22899 22216 22423 22204 22421 22603 22949 22681 22614 22279 22563 22310 22808 22443 22901 22411 22475 22210 22939 22551 22903 22295 22711 22073 22672 22520 22948 22352 22826 22037 22949 22554 23119 22341 22787 21879 22779 22418 23076 22126 22753 22007 23046 22402 23125 22178 22773 22193 23121 22359 22961 21895 22875 22311 23066 22116 22728 22160 23018 22460 23002 22034 22720 22354 23189 22178 22697 21932 23098 22105 22705 21964 23002 22177 22809 21924 22906 22195 23024 22017 22837 22375 22971 22151 22667 22026 22960 22083 22949 22407 22866 22272 22658 21940 22631 22094 22673 19576 20551 20285 20741 20247 20985 20427 20928 20435 20913 22881 23354 22530 22950 22661 23126 22261 23056 22506 22810 22294 22859 22331 22905 22153 22725 22294 22929 22356 22762 22649 22771 22307 22461 22616 22544 22101 22599 22496 22601 22176 22617 22704 22321 22211 22922 22421 22570 22177 23033 22208 22503 22359 22966 22099 22491 22737 22432 22229 22592 22769 22479 22023 23124 22167 22046 22663 22651 22926 22088 22903 22461 22588 22254 23051 22337 22487 22784 22874 22304 22584 22682 22726 22225 22768 22501 22337 22416 22715 22420 22576 22596 22855 22099 22768 22322 22752 22083 22987 22534 22784 22252 23088 22368 22616 22485 22924 22059 22978 22412 22891 21921 23187 22402 22753 22346 22991 22131 22728 22483 22824 21985 23031 22192 22689 22229 23111 22071 22849 22523 22808 22024 23065 22307 22568 22403 22933 22080 22883 22248 23050 21994 23079 22036 22935 22236 22781 22045 22952 22181 22881 22145 22887 22119 22884 22360 22669 22055 22926 21928 23111 22140 22853 22150 22949 22181 22775 22087 23075 22184 22667 22216 22791 22023 22758 22352 22793 22119 22877 22148 22681 22230 22791 22155 22755 22242 22720 22080 22891 22252 22195 22240 21337 20869 21387 21072 21397 21053 21709 21075 21248 22989 23003 22592 23150 22445 22746 22887 22696 22263 22972 22535 22457 22496 22883 22264 22509 22882 22537 22210 23123 22267 22496 22596 22477 22418 22614 22907 22582 22676 22633 22830 22064 23054 22577 22438 22552 22817 21777 22574 22682 22656 22533 22947 22365 22705 22696 22944 22082 22978 22448 22691 22214 22816 22258 22619 22637 23046 22098 22984 22440 22617 22224 23136 22194 22675 22317 22989 22045 23095 22476 22856 22048 23143 22263 22690 22289 23161 22179 22960 22421 22864 22016 23133 22563 22960 22151 23192 22354 22791 21934 23167 21937 22840 22138 23092 22069 22715 22160 23067 22438 22579 22032 22852 22135 22813 21986 22634 22080 22995 21990 22624 21900 22935 22368 22787 22133 22678 22229 22954 22144 22663 22108 22905 22256 22680 22148 22705 22279 23073 22218 22711 22053 22668 22277 22924 22202 22574 21891 22990 22590 22694 22223 22387 22594 22775 22254 22507 22365 22343 22744 22927 22064 22292 22521 22407 22640 23216 22554 22405 22221 22444 22304 22287 22442 22974 22865 22880 22951 22403 22731 22164 22638 22064 22552 22208 22458 22323 22599 22453 22671 22531 22752 21605 21985 21462 21957 21398 22149 21651 22380 21954 22456 22688 23159 22632 22972 22348 22816 22039 22796 22421 22880 22334 22982 22563 23148 22429 23245 22229 22937 21899 22812 21861 22871 22187 23028 22396 23066 22409 23082 22584 23153 22312 23212 22253 23120 22250 23017 22352 22714 22333 22993 22279 23040 22135 23040 22092 22983 22279 23096 22053 23151 22317 22940 22240 22760 22263 22728 22053 22583 22115 22747 22209 22727 22007 22680 22083 22825 22104 22657 22105 22807 22279 22969 22358 22907 22451 22709 22203 22610 22179 21929 22149 22562 22246 22804 22735 22836 22161 22482 22259 22562 22145 22425 22484 22981 22960 22584 22103 22337 22264 22254 22560 23017 22785 22529 22925 22275 22432 22160 22855 22567 22896 22554 22688 22393 22440 22369 22852 22640 22726 21552 22491 22109 23002 22688 22778 22037 22488 22193 23088 22461 22842 22309 22784 22324 23101 22375 22805 21821 22970 22478 23123 22218 22891 22055 23065 22368 23018 21987 22625 22352 23027 22279 22092 21988 22998 21974 22958 22126 22821 22167 22956 22007 22624 22230 22781 22049 22848 21989 22703 22126 23133 21998 22916 21943 22772 22081 22766 22254 22777 22528 22665 22192 22703 22273 22645 22103 22695 22330 22804 22154 22678 22141 22922 22347 22698 22153 22987 22148 22549 22472 22928 22220 22457 22243 23091 22144 22721 22464 22931 22225 22502 22609 22722 22151 22382 22879 22353 22193 22263 22401 22551 22345 22277 22929 22633 22470 22545 22855 22415 22544 22656 22795 22109 22696 22452 22729 21929 22885 22479 23193 22071 23129 22478 22587 22239 22983 22294 22757 22372 22786 21969 23057 22230 22791 22215 23040 22113 22696 22198 23109 21287 22692 22427 22903 21953 23193 22519 22700 22152 23220 21943 23045 22036 22716 22037 22994 22154 22791 22231 22775 22124 22892 21936 22759 22231 22973 22033 22784 22090 22676 21964 22912 22103 22626 22120 22760 22209 22777 22147 22631 22166 22889 22078 22644 22280 22421 22058 23035 22266 22541 22544 22785 22123 22830 22432 22443 22147 22972 22215 22376 22672 22393 22285 22640 22511 22604 22180 22991 22257 22247 22907 22376 22252 22934 22126 22925 22645 22790 22727 22221 23133 22444 22418 22565 22768 22316 22551 22606 22679 22295 22981 22388 22288 22479 22923 22086 22817 22531 22532 22295 22944 22272 22600 22425 22899 22052 22894 22465 22886 22087 23036 22151 22789 22475 22887 22044 23129 22106 22597 22252 23229 21915 22847 22303 22741 22276 23060 22087 22676 22471 22988 21764 23183 21925 22859 22226 22811 21809 22833 22212 19057 18749 19479 19036 19741 19148 19928 19118 20264 19305 23511 23028 23538 22464 23488 22642 23260 22535 23159 22461 23193 22492 23011 22449 23127 22424 22978 19652 20193 19792 20616 19838 20301 20141 20736 20123 23758 23412 23304 22704 23624 22917 22808 23123 22971 22644 23520 22462 22757 22541 23354 22393 22749 22528 21045 20937 20849 20641 20740 20773 21041 21295 21434 23302 23244 23275 22752 23069 22722 23349 23044 23156 22999 23098 22653 22729 22645 22920 22432 22698 20815 21419 21068 21626 21243 21534 21203 21550 21057 21618 22033 23184 22643 23424 22864 23416 22624 22848 22484 23056 22716 23187 22160 23310 22634 22930 22145 22519 21505 22378 21913 22136 21803 22504 21681 22615 21840 23253 22416 23137 22186 23287 22040 22992 22445 22924 22202 23025 22506 22835 22181 23083 22078 22947 22175 23113 22160 22907 22112 23040 22474 22807 22376 22785 22248 22991 22464 22855 22280 22752 22179 22850 22232 23140 22356 23029 22212 22653 22103 22753 22156 22498 22242 22808 22288 22790 22432 22781 22380 22891 22529 23115 22773 23224 22759 23155 22794 23009 22784 23040 22815 22865 22810 22954 22771 23221 22762 22615 22984 22492 22784 22533 22835 22704 22998 22586 22948 22620 22859 22425 22713 22349 22663 22357 22792 22112 22595 22020 22585 22272 22914 22657 23123 22418 23020 22437 22931 22244 22851 21973 22765 22332 23051 22538 23058 22193 23077 22096 22631 21869 22820 22322 23140 22447 23001 22133 22642 22009 22908 22305 23389 21960 22933 22103 22812 22160 23068 22279 22904 21929 22921 22108 22798 22243 22880 22112 22870 21959 22942 22295 22823 22017 22917 22169 22970 22277 22701 22086 22913 22248 22941 22185 22749 22225 22760 22337 22806 22124 22888 21959 22849 22383 22708 22228 22505 22608 22812 22286 22634 22125 22981 22289 22593 21985 22845 22715 22327 22227 22379 22757 22673 22147 22496 22409 22997 22336 22403 22247 23241 22151 22424 22075 22265 22948 22290 22509 22445 22941 22509 22332 22480 22881 22406 22404 22566 22830 22492 22460 22438 22950 22400 22620 22457 22961 22242 22634 22517 23004 22274 22732 22451 22968 22152 22776 22355 22857 21988 23010 22262 22801 21995 23192 22319 22653 22065 23138 22115 22746 22359 22960 21943 22805 22449 22858 21926 23011 22186 23008 22121 23077 21996 22890 21997 22859 21987 23001 22016 22827 21959 22902 22094 22709 22185 22896 21884 22775 22327 22813 21876 22893 21961 22802 22169 22889 22144 22674 22300 22680 22016 22835 22129 22801 22287 22817 22279 22887 22289 22736 22217 22756 22071 22724 22299 22836 21994 22875 22326 22864 22428 22621 22243 22685 22314 22490 22451 22812 22267 22363 22941 22501 22135 23216 22228 22337 22977 22505 22310 22999 22333 22563 22792 22490 22477 23109 22253 22559 22565 22755 22597 22299 22797 22167 22612 22619 22773 22326 22850 22521 22244 22597 22856 22096 22819 22532 22503 22428 22947 22006 22746 22537 23047 22473 22837 22161 22699 22548 22785 22296 23097 22020 22709 22541 22862 22144 23068 22227 22695 22391 22856 22122 23189 22119 22738 22377 23124 21949 23136 22110 22662 22543 22757 22006 23095 22216 22816 22326 19339 18843 19989 18775 20098 19279 19981 19416 20199 23144 23849 22807 23453 22850 23271 19674 20585 19962 20775 20087 20913 20032 21131 20002 23904 23104 23543 22795 23641 22796 21207 20714 21220 20741 21412 20864 21415 21003 21439 20945 23883 22957 23378 22845 23367 21220 21927 21489 21809 21184 22051 21413 21765 21767 21825 22755 23569 22791 22968 23095 23083 21752 22617 22003 22144 22425 22283 22486 22603 21710 22817 22935 23022 22392 22899 23044 22692 22409 23304 22408 22874 22936 22502 22396 22949 22798 22636 22331 23001 23054 22417 22760 22848 22918 22445 23274 22505 22581 22750 22941 22480 22758 22789 22890 22377 22981 22678 22776 22476 23005 22412 22752 22589 22808 22236 22862 22661 22841 22230 22717 22521 23060 22215 22817 22664 23162 22236 22743 22411 23126 22290 22545 22260 23139 22484 23035 22155 22528 22121 23008 22493 23239 22486 23317 22321 23171 22231 22966 22177 22861 21912 22880 21924 22797 22192 22738 22196 22791 22263 22988 22331 23276 21985 23048 22127 23042 22007 22647 22130 22797 22355 22965 22324 22954 22489 22818 22115 22925 22192 22927 21863 22843 22016 22789 22240 
