# Supplementary material for: An Active Feature Selection Strategy for DWT in Artificial Taste
Source: Hindawi journal article supplement (doi:10.1155/2018/9709505), 2018-01-01
Supplement: f1 [file 9709505.f1.zip › spirit-hi-2.txt]

23381 23613 23264 23834 22225 22150 22565 22124 22070 22072 22528 22122 22329 22122 22285 22011 22487 22240 22433 22215 22365 21805 22222 22216 22486 22241 22612 22200 22464 21400 22189 22106 22317 22363 22503 22352 22520 22081 22464 21929 22355 22193 22632 22224 22645 22266 22388 22137 22410 22121 22679 22324 22514 22119 22251 22034 22551 22286 22683 22147 22505 22176 22611 22231 22616 22024 22407 22073 22789 22184 22509 21999 22563 22214 22685 22065 22448 22005 22729 22151 22637 21996 22632 22155 22711 22093 22511 22257 22728 22081 22488 22084 22797 22184 22668 21857 22608 22229 22747 22316 22615 22152 22860 21986 22489 22128 22830 22185 22571 21984 22747 22142 22488 21874 22744 22277 22551 21769 22556 22263 22644 22122 22584 22282 22634 22040 22505 22066 22868 21975 22656 22129 22679 21850 22567 22071 22653 21964 22784 22182 22727 22081 22005 22084 22613 22106 22584 22100 22606 22120 22492 22124 22594 22009 22455 22103 22642 21954 22600 22145 22814 21978 22628 21957 22694 22073 22594 21870 22656 21952 22448 21903 22585 21922 22606 22134 22611 22053 22561 22131 22609 21994 22550 22144 21991 21440 21916 21594 22107 21576 21981 21632 22194 21648 22712 22280 22766 22231 22678 22237 22674 22119 22631 22221 22702 22158 22992 22188 22608 22072 22515 22135 22535 22162 22508 22180 22556 22147 22397 22464 22502 22119 22468 22334 22522 22073 22732 22199 22282 22040 22633 22200 22373 22232 22600 22210 22218 22278 22419 22074 22281 22518 22352 22024 22327 22553 22392 22006 22609 22435 22361 22073 22679 22060 22363 22112 22776 22139 22512 22403 22458 22221 22193 22580 22236 22711 22596 22152 22112 22045 22682 22364 22432 22224 22464 22408 22025 22528 22273 22333 22217 22493 22199 22375 22304 22573 22039 22504 22365 22420 22251 22578 22299 22184 22366 22521 22184 22349 22374 22342 22134 22408 22375 22356 21993 22656 22141 22441 22092 22675 21993 22476 22241 22573 21916 22573 22385 22347 22142 22675 22004 22359 22222 22503 21888 22477 22140 22499 22058 22658 21993 22585 22204 22400 21915 22625 21984 22327 22140 22512 21889 22684 22016 22400 22094 22720 21773 22463 22144 22518 21997 22700 21853 22577 22062 22485 21922 22736 21879 22433 22072 22515 21703 22617 22076 22359 22133 22594 21908 22518 22180 22452 21836 22749 21955 22464 21621 22104 21399 22232 21525 21948 21582 22343 21453 22711 22073 22688 22084 22497 21992 22500 21900 22576 22103 22612 21916 22400 21998 22438 21975 22343 21945 22509 21668 22582 21828 22411 21734 22532 21907 22352 21888 22483 21830 22424 21959 22455 21753 22439 21804 22408 21831 22459 21892 22349 21947 22375 21815 22421 22099 22311 21841 22456 21914 22413 21984 22409 21961 22388 22039 22359 21792 22295 22037 22275 21948 22360 21980 22394 21771 22417 21879 22352 21847 22452 21926 22493 22058 22460 21872 22341 21975 22336 21892 22281 22112 22392 21909 22346 22151 22296 22052 22264 22187 22208 21873 22441 21933 22209 21820 22368 22021 22231 21794 22452 21983 22138 21992 22451 21947 22190 22323 22301 21896 22052 22318 22193 21825 21957 22305 22241 22043 22334 22032 22620 22048 21984 22093 22250 22446 22161 21997 21962 21745 22464 22144 22202 22024 21902 22392 22331 21927 22137 21937 21921 22292 22178 22296 21962 22184 21906 22583 22060 22311 22480 22157 21991 22316 22075 22274 22220 22272 22008 22183 21854 22172 22023 22420 22219 22392 22186 22376 22107 22243 22000 22168 21963 22289 21941 22600 22050 22508 22110 22286 21947 22320 21456 21881 21672 22107 21809 22300 21796 22150 21692 22104 21890 22490 22043 22640 22086 22713 22024 22345 21934 22368 21882 22476 22134 22635 22073 22545 21911 22400 21840 22417 21767 22408 21927 22503 22106 22544 21943 22636 21967 22555 21799 22652 21664 22388 21913 22449 22027 22555 22071 22549 21822 22414 21704 22364 21819 22438 22126 22610 21994 22510 21829 22442 21700 22449 21831 22553 21852 22454 21840 22415 21873 22449 21843 22652 21736 22509 21852 22363 21760 22489 21997 22320 21973 22239 21498 22360 21947 22516 21889 22378 21760 22452 21783 22427 21888 22296 21736 22474 21869 22389 21952 22340 21768 22304 21892 22359 21857 22408 21780 22385 21963 22432 21916 22220 22023 22345 21874 22302 21831 22320 21893 22314 21956 22249 21774 22324 21984 22390 21833 22119 21976 22414 21949 22293 21795 22372 21911 22267 21888 22393 21995 22294 21928 22171 21985 22432 21930 22243 22012 22423 22236 22275 21878 21993 22157 22289 21845 22340 22071 22409 21906 22151 21907 22416 22121 22257 21883 22230 22352 22182 21959 22063 22329 22133 21892 22180 22144 22314 21979 22135 22018 22576 21879 22137 21875 22549 22279 22287 21344 22231 22204 22132 21653 21929 22151 21875 21723 21814 22151 21992 21899 22020 22056 22169 22327 21989 22375 22088 22416 22343 22360 22257 22315 22010 22269 22053 22489 22135 21987 22086 22464 22121 22060 22164 22421 22088 22060 22076 22445 22020 22391 22024 22515 22109 22188 22024 22408 21898 22187 22097 22473 21917 22309 22144 22339 21985 22451 22024 22256 21807 22449 22092 22340 21850 22584 21959 22340 21941 22668 21867 22246 22060 22474 21852 22412 22018 22359 21755 22437 22059 22309 21776 22541 21997 22336 21828 22582 21803 22297 22008 22536 21674 22505 21974 22522 21716 22521 21963 22411 21808 22639 21993 22253 22011 22636 21849 22254 21853 22533 21975 22368 21968 22474 21731 22499 21943 22390 21912 22497 21649 22391 21856 22427 21785 22426 21919 22444 21806 22464 21863 22369 21861 22358 21802 22324 21977 22360 21901 22410 21909 22299 21723 22537 21745 22321 21853 22503 21684 22306 21842 22387 21799 22478 21818 22361 21645 22516 21745 22363 21859 22501 21788 22301 21930 22280 21825 22388 22028 22319 21852 22400 21873 22311 21944 22280 21910 22158 21920 22215 21984 22369 21872 22272 21817 22445 21888 22216 22036 22233 21912 22321 21957 22293 21730 22302 21833 22144 21706 22329 21767 22081 21984 22058 21958 22409 21935 22139 21737 22368 22054 22272 22121 22208 21918 22128 22112 22311 21751 22376 22072 22345 22183 22168 21863 22231 22274 22162 22024 22428 21861 22180 22262 22183 21923 22208 22200 22094 21852 22364 21913 22432 22205 22181 21824 22077 22375 22168 21806 22521 21974 21968 22086 22422 21908 22090 22240 21987 22000 21884 22156 22008 22017 22121 22328 21986 22325 22101 22368 21752 22504 22208 22189 21980 22441 22005 22177 22087 22318 22006 22121 22227 22261 21825 22349 22128 22437 21921 22408 21956 22200 22192 22414 21736 22428 22023 22311 22040 22509 21856 22381 22131 22231 22093 22429 21988 22231 21954 22592 21986 22324 21760 22357 22016 22480 21926 22336 21812 22343 21923 22594 22022 22638 22070 22469 21839 22324 21831 22260 21702 22233 21669 22254 21712 22309 21816 22485 21869 22596 21928 22586 21787 22222 21785 22585 21974 22428 21684 22281 21953 22502 21861 22264 21858 22505 22005 22462 21756 22563 21911 22536 21988 22480 21771 22369 21780 22448 21921 22657 21869 22276 21593 22413 21724 22496 21823 22413 21904 22291 21853 22384 21928 22242 21748 22368 21860 22407 21881 22368 21813 22409 21860 22511 21685 22338 21715 22375 21791 22564 21859 22419 21671 22349 21784 22293 21820 22452 21860 22464 21700 22315 21681 22310 21816 22372 21956 22351 21968 22298 21690 22147 21894 22336 21745 22272 21918 22297 21851 22305 21931 22322 21888 22312 21904 22222 21961 22409 21913 22224 21810 22220 21930 22316 21786 22237 21859 22188 21797 22349 21984 22251 21849 22195 21880 22070 21920 22400 21892 22113 21870 22120 22105 22317 21944 22103 21816 22297 21888 22212 21971 22263 22114 22309 21972 22184 22315 22243 21902 22325 22208 22088 21910 22388 22165 22080 21920 22519 21879 22042 21879 22328 21895 22221 22282 22132 21807 21965 22256 22124 22019 22437 22020 22272 22257 22090 22245 22368 22054 22425 22144 22151 21992 22400 21929 22534 22148 22164 22201 21994 22313 21985 22316 22152 22016 22160 22371 21687 22393 21924 22164 22239 22228 21872 22306 21906 22258 22103 22011 22162 22195 21860 22332 22039 22149 22140 22039 22259 22195 21961 22423 21770 22501 21873 22316 22092 22146 22121 22353 21914 22528 21891 22363 22051 22237 22126 22196 22137 22330 21944 22380 21792 22529 21800 22418 21948 22190 22029 22272 21992 22410 21858 22534 21700 22497 21901 22400 21965 22304 21968 22225 21943 22301 21976 22359 21861 22576 21696 22539 21776 22508 21709 22480 21780 22310 21399 21721 21406 21932 21467 21888 21443 21943 21498 22632 22080 22637 21917 22682 21830 22774 21938 22528 21959 22454 22052 22407 21979 22335 21927 22309 22000 21961 21431 22126 21559 21953 21398 22071 21615 21977 22216 22487 22032 22444 21989 22428 21898 22439 21976 22328 21981 22429 21729 22403 21138 22638 21773 22154 21378 22194 21369 22149 21473 22208 21489 22148 21464 22605 22007 22641 21916 22645 21902 22517 21860 22394 21772 22464 21792 22440 21792 22397 21833 22394 21604 22288 21621 22176 21712 22134 21681 22225 22099 22219 22041 22368 21368 22405 21988 22232 21917 22311 21851 22272 21794 22293 21852 22358 21792 22387 21761 22099 21716 22082 21836 22152 21829 22144 21864 22137 22058 22342 22108 22208 22045 22192 22176 22174 22146 22169 22272 22133 22281 22200 22300 22343 22121 22332 22037 22056 22016 21989 21907 22024 21986 22194 21929 22240 21991 22455 21908 22378 21914 22364 21890 22464 21842 22563 21960 22397 21969 22056 21916 22082 21763 22075 21884 22108 22208 22109 22272 22117 22295 22104 22248 21990 22381 21685 22325 21718 22452 21797 22455 21849 22288 21882 22266 21936 22125 22025 22087 22150 22122 22240 22133 22068 22089 22158 22237 22008 22208 21897 22310 21964 22311 21755 22390 21792 22346 21836 22407 21847 22422 21944 22378 21967 22312 21989 22356 22053 22193 22185 22023 22125 22178 21981 22105 22151 22217 21991 22296 21888 22325 21883 22311 21904 22319 21866 22333 21901 22244 22060 22077 22017 22295 21881 22300 21774 22474 21551 22508 21984 22159 21991 22411 21703 22603 21760 22319 21952 22379 21817 22573 21744 22375 21967 22408 21729 22572 21693 22345 21966 22238 21880 22447 21880 22277 22011 22344 21659 22541 21863 22184 22022 22400 21692 22513 21894 22260 21934 22445 21693 22538 21745 22157 21871 22412 21797 22236 21824 22410 21728 22375 21820 22289 21689 22333 21824 22343 21787 22236 21994 22327 21657 22504 21824 22408 21878 22275 21738 22471 21649 22320 21623 22344 21848 22344 21649 22345 21907 22437 21659 22179 21763 22344 21650 22375 21856 22281 21810 22295 21908 22181 21852 22307 21753 22280 21766 22200 21806 22343 21899 22254 21832 22190 22053 22239 21896 22408 21907 22160 21769 22158 21286 22279 21905 22395 21954 22337 21814 22301 21724 22248 21305 22142 21671 22200 21937 22181 22007 22366 22051 22329 21868 22231 21879 22083 21852 22188 21721 22104 21761 22093 22045 22311 22222 22231 21958 22121 21891 22159 21824 22114 22288 22502 22040 22153 21831 22164 21804 22276 22267 22343 21909 22080 21583 21921 22201 22328 21949 21915 21841 21910 22332 22147 21898 21953 21783 22312 22200 22025 21743 21951 22196 22277 21857 22016 21997 21765 22141 22062 22072 21848 22312 21997 22148 21834 22434 21945 22316 21760 22299 21987 22144 21932 22392 22032 22043 22024 22308 21808 22141 22148 22219 21943 22365 21890 22092 22129 22336 21811 22439 21962 22229 22103 22361 21834 22407 21835 22366 21992 22120 22192 22119 21929 22548 21799 22365 21920 22284 22006 22215 22067 22279 21973 22336 21749 22582 21661 22434 22183 22412 21836 22390 21870 22289 22036 22199 21946 21552 21440 22153 21421 21858 21345 22100 21467 22101 21360 22721 21813 22653 21730 22613 21768 22272 21815 22250 21472 22240 21449 22136 21530 22264 22379 22597 22280 22730 21724 22653 21508 22261 21318 22216 21351 22253 21482 22330 21629 22220 22038 22561 21996 22348 21872 22225 21642 22370 21671 22240 21540 22360 21492 22279 21560 22432 21832 22464 22040 22359 22037 22154 21788 22481 21702 22423 21704 22336 21665 22312 21836 22302 21922 22549 21740 22420 21793 22459 21746 22374 21728 22303 21896 22040 21782 22410 21692 22423 21647 22285 21999 22326 21862 22358 21684 22320 21729 22231 21947 22097 21876 22391 21879 22335 22009 22263 22016 22197 21819 22332 21682 22203 21911 22241 21781 22289 21902 22234 21919 22227 21952 22247 21835 22199 21937 21534 22011 22357 22016 22231 22041 22033 21842 22416 21895 22240 22097 22109 21914 22325 21856 22103 22128 22354 21885 22312 21813 22183 22349 22033 21962 22355 21794 22070 22263 21974 21866 22251 22029 21976 21956 22277 22040 22032 22471 22063 21844 22373 21890 22107 22244 22082 21804 22042 22200 22120 21834 22416 21845 22003 22342 22024 21861 22077 
22097 21441 22246 21624 22182 21577 22139 21322 22244 21432 22237 21268 22336 21377 22291 21357 22221 21472 22162 21568 22201 21687 22179 21464 22196 21314 22261 21486 22274 21633 22126 21479 22139 21591 22243 21696 22070 21617 22135 21441 22125 21733 22146 21716 22207 21545 22004 21548 22110 21617 22217 21678 22145 21426 22185 21577 22247 21698 22091 21542 22020 21510 22137 21737 22205 21533 22119 21735 22312 21628 22174 21568 22129 21604 22284 21765 22204 21417 22214 21803 21933 21945 22240 21897 22085 21536 21744 21755 22311 21654 21972 21451 22135 21813 21982 21724 22024 22065 21928 21701 21913 21863 22289 21783 22066 21665 22616 21622 21753 21639 22305 22068 21792 21504 22153 22116 21789 21641 21842 22280 21872 21433 21879 22151 21866 21531 21927 21981 22089 21608 21902 21760 22264 21677 22025 21772 22450 21565 21830 21640 22428 21685 21767 21515 21864 22109 21880 22003 21785 22220 21863 22000 21678 22343 21922 22058 21590 22182 21936 21931 21649 22127 22087 21949 21776 21974 22004 22107 21753 22129 21943 22123 21671 22216 21894 21724 21677 22325 21895 21791 21696 22413 21722 21874 20046 20707 20101 20368 20090 20775 20397 20300 20400 20960 21993 22240 21961 22464 22028 22136 21827 22597 21789 22263 21724 22477 21663 22023 21808 22492 21639 22096 21852 22368 21659 22156 21859 22313 21389 22240 21751 22282 21419 22230 21881 22185 21528 22440 21746 22327 21520 22577 21617 22202 21505 22493 21599 22059 21859 22443 21700 22128 21823 22173 21625 22205 21846 22274 21455 22348 21837 22668 21381 22429 21763 22352 21553 22572 21411 22197 21513 22272 21462 22328 21457 22107 21408 22416 21467 22211 21552 22254 21469 22172 21643 22257 21518 22208 21488 22279 21536 22302 21278 22252 21600 22241 20963 22316 21572 22239 21420 22377 21488 21751 21558 22137 21549 22179 21652 22108 21568 22299 21559 22104 21605 22172 21621 22074 21623 22310 21464 22137 21721 22095 21499 22256 21682 22025 21610 22183 21607 22126 21623 22055 21672 22113 21622 22121 21657 22255 21520 22155 21751 22112 21548 22349 21613 22154 21673 22208 21705 22309 21734 22152 21702 22084 21641 22016 21755 21997 21647 22379 21617 21836 22029 21951 21640 22411 21697 21814 22097 21915 21518 22396 21696 21792 21884 22075 21578 22107 22192 21808 21474 22519 21595 20437 20903 20613 20405 21224 20394 21115 20939 20959 20538 22567 22119 22105 21776 22779 21817 22279 22096 22229 21579 22110 22022 22123 21558 22189 22119 22039 22007 22149 22009 21856 22350 22016 21782 21813 22252 21842 21863 22004 22289 21712 22158 22192 21850 21896 22169 22066 21750 21865 22240 21936 21879 22127 22292 21645 22189 22007 22064 21641 22407 21914 21833 21787 22381 21684 21997 21970 22361 21609 22105 21979 22135 21484 22358 21867 22144 21589 22503 21831 22219 21568 22394 21735 22080 21787 22324 21664 22032 21936 22263 21768 22163 21884 22188 21601 22317 21888 22089 21399 22262 21795 22229 21527 22412 21760 22375 21555 22612 21788 22176 21479 22567 21580 22104 21752 22481 21602 22122 21824 22406 21627 22205 21932 22359 21574 22153 21925 22455 21555 22186 21568 22467 21733 22359 21403 22291 21655 22252 21447 22221 21592 22250 21575 22283 21653 22086 21661 22293 21513 22289 21552 22281 21721 22194 21544 22169 21494 22428 21633 22283 21440 21802 21277 22263 21607 22424 21504 22247 21459 22225 21541 22091 21612 22256 21617 22374 21461 22168 21445 22205 21516 21863 21596 22103 21536 22201 21794 22307 21674 22184 21593 22086 20588 21195 20608 21269 20870 21360 20853 21349 20760 21230 21857 22259 21889 22361 21817 22334 21662 22192 21588 21589 21627 22145 21627 22245 21783 22225 21784 21975 21589 22140 21752 21920 21568 22080 21960 22293 22091 22313 21762 21855 21671 21989 21666 21812 21445 22004 21870 22455 22037 21902 21499 21927 21797 22209 21604 21953 22038 22603 22035 21992 21575 21831 21775 21753 21621 22301 22304 22327 21669 21771 21617 21824 21495 22216 22210 22149 21685 21865 21895 21760 21527 21925 22052 21956 22253 21646 21917 21649 22146 21991 22184 21654 21715 21789 22117 21963 22109 21930 21912 21760 22086 22055 22123 21792 21829 21640 22174 22104 22087 21701 21973 21794 22221 21859 22157 21395 22102 22020 22266 21784 21925 21720 22309 22055 22065 21555 22252 21920 22326 21708 21930 21701 22348 21819 22109 21604 22201 21869 22193 21536 22009 22034 22309 21636 21965 21700 22471 21843 22067 21420 22151 21757 22389 21912 22076 21888 22385 21505 22000 21584 22547 21689 22267 21328 22453 21782 22213 21447 22236 21937 22198 21399 22176 21849 22378 21641 22157 21792 22422 21573 22072 21568 22400 21707 22210 21495 22416 21635 22161 21627 22470 20809 21600 20785 21697 20985 21658 21392 21764 21142 21751 21755 22347 21777 22247 21692 22173 21717 22276 21433 22266 21574 22223 21529 22251 21519 22325 21455 22274 21533 22341 21569 22134 21436 22375 21412 22187 21463 22363 21543 22163 21557 22337 21560 22232 21657 22151 21549 22245 21815 22248 21559 22147 21692 22090 21558 22104 21763 22070 21633 22242 21623 21894 21453 22217 21463 22171 21551 22223 21504 22131 21636 22112 21468 21920 21648 22183 21558 22135 21845 21876 21536 22279 21581 21965 21592 22240 21447 21844 21977 22061 21530 21824 22081 22089 21573 22059 21969 21895 21434 22394 21655 21943 21899 22262 21483 22010 21970 22161 21381 21756 22121 21895 21541 22085 21991 21913 21430 22472 21545 21633 21719 22379 21553 21779 22071 21793 21568 22167 21953 21700 21471 22651 21998 21769 21703 21925 22119 21557 22164 21889 21899 21604 22318 21751 21867 21846 22127 21764 22008 22073 22105 21535 22023 21973 21960 21687 22313 21801 21803 21943 22208 21653 22107 21913 22169 21419 22232 21816 22021 21724 22313 21684 22001 21955 22224 21625 22060 22067 22080 21489 22375 21684 22075 21722 22279 21609 22150 21722 22263 21415 22074 21944 21781 21110 22112 21403 21792 21409 22083 21405 21876 21920 22341 21453 22463 21852 22189 21603 22521 21556 22162 21814 22378 21404 22456 21700 22277 21450 22406 21576 22113 21703 22311 21416 22083 21851 22146 21539 22501 21660 21972 21766 22333 21575 22229 21797 22224 21443 22551 21655 22038 21789 22330 21534 22486 21432 22272 21525 22265 21552 22085 21701 22215 21519 22231 21549 22189 21413 22253 21549 22196 21673 22181 21683 21947 21655 22167 21527 22338 21455 22182 21367 22324 21324 22296 21543 22456 21325 22217 21511 22141 21297 22369 21461 22176 21527 22410 21556 22022 21794 21992 21755 22166 21604 22160 21583 22149 21511 22215 21587 22000 21504 22180 21634 22064 21512 22391 21488 22024 21494 22130 21675 22195 21504 22103 21627 22060 21557 22183 21733 22171 21617 21962 21562 21985 21613 21902 21748 21863 21648 22026 21543 21831 21684 22071 21672 22217 21986 22087 21384 21927 21632 22272 21929 21888 21713 21893 21900 22292 21527 21808 21553 22473 21961 21909 21562 21713 21753 22452 22060 21832 22194 21837 21461 22081 22133 22167 21591 21197 21489 21972 21952 22304 21560 22030 21665 21896 22259 22036 21747 21725 21831 22005 21648 21489 22151 21961 22193 21875 21846 21674 22032 21862 22204 22069 22116 21638 21840 21633 21922 21819 22077 22051 22096 21825 21776 21702 21996 21922 22146 22121 22097 21840 21911 21518 21922 21630 21968 21803 22287 21871 22453 21972 22358 22000 22225 21796 22084 21909 21971 21910 22113 21772 22176 21703 22200 21842 22368 21767 22345 21824 22313 21780 22123 21651 21868 21524 22121 21707 22402 21737 22253 21538 21973 21742 22400 21804 22134 21586 22081 21691 22438 21629 22152 21500 22512 21742 22124 21286 22208 21706 22319 21367 22296 21709 22283 21464 22281 21823 22154 21380 22325 21806 22136 21479 22459 21735 22071 21714 22359 21589 22060 21777 22220 21460 22232 21808 22160 21504 22496 21406 22338 21415 22191 21450 22224 21516 22222 21514 22177 21472 22389 21531 22120 21536 22132 21722 22021 21627 22175 21404 22186 21565 22196 21475 22304 21399 22215 21569 22135 21554 22331 21325 22435 21389 21953 21543 22189 21303 22264 21526 22260 21396 22251 21708 22103 21580 22048 21751 22300 21635 22052 21557 22080 21706 22091 21577 22137 21583 22216 21481 22119 21597 22136 21746 22145 21575 22210 21461 22135 21498 22039 21530 22128 21671 22117 21701 21959 21517 22039 21513 22267 21540 22097 21627 22080 21692 22295 21938 21947 21702 21973 21598 21920 21421 22121 21145 22391 21492 21968 21632 21762 20134 20342 20537 20473 20482 20651 20357 20474 20455 22238 21899 22332 22005 22792 21897 22536 21696 22304 21692 22045 21707 21828 21895 21779 21939 21985 20884 20656 20797 20647 20917 20676 20887 20730 20780 20885 21952 22187 21764 22267 21697 22336 21863 22202 21493 22137 22151 22062 22038 21922 22033 21859 22186 20708 21189 20656 21147 21040 21298 20983 21384 21104 21365 22144 22354 22087 22272 21908 22256 21925 22105 21826 22072 21829 22089 21751 22153 21925 22217 21717 21367 21070 21633 21303 21600 21235 21430 21264 21612 21462 22343 22087 22157 21993 22279 21907 22077 21905 22048 22003 21937 21955 22093 21878 22000 21958 21981 21464 21639 21456 21670 21497 21703 21476 21814 21649 22125 21853 22163 21865 22200 21739 22146 21717 22172 21645 22261 21591 22297 21441 22368 21533 22481 21547 22481 21543 22391 21424 22400 21261 22394 21428 22415 21558 22394 21437 22281 21476 22440 21435 22298 21545 22380 21482 22242 21721 22098 21676 22359 21605 22151 21401 22200 21491 22104 21552 22226 21328 22298 21525 22353 21498 22200 21497 22352 21545 22072 21439 22112 21451 22106 21408 22200 21575 22252 21620 22133 21453 21952 21473 22148 21344 22227 21497 22087 21357 22275 21426 22185 21348 22321 21590 22256 21991 22202 21371 22261 21612 22147 21475 22036 21558 22051 21620 22121 21706 22089 21858 22216 21552 22017 21590 22200 21624 22076 21524 22123 21435 22272 21545 22205 21451 22161 21571 22055 21504 21957 21701 22169 21750 22051 21600 22044 21341 22378 21675 22181 21586 21936 21895 21894 21475 22254 21591 21729 21939 21939 21415 22118 21502 21762 21992 21968 21620 22283 21601 21846 22104 21846 21496 22359 21606 21835 22109 22039 21817 22266 21555 21895 22016 21848 22053 22358 21639 22210 22039 21837 22045 22173 21696 21860 21415 22453 21509 21784 21902 22025 21496 21719 22036 21948 21568 21590 22024 22048 22299 21639 21968 21943 22339 21772 21826 21589 22226 21705 21978 21736 22169 21858 21943 21556 22107 22131 22090 21782 21765 21681 22096 22082 22122 21844 21672 21556 21982 22039 22233 21969 22025 21557 21885 21744 22196 21860 22228 21689 21973 21581 22083 21746 22369 21991 21879 21735 21980 21544 22103 21952 22242 21797 22150 21634 21819 21478 22113 21744 22382 21838 22265 21739 22198 21500 21829 21539 21917 21536 22137 21456 22199 21788 22286 21803 22469 21788 22237 21709 22163 21478 22412 21563 22050 21361 22163 21587 22522 21813 22368 21600 22220 21281 22055 21680 22222 21746 22423 21715 22149 21431 22032 21696 22353 21728 22245 21607 22055 21591 22515 21776 22301 21380 22136 21567 22151 21414 22151 21484 22273 21607 22205 21396 22189 21634 22154 21463 22193 21504 22145 21717 21965 21604 22246 21627 21960 21150 22263 21456 22123 21670 22158 21421 22185 21446 22247 21295 22121 21570 22240 21405 22145 21518 22104 21504 22278 21452 22098 21548 22071 21425 22277 21492 22087 21749 22064 21427 22288 21430 22096 21474 22509 21728 22154 21505 22080 21417 22123 21473 22081 21676 22234 21704 22087 21633 22038 21446 22134 21576 22208 21397 22155 21504 22009 21716 22001 21747 21836 21820 20516 20343 20342 20141 20655 20155 20532 20071 20554 20221 22454 22209 22457 21867 22421 21895 21125 20625 21120 20608 21265 20502 21345 20541 21527 21847 22928 21771 22721 21811 22598 20103 21595 21139 21511 20725 21323 20694 21129 21072 22077 22472 22007 22248 22075 22178 21341 21189 21188 21212 21591 21052 21879 21127 22004 21375 22360 21723 22208 22080 21933 22064 21544 22019 21396 22059 21527 21866 21744 21617 21821 22048 21963 22211 21992 22217 21677 22213 21898 21985 22106 21736 21921 22021 21835 22232 21572 22056 21877 21683 21923 22075 21725 22221 21491 22192 21964 21770 21798 22077 21675 22403 21607 21932 21897 21853 21862 22151 21533 22330 21780 22065 21837 22107 21431 22245 21488 21411 21929 22117 21600 22351 21604 22003 21728 22004 21602 22384 21623 22087 21788 22071 21623 22329 21607 22127 21785 22033 21504 22379 21497 22141 21752 22149 21495 22511 21585 22108 21655 22272 21530 22364 21807 21966 21702 22336 21507 22147 21646 22021 21643 22250 21477 22179 21736 22256 21510 22364 21595 22107 21644 22452 21344 22221 21623 22249 21430 22177 21463 22033 21543 22264 21527 22058 21572 
21529 21931 21703 21671 21600 21821 21559 21959 21562 21873 21609 21875 21611 21824 21770 21683 21824 21687 21748 21684 21672 21754 21895 21825 21592 21808 21687 21876 21687 21715 21796 21802 21783 21721 21788 21817 21608 21845 21767 21895 21575 21901 21709 21778 21751 21908 21753 21745 21769 21823 21576 21879 21585 21961 21433 21955 21489 21909 21576 21821 21639 21717 21694 21753 21762 21942 21628 21947 21257 21968 21494 21972 21527 21805 21617 21862 21463 21806 21550 21862 21636 21713 21389 21800 21540 21864 21483 21710 21524 21883 21485 21897 21426 21925 21584 21777 21292 21813 21577 21907 21449 21753 21504 21991 21453 21787 21483 21875 21638 21776 21528 21853 21704 21723 21396 21936 21559 21720 21403 21813 21617 21909 21517 21914 21440 21984 21436 21892 21489 22035 21349 21824 21458 21817 21363 21761 21525 21833 21308 21933 21517 21873 21437 21888 21597 21880 21495 21816 21512 21876 21459 21835 21347 21939 21431 21836 21365 21930 21431 21792 21388 21945 21432 21832 21329 21963 21529 21811 21376 21906 21457 21779 21533 21847 21447 21813 21552 21796 21481 21817 21575 21817 21456 21809 20381 20833 20450 20816 20584 20934 20583 20907 20593 22089 21806 22569 21727 22022 21655 21943 21702 21984 21561 21892 21619 21940 21522 21928 21658 21925 21496 21856 21577 21767 21504 21721 21614 21885 21514 21873 21661 21906 21656 21824 21588 21771 21425 21989 21558 21696 21476 21893 21517 21821 21636 21815 21548 21639 21728 21755 21421 21639 21778 21816 21524 21936 21803 21748 21569 21906 21532 21671 21536 21952 21541 21736 21679 21879 21526 21573 21800 21821 21509 21762 21733 21729 21613 21988 21591 21720 21649 21904 21720 21417 21655 21725 21650 21650 21896 21668 21606 21680 21949 21521 21753 21719 21767 21556 21792 21888 21704 21730 21858 21693 21616 21804 21837 21682 21808 21763 21751 21498 21769 21821 21760 21628 21860 21640 21690 21728 21898 21707 21810 21785 21769 21659 21826 21666 21676 21629 21871 21597 21831 21753 21869 21602 21971 21550 21741 21658 21944 21543 21882 21767 21147 21696 21939 21544 21797 21704 21840 21592 21945 21587 21837 21658 21884 21484 21985 21569 21732 21639 21968 21517 21908 21680 21703 21568 22080 21666 21959 21636 21897 21640 21980 21515 21824 21596 21939 21467 21963 21685 21661 21621 22008 20663 21085 20902 21141 20886 21312 20744 21318 20863 21236 21728 22268 21722 21987 21677 22054 21613 21955 21672 22008 21519 22004 21492 21849 21660 21943 21560 21901 21515 21893 21442 21941 21516 21930 21580 21994 21431 21825 21480 21945 21625 22007 21508 21895 21369 21948 21621 21913 21622 21897 21457 21863 21654 21896 21554 21984 21506 21798 21431 21841 21607 22107 21559 21826 21468 21838 21591 21841 21549 21940 21556 21895 21507 21933 21556 21851 21511 21890 21579 21788 21568 21879 21577 21824 21667 21844 21440 21801 21587 21885 21504 21864 21621 21810 21499 21953 21671 21928 21466 21937 21568 21760 21504 21956 21578 21837 21441 21909 21656 21776 21523 21952 21581 21249 21814 21888 21457 21641 21782 21797 21507 21584 21772 21840 21442 21658 21761 21813 21649 21814 21595 22005 21638 21784 21601 21793 21842 21976 21592 21659 21525 22000 21737 21787 21483 21684 21760 21904 21735 21760 22160 21671 21808 21830 21897 21741 21719 21648 21856 21864 21928 21575 21696 21568 21812 21763 21761 21867 21820 21852 21735 21659 21581 21555 21708 21756 21830 21842 21872 21763 21879 21645 21788 21361 21728 21588 21825 21701 21905 21767 22001 21767 21104 21083 21248 20954 21400 21239 21455 21244 21434 22005 22103 21761 22016 21704 22009 21824 22010 21811 21990 21712 21814 21494 21745 21602 21920 21681 21975 21778 21967 21739 21902 21568 21713 21461 21904 21576 21953 21629 21990 21664 22012 21639 21969 21512 22053 21474 21872 21566 21928 21688 21944 21668 21835 21523 21825 21616 21816 21696 21927 21712 22067 21645 21892 21504 21925 21505 22023 21494 21959 21562 21915 21494 22080 21557 21932 21559 21878 21603 21793 21783 21846 21571 21955 21575 21894 21495 22258 21364 22023 21496 21894 21456 21933 21440 22009 21624 21881 21509 21922 21360 22000 21522 21866 21449 21888 21429 21899 21522 21934 21517 21824 21627 21930 21525 21873 21651 21975 21571 21805 21549 21861 21557 21912 21568 21879 21621 21864 21606 21869 21580 21778 21556 21931 21620 21805 21436 21929 21511 21942 21536 21773 21615 21984 21482 21609 21525 21889 21545 21820 21675 21852 21760 21904 21491 21696 21701 21881 21559 21959 21681 21938 21649 21770 21536 21943 21712 21785 21578 21789 21750 21801 21420 21633 21839 21881 21465 21735 21783 21957 21570 21753 21588 22001 21541 21650 21408 21962 21632 21802 21441 21927 21335 21300 21125 21270 21475 21561 21223 21299 21480 21518 21895 21858 21832 21800 21840 21792 21831 21866 21943 21380 21870 21786 21916 22166 21728 21828 21873 21658 21632 21791 21860 21737 21633 21757 21775 21723 21558 21792 21856 21704 21667 21728 21861 21652 21710 21737 21917 21632 21766 21704 21875 21504 21825 21756 21742 21595 21834 21749 21810 21572 21938 21765 21949 21741 21897 21609 21819 21723 21927 21552 21819 21685 21929 21451 21840 21712 21811 21521 21934 21745 21800 21556 21975 21550 21710 21653 22006 21520 21941 21656 21962 21360 21943 21717 21913 21516 21948 21686 21955 21626 22049 21511 21824 21678 22016 21608 21783 21712 21996 21611 21958 21625 21946 21436 21970 21635 21810 21572 22075 21429 21890 21569 21948 21533 21954 21522 21856 21552 21902 21486 21935 21636 21905 21447 21901 21664 21833 21507 21933 21423 21829 21548 21927 21498 21984 21513 21968 21475 21891 21530 21954 21624 22000 21473 21789 21451 21957 21563 21744 21623 21856 21489 21875 21584 21863 21504 21959 21537 21755 21529 21885 21580 21796 21582 21895 21519 21983 21529 21830 21569 21959 21547 21918 21556 21933 21417 21865 21552 21892 21476 21906 21539 21555 21232 21719 21409 21712 21434 21696 21351 21792 21697 21889 21608 21999 21656 21943 21573 22031 21609 21749 21712 21845 21595 21964 21721 21737 21435 21917 21599 21666 21781 21812 21995 22003 21561 21650 21510 21929 21557 21777 21816 21700 21597 22005 21568 21623 21580 21992 21536 21829 21818 21717 21475 21872 21705 21728 21575 21909 21594 21825 21765 21851 21473 21793 21760 21894 21879 21753 21723 21705 21665 21829 21941 21523 21849 21821 21665 21638 21880 21717 21775 21742 21749 21700 21621 21744 21880 21575 21817 21849 21680 21723 21787 21777 21696 21754 21856 21861 21794 21764 21776 21654 21834 21655 21684 21818 21787 21543 21849 21779 21914 21702 21888 21706 21869 21709 21778 21788 21779 21495 21848 21620 21916 21686 21848 21523 21699 21509 21944 21659 21956 21721 21943 21712 21906 21621 21834 21533 21856 21588 21891 21713 22005 21672 21945 21585 21848 21423 21845 21686 22004 21575 21754 21539 22019 21601 21968 21380 21839 21627 21997 21637 21687 21518 21936 21703 21944 21644 21739 21000 21918 21664 21989 21575 22065 21449 21990 21495 21917 21536 22050 21559 22053 21511 21917 21557 22001 21321 21844 21559 21941 21702 21701 21530 21905 21545 21851 21559 22002 21433 21940 21409 21968 21564 21947 21435 21763 21443 21944 21436 21913 21524 22004 21459 21997 21419 21954 21494 21831 21600 22000 21472 21847 21435 21843 21504 21846 21602 21859 21571 21856 21551 22011 21645 21968 21562 21943 21584 21816 21573 21863 21531 21856 21588 21931 21680 21929 21547 21875 21592 21925 21562 21859 21477 21768 21850 21869 21590 21868 21557 21908 21573 21848 21463 21997 21608 21877 21485 21719 21700 21972 21644 21743 21396 21987 21579 21767 21744 21974 21637 21911 21814 21911 21760 21904 21669 21895 21728 21762 21474 21924 21610 21597 21440 21939 21569 21805 21726 21904 21546 21687 21785 21831 21592 21941 21575 21655 21488 21912 21569 21674 21826 21824 21422 21933 21515 21648 21766 21735 21440 22009 21568 21648 21688 21760 21603 21837 21739 21610 21801 21706 21805 21722 21781 21680 21939 21931 21767 21891 21600 21739 21747 21660 21814 21687 21755 21835 21465 21792 21833 21591 21823 21676 21769 21757 21624 21767 21773 21730 21867 21441 21898 21668 21834 21752 21789 21737 21802 21677 21925 21669 21837 21697 21855 21728 21767 21665 21819 21724 21877 21549 21949 21915 21972 21594 21893 21722 21748 21717 21854 21634 21966 21601 21964 21643 21944 21595 21944 21680 21902 21697 21741 21620 22046 21628 21776 21649 22007 21475 22025 21583 20949 20541 21053 20635 21097 20835 21079 20824 21008 21977 22053 22007 22055 21793 21997 21720 22042 21674 22089 21480 22036 21649 22050 21725 22032 21531 21155 20650 21216 20720 21335 20928 21301 20973 21363 20928 22099 21801 22237 21741 21784 21689 22039 21662 21940 21726 21859 21617 21889 21641 21832 21607 21937 20864 21333 21070 21460 21042 21461 21052 21553 21131 21479 21835 22163 21765 22088 21774 22029 21712 22000 21696 21968 21674 21902 21665 21903 21605 21797 21584 21329 21213 21530 21288 21525 21303 21513 21230 21495 21817 21996 21702 21852 21616 21872 21579 21804 21598 21849 21595 21932 21626 22320 21577 22085 21526 21913 21437 21623 21447 21593 21431 21659 21441 21558 21429 21751 21640 21712 21699 21835 21626 21752 21688 21879 21649 21957 21599 21936 21591 21967 21529 21929 21485 22001 21488 22048 21600 22002 22035 21877 21685 21807 21479 21792 21507 21729 21486 21812 21528 21720 21701 21792 21679 21749 21800 21741 21770 21708 21694 21596 21654 21775 21615 21623 21527 21768 21583 21935 21729 21873 21817 21703 21803 21804 21083 21799 21728 21819 21626 21798 21844 21776 21724 21589 21736 21590 21778 21746 21873 21664 21808 21699 21769 21593 21821 21715 21780 21682 21700 21776 21739 21760 21723 21709 21795 21784 21747 21707 21732 21772 21793 21769 21799 21686 21852 21600 21840 21673 21850 20911 21895 21697 21934 21532 21902 21575 21959 21587 22050 21570 22003 21571 21920 21479 21920 21605 21900 21585 21840 21699 21810 21607 21840 21616 21821 21592 22020 21522 21913 21651 22306 21482 22044 21407 21851 21689 21763 21562 22031 21384 21943 21619 21884 21657 21959 21413 21948 21609 21864 21600 22017 22082 21863 21705 21805 21664 21899 21573 21959 21627 21909 21529 21980 21528 21936 21639 21926 21552 21945 21441 22016 21573 21927 21481 21845 21600 21839 21521 22062 21479 21910 21414 21963 21536 21913 21516 21801 21632 21842 21568 21666 21482 21990 21543 21865 21549 21952 21422 21842 21432 21984 21537 21924 21371 21800 21535 21941 21452 21940 21504 21874 21503 21856 21529 21893 21613 21909 21504 21839 21573 21895 21548 21889 21492 21853 21559 21953 21621 21880 21552 21856 21467 21975 21450 21915 21588 21941 21536 21884 21465 21861 21497 21815 21625 21914 21588 21920 21526 21923 21464 21761 21516 21867 21541 21705 21455 21799 21628 21910 21655 21850 21642 21770 21604 21833 21464 21728 21380 21829 21454 21632 21640 21911 21679 21828 21652 21767 21542 21655 21499 21979 21772 21851 21564 21684 21491 21712 21799 21943 21649 21851 21436 21703 21783 21991 21706 21799 21493 21635 21760 21863 21607 21696 21578 21912 21851 21777 21518 21774 21784 21989 21637 21863 21800 21799 21829 21857 21706 21581 21892 21696 21743 21525 21837 21749 21765 21724 21824 21760 21732 21762 21824 21713 21703 21793 21666 21527 21776 21881 21800 21689 21793 21632 21800 21820 21799 21703 21964 21744 21804 21827 21815 21621 21858 21553 21868 21645 21837 21761 21767 21717 21815 21604 21876 21526 21931 21547 21847 21642 21799 21708 21737 21696 21808 21624 21888 21669 21937 21605 22000 21564 22017 21710 21936 20428 20911 20675 21000 20820 20956 20815 20995 20828 21113 21970 22169 21879 22093 21783 21096 20794 21208 20874 21248 20998 21333 21008 21302 21083 22263 21906 22112 21842 22081 21790 21337 21221 21453 21207 21487 21242 21376 21219 21468 21933 22164 21696 22193 21614 22140 21188 21551 21219 21588 21330 21568 21351 21605 21314 21651 21753 21917 21749 22126 21569 21796 21560 21721 21322 21823 21472 21727 21435 21965 21341 22124 21490 21988 21521 21985 21332 21906 21593 21894 21558 21872 21556 22004 21444 21878 21531 21898 21584 22208 21491 21914 21469 21971 21501 21888 21616 22021 21520 21934 21536 21856 21605 21827 21623 21831 21584 21960 21521 21895 21655 21797 21639 21913 21592 21882 21557 21876 21548 21984 21513 21832 21572 21827 21534 21907 21572 21909 21610 21776 21566 21969 21643 21798 21720 21725 21609 21823 21526 21817 21641 21761 21547 21962 21512 21778 21708 21862 21664 21911 21956 21853 21781 21713 21561 21975 21492 21785 21720 21643 21536 21920 21671 21733 21626 21963 21504 21761 21747 21568 21559 22011 21497 21717 21769 21818 21419 21760 21790 21780 21565 21993 21696 21685 21821 
33112 37648 35348 34851 33757 36493 33635 38000 33629 36912 34181 37041 34294 36218 35801 34937 36234 35104 35633 34863 34656 35784 37270 36455 33845 36023 35089 37008 35142 35290 36000 36207 36086 35436 36029 36439 34061 36664 35856 37330 33817 37335 35432 35769 35895 37252 35907 35651 35797 36691 33625 37163 33765 37936 42343 38230 42888 37736 33666 36498 34472 35344 35164 35817 35584 37799 34472 37907 40469 38136 43028 38384 33263 36250 34163 36853 34144 35389 34359 37849 33302 38368 33371 38341 42304 38562 34805 37512 34688 38950 35084 35560 34157 36720 33296 36928 42965 38913 41589 38453 42866 38858 34342 38630 33959 36502 33232 36829 32567 38018 41383 37796 35131 35495 41657 37802 33675 35204 41914 36631 34196 37329 33064 37331 42125 38400 42411 37357 42848 39000 41552 36520 42411 36716 41600 35857 33017 36468 40960 38016 33123 36889 42442 37226 34138 37025 43076 36629 32776 36902 42544 36987 41416 38016 42418 36914 41656 37903 42411 36187 41712 38116 42259 36758 41091 38370 33211 36206 41345 37490 42473 36204 33244 36735 42480 36657 33237 35924 42771 36720 33792 36326 42284 36496 41703 36060 42244 35771 33031 36841 33245 36656 33186 39244 36504 33872 35587 38505 34789 37872 35238 38092 33636 36986 34306 37627 32951 37392 34666 37556 42944 37001 33759 35752 32512 35255 34252 37285 32914 36868 34818 37207 34554 36209 33782 35805 42044 38640 33601 34780 42539 37484 33096 36442 34241 36405 33368 34337 35239 35921 42201 34736 35753 36301 32916 37405 36391 35700 33489 37148 33188 34735 32893 37576 33319 35388 35049 37228 33089 33501 35991 36577 32826 35435 35552 35408 34253 38192 34082 35221 34359 37074 35367 42034 34950 35533 34377 34318 37072 34693 34016 34616 37964 32984 35715 35456 35834 33336 35781 36935 35131 35376 36771 35226 34007 36155 36752 34848 36063 35717 35896 42944 36114 36592 35513 34368 36768 34304 34946 35271 37218 35380 36197 36019 35804 34711 36330 34625 34806 34456 37201 34137 36571 35866 37152 33976 38060 33548 35661 34592 37706 33432 37095 35904 39506 35049 37741 33271 36034 35093 36452 33826 37779 33915 36653 34639 37194 42868 38539 33632 35380 34411 37853 33092 37172 34768 35239 33343 38929 34716 38041 34315 37186 34329 38209 33069 36144 33977 37684 42771 38444 35104 34738 34244 38453 34208 38677 36731 39232 36553 40792 34905 40960 36716 40268 35510 41393 35664 38345 35085 38897 34428 37873 34794 38485 33245 38357 42929 37120 34714 37875 33507 37290 33037 37069 42213 38096 33005 37526 33809 38336 42427 36664 42702 38168 34457 38628 32811 37170 41714 38165 34413 37397 34361 37189 42454 37324 34618 37085 33362 38000 32729 36002 42316 36873 34246 39564 33752 36288 42637 37030 34039 36512 33480 37585 33431 37200 32832 37669 33433 36800 32952 36907 33857 35950 33364 37148 33755 36196 34725 36577 42114 36485 33858 37268 32587 36736 34337 36150 43113 38135 34989 37511 42683 37960 33484 35368 32488 37704 33780 36644 42211 37680 34584 35632 32957 37595 33936 40112 36544 36969 42437 34706 35896 36153 32760 33433 35718 36467 42208 34902 35553 36352 34427 36290 34053 38496 34455 35832 33914 35907 36608 38160 33920 34624 32948 38183 35735 36117 42896 35208 35456 37124 35745 35479 39790 35043 36074 36537 37291 35840 35468 34257 36616 36917 37592 33848 34793 33317 36138 35696 35588 37090 36518 36864 35733 34706 33808 33315 35123 35840 36531 36615 36928 35750 37261 34604 35989 41491 35568 33733 36288 35163 37227 35913 38447 35968 38682 38835 40119 37387 41831 40733 42905 40766 42496 38884 39756 35763 38251 35200 38604 36396 38662 36452 38408 35216 36336 42956 35960 33928 37258 34893 38251 35900 38293 35845 37408 33448 35113 42485 37433 33657 37728 34587 38320 34609 38619 34582 37978 32835 38780 42704 37192 33744 37456 34994 37721 34724 36640 33012 36261 34029 36228 34896 37673 35184 39072 34688 37036 32570 37450 32709 38498 43039 38403 33642 37473 42983 39335 33628 37599 33669 37056 34101 35931 36001 36736 33637 37840 33852 37104 43089 41472 41739 38912 43018 37512 42359 38089 42182 38919 34392 37145 32855 37316 41421 38560 33008 36854 42437 37221 42272 37624 32956 37676 33090 36144 34471 37588 33104 36891 34522 38219 33716 36261 33468 36832 33509 37240 33434 37156 34336 36816 34118 37065 33794 35719 33335 37655 34264 36288 42314 37936 33018 37677 33061 35812 34392 38052 42883 34481 32952 36918 33344 36343 34927 36784 35527 37129 42933 35213 35127 37189 33649 37975 34919 37607 34484 35732 32947 37783 35193 35976 33697 36049 35789 36208 42102 34481 36791 37252 42663 36008 36085 37984 33592 35731 33741 38336 33366 34272 41646 38272 34199 36133 42200 37984 41428 41001 39226 40613 42924 33863 40166 40983 42956 33365 37208 36834 36521 36128 36507 35939 36649 37028 37976 41639 37401 36075 37514 40132 35517 36402 37028 34661 34007 36178 36844 35671 34176 35910 36058 35544 33470 35783 36680 35128 34680 35249 36921 34485 35296 35594 37601 34145 35653 35078 37080 32608 36246 35882 35776 34024 36499 35808 36210 33536 37559 35809 37998 35878 37257 34212 36451 35560 37700 33285 36417 34999 37624 42601 36787 35144 36296 32869 37680 35719 36096 33352 38184 33546 35256 34512 38520 32881 37674 34577 37978 41447 38170 35473 37453 32965 37776 35058 37876 34440 38724 33047 36155 34972 38227 34124 35978 35105 38437 34357 37903 34455 37794 42373 38312 34416 36168 33536 39204 42368 37332 33565 37804 33344 37713 32951 36551 33207 37288 42980 38220 34337 37190 42512 37685 34586 36532 32805 37671 42403 36820 33400 37605 43052 38415 32984 37793 42773 37464 33168 37700 34304 38248 42688 36467 42522 38266 33764 35465 34391 36617 42792 37408 33679 36961 32584 37936 33187 35824 33072 37232 33802 35956 33856 37217 33185 38373 33204 36416 33507 37973 33513 37499 33421 37699 42141 37273 33271 36967 42656 37540 33289 33281 39947 35656 41837 35369 42210 35175 41480 36134 35025 37016 34076 38606 34625 37867 33735 38752 34275 35716 35099 36700 34073 37976 35521 35609 42331 37896 34297 34537 35893 36247 38497 38656 33672 34284 32709 37516 33545 35707 36295 35054 34034 38497 33511 34295 33644 38217 33088 36425 36442 35385 42641 37184 35280 35285 33750 37292 33987 36295 35761 36910 42624 36293 35514 37172 37305 35904 35527 35191 34579 36471 37843 33106 36673 36600 34648 34265 37028 35414 36038 35784 35783 35025 34248 35435 37080 33828 36333 36821 34753 35464 36104 35813 34876 35776 36677 36960 36053 35632 35680 34533 36527 34695 34805 36365 36147 33358 36689 35947 37442 35232 36918 35241 37102 35424 35780 36040 35917 43010 36999 34243 37429 35040 36656 33013 35004 32725 37620 34800 37820 35505 37912 35192 37233 34355 36516 33264 36576 33781 37062 35271 38556 34832 37816 33797 36584 42368 37022 35032 38438 33873 35745 33179 38370 34043 37838 41581 37108 34535 38524 34455 35020 32951 37432 35335 37729 34512 35675 37589 37691 34584 38324 33866 38903 42537 38661 43178 37936 33084 38656 33713 38823 33062 37489 33537 38328 41188 36864 33637 37728 35232 35148 33035 37135 33354 36792 33640 38304 42368 37977 41958 38196 33686 37874 42467 36006 42314 38038 42391 37747 33007 38340 42616 38864 42336 38113 43032 36957 33881 38234 42563 37135 42450 36986 32583 36590 33952 36822 33643 36586 33593 38642 34672 37864 33621 37819 33691 36208 33647 36956 33238 36560 33776 37671 34789 37606 33493 37005 33861 37512 33594 36807 42764 35988 36768 37207 33913 36944 33521 37187 33700 36582 42673 38874 34181 37079 42981 35795 35040 38027 34530 35824 41682 38587 33952 35766 35496 38148 34449 37449 36423 37530 35560 37134 34817 37251 35373 35561 42568 37780 34228 33994 41961 38033 33602 36256 35584 37142 33360 34952 35974 36645 33840 37712 33858 34563 42560 37640 33584 34702 36332 36295 42216 38088 33089 34147 35656 35668 42059 38913 33536 34172 34843 35431 34002 36651 35771 34119 36132 35207 36327 35432 35936 34710 37729 37805 35949 37157 33910 35627 35734 34630 36309 35104 35917 36692 42684 36199 36614 34005 36601 34880 35761 35984 34240 35776 35944 35416 37088 42250 37531 34724 36532 35756 36152 35636 36196 34980 37573 34834 36697 35041 37030 35354 35810 34618 36488 35480 37136 33508 37902 37592 38151 34029 37120 35473 35649 35360 36924 34224 38104 34022 37990 34583 37705 34119 37680 34791 37346 35072 35750 34183 38827 34537 35633 34377 38629 42811 38905 34085 37120 32752 38240 33843 38699 36040 38656 35822 37504 38322 39058 38839 39188 36160 38599 35432 38772 34944 39328 42841 38938 34539 38728 35668 38470 33321 39223 33991 39795 34708 41250 36960 40899 37815 41648 36976 39530 36375 41144 36024 35963 35042 38810 34894 37654 35661 36899 34192 36978 34453 36416 34211 37591 36010 41217 38772 42568 38314 42680 38569 33452 39041 43001 37014 40181 35939 39255 36096 38755 35236 38304 34997 37888 34904 37356 34679 37465 34150 36084 33600 40936 40388 33305 40460 33250 40832 33099 40211 43254 36760 38513 35274 36816 34075 36811 33858 36156 34088 36716 34081 37608 34438 41384 33968 39152 33191 37319 42461 34742 42385 34251 42216 35005 42144 33763 42082 36172 34304 35029 35072 36668 34388 35648 34914 37223 34464 37903 34295 37483 34055 38208 33197 37536 43012 38744 42809 38983 33968 38343 38714 37284 35030 36437 42856 36204 32774 35280 42871 36560 33006 35172 35100 35856 35073 35744 36097 35782 35792 35234 35156 33952 34452 35984 34402 34344 33056 35538 33948 37832 35520 36992 36477 35288 36288 36262 38871 36394 35289 36506 34384 36073 36638 35724 35456 33838 35425 33833 35704 35618 36999 34574 36055 35096 35761 33908 36488 35343 35818 34816 34988 35648 35728 35472 35504 35340 36096 35905 35753 35305 35437 35808 36000 35804 36266 34992 36795 33856 36393 34836 36748 37109 37367 35040 37776 33224 37280 33808 38000 33926 38695 33610 38449 33715 37252 42885 37653 34149 37217 33765 36392 35128 36183 34196 36393 34053 36490 33829 38327 32977 37348 34573 41293 43048 39160 42320 37192 35101 35691 33505 38736 41692 38192 34373 37171 34667 38036 42080 38200 34248 36808 33856 38293 39181 37202 35265 36328 34507 37303 33721 37986 34570 37346 33152 38157 33076 37428 34520 37543 33271 37760 42267 38538 33784 37632 42857 37052 33880 36760 32919 39004 42992 37719 42113 38409 33102 37346 32960 36070 34075 36507 33408 34512 42680 38675 33500 36892 33498 37609 42279 36872 42196 38400 33216 37376 41841 36380 33376 37696 42516 37988 32634 36854 43264 37010 33143 37076 34343 37335 32595 36713 33672 37204 33402 36935 42851 37253 33660 37725 34385 37034 33256 36567 42727 38571 42535 37860 33856 37723 33061 37120 42649 37240 43046 36793 34406 37384 33824 37251 33088 37443 42551 35885 32896 36968 33288 35088 42603 36557 34434 37334 34733 36742 34428 35722 33954 36501 42497 35608 41476 36776 42596 34388 34198 37435 35153 36386 34461 35790 33229 34553 42984 38650 35968 36918 33619 34753 42800 35417 36246 37937 34505 36852 42329 35559 36053 38496 35328 36240 42928 34629 35427 37038 34243 34807 33646 37244 36970 35852 33007 35841 35888 38384 34450 36992 36154 36280 36555 36829 35249 33825 36997 34935 35852 33005 36616 35818 35737 35450 36259 35493 35438 35560 36270 35225 35225 35978 34615 33056 35567 37191 36143 35058 35974 34068 36017 36467 36292 35282 38041 35588 36242 36514 36496 34326 36726 33350 36928 34584 36688 35624 35829 35356 36459 33984 36960 33079 37644 33493 36745 34425 36208 35257 35609 34868 36052 34240 36869 34803 37612 34151 38254 33664 38291 35450 37539 42166 37219 34196 37424 35715 37283 35926 37524 35929 39008 38161 40321 37464 39590 36216 38692 35557 39876 36432 40014 37737 41303 37755 40937 38937 41575 37499 39528 36754 39203 36305 41280 40396 42778 40380 43268 40749 41584 40370 42848 38124 40160 35088 40386 34496 39944 39812 33768 40000 33942 40949 33622 41392 34331 40782 34769 35799 37607 35860 39910 33686 35941 33380 35307 41017 36912 42500 35991 42357 38443 41542 40058 43007 38584 33010 38101 41208 37486 34000 37120 33522 36775 33396 38355 42340 37440 33280 37131 33655 40288 43105 37768 42851 38441 43270 37267 34102 38419 32883 37672 33056 36563 34099 36418 34434 36580 33632 37824 32977 37173 34725 36135 34459 37401 33904 37114 33524 36937 33381 38001 32960 36352 33543 36391 33261 37237 33591 37302 34193 35611 33664 37928 34601 36091 35318 35545 34119 36598 33058 36306 34398 35520 33392 37920 32840 35658 35228 36937 34544 37456 37840 37037 36008 35259 33488 38184 42934 36322 35338 34464 32904 37211 34924 35524 34351 38064 32632 35444 35728 33411 33454 38630 43102 35703 35800 36407 42192 35763 36160 35846 33674 38336 34983 34936 36535 
22394 22759 22643 22362 22619 22413 22633 22661 22728 22647 22562 22663 22589 22663 22601 22405 22680 22439 22671 22496 22784 22582 22632 22688 22627 22620 22593 22635 22708 22622 22709 22460 22863 22395 22825 22481 22813 22508 22743 22585 22612 22580 22623 22557 22659 22370 22829 22613 22805 22396 22816 22400 22838 22468 22792 22530 22765 22530 22779 22471 22763 22321 22840 22292 22882 22324 22844 22500 22808 22521 22634 22495 22731 22555 22811 22361 22837 22724 22871 22240 22954 22376 22829 22486 22739 22517 22765 22596 22724 22496 22716 22404 22866 22237 22829 22443 22904 22409 22787 22472 22785 22401 22857 22304 22804 22335 22928 22432 22790 22331 22773 22470 22725 22507 22714 22417 22699 22439 22781 22418 22773 22368 22839 22184 22785 22260 22791 22426 22734 22352 22788 22386 22682 22381 22704 22359 22688 22362 22687 22420 22674 22519 22717 22425 22713 22243 22778 22385 22800 22582 22927 22464 22917 22496 22936 22359 22843 22366 22919 22403 22814 22435 22928 22464 22833 22400 22945 22473 22813 22506 22952 22436 22828 22585 22920 22552 22969 22534 22822 22464 22121 22583 22807 20546 21145 21075 21481 21184 21468 21306 21639 21431 21572 23255 23334 22935 23116 22868 23057 22630 22897 22758 23047 22566 22634 22692 22857 22538 22887 22593 22861 22565 22871 22562 22803 22516 22767 22768 22826 22550 22886 22695 22876 22532 22892 22536 22664 22443 22879 22592 22738 22595 22827 22572 22606 22664 22723 22498 22552 22764 22804 22518 22714 22739 22727 22593 22956 22616 22695 22444 22871 22501 22690 22646 22962 22521 22800 22839 22721 22471 22605 22765 22749 22549 22978 22512 22470 22471 22834 22712 22577 22871 22726 22784 22633 22852 22739 22621 22567 22861 22604 22859 22566 22717 22521 22776 22616 22791 22520 22848 22753 22584 22608 22861 22606 22720 22695 22754 22432 22817 22636 22758 22509 22863 22658 22589 22610 22848 22500 22797 22673 22897 22453 22903 22631 22872 22615 22808 22546 22648 22648 22855 22432 22870 22633 22839 22613 22876 22528 22744 22608 22835 22380 22983 22548 22824 22628 22977 22414 22913 22656 22825 22537 22863 22234 22837 22555 22856 22516 22927 22501 22844 22554 22812 22423 22980 22442 22833 22513 22857 22375 22838 22669 22755 22528 22987 22921 22800 22605 22849 22535 22955 22416 22838 22582 21461 21159 21917 21437 21862 21623 21925 21657 21960 21505 23341 22921 23171 22637 22996 22759 22996 22620 22984 22604 22825 22601 22877 22446 22816 22656 22827 22933 22955 22567 22863 22502 22868 22464 23284 22476 22846 22471 22897 22468 22775 22339 22933 22458 22797 22447 22940 22453 22720 22501 22803 22428 22856 22602 22818 22471 22801 22503 22740 22558 22836 22485 22711 22528 22767 22572 22832 22622 22807 22315 22834 22508 22738 22377 22758 22440 22747 22493 22880 22500 22897 22560 22839 22490 22713 22543 22824 22507 22743 22616 22888 23048 22819 22555 22706 22656 22842 22646 22711 22341 22844 22512 22679 22464 22794 22618 22695 22471 22759 22515 22646 22721 22836 22538 22798 22784 22646 22400 22528 22738 22795 22460 22659 22722 22727 22475 22560 22734 22749 22743 22550 22457 22896 22599 22688 22521 22673 22856 22985 22552 22542 22479 22895 22751 22624 22489 22807 22541 22626 22798 22750 22728 22455 22840 22716 22942 22532 23156 22518 22855 22615 22904 22698 22636 22600 22628 22473 22635 22595 22772 22700 22816 22728 22697 22570 22672 22519 22712 22579 22842 22679 22905 22653 22861 22614 22720 22973 22572 22452 22768 22624 21680 21671 22001 21819 22022 21745 22085 21777 22074 21911 23392 22941 23168 22741 22884 22621 22855 22661 22841 22701 22966 22693 23013 22540 22841 22405 22782 22500 22819 22574 22967 22533 23008 22608 22877 22481 23323 22532 22736 22431 22896 22465 22963 22470 23027 22519 22909 22480 22676 22299 22818 22505 22968 22535 22994 22664 22860 22404 22672 22307 22820 22507 22982 22584 23009 22528 22872 22290 22872 22480 22899 22436 22774 22445 22768 22618 22864 22425 22945 22410 22834 22392 22933 22490 22883 22535 22780 22445 22724 22557 22893 22430 22897 22423 22882 22279 22941 22494 22752 22464 22804 22225 22833 22475 22779 22420 22742 22467 22790 22541 22791 22413 22776 22450 22868 22464 22689 22513 22724 22569 22750 22459 22786 22384 22752 22554 22797 22457 22752 22528 22816 22495 22708 22487 22804 22449 22722 22489 22789 22558 22672 22384 22624 22471 22791 22517 22753 22432 22766 22528 22753 22255 22748 22604 22796 22479 22612 22668 22645 22610 22767 22559 22786 22496 22660 22338 22764 22628 22732 22528 22724 22647 22743 22391 22557 22747 22667 22534 22601 22717 22827 22554 22549 22508 22924 22613 22561 22573 22836 22535 22700 22665 22192 22108 22199 21953 22035 22199 22189 22048 22071 23114 22965 23053 22666 22756 22776 22872 22508 22776 22659 22712 22488 22707 22728 22772 22656 22726 22722 22736 22557 22533 22735 22822 22577 22574 22605 22818 22567 22618 22540 22739 22625 22645 22600 22861 22479 22711 22631 22958 23041 22747 22622 22784 22465 22709 22669 22726 22404 22875 22604 22741 22573 22884 22537 22659 22574 22803 22528 22657 22565 22967 21905 22762 22566 22823 22359 22874 22587 22786 22404 22880 22535 22859 22496 22848 22465 22716 22533 22965 22519 22831 22493 22872 22264 22987 22533 22791 22485 22938 22533 22722 22484 22885 22445 22675 22599 22882 22498 22830 22528 22846 22217 22912 22511 22860 22536 22999 22432 22704 22484 22765 22376 22917 22441 22767 22292 22883 22369 22785 22510 22820 22393 22750 22483 22775 22451 22849 22451 22824 22428 22785 22381 22813 22395 22888 22319 22699 22479 22909 22336 22917 22413 22731 22417 22779 22421 22711 22460 22913 22384 22839 22456 22835 22450 22871 22456 22731 22300 22866 22426 22743 22484 22733 22452 22784 22554 22759 22433 22847 22405 22623 22438 22772 22437 22629 22552 22694 22409 22822 22519 22757 22616 22451 22208 22427 22119 22547 22204 22567 22423 22429 22068 22941 22612 22704 22483 22876 22680 22280 22674 22668 22480 22624 22714 22753 22443 22821 22570 22737 22624 22678 22460 22656 22607 22687 22695 22926 22499 22663 22713 22651 22439 22593 22720 22609 22505 22897 22468 22629 22740 22631 22475 22528 22724 22681 22562 22836 22529 22495 22572 22901 22404 22649 22793 22556 22439 22798 22805 22652 22621 22468 22824 22497 22662 22616 22797 22329 22840 22528 22640 22536 22720 22600 22731 22620 22698 22621 22617 22739 22710 22472 22765 22683 22647 22493 22716 22523 22663 22665 22743 22359 22809 22619 22593 22518 22937 22476 22823 22518 22752 22441 22800 22497 22711 22528 22840 22509 22668 22496 22841 22581 22820 22509 22688 22521 22807 22627 22800 22535 22687 22408 22746 22293 22787 22544 22775 22628 22812 22599 22824 22535 22816 22599 22777 22498 22804 22425 22810 22376 22939 22533 22912 22309 22879 22473 22912 22457 22645 22905 22813 22536 22868 22355 22778 22543 22854 22573 22791 22343 22780 22452 22894 22561 22824 22394 22550 22348 22865 22359 22871 22421 22767 22388 22759 22458 22823 22477 22675 22391 22775 22432 22842 22296 22811 22426 22763 22557 22708 22404 22726 22424 22807 22464 22840 22364 23377 22256 22868 22417 22756 22404 22785 22423 22729 22301 22739 22443 22856 22416 22810 22396 22860 22429 22647 22396 22745 22480 22737 22471 22757 22516 22711 22439 22589 22403 22798 22464 22659 22427 22697 22457 22673 22394 22696 22379 22717 22432 22724 22325 22694 22316 22729 22489 22801 22610 22800 22386 22688 22389 22555 22410 22839 22532 22656 22470 22626 22464 22837 22592 22726 22432 22457 22598 22788 22548 22577 22391 22754 22583 22624 22383 22775 22560 22761 22388 22795 22539 22599 22664 22884 22535 22571 22378 22886 22496 22473 22575 22772 22518 22689 22752 22617 22433 22633 22685 22664 22442 22877 22470 22605 22734 22631 22459 22820 22539 22529 22775 22762 22350 22822 22454 22608 22703 22677 22556 22665 22749 22566 22724 22573 22328 22628 22839 22359 22632 22512 22497 22575 22796 22409 22679 22535 22640 22645 22735 22641 22765 22476 22789 22568 22594 22664 22604 22621 22794 22458 22768 22501 22677 22607 22599 22557 22706 22465 22823 22440 22810 22425 22766 22576 22567 22717 22677 22549 22890 22313 22836 22509 22756 22556 22645 22544 22310 22505 22754 22478 22882 22382 22919 22359 22766 22505 22690 22551 22544 22544 22692 22528 22819 22440 22931 22211 22902 22465 22843 22404 22855 22535 22803 22533 22924 22441 20972 20848 21432 21068 21597 21016 21596 21016 21635 21187 23530 22896 23212 22705 22885 22686 22754 22679 22795 22618 22831 22626 22791 22553 22927 22471 22985 21075 21690 21219 21796 21243 21809 21370 21910 21425 21895 22765 23217 22740 23098 22530 22959 22586 22981 22496 22964 22549 22812 22455 22912 22425 22837 22416 21711 21476 21852 21603 21973 21649 22045 21690 22111 22807 23141 22624 22917 22500 22791 22471 22794 22548 22739 22504 22744 22415 22796 22518 22705 22488 22692 21737 22062 21948 22182 22036 22260 22071 22325 22020 23059 22657 22912 22585 22907 22533 22881 22475 22848 22489 22807 22428 22796 22420 22750 22377 22851 21988 22415 22167 22612 22175 22592 22187 22565 22240 22563 22708 22902 22439 22839 22664 22869 22426 22721 22338 22621 22342 22729 22422 22707 22579 22734 22662 22685 22603 22688 22727 22557 22673 22545 22637 22520 22655 22642 22676 23120 22713 22439 22594 22704 22464 22523 22476 22552 22453 22752 22556 22989 22400 22872 22393 22864 22478 22897 22599 22600 22535 22530 22514 22763 22420 22742 22547 22422 22569 22555 22617 22485 22724 22134 22854 22499 22880 22360 22784 22551 22648 22510 22617 22548 22607 22681 22627 22611 22528 22541 22472 22630 22528 22619 22624 22624 22721 22625 22792 22529 22729 22487 22760 22574 22821 22375 22777 22389 22760 22499 22832 22421 22717 22503 22663 22485 22695 22568 22722 22482 22727 22528 22669 22626 22704 22503 22602 22534 22721 22566 22710 22419 22820 22391 22839 22365 22805 22407 22803 22456 22962 22487 22793 22252 22867 22529 22604 22504 22855 22250 22941 22407 22727 22504 22759 22407 22906 22333 22741 22456 22727 22432 22843 22436 22666 22470 22825 22257 22932 22440 22773 22458 22831 22302 22871 22457 22741 22433 22959 22167 22863 22386 23108 22482 22789 22241 22810 22365 22784 22350 22812 22388 22733 22221 22769 22385 22738 22496 22896 22385 22786 22392 22633 22448 22695 22416 22308 22423 22869 22320 22776 22412 22821 22349 22762 22164 22736 22423 22756 22281 22805 22408 22855 22450 22797 22433 22659 22382 22690 22421 22831 22471 22802 22405 22726 22359 22736 22494 22708 22407 22713 22451 22603 22467 22775 22469 22657 22388 22629 22475 22611 22487 22764 22468 22721 22371 22660 22341 22097 22411 22693 22471 22762 22548 22747 22450 22754 22438 22664 22410 22672 22447 22685 22497 22577 22343 22737 22668 22817 22631 22684 22554 22631 22520 22693 22415 23142 22345 22694 22615 22796 22505 22591 22438 22487 22625 22528 22668 22794 22528 22561 22384 22625 22389 22827 22612 22602 22391 22408 22318 22759 22643 22630 22370 22762 22599 22772 22494 22535 22465 22668 22624 22646 22417 22410 22561 22652 22668 22600 22457 22408 22775 22800 22656 22480 22867 22663 22594 22493 22692 22548 23072 22498 22700 22640 22553 22576 22781 22604 22650 22537 22588 22519 22778 22499 22541 22640 22800 22311 22731 22549 22648 22617 22738 22373 22865 22534 22720 22516 22696 22521 22753 22300 22813 22512 22744 22618 22555 22540 22698 22492 22766 22375 22825 22260 22884 22493 22732 22540 22668 22520 22660 22532 22650 22512 22753 22565 22792 22442 21109 20896 21440 20941 21522 21140 21621 21200 21581 23083 23343 22834 23178 22677 22970 21317 21640 21474 21748 21568 21716 21665 21792 21724 21950 23024 23275 22824 22968 22823 21813 21655 22000 21760 22144 21744 22182 21834 22274 21655 23427 22678 23070 22676 22953 22569 22214 22080 22343 22011 22356 21976 22381 21973 22442 22679 23064 22435 22848 22519 22849 22233 22464 22264 22994 22263 22507 22103 22673 22163 22599 22545 22868 22452 22907 22442 22780 22340 22752 22437 22791 22376 22834 22393 22730 22431 22908 22429 22882 22384 22746 22350 22716 22549 22855 22449 22820 22476 22727 22473 22688 22504 22669 22449 22737 22518 22721 22557 22734 22434 22793 22468 22733 22445 22624 22439 22743 22383 22765 22448 22679 22425 22642 22373 22761 22310 22643 22503 22567 22321 22727 22336 22663 22471 22613 22407 22792 22299 22652 22611 22519 22455 22713 22447 22567 22584 22721 22400 22609 22535 22564 22517 22864 22396 22651 22636 22783 22476 22881 22516 22656 22659 22535 22338 22787 22423 22452 22509 22731 22373 22534 22720 22645 22546 22819 22324 22519 22668 22674 22291 22588 22766 23068 22557 22642 
22497 21943 22680 21995 22565 22210 22574 22076 22533 21947 22498 21816 22710 22018 22833 21949 22871 21671 22619 21761 22489 22003 22612 22128 22544 22105 22757 22019 22616 21975 22672 21877 22695 21827 22544 22028 22531 22116 22505 22307 22689 21981 22437 21819 22630 21962 22704 21937 22498 22023 22648 22012 22414 22071 22512 22214 22346 21953 22491 22068 22584 21876 22672 22055 22697 21725 22449 22148 22355 22323 22584 22267 22224 22007 22542 21876 22941 22085 22740 22088 22397 22087 22444 22454 22363 22491 22094 22004 22631 22071 22791 21932 22853 21941 22343 22035 22216 22665 22196 22727 22076 22342 22052 21936 22575 22023 22989 22019 22695 21902 22135 22195 22088 22794 22239 22665 21991 22576 21879 22770 21967 22423 22135 22516 22290 22509 22328 22433 22496 22495 22464 22305 22304 22477 22336 22584 22252 22344 22246 22409 22342 22316 22389 22254 22420 22037 22128 22712 21669 22773 22072 22429 22295 22673 22044 22836 22168 22245 22302 22888 22045 22349 22201 22831 22295 22739 21959 22577 22002 22839 22208 22954 22107 22568 21921 22279 21792 22469 21954 22777 22119 22919 22194 22915 22104 22884 18161 18791 18164 18525 18384 18965 18322 22336 22099 22629 21827 22018 21844 22588 21626 22064 21694 22327 21563 21884 21799 22523 21465 22009 21835 22133 21376 22055 21709 22115 21110 22106 21719 22046 21248 22228 21656 22108 21225 22448 21499 22101 21280 22488 21399 21921 21504 22267 21344 21985 21601 22220 21131 22063 21617 22021 21200 22032 21616 22043 21376 22337 21690 22166 21384 22379 21456 21861 21414 22316 21367 21824 21495 22091 21139 22169 21275 22013 21218 22237 21376 22167 21544 22205 21363 22066 21396 22016 21438 22045 21416 21961 21482 22102 21315 22039 21540 21951 21091 22163 21320 21968 21372 22140 21280 22213 21335 21945 21325 22068 21428 21894 21135 22106 21603 21927 21411 22074 21415 22101 21413 22071 21216 22016 21554 21985 21429 21973 21440 21879 21415 22096 21450 21863 21557 22012 21490 22041 21378 21840 21528 22067 21408 21872 21667 21901 21309 22166 21399 21669 21524 22106 21504 22088 21604 21995 21489 21869 21465 21811 21804 22009 21428 22257 21521 21588 21936 22002 21421 22354 21473 21912 21961 21777 21366 22253 21614 21739 21903 21771 21371 21862 22141 21623 21437 22554 21556 21634 22183 18855 18889 19651 18855 19278 19447 19537 19143 19506 22578 22290 21994 22793 21812 22200 22401 22176 21752 21891 22304 21900 21738 22220 22580 21437 22183 21873 22259 21408 22458 21777 21964 21602 22329 21760 21904 22017 22089 21482 22104 22007 21922 21729 22379 21815 21770 21836 22234 21589 22026 21934 22136 21584 22069 21788 22019 21590 22295 21683 21989 21792 22343 21954 22102 21850 22123 21440 22199 22039 22144 21335 22239 21758 22081 21658 22353 21590 21803 21613 22424 21610 22028 21932 22401 21416 22037 21804 22245 21201 22160 21806 22185 21352 22341 21732 22210 21456 22553 21727 22022 21369 22503 21624 22145 21491 22419 21525 22147 21522 22461 21463 22007 21605 22464 21511 22187 21792 22269 21478 22045 21625 22420 21315 22176 21800 22481 21569 22151 21819 22496 21456 22254 21433 22346 21398 22241 21368 22150 21529 22337 21324 22156 21433 22359 21551 22228 21614 22187 21463 22373 21492 22169 21712 22311 21658 22252 21414 22278 21174 22085 21446 22393 21293 22243 21379 22120 21298 22215 21411 22437 21607 22368 21563 21965 21373 21998 21316 22057 21589 22202 21540 22344 21757 22049 21559 22181 21417 22190 21524 22184 21520 20128 19659 20180 19558 20327 19629 20253 19859 20247 19865 22684 22145 22504 21838 22379 21875 22343 21735 22266 21927 22455 22008 22213 21848 22224 21760 22084 21489 22204 21797 22415 22248 22267 21728 22041 21678 22117 21675 22006 21597 21910 21817 22292 22291 22548 21905 21913 21673 21935 21656 21907 21716 22291 22165 22396 21831 21922 21813 21887 21585 21779 21804 22487 22151 22222 21686 21770 21560 21744 21700 22244 22144 22444 21749 21892 21594 22008 21608 22452 22430 22168 22444 21892 22080 21806 22039 22123 22393 21892 22223 21376 22071 21904 22430 21888 21992 21642 22107 21966 22301 22022 22049 21632 21856 21968 22279 21996 22006 21549 22200 22103 22213 21794 22103 21710 22399 22016 22289 21571 22176 21972 22500 21810 22256 21683 22427 21975 22165 21539 22163 21946 22408 21744 22054 21636 22574 21828 22170 21475 22368 21952 22372 21591 22096 21925 22612 21672 22168 21478 22576 21958 22216 21467 22344 21783 22511 21733 22144 21869 22600 21536 22210 21522 22671 21698 22342 21328 22665 21788 22359 21385 22400 21780 22421 21612 22263 21859 22371 21691 22016 21766 22501 21794 22212 21629 22624 21825 22407 21546 22633 21462 22350 20116 21135 20197 20948 20297 21312 20487 21297 20631 22759 21947 22476 21859 22353 21959 22501 21486 22503 21725 22342 21522 22535 21647 22368 21513 22342 21611 22572 21521 22405 21591 22519 21593 22488 21778 22384 21683 22138 21944 22241 21722 22346 21888 22195 21623 22186 21824 22219 21536 22168 21900 22222 21031 22373 21778 22109 21576 22340 21622 22323 21561 22477 21543 22098 21838 22338 21623 22290 21779 22144 21584 22107 21789 22279 21524 22261 21813 22143 21639 22407 21654 21962 21872 22320 21851 21988 22215 21988 21705 21934 22374 22183 21785 22309 21953 22119 21535 22589 21741 22106 22101 22213 21685 22072 22193 21997 21712 22000 22441 21994 21125 22192 22150 21921 21719 22555 21889 22261 22106 22264 21764 21828 22432 21981 21782 22384 22109 21884 21609 22530 21698 21906 21705 22210 22236 21802 22396 22032 21915 21713 22484 21845 22038 22016 22355 21760 22011 22157 22087 21692 22327 22235 22336 21957 22225 22214 21774 22229 22381 22230 22153 22113 22308 21655 22352 22105 22168 21751 22578 21809 22093 21965 22455 21586 22416 22079 22037 21901 22464 22003 22132 21949 22457 21714 22192 22109 22392 21433 22599 21940 22376 20983 21878 21223 21569 21224 22055 20793 21743 21429 21903 21857 22909 21943 22494 21960 22666 21815 22320 21952 22668 21523 22539 22008 22492 21623 22784 21652 22419 21879 22589 21469 22690 21895 22432 21700 22679 21916 22144 22003 22624 21488 22531 21994 22841 21716 22624 21817 22187 21893 22672 21609 22502 21662 22339 21639 22551 21648 22448 21665 22445 21686 22451 21767 22325 21705 22517 21713 21680 21776 22347 21697 22432 21814 22480 21682 22409 21648 22332 21582 22551 21720 22372 21785 22336 21603 22397 21862 22375 21688 22517 21778 22240 21687 22406 21740 22087 21942 22299 22144 22538 21631 22414 21694 22435 21678 22311 21881 22228 21736 22396 21751 22290 21748 22429 21714 22350 21856 22463 21861 22286 21664 22616 21766 22429 21864 22396 21846 22343 21696 22312 22128 22087 21797 22336 21999 22548 22237 22465 22205 22636 22085 22125 21662 22000 21897 22136 21778 22420 22321 21973 22172 22166 22048 22610 21811 22372 21700 22243 22379 22174 21824 22080 21955 22692 22009 22102 21639 22123 21827 22697 22282 22032 21910 21941 21776 22261 22423 22361 21680 21972 21770 22081 22679 22477 21731 22071 21849 22565 22432 21895 22084 22402 22348 22003 22036 21917 22390 22163 22594 21970 22138 21415 22361 22033 22482 22165 22455 22086 22231 21800 22145 21927 22350 22203 22488 22076 22080 21825 22057 21882 22520 22212 22401 22261 22502 21895 22400 21687 22064 21862 22347 21806 22374 21958 22443 22048 22465 22050 22633 22093 22569 22081 22650 21955 22570 21915 22451 21875 22888 21742 22080 21783 22471 21867 22794 22001 22688 21867 22417 21632 22443 21983 22635 22026 22404 21628 22650 22033 22690 21736 22312 21785 22730 21924 22417 21591 22900 21897 22472 21484 22663 22021 22588 21524 22877 21984 22400 21725 22658 21909 22184 21774 22797 21994 22161 22210 22704 21832 22325 22073 22540 21446 22777 21865 22621 21592 22912 21600 22448 21789 22537 21755 22551 21797 22560 21792 22453 21828 22546 21682 22388 21880 22423 21824 22422 21782 22579 21856 22377 21829 22546 21687 22609 21633 22574 21946 22326 21657 22775 21600 22515 21671 22407 21795 22576 21504 22471 21728 22497 21720 22259 22014 22536 21837 22512 21749 22597 21888 22319 21984 22321 21874 22418 21913 22509 21742 22436 21831 22370 22125 22246 22021 22370 21860 22469 21911 22492 21923 22309 22012 22328 21922 22318 21899 22403 21808 22580 21863 22465 21897 22304 21997 22291 21879 22225 21954 22203 21628 22416 22183 22621 21880 22621 21888 22344 22059 22163 22297 22144 22331 18919 18694 19057 18695 19181 19031 19677 19637 19928 19164 23595 22485 23195 22433 22705 22408 22553 22550 22676 22811 22501 22844 22439 22593 22466 22439 22176 19265 19681 19432 20087 19785 20431 19722 20583 19961 23565 22791 23621 22427 23079 22635 22352 22939 22368 22932 22145 22759 22066 22941 22033 22967 21915 22775 20029 20904 20199 20960 20475 20964 20449 21120 20461 23154 22505 23200 22562 22894 22368 23078 22092 22813 22053 22925 22162 22978 21888 22833 21971 22857 20409 21537 20569 21674 20697 21555 20849 21640 20772 21717 22184 23149 22211 23104 21976 22992 22087 22956 22181 22893 21974 22880 22014 22874 22024 22736 22125 21895 21613 22139 21479 21991 21477 22016 21671 22127 21621 22792 22360 22632 22284 22645 22238 23040 22158 22557 22197 22528 22133 22576 22161 22486 22100 22539 22216 22350 22213 22485 22048 22589 22100 22677 21970 22824 21914 22775 21949 22883 21851 22911 21393 22931 21785 22871 21693 22936 21811 22679 21941 22555 21842 22665 21987 22388 22088 22487 21984 22437 21933 22406 21974 22608 21720 22545 21989 22645 21866 22735 21629 22713 21765 22784 21976 22704 21721 22538 21732 22577 21851 22507 21895 22552 21922 22349 21952 22545 22045 22311 21848 22546 22027 22380 22029 22476 21790 22606 22048 22481 21832 22663 22017 22651 21855 22464 21779 22518 22058 22502 21934 22407 22150 22407 22088 22420 22089 22344 22133 22491 22150 22501 22011 22321 22030 22430 22147 22468 22233 22487 21951 22436 21908 22737 21947 22703 21946 22322 21981 22364 22185 22384 22117 22684 21912 22326 22361 22397 22023 22705 22023 22253 22508 22432 21932 22855 22088 22108 22554 22229 21614 22823 22037 22132 22464 22244 22236 22583 21900 22443 22389 22316 21877 22512 21984 22328 22400 22215 22076 22664 22248 22135 22256 22700 22004 22151 22482 22200 21993 22119 22641 22145 21959 22189 22713 22247 22302 21736 22371 22420 22540 22352 22293 22445 22755 22189 22293 22117 22657 22076 22198 21984 22753 22304 22395 21873 22361 22504 22689 22218 22281 21859 22359 22248 22637 22424 22567 21959 22122 22070 22641 22373 22736 22007 22428 21848 22528 22339 22705 22146 22592 22117 22375 21933 22481 22421 22759 22260 22602 21877 22289 21812 22621 22286 22816 22153 22819 22137 22537 21807 22304 21765 22592 22172 22775 22299 22823 22180 22818 22176 22685 21977 22557 21457 22423 21732 22466 21846 22656 22006 22905 22145 22915 22039 22823 21884 22644 21678 22583 21880 22801 22107 22940 22112 22546 21732 22353 22032 22707 22204 22828 21937 22353 21828 22646 22231 22805 21755 22789 21748 22706 21958 22799 21772 22633 21943 22704 21820 22470 21769 22548 22108 22625 21818 22606 21940 22599 21901 22585 21781 22799 21834 22556 21639 22805 21809 22608 21696 22696 21772 22647 21751 22824 21728 22553 21864 22754 21734 22552 21925 22568 21868 22770 21782 22331 21979 22568 22098 22705 21952 22386 21979 22373 21931 22697 21905 22468 22149 22448 22024 22545 21797 22633 21817 22553 21856 22455 22162 22439 22001 22467 21694 22504 21802 22593 21980 22629 22058 22288 21991 22294 22117 22441 22139 22387 22353 22194 22002 18785 18445 19440 18989 19683 19006 19904 19139 19835 22851 23237 22734 22985 22550 22669 19787 19856 19793 20106 19920 20121 20062 20212 20190 23099 22891 23036 22736 22869 22710 20896 20437 20918 20650 21248 20566 21500 20677 21546 21164 23360 22666 22912 22666 22672 21498 21492 21934 21462 21895 21562 21472 21334 21336 21736 23082 22956 23235 22791 22706 22681 22058 21872 22343 21629 22451 21487 22400 21831 22392 22739 22566 22647 22628 22503 22647 22472 22924 22358 22699 22344 22624 22792 22314 22436 22583 22236 22848 22208 22764 22513 22343 22438 22821 22213 22804 22033 22586 22551 22455 22298 22958 22032 22949 22401 22739 22295 22734 22272 22823 22026 22688 22314 22471 22068 22983 21871 22753 22313 22448 22300 22897 21825 22804 22386 22429 22087 22865 21899 22882 22347 22492 22062 22912 21807 22860 22279 22508 22101 22967 21735 22825 22264 22496 21955 22933 21833 22835 22225 22647 21948 22921 21909 22601 22217 22694 21977 22798 22057 22587 22261 22816 21846 22714 22150 22460 21911 22946 21805 22800 22016 22727 21866 22752 21965 22659 21890 22833 21928 22564 21897 22687 21931 22599 22241 
