# Supplementary material for: An Active Feature Selection Strategy for DWT in Artificial Taste
Source: Hindawi journal article supplement (doi:10.1155/2018/9709505), 2018-01-01
Supplement: f1 [file 9709505.f1.zip › spirit-hi-3.txt]

23297 23509 23125 23584 21702 22282 21939 22039 21769 22344 21842 22016 21803 22297 21744 22029 21744 22428 21760 21974 21872 22381 21789 22380 21938 22426 21739 22246 21959 22378 21713 22173 21899 22359 21628 22377 21806 22300 21704 22512 21888 22241 21726 22485 21771 22343 21879 22503 21808 22605 21813 22396 21644 22254 21879 22274 21669 22425 21868 22402 21901 22516 21797 22351 21684 22325 21736 22278 21680 22394 21811 22433 21785 22424 21697 22229 21797 22389 21152 22369 21946 22208 21717 22311 21734 22528 21676 22438 21746 22283 21844 22395 21703 22289 21820 22311 21761 22384 21752 22169 21831 22312 21685 22281 21896 22152 21760 22320 21901 22265 21782 22208 22184 22171 21871 22239 21782 22160 21750 22241 21944 22168 21721 22304 21824 22235 21883 22158 21728 22330 21785 22059 21975 22204 21866 22293 21776 22072 21873 22263 21891 22160 21980 22023 22021 21952 21964 22263 21818 22114 22230 22142 21960 22009 21888 22432 22092 22213 21894 21972 22297 21959 22182 21989 21916 22019 21888 22461 21800 22265 22025 22045 22091 21931 22275 22204 21972 22040 21883 22000 22344 22172 22109 22043 21433 21418 21737 21433 21908 21509 21943 21331 21901 21482 22429 22016 22365 22303 22153 22173 22320 21879 22353 22075 22156 22072 22389 21984 22302 21984 22585 22156 22249 21752 22349 22156 22439 21877 22170 21849 22519 22038 22363 21953 22225 21846 22380 21927 22417 21976 22448 21942 22384 21880 22253 21731 22308 21753 22096 21561 22236 21877 22157 21602 22158 21645 22198 21556 22217 21668 22221 21625 22232 21652 22268 21708 22299 21813 22272 21862 22437 22087 22420 21927 22472 21968 22415 21788 22336 21227 22254 21744 22377 21729 22466 21709 22325 21699 22227 21722 22238 21815 22415 21905 22273 21855 22289 21761 22087 21704 22284 21840 22354 21647 22172 21661 22564 21520 22362 21762 22317 21696 22255 21761 22357 21829 22240 21674 22144 21806 22249 21875 22349 21874 22199 21764 22369 21892 22221 21875 22080 21866 22220 21846 22170 21742 22326 21783 22202 21797 22298 21856 22132 21721 22252 21887 22248 21789 22140 21858 22179 21933 22184 21899 22116 21842 22432 21925 22124 21829 22347 21834 22008 21996 22106 21878 21824 22226 22172 21892 22313 21869 21970 21960 22085 21851 21890 22220 22118 21988 22308 21848 22010 22209 22122 21788 21838 21623 21580 21592 21854 21549 21885 21633 21688 22183 22555 22003 22112 22295 22075 21825 22236 22283 21864 22365 21952 22267 22068 22148 21881 22384 21868 22250 22006 22064 22152 22288 21880 22428 21990 22098 22158 22125 21928 22351 21896 22261 22017 22028 22083 22258 21936 22439 21916 22375 21922 22289 22033 22153 21980 22304 21766 22397 21888 22386 22006 22108 22024 22214 21865 22442 21634 22554 21744 22308 21946 22083 22003 22232 22017 22400 21774 22422 21669 22486 21790 22420 21914 22210 21944 22476 21911 22394 21782 22487 21500 22587 21689 22414 21750 22282 21910 22336 22003 22375 21860 22328 21755 22454 21574 22454 22145 22401 21708 22365 21942 22218 21894 22196 21797 22372 21720 22297 21781 22361 21797 22418 21616 22349 21600 22382 21732 22422 21912 22313 21808 22245 21635 22225 21719 22225 21638 22235 21719 22295 21756 22232 21613 22272 21623 22279 21767 22439 21658 22341 21650 22365 21800 22321 21783 22435 21943 22092 21888 22167 21754 22455 21915 22227 21937 22274 21861 22160 21906 22132 21819 22328 21937 22293 21779 22224 21724 22358 21837 22230 21851 22125 21869 22283 21940 22266 21988 22112 22042 22057 21884 21826 21369 21922 21418 21934 21541 22074 21578 22158 21653 22328 21980 22235 21913 22001 21987 21978 21969 22054 22221 22119 22317 21985 22282 22097 22137 22087 21866 22107 21783 22219 21969 22423 21904 22376 21802 22454 21798 22353 21960 22364 21888 22227 21956 22003 21888 21922 21816 22073 22063 21994 22241 21933 22108 21824 22171 22153 22240 21928 22041 22000 22155 21941 22107 22033 22053 22119 22096 22007 21979 22192 22192 21991 22154 22026 22109 22048 22248 21910 22284 21894 22439 21849 22454 21761 22423 21753 22497 21646 22433 21660 22407 21711 22450 21907 22381 21924 22407 21863 22216 21826 22334 21932 22140 21901 22208 22007 22146 21991 22044 21957 22093 22039 22264 22002 22246 21892 22317 21740 22423 21663 22498 21796 22432 21810 22349 21918 22234 21853 22287 21837 22439 21761 22468 21563 22509 21851 22414 21828 22134 21896 22370 22056 22285 21890 22461 21682 22381 21632 22466 21806 22292 21911 22421 21738 22464 21645 22391 21639 22445 21733 22473 21769 22208 21840 22250 21662 22364 21728 22229 21912 22336 21895 22230 21698 21559 21613 22455 21844 22344 21831 22372 21739 22265 21760 22174 21525 22265 21735 22432 21862 22186 21545 22115 21693 22237 21453 22050 21659 22157 21592 22312 22039 22218 21785 22197 21863 22364 21872 22362 21717 22160 21955 22155 21825 22396 21856 22186 21765 22272 21832 22280 21913 22247 21760 22144 21902 22382 21728 22279 21848 22176 21771 22121 21922 22102 21709 22147 22023 21948 21828 22285 22010 21948 21860 22289 22039 21861 21890 22147 22150 21992 21927 22101 21952 22477 21760 22474 21941 21920 22233 22360 21774 22135 21715 22091 21829 22169 22179 22364 22131 22093 21703 21978 21772 21968 21880 22095 22231 22308 22247 22328 21924 21824 22074 21952 22204 22038 22140 21804 22339 21958 22338 21895 22233 22050 22165 21909 22134 21841 22413 21945 22016 21879 22072 21986 22133 22066 22289 22129 22391 22080 22307 21871 22221 21661 22114 21829 22370 22009 22310 21834 22184 21754 22056 21807 22368 22044 22408 21357 22172 21868 22469 21952 22416 21596 22155 21834 22391 21895 22315 21642 22318 21980 22497 21664 22007 21816 22434 21925 22326 21609 22438 21904 22323 21706 22263 21795 22537 21709 22134 21874 22474 21812 22055 21930 22474 21830 22328 21674 22428 21828 22061 21672 22372 21737 22187 21952 22390 21696 22428 21827 22343 21574 22252 21648 22261 21690 22328 21602 22100 21754 22160 21863 22418 21728 22145 21708 22423 21677 22343 21785 22176 21639 22408 21665 22437 21830 22263 21569 22240 21760 22248 21828 22225 21740 22181 21843 22217 21760 22169 21792 22172 21876 22100 21856 22236 21757 22254 21836 21605 21933 22135 21811 22376 21680 22170 21927 22200 21860 22217 21765 22366 21812 22258 22029 22140 21771 22400 21708 22055 21916 21991 22044 22091 21851 22320 21888 22023 21764 21693 22181 22120 21717 21961 22001 22448 21817 21896 21930 21962 22235 22087 21740 22183 21818 22485 21875 21820 22071 22057 22369 22033 21892 21981 21750 22468 21858 22106 21888 21857 22176 21968 22124 22260 21952 22060 22542 21936 22228 21879 22305 21666 22272 21746 22252 21975 22119 22236 21872 22108 22130 21975 22135 21878 22274 21811 22348 21969 22327 21856 22301 21988 22124 21990 22088 21943 22020 21998 22162 21940 22201 21847 22329 21821 22387 21672 22382 21474 22426 21789 22453 21835 22476 21796 22347 21873 22255 21909 22324 21954 22117 22013 22112 22024 22121 22023 21815 21927 22259 21830 22320 21876 22286 21845 22332 21691 22272 21781 22400 21836 22381 21847 22329 21821 22326 21766 22344 21772 22382 21691 22472 21655 22445 21720 22472 21628 22484 21564 22589 21585 22308 21768 22349 21738 22481 21741 22418 21744 22380 21726 22343 21737 22444 21820 22263 21788 22272 21696 22446 21769 22405 21584 22389 21696 22313 21730 22423 21693 22447 21703 22411 21627 22399 21752 22339 21653 22332 21762 22294 21681 22330 21748 22300 21784 22295 21809 22327 21813 22301 21784 22313 21751 22261 21775 22348 21840 22263 21829 22297 21809 22368 21739 22247 21751 22394 21755 22227 21782 22313 21763 22346 21717 22419 21767 22276 21888 22243 21842 22471 21763 22205 21899 22250 21936 22228 21894 22008 21847 21815 21917 21945 21872 21997 21751 22115 21997 22027 22112 21987 22222 21971 21944 21981 21738 22313 21879 22327 21844 22190 21827 21992 22284 21889 21952 22215 21777 22214 21945 21736 22208 22028 22024 21976 22335 21900 22168 22052 22073 21833 22461 22052 22358 21698 22241 22009 22309 21864 22096 21970 22169 22010 22213 21879 22151 21828 22105 22080 22311 22038 22179 21945 22056 21955 22360 21953 22245 21784 22101 21873 22243 22033 22287 21931 22182 21713 22281 21986 22432 21782 22196 21664 22346 21986 22416 21959 22195 21728 22168 21565 22205 21794 22304 21902 22375 21888 22380 21867 22512 21944 22512 21920 22448 21958 22448 21945 22474 21800 22520 21703 22381 21709 22306 21445 21696 21201 21775 21426 21976 21453 22053 21671 22512 22006 22471 21657 22238 21904 22582 21952 22641 21824 22361 21806 22237 21888 22402 21877 22360 21740 21864 21368 21834 21544 22071 21506 22007 21384 22016 21909 22448 21924 22292 21771 22408 21820 22471 21660 22437 21625 22291 21781 22388 21782 22210 21762 21986 21555 22019 21417 22041 21591 22037 21640 22004 21585 22276 21976 22407 21888 22265 21758 22275 21877 22340 21824 22295 21931 22135 21797 22208 21914 22218 21587 22096 21691 22208 21733 21997 21504 22104 21722 21959 21696 22382 21952 22122 21800 22208 21996 22152 21911 22355 21868 22120 21915 22318 21909 22176 21684 22281 21855 21895 21786 22337 21847 21916 21624 22260 21829 21968 21959 22340 21864 22060 22301 22191 21792 21869 22208 21996 21929 21901 22237 21928 22198 22344 22035 22019 21700 22215 22279 21305 22129 22016 22196 21737 22283 21883 22007 22048 22333 21832 22166 22195 22058 21939 22353 21847 22119 22119 22251 21748 22280 22108 22173 21967 22307 21899 22265 21980 22240 21897 22497 21756 22190 21892 22217 21756 22352 21888 22157 22001 22320 21675 22304 21911 22144 21943 22425 21716 22299 21882 22133 21910 22360 21712 22421 21891 22167 21991 22344 21664 22449 21798 22208 21877 22225 21792 22500 21715 22338 21874 22203 21802 22461 21511 22565 21737 22324 21893 22260 21779 22453 21812 22357 21814 22167 21959 22272 21751 22440 21742 22361 21858 22202 21856 22448 21633 22413 21653 22395 21735 21658 21864 22295 21641 22369 21699 22390 21728 22090 21984 22117 21748 22295 21722 22465 21606 22212 21848 22158 21834 22147 21893 22294 21659 22326 21769 22255 21765 22193 21655 22352 21646 22330 21825 22132 21919 22134 21924 22206 21724 22299 21677 22263 21760 22120 21927 22056 21890 22125 21911 22208 21788 22221 21791 22356 21870 22261 21760 22225 21736 22300 21833 22144 21872 22205 21881 22127 21634 22192 21839 22285 21806 21981 21969 22106 22092 21994 21778 22214 21799 22292 21893 22062 21816 21960 22144 22040 22018 22041 21897 22408 21891 22198 21795 22096 22240 21936 22200 21974 21713 22343 21682 22288 21841 21952 22177 21965 22180 21975 21803 22235 21792 22392 21921 21977 21847 22158 22241 21970 21873 22027 21769 22300 21865 22222 22144 21691 22121 21856 22164 22016 22009 22028 22158 22003 22392 21824 22292 21698 22391 21853 22184 22016 21992 22144 22070 21975 22240 21844 22240 21916 22262 21993 22000 22151 22154 21958 22304 21694 22421 21702 22402 21877 22115 22032 22128 22054 22189 21960 22248 21677 22393 21755 22250 21979 22010 22045 22246 21884 22397 21560 22460 21657 22273 21949 22242 22003 22304 21818 22329 21805 22330 21975 22204 21896 22308 21767 22225 21959 22344 21772 22356 21941 22375 21764 22280 21934 22512 21703 22243 21831 22580 21909 22391 21684 22321 21543 22216 21697 22243 21711 22040 21728 22311 21930 22417 21859 22097 21681 22366 21987 22155 21902 22396 21639 22489 21805 22205 21710 22381 21648 22273 21684 22282 21667 22393 21577 22343 21826 22276 21670 22294 21826 22323 21837 22299 21783 22276 21741 22219 21827 22168 21677 22231 21724 21785 21009 22037 21212 21938 21318 21920 21394 21920 21356 22487 21824 22468 21752 22382 21863 21969 21570 21911 21634 22076 21416 22210 21400 22144 21927 22397 21907 22293 21944 22194 21625 21968 21670 21970 21635 22069 21592 22130 21690 22149 21966 22389 21864 22373 21980 22026 21648 22044 21870 22028 21754 22188 21700 22069 21644 22386 21964 22331 21928 22221 21959 22106 21793 22085 21745 22307 22253 22088 22019 22017 21908 22447 21760 22120 22194 22282 22023 22382 21729 22179 22072 22183 22450 22072 22144 22125 21862 21998 22240 22240 21921 22059 22208 22311 21857 21977 21888 22428 22105 22069 21734 21998 22120 22432 22000 22101 21860 22011 21824 22176 22282 22256 22006 22034 21809 21908 21868 22036 21978 22295 22279 21914 21929 21789 22084 21928 21793 21838 22356 22017 22337 21909 22347 22062 22220 22087 22323 22119 22307 22088 22429 22038 22247 22081 22259 22010 22257 21989 22272 21994 22170 21888 22192 21239 22023 21765 22144 21824 22182 21931 22359 22016 22427 22047 22379 21931 22192 21892 22286 21652 22072 21814 22321 21998 22386 21877 22359 21780 22125 21640 22226 21905 22384 21945 
22069 21509 22036 21459 22003 21762 21825 21769 21845 21578 21864 21451 21944 21388 21676 21400 22016 21684 22241 21970 22356 22036 22028 21641 21736 21526 21814 21587 22311 21600 21760 21540 22167 21989 22519 22016 22113 21969 21656 22008 22035 21718 21735 22011 21921 22086 21681 22368 21847 21889 21633 22455 21588 21970 21903 22295 21714 21857 22138 22006 21505 21898 22114 21760 21516 22041 22190 21803 21513 22360 21700 21849 21868 22248 21707 21939 22096 21762 22126 21989 22113 21490 22184 22055 21962 21793 22234 21965 21869 21953 22171 21733 22092 22115 21992 21555 22230 22029 21836 21810 22280 21783 22026 21975 22222 21536 22289 22081 21979 21829 22393 21785 22083 21888 22183 21722 22215 21797 22033 21797 22285 21614 22328 21830 21877 21764 22343 21420 22278 21896 22128 21747 22394 21465 22284 21784 22071 21635 22493 21458 22169 21706 22022 21589 22501 21458 22450 21682 22032 21760 22167 21577 22459 21274 22349 21749 22208 21745 22058 21799 22102 21672 22370 21516 22547 21513 22551 21436 22237 21699 22359 21472 22188 21527 22290 21457 22203 21462 22052 21650 22151 21800 22199 21616 20491 19779 20640 19800 20775 19849 20785 20064 20900 19947 22706 21703 22519 21767 22751 21875 22322 21504 22401 21657 22281 21853 22358 21703 22190 21617 22294 21589 22171 21826 22101 21762 22188 21549 22301 21577 22237 21706 22121 21596 22497 21619 22208 21624 22319 21753 22252 21536 22099 21793 22152 21558 22017 21555 22046 21560 21991 21508 22020 21672 22069 21656 22020 21719 21940 21738 21889 21637 22017 21942 21874 21587 21890 21490 21936 21613 22209 21999 22407 22065 22343 21962 22045 21544 21802 21546 21850 21684 21808 21885 22315 22140 22106 21808 21876 21365 21844 21692 21826 21843 22121 22089 21986 22267 21756 22137 21408 22006 21888 22208 21876 22234 21734 21842 21550 21859 22093 22188 22144 21996 21746 21907 22000 22162 21847 21973 21490 21927 21857 22163 21841 22032 21429 22119 21927 22236 21723 21903 21810 22311 21698 21943 21665 22365 21837 22039 21440 22429 21802 22131 21473 22301 21850 22253 21521 22215 21852 22088 21427 22315 21778 22201 21607 22453 21738 21964 21577 22438 21515 21955 21738 22402 21536 22260 21712 22172 21464 22521 21727 21981 21803 22425 21389 22146 21712 22132 21459 22491 21709 22072 21818 21055 19985 21203 20202 20860 20365 20986 20359 21336 20457 22481 21916 22443 21738 22483 21600 22400 21760 22240 21796 22396 21436 22209 21736 22107 21559 22409 21498 22407 21607 22480 21605 22311 21350 22464 21484 22198 21619 22056 21585 22261 21459 22231 21611 22257 21815 22170 21683 22251 21552 22345 21553 21992 21622 21922 21606 22166 21740 22248 21490 22104 21554 21453 21728 22053 21644 22163 21466 22219 21455 22149 21655 22025 21760 22055 21463 22128 21559 22133 21843 22408 21568 22181 21765 21890 21925 21952 21907 22212 21509 21997 21568 22346 21586 22108 21607 21815 21765 21956 22188 21813 21683 21810 21545 22217 21568 22281 21367 22380 21640 21920 21621 21891 22023 21960 22227 21700 21824 21879 21542 21903 21763 22352 21632 22312 21536 21786 22137 21760 22156 21584 22122 21504 22183 21726 22304 21741 21991 21867 21893 21872 21713 21945 21736 22064 22103 22122 21911 21906 21971 21745 22048 21685 22204 21583 22260 21561 22275 21603 22393 21737 22378 21687 22264 21780 22077 21885 21905 22007 21863 21889 21768 21853 22039 21840 22231 21672 22314 21536 22403 21431 22353 21490 22257 21931 22373 21642 22081 21825 22001 21820 21879 20886 21057 20951 21027 20992 21306 20917 21506 20769 21641 21760 22635 21462 22711 21543 22571 21408 22528 21682 22424 21634 22353 21772 22216 21770 22096 21852 21906 21751 21941 21902 22184 21639 22224 21589 22339 21516 22488 21520 22133 21463 22219 21435 22280 21417 22201 21361 22203 21483 22255 21532 22394 21516 22343 21526 22228 21501 22103 21316 21976 21557 22235 21373 22166 21493 21360 21552 22100 21517 22115 21575 21991 21460 22142 21451 22087 21547 22071 21548 22162 21482 22071 21327 22123 21400 22215 21409 22186 21596 22275 21440 22250 21697 22280 21552 22120 21591 22198 21504 22147 21516 22009 21526 21995 21517 21983 21512 21991 21586 22400 21751 22140 21722 21963 21565 21917 21716 22032 21534 22064 21783 22359 21588 22113 21509 21861 21683 21939 21892 22016 21718 22086 21277 22121 21811 22341 21448 22045 21573 21936 21911 21825 22013 21819 21696 21806 21592 22349 21588 22157 21521 21795 22104 21836 21469 22477 21620 21861 22169 21778 21698 22423 21550 22044 22036 22005 21513 21747 22096 22087 22323 21511 21771 22045 22339 21815 21943 21306 21904 21596 21877 21688 21842 21539 21802 21739 21991 22126 22172 21820 21753 21080 21463 21425 21344 21223 21553 21431 21495 21263 21629 22055 22146 21765 22295 21872 21955 21769 22375 21617 22056 21993 21890 21595 22413 21733 22077 21896 22227 21343 22240 21860 22090 21515 22357 21819 21868 21617 22312 21693 22064 21746 22389 21695 21844 21628 22371 21743 22004 21505 22415 21541 21975 21672 22448 21597 21996 21572 22387 21625 22164 20964 22382 21815 22263 21460 22093 21798 22447 21907 22257 21440 22143 21607 22249 21879 22367 21661 22247 21477 22040 21539 22293 21304 22125 21533 22354 21588 22261 21521 22001 21362 21885 21445 22157 21355 22146 21485 22074 21430 22066 21533 22199 21542 22141 21412 22185 21468 22179 21348 22205 21272 22253 21359 22004 21400 22162 21649 22290 21603 22343 21521 21976 21488 22076 21485 22082 21475 22106 21664 22263 21658 22062 21494 22123 21580 22230 21706 22133 21443 22613 21501 22165 21648 22112 21463 22123 21608 22176 21490 22109 21563 22017 21655 22184 21563 21989 21412 22228 21843 21907 21531 21888 22035 21999 21579 21818 21780 22193 21687 22265 21557 22453 21528 21838 21624 22420 21617 21820 21460 22501 21404 21914 21700 22451 21648 21918 21972 21985 21464 21714 22086 21821 21283 21793 21801 21479 21309 22049 21252 21569 21152 22119 22068 21675 22339 21955 22138 21801 22339 21832 22019 21993 21922 21825 22220 21728 21762 22055 21955 21561 22132 21913 21796 21940 22147 21388 22288 21874 22042 21856 22246 21479 22151 21836 21761 21923 22059 21416 22251 21557 21947 21780 21965 21505 22225 21416 22348 21692 21840 21862 22236 21467 22352 21648 22028 21926 22106 21652 22277 21322 22305 21661 22105 21748 22248 21543 22465 21297 22437 21460 22301 21681 21938 21716 22064 21538 22416 21393 22415 21474 22082 21859 22166 21781 22151 21370 22314 21497 22480 21539 22132 21363 22148 21504 22141 21538 22153 21449 22298 21520 22333 21396 22213 21582 22134 21689 22194 21584 22272 21367 22097 21494 22264 21382 22235 21312 22217 21499 21556 21555 22186 21481 22237 21383 22093 21402 22281 21489 22217 21417 22256 21546 22031 21593 22063 21710 21962 21733 22116 21689 22130 21622 22060 21477 22118 21432 22273 21592 22226 21480 22234 21420 22091 21514 22135 21472 22112 21572 22057 21640 21993 21815 22205 21773 21994 21958 21754 21795 22056 21895 21828 21857 22060 21616 21945 21838 21849 21669 22045 21760 21819 21812 21907 21813 21732 21708 21772 21623 21779 21443 21853 21510 21818 21482 21989 21545 22199 21527 22245 21703 22552 21633 22441 21581 22267 21496 22263 21553 22419 21504 22214 21808 21831 22124 21853 22024 21806 21960 21693 22026 21611 22016 21702 22002 21914 22133 21775 21924 21675 21919 21750 21897 21761 21895 21769 21848 21842 22016 21790 21940 21864 22040 21778 22089 21808 22135 21828 22182 21820 22071 21771 21953 21742 22112 21819 22208 21831 22129 21639 22119 21517 22225 21725 22196 21560 22131 21678 22057 21676 22156 21717 22084 21609 22219 21564 22296 21431 22285 21558 22405 21465 22433 21472 22351 21317 22477 21221 22506 21318 22528 21199 22423 21308 22375 21852 22424 21463 22209 21697 21977 21776 21996 21809 22165 21767 22296 21508 22406 21248 22583 21358 22239 21486 22224 21576 22178 21454 22220 21443 22133 21485 22221 21542 22020 21557 22103 21700 22087 21344 22433 21463 22132 21442 22325 21646 22220 21328 22267 21376 22198 21560 22171 21447 22198 21496 22071 21631 22166 21497 22077 21474 22048 21471 22117 21628 22176 21521 22034 21536 22130 21696 22135 21428 22024 21680 22128 21661 22067 21467 22003 21428 22193 21755 22160 21445 21975 21467 22103 21607 21893 21470 21781 21491 22040 21622 22059 21660 22197 21779 22277 21820 22273 22053 22339 22043 22272 21865 22033 21574 21939 21575 21927 19905 20178 20006 20513 20154 20529 20594 21056 20800 22376 21975 22102 21879 22184 21703 22155 22255 22586 21991 21975 21626 22027 21596 22082 22128 22523 20375 20539 20413 20505 20226 20580 21111 21046 21221 20681 22262 21905 22531 22086 22301 21890 21990 21800 22199 22080 22131 21760 21904 21865 22317 22145 21882 20619 20967 21105 21256 21015 21135 20930 21569 21093 21352 21632 22173 22104 22555 22021 22336 21783 22352 22000 22164 21738 22121 21901 22373 21488 21897 21825 21648 21077 21329 21080 21864 21153 21511 20925 21959 21256 22242 21643 22472 21952 22224 21485 22387 21706 22138 21464 22400 21736 22190 21397 22362 21615 22297 21121 22148 21365 21705 21264 22135 21548 21747 21456 22572 21681 22016 21680 22522 21530 22069 21673 22529 21479 22424 21559 22186 21441 22234 21533 22120 21489 22249 21531 22272 21701 22124 21454 22165 21665 22064 21553 22311 21395 22205 21483 22151 21399 22144 21541 22049 21415 22370 21425 22006 21544 22069 21382 22093 21600 21966 21633 22089 21476 22104 21608 22113 21440 22204 21405 22087 21655 22049 21410 22238 21482 21847 21687 22037 21391 22240 21495 22514 21570 21970 21616 22080 21435 22076 21465 22110 21488 22083 21655 22529 21721 21975 21490 22241 21425 21869 21864 21936 21543 22183 21556 21930 21696 21905 21790 21972 21381 22326 21472 21888 22039 21889 21425 22052 21576 22195 21614 21908 22132 21769 21457 22445 21477 22006 21726 21893 22019 21831 21647 22464 21418 21721 22119 21757 21729 21760 21736 22462 21579 21630 22160 21769 21804 21893 21771 21880 22010 21578 22247 21550 22144 21832 21838 22164 21875 21770 22147 21661 22205 21863 21729 22073 21868 21952 22097 21703 22219 21709 22153 21781 21936 21847 22210 21719 22181 21367 22328 21629 22101 21863 21793 21987 22011 21654 22147 21405 22164 21603 22096 21788 21843 21761 22136 21623 22372 21422 22296 21558 22050 21740 22088 21838 22172 21549 22336 21575 22343 21479 22051 21849 22018 21818 22265 21416 22421 21341 22407 21488 22311 21578 22075 21645 22118 21632 22279 21415 22320 21445 22248 21645 22007 21805 22201 21639 22351 21391 22446 21529 22179 21593 22170 21635 22326 21695 22361 21495 22125 21323 22350 21335 22413 21368 22033 21508 22069 21614 22189 21385 22218 21612 22238 21635 21985 21650 22110 21541 22061 21607 21999 21468 22291 21291 22318 21346 22163 21568 22141 21529 22189 21397 22281 21448 22363 21293 22293 21417 22063 21637 22060 21618 22030 21366 22212 21518 22147 21558 22065 21504 22000 21581 22097 21536 22088 21380 22184 21527 22068 21566 21969 21741 21982 21655 22024 21357 22265 21488 21939 21724 22132 21591 22199 21442 22323 21509 22128 21525 22024 21540 22133 21568 21799 21916 22129 21525 21901 21984 21933 21518 21708 21872 21954 21633 21948 21661 22276 21911 21897 21617 21943 21571 22244 21607 22048 21589 21724 21568 21895 21935 22421 21683 22384 21335 22490 21515 21777 21806 21898 21529 22356 21607 21702 22205 21781 21499 22362 21637 21776 22053 21959 21580 22194 21780 21865 22006 21728 21761 21665 22095 21805 22043 22100 21911 21911 21935 21959 21923 21773 22033 19978 20605 19856 20682 20228 20635 20667 20348 20738 20535 22148 22517 22360 22361 22165 22010 20770 20913 20833 21076 20657 21181 20595 21191 20656 22727 22019 22605 22034 22368 21833 21401 20903 21463 20944 21415 20897 21530 20781 21495 22167 22713 21731 22556 21748 22492 21196 21529 21340 21504 21296 21437 21321 21677 21097 21943 21682 22540 21789 22351 21959 21826 21600 21842 21419 22157 21205 22130 21609 21984 21621 22397 21439 22459 21809 22040 21684 22516 21500 22252 21809 22359 21412 22428 21812 22165 21419 22331 21737 22137 21708 22264 21717 22053 21488 22288 21829 22343 21428 21965 21550 22392 21797 22230 21337 22372 21436 22338 21531 22361 21441 22307 21429 21981 21291 22115 21452 22191 21657 22323 21558 22208 21392 22132 21587 21975 21411 22021 21481 22248 21421 22109 21365 22258 21283 22194 21452 22279 21504 22273 21485 22275 21593 22247 21436 22305 21501 22055 21565 22203 21544 22179 21578 22012 21403 22151 21489 22235 21475 21968 21536 22171 21591 22285 21764 22246 21527 21977 21576 22048 21447 22215 21347 22263 21548 22179 21545 22213 21504 22023 21452 21968 21580 22167 21720 
21669 21986 21646 21864 21642 21882 21606 21888 21559 21859 21551 21808 21590 21885 21370 21931 21441 21809 21575 21927 21651 21965 21607 21979 21587 21994 21667 22009 21594 21933 22053 21809 21437 21875 21631 21954 21754 21958 21656 21890 21581 21933 21525 21821 21569 21926 21655 22055 21694 21913 21472 21869 21536 21960 21560 21864 21527 21916 21524 21760 21560 21927 21645 21899 21577 21824 21516 21891 21677 21896 21595 21816 21501 21884 21500 21500 21818 21537 21736 21509 21978 21485 21912 21481 21921 21456 21889 21517 21668 21483 21943 21468 21888 21446 21976 21993 21878 21558 21818 21407 21851 21589 21864 21539 21956 21416 21829 21565 21783 21504 21825 21526 21869 21592 21944 21504 21850 21620 21753 21538 21904 21651 21918 21645 21984 21558 21897 21472 21861 21649 21664 21528 21915 21415 21783 21620 21719 21556 21930 21492 21709 21661 21537 21638 21972 21566 21816 21707 21833 21640 21868 21394 21989 21512 21856 21782 21624 21829 21760 21643 21765 21560 22049 21529 21897 21532 21761 21665 21775 21807 21688 21696 21649 21619 21968 21527 21915 21547 21783 21498 21684 21773 21632 21842 20612 20898 20619 20886 20736 20852 20864 20885 20951 22029 22067 22113 21912 22020 21817 21917 21930 21838 21813 21838 21729 21704 21771 21955 21704 21728 21719 21840 21731 21784 21448 21888 21800 21947 21700 21848 21619 21783 21617 21877 21639 22215 21516 21819 21676 21881 21517 21925 21681 21933 21733 21931 21682 21906 21702 21961 21694 22037 21633 21896 21654 21893 21593 21942 21604 21942 21556 21926 21580 21901 21499 21850 21485 21735 21432 21820 21479 21788 21573 21906 21607 21933 21569 22013 21680 21992 21607 21990 21307 21781 21568 22050 21532 21953 21523 21898 21454 21848 21367 21897 21633 21952 21589 21900 21512 21881 21655 21851 21524 21927 21499 21925 21488 21804 21745 21847 21536 21872 21464 21863 21451 21841 21595 21865 21554 21879 21528 21789 21679 21913 21536 21816 21394 21945 21540 21863 21456 21823 21672 21939 21604 21833 21528 21844 21532 21788 21449 21923 21525 21825 21529 21932 21547 21811 21504 21905 21577 21827 21561 21989 21608 21815 21400 21941 21639 21836 21688 21809 21585 21629 21674 21778 21515 21737 21640 21780 21436 21959 21620 21971 21861 21849 21486 21913 21664 21716 21516 22024 21568 21715 21735 20955 20777 21149 20851 21189 21147 21098 20883 21385 20951 22130 22069 22000 21750 22069 21855 21889 21761 21870 21783 21771 22013 21608 21941 21806 21778 21728 21820 21607 21913 21664 21800 21789 21674 21734 21857 20984 21720 21840 21654 21721 21728 21677 21792 21615 21843 21743 21581 21690 21806 21645 21888 21053 21874 21725 21719 21737 21801 21669 21899 21511 21937 21577 21945 21751 21750 21657 21817 21635 21929 21532 21939 21673 21847 21617 21824 21741 21928 21724 21797 21601 21923 21513 21975 21481 21984 21544 21936 21664 21767 21606 21851 21594 21888 21587 21991 21603 21933 21529 21927 21739 21828 21772 21640 21691 21835 21652 21956 21572 22075 21353 22025 21387 22052 21465 21990 21581 22039 21512 21927 21540 21902 21573 21874 21617 21870 21565 21936 21547 21829 21595 21899 21493 21924 21527 21989 21415 21994 21474 21904 21545 21831 21461 21802 21493 21835 21512 21853 21554 21845 21600 21898 21532 21949 21490 21882 21475 21883 21848 21881 21519 21934 21542 21925 21499 21908 21565 21820 21554 21842 21569 21831 21541 21783 21626 21901 21602 21837 21422 21859 21527 22017 21949 21864 21488 21890 21484 21895 21569 21822 21560 21620 21000 21383 21136 21318 21194 21319 21290 21454 21230 22072 21677 22039 21575 22115 21720 22037 21657 21953 21561 22032 21569 22019 21576 21704 21603 21799 21698 22357 21696 21824 21762 21668 21814 21712 21773 21812 21689 21792 21648 21821 21516 21780 21420 21792 21707 21879 21763 21952 21479 21943 21640 21852 21829 21705 21849 21771 21888 21551 21838 21795 21850 21601 21815 21726 21897 21632 21783 21693 21773 21683 21871 21849 21726 21797 21722 21821 21745 21848 21624 21825 21709 21778 21776 21741 21932 21692 21808 21687 21728 21667 21697 21608 21736 21636 21799 21689 21952 21703 21902 21594 22034 21521 21948 21604 21953 21473 21925 21600 21904 21613 21922 21585 21899 21593 21909 21685 21877 21728 21665 21644 21831 21627 21898 21613 22019 21446 22001 21597 21935 21568 21932 21657 21872 21588 21871 21612 22094 21485 21971 21697 21926 21495 21830 21597 21797 21685 21937 21589 21816 21518 21991 21542 22009 21688 21943 21596 22116 21369 21864 21496 22016 21600 21895 21491 22052 21632 21903 21504 21949 21468 21833 21733 21911 21626 21820 21531 21751 21453 21760 21451 21990 21524 21728 21506 21848 21369 21903 21447 21970 21495 21908 20993 21456 21157 21435 21173 21543 21316 21499 21153 21609 21819 22104 21680 21989 21585 21888 21658 22001 21787 21904 21585 21847 21574 21988 21522 21832 21553 21904 21548 21853 21656 21829 21515 21920 21614 21913 21527 21941 21504 21804 21533 21925 21552 21792 21547 21892 21659 21811 21605 21943 21549 21688 21609 21895 21416 21639 21661 21926 21579 21760 21640 21784 21716 21859 21095 21651 21579 21956 21814 21681 21507 21755 21578 21827 21814 22001 21774 21665 21484 21777 21478 21808 21569 21998 21802 22008 21755 21625 21431 21864 21594 21665 21515 21921 22005 21801 21784 21706 21906 21877 21840 21773 21908 21757 21773 21783 21953 21728 21815 21880 21863 21828 21664 21605 21736 21808 21652 21618 21761 21684 21838 21748 21818 21797 21846 21637 21877 21525 21869 21735 21927 21789 21879 21672 21872 21729 21848 21729 21936 21578 21944 21621 21893 21658 21916 21610 21773 21672 21938 21783 21804 21671 21824 21623 21930 21532 21966 21635 22000 21659 21888 21442 21917 21661 21992 21520 21845 21589 21975 21480 21796 21664 22004 21505 21800 21616 21975 21627 21737 21652 22023 21475 21784 21613 22060 21472 21895 21522 21917 21404 22004 21485 21583 21282 21728 21414 21937 21479 21768 21373 21793 21733 21939 21528 22012 21592 22057 21626 21961 21399 21948 21519 21965 21521 21981 21529 21803 21521 21963 21456 21966 21509 21751 21571 21815 21463 22005 21543 21834 21626 21933 21523 21914 21563 21747 21523 21911 21591 21938 21524 21815 21525 21741 21536 21843 21501 21879 21505 21783 21611 21934 21413 21863 21548 21776 21623 21824 21662 21847 21714 21987 21588 21672 21612 21732 21770 21922 21440 21975 21625 21798 21683 22027 21811 21794 21539 21774 21696 21942 21504 21755 21620 21849 21702 21737 21543 21881 21552 21924 21537 21751 21561 21856 21808 21824 21632 21747 21559 21888 21541 22096 21651 21529 21763 21776 21797 21669 21770 21856 21577 21688 21658 21635 21875 21671 21919 21560 21762 21608 21712 21844 21691 21837 21744 21833 22239 21777 21669 21714 21829 21587 21856 21589 21868 21600 21920 21635 21832 21645 21801 21752 21645 21720 21836 21701 21852 21748 21841 21610 21857 21610 21890 21675 22001 21620 22035 21495 22016 21428 21985 21402 21965 21540 21937 21577 21964 21624 21943 21584 21982 21655 21957 21680 21913 21632 21816 21654 21884 21632 21905 21682 21916 21685 21959 21659 21789 21721 21799 21697 21879 21715 21875 21603 21704 21600 22039 21670 21934 21584 21881 21603 21863 21595 21888 21574 21783 21619 21909 21650 21874 21592 21816 21653 21828 21709 21899 21582 21870 21575 21877 21594 21908 21568 21865 21541 21799 21591 21896 21543 21932 21605 21987 21621 21865 21616 21878 21633 21836 21591 21834 21616 21893 21565 21913 21718 21825 21651 21809 21637 21842 21564 21805 21627 21899 21650 21873 21648 21802 21638 21864 21608 21848 21651 21872 21548 21861 21632 21849 21603 21764 21600 21799 21604 21824 21665 21877 21508 21861 21506 21810 21551 21853 21408 21810 21440 21907 21660 21819 21623 21974 21594 21872 21591 22016 21513 21979 21428 22016 21628 21770 21587 21829 21693 21831 21765 21697 21682 21810 21499 21967 21536 21927 21527 21845 21813 21764 21479 21936 21569 21619 21618 21653 21464 21856 21944 21620 21749 21789 21746 21623 21817 21805 21671 21445 21817 21771 21824 21689 21756 21712 21747 21861 21846 21767 21686 21505 21732 21657 21797 21817 21815 21645 21817 21655 21896 21703 21846 21688 21805 21600 21829 21751 21888 21749 21805 21456 21864 21724 21947 21731 21796 21482 21854 21625 21934 21723 21952 21714 21847 21556 21845 21632 22016 21421 21796 21465 21699 21542 21861 21504 22011 21590 21902 21623 21927 21664 21958 21605 22057 21645 21982 21642 20943 20634 20888 20656 20749 20724 20967 20743 21163 22061 22341 21952 22171 21659 22180 21526 21984 21737 22053 21557 22088 21520 21914 21544 21920 21602 21003 20704 21179 20808 21308 20964 21243 21037 21280 20984 22214 21719 22265 21691 22072 21640 22033 21588 22124 21540 22071 21445 21970 21605 21952 21504 21868 20873 21241 21080 21429 21010 21448 21112 21450 21231 21575 21747 21977 21861 22065 21717 21974 21545 21979 21548 21945 21592 22003 21602 21925 21490 21923 21649 21409 21180 21552 21212 21590 21321 21577 21233 21716 21829 21972 21621 22089 21677 21895 21460 22040 21573 21697 21492 21911 21654 21824 21388 21926 21642 21728 21240 21751 21367 21552 21372 21865 21504 21719 21515 22140 21683 21958 21872 21984 21623 21721 21857 21888 21528 21674 21751 21777 21639 21911 21674 21657 21617 22076 21667 21634 21486 21741 21905 21607 21865 21824 21733 21680 21847 21649 21751 21849 21847 21578 21845 21852 21592 21792 21892 21645 21774 21817 21763 21701 21846 21589 21745 21704 21907 21527 21923 21649 21677 21722 21861 21557 21848 21756 21799 21631 21943 21664 21785 21725 21837 21650 21984 21600 21902 21669 21799 21572 21938 21655 21725 21709 21852 21601 21925 21568 21932 21745 21856 21662 21988 21768 21912 21696 21776 21637 21957 21395 21993 21501 21945 21647 21896 21616 22049 21489 21957 21592 21747 21671 21932 21543 21904 21553 21955 21663 21735 21623 22055 21384 21965 21529 21953 21569 22005 21616 21959 21577 21896 21446 21984 21516 21984 21579 21920 21497 21801 21568 21923 21520 21948 21548 21966 21506 21882 21451 21955 21483 21798 21607 21835 21527 21866 21298 21960 21488 21836 21504 21834 21621 21898 21400 21917 21481 22016 21568 21800 21532 21825 21654 21922 21645 21861 21521 21990 21527 21818 21623 21813 21648 21842 21510 21892 21488 21856 21515 22360 21589 21851 21519 21911 21639 21874 21580 21865 21581 21850 21570 21837 21568 21890 21559 21904 21560 21687 21639 21654 21700 21803 21600 21821 21660 21917 21508 21952 21647 21760 21798 21712 21735 21773 21509 21956 21501 22013 21613 21702 21675 21737 21827 21829 21432 21867 21526 21992 21550 21687 21685 21725 21786 21724 21556 21865 22051 21969 21540 21826 21660 21957 21766 21645 21697 21781 21556 21824 21820 21725 21837 21504 21844 21313 21760 21748 21809 21847 21793 21761 21760 21684 21866 21599 21808 21676 21853 21832 21680 21832 21715 21714 21808 21661 21884 21692 21881 21620 21858 21760 21735 21715 21776 21673 21923 21499 21897 21641 21782 21794 21729 21739 21786 21655 21897 21592 21910 21678 21816 21763 21765 21617 21878 21625 21923 21440 21977 21568 21929 21747 21669 21755 21880 21468 22006 21641 21750 21752 21927 21409 21930 21639 21869 21623 21921 21754 21928 21416 21991 21671 22057 21547 21799 21592 21997 21664 22073 21593 21921 21552 21844 21577 21925 21675 22084 21738 21888 21592 21806 21665 22037 21587 21760 21700 21925 21831 22088 21559 21876 21562 22011 21456 21874 21548 21878 21548 21912 21481 21928 21445 22016 21607 21796 21554 22023 21648 21932 21489 22006 21649 21933 21588 21936 21555 21852 21508 21949 20263 20877 20583 21109 20660 21076 20687 21072 20774 21157 21861 22309 21761 22073 21760 20997 20859 21233 20794 21229 20317 21434 21000 21313 20986 22314 21966 22117 21808 22022 21687 21317 21035 21371 21133 21512 21197 21543 21200 21593 21850 22256 21736 22145 21781 22027 21142 21569 21351 21504 21355 21585 21317 21561 21342 21740 21684 22177 21578 22035 21763 21648 21478 21732 21446 21848 21434 21792 21460 21755 21590 21932 21603 21929 21702 21845 21661 22033 21653 21828 21767 21644 21544 21844 21744 21635 21562 21784 21819 21703 21499 21851 21768 21667 21474 21809 21797 21896 21611 21696 21621 21961 21804 21776 21440 21641 21632 21778 21753 22016 21559 21633 21575 21737 21633 21796 21751 21989 21843 21984 21590 21543 21788 21760 21661 21843 21824 21808 21778 21831 21902 21680 21845 21761 21739 21705 21766 21690 21877 21736 21671 21721 21728 21780 21840 21699 21827 21738 21784 21775 21836 21793 21913 21862 21897 21797 21907 21607 21700 21655 21742 21441 21712 21635 21929 21741 21865 21749 21895 21840 21846 21629 21542 21513 21857 21635 21883 21689 21950 21609 21816 21763 21765 21695 21913 
34835 38183 34656 36853 34436 37147 34125 36875 33635 36801 33624 36007 33863 37272 41748 38005 42304 36515 33785 37617 34580 38116 34304 38284 33952 38351 34840 38604 34061 37728 38934 36354 42405 37408 34704 37786 35939 37980 34600 37016 33920 37736 33129 36469 33504 37515 34745 39002 35340 37447 42514 37455 33069 37789 33511 36790 33203 37384 32983 35373 33389 37620 34640 37304 33781 36191 32924 37019 35028 37108 34111 36230 43127 37577 43095 38770 34297 36772 42666 37005 32870 38088 32975 37224 32935 37664 42122 39045 33176 36933 42256 36240 34201 38310 33214 36784 33859 36377 34199 37913 33571 35692 37763 37491 33544 37716 43217 37158 33203 37912 34031 36617 37020 33863 37664 32612 36648 34215 35780 33095 37015 34542 37556 34624 38050 33580 37146 42515 37240 34478 34422 32897 37440 42176 36352 34212 35397 33333 37541 42871 35686 34765 33025 34198 37985 33784 36216 35332 36556 34312 36951 41703 38641 32881 36553 35974 34241 36461 35512 34484 35671 33400 38666 33225 37139 33193 35466 34578 35996 36480 34938 34848 34343 34184 37843 33235 37455 33488 35952 42948 35200 35926 34060 36513 33245 36342 33529 36307 34503 36000 35945 36417 37319 38817 39233 39717 37516 38496 36544 37646 37733 36822 36416 36768 35460 35085 35853 37943 35187 35299 35444 36470 35554 35888 42273 37219 36161 37994 35137 36647 34292 35996 34144 37083 34496 40724 33137 36416 34883 37172 33079 37488 34892 37771 35654 37760 34905 37209 35210 38007 35287 38720 34321 37079 34603 37149 33979 37736 34048 37728 33440 37497 33816 37316 43148 37121 43001 36042 42152 36752 42857 36352 33671 37156 34250 37732 33582 38689 34845 38276 34311 38310 41157 36195 33386 38665 33264 37728 33069 37122 42592 36980 41782 37512 34257 37641 33957 37200 32801 37072 34699 36818 32960 37585 43160 37926 42755 36544 35633 36840 33016 36770 42508 37352 42580 36883 34089 36920 33362 37157 33019 36037 35085 37433 33045 36177 41670 38120 33242 36933 42313 36994 34761 37728 34053 36505 32992 36500 33154 35921 42389 37853 33135 36264 33095 37568 33491 36224 32537 37100 33757 36400 33544 38272 34140 36405 41751 38071 34560 36566 34951 36177 33728 34418 34741 35748 32960 35476 34263 35766 42296 38359 34309 38041 37032 36855 42963 37767 34598 35193 32850 38328 33508 35205 35648 37327 35282 39376 36288 39781 39538 38950 36534 41673 37559 39851 39328 38488 35910 39144 37217 37104 35650 37138 36148 35925 38790 34152 37738 36439 35824 35304 36442 34205 37398 34560 36038 36165 34830 35513 36801 37719 35400 36460 34595 35354 35280 34933 35847 34394 36640 35925 33863 34930 36316 34552 36885 38556 37127 35636 35472 35600 36195 34771 37317 32985 37536 33776 37777 35985 35781 34603 36368 34306 37591 33206 37656 34896 36812 34188 36200 35793 37545 35543 36145 33930 37481 32920 38163 42905 38440 33318 37435 34567 35788 34065 36825 33966 36864 33863 38400 34140 37737 33175 37600 35815 36420 35863 34288 35072 36656 34471 37808 33619 39207 41612 38848 41943 39106 42764 38685 33996 38760 32889 37565 33209 37271 33708 36896 34192 37073 33734 37462 33485 36424 34055 37280 42992 37808 33246 38256 42226 38705 42717 37440 33384 36538 42560 36531 42949 37015 32804 36807 33348 36631 33840 37159 33184 37896 42850 37517 42784 37626 36689 37251 33191 37688 33331 37487 43160 37610 33781 36356 33336 36484 33520 36544 33261 35947 34352 37332 33986 36655 42226 37185 33175 38272 38045 36992 42700 37338 42893 37616 33589 36457 33437 34073 37420 41761 39207 41159 40044 41320 40960 42803 40656 39309 35142 38822 33936 39577 35464 38716 34748 37784 33629 38368 33604 38380 33709 34991 33992 36165 35014 42032 35175 36249 35607 34629 36311 35122 35910 36251 35046 35853 34281 36500 32921 35703 42080 36180 35321 37248 35744 37716 42935 38240 34402 36773 36576 35237 36772 35936 36945 33616 36632 36112 36816 33969 36396 35591 37251 34138 35991 35185 35920 34939 37225 36864 35623 36144 35426 36550 35666 36677 34284 36314 35360 35781 35680 35776 37671 35160 36077 35095 35271 34688 34949 33969 35429 34190 36197 35048 37684 35347 37380 33984 38499 32996 37783 34041 37750 42688 37911 33911 37056 34352 37386 33780 37269 33984 37319 35059 37113 35367 34605 34363 36576 34497 37191 34341 38426 42456 38733 34220 37849 33468 37581 34688 36865 33792 37161 34225 39434 43107 38467 35103 37575 43114 36858 34135 36069 34982 37603 33949 36231 33015 38362 33354 38531 35043 37873 34062 39511 41840 37163 42914 38567 33943 37229 42937 39136 34236 37440 32605 37872 42720 36900 35607 37504 34424 36396 33221 35780 42520 35799 42496 38661 33065 35232 32585 36540 41677 37769 42546 38333 43156 37613 37497 42339 39680 42551 39905 33561 40774 43351 39593 34315 36471 39480 34892 38331 33831 36848 34648 38385 36209 37157 33768 36762 33668 38165 32975 36352 33332 37027 33396 36832 34541 36476 33000 37216 34352 37379 33211 37689 32612 36100 33242 37477 33248 35786 33408 36968 34789 36268 34096 37840 33549 34801 34080 37224 41997 34740 34712 37545 33888 35399 34250 35817 35250 36868 38992 34661 33756 37764 36448 34848 32697 35808 33688 36401 36386 38463 36064 34616 42768 36106 42729 36408 33525 38471 36330 38551 36069 34384 42220 37165 33992 34515 32888 37330 38645 36337 35928 35207 37227 37219 36551 35979 37306 36054 35968 36064 37844 35397 36462 37120 37121 36482 34529 34010 35425 36068 34444 34055 35509 34844 36696 35713 36416 36181 36760 34368 37073 33051 37028 35735 37718 36240 37288 34768 36837 35461 36674 35457 37539 33772 37641 34381 37132 34662 37455 34199 35876 34694 37604 36136 36262 34885 36228 34433 37589 33208 38034 34387 38263 34829 36903 42221 37904 34864 38282 32871 36599 33896 38204 42765 36341 34529 38410 32768 35926 34041 38224 34582 35586 34416 38592 42816 36224 34310 38945 42602 37604 32964 37480 42000 38746 43089 34315 40419 35522 41964 37907 42935 36008 41810 36265 35603 37767 33088 38551 33943 38912 34501 37971 42007 38175 33248 38069 32976 38256 33204 36208 32884 38006 42380 38468 32936 35786 33595 36372 42692 38887 33511 36480 34379 37755 33077 37324 33712 35662 32966 37382 34040 37572 32994 36337 33045 35645 32947 36567 43142 37581 32737 35931 34242 37732 42102 37337 33424 35571 34405 36209 34772 36801 35233 38308 33869 34597 34110 35368 35765 37442 42169 38572 34490 36083 34948 38633 36460 36032 33200 35824 34877 37768 32625 35798 34183 36712 35191 35575 33324 37104 33259 37376 33164 35760 33522 36547 36137 36296 34084 35659 33577 36837 33288 39124 34666 33017 35564 35681 36144 34776 35744 36675 33753 34826 34551 34225 37031 34920 37683 33515 35483 33992 35020 36589 35176 36709 35564 36578 41170 36039 34776 35154 36503 33846 36598 33895 36953 33859 37260 34353 36421 34576 36153 35734 34538 35237 36592 35188 36805 35707 36596 34161 36727 34167 36981 34971 38402 34294 38635 43168 38592 42232 38533 42028 38457 33255 37559 33773 37976 34336 37852 33684 38281 34791 37926 34816 37413 34145 36232 34571 37187 34133 37176 34887 37448 35050 38042 34827 36112 35424 36244 35029 37223 35385 37045 34111 35037 33769 38727 34887 37760 33701 37110 34091 36976 34089 36864 33685 35975 34257 37352 34459 36928 33862 36232 34567 36372 35381 37346 33925 37060 33808 37063 33978 37222 33436 36896 33284 36150 33988 37056 33408 37578 34157 38268 34408 36936 34080 37081 34240 36559 34009 36500 34057 37113 33735 37383 35430 36378 34528 36160 34349 36529 33600 36259 34485 37299 34467 36967 34337 36136 34342 36817 34072 36614 34544 36840 33386 36826 34116 36721 34078 35539 33792 36162 33968 36193 34617 37104 32733 36804 32672 36070 33568 36849 41775 36480 42083 37653 34737 36487 34432 38119 34034 36812 34016 38172 32967 38214 42208 38544 34539 35718 33812 36432 35223 36616 35776 35001 34771 36167 43104 38616 33124 37592 33223 36593 36404 35652 42788 37869 33602 34137 34056 34476 42391 36973 37808 34260 35715 36153 35649 34391 36363 36376 34896 42275 36713 35952 36288 35048 35830 35088 35712 36936 36791 35898 34977 32600 35286 34573 36101 36427 36507 34572 36384 34681 37095 35320 36715 34962 36326 33840 36448 35911 36940 35832 36365 42274 37175 35522 37960 35634 36033 42760 37255 34425 37744 35607 37708 35296 36840 33390 36630 34107 38155 42321 36329 42604 35417 33214 36821 32557 38593 33990 37316 34473 37651 34576 37916 34172 38923 34690 38343 34488 37248 33696 36272 33738 34917 34633 37440 34919 39508 39324 42144 37998 40434 34936 40186 33257 38002 35720 38930 33617 39145 32919 37327 33254 37222 33976 37636 34403 39680 35657 40908 37501 40580 38393 40502 37745 40813 35704 41357 35412 39062 34435 38514 33877 39702 33314 39140 42497 38327 34202 37650 32617 36888 36298 40407 38695 42340 37905 42375 39172 42560 40774 34003 35671 38223 37056 39054 35515 38168 33413 38234 33458 37760 33901 38452 34048 37522 42849 37863 34504 41753 39942 33403 39917 34055 40967 33944 40110 35444 36532 38096 34432 39288 35139 37280 42501 38976 33806 34913 42736 37814 34657 36236 41719 37856 34488 35232 40250 36099 41709 33478 41564 37251 32600 35321 32930 39864 35126 37927 36983 38169 34528 35373 36777 36987 33030 34656 35842 35800 34437 37436 34890 34561 34075 39151 34880 34124 42807 36097 37281 34261 36931 36321 35598 34700 36809 34442 35840 36800 36904 33747 36643 36871 33864 35802 37080 34589 35884 36424 35732 35124 36706 33904 35544 35072 37337 33210 37451 34473 34913 35371 36928 33521 36584 35911 36268 34639 37867 34585 35952 35580 36736 34433 38059 33917 37309 34824 36224 33532 37560 34739 35520 35344 36816 33967 37527 33452 37588 35716 36683 34801 38219 35758 37353 34959 35651 34327 37913 41843 38712 43269 38192 34779 37097 34097 38707 42896 38288 33933 35648 34870 37651 33433 37044 33367 37821 34967 35668 34397 38981 41688 38448 33216 37706 33578 38474 34152 38016 33786 37054 42384 38404 33031 37990 33910 37264 43047 36525 33420 37445 32832 37764 33433 38072 32736 37068 42552 38234 43008 36489 34242 36628 33170 36871 40771 38131 42769 36931 32592 36435 34326 37185 41792 37879 42883 38581 33527 35986 33129 36263 34568 37400 34603 36883 32919 38243 33264 36309 34433 36299 34304 36518 32832 36949 42695 36983 33032 41872 34152 36840 33168 37396 34517 36940 33796 36896 33904 36703 33524 36636 33408 36934 33633 37041 33473 34965 34407 34512 34966 36288 33824 36482 34673 37556 32768 37570 34740 35439 36136 35111 35648 35936 32804 37723 43208 39109 34459 35081 34898 35569 36489 36560 42176 37381 33110 38196 33575 34979 34939 35527 35988 35467 33324 36885 38849 38168 33251 36256 34672 37899 35843 34539 34939 35904 33363 36164 36477 35596 36738 32552 36487 40928 35719 35660 36210 36867 36057 35610 35479 34833 36949 34236 36050 34863 36906 36522 34757 36423 35348 35182 36080 34768 37200 35123 37179 34246 36723 35520 35688 35309 35671 34804 37520 43151 37584 34472 35885 36004 35432 35715 36003 34663 37204 33865 37315 35028 36281 35720 35749 34138 37078 34408 37501 42144 38528 33513 37552 35824 34787 35898 37105 42674 38893 34535 35714 35722 37712 41955 37926 34560 37096 34456 37402 35915 37559 42032 38768 35021 38961 33564 36164 33817 38490 34622 39147 34082 37384 33268 36528 33728 37512 35002 39158 35777 36938 33856 36281 34626 38702 33954 35410 35018 37568 36684 39289 33750 36944 33578 38633 42400 37304 33411 37041 33408 37239 42840 37861 42443 38567 34328 35973 33312 38521 34391 37632 42848 38889 34504 37760 33843 37460 33498 36723 32713 37876 40534 36620 33253 38812 34016 38342 34602 38219 35265 39364 37092 41673 35861 39204 35637 37545 36416 40227 35633 40331 41431 42517 37811 40945 37880 41771 38439 39829 36292 38546 35211 40964 38368 41879 39472 32923 39815 33548 39586 34091 36725 41080 35757 39804 36130 38710 39320 33664 41392 32805 41403 33988 40916 33766 41306 35905 34864 40152 33918 38608 35829 34285 42624 35758 42325 36964 42304 36193 42424 36259 33888 37604 34129 37576 35225 36707 34802 38539 34684 36375 35879 34432 33108 36499 35556 34313 33448 35785 36524 35303 43036 37224 35765 34720 42489 36512 36201 37145 34296 34817 34245 37956 36341 35707 42087 34688 34021 35712 35840 38265 33709 34092 33665 35520 34165 35968 35907 38376 36818 38156 33968 33256 35925 35472 34745 36655 36313 36131 35814 36641 37436 34788 36699 35625 35725 35192 35712 35016 37120 35565 34864 35370 35292 35808 36488 35145 36480 35648 35888 36059 36640 36048 37474 37010 37309 36228 37388 34262 34961 34615 35728 42161 35388 34278 37592 35859 37002 35840 37312 36547 36776 34548 33224 32704 36658 34316 37251 35097 37984 34232 36241 35708 35730 35291 37441 
22729 22557 22807 22531 22824 22550 22892 22544 22822 22444 22752 22524 22849 22535 22891 22487 22864 22316 22716 22364 22604 22169 22686 22323 22804 22324 22865 22502 22891 22541 22908 22419 22784 22336 22580 22380 22640 22411 22829 22487 22871 22585 22816 22375 22903 22275 22747 22420 22904 22348 22884 22427 22785 22455 22775 22426 22875 22456 22823 22305 22717 22477 22772 22405 22804 22385 22761 22385 22739 22389 22730 22400 22756 22307 22739 22314 22765 22333 22857 22337 22692 22370 22737 22400 22800 22304 22656 22201 22847 22471 22678 22306 22735 22452 22688 22384 22784 22333 22572 22415 22800 22343 22700 22427 22669 22457 22659 22411 22631 22361 22763 22449 22652 22391 22632 22439 22676 22340 22328 22403 22791 22375 22752 22313 22847 22439 22708 22322 22634 22343 22663 22394 22559 22459 22793 22401 22521 22286 22743 22520 22615 22256 22869 22482 22516 22476 22961 22498 22629 22779 22348 22603 22763 22583 22481 22519 22573 22818 22322 22773 22321 22603 22520 22593 22698 22589 22560 22551 22498 22753 22455 22850 22536 22533 22611 22652 22754 22632 22679 22285 22869 22684 22792 20523 20939 21077 21189 21257 21397 21395 21335 21368 21504 23347 23118 23044 22948 22842 23074 22597 22900 22797 22816 22645 22852 22583 22651 22521 22858 22661 22823 22540 22827 22608 22758 22369 22597 22606 22863 22552 22795 22400 22747 22615 22871 22630 22786 22480 22790 22311 22718 22316 22690 22541 22762 22528 22773 22473 22855 22560 22853 22515 22951 22495 22841 22496 22947 22509 22906 22468 22929 22520 22857 22489 22912 22544 22898 22584 22811 22550 22817 22414 22811 22433 22626 22314 22656 22464 22770 22409 22964 22464 22888 22301 22785 22355 22759 22432 22862 22464 22877 22438 22751 22380 22549 22360 22820 22455 22752 22433 22810 22351 22880 22229 22845 22400 22964 22319 22840 22371 22669 22374 22824 22401 22798 22352 22659 22487 22796 22368 22715 22377 22687 22512 22739 22353 22752 22336 22804 22517 22714 22439 22766 22565 22792 22368 22698 22323 22756 22391 22683 22350 22777 22438 22639 22361 22810 22408 22745 22263 22853 22491 22637 22327 22807 22544 22667 22456 22684 22539 22602 22621 22627 22424 22464 22656 22722 22921 22757 22430 22501 22421 22749 22459 22458 22695 22633 22555 22816 22477 22683 22667 22670 22351 22720 21209 21355 21274 21688 21312 21492 21677 21511 21440 21888 23009 22893 23040 22904 22519 22780 22895 22555 22913 22664 22652 22758 22868 22528 22903 22560 22673 22600 22660 22550 22833 22657 22681 22680 22605 22659 22666 22504 22828 22532 22674 22648 22705 22610 22840 22438 22863 22437 22721 22628 22688 22563 22766 22465 22783 22949 22728 22616 22631 22580 22696 22427 22761 22368 22884 22447 22788 22521 22656 22516 22756 22535 22852 22440 22839 22456 22900 22390 22736 22517 22712 22487 23081 22534 22818 22432 22944 22215 22925 22370 22804 22389 22739 22493 22691 22507 22730 22419 22837 22279 22896 22508 22773 22380 22708 22416 22688 22482 22693 22485 22882 22496 22806 22320 22917 22299 22765 22455 22786 22296 22856 22315 22818 22404 22743 22385 22752 22337 22865 22449 22720 22460 22720 22433 22785 22456 22744 22184 22752 22320 22929 22376 22820 22345 22833 22387 22832 22353 22757 22413 22679 22324 22935 22476 22727 22415 22692 22448 22686 22535 22705 22466 22765 22394 22604 22415 22791 22408 22772 22419 22787 22332 22738 22432 22722 22450 22660 22481 23019 22432 22707 22393 22631 22553 22739 22348 22599 22311 22794 22249 22844 21255 21793 21526 21894 21666 21994 21795 21869 21696 22039 22990 22833 22872 22695 22761 22615 22741 22781 22656 22796 22474 22720 22362 22691 22913 22791 22417 22820 22353 22936 22467 22839 22537 22691 22582 22596 22476 22519 22509 22452 22593 23054 22608 22577 22644 22568 22759 22456 22673 22599 22695 22691 22318 22612 22603 22528 22635 22701 22709 22656 22673 22481 22631 22472 22763 22536 22644 22561 22733 22547 22773 22433 22624 22521 22735 22375 22781 22490 22852 21924 22730 22407 22682 22488 22741 22400 22739 22483 22759 22466 22746 22691 22725 22682 22543 22487 22589 22503 22551 22457 22491 22477 22709 22530 22755 22609 22745 22528 22717 22439 22743 22432 22833 22496 22785 22279 22827 22445 22871 22407 22827 22569 22725 22480 22511 22444 22771 22416 22825 22352 22897 22237 22893 22328 22850 22492 22624 22487 22218 22528 22726 22529 22951 22321 22898 22560 22875 22467 22816 22567 22531 22504 22855 22150 22928 22389 22736 22476 22726 22297 22868 22280 22697 22422 22745 22937 22885 22429 22727 22465 22839 22423 22651 22418 22663 22419 22883 22355 22793 22336 22695 22336 22773 22308 22807 22362 22855 22457 22743 22374 22698 22375 22086 21771 22152 21844 22269 21945 22265 21989 22385 22809 22928 22526 22848 22434 22853 22528 22810 22373 22703 22481 22714 22451 22749 22535 22679 22471 22677 22426 22784 22524 22668 22476 22758 22372 22617 22456 22807 22247 22689 22444 22721 22631 22637 22493 22817 22490 22599 22542 22811 22304 22740 22567 22697 22400 22720 22553 22756 22412 22607 22467 22830 22464 22864 22313 22648 22633 22816 22417 22630 22466 22633 22648 22759 22506 22425 22199 22468 22375 22610 22475 22702 22698 22855 22377 22506 22520 22520 22400 22640 22509 22508 22564 22756 22511 22536 22639 22448 22631 22519 22617 22455 22656 22295 22681 22427 22704 22404 22576 22697 22788 22618 22710 22643 22760 22699 22722 22551 22528 22515 22671 22455 22672 22452 22791 22593 22859 22549 22709 22689 22592 22450 22711 22630 22807 22385 22677 22302 22749 22605 22824 22560 22696 22376 22768 22482 22851 22432 22599 22436 22835 22567 22807 22373 22664 22561 22802 22453 22548 22386 22871 22483 22702 22306 22796 22442 22933 22319 22776 22425 22871 22347 22632 22505 22903 22381 22608 22413 22902 22400 22616 22407 22855 22460 22611 22457 22895 22402 22810 22386 22716 22309 22451 22021 22456 22108 22609 22090 22477 22148 22561 22180 22841 22541 22770 22432 22835 22373 22597 22405 22839 22480 22849 22314 22760 22364 22755 22265 22855 22379 22646 22356 22741 22351 22621 22452 22632 22343 22733 22438 22599 22464 22704 22336 22771 22369 22729 22417 22628 22459 22688 22486 22705 22480 22672 22428 22743 22343 22754 22302 22733 22404 22668 22496 22691 22398 22759 22432 22421 22541 22631 22393 22610 22476 22743 22407 22497 22560 22619 22644 22588 22290 22797 22471 22696 22423 22414 22683 22663 22531 22594 22973 22839 22441 22545 22453 22528 22692 22505 22545 22608 22352 22770 22412 22727 22433 22592 22575 22504 22797 22647 22348 22711 22640 22489 22631 22456 22839 22419 22652 22433 22764 22553 22785 22582 22848 22577 22577 22582 22796 22479 22737 22388 22750 22438 22663 22455 22639 22563 22544 22585 22529 22616 22716 22464 22784 22528 22837 22419 22834 22386 22719 22471 22805 22357 22753 22403 22698 22528 22704 22555 22665 22484 22541 22503 22592 22577 23205 22568 22705 22473 22738 22464 22823 22446 22852 22416 22843 22312 22866 22252 22868 22257 22884 22168 22870 22266 22841 22148 22848 22208 22874 22221 22848 22295 22801 22435 22927 22183 22925 22336 22849 22464 22820 22337 22792 22359 22832 22467 22874 22275 22769 22363 22857 22360 22765 22349 22490 22400 22723 22402 22702 22310 22688 22378 22584 22471 22735 22321 22764 22349 22666 22343 22774 22406 22768 22397 22711 22279 22729 22266 22782 22348 22688 22347 22778 22329 22737 22476 22665 22347 22697 22341 22668 22359 22639 22417 22544 22472 22711 22349 22730 22453 22600 22439 22750 22305 22714 22429 22622 22427 22666 22413 22666 22378 22717 22443 22616 22461 22733 22389 22609 22457 22542 22444 22562 22485 22587 22443 22682 22517 22822 22490 22387 22631 22567 22519 22572 22599 22551 22562 22573 22748 22580 22635 22593 22629 22639 22370 22553 22569 22802 22357 22736 22433 22694 22478 22525 22566 22455 22685 22655 22409 22823 22445 22413 22487 22548 22615 22552 22372 22826 22508 22440 22555 22661 22630 22246 22697 22656 23172 22419 22843 22512 22685 22307 22648 22638 22855 22604 22588 22388 22678 22587 22720 22748 22668 22446 22471 22439 22702 22661 22767 22567 22680 22336 22730 22476 22730 22615 22675 22411 22692 22474 22759 22573 22742 22336 22617 22412 22804 22619 22835 22358 22616 22389 22725 22440 22855 22601 22802 22491 22837 22511 22872 22473 22728 22380 22699 22326 22712 22374 22733 22379 22467 22403 22725 22224 22619 22339 22845 22470 20986 20885 21379 21107 21491 21139 21534 21132 21800 21125 23445 22901 23185 22800 23173 22685 23069 22405 22893 22340 22909 22504 22803 22467 22833 22453 22618 21132 21527 21241 21649 21404 21749 21427 21860 21509 21875 22912 23030 22564 23073 22580 23008 22421 22799 22486 22887 22500 22882 22372 23406 22486 22836 22416 21788 21425 21804 21719 22027 21736 22067 21639 22114 22998 23104 22653 22984 22606 22885 22549 22692 22354 22848 22503 22759 22420 22727 22504 22730 22444 22637 21773 22144 21828 22224 21912 22385 21962 22196 21904 23141 22669 22830 22452 22930 22557 22711 22321 22763 22584 22640 22297 22774 22488 22567 22332 22761 22083 22231 22167 22509 22228 22261 22188 22559 22217 21884 22841 22880 22574 22663 22750 22717 22354 22625 22664 22593 22419 22512 22640 22602 22589 22759 22400 22576 22329 22868 22528 22549 22428 22593 22604 22471 22750 22544 22638 22440 22733 22747 22759 22577 22590 22501 22666 22409 22528 22669 22586 22376 22678 22668 22769 22521 22668 22448 22732 22547 22614 22450 22774 22511 22717 22429 22631 22312 22813 22602 22584 22616 22794 22228 22794 22536 22769 22516 22830 22183 22844 22471 22733 22492 22771 22787 22749 22547 22844 22446 22868 22259 22830 22482 22599 22514 22793 22313 22887 22375 22816 22475 22747 22375 22893 22303 22849 22362 22691 22434 22770 22369 22788 22450 22816 22541 22746 22397 22913 22311 22774 22481 22773 22503 22785 22409 22861 22279 22934 22272 22760 22354 22720 22405 22779 22548 22754 22459 22684 22381 22685 22430 22755 22445 22769 22384 22656 22318 22824 22373 22805 22252 22792 22292 22817 22376 22727 22445 22672 22276 22746 22382 22727 22345 22649 22428 22652 22417 22727 22348 22818 22276 22777 22367 22724 22419 22640 22464 22639 22444 22730 22376 22729 22389 22612 22407 22666 22421 22788 22346 22729 22328 22721 22430 22497 22428 22741 22468 22747 22202 22740 22392 22647 22408 22726 22501 22723 22422 22656 22680 22789 22392 22703 22429 22600 22532 22496 22656 22748 22298 22710 22352 22838 22509 22502 22449 22573 22656 22656 22300 22702 22425 22813 22486 22436 22473 22609 22683 22545 22472 22647 22313 22871 22549 22487 22406 21965 22683 22620 22645 22552 22715 22869 22407 22727 22511 22519 22615 22461 22416 22708 22504 22647 22609 22533 22674 22404 22762 22350 22789 22548 22656 22680 22547 22528 22649 22468 22687 22368 22763 22503 22650 22517 22599 22617 22563 22657 22649 22497 22765 22356 22769 22458 22796 22531 22622 22509 22635 22532 22725 22343 22835 22369 22676 22615 22646 22551 23286 22587 22738 22406 22802 22441 22731 22497 22658 22510 22677 22434 22848 22365 22767 22468 22780 22541 22708 22528 22801 22101 22709 22513 22719 22359 22677 22446 22787 22225 22786 22497 22778 22212 22754 22544 22889 22354 22772 22304 22753 22507 22919 22457 22888 22530 22788 22453 22685 22436 22668 22471 22604 22528 22757 22408 22740 22533 22769 22356 22840 22377 22762 22442 22763 22307 22833 22336 22777 22425 22735 22313 22790 22552 22736 22421 22660 22369 22812 22396 22683 22358 22744 22524 22720 22429 22763 22413 22769 22306 22769 22217 21032 21058 21431 20939 21427 21052 21527 21115 21607 22983 23329 22791 23108 22613 23032 21092 21649 21441 21792 21393 21846 21572 21888 21541 21916 22885 23165 22666 22957 22564 21747 21688 21980 21781 22071 21840 22208 21788 22183 21855 23276 22715 23023 22629 22858 22505 22157 21987 22189 21960 22236 22046 22327 22088 22380 22743 23026 22645 22856 22529 22744 22205 22365 22221 22552 22133 22528 22199 22560 22503 22390 22615 22870 22431 22681 22615 22816 22432 22683 22681 22703 22550 22808 22493 22564 22503 22753 22439 22609 22471 22805 22615 22539 22519 22715 22689 22559 22347 22609 22616 22836 22337 22629 22400 22569 22589 22862 22636 22471 22345 22470 22418 22556 22597 22764 22624 22618 22288 22944 22355 22528 22861 22640 22698 22557 22676 22453 22666 22410 22666 22382 22583 22356 22535 22311 22585 22516 22533 22452 22621 22417 22600 22509 22592 22312 22584 22469 22421 22382 22593 22447 22685 22506 22743 22520 22795 22648 22799 22553 22801 22567 22703 22425 22688 22575 22551 22414 22732 22604 22796 22482 22770 22575 22752 22452 22412 22304 22758 22456 22816 22503 22785 22440 22887 22389 
22510 22016 22746 22368 22753 22233 22889 22343 22893 22474 22851 22702 22796 22450 22528 22238 22304 22177 22442 21942 22510 22051 22521 21953 22164 22141 22724 22648 22878 22515 22446 21942 22359 22071 22393 22103 22216 21818 22567 22433 23028 22630 22336 22095 22224 22042 22176 22236 22714 22877 22711 22121 22326 21974 22650 21874 22618 22533 22990 22016 22135 21899 22561 21868 22172 22272 22549 22580 22199 22594 21930 22657 22121 22864 22455 22514 21929 22260 22325 22768 22371 22419 22182 22316 22328 22644 22443 22437 21898 22447 22523 22592 22209 22327 22049 22636 22397 22706 21927 22375 22191 22852 22200 22536 21915 22469 22160 22874 22240 22471 22160 22842 22326 22553 21972 22497 22217 22792 22033 22249 22072 22881 22231 22629 21790 22696 22277 22832 21984 22557 22342 22788 21888 22510 22178 22848 21998 22456 21912 22930 22212 22091 21770 23013 22175 22655 21795 22839 22116 22693 21691 22926 22123 22648 21725 23027 22129 22546 21877 22915 22258 22547 21853 22999 22162 22572 21964 22930 22109 22384 22039 22900 21980 22657 22138 22888 21779 22908 21831 22659 21924 22784 21854 22695 22049 22729 19951 18631 19586 18818 19789 18952 19972 22640 23369 22564 23049 22506 23072 22272 22906 22215 22776 22368 22967 22179 22972 22249 22809 22011 22614 21979 22808 22358 22519 22025 22348 22120 22681 22061 22560 22069 22647 22231 22563 22018 22656 21962 22317 22007 22584 21860 22281 21825 22418 21945 22328 21955 22508 22317 22529 22302 22538 22387 22552 22473 22636 22505 22593 22350 22701 22384 22764 22453 22806 22530 22499 22187 22336 22109 21993 21984 22216 22016 22286 22058 22251 21788 22301 22541 22929 22510 22364 21911 22151 21911 22132 22101 22199 22389 22787 22547 22160 22557 22176 22690 21777 22257 22127 22892 22208 22827 21993 22471 21840 22347 22279 22715 22492 22426 22048 22036 22231 22657 22464 22638 22253 22196 21998 22693 22353 22770 22041 22247 22056 22756 22377 22641 21778 22560 22320 22575 22061 22423 22152 22675 22068 22405 21832 22967 22192 22586 21763 22720 22263 22583 21895 22816 22106 22491 21888 22889 22218 21831 21853 22822 21982 22443 22013 22986 21937 22595 22177 22826 21544 22750 22016 22739 21815 23017 22059 22503 21992 22709 21718 22629 22231 22456 21851 22810 22072 22533 22117 22741 21577 19990 19489 20009 19641 20253 19396 20684 19580 20361 22777 23156 22546 23366 22331 23101 22488 22936 22171 22981 22208 22505 22308 22931 22007 22983 21906 22736 21897 22626 21989 22711 21824 22754 21920 22685 22019 22555 21882 22860 22061 22475 22005 22537 22150 22486 22096 22768 21880 22442 22117 22794 22198 22641 22039 22705 22064 22624 21857 22465 22177 22504 22112 22586 21824 22640 21958 22631 22135 22437 22158 22423 21973 22455 21908 22579 21140 22801 21962 22481 22144 22105 22407 22440 22348 22576 21838 22261 22027 22724 22109 22583 21996 22144 22309 22357 22617 22239 22178 22260 21978 22809 22057 22707 21984 22671 22071 22190 22344 22313 22646 22165 22603 22178 22112 22361 22042 22587 22120 22949 22022 22621 22010 22292 22102 22177 22311 22157 22400 22124 22456 22029 22588 22321 22497 22244 22327 22329 22521 22408 22416 22260 22411 22353 22580 22083 22540 22131 22657 21942 22711 22104 22717 22228 22769 22016 22727 21962 22491 22256 22343 22249 22414 22253 22415 22177 22429 22236 22464 22167 22609 21978 22744 21989 22902 21830 22763 21824 22794 21967 22653 22077 22647 22217 22647 22293 22285 22233 22813 22247 22576 22205 20552 20007 20823 20041 21014 20044 21288 19989 21362 20442 23488 22326 23260 22288 23144 22327 22873 22328 22761 22387 22528 22328 22466 22378 22656 22393 22748 22122 22771 21957 23061 21895 22900 21813 22871 21580 22980 21840 23060 21841 23087 21935 22840 21884 22681 21831 22743 21845 22869 21962 22681 22037 22552 21890 22432 22183 22380 22074 22698 21879 22684 22002 22691 21920 22651 21995 22674 21856 22767 21783 22630 21877 22618 21814 22759 22230 22826 21947 22725 21989 22749 21968 22721 22053 22568 21969 22519 21972 22688 22074 22523 22002 22528 21979 22579 22148 22440 21984 22449 22100 22633 22152 22629 21967 22631 22085 22550 22125 22473 22022 22476 21971 22572 21849 22464 22090 22595 21984 22881 22128 22627 21967 22133 22184 22613 22486 22370 22305 22476 21838 22445 22372 22809 22119 22404 22028 22303 22604 22181 22580 22252 22099 22258 21917 22778 22189 22784 21856 22283 22124 21946 22617 22167 22123 22817 22157 22264 22721 22311 22048 22860 22176 22310 22521 22360 21928 22251 22678 22177 22181 21788 22430 22347 22563 21998 22429 22258 22748 22275 22685 22161 22677 22328 22713 22467 22518 22200 22262 22208 22482 22405 22600 20594 21184 21090 21424 20903 21326 21255 21736 21044 22962 22725 23106 22089 22725 22484 22740 21959 22919 22438 22432 22348 22878 22077 22842 22487 22536 22016 22809 21973 22455 22247 22814 21897 22707 22336 22762 21741 22734 22385 22697 21878 22631 22148 22689 21825 22679 22176 22766 21725 22770 22176 22773 21979 22838 22273 22772 21740 22759 22093 23058 21846 22377 22032 22801 22165 22567 21782 22578 22256 23001 22324 22535 21796 22364 21933 22627 22144 22955 22088 22952 21991 22758 21760 22457 21884 22547 22000 22672 21900 22823 22164 22823 22026 22717 22102 22621 21917 22519 21917 22611 21753 22746 21910 22832 21936 22606 21829 22576 21898 22752 22025 22790 22007 22845 21949 22557 21911 22616 22038 22572 21852 22537 21905 22551 22068 22610 22013 22464 21917 22732 21968 22665 22176 22600 21948 22582 22176 22575 22164 22618 22060 22437 22066 22497 22072 22739 21839 22538 21920 22481 22285 22397 21907 22252 22336 22737 21992 22424 21909 22511 22137 22431 22055 22401 22423 22347 22084 22304 22322 22528 22003 22403 22327 22609 21946 22135 22144 22834 21906 22177 22227 22693 22039 22273 22688 22310 21991 22074 22577 22204 22256 21866 21760 21590 21461 22301 21504 21544 21857 21988 22255 21949 22978 22481 22528 22267 22905 21755 22588 22274 22494 22119 22648 22257 22256 22498 22400 21884 22730 22333 22293 22370 22758 21977 22709 22275 22459 22111 22813 21918 22752 22436 22451 22249 22823 21936 22823 22230 22408 22352 22450 21956 22793 21914 22685 22160 22671 22192 22789 21687 22741 22089 22301 22307 22560 21893 22828 21912 22705 22172 22351 22214 22579 21787 22831 21703 22855 22017 22563 22086 22673 22076 22864 21773 22960 22038 22732 22152 22279 22272 22652 21947 22804 21789 22836 21914 22615 22149 22464 21863 22693 22028 22824 21749 22686 21962 22843 21908 22662 22016 22688 22146 22685 22050 22474 21970 22451 22007 22875 21846 22844 21864 22631 22181 22653 22009 22766 21895 22614 21805 22692 21810 22869 21895 22712 22026 22613 21955 22485 22010 22604 22062 22457 22061 22537 22093 22471 21862 22449 22103 22656 21903 22705 21998 22576 21909 22570 21994 22413 21997 22395 22084 22665 22092 22636 22168 22371 22309 22592 22016 22359 22153 22349 21975 22384 21852 22471 21896 22528 21851 22471 22032 22808 22115 22733 21984 22619 22032 22774 22251 22615 22295 22759 21888 23035 22208 22851 21941 22931 22033 22853 21927 22840 22056 22881 21937 22513 22064 22392 22037 22346 22013 22063 22198 22033 22190 22150 22143 22029 22245 22064 22472 21896 22481 21979 22761 21959 22840 22009 22998 21882 22842 21885 22772 21916 22701 22084 22832 21937 22743 22016 22613 21989 22704 21912 22630 21959 22754 21893 22737 21892 22855 21851 22851 21797 22966 21874 22872 21841 22754 21992 22755 21860 22894 21845 22784 21698 23006 21787 22880 21677 22972 21716 22824 21645 22863 21799 22893 21668 22791 21741 22749 21739 22963 22021 22932 22460 23014 22388 22937 21913 22935 21863 23047 21960 22806 21981 22813 21964 22714 21972 22714 22167 22514 22111 22532 22024 22333 22272 22638 22202 22769 21799 22903 21633 22981 22303 22903 21685 22656 21786 22529 21968 22552 21638 22921 21868 22539 22019 22499 22053 22618 21814 22596 22183 22409 21921 22902 21830 22553 21652 22974 21754 22612 21604 22676 22003 22727 22027 22528 21972 22432 21823 22774 21911 22557 21895 22555 21817 22627 22289 22608 22001 22523 22023 22455 22226 22733 21996 22407 21967 22552 22166 22681 22013 22556 22082 22405 22033 22600 21945 22437 21998 22610 22088 22523 21888 22579 22184 22775 22236 22704 22076 22555 22048 22285 22132 22409 21970 22380 22067 22423 21899 22332 22037 22339 22081 22318 22202 22070 21805 19029 19101 19564 19626 19746 19207 19511 19223 19489 19467 22935 22680 23345 23377 23375 22571 22734 22486 22584 22565 22581 22900 23287 22493 22504 22308 22447 19537 19978 20143 20229 20520 20226 20448 20015 20318 23030 23452 23187 23287 22464 23006 22912 23184 22738 22832 22321 22841 22678 22983 22528 22487 22457 22950 20581 20857 20432 20809 20673 21227 20686 21547 20533 23207 22906 23414 22512 22909 22704 23140 22825 22749 22284 23056 22484 22936 21975 22833 22369 22997 20661 21278 21015 21749 20921 21462 21164 21927 21111 21432 22487 23415 22437 22719 22225 23228 22304 22937 22235 23138 22284 22612 22089 23128 22178 22766 21991 22357 21488 21877 21696 22460 21650 22092 21586 22467 21605 22685 22388 23170 22139 22685 22284 23050 22024 22919 22071 22877 21671 22934 21944 22805 21928 22964 21933 22701 22144 22669 22137 22481 22349 22551 21957 23023 21757 22792 22076 22694 21745 22755 22039 22828 21740 22977 21847 22672 22031 22580 22413 22799 21928 22577 22098 22731 21982 22648 22073 22676 21947 22743 21955 22579 22327 22455 21968 22604 22004 22538 22192 22519 21992 22688 21939 22615 22053 22601 22125 22577 22023 22593 22043 22717 22039 22509 22165 22411 22134 22587 21819 22657 22096 22445 22560 22352 21979 23033 21997 22236 22457 22434 22226 22406 22227 22551 22126 22370 22723 22352 21846 22981 22084 22477 22115 22428 22515 22265 21868 22817 22176 22185 22681 22092 22208 22453 22119 22775 22029 22483 22752 22301 22156 22642 22074 22765 22119 22072 22848 22469 22097 22391 22429 22223 22648 22001 22817 22151 22497 22286 22189 22517 22473 21942 22641 22019 22505 22485 22112 22557 22400 22112 22643 21938 22853 22155 22481 22292 22279 22336 22637 22083 22800 21591 22843 21995 22605 22241 22715 22320 22421 22043 22885 21692 22801 22169 22420 22362 22695 22034 22891 21907 22835 22110 22633 22135 22456 22368 22601 22117 22778 21712 23035 22092 22495 22257 22384 22289 22710 22111 22820 21741 22859 21789 22944 21975 22679 22182 22805 22101 22912 21783 22945 21723 22839 22075 22548 22230 22517 22347 22687 22035 22759 21976 22804 22099 22532 22105 22411 22192 22725 21925 22881 21864 22918 21688 22890 21781 22673 21920 22570 22042 22659 21861 22510 21867 22759 21913 22707 21858 22564 22035 22581 22035 22616 21779 22759 21804 22846 21795 22745 21829 22560 21906 22625 21871 22585 21885 22775 21869 22753 21859 22614 21905 22621 21984 22619 21875 22459 21783 22726 21976 22616 22044 22586 22260 22444 22144 22443 22008 22667 21952 22640 21924 22356 22133 22398 22194 22359 21918 22617 21988 22677 21853 22671 22137 22349 22039 22487 22205 22672 21984 22204 22284 22519 21989 22608 21986 22296 22477 22351 22338 22501 22423 22466 22165 22308 22499 22357 21996 22176 22570 22433 22112 22532 21861 22347 22290 22698 22521 22877 22545 22802 22539 22273 21979 22917 21858 22397 22700 22505 22126 22246 22651 22385 22011 22791 22137 22203 22508 22386 22122 22588 22051 22520 22205 22273 22475 22188 21962 22849 22083 22135 22528 22297 22100 22299 22515 22501 22364 22421 22772 22232 22497 22248 22577 22193 22517 18844 19493 18684 19791 19139 19777 19569 19387 19858 23431 22976 23355 22802 23111 22976 19832 20263 20728 20377 20679 20167 20845 20138 20769 23040 23841 22364 23708 22753 23362 20519 21378 20615 21526 21221 21360 20611 21569 20576 21619 22717 23466 22603 23467 22615 21744 21373 21763 21601 21741 21363 21927 21367 22101 21237 23664 22535 23264 22797 23105 22688 22375 21699 22471 21766 22668 21808 22359 21952 22286 22372 23236 22263 22992 22481 22908 22208 23232 22327 22791 22187 23169 22151 22907 22311 23179 21981 22539 22256 23096 22143 22487 22373 23122 22163 22583 22161 22961 22407 22954 21895 22789 22184 23013 22372 22898 21872 22688 22018 22634 21952 22876 22204 22768 22000 22825 22035 22718 21931 22625 21970 22620 22149 22893 22288 22550 22208 22785 21994 22656 21716 22705 21942 22971 21816 22708 21889 22656 21832 22564 21864 22718 21911 22589 21949 22677 21799 22606 22548 22626 22006 22528 21954 22713 22101 22788 22055 22768 22160 22542 22167 22436 21911 22608 21985 22633 21974 22448 22105 22599 22306 22587 22041 22513 21936 22470 22154 22609 22187 22731 22038 22604 21972 22443 22135 
