# Supplementary material for: An Active Feature Selection Strategy for DWT in Artificial Taste
Source: Hindawi journal article supplement (doi:10.1155/2018/9709505), 2018-01-01
Supplement: f1 [file 9709505.f1.zip › spirit-low-1.txt]

31465 29432 29160 28455 16999 19047 20431 20729 21778 21693 22218 21946 22705 22257 22867 22317 23171 22464 23296 22449 23412 22583 23479 22615 23457 22666 23581 22649 23555 22611 23636 22775 23477 22731 23744 22756 23713 22773 23744 22222 23773 22960 23779 22790 23574 22800 23768 22861 23520 22888 23595 22992 23609 23083 23653 23073 23505 23159 23592 23053 23497 23001 23618 22807 23537 22930 23713 22780 23744 22983 23741 22848 23712 22944 23464 22543 23481 22700 23333 22811 23362 22831 23328 22792 23355 22804 23439 22539 23504 22772 23478 22821 23432 22840 23323 22864 22966 23050 23264 22940 23383 22869 23408 22871 23348 22893 23443 22906 23633 22796 23539 22864 23364 22943 23439 22886 23333 23110 23281 23040 23312 23127 23297 22999 23216 22877 23416 22871 23623 22845 23545 22988 23217 22982 23258 23355 23228 23264 23495 22717 23469 22987 23496 23088 23333 23024 23097 23107 23383 23400 23143 23094 23104 23022 23591 22878 23538 23001 23152 23436 23277 23079 23376 23424 23602 23079 23023 23291 23188 23346 23239 23047 23607 23008 23008 23426 23159 23312 23256 23523 23601 22998 23133 23488 19934 21612 21981 22007 21768 22264 21812 22519 22109 22400 25673 23928 23493 23896 23073 23772 23366 23505 23411 23408 23281 23507 23027 23576 23207 23469 23314 23412 23310 23522 23042 23696 23132 23590 23148 23371 23244 23389 23200 23508 23001 23648 22887 23633 23013 23560 23259 23296 23291 23381 23098 23488 23117 23671 22793 23822 23019 23715 22921 23689 23068 23296 23173 23329 23241 23505 23014 23607 22971 23793 22738 23766 22935 23717 22901 23653 23040 23632 22992 23575 23046 23537 23076 23451 23003 23453 23049 23552 23086 23581 22984 23585 22920 23580 23008 23620 23047 23671 22929 23761 22940 23837 22874 23776 22857 23783 22740 23848 22688 23865 22884 23602 22779 23608 22863 23672 22896 23559 22916 23649 22899 23456 22732 23483 22871 23456 22949 23389 22942 23552 22880 23445 22913 23574 22956 23559 22848 23568 22964 23548 22885 23593 22928 23494 23088 23465 22934 23488 22864 23576 22966 23232 23067 23272 22869 23436 22959 23456 22849 23592 22888 23499 22973 23569 22856 23543 22920 23532 22903 23558 22860 23426 22920 23485 22842 23352 22989 23415 23073 23340 22956 23351 23092 23406 23089 23373 23040 23340 23031 23425 22950 23521 22272 22888 22372 23224 22489 22755 22048 22530 22380 24417 23722 23662 23636 23464 23390 23354 23229 23349 23157 23681 23078 23680 23352 23570 22981 23280 23057 23308 23463 23107 23450 23313 23176 23220 22976 23592 23026 23744 23106 23282 22967 23106 23351 23268 23537 23008 23143 23100 23076 23437 23015 23757 22921 23612 23061 23296 23017 23464 23063 23236 23404 23121 23601 22876 23654 22923 23545 23052 23544 23060 23468 23092 23193 23266 23156 23338 23331 23110 23498 22919 23528 22981 23493 23031 23457 23252 23367 23383 23303 23301 23415 23095 23513 23027 23591 22848 23750 22840 23525 23073 23431 23088 23430 23255 23250 23222 23507 22864 23651 23072 23670 22821 23669 22976 23518 23118 23571 23171 23319 23104 23607 22919 23721 22861 23692 22789 23534 23072 23489 23175 23520 23082 23461 22999 23628 22852 23703 22877 23765 22759 23750 22942 23577 23078 23680 23079 23396 22942 23716 22856 23788 22930 23831 22792 23680 23020 23504 23062 23369 23008 23520 22924 23557 22871 23724 22633 23811 22900 23515 23029 23367 23080 23507 22784 23713 22775 23644 22775 23582 22945 23499 22962 23477 22743 23406 22791 23646 22758 23627 22809 23448 22620 23102 22724 23287 22645 23417 22464 23303 22528 23476 23006 23781 22918 23670 22869 23548 22931 23626 22869 23577 22758 23624 22825 23729 22832 23576 23074 23586 22842 23514 22967 23399 23045 23424 23079 23431 22969 23379 22990 23462 22908 23561 22997 23442 22831 23420 22934 23342 23023 23473 23046 23412 23005 23143 22959 23349 22970 23347 22976 23512 22954 23480 22955 23593 23002 23505 22767 23418 22919 23335 23179 23308 23246 23388 23336 23164 23114 23289 23120 23093 22977 23159 23113 23377 22977 23425 23015 23554 22961 23682 22897 23637 22895 23596 22983 23397 22969 23303 23044 23386 23318 23108 23383 23258 22848 23711 22996 23113 23224 23082 23207 23275 22979 23536 23346 23115 23148 23308 23417 22920 23604 23308 23348 22632 23460 23144 23654 23054 23097 22935 23188 23164 23479 23223 23491 23301 23499 23360 23541 23170 23486 23104 23543 23233 23541 23204 23577 23189 23527 23137 23574 22944 23281 23010 23444 23267 23655 23032 23388 22888 23694 23236 23492 22723 23446 23140 23596 22841 23555 23125 23680 22985 23304 22802 23598 23125 23668 22818 23531 22858 23681 23096 23688 22874 23413 22912 23520 22897 23754 22996 23746 23029 23400 22772 23397 22596 23350 22424 23161 22570 23501 23532 23619 22908 23501 23025 23588 22978 23593 22860 23465 22905 23524 22811 23501 22792 23673 22646 23325 22935 23506 22857 23715 22854 23620 22796 23540 22918 23456 22694 23664 22772 23521 23051 23634 22944 23421 22889 23500 22909 23520 22888 23652 22963 23607 22712 23532 22726 23413 22800 23671 22918 23429 22693 23480 22825 23436 22859 23587 22784 23488 22852 23387 22862 23561 22796 23404 22850 23456 22979 23505 22792 23281 22932 23480 22880 23430 22885 23364 23025 23352 23098 23483 23006 23446 22973 23489 23050 23386 22785 23406 23027 23505 22820 23274 22985 23264 22888 23303 22948 23434 22789 23402 23214 23264 22963 23465 23036 23237 22816 23481 23083 23226 23210 23416 22887 23116 23251 23239 23158 23464 23040 23283 22999 23399 22797 23132 23485 23106 22952 23749 22824 23297 23415 23109 23254 23624 22916 23184 23189 23284 22872 23362 23191 23072 23104 23364 22922 23392 23112 23113 23069 23445 23001 23291 23329 23031 23050 23430 22939 23298 23096 23144 22883 23343 23393 22935 23448 22900 23363 23175 23461 23079 23554 22713 23464 23111 23300 23233 23362 23042 23440 22932 23143 23110 23029 23048 23308 22849 23491 23346 23362 23095 23265 23332 23261 23084 23506 22989 23568 23016 23260 23146 23092 22976 23663 22768 23556 23044 23363 23044 23289 23076 23447 22874 23575 22792 23462 23076 23271 22957 23578 22952 23497 22829 23690 23042 23540 22957 23502 23014 23459 23062 23461 22913 23715 22608 23673 22869 23512 22980 23399 23030 23558 22953 23729 22672 23829 22838 23761 22823 23555 22924 23399 23019 23518 22983 23686 22625 23671 22692 23600 22986 23496 23022 23344 23110 22828 22984 23544 22833 23761 22487 23760 22776 23688 22773 23696 22747 23658 22734 23452 22896 23408 22884 23339 22789 23493 23136 23564 22752 23417 22871 23413 22762 23475 22733 23512 22770 23477 22892 23497 22809 23566 22711 23622 22726 23666 22736 23579 22734 23472 22656 23366 22842 23333 22853 23393 23000 23372 23020 23360 22839 23429 22998 23478 22956 23418 22914 23434 22805 23464 22848 23297 23000 23552 22966 23424 22952 23384 23002 23414 22821 23470 22712 23274 22694 23419 22688 23535 22915 23616 22933 23409 23040 23270 23115 23062 23068 23095 23148 23142 23241 23276 23320 23256 23297 23067 22827 23137 22956 23462 23363 23659 22972 23584 22890 23604 22828 23434 22964 23196 22984 23025 23127 23200 23149 23430 23414 23176 23428 22980 23250 23057 23113 23186 22796 23418 23348 23155 23356 23068 23398 22848 23651 22742 23466 22807 23467 22912 23565 22956 23351 23139 23280 23303 23113 23292 23090 23151 23290 23212 23371 23016 23537 22924 23527 22764 23537 23072 23415 23092 23360 23048 23351 23048 23296 23150 23412 22995 23594 22718 23639 22851 23447 23116 23173 23002 23521 22717 23654 22880 23461 23033 23461 22917 23587 22744 23692 22791 23579 22956 23501 22944 23674 22698 23716 22788 23562 23034 23233 23115 23574 22882 23621 22716 23527 23000 23258 23001 23686 22696 23741 22632 23575 22760 23355 22875 23540 22732 23408 22821 23543 22779 23528 22816 23449 23002 23374 22723 23387 22966 23619 22672 23511 22903 23394 22864 23655 22967 23505 22931 23368 22888 23452 22726 23450 22784 23473 22855 23332 22829 23447 22990 23444 23108 23436 22872 23312 22884 23365 22704 23385 22988 23427 22788 23552 23046 23337 23031 23194 22876 23172 23113 23590 22973 23159 22832 23224 23448 23310 22935 23009 23317 23525 22892 23608 23119 23501 22906 22514 23101 23671 22984 23162 23094 23364 23028 23136 23380 23236 22867 23143 23488 23114 22951 23252 23244 23100 23271 23177 23385 22728 23600 23015 23260 23168 23329 22892 23472 23013 23216 23119 21592 21339 22144 22175 22065 22130 22697 21841 22821 25655 23866 23763 23781 23164 23851 23208 23649 23195 23374 23086 23624 22822 23698 22984 23468 23058 23358 22253 22920 22326 23033 22140 23014 22541 22880 22528 26095 24183 23682 22836 23670 22846 23650 22945 23534 23024 23397 23074 23539 22880 23689 22639 23877 21580 23232 21812 23321 22437 23317 22437 23303 22676 23082 23239 23736 22960 23585 22835 23552 22878 23542 22671 23500 22743 23541 22702 23595 22714 23489 22823 23045 22570 23229 22681 23074 22743 23371 22801 23223 22836 23598 23064 23410 23017 23342 22964 23364 22927 23336 23032 23288 22983 23352 22796 23369 22769 23324 22727 23028 22680 23284 22752 23168 22854 23119 22880 23168 23079 23280 23095 23169 23006 23120 22927 23198 23048 23153 23014 23142 23209 23094 23319 23082 23379 23101 23176 23105 23336 23484 23575 22832 23543 22832 23447 22859 23496 22889 23517 22998 23442 23124 23256 23145 23333 23040 23385 22962 23800 23134 23380 23212 23224 23004 23277 23159 23381 22973 23514 22979 23527 22885 23563 22681 23579 22743 23626 22795 23657 22868 23518 22959 23581 22930 23278 22896 23436 22967 23424 22857 23658 22868 23686 22698 23541 22732 23719 22854 23493 22915 23541 22672 23574 22740 23555 22696 23532 22003 23480 22633 23431 22973 23408 22832 23432 22682 23608 22636 23529 22646 23665 22651 23498 22651 23468 22924 23349 22927 23376 22938 23347 22983 23401 22812 23447 22844 23349 22770 23367 23044 23346 22914 23180 22896 23432 22964 23394 22820 23417 22909 23488 22835 23258 22912 23242 23213 23629 23244 23045 22936 23187 22861 23623 22940 23396 22672 23146 23104 23117 23427 23381 23053 23070 22901 23453 22800 23602 23104 23183 22899 23049 23244 23244 23120 23348 23443 22881 23468 22766 23447 23016 23219 23174 23280 23271 23063 23117 23349 23053 23376 22660 23554 22784 23513 22928 23461 23076 23391 23196 23158 23121 23287 23129 23442 22812 23579 22898 23616 22638 23476 22841 23451 23013 23452 23016 23333 22933 23417 22882 23632 22808 23620 22664 23755 22624 23670 22817 23476 23046 23336 23029 23257 23008 23352 22852 23578 22744 23758 22730 23504 22756 23381 22903 23430 22880 23394 22792 23384 22746 23499 22750 23639 22597 23488 22664 23430 22868 23402 22745 23534 22835 23488 22633 23459 22874 23371 22803 23565 22747 23444 22804 23296 22711 23366 22786 23380 22740 23452 22844 23334 22871 23296 22809 23406 22725 23342 22929 23256 22822 23196 22750 23277 22641 23311 22714 23380 23041 23568 23041 23525 22925 23080 22952 23249 23327 23013 23287 23161 22781 23456 22858 23623 22965 22953 23272 23113 23255 23184 22790 23247 22887 23569 23290 22931 23527 22679 23605 22830 23303 23142 23063 23268 23169 23020 23328 22976 23169 23233 23197 22860 23533 23033 23148 22945 23458 22948 23261 22865 23457 23142 23424 22865 23226 22885 23494 23175 23604 22765 23182 22835 23601 22968 23680 22855 23257 22614 23553 22983 23687 22817 23857 22699 23637 22947 23654 22960 23316 22880 23680 22838 23325 22967 23573 22919 23302 22928 23645 22736 23524 22803 23471 22682 23500 22796 23492 22758 21815 20232 21425 21314 21768 21143 22102 21557 23553 22529 26276 24628 24928 23763 24237 23552 20885 22423 23241 20999 23312 22649 23197 22476 23187 25339 24904 23794 24221 22816 23172 22373 22903 22705 23150 22586 22981 22672 23057 22711 23056 22892 23611 23047 23555 22976 22982 22695 23068 23064 23053 22950 23115 22747 23097 22733 23536 23005 23625 22992 23512 22913 22833 22785 23093 23102 22985 23325 22936 23212 23034 22971 23183 23028 23430 23069 23616 22892 23415 23090 23036 23360 22980 23517 22784 23652 22798 23542 23023 23296 23015 23382 23120 23268 23171 23170 23246 23084 23175 23168 23138 23305 23154 23059 23029 23458 22978 23281 23085 23536 22913 23492 22890 23628 22736 23696 22871 23627 22660 23558 22771 23600 22635 23584 22612 23608 22721 23584 22680 23601 22616 23672 22540 23719 22543 23672 22809 23665 22971 23598 22520 23686 22904 23674 22901 23632 22689 23671 22872 23680 22801 23520 22504 23636 22641 23558 22647 23476 22774 23488 22828 23436 22637 23464 22632 23491 22632 23532 22720 23464 22656 23559 22656 23387 22736 23264 22657 23341 22813 23328 22743 23362 22797 23372 22882 
20910 20957 21158 21188 20839 21379 20379 21543 20613 21213 20807 21205 20857 21462 20396 21457 20545 21357 20747 21062 20843 21321 20635 21470 20437 21415 20643 21175 20744 21319 20487 21511 20525 21527 20595 21146 20761 21160 22007 21010 22036 21079 21888 21405 21691 21431 21484 21607 21522 21687 21656 21952 21683 22200 21623 22032 21588 21581 22088 21792 21926 22136 21923 22117 21768 22059 21716 22236 21765 22397 21699 22312 21552 22263 21754 21529 21111 21387 21152 21260 21371 21195 21376 21239 21383 21404 21415 21392 21197 21586 20952 21643 20876 21750 21008 21648 21136 21546 21132 21413 21330 21293 21360 21271 21189 21496 21167 21684 20869 21682 20791 21843 20851 21849 20817 21760 21010 21796 21002 21544 21090 21542 21146 21236 21179 21351 21123 21585 21026 21825 20876 21867 20887 21788 20891 21755 21014 21525 21208 21651 21066 21672 20874 21871 20692 22041 20897 21761 20927 21549 21037 21472 21265 21590 21031 21717 20773 21632 20947 21624 21143 21383 21175 21760 20768 21893 20653 21808 20930 21575 20743 21654 20960 21577 20823 21861 20717 21485 21002 21463 20896 21525 21028 21655 16621 18475 17552 18248 17670 18278 17559 18657 17607 18458 23536 21702 21045 21861 20620 21814 20813 21646 20999 21692 21006 21614 21259 21802 20759 21698 20949 21604 21201 21555 20933 21761 20985 21756 20861 21584 20932 21564 21120 21687 20890 21610 21024 21847 20888 21645 21015 21588 21095 21568 21062 21701 20969 21597 20897 21767 21020 21751 20853 21640 21009 21536 21047 21526 21260 21466 20964 21420 20843 21560 21046 21725 20993 21811 20973 21548 20963 21463 21076 21276 21049 21095 21204 21120 21318 21437 21413 21280 21473 21148 21333 21205 21355 21186 21159 21312 21181 21223 21067 21281 20872 21263 20849 21271 20867 21396 20959 21371 20880 21529 20922 21527 20853 21528 20963 21477 20995 21505 21016 21369 20925 21393 20977 21545 21328 21372 21352 21320 21197 21207 21252 21334 21156 21257 21218 21317 21230 21287 21329 21369 21369 21325 21357 21295 21413 21207 21412 21318 21382 21285 21485 21131 21595 21048 21612 21217 21596 20884 21812 20644 21716 20874 21605 20967 21847 20982 21562 21074 21568 21065 21536 21414 21373 21216 21492 21216 21309 21257 21571 21255 21432 21075 21504 21041 21731 20872 21820 20804 21980 20708 21868 19288 20405 19615 20265 19717 20048 19664 19360 19110 19376 21600 21777 21117 21857 20871 21895 21014 21939 20646 21906 20728 21752 20972 21645 21150 21369 21143 21333 21284 21469 21024 21752 20878 21912 20722 21913 20912 21829 21072 21655 21064 21276 20785 21531 20755 21779 20748 21797 20949 21783 20857 21591 20993 21672 20891 21939 21015 21509 20782 21617 20992 21623 20989 21808 20780 21655 20646 21472 20924 21613 20846 21747 20845 21495 20834 21623 20791 21728 20662 21725 20867 21743 20680 21627 20704 21509 21027 21584 21058 21636 20937 21428 20923 21574 20782 21665 20727 21608 20866 21481 20971 21500 21255 21454 21049 21485 21048 21509 20957 21651 20975 21552 20847 21379 21005 21315 21032 21393 21056 21240 20843 21512 20896 21647 21275 21580 20747 21411 20934 21425 21112 21144 21033 21402 21015 21443 20852 21750 20237 21547 20783 21437 20953 21483 21310 21356 21339 21196 21127 21207 20960 21847 20827 21601 20849 21269 21404 21131 21424 21413 21127 21233 20855 21618 20877 21886 21025 21416 21009 21196 21504 21111 21512 21072 21018 21466 20902 21895 21141 21324 21053 21216 21386 21198 21349 21203 20974 21463 21069 21181 21587 21384 20535 20469 20631 20398 20823 20434 21041 20140 20945 20256 21515 21270 21139 21360 21084 21368 21383 21068 21543 20992 21569 21003 21651 21044 21515 21168 21367 21333 21376 21340 21294 21240 21257 21096 21489 21058 21638 20807 21684 20880 21619 20976 21495 21080 21458 21248 21305 21287 21271 21175 21479 20957 21600 20833 21783 20875 21739 20647 21681 20893 21698 20957 21586 20965 21521 21099 21571 21113 21281 21082 21472 21015 21575 20871 21731 20697 21878 19990 21899 20609 21911 20559 21815 20548 21764 20692 21767 20789 21764 20802 21623 20883 21656 20865 21736 20715 21834 20627 21856 20071 21803 20699 21563 20753 21624 20800 21568 20721 21738 20688 21398 21036 21465 20857 21715 20661 21463 21005 21334 20695 21603 20836 21527 20773 21649 20859 21597 20736 21472 20487 21544 20600 21709 20814 21664 20880 21705 20766 21616 20801 21395 20909 21380 20928 21479 20739 21635 20985 21592 21093 21384 20773 21845 20745 21469 21075 21431 20851 21316 20869 21597 20941 21269 20732 21387 21009 21484 20853 21358 20997 21617 20663 21326 20889 21534 20866 21394 20953 21364 20940 21543 21233 21279 20893 21198 20869 21265 20979 21587 21222 21492 20231 20725 20376 20635 20451 20669 20480 20615 20497 20757 21040 21117 20956 21236 20877 21128 20710 21239 20912 21132 21061 21216 20864 21149 20941 20960 20951 21425 20903 21013 20851 21384 21333 21687 21478 21552 21030 21079 20925 21065 20707 21067 20804 20679 20922 21261 21457 21145 21401 20924 21207 20825 21289 21027 21587 21125 21458 21053 21053 20948 21223 21286 21361 21186 21137 20902 21127 21244 21481 21365 21287 20892 21027 21049 21457 21255 21353 20765 21434 21141 21676 20873 21257 20817 21613 21087 21228 20899 21461 21121 21534 20699 21380 21272 21495 20839 21368 21036 21599 21016 21438 21059 21652 20865 21239 21046 21653 20923 21453 21175 21565 20704 21564 21023 21280 20652 21624 20960 21639 20796 21706 20804 21332 20898 21782 20839 21568 20963 21495 20549 21782 20793 21216 21001 21658 20700 21687 20968 21497 20754 21610 20804 21430 21046 21476 20648 21608 20792 21281 20969 21592 20430 21720 20931 21313 20787 21660 20626 21817 20583 21306 20812 21427 20565 21618 20757 21316 20847 21454 20708 21639 20611 21358 20885 21384 20853 21429 20776 21498 20604 21456 20725 21489 20688 21520 20727 21463 20727 21468 20579 21442 20728 21299 20316 21265 20577 21155 20395 21336 20412 21263 20903 21629 20840 21365 20672 21463 20759 21483 20891 21227 20888 21177 20938 21257 20933 21440 20807 21202 20925 21191 21010 21273 20755 21344 20725 21362 20903 21248 20873 21193 20915 21329 20588 21462 20705 21546 20817 21207 20967 21163 20977 21120 20688 21419 20761 21541 20796 21105 20995 21190 21208 21275 20814 21177 20738 21523 20752 21436 20743 21089 21085 21399 21305 21016 20866 21103 20713 21638 20613 21529 20727 21209 20845 21146 21362 21009 21217 21029 20969 21162 20908 21614 20600 21436 20748 21056 20904 21041 21320 20961 21443 21020 20744 21085 20984 21433 21176 20857 21405 20665 21505 20704 21565 21105 21461 20940 21253 21013 21184 21146 20924 21263 21222 21042 21208 20933 21382 20807 21392 20816 21318 20763 21345 21001 21255 20951 21236 21072 21145 20991 21319 21165 21294 20821 21431 20898 21317 20793 21540 20658 21479 20840 21581 20808 21477 20791 21316 20989 21158 21060 21195 20944 21319 20973 20635 20942 21347 20911 21436 20704 21501 20568 21662 20499 21640 20528 21635 20728 21580 20675 21475 20801 21436 20788 21264 20868 21161 20979 21249 20853 21449 20774 21303 20825 21477 20658 21527 20621 21737 20529 21632 20387 21680 21039 21752 20562 21451 20500 21461 20632 21517 20599 21219 20615 21405 20876 21212 20992 21193 20765 21517 20652 21601 20458 21443 20490 21542 20577 21404 20578 21454 20555 21289 20642 21352 20745 21357 20813 21353 20815 21259 20845 21360 20584 21282 20771 21436 20689 21255 20845 21216 20685 21234 20719 21468 20814 21186 20669 21312 20885 21299 20733 21110 20867 21171 20754 21237 20718 21394 20711 20957 21004 21024 20823 21132 20610 21459 20689 20903 21109 21179 20893 21076 20660 21534 20693 21220 20759 21187 21287 21025 20645 21556 20620 21202 20904 20967 21034 21111 20968 21601 20754 20972 21456 21004 20756 21579 20787 21048 21317 21382 21079 20995 21520 20679 21112 21002 21396 20805 21101 20971 21433 21154 21132 20534 20937 20725 21075 20780 21425 21000 21404 21117 21411 21028 21324 20862 21241 20790 21260 20513 21081 20627 21239 20807 21415 21003 21552 20925 21546 20823 21353 20701 21016 20553 21353 20871 21584 20855 21364 20710 21152 20743 21561 20779 21448 20373 21405 20775 21543 20614 21288 20755 21554 20739 21085 20793 21564 20672 21206 20680 21532 20710 21134 20672 21632 20485 21544 20713 21329 20609 21436 20574 21305 20548 21442 20772 21248 20818 21368 20382 21597 20520 21453 20693 21256 20441 21315 20631 21743 20701 18058 17525 18598 18053 17689 18184 18638 18393 18941 22976 21607 21208 21477 20755 21593 20869 21536 20830 21335 20833 21299 20618 21427 20805 21227 20927 18844 19599 19970 19329 19926 19353 19909 19428 19707 19741 23988 21560 21331 20721 21660 20727 21652 20809 21213 21136 21252 21271 20960 20937 21020 20668 21275 19000 20737 20029 20802 19974 20348 20230 20064 20369 20097 21589 20859 21501 20992 21225 21014 21003 21184 20972 21077 21096 21109 21078 21067 21443 20747 21453 20108 21069 20067 21019 20360 21072 20383 20873 20391 20817 20912 21309 20987 21180 21008 21281 21001 21079 21079 21084 20998 21077 20943 21097 20975 21091 20945 20736 20608 20875 20688 20928 20633 20950 20646 20992 21171 21175 20807 21235 20887 21091 20904 21162 20909 21189 20621 21308 20490 21472 20497 21384 20538 21454 20471 21312 20649 21334 20638 21448 20613 21513 20279 21563 20377 21351 20531 21325 20610 21322 20690 21266 20711 21259 20807 21212 20797 21171 20809 21216 20877 21071 20792 21181 20599 21159 20766 21282 20533 21335 20601 21383 20545 21265 20480 21352 20673 21089 20730 21040 21063 21042 21096 21334 20973 20829 20759 21107 20665 21571 20617 21536 20801 21041 20499 21012 20903 20911 21319 20993 21149 20843 20804 21124 20709 21423 20811 21189 21191 20916 20917 21002 21191 20945 21305 20805 21237 20661 21348 20718 21086 21096 20829 21188 20997 21036 21131 20819 21347 20568 21335 20608 21399 20833 21264 20922 21128 21015 20977 20967 21239 20628 21543 20522 21431 20502 21395 20649 21401 20848 21088 20923 21136 20739 21386 20546 21511 20363 21591 20332 21553 20642 21236 20883 21128 20975 21117 20867 21505 20594 21522 20370 21612 20497 21452 20662 21313 20755 21376 20546 21359 20485 21399 20594 21371 20683 21367 20342 21267 20583 21331 20776 21253 20468 21145 20634 21292 20461 21336 20579 21287 20572 21114 20722 21161 20771 21121 20752 21113 20656 21164 20544 21251 20649 21238 20600 21275 20453 21206 20598 20949 20848 20984 21036 21175 20923 20898 20859 21371 20666 21400 20937 21216 20442 20921 20929 20865 21106 20887 21335 21003 20940 20887 20632 21544 20568 21417 20571 21006 20926 20793 21259 20817 21285 20917 21127 20640 21332 20700 21109 20845 21211 20988 20905 20995 20960 20883 21184 20766 21345 20861 21278 20678 21381 20775 21144 20725 21266 20945 21312 20987 21050 21013 21181 20843 20969 20896 21021 20899 21108 21040 21127 20953 21025 20875 21111 20776 21083 20857 21161 20918 21270 20736 20960 20803 21242 20674 21444 20429 21536 20392 21477 20651 21319 20869 21145 20966 21033 20790 21431 20429 21623 20322 21443 20362 21398 20567 21187 20655 21086 20669 21161 20599 21262 20751 21353 20329 21364 20537 21760 20465 21206 20471 21449 20310 21329 20661 21178 20549 21268 20663 21101 20713 21151 20585 21178 20593 21251 20724 21103 20597 20780 20665 21207 20700 21214 20569 21280 20401 21260 20851 21069 20547 21025 20728 21063 20921 21191 20631 20935 20711 21021 21160 21150 20663 20960 20904 21554 20768 21016 20821 21454 20643 21149 21067 21021 20501 20727 21179 20992 20679 21008 21232 20833 20736 18416 16328 16747 16996 17232 17487 17092 17959 19351 19321 24465 24055 22884 23464 22777 22625 17420 19991 19666 18294 19767 20061 19997 19984 19782 24428 22213 21975 22601 21231 20975 20215 20295 20449 20051 20822 19745 20904 20109 20447 21303 21303 21012 21329 20753 21477 20040 21072 19951 21057 20211 20814 20359 20797 20259 20934 20829 21440 20625 21524 20517 21049 20343 21272 20336 21208 20386 21065 20599 20977 20386 21212 20542 21677 20759 21232 20690 21221 20606 21299 20621 21224 20541 21390 20788 21376 20547 21512 20381 21469 20507 21351 20558 21259 20560 21075 20685 21193 20669 21383 20683 21187 20819 21008 20803 21038 20771 21111 20744 21221 20610 21198 20670 21153 20628 21256 20622 21291 20480 21139 20457 21258 20756 21358 20693 21398 20441 21339 20617 21296 20664 21334 20809 21385 20677 21504 20733 21554 20675 21527 20587 21564 20693 21419 20746 21620 20644 21580 20509 21490 20780 21493 20602 21520 20636 21365 20689 21484 20719 21122 21239 20898 21083 20971 21188 20976 21159 21031 21078 20960 20908 21109 20992 21060 20871 21005 20999 21031 20883 20949 21014 20941 21017 20941 20999 
20814 21099 20911 21133 20932 21230 20850 21237 20816 21180 20929 21252 20899 21168 20694 21210 20825 21315 20821 21047 21067 21109 20784 21201 20789 21329 20982 21042 21093 21049 20961 21132 20857 21325 20827 20995 20903 21016 21143 21024 20728 21093 20841 21365 20845 20983 20979 20978 21172 21064 20820 21219 20852 21345 20951 20759 21002 20933 21120 21164 20893 21112 21041 20999 21324 20887 21156 21028 21143 21148 20897 21125 21152 21040 21117 21452 20870 21477 21060 21543 20947 21421 21049 21553 21111 21520 21056 21473 21161 21464 21132 21473 20969 21499 21107 21582 21094 21592 21108 21420 21140 21388 21113 21444 21198 21411 21171 21490 21192 21565 21056 21543 21472 21569 21105 21496 21068 21543 21103 21523 21152 21565 21191 21317 21203 21670 21255 21448 21171 21458 21001 21519 21359 21553 21098 21600 21165 21255 21210 21577 21356 21433 21189 21432 21243 21599 21096 21648 21093 21493 21132 21376 21399 21278 21419 21300 20999 21598 21121 21602 21154 21316 21434 21377 21204 21446 21156 21707 21171 21322 21494 21296 21389 21523 21063 21719 21199 21261 21469 21291 21146 21432 21073 21597 19264 19476 19310 19479 19201 19531 19353 19421 19712 22151 22808 21204 21235 21179 21231 21189 21356 21066 21268 21280 21092 21323 21157 21228 21483 21078 21344 21180 21423 21280 21141 21313 21239 21219 21472 21120 21414 21149 21456 21243 21328 21255 21293 21210 21527 21189 21472 21177 21476 21052 21451 21335 21221 21253 21543 21280 21392 21271 21545 21027 21536 21020 21568 21072 21445 21201 21423 21274 21267 21195 21533 21261 21444 21103 21598 21089 21636 21021 21591 20889 21552 20908 21616 20541 21637 21046 21608 21025 21511 21218 21467 21211 21462 21235 21328 21248 21367 21173 21312 21241 21372 21214 21372 21207 21327 21221 21455 21115 21483 20981 21543 20983 21672 21067 21625 21019 21571 21065 21660 20936 21490 21005 21719 21056 21695 21001 21497 21180 21463 21033 21493 21008 21400 21050 21459 21018 21452 21021 21464 21038 21495 20997 21546 21048 21533 21012 21626 20922 21536 21050 21477 21018 21544 21022 21508 21067 21491 21331 21551 21081 21433 20971 21472 21061 21398 21083 21485 21171 21459 21173 21384 21192 21448 21158 21594 21044 21509 21111 21349 21085 21388 21057 21570 21109 21465 20987 21552 21238 21441 21094 21389 20111 20673 20421 20689 20540 20570 20465 20018 19989 20023 21462 21307 21133 21546 21064 21478 21040 21472 20968 21284 20943 21344 21283 21209 21384 21476 21237 21214 21047 21317 21084 21541 20957 21526 20985 21291 21020 21294 21299 21237 21378 21191 21075 21221 21061 21558 20992 21615 21246 21235 20947 21248 21211 21242 21407 21173 21297 21284 21353 21030 21387 21185 21329 21191 21329 21304 21181 21331 21184 21348 21261 21227 21383 21185 21427 20999 21361 21120 21377 21231 21197 21353 21207 21333 21141 21277 21290 21289 21320 21221 21415 21045 21460 21208 21332 21307 21413 21243 21269 21280 21258 21127 21475 21104 21453 21103 21479 20980 21429 21255 21354 21299 21181 21263 21220 21202 21459 21037 21453 20928 21511 20996 21428 21201 21401 21193 21221 21161 21420 21088 21497 21096 21511 20931 21528 21027 21466 21090 21440 21192 21319 21257 21441 21143 21497 21005 21547 21095 21527 20870 21649 21121 21383 21182 21411 21184 21439 21017 21495 21016 21469 20980 21504 21052 21384 21112 21463 21061 21287 21163 21493 20989 21614 20905 21629 21029 21460 21146 21427 20982 21359 20953 21568 20887 21511 21115 21365 21025 21401 21136 21364 21063 20940 20615 21160 20588 21190 20596 21136 20587 21091 21176 21456 21147 21469 21055 21403 20903 21527 20865 21623 20995 21461 20803 21463 21025 21363 21071 21378 21026 21325 20983 21506 20952 21344 21134 21416 20912 21547 21264 21317 20967 21390 21090 21347 21141 21381 21004 21335 21008 21306 20994 21376 21080 21489 20933 21482 20994 21376 20951 21385 20885 21495 20980 21396 21105 21286 21180 21421 21126 21235 21071 21273 21119 21453 21073 21430 20986 21531 21012 21387 21399 21402 21141 21415 20856 21307 20960 21323 20931 21264 21074 21348 21176 21209 20933 21208 20961 21250 21093 21412 20937 21570 21097 21172 21223 21197 21202 21283 21103 21481 21022 21397 21358 21175 20967 21305 21504 21216 21223 21249 21257 21075 21336 21288 21239 20998 21305 21152 21390 21257 21248 21174 21236 21072 21251 21153 21205 21255 21317 21244 21319 21139 21391 21244 21399 21248 21348 21210 21248 21138 21260 20883 21325 21072 21462 21204 21332 21032 21310 21126 21474 21145 21232 21065 21427 21201 21312 21094 21340 21166 21367 20854 21347 21131 21451 21035 21316 21071 21326 21175 21416 21106 21275 20873 21348 21037 21532 21060 21549 21060 21425 20914 20919 20682 21164 20747 21207 20741 21250 20856 21237 20904 21538 21076 21518 21175 21428 21110 21556 21056 21516 21139 21441 21129 21449 21033 21591 21069 21431 20824 21399 20560 21499 20726 21392 21103 21458 21031 21376 20966 21413 20916 21293 20983 21436 20935 21368 20959 21447 20973 21351 20880 21293 20960 21341 20984 21514 20890 21516 20826 21382 20797 21406 20960 21392 20925 21401 20842 21264 20971 21473 20915 21381 20800 21402 21003 21479 20864 21320 21030 21501 21053 21393 20859 21195 21072 21433 21053 21285 20813 21367 20999 21335 21358 21334 20966 21368 20915 21336 20919 21341 20890 21318 21082 21283 20816 21168 21089 21323 20913 21259 21015 21261 20970 21446 21133 21166 20793 21475 21024 21255 20933 21361 20957 21088 21229 21305 20945 21319 21057 21213 20932 21397 21039 21109 21297 21200 20969 21472 20918 21159 21079 21378 20951 21173 21189 21100 20934 21348 20998 21272 21229 21194 20894 21488 20980 21381 21271 21140 21141 21485 21031 21101 21326 21153 20903 21460 21018 21368 21299 21196 21111 21428 21248 21088 21141 21191 21053 21283 21322 20967 21367 21133 21188 21136 21226 21131 21341 20498 21207 21313 21017 21274 21120 20976 21121 20953 21148 21136 20919 21016 21143 21000 21367 21085 21233 21187 21034 21137 21321 20992 21293 20973 21268 21076 21224 21061 21250 21120 21277 20983 21341 20939 21294 21209 21078 21094 21319 20976 21389 20853 21293 21063 21231 21120 21145 21134 21340 21031 21428 20896 21360 20933 21325 21149 21108 21041 21259 20979 21368 20844 21436 20890 21390 21115 21147 21056 21793 20979 21341 20980 21463 20844 21440 20896 21376 21057 21147 21042 20743 21047 21283 21060 21360 20845 21452 20872 21385 20960 21367 21107 21251 20925 21371 20997 21395 20961 21316 20828 21283 21287 21428 20765 21374 20939 21248 20853 21481 20941 21331 20967 21315 21001 21178 21079 21426 20800 21396 20783 21433 20773 21273 20875 21355 20904 21278 20964 21314 20921 21325 20821 21291 20957 21309 20851 21354 20880 21377 20890 21339 20905 21237 20905 21328 20923 21236 20964 21277 21013 21239 20823 21251 20811 21347 20824 21320 20899 21319 20919 21366 20930 21172 20964 21105 20930 21088 21079 21227 20939 21144 21013 21170 21006 21241 20849 21173 20875 21261 20979 21409 20801 21415 20965 21320 20960 21216 21007 21056 20951 21597 21123 21157 21160 21042 21173 21189 21127 21086 21044 21191 20827 21172 20874 21278 21040 21346 20880 21416 20917 21504 21014 21136 20992 21095 20978 21068 21145 21122 21045 21140 21192 21161 21157 21187 21079 21062 21063 21061 21139 21027 21187 21131 21164 20962 21336 20912 21217 21504 21152 21072 21163 21084 21169 21178 21101 21095 21149 21156 21138 21144 21237 21096 21274 20893 21381 21020 21377 20922 21168 21099 21127 21059 21279 20985 21376 20809 21309 20999 21094 21032 21185 20951 21448 20780 21371 20924 21251 21012 21298 20894 21422 20717 21408 20903 21334 21034 21251 20997 21397 20740 21401 20888 21255 21045 21325 20978 21440 20810 21448 20884 21342 20951 21323 20869 21340 20930 21348 20951 21141 21044 21345 20945 21415 20854 21324 20983 21262 20778 21216 21056 21345 20811 21260 21024 21402 20750 21330 20806 21269 20915 21233 20855 21301 21060 21241 20928 21232 20841 21281 20918 21256 20782 21217 20784 21595 20768 21152 20903 21355 20904 21320 20881 21280 20920 21240 20808 21200 20892 21232 21014 21271 20992 21266 20888 21149 20954 21313 20942 21185 21403 21130 21069 21173 20880 21021 21116 21227 20887 21161 21079 21409 20942 21113 21036 21305 20982 21330 21230 21207 20844 20956 21237 21079 20999 21260 21061 21078 20717 21163 21315 21029 21205 21186 21157 21045 21259 20969 21216 21176 21064 21076 21218 20970 21079 19311 19250 19307 19604 19256 19432 19478 19457 19300 21576 20985 21100 21161 21159 20960 21281 20752 21365 20800 21203 21009 21363 20941 21298 20805 21212 19815 20397 20268 20388 20121 20412 19856 20429 20461 20358 22573 21280 20937 21056 20955 21155 20892 21336 20765 21320 20713 21300 20881 21198 20854 21137 20775 20674 20422 20784 20472 20821 20450 20795 20440 20822 20512 21334 20742 21337 20797 21445 20748 21178 20795 21081 20764 21239 20824 21248 20867 21205 20832 21216 20375 20994 20481 21011 20619 21075 20471 21070 20579 22286 20892 21264 20897 21308 20816 21235 20915 21148 20861 21121 20837 21021 20924 20975 20944 21003 20944 20921 20756 20765 20812 20957 20716 20806 20865 21035 20929 21077 20935 21184 20869 21057 20979 20977 20969 21016 20886 21064 20910 20960 20856 20967 20873 21092 21164 20962 21210 21110 21175 21021 21074 21096 20927 21131 21037 21075 20961 21125 20962 21092 21120 21107 21069 21091 21187 20953 21177 20877 21221 21006 21225 21411 21314 20887 21216 20720 21353 20852 21235 21081 21225 20973 21222 21018 21268 21004 21049 20914 21139 21018 21283 20836 21338 20832 21360 20794 21398 20817 21353 20812 21175 20905 20996 21032 21238 20940 21235 20970 21306 20789 21409 20792 21206 20814 21312 20954 21300 20840 21260 20839 21219 20912 21392 20728 21354 20682 21387 20740 21329 20758 21287 20836 20893 20816 21177 20861 21314 20737 21319 20837 21165 20800 21313 20904 21129 20939 20528 20803 21145 20814 21336 20837 21251 20954 21167 20722 21253 20946 21089 21003 21162 20951 20993 20992 21325 20856 21254 20883 21187 20778 21194 21076 20939 21195 21235 20889 21062 20873 21349 20808 21330 20954 21136 20856 21066 21156 20976 21180 21104 20896 21045 21125 21090 20981 21066 21121 21058 21061 21061 21037 21099 21017 21051 21209 20986 21170 20984 21152 21044 21088 21017 21163 21104 21032 21021 21233 21007 21149 21287 21270 20818 21271 20884 21299 20983 21136 20971 21030 21061 21134 20968 21189 20809 21273 20208 21361 20697 21392 20920 21312 20951 21218 20903 21128 20966 21187 21044 21296 20836 21253 20141 21307 20742 21380 20824 21312 20887 21248 20828 21322 20803 21337 20773 21317 21303 21184 20835 21199 20874 21200 20849 21226 20804 21208 20761 21222 20772 21348 20752 21328 20648 21255 20704 21229 20891 21217 20907 21203 20925 21139 20917 21140 20899 21242 20842 21291 20928 21271 20795 21253 20854 21097 20877 21147 20856 21369 20870 21213 20962 21200 21021 21096 21053 21116 21078 21085 21101 21146 20873 21051 21092 21289 20829 21326 20838 21001 20931 21075 21138 21120 20903 21115 20984 21440 20890 21015 20925 21177 21191 20996 20954 21292 20864 21064 21086 20919 21276 20845 21242 21069 21124 21206 21210 21136 21221 20963 21173 21193 21049 20943 21277 20896 20970 21008 21297 20950 21568 20953 21086 21126 21309 20832 21112 20917 21233 21007 21237 20971 21004 20745 21293 20940 21363 21010 21229 20709 21205 20960 21317 20954 21223 20662 21350 20919 21376 20841 21109 20976 21381 20900 21031 20935 21379 20812 21255 20941 21329 20704 21386 20749 21225 20771 21257 20809 21223 17605 18549 18212 18633 18541 18900 18417 20173 19580 20151 22611 22509 21648 22112 21478 18022 18549 20480 19921 19431 19998 20577 20037 20504 20106 22780 21954 21310 21659 21084 20646 20674 20422 20711 20337 20650 20530 20842 20368 20727 20934 21191 20930 21110 20896 21088 20381 20925 20496 21064 20688 20791 20571 20694 20713 20797 21032 21129 20918 21032 20717 20917 20699 21153 20624 21274 20676 21001 20651 20741 20750 21148 21107 20959 21110 20968 20969 21021 20910 21148 20771 21138 20967 20979 21015 20963 21202 21014 21088 21024 21136 21025 21141 20818 21179 20772 21193 20249 21184 20930 21152 20992 21095 20944 21129 20892 21135 21120 21035 21018 21032 21051 20962 21013 21069 20944 21084 20936 21175 20963 21152 20919 21147 20965 21168 20888 21221 20887 21184 20967 21144 20909 21198 20869 21218 20908 21161 20922 21204 20887 21274 20896 21211 20913 21213 20866 21371 20873 21226 20781 21210 20936 21211 20867 21120 20848 21208 20918 21287 20845 21093 20920 21184 20912 21159 20782 21213 20868 21168 20817 21237 20819 21195 20871 21565 20837 21383 20804 21221 20865 21372 20779 21333 20855 21221 
35960 38940 37078 39252 37024 40407 36226 40359 35698 39680 37008 40184 36772 39375 34562 39952 36008 40975 35984 38288 38608 39056 35272 39782 35575 41033 37828 38131 38864 38375 37335 39168 36380 41233 36171 37549 36800 37747 39392 37856 34839 38688 36144 41601 36423 37728 37633 37516 39564 38456 35776 40098 36228 41267 37546 35152 37591 37046 38790 39610 36818 38928 38168 37791 41205 36760 39320 37996 39434 39468 36626 39024 39301 38052 39261 37702 40680 37078 40480 37930 39408 38403 38099 37664 38164 39108 40617 36224 40847 35322 41513 36891 39382 38706 37878 38060 39649 36838 40989 35563 41329 36461 40648 37029 40328 38279 39360 37350 39881 35875 42251 34412 42240 33792 38709 42985 38746 33495 38952 33120 39008 33822 39773 41184 40165 34927 40327 42503 39852 42583 37916 33228 41559 33582 38696 33929 39509 40528 40224 33893 41386 42523 40048 42343 40768 34443 38621 34404 38679 43040 39412 41512 42203 40960 42420 41040 37931 34173 38772 34040 39156 41063 42512 41794 40105 42552 39578 35486 39554 41222 43202 40929 42048 33289 38337 35584 40053 40666 42998 41148 39490 42323 38686 34210 39355 31780 40096 32037 38611 32622 40387 41664 34432 40022 36705 39860 40491 39968 40648 39962 41689 38663 40480 40599 38836 41317 39641 40406 43136 38860 41287 39925 42525 40699 39440 41033 40698 40323 42704 39034 42155 39685 42468 40807 41184 40604 41089 40242 33366 39622 42645 39936 42824 38580 42646 41647 40416 40464 33546 40261 41751 40837 33556 37827 33064 37753 33467 38176 42449 40100 42536 40820 40663 40136 33429 40336 42440 39346 34251 38508 34348 37894 34077 36400 33216 36585 34064 32680 34176 38087 34124 37736 32983 39853 42898 40448 42762 40628 41175 40238 41926 39872 40944 40628 41910 40432 41900 40343 41543 40412 42905 39432 43081 37916 33431 37604 34752 38457 34448 37879 33671 38297 34743 36876 42792 38084 35549 38064 35369 37600 43043 40015 42880 38341 43022 37825 41846 38496 42624 38123 42533 38280 42589 38478 43160 37892 33400 38008 33335 37549 34416 36807 33008 38099 42828 38135 33295 37857 32772 38368 42992 41435 33840 38520 42369 37842 42552 38640 41934 38977 43091 39880 42704 39909 41746 39954 42479 39692 34065 37988 32875 38917 41531 39008 41844 38464 33606 38854 42730 38065 33293 40197 42407 39045 41956 39248 34177 41902 34501 32515 32756 42240 37952 37536 38033 42661 41323 39451 33464 38179 42818 38222 42571 37670 40608 37508 41216 40852 40235 41767 42892 40697 40377 38499 41120 38882 33380 37289 33083 37553 40875 38080 40960 41056 40588 41680 40137 38711 40264 38540 33590 37200 34452 40448 40507 37365 40050 40306 40598 42368 39880 40900 40759 41696 38221 41888 39872 41260 40104 41264 41045 40068 41367 39739 41472 40721 40533 41960 39877 42368 37977 41545 38968 41614 40723 40180 41664 40336 41427 39444 40824 40936 40945 41196 40384 42341 38456 42560 40192 41312 41271 42266 40808 40690 40602 40522 39304 42865 38995 42711 39373 43008 37788 42295 40661 41685 41089 40065 40760 40244 40005 42716 38481 42678 37032 32966 37317 42144 40084 42070 40092 40352 39649 42272 38769 43139 39002 33079 36823 33024 37788 42676 38885 42224 39984 41339 40558 42418 39600 43172 38092 33536 38711 33275 36073 34407 38773 41857 40067 42165 39776 42705 38136 43158 38023 42861 37792 32624 38113 41641 39144 42810 38649 40899 39784 43127 38120 34401 36609 34542 37896 42519 39547 42340 37879 41808 37504 33459 36410 32949 38935 41741 38066 41970 39206 41649 38710 37198 33527 39209 33352 39621 33376 38812 33391 38581 39654 42464 39658 42938 38812 42112 37004 33187 35942 34407 37456 42609 35808 42642 38112 41668 38912 41592 38072 41333 37952 32729 36997 41172 39440 42104 36832 33456 40032 41207 37725 41901 38850 41521 39456 41779 37922 41430 37759 40984 37640 41410 38737 42902 37302 42836 37717 41417 37552 41735 36666 43061 37792 41786 39063 40792 39913 42407 39286 40468 38867 40640 39489 42720 38704 42331 37926 33296 37546 41829 42164 42168 39471 42296 36420 41040 37354 41240 37176 40250 38580 41416 39783 40192 37165 39949 37432 40169 38921 42037 37312 33556 38695 39606 40432 40136 39990 40802 39301 42952 38292 41908 41901 39978 37713 40976 32785 39712 40432 40309 40518 38704 41291 40836 40699 37773 41004 39356 41984 40586 40213 39783 40405 38464 40340 39431 40115 40557 41238 40680 41359 39398 42100 40727 42166 40272 41497 40249 40197 39242 40506 36592 41251 38520 42673 40141 41307 38152 41166 39224 42749 39555 40256 38592 42295 40096 40961 38948 41452 39842 41910 36432 41383 39399 42684 38432 41018 38880 41360 39960 42137 39061 40769 36488 41312 38419 33250 38106 33555 38116 42145 36932 36978 34261 39399 35069 40029 34931 40056 36294 40358 36752 33127 38300 33125 39585 42260 39224 33523 37965 32998 39024 42341 39338 42577 38322 34100 38464 42437 35989 41927 32994 42896 35114 41495 39301 42562 38378 41464 37636 42088 36978 40909 37925 42360 37383 41604 37760 42545 37888 41611 36409 40874 37351 41481 37783 32949 36336 32906 35685 41575 35844 41993 37392 41616 37281 41936 36279 40230 37740 42664 37079 41668 35540 41834 37992 42933 36252 40967 38164 43232 38713 41794 36608 39956 38458 42376 38673 40780 35979 41706 37936 41424 41776 41495 37639 41618 37033 41192 37161 41473 36712 41037 38827 40743 35721 39331 38744 41309 36913 40465 38088 40560 37646 42409 39496 39754 35637 42636 38001 40455 37181 41504 37651 38570 40471 41116 37272 41177 38432 40273 37071 41856 38560 39089 40851 39910 37624 42531 37120 39557 38817 41593 37562 39651 39936 39015 37127 41336 37811 40471 40566 40009 36838 42681 37778 41675 40836 39299 39352 43096 38406 39083 41370 39480 36928 42470 38118 41612 41080 40072 39233 42252 40284 38659 39329 40016 38561 40733 41296 37735 41810 39461 39800 39105 40352 39351 41587 32303 39896 41040 38055 40608 38952 37472 38924 37376 39356 39088 37091 37767 39408 37648 41806 39012 40345 39910 38186 39152 41224 37529 40935 37829 40432 38640 40209 38531 40221 38920 40810 37898 41522 37397 40929 40236 38770 38866 41251 37569 41895 36452 40883 38672 40588 38939 39405 39344 41476 38320 42208 36641 41373 37221 41288 39646 39010 38171 40520 37760 41628 36304 42304 36739 41847 39376 39522 38226 36047 37552 41492 37720 42752 36352 42096 36622 41376 38435 39472 38183 35095 38249 40720 38441 41462 36412 42459 36432 41696 37380 41777 39170 40360 37226 41824 37825 41867 37504 40970 36074 40618 40886 42339 35460 41765 37407 40053 36359 42761 37498 41248 37730 41060 37855 39735 38802 42185 35568 41667 35756 42230 35452 40480 36576 41543 36820 40696 37480 40935 37095 41279 35988 40819 37600 41142 36361 41463 36400 41472 36717 41402 36912 40384 36870 40984 37217 40284 37464 40736 37984 40552 36067 40218 35927 41362 35943 40951 36800 41156 37168 41652 37089 39527 37440 38882 36977 38550 38786 40448 37352 39202 37915 39534 37932 40496 36220 39613 36540 40488 37760 41936 35664 42087 37664 41026 37360 39936 38066 38185 37410 34059 38871 39526 39504 38179 39701 39915 39282 38903 38192 39962 36103 39492 36439 40674 38128 41352 36390 41955 37092 32579 37620 38993 37446 38921 37584 38472 39408 38988 38320 39192 39847 39635 39567 39879 38834 38466 38595 38455 39277 38072 39816 39331 39640 37395 41226 36780 40049 32657 38994 38412 39680 38800 39584 39808 39124 39008 39547 39445 39209 39272 40504 38889 40648 36832 41648 38096 41563 37120 39394 39065 39257 38448 40896 37871 41441 35861 41060 37900 38834 38040 39713 37469 42353 35520 41756 37170 40272 37856 40784 36832 42246 35088 41693 36977 41254 38257 40316 37764 41916 34901 41808 36612 40401 38376 41315 37683 42160 35864 42273 36581 41435 37552 41248 36448 41329 37069 41344 37542 39300 38216 41363 37280 42178 36445 41125 37936 40548 35424 39848 38258 41376 35963 40337 37898 41953 35232 41032 35776 40432 36961 40246 36466 40866 38448 40527 36928 40128 36204 40513 37019 40240 35570 39976 35303 33957 34839 39072 36864 41606 36811 40987 36494 40408 36965 40336 35703 39681 36680 40108 37956 40661 37517 40376 36552 39429 37394 40932 37414 39672 42080 39305 38715 39724 36352 38016 39136 40456 36732 39461 38811 41994 37463 39061 38200 41012 37824 41113 40583 40280 36262 37288 40416 38855 37815 40424 38555 38660 34944 39500 41141 38184 40065 39778 39578 38341 40544 37638 39964 39714 38454 38539 40124 37623 38724 40550 39621 40436 33350 39355 41532 31989 31127 39728 33775 37548 38900 39578 39664 37287 40576 34901 41555 35533 39896 37800 41611 37440 40768 35756 40046 35928 41868 40681 41792 39188 42119 36109 42225 42850 41614 34394 40303 37234 38155 37462 39424 36661 41170 35367 40944 34872 40685 36474 39969 36352 39084 35424 33985 41893 35378 42487 36048 42236 35824 42125 36032 31991 41000 34976 41216 35832 42326 35136 39607 35719 38632 35178 40414 35908 39978 36352 39971 35868 39879 41786 37675 31746 37540 33590 38393 42832 38848 33207 41285 36748 40220 36660 40973 35724 40290 36982 39323 36536 38865 36100 37989 37010 37777 37008 37805 37020 36909 34904 35157 35604 37392 34757 35536 36040 38132 36944 38585 37232 39543 36374 38193 37660 37536 37517 37793 36504 38284 36936 37165 36182 37492 36337 38637 39607 37396 40074 39128 39862 38160 38497 38792 37328 39214 38327 38608 37376 39056 37377 38688 38858 39040 38690 38824 39856 37422 39725 36581 40177 37956 40301 42091 41156 36752 39940 34735 41392 36289 40337 38794 40343 37788 40240 38016 40423 37862 38320 36773 39191 37968 40707 36055 41266 35929 41344 35667 41785 35860 41456 35884 39713 36844 37507 38002 40441 37280 40368 37643 40985 35604 41834 35567 39936 35927 40750 37460 40804 36122 40361 36267 40106 36745 41571 35015 41397 34471 41696 34889 41011 35177 40728 36057 36683 35538 39619 36544 40875 34824 41065 36185 39611 35456 40839 36768 39090 37293 32423 35361 39216 35907 41132 36199 40218 37405 39777 34837 40192 37229 38656 37859 39524 37472 37481 37377 41272 36347 40257 36568 39745 35399 39777 38599 37272 39984 40472 36683 38372 36379 41411 35740 41036 37461 39005 36256 38400 39395 37474 39770 38848 36485 38198 39104 38724 37730 38474 38966 38321 38458 38452 38293 39015 37975 38435 40128 37824 39538 37689 39224 38200 38592 37949 39640 38852 38044 38080 40295 38086 39506 40832 40689 35831 40568 36496 40843 37925 39024 37692 38064 38432 39309 37480 39831 35778 40504 40088 41656 34719 41473 36999 40804 37528 40064 36912 38972 37521 39778 38237 40704 36054 40263 39605 41201 34982 41444 35944 40751 36745 40020 36054 41057 35745 41264 35407 40985 41099 39736 36096 40080 36437 39712 36192 40201 35636 39872 35201 40096 35243 41248 34936 40892 33994 40266 34523 40282 36775 40040 36963 39968 37219 39216 36983 39137 36724 40432 36216 40806 36944 40599 35761 40216 36373 38820 36550 39402 36275 41645 36459 40183 37416 39741 38161 38791 38520 39152 38693 38880 39085 39386 36410 38362 38720 40837 36197 41209 36193 37637 37033 38553 39168 38872 36864 39152 37684 42146 36744 37915 37132 39680 40046 37633 37324 40807 36176 38292 38859 37064 40608 36375 40423 38740 39016 40089 40175 39124 40301 37529 39680 39969 38471 37416 40736 36562 37472 37576 40777 37418 33362 37131 38804 39120 41220 35936 38912 36947 40251 38080 40450 37760 37787 34892 40808 37293 41632 37875 40439 34816 39899 37306 41080 37472 40336 34200 41303 37175 41416 36258 38972 37465 41681 36756 38112 37193 41621 35892 40356 37392 41132 34580 41584 35213 40160 35316 40280 35801 40243 32400 31860 38374 33017 31866 35585 40773 39847 33281 39263 34598 43809 34657 39393 42901 37064 32087 31339 36515 41553 37892 33037 37888 32068 38535 36634 37851 41133 34968 38592 33899 33892 41891 34976 41064 34069 32215 35840 41191 35152 36952 39882 37012 38984 36484 38504 41822 37293 31843 38088 34218 35404 33036 34258 34569 35524 37894 39136 36962 37961 34907 36775 34581 39173 33459 40368 34266 37536 34028 34660 34902 39226 39065 37634 39025 37475 37515 38059 36908 39335 35286 39010 37640 37645 37970 37440 39872 37945 38584 37808 39020 37944 39296 35748 39761 35218 39783 40487 39708 36995 39181 37446 38926 37064 39111 36650 39348 38883 38289 37932 38007 38433 37368 37832 38640 37047 38692 37047 39770 37520 39197 37077 39424 37544 39413 36517 40177 36713 39528 37655 39216 36968 40000 36391 40012 36885 39483 37042 39891 36704 40535 36554 40149 36864 40200 36236 41776 36516 40225 35573 39984 37110 40170 36357 38752 36037 39893 36998 40813 36380 38768 36893 39533 36720 39539 35537 40138 36288 39348 35767 40326 35914 39913 36498 33613 35863 41664 35696 40114 36250 41676 35591 41161 36520 40160 
23082 22629 23068 22658 22961 22786 22913 22775 22962 22425 23111 22658 23049 22663 22947 22773 23048 22532 23146 22674 23052 22744 23043 22803 23000 22556 23019 22681 23205 22680 22972 22992 22934 22876 22941 22682 23306 22649 22987 22733 23384 23014 22916 22686 22973 22600 23143 22742 22774 22812 22904 23053 22925 22672 23020 22837 22727 23080 22709 23093 22663 23084 22830 22795 22840 22955 22925 23035 22735 23003 22824 23045 22806 22957 22851 22979 22922 23021 22709 23127 22617 23167 22666 23008 22878 22828 22823 23415 22768 23123 22656 23211 22759 23179 22715 23145 22773 23019 22801 23150 22730 23100 22610 23209 22552 23164 22577 23119 22773 23035 22692 23151 22704 23143 22662 23224 22518 23237 22611 23134 22720 23017 22707 23005 22743 23061 22656 23181 22545 23319 22584 23233 22485 23116 22618 23078 22613 23085 22583 23048 22816 23040 22564 23153 22516 23226 22519 23053 22530 22910 23235 22827 23331 22942 22949 22880 22989 23046 23047 22932 23328 22823 23145 22871 23168 23120 23141 22768 23170 22829 23272 22941 23095 23193 23063 22736 23330 22727 23213 22893 22807 23174 23091 21268 21093 21296 21163 21396 21762 21617 21616 21453 21515 23800 23024 23386 22976 23182 23075 22954 23146 23075 22952 23273 23045 23122 23146 22983 23105 23076 23022 23279 22779 23220 22945 23169 23089 22998 23027 23122 22880 23304 22777 23306 22836 23166 22958 23119 22971 23153 23019 23205 22902 23328 22733 23272 23372 23324 22887 23264 22919 23040 22880 23040 22940 23184 22750 23331 22756 23403 22742 23277 22837 23351 22835 23206 22903 23140 22929 23159 22913 23271 22895 23181 22871 23257 22787 23232 22790 23372 22712 23381 22685 23276 22652 23392 22544 23324 22744 23420 22895 23377 22264 23280 22753 23357 22742 23370 22773 23360 22692 23317 22721 23304 22625 23375 22689 23330 22665 23342 22689 23284 22646 23254 22732 23281 22729 23300 22738 23382 22759 23258 22667 23279 22657 23368 22622 23221 22656 23354 22397 23248 22510 23211 22705 23276 22595 23217 22578 23202 22688 23243 22666 23212 22755 23133 22845 23177 22823 23157 22718 23137 22841 23117 22772 23423 22801 23169 22752 23030 22807 23080 22729 23129 22727 23235 22725 23200 22647 23186 22791 23244 22612 23130 22644 23112 22645 23193 22731 23079 22800 23052 22835 23040 22888 22039 22106 22286 22188 22294 21931 22298 21569 22046 21744 23582 22960 23122 22754 23214 22987 23121 23087 23117 22963 22936 22762 23046 22927 23280 22775 23322 22828 23024 22663 23033 22977 23093 23000 22981 22916 22932 22778 23086 22834 23284 22785 23217 22890 22973 22708 23041 23157 22960 23092 23137 22786 22909 22909 23164 22912 23205 22914 23079 22960 23022 22972 22919 23088 22824 23156 22871 23143 22648 23132 22613 23220 22816 23132 23040 23057 22999 22825 22941 23017 22978 23009 22912 23132 22664 23185 22791 23190 22903 23092 22926 23479 22936 22968 22956 23162 22869 23182 22793 23192 22662 23264 22820 23168 22985 23045 22909 22957 22924 23168 22950 23188 22754 23245 22731 23257 22803 23243 22865 23128 22877 22925 22933 23164 22712 23195 23132 23258 22579 23320 22742 23206 22809 23150 22803 22916 22862 23158 22755 23268 22756 23284 22534 23332 22650 23280 22745 23235 22791 23035 22764 23186 22809 23281 22701 23360 22642 23245 22736 23277 22745 23215 22801 22949 22848 23271 22728 23296 22619 23319 22622 23335 22712 23272 22703 23137 22613 23296 22632 23328 22821 23111 22712 23251 22677 23207 22713 23036 22745 23142 22725 22368 22320 22813 22120 22801 22343 22819 22324 22794 22241 23288 22677 23302 22656 23293 23000 23120 22555 23236 22712 23129 22648 23233 22704 23044 22727 23096 22748 23194 22624 23275 22650 23176 22661 23125 22672 23128 22770 23031 22839 23056 22664 23124 22731 23170 22616 23191 22728 23189 22679 23131 22695 23104 22685 23127 22781 23148 22689 23115 22818 23259 22772 23046 22799 23020 22716 23173 22759 23156 22774 23117 22700 23043 22556 23014 22886 23089 22920 23049 22973 23002 22944 22902 22953 22919 23002 22908 22880 23015 22918 22847 22853 22938 22817 23191 22926 22931 23030 22907 23081 22959 22730 22996 22810 23268 22810 22867 23019 23017 22769 23117 22685 22925 22909 22953 22662 22957 23013 22708 23192 22892 23032 22848 23137 22951 23043 22864 22992 22873 23092 23006 23145 22950 23069 22796 22966 23047 23021 22736 22818 22763 22996 22776 22967 22734 22846 22672 22832 22760 22996 22799 23143 22871 23188 22812 22980 22791 23196 22887 23181 22689 23013 22812 23193 22860 22934 22775 23233 22841 23017 22732 23203 22758 23175 22622 23149 22791 23223 22783 23171 22540 23637 22722 23278 22867 23245 22704 23161 22529 23168 22614 23121 22448 23040 22534 23051 22465 23076 22528 23039 22533 23735 22765 23226 22724 23230 22735 23089 22655 23154 22800 23259 22728 23204 22704 23273 22712 23340 22763 23293 22643 23259 22625 23129 22502 23200 22584 23068 22678 23260 22701 23232 22664 23147 22648 23095 22695 23106 22688 23205 22614 23104 22580 23121 22528 22977 22605 23296 22634 23168 22575 23128 22329 23040 22656 23244 22600 23205 22528 23205 22636 23186 22657 23120 22624 23156 22619 23195 22617 23097 22536 23120 22687 23090 22616 23086 22771 23114 22653 22976 22606 23153 22722 22973 22612 23152 22728 23109 22568 23136 22688 23114 22658 22976 22730 22967 22626 23090 22747 23014 22590 23078 22790 23011 22782 23120 22745 22929 22548 23181 22679 23056 22800 22992 22645 22808 22936 23086 22855 23098 22796 22919 22739 23093 22639 22753 22949 22961 22585 23181 22629 22690 22972 22860 22130 23173 22663 22852 22858 22949 22702 22930 22888 22896 22640 23031 22793 22929 22831 22907 22715 23129 22755 22877 22899 22870 22674 23124 22758 22809 22988 22827 22771 23105 23008 22824 22969 22763 22904 22852 22966 22695 23112 22609 23013 22885 22743 22887 23008 22637 22996 22831 22890 22644 23009 22766 22930 22571 22917 22703 22848 22849 22700 22994 22995 22787 23078 22752 23105 22851 22848 22853 23050 22746 23154 22669 23107 22789 22949 22942 22981 22735 23146 22696 23197 22717 23104 22864 22873 22828 23143 22672 23190 22734 23142 22646 23125 22831 22890 22785 23060 22720 23146 22580 23165 22663 23164 22798 22973 22811 23086 22672 23198 22506 23184 22878 23194 22606 23121 22752 23137 22702 23168 22633 23249 22467 23216 22912 23222 22666 23149 22777 22969 22721 23032 22679 23207 22612 23202 22496 23216 22589 23191 22601 23088 22542 23029 22569 23165 22621 23057 22669 23193 22599 23071 22664 23207 22528 23237 22656 23065 22742 23021 22733 23011 22630 23168 22586 23145 22563 23181 22981 23204 22528 23159 22552 23116 22563 22998 22537 22860 22593 23060 22673 23159 22656 23113 22629 23056 22760 23014 22565 23137 22583 23156 22563 22996 22631 22896 22682 23093 22684 23017 22716 23015 22748 22995 22633 23023 22576 23014 22838 23096 22560 22994 22548 23090 22656 23125 22718 22944 22633 22896 22727 23095 22875 22997 22852 22892 22843 23015 22665 23065 22553 23071 22720 23028 22639 23187 22679 23164 22677 23053 22758 22860 22649 22791 22704 22961 22873 22920 22964 22831 22967 22848 22953 22949 22873 22911 22592 22895 22763 23065 22965 23159 22637 23184 22947 22802 22967 22656 22983 22779 22998 22769 23018 22811 22984 22828 22986 22969 22770 22874 23014 22875 22965 22829 22927 22899 23016 22787 23072 22559 23073 22676 23111 22718 23065 22760 22975 22903 22817 22920 22743 22763 23056 22745 23135 22582 23125 22619 23145 22737 22957 22769 23030 22689 23150 22805 23150 22725 22929 22778 23060 22656 23188 22566 23144 22659 23031 22679 23157 22673 23219 22380 23302 22645 23093 22676 23383 22736 23240 22492 23260 22613 23133 22762 23095 22608 23192 22377 23192 22537 23140 22625 23147 22599 23110 22563 22992 22665 23067 22503 23111 22547 23047 22630 23054 22493 23045 22575 23093 22476 22939 22571 23138 22602 23048 22541 23022 22511 22989 23177 23058 22521 23081 22660 23105 22695 23055 22764 23016 22614 22997 22638 22985 22623 22965 22934 22811 22547 23093 22725 23054 22711 23033 22647 22993 22501 22818 22747 23127 22797 23040 22716 22832 22647 23206 22707 23031 22679 22797 22899 22844 22592 22824 22938 23029 22650 22857 22878 22984 22681 23405 22870 23077 22604 22943 22935 22877 22619 22908 22902 22863 22762 23108 22714 22887 22824 22817 23060 22580 23021 22883 22752 22815 23175 22696 23028 22944 22920 22866 23117 20589 20995 21101 21700 21144 21387 21145 21480 21339 21273 23136 23276 22808 23281 22857 23125 22897 23189 22723 23315 22519 23227 22791 23004 22823 23094 22765 22221 21828 22404 21845 22257 21886 22285 21762 22333 21595 24901 22778 23304 22752 23143 22777 23044 22809 23175 22650 23261 22502 23228 22597 23255 22546 23223 22016 22728 22107 22640 22137 22604 22280 22573 22275 23265 22766 23190 22508 23181 22413 23271 22548 23248 22509 23209 22565 23163 22535 23019 22667 23025 22730 22701 22338 22731 22441 22727 22416 22749 22396 22755 22700 23017 22573 23160 22516 23044 22693 23074 22614 23136 22647 23113 22688 23117 22683 23096 22657 22822 22397 22913 22401 23004 22465 22945 22400 22988 22430 23202 22607 23196 22623 23255 22593 23253 22519 23193 22576 23200 22626 23173 23200 23095 22775 22980 22644 22946 22800 22879 22844 22871 22981 22817 23018 22880 22928 22784 23053 22770 23028 22960 23051 22678 23044 22622 23054 22639 23145 22653 23168 22712 23034 22755 23056 22788 22994 22874 23409 22788 22935 22837 22871 22756 23057 22721 23107 22690 23208 22668 23172 22464 23216 22571 23206 22647 23136 22629 23145 22693 23088 22759 23050 22646 23028 22645 23189 22597 23244 22478 23232 22629 23242 22556 23112 22681 23214 22599 23075 22588 23208 22581 23056 22603 23056 22442 23150 22615 23067 22555 23096 22580 23013 22491 23149 22473 23072 22521 22978 22641 23053 22690 23031 22708 23106 22568 22963 22612 23105 22528 23134 22827 22951 22583 23053 22663 22972 22653 23187 22777 22999 22645 23033 22629 23088 22860 22971 22592 23012 22848 22912 22855 23091 22722 22793 22695 23180 22556 23148 22824 22887 22772 22934 22945 22808 22899 22962 22787 22884 22787 23083 22569 23048 22761 23020 22891 22973 22995 22715 22965 22712 23078 22597 22983 22843 22923 22779 22921 22866 22744 22929 22904 22829 23045 22727 23129 22824 23072 22615 22976 22820 23064 22796 22907 22801 22944 22829 22985 22756 23095 22669 23151 22487 23168 22649 23185 22632 23111 22701 23461 22694 22909 22720 23116 22679 23200 22593 23214 22604 23212 22604 23161 22635 23104 22822 23077 22763 23076 22544 23138 22549 23168 22592 23123 22630 23059 22695 22956 22716 23115 22669 22989 22541 23127 22444 23215 22578 23096 22465 23126 22569 23034 22560 23079 22735 23032 22661 23141 22507 22941 22747 23017 22641 23130 22562 23156 22549 23104 22477 23105 22636 23157 22586 23114 22566 23164 22553 23112 22589 23093 22695 23116 22668 23161 22600 23072 22681 22983 22710 22730 22756 22835 22908 22840 22892 22980 22602 23012 22642 23180 22632 22965 22712 22979 23043 22841 22773 22940 22694 23160 22752 22941 22672 22744 22784 22816 23015 22720 22867 22841 23009 22863 23060 22730 23014 22850 22778 22881 22944 22798 23027 22848 22809 22798 23128 22730 22840 22745 23184 22809 22897 22631 23025 22755 23108 22791 22975 22560 23127 22778 23155 22768 23077 22598 23025 22706 23213 22737 23133 22615 22936 22692 23224 22708 23123 22386 23129 22702 23202 22571 22954 22736 23125 22656 23004 22752 23297 22449 23168 22653 23248 22421 23281 22537 23049 22492 23129 22609 19764 19832 20489 20275 20704 20309 20734 21881 22199 25433 25173 24291 24577 23936 24316 19981 21107 21975 22360 22103 22424 21892 22438 21852 22344 24435 24312 24184 23138 22667 22417 22133 22720 22157 22736 22283 22631 22265 22541 22352 23202 22672 23104 22711 22954 22802 22520 22566 22706 22360 22775 22349 22728 22320 22813 22914 22951 22709 22788 22886 22860 22835 22747 22785 22767 22475 22687 22380 22869 22555 23080 22664 23209 22740 22920 22736 22779 22811 22797 22958 22871 23042 22767 23022 22867 23041 22820 22959 22871 22694 23018 22777 22876 22504 22903 23055 22867 22977 22856 23013 22839 23101 22785 23170 22583 23239 22597 23056 22642 23170 22659 23126 22695 23268 22617 23171 22695 23232 22617 23157 22695 23132 22737 23076 22749 23085 22758 23079 22712 23181 22722 23233 22701 23210 22729 23112 22791 23100 22785 23136 22665 23087 22855 23090 22796 23104 22768 23024 22685 23233 22554 23187 22477 23205 22651 23121 22665 23118 22547 23150 22653 23219 22588 23139 22523 23180 22523 23192 22566 23232 22480 23191 22514 23105 22623 23079 22647 23127 22517 23154 22572 23109 22649 23127 22626 
21724 22055 21643 22244 21477 22249 21685 21859 21816 22139 21701 22211 21489 22341 21648 22003 21692 22008 21737 22216 21392 22288 21649 22139 21757 22107 21661 22312 21293 22443 21479 22151 21774 21975 21734 22176 21602 22353 21364 22368 21552 22176 21802 22080 21608 22163 21512 22135 21547 22336 21486 22152 21427 21991 21584 22199 21650 22025 21529 22346 21401 22199 21332 22033 21552 22046 21617 22201 21353 22243 21447 22199 21605 22041 21536 22362 21734 22039 21645 21981 21627 22161 21569 22093 21510 21952 21625 21999 21733 22052 21543 22088 21558 22098 21583 22080 21626 22021 21700 21888 21671 22055 21382 22024 21488 22310 21607 22036 21437 21640 21959 21762 22004 21963 21617 21816 21645 22260 21425 22221 21591 21619 21901 21811 22073 21800 21886 21777 21504 22101 21648 22329 21581 21894 21757 21785 22001 21899 21704 21798 21909 21884 21764 21799 21859 21815 22030 21756 22219 21672 22230 21691 22094 21740 22088 21793 21926 22029 21745 21927 21864 21904 22111 21648 22308 21493 22350 21444 22213 21587 22177 21623 21999 21824 21947 21816 22096 21783 22174 21629 22268 21522 22280 21506 22311 21625 17443 17607 17081 17854 17299 17705 17483 22059 20136 20813 19763 20782 19937 20724 20097 20715 19881 20714 19950 20764 19852 20584 20180 20638 20162 20657 19923 20667 20028 20684 19972 20779 20199 20693 20086 20690 20245 20787 20082 20766 20153 20640 20281 20748 20203 20659 20137 20663 20067 20782 20027 20781 20109 20745 20090 20666 20215 20769 20250 20664 20120 20629 19929 20706 20668 20801 20113 20777 20280 20499 20272 20430 20369 20348 20445 20464 20578 20453 20555 20509 20510 20604 20377 20663 20237 20619 20228 20631 20463 20837 20855 21015 20250 20989 20263 20931 20302 21095 20231 20928 20155 20977 20312 20904 20147 20875 20215 20887 20103 20928 20192 20792 20151 20816 20273 20813 20224 20958 20183 20928 20499 20507 20758 20448 20793 20332 20796 20395 20742 20450 20719 20480 20644 20416 20667 20527 20557 20583 20330 20641 20585 20650 20537 20656 20496 20647 20353 20608 20453 20580 20579 20569 20594 20525 20564 20471 20850 20366 20817 20256 20933 20171 20947 20169 20839 20290 20976 20141 20888 20317 20962 20394 20800 20427 20783 20410 20784 20651 20960 20531 20625 20517 20649 20416 20720 20337 20951 20402 21043 19244 19936 18999 19896 18862 19541 18695 19132 18501 21145 20415 20888 20505 20790 20519 20933 20379 21036 20327 21156 20166 21104 20055 21120 20299 21042 20365 20983 20483 20743 20711 20832 20617 21059 20385 21105 20368 21170 20171 21242 20277 21137 20355 20992 20293 20886 20317 20998 20140 21064 20299 21027 20232 20977 20445 20933 20409 20944 20416 20784 20465 20704 20329 21019 20449 21185 20208 21107 20059 21080 20192 20979 20317 20928 20366 20923 20414 21122 20272 20852 20358 21148 20128 21056 20389 21031 20154 21005 20391 20848 20519 20841 20494 21013 20382 21058 20336 21079 20345 21099 20397 20939 20449 20922 20644 20905 20537 20923 20503 20848 20464 20992 20432 20997 20562 20886 20429 20877 20522 20900 20505 20945 20551 21026 20549 21116 20384 20984 20289 20864 20441 20800 20721 20949 20791 20777 20596 20636 20621 21003 20525 21091 20354 20930 20360 20959 20786 20781 20951 20960 20672 20732 20471 21159 20405 21190 20539 20736 20674 20748 20945 20791 20954 20699 20585 20950 20508 21248 20823 20957 20586 20759 20948 20851 20966 20690 20681 20871 20547 21211 20493 21058 20510 20900 20877 20825 21089 20869 20922 20336 21121 20128 20274 20208 20251 20184 20299 20145 20442 20006 20529 20395 21168 20538 20997 20768 20944 20999 20764 20970 20962 20910 21004 20760 21195 20760 21249 20602 21301 20656 21081 20786 21005 20855 21141 21017 20875 20892 21047 20733 21111 20752 21171 20695 21220 20576 21255 20673 21197 20742 21083 20886 20904 20859 20896 20885 21188 20848 21204 20684 21344 20602 21447 20688 21309 20444 21382 20615 21320 20699 21212 20811 21269 20809 21097 20778 21142 20770 21233 20762 21312 20721 21325 20608 21416 20660 21419 20660 21385 20647 21487 20676 21413 20520 21506 20632 21447 20630 21290 20685 21291 20785 21264 20699 21235 20593 21275 20590 21404 20561 21158 20845 21281 20677 21373 20598 21197 20779 21195 20578 21385 20577 21252 20421 21440 20603 21233 20536 21212 20746 21480 20729 21312 20608 21144 20521 21254 20545 21386 20657 21302 20818 21234 20640 21364 20573 21745 20645 21234 20682 21197 20700 21287 20852 21398 20642 21335 20688 21200 20832 21343 20644 21228 20728 21232 20772 21195 20788 21364 20885 21500 20729 21275 20809 21174 20593 21232 20848 21341 20919 21179 20769 21084 20803 21421 21036 21300 20630 21083 20855 21050 20873 21218 20467 20835 20769 21084 20749 21067 20843 20929 20674 21187 20853 21131 20771 20988 20807 20917 20737 21031 20732 20977 20846 21144 20951 21238 21336 21525 21388 21502 21323 21287 20869 20997 20906 21081 20814 21129 20961 21082 21210 21565 21226 21276 21402 21404 21316 21072 21013 20803 21425 21042 21505 21224 21332 20911 21394 20868 21216 21185 21338 21193 21223 21042 21115 21143 21248 21312 21409 21088 21049 20974 21242 21287 21441 21165 21259 20970 21456 21227 21367 20713 21401 21083 21543 20919 21219 21149 21453 21164 21416 20807 21574 21134 21318 20826 21488 21203 21593 20757 21457 21115 21603 20867 21428 21192 21512 20722 21478 21223 21485 20732 21536 21053 21442 20892 21704 21038 21347 20867 21641 20893 21350 21145 21672 20823 21602 21098 21466 20786 21781 20930 21390 20969 21781 20846 21597 21098 21367 20964 21632 21009 21573 21079 21564 20935 21588 21067 21430 21157 21604 20855 21774 21154 21365 20961 21862 20859 21808 20868 21538 21019 21608 20897 21698 20992 21518 20977 21616 20983 21600 20949 21468 21047 21419 21063 21576 20904 21435 21027 21543 20924 21491 20837 21792 20816 21623 20917 21584 20829 21664 20913 21665 20551 21347 20799 21285 20613 21499 20763 21235 20784 21409 21128 21504 20836 21625 21017 21579 21093 21543 21094 21482 21122 21580 21020 21604 21035 21392 21124 21529 21088 21510 21091 21701 20931 21457 21085 21582 21127 21446 21020 21555 20967 21669 20964 21559 21011 21778 21213 21431 21096 21505 21102 21692 20949 21559 21180 21309 21405 21357 21344 21518 21123 21838 21021 21703 21281 21207 21195 21618 21489 21312 21209 21312 21088 21786 20978 21825 21074 21243 21209 21319 21580 21359 21569 21440 21065 21577 21101 21822 21072 21607 21163 21298 21288 21343 21730 21230 21431 21351 21301 21391 21089 21891 21152 21745 21145 20976 21528 21309 21664 21197 21547 21335 21609 21390 21428 21422 21389 21497 21528 21376 21452 21408 21684 21077 21599 21300 21672 21322 21571 21473 21509 21530 21347 21511 21476 21364 21573 21392 21656 21169 21824 21043 21799 21030 21654 21546 21696 21273 21622 21287 21751 21316 21477 21393 21465 21446 21602 21396 21696 21233 21649 21079 21815 21168 21860 21040 21909 21114 21937 21083 22008 21014 21835 21159 21716 21357 21649 21321 21613 21289 21719 21291 21468 21360 21733 21207 21940 21133 21972 20970 22016 21002 21935 21159 21964 21360 21913 21033 21897 21144 21870 21280 21763 21098 21712 21104 21689 21113 21934 21152 21760 21256 21719 21382 21719 21143 21680 21043 21831 21107 21882 20997 21865 21045 21931 21064 21716 21120 21719 21171 21767 21264 21706 21208 21760 21095 21704 21091 21766 21054 21754 21203 21786 21237 21773 21245 21729 21132 21740 21346 21658 21305 21779 21276 21699 21362 21804 21236 21814 21277 21595 21315 21701 21072 21763 21238 21838 21358 21640 21599 21664 21309 21646 21235 21832 21423 21531 21643 21562 21160 21612 21320 21907 21226 21561 21635 21501 21564 21562 21203 21943 21278 21405 21671 21389 21541 21600 21233 21896 21266 21573 21744 21474 21191 22122 21398 21401 21836 21569 21388 21440 21788 21419 21709 21588 21795 21164 21777 21553 21867 21350 21528 21316 21699 21702 21862 21605 21872 21511 21749 21316 21431 21281 21519 21233 21685 21385 21817 21367 21933 21628 22044 21525 21920 21538 21831 21312 21652 21133 21733 21408 21819 21479 21984 21597 22004 21191 21697 21255 21979 21504 22007 21296 21872 21238 22144 21417 21953 21015 21931 21543 22073 21169 21749 21453 22045 21398 21837 21384 22160 21367 21705 21351 22170 21130 22080 21173 21760 21141 21949 21267 21911 21156 21946 21235 21698 21402 21776 21239 22022 21191 21831 21273 21873 21330 21877 21267 22059 21441 21891 19072 19515 18831 19656 19049 19472 19119 19775 19255 19749 21493 22008 21532 22277 21582 21899 21694 21953 21675 22134 21608 22173 21490 21816 21699 21840 21424 20759 20391 21104 20458 20512 20592 20528 20531 20661 21619 23730 21689 22416 21579 21789 21632 21893 22023 21707 21888 21844 21492 22055 21504 22226 21496 21957 20839 21016 20949 21360 21341 21021 21329 21113 21132 21793 21739 21797 21751 21794 22193 21710 21905 21703 21993 21568 22025 21492 22071 21684 22046 21548 21490 21128 21493 21165 21419 21230 21338 21377 21303 21224 21845 21697 21975 21677 22356 21739 21882 21715 21911 21707 21989 21659 21905 21528 22016 21562 22074 21186 21826 21225 21843 21254 21843 21173 21835 21273 21840 21401 22085 21446 22032 21415 22032 21536 22139 21487 22135 21556 22071 21433 21973 21419 22043 21520 22040 21444 22011 21560 21823 21378 22069 21205 22165 21280 22038 21278 22108 21255 22152 21347 22024 21217 21948 21270 21975 21284 22026 21258 21910 21461 21909 21607 21877 21527 21870 21516 21898 21568 21973 21376 21812 21547 22088 21463 21986 21344 22131 21532 21941 21360 21978 21402 21792 21677 21832 21719 21847 21923 22039 21524 21517 21353 22027 21351 22241 21317 22221 21502 21780 21484 21737 21868 21510 21899 21486 21728 21591 21648 21597 22016 21621 21911 21705 21604 21699 21746 21835 21779 21622 21952 21416 21902 21666 21971 21677 21877 21712 21652 21796 21767 21643 22001 21528 22060 21318 22039 21558 21989 21677 21911 21665 21943 21728 22040 21577 21958 21453 22145 21225 22234 21409 22055 21580 22048 21576 21924 21572 21961 21444 22157 21334 22300 21302 22165 21421 22077 21623 21287 21655 21812 21640 22064 21143 22233 21415 22075 21307 21978 21467 21991 21552 21825 21463 21900 21460 22144 21383 22233 21268 22165 21282 21979 21323 21972 21425 21924 21520 22173 21413 21815 21489 21957 21376 22115 20847 21929 21510 21901 21582 21824 21520 21981 21677 22092 21427 21911 21454 22121 21354 22144 21447 21943 21381 21824 21504 21817 21815 21824 21872 21767 21703 21808 21554 22167 21481 22288 21794 21892 21382 21679 21619 21742 22096 21948 21704 21624 21567 22033 21433 22244 21583 21859 21425 21612 21858 21816 21520 21794 22039 21432 22104 21385 22095 21597 21864 21849 21924 21858 21748 21785 21890 21710 22017 21591 21905 21521 22088 21320 22150 21308 22157 21569 22192 21637 22043 21552 22094 21529 22025 21588 22016 21607 21921 21605 22052 21639 22045 21495 22089 21457 22119 21545 22150 21454 22248 21334 22330 21271 22282 21399 22139 21629 21848 21634 21789 21762 21916 21484 22285 21304 22391 21463 22240 21534 22022 21382 22019 21401 22117 21466 22071 21575 22150 21393 22103 21395 22061 21501 21903 21377 22157 21304 22133 21351 22016 21526 21925 21357 22198 21569 22352 21588 22016 21556 21797 21628 21984 21586 21976 21657 21916 21637 22072 21456 21884 21413 21957 21664 22039 21473 21970 21457 21965 21606 22118 21766 22016 21618 21889 21517 22213 21677 21832 22000 21725 21926 21877 21491 21856 21900 22136 21464 21771 21921 21795 21489 21849 22100 21683 21420 22007 21953 21817 21403 22220 21648 18077 18104 18621 18757 18517 19057 18764 20548 20516 24481 23927 24373 23867 23623 23568 19462 20146 21251 20829 20856 21039 21091 20831 21377 23457 24218 23431 23591 22496 22264 21209 21744 20999 21691 20941 21637 21146 21327 21281 21437 21672 22343 21437 22353 21636 21767 21262 21798 21357 21575 21456 21881 21191 21922 21079 22436 21333 22387 21552 22374 21685 22038 21560 21957 21606 21828 21568 21760 21549 21993 21688 22286 21485 22219 21499 22224 21616 22309 21495 22247 21632 22108 21432 22272 21501 22180 21443 22246 21453 22274 21545 22136 21656 22081 21662 22132 21703 22040 21685 22098 21698 22107 21581 22032 21467 22030 21537 22101 21842 22188 21545 22188 21566 22076 21587 22159 21509 22075 21475 22103 21619 22159 21504 22119 21623 22020 21763 21919 21557 22005 21673 21936 21779 21799 21644 21825 21650 21672 21658 21651 21498 21773 21574 21833 21657 21851 21590 21828 21600 21825 21664 21827 21617 21775 21644 21904 21626 21910 22056 21465 21937 21491 22263 21621 22311 21635 22129 21591 22056 21717 22118 21637 22155 21715 22104 21704 22095 21700 22080 21717 22005 21732 22108 21630 22129 
