# Supplementary material for: An Active Feature Selection Strategy for DWT in Artificial Taste
Source: Hindawi journal article supplement (doi:10.1155/2018/9709505), 2018-01-01
Supplement: f1 [file 9709505.f1.zip › spirit-low-2.txt]

32278 29721 28822 28333 17252 19297 20647 21208 22031 22013 22531 22295 22565 22420 22747 22568 23029 22904 23217 22808 23259 22746 23169 22573 23296 22936 23429 23107 23507 23048 23328 22797 23188 22874 23558 22994 23605 22899 23360 22866 23254 22889 23501 23088 23655 22942 23444 22777 23530 23051 23752 23100 23706 22942 23394 22836 23639 23136 23773 23075 23609 22631 23456 22874 23789 22997 23776 22852 22899 22728 23556 23110 23749 23146 23618 23008 23241 22937 23566 23133 23772 23049 23607 22753 23643 23156 23768 22892 23600 22793 23654 22992 23666 22863 23385 22924 23656 22949 23563 22817 23484 22936 23586 23042 23600 23015 23352 22966 23664 22827 23563 22881 23456 23095 23709 22795 23452 22855 23744 22988 23474 22878 23503 22978 23525 22852 23505 23019 23544 23134 23560 22896 23493 23060 23521 22921 23520 23072 23626 22976 23476 23069 23677 22951 23511 22904 23689 23120 23525 22983 23565 23064 23431 23020 23395 23190 23425 23058 23463 23185 23508 22892 23445 23223 23459 23072 23493 23244 23377 22971 23578 23221 23360 22886 23656 23077 23277 23047 23641 23125 23209 23306 23389 23084 18767 20340 20526 20747 21541 21255 21305 21111 22041 21479 25637 25025 24480 24014 24053 24127 23768 23569 24034 23496 23393 23345 23832 23385 23399 23739 23381 23218 23117 22947 22868 22872 23308 22752 22960 22967 23224 23527 22994 23473 22925 23289 23111 23392 22711 23504 23080 23120 23065 23344 22923 23250 23220 23141 22881 23383 22956 23113 23192 23234 22940 23489 22988 23234 23220 23384 22806 23496 22908 23225 22994 23364 22872 23525 22823 23360 23080 23232 22821 23505 22927 23376 23017 22770 22929 23563 22753 23532 23077 23389 22967 23572 22707 23649 22929 23184 23088 23497 22774 23624 22821 23430 23053 23426 22855 23668 22758 23467 22945 23255 22859 23697 22688 23590 22944 23380 22873 23604 22529 23700 22857 23433 22986 23481 22796 23660 23041 23523 23045 23252 23004 23609 22605 23712 22865 23416 22990 23512 22808 23810 22300 23608 22711 23364 22769 23441 22762 23514 22739 23649 22869 23458 22946 23456 22675 23609 22888 23331 22869 23395 22752 23383 22876 23515 22693 23504 22761 23537 22740 23466 22547 23468 22738 23453 22792 23377 22746 23525 22802 23418 22788 23316 22898 23319 22999 23469 22784 23269 22920 23305 22904 23346 21112 22053 21768 22178 21981 22541 22018 22653 22078 26075 24516 24305 23675 24089 22987 23605 23216 23622 23119 23587 23184 23610 23152 23356 23242 23371 23012 23552 22869 23484 22963 23128 23289 23239 22755 23586 22977 23149 23226 23185 23134 23262 22994 23424 22950 23372 23217 23164 23098 23700 22997 23239 23438 23080 22985 23706 22894 23174 23371 23068 23097 23321 23002 23443 23030 23128 23441 23255 22956 23748 22976 23034 23461 23056 22952 23650 22976 23158 23373 23066 23072 23323 23600 22794 23479 23095 23192 23337 23409 22856 23520 22968 23488 23094 23342 23185 23524 23109 23184 23164 23283 23051 23398 23170 23318 23178 22916 23096 23448 22912 23488 23105 23159 23140 23488 22744 23624 23130 23192 23127 23595 22720 23504 23139 23212 23124 23594 22817 23573 23137 23463 22973 23616 23057 23388 23031 23735 22915 23485 22985 23590 22929 23385 22924 23625 22990 23488 22765 23565 23047 23671 22821 23321 22704 23680 23061 23655 22819 23380 22745 23706 22963 23736 22807 23492 22728 23593 23016 23671 22981 23515 23000 23416 22901 23641 23089 23562 22807 23286 22717 23712 23035 23712 21981 23521 22889 23575 22727 23609 22823 23723 21913 22759 22257 23120 22324 23056 22618 23136 22439 23009 23212 23452 22825 23472 22953 23515 22725 23620 22801 23444 22756 23543 22733 23637 22720 23471 22871 23489 22752 23489 22618 23472 22761 23468 22786 23548 22784 23222 22923 23473 22976 23408 22861 23318 22885 23424 22848 23353 22839 23326 22907 23298 22749 23410 22795 23314 22884 23364 22832 23281 22876 23511 22917 23377 22912 23371 22922 23306 23017 23817 23048 23287 23041 23105 22942 23329 22919 23433 22899 23526 23177 23433 22732 23251 22749 23376 23168 23324 23251 22580 23077 23100 22933 23486 22777 23666 22843 23489 22892 23192 23129 23269 23389 23285 23305 23206 22913 23621 22970 23598 23089 23136 23142 23174 23405 23589 23238 23176 23063 23778 23569 23331 22979 23125 23543 23168 23113 23111 23248 23220 23568 23336 23248 23170 23447 22882 23571 23024 23557 23218 23313 23164 23424 23131 23523 23080 23302 23204 23146 23246 23350 23277 23569 23080 23362 23348 23065 23307 23350 22953 23511 23104 23393 23239 23351 23084 23681 22693 23661 23144 23520 23200 23396 22841 23529 22788 23244 23048 23045 23040 23431 22793 23606 22932 23333 23072 23281 22881 23608 22764 23512 23008 22831 22708 23261 22341 23466 22577 23127 22892 23146 23054 23782 22760 23513 23096 23300 22874 23682 22574 23623 23030 23432 22935 23532 23090 23639 22743 23541 22933 23622 22722 23664 22850 23437 22941 23484 22834 23694 22791 23477 22921 23415 22818 23548 22977 23321 23028 23470 22823 23752 22759 23325 22934 23621 22716 23537 22916 23542 22704 23619 22535 23521 22874 23397 22784 23491 22738 23486 22889 23335 22770 23374 22912 23409 22746 23426 22689 23439 22856 23431 22728 23524 22670 23580 22795 23407 22680 23605 22605 23428 22848 23384 22752 23482 22775 23274 23572 23682 23159 23624 23112 23386 22630 23300 22773 23141 22959 23260 22637 23465 22650 23628 23076 23444 22997 23513 23018 23251 22809 23474 23109 23331 23053 23304 22881 23471 22933 23342 22851 23526 22928 23339 23066 23372 22905 23413 22898 23287 22949 23565 22897 23288 23203 23168 22985 23277 23187 23533 23008 23468 22848 23292 23080 23378 23215 23342 23298 23108 23051 23351 23024 23237 23023 23511 22895 23191 23410 22973 22930 23271 23292 23192 22953 23610 22889 23081 23431 22951 22928 23321 23225 23207 23088 23542 23264 23159 23431 23170 22877 23496 22733 22887 22949 23104 22800 23202 22857 22952 23223 22923 23064 22852 23570 23450 23831 23500 23730 23208 23588 23264 23370 23136 23564 23120 23277 23209 23431 22934 23221 23297 23218 23017 23541 23069 23077 23004 23434 22858 23128 23142 23355 22647 23428 23004 23192 22792 23616 22752 23310 23118 23272 22838 23840 23290 23626 23253 23793 22963 23479 23182 23596 22937 23714 23028 23372 23085 23707 22750 23574 23105 23383 22938 23712 22743 23628 23050 23538 22922 23782 22872 23494 23031 23575 22769 23686 23076 23477 23074 23754 22672 23694 23030 23350 23044 23772 22710 23848 22846 23556 23005 23334 23032 23515 22914 23703 22865 23620 22850 23591 22986 23449 23209 23160 22892 23374 22889 23597 22822 23738 22880 23721 22709 23385 22834 23480 22836 23393 22499 23533 22576 23361 22722 23409 23403 23914 23001 23810 22999 23660 23033 23906 23040 23435 22770 23418 22488 23412 22528 23473 23260 23749 22948 23648 22997 23552 22951 23575 22788 23698 22770 23747 22641 23622 22656 23307 22510 23268 22674 23269 22612 23317 22851 23458 22936 23213 22875 23194 22964 23269 22797 23301 22784 23445 22743 23388 22784 23412 22937 23619 23116 23518 23025 23386 22776 23453 23328 23459 22902 23601 22944 23510 22833 23467 22856 23405 22808 23533 22790 23480 22687 23452 22871 23382 22809 23360 23033 23257 23056 23191 22987 23526 22913 23559 22743 23260 23202 23323 23153 23161 22991 23402 22664 23289 23322 23252 22900 23500 22989 23312 23225 23233 22875 23576 23495 23247 23394 23415 22955 23662 22919 23200 23445 23073 22841 23363 23219 23051 23003 23624 22864 23211 23351 23367 23048 23203 23385 23040 22936 23271 23435 23138 23052 23461 23394 23021 23495 23205 23228 23119 23492 23031 23127 23021 23570 22924 23220 22981 23472 23063 23495 23186 23434 23130 23173 23078 23477 23278 23282 23109 23576 23232 23369 23080 23314 23208 23467 22810 23409 23149 23640 22990 23441 23078 23616 22983 23232 23043 23602 23185 23329 22955 23433 23081 23620 22981 23260 23002 23639 23194 23510 22804 23552 23232 23665 22923 23293 22909 23685 23138 23588 22766 23685 22904 23725 23106 23532 22824 23447 23046 23656 22903 23360 22456 23640 23019 23747 22765 23372 22737 23755 22983 23591 22650 23522 22925 23724 23143 23625 22721 23413 23018 23662 23192 23435 22669 23456 22993 23688 23018 23618 22570 23337 22776 23611 22746 23595 22727 23501 22728 23549 22761 23641 22808 23430 22744 23420 22920 23444 22800 23840 22809 23559 22936 23644 22885 23516 22688 23554 22752 23589 22784 23443 19236 20783 20684 21612 21191 21825 21175 22019 21414 27756 25506 24904 24134 24327 23027 23637 23264 23585 22934 23479 22967 23400 23096 23506 23013 23576 23024 21232 21335 22152 21864 22377 21971 22487 22051 22663 25355 25043 24177 24296 23568 23813 23298 23824 23232 23484 23207 23100 22709 23148 22992 23458 22784 21984 21627 22330 22208 22694 22626 22978 22421 22714 22576 25456 23769 23984 23411 23477 22796 23291 22824 23079 22736 23352 23829 23780 23141 23415 23008 23260 22065 22941 22854 22768 22481 22688 22612 22800 23090 23256 23639 23109 23225 23627 23404 23584 23226 23159 22733 22848 22807 23049 23096 22944 23117 23088 23408 22870 23224 22995 23280 22761 23012 22792 23312 23036 23401 23112 23136 22976 23485 23155 23511 23227 23201 22828 23355 23238 23484 23213 23381 22836 23367 23020 23524 23200 23387 22821 23381 22856 23560 23127 23481 22961 23120 22880 23459 23079 23681 22948 23255 22838 23280 23062 23691 22904 23382 22901 23470 23028 23596 23057 23485 22728 23400 23052 23625 23041 23353 22842 23453 23016 23613 22883 23383 22757 23629 23027 23653 22818 23455 22728 23716 22933 23542 22592 23544 23027 23648 22775 23457 22938 23636 22952 23259 22859 23697 22984 23268 22759 23752 22924 23272 22737 23767 22823 23411 22684 23840 22732 23432 22809 23447 22683 23500 22790 23477 22890 23592 22777 23552 22716 23512 22863 23296 22793 23356 22864 23407 22789 23425 22752 22896 22854 23400 22832 23367 22779 23504 22758 23548 22765 23493 22702 23444 22855 23436 22802 23401 22744 23268 22944 23256 22813 23424 22833 23474 22967 23331 22701 23223 22953 23305 22818 23425 22919 23592 22945 23284 22758 23278 22967 23463 22894 23416 22784 22804 22763 23397 22930 23399 22935 23287 22754 23301 22939 23399 22797 23556 23215 23506 22984 23283 22831 23224 22725 23104 23063 23460 23248 23259 23051 23092 22908 22995 22934 23500 23160 23162 22983 23200 22859 23539 23223 23048 22785 23104 23320 23392 22982 23127 22951 23589 22938 23009 22798 23489 23112 23175 22828 23593 23033 23010 22841 23638 22937 22734 23388 23219 22832 22968 23342 23248 23022 23136 23405 22647 23594 23032 23073 23111 23404 22775 23450 22990 23215 23152 22985 23104 23533 22968 23462 22896 23264 23236 23082 23186 23431 23062 23435 22904 23509 22970 23362 23064 23159 23049 23362 22926 23595 22656 23696 22760 23504 22964 23381 23067 23341 23171 23197 23057 23239 23004 23424 23045 23497 22864 23573 22890 23631 22857 23594 22903 23589 22817 23575 22677 23690 22790 23683 22656 23666 22767 23687 22784 23564 22931 23399 22904 23503 22982 23304 22922 23400 22858 23523 22771 23608 22531 23604 22608 23616 22721 23498 22998 23344 22936 23352 23025 23478 22633 23770 22700 23542 22938 23652 22936 23457 22745 23654 22816 23458 22795 23514 22880 23403 22792 23365 22677 23419 22855 23353 22841 23424 22784 23456 22773 23313 22845 23296 22629 23676 22786 23597 22748 23594 22617 23531 23114 23337 22866 23782 22739 23464 22617 23386 22907 23266 22759 23512 22629 23378 22904 23465 22856 23352 23006 23270 22754 23461 22812 23232 22737 23429 22812 18914 20087 21234 20871 21719 21387 21911 21568 21927 21570 26528 24919 24801 24059 24254 23430 20952 21286 22020 21841 22401 22038 22660 21877 22443 26226 25413 24052 24182 23770 23341 21607 22405 22348 22843 22801 22624 22549 22935 22892 22972 23660 23456 23311 23612 22895 22776 22528 23047 23075 22789 22509 22853 23117 23191 22528 23412 23095 23731 23466 23132 22961 22861 23159 23421 22853 23008 22742 22987 23233 23218 23138 23113 23029 23313 23406 23228 23031 23253 23416 23217 23277 22823 23360 22976 23470 23063 23305 22793 23255 23147 23479 23235 23176 22804 23273 23118 23376 23138 23320 22929 23008 23018 23502 23187 23332 22844 23299 22860 23538 23134 23549 22864 23192 22968 23429 23136 23469 22979 23384 22588 23353 23072 23544 23125 23488 22634 23444 22793 23584 23033 23534 22949 23311 22618 23539 23008 23657 22954 23478 22592 23812 22786 23625 22935 23569 22644 23355 22738 23578 22929 23696 22828 23472 22553 23442 22899 23652 22970 23536 22729 23325 22775 23474 22932 23604 22820 23352 22502 23303 22940 23648 22800 23503 22710 23552 22663 23399 22609 23516 22849 23496 22887 23254 22724 
21209 21435 20666 21229 21067 21211 20771 21431 21178 21032 20957 21300 21121 21005 21051 21452 20955 21125 21162 21481 20983 21240 21185 21351 20600 21420 21106 21248 20647 21582 20997 21139 21012 21527 20805 21127 20942 21435 21916 21229 21883 21322 22020 21546 21924 21635 21850 21472 21750 21568 22184 21703 21974 21600 21818 21539 21747 21840 22347 21685 21879 21581 21743 21511 21973 22128 22088 21643 21897 21237 21689 21927 22391 21905 21781 21465 21866 21595 22026 22107 22291 21613 21764 21609 21799 21904 22289 21867 21832 21477 21789 21784 22359 21953 21905 21636 21803 21833 22376 21817 21893 22041 21394 21824 22036 22288 21733 21959 21625 22283 21901 22156 21715 21967 21928 22313 22064 21984 21645 22211 22125 22198 21819 21830 22064 22292 21941 21843 21658 22282 21970 22123 21521 22031 21958 22373 21705 22050 21753 22404 21809 22066 21824 22458 21812 22064 21631 22288 21947 22333 21583 22145 21872 22380 21387 22213 21967 22421 21448 22219 22031 22381 21662 22347 21884 22333 21553 22333 21900 22314 21495 22528 21893 22257 21481 22503 21746 22128 21686 22609 21560 22189 21815 22530 14815 16016 15792 16360 15781 16920 16247 16832 16369 17301 23338 23431 23097 23347 22344 22967 22345 22775 21941 23046 22083 22528 21943 22583 21981 22717 21863 22453 20765 21735 20935 21635 20992 21546 20849 21671 20899 21461 20990 21806 20857 21425 21016 21667 20598 21692 20633 21573 20820 21684 20719 21565 20901 21596 20656 21664 20763 21504 20828 21525 20908 21607 20983 21476 21035 21409 20796 21577 20817 21355 21127 21585 20807 21612 20891 21242 21098 21407 20912 21557 20951 21429 20932 21489 21047 21452 20824 21608 20904 21402 21113 21376 21005 21647 20957 21271 21059 21385 20917 21561 20915 21249 21320 21312 20791 21635 20864 21304 21417 21185 20988 21373 21056 21464 21117 21343 21328 21470 20808 21648 20992 21126 21575 21159 20972 21690 20809 21477 21141 21209 21395 21312 21116 21947 20885 21079 21511 21179 20984 21628 20897 21376 21072 20508 21406 21248 20815 21768 21106 21218 21550 21009 21172 21427 21616 20981 21612 20899 21572 21135 21207 21396 21386 20845 21604 20871 21474 21376 21095 21409 21540 20935 21536 21214 21301 21312 21716 21169 21484 20878 21581 21273 21169 21249 21425 21040 21670 20712 21575 21219 21338 19085 18423 17897 18989 18483 18844 18762 18858 18540 19306 23815 23129 22603 22535 22280 21979 21251 22390 21645 22041 21750 21993 21437 22315 21260 22230 21703 21785 21682 21893 21096 22112 21190 21751 21409 22283 21207 22098 21029 21974 21277 21680 21332 22107 20935 22177 21001 21575 21217 21720 21093 22039 21147 21664 21238 21798 21168 22030 21018 22049 21372 21625 21399 22039 21000 22039 21088 21863 21120 21824 21074 21833 20337 21976 21041 21806 21282 21953 21169 21971 21152 21741 21271 21648 20905 21805 21093 21634 21191 21774 20985 21959 20806 21754 21216 21820 21315 22235 20983 21721 21043 21710 20996 21729 20877 21660 21056 21528 21197 21801 21175 21760 21136 21608 21229 21651 20977 21770 21105 21700 21217 21657 21155 21721 21216 21430 21341 21575 21185 21691 21152 21459 21071 21866 21037 21678 21249 22049 20967 21888 20871 21768 21191 21607 20913 21614 21349 21457 21024 21330 21273 21684 21025 21390 20965 21394 21549 21559 21117 21320 21177 21431 21511 21748 21095 21387 21150 21217 21495 21833 21088 21378 21096 21569 20933 21558 21701 21698 20969 21167 21153 21693 21636 21357 20910 21399 21464 22069 21141 21293 21133 21871 19777 19671 19664 20677 20019 20096 20112 20449 20849 20320 21401 21309 21543 20773 21604 21170 21579 21197 21560 21091 21473 21269 21380 21110 21623 20997 21472 21269 21149 21381 21087 21145 21385 20893 21481 20887 21597 20919 21565 20987 21523 21165 21415 21133 21345 21197 21085 21104 21196 21271 21360 21202 21443 21344 21205 21165 21255 21186 21360 21148 21173 21201 21433 21207 21476 21064 21364 20987 21637 20949 21656 20869 21697 20846 21702 20817 21708 20760 21659 20950 21449 21067 21365 21072 21355 21008 21423 20956 21722 20805 21786 20553 21733 20647 21724 20866 21582 21286 21664 21399 21668 21432 21803 21186 22055 21068 22081 21016 22033 21324 21925 21344 21687 20928 21856 20999 21980 20828 21921 21222 21780 21189 21635 21076 22038 21179 21793 21120 21694 21280 21664 21399 21624 21063 22037 21027 21773 21137 21781 21059 21810 21185 21901 20867 22005 20897 21820 21129 21769 21036 21822 21053 21798 21034 21750 21159 21712 21098 21883 21026 21747 21168 21720 21278 21824 21126 21929 21166 21719 21262 21745 21252 21704 20957 21425 20874 21416 21043 21218 20860 21531 20855 21376 20919 21416 20992 21409 20792 21667 20776 21422 20143 20779 20196 20903 20169 20797 20068 20640 20531 20720 20901 21690 20812 21335 21198 21174 21003 21521 20983 21351 21165 21318 21013 21370 20912 21243 20968 21136 21013 21401 20797 21568 20943 21189 21338 21201 20940 21597 20875 21203 21244 21289 20942 21516 21096 21025 21281 21484 20827 21371 21390 21575 20904 21671 21449 21193 21531 21227 20973 21838 20969 21108 21512 21073 20960 21728 20892 21079 21466 20853 21661 21181 21056 21212 21490 20830 21485 21140 21415 20928 21632 20931 21287 21431 21142 21113 21499 21014 21221 21366 21232 21268 21507 21211 21017 21337 22370 21760 22264 21929 21767 21582 21521 20653 21393 21028 21385 20757 21546 20903 21184 21527 21965 21317 21845 21674 21489 20845 21869 21221 21700 21318 21799 20935 21884 21201 21456 21199 21831 21093 21696 21323 21740 20899 21946 21264 21455 21136 21920 21141 21411 21295 21969 20878 21913 21345 21729 21013 21955 21198 21619 21117 22068 20860 21830 21189 21992 20742 21851 21339 21546 21088 21899 21138 21731 21193 21844 20850 21765 21239 21613 20890 22055 20932 21621 21232 21744 20826 21778 21147 21524 20840 21845 20888 21861 20882 21780 21078 21669 21094 21457 20553 21316 20588 21068 20533 21081 20528 21207 20592 21111 20931 21613 21852 22263 21591 22420 20855 22039 21303 22089 21129 22083 21161 22297 21104 21840 20907 21716 21088 21754 21044 21623 21127 21520 20807 21655 20711 21376 20753 21415 20599 21370 20909 21277 20745 21357 20740 21307 20820 21303 21748 22251 21680 22117 21600 22144 21325 21912 21415 21968 21341 21921 21415 21915 21313 21920 21350 21777 21356 21717 21194 22000 21155 21608 21484 21753 21184 21865 21233 21600 21440 21730 21290 21830 21555 21637 21489 21933 21434 21621 21741 21706 21189 21863 21365 21614 21480 21612 21865 21594 21336 21704 21189 22028 21063 21840 21159 21688 21221 21351 21565 21223 21689 21127 21420 21312 20950 21671 20977 21804 20934 21061 21301 21116 21144 21479 20813 21627 20791 21029 21399 21056 21984 22461 21739 22213 21613 21734 21991 21737 21356 21542 21108 21410 21063 20935 21398 20732 22489 21319 22167 21465 22168 21753 21984 21777 21470 21836 21902 21676 21735 21260 21644 20864 21312 21143 21138 21153 21017 21316 21634 20974 21725 20880 21668 21063 21339 21222 21193 21158 21453 20903 21730 20577 21737 20807 21509 21221 21735 21714 21265 21421 22056 21435 21716 21347 21909 21254 21924 21178 21917 21236 21754 21095 21796 21124 21700 21180 21672 21358 21840 21455 21518 21334 21588 21120 21924 21001 21927 21029 21797 21258 21495 21367 21680 21045 21947 20848 21979 21276 21596 21196 21795 21172 22021 21101 21769 21265 21611 21059 21940 21222 21656 21362 21680 21089 22050 21295 21771 21280 21800 20904 21902 21299 21689 21146 22084 21172 21757 20984 21899 21004 21816 21019 21920 21066 21649 21192 21926 20981 21784 21243 21880 21117 21818 21418 21791 21101 21801 21197 21729 21026 21825 21211 21741 21088 21939 21032 21588 20956 21889 21095 21793 20941 21870 21229 21607 20899 21861 21207 21879 21037 21701 21234 21847 21172 21596 21216 21924 21249 22174 21245 21783 21223 21781 21188 21751 21368 21748 21260 21707 21193 21746 21241 21945 21163 21661 21284 21795 21143 21657 21167 21901 21302 21645 21038 21735 21401 21769 21115 21664 21327 21851 21470 21598 21174 21509 21223 21897 21414 21364 21125 21436 21400 21764 21259 21188 21132 21582 21684 21682 21027 21661 21219 21430 21680 21814 21147 21312 21086 21525 21764 21755 21070 21359 21180 21575 21876 21659 20980 21353 21161 21484 21744 21568 21130 21186 21137 21463 21605 21647 20868 21236 21039 21334 21417 21044 21243 21299 21843 21603 21854 21312 21517 21184 21705 21401 21815 21350 21401 21173 15771 16300 17025 16825 16977 16814 17132 17225 17645 24659 24024 23181 23192 22862 22224 21768 22042 21328 21842 21501 22018 21643 22152 21276 21682 21207 18144 17716 18501 18210 18843 18218 18796 18416 19141 18707 24139 23024 23009 22472 22833 22222 22873 22125 22371 21625 22231 21436 21857 21221 21765 20786 21342 19153 19478 19211 20072 19464 20199 19243 19920 19296 20212 22473 22983 21699 21959 20800 21289 20807 21417 20968 21716 20935 22159 21571 21912 21265 22144 21596 20496 19928 20622 19719 20575 20091 20845 19922 21003 20033 22226 20793 21917 21677 22324 21473 21643 20745 21126 20641 21208 20544 21467 20680 21319 21241 21600 20330 21139 20511 21284 20385 21221 20355 21085 20459 21703 20866 21576 21047 21602 20718 21725 21021 21577 20849 21593 20725 21635 21141 21632 20883 21538 20886 21509 21155 21580 20967 21527 20905 21456 20919 21561 21088 21463 20951 21452 21016 21696 21159 21462 20451 21361 20917 21376 21143 21549 20877 21483 20881 21458 21094 21552 20769 21561 20919 21448 21255 21427 20980 21398 21064 21741 21111 21216 20938 21376 21212 21786 20961 21232 21213 21324 21639 21383 20919 21301 20968 21731 21107 21460 20904 21609 21544 21238 21006 21192 21607 21187 20952 21354 21550 21152 20811 21440 21397 21192 21036 21832 20942 21244 21586 21115 20784 21728 21062 21242 21553 21497 21152 21227 21408 21019 21574 21480 21129 21299 21399 21161 21496 20880 21576 20971 21436 21080 21248 21171 21060 21290 21232 21195 21467 20888 21494 21230 21217 21358 21318 21070 21578 21293 21419 21124 21275 21048 21650 20995 21268 21127 21770 21370 21398 21206 21617 21179 21135 20880 21669 21162 21745 20989 21334 20921 21647 21165 21644 21025 21479 20663 21393 20881 21650 21292 21746 21038 21595 20892 21398 20874 21536 21018 21793 21082 21845 21079 21524 20946 21401 20764 21703 21049 21760 21177 21787 20782 21444 20741 21806 21169 21904 21061 21728 20630 21577 21239 21757 20891 21313 21019 21798 21149 21405 20929 21877 21018 21648 20770 21840 20921 21622 20872 21734 20923 21348 21001 21649 20649 21633 20955 21614 20864 21752 20864 21504 21056 21437 20888 21768 20753 21685 20932 21549 20709 21825 20702 21612 20796 21488 20943 21447 20601 21656 20763 21558 20869 21602 21034 21604 20818 21704 21032 21509 20978 21478 20960 21468 21143 21470 21032 21415 21011 21568 20796 21625 20937 21558 20992 21398 20958 21528 21100 21344 21006 21332 21064 21408 21022 21504 20952 21681 20800 21476 20709 21584 20836 21457 20833 21483 20835 21531 20753 21392 20853 21225 21100 21309 21393 21277 21316 21175 21457 21282 21260 21230 21028 21402 20933 21613 20813 21876 21007 21461 20963 21264 21462 21273 21387 21190 20979 21652 20958 21592 20905 21194 21323 21309 21548 21120 21046 21721 20706 21515 21299 21158 21553 21007 20866 21600 20881 21428 20919 21240 21306 20727 21496 21375 21352 21158 21443 21034 21793 21034 21289 21239 21448 21031 21506 21047 21299 21330 21239 21088 21646 21020 20616 21430 21431 21053 21452 21133 21284 21240 21637 20962 21368 21257 21406 20933 21593 21220 21056 20821 21707 21021 21430 15127 16572 16365 17059 17001 17565 16988 16779 17394 17905 24097 24045 23351 23507 22368 22664 17189 18265 17788 18497 18358 19115 18343 18762 18420 25003 23439 23405 22657 23306 21120 18715 19532 20553 19835 20454 19441 20514 19970 20669 21083 21847 21239 21971 20956 21349 19929 20810 20283 20676 19863 20818 20333 20974 20233 20572 21121 21888 21546 21646 20771 21077 20653 21365 20496 21107 20414 21051 20392 21298 20420 21481 20795 21381 20836 21578 20768 21225 20649 21587 20950 21504 20864 22008 20666 21470 20927 21527 20696 21519 20777 21523 20981 21665 20601 21408 20657 21533 21060 21505 20599 21481 20857 21351 20944 21552 20823 21523 20859 21302 20775 21621 20947 21280 20183 21334 20670 21447 21109 21440 20699 21363 20759 21335 20855 21470 20778 21248 20919 21424 20978 21592 20857 21367 20991 21355 21059 21566 21200 21411 20768 21306 20823 21305 21304 21335 20901 21363 20786 21275 21064 21495 21165 21142 20812 21056 20765 21116 21269 21593 20884 21216 20703 21019 20796 21428 21205 21106 20847 21099 20800 21258 21360 21355 20681 21127 20871 21052 21104 21733 21404 21143 21236 21081 21419 
21030 21394 20960 21306 20976 21496 21088 21435 20963 21446 20951 21393 20985 21307 20915 21388 21057 21392 21035 21541 21026 21289 21048 21471 20970 21316 20923 21462 20839 21417 21096 21467 20960 21412 21120 21413 20999 21449 21081 21334 21028 21465 20961 21362 21047 21476 20960 21362 21147 21265 21051 21408 21187 21297 21093 21597 21129 21300 21318 21343 21084 21661 21129 21325 21378 21211 21187 21521 21079 21580 20933 21295 21162 21313 21388 21752 21393 21536 21175 21660 21417 21778 21393 21744 21464 21623 21346 21817 21287 21641 21289 21696 21336 21763 21309 21669 21373 21643 21354 21788 21326 21679 21456 21639 21473 21702 21195 21667 21309 21803 21299 21780 21178 21622 21395 21701 21238 21687 21365 21780 21321 21686 21258 21635 21357 21744 21383 21607 21267 21781 21425 21636 21387 21652 21347 21670 21361 21813 21492 21700 21334 21636 21381 21709 21397 21557 21317 21765 21387 21691 21177 21721 21431 21725 21325 21814 21383 21809 21324 21657 21439 21754 21405 21687 21447 21713 21552 21721 21493 21619 21274 21795 21361 21653 21188 21810 21449 21691 21516 21687 21441 21623 21666 21611 17303 17985 17700 17800 17639 18251 17880 17970 18052 22849 22016 21907 21941 21840 21499 21848 21625 21540 21207 21945 21293 21263 21637 21579 21276 21523 21544 21072 20689 21410 20957 21211 21093 21120 21029 20684 21075 21146 21114 21143 21269 21168 21224 21057 21111 21045 21375 21040 21037 21133 21159 21032 21201 21245 20948 21157 21313 21120 21213 21289 21041 21219 21371 21094 21207 21207 21254 21028 21306 20980 21265 21101 21116 21101 21303 21063 21248 21195 21115 20992 21366 20897 21328 21002 21070 21090 21293 20839 21379 20979 21272 21057 21288 21039 21402 20914 21312 21156 21180 21121 21504 21108 21320 21060 21297 21029 21480 20763 21475 21040 21196 21101 21366 20869 21447 20844 21404 21095 21329 20984 21527 20804 21432 21056 21104 21046 21463 20848 21388 20918 21356 21059 21399 21026 21523 20848 21388 20985 21329 21063 21460 20946 21425 20837 21506 20928 21381 20941 21367 20885 21383 20885 21318 20892 21288 21077 21313 21040 21474 21041 21371 21008 21351 20824 21378 20801 21515 20945 21638 20987 21424 20853 21389 20823 21410 20960 21333 20938 21405 20944 21368 20907 21317 21012 21233 20937 21392 20847 21358 20970 21208 19104 19536 19224 19619 19349 19673 19278 19665 19495 19663 21025 22113 21623 21813 21565 21306 21337 21633 21258 21371 21248 21465 21216 21413 21164 21632 21263 21437 21199 21373 20901 21497 20960 21529 21206 21303 21248 21398 21053 21468 21162 21522 21359 21421 21069 21524 21080 21216 21313 21280 21082 21472 21016 21445 21175 21260 21427 21293 20992 21575 21098 21468 21424 21352 20992 21573 21138 21303 21325 21184 21266 21473 21040 21556 21165 21264 21447 21324 21124 21639 21124 21444 21351 21446 21360 21289 21454 21329 21313 21379 21329 21307 21429 21166 21472 21285 21588 21398 21370 21015 21287 21328 21252 21394 21313 21057 21445 21317 21431 21404 21368 21120 21456 21147 21276 21403 21316 21243 21509 21162 21448 21309 21412 21213 21385 21180 21474 21291 21383 21104 21537 21297 21553 21302 21578 21252 21412 21321 21550 21120 21297 21229 21453 21164 21349 21193 21529 21207 21483 21244 21421 21210 21561 21207 21464 20939 21495 21208 21613 21140 21432 20908 21515 21197 21559 21187 21431 21024 21428 21181 21552 21253 21613 21049 21403 20889 21543 21221 21528 21134 21406 20934 21548 21197 21711 21111 21428 21131 21495 20967 21615 21200 20686 20292 20759 20525 20814 20438 20809 20496 20871 21153 21264 20968 21282 20995 21517 20831 21365 20971 21296 20864 21443 20929 21264 21031 21443 20983 21463 21030 21340 20901 21355 20998 21271 21003 21361 20849 21404 20893 21469 20968 21440 20973 21349 20984 21285 21005 21322 20939 21485 21027 20899 20974 21783 21073 21173 20969 21395 21032 21162 21000 21269 20993 21299 20992 21360 21026 21347 20985 21497 20944 21426 20905 21569 21022 21319 20933 21397 20936 21380 21190 21229 21220 21134 21056 21180 21046 21252 21100 21492 20956 21464 20812 21335 20861 21296 21243 21170 21464 21181 21238 21293 21207 21633 21176 21710 20929 21371 21232 21269 21504 21360 21260 21340 21124 21571 21159 21582 21093 21408 21493 21303 21425 21376 21173 21681 21127 21656 21056 21474 21233 21357 21377 21178 21533 21309 21412 21354 21451 21366 21541 21312 21449 21402 21386 21460 21321 21351 21437 21440 21477 21350 21363 21411 21271 21441 21454 20988 21531 21325 21400 21371 21370 21365 21527 21312 21532 21374 21221 21409 21606 21131 21603 21232 21313 21335 21092 21097 21452 21061 21496 21185 21257 21235 21372 21012 21439 20974 21481 21250 21385 21140 20946 20939 21121 20781 20979 20782 21037 20632 21160 20604 21429 21116 21314 21164 21435 21002 21467 21063 21143 21178 21491 20980 21501 21024 21389 21102 21397 20944 21584 20936 21445 21139 21309 21065 21568 20963 21411 21080 21275 21095 21547 20930 21406 21180 21468 20976 21482 21053 21417 21109 21415 20983 21628 21069 21452 21002 21495 20881 21430 21085 21355 20928 21618 20934 21397 21058 21456 21092 21523 20864 21414 21124 21268 21072 21445 20807 21384 21047 21542 20905 21405 20993 21337 21024 21443 20937 21459 20976 21427 20899 21588 20929 21423 21056 21328 20987 21985 21542 21685 21402 21571 21256 21221 21061 21258 20899 21512 21013 21423 21043 21253 21458 21622 21343 21625 21278 21441 20955 21551 21191 21464 21056 21672 20935 21536 21190 21434 21109 21492 21157 21483 21123 21539 21181 21544 21176 21379 21037 21477 21272 21425 21184 21568 21083 21458 21332 21424 21160 21427 21328 21356 21248 21560 21225 21527 21162 21556 21074 21495 21424 21332 21104 21384 21414 21381 21187 21568 21209 21347 21283 21493 21034 21351 21415 21248 21093 21667 21077 21345 21335 21246 21062 21420 21329 21363 21129 21665 21100 21340 21507 21280 20979 21335 20945 21054 20994 21053 21007 21125 21267 20839 21465 21159 21867 21622 21845 21486 21586 21621 21508 21261 21527 21513 21527 21400 21522 21356 21195 21303 21550 21207 21440 21367 21312 21145 21357 21327 21178 21147 21456 21100 21385 21181 21355 20956 21402 21217 21146 21150 21388 21154 21797 21627 21736 21969 21703 21448 21447 21444 21673 21415 21450 21413 21615 21251 21768 21399 21556 21398 21658 21113 21648 21449 21442 21399 21616 21145 21626 21314 21626 21238 21643 21317 21559 21299 21715 21165 21728 21265 21965 21387 21676 21328 21783 21240 21497 21388 21551 21270 21671 21159 21713 21125 21704 21255 21719 21159 21636 21165 21669 21175 21658 21021 21563 21157 21524 21271 21385 21181 21574 21191 21691 21131 21520 21007 21451 20992 21399 21068 21296 20889 21451 21874 22094 21579 21820 21478 21732 21206 21671 21257 21654 21121 21239 21160 21211 21045 21371 20841 22000 21212 21815 21240 21916 21248 21752 21208 21558 21341 21657 21213 21591 21127 21581 20867 21395 20925 21385 21003 21448 21442 21543 21012 21511 21085 21557 20983 21484 21009 21317 21120 21369 21053 21363 21081 21415 20940 21504 21147 21536 21348 21421 21214 21469 21287 21527 21148 21592 21321 21536 21248 21715 21251 21479 21251 21477 21257 21411 21144 21504 21225 21973 21309 21418 21287 21546 21184 21666 21403 21511 21141 21399 21445 21728 21318 21621 21141 21614 21113 21534 21371 21488 21265 21638 21124 21420 21373 21463 21245 21653 21144 21491 21248 21408 21190 21685 21237 21447 21537 21454 21307 21655 21312 21461 21454 21401 21121 21509 21537 21677 21146 21609 21240 21467 21296 21692 21159 21360 21441 21635 21248 21449 21542 21441 21337 21671 21441 21408 21469 21574 21530 21353 21516 21468 21636 20750 21556 21504 21391 20660 21472 21476 21552 21179 21428 21540 21528 21191 21402 21616 21550 21417 21277 21446 21624 21448 21351 21293 21617 21410 21434 21363 21625 21397 21592 21300 21575 21504 21591 21449 21344 21320 21669 21323 21592 21336 21515 21477 21632 21302 21678 21280 21728 21305 21605 21144 21585 21408 21754 21346 21432 21301 21628 21376 21647 21232 21672 21332 21696 21344 21737 21159 21580 21256 21744 21353 21624 21005 21516 21308 21752 21240 21530 21184 21646 21352 21683 21332 21493 21253 21751 21218 21775 21276 21444 21160 21712 21271 21672 21306 21513 21185 21660 21250 21609 21216 21601 21058 21543 21111 21644 21255 21472 21551 21463 21088 21608 21196 21469 21224 21645 21095 21730 21253 21578 21089 21524 21135 21573 21284 21594 21280 18149 18040 18698 18275 18821 18201 18737 18310 18851 23060 22736 21838 22138 21679 21433 21111 21556 21083 21350 21128 21543 21134 21480 21271 21526 21096 19323 18951 19514 19377 19824 19484 19696 19480 19783 19437 22689 21996 22112 21478 21741 21395 21677 21349 21709 21222 21555 21107 21221 20945 21302 21113 21161 19904 20087 19963 20395 20168 20523 20313 20335 20071 20512 21794 21710 21339 21499 21265 21051 20825 21028 20883 21074 21121 21970 21507 21413 21116 21363 21193 20532 20680 20903 20480 20728 20549 20816 20647 21063 22225 21452 21253 21890 21558 21656 21529 21472 21025 21083 20871 21193 21174 21233 21111 21133 21544 21273 21005 20973 21188 21024 21021 20784 21038 21084 21187 21251 21260 21043 21303 21273 21365 21309 21427 21294 21164 21222 21368 21277 21436 21232 21120 21219 21318 21325 21475 21212 21223 20960 21264 21237 21431 21249 21489 21046 21383 21157 21431 21353 21403 21085 21719 21152 21585 21172 21472 21098 21457 21123 21553 21312 21426 21200 21239 21117 21469 21190 21480 20970 21159 21133 21601 21116 21479 21009 21413 21184 21528 21132 21435 20912 21604 21214 21592 21067 21289 21064 21537 21248 21425 20472 21587 21249 21546 20955 21424 21168 21648 20938 21493 21088 21551 20955 21481 21136 21545 20986 21568 21177 21332 21089 21568 20951 21549 21053 21550 21029 21626 21037 21550 20944 21415 21115 21400 21207 21288 20986 21464 21011 21602 20981 21485 20953 21590 21063 21473 21043 21303 21050 21403 21175 21508 20877 21572 21006 21464 21111 21337 21009 21437 21042 21463 21133 21418 21137 21381 21021 21306 21077 21429 21097 21384 21168 21454 21013 21435 21027 21504 21073 21377 21061 21920 21056 21536 21107 21383 21069 21365 21030 21371 21030 21479 21152 21488 21181 21448 21093 21415 21022 21330 21217 21573 21358 21415 21072 21370 21039 21184 21004 21420 21293 21472 21197 21351 21111 21463 21084 21590 21386 21481 21063 21255 20994 21433 21369 21396 21033 21284 21416 21506 21143 21255 21018 21703 21095 21239 21064 21580 21220 21281 21012 21571 21207 21249 21107 21583 21144 21160 21401 21341 21224 21271 21465 21336 21240 21326 21402 21210 21384 21088 21314 21388 21376 21212 21475 21250 21496 21255 21177 21379 21236 21332 21504 21255 21520 21255 21336 21379 21148 21393 21346 21268 21531 21199 21471 21212 21506 21367 21376 21304 21411 21276 21315 21276 21469 21081 21559 21008 21565 21199 21549 21108 21464 21144 21481 21313 21404 21315 21328 21271 21245 21285 21379 21310 21499 21209 21529 21271 21329 21317 21329 21234 21319 21252 21395 21229 21547 21233 21551 21130 21549 20999 21597 20950 21689 21026 21585 21168 21459 21280 21366 21260 21396 21211 21557 21115 21669 21008 21632 21177 21481 21218 21514 21287 21621 21044 21719 20912 21734 21159 21496 21063 21600 20985 21618 20965 21504 21181 21504 21101 21505 20993 21581 20925 21529 21210 21652 21089 21625 21447 21485 21080 21411 21016 21596 21043 21547 21164 21434 21099 21558 20995 21481 21121 21416 21057 21549 21515 21543 21184 21504 21173 21632 20977 21319 21104 21548 20943 21499 21248 21433 20919 21422 21241 21616 17627 18575 18441 18761 18477 18880 18614 18944 18685 19020 22752 22671 21877 22011 21608 18188 18810 19389 19247 19624 19376 19738 19522 19685 19525 23143 22330 22008 21683 21056 20987 20215 20214 20608 20433 20762 20247 20622 20425 20885 21185 21398 21203 21370 21296 21169 20344 20833 20797 21100 20503 20745 20661 21142 20777 20984 21986 21217 21529 21539 21068 20886 20753 21220 21028 20976 20737 21103 20879 21324 20985 21141 21028 21264 21336 21475 21042 21194 21381 21369 21272 21075 21163 21121 21256 21232 21365 21136 21117 21222 21481 21305 21287 21217 21088 21174 21345 21299 21395 21251 21080 21095 21297 21322 21376 21211 21152 21480 21324 21292 21442 21159 21373 20984 21329 21197 21483 21248 21471 21173 21289 21126 21443 21184 21478 21120 21322 21267 21388 21255 21456 21184 21402 20967 21150 21127 21531 21220 21504 21112 21304 21067 21521 21255 21545 21069 21339 21000 21397 21120 21543 21056 21461 21034 21340 21031 21452 21150 21496 21175 21441 21048 21457 21224 21513 21157 21385 20935 21287 20974 21588 20976 21559 21054 21317 20905 21395 21064 21393 21132 21469 20981 21346 20918 21460 
38272 41755 37408 40984 37575 42936 38781 42508 37648 42426 37602 41747 37935 41107 37008 41767 38452 41678 38434 33381 37701 40784 38349 42972 37773 40997 37234 42597 36416 42069 38964 42869 37452 41966 39015 42162 37977 42503 38913 41394 38100 42711 37543 41524 38551 42745 37449 41536 39624 40487 38560 41863 40006 40896 38979 34232 38979 40883 41248 41779 38925 34919 39011 41377 41712 40368 39937 33063 38540 33880 36920 41000 39672 41040 41963 40748 41650 42736 40407 40781 39875 41521 39159 39912 39790 41559 40514 39353 38769 41266 40339 33194 40172 39104 33321 40996 42256 42000 42217 40289 41970 40641 32804 40420 42546 40808 42855 39252 43023 39366 42112 39008 39652 34478 41685 35424 40320 35301 41545 36086 41076 35217 40272 34504 41531 35780 41712 34471 40352 36156 42051 34513 41689 34708 41301 35013 41411 36592 42836 35360 41185 34464 41517 35617 41793 33763 40896 35968 41764 35424 39704 35594 42288 35873 41220 36596 41754 36483 41127 34848 42457 36138 42021 35372 42419 35512 33164 35281 42868 34588 40448 36331 41478 34819 39593 36375 42416 35446 32870 34944 42130 34716 34546 34180 38872 36357 33160 34094 32693 39042 35353 36037 36928 37088 38316 37494 37888 36576 43104 37000 34440 33044 39937 38048 40960 40853 34580 33751 40441 33209 33060 38144 34362 41738 37666 40182 38936 38873 38117 34361 38441 39361 39156 39456 40635 39540 40264 38387 39180 38320 42041 38189 38288 39312 39668 38085 39912 40739 37312 39456 41036 38951 40304 40908 38280 40217 41987 39004 40209 40258 40448 38057 41010 37720 40400 39160 39200 39096 41120 38661 40130 40110 39304 37457 41672 36721 40989 37848 38633 38709 40993 36295 41580 37803 40486 38400 40715 38498 41988 36937 40800 39500 39880 39009 32694 38657 41076 38457 40811 38193 42780 35452 42649 38212 39958 39131 41760 36457 42483 36352 41920 39122 41216 37780 33249 35339 42089 38353 38795 38306 42775 36219 41716 37073 41537 38560 42048 38085 33097 35785 41680 37906 41157 38698 42565 37328 42119 36236 32648 36581 41604 37444 41783 36651 41755 36672 41044 36741 40631 38760 40997 38136 42669 38336 41893 37780 41605 35952 41444 35657 32950 36912 34308 37688 42012 36437 41832 36143 41856 37395 41286 37275 42072 37200 41600 37041 41072 37891 40288 37233 41600 36535 41622 37703 39986 38018 32403 38920 33557 40389 34311 39832 34085 31956 33977 37737 39643 34601 36312 33701 40791 41476 34453 40232 41961 40280 42816 40194 42216 39777 34264 40497 42656 40384 42024 36898 43008 37456 33165 39815 41137 40236 42016 38670 42760 39760 33047 41571 42480 38863 33063 38360 39977 41065 40628 38800 42603 38021 42438 40012 40529 42386 41168 37587 33840 38703 42748 42289 41649 37571 33731 38936 41088 41481 39740 40475 42808 38227 33463 39496 40344 42682 41431 39139 34601 38825 42360 41832 42644 41672 40979 42809 41392 41137 41820 41347 41280 42475 39880 42672 40965 33996 41688 41936 38151 40880 41180 40388 41868 41154 38425 42470 41323 42583 42232 41856 39000 42441 39667 40728 42216 41192 40760 33060 39303 42449 41373 42165 40440 41894 39957 42780 41152 41991 38958 33249 40561 33526 40726 33936 40036 42088 41356 33732 38631 40833 40577 42796 39803 41600 40059 33311 39936 43089 40745 42444 40310 33752 39959 42682 37456 43110 40227 34512 39019 42282 36984 33024 39817 33769 39607 42503 38023 42183 40088 33414 40128 34491 38167 42089 36752 33398 40023 33175 39072 42153 37257 33417 39840 35651 39041 42240 39459 43223 37824 34496 39618 34547 40488 35277 32432 35601 42169 35895 31766 36128 39255 40341 37532 40569 37716 33104 35961 41590 37811 40679 36161 42295 37120 40250 38272 42423 37996 42752 38284 41408 36864 41609 37816 40660 37936 41549 36282 41902 36892 42777 37646 42156 37881 41491 37800 40733 37997 41144 37392 42992 38248 36802 37634 36048 38419 39732 37622 41824 38176 39574 37681 40544 37632 40886 37536 41400 38072 41456 37905 43066 37251 42109 36953 33544 37877 41216 37225 41866 37187 41553 40008 40539 40256 39428 38252 39816 38357 40234 39043 42956 37608 42554 35994 41328 36621 40620 40732 39670 42676 40167 40555 41072 40320 34392 39473 35521 36882 41809 40357 40675 32791 41164 40600 41527 39146 33760 39411 34016 38667 41856 43235 41313 42331 41672 39872 35013 39073 34662 38044 42660 40515 41832 41751 39936 33453 40928 42139 41753 42807 41931 33561 40653 42634 42180 41984 42736 41401 41781 42712 42392 43080 41744 41859 42257 40886 42440 42881 38056 33324 41075 42002 42068 41952 41902 33456 40612 33363 41654 40452 42080 34377 39093 34197 39993 41064 41579 38882 38943 42587 38614 43013 39925 40504 40533 41920 37933 42612 37880 42880 40429 41883 39357 37196 37150 38918 35511 37543 35450 38155 33618 39233 33565 42065 39312 41015 39716 42560 37912 42806 38760 39488 39813 43079 37800 43224 38023 41912 39221 41968 37202 33674 36812 42377 39452 41220 38640 33525 37227 42020 38771 40749 39073 33581 36718 42043 39968 42828 37652 42864 38696 42197 39232 42281 37991 34518 38485 42548 37917 43141 36622 42228 39036 41745 36986 34202 36937 41842 38454 42384 38916 33144 35851 41988 39152 40505 38488 42468 35956 41544 38544 33371 36561 42032 37680 41352 37956 42392 37333 42568 37637 42240 36864 33806 36743 42350 38368 41088 38009 38336 33341 34861 41789 33883 40098 40336 38528 40422 36784 32783 37620 42388 38432 40385 42624 34620 41456 34621 40597 42407 37655 33670 39744 42657 38390 34828 37091 33036 39607 42420 39255 42976 39714 43088 39296 33376 39681 33373 39424 41728 38454 42855 40723 42288 39786 33573 38608 42506 41420 42200 39633 42349 41270 41756 40272 33636 40075 33344 39331 33518 38293 43136 42307 41393 38944 41698 42288 41911 39997 33580 39899 41545 40890 43164 38354 41632 42409 40336 38954 34864 38508 41366 41588 40823 38569 42225 41367 41817 39330 34768 38795 41425 33046 40240 37756 41408 37298 38444 37536 38454 38005 39089 40576 36293 42617 39804 37296 34368 36688 42947 34053 34208 32592 40284 33369 32717 32968 41565 33159 41344 40181 41169 33730 39957 42280 42023 41057 39521 41779 41608 39908 39556 42460 39128 41799 40066 41773 37573 41944 40275 39441 39565 41884 39512 36332 34493 35449 37913 35367 42233 42784 42583 35144 42055 42711 42340 34715 40144 35888 41901 33651 41675 34887 38962 34437 42305 42504 42245 34352 39175 34520 40780 34586 40268 34720 40941 33843 40707 35544 39579 35488 40272 38300 41889 35139 40883 36294 40304 43200 42064 33883 40349 35085 39461 35387 38962 35241 40327 35688 39489 34400 39523 34933 39653 34795 37968 33760 39292 33076 40423 41889 40080 33858 39760 35339 39112 32923 37748 42584 37602 41995 38700 40731 36679 42544 37303 39576 34001 36384 42724 35776 39957 35072 40269 34740 38800 40616 39554 40288 38384 41891 36295 38346 40176 36675 40328 37696 40079 35916 39896 33688 41301 34864 40108 34182 39016 34013 36084 41760 37298 41716 37999 42380 42516 33705 37560 33000 38618 33593 37607 42883 37938 41130 38971 41819 38656 41696 38866 42259 37376 32605 39211 33135 41143 42480 40470 42980 41104 33419 39181 33973 40960 33230 39860 35512 40192 43056 40544 42970 40647 42197 39433 32713 40052 38284 41174 42304 41080 33554 39386 34768 41895 33225 39066 42073 42664 35591 41001 34528 39144 34438 38940 33389 41632 42953 40642 34560 38832 42224 42113 42968 40900 34780 39095 43040 40321 41956 40033 35178 40310 42671 33436 42416 41316 34920 40688 42780 42902 42200 39147 32976 32936 34795 39197 34292 40206 42915 40941 35313 39496 41504 42483 34604 39973 42589 33591 42038 41565 35141 42140 42032 43072 33994 32985 41272 33184 42464 34541 35040 33318 32376 41722 34289 42368 42937 33558 39655 42272 33443 32860 39705 42044 34329 33384 41896 40992 42592 34569 42194 41825 41136 34410 41754 42541 41888 34656 41728 34109 40628 33994 32421 33808 42256 41482 41225 35021 41124 34067 41032 33240 42560 34395 40752 35173 40352 35523 40880 34323 39077 33876 41610 36099 41248 42409 41161 34665 41266 34920 40027 34872 41053 35142 41090 35865 39493 33924 40093 35734 41434 34508 37728 32981 40786 35962 40288 33304 39363 34711 41268 35195 41056 43176 40592 36128 40000 36257 40553 42448 39632 35287 40532 34932 40856 33105 39478 34828 40032 34343 39800 34112 38112 33464 38944 34584 40295 42673 33879 42528 38777 34166 39753 42933 40416 34771 38805 35552 40236 33898 38536 33034 39181 33792 40424 34131 40283 38407 37060 33555 39285 35058 38520 34048 39552 35435 39271 35877 36748 40002 35280 42204 39355 33536 38599 41536 39200 33520 39091 42817 40896 33275 38571 40576 36592 32256 40540 35792 31813 34032 31559 35148 41561 35520 38455 39552 42915 36112 41781 35252 41368 35612 40125 33624 38809 40273 37251 40901 39235 39591 36596 38752 37585 41908 39645 32624 40768 41600 38795 32129 35849 35346 41345 43355 40664 38560 35996 37863 36468 38412 38968 38169 32873 41817 39308 41723 40080 32579 33963 36624 31558 34592 32594 35347 33871 38353 40896 42656 40592 37259 33541 34381 33016 42272 38105 38828 36461 39819 39780 40376 39264 39345 33346 40376 37973 37691 39721 37877 38071 35222 38156 38738 39852 40396 40560 38344 41088 40757 41844 41338 42438 41160 39736 40320 41765 40946 42544 40384 38950 40242 41224 41474 42983 40373 40476 37356 40260 40549 42548 40413 43008 38508 41856 39659 42501 41770 42273 39045 35568 39114 33876 39384 42624 39089 42536 39252 33496 40624 42278 39977 40672 39372 42933 40067 42887 37744 39672 39361 34101 38953 42985 37930 42105 39771 33175 38955 42498 36891 34023 40056 34011 38413 40842 38512 33227 39848 42240 42977 34183 40023 33508 37243 41986 39616 34480 36973 42953 38795 33728 37257 42839 39256 33475 37573 33456 39536 41267 38822 33536 37187 33527 38272 33562 37864 34455 38104 33573 36815 42153 39394 41927 40348 40832 37867 42567 38037 34039 37523 42993 37572 33950 38368 42681 38448 41085 38467 42096 39988 32902 36317 33544 37658 42540 39371 41436 37872 42503 38324 42764 39516 42232 39329 41776 38249 41039 38779 42341 39090 41706 39593 42727 38084 42457 38216 32651 38252 41557 38599 37388 38144 33088 38776 41846 38824 41743 38234 41888 38233 42949 39459 42849 40128 42496 39048 42245 38285 41176 40240 33862 41490 42388 38583 41787 38566 39660 37835 42169 41165 42724 40287 41729 39328 42821 38953 34012 41545 43063 38784 40500 37621 42317 41984 41995 38313 40662 42178 32969 39176 40512 38036 35367 38840 40584 38475 33873 39943 40679 37888 33699 39959 40288 39104 34133 39063 39463 42039 41719 40365 40773 42844 41482 40554 41432 42135 40284 41771 38747 41009 41940 41642 40309 42919 40388 43121 40695 39882 41760 40517 41315 32808 40211 32985 40213 41356 41831 39579 41833 41543 40613 33448 39909 43066 40375 32882 41552 41611 41065 42224 40842 41216 40793 43008 38924 33745 37387 33770 39957 33664 38720 42615 39446 42964 41198 42165 41269 41217 40816 40794 40880 41818 41339 43360 40354 33295 40435 41293 41280 41325 40449 41345 40401 41986 40640 33641 40080 33776 38947 33619 37579 34166 37113 35101 37767 33813 39229 42664 40712 41849 40627 41926 40401 33708 39015 34917 37475 34163 39558 42966 40329 33069 40614 34530 37993 35587 36552 35598 39488 43030 38784 33960 37561 34224 37324 32604 39646 32713 38800 32781 37280 33925 36951 33140 39862 34638 38528 34482 42265 43252 38821 42101 37994 34070 38060 33523 39367 42417 39213 33632 37424 42843 39152 42101 38480 33587 32768 33200 39356 32668 39451 34238 37377 41188 38922 33499 37204 43139 40330 42457 37239 42264 40704 34249 32530 32215 30356 34050 31068 35201 32657 35848 33717 37056 35968 35266 37134 38805 34162 38275 35047 41047 39905 33605 40506 34906 32133 34088 32248 40297 42070 38825 35095 38034 37852 40213 40211 33282 41898 35282 40213 33770 41949 36673 39645 41984 40205 41856 40861 39671 41396 36059 35616 38812 32320 34645 33937 39092 35368 37504 38311 40105 33308 33056 38309 36528 34853 39974 38043 37429 34688 38993 36676 41125 37888 39296 38016 40273 41373 42964 38342 39911 41803 41940 40688 38725 39685 39016 40352 40297 41824 39200 39309 40294 43013 41249 41028 40229 38693 39719 41446 41076 42028 40499 38704 38968 40853 41291 41608 40384 39341 42752 41434 41003 42454 39803 42000 37810 41153 40197 43117 40320 43088 39923 40896 39218 42476 39795 42935 39050 41216 40640 41937 40656 42520 39794 42054 37768 39551 39285 33384 39905 32737 38732 40921 38731 33024 40216 33509 38436 41484 37765 41898 39000 33521 37973 42628 38317 41409 38330 42556 39701 43062 40033 42391 38421 42521 40392 33101 39265 41824 37357 40835 37824 33861 37241 33653 38276 41122 36888 41811 38555 41792 39360 42924 37900 41348 37074 42464 
23368 23015 23302 22882 23501 22842 23335 22855 23508 22764 23367 22740 23384 22728 23347 22805 23392 22898 23432 22960 23191 22866 23257 22989 23164 22922 23394 22933 23306 22833 23398 22852 23333 22892 23385 22805 23367 22961 23485 22903 23425 23017 23343 22962 23388 22966 23445 23022 23419 22992 23303 23116 23223 23081 23498 23017 23280 23127 23385 22977 23373 23212 23264 23091 23218 22965 23481 22919 23312 23373 23270 23131 23175 23047 23499 23073 23552 22951 23517 22976 23651 23096 23594 23016 23495 23633 23437 22883 23308 23052 23332 23096 23272 23024 23403 23314 23220 23080 23321 23250 23239 23232 23319 23187 23322 23233 23316 23383 23319 23248 23336 23355 23260 23387 23194 23353 23208 23514 23132 23465 22985 23595 23116 23488 23207 23373 23245 23332 23260 23421 23163 23605 22884 23510 23061 23545 23179 23431 23154 23194 23120 23573 22968 23709 23059 23613 23216 23415 23224 23368 23735 23683 23820 23348 23760 23340 23788 23456 23689 23325 23671 23415 23664 22944 23710 23539 23721 23489 23872 23479 23633 23324 23729 23444 23556 23377 23773 23476 23621 23623 23622 23376 23544 18320 19895 20098 20673 20473 20626 20456 21007 20632 20721 25568 24636 24007 24132 24059 23911 23560 24064 23616 23681 23668 23791 23514 23520 23786 23641 23500 23780 22951 23097 22913 23439 23091 23009 23243 23299 23240 23112 23223 23020 23164 23169 23345 22898 23301 23054 23009 23093 23415 22799 23241 23132 23111 23109 23250 23031 23052 23097 23156 22894 23301 23033 23053 23159 23233 22892 23233 22976 23122 23020 23242 22857 23341 22864 23209 23040 23232 22776 23286 22999 23204 22976 23245 23024 23354 22857 23278 23024 23260 22944 23354 22717 23332 23040 23195 23016 23408 22733 23389 22912 23237 23095 23420 22780 23437 22848 23267 22932 23287 22927 23437 22858 23380 22984 23403 22909 23492 22811 23415 22892 23212 22981 23365 22846 23399 22780 23239 22937 23323 22983 23437 22701 23341 22971 23232 22951 23360 22743 23490 22797 23371 22758 23354 22820 23356 22757 23458 22801 23375 22842 23343 22888 23278 22857 23372 22803 23147 22888 23215 22816 23312 22763 23410 22742 23341 22870 23344 22827 23351 22657 23317 22845 23275 22753 23256 22279 23383 22850 23273 22850 23260 22903 23283 22872 23370 22802 23387 22890 23253 22687 23385 22805 21168 21108 21664 21404 21721 21361 21825 21449 21920 21644 24242 23557 24142 23498 23527 23165 23589 23272 23520 23225 23660 23196 23570 23215 23570 23152 23693 23206 23346 23129 23262 23164 23367 22878 23525 23109 23128 23300 23401 22923 23423 23028 23245 23252 23248 23244 23277 22991 23644 23016 23253 23360 23290 23289 23581 23148 23239 23383 23239 22912 23444 23060 23255 23123 23207 23298 23286 23543 23579 23138 23328 23385 23265 22985 23468 23067 23321 23483 23259 23075 23555 23153 23131 23232 23254 23115 23324 23340 22977 23429 22969 23336 23137 23325 23090 23400 23344 23255 23096 23161 23084 23280 23107 23339 23169 23236 23187 23312 23139 23388 23280 23251 23113 23394 23472 23383 23219 23360 23101 23495 22945 23443 23217 23200 23165 23488 23200 23472 23221 23285 23113 23520 23109 23345 23135 23540 23026 23373 23191 23515 22957 23320 23092 23488 22997 23272 22933 23504 23085 23400 22916 23291 22959 23529 23072 23405 22857 23418 23050 23528 23046 23376 22871 23355 22951 23595 23052 23449 22921 23254 22964 23468 23000 23419 22960 23318 22786 23288 22945 23511 23067 23352 22706 23383 22965 23646 22904 23384 23015 23437 22888 22034 22016 22548 22036 22633 22335 22762 21782 22717 22441 23355 22904 23320 22889 23390 22779 23406 22821 23316 22794 23249 22793 23456 22784 23209 22881 23372 22810 23320 22816 23338 22734 23246 22863 23373 22884 23181 22849 23239 22897 23306 22793 23200 22836 23212 23025 23286 22769 23300 22822 23297 22817 23280 22796 23344 22736 23316 22862 23365 22838 23304 22891 23353 22823 23232 22812 23159 22796 23221 22875 23191 22935 23209 22960 23143 23053 23117 22998 22982 22957 23083 23046 23238 22905 23245 22920 23201 22966 23127 22791 23139 23136 23040 23188 22983 23017 22953 23047 23388 23033 23602 23588 23388 23022 23288 23364 23238 23329 23374 22997 23495 23048 23553 23417 23292 23148 23300 23406 23303 23152 23309 23160 23538 23121 23272 23086 23342 23538 23328 23447 23028 23444 23249 23381 23296 23368 23150 23539 23073 23636 23151 23374 23225 23291 23271 23387 23232 23456 23180 23285 23248 23276 23269 23385 23090 23483 23176 23303 23313 23252 23160 23434 23040 23504 23225 23170 23222 23448 23092 23579 23127 23488 23239 23336 23085 23224 23001 23300 22919 23297 23017 23208 22967 23342 22737 23368 22893 23175 23046 23333 23025 23351 22362 22763 22597 22807 22542 22982 22357 22901 22553 23831 23040 23287 22967 23446 22868 23235 22913 23319 22817 23447 22763 23327 22937 23068 22856 23424 22633 23366 22937 23175 22856 23441 22680 23429 23025 23277 22956 23430 22703 23502 22977 23024 22880 23492 22741 23336 22912 23226 22920 23384 22804 23313 23019 23374 22724 23400 22810 23396 22791 23383 22775 23303 22922 23287 22786 23393 22821 23260 22933 23302 22790 23371 23350 23306 22899 23246 22836 23381 22694 23356 22784 23401 22813 23369 22720 23264 22825 23264 22715 23367 22889 23273 22748 23409 22423 24085 23481 23296 23356 23777 23418 23508 22879 23185 22784 23287 22768 23139 22864 23272 22711 23593 23147 23429 23117 23616 22949 23265 23047 23368 22929 23408 23104 23339 23011 23430 23150 23456 23194 23351 23020 23399 23118 23342 23105 23452 22916 23377 23194 23357 23033 23340 23247 23230 23168 23540 22928 23296 23093 23404 23309 23356 23276 23195 23040 23335 23229 23274 23114 23531 23045 23239 23161 23471 23022 23236 23232 23272 23057 23452 22920 23236 23168 23392 23008 23176 23332 23144 23058 23570 22988 23335 23360 23138 23034 23202 23271 23186 23040 23645 22935 22863 23146 22679 23117 22893 22794 22839 23051 22767 22816 23104 23877 23443 23910 23636 23686 23207 23674 23467 23604 23448 23688 23248 23360 23308 23392 23572 23503 23352 23111 23331 23352 23060 23241 23142 23299 22826 23286 23012 23156 22887 23268 22976 23415 23033 23268 22706 23272 23028 23744 23465 23801 23412 23768 23468 23736 23396 23752 23378 23517 23269 23766 23200 23581 23369 23649 23207 23716 23274 23671 23398 23596 23366 23745 23322 23591 23335 23706 23081 23618 23236 23511 23155 23762 23041 23625 23251 23658 23175 23680 23117 23601 23172 23597 22999 23810 23042 23823 23121 23591 23299 23440 23304 23463 23209 23345 23176 23533 23255 23559 23168 23509 23040 23571 22976 23658 22998 23501 23191 23240 23020 23355 22880 23488 22836 23469 22729 23494 22824 23321 22710 24231 23522 24032 23384 23946 23415 23767 23369 23700 23174 23500 23137 23335 22917 23243 22806 23964 23476 23696 23386 23761 23296 23776 23289 23735 23252 23780 23225 23469 23059 23938 22937 23389 22792 23309 22706 23373 22720 23389 22966 23433 23024 23377 22861 23348 23004 23404 22852 23321 22842 23110 22947 23191 22928 23286 23036 23338 23305 23536 23139 23507 23073 23485 23260 23400 23000 23448 23099 23453 23110 23481 22993 23372 23016 23400 23105 23409 23038 23452 23040 23523 23666 23451 23026 23475 23280 23336 23232 23331 23144 23493 23076 23415 22953 23407 23383 23505 23140 23566 23040 23357 23127 23349 23302 23313 23213 23559 23097 23332 23336 23267 23041 23580 23171 23405 23271 23669 23091 23329 23418 23658 23232 23681 23044 23389 23340 23529 23076 23340 23415 23136 23168 23503 23381 23584 23192 23599 23279 23431 23236 23666 23054 23403 23575 23395 23329 23358 23641 23234 23362 23284 23716 23196 23536 23467 23652 23238 23440 23340 23467 23448 23524 23343 23573 23376 23333 23301 23560 23350 23375 23308 23616 23447 23520 23242 23530 23394 23608 23106 23526 23304 23637 23191 23708 23227 23754 23324 23429 22505 23639 23348 23582 23159 23719 23237 23746 23266 23599 23333 23585 23319 23642 23104 23511 23255 23629 23336 23617 23097 23594 23244 23669 23189 23505 23406 23657 23244 23713 23245 23538 23040 23658 23143 23656 23010 23460 23106 23693 23216 23585 22947 23601 23165 23621 23287 23657 23099 23659 23212 23755 23177 23648 23001 23568 23189 23672 23241 23623 22905 23677 23084 23695 22980 23577 22877 23465 23023 23470 23104 23577 22973 23606 23030 23433 23040 23544 23000 23556 23107 23506 23204 23616 23116 23323 23058 23511 23092 23760 22967 19105 20596 20338 20076 20690 20233 20763 20352 20780 20373 25640 24643 24583 24030 23666 23254 23832 23332 23568 23416 23671 23289 23621 23384 23648 23213 23665 21009 21062 20969 21619 21232 21641 21308 21719 21334 21762 24441 24421 23860 24309 23627 23980 23614 24024 23641 23765 23614 23441 23047 23328 23069 23489 22896 21888 21687 22135 21907 22202 22104 22434 21967 22225 24005 23781 23471 23478 23268 23332 22784 23247 22793 23143 22817 23286 23841 23660 23269 23439 23303 23626 22353 22690 22572 22456 22540 22570 22452 22504 22632 23968 23175 23530 23750 23809 23552 23510 23253 23101 22947 22934 23072 23227 23065 22996 23101 22858 22925 22848 23069 22915 23079 22672 23128 22837 23101 22997 23213 23186 23127 23209 23213 23271 23415 23118 23259 23073 23258 23308 23465 23252 23214 23020 23283 23097 23485 23287 23336 23005 23120 23013 23552 23092 23513 23119 23328 23113 23499 23164 23514 23120 23300 22985 23477 23186 23469 23061 23247 23104 23453 23136 23595 23127 23392 22823 23344 23162 23589 23075 23369 23005 23547 23196 23552 23040 23449 23020 23607 23105 23507 22883 23502 23077 23647 23044 23516 23145 23543 23104 23552 22913 23405 23157 23676 23047 23332 23092 23571 23057 23360 23002 23641 23049 23286 23076 23635 22947 23528 22924 23673 22727 23418 23013 23583 22957 23545 22901 23473 23030 23408 23054 23288 22953 23373 23076 23400 22972 23360 22999 23312 22950 23347 22947 23399 22894 23368 22874 23441 22873 23536 22871 23353 22932 23382 23025 23393 22848 23584 22885 23218 23095 23420 22961 23443 23046 23325 23105 23431 22964 23347 23030 23394 22985 23287 22985 23351 22985 23343 22955 23450 23081 23380 23035 23353 22855 23395 23037 23521 23000 23380 22918 23352 22801 23237 22968 23383 23118 23383 23136 23351 22993 23188 22886 23248 23160 23480 23201 23320 23095 23258 23061 23334 22985 23440 23307 23322 23092 23303 23035 23232 23314 23557 22999 23330 22973 23315 23323 23214 23041 23221 23348 23492 23128 23328 23094 23535 23081 23138 22960 23537 23016 23121 23025 23529 23064 23278 23340 23237 23074 23165 23271 23448 23180 23278 23324 22943 23431 23224 23217 23094 23413 23049 23429 23136 23131 23333 23284 23189 23285 23033 23289 23206 23136 23282 23351 23110 23357 23105 23408 23102 23381 23271 23250 23257 23342 23188 23496 22914 23432 23161 23462 23211 23384 23208 23290 23238 23220 23209 23388 23116 23456 23148 23537 22967 23485 22910 23536 22924 23499 23120 23581 23053 23496 23080 23571 23056 23513 23033 23457 23108 23536 23045 23625 23022 23559 23071 23620 22887 23606 22948 23592 22986 23495 23051 23505 23095 23361 23080 23434 23111 23511 23020 23607 23047 23617 22903 23523 23104 23571 23111 23405 23052 23577 23002 23600 22949 23664 23060 23360 22913 23623 22963 23650 22848 23594 22976 23481 22907 23511 22912 23519 22806 23491 23063 23351 23001 23418 22976 23390 23024 23440 23001 23437 22850 23427 22857 23385 22972 23417 22835 23543 22861 23469 22993 23357 22897 23487 23011 23420 22965 23454 22952 23442 23040 23360 22973 23444 23072 23393 22944 23509 22833 23269 22980 23533 23060 19605 19843 20294 20099 20610 20397 20780 20442 20839 25922 25260 24521 24704 24208 24294 20084 21037 20981 21395 21144 21560 21336 21726 21450 21664 25017 24864 24387 24433 23117 22413 22010 22503 22263 22619 22313 22285 22255 22528 22439 23226 23181 23454 23273 23461 22834 22648 22503 22883 22559 22808 22466 22681 22844 22761 23341 23235 23600 23779 23279 23276 22777 22996 23026 23104 22711 22924 22817 23011 22979 22877 23224 23164 23062 23334 23372 22884 23297 23317 23400 23140 23187 22937 23224 23124 23345 23069 23245 22908 23274 23292 23331 23169 23176 23076 23176 23239 23392 23290 23223 23039 23275 23202 23373 23173 23301 22982 23311 23072 23483 23188 23463 23049 23189 22954 23409 23207 23503 23191 23286 22860 23351 23130 23512 23181 23420 22952 23574 23052 23503 23143 23566 23093 23273 23060 23461 23129 23592 23089 23476 22894 23474 23042 23562 23148 23500 22848 23462 22928 23559 23013 23597 22992 23412 22784 23397 23028 23533 23122 23423 22967 23209 23062 23526 22999 23508 22928 23276 22817 23448 22917 23522 22929 23479 22803 23255 22954 23367 22821 23451 22852 23360 22951 23256 22973 
22199 22131 21853 22376 22138 22016 21807 22344 22133 21943 22089 22401 21978 22149 22196 22330 21911 22161 22298 22267 21766 22231 22061 22292 22038 22481 22023 22168 21854 22507 21997 22068 21995 22489 21924 22304 21951 22552 21783 22281 22019 22524 21628 22423 22138 22302 21885 22537 21967 22347 22000 22598 21636 22529 22066 22203 21895 22733 21748 22529 22109 22528 21831 22671 21689 22568 22097 22342 22040 22539 21817 22640 21924 22674 21735 22659 21859 22536 21916 22595 21899 22471 21947 22489 21968 22485 21873 22400 21972 22616 21945 22605 21841 22389 22065 22316 21978 22532 21782 22503 21852 22417 21820 22308 21989 22462 21881 22371 21933 22309 21947 22354 22012 22384 21982 22357 21877 22408 21842 22402 21718 22455 21847 22487 21927 22304 21878 22272 22103 22319 21937 22293 21970 22416 21844 22439 21851 22213 21944 22401 21988 22348 21799 22595 21856 22365 22084 22266 22326 22237 21735 22597 21906 22192 22387 22179 21839 22591 21875 22215 21934 22689 21806 22066 21729 22765 22002 22056 22149 22381 22486 22568 22247 22560 22679 22965 22336 22627 22376 23095 22514 22609 22442 22404 22821 22406 16475 17318 16749 17122 16897 17596 16925 22205 22216 22596 21623 22449 21866 22284 21581 22470 21664 21959 21601 22432 21511 22276 21415 22087 21396 21614 20665 21184 20645 21256 20756 21301 20661 21121 20570 21236 20641 21105 20602 21261 20736 21297 20401 21448 20547 21225 20427 21281 20589 21187 20484 21274 20444 21083 20650 21159 20533 21294 20631 21136 20695 21156 20679 21200 20631 21033 20659 21105 20583 21224 20727 21013 20748 21131 20550 21285 20524 21149 20642 21104 20580 21289 20520 21212 20649 21173 20679 21171 20504 21328 20783 21546 20768 21191 20551 21355 20792 21112 20968 21269 20667 21393 20815 20886 21092 21177 20552 21507 20684 21265 20892 21153 20977 21144 21002 21400 20869 21133 21128 20972 20729 21504 20731 21032 21160 20903 20967 21184 20929 21360 20936 21128 21231 20976 20789 21479 20793 21103 21061 21005 21096 21147 20689 21418 20987 20995 21381 21100 20828 21342 20983 20893 21296 21162 21171 21169 21054 21278 21350 20696 21553 20864 21166 21217 21585 21009 21576 20879 21324 21164 21100 21285 21154 21055 21499 20930 21265 21242 21076 21085 21335 20905 21538 20882 21303 21177 21265 21114 21455 18400 19189 18683 18988 18924 19100 18764 19349 19110 22944 22349 22368 22040 22648 21578 22152 21769 21921 21849 22161 21527 22251 21517 21911 21619 22144 21627 22305 21046 22080 21287 21773 21388 21734 21225 22033 21337 21916 21388 21549 21251 21984 20980 22057 21229 21619 21261 21717 21103 21959 21133 21689 21309 21687 21312 22100 21775 22019 21553 21767 21388 22001 21081 22007 21187 21696 21329 21815 21244 22126 21132 22034 21160 21830 21225 21757 21253 21927 21159 21678 21360 21815 21200 21988 21271 21744 21415 21801 21213 21893 21129 21685 21223 21884 21148 22141 21320 21789 21191 21744 21079 21857 20982 21874 21256 21696 21184 21895 21128 21806 21357 21674 21241 21857 21229 21924 21285 21691 21335 21702 21188 21806 21244 21586 21390 21803 21221 21896 21330 21655 21245 22002 21339 21465 21386 21845 21482 21835 21382 21863 21276 21608 21319 21811 21254 21627 21136 21842 21504 21671 21125 21423 21312 21978 21331 21696 21261 21379 21393 21952 21395 21644 21314 21542 21356 22018 21584 21641 21277 21499 21051 21827 21625 21893 21388 21617 21164 21468 21541 22022 21353 21457 21113 21543 21847 21619 21380 21519 21624 21960 21431 20300 20040 20759 20123 20448 20537 20935 20517 20170 20593 21522 21632 21128 21854 21399 21588 21327 21861 21830 21773 21484 21527 21389 21765 21457 21576 21601 21429 21692 21700 21389 21854 21176 21748 21414 21689 21450 21641 21479 21535 21560 21545 21401 21415 21529 21686 21269 21751 21447 21677 21213 21829 21402 21862 21225 21802 21482 21884 21411 21838 21321 21915 21521 21757 21444 21845 21552 21753 21509 21585 21432 21733 21528 21786 21329 22016 21203 22073 21371 22058 21060 22029 21244 21997 21315 21847 21432 21810 21403 21745 21397 21885 21210 22024 21258 22106 21045 22201 21507 22184 21617 22026 21871 22037 21703 22132 21639 22293 21722 22357 21430 22359 21645 22113 21582 22085 21414 22358 21399 22327 21540 22317 21511 22221 21633 22132 21479 22349 21481 22249 21513 22181 21698 22114 21588 22113 21544 22383 21392 22182 21575 22201 21530 22332 21527 22327 21002 22212 21582 22165 21455 22215 21344 22320 22023 22115 21619 21989 21667 22067 21504 22171 21613 22040 21856 22162 21579 22196 21503 22181 21624 22202 21744 22124 21494 22023 21712 21840 21405 21846 21229 21843 21320 21987 21237 21657 21519 22422 21349 21975 21321 21879 20745 21209 20951 21088 20760 21322 20621 21324 20932 21831 21429 21974 21479 21784 21603 21818 21549 21719 21447 21933 21241 21895 21772 21576 21399 22096 21337 21739 21946 21505 21570 22103 21455 21793 21979 21732 21496 22242 21739 21649 22006 21591 21565 22192 21459 21845 21969 21565 21473 22293 21499 21641 21956 21702 21447 21987 21768 21536 21803 21942 21360 21945 21660 21777 21607 22087 21398 21845 21540 21664 21828 21650 21808 21688 21956 21705 22176 21616 21804 21650 22122 21303 22120 21843 21721 21785 21906 21524 21906 21869 21697 21699 22023 21661 21902 22566 22672 22311 22771 22299 22442 22040 22041 21527 22032 21762 21782 21557 22060 21518 22119 22177 22301 21969 22544 21999 22156 21801 22343 21640 22147 21975 22119 21751 22315 21735 22350 21923 22455 21565 22307 21884 22153 21719 22478 21696 21970 21846 22470 21548 22231 21875 22354 21351 22459 21792 22113 21761 22464 21656 22283 21861 22460 21451 22437 21834 22298 21290 22487 21799 22209 21662 22451 21509 22208 21914 22297 21504 22550 21823 22080 21767 22472 21733 22167 21839 22283 21467 22587 21552 22327 21540 22425 21621 22192 21645 22361 21506 22324 21748 22375 21319 21992 21228 21693 21122 21581 21192 21742 21141 21728 21379 22917 22229 22893 22294 22871 21784 22581 22137 22663 21908 22619 21821 22367 21724 22435 21692 22360 21739 22192 21672 22339 21623 21952 21589 22112 21437 22069 21490 21926 21328 21944 21447 21905 21340 21984 21339 21973 21464 22539 22113 22747 22140 22617 22240 22663 22324 22528 22200 22430 22033 22561 22005 22455 22069 22417 21944 22326 22080 22701 22060 22482 21863 22404 22095 22440 21997 22587 21789 22310 22233 22059 21981 22512 21792 22284 22204 22152 21833 22380 21984 22220 22047 22182 21819 22479 22092 22247 22127 22067 22295 22746 22204 22158 22059 22048 22144 22208 22427 22131 22228 21990 21715 22154 22089 22535 21745 22220 21902 22293 22145 21770 21383 22298 21516 21957 21684 21582 21881 21724 21627 23104 22397 22749 22579 22857 22825 22348 22219 22561 22781 21993 22256 21641 22006 21265 22068 22151 22652 22313 22575 22427 22426 22491 22611 22258 22660 22363 22544 21897 22380 21976 22028 21985 21582 21880 21672 21685 21959 21581 22215 21764 22029 21911 21764 21920 21933 21721 22137 21542 22169 21597 22024 21749 21861 21871 22031 22048 22169 21997 22510 21752 22619 21696 22543 21657 22537 21715 22562 22148 22625 21808 22528 21664 22528 21745 22405 21625 22515 21814 22464 21872 22299 22040 22375 21997 22408 21969 22492 21605 22553 21787 22355 21958 22352 21993 22436 21767 22632 21704 22437 21963 22336 21760 22587 21533 22453 21888 22127 22017 22577 21538 22501 21986 22301 22039 22709 21937 22336 22016 22488 21771 22713 21853 22481 21911 22776 21575 22538 21571 22610 21696 22451 21784 22564 21475 22445 21959 22477 21900 22503 22152 22419 21939 22470 22106 22520 21835 22525 21871 22513 21680 22647 21764 22471 21921 22576 21936 22348 21838 22572 21880 22580 21863 22570 21859 22564 21707 22392 22040 22305 21817 22419 21946 22545 21823 22343 21861 22492 21798 22368 21911 22486 22069 22843 21905 22471 22125 22232 21982 22380 21988 22464 22040 22305 21908 22386 22079 22440 21815 22283 21949 22443 22004 22540 21836 22475 22131 22474 21751 22224 21914 22464 22132 22056 21899 22274 22033 22438 21999 22099 21862 22311 22161 22381 22009 22205 21885 22272 22348 22471 21741 22195 22001 22167 22362 22411 21852 22100 21876 22312 22371 22389 21800 22108 21924 22267 22410 22498 21802 22070 21935 22221 22461 22425 21786 21997 21807 22195 22331 22240 21707 22000 21902 22257 21948 22031 22178 21979 22449 22193 22400 22059 22273 22029 22272 22222 22570 22066 22034 17427 18005 18171 18437 18254 18486 18438 18769 18805 18947 23983 23920 23360 23624 22826 23021 22735 22695 22132 22841 22299 22836 22479 22787 22298 22551 22084 20151 19460 19927 19556 19906 19336 20066 19636 20256 23120 24000 23341 23492 22978 23463 23087 23447 22859 23318 22452 23200 22206 22734 22069 22599 22039 22152 19984 20803 20269 21015 20480 21063 20363 20933 20200 22246 22501 23185 22192 22630 21793 22256 21900 22350 21946 22440 22080 22987 22240 22653 22099 22751 21191 21601 21074 21481 20753 21991 20876 21831 20959 21753 22173 22549 22216 23329 22517 23040 22024 22543 21668 22103 21557 22150 21642 22241 21771 22151 21752 22065 21387 22016 21331 22300 21264 22113 21153 22017 21393 22365 21846 22204 21893 22439 21827 22518 21769 22482 21744 22401 21856 22544 21861 22500 21870 22265 21792 22327 21970 22339 21816 22230 21689 22240 21834 22427 21891 22358 21772 22336 21904 22507 22039 22344 21812 22311 21793 22472 21995 22296 22039 22322 21893 22297 22032 22512 21657 22133 21881 22420 22176 22076 21785 22280 22070 22507 21885 22189 21811 22214 22101 22480 21809 22198 22033 22288 22409 22072 21990 22148 21902 22566 21735 22124 21943 22700 22220 22105 21916 22353 22249 22051 21875 22476 22183 22299 21767 22583 22085 22148 22051 22519 21911 22112 22245 22188 21849 22429 21889 22309 21856 22023 22391 22302 22295 21797 22304 22081 22178 21948 22165 22158 22059 22006 22006 22109 21965 22133 22202 22180 22153 21843 22365 21959 22295 22053 22043 22167 22151 22017 22350 21845 22197 22253 22131 21960 22467 21881 22235 22083 22382 21607 22259 22067 22422 21883 22204 22105 22520 22007 22263 21643 22241 22144 22547 21987 22390 21692 22187 21877 22535 22094 22640 21941 22288 21841 22168 21827 22392 21878 22560 22083 22551 21856 21969 21595 22244 21773 22560 22009 22628 21978 22433 21666 22326 21647 22515 22037 22656 21965 22420 21768 22268 22041 22581 22104 22348 21586 22398 22058 22650 21751 22326 22016 22640 21889 22362 21767 22719 21739 22305 21873 22535 21636 22390 21833 22487 21693 22501 21897 22416 21656 22429 21782 22363 21959 22212 21889 22367 21813 22277 21898 22280 21746 22464 21680 22319 21760 22309 21661 22456 21645 22528 21730 22398 22061 22323 21740 22368 21826 22482 21815 22415 21729 22266 21972 22266 21940 22401 21820 22384 21819 22477 21915 22343 21847 22223 21976 22324 21920 22236 21959 22375 21924 22339 21783 22445 21863 22425 21728 22440 21817 22393 21838 22434 21809 22499 21764 22392 21694 22535 21847 22392 21918 22556 21877 22322 22324 22401 21980 22225 21752 22104 21883 22316 22074 22213 22138 22465 22009 22107 21829 22537 21651 22678 21697 22400 21775 22279 22217 22050 22237 22045 21945 22523 21845 22489 21773 22156 22396 22116 22065 22200 21881 22560 21988 22056 22208 22031 22078 22037 21987 22519 21945 22359 21996 22088 22239 21968 22281 22160 22086 21941 22513 21686 22320 22144 22103 22136 22391 21760 22313 22109 21993 22279 22440 21783 22229 22317 22107 22065 22466 21933 22076 22125 22400 21917 22423 22197 22189 21819 22565 21961 22088 22016 22537 21961 22192 17885 18469 17958 18857 18673 19109 18367 19163 18954 24597 23785 24278 23822 24122 23159 19776 19464 20049 19194 20057 19779 20377 19745 20580 24122 24665 23775 23924 23584 23033 20845 21432 20958 21718 21148 21532 20851 21802 21200 21751 21852 22793 22311 22984 22096 21689 21331 22149 21463 21808 20913 21822 21375 21927 21159 22577 23244 23340 22461 22742 22170 22530 21776 22518 21584 22253 21456 22216 21456 22300 21824 22530 21882 22532 21946 22503 21891 22439 21888 22420 22038 22496 21746 22507 21680 22471 21928 22613 21713 22504 21757 22483 21941 22438 21775 22440 21702 22441 21931 22455 21791 22511 21856 22332 21909 22600 21808 22308 21805 22400 21952 22596 21981 22192 21777 22384 21885 22396 22055 22309 21686 22288 21843 22327 21914 22457 21870 22151 21885 22383 21955 22585 21881 22263 21959 22266 21903 22592 22221 22292 21913 22215 21867 22276 22292 22279 21756 22476 21790 22223 22043 22390 22029 22090 21945 22081 21845 22128 22232 22449 21852 22112 21751 22049 21816 22452 22157 21942 22122 22005 21816 22239 22440 22240 21666 22597 21837 22011 21991 22477 22263 21959 21999 22204 22318 
