# Supplementary material for: An Active Feature Selection Strategy for DWT in Artificial Taste
Source: Hindawi journal article supplement (doi:10.1155/2018/9709505), 2018-01-01
Supplement: f1 [file 9709505.f1.zip › spirit-low-3.txt]

33584 31778 29933 30106 17957 20792 20580 22130 21784 22777 21935 22770 22376 23238 22588 22824 22730 23236 22658 23190 22213 23204 22449 23311 22540 23262 22802 23274 22490 23444 22651 23264 22611 23363 22713 23328 22509 23322 22705 23318 22517 23383 22512 23304 22858 23382 22801 23228 22695 23426 22797 23430 22669 23271 22912 23335 22720 23129 22724 23339 22757 23257 22633 23280 22864 23369 22712 23212 22805 23220 23169 23268 22951 23256 22822 23521 23129 22834 22880 23168 22902 23589 22937 23232 22722 23064 23072 23448 22835 23150 22887 23061 23408 23383 22849 22988 22928 23498 23146 22798 23429 23173 23536 23073 23177 23307 23480 23116 23492 23046 22992 23022 23571 23175 23313 22808 23317 23018 23612 23186 23351 22746 23440 23136 23515 22900 23305 22809 23532 22960 23587 22738 23176 22816 23533 22976 23546 22697 23248 22778 23671 22940 23483 22651 23416 22869 23621 22858 23414 22677 23431 22992 23517 22972 23396 22660 23562 22925 23635 22822 23385 22784 23392 22716 23516 22791 23526 22608 23377 22941 23516 22708 22720 22651 23405 22832 23526 22592 23417 22704 23387 22883 23452 22884 21351 20304 21077 20928 21403 20920 21691 21308 21920 21579 26120 24780 24762 24048 24241 23520 23869 23356 23789 23496 23885 23087 23424 23234 23639 23499 23268 23152 23471 23399 23730 23137 23315 23096 23658 23395 23305 23219 23600 23340 23303 23206 23655 23268 23266 23212 23700 23086 23415 23592 22982 23644 23350 23376 23318 23398 23252 23573 23176 23601 22937 23661 23028 23655 23176 23644 22989 23744 23050 23588 23136 23701 22917 23703 23456 23680 23161 23509 23228 23300 23249 23484 23150 23646 22896 23853 22771 23762 23001 23873 23012 23612 23189 23499 23171 23415 23223 23602 23183 23537 23077 23716 22948 23639 23032 23600 23009 23522 23121 23541 23242 23514 22905 23461 22968 23696 22825 23506 22822 23500 22950 23444 22990 23482 22917 23493 23041 23606 22924 23520 22351 23129 22599 23368 23162 23383 22616 23904 22231 23074 22508 23140 22788 23053 23004 23076 22966 22976 22904 23405 23384 23695 23160 23346 23204 23206 23525 23156 22927 23557 22981 23564 23095 23172 23437 23191 23058 23488 22878 23413 22727 23130 23521 22706 23591 23175 23420 22962 23351 22796 23383 23065 23257 23022 23161 22872 23473 22707 23329 22922 23151 22903 22676 21035 22007 21726 22152 21816 23559 22155 22329 25660 25114 23728 24444 23475 23299 22898 23400 22685 24504 22528 23308 22965 23716 22704 23536 22897 23558 22966 23561 22802 23540 22700 23450 22788 23568 22639 23451 22841 23255 22648 23442 22804 23264 22772 23280 22622 23564 22690 23527 22884 23365 22631 23444 22804 23330 22668 23396 22150 24069 23239 23226 22855 23347 22658 23210 23045 23174 22642 23344 22819 23168 22761 23315 22757 23360 22901 23246 22913 23437 23040 23234 23180 22906 22825 23399 22900 23153 22892 23360 22940 23144 23310 23223 22949 23618 22830 23008 23235 23050 22800 23322 23037 22861 22965 23367 23209 23080 23362 22789 23520 23069 23307 22951 23492 22871 23246 23138 23428 22833 23346 23132 23073 22867 23634 22837 23280 23085 23524 22692 23416 23021 23251 22839 23638 22944 23145 22865 23573 22868 23312 22977 23680 22625 23406 22957 23581 22636 23576 22983 23460 22721 23585 22857 23300 22774 23554 22784 23321 23064 23597 22649 23494 22769 23572 22559 23484 22792 23552 22661 23366 22795 23456 22799 23354 22875 23503 22594 23446 22905 23271 22685 23497 22816 23408 22733 23420 22926 23258 22806 23335 22977 22231 22042 22788 22381 22887 22348 22949 22603 22770 22497 24522 23466 23474 23021 23481 23244 23140 23015 23270 23223 23246 23045 23300 23239 23251 23452 23072 23317 23488 23216 23134 23164 23352 22971 22962 23197 23438 22857 22947 22928 23593 22850 23030 23058 23298 22989 23009 23317 23159 23467 22776 23312 23100 23403 22841 23139 23299 23405 23120 23283 23137 23410 22976 23062 22889 23527 23080 23237 22884 23505 23107 23322 22705 23475 22991 23489 22685 23442 23054 23531 22958 23306 22743 23623 22976 23479 22678 23593 22880 23688 22596 23372 23008 23613 22866 23236 22863 23608 22999 23403 22822 23505 22954 23613 22771 23448 22592 23383 22944 23471 22727 23413 22887 23417 22715 23417 22659 23517 22807 23265 22680 23445 22800 23417 22580 23249 22728 23413 22997 23190 22775 23368 22836 23440 22743 23377 22820 23291 22877 23292 22944 23303 22948 23334 22832 23308 22923 23504 22933 23281 22930 23254 23306 23365 22717 23200 22944 23585 22980 23424 22876 23199 23353 23428 22928 23125 22864 23463 23164 23066 22896 23095 23485 23437 22852 23044 23088 23471 23229 22969 23442 23181 23442 22988 23504 23156 23304 23201 23464 23175 22984 23035 22859 22513 22646 22711 23085 22475 23157 22740 23164 23335 23688 23174 23488 23184 23475 22851 23712 22768 23708 22905 23559 22928 23444 23017 23345 22977 23328 22941 23524 22791 23582 22709 23653 22108 23700 22663 23625 22689 23607 22713 23557 22896 23484 22899 23511 22897 23444 22748 23572 22805 23568 22752 23609 22713 23462 22852 23252 22926 23316 22806 23360 22638 23436 22703 23607 22650 23560 22593 23355 22951 23319 22825 23379 22832 23522 22745 23264 22880 23354 23005 23030 22788 23204 22807 23314 22872 23417 22896 23436 22913 23299 22940 23150 22976 23111 23141 23529 23220 23142 23239 23233 22980 23158 22819 23095 22803 23110 22636 23185 22943 23300 22848 23251 22829 23245 22864 23048 23157 23146 23370 23067 23408 23149 23312 22964 23297 23192 23504 23160 23040 23223 23160 23064 23409 22838 23364 23193 23316 23143 23269 23068 23436 23008 23513 22724 23578 22981 23373 23076 23432 22939 23674 22759 23584 22948 23430 22994 23352 22861 23611 22643 23628 22856 22752 22971 23543 22801 23785 22712 23596 22967 23326 22855 23620 22629 23663 22874 23504 23040 23492 22934 23688 22880 23368 22806 23593 22637 23618 22792 23476 22669 23159 22358 23095 22615 23149 22464 23296 22520 23359 22404 23840 22878 23502 22958 23657 22808 23520 22752 23464 22912 23296 22867 23485 22959 22871 22823 23535 22945 23223 22949 23261 22860 23318 22903 23332 22840 23400 22837 23239 22998 23156 22803 23416 22904 23253 22994 23408 22648 23095 23172 23077 22972 23235 23218 23635 22998 23511 22967 23089 23304 23149 22849 23154 23289 23287 22950 23428 22808 22901 23174 23244 22897 23130 23386 22796 23461 23086 23277 22961 23497 22827 23277 23178 23354 22732 23329 23147 23265 23351 23476 23187 23055 22960 23508 22967 23416 23131 23713 22939 23345 23298 23437 22912 23361 23114 23557 22713 23584 23193 23332 23024 23596 23072 23188 22912 23641 23155 23379 22720 23537 22767 23349 22845 23636 22875 23325 22901 23669 22743 23305 22809 23708 22838 23058 23053 23641 22857 23383 22932 23696 22552 23465 22727 23732 22757 23473 22739 23648 22724 23431 22817 23440 22784 23345 22868 23671 22636 23656 22624 23706 22679 23538 22695 23640 22706 23338 22759 23559 22935 23216 22880 23429 22759 23287 22793 23217 22790 23386 23066 23420 22986 23399 22926 23334 22822 23574 23063 23347 22883 23515 22736 23242 22813 23324 23047 23309 22784 23132 22967 23372 22753 23150 22912 23548 22919 23557 22912 23232 23040 22888 22700 22988 23171 23434 22420 22999 23056 23456 22695 22993 22896 23607 23297 23085 22876 23104 23324 23057 22349 23175 23068 23451 22944 23398 23529 23341 23418 22905 23433 23191 23618 22935 23257 23008 23536 23081 23159 22829 23107 23143 23433 23024 23119 22752 23302 23190 23336 22682 23304 22982 23557 22859 23232 22976 23459 23098 23466 22780 23345 22869 23570 23015 23291 22581 23206 23043 23460 22968 23390 22573 23264 22872 23505 22918 23288 22648 23347 22844 24216 23240 23552 22998 23927 23111 23818 22860 23896 22993 23843 23120 23554 22963 23552 23159 23739 22852 23357 22976 23748 23209 23745 22745 23476 22765 23568 22841 23588 22693 23572 22739 23572 23040 23656 23024 23424 23050 23608 22983 23520 22805 23586 22908 23707 22632 23459 22760 23547 22845 23576 22919 23472 22869 23636 22865 23357 22969 23521 23000 23430 23014 23613 22870 23420 22996 23413 22980 23623 23023 23399 23136 22964 22984 23356 22912 23503 22888 23559 23060 23415 22881 23429 23046 23488 22986 23686 23088 23409 23008 23026 23240 23020 23397 23360 23296 23367 22915 23406 22992 23689 23024 23439 23019 23121 23353 23111 23197 23150 23308 23642 23087 23308 23245 23559 22953 23138 23027 23562 23223 23169 23448 19581 20441 20812 21329 20999 21913 21521 21894 21335 27618 25525 24525 24299 24288 23800 23591 23704 23872 23296 23676 23413 23286 23442 23680 22999 23764 23136 20579 21110 21849 21694 22304 21761 22583 22009 22492 26240 24978 24278 24307 23568 24160 23140 24008 23073 23897 23109 23812 23091 23179 22511 23304 22746 22092 22045 22848 22245 23088 22205 23264 22252 23228 22145 24146 23189 23932 22789 23680 23381 24033 23011 23881 23091 23687 23189 23635 23141 23581 22917 23617 21312 22577 22043 23079 22279 23040 22444 23040 22509 22992 23767 24073 23202 23901 22938 23546 22997 23546 22994 23537 22752 23598 22789 23464 22897 23527 22902 22656 22381 23160 22496 23207 22503 23043 22803 23179 22577 23501 22920 23394 22890 23640 23281 23367 22960 23605 22967 23438 23013 23261 22913 23413 22776 23437 22964 23490 23097 23168 22996 23564 22831 23324 23282 23176 23040 23669 22868 23260 23256 22976 22944 23380 22777 23040 23024 23100 22677 23117 23030 22982 22755 23327 22753 23156 23429 23066 22713 23106 23024 23021 22925 23474 22851 23034 23216 23219 22933 23090 23227 22731 23328 23121 23104 23631 23763 23072 23111 22801 23373 22900 23079 23043 23207 22926 23187 23131 23330 22857 23146 23201 23338 22740 23279 23015 23436 22558 23429 22881 23364 22860 23440 23040 23232 22770 23398 23004 23314 22724 23510 22897 23393 22592 23388 22988 23400 22665 23399 23062 23451 22602 23451 22941 23424 22608 23484 22903 23472 22581 23450 22941 23643 22633 23808 22804 23649 22768 23238 22954 23590 22705 23181 22963 23563 22804 23145 22861 23629 22817 23337 22736 23571 22729 23381 22583 23399 22761 23552 22695 23300 22873 23437 22718 23232 22848 23432 22908 23349 22762 23531 22576 23344 22615 23496 22569 23416 22656 23511 22703 23372 22669 23418 22784 23325 22741 23343 22869 23384 22777 23264 22720 23382 22876 23348 22873 23287 23084 23574 22817 23205 22935 23476 23037 23345 22185 23388 22924 23456 22795 23331 22871 23296 23040 23331 22717 23244 22881 23480 22928 22999 22940 23269 23236 23464 22731 23200 22951 23138 23248 23162 22889 23049 22952 23539 23181 22962 22863 23318 23159 23568 22876 23169 22934 23207 23387 23189 23051 23016 22865 23568 23355 23073 22855 23039 23169 23539 22922 23351 23096 23371 23125 22957 23040 22824 23476 23081 23319 22744 23073 22946 23453 23079 23191 22949 23080 23052 23402 23112 23333 22945 22656 23008 23465 23148 23341 22632 23357 22994 23572 23060 23392 22674 23336 23063 23544 23111 23352 22758 23214 23056 23528 23144 23341 22673 23330 23004 23553 23062 23421 22644 23856 22893 23589 23009 23337 22530 23365 22896 23616 22867 23380 22678 23554 22976 23687 22869 23339 22480 23588 23009 23632 22792 23232 22766 23543 22941 23600 22803 23396 22774 23591 22876 23520 22533 23535 22688 23413 22799 23489 22703 23367 22812 23442 22934 23377 22204 23369 22881 23505 22715 23397 22785 23432 22733 23581 22683 23491 22620 23596 22766 23511 22602 23476 22797 23415 22912 23226 22830 23416 22762 23305 22714 23336 22888 23239 22888 23260 22968 23371 23003 23233 22875 23409 22629 23292 22857 18966 20356 20956 20967 22217 21722 22371 21795 22177 21918 26176 24636 23522 23864 23657 23350 22192 21269 23052 21319 22186 22048 22956 23060 22794 25532 24788 23863 24369 23637 23717 22058 22378 22816 22766 22497 22895 22594 23214 22950 22999 23108 23297 23589 23095 23440 22788 22773 22774 22862 22901 23145 22768 23355 22925 22838 24289 24404 22742 23204 23193 23340 22422 23251 22626 23170 22861 23093 23046 23080 22951 23223 23162 23054 23057 23209 22969 23325 22858 23381 22790 23543 22692 23384 22672 23406 22941 23351 23088 23113 22964 23238 22913 23328 22947 23607 23025 23528 22563 23617 22876 23372 22960 23372 22960 23394 22805 23698 22817 23585 22521 23581 22860 23783 22857 23296 22900 23345 22689 23648 22698 23568 22848 23425 22935 23301 22857 23416 22679 23528 22600 23460 22708 23389 22858 23383 22652 23431 22624 23479 22931 23401 22722 23405 22785 23468 22632 23428 22592 23520 22533 23375 22712 23385 22785 23432 22719 23384 22753 23401 22711 23271 22795 23170 22837 23495 23120 23474 22996 23476 22826 23335 22885 23277 22977 23459 22839 23538 22893 23513 22934 23352 23052 23386 22960 
20912 21988 21162 22025 20908 21817 20791 21785 20781 21811 20599 21892 20652 21879 20557 21828 20633 21859 20764 21813 20677 21776 20775 21942 20852 21760 20718 21898 20749 22010 20919 21687 20937 21531 21149 21754 21016 21664 21695 21278 21177 21206 21473 21414 21536 21168 21296 21322 21637 21259 21384 21001 21624 21272 21529 21103 21313 21121 21870 21233 21593 20960 21653 21179 21878 20964 21367 20872 21865 21225 21784 20765 21633 20965 21891 21130 21623 20582 21634 21061 21827 21133 21496 20841 21594 21145 21753 20928 21499 20861 21812 20905 21848 20889 21415 20848 21693 21072 21568 20983 21546 21083 21674 21012 21582 20905 21613 20905 21892 20957 21659 20910 21749 21117 21745 21104 21657 20964 21618 21337 21718 20961 21499 20965 21660 21051 21480 20998 21522 21142 21824 21132 21604 21030 21761 21122 21660 20977 21627 21113 21412 21536 21653 20909 21392 21174 21531 21475 21349 21018 21260 20954 21868 21478 21332 21140 21196 21329 21809 21198 21161 20969 21296 21381 21777 21219 21409 21856 21469 21790 21066 21349 21128 21664 21396 21504 21003 21347 21279 21651 21381 21436 21001 21338 15433 16663 16334 16875 16233 16584 16826 17328 17026 17291 23706 23879 23280 23564 22688 22912 22461 23008 22392 23027 21953 22596 21969 22824 22145 22738 21608 22649 22016 22784 21936 22268 21799 22746 22026 22485 22101 22700 21986 22400 21643 22445 21953 22336 21717 22344 22068 22372 21859 22359 21635 22311 21888 22406 21604 22289 21609 22563 21580 22421 21518 22385 21730 22282 21719 22276 21771 22227 21679 22166 21709 22133 21575 22390 21665 22369 21668 22158 21875 22235 22020 22024 21953 22243 21660 22085 21692 22471 21791 22436 21655 22089 21797 21992 21947 22074 22329 21978 22287 21824 22086 21801 22240 21773 22377 21964 22390 21781 22194 21945 22309 21781 22395 21694 22498 21743 22316 21782 22192 21591 22309 21729 22277 21730 22253 21528 22462 21478 22504 21477 21538 20659 21767 21182 22050 21075 21435 22168 21485 21000 21283 21002 21184 21038 21399 20812 21744 20430 21712 20661 21944 21370 22167 21607 21876 21543 22256 21130 22001 21385 22167 21614 21975 21307 22033 20946 21770 20978 21763 21291 21777 21321 21796 20887 21927 21227 22150 20870 21799 20305 21648 21043 21596 20786 21504 20811 21489 20789 21521 20996 21315 18409 17609 17280 18063 18020 18291 17872 20208 18072 18551 23837 21809 22188 22896 22065 21386 21037 21174 20809 22826 20999 21203 21431 21491 21175 21351 21289 21352 21187 21833 20925 21563 21132 21104 21124 21682 21616 21279 21533 21051 20844 21552 20917 21180 21423 20673 21436 20981 21399 21426 21632 20816 21421 21103 21184 21021 21404 20834 21337 22466 21980 20998 21744 21177 21357 21153 21637 20808 21526 21002 21250 20930 21550 20567 21526 21241 21402 20816 21664 20928 21302 21124 21696 20689 21726 21093 21432 20825 21808 20779 21529 21201 21536 20869 21957 20985 21436 21076 21884 20750 21624 20923 21526 20821 21672 21073 21511 20819 21664 20720 21466 20992 21613 20708 21570 20884 21552 20746 21580 20757 21501 20965 21489 20719 21629 20937 21399 20918 21569 20924 21445 21205 21413 20839 21505 20964 21340 20883 21565 20846 21361 21005 21722 20829 21293 21157 21472 21393 21284 21448 21162 20840 21344 21443 21161 20854 21730 21060 21195 21022 21879 21019 21282 21136 21751 20803 21063 21232 21678 20958 21222 21306 20967 21240 21272 21713 20759 21384 21383 21464 20966 21435 21312 21346 20909 21542 21310 21424 20941 21561 21229 21479 19425 20182 19886 20298 19655 20346 19943 20451 19544 20362 22256 22317 21223 21808 21542 21923 20841 21739 21253 21973 20714 21798 21257 21940 20637 21707 21283 21952 20875 21696 21309 21920 20878 21432 21071 21959 20890 21395 20800 21706 21028 21511 20955 21600 21010 21596 20842 21363 20856 21745 20723 21504 20825 21785 20645 21513 20650 21640 20849 20944 20892 21655 21038 21447 20999 21533 21112 21463 21010 21367 21095 21564 20864 21364 20953 21591 20707 21403 20981 21701 21144 21298 20993 21399 21381 21236 21029 21257 21256 21510 20855 21283 21024 21716 21371 21294 20847 21312 21456 21173 20903 21117 21148 21774 21024 21212 21015 21328 21504 21203 20887 21334 21489 21152 21233 21068 21684 21099 21403 20843 21329 21287 21505 21095 21036 21166 21623 21239 21360 20820 21555 21147 21724 20995 21341 20942 21806 21265 21452 20881 21585 21227 21761 20818 21423 20992 21765 21140 21476 20992 21866 21183 21815 20988 21483 21068 21937 21097 21558 21070 21829 21334 21811 20980 21514 21142 21867 21099 21611 20932 21745 20962 21943 21089 21863 21070 21713 21314 21679 21298 21687 21286 21902 21200 21933 21036 21817 20786 21696 21129 21492 19623 20544 19926 20544 20066 20824 19916 20647 20200 20875 21259 21722 21243 21714 21139 21722 20979 21812 21055 21719 20990 21613 21212 21717 21163 21623 21233 21233 21140 21207 20939 21309 20871 21644 20974 21687 20405 21484 20851 21264 20819 21152 21176 21029 21489 21298 21421 21225 21193 21267 21008 21617 21037 21821 21157 21773 21291 21442 21416 21258 21428 20960 21618 20915 21642 21111 21424 21263 21196 21386 21154 21311 21545 20800 21776 20884 21559 21332 21159 21365 21461 20920 21888 20664 21847 20763 21770 20806 21760 20855 21720 20845 21802 20869 21861 20900 22011 20877 21705 21008 21621 21143 21491 21184 21472 21339 21537 21304 21573 21347 21780 21447 21707 21287 22016 21172 21702 21001 21603 20979 21773 20902 21809 20992 21720 21038 21652 21114 21509 20957 21619 20905 21685 20917 21883 20967 21681 21079 21492 21094 21435 20912 21721 21016 21652 20992 21610 20975 21591 21289 21684 21130 21635 21057 21671 21132 21573 21225 21400 21104 21781 20840 21573 21299 21530 21399 21610 21125 21883 20956 21466 21571 21147 21002 21881 20909 21444 21446 21530 21227 21722 21059 21389 21462 21273 21273 21617 21120 21468 21530 21688 21161 21217 20673 21088 20992 20367 21189 20760 20791 20631 21934 21227 21600 21566 21547 21488 21598 21421 21200 21392 21710 20850 21669 21321 21395 21184 21760 21142 21528 21256 21692 20850 21745 21121 21559 21018 21831 21020 21575 21239 21684 20854 21773 21161 21497 20865 21967 20883 21672 21203 21858 20803 21814 21092 21621 20910 21921 21092 21527 21221 21944 20858 21688 21097 21549 20972 21998 20817 21456 20674 21729 20898 21540 20918 21655 21088 21341 21117 21466 20768 21592 20945 21549 20818 21941 20593 21821 20924 21744 20821 21731 21092 21417 20903 21504 21208 21665 21319 22001 21261 21482 21104 21867 21059 21703 21282 21848 20955 21639 21299 21829 21025 21495 21161 21219 20997 21624 21451 21620 20811 21446 21239 21397 21068 21618 21354 21433 20841 21721 20896 20708 20733 21689 21320 21206 21124 22075 21058 21044 21012 21811 21066 21146 21210 21969 21003 21148 21267 21748 21152 21133 21463 21239 21440 21301 21682 21125 21524 21253 21957 21291 21271 21320 21745 21499 21152 21377 21829 21504 21575 21158 21680 21489 21402 20763 21409 21200 21685 20872 21630 21547 21760 21096 21690 21157 21815 21366 21402 20977 21921 21168 21600 20852 21675 21271 21777 20836 21332 21060 21652 20860 21312 20902 21685 20979 21315 20736 21784 20938 21589 20633 21619 20999 21959 20955 21730 21184 21710 20997 21383 21010 22043 21053 21605 20821 21842 20914 21701 20738 21581 20903 21506 20806 21515 20906 21817 21220 21795 21127 21594 21072 21691 21077 21658 20829 21628 20828 21760 20757 21425 20779 21635 20905 21470 20878 21557 20952 21483 20821 21479 20832 21653 21063 21414 20893 21385 20948 21608 20913 21421 20845 21498 21048 21422 20777 21390 20809 21426 20896 21504 20756 21301 20872 21415 21176 21085 20971 21168 20979 22662 21972 21753 21649 21981 21763 22065 21525 21952 21561 21778 21870 21851 21597 21444 21413 22156 21849 21618 21419 21542 21724 22263 21546 21537 21344 21707 22008 22032 21456 21527 21372 21999 22037 21142 21785 21547 22108 21658 21974 21174 21843 21680 22159 21529 21642 21553 21992 21779 21760 21400 21463 21749 21966 21613 21623 21396 22096 21650 21753 21369 22180 21441 21703 21593 22008 21319 21966 21635 21698 21713 21885 21395 22225 21080 22257 21207 22130 21463 21878 21601 22243 21703 21856 21543 21923 21347 22273 21032 22297 21253 22238 21308 22019 21511 21861 21450 21792 21520 21925 21460 22085 21203 22211 21297 22117 21429 21844 21570 21868 21258 22135 21184 21906 21356 21993 21280 22071 21432 22088 21236 21977 15399 16391 16306 16947 16848 17494 16881 17616 16753 25200 23520 23767 22714 23331 22231 22508 21974 22498 21765 22481 21816 22272 21843 22036 21657 22314 15411 17040 17357 17966 17857 18425 17857 18759 18183 18842 23948 23937 23117 23096 22413 22581 21903 22621 21536 22489 21648 22211 21685 21477 20793 21238 20992 19595 19575 20011 19543 20034 19671 20198 19691 20233 19621 21981 21229 22033 21480 21838 22046 22416 21560 21937 21786 21752 22007 21624 22100 22125 21760 21536 19140 19917 19572 20493 20028 20310 20004 20080 20564 19988 22753 22020 22542 21924 22217 21595 21931 21681 22068 21348 22133 21560 21776 21742 21547 21904 21804 20467 21117 20520 20953 20979 20763 20796 21067 20472 21903 20764 21512 21303 21385 21760 22098 21117 22052 21330 21884 21458 21744 21318 22055 21138 21869 21395 21676 21298 21848 20963 22026 21277 21650 21355 21986 20888 22053 21319 21765 21336 21963 20769 21959 21105 21411 20935 21720 20826 21696 21001 21381 20800 21687 20708 21582 21000 21543 20541 21705 20973 21387 20526 21406 20773 21541 20763 21564 20604 21351 20769 21520 20423 21191 20834 21321 21420 21795 21178 21602 20508 21378 20579 21565 20524 21539 20487 21372 20596 21543 20601 21349 20727 21497 20757 21263 20856 21516 20585 21304 20918 21351 20279 21326 20917 21340 20968 21208 20823 21498 20737 21163 20789 21417 20488 21178 20908 21417 20684 21356 21040 21472 20636 21209 21120 21323 20694 21185 21176 21588 20647 21056 20976 21601 20853 21222 20947 21473 20800 21104 20971 21804 21015 21322 20822 21571 21223 21123 20857 21397 21152 20998 20696 21198 21446 20978 20682 21174 21409 20930 20666 21127 21472 20961 21097 21372 21147 20791 21105 21047 21524 20829 21109 20992 21383 20921 21036 20962 21365 21117 20992 20936 21436 21220 21262 20672 21208 21098 21472 20808 21281 20935 21495 21002 21152 20939 21622 21302 21741 21176 21297 21031 21836 21176 21606 20772 21543 21181 21833 20960 21321 21070 21668 21248 21569 20864 21212 21036 21779 21104 21367 20908 21498 21212 21856 20871 21440 20998 21843 21216 21799 20800 21640 20953 21850 21179 21465 20847 21679 21148 21771 21040 21429 20993 21928 21137 21756 20737 21877 20780 21831 20890 21776 20850 21531 20946 21702 20929 21647 21226 21633 21009 21559 21095 21378 20747 21517 20949 21640 20840 21643 20728 21608 20869 21666 20796 21431 20801 21513 20983 21496 20762 21419 20877 21472 21058 21489 20837 21539 20889 21523 21136 21553 20835 21438 20864 21468 21173 21473 20727 21372 20960 21417 20954 21553 20807 21563 20821 21456 21026 21577 20765 21475 20897 21399 21061 21185 20729 21300 20890 21592 21141 21075 20983 21527 21209 21668 21430 20999 21024 21368 20992 21873 21141 21056 20669 21126 21239 21665 21100 21209 21015 21307 21504 21584 20962 21203 21095 21673 21448 21243 20953 21191 21002 21632 21455 21089 21227 21469 21552 21154 21104 20989 21693 21269 21655 20812 21303 21234 21729 21192 21265 21043 21424 21493 21529 20913 21811 21333 21574 21311 21157 20992 21638 21155 21512 20821 21479 21272 21555 21008 21349 21312 21595 21084 21109 21248 21716 14756 16889 16504 17229 16434 18455 18102 18071 17705 18661 23887 23820 21365 22503 21369 22342 18676 19975 19311 18270 18250 19895 19539 20460 19371 24554 22862 23340 22365 22792 22325 19936 19792 20441 19712 20675 19671 20722 19777 20582 21068 21529 20843 21581 20521 21668 19883 20890 19920 20663 20057 20627 20366 20721 20225 20748 22191 23118 20458 21391 20368 21031 20066 21080 20067 21057 20412 20972 20302 20875 20639 21379 20655 21260 20561 21200 20480 21273 20616 21333 20685 21350 20761 21261 20665 21351 20838 21287 20899 21315 20878 21278 20777 21340 20871 21376 20749 21433 20534 21218 20884 21172 21095 21316 20983 20922 20936 21418 20898 21368 20729 21129 21147 21128 21153 21049 20772 21431 20738 21842 20672 21072 21098 21136 21467 21037 21061 21201 20830 21512 20985 21450 20711 21021 21400 21030 21241 20858 21364 20961 21238 21039 21102 21073 21371 20785 21668 20598 21583 21018 21185 21153 21002 21293 21170 20976 21460 20695 21396 20986 21105 21137 21066 21106 21319 20768 22274 20872 21858 21304 21430 21197 21236 21232 21735 21176 22003 21177 21860 21309 21532 21390 21778 21113 21959 
21184 21530 21227 21420 21056 21363 21108 21446 20963 21440 21095 21451 21110 21522 21234 21504 21116 21351 21081 21505 21049 21399 21020 21420 20998 21465 21026 21330 21156 21399 21249 21345 21417 21257 21631 21289 21561 21352 21424 21401 21534 21401 21267 21301 21517 21180 21554 21232 21456 21299 21352 21454 21353 21450 21183 21440 21207 21491 21344 21417 21382 21321 21501 21364 21521 21212 21526 21127 21597 21316 21369 21248 21443 21462 21333 21113 21280 20736 21078 20969 21159 21192 21129 21124 21074 20820 21315 21130 20972 20888 21107 20946 21448 20948 21454 20925 21115 21205 21154 21087 21142 21240 21113 21205 20953 21121 21287 21377 21193 21115 21165 21220 21244 21312 21098 21148 21091 21389 21207 21381 20961 21271 21072 21381 21152 21366 20822 21206 21159 21358 21042 21207 20873 21217 21198 21370 21085 21178 20320 21388 21010 21460 20957 21169 20880 21417 21028 21399 20948 21037 20854 21519 21037 21376 20839 21089 20962 21443 21060 21436 20679 21255 20886 21386 21080 21290 20825 21223 20963 21366 20896 21349 20809 21422 20818 21518 20880 21475 20795 21273 20966 21394 20936 21431 18896 18825 17889 18231 17789 18274 17940 18377 18183 23323 22231 22279 21760 21868 21596 21738 21280 21602 21472 21698 21521 21575 21286 21672 21470 21667 21162 21452 21409 21669 21582 21476 21160 21501 21584 21602 21341 21499 21676 21521 21297 21569 21696 21321 21280 21472 21649 21166 21646 21553 21424 21632 21671 21403 21666 21376 21745 21541 21553 21531 21463 21571 21373 21541 21511 21458 21503 21496 21455 21600 21347 21568 21623 21448 21668 21425 21798 21237 21737 21373 21664 21465 21621 21456 21575 21477 21669 21424 21719 21351 21783 21190 21783 21299 21673 21367 21722 21345 21706 21344 21760 21279 21804 21283 21793 21242 21841 21265 21824 21298 21682 21296 21764 21235 21736 21280 21781 21197 21721 21263 21737 20615 21732 21569 21621 21248 21753 21259 21625 21197 21257 20988 21376 21177 21512 21021 21216 21634 21123 20869 21264 20961 21026 20949 21348 20908 21326 20789 21209 20955 21586 21649 21568 21250 21489 21313 21725 21340 21276 21520 21456 21603 21355 21167 21634 21247 21321 21115 21392 21459 21112 21409 21275 21492 21416 21328 21175 21440 21333 21243 21310 21329 21155 21331 21106 21188 21230 21108 21076 21376 20875 18560 18889 18894 19032 19411 18960 19362 20137 19177 19968 22856 20849 21655 21554 21216 20837 21266 20760 22277 21780 21104 20728 21541 21165 21335 21002 21287 21094 21399 21049 21269 21078 21299 20773 21458 21019 21304 20821 21368 20817 21344 20887 21048 20911 21324 20704 21376 20953 21315 20922 21422 20753 21227 20858 21304 20835 21270 20963 21145 21709 21497 20856 21291 21074 21351 21035 21391 20834 21272 20945 21259 20808 21256 20851 21294 20996 21300 20885 21260 21098 21226 20979 21457 21064 21286 21186 21173 20951 21259 20957 21129 21043 21443 20872 21210 21367 21322 21017 21454 20893 21175 21301 21105 20935 21278 21060 21095 21300 21159 20919 21185 21334 21020 21213 21221 21175 21091 21570 21193 21380 21220 21286 21088 21248 21093 21274 21099 21353 21094 21137 21271 21409 20885 21284 21159 21357 20893 21422 21141 21284 20980 21449 21063 21340 21115 21458 20992 21332 21136 21534 20876 21370 21051 21419 21053 21445 21095 21368 20902 21479 21128 21295 20869 21546 21048 21331 20905 21372 21077 21351 20923 21421 21112 21769 20894 21403 20918 21357 20928 21422 20875 21361 20919 21469 20748 21309 21021 21418 21139 21333 21040 21448 20237 20492 20278 20776 20097 20638 20458 20751 20341 21637 21652 21958 21184 21319 21152 21517 20896 21325 21021 21452 21012 21305 21043 21495 20933 21174 21127 21612 21048 21239 21107 21437 21177 21384 21114 21487 21252 21212 21025 21238 21253 21157 21071 21335 21175 20973 21157 21307 21313 21112 21171 21177 21380 21241 20999 21232 21271 21388 21169 21153 21351 21353 21299 20939 21344 21204 21472 21111 21277 21236 21429 21095 21068 21165 21421 21160 21286 21036 21429 21157 21422 20992 21397 21127 21553 20997 21851 21152 21473 20997 21202 21001 21520 21232 21512 20832 21431 21204 21417 20978 21840 21076 21524 21072 21440 20840 21415 20960 21531 20985 21369 21056 21383 21067 21392 21008 21449 21020 21526 20852 21348 20870 21507 20992 21297 20889 21267 21139 21385 20969 21371 21011 21345 21180 21297 20918 21339 21065 21481 20908 21324 21128 21523 21059 21581 21010 21307 21097 21447 21040 21381 21047 21515 21144 21115 21156 21341 21327 21264 21485 21393 21163 21737 21341 21453 21200 21305 21416 21412 21440 21360 21182 21699 21315 21324 21172 21450 21559 21152 21485 21461 21391 21202 21401 21367 21543 21184 21404 21441 21391 21058 20610 20753 20779 20819 20969 20728 20751 20706 20984 20711 21488 21493 21436 21220 21506 21140 21428 21264 21424 21340 21234 21331 21472 21137 21463 21076 21478 21122 21475 20914 21634 20992 21564 21003 21445 21056 21424 21144 21354 21084 21233 21240 21329 21071 21497 20981 21669 20945 21513 20976 21501 21148 21384 21120 21392 21100 21383 21072 21403 21049 21483 20983 21501 21222 21418 21036 21380 21165 21484 20943 21431 20969 21424 21090 21354 21144 21344 21113 21408 21053 21480 20944 21376 21174 21468 21120 21511 21028 21481 21032 21406 21085 21413 20823 21539 21143 21605 21099 21481 21161 21298 21115 21156 21168 21472 21286 21738 21341 21312 21419 21210 21410 21355 21405 21249 21367 21339 21213 21239 21120 21364 21164 21521 21191 21433 21160 21376 21480 21107 21543 21223 21511 21248 21401 21352 21210 21390 21406 21286 21441 21090 21440 21327 21444 21333 21546 21368 21380 21294 21607 21084 21703 21169 21579 21293 21433 21205 21548 21114 21601 21249 21427 21241 21562 21180 21632 21071 21552 21218 21369 21156 21600 21248 21652 21201 21500 21294 21531 21157 21609 21152 21538 21269 21565 20998 21650 21177 21542 21099 21666 21127 21561 20832 21293 20930 21221 20806 21200 20829 21344 20754 21751 21257 21521 21120 21643 21064 21568 21100 21298 21139 21564 21017 21479 21143 21495 21052 21481 21184 21431 21056 21512 21031 21456 21212 21383 21015 21419 21198 21516 21131 21509 21077 21472 21298 21315 21106 21443 21239 21328 21181 21601 21009 21402 21231 21610 21076 21396 21383 21373 21142 21603 21088 21262 21272 21491 21090 21367 21319 21363 20996 21499 21088 21361 21243 21584 20809 21372 21312 21079 21374 21265 21303 21196 21455 21318 21281 21512 21307 21301 21323 21415 21377 21152 21386 21297 21534 21287 21683 21341 21447 21255 21575 21479 21248 21358 21527 21316 21264 21387 21576 21281 21401 21398 21440 20952 21530 21330 21544 21296 21408 21327 21505 21141 21594 21252 21607 21122 21589 21206 21399 21059 21622 21176 21394 21120 21680 21416 21388 21105 21543 21200 21396 20951 21671 21207 21472 21169 21553 21217 21548 21084 21450 21137 21432 21129 21480 21283 21524 21060 21562 21168 21509 21166 21576 21177 21443 21185 21513 21239 21672 21156 21545 21099 21496 20969 21376 20995 21570 21126 21589 21088 21527 21196 21561 21144 21541 21272 21479 21107 21447 21167 21541 20931 21429 21283 21657 20952 21283 21108 21488 21164 21345 21143 21319 21288 21165 21020 21278 21128 21405 20934 21208 21017 21727 21185 21335 21149 21561 21366 21331 21105 21352 21474 21488 21284 21317 21264 21536 20999 21363 21212 21303 21414 21322 21231 21605 21541 21430 21255 21385 21643 21312 21545 21121 21495 21466 21481 21299 21218 21210 21459 21365 21340 21031 21309 21379 21585 21226 21230 21175 21593 21277 21497 20999 21358 21384 21427 21191 21379 21202 21391 21221 21546 21153 21296 21046 21440 21280 21460 21160 21252 20995 21488 21204 21385 20985 21430 21048 22297 21688 21911 21303 21753 21447 21845 21376 21595 21284 21740 21424 21829 21312 21809 21383 21825 21489 21738 21193 21655 21416 21745 21337 21730 21458 21706 21280 21760 21403 21617 21269 21781 21304 21837 21321 21606 21393 21636 21442 21704 21301 21714 21249 21789 21256 21696 21222 21682 21201 21751 21239 21964 21376 21626 21377 21578 21393 21616 21378 21693 21303 21650 21359 21579 21344 21713 21245 21699 21424 21525 21285 21708 21276 21692 21312 21576 21312 21664 21406 21550 21469 21670 21353 21508 21461 21591 21265 21609 21164 21621 21303 21764 21313 21668 21289 21416 21379 21617 21616 21434 21448 21568 21280 21824 21285 21787 21382 21483 21632 21536 21361 21777 21360 21568 21572 21688 21398 21431 21354 21787 21496 21543 18388 18165 18503 18707 18667 18487 18800 18743 18813 23031 22697 22260 22016 21769 21897 21516 21518 21664 21605 21413 21704 21421 21675 21517 21575 21414 18186 19121 19328 19182 19368 19460 19560 19424 19796 19350 23033 22210 22244 21799 21678 21608 21701 21473 21664 21420 21716 21392 21705 20791 21371 20897 21392 19941 20782 20297 20786 20343 20809 20416 20816 20327 20771 21312 21467 21251 21475 21162 21927 21543 21632 21504 21552 21385 21762 21304 21693 21235 21856 21216 20312 20189 20723 20486 20817 20539 20849 20603 20941 22164 22177 21581 21755 21415 21744 21192 21643 21099 21737 21284 21657 21272 21556 21090 21520 21230 21682 20589 21072 20802 21143 20899 21082 20843 21242 20741 21409 21122 21346 21095 21648 21355 21660 21415 21620 21401 21625 21213 21593 21179 21509 21125 21484 21244 21632 21286 21656 21227 21622 21387 21362 21336 21769 20624 21578 21440 21495 21252 21577 21220 21403 21446 21344 21000 21586 21173 21275 21170 21221 20950 21384 21206 21258 21069 21644 21022 21231 21300 21248 20921 21287 21418 21073 20992 21482 20980 21214 21280 21231 21278 21216 21221 21080 21682 21613 21475 21158 21388 21132 21179 21042 21356 21207 21189 21139 21281 21273 21162 21133 21406 21088 21266 21148 21425 21152 21335 21221 21384 21020 21286 21237 21460 21080 21785 21207 21390 21156 21015 21189 21455 21071 21334 21094 21427 20992 21184 21143 21520 21079 21275 21152 21488 21140 21336 21061 21506 21060 21313 21035 21486 21134 21394 20957 21556 21112 21431 21045 21515 21177 21393 20977 21561 21184 21334 20838 21488 21188 21432 20904 21461 20898 21504 20864 21363 21049 21511 20900 21350 21029 21457 20953 21424 21060 21382 20998 21399 20967 21376 21034 21572 20830 21347 21107 21383 20821 21465 21043 21480 21007 21334 20936 21450 20919 21273 20967 21428 21118 21436 20992 21415 21104 21449 21143 21495 21176 21658 21265 21363 21063 21434 21085 21592 21016 21341 21092 21577 21239 21357 21080 21450 21193 21464 21171 20885 21094 21427 21232 21433 21180 21331 21191 21551 21304 21199 21072 21485 21127 21536 21090 21543 21146 21402 21401 21452 21277 21233 21120 21654 21400 21253 21223 21369 21262 21659 21193 21903 21099 21368 21487 21575 21221 21248 21229 21431 21363 21223 21296 21290 21510 21318 21314 21155 21331 21384 21519 21278 21357 21191 21361 21468 21437 21261 21264 21249 21335 21403 21355 21288 21293 21237 21392 21308 21413 21248 21271 21196 21507 21287 21536 21174 21259 21162 21463 21193 21547 21145 21342 21131 21537 21248 21562 21134 21346 21024 21504 21317 21569 21188 21335 21161 21434 21225 21476 21052 21280 21048 21527 21130 21606 21012 21200 21170 21744 21143 21522 21008 21487 21249 21531 21304 21525 20936 21447 21277 21667 21188 21453 21026 21505 21198 21569 21204 21436 21047 21568 21164 21643 21148 21415 21168 21453 21127 21529 21079 21496 21088 21433 21284 21415 21139 21490 21114 21623 21068 22052 21080 21662 21058 21654 20983 21523 21124 21633 21068 21495 21130 21543 21248 21316 21131 21460 21048 21525 21096 21481 21130 21522 21168 21509 21162 21498 21144 21741 21175 21520 17637 18392 18320 18832 19241 19610 19105 19287 19015 19474 22625 21192 21065 21585 21195 18599 19998 20425 20315 19335 19453 20343 20357 20637 20224 22806 21861 21976 21974 21600 21696 20257 20352 20969 20357 20824 20375 20709 20690 20583 21289 21305 20935 21233 20937 21588 20493 21146 20736 20849 20504 21031 20761 20720 20925 20724 22216 21848 21111 21008 21056 20982 20896 21022 20860 21009 20904 21047 21048 21056 21080 20983 21288 21092 21302 20842 21362 20979 21345 21107 21206 21111 21500 21192 21172 21109 21175 21143 21360 21061 21467 20825 21387 20918 21403 21112 21337 21172 21405 21143 21383 21171 21392 20945 21489 20913 21482 21079 21420 21120 21300 21061 21454 21033 21504 20835 21527 21009 21466 21093 21472 21116 21344 21045 21458 21064 21600 20935 21580 21058 21346 21006 21325 20929 21470 21024 21513 20945 21428 21070 21265 20988 21475 20995 21528 20871 21454 20848 21488 21122 21312 20986 21408 21033 21533 20849 21399 20971 21443 21111 21263 21007 21329 21072 21431 21019 21769 21015 21507 21276 21424 21126 21389 21205 21531 21221 21540 21100 21656 21222 21402 21206 21687 21140 21579 
39394 33264 40192 42306 38365 41673 39096 42502 37655 42154 39124 42658 39225 33060 40038 32743 38889 41654 38880 32828 38119 42016 38160 42209 37863 42693 38135 41175 39527 42100 40407 41476 42329 40617 34871 40654 33784 41216 42215 42135 33601 41719 40688 41074 33298 39571 33504 39952 42497 41126 41612 42836 41813 42691 40251 42289 40373 43112 41504 42345 41942 41367 43431 41840 33216 39897 33248 38976 34258 40822 41893 40273 42535 42887 41559 41387 41537 41239 42826 39628 34531 37868 33202 37101 33940 40011 42880 40768 42389 40844 41501 40832 33068 38625 34501 39769 33842 38453 33954 39155 42179 40248 42359 40201 33376 38331 33728 38711 34201 38966 33137 39685 40640 40984 39031 39441 38864 41961 40342 41836 37507 40637 38501 41738 39392 41779 36032 39963 39703 41793 38299 40183 36479 40024 40138 41867 39026 39792 41136 41969 37893 42528 37697 39540 36324 42067 38136 42032 37344 38272 36274 33152 38056 41440 36320 38639 37362 42368 38521 42416 34600 40304 36626 41688 38753 40832 36071 40265 37544 41671 36616 41427 35866 42192 35890 33011 36021 42658 35860 40515 37603 41735 37185 42311 35912 34970 35288 38976 34583 39216 35859 40421 38629 42389 41330 41588 35768 37039 34035 35532 40384 34147 42352 35302 32841 33587 40530 34923 42681 35032 39408 42593 42192 35072 33822 42472 39642 43317 33973 33824 41305 43361 35223 32832 40548 33717 34805 40987 40636 42694 34743 39584 34720 33252 41800 34352 34804 41891 34893 41276 35894 33242 33186 33044 42480 33928 41749 33530 32797 42183 43561 43265 43049 34168 41280 33664 34310 42169 34953 41986 36437 40360 35856 41787 34784 42528 34612 42192 34075 42609 35081 41880 35760 41496 36328 39760 36252 40813 35062 41657 35696 41236 35458 41108 35725 40762 36471 40632 36216 40409 36809 40359 36485 40728 35052 40544 35846 40306 35721 40379 36160 39975 35617 40552 35856 33611 35350 33433 34176 39899 36032 40420 34585 39911 40496 37893 41424 39897 32955 37845 39973 34381 38880 36352 40192 37445 37893 37293 41336 36960 41258 35664 39984 37543 33809 34306 33290 39968 42971 41216 35830 41268 40796 33013 42101 34352 41500 39972 34378 40582 41287 39367 41713 42805 39204 42022 40914 43065 42304 41264 39944 42289 41516 40787 41290 41330 39602 41357 39032 39792 40527 39051 38582 41474 36624 31805 35561 35883 37185 41256 36445 40569 39332 39052 37120 37171 36086 34681 33248 39751 36142 40310 35105 41195 36081 38688 34874 33194 39461 41488 37872 40856 38962 42076 38520 40587 38767 40945 35402 42348 38232 40904 35993 41537 35888 41131 36768 38173 37051 41146 34585 41257 37494 41046 37120 42257 35104 40274 36424 40808 36155 40468 37549 39330 35534 42924 36439 40843 38620 41637 38406 42048 36086 40396 37254 40472 35696 40176 36330 40871 37690 40811 36648 40384 38999 40341 37768 42468 38585 40773 39831 39769 37490 40489 37606 39132 38291 42404 36451 40026 41914 41331 38085 42646 36935 39746 41045 39028 37251 40720 38460 38970 40890 39734 37164 39654 41392 38108 40277 40350 39921 38886 33664 39697 41643 40297 40870 38696 40128 38935 40648 39128 41623 39001 39203 40724 42096 36697 40583 39723 41794 36891 42261 39488 40710 37700 42483 38755 41432 39367 42562 37609 41176 39176 33417 36179 41661 38610 42304 38670 42480 39160 41696 36871 42880 39264 41126 36449 33340 38006 41266 36916 41744 38817 41648 37255 42272 39185 35860 36626 42000 37093 41666 36984 42244 36672 41483 37192 42801 35200 41024 38221 42155 39432 41385 38170 42384 40427 32159 40328 35304 38529 33904 42323 35354 41227 34608 34378 37906 39559 41291 39392 33197 36247 41227 38233 42544 37961 41005 38376 43156 37316 39664 39280 34343 38048 40551 39129 42564 39962 41736 39276 43221 40487 40272 38024 40448 40477 39604 38841 41461 39973 37774 39492 41187 41125 39124 39712 39833 41692 40675 37905 40179 40778 41940 39732 39424 41695 41749 41097 37408 41216 40087 42675 39364 40838 40456 42440 39149 38640 39733 42405 39633 40832 38293 42321 39695 42402 37603 41897 39407 33506 37448 36904 39194 42743 37888 39901 37801 32867 39936 32948 35576 42283 40136 42276 37721 36492 38465 33048 38152 42167 36213 42120 37412 33299 37528 41728 38341 41840 38777 41684 37777 42480 38176 33144 35938 41280 36448 32790 37159 40768 36704 40448 39368 41827 37740 41856 38006 41352 39943 40906 37056 41432 38647 42917 37047 41160 39176 33154 38171 33942 37530 41088 39041 42600 38216 41728 38562 33117 39001 39292 39444 41586 41609 40455 43098 42018 39850 35817 41408 42818 40026 41113 42209 42188 42357 41648 40081 35313 40934 41361 39760 42581 33934 39041 43094 42907 42282 40096 42071 42017 33681 39382 42067 42498 42266 38482 33339 34701 35285 35680 37433 34816 35036 34394 37472 34771 42567 43265 42674 40352 32885 38935 42231 40488 42166 41607 40474 41398 42752 39367 42837 38743 42864 39137 42856 36972 34247 37224 33639 37633 42421 38378 42056 39432 41639 38897 40344 40503 41281 38912 43136 37920 34872 36992 32921 37188 43189 39622 41741 39002 41701 39106 41898 38564 42080 38521 43018 38033 43226 40459 42278 38359 41616 39864 43017 37634 42381 37747 42018 38851 41590 39400 41312 39251 41883 38672 42804 37248 41400 39824 42829 39047 33088 37735 42856 38234 42121 39042 42160 36208 33222 39180 34230 38835 42917 39780 40872 39360 39452 39512 42628 40976 35776 41412 40996 42435 40304 42072 41864 42320 40401 41948 41656 40448 40667 38969 41622 39748 33079 39734 42433 39641 41520 42964 39232 33559 40152 33139 39840 42066 41637 40313 42023 42320 40951 42456 38896 42229 41632 42528 41532 33577 41408 41765 41138 34460 38566 35397 39424 33990 40770 42500 40266 33579 38884 34080 40000 42362 40709 33768 39585 34256 38579 33345 39864 41846 39549 34009 39848 34647 39746 43205 41207 33481 39280 34307 39057 33245 40324 33911 37472 34482 39584 33426 38803 34752 39047 33690 35609 40832 37056 40193 35758 39693 36147 41133 35063 35872 40296 33104 38602 34631 38231 33496 38726 40853 39389 33756 37735 42926 39638 43221 38612 42924 39815 42509 38384 32875 37963 42364 40353 41934 38168 42272 40250 33127 39040 32955 38400 42582 41024 41218 39050 42465 40772 41189 40064 34126 37549 41931 40751 34364 38369 41803 42018 42112 39492 34220 38402 40564 40630 43114 38925 41861 41426 41813 37729 43168 38825 41590 40795 33846 35616 41656 41024 38902 41952 40588 41197 40086 42885 41349 40772 32999 40881 41072 41430 42392 41784 39408 41835 40984 33515 40672 35176 41376 42725 40692 34011 42711 40319 41826 33460 40768 40448 41993 33904 40395 42084 42112 42395 37430 33172 40912 33446 40456 41960 41623 32948 39051 34084 40049 34389 38765 34008 39856 42088 38584 34445 39472 41819 39008 34880 41879 41988 39083 33531 39575 41874 37577 34967 40022 42656 39763 33524 39881 33538 38519 42520 39353 42319 39350 42842 40951 33176 38106 33639 39228 32960 39453 33770 39547 42477 39914 33079 40323 34912 39236 33472 38801 42995 37768 41424 37785 33587 38885 33991 38400 33266 39712 33706 39040 33400 40268 43048 39240 42631 40032 33456 36871 42226 40918 34857 37105 40655 39056 42807 39801 41452 39579 41301 40858 39815 38056 40759 39168 42168 37295 39960 38025 35795 39592 41497 39669 33728 41473 41426 39076 41499 42864 43011 40884 41261 40453 33211 37562 41633 40328 41181 42262 41362 40725 34325 33173 42033 40672 41902 34816 40685 33555 38728 43179 42962 43161 41161 40247 40211 42726 41929 41609 38345 41192 41829 34019 40098 40546 39920 34140 40576 43219 38017 41707 41829 42466 40172 41783 40045 42137 40435 33547 39136 40749 38400 42210 40690 42676 39644 40312 37735 42744 40168 41881 37913 42304 38416 41616 35200 37494 41033 36096 42455 37046 41393 34316 40456 35893 41925 36819 40785 36428 41734 36662 42805 35953 39811 34870 41867 35917 41269 35661 42347 35516 40368 35706 41952 34452 40384 36168 40808 36969 41105 34360 41568 34496 42100 35381 40833 35449 40077 36360 40214 35089 40104 35027 39756 36070 40460 38242 41456 34629 41382 33967 41553 34316 41360 35445 40944 34641 41654 34103 41049 35456 40537 35332 41889 33348 40528 35458 40524 35285 40704 33829 40625 34728 41933 33766 42624 35079 41415 32968 42369 34304 40210 34352 39430 34475 40886 35856 40864 34880 40658 42176 41896 34441 33992 42128 42589 33720 40273 36481 40683 36341 41630 43175 34440 32896 41280 36051 41351 33638 33424 34804 41728 42593 41779 36395 42885 33680 40358 38596 31616 33429 33348 31148 34407 34131 35008 39284 35604 41175 38512 35926 37264 32967 32857 34351 34008 41874 35387 42166 35229 32981 33613 41850 38624 38182 40154 39244 40804 31639 32512 40950 35556 40466 39493 40730 41232 36519 35015 33979 35089 42498 34816 42024 35545 41508 35482 35475 41740 36728 41580 37331 35453 40696 35448 41344 35856 41713 35760 41169 35371 40719 42957 40555 42928 39777 37898 33472 33947 32417 33015 41495 35848 40784 35430 40271 36891 39920 41006 40064 34970 31768 35415 32632 35868 33490 37082 40123 40400 34086 35875 42088 35808 39695 34688 38860 35764 40506 34837 40337 33581 38484 32892 40208 35031 33273 38167 35498 39296 36736 38636 36264 40408 34965 41790 39109 41412 39113 34453 41488 34920 42024 34484 41776 34641 40103 34123 39682 33006 38850 42954 40773 34311 40576 34720 40250 34501 41691 41760 41444 36056 33440 33571 41925 43355 40500 33933 39936 42159 42665 41466 37776 33805 39507 40788 39680 40314 37393 41616 40208 40512 38765 34576 37942 40552 40969 40217 37088 40816 42304 38735 37440 42838 37799 40249 40608 40676 40900 40118 40352 38691 34972 34245 42577 39684 41892 39356 39936 38216 41602 40320 39959 39349 40678 40742 39668 39383 42189 38771 40432 39503 42240 39418 41525 40400 41776 38131 40760 40576 42676 38793 36073 40065 42026 39554 38097 39844 42859 38980 41368 38987 42320 37592 39632 39472 32951 38519 40735 39360 42833 39403 41323 38601 32792 38084 40983 38382 43048 39525 41834 37668 33460 38776 42440 38485 33119 39522 41827 37751 33635 39384 41366 36265 42649 39959 42344 36845 42585 36770 32591 35799 41552 38496 33064 36364 41397 38223 42512 37539 42011 38512 41728 37827 42021 37783 41433 38281 33647 35873 41344 39158 41878 36045 42587 38449 42784 38200 41318 37179 42449 37240 40579 37721 42168 39440 42450 37608 42192 38977 42537 39638 43232 39884 34816 40251 41760 38730 42384 39056 33971 37632 41504 38887 33860 40360 41832 38769 42530 40118 42683 39865 36733 38791 42291 40389 42468 39991 41376 40128 33792 40680 40288 38492 43055 39448 33159 38457 33464 39142 42010 42168 42752 40982 40448 38947 34701 41670 40517 40484 41881 40753 34963 39764 37609 39000 41680 43352 34124 40049 40178 40561 42549 41899 40536 40813 40935 33069 40857 41093 39576 41364 41814 33449 40528 41827 40140 41664 42920 42775 40779 40432 40281 41556 42255 41890 40877 41101 40597 41785 41226 42277 40290 40790 40080 32997 40608 33212 39464 40589 39656 42858 40132 33649 39144 41568 39424 33284 39858 33729 39096 41408 37963 32644 40832 33747 39536 41486 39703 42445 40503 42861 38580 40546 38331 33282 38921 34228 37576 39800 39638 35712 39304 33048 37376 43109 40448 33448 40667 33269 36824 42485 40976 34977 39597 42712 38164 32784 39795 33680 39721 42496 38592 33524 39376 34680 39220 42308 39624 42744 39428 33288 38534 42984 38807 42404 40848 42368 39461 42956 39329 34589 38368 38840 38635 34900 38148 34656 37680 33074 38753 34322 38362 43152 39378 33550 39876 41079 39404 42608 38432 33160 38562 42906 39369 33054 39197 32967 39315 43140 39477 35866 39716 32952 32503 40322 39802 35035 39360 33462 37836 40097 37345 31664 34316 39603 38578 33835 39826 32753 37515 42140 41351 40681 42084 41684 41576 34056 39556 36753 36995 38182 38280 33936 34786 40140 41218 37684 41372 35958 41586 34858 34192 33129 40568 41144 37352 40252 37248 33832 31920 39050 34614 35972 31986 37898 35121 34512 36981 34724 40607 36900 39113 37654 38171 37694 36445 38001 36400 37634 36640 38327 38232 38192 38605 37830 40684 38829 40993 36262 41462 37796 41352 39152 40110 39249 43152 40033 39684 39124 39866 39498 41523 38598 42850 36160 41785 37077 42032 39168 41430 39741 42186 39600 41900 39837 41741 37305 42836 36987 42823 38971 42249 39031 40896 38572 42679 38339 32673 35792 33132 37488 42656 39056 42589 39349 41303 38432 42512 38580 33969 37004 33794 38091 41348 38024 41306 37088 42797 38018 32981 36915 42119 38827 40453 37904 42792 37845 33068 36201 42530 36224 42657 39148 40904 37879 41817 38320 33369 35912 41908 37818 42389 39360 40744 38112 41158 38532 42438 38249 35915 37896 32864 40394 42150 39288 41975 40251 33424 40032 33336 38712 34656 40082 42096 40248 35296 39065 33975 
23632 23472 23632 23498 23475 23465 23505 23467 23373 23431 23457 23443 23357 23527 23445 23539 23279 23449 23376 23488 23326 23537 23427 23613 22663 23553 23903 23419 23440 23365 23456 23246 23305 23363 23574 23403 23745 23356 23861 23122 23677 23528 23473 23547 23362 23389 23394 23480 23276 23432 23476 23484 23383 23592 23235 23581 23213 23574 23175 23670 23367 23504 23429 23505 23337 23428 23481 23369 23217 23413 23303 23488 23298 23578 23217 23624 23106 23669 23131 23537 23240 23639 23349 23305 23232 23529 23313 23586 23177 23781 22949 23647 23077 23621 23221 23643 23253 23513 23212 23605 23061 23683 22894 23731 23005 23576 23165 23521 23229 23473 23374 23587 23116 23708 22923 23641 23091 23525 23188 23579 22966 23540 22987 23570 22993 23607 23021 23548 23091 23389 23081 23561 23079 23555 22977 23602 22996 23574 23061 23448 23218 22868 23017 23569 22993 23634 23056 23576 22936 22724 23331 23138 23439 22900 23279 22854 23441 22977 23453 22959 23257 22774 23441 22961 23447 22843 22661 22829 23264 22940 23444 22793 23303 22841 23400 22949 23316 23141 23256 22791 23370 22981 23245 18377 20010 19939 20532 20280 20596 20387 20830 20517 21005 25723 24916 24243 24432 23876 24182 23638 24033 23697 23932 23872 23927 23507 23801 23603 23898 23719 23810 23501 23808 23810 23922 23426 23633 23511 23989 23386 23622 23571 24036 23447 23651 23501 23978 23507 23639 23603 23751 23744 23672 23836 24039 23932 23537 23830 23753 23773 23652 23591 23712 23692 23610 23748 23507 23885 23489 23823 23596 23913 23504 23895 23452 23898 23526 23805 23603 23665 23556 23830 23458 23973 23335 23964 23431 23964 23447 23879 23400 23950 23463 23725 23456 23260 23495 23809 23418 23979 23368 24014 23268 23993 23361 24020 23424 23800 23386 23800 23375 23783 23399 23833 23409 23793 23372 23888 23398 23821 23401 23873 23400 23809 23389 23733 23464 23703 23381 23789 23495 23735 23373 23331 22848 23127 23047 23314 23031 23271 23687 23951 22785 23269 22771 23276 22972 23197 22666 23183 23012 23041 23007 22917 23092 23697 23172 23761 23232 23396 23414 23245 23311 23349 23370 23729 23532 23304 23266 23430 23317 23296 23208 23410 23702 23340 23447 23202 23546 23239 23200 23244 23213 23081 23365 23030 23306 23218 23003 23117 23255 22913 23399 23019 23109 20206 21037 20997 21425 21175 21421 22059 22694 21020 22679 24711 24020 23828 24113 22659 23396 22978 23018 23882 23456 22597 23408 23218 23267 22914 23485 22881 23477 23045 23301 22927 23521 22731 23303 22752 23306 22748 23344 22841 23211 22745 23317 22676 23175 22821 23192 22679 23533 23424 23403 22804 23241 22736 23426 22674 23296 22877 23158 23879 23979 22848 23241 22888 23307 22858 23224 22928 23037 22784 23286 22692 23238 22843 23085 22848 23270 22652 23117 23019 23197 22852 23200 23123 23216 22988 23322 22904 23189 23143 23092 22987 23321 22840 23082 23065 23345 22849 23054 23175 22992 22957 23385 22861 23091 23149 22881 23247 23040 23079 22897 23257 23006 23058 23106 23325 22881 23047 23257 23186 22986 23304 22991 23163 23084 23279 22787 23328 22993 23179 22914 23424 23043 23084 22949 23351 22917 23333 23052 23417 22715 23355 23060 23358 22676 23492 23008 23252 22863 23497 22843 23153 22976 23477 22829 23302 23086 23351 22836 23324 22986 23355 22743 23351 22796 23511 22876 23349 22855 23474 22903 23242 22904 23260 22784 23325 22887 23287 22800 23356 22845 23408 22804 23450 22843 23306 22927 23328 22940 23300 22855 23296 21789 22808 22062 22604 22129 22505 22088 22516 22196 22464 24082 24168 23239 23208 23056 23570 23204 23256 23090 23271 23232 23157 23204 23337 23250 23080 22945 23183 23397 23131 22999 23212 23207 23189 22945 23129 23253 23263 23026 23116 23077 23468 23143 23098 23029 23137 23001 23020 23351 23168 23320 22949 23325 23257 23192 22961 23228 23201 23230 22923 23239 23132 23445 22953 23158 23002 23538 23117 23111 23104 23384 23017 23330 22917 23434 23041 23316 22823 23318 23040 23448 22998 23077 22952 23563 22940 23228 22894 23492 22950 23465 22797 23321 22941 23543 22888 23232 23046 23392 22929 23208 22850 23457 22852 23504 22796 23326 22870 23377 22901 23340 22864 23351 23035 23528 22633 23348 22922 23383 22913 23223 22725 23310 22944 23384 22964 23269 22904 23401 22907 23433 22921 23296 22967 23399 23041 23283 22858 23408 23040 23341 22958 23384 23020 23262 22896 23261 22985 23401 22806 23373 23047 23300 23257 23218 23001 23347 23136 23533 22902 23198 23055 23335 23527 23358 22854 23252 23052 23536 22965 23227 23105 23367 23505 23268 23248 23257 23206 23660 23099 23227 23543 23261 23372 23113 23611 23250 23435 23239 23502 23164 23184 22529 22743 22418 22613 22675 22678 22263 22855 22489 23823 23140 23584 23020 23500 23258 23258 23156 23470 23031 23477 23104 23531 22929 23556 23008 23435 23069 23410 23139 23118 23041 23184 23005 23425 22967 23416 23020 23514 22819 23511 22923 23446 22728 23559 22964 23425 22956 23451 22915 23667 22875 23335 22944 23409 22997 23477 22992 23424 22781 23353 22903 23429 22978 23369 22916 23376 22858 23485 22767 23418 22905 23308 22995 23392 22996 23315 22838 23369 22428 23374 22970 23321 23048 23290 22988 23395 23014 23402 23060 23431 23081 23337 23084 23237 23173 23319 23020 23335 22911 23394 23105 23505 22979 23532 23027 23587 22983 23464 22968 23653 23076 23636 23111 23574 23147 23535 23068 23613 23043 23474 23058 23237 23301 23399 23195 22708 23456 23045 23531 23296 23387 23255 23145 23313 23362 23200 23373 23118 23492 23249 23367 23315 23340 23268 23552 23064 23599 23017 23535 23207 23113 23315 23456 23113 23655 22915 23579 23105 22967 23281 23437 23159 23633 22947 23561 23146 23377 23179 23588 22835 23687 23057 23596 23149 23548 23043 23666 22994 23509 23201 23378 23200 23574 22929 23517 23133 23505 22929 23526 23095 23542 22540 23110 22656 23089 22777 23156 22580 23210 22509 23161 23155 23548 22977 23579 23026 23495 22949 23536 23062 23460 23032 23319 23099 23564 22922 23383 23072 23412 23001 23424 23137 23463 23027 23472 22897 23393 23114 23531 22976 23388 23161 23291 23131 23616 23012 23381 23170 23465 22970 23356 23298 23495 23255 23515 23123 23235 23207 23303 22982 23344 23395 23164 23104 23570 23050 23164 23163 23319 22812 23137 23332 23322 23201 23371 23091 23106 23433 23200 23140 23162 23417 23072 23271 23302 23332 23481 23445 23384 23255 23184 23505 23159 23392 23232 23527 23112 23562 23344 23564 23058 23499 23411 23663 23098 23677 23360 23424 23187 23766 23312 23409 23122 23609 23252 23532 23296 23753 23251 23861 23145 23638 23111 23503 23213 23723 23040 23478 23057 23585 22901 23311 23275 23493 22930 23504 23177 23706 22875 23518 23232 23489 23116 23552 23189 23682 23020 23603 23105 23544 23372 23560 23189 23531 22885 23566 23101 23697 23128 23631 22983 23574 22993 23512 22906 23601 22885 23448 23066 23745 23144 23949 23072 23547 23040 23261 22921 23447 23033 23470 23111 23467 23250 23546 23037 23451 23191 23623 23077 23441 23054 23552 22998 22798 23099 23569 23218 23204 22956 23232 23089 23191 22943 23236 22993 23426 22832 23147 22992 23424 23052 23104 22943 23236 23361 23336 23046 23351 23340 23341 23149 23325 23174 23677 23185 23161 23025 23384 23394 23217 23153 23353 23198 23705 23074 23394 23648 23392 23563 23284 23571 23369 23672 23369 23458 23296 23490 23265 23340 23244 23340 23389 23397 23154 23153 23116 23417 23260 23350 22948 23341 23316 23517 23063 23168 23095 23381 23228 23396 23040 23557 23175 23552 23124 23396 22759 23342 23054 23495 22999 23224 22781 23271 23033 23450 22876 23249 23251 23382 23829 24105 23527 23961 23436 24044 23562 24046 23330 23929 23552 23956 23564 23885 23890 23873 23637 24007 23535 23714 23365 23963 23470 23969 23401 23684 23372 23956 23382 24010 23254 23843 23509 23913 23505 23884 23815 23862 23446 23984 23475 24033 23402 23865 23421 23963 23485 23755 23372 23833 23465 23789 23424 23814 23416 23933 23321 23779 23415 23974 23318 23778 23427 23947 23305 23776 23475 23912 23479 23808 23385 23754 23414 23840 23525 23744 23527 23815 23410 23857 23466 23859 23507 23886 23465 23716 23532 23761 23638 23706 23716 23745 23566 23741 23381 23835 23432 23962 23520 23745 23420 23488 23696 23648 23746 23703 23352 23796 23413 23957 23512 23689 23700 23735 23470 23707 23722 23837 23537 23556 23376 23959 19431 20092 20018 20089 20600 20448 20537 20327 20948 20687 25611 24779 24786 24273 24151 24228 24311 24032 24154 23975 23472 23833 24068 23754 24043 23865 23821 20068 20860 20741 21399 21547 21476 21258 21537 21376 21594 24907 24920 24184 24487 24488 24294 23853 24194 23911 24087 23849 23968 23778 23326 23105 23393 22999 22554 22196 22480 22223 22615 22218 22495 22232 22605 23463 23607 23298 23573 23069 24215 23733 24029 23633 24143 23339 24075 23345 24068 23488 24043 23509 23981 21879 22656 22043 22839 22221 22873 22152 22727 22459 24423 23912 23882 23526 24068 23346 23959 23339 23947 23414 23879 23224 23731 23292 23961 23561 23797 22596 23134 22774 23126 22856 23233 22689 23152 22754 23106 23032 23388 23094 23506 23332 23738 23384 23614 23334 23775 23224 23720 23241 23637 23367 23575 23303 23776 23698 23667 23300 23545 23452 23760 23276 23644 23520 23564 23456 23672 23280 23656 23351 23425 23116 23601 23153 23239 23518 23602 23080 23553 22941 23165 23232 23117 22992 23303 23347 23301 23041 23440 22963 23241 23159 23281 23003 23158 23277 23047 23079 23364 23010 23080 23233 22956 23480 23538 23749 23194 23452 23215 23272 23071 23161 23181 23232 22965 23206 23088 23269 22841 23349 23270 23216 22938 23336 23116 23197 23003 23360 23057 23143 23040 23269 23081 23228 22894 23387 23009 23146 22973 23408 23068 23245 23090 23365 23077 23272 22878 23589 23141 23343 23075 23588 23085 23392 23019 23481 23068 23454 22962 23505 23023 23526 22784 23415 23097 23515 22795 23405 23000 23452 22887 23317 23127 23434 22905 23461 23072 23534 22924 23556 22917 23507 22907 23560 22855 23435 22922 23329 22877 23397 22976 23300 22854 23346 23040 23238 22798 23453 23012 23401 22403 23473 22873 23416 22924 23413 22837 23505 22732 23356 22796 23429 22967 23372 22836 23383 23033 23362 23386 23284 22939 23466 23012 23303 23038 23596 23324 23648 23072 23397 23132 23594 23191 23415 23012 23462 23222 23737 23040 23444 23118 23543 23180 23399 23127 23383 23158 23538 23034 23219 23081 23508 23431 23447 23152 23432 23236 23530 23354 23233 23091 23431 23182 23624 23124 23612 23228 23342 23452 23653 23124 23384 23213 23541 23490 23304 23120 23464 23239 23652 23161 23522 23079 23399 23417 23608 23045 23316 23404 23444 23348 23168 23119 23271 23565 23272 23356 23119 22839 23271 23593 23353 23378 23051 23372 23303 23461 23368 23383 23153 23333 23356 23465 23237 23284 23266 23459 23299 23547 23226 23382 23159 23472 23313 23552 23201 23416 23020 23484 23301 23618 23223 23449 22996 23484 23205 23568 23184 23468 22931 23502 23180 23572 23097 23324 23127 23461 23126 23594 23079 23333 23014 23765 23150 23660 23088 23463 23068 23797 23173 23680 23097 23574 23093 23646 23184 23623 23040 23628 23147 23763 23172 23613 22938 23687 23040 23688 23104 23606 22787 23559 23045 23641 23112 23545 23029 23560 23157 23600 23072 23615 23114 23600 23028 23552 23025 23587 23105 23703 23063 23544 23101 23581 23093 23516 23057 23574 23095 23595 23024 23564 23041 23516 23169 23619 23063 23436 23150 23438 23151 23456 23133 23453 23070 23493 23157 20040 21153 21830 21117 21455 21028 21231 20655 21222 25768 25014 23191 24512 23760 23708 21796 20898 22073 22224 20965 21466 22030 22430 22304 22302 25016 24559 24276 24378 24027 21287 22007 22625 22432 22499 22616 22451 22360 22493 22381 23372 22937 23367 22928 23169 22946 22725 22738 22653 22862 22420 22779 22565 22916 22514 23308 23765 24160 22950 23120 23129 23019 22784 23013 22817 23021 22643 23055 22645 23023 22862 23156 23015 23140 23036 23134 23047 23167 22978 23144 23063 23253 23013 23358 23328 23429 22824 23436 22933 23428 23077 23396 23175 23366 23059 23321 23089 23516 22993 23465 22793 23557 23060 23464 23061 23481 23074 23348 23064 23564 22641 23612 22833 23603 23056 23446 23138 23289 23193 23463 22920 23600 22893 23624 22965 23453 23123 23413 22886 23588 22839 23586 22772 23485 22923 23390 22944 23920 23009 23447 23009 23448 22904 23392 22904 23431 23000 23431 22912 23392 22895 23591 22970 23404 22861 23493 22964 23770 22994 23353 23058 23463 22920 23397 23054 23310 23276 23990 23201 23755 23202 23655 23108 23668 23253 23574 23467 23485 23296 23825 23312 23734 23189 23653 23427 
22259 23040 22103 22997 22075 22817 22005 22707 21945 22684 21956 22725 21829 22697 21997 22684 22023 22565 21978 22597 21931 22593 22100 22717 21935 22859 22005 22748 22397 22743 22006 22935 21885 22629 21925 22697 22137 22635 22210 22484 22161 22466 22111 22536 22153 22306 21927 22428 21939 22599 21929 22669 21782 22736 21900 22609 21464 22503 21857 22549 22009 22542 22044 22390 22167 22375 22112 22664 21992 22306 21911 22451 22208 22496 21925 22515 22022 22412 21810 22406 21922 22306 22020 22443 22053 22471 22052 22497 21984 22605 21697 22429 21799 22424 22202 22256 22427 22396 21976 22171 21964 22805 22009 22469 21863 22223 22326 22148 22336 22132 22008 22411 21952 22642 22144 22417 21936 22151 22484 22038 22291 21985 21952 22604 21857 22681 21849 22038 21982 22225 22194 21867 22449 21907 22485 22105 22519 22147 22226 22157 22520 22140 22469 21955 22291 22200 22183 22349 22161 22246 22295 22002 22480 21831 22532 21868 22614 22065 22252 22203 22209 22320 22460 21888 22551 21803 22725 22061 22388 22165 22119 22146 22442 21944 22651 21927 22625 21883 22624 22060 22551 22055 22425 22062 22618 22273 17967 18443 17760 18498 18290 18951 18496 23944 23283 23799 23250 23847 22968 23213 22773 23406 22928 23352 22576 23059 22523 23238 22836 23058 22275 23064 22639 23243 22436 22679 22469 23192 22547 22695 22409 23089 22432 22771 22233 22944 22417 22784 22221 22973 22386 22807 22249 22903 22208 22954 22104 22745 22264 22159 22351 22703 22091 22864 22312 22912 22183 22881 22263 22888 22208 22774 22104 22792 22184 22613 22180 22603 22247 22778 22243 22653 22280 22727 21987 22712 22242 22976 22126 22752 22291 22398 22412 22427 22683 22361 22695 22415 22549 22421 22257 22479 22104 22455 22138 22365 22102 22470 22257 22592 22153 22405 22237 22592 22552 22401 22530 22488 22603 22528 22555 22541 22481 22599 22528 22375 22622 22331 22683 22303 22764 22246 22745 21731 21965 21608 22245 21665 22408 21378 22993 21606 22135 21400 21954 21484 21908 21504 21658 21521 21885 21326 22168 21169 22551 21856 22582 22072 22428 22176 22391 21862 22589 21908 22797 21992 22528 21666 22461 21697 22415 21788 22288 21826 22311 21685 22449 21698 22359 21729 22194 21632 22280 21477 22389 21417 22025 21468 21949 21504 22060 21511 21989 21621 22296 18518 19021 18471 19317 19055 19345 20004 20596 19079 23639 23395 23059 22765 23396 21859 22050 22125 21993 22829 22584 21772 22160 22568 22114 21830 22472 21685 22000 22178 21984 21824 22424 21552 21848 22182 21984 21696 22228 21783 21662 21793 21661 21949 21966 21981 21703 22153 21916 22224 22123 22064 21773 22085 21992 21787 21942 22016 21539 23085 22539 22136 21890 22512 21686 22032 22067 22327 21576 22201 21680 22299 21826 22148 21496 22343 21712 21973 21789 22473 21461 22309 21837 22380 21622 22537 21728 22254 21783 22308 21452 22394 21941 22193 21792 22445 21656 22377 21679 22464 21324 22369 21731 22136 21596 22404 21577 22088 21874 22474 21580 22388 21726 22125 21527 22492 21669 22226 21834 22302 21632 22275 21786 21829 21780 22368 21580 22104 21827 22213 21689 22122 21849 22151 21669 22285 21730 22256 21808 22305 21511 22153 22016 22219 22074 22115 22154 21937 21762 22169 22137 21922 21839 22400 21832 21974 21756 22392 21582 21935 21952 22521 21680 22102 22103 22321 21713 22071 22264 22320 21948 22259 22103 21697 22208 22028 22230 21704 22273 22058 22061 21507 22209 22202 21931 22092 22222 22127 22074 21801 22432 21991 21132 20573 21336 20988 21046 20750 21398 20883 21121 20690 23456 22660 22723 22113 22882 22341 22586 21867 22693 22128 22572 21673 22664 22109 22614 21708 22624 22051 22537 21675 22538 22112 22585 21710 22469 22016 22595 21750 22572 21671 22530 21921 22627 21650 22380 21984 22213 21604 22324 21906 22378 21636 22496 21712 22523 21786 22278 21790 22436 21773 22245 21865 22416 21824 22413 21729 22529 21940 22263 21770 22288 21940 22389 21845 22183 21935 22452 21625 22208 21915 22465 21968 22284 21948 22327 22047 21999 21808 22264 22221 22317 21913 22125 21868 22631 21998 22046 21836 22248 22248 21853 21810 22054 22153 22549 21775 22068 21911 22250 22152 21959 22158 22230 22437 22016 22265 21977 22342 22039 22161 22018 22233 22151 22433 21856 22120 22144 22324 22103 22135 21753 22380 22152 22441 21892 22055 22040 22538 22017 22342 21943 22439 22045 22459 21755 22316 22061 22471 21979 22168 22049 22499 22104 22630 21741 22413 22060 22746 21955 22452 21815 22663 22137 22614 21874 22120 22097 22584 22073 22231 21797 22663 21978 22787 21974 22697 21905 22720 22056 22535 22057 22611 22124 22688 21972 22694 22039 22445 21808 22597 21816 22387 20856 21587 21031 21438 20984 21620 21090 21552 21192 22245 21912 22568 22005 22520 22116 22291 21884 22510 21959 22622 21783 22424 21860 22371 21954 22261 22105 22195 22253 22208 22188 21997 21970 21958 21928 22183 21783 22656 21820 22598 21817 22478 21747 22096 21809 22024 22185 22106 22394 22200 22399 22197 21985 22269 22080 21981 22352 22163 22404 21987 22249 22235 22423 22051 22433 21761 22373 22002 22247 22154 22245 22220 22241 21992 22548 21716 22603 21978 22320 22114 22185 22148 22272 22071 22444 21904 22437 21959 22528 21857 22573 21915 22519 21878 22528 22112 22275 22059 22359 22080 22443 21981 22471 21805 22750 21932 22709 21899 22700 22074 22649 22058 22720 21974 22676 22044 22488 21925 22518 21959 22728 21842 22512 21976 22576 22104 22447 21779 22474 21863 22487 21905 22533 21865 22669 21697 22676 21648 22535 22049 22343 22169 22432 21913 22566 21952 22476 21904 22593 22152 22451 21983 22455 21979 22627 21852 22464 21963 22301 22170 22409 21814 22651 21845 22381 22365 22309 22145 22592 22089 22300 22089 22196 22089 22307 21831 22597 21923 22232 22448 22010 21918 22633 21858 22154 22557 22121 21969 22576 22029 22135 21760 21875 21989 21687 21681 21543 22119 21509 21553 21688 22480 22036 22483 22428 22120 22242 22641 22099 22300 22386 22374 21750 22709 22141 22306 22085 22583 21840 22455 22157 22408 22001 22567 22156 22236 22084 22688 21769 22573 22101 22411 21664 22647 22065 22400 22018 22784 21811 22592 22055 22608 21899 22741 22118 22369 22149 22772 21851 22501 22240 22624 21890 22664 22006 22439 21846 22818 21767 22392 21720 22517 21860 22443 21963 22250 21799 22349 21954 22349 21847 22681 21729 22560 21833 22572 21840 22503 22003 22421 21824 22419 22000 22570 21815 22567 22103 22406 22123 22662 22038 22550 22204 22680 22001 22608 22279 22409 21998 22502 22186 22441 21916 22492 21985 22394 22076 22619 22244 22308 21925 22488 21849 22383 22098 22551 21853 22145 21943 22508 21645 21933 21889 22594 21724 22185 22158 22788 21806 22128 22267 22393 22240 22067 22522 22641 22085 22247 22394 22400 22217 22272 22376 21957 22317 22316 22396 21851 22312 22305 22561 22154 22233 22213 22567 22103 22215 22165 22568 22366 22295 22019 22641 22219 22365 21841 22422 22024 22429 21869 22349 22255 22538 21895 22423 22257 22784 22016 22320 22039 22707 22103 22269 21986 22556 22227 22515 21724 22250 21936 22486 21573 22248 21871 22567 21703 22199 21726 22562 21973 22234 21641 22392 22007 22632 21695 22578 22093 22641 21803 22304 22055 22817 21995 22464 22243 22469 21785 22592 21716 22492 21792 22403 21934 22535 22051 22489 22362 22696 22139 22551 21872 22887 21919 22764 21670 22572 21801 22510 21682 22402 21687 22547 21922 22227 21846 22475 21898 22380 21959 22311 21913 22535 22034 22189 21796 22351 21916 22343 21793 22133 21707 22343 21943 22400 21781 22187 21765 22322 21904 22155 21522 22123 21883 22304 21953 21888 21789 22128 22837 23203 22689 22919 22666 22912 22830 23001 22338 22719 22444 22777 22898 22610 22576 22534 22336 23173 22633 22562 22296 22608 22792 23065 22331 23095 22235 22560 22858 22642 22274 22371 22529 22981 22768 22067 23040 22568 22884 22532 22712 22296 22633 22553 22785 22368 22500 22482 22877 22583 22666 22177 22585 22598 22702 22450 22393 22409 22768 22435 22445 22416 22838 22343 22600 22600 22625 22009 22940 22166 22736 22494 22495 22409 22720 22220 22818 22241 22856 22161 22877 22182 22937 22033 23008 22020 22997 22147 22900 22173 22776 22343 22540 22337 22595 22325 22813 22238 22925 21955 23015 21814 22839 22245 22624 22366 22727 22297 22790 22058 22987 22160 22663 22194 22740 22007 22781 22200 22765 22055 22045 22213 18254 17433 18024 17777 18757 18101 18828 18301 19047 18493 24200 23585 24161 23260 23847 23191 23515 22822 23309 22873 23345 22848 23206 22631 23164 22587 23145 18602 19100 18752 19491 19186 19853 19441 19852 19726 23930 23734 24059 23429 23809 23043 23510 23014 23447 22967 23065 22901 23006 22444 22542 22192 22320 22136 21012 20919 21032 20940 20804 21045 20985 20861 20937 22019 22167 22165 22624 22030 23399 22828 23276 22676 23336 22605 23148 22490 22792 22640 22653 22937 20999 21212 20947 20905 21133 20951 21626 20814 21253 21043 23224 23315 22890 23355 22572 23056 22820 23040 22919 22784 22604 22968 22418 22798 22648 22786 22716 21717 21833 22074 21413 22198 21651 21872 21793 21688 21737 22481 21635 22600 22053 22759 22553 22663 22402 22851 22220 22957 22425 22634 22423 22840 21901 22928 22261 22672 22503 22631 22146 22747 22137 22699 22384 22688 22087 22946 22112 22808 22231 22580 21865 22764 21796 22494 21901 22555 21961 22581 21821 22144 21898 22319 21595 22414 22007 22247 21655 22483 21920 22252 21453 22440 21645 22397 21713 22371 21604 22274 21780 22241 21656 22121 21712 22524 22009 22871 21879 22358 21653 22416 21605 22205 21628 22379 21669 22141 21688 22385 21776 22241 21860 22272 21699 22205 21927 22214 21657 22167 21766 22096 21808 22215 21840 22113 21597 22152 21920 22085 21557 22097 21880 22318 21711 22238 21907 22280 21774 22272 22036 22272 21715 22327 22092 22234 21831 22273 22217 22336 22071 22179 22023 22536 21880 22175 21873 22528 21783 22220 21886 22528 21853 22128 21928 22545 21722 21993 21959 22528 22118 22001 21915 22528 22172 22160 21831 22243 22297 21880 21746 22304 22305 21993 22355 22197 22139 21720 22130 22032 22510 21833 22210 22073 22315 21875 21959 22077 22328 22088 21939 22029 22297 22153 22164 22041 22233 22179 22389 21803 21816 21932 22499 21940 22319 21365 22652 22516 22651 22139 22321 22215 22625 22313 22404 21895 22547 22273 22644 22080 22329 22085 22796 22208 22563 21783 22560 22007 22793 22003 22441 21578 22680 22126 22733 21864 22503 21865 22832 22110 22617 21709 22489 22007 22728 21957 22406 21729 22651 22252 22597 21991 22565 22087 22748 22167 22613 21702 22592 21720 22599 22020 22529 22007 22537 21840 22676 21952 22317 21852 22387 21822 22600 21924 22487 21789 22387 21864 22759 21723 22711 21803 22433 21853 22541 21696 22545 21741 22465 21900 22541 21706 22367 21723 22401 22020 22515 21949 22417 21917 22507 22048 22496 21937 22312 21888 22537 22016 22408 21984 22421 21932 22424 22023 22392 21978 22377 21918 22273 22099 22384 21811 22345 21928 22265 22035 21989 22068 22192 21948 22538 22131 22032 22055 22528 22254 22528 22169 22131 21992 22336 22166 22726 22109 22125 21877 22209 22284 22659 21960 22324 22185 22391 22551 22229 22008 22180 22007 22656 22356 22122 22406 22148 22006 22659 22344 22169 22549 22342 22402 22054 22078 22045 22603 22202 22384 21923 22295 22260 22506 22261 22139 22183 22551 22400 22329 21943 22360 22235 22640 22117 22264 22065 22542 22224 22449 21784 22631 22119 22544 21867 22455 22167 22567 21840 22415 22167 22585 17761 18497 18350 19494 19599 19997 19227 19647 19440 24649 23600 23052 23180 23093 22707 19866 19321 21308 20561 20202 19707 21424 20986 21352 22087 24415 24085 24277 23214 23944 20257 21728 21420 21546 21233 21772 21058 21945 20842 21966 21862 22564 22096 22440 21872 21767 21344 21983 21240 22055 21851 21927 21255 21786 21291 23351 22308 22695 21929 22414 21719 22295 21469 22328 21441 22269 21481 22135 21508 22104 21696 22362 21943 22311 21887 22267 22021 22448 21888 22327 21883 22480 21809 22520 21923 22506 21929 22354 22001 22361 22056 22368 22087 22762 21990 22240 22072 22397 21968 22581 22036 22343 22029 22380 22192 22417 22066 22107 22026 22530 21937 22483 21908 22236 22291 22149 22441 22145 21975 22457 21819 22658 22013 22186 22123 22154 22380 22056 22123 22016 21907 22624 21898 22387 21815 22194 22475 22188 22281 21863 22333 22165 22301 22275 22100 22199 22357 22005 22453 21829 22403 22177 22183 22199 22163 22221 22323 22037 22429 21824 22516 22088 22248 22144 22221 22615 22667 22162 22792 22080 22729 22306 22635 22475 22514 22389 22919 21875 22913 22148 22694 22489 22619 22487 22834 
