# Supplementary material for: An Active Feature Selection Strategy for DWT in Artificial Taste
Source: Hindawi journal article supplement (doi:10.1155/2018/9709505), 2018-01-01
Supplement: f1 [file 9709505.f1.zip › spirit-med-1.txt]

34754 31747 30052 29870 16304 19545 20161 21344 21528 22284 22159 22724 22218 22848 22620 23089 22727 23058 22805 23202 22844 23289 22864 23392 23004 23238 23100 23452 23045 23691 23157 23506 22955 23666 23004 23648 23278 23537 23137 23508 23196 23638 22920 23704 23123 23477 23322 23553 23032 23843 23360 23334 23459 23672 22855 23709 23301 23670 23529 23568 23174 23770 23282 23301 23569 23560 23353 23646 23232 23671 23369 23398 23650 23635 23452 23545 23488 24048 23239 23582 23420 23854 23815 23428 23457 23496 23185 23968 23232 23808 23257 23511 23424 23660 23705 23479 23735 23473 23362 23534 23527 23783 23328 23840 23372 23674 23426 23369 23543 23025 23490 23479 23648 23586 23568 23571 23831 23432 23891 23251 23891 23203 23931 23425 23778 23506 23493 23658 23562 23512 23829 23233 23872 23462 23778 23454 23668 23568 23640 23639 23745 23382 23936 23396 23990 23305 23797 23512 23651 23506 23929 23529 23693 23450 23863 23232 23910 23335 23885 23178 24017 23211 23957 23397 23959 23273 24022 23335 24017 23553 23992 23244 23926 23341 23888 23335 23767 23405 23858 23484 23688 23451 23712 23383 18585 19857 20777 20803 21368 21251 21780 21518 21891 21642 26740 25251 25184 24301 24593 23843 24348 23537 24242 23552 24151 23429 24105 23480 24039 23489 23891 23544 24040 23473 24142 23466 23740 23510 23640 23496 23776 23403 23847 23409 23989 23302 24048 23033 24116 23176 24000 23157 23909 23144 23872 23312 23933 23237 23872 23320 23852 23278 23641 23324 23818 23258 23880 23154 23891 23356 23960 23062 23953 23121 23767 23273 23626 23160 23865 23133 23987 23117 23921 23108 23887 23172 23915 23302 23797 23141 23767 23162 23912 23272 23825 23224 23726 23386 23719 23281 23769 23257 23988 23306 23752 23318 23654 23385 23674 23171 23842 23290 23808 23195 23617 23304 24138 23247 23825 23216 23896 23140 23647 23426 23559 23267 23907 23172 23590 23596 23504 23506 23886 23207 23654 23735 23591 23360 24033 23228 23568 23747 23394 23191 23728 23556 23808 23186 23945 23340 23508 23521 23760 23418 23488 23746 23463 23264 23544 23735 23413 23242 23518 23851 23493 23251 23483 23732 23262 23357 23402 23783 23504 23382 23464 23619 23351 23401 23317 23700 23581 23700 23079 23852 23389 23872 23304 23512 23366 23931 23588 23671 23278 23608 23671 23752 20299 21084 21354 22108 22097 22507 22140 22528 22068 26995 25250 25203 24204 24248 23519 24117 23698 24077 23649 23962 23434 23726 23151 23917 23389 24092 23476 24016 23231 23773 23019 23855 23255 24110 23428 23993 23510 23879 23357 23769 23005 23153 23242 23936 23265 24124 23322 24167 23385 23974 23233 23972 23139 23792 22935 23717 22971 23825 23206 23840 23251 23873 23379 23975 23297 23956 23346 24064 23476 24012 23460 23993 23472 24128 23299 24135 23191 24024 23188 23969 23276 24002 23221 23992 23325 23912 23318 23980 23271 23872 23321 23909 23252 23881 23153 23787 23072 23802 23112 23772 23040 23857 22979 23776 23172 23856 23068 23885 23136 23695 23136 23903 23248 23945 23290 23769 23392 23840 23116 23685 23221 23688 23057 23668 23171 23655 23108 23696 23305 23911 23303 23741 23246 23774 23181 23617 23148 23640 23224 23808 23389 23837 23353 23667 23152 23616 23169 23489 23220 23814 23567 23628 23204 23634 23195 23578 23159 23748 23598 23689 23340 23503 23313 23278 23367 23880 23412 23461 23248 23620 22977 23573 23723 23584 23223 23323 23232 23517 23830 23736 23312 23472 23445 23357 23588 23722 23329 23392 23528 23501 23747 20617 21278 21857 21968 22349 22728 22601 22804 22437 22972 25125 24884 23872 23939 23605 24087 23716 23766 23434 23859 23678 23781 23388 23616 23569 23923 23420 23591 23408 23922 23343 23530 23348 23837 23488 23708 23056 23890 23494 23654 23064 24005 23427 23680 23040 23874 23392 23717 23049 23911 23370 23770 23064 23901 23408 23780 23063 23968 23400 23736 23110 23960 23291 23591 23190 23969 23145 23727 23312 23924 23197 23913 23255 23825 22975 24039 23212 23772 23174 23997 23141 23609 23299 23956 22888 23825 23277 23883 23020 23902 23324 23732 23131 24042 23117 23607 23210 24162 23040 23880 22998 23845 23112 23902 23042 23781 23141 23815 23207 23760 22979 23766 23264 23720 23088 23878 23274 23783 23041 23724 22789 23802 23162 23797 23127 23744 22892 23799 23025 23795 23201 23737 23200 23680 23213 23680 23078 23638 23040 23796 23125 23729 23207 23754 23214 23841 23321 23826 23309 23653 23188 23773 23240 23680 23328 23637 23144 23729 23264 23714 23195 23540 23235 23712 23273 23640 23328 23729 23374 23875 23364 23597 23109 23384 22984 23292 23136 23602 23240 23415 23112 23407 23116 23424 23224 23509 23235 23485 23214 23488 23256 23506 21788 22441 22516 22962 22983 23213 23192 23497 23223 25376 24557 24299 23881 23966 23592 23485 23200 23457 23281 23336 23276 23525 23886 23362 23539 23530 23798 23516 23851 23452 23800 23369 23857 23311 23821 23332 23597 23283 23429 23207 23891 23276 23543 23501 23584 23480 23782 23493 23691 23547 23749 23450 23800 23449 23780 23476 23815 23360 23864 23340 23966 23328 23808 23461 23800 23397 23801 23388 23874 23289 23904 23337 23837 23253 23840 23202 23670 23146 24111 22863 23633 22998 23552 23166 23797 23195 23899 23305 23929 23229 23882 23062 23606 22898 23719 23032 23878 23256 23963 23224 23830 23094 23541 22967 23785 23239 23906 23335 23683 23010 23642 23175 23932 23227 23749 23200 23568 23126 23989 22948 23844 23026 23640 23214 23768 22934 23657 23045 23812 23127 23593 23148 24096 23098 23732 23056 23641 23098 23731 23040 23786 22986 23744 23096 23888 22961 23639 23027 23790 23023 23621 23016 23746 23169 23747 23094 23724 23233 23684 23000 23583 23207 23686 23025 23600 23210 23546 23116 23533 23303 23501 23090 23725 23174 23552 23035 23719 23242 23567 23269 23511 23140 23653 23268 23584 22948 23749 23118 24019 23330 23660 22246 23057 22832 23105 22874 23365 22913 23155 23212 23281 23645 24042 23450 23472 23603 23489 23169 23914 23218 23453 23748 23488 23072 23784 23183 23357 23515 23309 23317 23499 23099 23700 23235 23159 23669 23398 23303 23764 23228 23373 23665 23412 23137 23592 23450 23218 23689 23178 23664 23296 23465 23380 23536 23219 23722 23264 23668 23233 23514 23452 23396 23402 23553 23248 23735 23097 23696 23245 23657 23392 23289 23402 23577 23286 23608 23056 23865 22967 23802 23100 23716 23136 23501 23456 23663 23382 23661 23270 23753 23106 23713 22936 23817 22932 23852 23092 23826 23145 23726 23348 23580 23328 23580 23268 23714 23290 23618 23204 23808 23108 23768 23034 23941 22920 23911 22848 24016 23061 23950 22950 23945 23044 23936 23026 23826 23076 23884 23078 23725 23045 23688 23187 23662 23149 23744 23091 23853 23029 23788 23025 23882 23026 23872 22934 23915 22886 23847 22570 23821 22876 23690 23086 23725 23014 23763 22955 23610 23147 23763 23251 23597 23209 23585 23082 23705 23099 23668 22920 23593 23013 23815 22931 23769 22967 23811 22948 23725 22891 23597 23015 23588 23063 23553 23207 23458 23114 23516 23113 23626 23092 23697 23105 23713 22925 23581 23057 23522 23157 23588 23218 23560 23213 23474 23089 23553 23063 23712 23152 23667 23040 23615 23187 23529 23303 23515 23167 23565 23034 23808 22936 23700 22957 23456 23461 23515 23320 23408 23138 23630 23245 23478 23060 23432 23575 23488 23092 23348 23150 23780 23132 23372 23388 23328 23537 23152 23202 23751 23246 23526 23069 23393 23630 23379 23216 23632 23048 23438 23287 23249 23527 23381 23211 23531 23187 23451 23342 23416 23346 23111 23756 23276 23441 23362 23569 23061 23768 22963 23760 23226 23237 23424 23492 23161 23680 23048 23577 23387 23541 23369 23500 23297 23735 22950 23748 23205 23559 23376 23408 23228 23692 23163 23703 23194 23729 22937 23816 23228 23686 23207 23617 23258 23535 23252 23721 23109 23804 22948 23834 23165 23808 23164 23568 23250 23640 23112 23784 23008 23760 23218 23739 23064 23872 22994 23515 23133 23900 23030 23724 23028 23948 23178 23825 22819 23685 23104 23853 23176 23690 23061 23479 22964 23859 23159 23778 23012 23512 23121 23865 22886 23611 22893 23735 22980 23761 22990 23574 22845 23844 23010 23521 23125 23646 23136 23516 23011 23517 23017 23765 22897 23688 22875 23781 23002 23590 22929 23748 22935 23412 23078 23716 23008 23494 23143 23574 23174 23680 23079 23467 23000 23609 23053 23553 23255 23524 22920 23609 23041 23057 23110 23484 18773 20648 20648 21442 21149 21721 21608 22106 21586 28391 25892 25284 24171 24512 23787 23720 23817 23758 23255 23707 23273 23767 23321 23267 23581 23418 23341 20269 20864 22113 21667 22208 22067 22204 22537 22301 26596 25256 24440 24630 23700 23892 23600 23520 23785 23469 23721 23429 23214 23558 23485 23776 23401 19400 21469 21527 22503 22238 22807 22328 23017 22688 22903 25507 24432 24075 24044 23837 23784 23563 23680 23356 23833 23279 23768 23191 23832 23072 23784 23138 21723 21770 22818 22372 23184 22616 23228 22583 23197 22796 24876 23880 24150 23435 23821 23329 23730 23317 23694 23281 23698 23271 23569 23282 23656 23241 23584 22348 22976 22774 23278 22857 23514 22856 23522 22775 23504 23520 24048 23213 23910 23143 23820 23059 23856 23178 23914 22889 23873 22926 23930 22912 23950 23047 23661 23089 23671 23111 23126 23104 23616 23008 23643 22960 23705 23024 23911 22912 23787 22775 23654 22964 23604 23046 23674 22988 23725 22938 23488 23032 23718 22871 23695 22990 23636 22983 23603 23109 23544 23181 23573 23248 23357 22994 23413 23092 23578 22982 23692 23217 23524 23072 23526 23218 23624 23233 23469 23172 23640 22976 23634 23236 23513 23127 23456 23509 23452 23195 23388 23191 23654 23107 23415 22939 23270 23456 23286 23314 23344 23136 23833 23266 23304 23419 23101 23301 23264 23018 23770 23189 23282 23514 23210 23403 23209 23136 23582 23085 23405 23520 23097 23593 23173 23936 23264 23441 23012 23630 23116 23405 23377 23268 23320 23639 23033 23577 23462 23317 23232 23612 22871 23694 23301 23456 23084 23705 23066 23596 23194 23616 23169 23732 23018 23637 23168 23684 23029 23698 23042 23694 23168 23701 22952 23821 23117 23481 23040 23873 22903 23683 23136 23841 22720 23912 23024 23655 23040 23829 22844 23652 23160 23669 22938 23784 23168 23640 22954 23899 23090 23624 22933 23748 22901 23666 22923 23737 22894 23552 23040 23687 22800 23456 23027 23634 22869 23746 23005 23577 22853 23557 22918 23544 22842 23488 22999 23669 22938 23640 23168 23557 23040 23559 23098 23330 22977 23577 23142 23426 22950 23500 23160 23452 23024 23540 23133 23305 22934 23447 23348 23528 22983 23420 23353 23425 22457 23369 23274 23636 22982 23403 23256 23592 22958 23399 23113 23746 23331 23098 23127 23441 23473 23119 23067 23312 23545 23521 23371 23233 23266 23685 22928 23303 23044 23511 23463 22994 23516 23226 23574 22993 23356 23218 23672 23145 23467 23304 23568 23257 23232 23123 23671 23227 23412 23406 23582 23258 23411 22869 23522 23196 23654 22963 23701 23200 23722 23189 23383 23026 23742 23164 23527 22902 23735 23181 23699 22920 23607 23226 23600 23041 23773 23112 23584 22863 23858 22903 24182 23090 23747 22787 23712 23138 23340 23048 23826 22874 23798 23076 23878 23078 23543 22949 23776 22848 23696 22811 23606 22931 23670 23136 23575 23098 23467 23152 23556 23124 23589 22896 23628 22812 23777 22801 23767 22914 23628 23000 23498 22877 23325 23128 23536 22997 23646 23052 23564 23060 23659 23120 23428 23399 23561 23172 23522 23012 23522 23035 23637 22986 23398 22828 23481 23158 23313 23058 23433 17600 19907 20401 21106 21303 21460 21421 21827 21501 21703 26368 25786 24375 24128 24209 23863 20283 21864 21589 21968 22440 22264 22248 22444 22384 27159 24963 24560 24176 24309 23808 21073 21867 22184 22629 22320 22957 22458 23037 22452 23129 24562 24556 23815 24051 23670 21596 22272 22599 22781 22913 22882 22912 22877 23016 22812 24576 24003 24059 23684 23553 23448 23083 22867 23320 22902 23338 22935 23391 23010 23445 23952 24048 23521 23209 23359 23790 23237 23504 23232 23601 23172 23677 23122 23654 23115 23728 22995 23832 23099 23876 22787 23857 23028 23790 23006 23691 22872 23633 22958 23644 22970 23751 22855 23632 22956 23585 23200 23473 22908 23675 22853 23634 22848 23720 22822 23566 22967 23408 23050 23491 23009 23638 22995 23565 23116 23476 23145 23402 23030 23713 22629 23436 23081 23462 22993 23608 23029 23435 23069 23400 23098 23596 23105 23544 23341 23287 23056 23635 23080 23436 23405 23190 22944 23473 23287 23400 23067 23662 23160 23205 23042 23593 23090 23313 23460 23332 23111 23215 23561 23200 23016 23432 23565 23376 23766 23280 23394 23189 23641 23246 23472 22949 23498 23387 
22332 21516 22192 21420 22080 21600 22022 21568 22151 21642 22105 21744 22114 21702 22290 21538 22171 21517 21922 21784 21943 21493 22281 21476 21975 21896 21984 21632 22360 21458 21883 21957 21745 21513 22436 21600 21751 21936 22520 21686 22093 21843 22341 21543 22508 22045 22026 22070 22597 21547 22673 22115 22295 21976 22775 21763 22653 21941 22397 22017 22764 21691 22890 21825 22566 22067 22660 21800 22801 21685 22728 22075 22347 22195 22512 22070 22735 21881 22725 21974 22616 22193 22324 22272 22746 22123 22616 21928 22816 21736 22891 21904 22853 21824 22611 21824 22674 21883 22498 22087 22641 21988 22530 21842 22739 22097 22740 21981 22688 21937 22523 22061 22455 22177 22453 22112 22652 21780 22732 21200 22778 21843 22718 21871 22496 22011 22529 21997 22543 21782 22807 21847 22673 22000 22374 21996 22536 22030 22617 22007 22563 22032 22600 22055 22602 21960 22552 22103 22517 22147 22484 22054 22566 22008 22535 22198 22627 21982 22601 21997 22592 22029 22511 21965 22468 22010 22647 21996 22600 21960 22600 22041 22432 22085 22370 22001 22545 22232 22330 22243 22393 22240 22589 22261 14107 14950 15384 15540 15760 15920 16299 16206 16388 16260 24766 24039 23913 23192 23450 23105 23271 22604 23047 22433 22983 22427 22836 22434 22694 22729 22711 22505 22504 22615 22607 22638 22512 22686 22339 22900 22323 22880 22510 22674 22583 22560 22300 22296 22413 22243 22421 22184 22863 22071 22926 22311 22738 22081 22497 22242 22541 22233 22499 22452 22341 22915 21986 22885 22032 22670 22196 22610 22407 22404 22461 22464 22440 22432 22229 22672 22044 22724 22256 22588 22264 22400 22512 22180 22472 22503 22235 22624 21952 22720 22226 22510 22360 22254 22384 22558 22081 22804 21999 22518 22388 22557 22278 22492 22158 22663 21863 22760 22041 22594 22275 22364 22167 22762 21953 22805 22024 22588 22184 22461 22033 22843 21892 22677 22275 22365 22105 22813 21783 22702 22201 22560 21931 22960 21716 22659 22114 22647 21892 22839 22077 22466 22125 22729 21893 22545 22183 22609 21845 22535 22197 22393 21835 22875 22038 22406 21964 22791 22102 22445 21650 22672 21900 22541 21919 22564 22028 22636 21957 22435 22032 22587 21865 22471 21873 22696 22080 22311 21884 22409 21971 22630 21810 22461 21785 22658 21997 22444 21784 22546 21933 15627 15835 17153 16924 17913 17541 18225 17738 18355 17709 24974 24023 24153 23207 23277 22720 22945 22528 23065 22516 22905 22212 22721 22200 22693 22192 22811 22276 22674 22093 22552 22117 22631 22074 22618 22317 22809 22103 22430 21988 22616 22032 22439 22137 22476 22396 22805 22433 22593 22265 22412 21975 22071 21806 22369 22197 22368 21999 22321 22062 22325 22049 22360 22113 22452 22315 22683 22498 22905 22549 22706 22450 22699 22359 22580 22336 22442 22302 22514 22209 22343 22065 22301 22296 22377 22403 22439 22211 22362 22043 22000 22278 22145 22443 22021 22595 22157 22731 22257 22612 22307 22554 22390 22390 22379 22413 22240 22386 22099 22408 21936 22469 21924 22134 21967 22191 21896 22396 22137 22539 22260 22725 22189 22597 22065 22459 21958 22434 21835 22318 21770 22390 22129 22635 22145 22600 22188 22610 21879 22221 21672 22423 21972 22549 22174 22677 22134 22453 21782 22295 21590 22516 22056 22658 22121 22634 21841 22580 21549 22481 21977 22792 22059 22597 21741 22278 21761 22612 22137 22702 21988 22416 21564 22423 22096 22662 21964 22534 21661 22337 22023 22770 21625 22588 21879 22544 21915 22637 21675 22345 21850 22471 17099 18338 18208 19144 18649 19494 18912 19370 18964 19781 23621 23733 22683 23152 22326 23115 22256 22646 21853 22898 22148 22692 21920 22425 22066 22536 21997 22275 22019 22519 21928 22342 21943 22432 21991 22320 22071 22490 21971 22376 21816 22333 21983 22358 21901 22345 22144 22347 21888 22482 22122 22316 21777 22407 22027 22319 21793 22449 22033 22177 21680 22468 21989 22200 21836 22396 21957 22164 22107 22297 21881 22000 22367 22281 21880 22425 22080 22231 21772 22605 21958 21989 22324 22309 21794 22124 22454 22118 21889 22417 22179 22128 21760 22670 21885 22229 22352 22177 21819 22183 22395 22139 21824 22565 22125 21997 21962 22728 22136 22220 22519 21900 22535 22205 22333 21607 22227 22045 22537 22011 22234 21730 22148 22112 22528 22288 22359 21965 22093 21808 22135 22046 22353 22113 22581 22240 22515 22163 22423 21882 22309 21636 22151 21813 22205 21790 22268 21993 22419 21921 22648 22075 22579 22108 22666 22000 22521 22091 22584 22052 22576 22078 22395 22050 22577 21956 22360 21829 22273 21827 22201 21680 22109 22007 22274 21702 22415 21765 22553 21943 22551 21972 22673 21936 22658 22033 22573 21993 22679 22071 22551 18464 19723 19690 20513 19763 20486 20054 20588 19971 20647 22992 23356 22257 22645 22000 22501 21813 22617 21591 22537 21726 22311 21790 22360 21800 22434 21837 22389 22016 22408 21863 22583 21730 22564 21775 22392 21603 22318 21721 22336 21549 22405 21504 22400 21625 22492 21701 22403 21808 22397 21957 22564 21852 22528 21836 22417 21867 22372 21866 22344 21980 22340 21865 22352 21879 22417 21904 22304 22000 22487 21885 22416 21852 22373 21801 22292 21815 22144 21691 22182 21741 22270 21954 22256 21631 22083 21952 22320 22224 22333 21970 22207 21789 22084 21851 21984 21632 22039 22030 22472 21948 22135 21901 22053 21668 22066 22375 22471 21898 21944 21690 21991 21892 22371 22167 22019 21667 22147 21841 22394 22337 22042 21648 21948 21754 22423 22253 21913 21723 21797 21923 22345 22302 21941 22106 21696 22486 22036 22297 21702 22096 22234 22357 21992 21888 21902 22345 22048 22128 21846 22200 22121 22203 21629 22135 22194 22274 21781 22247 21984 22412 21715 22237 21874 22461 21558 22215 22144 22244 21649 22297 22184 22311 21568 22441 21895 22183 21616 22462 21729 22151 21984 22472 21709 22388 21971 22017 21667 22544 21797 22277 21907 20838 20258 21401 20851 21223 21011 21633 20643 21713 22767 22820 22160 22885 21832 22542 21941 22337 21809 22629 21756 22411 22121 22226 21817 22480 21546 22471 21886 22177 21899 22574 21511 22593 21421 22397 21585 22263 21647 22311 21582 22373 21598 22307 21824 22261 21577 22403 21725 22266 21650 22224 21675 22053 21520 22335 21534 22456 21508 22207 21737 22792 21683 22258 21604 22267 21862 22445 21625 22073 21656 22161 21846 22069 21764 22341 21604 22295 21741 22277 21660 22201 21761 22072 21907 22119 21801 22126 21793 22214 21683 22304 21555 22354 21676 22243 21705 22323 21622 22311 21756 22178 21896 22139 22039 22105 22070 22080 21912 22150 21699 22107 21512 22123 21788 22253 21847 22392 21806 22423 21766 22219 21632 22401 21709 22317 21817 22223 21634 22043 21728 22154 21803 22099 21739 22128 21794 22195 21733 22203 21708 22287 21731 22504 21760 22550 21693 22343 21677 22392 21716 22373 21862 22327 21762 22170 21936 22227 21890 22021 22090 22058 22071 21792 22282 21760 22385 21584 22469 21658 22311 21591 22283 21859 22040 22052 22032 22066 22229 22067 21908 22080 21914 21877 22279 21770 22384 21484 22365 21504 22360 21649 22434 21709 22178 22009 21868 22037 21927 22044 22166 21598 22466 21664 22525 21418 22392 21719 22323 21924 22213 21921 22057 21833 22302 21960 22523 21440 22421 21723 22295 21774 22197 21819 22208 21577 22540 21504 22500 21640 22228 21772 22147 21725 22442 21600 22477 21355 22370 21756 21959 21880 22158 21801 22376 21575 22355 21592 22279 21766 22034 21778 22457 21456 22611 21563 22328 21602 22244 21448 22393 21403 22273 21624 22044 21694 22157 21537 22231 21704 22163 21763 22122 21536 22252 21465 22503 21433 22200 21693 22144 21457 22421 21311 22381 21497 22112 21774 22129 21728 22107 21513 22209 21572 22101 21600 22175 21748 21994 21721 22204 21490 22272 21598 22194 21600 22199 21687 22066 21707 22098 21778 21989 21605 22072 21713 22130 21504 22252 21511 22097 21627 21896 21896 21903 21540 22222 21693 22115 21991 21991 21739 22400 21785 21876 21734 22423 21837 21927 21575 22231 21979 21922 21548 21814 21715 22347 22124 21962 21655 21760 21618 22172 22217 21848 21557 22098 21684 22240 22148 21910 21633 21872 21763 22462 21817 21775 22214 21879 21806 22213 22176 21625 21937 21925 22265 21687 21851 21923 22300 21908 21902 21670 22272 21844 21919 21920 22314 21737 21810 22016 22353 21819 22048 21926 22216 21443 22316 21901 22114 21728 22312 21769 22063 21933 22141 21558 22444 21645 22060 21898 14920 14944 16474 16025 16425 16525 16979 16311 17315 25184 24712 23939 23749 22887 23527 22379 23248 22425 22717 22244 22855 21878 22842 21830 22724 21988 15150 16334 17396 17329 18329 17347 18625 17837 18446 18146 25048 23938 24000 22843 23641 22288 23146 22585 22972 22041 22839 21911 22651 22018 22517 21961 22439 16722 18275 18257 19158 18641 19437 18860 19584 18949 19730 23878 24128 22840 23058 22459 22893 22254 22697 21907 22461 21824 22554 21825 22523 21511 22561 21855 19280 19094 20167 19675 20389 19877 20635 20045 20720 20230 23694 22577 22764 22182 22500 22064 22406 22087 22231 22077 22244 21956 22135 21954 22163 22102 21899 20445 20695 20813 20908 20952 21093 21058 21017 21001 22830 22381 22541 21965 22622 21821 22560 21664 22471 21633 22609 21798 22417 21825 22070 21619 21992 21838 22003 22007 21852 22271 21899 22300 22123 22144 21533 22346 21597 22423 21788 22197 21892 22285 22016 21868 22091 21892 21936 21981 21863 22326 21938 22301 21799 22211 21800 22144 21904 22193 21985 21985 21856 22285 21861 22373 21765 22429 21539 22398 21817 22321 21765 22317 21856 21975 21992 22280 21618 22547 21491 22444 21557 22442 21705 22217 21805 22060 21888 22339 21591 22522 21337 22577 21662 22385 21831 21946 21864 22171 21749 22433 21472 22471 21747 22154 21907 22087 21671 22512 21278 22569 21580 22482 21616 22240 21544 22384 21448 22213 21846 22299 21639 22256 21200 22311 21651 22220 21580 22203 21468 22407 21472 22108 21737 22227 21512 22276 21473 22129 21768 22034 21605 22286 21461 21996 21750 22009 21613 22236 21557 22100 21829 22042 21598 22327 21562 22109 21737 22315 21641 22069 21681 22048 21753 22240 21888 22057 22055 21816 21662 22275 21614 21841 21810 22098 21901 21927 21953 21987 21519 22409 21521 21735 21735 22465 21853 21946 22184 21739 21466 22186 22189 21804 21624 22378 21658 21755 21831 22231 21581 21955 22073 21617 21483 21912 22480 21493 22197 21868 22118 21632 22197 21963 22059 21492 22180 21934 22112 21748 22264 22016 22073 21611 22284 21946 22052 21433 22201 22000 22132 21637 22326 21890 22093 21408 22350 21882 22157 21431 22162 21781 22212 21400 22224 21762 22373 21506 22171 21745 22443 21678 22042 21641 22482 21595 22076 21528 22480 21847 22040 21577 22318 21846 22107 21404 22245 21733 22486 21447 22362 21415 22209 21574 22112 21555 22096 21661 22236 21616 22144 21696 22323 21418 22007 21442 22478 21648 22161 21403 22114 21520 21964 21473 22146 21695 22173 21576 22009 21679 22075 21674 22048 21724 22184 21511 22102 21671 22064 21729 21986 21621 21943 21779 22071 21056 22053 21812 22029 21386 21870 21797 22025 21507 21964 22078 21785 21656 22163 21745 21868 21715 22144 21756 21817 22129 21767 21536 22437 21553 21922 21983 21611 22151 21832 21687 22077 21542 22338 21557 22016 21536 21850 21787 21960 21785 21790 22041 21829 21960 21845 21996 21894 21847 21909 22131 21575 22087 21875 21677 21862 22117 21467 21939 21952 22149 21530 22285 21888 22109 21478 22060 21853 22021 21441 21972 21865 22307 21609 21871 21639 22327 21653 21803 21364 22356 21735 22221 21273 14068 14886 16188 15620 16883 16436 17093 16224 17560 16789 25130 23975 24252 23040 23235 22683 17044 17180 18417 17877 18727 18038 18580 18183 18776 24741 24561 23324 23816 22773 23244 17649 18775 18721 19386 18972 19691 18874 19797 18925 25184 23367 23861 22571 23132 22342 19334 19232 20036 19793 20421 20281 20580 20293 20773 20248 23624 22884 22999 22464 22491 20404 21078 20937 21184 20966 21323 21047 21248 21184 21287 22743 22658 22614 22272 22369 22334 22145 22237 21920 21911 21786 21803 21776 21943 21643 22205 21740 22432 21687 22518 21752 22039 21832 21920 22304 21792 22247 21777 22137 21797 21881 22168 22286 22028 22160 21905 22030 21807 22141 21753 22243 21632 22268 21968 22401 22144 21927 21928 22217 21672 22413 21784 22153 21869 21992 21854 22349 21579 22467 21671 22159 21953 22041 21573 22447 21514 22253 21822 21967 21669 22282 21575 22184 21829 22217 21465 22448 21757 22147 21700 22487 21235 22304 21745 22119 20960 22413 21830 21904 21739 22338 21490 22197 21689 22324 21555 22362 21405 22381 21481 22070 21542 22328 21700 22007 21676 22224 21136 22113 21639 22369 21621 22150 21583 
21510 21545 21581 21464 21615 21667 21511 21616 21452 21520 21501 21696 21413 21802 21459 21651 21541 21585 21568 21754 21219 21824 21529 21607 21557 21860 21325 21785 21443 21555 21495 21835 21152 21810 21392 21563 21373 21820 21280 21750 21452 21829 21330 21805 21360 21797 21462 21802 21126 21767 21419 21709 21159 21707 21349 21824 21312 21776 21222 21774 21383 21749 21291 21795 21356 21671 21121 21671 21280 21310 21254 21853 21320 21749 21362 20978 21612 21008 21592 21124 21316 21358 21249 21508 21401 21032 21429 21063 21707 21163 21605 21211 21248 21301 21392 21451 21443 21234 21416 21182 21548 21236 21712 21079 21751 21251 21448 21282 21121 21355 21924 21395 21367 21459 21413 21309 21351 21459 21367 21677 21186 21618 20688 21611 21352 21479 21498 21586 21521 21505 21383 21605 21310 21555 21412 21575 21508 21319 21546 21402 21475 21584 21132 21649 20891 21587 21420 21510 21504 21489 21440 21479 21489 21522 21349 21712 21400 21646 21305 21710 21095 21731 21188 21655 21237 21676 21267 21642 21463 21655 20590 21703 21292 21715 21265 21738 21361 21681 21331 21654 21488 21568 21452 21591 16559 16965 16981 17138 17167 17383 17273 17430 17376 23283 22332 22354 21736 21857 21499 21753 21397 21644 21350 21614 21332 21592 21317 21607 21320 20950 21295 21557 21396 21607 21335 21523 21342 21452 21363 21617 21321 21699 21287 21760 21310 21729 21076 21832 21084 21773 21336 21666 21248 21642 21269 21645 21277 21655 21208 21678 21285 21602 21284 21577 21301 21744 21189 21656 21639 21583 21074 21730 21233 21656 21236 21697 21199 21649 21173 21792 21195 21761 21109 21738 21083 21747 21271 21642 21259 21602 21148 21748 21216 21667 21108 21705 21344 21541 21257 21563 21255 21764 21680 21618 21365 21606 21345 21601 21262 21799 21196 21720 21211 21628 21365 21687 21281 21656 21197 21711 21095 21660 21289 21712 21348 21752 21033 21682 21498 22028 21286 21771 21356 21709 21460 21383 21351 21864 21333 21504 21500 21528 21317 21760 21205 21484 21368 21908 21397 21553 21609 21468 21207 21573 21565 21597 21285 21721 21557 21696 21312 21783 21401 21687 21296 21695 21408 21590 21416 21706 21578 21436 21319 21488 21584 21421 21470 21627 21537 21570 21424 21353 21729 21531 21520 21413 21468 21648 21649 21495 21381 21469 21702 21668 21509 17208 18274 18427 18609 18647 18748 18554 19037 18692 19037 22817 22471 21787 21836 21527 21856 21559 21674 21468 21530 21255 21521 21454 21686 21399 21760 21338 21511 21103 21588 21289 21785 21448 21730 21383 21689 21414 21400 21405 21605 21316 21771 21411 21701 21350 21845 21371 21729 21286 21484 21082 21453 21257 21670 21250 21766 21353 21817 21427 21813 21398 21724 21389 21824 21377 21773 21385 21801 21386 21746 21296 21639 21213 21616 21166 21555 21163 21625 21172 21734 21211 21591 21140 21642 21219 21632 21174 21624 21160 21601 21263 21688 21273 21788 21333 21713 21356 21831 21287 21755 21341 21804 21195 21756 21221 21736 21209 21742 21273 21662 21214 21638 21047 21721 21354 21484 21208 21664 21349 21796 21331 21739 21256 21741 21344 21660 21174 21648 21286 21494 21120 21640 21392 21831 21321 21673 21243 21692 21280 21702 21216 21556 21216 21738 21357 21784 21346 21593 21278 21650 21334 21477 21477 21860 21376 21573 21308 21605 21537 21393 21465 21756 21447 21635 21228 21493 21203 21896 21629 21635 21379 21615 21382 21427 21557 21781 21264 21538 21281 21484 21481 21856 21338 21602 21248 21575 21466 21783 21390 21505 21344 21474 18979 19478 19538 19536 19604 19738 19840 19831 19794 22824 22429 22016 22011 21549 21609 21616 21632 21609 21492 21360 21520 21550 21629 21638 21557 21544 21603 21329 21408 21449 21674 21424 21582 21443 21588 21476 21645 21345 21600 21589 21557 21274 21623 21564 21594 21138 21650 21507 21590 21152 21719 21483 21600 21257 21721 21389 22104 21314 21696 21441 21056 21352 21705 21355 21536 21392 21861 21216 21718 21468 21783 21216 21771 21411 21665 21191 21833 21367 21641 21330 21829 21224 21648 21399 21687 21122 21740 21292 21665 21315 21829 21385 21611 21303 21926 21248 21762 21230 21719 21130 21828 21263 21681 21366 21920 21223 21879 21441 21744 21237 21710 21286 21737 21295 21732 21287 21639 21312 21794 21248 21733 21221 21639 21369 21746 21180 21844 21201 21657 21124 21671 21319 21743 21386 21867 21309 21719 21191 21789 21299 21651 21136 21720 21509 21627 21233 21644 21312 21686 21361 21733 21323 21769 21387 21724 21305 21767 21360 21743 21300 21845 21421 21773 21355 21764 21308 21579 21128 21609 21330 21595 21228 21600 21280 21651 21374 21765 21351 21579 21366 21655 21399 21720 21403 21681 21449 21815 21628 21843 21635 21820 19524 20365 20343 20676 20274 20533 20300 20504 20262 20518 22215 21961 21965 21724 21351 21504 21322 21538 21273 21504 21419 21605 21284 21559 21395 21705 21376 21477 21573 21559 21619 21505 21603 21335 21487 21362 21553 21488 21457 21570 21592 21607 21740 21619 21552 21653 21591 21577 21559 21596 21560 21504 21601 21445 21485 21403 21446 21329 21457 21252 21564 21250 21559 21430 21614 21522 21568 21479 21652 21484 21708 21477 21655 21545 21769 21491 21704 21556 21697 21520 21720 21392 21656 21371 21600 21351 21639 21325 21763 21416 21831 21352 21812 21425 21814 21296 21705 21128 21702 21342 21783 21450 21824 21403 21708 21105 21721 21346 21800 21419 21824 21352 21519 21303 21843 21445 21920 21305 21653 21362 21849 21238 21831 21313 21525 21365 21868 21298 21710 21654 21735 21442 21676 21287 21717 21216 21863 21279 21747 21153 21682 21308 21808 21297 21736 21148 21832 21257 21650 21121 21850 21280 21666 20864 21865 21365 21735 21225 21610 21409 21668 21201 21703 21304 21768 21239 21620 21344 21669 21320 21667 21313 21779 21387 21803 21272 21608 21238 21686 21272 21653 21394 21664 21272 21783 21283 21605 21204 21815 21229 21527 21412 20843 20672 21313 20865 21070 21060 21286 20864 21422 21975 21930 21610 21794 21271 21728 21383 21494 21363 21606 21210 21817 21315 21553 21536 21643 21371 21861 21339 21735 21588 21577 21155 21850 21322 21523 21529 21580 21255 21690 21242 21748 21424 21568 21570 21601 21601 21597 21557 21504 21700 21515 21607 21629 21368 21569 21456 21565 21684 21371 21606 21409 21591 21561 21356 21605 21530 21509 21716 21304 21665 21540 21613 21495 21553 21539 21601 21508 21551 21482 21738 21399 21819 21251 21673 21400 21656 21463 21561 21473 21455 21551 21625 21504 21629 21495 21800 21355 21761 21264 21794 20865 21704 21376 21744 21416 21754 21511 21719 21450 21609 21447 21633 21436 21671 21481 21680 21381 21685 21434 21842 21351 21811 21295 21833 21352 21769 21317 21849 21309 21914 21268 21888 21372 21877 21238 21787 21371 21935 21351 21961 21302 21856 21473 21871 21395 21720 21355 21738 21265 21760 21370 21708 21352 21746 21285 21838 21356 21708 21373 21675 21303 21673 21280 21921 21132 21840 21216 21742 21457 21791 21058 21751 21226 21746 21331 21676 21344 21672 21324 21546 21321 21779 21359 21760 21322 21740 21304 21713 21194 21702 21318 21752 21385 21613 21367 21751 21295 21697 21269 21824 21312 21840 21749 21666 21168 21686 21290 21614 21401 21792 21271 21696 21312 21722 21287 21761 21291 21741 21499 21625 21464 21550 21365 21684 21237 21797 21330 21760 21463 21539 21586 21553 21447 21800 21238 21846 21323 21549 21589 21556 21379 21533 21385 21861 21369 21596 21424 21463 21623 21559 21351 21820 21248 21726 21504 21496 21516 21565 21383 21860 21288 21564 21440 21492 21649 21442 21696 21626 21478 21521 21622 21519 21724 21344 21735 21527 21392 21573 21702 21447 21648 21474 21623 21520 21524 21639 21645 21491 21678 21380 21704 21632 21562 21616 21521 21542 21718 21426 21792 21305 21720 21565 21541 21560 21728 21581 21490 21524 21685 21468 21710 21496 21728 21474 21660 21482 22066 21481 21751 21458 21795 21339 21741 21476 21555 21434 21768 21200 21833 21373 21623 21412 21799 21297 21616 21379 21880 21329 21824 21367 21813 21433 21814 21351 21588 21325 21786 21495 21848 21278 21840 21258 21803 21462 21905 21361 21796 21317 21872 21291 21792 21226 21831 21362 21824 21295 21746 21191 21812 21349 21684 21317 21681 21415 21648 21251 21805 21351 21731 21191 21814 21243 21789 21258 22048 21328 21775 21316 21689 21408 21690 21256 21783 21305 21672 21232 21678 21347 21776 21424 21733 21287 21738 21338 21649 21259 21837 21360 21713 21419 17475 17268 18067 17711 18077 17937 18309 17845 18400 23024 22663 21991 21997 21562 21773 21405 21844 21337 22077 21428 21655 21200 21689 21244 21683 21207 17349 18299 18624 18794 18997 18862 19304 18839 19356 18963 23045 22480 22019 21850 21773 21482 21844 21298 21856 21334 21424 21318 21632 21557 21522 21544 21594 18404 19393 19978 19803 19875 19863 20053 19706 20057 19719 22665 22082 21966 21725 21632 21546 21566 21705 21376 21573 21422 21575 21672 21583 21483 21456 21584 19636 20244 20308 20552 20516 20636 20494 20765 20466 23117 21959 22103 21418 21864 21284 21808 21271 21800 21283 21750 21252 21757 21394 21738 21281 21730 21268 20972 20689 21222 20631 21321 20680 21410 20754 21464 21805 22181 21464 21847 21413 21856 21400 21635 21445 21652 21360 21664 21360 21521 21397 21603 21198 21776 21274 21743 21304 21793 21228 21700 21320 21656 21258 21669 21240 21728 21305 21784 21280 21780 21255 21728 21249 21691 21179 21794 21194 21831 21379 21667 21125 21723 21444 21746 21350 21626 21289 21575 21284 21729 21280 21721 21170 21674 21159 21622 21276 21723 21349 21652 21257 21632 21297 21737 21224 21696 21417 21648 21152 21709 21479 21536 21421 21424 21296 21680 21205 21681 21100 21691 21480 21616 21548 21515 21338 21760 21284 21786 21225 21607 21609 21529 21418 21614 21348 21813 21324 21608 21585 21705 21367 21703 21321 21872 21235 21528 21518 21483 21684 21468 21607 21517 21697 21484 21713 21497 21557 21612 21354 21571 21581 21349 21621 21616 21373 21590 21586 21436 21709 21564 21601 21600 21627 21146 21794 21609 21360 21457 21788 21217 21636 21539 21517 21352 21767 21403 21642 21467 21720 21295 21776 21408 21665 21457 21720 21275 21805 21437 21575 21392 21809 21292 21729 21424 21784 21397 21813 21438 21669 21278 21801 21383 21831 21431 21836 21175 21746 21396 21770 21088 21832 21413 21680 21129 21692 21386 21682 21403 21746 21331 21689 21351 21794 21137 21638 21149 21783 21172 21682 21191 21900 21232 21799 21271 21863 21429 21754 21378 21836 21624 21753 21357 21856 21505 21722 21359 21773 21399 21785 21330 21804 21441 21673 21273 21763 21169 21642 21401 21728 21200 21615 21336 21760 21297 21592 21364 21733 21454 21488 21360 21644 21524 21540 21275 21641 21593 21728 21260 21563 21477 21959 21193 21504 21353 21897 21479 21508 21335 21608 21651 21509 21236 21648 21625 21432 21778 21655 21643 21538 21431 21440 21730 21546 21612 21926 21608 21696 21556 21369 21627 21671 21656 21470 21537 21627 21703 21440 21299 21485 21720 21494 21508 21422 21760 21569 21705 21221 21701 21527 21779 21401 21717 21504 21766 21417 21561 21414 21793 21350 21678 21409 21848 21287 21820 21457 21653 21288 21837 21388 22184 21485 21796 21338 21836 21420 21743 21497 21719 21274 21856 21186 21841 21371 21740 21389 21728 21334 21707 21238 21668 21260 21837 21357 21856 21281 21767 21248 21672 21208 21787 21287 21808 21333 21852 21280 21789 21466 21731 21228 21742 21337 21711 21319 21777 21285 21652 21160 21791 21373 21680 21675 21723 21389 21687 21335 21592 21394 21852 21280 21689 21145 21831 21463 21691 21335 17153 17516 18116 17994 18358 18074 18357 18039 18621 18331 22993 22400 22221 21636 21738 17424 18589 18747 19264 18932 19452 19085 19463 19492 19287 23114 22540 21851 22204 21474 21516 19140 19549 19896 19937 20019 20149 19982 20103 20016 23248 22400 22071 21893 21691 21751 19544 20333 20246 20592 20571 20745 20485 20873 20538 20867 22204 22127 21517 21800 21440 20800 20675 21114 20876 21285 21015 21277 20928 21292 21042 22210 21592 21857 21415 21830 21325 21857 21521 21819 21072 21801 21280 21849 21211 21856 21340 21799 21370 21656 21440 21863 21419 21603 21253 21849 21159 21872 20681 21735 21203 21650 21288 21780 21385 22018 21237 21552 21248 21853 21185 21800 21160 21809 21304 21685 21224 21776 21262 21817 21338 21712 21396 21581 21305 21537 21288 21719 21128 21658 21325 21623 21337 21698 21125 21716 21241 21632 21351 21729 21265 21679 21319 21617 21376 21796 21616 21633 21440 21667 21335 21800 21218 21608 21440 21799 21256 21681 21602 21462 21303 21641 21418 21597 21331 21903 21335 21473 21303 21828 21280 21524 21381 21778 21856 21712 21600 21497 21510 21587 21707 21591 21610 21606 21622 
32677 33140 33710 42357 34728 34679 32832 33896 42291 33082 42951 35227 41958 36486 42520 34832 33201 33575 33257 35702 40088 36491 33136 34080 33360 36727 41248 36267 42309 33756 42900 37024 39189 36360 41565 33926 41696 36725 40416 36017 42448 36828 41104 36613 41361 36395 42560 36519 39023 36021 42176 35651 39494 35494 41384 36531 40775 35932 40148 36154 41736 36069 40832 36348 41514 35158 38823 35008 40344 41344 40512 37166 40999 36013 41472 36359 39605 34992 41352 36505 40440 35895 41284 34330 40320 34983 41287 35303 41050 35859 41815 39440 41584 36840 40131 34197 41533 36258 39783 34276 41251 37064 40588 43096 41443 37399 39686 33000 41321 37712 40961 42944 41997 42823 42346 41399 41777 42816 42038 35272 39564 34321 34160 34157 41243 43112 43351 34039 32768 32474 41518 34342 40978 33676 41760 34048 32568 40951 33536 41730 42976 33953 39000 34552 36620 33856 41968 33096 32362 42551 42400 43182 43149 33236 41268 35351 41705 34816 40844 35584 38833 35671 39628 34844 40310 35063 40385 34602 42549 34985 33398 35143 40704 35544 40281 35824 41434 35088 41129 34795 42581 33699 42304 34281 31079 35195 35584 37248 37696 39971 38925 30253 39216 42089 42192 42315 35808 36800 43116 36163 41811 34715 41329 34544 41024 34057 40904 34423 40873 37545 41047 33719 41566 34440 41248 33253 41272 42701 41893 34429 40992 35309 40742 35700 41042 35656 38424 36589 38669 36072 41142 34855 39920 34579 40376 34759 40602 34887 39846 35137 40616 34136 40448 33915 40746 35736 39751 34673 34325 33882 38304 35521 40176 34696 40170 35194 40035 34592 39537 36057 39928 35777 38960 35756 38697 35873 40551 34611 40359 34132 39206 35818 39874 34898 38786 35338 41108 33501 40192 33848 40269 35820 34631 34077 41496 34340 41171 34176 40368 36430 39881 35492 40101 34592 41528 35344 40480 34688 39913 35648 38859 34778 40642 35300 41252 35964 38067 34919 42892 38870 40790 36121 41508 35612 42395 42048 41819 37144 41272 32800 42816 33308 40884 35702 39943 43018 41892 37552 41889 33606 34026 42504 40375 33861 33580 33964 40548 35632 33459 34728 40681 36281 41870 35320 40565 35508 41704 34135 41841 35478 33671 42180 41420 42939 33938 42088 43056 34804 33040 33325 41798 41738 35703 33177 32596 41812 42932 34616 34344 42913 41954 43052 35488 34631 32726 37664 39327 41303 32791 33046 34040 31961 37241 33391 37338 36696 43456 36440 36677 33173 36577 33608 34705 42536 33418 40272 33089 42376 35274 41863 35748 41248 33185 38952 33896 40599 36221 42282 35715 41698 35304 41952 42039 42294 34388 40816 36144 41963 35433 41370 36986 41805 35694 40622 43056 38931 42742 40633 34984 40048 35931 41456 36673 42183 36647 41830 35740 41798 36536 41476 36204 41664 36464 41671 35891 40592 34676 40100 34217 39472 33621 39447 34522 39409 35720 40097 34199 39012 34535 40034 34263 39522 34414 39264 34090 40504 35117 40472 36248 41218 35456 41472 36896 40805 36177 41433 36486 39944 36067 40154 35704 40000 35964 40512 34977 40104 34521 38227 35521 41402 43112 40216 34695 41335 36281 41190 35973 40201 35975 41144 34896 39549 34459 40561 43177 39072 34432 41440 36885 41110 35061 40470 35280 40359 35346 39866 33545 39769 35788 41603 36157 41257 34169 40576 34610 41136 42977 43099 37156 41403 33909 40849 34306 32978 41479 42881 36200 42464 34600 40178 43159 40252 37332 34589 34228 41472 34664 41495 42435 33793 35858 40193 33288 40379 43014 43168 37004 41322 34168 39911 33949 42467 36356 41833 32944 40985 42824 36934 31771 32197 32097 32937 34565 35584 35936 35293 36707 43013 38599 38875 33600 34017 33926 33971 34034 42680 41652 33056 33309 34385 34203 33376 33045 33896 40960 41970 42701 35139 41873 34128 42185 34059 42496 34861 41188 34072 33771 33367 40371 34624 33501 33799 38922 34540 32668 33703 39028 35622 42853 34151 40209 35622 41787 39638 41024 35143 42130 38477 41464 35473 41532 33265 41389 37185 39938 35552 42594 36361 39888 36088 41958 34890 39802 36771 41748 34661 40988 36765 40120 34487 41847 35366 38826 35812 40732 34837 40908 36768 41696 34544 40888 37816 40069 35780 40336 35671 39025 36565 40600 35047 41543 37601 40336 37433 42252 35815 40341 35562 40624 35841 40967 35689 40755 34667 40688 36217 39982 35757 40141 34650 41575 35879 39696 36795 39850 34796 38861 35012 41066 36120 41660 37364 41123 35719 39856 36341 40839 34743 38889 35441 32743 34304 40104 34592 40693 35201 41415 35813 41175 36034 41772 35729 40896 36080 41347 36136 40748 36953 42261 36228 41584 35880 40939 34064 38864 34278 40969 34277 40160 34016 40284 34715 41735 36004 41521 34080 41498 34924 41863 35577 41955 35107 42352 36763 34442 36632 34329 36384 32231 41280 41639 34313 40288 32678 40600 32213 40128 32456 40666 38232 38217 35562 41491 32808 40897 33325 40391 32745 41993 34357 40461 33804 41654 35464 41308 43008 34001 33480 34140 32522 33866 41200 43305 41828 33621 42517 42728 33823 33718 34071 35591 34237 33117 34406 33904 33585 33464 33832 33303 32371 33750 42210 43255 42328 42679 41384 42689 40448 33804 39975 33776 42060 34579 32789 33221 42671 34752 42735 35561 42697 34998 33250 35682 42848 35416 33324 34884 32696 35163 41481 34759 41697 34099 41406 34723 41138 35938 41927 36913 41386 36498 42071 36645 40614 35429 38923 35288 41367 36312 42400 36564 42007 35531 38792 35552 41225 36341 42176 36560 41370 33408 40832 36928 42390 37637 40988 34800 41380 37046 40394 36852 40896 33292 41456 37283 40755 35584 34451 35611 42150 35157 40726 35592 39863 37235 40835 35975 39254 34976 40885 36337 40717 35734 39280 36631 40340 34609 38796 36924 40440 34817 35955 36999 41653 35951 40215 34330 41759 34915 39768 35440 40768 35905 40452 34385 41062 35000 40904 34944 40810 36132 41744 36576 40432 34241 40248 35178 40367 34749 41579 34759 40341 36261 40624 34304 39762 36642 40389 33373 41747 36374 33920 40744 36276 38592 38346 40760 36163 42197 38576 37767 34216 35925 40564 35512 41698 43214 41912 34368 39936 36588 41008 33561 32864 34349 41686 37199 41440 35914 33754 33584 39252 36932 41105 33236 32956 33588 40247 35232 40367 35864 41926 33667 33380 33793 33820 33964 33378 32378 34869 32884 34048 34407 41472 33756 42149 33984 34780 41700 34352 41745 34266 33440 41365 34336 33002 32631 35099 40746 34845 33066 34149 42902 33664 33079 33781 32544 33383 42609 35929 41896 36802 40288 35028 41683 34775 42570 33849 42443 42993 33924 34261 32422 34341 42922 36416 41585 35853 40193 36205 36179 35112 41280 35770 41921 36116 32916 35335 42341 34441 42368 34503 42200 35168 42715 35031 41559 35248 42202 36868 41547 36595 40992 36823 41376 36045 41001 37042 41104 37696 40412 37136 41736 37414 40407 36327 41772 38181 41612 38289 40960 36913 42616 37559 41846 35591 41547 35878 40304 35680 41634 35504 41325 35870 40661 36944 41541 35523 41776 35200 40928 35044 40346 37651 39175 36631 39920 35961 42343 36561 38241 36003 40184 35831 41159 35106 41096 34936 41058 33552 40960 36135 41734 35745 41051 35898 40788 35441 39797 35328 40964 35957 41656 34565 41634 36147 40987 35233 40431 36471 40784 36694 35755 34595 39276 35132 40665 34515 41780 36137 40571 35096 40709 35633 40744 35813 40807 36008 43072 34695 42408 33774 41496 35109 40314 36352 41076 35715 42631 33538 33596 33205 42296 36370 40368 36931 41220 33717 33759 33230 41420 33501 41537 37192 41720 34248 41824 42949 34758 33527 41382 36696 40027 35765 32516 42644 33248 33540 41582 37080 40659 33803 41952 43116 34752 42112 35182 34317 42615 33205 34166 33017 35328 41093 35920 33136 41414 33893 35063 42376 34600 42488 34728 32689 32736 34285 34460 42771 35296 41423 35359 34048 33429 33904 32752 33056 35229 41984 36176 40913 35543 33668 33122 33255 35160 33800 42619 33245 34850 42553 35680 42825 35627 42535 34958 42706 39211 42946 36226 42378 36413 41409 36040 42598 33773 42117 35964 39695 36773 41845 34707 41815 36535 40734 34264 41479 37346 41136 36495 41728 36634 42274 36652 41546 34039 41112 36240 43040 37010 40715 36680 40336 36520 42561 37557 41530 36279 41026 37128 40880 36136 40192 36839 41488 36536 40994 35862 39862 36429 41425 35121 40967 35064 42064 34569 40151 36544 41537 35795 39858 36536 40543 36373 40324 38790 41088 36304 40919 35282 41696 35298 40161 36250 40919 34955 40038 35159 41323 35931 41926 35841 40763 35833 41259 34650 40357 36934 41388 35457 42100 31000 38343 37304 33623 37358 35724 39638 35053 40437 39168 35214 38467 38696 33662 35849 41996 36893 41321 39507 42266 34964 39656 35201 40408 35136 40027 39561 40007 32796 34567 36811 35545 40010 35399 40544 36632 39232 43403 38829 36932 35993 42756 36932 40748 36899 41256 42195 41321 34315 33401 32727 33028 33761 40519 41112 37445 35682 36261 36227 38224 34631 38219 34660 34976 39098 38324 35689 34060 33192 33540 35084 41288 33904 42086 34051 34566 33891 42762 42617 33933 33456 39888 40945 32863 31979 33477 31879 34988 42344 40470 38288 39744 42240 37180 40604 36329 40585 36304 40640 35991 40152 36195 41632 35890 40513 35633 40316 37680 34321 40069 33888 40964 34339 41750 35072 42420 36651 40400 42698 37168 42051 36967 41789 34584 42254 34741 41280 34754 41274 33172 41655 34313 39877 35873 40501 36102 40794 36238 40251 35248 40907 34732 40241 34960 40229 35511 40880 36124 40397 36045 40375 35508 40085 35339 39732 36172 39816 36825 41580 34984 38952 35680 42195 35915 41401 34610 40636 34001 40448 35608 40384 35625 39432 34978 39488 34465 40471 35744 41400 34692 40256 34279 40624 35840 40092 35072 41984 34585 39072 35504 42805 33317 42064 42224 40896 34947 39912 35015 38820 35276 42617 34344 33280 32812 41099 35702 40522 36213 40224 34401 34066 32978 41892 34560 41222 36600 41137 34269 33635 35067 41658 35516 41050 37129 40372 33195 32864 42688 35181 42573 34515 32935 34861 42724 35538 42928 33818 34083 41357 33857 33760 41290 34560 33975 41713 34135 33632 42129 35652 33552 33811 33702 34354 39183 36160 34147 41250 42656 36358 40018 34426 33116 32856 41170 36088 41961 34682 42624 35617 40948 35911 41715 34881 42320 35614 40608 36577 42432 34072 41440 36471 40759 35648 41904 36168 41789 36640 42427 35056 40615 36423 41737 36875 42353 36922 39755 35810 41682 36055 38496 36609 42028 34996 39008 35232 41611 35121 41924 35906 41168 35280 41481 36248 39062 34486 39341 36217 39501 34998 39815 37466 40176 36467 40594 37259 42245 36131 41456 36868 34254 35766 41593 36935 32682 35271 41675 36200 41921 36282 41075 36480 42193 35109 40474 35907 39475 34562 41782 35575 39668 34584 41091 35712 40685 34039 41384 35826 42519 43040 41691 34709 32851 32961 40471 34598 33863 35200 40312 33848 42607 38379 39940 32727 41293 37484 42912 33019 41192 34272 34440 32695 40067 34477 34293 42023 36071 34661 34445 32999 42140 42380 35728 33284 34050 37424 34099 34800 33299 41517 34757 34816 34448 42632 33420 34345 35191 42008 41191 43200 35650 42888 33034 42036 35751 33488 35096 40089 35346 33105 35789 41840 35644 32517 35587 42021 33856 41876 36281 41402 35224 41805 36960 40800 36692 42422 34861 40539 36952 41739 40480 43168 36375 41286 36870 42140 36160 42972 35804 40500 36902 39623 36779 41794 35924 41802 35584 41193 35558 40328 34848 40293 36928 41656 36935 40553 36057 39993 34887 39853 36297 40776 36327 41229 37074 40453 36365 42603 35840 40236 35971 41269 35720 41104 36036 40665 34660 39296 36418 41828 34989 34825 35466 41778 35360 41307 34092 41543 37088 40448 35254 39236 36785 42695 35471 41304 37393 31332 37462 36483 40240 37496 40312 37304 32969 39901 38786 42440 41225 34480 35549 29783 32193 34066 39348 36346 41701 38167 31705 31602 39783 40187 33733 36832 40692 42821 33200 38244 32873 36326 36942 37840 39345 37600 38849 37716 41397 42585 39563 37376 35203 35872 32498 41089 40358 33273 32897 34663 31737 36071 32531 36032 40639 40240 33235 35985 42059 35554 34120 38916 36424 40687 38104 40773 36944 40789 38240 40681 34040 36718 42136 36812 41252 37046 32882 36407 38311 36322 40402 37013 40160 36886 41339 36512 41672 34770 42002 37315 42240 34338 40173 36999 39554 37073 34412 35620 39889 34592 40515 36058 41657 38583 40476 33428 39872 37125 39659 36266 39354 36373 40806 35205 40054 35872 40457 36631 41285 35350 41653 34136 40821 33335 40466 35684 38981 34752 41154 34665 41208 35241 38976 35386 40379 34279 41433 35666 40295 35288 41088 34393 41259 36277 34016 34083 41961 35000 41280 36334 40021 34224 41984 36528 40228 35028 33884 42393 41264 34656 41972 34372 41100 37747 41413 42849 41303 36668 40421 33128 41460 36041 36640 35140 33778 42817 33154 33693 35216 33930 34039 33965 34204 
23561 23468 23707 23303 23725 23474 23634 23535 23670 23328 23795 23248 23649 23429 23472 23517 23767 23259 23745 23353 23889 23453 23782 23815 23798 23339 23461 23453 23770 23168 23847 23309 23463 23384 23818 23285 23882 23338 23584 23303 23872 23199 23728 23418 23751 23277 23804 23284 23844 23371 23826 23154 23628 23220 23819 23117 23687 23401 23599 23207 23686 23309 23616 23188 23799 23264 23780 23321 23772 23136 23636 23252 23520 23230 23676 23427 23843 23291 23763 23266 23600 23311 23764 23141 23598 23371 23653 23648 23720 23372 23620 23373 23591 23335 23488 23392 23604 23492 23565 23289 23612 23637 23539 23346 23529 23617 23304 23344 23615 23610 23520 23429 23578 23623 23418 23345 23523 23648 23601 23372 23468 23697 23387 23265 23632 23433 23296 23506 23461 23664 23417 23450 23513 23575 23453 23528 23367 23640 23542 23628 23469 23693 23496 23668 23232 23624 23505 23712 23356 23362 23591 23471 23548 23393 23654 23316 23619 23364 23672 23126 23768 23151 23670 23208 23721 23140 23754 23335 23680 23148 23701 23251 23700 23201 23752 23207 23648 23250 23617 23308 23595 23367 23594 17152 19398 19791 20181 20264 20419 20452 20627 20560 20784 26029 25089 24274 24440 23881 24054 23675 23938 23560 23884 23502 23816 23533 23784 23476 23721 23512 23600 23494 23692 23395 23628 23440 23515 23484 23560 23449 23751 23347 23749 23260 23833 23138 23791 23152 23800 23202 23733 23164 23595 23278 23630 23214 23648 23328 23692 23192 23511 23281 23621 23281 23644 23152 23717 23306 23597 23160 23685 23197 23601 23215 23630 23248 23645 23209 23712 23119 23685 23351 23663 23100 23727 23274 23573 23303 23606 23124 23752 23248 23630 23195 23607 23333 23517 23409 23488 23185 23636 23226 23632 23204 23576 23414 23529 23337 23543 23171 23696 23194 23542 23367 23468 23236 23481 23233 23661 23149 23528 23358 23560 23252 23626 23239 23532 23309 23433 23320 23607 23269 23479 23315 23377 23268 23544 23205 23523 23552 23434 23285 23761 23226 23453 23602 23431 23204 23406 23445 23403 23286 23731 23223 23286 23303 23755 23121 23367 23336 23697 23201 23344 23357 23724 23220 23409 23312 23658 23084 23444 23237 23681 23427 23157 23560 23483 23405 23201 23527 23460 23664 23368 23458 23227 23694 23386 23593 23208 23555 23484 23619 23436 23421 23309 19741 20537 21000 21008 21120 21143 21488 21344 21652 21373 25058 24269 24229 23879 24056 23680 23791 23420 23706 23512 23796 23536 23812 23378 23592 23235 23632 23413 23836 23379 23808 23362 23673 23212 23582 23235 23655 23408 23781 23365 23703 23433 23665 23303 23531 23120 23795 23212 23605 23331 23800 23324 23815 23304 23818 23305 23792 23262 23705 23252 23663 23225 23575 23047 23563 23023 23556 23145 23643 23420 23605 23209 23607 23117 23724 23191 23700 23146 23604 23167 23671 23127 23638 23147 23503 23156 23632 23169 23595 23265 23527 23196 23577 23094 23597 23259 23640 22997 23766 23189 23639 23127 23638 23222 23638 23207 23737 23218 23640 23335 23576 23122 23598 23221 23576 23263 23471 23163 23552 23132 23469 23163 23603 23306 23616 23287 23638 23202 23514 23252 23582 23129 23535 23349 23517 23283 23648 23285 23568 23160 23541 23144 23479 23394 23456 23232 23628 23473 23557 23255 23489 23296 23526 23206 23680 23555 23543 23360 23598 23223 23401 23205 23605 23520 23424 23318 23377 23381 23350 23534 23701 23273 23433 23192 23632 23306 23796 23369 23491 23165 23490 23274 23662 23548 23363 23269 23539 23276 23613 23334 23444 19461 20970 21409 21741 21937 21760 22000 21796 22194 21965 25145 24116 24108 23719 23976 23486 23559 23559 23605 23533 23553 23335 23605 23504 23687 23349 23536 23414 23670 23316 23440 23398 23660 23381 23675 23307 23757 23353 23561 23349 23673 23408 23573 23239 23645 23418 23548 23137 23705 23369 23604 23213 23718 23325 23607 23309 23775 23320 23616 23251 23748 23253 23528 23278 23719 23216 23524 23293 23736 23121 23687 23224 23663 23094 23797 23278 23613 23216 23721 23255 23541 23296 23739 22601 23630 23387 23552 23136 23780 23273 23542 23271 23759 23138 23521 23339 23770 22991 23672 23108 23673 23124 23667 23173 23460 23232 23719 23211 23629 23216 23686 23270 23543 23210 23669 23153 23539 23126 23452 23191 23734 23161 23596 23082 23520 23096 23718 23144 23610 23139 23636 23168 23538 23235 23596 23096 23524 23262 23644 23259 23579 23177 23605 23259 23581 23199 23527 23117 23504 23232 23588 22966 23463 23312 23394 23111 23502 23197 23535 23121 23453 23409 23074 23164 23492 23207 23561 23200 23424 23233 23489 23334 23545 23377 23588 23453 23656 23414 23609 23500 23623 23416 23582 23399 23433 23273 23383 23105 23460 23218 23478 23503 21683 21719 22177 22048 22323 22186 22247 22183 22382 24747 24091 23793 23746 23543 23540 23446 23563 23453 23621 23528 23696 23612 23687 23591 23497 23324 23326 23406 23053 23296 23241 23458 23164 23591 23406 23565 23547 23544 23393 23596 23427 23555 23386 23464 23291 23327 23215 23402 23249 23593 22775 23484 23274 23437 23261 23529 23227 23587 23253 23629 23202 23607 23300 23456 23289 23497 23281 23515 23233 23553 23300 23535 23045 23405 23129 23568 23277 23637 23242 23702 23336 23707 23296 23725 23277 23752 23222 23632 23376 23545 23051 23656 23263 23734 23220 23758 23261 23688 23083 23612 23095 23648 23271 23792 23283 23709 23136 23475 23117 23628 23320 23698 23222 23751 23128 23714 23266 23813 23063 23612 23082 23736 23204 23597 23072 23676 23110 23639 23159 23623 23214 23488 23277 23556 23232 23590 23062 23626 23168 23674 23100 23672 23169 23616 23197 23663 23090 23656 23152 23506 23040 23616 23185 23578 23268 23671 23235 23674 23175 23514 23210 23571 23136 23561 23214 23556 23176 23628 23286 23512 23217 23656 23192 23526 23143 23601 23199 23535 23262 23490 23164 23491 23245 23496 23103 23573 23250 23505 23346 23620 23168 22301 22460 22789 22461 23005 22706 22778 22897 23048 22584 24098 23549 23613 23567 23616 23476 23712 23301 23696 23560 23484 23176 23763 23298 23352 23488 23432 23127 23509 23183 23452 23336 23328 23480 23413 23285 23620 23222 23477 23631 23523 23235 23660 23354 23270 23576 23307 23460 23428 23532 23371 23585 23261 23573 23226 23474 23398 23287 23493 23440 23394 23631 23219 23600 23251 23483 23495 23361 23395 23501 23463 23563 23274 23591 23180 23702 23227 23572 23408 23498 23361 23343 23443 23471 23335 23638 23150 23639 23106 23731 23261 23621 23273 23624 23304 23513 23309 23452 23399 23541 23281 23623 23240 23728 23187 23709 23095 23717 23053 23655 23003 23744 23162 23692 23221 23692 23290 23620 23215 23585 23299 23560 23274 23433 23277 23467 23337 23476 23325 23650 23341 23673 23333 23572 23337 23574 23334 23488 23284 23398 23265 23475 23308 23632 23154 23622 23160 23636 23168 23714 23148 23639 23144 23616 23097 23681 23152 23640 23104 23612 23044 23609 23200 23620 23063 23673 23209 23570 23179 23616 23153 23634 23148 23592 23085 23597 23135 23658 23151 23587 23164 23625 23116 23538 23358 23511 23277 23461 23265 23562 23175 23442 23189 23545 23232 23620 23192 23606 23088 23559 23159 23572 23303 23527 23347 23205 23140 23466 23223 23623 23193 23642 23234 23552 23176 23428 23300 23367 23203 23454 23351 23718 23244 23510 23065 23489 23434 23492 23267 23269 23408 23608 23301 23450 23152 23510 23643 23399 23285 23597 23259 23645 23231 23432 23536 23329 23424 23237 23323 23687 23268 23509 23456 23324 23492 23205 23296 23709 23081 23440 23596 23237 23498 23229 23279 23607 23200 23474 23429 23377 23612 23130 23748 23271 23653 23424 23623 23209 23583 23290 23537 23480 23401 23411 23527 23283 23560 23317 23568 23383 23353 23424 23518 23335 23613 23066 23664 23236 23586 23307 23511 23438 23493 23430 23584 23273 23632 23408 23623 23063 23676 23155 23652 23110 23690 23396 23668 23276 23671 23309 23719 23351 23640 23226 23681 23173 23712 23320 23616 23234 23744 23137 23590 23188 23785 23140 23560 23232 23811 23200 23641 23104 23687 23284 23709 23192 24008 23118 23708 23293 23813 23354 23611 23111 23646 23309 23703 23144 23704 23093 23741 23201 23627 23054 23431 23204 23739 23185 23547 23250 23671 23331 23575 23168 23527 23307 23552 23143 23816 23276 23664 23119 23625 23247 23656 23147 23703 23287 23561 23173 23466 23311 23671 23221 23719 23259 23520 23176 23690 23285 23478 23278 23542 23040 23656 23271 23543 23286 23484 23152 18228 19072 19887 19869 20360 20110 20630 20271 20628 20373 25863 24706 24624 24011 24201 23893 23872 23475 23904 23554 23779 23531 23707 23648 23746 23350 23808 19351 20700 20695 20839 21201 21197 21348 21337 21081 21642 24866 24720 24009 23977 23985 23719 23863 23758 23433 23705 23576 23840 23472 23728 23400 23407 23617 20602 21459 21447 21730 21662 21867 21893 21992 22006 25649 24492 24246 23864 23968 23518 23905 23439 23809 22800 23836 23538 23825 23456 23703 23509 23728 23497 21880 22021 22280 22276 22304 22363 22413 22392 22417 24603 23988 23744 23902 23541 23754 23543 23733 23527 23695 23463 23663 23435 23671 23453 23727 23442 22449 22499 22944 22738 23072 22765 23113 22759 22712 22811 24356 23562 23652 23432 23596 23409 23610 23417 23674 23491 23703 23300 23787 23203 23863 23275 23839 23289 23798 23196 23691 23267 23658 23320 23547 23354 23735 23359 23536 23185 23648 23208 23832 23146 23801 23244 23634 23119 23663 23155 23707 23308 23652 23383 23731 23314 23595 23272 23687 23271 23697 23283 23629 23203 23622 23335 23590 23383 23609 23380 23701 23234 23646 23228 23677 23288 23653 23172 23640 23278 23523 23408 23591 23310 23534 23359 23798 23388 23552 23380 23565 23533 23502 23324 23406 23329 23716 23398 23582 23233 23565 23712 23428 23279 23576 23283 23644 23232 23535 23648 23537 23399 23581 23198 23652 23258 23506 23593 23581 23310 23367 23504 23537 23458 23354 23683 23162 23685 23472 23412 23473 23556 23221 23686 23428 23395 23475 23560 23351 23707 23398 23624 23511 23625 23246 23640 23344 23618 23488 23619 23456 23800 23383 23516 23446 23740 23104 23704 23427 23496 23288 23780 23215 23573 23402 23655 23239 23819 23292 24024 23377 23845 23080 23730 23360 23616 23221 23782 23162 23613 23425 23688 23288 23732 23413 23705 23207 23770 23324 23669 23278 23872 23310 23715 23104 23720 23232 23698 23312 23750 23247 23648 23348 23645 23268 23606 23239 23571 23175 23695 23287 23432 23171 23704 23276 23041 23216 23662 23342 23536 23242 23614 23204 23536 23242 23625 23253 23528 23283 23632 23313 23590 23234 23688 23373 23630 23333 23637 23284 23657 23339 23605 23310 23376 23252 23541 23462 23356 23342 23515 23479 23462 23284 23552 23381 23655 23254 23414 23298 23687 23175 23415 23425 23760 23501 23459 23355 23453 23634 23366 23296 23484 23505 23683 23328 23387 23319 23772 23305 23319 23533 23396 23623 23117 23616 23511 23716 23341 23441 23505 23555 23445 23395 23443 23692 23441 23453 23348 23688 23424 23495 23316 23777 23488 23650 23233 23592 23419 23735 23304 23712 23363 23778 23385 23459 23168 23737 23404 23643 23255 23808 23316 23573 23177 23799 23289 23669 23353 23830 23061 23744 23297 23671 23217 23750 23233 23687 23388 23687 23221 23783 23155 23781 23289 23697 23129 23607 23181 23833 23162 23706 23162 23636 23104 23670 23222 23513 23188 23655 23088 23701 23179 23774 23153 23627 23194 23525 23198 23616 23180 23552 23348 23643 23431 23732 23239 23591 23201 23666 23236 23607 23313 23698 23290 23520 23161 23564 23296 23557 23237 23382 23293 23713 23301 23544 23229 23707 23338 23556 18514 19772 19776 20204 20170 20589 20283 20553 20337 26910 25157 24603 24488 24213 23913 20103 20440 20739 21276 21253 21176 21593 21191 21576 21303 25095 24753 24200 24164 24050 20583 21336 21804 21644 22055 21707 22149 21879 22121 22016 25123 24506 24096 24053 23987 23865 22090 22272 22498 22381 22538 22352 22712 22375 22774 24683 24288 23784 24133 23624 24005 22460 23148 22722 23304 22742 23235 22715 23328 22764 23351 23568 24088 23392 24025 23412 23983 23446 23824 23426 23808 23501 23728 23449 23813 23423 23645 23409 23755 23450 23801 23287 23891 23238 23879 23296 23792 23337 23704 23471 23768 23355 23694 23274 23716 23201 23787 23360 23745 23223 23742 23316 23608 23143 23744 23203 23757 23224 23644 23382 23617 23335 23646 23362 23703 23468 23645 23452 23653 23360 23644 23290 23675 23242 23677 23368 23660 23369 23677 23271 23577 23399 23526 23219 23626 23439 23530 23424 23706 23317 23605 23603 23543 23428 23808 23349 23456 23379 23847 23409 23554 23727 23445 23240 23471 23639 23371 23264 23520 23651 23536 23419 23677 23468 23367 23591 23510 23492 23334 23742 23415 23536 23397 23749 23496 
22760 22137 22901 22264 22769 22362 22802 22429 22835 22223 22894 22344 22746 22385 22562 22319 22870 22740 22784 22379 22743 22309 22807 22359 22766 22400 22701 22487 22875 22845 22630 22649 22629 22389 22848 22411 22675 22874 22473 22322 23065 22118 22392 22534 22660 22330 22666 22658 22392 22298 23109 22124 22471 22711 22483 22255 22656 22709 22520 22899 22540 22337 22391 22903 22247 22516 22695 22888 22213 22572 22611 22674 22348 22810 22667 22679 22667 23015 22551 22583 22377 22962 22364 22518 22418 22860 22282 22844 22504 23010 22253 22775 22465 22768 22070 22853 22364 22807 22211 22912 22488 22919 22101 23040 22442 22774 22057 22999 22512 22903 22346 22833 22464 22857 22071 23053 22481 22871 22042 22802 22205 22902 22133 22842 22375 22865 22231 22680 22150 22971 22339 22707 22184 22889 22336 22744 22197 22740 22329 22805 22056 22632 22354 22765 22122 22660 22272 22817 22357 22829 22231 22735 22357 22603 22186 22664 22374 22567 22296 22628 22555 22785 22113 22524 22242 22968 22460 22611 22246 22548 22871 22438 22225 22443 22408 22964 22179 22378 22324 22995 22428 22759 22488 22679 22760 22320 15564 15693 15962 16055 16042 16144 16370 22918 22677 22497 22434 22224 22365 22099 22145 21722 22091 21857 21831 21637 21803 21861 21729 21831 21760 22002 21699 21815 21616 22000 21625 21988 21723 21945 21598 21712 21751 21725 21580 21486 21497 21492 21904 21514 22032 21328 22196 21981 21863 21415 21565 21373 21655 21613 21771 21576 21608 22016 21418 22040 21468 22061 21683 21873 21643 22217 21745 21668 21716 21913 21493 21972 21574 21916 21557 21753 21709 21682 21829 21654 21804 21774 21639 22055 21580 22024 21616 21943 21772 21799 21797 21840 21544 22177 21267 22144 21623 21882 21779 21833 21581 21977 21521 22128 21463 22083 21632 22010 21689 22064 21497 22306 21417 22059 21673 21828 21783 22087 21315 22167 21647 21819 21673 22151 21183 22262 21513 22195 21664 22145 21343 22287 21505 21994 21543 22354 21321 22096 21645 22090 20980 22310 21635 21980 21525 22234 21521 21981 21777 22343 21395 22064 21669 22224 21399 22119 21466 22323 21428 22069 21463 22234 21471 22137 21429 22248 21655 22119 21529 22035 21616 22128 21511 22144 21665 22144 21425 22102 21504 22242 21544 22022 21441 22192 21527 22322 21365 22264 21412 17113 16721 17705 17127 17859 17378 18031 17775 18252 22705 23076 22644 23080 22514 22837 22313 22515 22003 22500 22008 22441 22071 22487 21773 22235 21866 22198 21813 22291 21946 22325 21716 22264 21655 22153 21607 22184 21927 22237 21896 22373 21840 22016 21674 22150 21736 22116 21853 22149 21921 22264 22033 22266 22231 22428 22054 22186 21818 21849 21680 22104 21611 21895 21904 22080 21659 21957 21707 21938 21683 21986 21863 22073 21877 21952 21767 22062 21793 21945 21945 22021 21760 21978 21768 21960 21719 21969 21883 22224 22415 22108 22276 22093 22449 21953 22408 21811 22129 21817 22177 21905 22049 21764 22048 21808 21998 21817 22168 22009 22188 22016 22337 22103 22348 22029 22435 22064 22411 21943 22275 21740 22312 21653 22116 21832 22368 21939 22387 21944 22521 22053 22427 21944 22285 21731 22025 21721 22313 22008 22468 21969 22534 21961 22337 21638 22087 21735 22359 22028 22578 21992 22444 21785 22475 21533 22394 21925 22625 21928 22510 21707 22172 21619 22414 21951 22551 21970 22355 21808 22279 21827 22466 22066 22430 21837 22210 21785 22560 22025 22519 21746 22273 21743 22513 21760 22375 21563 22433 21840 22430 21775 18720 18136 18832 18757 19357 18816 19351 19023 19703 18984 23481 22669 23191 22449 22988 22203 22556 22283 22871 22002 22647 22038 22756 22292 22534 21967 22381 22220 22509 22042 22611 22136 22474 21952 22353 21907 22506 22048 22406 21943 22494 21999 22236 21963 22529 21900 22338 21902 22496 22029 22299 21993 22410 22016 22382 21905 22560 22041 22393 21696 22677 22012 22368 22080 22562 22040 22221 22281 22240 21927 22192 22359 22272 21833 22510 22130 22216 21834 22730 22080 22141 22471 22248 21900 22381 22407 22258 22033 22560 22110 22003 21894 22618 22023 22082 22417 22093 21925 22256 22411 22184 21895 22722 22042 21984 21966 22660 22097 22133 21941 22149 22464 22263 22664 21872 22554 22248 22392 22120 22375 21991 22582 22315 22460 22090 22080 22007 22277 22311 22554 22259 22555 22232 22520 22089 22567 22041 22053 21992 22407 22123 22633 22225 22622 22236 22592 22260 22615 22167 22583 22013 22546 21988 22397 22032 22414 22004 22410 22000 22404 22086 22448 22099 22519 22077 22547 22257 22601 22194 22626 22237 22661 22206 22638 21989 22613 22016 22531 21916 22390 21813 22449 21734 22427 21704 22481 21844 22455 21995 22457 21918 22472 19523 20212 19743 20467 20148 20763 20401 20916 20358 23620 22833 23393 22465 23177 22423 23091 22231 22891 22188 22905 22331 22839 22185 22666 21935 22565 22321 22603 22129 22531 21905 22631 21937 22558 21911 22617 22081 22752 22056 22747 22033 22626 21815 22513 22030 22005 21915 22546 21969 22512 21969 22550 21918 22551 22011 22476 22151 22545 22119 22416 22128 22560 21992 22528 21977 22573 22025 22479 22098 22504 21945 22406 21973 23058 22231 22485 21909 22436 22036 22694 22196 22588 22353 22595 22238 22501 22345 22347 22154 22453 22036 22349 22345 22634 22465 22715 22217 22513 22117 22397 22086 22199 22425 22859 22355 22359 22011 22266 21950 22644 22644 22397 22167 22361 22112 22305 22583 22707 22084 22171 22135 22327 22584 22447 22179 22282 22217 22617 22588 22300 22637 22128 22349 22403 22644 22268 22920 22144 22696 22385 22537 22227 22233 22403 22625 22231 22368 22320 22567 22577 22395 22141 22630 22455 22376 22100 22620 22328 22619 22059 22511 22318 22672 22153 22448 22293 22549 22039 22729 22303 22496 21882 22730 22417 22380 22202 22896 22103 22441 22308 22723 21909 22698 22390 22623 22114 22754 22056 22405 22248 22721 20666 21637 21034 21447 21079 21830 20825 21849 21324 21769 22400 23201 22200 22962 22436 22759 22296 22913 22150 22721 22327 22644 22243 22840 22281 22728 22261 22455 22193 22825 21933 22925 21971 22602 22113 22690 22177 22855 21985 22786 22024 22693 22165 22623 21991 22738 22072 22562 22205 22576 22149 22707 22028 22662 21847 22727 21891 22642 22206 22515 22123 22729 22039 22826 21990 22832 21991 22609 22244 22546 22177 22564 22072 22640 22092 22742 22124 22596 22121 22531 22195 22555 22273 22533 22176 22592 22035 22600 22101 22694 22022 22702 22119 22519 22112 22554 22144 23155 22120 22561 22212 22508 22051 22511 21946 22507 22016 22643 22240 22889 22115 22885 22232 22617 22297 22263 22260 22234 22280 22247 22333 22323 22226 22522 22402 22365 22558 22308 22641 22400 22628 22277 22548 22336 22632 22368 22658 22475 22498 22390 22450 22609 22361 22341 22240 22191 22279 22233 22221 22260 22243 22560 22199 22599 22261 22581 22595 22304 22632 22414 22575 22394 22320 22454 22574 22229 22480 22396 22492 22240 22507 22343 22560 22488 22586 22148 22663 22237 22647 22309 22496 22500 22333 22490 22378 22419 22631 22257 22725 22144 22852 22034 22938 22030 22642 22305 22599 22359 23095 22429 22488 22362 22528 22313 22765 22042 22817 22045 22859 22171 22515 22333 22724 22365 22512 22215 22792 22144 22873 21883 22912 22167 22613 22400 22528 22343 22688 22066 22972 21836 22924 22130 22789 22312 22435 22224 22775 22058 22917 22056 22878 22343 22516 22381 22519 22218 22912 22010 22853 22098 22724 22297 22610 21884 23031 22000 22631 22064 22836 22101 22829 21856 22767 22004 22637 22119 22710 22255 22697 22140 22770 22054 22804 22192 22740 22005 22872 21897 22745 21989 22695 22128 22645 21997 22717 22048 22658 22072 22621 22223 22641 22081 22752 22181 22727 22174 22645 22208 22572 22283 22482 22126 22577 22184 22701 22076 22697 22221 22630 22272 22521 22116 22696 22178 22778 22108 22781 22185 22558 22272 22697 22279 22560 22080 22791 22199 22528 22413 22368 22165 22647 22167 22370 22468 22578 22354 22507 22393 22700 22256 22226 22003 22673 22644 22555 22251 22441 22470 22371 22575 22784 22189 22430 22250 22312 22633 22806 22135 22215 22130 22575 22519 22599 22229 22442 22122 22810 22644 22727 22736 22183 22679 22429 22788 22241 22560 22367 22799 22113 22400 22519 22707 22297 22141 22429 22627 22353 22464 22528 22628 22297 22686 22567 22528 22092 22769 22336 22541 22246 22934 22202 22653 22478 22472 22217 22742 22229 22618 22375 22747 15872 17175 16813 17449 17532 17891 17491 18375 17803 18309 24249 24387 23700 24138 23265 23764 23244 23561 22948 23629 22520 23594 22632 23226 22787 23003 22632 18341 17803 18987 18534 19338 18737 19308 19142 19815 24033 24618 23698 24313 22816 24036 23028 23732 22908 23317 22872 23304 22807 23300 22606 23157 22656 23257 18959 19772 19369 19968 19596 20128 19920 20418 19990 24227 23517 24009 23177 23651 22857 23483 22742 23563 22756 23338 22628 23264 22685 23168 22643 23072 20120 20502 20253 20728 20567 20973 20654 21068 20800 20724 23378 23634 23178 23289 22935 23149 22855 23061 22816 23072 22791 23040 22633 22883 22796 22961 22744 21504 21559 21699 21878 21760 21925 21745 22031 21832 22051 23063 23236 23156 22941 22848 22797 22712 22535 22752 22752 22871 22487 23073 22563 23157 22434 23213 22540 23031 22597 22829 22386 22672 22763 22546 23060 22683 22883 22359 23051 22172 22991 22465 22903 22509 22801 22711 22600 22746 22483 22635 22660 22518 22924 22480 22976 22301 22956 22368 22867 22483 22698 22557 22707 22578 22694 22572 22923 22382 22921 22845 22965 22146 23058 22391 22837 22592 22569 22593 22832 22350 22909 22309 23029 22092 23067 22372 22744 22513 22704 22442 23007 22149 23136 21958 23174 22289 22800 22489 22714 22459 22843 22190 22928 22144 22989 22405 22667 22453 22919 22215 23061 22198 22833 22304 22817 22246 22850 22234 22875 22262 22622 22464 22794 22114 22938 21984 22790 22327 22736 22185 22978 22233 22801 22223 22766 22215 22897 22162 22696 22347 22759 22320 22872 22154 22704 22313 22657 22221 22750 22284 22672 22332 22565 22364 22820 22316 22727 22423 22581 22235 22770 22083 22606 22450 22666 22305 22726 22341 22620 22367 22877 22327 22631 22679 22324 22355 22823 22253 22339 22370 22939 22293 22641 22688 22681 22184 22455 22680 22711 22313 22822 22411 22427 22373 22912 22391 22460 22805 22614 22508 22666 22640 22202 22628 22528 22688 22130 22795 22568 22515 22835 22624 22615 22439 22315 22726 22528 22543 22284 22840 22464 22490 22217 22994 22528 22660 22198 22829 22569 22647 22282 22863 22485 22647 22247 22973 22439 22725 21600 22912 22487 22743 22060 22859 22438 22879 21974 22793 22304 23045 22088 22817 22324 22967 22251 22649 22241 23032 22374 22490 22129 23088 22416 22680 22128 22996 22408 22893 22082 22912 22127 22893 22280 22650 22098 22770 22355 22838 22135 22612 22275 22908 22096 22656 22043 22907 22176 22786 22148 22924 22176 22680 22103 22645 22204 22560 22137 22616 22358 22713 22203 22661 22306 22811 22252 22626 22113 22777 22387 22807 22196 22730 22392 22528 22223 22628 22372 22577 22231 22745 22565 22407 22230 22559 22584 22403 22289 22770 22097 22514 22528 22407 22137 22589 22477 22450 22376 22628 22185 22794 22128 22538 22632 22321 22709 22446 22432 22588 22104 22940 22292 22824 22787 22628 22400 22560 22367 22511 22815 22528 22692 22481 22794 22179 22721 22528 22427 22460 22852 22191 22765 22609 22768 22256 22892 22512 22965 22150 22951 22564 22715 22201 22875 22448 22784 22128 22675 22441 22897 22317 22589 22361 23005 22471 23111 22128 22924 22447 16807 16632 17897 17463 18112 17633 18648 17991 18425 24320 24939 23975 24266 23777 23932 18397 19242 18609 19477 19136 19574 19301 19945 19305 24805 24171 24749 23781 24086 23504 20163 19841 20298 19823 20661 19855 20992 20148 21030 20279 24535 23645 24144 23361 23816 20932 21216 20919 21344 21136 21479 21212 21517 21211 21572 23642 24004 23348 23665 22981 23475 21703 22244 21692 22195 21675 22348 21561 22281 21657 23318 22936 23341 22747 23232 22885 23017 22954 23065 23008 22949 23042 22772 23188 23307 22905 22833 22667 22860 22646 23136 22503 23253 22589 22996 22353 22675 22723 22664 22937 22613 22974 22371 23081 22588 22866 22648 22807 22647 22759 22634 23031 22615 23058 22443 22932 22725 22772 22744 22726 22435 23001 22288 23067 22503 22764 22679 22680 22516 23136 22288 22920 22629 22695 22509 23070 22194 23077 22583 22669 22498 23048 22112 22998 22518 22838 22259 23072 22184 22917 22467 22951 22016 23083 22484 22631 22312 23036 22361 22844 22436 23025 22181 22962 22479 22964 22195 22898 22155 23017 22294 22933 22403 22889 22284 22688 22387 22727 22153 22741 22332 22819 22121 22818 22325 
