# Supplementary material for: An Active Feature Selection Strategy for DWT in Artificial Taste
Source: Hindawi journal article supplement (doi:10.1155/2018/9709505), 2018-01-01
Supplement: f1 [file 9709505.f1.zip › spirit-med-2.txt]

36156 32449 31555 30179 17616 19612 21213 21397 22333 22119 22816 22392 22999 22665 23180 22902 23364 22917 23399 23214 23364 22952 23312 23079 23338 23061 23190 23112 23335 22946 23126 23119 23380 23160 23513 23479 23552 23567 23720 23373 23472 23157 23224 22948 23144 23095 23005 23328 23174 23536 23205 23673 23231 23645 23338 23572 23312 23468 23156 23352 23110 23368 22984 23165 22897 22814 23054 23504 23019 23560 23234 23548 23144 23755 23204 23652 23218 23672 22944 23651 22982 23457 22835 23344 22870 23490 22888 23465 22961 23712 23082 23762 23088 23828 23045 23720 22880 23563 22776 23197 23046 23544 22895 23641 23049 23788 22998 23904 22948 23814 22893 23648 22930 23418 22836 23292 22944 23365 22919 23575 22900 23544 22903 23712 22964 23625 23008 23545 22770 23494 22944 23385 22844 23510 22976 23456 22898 23482 23075 23603 23112 23573 23032 23392 22852 23499 22935 23415 22921 23369 22996 23466 23072 23410 23096 23594 23293 23501 23211 23377 23016 23268 22865 23130 22972 23431 23070 23252 23043 23296 23024 23228 23008 23233 23058 23362 23387 23616 23534 23698 23489 23656 23388 23527 18269 20072 20243 20747 21229 21084 21594 21164 21689 21192 26262 24941 24783 24006 23896 23712 23829 23471 23638 23352 23698 23296 23552 23059 23648 23221 23616 23106 23627 23096 23620 23168 23689 23204 23733 23244 23735 23208 23778 23136 23799 23249 23760 23063 23777 23230 23791 23086 23789 23045 23767 23044 23762 22908 23608 23001 23564 22974 23552 22920 23407 22798 23436 22737 23415 22682 23461 22864 23573 22851 23682 23360 23555 22876 23597 22823 23510 22906 23558 22806 23514 22727 23514 22791 23577 22701 23439 22796 23528 22887 23389 22888 23493 22936 23517 22887 23434 22998 23465 22979 23377 22957 23406 22920 23332 22957 23392 22918 23380 22974 23424 22887 23376 22909 23392 22966 23338 23110 23403 23047 23344 22956 23320 22977 23296 22991 23247 22976 23388 23223 23401 22951 23094 22867 23180 23117 23367 23415 23669 23403 23668 23456 23542 23537 23472 23079 23334 23068 23112 23621 23380 23459 23128 23319 22823 23291 22838 23281 23093 23384 23184 23405 23200 23500 23368 23539 23287 23552 23143 23495 23098 23467 22760 23360 22860 23472 23005 23479 23209 23600 23212 23629 23068 23721 23114 23720 23002 23624 22952 23466 22848 23330 19574 21197 21034 22007 21616 22570 21959 22633 22064 26968 24785 24745 23569 24111 23190 23798 23059 23872 23182 23899 23368 23797 23184 23818 23004 23752 22856 23645 22656 23658 22802 23728 23095 23680 22973 23607 22880 23575 22821 23449 23005 23493 22850 23655 22967 23750 22795 23648 22714 23559 22729 23557 22688 23505 22816 23484 23083 23618 22944 23392 22923 23485 22960 23532 22893 23528 23053 23577 23046 23497 22988 23337 22935 23426 23052 23368 22972 23467 23040 23476 22976 23392 22886 23454 22958 23266 23187 23598 23210 23220 22949 23300 22828 23132 23052 23555 23431 23438 23057 23230 22962 23159 23037 23336 23431 23540 23091 23175 22960 23188 22900 23392 23357 23618 23116 23267 23024 23128 22898 23360 23520 23563 23099 23288 23065 23592 22891 23398 23511 23362 23713 23312 23289 22914 23322 23133 23591 23256 23618 22930 23426 23025 23400 23400 23495 23209 23291 22938 23376 23132 23552 23325 23437 23450 23187 23083 23587 23137 23680 23005 23384 22925 23543 23170 23579 23114 23489 22906 23600 23188 23684 23042 23436 22790 23501 23095 23654 23130 23604 22937 23584 22681 23520 23063 23623 23122 23707 22980 23639 22897 23501 19852 21459 21412 22537 22016 22793 22248 23005 22347 23120 24515 24619 23449 24016 23254 23631 22977 23723 23018 23764 23158 23785 23090 23746 23172 23740 23097 23648 22936 23765 22800 23363 22699 23500 22842 23585 22816 23742 22945 23668 22996 23628 22875 23645 22924 23632 22870 23542 22976 23625 23035 23478 23046 23458 23033 23648 22945 23684 22816 23717 22933 23696 22689 23574 22673 23467 22769 23688 22870 23596 22802 23515 22722 23460 22876 23496 22914 23464 23125 23521 22976 23445 22873 23456 22902 23424 22912 23474 23086 23420 22947 23374 22908 23473 22988 23405 22973 23520 22839 23533 22967 23358 22906 23549 23008 23408 22865 23299 22870 23397 23093 23556 22960 23256 23079 23312 22984 23446 23168 23565 23207 23176 22744 23420 22954 23255 23028 23266 23177 23660 23247 23319 22755 23362 22970 23236 23093 23445 23343 23400 22976 23162 22956 23286 23027 23654 23136 23137 22935 23304 23001 23511 23316 23192 23061 23106 23100 23520 23353 23316 23253 23118 22960 23368 23463 23482 22912 23445 22983 23159 23216 23600 23365 23149 23106 23125 22925 23209 23500 23525 23196 22932 23643 23200 23556 23168 23474 23124 23256 22796 23717 23020 22251 22046 22848 22522 22725 22157 22754 22609 22958 24701 24312 23671 23853 23360 23392 23155 23242 23143 23431 23159 23544 23293 23532 23269 23582 23182 23424 23008 23272 22773 23533 22924 23653 23146 23644 23111 23657 23150 23652 23163 23372 23080 23256 22807 23356 22368 23528 23020 23460 23220 23573 23152 23628 23209 23658 23065 23589 23031 23507 22845 23328 22713 23387 22877 23559 22932 23492 22983 23517 23010 23738 23041 23665 23144 23744 23034 23778 23001 23627 22946 23586 22847 23459 22774 23575 22820 23593 22760 23556 22886 23541 22873 23694 22985 23700 23033 23749 23040 23751 23108 23752 23142 23719 22996 23688 23114 23758 23040 23661 23040 23557 22934 23711 22865 23717 22921 23702 22889 23682 22939 23650 22948 23726 22789 23516 22871 23511 22848 23453 22958 23482 22866 23431 23040 23537 22831 23552 22734 23562 22747 23478 22857 23530 22937 23531 22900 23536 22940 23685 22813 23666 22974 23589 22896 23570 23000 23524 22976 23648 23015 23570 22912 23500 22902 23479 22944 23408 22916 23450 22913 23440 22881 23342 22801 23404 22860 23368 23020 23556 23013 23393 22774 23324 22873 23428 23008 23410 23122 23472 23098 23495 22150 22901 22610 23061 22676 23062 22720 23040 22746 23025 23366 23547 23233 23190 22961 23348 23152 23447 23292 23676 23274 23381 23022 23424 23041 23271 22993 23264 22903 23272 22951 23109 22936 23457 23412 23723 23495 23505 23186 23196 23017 23191 22952 23084 22989 23645 23104 22945 23021 23488 23343 23611 23378 23292 23127 23142 23052 23168 22956 23184 23076 23069 22973 23304 23496 23539 23408 23322 23216 23464 23525 23095 23276 22851 23234 22871 23343 23096 23584 23217 23571 23276 23502 23114 23271 22948 23098 23062 23280 23252 23506 23230 23489 23116 23506 22883 23767 22873 23276 23040 23488 23240 23564 23241 23585 23032 23415 22940 23239 22951 23533 23066 23680 23109 23545 23224 23452 22857 23329 22914 23421 23009 23588 23149 23651 23061 23452 22919 23282 22818 23449 23119 23632 23117 23537 22907 23383 22856 23400 22960 23605 23108 23704 23017 23650 22880 23520 22646 23563 22855 23696 23040 23770 23024 23636 22876 23503 22720 23556 22862 23730 22940 23721 22998 23687 22727 23430 22754 23482 22938 23713 23101 23721 23005 23616 22863 23539 22704 23356 22792 23562 22912 23633 23104 23684 22920 23639 22947 23693 22784 23613 22766 23607 22713 23394 22746 23456 22823 23513 22919 23683 22918 23452 22764 23380 22972 23514 22845 23475 22973 23443 22865 23382 22922 23524 22763 23492 22739 23464 22848 23383 22790 23711 22771 23584 22809 23471 22654 23496 22832 23560 22710 23592 22756 23347 22905 23415 22737 23518 22869 23333 23017 23364 22823 23518 22948 23437 22921 23412 22884 23377 22916 23479 22912 23322 23010 23408 22919 23373 22794 23525 23010 23310 22967 23303 22874 23472 22957 23401 22873 23320 22932 23452 23030 23322 22985 23282 22836 23508 23148 23505 22795 23354 22967 23456 23024 23224 22792 23432 23192 23368 22790 23200 23109 23554 22966 23250 23089 23239 23204 23408 22973 23205 22959 23552 23328 23309 22936 23016 23330 23490 22985 23084 23076 23330 23404 23252 22893 23222 22976 23623 23186 23096 23438 23020 23417 23360 22857 23357 22960 23630 22992 23124 22874 23552 22929 23067 22871 23639 23031 23056 22968 23614 22958 23136 22989 23523 22976 23044 23216 23309 23483 22915 23428 23081 23378 23098 23436 22888 23538 22832 23474 23106 23216 23156 23346 23041 23459 23011 23424 23201 23205 23168 23149 23248 23285 23112 23448 23004 23498 22891 23449 22976 23541 22964 23465 23008 23468 23040 23494 22983 23453 22977 23435 23005 23472 22985 23530 22872 23573 22858 23633 23461 23548 22292 23667 22905 23521 22759 23616 18682 20608 20515 21393 21165 21536 21460 21815 21592 28182 25580 25272 23936 24448 23385 24193 23251 23795 23328 23732 23189 23688 23053 23818 22856 23836 22999 20540 20888 21785 21561 22513 21512 22733 21884 22610 26344 25374 24084 24563 23288 24026 23387 23751 23256 23722 23000 23876 23128 23399 23104 23665 23000 20035 21002 21818 21870 22714 21896 22942 22265 22976 22053 25911 23980 24260 23332 23994 23072 23748 23137 23541 23030 23722 22807 23545 22993 23633 23090 23564 20967 22129 21908 22746 22273 23020 22218 23233 22321 23123 23985 24294 23329 23813 23059 23734 22967 23552 22950 23596 22775 23531 23024 23434 22789 23489 22977 22427 22400 23015 22700 22967 22620 23130 22745 23136 22642 23856 23319 23572 23019 23489 23164 23524 23408 23372 22944 23557 22992 23434 22985 23517 22784 23296 22965 23485 23088 23372 22961 23425 23046 23313 22854 23450 23074 23420 22967 23303 22981 23604 22850 23170 23042 23544 23159 23056 22909 23302 23232 23275 22984 23312 22950 23540 23028 23111 22955 23296 23457 23083 22823 23269 23109 23586 22968 23524 22952 23327 23514 23329 23151 23162 22999 23534 23216 23076 22896 23217 23388 23406 22960 23028 23024 23413 23363 23144 23186 23068 23045 23605 23328 23107 22966 23136 23389 23477 22936 23184 23510 23248 23360 23046 23106 22995 23564 23173 23382 22817 23530 22938 23570 23222 23399 22928 23256 23019 23543 23164 23452 23034 23272 23211 23473 23204 23317 22902 23336 23159 23460 23209 23413 22970 23296 23004 23576 23157 23465 22837 23437 22912 23589 23228 23439 22897 23400 22854 23671 23094 23609 22981 23382 22680 23442 23129 23579 23008 23448 22748 23427 23028 23709 22984 23563 22832 23468 22888 23652 23017 23735 22829 23401 22816 23445 22961 23652 23044 23655 22775 23296 22827 23572 22945 23800 22934 23552 22734 23910 22883 23680 22969 23645 22857 23409 22898 23482 22978 23680 22999 23697 22822 23373 22691 23411 23028 23689 22816 23685 22756 23627 22633 23580 22704 23485 23018 23544 22709 23508 22764 23402 22928 23559 22885 23360 22851 23352 22870 23646 22662 23494 22785 23424 22857 23520 22712 23542 22806 23533 22796 23452 22942 23426 22777 23457 23005 23399 22689 23509 22908 23557 22880 23515 22918 23374 22926 23472 22817 23489 22912 23331 23000 23324 22930 23333 22855 23465 22806 23340 23058 23386 23017 23452 22936 23467 22968 23328 22990 23179 22949 23441 22823 23429 22851 23408 22777 23324 23066 23320 23242 23362 23056 23047 22950 23228 22950 23108 23018 23162 23008 23021 23001 23247 23162 23281 23238 23260 22762 23377 22947 23468 22882 23057 23397 23232 22830 23601 22898 23428 23435 23120 22857 23208 23388 23053 22880 23591 22941 23195 22898 23604 22961 23016 22969 23468 23180 23175 23177 23085 23318 23175 22877 23080 23208 23345 23557 22894 23474 23114 23444 22726 23445 23100 23378 22817 23634 23169 23211 23072 23484 23019 23245 23296 23420 22726 23472 23175 23105 23117 23525 22994 23414 23290 23172 23044 23550 22896 23503 22971 23279 23040 23415 22920 23520 22838 23699 22932 23317 23211 23212 23108 23296 23029 23621 22688 23538 22978 17911 19428 20916 20784 21445 21317 21804 21408 21802 21634 26946 25237 24886 23946 24085 23495 20823 21068 22144 21719 22553 21861 22647 22070 22786 26314 25549 24033 24474 23404 24185 20493 22180 21754 22727 22189 22951 22254 23011 22370 23013 24683 24524 23699 24017 23461 21680 21979 22588 22450 22791 22530 23143 22560 23300 22502 25021 23382 24253 23084 23978 23017 23163 22534 23248 22688 23313 22511 23431 22599 23445 23664 23968 22980 23760 23031 23596 23013 23521 22964 23528 22945 23561 22924 23549 22698 23528 22962 23434 22873 23665 22785 23558 22759 23703 22598 23464 22948 23425 22886 23412 22802 23585 22723 23544 22871 23458 22919 23404 22950 23288 22951 23414 22794 23330 22877 23400 22968 23357 22896 23540 22870 23431 22947 23306 22897 23436 22837 23495 22838 23372 23000 23217 22922 23533 22832 23397 22926 23245 22897 23446 23008 23380 23060 23381 22938 23485 22752 23360 23143 23287 22968 23465 22754 23204 23302 23085 22986 23224 23213 23289 23104 23504 22854 23152 23154 23201 23016 23137 23462 23134 22818 23511 23110 23162 22992 23652 22904 23069 22933 23605 22791 23252 23317 23385 
22167 21623 22063 21318 22295 21115 22147 21431 22125 21578 21964 21276 22128 21391 22232 21415 22003 21504 22080 21512 22174 21385 22208 21293 22035 21429 21895 21374 22161 21329 22093 21464 21782 21602 21920 21463 22208 21170 21960 22594 21901 22665 21809 22567 21726 22410 21838 22548 21929 22453 21765 22560 21801 22565 21938 22592 21975 22595 21806 22634 21881 22435 21840 22313 21911 22023 21945 22401 21842 22440 22038 22455 21952 22513 21976 22480 22033 22351 22063 22601 21835 22391 21699 22064 21853 22311 21824 22172 21953 22260 21972 22281 22140 22577 22285 22434 22288 22284 21866 22085 21764 22018 21766 22144 21904 22272 22288 22587 22480 22417 22321 22245 21881 21909 21960 21252 22331 21920 22452 22055 22633 22064 22528 22076 22425 22108 22196 21831 22037 21785 22328 21879 22307 22095 22465 22135 22567 22106 22547 22028 22343 21937 22148 21637 22050 21988 22299 21921 22445 22071 22492 22112 22574 22068 22583 22010 22485 21760 22401 21717 22338 21587 22222 21575 22439 21783 22403 21728 22404 21893 22418 22048 22486 22045 22597 21874 22694 21890 22777 21722 22639 21740 22569 21880 14396 14949 16099 15856 16441 16144 16852 16207 16890 16396 25127 23698 24077 23094 23856 23024 23140 22358 22835 22231 22656 22121 22621 22150 22611 22052 22453 22042 22439 21881 22327 21882 22273 21989 22456 21976 22509 21888 22340 21963 22330 22076 22444 22349 22771 22340 22576 22356 22663 22358 22469 22423 22614 22229 22375 22315 22385 22161 22312 22021 22201 21842 21923 21736 21848 21818 22181 22077 22030 21881 22039 21830 22007 21914 22067 22503 22008 22331 21915 22488 21856 22457 21884 22418 22120 22278 22072 22272 22132 22483 22214 22312 22029 22371 22016 22466 21920 22364 22054 22496 21938 22396 21955 22360 21944 22375 21869 22370 21885 22417 21904 22448 21872 22488 21808 22409 21820 22468 21781 22445 21771 22369 21755 22384 21664 22432 21602 22840 21889 22123 21744 22185 21508 22140 21453 22264 21709 22378 21730 22522 21768 22596 21744 22458 21774 22368 21687 22439 21600 22227 21672 22238 21581 22340 21477 22432 21351 22488 21741 22319 21740 22448 21688 22479 21829 22150 21627 22174 21739 22123 21706 22236 21609 22170 21732 22266 21910 22272 21856 22300 21833 22200 21851 22104 21699 22176 21612 22048 21654 22114 21750 14979 15988 17209 17111 17921 18000 18338 18137 18393 17969 24832 23872 23499 22889 22956 22322 22493 22324 22658 22652 22913 22471 22407 22076 22113 21847 22061 21815 22044 21696 21928 21902 22371 22352 22596 22173 22215 21976 22272 22551 22010 22329 21633 22091 21718 22387 22028 22575 22087 22361 21975 22178 21447 21975 21718 22068 21938 22310 22144 22415 22135 22400 21967 22177 21751 22035 21719 22359 21953 22434 22092 22535 21990 22343 21738 22084 21527 22248 21849 22528 22036 22468 21946 22296 21741 22171 21590 22244 21905 22569 21925 22521 21715 22167 21526 22309 21826 22614 21841 22639 21664 22344 21479 22121 21605 22384 21991 22414 22003 22238 21079 22121 21593 22353 21908 22576 21664 22433 21655 22169 21608 22491 21678 22357 21518 22120 21841 22192 21669 22333 21767 22179 21653 22266 21649 22346 21651 22325 21581 22305 21516 22321 21674 22387 21741 22306 21582 22117 21459 22304 21678 22321 21600 22133 21733 22250 21844 22318 21734 22131 21735 22134 21738 22264 21691 22227 21616 21948 21677 22266 21661 22098 21643 22055 21725 22272 21840 22224 21685 22136 21537 22091 21477 22250 21757 22176 21769 22178 21683 21923 21643 22391 17090 18104 18377 19162 19117 19556 19085 19264 19095 19395 23665 23367 22746 23143 22334 22340 22057 22563 22454 22757 22474 22577 22082 22001 21969 22008 21856 22026 22300 22185 21691 21874 21785 21936 21907 21975 22016 22306 22113 22138 21977 22215 21929 22039 21975 22077 21856 22110 21988 21669 21793 21831 22183 21719 22125 21696 22240 21640 22008 21751 22094 21644 21947 21671 21764 21623 21832 21940 22046 21847 21954 21879 22209 22062 22372 22048 22293 22098 22288 21856 22141 21718 21952 21659 22153 21830 22388 21902 22391 21676 22076 21603 22149 21767 22468 21922 22342 21750 21929 21728 22179 21957 22380 21825 22032 21559 22465 21690 22437 21862 22336 21658 22128 21456 21432 21699 22436 21878 22528 21728 22240 21495 22072 21497 22187 21741 22502 21805 22419 21676 22321 21392 22107 21492 22240 21716 22567 21801 22440 21524 22087 21570 22294 21836 22427 21812 22125 21470 22103 21765 22544 21753 22248 21415 22160 21734 22377 21868 22252 21504 22062 21736 22537 21820 22352 21698 22095 21437 22248 21512 22311 21691 22391 21465 22053 21474 22156 21613 22341 21661 22167 21403 22139 21505 22083 21639 22223 21776 22189 21493 22633 17968 19534 19080 20301 19685 20544 19763 20399 19797 20468 23084 23228 22413 22779 22007 22604 21719 22376 21447 22263 21606 22243 21685 22149 21786 22295 21760 22347 21684 22065 21464 22180 21607 22109 21656 22151 21561 22218 21771 22272 21799 22197 21817 21969 21608 22243 22005 22063 21589 22061 21687 22170 21585 22052 21861 22242 21688 22248 21881 22161 21646 22115 21383 22177 21663 22007 21656 21975 21560 21862 21543 21825 21835 22158 21867 22417 22001 22325 22057 22086 22045 22051 21748 21791 21476 21719 21904 21999 21771 21889 21596 21810 21531 21818 21528 21795 21706 21938 21675 21888 21817 21938 21933 22159 22049 22140 22220 22391 22294 22395 22237 22411 22230 22163 22029 22301 22119 22102 21984 22327 21984 22064 22047 22068 21883 21856 21628 21832 21669 21816 21658 21269 21702 21575 21861 21584 21995 21474 21893 21637 21919 21320 21961 21508 21928 21816 21956 21719 22002 21789 22041 21777 22049 21736 22037 21796 22073 21878 22244 21965 22147 22025 22113 22178 22168 22007 22241 21920 22352 21824 22433 21767 22201 21833 22168 21640 22135 21696 21799 21764 21938 21382 21865 21397 21818 21541 22076 21493 22145 21608 22196 21852 20704 20621 21402 20882 21488 21044 21557 20999 21562 22541 22794 22047 22356 21600 22161 21537 22178 21657 22375 21778 22489 21779 22519 21696 22423 21592 22176 21475 22203 21426 21949 21365 22069 21605 22145 21672 22344 21778 22376 21840 22313 21719 22193 21593 22154 21417 22028 21302 22121 21435 22287 21632 22384 21595 22381 21436 22179 21353 22152 21824 22050 21457 22004 21639 22296 21552 22266 21664 22081 21377 22169 21655 22244 21530 22103 21600 22091 21633 22359 21423 22101 21529 22065 21378 22202 21418 22114 21521 22169 21637 22275 21405 22119 21553 21985 21419 22167 21412 22129 21632 22244 21597 22149 21549 22011 21504 21976 21632 21891 21712 22066 21779 22034 21613 21992 21480 21889 20941 22043 21477 22083 21673 22235 21542 22075 21483 22062 20858 22007 21504 22088 21764 22158 21617 21870 21455 22250 21441 22087 21549 22304 21854 22037 21768 21799 21586 21968 21528 21909 21799 22279 21879 22061 21760 21851 21617 21905 21460 22089 22017 22185 21718 21819 21707 21842 21597 21866 21456 21950 22067 22282 21888 21846 21481 21808 21553 21802 21536 21604 21477 22064 22068 22247 22007 21882 21702 21830 21528 21760 21433 21696 21633 21638 21583 21677 21532 21633 21673 21894 22115 22144 21643 21740 21575 21895 22004 21353 22199 22016 21968 21477 22080 21796 21989 21396 22237 21469 22405 21930 22055 21475 22097 21593 22181 21809 21837 21799 22004 21969 21889 21888 22022 21540 22124 21096 21943 21907 21741 21826 22277 21352 21888 21932 21881 21440 22320 21803 21765 21714 22190 21595 21972 21801 22312 21400 21838 21687 22257 21893 21917 21355 21977 21816 22259 21833 21980 21444 21976 21731 22214 21756 21991 21251 22131 21782 22308 21587 22061 21368 22139 21723 22400 21510 21827 21605 22374 21732 21976 21280 22211 21747 22233 21437 21920 21523 22304 21719 22134 21335 21995 21664 22348 21620 22119 21206 22341 21559 22343 21757 21999 21607 22387 21642 22012 21399 22041 21720 22297 21590 21986 21411 22330 21772 22210 21184 21904 21646 22324 21427 22024 21556 22383 21660 22096 21481 22301 21229 22190 21356 22272 21387 22071 21499 22256 21495 22025 21504 21986 21472 22177 21538 21955 21403 22106 21480 21991 21685 22016 21319 22305 21463 22164 21334 22107 21579 21952 21222 22295 21341 22020 21347 22069 21463 22017 21528 21964 21564 22080 21334 22116 21555 22243 21441 22196 21358 22165 21397 22112 21554 22089 21511 22029 21505 22032 21466 22045 21448 22141 21416 22080 21499 22152 21464 22033 21478 22102 21625 22009 21423 21993 14073 15653 15607 16445 16303 16863 16592 16901 16680 25746 24253 24290 23168 23416 22532 22848 22408 22509 22372 22471 22086 22119 21939 22537 21881 22148 14765 16200 17387 17374 17621 18263 17713 18332 18264 18326 24965 24171 23210 23705 22547 22658 22858 22273 22084 22708 22406 22093 22231 22249 21872 22301 21933 16896 18199 18693 18595 19304 18881 19150 19529 19341 19074 24613 23174 22854 23064 22404 22103 22443 22352 22055 21928 22561 21937 22225 22052 21734 22094 22022 18988 18926 19933 19847 20084 20342 20715 20105 20262 20247 23644 22562 22779 22457 22459 22028 22116 22123 22230 21624 22161 22144 22025 21839 22151 22071 21990 20266 20947 20753 21136 20608 21328 21137 21248 20816 23127 22439 22583 21680 22241 22089 22267 21515 22263 21897 22336 21623 21950 21811 22394 21681 21904 21580 22479 21784 21971 21395 22340 21780 22157 21335 22157 21728 22319 21496 22098 21717 22379 21671 21939 21627 22273 21764 22223 21481 22199 21740 22337 21331 22199 21604 22388 21645 21988 20757 22385 21719 22251 21195 22087 21632 22418 21513 21948 21447 22261 21722 22305 21404 22151 21578 22384 21748 22037 21492 22101 21736 22461 21479 22118 21465 22407 21527 22373 21383 22145 21453 22096 21596 22145 21545 22034 21594 22174 21508 22085 21383 22131 21614 21985 21652 22069 21357 22171 21455 22144 21461 22532 21299 22158 21578 22297 21404 22285 21285 22120 21524 22251 21379 21965 21467 22122 21487 22116 21424 21831 21357 22097 21504 22121 21614 21981 21453 22039 21520 22104 21466 22039 21506 21899 21694 22016 21521 21943 21410 22009 21465 22272 21544 21814 21931 21893 21487 22016 21668 22005 21416 21907 21497 21968 21749 22016 21485 21933 21570 21847 21627 22184 21849 21686 21475 21921 21575 21865 21948 22101 21459 21762 21510 21713 21701 22128 21999 21959 21431 21798 21411 21731 21812 22293 21920 21744 21518 21487 21402 21735 21895 22237 21861 21665 21636 21590 21515 21955 22020 22185 21556 21677 21565 21732 21673 22241 22096 22052 21403 21819 21475 21968 21909 21667 21817 21481 21824 21889 22214 21497 21849 21412 22098 21850 22115 21368 21799 21921 22022 21587 21865 21840 22084 21453 21895 21883 22026 21434 21959 21866 21691 21619 22006 21677 21888 21853 21931 21840 22256 21461 22072 21685 21987 21552 22173 21343 22048 21702 21968 21753 22032 21866 22196 21461 21994 21792 21877 21587 22316 21165 22250 21478 22102 21594 22113 21703 21831 21720 22016 21461 22281 21395 22193 21229 22267 21256 22233 21241 22329 21229 22242 21303 22336 21393 22236 21529 21981 21651 21847 21669 22137 21283 22319 21381 22027 21601 22098 21438 22346 21580 21885 21747 22220 21284 22216 21555 22058 21353 22337 21507 22149 21386 22220 21338 22364 21400 22286 21275 22129 21454 22125 21574 21943 21415 21982 21540 21977 21425 21959 21613 21936 21379 22074 21468 21997 21256 22137 21248 22071 21388 22090 21262 22023 21449 22061 21299 22154 21509 21835 21463 22153 21254 22119 21430 21897 21568 22035 21208 22171 21443 22052 21634 21827 21505 21905 21530 21959 21496 22008 21520 22253 21714 21882 21441 21976 21397 21937 21396 14004 14749 16169 15808 16728 16353 16875 16728 17069 16957 25084 24169 23676 23100 23095 22445 16850 17136 17967 17901 18353 17944 18533 18345 18541 24871 24265 23297 23421 22537 22744 17715 18701 18633 19201 19219 19479 19242 19643 19593 24692 24151 23200 23241 22657 22941 18981 19861 19833 20096 20047 20023 20311 20041 20894 20066 23864 22608 22960 22052 22359 20182 20668 20899 20827 21370 21036 21120 20886 20899 21351 22392 22913 22039 22462 21765 21922 21927 21825 22087 21641 22196 21809 22070 21792 21909 21802 22058 21645 22334 21587 22384 21363 22217 21767 21961 21988 21709 21978 21872 21808 22135 21648 22112 21835 22124 21990 21905 21687 22196 21392 22286 21644 22016 21817 21963 21697 22255 21333 22239 21589 21929 21933 21777 21677 22226 21464 22061 21847 21732 21794 22094 21641 22189 21646 22160 21657 22065 21430 22295 21483 22059 21713 22059 20842 22231 21632 22193 21772 22069 21457 22350 21691 21976 21641 22320 21201 22152 21678 22127 21387 22421 21525 22045 21495 22391 21325 22160 21690 22059 21277 22231 21626 21873 21555 22203 21614 21863 21571 22246 21584 21992 21664 22322 21238 
21525 21392 21633 21447 21927 21303 21603 21394 21572 21734 21719 21435 21838 21314 21705 21445 21788 21482 20868 21642 21495 21584 21600 21467 21611 21562 21538 21736 21597 21600 21656 21478 21613 21622 21472 21760 21600 21559 21607 21620 21493 21671 21435 21672 21667 21464 21640 21695 21383 21722 21590 21667 21559 21710 21440 21808 21573 21479 21479 21733 21380 21851 21509 21521 21543 21854 21312 21799 21524 21477 21506 21845 21232 21761 21519 21520 21754 21508 21731 21362 21748 21356 21560 21237 21648 21206 21665 21351 21715 21354 21837 21451 21875 21409 21845 21345 21794 21358 21612 21218 21838 21313 21671 21432 21925 21440 21799 21248 21856 21289 21840 21450 21712 21258 21636 21245 21669 21269 21677 21255 21844 21225 21748 21281 21810 21382 21810 21285 21785 21218 21862 21321 21637 21270 21689 21346 21735 21330 21736 21373 21767 21394 21721 21273 21661 21480 21668 21303 21715 21274 21773 21312 21723 21393 21703 21410 21785 21472 21835 21489 21671 21292 21553 21201 21657 21204 22080 21262 21456 21301 21533 21320 21672 21376 21636 21426 21701 21568 21812 21600 21892 21712 21829 21668 17175 17472 17626 17752 17719 17910 17804 18022 17957 23495 22624 22274 21766 21789 21516 21655 20962 21620 21477 21562 21441 21528 21352 21580 21432 21551 21339 21560 21452 21617 21384 21587 21445 21760 21522 21728 21504 21721 21466 21776 21393 21808 21398 21755 21431 21717 21449 21779 21378 21860 21355 21846 21331 21802 21408 21766 21346 21757 21324 21745 21273 21728 21207 21574 21192 21616 21152 21749 21189 21785 21133 21849 21536 21672 21305 21689 21266 21699 21170 21760 21131 21665 21127 21694 21225 21723 21184 21750 21214 21696 21269 21715 21287 21648 21263 21654 21248 21650 21251 21692 21195 21587 21195 21645 21251 21638 21206 21643 21179 21633 21248 21591 21211 21610 21189 21520 21236 21557 21260 21520 21294 21651 21293 21579 21348 21703 21463 21774 21217 21621 21204 21549 21261 21523 21418 21745 21597 21845 21681 21859 21639 21896 21521 21673 21337 21568 21346 21620 21389 21664 21595 21512 21494 21550 21486 21328 21505 21454 21573 21540 21564 21594 21603 21651 21685 21606 21664 21552 21654 21445 21492 21552 21601 21319 21620 21440 21672 21584 21719 21575 21703 21461 21800 21484 21767 21433 21715 21368 21672 21437 21607 17079 18404 18501 19095 18838 19352 18888 19411 19120 19492 22866 22625 21830 22209 21399 21731 21388 21831 21427 21767 21487 21785 21481 21910 21379 21863 21160 21438 21277 21821 21135 21890 21320 21796 21338 21728 21271 21751 21209 21716 21365 21704 21204 21872 21283 21811 21228 21810 21201 21837 21120 21748 21177 21699 21162 21849 21400 21767 21321 21707 21264 21728 21210 21624 21326 21676 21451 21792 21383 21735 21239 21678 21295 21636 20714 21654 21386 21797 21399 21829 21317 21733 21216 21641 21658 21648 21350 21838 21477 21713 21408 21595 21276 21572 21332 21843 21527 21681 21395 21651 21367 21581 21226 21534 21587 21808 21464 21582 21357 21530 21312 21538 21703 21862 21345 21604 21353 21462 21333 21560 21603 21926 21529 21649 21308 21450 21435 21651 21593 21783 21669 21728 21536 22044 21490 21457 21637 21512 21650 21477 21786 21376 21590 21569 21607 21652 21493 21509 21355 21579 21678 21635 21675 21440 21488 21526 21646 21638 21739 21521 21608 21305 21715 21493 21739 21605 21499 21339 21660 21484 21782 21517 21628 21294 21664 21466 21723 21578 21722 21449 21640 21266 21664 21431 21760 21578 21740 21530 21841 21336 21701 21253 19105 19232 19947 19640 20156 19897 20234 19960 20349 23108 22700 21794 22050 21357 21717 21312 21768 21422 21795 21408 21898 21333 21773 21487 21761 21381 21760 21268 21910 21400 21578 21261 21704 21239 21818 21381 21885 21383 21799 21417 21811 21382 21851 21324 21920 21393 21835 21388 21816 21368 21797 21552 21751 21505 21792 21320 21911 21317 21879 21279 21882 21296 21901 21184 21696 21147 21711 21366 21601 21219 21778 21223 21731 21302 21785 21280 21712 21376 21698 21454 21849 21397 21633 21378 21697 21344 21802 21319 21749 21416 21712 21376 21725 21276 21661 21366 21805 21427 21687 21132 21660 21436 21766 21367 21848 21237 21818 21356 21801 21245 21813 21371 21774 21296 22020 21193 21683 21363 21766 21536 21841 21269 21520 21544 21616 21312 21749 21394 21696 21575 21805 21406 21565 21406 21494 21380 21673 21452 21815 21544 21504 21370 21509 21338 21621 21656 21766 21370 21595 21259 21568 21668 21872 21216 21587 21388 21661 21544 21903 21421 21827 21250 21662 21504 21928 21610 21479 21367 21461 21380 21762 21680 21799 21335 21537 21305 21671 21337 21880 21728 21603 21398 21528 21601 21621 21594 21613 21688 21552 21424 21657 19685 20207 20619 20619 20599 20585 20648 20414 20692 20704 22615 22158 21939 21809 21703 21664 21462 21366 21352 21448 21610 21640 21701 21641 21693 21632 21633 21559 21653 21267 21537 21370 21697 21461 21745 21575 21816 21527 21733 21568 21671 21598 21531 21424 21447 21235 21644 21392 21640 21509 21688 21696 21765 21580 21696 21504 21796 21472 21763 21464 21660 21404 21549 21378 21691 21144 21788 21394 21687 21453 21769 21485 21845 21504 21778 21532 21853 21477 21814 21438 21829 21401 21746 21179 21592 21201 21863 21576 21865 21279 21696 21297 21733 21415 21834 21428 21896 21488 21926 21449 21864 21436 21836 21373 21872 21416 21866 21489 21837 21444 21829 21447 21872 21388 21892 21336 21899 21351 21911 21344 21851 21376 21898 21383 21944 21356 21846 21364 21771 21349 21751 21490 21792 21376 21845 21413 21942 21211 21794 21337 21844 21383 21799 21432 21821 21410 21842 21386 21845 21327 21944 21331 21941 21379 21806 21367 21847 21398 21821 21364 21775 21323 21773 21325 21728 21304 21728 21365 21810 21309 21765 21317 21723 21312 21665 21277 21753 20656 21824 21348 21688 21237 21748 21225 21799 21415 21844 21442 21791 21431 21746 21397 21015 20791 21301 20968 21369 21064 21419 21045 21225 22000 22168 21537 21671 21327 21749 21533 21854 21493 21861 21543 21729 21356 21674 21422 21746 21293 21597 21344 21545 21277 21509 21325 21816 21667 21895 21595 21840 21406 21530 21389 21666 21392 21552 21345 21620 21463 21547 21276 21752 21581 21948 21655 21733 21377 21611 21368 21632 21297 21561 21533 21495 21312 21656 21705 21881 21753 21777 21386 21733 21729 21571 21600 21585 21532 21398 21608 21511 21711 21601 21671 21639 21695 21554 21568 21431 21483 21484 21633 21576 21604 21683 21688 21639 21648 21487 21635 21392 21491 21545 21665 21611 21680 21638 21761 21528 21623 21536 21487 21424 21669 21539 21863 21514 21765 21654 21680 21398 21504 21317 21660 21484 21767 21560 21816 21541 21762 21417 21499 21294 21752 21526 21811 21479 21799 21433 21717 21386 21584 21448 21782 21506 21836 21557 21870 21351 21626 21433 21602 21430 21843 21473 21847 21504 21852 21341 21498 21181 21735 21449 21866 21429 21911 21523 21893 21305 21719 21268 21768 21420 21830 21479 21857 21524 21881 21388 21740 21338 21873 21314 21716 21412 21824 21459 21897 21447 21919 21420 21889 21216 21776 21296 21769 21289 21783 21257 21719 21333 21825 21365 21823 21385 21756 21319 21764 21342 21834 21271 21636 21319 21839 21377 21739 21353 21924 21302 21712 21387 21743 21268 21856 21198 21735 21159 21728 21385 21754 21298 21723 21338 21740 21415 21828 21276 21840 21304 21916 21333 21726 21371 21748 21271 21761 21339 21753 21255 21711 21352 22139 21514 21778 21239 21769 21447 21728 21300 21702 21466 21706 21328 21712 21515 21730 21483 21680 21365 21680 20614 21690 21389 21800 21369 21651 21424 21769 21444 21686 21409 21673 21203 21806 21467 21700 21285 21784 21421 21875 21364 21755 21409 21748 21522 21801 21303 21765 21431 21841 21388 21717 21301 21483 21531 21817 21345 21623 21224 21817 21532 21725 21298 21550 21592 21848 21381 21633 21328 21571 21651 21809 21382 21563 21284 21902 21559 21602 21348 21559 21627 21838 21418 21655 21477 21889 21379 21620 21266 21941 21324 21536 21393 21876 21399 21524 21382 21900 21338 21623 21485 21709 21308 21364 21537 21722 21594 21675 21677 21596 21706 21691 21559 21574 21729 21312 21692 21467 21624 21704 21505 21661 21623 21468 21752 21353 21717 21519 21675 21666 21483 21632 21624 21695 21517 21682 21594 21617 21650 21545 21772 21504 21826 21427 21793 21371 21836 21365 21821 21416 21767 21484 21816 21458 21720 21558 21611 21554 21713 21512 21685 21605 21841 21493 17572 17875 18288 18196 18521 18191 18616 18240 18759 23276 23040 22177 22071 21792 21809 21558 21752 21549 21828 21341 21808 21280 21851 21431 21712 21465 17500 18343 19200 18821 19557 19097 19537 19315 19622 19177 23428 22162 22338 21763 21869 21618 21860 21383 21870 21525 21773 21476 21708 21344 21818 21337 21770 18580 19716 19536 20279 19771 20131 19853 20385 19777 20439 22533 22339 21699 22080 21339 21776 21366 21901 21280 21749 21288 21673 21360 21723 21404 21719 21207 20121 19961 20617 20356 20955 20353 21005 20393 20908 22678 22521 21829 22333 21394 21949 21296 21747 21301 21879 21092 21739 21255 21802 21314 21729 21306 21752 20605 21102 20834 21319 20907 21248 20922 21481 20891 22333 21637 22009 21330 21703 21372 21761 21351 21720 21360 21792 21393 21722 21356 21720 21411 21645 21325 21624 21387 21685 21425 21754 21339 21809 21143 21600 21360 21788 21248 21279 21391 21732 21540 21668 21295 21648 21514 21753 21485 21670 21396 21803 21292 20946 21401 21669 21533 21605 21331 21741 21428 21880 21336 21540 21469 21735 21541 21511 21344 21699 21345 21914 21302 21462 21323 21546 21703 21721 21329 21530 21344 21877 21553 21527 21280 21613 21537 21927 21248 21578 21379 21675 21600 21656 21313 21561 21364 21825 21652 21431 21492 21696 21632 21549 21573 21529 21639 21644 21673 21509 21475 20761 21680 21646 21618 21616 21450 21328 21632 21576 21661 21559 21376 21531 21637 21608 21730 21596 21435 20928 21575 21659 21705 21573 21504 21607 21636 21552 21771 21472 21555 21213 21675 21608 21693 21562 21650 21488 21667 21562 21765 21625 21736 21221 21560 21419 21859 21521 21776 21396 21521 21412 21804 21457 21792 21495 21607 21399 21700 21541 21864 21460 21809 21303 21592 21334 21833 21516 21868 21344 21723 21208 21716 21372 21915 21445 21848 21418 21607 21347 21797 21553 21832 21527 21873 21280 21776 21408 21827 21480 21955 21392 21863 21228 21720 21360 21905 21331 21889 21392 21844 21175 21825 21248 21762 21354 21819 21398 21741 21361 21683 21376 21774 21335 21807 21440 21713 21354 21769 21344 21799 21357 21688 21264 21960 21066 21768 21299 21831 21241 21764 21301 21798 21211 21703 21289 21936 21120 21777 21345 21830 21287 21697 21452 21676 21283 21812 21307 21744 21430 21705 21381 21704 21368 21777 21264 21762 21364 21768 21335 21827 21330 21619 21393 21680 21395 21662 21353 21796 21671 21719 21248 21730 21401 21753 21350 21608 21335 21863 21332 21858 21297 21845 21352 21883 21455 21729 21252 21769 21479 21736 21441 21861 21323 21802 21393 21589 21379 21658 21623 21627 21229 21911 21291 21539 21463 21554 21322 21796 21373 21476 21646 21676 21362 21820 21474 21525 21242 21904 21330 21589 21303 21936 21385 21527 21329 21794 21498 21687 21288 21555 21652 21667 21319 21504 21355 21648 21589 21470 21653 21652 21597 21408 21756 21624 21610 21447 21702 21532 21440 21676 21698 21527 21653 21537 21618 21420 21712 21555 21488 21688 21613 21458 21681 21504 21540 21664 21511 21511 21796 21451 21719 21593 21490 21582 21685 21427 21736 21362 21799 21437 21712 21575 21591 21493 21608 21572 21698 16882 18121 17920 18479 18149 18692 18277 18797 18405 18841 22888 22730 21984 22183 21785 17649 18641 19157 19232 19336 19368 19480 19465 19603 19524 23384 22432 22184 21833 21812 21616 19353 19694 20053 20008 20359 20069 20426 20107 20508 23144 22709 21856 22128 21543 21959 19632 20608 20183 20947 20377 21067 20482 21063 20679 21029 22183 22159 21682 21784 21427 20736 20650 21333 20844 21445 20936 21479 20874 21400 21036 22199 21595 21798 21332 21703 21398 21828 21312 21896 21398 21723 21400 21645 21447 21811 21286 21665 21283 21802 21162 21897 21277 21779 21306 21654 21312 21644 21262 21851 21194 21832 21177 21808 21353 21763 21210 21870 21239 21807 21305 21698 21515 21678 21332 21724 21285 21792 21251 21791 21352 21745 21292 21688 21302 21782 21236 21729 21383 21559 21312 21793 21373 21696 21382 21671 21302 21791 21315 21749 21383 21665 21303 21810 21265 21755 21409 21689 21298 21761 21312 21672 21582 21648 21363 21856 21174 21684 21468 21664 21376 21639 21607 21596 21434 21802 21268 21639 21337 21862 21287 21671 21564 21644 21367 21553 21590 21563 21293 21677 21696 21786 21428 21874 21344 
33303 41411 34424 42361 38016 41064 34288 41545 33824 35488 35469 42336 37010 40925 35444 42306 36339 42796 36544 34433 42913 33954 33720 42572 34583 33463 32967 35381 34048 33728 34395 42619 34608 34256 42359 35794 33812 33479 34062 34098 42786 35200 42295 35024 34698 42401 34592 35261 41671 35698 33871 34605 33504 35256 42021 36384 33677 42709 43189 35930 41476 37163 32873 32736 33200 36816 40769 36505 32960 42566 32987 36632 40108 35789 33128 33947 42327 36561 40282 36113 32984 35296 41304 37356 42389 35312 42148 37464 40387 37319 42184 37385 42258 36886 41352 36520 42555 35008 41448 37296 40764 35835 42922 35584 41034 36849 42760 35808 32736 37380 41317 37952 35400 40275 34437 40481 34972 40410 35185 40336 36832 40248 35877 40496 36419 41627 36472 40675 36224 40004 37106 41124 34587 40385 35249 41207 35927 41064 35753 41793 36121 41644 35680 40501 34979 42570 34952 40917 35559 40496 36168 40760 35762 41644 35536 41818 36280 42464 36983 42816 35190 40696 33545 39702 34776 39828 39120 40610 42512 41172 33519 40836 34932 41286 34474 41963 35436 33369 36140 33831 36992 35156 36500 34681 37554 30531 32244 33611 33445 35552 34350 36708 36040 44102 34807 41012 35996 36195 32934 34505 37320 34240 42613 33861 42065 33288 41196 34001 42023 33875 41270 33680 42286 34461 41456 34105 42234 35777 32864 35169 32476 35266 42531 36001 41640 36372 41821 36235 42321 35667 42368 36216 41453 37094 41616 37000 41223 36452 41750 36010 41248 36249 41120 35876 40503 35521 40040 33844 39588 34208 39048 35930 39752 36180 39234 36933 32960 34562 40833 35271 40267 35318 39408 35636 39150 34768 39052 35341 40167 35737 39482 35952 40160 35090 40423 35542 40746 34525 40503 34772 39936 34587 40152 35275 39891 34019 39831 34729 40160 34534 39895 34681 39708 34368 39909 34177 40040 34326 39686 32944 40096 33685 40240 32971 40706 34736 40801 34048 41190 35501 42579 36247 40054 34485 39794 33646 40344 33202 41889 35898 34087 36656 34864 36864 34505 37081 32936 34672 41200 33639 41127 34432 41737 34774 33990 32626 42715 33762 42816 41280 32928 42358 33975 33024 33424 33785 33930 34406 34912 34025 34406 33120 34418 42240 43138 33530 33816 41000 34425 41977 34995 33557 35382 33720 35165 42476 36407 42818 36181 42253 35623 41509 34971 42329 34508 36694 40695 31591 37809 35197 40396 35820 41185 38266 31939 37041 34608 36473 40563 42144 35818 41675 36910 42208 36145 43032 36346 42784 37718 41656 37324 39401 42680 40962 36802 39354 37210 41012 36285 41270 35562 40545 36115 40027 35443 41558 35350 39813 37069 40666 36548 40265 36413 39827 36921 38786 35808 39649 35283 39412 36960 41792 36119 41077 35564 40176 35510 39984 34435 41142 35092 42466 36188 41731 35954 40464 35184 40935 34448 34712 34482 41570 36408 41944 36808 41066 35810 39879 34582 34502 34217 41302 36977 42775 35532 41707 34322 40467 33756 40980 36935 33202 34694 41690 34778 41671 34136 40125 33443 33706 36005 42473 34183 41515 33361 40640 33314 35148 36903 41299 34222 41389 42816 41559 33690 33936 37512 33172 34264 40855 42633 42695 34833 33882 35974 34763 35256 32940 38599 42902 42743 34680 32664 34237 42604 36278 41339 34144 33400 34064 34344 42817 33152 41425 34081 34891 34231 34852 42002 42986 33385 34431 34256 35671 32853 33866 40790 35558 42880 36064 34088 42966 41716 34935 42745 36275 33033 34261 40768 34740 42505 35842 33693 35316 42345 34592 40228 34704 42224 35770 33696 35568 33052 36472 41165 35401 40232 38139 39188 37394 33691 39248 36713 40009 37416 41543 40112 35689 35993 38788 41752 35648 40720 35905 42193 36408 41751 37513 41287 36204 43036 35927 41608 35732 40328 37576 41803 33988 40352 35298 40422 36624 41634 37620 41793 36545 42080 36614 41623 37160 41161 37585 41735 36967 41744 36576 41562 36416 33233 35776 32631 35748 40940 37736 41104 37495 40854 37428 40662 37616 39567 35061 39316 35656 41533 34241 40027 35989 40263 35744 40834 36236 40403 35312 41312 35248 42500 37093 41863 34467 41368 35252 41104 36438 41152 36029 41946 35372 41290 35827 40547 34983 41549 36615 42184 35383 39115 34800 42224 36025 41718 36947 40400 36571 41524 36471 40581 36582 41793 36214 40598 38568 39929 35120 41525 35995 32984 36457 40468 32995 33018 33882 40647 35994 41649 35158 33729 36262 42008 33979 41905 43211 41864 35099 42376 36769 33238 32375 41480 33079 41123 34539 34443 35659 41624 34313 40340 33598 34545 36827 39928 34013 41600 35034 33146 37383 42269 36765 40135 34969 32488 37386 34208 42723 42048 42857 41844 35872 34725 36209 41322 33352 40776 35090 41224 37344 35394 34000 41691 33255 33808 34190 33838 34181 34848 33127 41769 34864 34221 40040 33728 33403 33312 33018 33582 41937 34555 34264 34538 40089 37967 36324 35288 34464 42432 41908 41715 42564 34472 34212 35075 34346 35131 34025 34098 33480 34436 40328 33336 41508 35264 42487 35942 33761 36230 33142 35447 33351 34752 34013 33096 41753 42752 40656 34656 41472 34551 32724 34777 34835 35695 33728 34789 32455 35889 42420 36004 42467 34965 41830 33757 41312 35398 39141 36208 41650 35371 42504 36103 42928 37060 32589 35654 33104 36833 42760 36672 42436 36833 41900 35899 39763 34020 39733 37216 33590 36897 40809 35120 40660 35801 42091 36871 42127 37421 42724 37916 42496 37187 42344 36923 41856 37175 42000 37271 42820 37056 42277 36828 42498 37191 41755 37353 41218 37606 41596 37778 41230 37159 41393 37496 41792 38022 41592 36992 41530 36166 41408 36146 42758 36216 41357 36976 42048 38073 40215 36192 41273 36871 41762 36528 42164 36864 41883 36864 41701 36998 41389 38000 41272 38059 41672 36621 41746 37112 41866 36848 41531 36327 41195 36192 41233 35563 40775 35530 41579 36480 41095 35981 41027 35774 40744 34848 40608 36056 33890 36184 41282 35174 40311 35882 40192 36457 42137 36913 42228 36557 42345 35928 41809 38148 35608 40832 37558 41728 38552 42301 38471 40320 38541 40232 33294 34763 41264 36024 33267 36821 42951 37258 33444 35305 41459 35072 42138 35922 40864 34320 41056 33589 40545 33031 41067 36534 34761 37256 34112 36404 42024 33388 41676 34880 41488 33479 41127 34408 42557 33737 40435 35928 33872 37812 34768 35522 41428 34511 41472 34336 40624 33761 33142 42846 41080 34752 35165 37177 35910 35812 41645 35837 35433 33580 33710 33571 32995 41619 34304 32822 35336 33889 34780 34381 35238 33269 33248 42166 43216 43188 34540 33520 33848 34832 34875 34392 34224 42940 34629 41462 43172 33671 34516 34168 34641 34258 35527 32944 34267 32856 42855 42272 35073 33164 36936 32897 35607 34532 34658 41720 32849 40855 34892 42741 36173 33428 36203 33254 35468 42016 43416 41207 35986 33028 36207 42824 36582 42281 35664 41641 33888 42150 36240 32657 36486 33496 37045 41562 34633 42155 34231 42095 36992 42631 37161 32595 36696 41446 43340 40141 35888 42379 37287 42260 37807 33076 37077 40960 35720 40320 35888 42084 36817 42873 37120 32976 37104 41744 35942 41266 37227 40900 35490 41857 36544 42528 37552 42538 38020 42199 37351 39956 35883 40580 36010 40712 36288 40320 35688 41191 36629 41632 36954 41711 36144 41112 35877 41411 36839 40605 34455 41046 37080 41507 36007 41461 37737 40939 35345 41734 36165 40357 36893 40000 35879 39495 35488 41632 36105 40705 35748 41244 35917 42104 36698 40583 36701 40832 37716 41309 35828 41754 35942 40568 35800 41376 36108 40379 35669 41336 40235 33081 35672 40449 35992 42465 35620 40728 35372 42546 35514 40931 35341 32910 35266 42840 35044 41562 34985 33456 34912 41747 36368 41677 34779 41868 36066 42219 35273 41819 35096 39906 36535 42736 35365 40631 36096 42208 37392 41559 36225 41852 35941 32877 36076 40967 35952 42296 36884 41745 35639 40839 43145 33576 36322 41271 34678 40055 36612 33181 35441 40669 33688 33701 36582 41629 34460 40871 33844 34420 36157 41607 33924 40439 37588 33681 33805 41175 33840 34375 36672 42085 34953 42660 37351 41643 34454 40228 38005 41207 33239 41504 37290 41991 33216 41452 37533 41344 34672 42849 35691 40934 41728 33400 35303 33888 34829 34923 33895 35127 35104 33556 33517 35328 40704 35309 42660 34560 35037 32612 34599 34354 42514 36039 41476 35639 33111 34801 34552 42794 34396 34167 35211 32976 34677 33865 34040 34311 33216 35712 32503 36237 42151 36302 41768 36899 41637 36845 41968 36139 42803 36632 42403 35636 33456 34131 33220 35096 32684 34822 34020 36490 42887 32065 35064 39329 38541 31776 38406 32768 38634 34483 41778 39168 40357 39467 36067 36258 33480 35616 33452 36321 41429 36372 40400 37127 42368 35411 42574 31320 39928 38874 35041 32738 37799 32496 40076 33645 38794 43254 40333 42048 35992 37186 34199 36764 41738 37409 33108 35821 42587 35562 41115 36676 41299 36044 32152 34163 32197 40439 35437 39005 36242 41525 35352 42280 33771 41817 35392 39033 41512 35960 41593 37656 40464 36004 40601 35036 41290 35786 41873 35757 40064 39096 37491 33493 41032 37578 41204 38019 41831 36980 35259 43874 36889 41992 41952 38296 40696 35977 40852 37488 38705 35882 40365 36408 40869 35665 40890 35960 33529 38844 35947 41112 37024 40040 37066 42820 36908 42087 34640 38587 41178 35520 41669 35860 41504 35571 41319 36144 41664 35650 41489 35568 41939 34839 41177 34496 41696 35240 42001 36113 41395 36471 39344 33986 41237 36288 40002 41076 42192 35751 33121 34500 40902 34524 32796 35686 42896 35083 41653 36586 40769 37381 41936 35045 33202 33931 41068 36017 42090 37376 41224 33400 42597 35992 33260 32754 40972 35352 41232 37696 40932 42839 41520 33588 35160 35372 41028 33344 40993 37378 33395 33027 40240 34497 33031 37576 40064 33896 41462 35192 33795 34389 40774 33773 41375 36637 34481 42228 43145 35229 34056 33352 33511 32935 34306 34345 34744 32720 42496 35453 34706 34484 34081 33938 42264 41290 34349 33504 34658 33516 41201 33458 34227 33936 35330 33929 42240 37142 33840 34618 35152 33601 32393 33988 34129 33105 35786 42420 33753 40100 35126 33990 35104 33477 34278 42533 35040 33473 35635 34341 35447 40112 33676 42051 37185 32940 35562 41648 33194 41721 36522 42416 36192 43025 34541 41819 35328 33220 36775 42449 36516 40984 34080 41112 36834 32951 36906 41171 35776 39907 35444 41664 37846 42432 36987 42099 34480 41280 36410 33340 36373 33164 36889 40416 35872 41728 36770 42696 38259 41656 37318 40297 35530 41323 37511 41248 37304 41600 36880 39766 36571 40013 35781 41440 36795 41838 36052 41442 35202 41298 36196 41336 36722 42101 35512 41425 36052 41145 36503 41627 35200 40155 38112 38496 35815 40807 36864 40448 35840 40847 36378 40140 35470 40685 37767 38820 35952 41248 36773 40800 35240 42385 35164 40576 36464 41048 35766 42176 35504 41593 35350 41526 36057 40199 35797 41472 35948 41328 36741 41097 34512 41576 34989 41718 35045 41408 36292 34827 35430 39955 35612 41837 36119 41416 34289 41239 37292 41175 37029 40762 36962 41393 37568 42720 35741 40155 35994 42808 35840 42183 37223 41254 36448 41689 34138 41482 34866 34375 34394 40275 37713 40912 33447 42508 33639 40936 36276 41829 42912 34893 34816 41377 36704 42614 33371 40276 37337 41131 34118 40868 37773 41755 33440 40938 36229 42987 35440 40576 33659 34340 34650 41057 32812 41408 34538 33809 42589 34872 34392 34006 41615 36146 34259 34053 42324 35463 33105 41927 35129 34976 33076 34437 33001 34008 41975 35398 33408 42489 35227 34280 42265 35136 32486 32944 34357 32832 32736 35904 42480 35790 33921 42632 34189 34913 42088 35808 41463 36525 42412 35415 33738 33874 42777 34378 33446 34893 34448 37795 35429 31264 37968 33436 39322 35020 40704 35431 37458 35906 38121 40578 36228 32714 32795 38502 39203 40400 40855 31917 31330 32981 32066 42562 43029 40622 36811 36297 34019 40473 34690 38153 37680 41463 38660 42194 39115 32311 40140 35802 36688 39691 33557 37991 33504 32976 39624 37324 41600 38771 31784 38272 34388 37923 40552 40494 35048 35890 42132 34768 33792 41088 36291 42355 37211 42913 36566 41776 38327 40796 34284 36101 41099 35514 41781 36680 40793 37360 41874 35810 41728 34833 42384 36619 40688 34840 40567 36416 39479 37419 40714 36138 40907 34794 40698 34672 40393 37114 39867 36668 39672 36285 41472 35960 40009 37328 40529 36688 40946 35240 32935 34825 41031 35697 40648 36115 40248 36471 41360 35895 40743 35155 40816 36176 40245 35642 41697 33900 40649 36208 41811 35168 41552 35141 40819 36489 41000 36024 41720 34887 40912 36434 40328 36167 41850 35319 40673 35808 40741 34934 33810 34217 41457 36932 39640 35046 42578 34803 41283 34702 34144 33883 42123 36486 40368 34683 41216 37170 40838 35110 33536 34304 41620 33600 33752 33516 40738 35200 34864 35884 42088 37276 41209 
23495 23895 23584 23620 23703 23552 23773 23591 23552 23844 23384 23733 23498 23644 23744 23491 23752 23514 23753 23664 23552 23660 23873 23279 23877 23494 23709 23704 23541 23608 23771 23354 23739 23616 23665 23641 23639 23556 23931 23479 23701 23636 23632 23732 23721 23620 23899 23609 23823 23600 23724 23464 23913 23591 23739 23619 23790 23752 23917 23505 23942 23620 23905 23079 23912 23439 23892 23611 23881 23618 23952 23472 23924 23581 23847 23427 23984 23514 23651 23425 23930 23272 23840 23583 23722 23350 23976 23399 23790 23480 23924 23364 23988 23447 24064 23488 23932 23430 23959 23529 23682 23457 24015 23244 23853 23458 23759 23385 24012 23407 23861 23504 23976 23634 23843 23431 23750 23261 23950 23217 23808 23486 23748 23335 23831 23432 23752 23327 23859 23497 23809 23453 23717 23340 23840 23213 23931 23427 23744 23214 23832 23371 23752 23384 23869 23275 23849 23453 23741 23635 23351 23631 23321 23613 23440 23745 23511 23689 23600 23735 23414 23495 23224 23302 23214 23711 23824 23453 23244 23338 23288 23547 23365 23460 23364 23570 23517 23734 23553 23764 23616 23756 23624 17332 19216 19693 19808 20134 20329 20284 20433 20249 20557 26002 25002 24177 24272 24029 23988 23716 23831 23568 24267 23552 23728 23449 23760 23390 23722 23382 23738 23447 23712 23379 23720 23403 23764 23499 23814 23520 23847 23451 23781 23454 23880 23379 23782 23452 23876 23429 23795 23404 23872 23378 23916 23262 23844 23345 23755 23375 23668 23260 23710 23291 23709 23291 23568 23182 23525 23178 23612 23150 23663 23153 23763 23335 23739 23708 23656 23302 23641 23218 23718 23191 23730 23154 23641 23127 23567 23173 23680 23176 23621 23237 23624 23264 23605 23212 23638 23195 23613 23255 23561 23252 23586 23284 23612 23256 23603 23287 23608 23278 23590 23238 23660 23257 23654 23218 23495 23269 23485 23296 23444 23287 23399 23280 23508 23320 23513 23129 23671 23434 23518 23221 23299 23169 23473 23410 23688 23552 23815 23648 23739 23628 23724 23556 23536 23436 23504 23332 23509 23377 23611 23709 23289 23519 23303 23725 23141 23405 23284 23568 23456 23639 23557 23664 23511 23629 23492 23628 23574 23660 23331 23569 23329 23505 23200 23592 23321 23649 23435 23685 23489 23655 23404 23753 23452 23853 23351 23703 23268 23644 23565 23520 23225 19484 20060 20897 20689 21367 21032 21481 21063 21594 21165 25280 24144 24512 23644 24013 23479 23961 23494 24001 23565 23981 23447 23882 23510 23904 23272 23808 23118 23676 23222 23826 23325 23751 23335 23666 23232 23713 23244 23644 23341 23720 23246 23778 23332 23831 23201 23742 23183 23726 23143 23662 23290 23728 23152 23749 23353 23716 23345 23660 23317 23685 23219 23572 23169 23580 23330 23719 23404 23670 23259 23674 23345 23617 23288 23588 23220 23774 23412 23713 23186 23616 23356 23591 23232 23511 23262 23705 23468 23645 23382 23614 23300 23435 23192 23620 23552 23722 23372 23560 23413 23537 23289 23373 23528 23726 23641 23565 23395 23433 23335 23408 23533 23749 23582 23541 23364 23386 23362 23461 23493 23796 23561 23489 23320 23345 23501 23447 23605 23826 23501 23657 23788 23377 23461 23337 23590 23506 23735 23512 23696 23163 23538 23399 23729 23529 23632 23410 23387 23408 23642 23535 23714 23420 22946 23316 23601 23476 23738 23509 23641 23225 23609 23373 23748 23488 23594 23405 23503 23408 23776 23461 23680 23318 23553 23344 23770 23457 23813 23442 23653 23264 23527 23325 23769 23479 23803 23494 23820 23326 23673 23757 19938 20537 21538 21361 21997 21645 22072 21709 22201 21694 25336 24030 24269 23797 23952 23363 23911 23491 23884 23513 23920 23450 23889 23479 23881 23486 23679 23288 23477 23396 23590 23227 23750 23276 23789 23318 23826 23298 23821 23360 23744 23399 23860 23348 23846 23291 23808 23371 23800 23381 23778 23467 23692 23480 23760 23360 23781 23264 23862 23256 23829 23280 23778 23289 23779 23211 23657 23176 23689 23256 23151 23153 23689 23226 23692 23285 23704 23328 23622 23360 23731 23449 23759 23258 23680 23328 23616 23325 23632 23457 23759 23296 23620 23242 23661 23402 23720 23415 23734 23231 23680 23315 23634 23274 23729 23355 23617 23332 23568 23361 23640 23409 23733 23311 23462 23099 23580 23378 23624 23441 23735 23504 23638 23242 23568 23224 23552 23400 23668 23501 23802 23485 23557 23218 24016 23441 23606 23407 23677 23588 23720 23271 23536 23341 23610 23431 23799 23408 23558 23287 23584 23426 23846 23564 23415 23340 23490 23385 23783 23571 23344 23405 23556 23393 23656 23707 23627 23360 23484 23401 23543 23568 23809 23520 23428 23404 23520 23398 23526 23686 23737 23505 23328 23629 23605 23712 23520 23620 23429 23524 23264 23624 21396 22228 22150 22419 22313 22492 22102 22510 22306 25156 24173 24071 23805 23883 23725 23655 23511 23521 23261 23632 23473 23787 23589 23718 23552 23751 23575 23709 23321 23552 23392 23649 23351 23767 23472 23808 23476 23797 23498 23785 23575 23639 23432 23580 23193 23524 23216 23655 23438 23703 23453 23790 23507 23779 23537 23827 23488 23768 23423 23808 23398 23660 23252 23519 23175 23816 23049 23660 23357 23752 23366 23854 23503 23789 23460 23919 23414 23910 23428 23873 23335 23814 23280 23620 23190 23657 23331 23571 23143 23688 23302 23719 23325 23697 23369 23808 23431 23893 23372 23854 23417 23767 23430 23862 23445 23872 23407 23811 23446 23834 23409 23873 23368 23840 23287 23904 23313 23840 23303 23791 23342 23783 23347 23840 23355 23882 23330 23787 23424 23696 23350 23767 23418 23790 23449 23847 23334 23829 23288 23799 23354 23802 23385 23845 23307 23795 23431 23760 23316 23840 23301 23794 23360 23831 23338 23829 23407 23788 23361 23800 23403 23697 23340 23703 23338 23708 23328 23737 23290 23643 23328 23672 23281 23666 23292 23633 23407 23588 23213 23654 23228 23600 23281 23672 23392 23697 23417 23759 23428 23759 23442 22460 22491 22957 22597 22957 22738 23097 22852 23048 22790 24037 23443 23709 23377 23645 23585 23744 23534 23753 23604 23752 23462 23623 23461 23646 23351 23619 23377 23494 23481 23425 23360 23693 23660 23872 23684 23812 23424 23558 23431 23472 23412 23511 23361 23174 23386 23415 23314 23608 23674 23884 23717 23693 23438 23561 23419 23547 23292 23559 23198 23414 23388 23557 23617 23748 23798 23779 23437 23707 23592 23549 23686 23782 23633 23223 23577 23459 23783 23471 23752 23442 23793 23439 23686 23406 23623 23303 23532 23587 23690 23586 23660 23605 23703 23448 23677 23535 23467 23469 23627 23572 23740 23606 23764 23583 23655 23373 23509 23296 23676 23448 23879 23474 23714 23607 23719 23396 23160 23273 23611 23414 23834 23483 23811 23560 23830 23384 23630 23225 23723 23424 23815 23461 23882 23473 23754 22754 23535 23296 23770 23524 23905 23497 23864 23344 23768 23024 23639 23329 23791 23457 23889 23473 23860 23370 23760 23372 23721 23304 23832 23383 23938 23437 23916 23290 23777 23353 23626 23368 23732 23409 23888 23485 23920 23407 23772 23402 23609 23201 23704 23372 23872 23507 23828 23412 23940 23439 23841 23269 23758 23193 23776 23224 24334 23044 23798 23279 23701 23259 23745 23368 23808 23303 23756 23343 23778 23472 23661 23267 23709 23429 23573 23360 23727 23326 23730 23430 23831 23275 23798 23258 23767 23324 23672 23302 23817 23253 23840 23260 23884 23298 23702 23236 23735 23395 23772 23169 23799 23290 23713 23432 23764 23581 23816 23351 23669 23409 23760 23362 23637 23409 23744 23318 23600 23440 23709 23330 23825 23432 23704 23338 23691 23344 23531 23475 23729 23348 23707 23313 23545 23475 23698 23349 23669 23370 23528 23447 23744 23372 23681 23372 23760 23469 23618 23367 23623 23404 23790 23408 23654 23397 23664 23510 23662 23366 23633 23320 23831 23515 23642 23368 23652 23473 23837 23445 23624 23309 23639 23635 23628 23404 23359 23298 23899 23473 23621 23317 23481 23697 23794 23438 23542 23224 23798 23718 23538 23298 23463 23616 23751 23438 23620 23473 23815 23396 23493 23328 23824 23473 23501 23507 23808 23349 23563 23477 23765 23485 23529 23683 23520 23528 23228 23650 23487 23526 23593 23672 23260 23773 23430 23607 23576 23687 23552 23802 23252 23719 23520 23580 23616 23469 23600 23676 23450 23822 23367 23784 23329 23772 23497 23651 23512 23662 23576 23595 23559 23532 23552 23612 23535 23513 23507 23539 23543 23466 23561 23758 23520 23579 23561 23543 23566 23602 23533 23689 23448 23759 23489 23785 23335 18295 18754 19954 19659 20429 20123 20600 20339 20702 20545 25987 24890 24761 24284 24440 23882 24392 23618 24253 23740 24042 23721 23885 23640 23965 23468 24070 19268 20786 20540 21591 20954 21486 20967 21676 21003 21736 25078 24902 24236 24393 23799 24311 23695 24065 23716 24014 23573 24036 23500 23931 23671 23820 23485 21025 21085 21789 21504 22016 21560 22269 21718 22252 25408 24911 24414 24310 23808 23994 23658 24008 23562 23882 23425 24078 23264 23882 23576 23776 23426 23832 21678 22679 22034 22643 22069 22624 22139 22801 22185 24955 23968 24173 23575 23964 23552 23856 23415 23908 23447 23780 23367 23909 23454 23897 23434 23821 22276 22251 22653 23083 22869 23216 22807 23237 22826 23142 23852 24017 23618 23906 23470 23757 23573 23644 23433 23834 23496 23721 23396 23779 23488 23888 23511 23680 23456 23784 23353 23645 23456 23782 23529 23653 23419 23715 23567 23648 23392 23776 23528 23850 23481 23628 23557 23835 23426 23777 23430 23674 23730 23485 23424 23716 23559 23778 23206 23591 23472 23744 23715 23502 23447 23591 23753 23881 23338 23589 23491 23733 23690 23628 23344 23653 23539 23853 23562 23681 23511 23572 23730 23604 23680 23511 23524 23820 23735 23484 23447 23539 23508 23868 23455 23653 23517 23537 23772 23651 23546 23600 23867 23523 23808 23382 23605 23644 23808 23634 23745 23368 23699 23544 23756 23691 23749 23384 23728 23575 23814 23600 23723 23360 23718 23633 23826 23573 23707 23383 23644 23584 23813 23604 23760 23360 24056 23464 23936 23555 23800 23279 23735 23480 23730 23654 23759 23392 23832 23477 23846 23611 23820 23396 23669 23368 23840 23514 23891 23440 23710 23372 23693 23547 23955 23488 23808 23211 23884 23424 23886 23476 23939 23459 23680 23256 23808 23500 23927 23467 23885 23284 23576 23370 23925 23464 23957 23335 23793 23233 23751 23456 23904 23575 23869 23416 23632 23495 23767 23457 23889 23431 23828 23315 23678 23273 23803 23347 23922 23399 23927 23318 23915 23269 23792 23404 23776 23360 23902 23343 23697 23453 23742 23411 23840 23389 23631 23373 23767 23332 23897 23230 23712 23379 23799 23403 23828 23235 23787 23372 23660 23309 23758 23364 23751 23306 23735 23414 23989 23305 23847 23344 23696 23471 23728 23342 23778 23391 23668 23405 23653 23396 23810 23328 23697 23493 23771 23383 23857 23292 23736 23440 23696 23512 23646 23351 23809 23488 23663 23498 23669 23467 23656 23415 23793 23321 23856 23116 23621 23291 23685 23507 23637 23625 23669 23544 23569 23577 23636 23654 23582 23644 23591 23639 23803 23350 23716 23145 23878 23436 23576 23569 23457 23662 23600 23452 23882 23386 23507 23672 23587 23355 23616 23644 23612 23398 23877 23437 23517 23449 23797 23570 23517 23478 23879 23445 23536 23380 23818 23616 23623 23368 23445 23750 23655 23616 23303 23617 23640 23653 23399 23813 23576 23634 23335 23735 23485 23759 23437 23797 23386 23674 23630 23660 23323 23750 23648 23639 23533 23765 23461 23733 23602 23655 23543 23847 23319 23713 23623 23624 23526 23767 23363 23799 23400 23782 23475 23624 23600 23744 23497 23797 23377 23846 23321 23877 23444 23664 23607 18785 19383 20091 19947 20377 20203 20609 20357 20763 26564 25716 24556 24861 24078 24458 19648 20887 20626 21403 20996 21685 21258 21725 21224 21780 25271 25109 24239 24679 24213 20840 21079 22020 21624 22283 21521 22343 21641 22365 21733 25496 24263 24649 23932 24401 23781 22230 22196 22552 22362 22676 22394 22830 22485 22653 24676 24592 23848 24208 23694 24200 22697 23264 22581 23307 22867 23269 22880 23056 22869 23164 23735 24199 23463 24112 22843 23918 23495 23896 23463 23852 23539 23791 23504 23950 23431 23952 23431 23858 23508 23936 23396 24147 23381 23841 23395 23847 23599 23861 23514 23767 23449 23818 23368 23907 23390 23909 23315 23818 23565 23784 23472 23713 23402 23900 23256 23815 23529 23764 23492 23728 23395 23916 23544 23812 23463 23879 23447 23841 23392 23783 23548 23764 23431 23785 23425 23765 23426 23734 23453 23782 23447 23841 23406 23744 23474 23676 23450 23819 23514 23654 23514 23829 23493 23661 23668 23769 23510 23888 23335 23710 23545 23829 23400 23797 23718 23515 23499 23792 23622 23674 23475 23904 23367 23666 23512 23926 23603 23649 23729 23719 23431 23625 23772 23537 
23010 22479 22813 22103 22987 22162 23058 22167 22908 22325 22790 22285 22841 22209 23077 22172 22841 22265 22850 22356 22797 22122 22970 22095 22957 22230 22819 22320 22855 22291 23036 22137 22796 22453 22755 22273 22851 22181 22938 22191 22813 22360 22729 22304 22900 22227 22794 22466 22663 22354 22839 22315 22790 22449 22774 22312 22856 22312 22740 22381 22757 22345 22784 22326 22683 22442 23033 22242 22793 22138 22721 22315 22209 22296 22825 22598 22807 22599 22629 22349 22945 22263 22683 22631 22605 22219 22722 22513 22474 22397 22720 22365 22633 22606 22586 22406 22921 22443 22494 22829 22560 22247 23065 22186 22597 22825 22421 22265 22796 22455 22512 22446 22888 22400 22346 22929 22322 22444 22868 22326 22464 22784 22439 22242 23035 22221 22501 22862 22313 22727 22564 22768 22197 23021 22345 22713 22499 22715 22299 22771 22746 22376 22469 22761 22439 22715 22555 22654 22405 22940 22448 22685 22593 22543 22607 22888 22150 23036 22272 22663 22568 22577 22478 22659 22447 22937 22428 22932 22177 22915 22462 22703 22437 22705 22437 22648 22599 22679 22264 22823 22157 22991 22364 22965 22173 22983 17489 17424 17959 17541 18221 17729 18420 23778 24232 23370 24040 23143 23638 22781 23397 22915 23552 22730 23168 22728 23083 22565 22976 22499 22984 22509 22861 22453 22871 22416 22796 22423 22879 22352 22829 22351 22865 22652 22763 22599 22935 22625 22712 22587 22900 22821 22973 22916 22958 22784 23088 22784 23151 22896 23088 22759 22886 22784 22825 22587 22674 22438 22519 22229 22328 22149 22370 22226 22673 22370 22585 22573 22758 22323 22080 22567 22365 22807 22416 22781 22341 22771 22512 22715 22496 22567 22406 22775 22534 22734 22402 22676 22405 22853 22363 22749 22417 22700 22297 22785 22293 22637 22345 22753 22285 22740 22305 22774 22240 22843 22235 22757 22176 22835 22239 22816 22209 22773 22219 22836 22744 23159 22042 22593 22010 22612 22102 22538 22080 22647 22248 22727 22282 22807 22310 22915 22328 23042 22293 22924 22087 22896 22096 22842 22237 22814 22172 22766 22185 22673 22443 22797 21931 22875 22127 22984 22240 22887 22259 22865 22095 22753 22230 22848 22296 22626 22140 22728 22156 22624 22250 22752 22354 22807 22445 22798 22389 22775 22205 22658 22133 22656 22119 22589 22276 22695 22217 22692 22153 17811 17936 18567 18604 19063 18876 19191 18813 19255 23798 24049 23592 23662 23201 23236 23351 23528 23280 23537 23209 23127 22784 22907 22698 22801 22458 22961 22695 22681 22471 22935 22899 23145 22995 22837 22644 22594 22711 22550 22592 22258 22720 22420 22889 22606 22985 22676 22982 22631 22758 22389 22692 22382 22528 22466 22752 22592 22983 22683 22952 22645 22792 22437 22599 22264 22799 22411 22957 22608 22990 22512 22944 22423 23059 22237 22731 22360 23008 22610 22939 22619 22825 22320 23186 22105 22776 22418 23025 22528 22992 22314 22787 22154 22760 22225 23040 22365 23157 22343 22924 22151 22793 22020 23011 22423 23065 22444 22828 22233 22572 22068 22931 22419 23026 22471 23033 22195 22806 22128 22812 22272 23034 22087 22817 22208 22854 22173 22935 22338 22772 22336 22707 22004 22698 22245 22887 22329 22871 22060 22872 22034 22844 22266 22807 22189 22675 22304 22657 22297 22949 22208 22844 22163 22727 22201 22877 22464 22743 22208 22676 22325 22807 22417 22789 22170 22647 22252 22730 22439 22784 22257 22656 22315 22641 22419 22950 22344 22740 22209 22713 22081 22768 22265 22697 22537 22701 22292 22625 22278 22528 22299 18886 18666 19436 19521 19897 19800 19950 19785 20192 20010 23835 23440 23937 23221 23104 22768 23232 23017 23321 23152 23144 22919 22899 22625 22845 22560 22655 22419 22761 22391 22540 22563 22794 22681 22901 22771 22955 22871 23017 22884 23079 22959 22961 22743 22937 22955 22921 22921 22742 22324 22592 22807 22472 22902 22499 22660 22478 22818 22428 22870 22394 22875 22368 22675 22311 22520 22232 22576 22458 22512 22536 22632 22464 22744 22528 22925 22647 22972 22540 22926 22383 22744 22313 22552 22449 22707 22477 23004 22454 22961 22377 22646 22416 22785 22451 23018 22481 22887 22352 22543 22341 22848 22586 22903 22480 22704 22066 23036 22273 23093 22408 23082 22376 22669 22106 23105 22404 22963 22491 23023 22315 22785 22176 22689 22352 22860 22247 23025 22472 23064 22404 22941 22135 22713 22058 22842 22274 23055 22347 23040 22128 22626 22656 22791 22472 22906 22404 22683 22103 22841 22461 23089 22387 22807 21997 22839 22416 23020 22483 22787 22022 22824 22384 23002 22428 22953 22230 22855 22203 22744 22159 22988 22225 22900 22192 22827 22167 22849 22241 22905 22317 22918 22286 22728 22137 22645 22370 22865 22338 22695 22100 22829 19657 20566 19945 21009 20375 21056 20364 21100 20528 23564 22955 23424 22791 23370 22695 23270 22420 23040 22288 22990 22385 22947 22497 22812 22534 23073 22406 23025 22428 22728 22487 22839 22256 22765 22347 22909 22345 22874 22386 22951 22473 22784 22500 22788 22297 22705 22442 22795 22341 22732 22264 22698 22423 22689 22453 22958 22429 22845 22390 22756 22327 22827 22186 22716 22243 22679 22464 22659 22237 22631 22253 22728 22489 22726 22488 22784 22573 22861 22749 22949 22753 22745 22416 22400 22135 22416 22218 22536 22336 22682 22305 22567 22312 22539 22367 22461 22411 22534 22284 22503 22453 22496 22337 22657 22434 22677 22587 22967 22768 23094 22825 22934 22945 23057 22727 23031 22864 22999 22785 22995 22800 22818 22812 23080 22597 22769 22697 22657 22566 22763 22295 22337 22359 22436 22725 22287 22792 22234 22641 22320 22682 22230 22627 22465 22769 22664 22841 22495 22858 22428 22761 22496 22790 22544 22830 22557 22920 22592 22860 22644 22855 22643 22736 22658 22877 22556 23045 22487 22855 22405 22885 22382 22708 22329 22731 22395 22483 22247 22465 22101 22593 22208 22572 22311 22745 22233 22892 22279 22904 22480 22948 21334 21818 21367 22064 21544 21934 21576 21916 21388 21975 22743 23045 22374 22846 22391 23046 22468 22976 22637 23083 22593 23092 22427 23056 22349 22967 22254 23346 22250 22820 22023 22784 22333 22938 22454 23016 22397 23059 22534 23006 22384 22949 22273 22791 22074 22581 22051 22673 22167 22854 22361 23018 22425 23047 22171 23022 22100 22873 22184 22864 22144 22849 22359 22951 22302 22955 22336 22701 22216 22868 22169 22695 22387 22723 22184 22852 22311 22894 22212 22867 22170 22668 22231 22826 22135 22784 22167 22854 22254 22941 22128 22789 22172 22756 22195 22731 22291 22743 22372 22936 22292 22871 22267 22719 22272 22663 22765 22620 22308 22762 22503 22880 22377 22628 22264 22638 22222 22746 22136 22836 22394 22869 22357 22689 22248 22725 22247 22682 22196 22854 22410 22777 22331 22561 22242 22584 22230 22649 22214 22756 22454 22838 22381 22567 22228 22554 22550 22528 22388 22876 22631 22688 22407 22587 22243 22777 22242 22580 22651 22849 22569 22450 22475 22657 22288 21890 22183 22476 22624 23000 22784 22578 22208 22516 22306 22466 22426 22368 22137 22680 22648 23011 22699 22744 22461 22505 22233 22441 22228 22555 22439 22733 22516 22513 22244 22428 22206 22327 22485 22432 22812 22915 22155 22563 22365 22739 22340 22292 22840 22632 22672 22332 22711 22594 22562 22373 22829 22196 22710 22545 22517 22551 22789 22178 22748 22349 22952 22451 22721 22279 22867 22181 22820 22467 22619 22625 22565 22428 22768 22316 22708 22672 22658 22374 22881 22449 22422 22567 22960 22279 22720 22499 22870 22395 22697 22609 22879 22316 22450 22375 22880 22503 22851 22291 22449 22272 22928 22453 22940 22241 22529 22373 23016 22452 22817 22279 22576 22288 22870 22551 22816 22047 22740 22509 22928 22226 22630 22267 22981 22400 22856 22081 22890 22377 23030 22256 22705 22074 22967 22402 22988 22081 22614 22224 23074 22352 22844 21992 22816 22445 22923 22216 22596 22212 22923 22374 22961 22401 22737 22339 22903 22263 22905 22001 22835 22518 22990 22120 22770 22345 22983 22153 22520 22180 23064 22141 22822 22253 22839 22103 22753 22192 22776 22101 22653 22301 22809 22208 22875 22192 22664 22266 22935 22150 22556 22341 22666 22145 22941 22148 22596 22272 22837 22203 22692 22251 23019 22131 22803 22214 22815 22189 22798 22183 22615 22203 22763 22168 22871 22053 22938 22160 22748 22108 22648 22247 22723 22306 22794 22384 22630 22369 22700 22313 22645 22400 22872 22285 22743 22255 22640 22261 22537 22308 22529 22222 22739 22226 22775 22185 16866 16553 17591 17228 18045 17751 18312 18056 18546 18363 24624 24220 24133 23747 24192 23385 23895 23149 23438 22949 23383 23268 23117 22960 23009 22664 23264 18092 18505 18797 18919 18936 19261 19256 19751 19285 24493 24677 24455 23840 24167 23363 23704 23163 23207 23429 23095 22941 23654 22773 22899 23251 22850 22724 19752 19479 19696 20167 20176 19815 20631 20298 20497 23991 24289 23641 23626 23762 23522 23080 23780 22872 23111 23186 23082 23180 23272 23043 22509 23286 20554 20711 20434 21147 20904 20923 20839 21458 21077 21506 23565 23930 23202 23399 23371 23246 22872 23160 23183 23015 22833 23266 23046 22934 22713 23241 22886 21699 21432 22113 21795 21924 21841 22217 21872 22009 21732 23594 23054 23240 22642 23192 23014 23074 22410 23099 22876 23238 22436 23053 22771 23184 22602 22942 22612 23184 22568 22826 22563 23185 22749 22951 22479 23099 22675 23072 22276 22944 22631 23249 22457 22775 22497 23216 22564 22784 22384 23041 22619 23043 22125 22957 22455 23186 22355 22833 22336 23184 22560 22985 22235 22983 22620 23093 22443 22739 22306 23159 22535 22891 22139 22924 22512 23095 22368 22734 22416 23021 22480 23062 22208 22623 22246 23137 22357 23010 22229 22772 22354 22888 22400 22900 22195 22778 22375 22995 22327 22971 22294 22817 22537 22932 22293 22899 22212 22881 22375 22861 22117 22885 22199 22804 22371 23064 22107 22837 22085 22921 22245 22851 22307 22829 22153 22829 22404 22926 22226 22839 22204 22880 22402 22816 22325 22828 22202 22848 22397 22828 22303 22769 22408 22665 22513 22853 22245 22600 22183 22828 22261 22859 22405 22632 22285 22673 22325 22872 22321 22680 22329 22816 22190 22783 22474 22748 22099 22864 22295 22606 22583 22934 22552 22452 22445 22631 22416 22665 22737 22891 22114 22712 22359 22660 22374 22891 22689 22698 22169 22567 22208 22539 22547 23059 22649 22485 22405 22441 22359 22571 22628 23026 22603 22392 22494 22440 22429 22600 22680 23046 22317 22377 22137 22528 22325 22913 22801 22643 22305 22481 22575 22697 22564 22496 22476 22354 22724 22677 22818 22355 22497 22249 22947 22546 22758 22216 22737 22536 22620 22333 22705 22641 22616 22325 22692 22648 22629 22204 22823 22599 22448 22503 22820 22303 22768 22580 22444 22378 23021 21999 22956 22389 22708 22529 22692 22848 22893 22363 22752 22522 22660 22367 22990 22102 22918 22429 23168 22428 22790 22330 22909 22073 23002 22260 22922 22343 22657 22578 22608 22464 22615 22408 22820 22311 22919 22279 22864 22218 22960 22291 22871 22274 22794 22361 22625 22376 22852 22224 23029 21994 23030 22205 22719 22487 22828 22167 23043 22325 22643 22471 22829 21952 23000 22408 22830 22228 22983 22389 22625 22253 23113 22055 22805 22248 22881 22141 22839 22189 22909 22188 22706 22372 22859 22288 22790 21757 22811 22519 22645 22121 23058 22267 22737 22117 22918 22128 22921 22147 22827 22155 22740 22232 22846 21591 22896 22115 22645 22228 22774 22098 22814 22139 22733 22384 22803 22195 22775 22173 22249 22384 22664 22226 22803 22254 22715 22337 22808 22295 22625 22359 22720 22151 22753 22185 22861 22197 22616 22250 16779 16870 17696 17664 18067 17928 18405 18277 18681 24393 24743 23868 24432 23458 24033 18312 19290 18929 19808 19262 19929 19568 20053 19657 25044 24376 24774 24034 24411 23695 20519 19874 20584 20243 20805 20471 20992 20657 20842 20317 24506 23962 23877 23583 23750 20964 21105 21444 21216 21578 21461 21582 21369 21437 21376 23719 23865 23346 24085 23085 23848 21929 22404 21991 22150 22081 22163 22515 22112 22368 23238 23062 23509 22871 23639 22790 23272 22736 23137 23095 22848 23264 22660 23376 22720 23054 22746 23034 22777 22938 22905 23092 22649 23101 22560 23124 22841 22874 23015 22571 22796 23024 22501 23082 22624 22897 22832 22724 22785 22991 22572 23124 22394 23033 22621 22956 22654 22952 22503 23044 22348 23057 22627 22880 22725 22924 22483 23095 22437 22875 22677 22739 22439 23112 22363 22959 22576 22757 22379 23220 22311 22917 22599 22723 22519 23040 22328 22973 22586 22725 22288 23186 22264 22823 22427 23031 22234 23147 22402 22735 22372 23152 22232 22908 22508 23098 22050 22944 22530 22843 22281 22996 22422 22583 22339 23092 22342 22867 22529 23093 22317 22805 22584 22934 22135 
