# Supplementary material for: An Active Feature Selection Strategy for DWT in Artificial Taste
Source: Hindawi journal article supplement (doi:10.1155/2018/9709505), 2018-01-01
Supplement: f1 [file 9709505.f1.zip › spirit-med-3.txt]

35529 32989 30866 30665 16904 20087 20419 21888 21563 22487 22100 22840 22368 23129 22564 23176 22511 23509 22440 23220 22471 23315 22709 23468 22739 23489 22624 23160 22989 23319 22778 23488 22814 23342 22935 23357 22987 23385 22855 23207 22698 23353 22817 23367 22849 23463 22974 23473 22991 23275 22849 23258 22928 23416 22795 23331 22872 23353 22988 23532 23192 23496 23184 23463 22944 23092 22800 23460 22838 23132 23045 23216 22951 23168 23026 23269 23331 23522 23304 23566 23328 23456 23188 23063 22779 23047 23028 23138 22944 23116 22921 23095 23047 23022 23104 23160 23325 23223 23329 23225 23520 22984 23432 22937 23505 22810 23329 22721 23131 22759 23080 22885 23131 23175 23296 23033 23376 23095 23371 23170 23537 23105 23538 23043 23651 23132 23445 23082 23626 23100 23571 23104 23540 22949 23491 22905 23366 22892 23495 22894 23473 22949 23368 22716 23341 22733 23320 22669 23312 22630 23407 22608 23377 22599 23344 22689 23443 22727 23296 22674 23321 22824 23437 22812 23364 22851 23363 23000 23465 22792 23421 22688 23502 22713 23424 22709 23446 22800 23527 22777 23495 22832 23402 22924 18511 19586 20753 20306 21360 20887 21633 21083 21835 21078 26312 24651 24654 23645 24064 23335 23884 23136 23531 22976 23559 23028 23360 22855 23420 22933 23428 22963 23462 22944 23353 22900 23392 22964 23413 22924 23398 22932 23400 22970 23435 23084 23512 23201 23479 23225 23525 23342 23546 23289 23478 23245 23379 23066 23237 23054 23349 22957 23173 22818 23183 22954 23170 22855 23232 22970 23050 22887 23152 22890 23186 22897 23348 23142 23136 22854 22896 22944 22676 23247 22965 23331 22885 23400 23022 23452 23128 23435 23101 23453 23198 23379 23239 23429 23204 23488 23161 23624 23153 23544 23056 23493 23075 23433 22828 23399 22962 23200 22790 23275 22838 23400 22849 23400 22921 23460 22933 23611 23117 23660 23156 23664 23059 23660 22999 23596 22973 23493 22825 23481 22760 23392 22798 23648 22752 23365 22628 23420 22808 23494 22864 23575 22831 23552 22850 23625 22942 23672 22903 23785 22915 23780 22731 23456 22676 23372 22696 23457 22734 23382 22643 23420 22895 23616 23034 23566 22905 23644 22792 23544 22726 23528 22848 23552 22743 23459 22774 23557 22938 23590 22947 23495 22999 23484 22903 23542 22981 23441 23005 23464 22950 23260 19698 21056 21018 21770 21482 22121 21632 22349 21840 26736 24714 24576 23664 23835 23472 23848 23079 23592 23254 23625 23165 23303 23301 22912 23143 23331 23041 23427 22940 23271 22900 23180 23404 23037 23372 23161 23182 23040 23048 23072 22857 23079 23031 23053 23168 23104 23479 23011 23117 23250 23348 23556 23096 22720 23184 23152 23088 23162 23523 22855 23211 23098 23541 22934 23237 23179 23397 23128 23250 22919 23194 23017 23518 23172 23400 23069 23383 22957 23277 22888 23504 23022 23591 23216 23616 23101 23448 23019 23353 22855 23421 22643 23339 22889 23524 22967 23599 23033 23579 22920 23424 22775 23324 22787 23463 22994 23700 22963 23619 22745 23393 22809 23605 22983 23655 22882 23383 22666 23512 23056 23700 22983 23395 22647 23510 23006 23796 22864 23397 22819 23621 22727 23536 22868 23603 22728 23296 22632 23526 22902 23346 22790 23542 22759 23409 22645 23560 22676 23808 22784 23453 22691 23401 22888 23472 22790 23397 22720 23344 22867 23404 22850 23342 22930 23207 22831 23511 22824 23403 22889 23344 22851 23389 22839 23384 22937 23316 22984 23251 22721 23321 22817 23407 22944 23448 23160 23272 22887 23273 23375 23530 20206 21340 21500 21927 22172 22257 22329 22333 22108 22628 24657 24689 23593 23872 23301 23278 23407 23106 23554 23172 23484 23296 23211 23222 23028 23244 22953 23416 23260 23463 23200 23206 23236 23217 23287 23149 23413 23031 23450 23165 23404 23081 23813 23104 23169 23097 23158 23174 23197 23225 23213 23141 23264 23063 23355 23032 23402 22869 23485 23021 23483 22639 23586 22812 23608 22896 23450 22989 23462 23046 23545 22970 23296 23055 23497 22982 23552 22876 23623 22664 23716 22762 23593 22809 23470 22947 23466 22956 23320 22977 23456 22858 23496 22866 23641 22637 23585 22649 23546 22791 23504 22843 23656 22930 23281 22694 23680 22714 23632 22706 23385 22764 23483 22947 23478 23024 23292 22816 23474 22701 23552 22594 23516 22735 23481 22892 23492 22640 23428 22760 23600 22169 23380 22772 23382 23025 23361 22887 23270 22872 23446 22886 23340 22836 23287 22980 23328 22820 23319 22784 23438 22836 23376 22868 23424 22872 23329 22838 23312 22901 23488 22793 23353 23094 23163 23232 22989 22944 23464 22996 23336 22791 23098 23221 23492 23035 23176 22940 23542 22984 23184 23215 23106 23058 23175 22918 23560 22897 23186 23246 23052 23191 21647 21890 22792 22174 22616 22856 22713 22560 22635 24963 24033 23694 23388 23673 22890 23676 23137 23127 23389 23376 22966 23524 23115 23284 23188 23207 23140 23454 22892 23372 23198 23192 23182 23520 22724 23464 22951 23297 23121 23463 22952 23504 22953 23420 23108 23445 22898 23636 22862 23382 22960 23424 22736 23579 22816 23347 22982 23377 22763 23645 22839 23455 22947 23412 22760 23744 22756 23445 22891 23602 22692 23741 22807 23700 23012 23557 22656 23543 22902 23183 22904 23598 22568 23592 22951 23435 22878 23700 22725 23482 22712 23569 22720 23414 22837 23386 22754 23442 22899 23445 22727 23431 22741 23399 22952 23479 22789 23546 22652 23383 22632 23433 21987 23514 22946 23399 22797 23483 22880 23428 22736 23484 22744 23320 22823 23365 22893 23299 22884 23236 22839 23527 22727 23344 22828 23516 22825 23278 22983 23255 22819 23479 22800 23308 22839 23424 22752 23224 23064 23274 22884 23172 23092 23105 22865 23328 23246 23089 22974 23467 23028 23155 22999 23512 22709 23272 23056 23391 22853 23144 23239 23106 22932 23484 22905 23095 23364 23069 22939 23504 23124 23126 23072 23017 23191 23114 22884 23602 22800 23074 23303 22281 22727 22392 22982 22800 22974 22775 23008 22834 23136 23520 23728 23439 23542 22905 23432 22954 23380 22984 23485 22970 23451 23028 23478 22991 23478 22896 23512 22754 23650 22791 23527 23014 23432 23111 23212 23137 23415 23040 23579 22784 23607 22769 23499 23111 23345 22905 23552 22660 23484 22968 23418 22855 23653 22730 23575 23010 23366 22979 23603 22622 23732 22915 23408 22873 23634 22793 23360 22958 23482 22689 23435 23019 23565 22822 23355 22989 23546 22580 23384 22966 23648 22668 23225 22819 23645 22630 23494 22773 23432 22717 23384 22680 23533 22766 23336 22715 23544 22860 23339 22813 23616 22849 23665 22770 23514 22695 23440 22830 23438 22584 23512 22772 23367 22804 23339 22734 23527 22858 23320 22922 23275 22915 23397 22925 23417 22792 23319 22997 23285 22967 23264 22863 23468 22796 23360 22856 23305 22871 23369 22928 23338 22941 23274 22731 23406 22948 23476 22761 23338 22808 23249 22946 23099 22951 23048 23048 23180 23095 23159 23187 23604 23120 23188 23239 23157 23197 23204 23203 23057 23285 23090 23298 22957 23453 23109 23374 23040 23391 22995 23335 23033 23282 23281 23309 23176 23102 22969 23023 23057 22933 23271 22816 23514 23040 23376 22889 23264 22722 23287 23086 23136 23428 22928 23472 22845 23488 22760 23405 22973 23288 23127 23047 23176 23314 22997 23287 22769 23517 23115 23398 23260 23168 23189 23280 23047 23504 22877 23520 22941 23428 23170 23261 23040 23405 22852 23500 22820 23356 23057 23272 23194 23393 22823 23552 22637 23573 23032 23609 22920 23305 22882 23600 22816 23623 22906 23350 23072 23412 22854 23593 22672 23541 22973 23266 22816 23601 22577 23628 22917 23337 22834 23525 22530 23702 22775 23448 22944 23396 22776 23547 22846 23416 22913 23476 22776 23589 22776 23371 22916 23476 22734 23618 22692 23497 22696 23412 22656 23525 22661 23392 22842 23451 22595 23405 22728 23405 22875 23413 22790 23437 22773 23307 22855 23516 22696 23507 22643 23382 22700 23379 22736 23624 22720 23384 22824 23281 22692 23531 22630 23381 22736 23249 22786 23394 22820 23326 22985 23369 22838 23288 22949 23224 22808 23416 22712 23313 23057 23373 22839 23387 22724 23277 22976 23364 22790 23410 22769 23228 22869 23386 22827 23187 22899 23300 22848 23572 22628 23092 23094 23171 22804 23248 23004 23079 22897 23376 22845 23275 23171 23351 22939 23413 22704 23168 23207 23110 22729 23214 23117 23040 22924 23534 23009 23089 23284 23003 22988 23419 22848 22969 23035 23374 22957 23077 23297 23065 22954 23575 22791 18845 20400 20781 20856 21287 21398 21169 21809 21610 27993 25622 25184 24029 23939 23671 23877 23226 23662 23501 23501 23105 23560 23193 23238 23120 23509 22995 20279 21013 21731 21523 22246 21997 22280 21972 22663 26341 25292 24247 24342 23304 23708 23516 23607 23157 23689 23159 23337 23072 23751 22995 23152 23049 19924 20678 22050 21840 22510 21865 22805 22369 22848 22169 25806 24200 24126 23346 23943 23054 23730 23102 23848 22755 23668 23024 23539 22814 23697 22828 23587 20893 22401 21820 22692 22412 22904 22408 23105 22580 22864 24038 24409 23081 23888 22960 23736 22733 23563 22928 23437 22742 23537 22936 23434 22800 23492 22636 22507 22455 22952 22368 23110 22612 23249 22480 23297 22464 23954 23057 23742 22856 23552 22941 23440 22725 23296 22886 23233 22805 23450 22784 23312 22903 23456 22784 23383 22854 23307 22802 23309 22811 23285 22965 23296 22894 23360 22839 23296 22752 23281 22976 23368 22945 23393 22912 23393 22710 23272 22984 23124 23180 22934 22925 23287 22848 23400 22842 23157 23132 23177 23213 23044 23081 23456 22790 23496 22829 23111 23237 23176 23278 23018 22941 23516 22881 23434 22837 23148 23350 23274 23027 23339 22896 23324 22881 23163 23303 22912 23086 23255 23094 23146 23364 22839 23626 22978 23214 23010 23472 22876 23460 23185 23063 23127 23453 22792 23318 23220 22981 23127 23445 22916 23424 23162 23285 22853 23465 22912 23348 23168 23364 22772 23552 23078 23209 22887 23539 22869 23233 23066 23544 22739 23418 22996 23568 22727 23496 23049 23402 22720 23608 22974 23317 22784 23604 22907 23307 22808 23593 22827 23248 22786 23656 22796 23431 22920 23604 22839 23195 22909 23493 22856 23304 22915 23635 22728 23342 22887 23664 22755 23467 22722 23400 22894 23421 22652 23472 22928 23329 22651 23404 22983 23449 22877 23431 22744 23447 22612 23428 22619 23474 22744 23368 22720 23528 22678 23374 22779 23573 22736 23369 22802 23447 22933 23285 22805 23365 22969 23338 22926 23358 23040 23387 22762 23305 22763 23402 22778 23008 22752 23320 22983 23282 22817 23333 22965 23227 22786 23248 23067 23429 22812 23076 22961 23453 23003 23264 22920 23313 23072 23079 22912 23185 23258 23264 23000 23031 22967 23524 22867 23652 22814 23317 23332 22976 22770 23004 23361 23083 22338 23056 23153 23459 22837 22953 23040 23391 23196 23106 23188 23392 23233 22919 23767 23078 23458 22929 23147 22881 23368 23146 23215 22778 23296 23087 23488 22920 23309 23010 23514 23147 23197 22871 23287 23047 23472 22824 23451 23069 23585 23022 23213 23052 23495 22960 23493 22880 23218 22884 23593 23052 23440 22649 23432 23022 23572 22844 23217 22785 23470 22948 23552 22710 23202 22820 23656 22912 23598 22561 23457 22727 23638 22936 23434 22673 23409 22951 23637 22912 23400 22662 23442 22966 23714 22799 23313 22487 23549 22888 23745 22704 23475 22631 23472 22651 23596 22902 23229 22735 23361 22776 23524 22965 23245 22786 23473 22608 23543 22745 23476 22830 23432 22760 23332 22863 23541 22593 23468 22734 23303 22827 23477 22864 23140 22738 23323 22859 23415 22885 23219 22852 23414 22892 23435 22934 17696 19396 20764 20688 21493 21237 21783 21239 21808 21372 26637 25124 24738 23702 23857 23474 20568 21161 22133 21940 22038 22104 22197 22157 22389 26728 25318 24192 24070 23590 23473 20580 22106 22306 22188 22263 22403 22320 22597 22588 23079 24868 24057 23538 23520 23312 21286 22104 22778 22593 22540 22599 22784 23041 22912 23132 24418 24199 23450 23595 23674 23545 22672 23148 22840 23081 22715 22899 22755 23106 22943 24215 23648 23809 23201 23492 22896 23444 22917 23573 23191 23656 23104 23458 22861 23255 23288 23383 23079 23596 23061 23612 22901 23199 22604 23431 23008 23524 22957 23546 22952 23244 22679 23416 22955 23652 22984 23552 22829 23385 22788 23488 22857 23648 22969 23655 22918 23469 22502 23328 22889 23617 22942 23651 22836 23484 22535 23508 22597 23477 22657 23528 22762 23552 22790 23484 22656 23024 22717 23400 22726 23418 22817 23501 22784 23496 22512 23459 22596 23464 22682 23575 22883 23481 22694 23325 22788 23375 22768 23264 22841 23477 22916 23304 22769 23291 22769 23240 22877 23321 23007 23576 22955 23393 22777 23223 22744 23198 22856 23264 22955 23501 22769 22993 23024 
21668 21992 21415 22295 21276 22183 21568 22134 21504 21984 21558 22128 21427 22144 21383 22146 21400 22068 21526 21993 21610 21898 21559 21883 21463 21977 21436 22059 21177 22217 21280 21952 21507 21958 21307 22212 21264 22019 22189 21789 22626 21799 22540 22165 22553 22154 22530 21864 22373 21733 22135 21885 22291 21905 22488 22008 22499 21981 22604 22104 22593 21905 22372 21683 22192 21566 22279 21479 22518 21703 22492 21927 22581 21927 22592 21953 22720 22040 22468 21830 22328 21735 22327 21524 22197 21580 22279 21619 22288 21584 22305 21734 22314 21574 22343 21690 22413 21832 22420 21860 22363 21782 22436 21793 22408 21596 22327 21577 22233 21372 22082 21538 22247 21623 22210 21660 22209 21729 22273 21690 22287 21746 22203 21806 22110 21856 22303 21931 22383 21845 22478 21856 22423 21698 22289 21827 22321 21767 22375 21687 22192 21635 22183 21789 21959 21590 22117 21655 21979 21558 21791 21713 21798 21619 21790 21840 21936 21736 21953 21879 22129 21592 21847 21884 22019 21890 22139 21413 21909 21724 21931 21770 21852 21719 21810 21684 21911 21623 21977 21839 21955 22239 21816 22232 13837 15633 15360 15874 15864 16464 16409 16628 16384 16787 24316 23957 23383 23209 22825 22913 22335 22522 22195 22608 22064 22505 21787 22319 21885 22160 21837 22259 21847 22262 21760 22265 21656 22256 21754 22329 21875 22333 21724 22400 21777 22485 21799 22405 21856 22551 21911 22476 21845 22624 21852 22694 21909 22635 21868 22582 22043 22622 21969 22444 22020 22412 21943 22500 21869 22388 21746 22501 21568 22365 21368 21706 21848 22245 21573 22289 21606 22347 21751 22348 21825 22371 21719 22337 21703 22464 21847 22488 21736 22480 21760 22425 21650 22350 21765 22263 21736 22139 21728 22252 21751 22137 21584 22087 21623 22199 21651 22212 21619 22044 21802 22198 21771 22221 21835 22295 21926 22307 21869 22338 21895 22145 21942 22080 21784 22058 21578 22100 21677 22037 21677 22001 22217 22085 21778 21793 21610 22032 21874 22182 22096 22417 22274 22417 22241 22533 22144 22362 21962 21890 21788 21923 21504 21908 21607 21787 21625 22230 21592 21673 21632 21552 21815 21777 22016 21818 22236 22054 22231 22059 22359 22017 22167 22105 22352 22104 22288 21984 22235 22041 22289 22032 22149 21778 22025 21682 22135 21634 22106 21628 22087 14644 16374 16569 17424 17408 18563 17756 18401 18094 18704 24771 24325 23044 23498 22713 23248 22469 22551 22154 22896 21946 22948 22061 22503 21807 22720 21548 22587 21793 22405 21973 22102 21986 22241 21820 22372 21697 22397 21469 22528 21399 22501 21577 22593 21427 22506 21621 22405 21530 22279 21724 22241 21688 22234 22125 22426 21772 22272 21778 22459 21551 22261 21664 22375 21509 22140 21548 22336 21505 22122 21109 22121 21641 22234 21806 22202 21749 22047 21627 22149 21623 22182 21741 22243 21794 22260 21740 22152 21536 22085 21597 22111 21643 22092 21621 22078 21643 22249 21769 22180 21693 22068 21799 21984 21575 21772 21771 22200 21938 22071 21620 21901 21625 21920 22040 22278 21745 21778 21712 21749 22119 22384 21692 21741 21472 21952 22169 22066 21562 21157 21818 22294 21861 21792 21671 22194 22082 21769 22016 21529 22149 21972 22137 21622 22325 21826 22076 21833 22213 21753 21893 22060 22159 21859 21948 22097 22024 21529 22185 21863 22016 21851 22316 21455 22120 21941 22099 21894 22283 21760 22315 21895 22075 21792 22307 21405 22302 21634 22164 21925 21983 21857 22254 21416 22387 21604 22199 21824 21954 21888 22185 21555 17865 17461 19027 18349 19300 18883 19303 19172 19491 19357 24032 22992 23320 22186 23040 21968 22902 21888 22539 21821 22359 21643 22453 21561 22106 21829 21943 21784 22252 21794 22130 21683 22060 21847 22137 21605 22050 21761 22250 21560 22068 21713 22263 21600 22117 21746 22122 21729 22048 21634 21967 21736 22067 21755 22002 21649 22084 21593 22183 21570 22216 21395 22103 21513 22080 21585 22029 21626 22094 21715 21963 21740 22009 21787 22061 21701 22235 21597 22261 21720 22125 21593 21878 21888 21876 22049 21865 22035 21933 21756 21836 21648 22163 21495 22417 21509 22150 21549 21898 21917 21841 22053 21785 22057 21705 21616 22090 21639 22251 21735 22127 21588 21813 21954 21818 22001 21739 22316 21537 22180 21767 22039 21911 21841 21885 22042 21681 22209 21488 22135 21792 22037 21960 22026 21894 21961 21576 22176 21480 22363 21484 22099 21772 22000 21895 22028 21627 22400 21477 22376 21624 22123 21831 21895 21751 22071 21575 22307 21355 22234 21584 22008 21721 22045 21569 22416 21255 22450 21353 22183 21714 22058 21636 22215 21474 22392 21240 22421 21637 21588 21752 22144 21568 22369 21389 22391 21628 22111 21662 22058 21401 18796 18520 19809 19489 20041 19685 20509 19758 20501 20018 23562 22541 22541 22055 22728 21627 22362 21632 21595 21520 22375 21523 22320 21521 22061 21591 21989 21435 22298 21565 22056 21729 21991 21495 22171 21715 22161 21571 22432 21590 22148 21575 22113 21596 22007 21725 22028 21459 22028 21648 21959 21560 22084 21480 22114 21402 21972 21763 21981 21427 22087 21409 21826 21914 21728 21699 22066 21532 21745 21802 21820 21464 22140 21711 21775 21850 22145 21923 21738 22026 21927 21650 22361 21579 21852 22073 21629 21635 22240 21558 21700 21588 22137 21871 21723 22166 21668 21429 22237 21813 21717 21985 21587 21960 21767 22134 21550 22215 21648 21767 21745 22231 21596 21869 21858 21895 21711 22108 21852 21841 21788 22179 21697 21836 21843 22091 21356 22074 21792 22045 21521 22281 21669 21937 21817 22274 21544 22073 21800 22150 21404 22264 21693 21921 21568 22261 21589 22080 21673 22261 21468 22068 21656 22286 21287 22067 21696 22156 21269 22253 21685 22032 21408 22408 21527 21958 21584 22407 21440 22087 21813 22082 21425 22279 21565 21969 21729 22080 21409 22264 21401 22173 21374 21975 21229 22349 21240 22039 21513 21869 21386 22103 19880 20998 20456 21068 20749 21239 20788 21277 20722 23222 21937 22588 21552 22384 21415 22196 21497 22119 21462 22000 21417 22167 21495 22000 21397 22112 21468 21979 21406 22051 21944 22085 21510 22016 21565 21949 21703 21872 21658 21917 21497 22121 21422 21936 21546 21953 21514 21964 21596 22068 21604 21955 21496 22043 21604 21960 21666 21800 21809 22045 21430 22043 21602 21911 21643 22106 21530 21677 22028 21840 21495 21708 22009 21697 21424 21760 22134 21917 21361 21623 22065 21933 21475 21653 21705 22213 21513 21696 21392 22221 21745 21617 21863 21948 21946 22165 21869 21573 22182 21752 21873 21665 22169 21600 21873 21753 22185 21664 21962 21814 21933 21744 22173 21475 21879 21896 21296 21718 22224 21440 22064 21679 21645 21818 21970 21603 22275 21568 22115 21798 21824 21813 21915 21523 22218 21389 22240 21543 22160 21407 21991 21765 21843 21770 22185 21639 21993 21553 22165 21424 22279 21273 22206 21335 22285 21142 22363 20885 22359 21456 22313 21381 22219 21353 22299 21452 22136 21542 22189 21511 22123 21493 22084 21552 21929 21764 22024 21585 22160 21473 22090 21479 22323 21489 22288 21268 22361 21334 22186 21276 22176 21362 22044 21357 22010 21519 22116 21526 22028 21359 22016 21415 22109 21305 22372 21509 22150 21204 21973 21273 21968 21409 21989 21232 22179 21210 22160 21335 21935 21389 21970 21511 22068 21541 21859 21349 22080 21381 21921 21573 21960 21624 21884 21520 22062 21515 21968 21323 21941 21570 21942 21568 22017 21489 21999 21379 21935 21495 21943 21412 21878 21489 22039 21545 21956 21479 21772 21555 21817 21456 22183 21286 21879 21891 21777 21624 22187 21769 21883 21806 21835 21649 21801 21475 21919 21706 21666 21815 21934 21383 22020 21767 21593 21783 21668 21440 22165 21609 21539 21939 21601 21476 22222 21455 21591 22085 21705 21504 22104 21401 21735 22148 21596 21373 22237 21405 21657 22054 21307 22090 21888 21629 21636 22113 21370 22162 21745 21608 21638 22161 21328 22140 21831 21667 21805 21902 21346 22039 21683 21531 21738 22016 21418 21996 21775 21675 21718 22181 21307 22104 21745 21864 21529 22093 21426 21949 21826 22026 21623 22237 21636 21919 21593 22120 21124 22108 21707 21861 21513 22304 21408 21914 21728 21957 21884 22243 21557 21784 21515 22261 21252 22116 21621 21854 21489 22284 21293 22091 21649 22050 20805 22361 21454 21852 21509 22200 21256 22045 21627 21924 21469 22223 21376 21701 21738 22057 21141 22269 21737 21872 21437 22288 21255 22183 21289 22159 21340 21959 21434 21922 14111 15976 15647 16400 16064 16969 16612 17119 16733 25603 23983 24097 23104 23459 22364 23184 21872 22632 21981 22471 21616 22367 21788 22205 21712 22385 14693 16481 16817 17835 17705 18131 18026 18396 17984 18669 24800 24089 23285 23427 22465 22736 22161 22645 22389 22295 22105 22222 21821 22349 21797 22145 21661 17229 17430 18522 18592 19178 18808 19399 19285 19665 19109 24264 23403 22869 22561 22951 22064 22109 21983 22416 21777 22203 22235 21701 21708 22288 21911 21856 18368 19761 19273 19814 20168 20160 19876 20272 20449 20373 23005 23157 22162 22225 22416 22205 21719 22053 22256 21719 21730 22350 21799 21791 22226 21520 22060 20324 21039 20264 21212 20886 21280 20777 21504 21120 22720 22292 22494 21904 22017 22059 22117 21587 21945 22004 21863 21683 22129 21819 21782 21815 22336 21470 22157 21745 21930 21461 22331 21547 21922 21801 22041 21559 22317 21495 22080 21786 21895 21645 22216 21573 22284 21433 22053 21768 21939 21689 22045 21591 22260 21291 22401 21292 22209 21624 21926 21616 22109 21432 22373 21275 22429 21271 22267 21720 21867 21700 22096 21479 22215 21491 22301 21457 22179 21551 21981 21542 22045 21371 22154 21439 22023 21447 22031 21461 22141 21314 22028 21637 21835 21543 22088 21628 22091 21524 22237 21289 22241 21159 22012 21554 21992 21504 22237 21207 21988 21526 22022 21302 22105 21353 21940 21605 21955 21253 21927 21510 21884 21446 21989 21525 21996 21636 21941 21371 21963 21513 21880 21373 22048 21370 21860 21527 21908 21352 21970 21808 21794 21393 21766 21783 21585 21520 21978 21966 21682 21425 21913 21688 21551 21592 22084 21719 21921 21576 22180 21669 21470 21406 22197 21860 21767 21463 22072 21752 21936 21505 21954 21889 21709 21344 21876 21962 21543 21442 21787 22152 21377 21981 21865 22033 21436 22309 21755 22253 21458 21939 21639 22102 21449 21696 21719 22105 21533 21598 21673 22083 21628 21749 21668 22203 21837 21810 21094 21968 21728 21975 21412 21920 21715 22053 21408 22028 21607 22092 21623 21882 21374 22139 21745 21994 21287 22139 21732 22049 21239 21973 21692 22269 21370 21813 21520 22263 21528 21841 21307 22265 21632 22073 21134 22176 21512 22237 21333 21978 21419 22305 21579 21824 21303 22138 21555 22080 21172 22106 21688 22189 21149 22016 21240 22236 21392 21906 21351 21941 21458 22140 21298 21712 21415 22032 21378 22016 21217 22021 21445 21873 21138 21996 21480 22086 21270 21970 21248 22030 21362 21959 21372 21950 21541 21960 21403 21840 21480 22093 21488 21283 21383 21978 21549 21877 20832 21857 21351 22007 21401 21885 21385 21813 21575 22011 21392 21879 21555 22000 21421 21730 21321 21753 21703 22080 21448 21760 21405 21905 21805 21790 21410 21804 21481 21902 22062 21751 21537 21677 21536 21814 21988 21800 21393 21575 21462 22249 21753 21453 21516 21584 21632 22216 21767 21697 21457 21600 21817 22223 21705 21667 21504 21808 21976 21716 21828 21178 21835 21683 22205 21797 21893 21309 21852 21593 22073 21888 21958 21527 21634 21622 21944 21862 22171 21577 21642 21384 21990 21657 22176 21668 21764 21249 21931 21784 22060 21586 21969 13107 15111 15428 16758 16324 16979 16403 17000 16652 17365 24937 24637 23344 23273 22669 22928 16583 18007 17703 18404 17715 18593 17940 19031 18346 25668 23755 23771 22684 23099 22515 18439 18426 19153 18660 19392 19138 19841 19399 20108 24489 24205 22588 23384 22100 22802 18771 19940 19664 20419 19761 20304 19972 20487 19963 20656 23192 23192 22224 22737 21984 20737 20324 21115 20738 21387 20692 21356 20669 21240 20807 22867 21984 22569 21981 22301 21607 22167 21627 22116 21641 22119 21755 22145 21601 21980 21687 21991 21525 22005 21654 22164 21556 21958 21469 21941 21490 21957 21689 22260 21711 21740 21668 21772 21728 21910 21863 22304 21747 21646 21650 21815 21460 21863 21862 22251 21944 21954 21372 21940 21520 21732 21737 22212 22117 21960 21514 21844 21523 21726 21639 21883 22082 22337 21820 21655 21539 21617 22167 21808 22041 21651 22131 21506 21870 21485 21788 21633 22001 21761 21995 21925 21969 21463 21656 21495 21861 21633 22087 21741 22180 21591 21995 21271 21799 21296 21798 21641 22224 21688 22158 21553 22022 21279 21817 21746 22092 21554 22208 21713 22221 21516 21719 21423 22136 
21490 21876 21323 21753 21293 21681 21582 21758 21405 21585 21345 21880 21270 21882 21284 21899 21348 21903 21365 21623 21385 21523 21593 21596 21785 21552 21457 21624 21335 21904 21405 21813 21395 21662 21472 21511 21687 21347 21707 21652 21632 21571 21725 21568 21320 21570 21738 21604 21585 21565 21702 21507 21723 21571 21655 21618 21786 21434 21705 21621 21550 21498 21781 21509 21559 21591 21742 21412 21751 21591 21607 21394 21849 21573 21693 21390 21664 21435 21949 21609 21952 21595 21710 21416 21570 21382 21461 21715 21544 21215 21522 21275 21639 21485 21580 21352 21636 21497 21645 21591 21579 21648 21559 21719 21442 21561 21477 21512 21336 21479 21403 21554 21550 21569 21455 21585 21509 21531 21585 21717 21557 21728 21645 21781 21525 21692 21533 21720 21561 21834 21576 21701 21410 21672 21481 21782 21472 21793 21475 21700 21422 21760 21380 21684 21357 21680 21376 21729 21298 21692 21271 21591 21202 21680 21160 21639 21229 21552 21349 21742 21248 21520 21317 21581 21367 21644 21204 21754 21290 21373 21457 22147 20699 21847 21370 21713 21223 21784 21344 21766 21306 21658 21313 21819 16080 17703 17306 18034 17702 18344 17802 18295 17867 23884 22489 22457 21591 22024 21431 21812 21326 21721 21262 21546 21309 21696 21181 21721 21176 21661 21234 21616 21333 21607 21367 21687 21384 21714 21333 21708 21354 21784 21289 21748 21417 21824 21543 21744 21537 21824 21543 21811 21524 21818 21530 21676 21364 21592 21291 21532 21269 21606 21434 21688 21310 21576 21305 21627 21248 21561 21212 21569 21312 21745 21172 21685 21429 21568 21220 21528 21360 21328 21456 21494 21524 21419 21542 21619 21620 21557 21682 21597 21637 21637 21632 21685 21687 21591 21709 21712 21744 21627 21750 21595 21745 21544 21604 21356 21654 21218 21617 21395 21520 21307 21636 21420 21654 21402 21754 21437 21808 21553 21777 21512 21782 21480 21821 21574 21859 21499 21773 21298 21698 21315 21761 21334 21600 21392 21643 21206 21712 21352 21792 21472 21863 21347 21905 21495 21869 21510 21833 21478 21890 21456 21943 21293 21831 21232 21773 21286 21786 21208 21762 21165 21900 21264 21780 21369 21897 21370 21892 21312 21921 21287 21888 21234 21811 21330 21835 21260 21846 21331 21888 21271 21835 21258 21808 21428 21844 21344 21810 21464 21899 21383 21744 17263 18716 18458 19095 18688 19639 18937 19415 18955 19419 22880 22737 21829 22411 21527 21901 21568 21659 21313 21655 21528 21623 21390 21725 21284 21824 21212 21710 21593 21590 21477 21533 21376 21694 21343 21904 21223 21895 21255 21856 21451 21817 21333 21889 21248 21906 21440 21643 21402 21653 21613 21560 21463 21597 21714 21490 21582 21434 21532 21567 21718 20965 21600 21504 21633 21486 21419 21613 21696 21642 21508 21468 21376 21457 21603 21655 21788 21659 21676 21336 21770 21287 21536 21470 21632 21449 21719 21440 21760 21474 21824 21474 21673 21385 21729 21284 21577 21418 21731 21483 21848 21508 21851 21448 21657 21482 21573 21369 21885 21506 21900 21405 21767 21172 21813 21517 21841 21504 21688 21289 21718 21472 21874 21487 21625 21145 21820 21366 21932 21285 21784 21424 21811 21299 21793 21368 21906 21307 21688 21281 21801 21297 21686 21260 21875 21251 21715 21268 21830 21229 21730 21387 21775 21288 21658 21250 21704 21203 21868 21386 22216 21408 21684 21325 21820 21395 21698 21433 21776 21301 21840 21320 21764 21422 21684 21360 21808 21375 21718 21401 21637 21436 21696 21253 21793 21284 21811 21344 21549 21545 21600 21352 19163 19285 20052 19620 20232 19840 19978 19961 20097 23444 22518 22058 21954 21500 21965 21463 21838 21384 21876 21336 21613 21472 21437 21393 21745 21633 21572 21664 21461 21605 21641 21571 21576 21543 21520 21664 21545 21690 21570 21654 21568 21687 21551 21692 21401 21724 21447 21747 21682 21685 21328 21728 21276 21777 21308 21704 21415 21828 21500 21521 21536 21747 21581 21681 21522 21579 21641 21773 21449 21699 21385 21815 21883 21779 21275 21789 21442 21784 21488 21749 21472 21564 21529 21781 21442 21892 21335 21888 21253 21863 21227 21844 21360 21745 21547 21738 21512 21735 21549 21716 21543 21895 21348 21952 21548 21816 21318 21735 21369 21786 21334 21785 21344 21794 21188 21675 21296 21723 21287 21825 21408 21764 21324 21805 21282 21849 21190 21897 21352 21784 21347 21709 21474 21636 21305 21860 21210 21849 21223 21716 21456 21650 21472 21569 21371 21821 21277 21824 21335 21770 21411 21699 21319 21712 21344 21941 21265 21803 21112 21706 21397 21632 21422 21599 21465 21858 21447 21651 21472 21527 21575 21459 21516 21794 21383 21787 21196 21661 21643 21563 21354 21744 21312 21888 21337 21723 21780 21509 21460 21590 21345 19857 19959 20587 20678 21134 20407 21046 20454 20791 20472 22556 22136 21687 21852 21632 21555 21602 21585 21592 21653 21616 21609 21655 21453 21540 21696 21411 21650 21631 21440 21691 21688 21585 21699 21472 21673 21586 21695 21382 21712 21426 21545 21525 21657 21531 21760 21386 21698 21545 21632 21421 21862 21366 21794 21553 21649 21399 21896 21382 21801 21512 21622 21401 21866 21242 21789 21504 21648 21346 21802 21297 21802 21435 21744 21319 21843 21436 21779 21471 21725 21237 21815 21445 21730 21488 21800 21077 21883 21458 21792 21293 21783 21491 21589 21297 21806 21170 21754 21368 21776 21387 21856 21467 21680 21275 21787 21235 21818 21393 21750 21172 21782 21433 21748 21218 21832 21120 21767 21353 21673 21196 21691 21489 22087 21280 21838 21326 21653 21329 21771 21356 21744 21372 21744 21372 21787 21331 21676 21324 21840 21402 21844 21383 21644 21258 21799 21441 21870 21437 21763 21374 21602 21365 21798 21169 21700 21435 21831 21487 21765 21546 21584 21289 21689 21621 21559 21336 21885 21408 21499 21515 21736 21340 21638 21624 21489 21432 21748 21410 21635 21597 21589 21431 21512 21335 21863 21431 21677 21639 21495 21479 21548 20853 21097 21017 21390 21308 21181 21435 21111 21487 22171 22055 21816 21652 21711 21576 21697 21499 21652 21408 21688 21379 21673 21483 21684 21359 21603 21543 21592 22112 21588 21656 21519 21673 21308 21656 21354 21666 21521 21669 21561 21654 21540 21952 21340 21851 21525 21633 21573 21680 21383 21851 21417 21656 21480 21685 21424 21871 21296 21760 21504 21762 21463 21880 21357 21678 21495 21895 21557 21882 21530 21857 21369 21796 21562 21848 21420 21845 21459 21870 21340 21805 21462 21922 21376 21753 21433 21839 21288 21848 21352 21778 21372 21707 21289 21774 21324 21705 21331 21767 21329 21760 21320 21705 21284 21833 21356 21650 21216 21909 21231 21664 21293 21690 21216 21948 21323 21769 21447 21656 21337 21834 21342 21911 21396 21762 21339 21753 21480 21802 21339 21637 21376 21781 21399 21773 21361 21764 21301 21833 21315 21792 21380 21840 21381 21651 21458 21784 21399 21722 21236 21741 21255 21818 21447 21872 21408 21824 21291 21881 21345 21841 21350 21891 21351 21804 21416 21851 21369 21913 21430 21985 21337 21860 21410 21753 21309 21735 21329 21861 21499 21888 21201 21936 21333 22030 21419 21916 21289 21948 21272 21635 21376 21589 21525 21415 21894 21623 21730 21413 21760 21353 21715 21465 21741 21589 21633 21618 21419 21577 21820 21463 21723 21403 21683 21557 21591 21760 22097 21632 21440 21683 21601 21417 21807 21211 21722 21527 21513 21524 21504 21513 21787 21573 21753 21536 21719 21595 21463 21597 21742 21416 21765 21447 21752 21587 21472 21579 21809 21427 21835 21243 21845 21547 21740 21533 21717 21355 21799 21288 21832 21588 21655 21527 21818 21261 21974 21440 21717 21464 21836 21376 21889 21386 21707 21479 21799 21326 21862 21354 21715 21528 21765 21422 21856 21273 21831 21465 21679 21485 21910 21176 21843 21389 21613 21495 21954 21236 21719 21403 21809 21394 21803 21353 21877 21441 21664 21319 21903 21312 21803 21412 21717 21312 21828 21317 21831 21504 21811 21258 21799 21137 21803 21360 21938 21392 21912 21422 21881 21371 21827 21351 21891 21408 21834 21525 21612 21429 21763 21287 21648 21403 21751 21366 21656 21498 21751 21433 21775 21384 21676 21416 21797 21360 21824 21285 21814 21376 21721 21341 21697 21366 21685 21388 21844 21384 21831 21437 21617 21435 21893 21324 21682 21558 21587 21317 21745 21398 21639 21420 21827 21388 21709 21639 21888 21500 21965 21373 21652 21609 21569 21248 21732 21594 21651 21420 21880 21341 21593 21687 21571 21432 21852 21357 21479 21445 21941 20920 21564 21685 21612 17373 18350 17998 18250 18347 18477 18521 18584 18670 23384 22772 22296 22125 21742 21886 21767 21632 21713 21649 21425 21545 21629 21623 21512 21674 21671 17376 18581 19071 19175 19279 19432 19547 19127 19522 19493 23363 22314 22410 21866 21698 21665 21742 21538 21734 21570 21748 21376 21769 21486 21668 21399 21806 18552 19436 19718 20172 19951 20162 20013 20427 20003 20383 22680 22364 21751 22089 21621 21760 21316 21921 21361 21744 21505 21866 21234 21769 21472 21702 21329 20072 20229 20521 20537 20857 20492 20885 20689 20992 22806 22618 21769 21926 21427 21882 21345 21703 21320 21868 21189 21756 21315 21739 21316 21781 21340 21701 20568 21303 20855 21255 20929 21531 20923 21473 20992 22356 21522 21884 21504 21961 21401 21815 21296 21735 21355 21831 21335 21784 21384 21666 21346 21835 21260 21736 21331 21795 21297 21762 21393 21644 21361 21764 21288 21667 21332 21643 21401 21595 21319 21863 21307 21693 21319 21657 21360 21760 21286 21616 21383 21836 21367 21763 21328 21783 21612 21664 21416 21549 21328 21783 21496 21650 21340 21632 21681 21623 21372 21661 21352 21933 20868 21680 21320 21660 21690 21756 21296 21880 21326 21744 21248 21515 21722 21588 21360 21878 21386 21839 21430 21979 21645 21579 21604 21571 21623 21429 21820 21585 21623 21713 21526 21504 21656 21560 21333 21687 21564 21383 21648 21587 21448 21675 21728 21377 21641 21573 21495 21467 21783 21592 21857 21533 21863 21274 21640 21653 21683 21319 21856 21508 21488 21405 21850 21426 21756 21576 21762 21260 21728 21537 21778 21257 21792 21463 21827 21367 21770 21504 21874 21226 21879 21468 21768 21385 21877 21433 21656 21527 21911 21460 21809 21712 21889 21472 21879 21490 21836 21386 21838 21417 21799 21249 21788 21317 21855 21240 21883 21344 21651 21361 21840 21450 21741 21282 21801 21323 21898 21296 21861 21369 22116 21309 21826 21357 21731 21249 21763 21337 21657 21179 21761 21384 21824 21378 21769 21327 21796 21314 21667 21403 21755 21395 21605 21274 21780 21353 21740 21329 21751 21433 21817 21528 21780 21296 21815 21207 21679 21472 21768 21468 21703 21370 21654 21612 21537 21303 21737 21539 21848 21318 21604 21398 21827 21493 21505 21318 21585 21632 21543 21393 21683 21521 21850 21335 21553 21319 21965 21347 21513 21412 21708 21628 21504 21320 21592 21655 21723 21616 21720 21545 21554 21474 21485 21747 21536 21617 21477 21570 21616 21706 21526 21264 21507 21684 21591 21537 21527 21603 21660 21657 21497 21642 21508 21690 21539 21514 21423 21773 21495 21733 21474 21550 21529 21885 21549 21654 21442 21824 21506 21809 21537 21515 21400 21918 21580 21734 21297 21773 21564 21875 21552 21700 21387 21760 21492 21890 21425 21670 21258 21944 21422 21786 21348 21744 21392 21856 21504 21829 21419 21467 21390 21872 21481 21816 21199 21820 21413 21852 21404 21865 21248 21719 21320 21775 21353 21939 21239 21767 21318 21717 21413 21850 21271 21671 21340 21788 21341 21856 21276 21955 21222 21915 21261 21812 21429 21660 21287 21816 21414 21776 21468 21808 21387 21651 21360 21776 21404 21735 21252 21653 21344 21728 21399 21858 16647 18456 17893 18503 18234 18798 18453 18804 18348 18843 22862 22656 21959 22008 21409 17640 18542 19267 19319 19764 19167 19651 19267 19706 19332 23464 22568 22210 21667 21744 21533 19293 19847 20283 19829 20342 19963 20244 20024 20397 23397 22672 21754 22065 21447 21684 19624 20451 20680 20768 20402 20691 20608 20844 20918 20764 22339 21928 21770 21525 21976 20571 21065 21217 21322 21239 21280 20965 21243 21152 21392 22168 21841 21765 21793 21590 21491 21445 21560 21495 21848 21634 21667 21530 21639 21232 21677 21489 21720 21597 21742 21560 21731 21344 21511 21316 21837 21543 21856 21447 21760 21238 21665 21348 21871 21540 21846 21484 21805 21169 21625 21297 21824 21545 21763 21547 21824 21369 21595 21769 21788 21543 21869 21510 21831 21421 21603 21384 21681 21288 21722 21338 21785 21432 21763 21382 21548 21416 21593 21449 21729 21354 21773 21450 21806 21319 21721 21280 21709 21326 21797 21329 21843 21368 21715 21209 21732 21271 21867 21343 21621 21426 21809 21349 21640 21834 21605 21269 21722 21261 21741 21388 21897 21355 21696 20819 21719 21355 21766 21355 21841 21472 21632 21376 21618 
42674 37328 41249 36102 40838 35074 33833 35885 42008 34010 41159 37336 40530 37408 40613 37575 41376 37767 41710 34682 41584 33284 33828 33845 35944 33189 42199 34553 41236 37398 42086 36626 41804 35060 42391 33241 34972 41302 35584 34432 34007 33487 35465 33362 40823 33730 35533 33936 33639 33546 35063 32713 35398 33570 34546 34086 35938 42233 35505 34284 33376 42800 36274 32827 33424 33857 35686 41869 36184 34021 34105 41543 37076 33713 35090 42235 37539 33219 34957 41600 37520 43040 35703 40502 36903 42440 37681 41904 36173 42603 37220 41420 34045 42861 37936 42711 39290 41772 37853 42743 36689 41264 37952 41548 36306 40872 37497 41136 37710 41893 36547 40347 33325 33361 42496 34043 32703 33037 33561 35261 33434 35200 34504 35893 33024 34954 33187 35192 33480 36482 33611 35053 41774 34996 42712 36265 42456 36320 42688 35361 42152 35776 41472 35132 41551 34983 41273 35672 40676 35300 40526 34209 39717 34896 39271 34614 40280 33440 41249 36010 40006 32995 40840 34117 41612 34711 39808 36032 40704 42084 42656 40176 34880 36816 41684 35488 40233 36097 41099 36000 40904 34848 40821 36720 37383 33428 38813 36973 33285 39820 34499 39669 35387 38240 43650 43616 34369 38417 42436 36551 41246 35680 40441 33541 40936 35116 39770 35597 39527 34936 40144 34235 41120 34442 41624 35361 41508 35465 41184 35492 41431 36147 40711 35892 42048 36552 33396 35404 33060 36160 33366 36210 32928 36295 33100 34720 41420 34080 40732 33376 40333 34288 42140 35217 41018 33841 40802 34703 39936 33730 39936 33687 40633 35840 39541 35139 42133 33677 39927 33172 41180 41189 42539 43264 33299 42016 33555 34145 34101 33367 34707 34009 34249 34249 33991 34888 35044 33930 35271 35072 35493 34448 35719 34025 35559 33165 33832 41367 34839 39986 34362 41675 33058 40861 34464 42000 34840 41788 36120 42402 36406 33336 35692 32721 35808 42633 36885 33692 36817 43110 36288 40707 35229 40931 35834 41216 34088 41408 34763 39888 35292 41299 36150 42455 37356 41427 37520 43108 37478 32880 36457 42722 37358 42336 38215 40966 36887 40125 36148 40648 36219 39922 35776 39588 37454 40256 36041 41648 37514 41728 37351 40832 37684 40849 37166 40251 36532 41088 36936 40386 36949 41223 37180 40626 36917 40352 36308 42095 36914 41188 36453 42496 37656 41809 35797 38760 33895 30693 37751 33298 33536 36258 41348 36678 41424 37581 35920 36540 42689 33501 37297 33453 34596 40790 34906 32913 34265 41708 35842 40537 36487 40074 35545 33915 33760 42592 33592 41216 35430 41505 37393 40328 37509 40448 36896 42552 36733 41250 37292 40064 37437 42144 34797 41794 34822 34254 33319 42486 34413 35147 42688 34196 42135 33448 33679 35266 37427 33891 32415 34019 42777 42517 34613 34845 34333 32589 42416 41682 42683 34377 34592 35983 34723 34805 41080 36013 40775 33228 42565 34400 42296 35783 42048 35772 42546 36587 42598 35147 41608 35682 40520 33927 41925 35816 42865 37012 32740 36773 42304 34928 42679 33984 41539 37618 32727 37152 42059 36142 39501 36534 33053 36475 32549 34757 40644 35584 42420 37300 43106 34701 39213 36615 41632 37952 40745 36119 41925 36610 40843 36240 41537 37521 41101 35164 40456 36416 40724 35208 40310 37319 40282 35534 40320 36739 40392 35640 41752 36329 40609 34824 40042 35292 39893 37221 41716 40844 41985 35159 41176 36704 41804 35278 42204 35978 40853 36723 40998 35861 42188 35164 41280 36352 41939 35632 41840 34618 42208 35187 40216 36208 40552 36535 41163 33752 33196 33680 41204 39049 40091 38295 33472 39725 35815 37283 37415 38571 43453 44279 39369 37988 43119 38512 42790 37048 41607 37300 41225 34545 42369 42730 42015 35897 34201 33432 34385 42432 34402 34320 33536 33466 33232 32612 34346 33204 34907 33431 34432 33292 34971 33512 34970 41784 35744 42420 36053 34816 34935 40908 35552 40517 36029 40944 35336 42069 36706 43033 33248 32836 35606 33844 34715 32792 33657 34275 35875 42384 35424 41624 36746 37270 35989 40609 36384 42192 36196 42652 36103 42457 33906 32985 35815 42163 37376 41395 37193 40320 37271 40348 36839 41379 35896 33418 35504 32713 35536 33427 35126 33309 37196 41331 37969 33411 36213 40996 35928 41646 36265 41225 36250 41152 36240 39664 35105 40537 35757 40759 36608 41760 35900 41096 36600 40532 37009 39808 37436 41414 36155 41365 35620 42544 34560 40835 37044 40066 36983 40338 35463 42231 34707 42376 33836 41655 36832 40712 36496 41351 36048 41953 35398 41103 35337 41107 38043 40416 36529 38925 35349 41768 34354 42117 34487 42507 37099 42501 34832 42384 33461 33644 42371 33240 35881 41705 36379 39888 34952 34457 33559 41324 35760 40742 37158 41321 35795 35844 32784 42240 34165 41177 36180 37413 33345 34050 39047 42136 38449 42516 35796 42509 34112 39768 35271 36820 34119 33361 33792 33617 33681 34442 33947 34045 34575 42450 33456 34784 41861 34684 34569 42004 35436 34912 33638 35008 42376 35089 33674 35201 41542 35371 41997 33616 32906 34464 33116 35360 41600 35273 33271 33944 42073 37224 41644 36281 33340 34276 41816 37408 41656 36487 32775 34140 41741 37260 40456 36375 32557 34123 41144 36448 40714 36436 42385 35816 41110 36949 42336 36213 42852 35909 40366 36689 42368 35728 42624 36416 38572 37455 42452 36188 40864 36304 42886 34250 40617 36581 39475 36008 41538 35948 41773 36956 42742 35045 40585 36334 40283 36618 41686 36040 39494 36121 42245 35968 40000 36665 38789 35995 41454 35083 39808 35336 42716 39680 40576 36957 41258 34816 41024 36131 41500 35786 41681 35797 41680 36378 41180 35116 41058 36719 41868 36900 41764 34710 40247 36465 42208 37399 42480 36000 41794 34210 41513 36411 39477 35215 42317 36939 43073 36070 33317 33450 40568 35257 34276 33518 41014 37592 41804 43393 33377 35392 41270 34598 34183 42647 42481 35970 41845 34584 34021 33766 42178 33050 41178 37296 42376 35277 34425 42921 43209 33715 36085 38795 37994 41895 41235 40053 42583 39367 43220 40667 39272 36468 34481 35396 33564 34886 42972 34790 41676 35184 41523 35083 42839 35192 41678 34321 33302 33672 39257 33914 34407 33045 34685 40864 34740 41420 34884 32816 34605 33458 34432 33044 37598 41377 37177 33088 34052 33548 34594 41620 37179 42112 34793 42595 35303 41880 37536 40665 35705 32519 35437 42595 37408 41675 35253 42976 37632 33526 37100 33140 36685 41680 36312 33548 36584 42092 37024 42555 37449 41384 36608 42567 37752 41420 36115 42246 37152 40651 36915 41387 36064 41684 35594 40680 36171 41108 35458 41136 36100 41069 35720 40933 35452 40519 36792 41536 34675 39821 37579 40544 34722 40789 35272 39846 38082 41274 36050 42441 34816 41209 36823 41464 37755 41793 35853 41368 36096 42650 36513 41404 34615 41250 36205 41925 36231 41462 35888 40861 36811 41024 36119 41496 36714 41642 34793 42308 36186 41925 35713 40212 35991 40376 36619 42465 37202 41788 36547 40848 37433 41332 36840 41448 37412 41600 36505 41969 37176 41731 37721 42285 38515 41406 37078 41920 36112 41072 35916 41069 37174 43141 37254 39882 37730 41308 38979 42316 37792 40800 38133 40528 34531 41254 34128 32932 41924 37472 34490 35369 41942 35767 41433 35590 42544 36096 33880 34089 34040 42049 34001 36390 42659 35861 41911 35239 33432 33856 35376 39259 34232 41964 35227 33907 41928 36756 40165 35634 33126 32710 32730 32347 32653 35968 33589 35744 32957 35340 34006 42544 34405 35718 41908 36021 42439 36042 33843 42323 34133 36160 42160 36992 40555 36967 33479 35559 33219 35232 41508 36534 40608 36701 33799 34564 33062 36293 40489 38384 42185 35667 42448 36928 41379 37312 41718 35601 42807 36580 41240 37194 41496 35594 32962 35591 42166 36977 40560 36864 42628 35399 42889 37728 39623 36880 41856 34583 42944 38144 40336 35700 41952 36480 41672 36596 41475 37410 42260 34806 41068 37757 40839 36574 41906 35642 40741 36644 41046 36886 32583 36170 40312 36468 39090 36471 41350 37888 41648 37612 42262 37504 41841 36756 41559 37417 41799 36852 33080 34041 42080 35985 40744 34524 41888 36167 41609 34775 42882 36224 42261 36352 41561 35128 41892 36425 41367 36527 40664 36592 41365 35670 41409 35265 41552 35248 41656 36882 41590 36908 42448 34492 42280 37486 41174 35087 33438 33686 40894 35872 41781 34732 42029 36768 41734 35636 34444 36836 43045 38505 41936 34730 34094 33379 39865 35642 33909 34404 42001 37373 41528 34199 35021 33552 41994 37111 41656 43128 42727 38116 36968 33625 34884 34081 39715 40431 36793 39146 40364 31392 31418 31991 33313 42617 36611 41392 40177 35979 37376 35923 34071 35132 34370 41930 33613 34403 34341 32647 34673 34809 39417 32455 37808 39020 40171 41577 33012 38274 32304 31744 42368 41970 42936 37312 35082 34574 35724 33066 35440 33461 35568 41299 36051 42912 34984 41861 36636 31988 41296 34685 39456 37546 39337 38001 42279 37872 41887 35424 42240 36182 39396 34477 35424 40856 37689 41536 35804 32637 36856 40231 36011 42448 35456 41038 38583 40051 32554 32362 36071 31896 36234 34247 37226 36642 34577 35741 37596 42226 37499 41320 35527 40928 37269 39832 36068 40976 35970 40890 36198 41307 35412 32807 40791 36496 40390 37046 33257 36875 42601 37607 42156 33193 37127 32586 37850 41952 36759 40624 35909 41568 36904 41370 36156 41546 34887 41192 36936 40396 35734 41164 36352 40712 35814 41638 34712 41386 35879 40588 34945 41035 34752 41792 34337 41045 37288 41088 35446 41091 34876 41280 35725 40640 34259 41632 36882 41760 35974 40944 36312 34208 34411 41853 33747 40848 36288 42836 34732 41235 34330 34759 34346 41602 35021 41303 38056 36294 34740 40889 34884 34996 35808 40576 37305 41284 35780 39977 33181 35300 33705 41220 37384 41732 37120 42259 38544 34681 33747 33862 33486 34293 42082 36752 33760 34311 35136 32984 32361 34324 33322 41095 35328 33548 41594 34565 33760 42153 35219 35296 41402 34664 33585 42872 43060 36409 33838 36681 33280 36964 40544 34515 34488 34885 41056 36931 32736 42458 42336 37093 42087 36116 33631 35490 40304 35527 33072 35674 40288 36114 42641 36805 41744 36073 32538 36851 40233 37475 42698 36010 41643 37416 42320 34807 33059 37393 42484 36521 35084 37014 42502 37559 42804 36940 41708 37000 42077 36548 40135 36251 41031 37296 40353 37544 41205 34775 41382 36736 42424 36087 40504 36429 41200 37476 40656 37170 41709 39809 41254 36633 41632 35817 40100 35904 41261 34869 39714 35776 41542 36536 41472 36053 41349 36292 40872 34963 41908 36232 41774 34390 40448 36053 41456 35919 41064 36138 42261 36713 32999 35705 40571 36693 40101 35289 42410 35986 42618 35569 41632 34821 34133 32975 40812 35855 33208 36561 41036 34216 41704 36760 42944 33052 40865 33957 33984 33247 41504 35204 32840 36649 41353 33591 41007 38406 41476 33143 41730 35529 34393 32439 40773 34051 34596 35456 33965 35222 33264 33171 42393 43257 36097 32988 34016 42592 33830 33931 35114 32980 40089 32970 34732 33920 32976 32960 33890 34539 34546 42861 34712 32621 34883 33141 32695 42117 36239 43035 35905 42549 33794 32977 37238 33520 34444 42080 36565 32667 36086 33089 32851 41562 37863 33844 35477 40660 36172 33586 37014 33249 34912 41691 35756 42781 37361 42112 35048 40250 37964 42296 36309 41300 35765 41514 36945 32576 36392 42156 43075 42176 37191 42838 36628 40098 36663 42026 37125 41947 37272 40056 35674 40933 36300 41472 38025 40583 36074 41032 35601 41969 37062 40625 35111 41261 36297 41440 36938 40585 38149 40243 37772 40554 36471 42213 34965 40709 36541 42016 35975 42619 36408 41776 34800 41286 35942 41889 35959 40142 34760 41072 35554 41892 37062 31982 30388 35222 31428 38722 34983 30692 34519 40045 35504 37319 34757 38048 38617 42002 32865 31878 39462 40585 35168 38937 33929 39574 34699 40128 43765 34217 40474 34946 35476 33193 39992 36198 40688 36069 41243 37696 40089 37987 41972 43328 35267 35816 38965 42612 35181 33376 42192 34401 34832 41643 34632 33024 35915 36816 35120 41888 37809 35888 33017 37939 33146 38277 40097 41266 40704 40617 37604 40586 39336 41712 40376 36811 35792 36013 33868 42739 42700 33769 42888 37014 34240 34648 33013 34307 39984 35175 42704 35637 34072 35696 33400 35420 41089 33223 40752 36967 33408 36590 42464 35792 40331 34825 41222 37509 33206 36626 42827 36680 39483 34552 40626 36496 33334 35596 33400 36170 41642 34322 35664 36041 33361 37037 32853 36512 42211 34343 41454 35088 40547 35640 41242 36272 42144 35992 41595 33648 41801 34215 42293 35721 41440 36208 42391 36659 41152 35657 40372 35596 41189 36407 41088 36953 41584 35587 40020 35636 40553 37334 41600 34577 41964 36490 41421 34560 36440 34099 40361 35628 40448 35995 41699 37520 41632 35172 35800 35464 41542 35996 41568 36853 42498 34388 41255 34400 
23831 23468 23757 23706 23616 23576 23991 23487 23840 23601 23705 23548 23764 23663 23679 23668 23692 23401 23723 23605 23918 23510 23990 23516 23783 23541 23610 23762 23735 23374 23991 23664 23432 23762 23593 23575 23598 23884 23560 23808 23604 24043 23638 23822 23558 23671 23660 23925 23741 23808 23698 23751 23607 23827 23461 23753 23645 23931 23462 23847 23720 23949 23543 23944 23476 23822 23602 23905 23319 23997 23617 23896 23488 23995 23545 23975 23507 24051 23539 23869 23459 24064 23604 23859 23272 23986 23584 23939 23512 23793 23648 23920 23481 23915 23476 24055 23495 23959 23461 24061 23552 24358 23472 23928 23396 24222 23547 23911 23412 23794 23511 23779 23488 23908 23509 23764 23432 23872 23370 23824 23453 23895 23255 23950 23390 23772 23485 23868 23356 23948 23374 23828 23488 23816 23537 23833 23420 23872 23454 23720 23501 23767 23399 23768 23344 23864 23384 23767 23514 23255 23719 23160 23671 23160 23585 23175 23638 23115 23577 23189 23459 23111 23464 23288 23697 23249 23587 23072 23957 23232 23954 23285 23996 23520 24260 23286 23776 23265 23568 23156 23727 23176 23663 16831 19477 19488 20224 19816 20437 19919 20544 20175 20778 26007 25320 24320 24461 23863 24057 23692 23965 23520 23836 23527 23780 23497 23764 23387 23696 23369 23748 23520 23862 23515 23753 23477 23832 23462 23745 23484 23796 23506 23757 23497 23906 23650 23779 23619 23889 23671 23892 23639 23793 23587 23717 23488 23597 23504 23612 23431 23552 23401 23581 23413 23669 23280 23523 23333 23446 23297 23520 23360 23879 23441 23696 23450 23429 23283 23436 23304 23604 23431 23390 23649 23459 23715 23523 23715 23425 23725 23545 23867 23703 23731 23610 23724 23518 23774 23642 23735 23611 23813 23594 23754 23387 23646 23387 23680 23351 23725 23228 23472 23321 23697 23495 23764 23457 23780 23464 23757 23494 23791 23481 23809 23498 23896 23512 23865 23456 23796 23281 23740 23365 23750 23300 23620 23150 23673 23160 23687 23361 23788 23387 23799 23456 23904 23497 23850 23431 23927 23459 23916 23480 23912 23324 23840 23197 23701 23301 23746 23142 23681 23252 23740 23388 23918 23421 23717 23337 23797 23355 23815 23289 23811 23361 23847 23297 23803 23336 23787 23399 23789 23304 23744 23392 23853 23456 23776 23435 23766 23476 23746 23384 23784 23494 19679 20125 20800 20633 21120 20971 21248 20988 21443 21100 25359 24309 24368 23833 24028 23770 24015 23525 23804 23702 23725 23524 23816 23499 23760 23687 23760 23504 23687 23557 23867 23462 23713 23456 23646 23506 23608 23687 23650 23735 23557 23744 23516 23704 23648 23584 23571 23360 23792 23319 23738 23472 23528 23712 23780 23641 23533 23722 23449 23732 23680 23830 23328 23752 23573 23725 23465 23485 23496 23728 23633 23744 23591 23669 23441 23601 23400 23762 23514 23872 23546 23767 23439 23612 23367 23564 23339 23709 23452 23833 23482 23893 23534 23875 23546 23819 23419 23752 23208 23665 23420 23862 23553 23929 23452 23915 23288 23701 23191 23843 23393 23943 23410 23840 23373 23673 23420 23866 23539 23832 23296 23577 23459 24002 23493 23825 23407 23744 23362 23801 23236 23745 23400 23779 23205 23740 23395 23904 23399 23714 23310 23820 23303 23706 23292 23921 23345 23194 23383 23753 23229 23648 23369 23783 23265 23853 23409 23729 23385 23767 23340 23660 23383 23762 23401 23758 23309 23737 23453 23692 23203 23785 23393 23657 23446 23637 23459 23675 23853 23770 23424 23545 23504 23592 23564 23683 23256 23797 23401 23761 23432 19717 20960 21355 21573 21766 21444 21937 21749 22231 21902 25265 24332 24183 23959 23769 23969 23772 23795 23666 23457 23744 23417 23825 23504 23913 23419 23942 23456 23900 23491 23431 23911 23482 23801 23412 23764 23452 23879 23343 23890 23362 23815 23421 23825 23482 23802 23470 23692 23547 23689 23552 23628 23600 23665 23601 23637 23557 23815 23485 23596 23670 23720 23462 23692 23409 23901 23341 23847 23233 23836 23415 23874 23463 23737 23504 23732 23520 23652 23543 23768 23370 23785 23844 23951 23182 24000 23319 23947 23360 23764 23511 23725 23493 23705 23476 23834 23461 23911 23406 23875 23228 23921 23354 23949 23370 23813 23264 23801 23310 23845 23266 23786 23307 23780 23261 23808 23522 23785 23435 23983 23285 23762 23307 23842 23749 23732 23330 23843 23381 23699 23272 23765 23372 23808 23323 23719 23308 23722 23437 23715 23376 23675 23408 23689 23366 23755 23271 23795 23452 23785 23420 23660 23360 23834 23360 23773 23360 23720 23466 23837 23419 23712 23354 23783 23254 23645 23603 23616 23607 23477 23591 23757 23390 23620 23396 23637 23662 23623 23418 23750 23444 23808 23213 23599 23712 23413 23431 23740 23468 23814 23338 23576 21664 21427 22019 22428 22089 22438 22281 22423 22490 24813 24495 23895 23996 23797 23921 23424 23879 23573 23798 23688 23571 23552 23829 23432 23875 23522 23792 23635 23783 23451 23769 23504 23620 23597 23703 23464 23824 23415 23751 23608 23655 23578 23836 23240 23748 23489 23623 23448 23844 23258 23866 23466 23671 23465 23836 23256 23886 23513 23775 23479 23842 23348 23923 23494 23639 23498 23889 23220 23954 23472 23728 23466 23975 23192 23850 23468 23731 23424 23904 23385 23712 23542 23825 23355 23912 23424 23636 23525 23907 23212 23837 23232 23861 23303 23764 23463 23974 23360 23893 23260 23752 23419 23736 23309 23744 23392 23761 23253 23860 23199 23881 23392 23723 23328 23815 23408 23764 23338 23809 23223 23749 23481 23783 23317 23762 23465 23532 23426 23808 23353 23688 23342 23879 23405 23752 23414 23680 23416 23766 23503 23728 23268 23869 23275 23731 23453 23761 23351 23664 23492 23552 23309 23732 23590 23534 23476 23801 23552 23683 23430 23797 23288 23662 23512 23744 23496 23632 23638 23506 23478 23828 23379 23564 23586 23573 23404 23696 23530 23441 23633 23535 23395 23828 23544 23617 23721 23600 23472 23660 23407 23786 22267 22925 22708 22911 23084 22689 23274 22856 23120 22974 24064 23781 23664 23690 23751 23592 23744 23529 23719 22971 23845 23527 23769 24014 23796 23501 23811 23433 23744 23398 23795 23442 23633 23575 23853 23567 23799 23409 23872 23218 23827 23434 23720 23485 23666 23431 23897 23397 23790 23578 23926 23501 23875 23252 23889 23474 23938 23410 23913 23397 23808 23479 23623 23445 23936 23280 23847 23430 23866 23241 23803 23511 23880 23260 23827 23499 23787 23213 23936 23504 23850 23521 23832 23412 23943 23282 23689 23413 23790 23376 23924 23520 23747 23369 23770 23345 23861 23367 23809 23478 23832 23383 23798 23401 23781 23217 23797 23378 23840 23328 23820 23335 23784 23424 23828 23188 23809 23373 23747 23527 23756 23305 23797 23310 23749 23420 23664 23446 23736 23412 23750 23429 23904 23416 23634 23403 23594 23424 23694 23438 23783 23345 23792 23325 23793 23425 23776 23416 23580 23397 23810 23532 23680 23597 23653 23574 23607 23539 23754 23544 23641 23490 23700 23261 23646 23237 23649 23248 23599 23351 23552 23355 23696 23307 23554 23399 23573 23336 23691 23254 23571 23288 23616 23541 23559 23656 23649 23821 23475 23709 23558 23753 23685 23447 23389 23486 23793 23405 23744 23778 23719 23510 23541 23531 23598 23651 23499 23941 23363 23759 23305 23719 23476 23718 23705 23454 23671 23743 23380 23752 23369 23746 23478 23734 23596 23866 23682 23758 23488 23794 23320 23811 23473 23712 23568 23581 23567 23768 23576 23849 23427 23764 23515 23592 23536 23847 23379 23842 23311 23830 23542 23636 23525 23736 23373 23879 23336 23828 23495 23702 23511 23873 22796 23909 23415 23744 23517 23775 23319 23964 23221 23878 23464 23727 23377 23928 23196 23840 23522 23649 23447 23893 23245 23888 23527 23507 23441 23862 23280 23895 23485 23906 23501 23940 23136 23888 23434 24000 23341 23909 23431 23822 23427 23148 23347 23883 23570 23767 23450 23768 23375 23873 23144 23769 23362 24226 23308 23803 22728 23833 23475 23868 23256 23820 23241 23744 23415 23749 23344 23857 23362 23748 23448 23768 23392 23772 23511 23735 23485 23596 23464 23829 23346 23744 23483 23591 23371 23657 23483 23713 23450 23836 23413 23671 23463 23339 23408 23856 23232 23707 23451 23644 23378 23791 23305 23638 23452 23794 23400 23648 23562 23501 23492 23905 23402 23659 23641 23527 23462 23726 23365 23680 23492 23730 23488 23679 23814 23537 23480 23832 23367 23648 23733 23607 23322 23640 23652 23553 23450 23865 23357 23631 23719 23483 23417 23708 23517 23536 23512 23858 17925 19221 19766 19927 19946 20294 20266 20358 20633 20474 25933 25131 24957 24179 24323 24157 24244 23856 24091 23928 23832 23745 23946 23710 23889 23800 23889 19331 20569 20721 21047 20968 21452 21195 21421 21334 21653 25063 24815 24340 24429 23848 24253 24001 23969 23689 24100 23735 23870 23758 23971 23488 23931 23690 20970 21163 21787 21729 21964 21696 22209 21874 22038 25516 25040 24133 24140 23949 24288 23528 24121 23703 24020 23488 24134 23639 23886 23623 24007 23337 23892 21739 22415 21364 22636 22336 22502 22245 22864 22257 25001 24044 24335 23715 24156 23661 24007 23458 23950 23562 24025 23478 23904 23412 23845 23490 23849 22178 22880 22726 23031 22751 23253 22673 23207 22730 23361 23995 24073 23526 23911 23410 23855 23511 23921 23545 23898 23449 23798 23500 23897 23774 23866 23496 23764 23446 23950 23376 23808 23554 23713 23446 23846 23421 23799 23623 23792 23513 23885 23399 23791 23511 23793 23601 23636 23441 23815 23469 23879 23349 23709 23626 23631 23657 23636 23511 23809 23483 23886 23362 23761 23639 23586 23624 23601 23447 23920 23477 23880 23412 23599 23700 23578 23822 23704 23516 23852 23438 23721 23446 23616 23713 23598 23533 23936 23605 23636 23792 23578 23709 23533 23670 23645 23716 23511 23916 23464 23764 23548 23745 23509 23795 23595 23664 23637 23803 23581 23856 23590 23697 23721 23730 23517 23770 23553 23545 23609 23884 23296 23784 23629 23680 23556 23889 23521 23623 23577 23860 23377 23861 23514 23809 23521 23856 23596 23778 23424 23935 23485 23689 23496 23936 23424 23640 23472 24012 23369 23809 23506 23970 23382 23343 23527 23991 23260 23841 23462 23990 23277 23772 23554 23973 23372 23857 23542 23913 23308 23841 23527 24044 23427 23158 23382 23913 23426 23890 23378 23785 23472 23789 23431 23785 23415 23739 23388 23827 23377 23923 23314 23841 23408 23799 23393 23831 23410 23920 23344 23808 23490 23931 23467 23821 23335 23809 23279 23722 23399 23771 23453 23636 23395 23733 23492 23728 23473 23808 23441 23867 23364 23671 23436 23834 23344 23674 23450 23890 23459 23600 23461 23725 23577 23758 23313 23765 23620 23808 23315 23632 23541 23848 23618 23862 23469 23704 23669 23533 23424 23731 23552 23878 23356 23563 23503 23945 23631 23663 23572 23667 23729 23481 23416 23700 23731 23828 23409 23624 23557 23874 23480 23692 23916 23610 23781 23349 23662 23705 23915 23494 23539 23490 23828 23622 23558 23586 23781 23735 23836 23517 23698 23563 23845 23578 23597 23495 23864 23661 23845 23308 23735 23552 23887 23584 23674 23405 23881 23630 23872 23331 23794 23556 23927 23501 23724 23859 23788 23545 23877 23433 23732 23413 23901 23607 23950 23360 23157 23476 23935 23559 23872 23296 23872 23474 23991 23458 23785 23313 23768 23537 24003 23413 23817 23371 23916 23531 23860 23389 23720 23387 24008 23339 23930 23454 23767 23335 23863 23484 23781 23417 24049 23367 23872 23439 23886 23484 23777 23240 23809 23309 23950 23450 23793 23402 23703 23389 23897 23375 23886 23253 23712 23401 23817 23415 23858 23397 24023 23392 23734 23531 23864 23511 23652 23376 23717 23397 23802 23501 18868 19235 19934 19823 20407 20198 20610 20512 20684 26697 25675 24847 24898 24149 24232 19679 20784 20897 21329 21249 21266 21392 21523 21465 21575 25532 25118 24341 24713 24038 20597 21248 22001 21925 21874 21901 21989 21944 22088 22128 25589 24669 24199 24302 24027 24051 22053 22326 22705 22538 22475 22407 22556 22857 22677 25104 24369 24344 23835 23984 23796 22959 22958 23238 23056 23251 23049 22991 22856 23129 23127 24279 23936 24015 23762 23953 23500 23709 23652 24024 23691 24081 23672 23867 23641 23816 23544 23876 23641 24025 23671 23912 23645 23728 23526 23894 23639 23959 23625 24000 23477 23816 23304 23954 23557 24032 23561 24065 23488 23816 23337 23897 23513 24048 23560 24019 23581 23920 23247 23829 23468 24014 23629 24000 23548 23936 23280 23783 23368 23944 23385 23943 23492 23978 23508 23919 23317 23863 23498 23868 23447 23896 23517 24029 23395 23855 23466 23884 23335 23855 23377 23841 23456 23973 23354 23826 23456 23783 23541 23820 23523 23875 23579 23795 23385 23881 23493 23798 23520 23785 23474 23862 23552 23785 23421 23176 23432 23789 23538 23911 23680 23831 23370 23771 23633 
22430 22816 22444 23044 22090 23137 22195 22994 22485 22691 22613 22519 22488 22717 22572 22521 22544 22784 22452 23254 22507 22999 22279 22880 22128 22930 22157 23001 22256 22765 22400 22811 22163 22951 22344 22883 22387 22870 22112 22903 22285 22675 22248 22984 22050 22822 22441 22690 22159 22932 22314 22664 22263 22973 22378 22607 22363 22757 22148 22929 22374 22633 22353 22757 22272 22754 22493 22775 22323 22806 22279 22668 22153 22875 22404 22608 22164 23026 22353 22555 22169 22921 22391 22460 22490 22768 22771 22517 22150 22393 22666 22822 22332 22517 22439 23059 22309 22401 22245 22942 22368 22405 22302 22929 22390 22393 22235 22933 22352 22699 22545 22689 22741 22233 22774 22506 22586 22400 22885 22192 22862 22625 22428 22442 22742 22788 22628 22718 22588 22501 22825 22165 22968 22471 22491 22508 22821 22215 22825 22453 22701 22516 22506 22499 22772 22114 22997 22162 22766 22382 22519 22507 22752 22285 23044 22236 23135 22166 22945 22312 22629 22304 22823 22289 23013 22034 23012 22339 22988 22276 22852 22455 22579 22435 22867 22259 22999 21989 23209 22256 23031 22118 22933 22055 22835 22185 17069 17437 17425 17683 17623 18069 17959 24320 23941 23957 23688 23633 23136 23336 23103 23209 22753 23057 22613 23079 22562 22967 22551 22881 22628 22992 22531 22980 22501 23033 22597 23074 22412 22997 22457 22949 22548 22983 22565 23148 22520 23250 22631 23220 22535 23139 22598 23183 22533 23085 22498 23168 22489 23182 22459 23117 22536 23054 22455 22979 22274 22920 22349 22951 22254 22343 22387 22748 22319 22917 22233 22857 22279 22850 22373 22893 22396 22827 22329 22945 22309 22950 22300 22963 22214 22964 22368 22954 22197 22871 22283 22775 22151 22776 22310 22776 22224 22698 22265 22670 22344 23251 22305 22708 22188 22628 22451 22824 22375 22877 22453 22827 22417 22850 22435 22840 22286 22710 22429 22742 22456 22555 22255 22636 22334 22592 22243 22562 22327 22669 22231 22346 22166 22736 22500 22790 22636 23137 22931 23019 22622 22896 22579 22689 22372 22621 22219 22634 22272 22619 22326 22372 22351 22921 22462 22369 22276 22571 22402 22233 22675 22558 22941 22343 22825 22481 22972 22549 22867 22567 22777 22592 22754 22700 22917 22645 22753 22545 22877 22695 22919 22655 22840 22460 22843 22249 22733 22305 22571 17511 18102 17869 18532 18349 19131 18720 19451 19140 24432 24050 24088 23328 23761 23415 23843 23024 23357 23031 23530 22560 23343 22818 23040 22756 23281 22485 23279 22331 23252 22467 23081 22662 22919 22676 22875 22603 22914 22563 23115 22544 22980 22556 23116 22214 22921 22304 23408 22342 22873 22283 22930 22246 23010 22275 22810 22464 22903 22217 22731 22272 22841 22131 22756 22412 22948 22193 23100 22268 22896 22344 22954 22308 22625 22199 22682 22391 22936 22518 22894 22285 22784 22391 22681 22358 22160 22205 22881 22232 22786 22437 22817 22400 22711 22299 22883 22321 22643 22298 22664 22206 22703 22543 22864 22594 22551 22409 22586 22200 22422 22528 22908 22456 22640 22312 22875 22393 22937 22759 22512 22321 22792 22315 22973 22688 22576 22290 22364 22933 22848 22284 22536 22245 22991 22392 22574 22178 22540 22617 22562 22455 22388 22991 22379 22437 22471 22961 22400 22676 22535 22821 22324 22700 22567 22663 22292 22898 22639 22451 22409 22858 22195 22784 22502 22711 22381 22938 22128 22638 22572 23020 22433 23072 22329 22944 22375 22602 22460 22749 22258 22996 22148 22988 22333 22797 22533 22721 22293 22926 22034 23054 18509 19550 18998 19807 19509 20006 19763 20320 19741 20608 23336 24208 23540 23863 22931 23462 22989 23119 22774 23101 22534 23192 22615 23061 22640 23030 22378 22951 22509 22991 22321 22966 22448 22850 22216 22882 22344 22981 22112 22917 22208 22840 22189 22986 22222 22836 22453 22801 22445 22784 22471 22652 22452 22744 22485 22801 22519 22973 22323 22656 22349 22821 22369 22889 22279 22938 21844 22864 22160 22808 22283 22798 22323 22695 22542 22695 22501 22574 22492 22755 22365 22877 22277 22811 22401 22718 22354 22687 22605 22602 22761 22566 22688 22449 22392 22729 22352 23040 22261 23084 22301 22752 22252 22710 22641 22569 22835 22675 22480 22652 22395 22986 22311 22932 22272 22664 22571 22636 22821 22412 22892 22149 22870 22567 22551 22628 22459 22528 22762 22416 22810 22257 22848 22476 22659 22684 22431 22658 22576 22353 22926 22204 22916 22311 22719 22497 22545 22435 22702 22322 22966 22122 23016 22353 22846 22490 22765 22409 22824 22247 22965 22185 22932 22465 22823 22434 22793 22199 23060 22038 23062 22160 22857 22337 22682 22362 22892 22256 22999 22071 22848 22406 22582 22425 22856 22245 23075 22151 22947 22353 22703 22118 20612 19928 20787 20318 20939 20501 20986 20576 21285 23031 23524 23108 23328 22750 23255 22374 23207 22390 23020 22531 22958 22282 23027 22257 23004 22507 22976 22313 22893 22281 22833 22509 22791 22474 22802 22218 22971 22343 22717 22433 22675 22375 22992 22261 22697 22429 22890 22305 22888 22338 22793 22387 22785 22306 22916 22441 22827 22521 22634 22352 22989 22356 22707 22589 22520 22451 22883 22370 22678 22728 22577 22432 22945 22336 22490 22755 22485 22313 22977 22502 22323 22368 22829 22229 22649 22593 22615 22329 22954 22293 22588 22715 22629 22184 22733 22558 22064 22211 22896 22538 22749 22696 22254 22820 22585 22512 22375 22956 22510 22441 22538 22835 22305 22734 22642 22529 22439 22740 22432 22608 22595 22922 22282 22694 22674 22759 22214 22886 22469 22509 22316 22924 22259 22583 22439 22839 22135 22768 22408 22665 22243 22970 22265 22745 22444 22876 22175 22800 22536 22982 22102 22843 22467 22858 22293 22956 22437 22709 22182 23049 22256 22635 22279 23079 22169 22791 22423 22962 21984 23034 22549 22724 22315 22950 22060 22905 22435 22701 22308 23032 22025 22971 22370 22906 22183 22915 22197 22816 22181 22771 22334 21399 21054 21697 21143 21853 21206 21830 21348 21984 21418 23528 22548 23088 22340 23108 22299 22912 22152 23116 22286 22995 22134 22940 22336 22990 22149 22880 22350 22952 22228 22722 22407 22595 22340 22656 22456 22791 22273 22768 22369 22762 22345 22694 22517 22700 22191 22794 22233 22793 22423 22552 22167 22762 22345 22688 22506 22584 22547 22773 22309 22777 22374 22615 22496 22771 22231 22300 22684 22624 22927 22647 22869 22626 22710 22823 22727 22531 21671 22792 22787 22544 22249 22331 22794 22606 22352 23002 22439 23031 22376 22377 22276 22870 22445 22489 22420 22372 22839 22449 22505 22406 22800 22415 22507 22520 22869 22223 22611 22518 22682 22515 22793 22369 22605 22675 22441 22417 22800 22414 22762 22561 22708 22549 22752 22162 22913 22184 22734 22387 22482 22396 22688 22349 22988 22201 22855 22280 22689 22437 22616 22528 22811 22347 22845 22181 22912 22109 22965 22096 23097 22213 22803 22241 22901 22363 22817 22446 22813 22373 22741 22320 22684 22371 22688 22402 22637 22331 22675 22304 22588 22337 22536 22443 22475 22400 22793 22421 22752 22504 22667 22464 22556 22381 22528 22326 22826 22259 22859 21973 23009 21964 22999 22540 22900 22277 22845 22279 22791 22176 22691 22272 22766 22447 22762 22097 22720 21937 22839 22011 22902 22002 22756 22267 22796 22299 22774 22098 22929 22134 22905 22110 22855 22209 22656 22404 22693 22211 22740 22314 22778 22125 22744 22262 22585 22423 22568 22226 22900 22280 22815 22250 22634 22352 22617 22235 22734 22134 22836 22144 22643 22299 22637 22317 22723 22283 22813 22091 22710 22375 22785 22332 22823 22373 22695 22440 22516 22523 22484 22263 22711 22045 22484 22656 22343 22407 22983 22147 22511 22753 22570 22271 22883 22204 22509 22872 22624 22305 22905 22213 22577 22780 22401 22361 22842 22288 22444 22725 22247 22420 22838 22273 22429 22767 22500 22407 22679 22308 22641 22361 22297 22848 22310 22677 22492 22532 22264 22929 22349 22684 22401 22661 22278 22749 22464 22593 22671 22576 22461 22800 22436 22583 22606 22631 22337 22866 22312 22568 22448 22730 22341 22901 22345 22599 22418 22942 22171 22823 22512 22563 22364 22850 22231 22675 22490 22702 22336 22933 22285 22547 22384 22853 22120 22880 22412 22584 22249 22926 22150 22771 22428 22765 21953 22955 22279 22728 22343 23040 21873 22917 22316 22652 22214 22995 22148 22832 22360 22837 22123 23079 22359 22599 22410 22960 22195 22722 22375 22736 22220 23019 22103 22955 22408 22951 22090 22855 22213 22795 22144 22805 22319 16881 16549 17637 17168 18094 17913 18529 18032 18649 18327 24806 24121 24522 23699 23986 23221 23957 23057 23596 22967 23418 22776 23512 22858 23257 22644 23148 17732 18577 18611 19024 18791 19425 19240 19552 19354 24690 24184 24329 23810 24128 23461 23828 23380 23541 23072 23383 23065 23176 22799 23304 22677 23191 22817 19740 19486 19943 19843 20357 20100 20581 20423 20457 23836 24363 23757 23847 23409 23811 23121 23376 23264 23190 22864 23100 23166 23755 22874 23296 22532 20487 20663 20872 20608 20887 21239 20977 20865 21457 21226 23502 23410 23880 23503 23253 23408 22996 22897 23137 23066 22922 22794 23349 22622 22855 22905 22597 21704 21626 21863 21784 22210 21800 21895 21812 22184 21911 23284 23211 23272 22732 23068 23009 23092 22518 23214 22959 22849 22739 23167 22640 22952 22775 22996 22354 23156 22731 22850 22706 22909 22503 23076 22669 22665 22689 23008 22295 23240 22437 22895 22742 22897 22544 23123 22375 23058 22318 23014 22509 22971 22573 22926 22350 23096 22468 23094 22336 23040 22471 22990 22573 22933 22373 23136 22371 23061 22365 22901 22598 22798 22512 22887 22480 23061 22129 23186 22236 22920 22433 22740 22195 23045 22145 22888 22403 22759 22192 22923 22328 22892 22381 22670 22407 22926 22208 22955 22079 22765 22247 22895 22186 22899 22239 22736 22224 22946 22209 22869 22330 22741 22276 22936 22306 22784 22463 22867 22371 22871 22371 22752 22482 22801 22309 22836 22488 22946 22287 22871 22329 22707 22362 22865 22073 22800 22336 22724 22291 22694 22433 22541 22375 22992 22566 22721 22311 22861 22434 23049 22360 23050 22413 22612 22433 22976 22273 22531 22330 22984 22227 22557 22388 23114 22317 22404 22341 23078 22323 22476 22376 23055 22297 22563 22450 22919 22784 22532 22228 22616 22604 22338 22896 22560 22725 22250 22611 22551 22988 22241 22608 22584 22799 22323 22583 22772 22819 22359 22566 22691 22884 22409 22729 22295 22832 22482 22563 22404 22917 22569 22768 22281 22770 22629 22848 22183 22688 22501 22966 22280 22632 22301 23034 22360 22556 22284 22924 22475 22809 22203 22864 22458 22854 22196 22790 22304 22997 22282 22635 22267 22999 22457 22792 22118 22896 22413 22955 22016 22802 22422 22979 22141 22605 22229 22928 22535 22764 22109 22912 22359 23018 21976 22823 22246 22926 22326 22756 22093 22967 22391 22631 22248 22843 22272 22869 22052 22688 22304 22876 22119 23040 22020 22743 22307 22761 22192 22736 22191 22932 22104 22766 22199 22839 22387 22650 22200 22750 22318 22781 22195 22712 22263 22796 22480 22668 22304 22795 22360 22816 22195 22724 22287 22740 22291 22576 21602 22628 22281 22920 22324 22444 22208 22710 22629 22825 22160 22592 22272 22613 22712 22655 22088 22462 22530 22681 22653 22446 22292 22377 22328 22816 22678 22413 22336 22386 22385 22900 22468 22370 22161 22565 22382 23081 22528 22557 22293 22610 22632 22980 22310 22633 22562 22794 22748 22513 22560 22043 22557 22295 22855 22500 22612 22310 22571 22434 22712 22603 22688 22419 22361 22274 22810 22612 22771 22421 22578 22342 22693 22602 22896 22319 22631 22285 22709 22407 22982 22343 22679 16269 17333 17392 18125 17961 18413 18016 18647 18312 24981 24517 24790 23838 24050 23431 19209 18885 19786 19243 19793 19189 20107 19523 20357 24547 25221 24158 24444 23620 24105 20076 20621 20080 20736 20059 20740 20418 21180 20641 21351 24309 24504 23655 24256 23442 21425 20857 21448 21088 21616 20998 21895 21084 21781 21210 24168 23556 24116 23157 23719 23040 22253 21759 22375 21786 22632 21936 22353 21805 22363 22903 23620 23085 23488 22931 23340 22817 23424 22635 23118 22693 23191 22790 23252 22741 22995 22583 23113 22705 23037 22741 23197 22668 23015 22679 23088 22528 22945 22715 23134 22650 22668 21956 22771 22590 22827 22909 23127 22775 22599 22392 22599 22479 22696 22521 23169 22871 22759 22379 22732 22432 22711 22551 23125 22843 23009 22259 22649 22282 22555 22502 22551 22922 23173 22738 22532 22341 22461 22770 22581 22981 22732 23015 22708 22962 22267 22504 22330 22786 22744 22956 22705 22791 22573 22546 22301 22680 22545 22946 22667 23121 22510 22747 22296 22572 22877 22832 22513 23079 22468 23064 22472 22844 22244 22706 22428 22816 22538 22961 22662 22953 22337 22618 22279 23032 
